# Supplementary material for: More accurate recombination prediction in HIV-1 using a robust decoding algorithm for HMMs
Source: Springer Nature journal article supplement (doi:10.1186/1471-2105-12-168), 2011-05-17

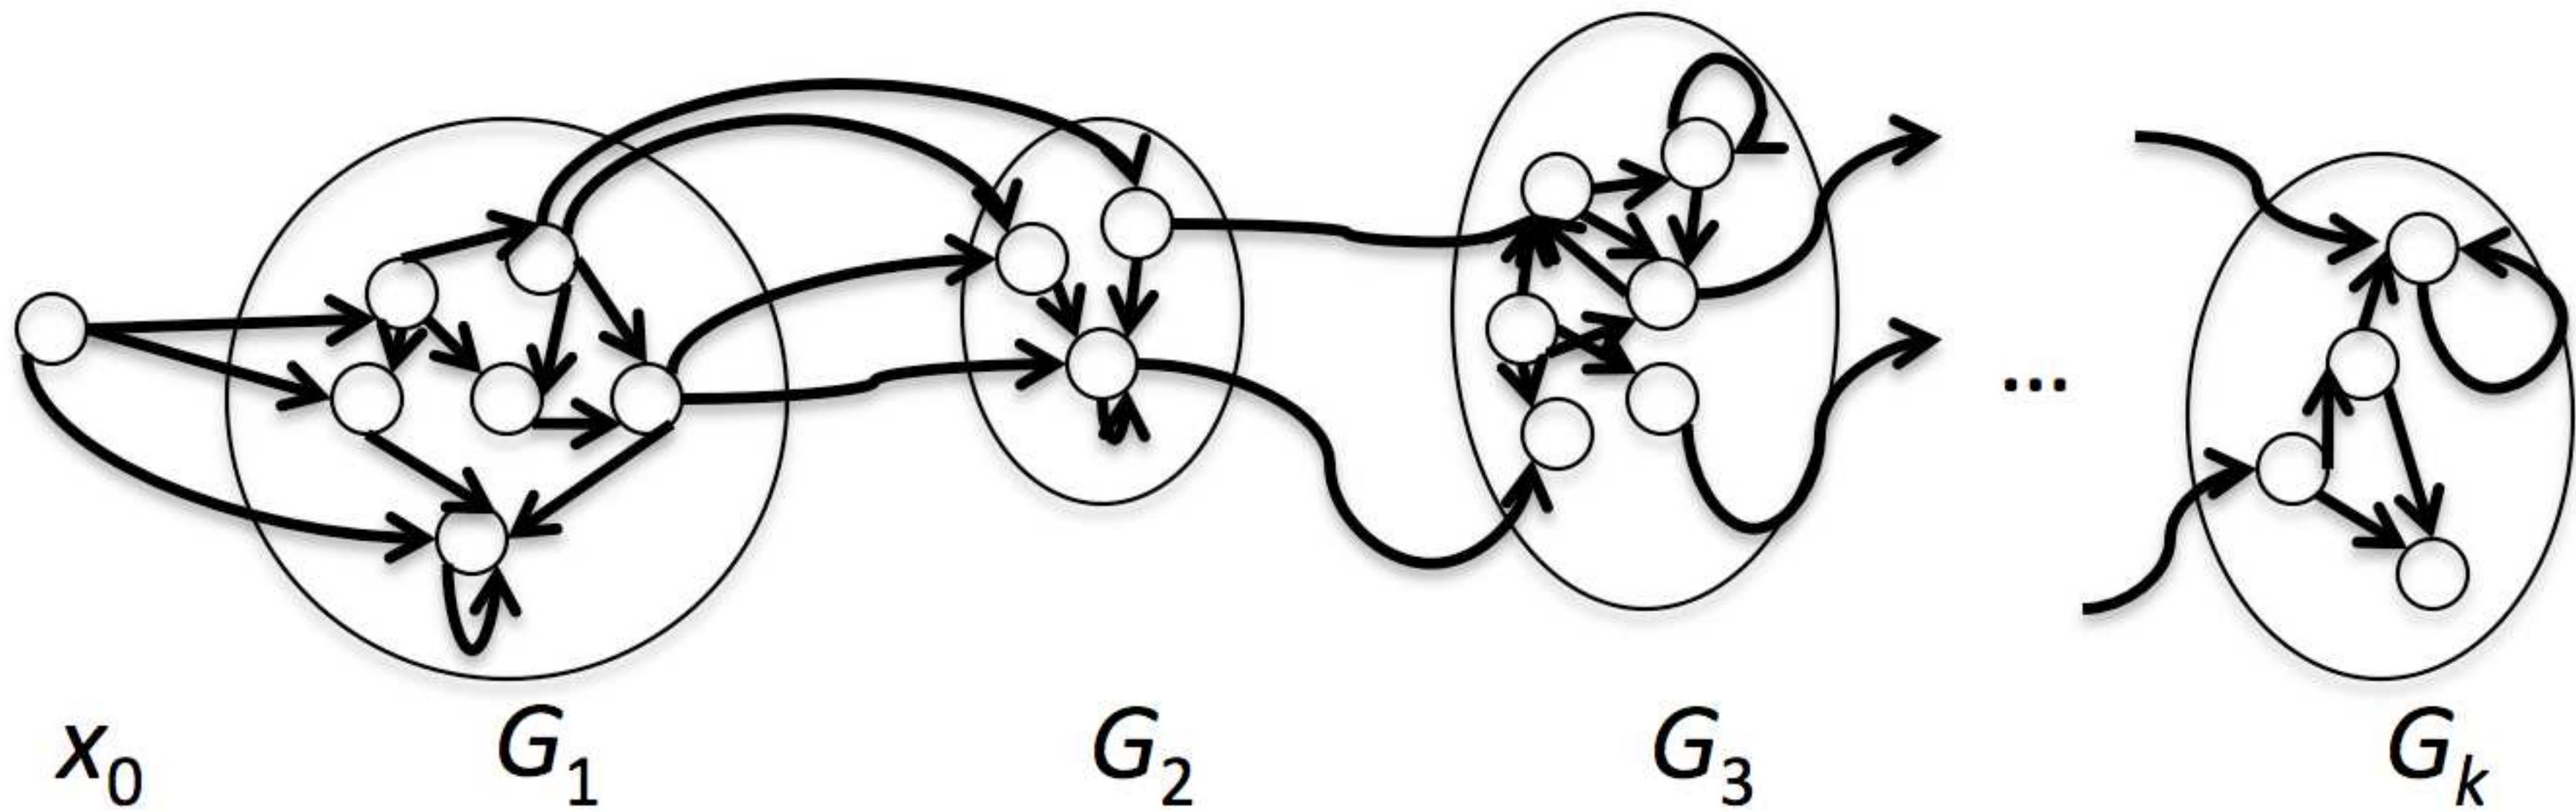

Supplement: 12859_2010_4578_MOESM5_ESM.pdf [file 12859_2010_4578_MOESM5_ESM.pdf]
