# Supplementary material for: More accurate recombination prediction in HIV-1 using a robust decoding algorithm for HMMs
Source: BMC Bioinformatics. 2011 May 17;12:168. doi: 10.1186/1471-2105-12-168 (PMC3123234; doi:10.1186/1471-2105-12-168)
Supplement: Additional file 1 — Data sets. This file contains sequences and their annotations for the single-breakpoint and short interval data sets. [file 1471-2105-12-168-S1.GZ]

Archive with 12 entries (11 files):
- datasets
- datasets/single_breakpoint_annotations.txt
- datasets/short_250.fas
- datasets/short_150_annotations.txt
- datasets/realCRFs.fasta
- datasets/short_150.fas
- datasets/short_200.fas
- datasets/short_250_annotations.txt
- datasets/short_200_annotations.txt
- datasets/short_100.fas
- datasets/single_breakpoint.fas
- datasets/short_100_annotations.txt
