# Supplementary material for: More accurate recombination prediction in HIV-1 using a robust decoding algorithm for HMMs
Source: BMC Bioinformatics. 2011 May 17;12:168. doi: 10.1186/1471-2105-12-168 (PMC3123234; doi:10.1186/1471-2105-12-168)
Supplement: Additional file 1 — Data sets. This file contains sequences and their annotations for the single-breakpoint and short interval data sets. [file 1471-2105-12-168-S1.GZ › datasets/realCRFs.fasta]

>02_AG.NG.-.IBNG
cagatctgagcctgggagctctctggctagcggaggaacccactgcttaagcctcaataaagcttgccttgagtgcttca
agtagtgtgtgcccgtctgattgtgtgactctggtaactagagatccctcagaccactctagactgtgtaaaaatctcta
gcagtggcgcccgaacaggacttgacggtaatagggactcgaaagcgaaagttccagagaagatctctcgacgcaaggac
tcggcttgctgaggtgcgcacagcaagaggcgagagcggcgactggtgagtacgccaaattttgactagcggaggctaga
aggagagagatgggtgcgagagcgtcagtattaagtgggggaaaattagatgcatgggagaaaattcggttaaggccagg
gggaaagaaaaaatatagactaaaacatctagtatgggcaagcagggagctggaaagattcgcacttaaccctggccttt
tagaaacagcagagggatgtcaacaactaatggaacagttacaatcagctctcaggacaggatcagaagaacttaaatca
ttatttaatacaatagcaaccctttggtgcgtgcatcaaaggatagacataaaagacaccaaggaagccttagataaaat
ggaggaaatacaaaataagagcaagcaaaaggtacagcagacagcagctgccacaggaagcagcagccaaaattacccta
tagtgcaaaatgccaaagggcaaatgacacatcagtccatgtcacctagaactttaaatgcatgggtgaaagtaatagaa
gaaaagggtttcagcccagaagtaatacccatgttttcagcattatcagagggagccaccccgcaagatttaaatatgat
gctaaacatagtggggggacaccaggcagcaatgcagatgttaaaagataccatcaatgaggaagctgcagaatgggata
gggtacatccagtacatgcagggcctattccaccaggccagatgagggaaccaaggggaagtgacatagcaggaactact
agtacccttcaagaacaaataggatggatgacaagcaatccacctatcccagtgggagaaatctataaaagatggatagt
cctgggattaaataaaatagtaaggatgtatagccctgtcagcattttggacataagacaagggccaaaagaacccttta
gagattatgtagataggttctttaaaactttgagagctgaacaagctacgcaggaggtaaaaaactggatgacagaaacc
ttgctggtccaaaatgcgaatccagactgtaagtccattttaagagcattaggaacaggggctacattagaagaaatgat
gacagcatgtcagggagtgggaggacctggccataaagcaagggttttggctgaggcaatgagtcaagtacaacaggcca
acgtaatgatgcagagaggcaattttaggggccagagaacaataaagtgtttcaactgtggcaaagaaggacacctagcc
agaaattgcaaggcccctaggaaaaggggctgttggaaatgtgggaaagaaggacaccaaatgaaagactgtactgagag
acaggctaattttttagggaaaatttggccttccagcaaggggaggccaggaaattttcctcagagcagaccggaaccaa
cagctccaccagcagagagctttgggatgggggaagagatacctccctctccacagcaggaaccgagggacaaggggcta
tatcctcctttaacttccctcaaatcactctttggcaacgacccttagttacagtaagaatagagggacagctaatagaa
gccctattagacacaggagcagatgatacagtattagaagacataaatttaccaggaaaatggaaaccaaaaatgatagg
gggaattggaggttttatcaaagtaagacaatatgatcaaatacttatagaaatttgtggaaaaaaggccataggtacag
tattagtaggacctacacctgtcaacataattggacgaaatatgttgactcagattggttgtactttaaattttccaatt
agtcctattgaaactgtgccagtaaaattaaagccaggaatggatggcccaaaggttaaacaatggccattgacagaaga
aaaaataaaagcattaacagacatttgtacagagatggaaaaggaaggaaaaatttcaaaaattggacctgaaaatccat
acaatactccagtatttgccataaagaaaaaggatagtactaaatggagaaaattagtagatttcagagaactcaataag
agaactcaagatttctgggaggtccagttaggaatacctcatcccgcgggattaaaaaagaaaaaatcagtaacagtgct
agatgtgggggatgcatatttttcagttcccttagataaagactttagaaagtatactgcatttactatacctagtgtaa
ataatgagacaccagggattagataccagtacaatgtgcttccacagggatggaaagggtcaccggcaatatttcaggca
agcatgacaaaaatcttagagccctttagaacaaaaaatccagagatagtgatctaccaatacatggatgatttatatgt
aggatctgatttagaaatagggcagcatagagcaaaaatagaggagttgagaggacatctactgaaatggggatttacca
caccagacaaaaagcatcagaaagaacctccatttctttggatgggttatgaactccatcctgataaatggacagtccag
cctgtagaactaccagaaaaagacagctggactgtcaatgatatacagaaattagtgggaaaactaaattgggcaagtca
gatttatgcaggaattaaaataaagcaactgtgtagactcctcaggggagccaaagcactaacagatatagtagcactga
ctgaggaagcagaattagaattggcagagaacagggaaattctaaaagaacctgtacatggggtatattatgacccaaca
aaagacttagtagcagaattacagaaacaagggcaagaccaatggacatatcaaatttatcaagagccatttaaaaattt
aaaaacaggaaaatatgcaaaaaagaggtctgcccacactaatgatgtaaagcaattaacagaggtagtgcaaaaagtag
ctatggaaagcatagtaatatggggaaagacccctaaatttagactacccatacaaagagagacatgggaaacatggtgg
atggagtattggcaggctacctggattcctgaatgggagtttgtcaatacccctcctctagtaaaattatggtaccagtt
agaaaaagaccccatagtaggagcagaaactttctatgtagatggagcagctaatagagagactaagataggaaaagcag
ggtatgtcactgacagaggaagacaaaaggttgtttccctaactgagacaacaaatcaaaagactgaattacatgcaatt
catttagccttacaggattcaggatcagaagtaaatatagtaacagactcacagtatgcattaggaatcattcaggcaca
accagacaggagtgaatcagagttagtcaatcaaataatagagaagctaataaaaaaggacaaagtctacctgtcatggg
taccagcacacaaagggattggaggaaatgaacaagtagataaattagtcagtaatggaatcaggaaggtactattttta
gatggcatagataaagcccaagaagagcatgaaagatatcacagcaattggaaggcaatggctagtgattttaatctgcc
acctatagtagcaaaagaaatagtggccagctgtgataaatgtcagatgaaaggggaagccatgcatggacaagtagact
gtggtccaggaatatggcaattagattgtacacatttagaagggaaaattatcttagtagcagtccatgtagccagtggc
tatatagaagcagaagttatcccagcagaaacaggacaggagacagcatactttatattaaaattagcaggaagatggcc
agtgaaagtaatacacacagacaatggcagcaatttcaccagtgctgcagtaaaggcggcatgttggtgggcaaatgtca
cacaagaatttggaattccctacaatccccaaagccaaggagtagtggaatctatgaataaagaattaaagaaaattata
ggacaggtcagagatcaagctgaacaccttaagacagcagtacagatggcagtattcattcacaattttaaaagaaaagg
ggggattggggggtacagtgcaggggaaagaataatagatataatagcatcagatatacaaactaaagaactacaaaaac
agattataaaaattcaaaattttcgggtttattacagggacagcagagaccccatttggaaaggaccagcaaaactactc
tggaaaggtgaaggggcagtagtaatacaggacaatagtgatataaaggtagtaccaagaagaaaagcaaaaatcattag
ggattatggaaaacagatggcaggtgatgattgtgtggcaggtagacaggatgaggattagaacatggaatagtttagta
aaacatcatatgtatgtctcaaagaaagctaagggttggttttatagacatcactttgaaagtaggcatccaaaagtatg
ttcagaagtacacatcccactaggggatgctaggttagtagtaagaacatattggggtctgcatacaggagaacgagact
ggcacttgggtcatggggtctccatagaatggaagcagaaaagatatagcacacaaatagaccctgacttagcagaccaa
ctgattcacctgtattattttaattgtttttcagactctgccataagaaaagccatattaggagaaatagttagacctag
gtgtgaatatcaagcaggacataataaggtaggatcgctacaatatttggcactgaatgctttagtagcaccaacaaaga
caaagccacctttgcctagtgttaggaagttagcagaagacagatggaaagagccccagaagaccaggggccacagaggg
agccgtccaatgaatggacactagaactgttagaagagcttaaacatgaagctgttagacactttcctaggccgtggctc
catggattaggacaacatatctatgaaacatatggggatacttgggaaggggttaaagctataataagaattttgcaaca
actattgtttgttcatttcagaattgggtgtcaacatagcagaataggcattattcaagggagaagaggcaggaatggag
ctggtagatcctagcctagagccctggaaccacccgggaagtcagcctacaactgcttgtagcaagtgttactgtaaaat
gtgctgctgcattgccaattgtgctttctgaacaagggcttaggcatctcctatggcaggaagaagcggagacgccgacg
aggaactcctcagagccgtcaggatcatcaaaatcctgtaccaaagcagtgagtagtaataattagcatatgtgatgcaa
cctttaacaataactgcaatagtaggactagtagtagcattcatagcagccatagttgtgtggagcatagtatatataga
atataggaaaataaggaaacagaagaaaatagacaggttacttgatagaataagagaaagagcagaagatagtggcaatg
agagtgatggggatacagaagaattatccactcttatggagatggggtacgaatatattttggataatgataatttgtaa
tgctgaacaattgtgggtcacggtctactatggggtacctgtgtggaagacggcagagaccaccctattttgtgcatcag
atgctaaagcatatgatacagaagtacataatgtctgggctacacatgcctgtgtacccacagaccctaacccacaagaa
atacatttggaaaatgtaacagaaaagtttaacatgtggaaaaataacatggtagaacagatgcatgaagatataattag
tctatgggaccaaagcctaaagccatgtgtaaagttaacccctctctgcgttactttagattgtcataatttcaacaaca
gctacagcaacagtagcaacctaactagtgacatgaatggggaaataaaaaactgctctttcaatataaccacagaagta
agagataagaaaaagaagatgcatgcacttttttatagacttgatgtagtacaaattaatgaaaataatggtagtcagta
taggttaataaattgtaatacctcagccattacacaggcttgtccaaaggtatcctttgagccaattcccatacattatt
gtgccccagctggttttgcgattctaaagtgtaaggataaagggttcaatggaacagggccatgcaaaaatgtcagcaca
gtacaatgcacacatggaatcaagccagtagtatcaactcaactgctgttaaatggcagtctagcagaaggagaagtagt
gatcagatctgaaaatatcacaaacaatgccaaaaccataatagtacagttggctaatcctgtaaaaattaattgtacca
gacctaacaacaatacaagaaaaggtgtacatataggaccagggcaagcattctatgcaacaggtgacataataggggat
ataagacaagcacattgtaatgtcagtaaaacagaatggaataaaactttacatcaggtagttacacaattaaagacgta
ctttaagaacaccacaataatctttgctaaccccttaggaggggatgtagaaattacaacacatagttttaattgtggag
gagaatttttctattgcaatacatcaaaactgtttaatagcacttgggataatagcaatagcactgccaaccacacaggg
tcaaatgacactataactctccaatgcagaataaagcaaattgtaaatatgtggcagaaagtaggacaagcaatgtatgc
ccctcccatccaaggaataataagatgtgattcaaacattacaggactactattaacaagagatggagggaataatagta
caaatgaaaccttcaggcctggaggaggagatatgagggacaattggagaagtgaattatataagtataaagtagtaaaa
attgaaccactaggtgtagcacccacccgtgcaaaaagaagagtggtggagagagaaaaaagagcggttggactgggagc
tgtcttccttgggttcttaggagcagcaggaagcactatgggcgcgcggtcaataacgctgacggtacaggccagacaat
tattgtccggcatagtgcaacagcagagcaatttgctgaaagctatagaggctcaacaacatctgttgaaactcacggtc
tggggcattaaacagctccaggcaagagtcctggctctggaaagatacctaagagatcaacagctcctaggaatttgggg
ctgctctggaaaactcatctgcaccactactgtaccctggaactctagctggagtaataaaacttttaatgacatatggg
ataacatgacctggatacaatgggagaaagaaattagcaattacacagacataatatataatctaattgaagaatcgcag
aaccggcaggaaaagaatgaacaagacttgttggcattggacaagtgggcaagtctatggaattggtttgacataacaaa
ttggctatggtatataagaatatttataatgatagtaggaggtttaataggtttaagaatagtttttgctgtgcttacta
taataaatagagttaggcagggatactcacctttgtcgttccagacccttacccaccaccagagggaacccgacagaccc
gaaagaatcgaagaaggaggtggagagcaagacaaagacagatccgtgcgattagtgagcggattcttagcacttgcctg
ggacgatctgcggagcctgtgcctcttcagctaccaccgattgagagacttaatcttgattgcagcgaggactgtggaac
ttctgggacacaactgtctcaagggactgagactggggtggggagccctcaaatatctgtggaatcttatatcatactgg
gttcaggaactaaagaatagtgctattaatttgcttaatacaatagcaatagtagtagctaactggacagatagagctat
agaaataggacaaagagtgggtagagctattcgcaacatacctagaagaatcagacagggcttcgaaagggctttgctat
aacatgggtggcaagtggtcaaaaagcagcatagtgggatggcctaaggttatgaaaagaatgagacaaacccctacagc
agcaacaggagtaggagcagcatctcaagatttagatagacatggagcaatcacaagcagtaatacagcacaaactaacc
ctgattgtgcctggctggaagcacaagaggatgagaatgtaggctttccagtcaggccacaggtgcctttgagaccaatg
acttataagggagctgtcgatctcagccactttttaaaagaaaaggggggactggatgggttaatttactccaagaaaag
acaagaaatccttgatctgtgggtctataacacacaaggattcttcccagattggcagaactacacaccagggccaggga
ctagattcccactgacctttgggtggtgcttcaaactagtaccaatggatccagcagaggtagaggaagccaatgaagga
gagaacaacagtttattacaccccatctgtcaacatggaatggaggacgacgatagagaagtgctgatctggagatttga
cagtagactggcattcagacacacagctagagagctgcatccggagtactacaaagactgctgacacagaagttgctgac
agggactttccactggggactttccggggaggtgtggtttgggaggagttggggagtggctaaccctcagaccgtgcata
taagcagctgcttctcgcctgtactgggtctctcttgctagaccagatctgagcctgggagctctctggctagcggagga
acccactgcttaagcctcaataaagcttgccttgagtgcttcaagtagtgtgtgcccgtctgattgtgtgactctggtaa
c

>03_AB.RU.1997.KAL153_2
gcggaggctagaaggagagagatgggtgcgagagcgtcagtattaagcgggggaaaattagatgcatgggaaaaaattcg
gttaaggccagggggaaaggaaaaatatagaataaaacacctagtatgggcaagcagggagctggaaagattcgcgctta
accctagccttttagaaacatcagaaggatgtcaacaaatactggaacagttacaaccaactctcaagacaggatcagaa
gaacttaaatcattatataatacagtagcaaccctctattgtgtacatcaacggatagagataaaagacaccaaggaagc
tttagataaaatagaggaaatacaaaataagagcaagcaaaagacccaacaggcagcaactggcacaggaagcagcagca
aggtcagtcaaaattaccccatagtgcaaaatgcacaagggcaaatgacacaccagtccatgtcacctaggactttgaat
gcatgggtgaaagtaatagaagaaaaggctttcagcccagaagtaatacccatgttttcagcattgtcagagggagccac
cccacaagatttaaacatgatgctgaacatagtggggggacaccaggcagctatgcaaatgttgaaagataccatcaatg
aggaagctgctgaatgggataggttacatccagcacaggcagggccttttccaccagggcagatgagagaaccaagggga
agtgacatagcaggaagtagtagtacccttcaagaacaaataggatggatgacaagcaacccacctatcccagtgggaga
catctataaaagatggataatcctaggattaaataagatagtaagaatgtatagccctgttagcattttagacataagac
aagggccaaaagaacccttcagagactatgtagataggttctttaaaactcttagagctgagcaagctacacaggatgta
aagaactggatgacagaaaccctgctggtccaaaatgcaaatccagattgtaaaaccattttaagagcattaggatcagg
ggctacattagaagaaatgatgacagtatgccagggagtgggaggacccggccataaagcaagggttttggccgaggcaa
tgagtcaagtacaaaatgcaaacataatgatgcagaaaagtaattttaggggcccaaaaagaattaagtgtttcaactgt
ggcaaagaaggacacctagccagaaattgcagggcccctaggaaaaagggctgttggaaatgtggaaaggaaggccatca
aatgaaagactgcactgagagacaggctaattttttagggagaatttggccttccagcaaagggaggccaggaaattttc
ctcagagcagaccagagccatcagccccaccagcagaaaactttgggatgggggaagagataaccccctccctgaaacag
gaacagaaggacagggaacagcatcctccttcaatttccctcaaatcactctttggcgacgaccccttgtcacagtaaga
ataggaggacagctaaaagaagctctattagatacaggagcagatgatacagtattagaagacataaatttgccaggaaa
atggaaaccaaaaatgataggggggattggaggttttatcaaggtaagacagtatgatcagatacttatagaaatttgtg
gaaaaaaggctataggtacggtattagtaggacctacccctgtcaacataattggaagaaatatgttgactcagcttggt
tgtactttaaattttccaataagtcctattgaaactgtaccagtaacattaaagccaggaatggatggcccaaaggttaa
acaatggccattaacagaagagaaaataaaagcattaacagacatttgtaaggagatggaaaaggaaggaaaaatttcaa
aaattgggcctgaaaatccatacaatactccagtatttgccataaagaaaaaagacagtactaaatggagaaaattagta
ggtttcagagaacttaataagagaactcaagacttctgggaagttcaattaggaataccacaccctgcagggttaaaaaa
gaaaaaatctgtaacagtactggatgtgggtgatgcatatttttcagttcccttagatcaagacttcagaaagtatactg
catttaccatacctagtacaaacaatgagacaccagggattagatatcagtacaatgtgcttccacagggatggaaagga
tcaccagcaattttccaaagtagcatgacaaaaatcttagagccttttagaaaacaaaatccagagatagttatctatca
atacatggatgatttgtatgtaggatctgacttagagatagggcagcatagaacagaaatagaggaactgagagaacatc
tgctgaggtggggatttaccacaccagacaaaaaacatcagaaagaacctccattcctttggatgggttatgaactccat
cctgataaatggactgtacagcctatagtgttgccagaaaaagacagctggactgtcaatgacatacagaagctagtggg
aaaattgaattgggcaagtcagatttatgcagggattaaagtaaggcaattatgtaaactccttaggggagccaaagcac
taacagaagtaataccactaacagcagaagcagagctagaactggcagaaaacagggagattctaaaagaaccagtacat
ggagtgtattatgacccatcaaaagacttagtagcagaaatacagaagcagggacaaggccaatggacatatcaaattta
tcaagagccatttaaaaatctgaaaacaggaaaatatgcaagactgaggggtgcccacactaatgacgtaaaacagttaa
cagaggcagtgcaaaaaatagccactgaaagcatagtaatatggggaaagactcctaaatttaaactacccatacaaaaa
gaaacatgggaaacatggtggacagagtattggcaagccacctggattcctgagtgggaatttgtcaatacccctccctt
agtaaaattatggtaccagttagagaaagaacccatagtaggagcagaaactttctatgtagatggagcagctaataggg
agactaaatcaggaaaagcaggatatgttactgacagaggaagacaaaaggttgtctccctaactgacacaacaaatcag
aagactgagttacaagcaattcatctagctttgcaggattcgggattagaagtaaacatagtaacagactcacaatatgc
attaggaatcattcaagcacaaccagataagagtgaatcagagttagtcagtcaaataatagagcagttgataaaaaagg
aaaaggtctacctggcatgggtaccagcacacaaaggaattggaggaaatgaacaagttgataaattagtcagtgctgga
atcagggaagtactatttttagatggaatagataaggcacaagaagaacatgagaaatatcacggtaattggagagcaat
ggctagtgattttaacctgccacctgtggtagcaaaagaaatagtagccagctgtgataaatgtcaattaaaaggagaag
ccatgcacggacaagtagactgtagtccaggaatatggcaactagattgtacacatttagaaggaaaaattatcctagta
gcagttcatgtagccagtggatatatagaagcagaagttattccagcagaaacaggacaggaaacagcatactttgtctt
aaaattagcaggaagatggccagtaaaaataatacatacagacaatggcagcaatttcaccagtactgcggttaaggctg
cctgttggtgggcagggatcaagcaggaatttggcattccctacaatccccaaagtcaaggagtagtagaatctatgaat
aaacaattaaagcaaactataggacaggtaagagatcaagctgaacatcttaagacagcagtacaaatggcagtattcat
ccacaattttaaaagaaaaggggggattggggggtacagtgcaggggaaagaataatagacataatagcaacagacatac
aaactaaagaattacaaaaacaaattataaaaattcaaaattttcgggtttattacagagacagcagagatccaatttgg
aaaggaccagcaaaactactctggaaaggtgaaggggcagtggtaatacaggacaataacgatataaaagtagtaccaag
aagaaaagcaaagatcattagggattatggaaaacagatggcaggtgatgattgtgtggcaagtagacaggatgaggatt
agaacatggaacagtttagtaaaacaccatatatatatttcaaagaaagctaggggatgggtttataaacatcactatga
aagcaggaatccaagaataagttcagaagtacacatcccattaggggatgctaaattggtaataaaaacatattggggtc
tgcatacaggagaaagagactggcatttgggccagggagcctccatagaatggagaaaagagagatatagcacacaagta
gaccctaacctagcagaccaactaattcatctgtattattttgattgtttttcagaatctgctataagaaatgccatatt
aggacatagagttagccctagttgtgaatatcgagcaggacataacaaggtaggatctctacagtacttggcactagcag
cattaagaacaccaaaaaagataaagccacctttgcctagtgttacgaaactgacagaggatagatggaacaagccccag
aggaccaaggaccacagagggagccatacaatgagtggacactagagcttttagaggagcttaagagtgaagctgttaga
cactttcctagggtgtggcttcatagcttaggacaatacatctatgaaacttatggagatacttgggcaggagtggaagc
cataataagaattctgcaacaactgctgtttattcatttcaggattgggtgtcaacatagcagaataggcattattcaac
ggaggagagcaagaaatggagccagtagatcctagactagagccctggaagcatccaggaagccagcctaaaactgcttg
taccaattgctattgtaaaaagtgttgtcttcattgccaagtttgtttcatgaaaaaaggcttaggcatctcctatggca
ggaagaagcggagacagcgacgaagagctcctcaagacaatcagactgatcaagtttctctaccaaagcagtaagtagta
catgtaatgcaatccttagcaatagcagcaatagtagcattagtagtagtaggaataatagcaatagttgtggggtccat
agtattcatagaatataggaaaatattaagacaaagaaaaatagacaggttaattgatagaataagagaaagagcagaag
acagtggcaatgagagtgaaggagatcaggaagcacttatggagatggggcaccttgttccttgggatgctgatgatctg
tagtgctacagaaaatttatgggtcacagtttattatggggtacctgtgtggaaagaagcaaccaccactctattttgtg
catcagatgctaaagcatatagtaaggaggtacataatgtttgggccacatatgcctgtgtacccacggaccccagccca
caagaaataccattgaaaaatgtgacagaaaattttaacatggggaaaaataacatggtagaacagatgcatgaggatat
aatcagtttatgggatcaaagcctaaagccatgtgtaaagttaaccccactctgtgttactttaaattgcactgatttga
agaaggaggttactagtaccaatactagtagcataaaaatgatggaaatgaaaaactgctctttcaacatcaccacagac
ctgagagataaagtgaaaaaagaatatgcactcttttataaacttgatgtagtacaaatagataatgatagctataggtt
gataagttgtaatacctcagtcgttacacaagcctgtccaaagatatcctttgagccaattcccatacattattgtgccc
cagctggttttgcgattctaaagtgtaacgataaaaagttcaacggaacagggccatgtacaaatgtcagtacagtacaa
tgtacacatggaattaagccagtagtatcaactcaactgctgttaaatggtagtctagcagaagaagaggtagtaattag
atctgtcaatttcacggacaatactaaaaccataatagtacagctgaaagaacctgtggaaattaattgtacaagaccca
acaacaatacaagaaaaggtattcatataggaccagggagagcattttatgcaacaggagacataacaggagatataaga
caagcacattgtaacattagtataacaaaatggaataacacattaaaacagatagttatcaaattaagaaaacaatttgg
gaataaaacaatagtctttaatcaatcctcaggaggggacccagaaattgtaatgcacagttttaattgtggaggggaat
ttttctactgtaatacaacaaaactgtttaatagcacttggaatggtactgaagagttaaataacactgaaggagatata
gtcacactcccatgcagaataaaacaaattataaacatgtggcaggaagtaggaaaagcaaggtatgcccctcccatcgc
aggacaaattagatgttcatcaaatattacaggactgctattaacaagagatggtggtaaccagagcaatgttaccgaga
tttttagaactggaggaggagatatgagggacaattggagaagtgaattatataaatataaagtagttaaaattgaacca
ttaggagtagcacccaccagggcaaagagaagagtggtgcagagagagaaaagagcagtgggaataggagctgtgttcct
tgggttcttgggagcagcaggaagcactatgggcgcggcgtcaataacgctgacggtacaggccagacaattattgtctg
gtatagtgcaacagcagaataatctgctgagggctattgaggcgcaacaacatctgttgcaactcacagtctggggcatc
aagcagctccaggcgagagtcctggctgtggagagatacctaaaggatcaacagctcctggggatttggggttgctctgg
aaaactcatttgcaccactgctgtgccttggaatactagttggagtaataaacctctagatgagatttgaaataacatga
cctggatggagtgggaaagagaaattaataattacacaggtttaatatacaatttaatagaagaatcgcagaaccaacaa
gaaaagaatgaacaagaaatattggcattagataaatgggcaagtttgtggaattggtttgacatatcaaaatggctgtg
gtatataaaaatattcataatgatagtaggaggcttggtaggtttaagaataatttttgctgtactttctatagtgaata
gaggtaggcagggatattcaccattatcatttcagacccgcctcccagcccagaggggacccgacaggcccgaaggaata
gaagaagaagatggagagagagacagagacacatccattcgattagtgaacagattcttagcacttatctgggacgacct
gaggagcctgtgcttcttcatctaccaccacttgagagacttactcttgattgcagcgaggattgtggaacttctgggac
gcagggggtgggaagccctcaaatattggtggaatctcctacagtattggattcaggaactaaagagtagtgctattaat
ctgataggtaccatagcaatagcagtagctgggtggacagatagggttatagaaataggacaaagattttgtagagctat
gcgtaacatacctaggagaatcagacagggcgcagaaaaggctttgcaataacatggggggcaaatggtcaaaaagtagc
atagtgggatggcctcaggttagggaaagaataagacgagctcctgctccagcggcaagaggagtaggaccagtatctca
agatttggataagtatggagcagtcacaagcagtaatacagcagctaataatgctgattgcgcctggctggaggcgcaag
aggaagaggaggtaggctttccagtcaggccgcaggtacctttgagaccgatgacatataagggagctttcgatctcagc
cactttttaaaagaaaaggggggactggatgggttaatttactccaagaaaagacaagaaatccttgatctgtgggtcta
tcacacacaaggctacttccctgattggcagccagggattagattcccactaacatttgggtggtgctacaagctagtac
cagtcgacccagctgaagtagaagaggccacagagggagagaacaacagcctattacaccctatatgccaacacggaatg
gatgatgaggaaaaagaagtgttaatgtggaagtttgacagtcgcctggctctaacacacagagcccgagagctgcatcc
ggagttctacaaagactgctgacacagactgctgacatgaagttgctgacagggactttccgcggggactttccagggga
ggtgtggtttgggcggagttggggagtggctaaccctcagatgctgcatataagcagctgcttttcgcctgtactgggtc
tctctggttagaccagatcgagcctgggagctctctggctagctaaggaacccactgcttaagcctcaataaagcttgcc
ttgagtgc

>04_cpx.CY.1994.94CY032_3
ttgaaagtgaaagttaataggactcgaaagcgaaagttccagagaagttctctcgacgcaggactcggcttgctgaggtg
cacacagcaagaggcgagagcggcgactggtgagtacgccaaattttttgactagcggaggctagaaggagagagatggg
tgcgagagcgtcagtattaagtgggggaaaattagatgcatgggagaggattcggttaaggccagggggaaagaaaaaat
atagactgaaacatctagtatgggcaagcagagagttggaaagattcgcacttaaccctggccttttagaaacagcagaa
ggatgtcaacaattaatggaacagttacaatcaactctcaaaacaggatcagaagaacttagatcattatataatactat
aacaaccctctggtgcgtacatcaaagaatagatgtacaagacaccaaggaagctttagataaaatagaggaaatacaaa
gtaagagcaagcaaaagacacagcaggcagcagctgccgcaggaggtagcagcaatgtcagccaaaattaccctatagtg
caaaatgcacaagggcaaatggtacatcagagcatttcacctagaactttgaatgcatgggtaaaagtaatagaagaaaa
ggctttcagcccagaagtaatacccatgttctcagcattatcagagggagccaccccacaagatttgaacatgatgctaa
atatagtggggggacaccaggcagcaatgcaaatgttaaaagataccatcaatgaggaagctgcagactgggacaggaca
catccagtacatgcagggcctattccaccaggccagatgagagaaccaaggggaagtgatatagcaggaactactagtac
ccttcaagaacaaataggatggatgacaagcaacccacctgtcccagtgggagaaatctataaaagatggataatcttgg
ggttaaataaaatagtaagaacgtatagccccattagcatcttggacataagacaaggaccaaaagaacccttcagagat
tatgtagataggttctttaaatgtctcagagcagaacaagctacccaggaggtgaaaaattggatgacagaaaccctgct
ggtccaaaatgcgaatccagactgtaagtccatcttaaaagcattaggaacaggggctacattagaagaaatgatgacag
catgtcagggagtgggaggacccagccataaagcaagagttttagctgaggcaatgagccaggcatcaaatgcagcagca
gccataatgatgcagaaaagcaaatttaagggccaaagaagaactattaagtgtttcaactgtggcaaggaaggacatct
agccagaaattgcagggcccctaggaaaaagggctgctggaagtgtggaaaggagggacatcaaatgaaagactgcactg
agagacaggctaattttttagggagaatgtggccttccagcaaagggaggccaggaaattttcttcagaacaggccagag
ccaacagccccgcccgcggaatgcttagagaggaaagaggagacaacctcctctctgaagcaggaaccgagggacaagga
actatatcctttaacttccctcaaatcactctttggcagcgaccccttgtcacaataaaactagggggacagataaggga
ggctcttttagatacaggagcagatgatacagtattagaagaaataaatttgccaggaaaatggaagccaaaaatgatag
ggggaatcggaggttttatcaaagtaagacaatatgatcagatacctatagaaatttgtggaaaaaaggccataggcaca
gtgttagtaggacctacacctgtcaacataattggacgaaacatgttgactcagcttggttgtactttaaattttccaat
tagtcctattgaaactgtaccagtaaaattaaagccaggaatggatggcccaaaggttaaacaatggccattgacagaag
aaaaaataaaagccttaacagagatatgtacagacatggaaaaggaaggcaagatttcaaaaattgggcctgaaaatcca
tacaatactccaatatttgctataaagaaaaaagacagcactaaatggagaaaattagtagatttcagagaactcaataa
aagaactcaggacttctgggaagttcagttaggaataccgcacccagcagggttaaagaagaaaaaatcagtaacagtat
tggatgtgggggatgcatatttttcagttcccttagatccagagttcaggaagtacactgcattcaccatacctagtacc
aacaatgagacaccaggaattagatatcagtacaatgtgcttccacagggctggaaaggatcaccagcaatattccaatg
tagcatgacaaaaatcttagagccctttagattcaaaaacccagaaatagtcatataccaatatatggatgatttgtatg
tagggtctgacttagaaatagggcaacatagagcaaaaatagaagagctaagagagcatctattgagatggggattcacc
acaccagacaaaaaacatcagaaagaacccccatttctttggatggggtatgaactccatcctgacaaatggacagtgca
gcctatacaaccggcagaaaaggatagctggactgtcaacgatatccagaagttagtgggaaaactaaattgggcaagtc
agatttatccagggattaaagtaaagcaattatgtaaacttcttaggggagctaaagccctaacagacatagtaccacta
actacagaggcagagttagaattagcagagaacagggagattctaaaagaaccagtacatggggcatattatgacccatc
aaaagacttaatagcagaaatacagaagcaagggcaaggtcaatggacatatcaaatatatcaagagccacataaaaatc
tgaaaacagggaagtatgcaagaaccagatctgcccacactaatgatgttagacaattaacagaagcagtgcaaaagata
gccatggaatgcatagtaatatggggaaagactcctaagtttagattacccatacaaaaggaaacatgggacacatggtg
gacagaatattggcaggccacctggatccctgaatgggaatttgtcaatacccctcctctagtaaaattatggtaccagt
tagaaacagaccccatagcaggagcagaaactttctatgtagatggggcagctaatagagaaacaaaacagggaaaagca
ggatatgttactgatagaggcagacaaaaagttgtctccctatctgaaacaacaaatcagaagactgaattacaagcaat
ttacttagctttgcaggattcaggatcagaagtaaacatagtaacagactcacagtatgcaataggaatcattcaagcac
aaccagatagaagtgaatcagatttagttaatcaaataatagagcagttaatacggaaggacaaggtctacctgtcatgg
gtaccagcacacaaagggattggaggaaatgaacaagtagataaattagtcagcaatggaatcagaaaggtgctattttt
agatggaatagataaggctcaagaagaacatgagaaatatcacaataactggagagcaatggctagtgattttaatctgc
catcagtggtagcaaaagagatagtagctagctgtaataaatgtcagctaaaaggggaagccatgcatggacaagtggac
tgtagtccagggatatggcagttagattgtacacatttagaaggtaaagttatcatggtagcagttcatgtggctagtgg
atacatagaagcagaagttatcccagcagaaacaggacaggaaacagcctacttcatactaaaattagcaggaagatggc
cagtgaaaatgatacatgcagacaacggccccaatttcaccagtgctgcggttaaggcagcctgttggtgggcagatatc
aaccaggaatttggaattccctacaatccccaaagccaaggagtagtggaatctatgaataaagaattaaagaaaatcat
agggcaggtcagggatcaagctgaacaccttaagacagcagtacagatggcagtattcattcacaattttaaaagaaaag
gggggattggggggtacagtgcaggggaaagaataatagacataatagcatcagatatacaaactaaagaactacaaaaa
caaattacaaaaattcaaaattttcgggtttattacagggacagcagagaaccaatttggaagggaccagcaaaactact
ctggaaaggtgaaggggcagtagtaatacaggacaacagtgatatcaaagtagtaccaagaagaaaagcaaagattatta
gggactatggcaaacagatggcaggtaatgattgtgtggcaggtagacaggatgaagattagaacatggaacagtctagt
gaaacatcatatgtatgtttcaaagaaagctaaaggatgattctatagacatcactatgaaagtaggcacccaaaagtaa
gttcagaagtacatatcccactaggggaggctagattagtagtaagaacatattggggtctgcagccaggggaacaagac
tggcacttgggtcatggagtctccatagaatggaggctcagaagatatagcacacaagtggatcctgacctggcagacca
actaattcatatgcattactttgattgtttttcagaatctgccataaggaaagccatattaggacatagagttagtccta
ggtgtgaatatcaagcaggacataataaggtaggatccttacaatacctggcactagcagcattaatatccccaaaaaag
acaaagccacctttgcctagtgttaagaaactagtggaggatagatggaacaagccccagaagaccaggggccgcagaga
gaaccaaataatgaatggacactagagcttttggaggagcttaaaaatgaagctgttaggcattttcctagaccctggct
ccatggcctaggacagcatatctataacacttatggagatacctgggaaggggttgaagctataataagaattttgcaac
aactactgtttattcatttcagaattgggtgccaacatagtagaataggcattactcctcaaaggagaagaggcagggga
tggagccagtagatcctgacctagagccctggaaccatccgggaagtcagcctacaactgattgtaacaagtgtttctgt
aaaaagtgttgctggcattgccaagtttgctttctgaaaaaaggcttaggcatctcctatggcaggaagaagcggaaaca
tcgacgaggatctcttcaaggcagcaagggccatcaaaatcttataccaaagcagtaagtattaagtatatgtaatgtta
ttctgggaaatctgggcaatagtaggactggtagtagcgctaattatagtaatagtagtgtggactttagtatttataga
atataagaaattgagaaggcaaaggagaatagacagcttgtacaatagaataagagaaagagcagaagacagtggcaatg
agagtgatggggatgcagaggaattatccacacttgtgggaatggggaactttgatccttgggttggtgataatctgtag
tgcctcaaacaacttgtgggtcacagtttattatggggtacctgtgtggagagacgcagagaccaccctattttgtgcat
cagaagctaaagcatatgagaaagaagtacataatatctgggctacacatgcctgtgtacccacagaccccaacccacaa
gaagtagctctgataaatgtaacagagaactttaacatgtggaaaaatgacatggtagaacagatgcatgaggatataat
cagtttatggaatgaaggcctaaaaccatgtgcaaagctaacctctctctgtgttacttttacatgtattaatgcaacta
ctactaatagtaccaatggcactgtgattaaagaaggaataaaaaactgctctttcgatataaccacagaaataagggat
aagaagaagaaagaatatgcgcttttctatagaattgatatagtgccaattaatgctagagtgccaattaatggtagtaa
taggaataatagtacagaagagtatatgttaataaattgtaacgcctcaaccattaaacaggcttgcccaaaggtgtctt
ttgagccaattcccatacattattgtgccccagctggttttgcaattttaaagtgtaatgagaaaaatttcactggatta
gggccatgcacaaatgtcagctcggtacgatgcactcatggaattaagccagtggtatcaactcaattgctgttaaatgg
aagcttagcaacggaagaggtagtaattagatctaaaaatatcacagacaataccaaaaatataatagtacagcttgcaa
aggctgtaaaaattaattgtaccagacctggcaacaatacaagaaaaagtgtacatatagggccaggactaacatggtat
gcaacaggtgaaataataggagatataagacaagcacattgtaacattagtggaaatgattggaatgacaccttaaaagt
gataagtgaagaattgaaaagactcttccctaataaaacaataaaatttgctccacccgtaggaggggacctagaaatta
caacacatagctttaattgtaaaggagaatttttctattgcaatacaacaccactgtttaatagtacacacatgcaaaat
ggtacaaacattacaagtacagattctacaaattcaaccatcacactccaatgcagactaaaacaatttgtaaggatgtg
gcaggaagtggggcaagcaatgtacgcctcccccattgcagggagcattaactgcagctcagatattacaggaataatat
tgacaagagatggtggtactaataatactgagatcttcagacctggaggaggagacatgagggacaattggagaagtgaa
ctatataaatataaagtagtaaagattgaaccaataggagtagcacccaataaggcaaggagacgagtggtgcagagaga
aaaatgagcagtgggaataggggccatgttccttgggttcttgggagcagcaggaagcactatgggcgcagcgtcaatga
cgctgacggtacaggccagacaattattgtccggcatagtgcagcagcagagcaatttgctgagggctatagaggctcaa
caacatctgttgagactcacggtctggggcattaaacagctccaggcaagagtcctggctctggaaagctacctaaagga
tcaacagctcctaggaatttggggctgctctggaaaactcatctgcaccactaatgtaccttggaactctagttggagta
ataaatcttataatgatatatgggacaatatgacctggttgcaatgggataaagaaattaacaattacacacaaataata
tatgggttacttgaagaatcacagaaccagcaggaaaagaatgagcaagacttattggccttggacaagtgggcaagcct
gtggaattggtttagcataacaaaatggctatggtatataaaaatatttataatgatagtaggaggcttgataggcttaa
gaataatttttgctgtgctttctatagtaaatagagttaggcagggatactcacctttgtctttgcagacccttatccca
acaacccaacggggactcgacaggcccggaggaacagaagaagaaggtggcgagcaagacagaagcagatccattcgctt
agtgaacggattcttgccacttatctgggacgacctgcggaacctgtgcctcttcagctaccgccacttgagaaacttac
tcttaattgtagcgaggactgtggaacttctggggataagggggtgggaagccctcaagtatctgtggaacttcctgctg
tattggggacaggagctaaagaatagtgctattaatttgtttaataccacagcaatagcagtagctgagggaacagatag
gattatagaagcagtacagagagcttgtagagctatttgcaacatacctagaagaatcagacagggccttgaaagagctt
tgctttaaaatgggaggcaaatggtcaaaaagtagcatagttggatggcctgagataagggaaagaatgaggcgagctcg
agctgagccagaaagaatgaggcgagctcaagctgagccagcagcagcaggagtaggagcagtgtctcaagacttggaca
aacatggggcaatcacaattaacaatacagcagctactaatcctgacaaaacctggctggaagcacaagaagaggaagaa
gaggtaggttttccagtcaggccacaggtacctttaaggccaatgacctttaaaggagctttagatctcagccacttttt
aaaagaaaaggggggactggatgggctaatttactccaagaaaagacaagagatccttgatctgtgggtctatcacacac
aaggtttcttccctgattgggataactacacaccaggaccaggggagagattcccactgtgctttggatggtgcttcaag
ctagtaccagtagatccacaggaggtggaagaggccactgaaggagagaacacctgtttgctgcaccctataagccagca
tggaatggaggatgaagagagagaagtattaaagtggaagtttgacagtcgcctggcatacaagcacgtagcccgagagc
tgcatccggagttttacaaagactgctgacacagaagttgctgacaaagggactttccgcccgggactttccaggggagg
cgcggcctgggaggggttggggagtggctaaccctcagatgctgcataaaagcagccgcttctcgcctgtactgggtctc
tctggttagaccagatctgagcctgggagctctctggctagctagggaacccactgcttaagcctcaataaagcttgcct
tgagtgcttc

>05_DF.BE.-.VI1310 AF193253
atctctagcagtggcgcccgaacagggacttgaaaacgaaagtagaaccagagaagaactctcgacgcaggactcggctt
gctgaagcgcgcaaggcaagaggcgaggggtagcgactggtgagtacgctaaaatttttgactagcggaggctagaagga
gagagatgggtgcgagagcgtcagtattaagcgggggaaaattagatgcatgggaaaaaattcggttacggccaggagga
aagaaaaagtatagactaaaacatttagtatgggcaagcagggagctagaacgatttgcacttaatcctggccttttaga
gacatcagaaggctgtaaacaaataataagccagttacaaccagctattcagacaggaacagaagaacttaaatcattat
acaatacagtagcaaccctctattgtgtccatgaaaggatagaggtgaaagacaccaaggaagctttagaaaagatagag
gaagagcaaaacaaaagtaaaagaaaaaaggcacagcaagcagaagctggcgcagggaacagcagccaggccagccaaaa
ttatcctatagtgcagaacatacaggggcaaatggtacaccaggccctatcacctagaactttgaacgcatgggtaaaag
taatagaagaaaaggctttcagcccagaagtaatacccatgttttcagcattatcggagggagccaccccacaagattta
aacaccatgctaaacacagtggggggacaccaagcagccatgcaaatgttaaaagagactatcaatgaggaagctgcaga
atgggataggttacatccagtgcaggcagggcctgtggcaccaggccaaatgagagatccaaggggaagtgatatagcag
gaactaccagcacccttcaggaacaaatagcatggatgacaaacaacccacctattccagtaggagaaatctataaaaga
tggataattctgggattaaataaaatagtaagaatgtatagccctgtcagcattttggatataagacagggaccaaagga
accttttagagactatgtagaccggttctataaaactctaagagccgagcaagctacacaggaagtaaaaaactggatga
cagaaaccttgttggtccaaaatgcaaacccagattgtaaaactatcttaaaagcattaggacaacaggctacactagaa
gaaatgatgacagcatgtcagggagtgggggggcccagccataaagcaagagttttggctgaggcaatgagccaagcaac
aaattcagctgctacagcaatgatgcagagaggcaattttaagggcccaagaaaaattattaagtgtttcaactgtggta
aagaagggcacatagccaaaaattgtagggctcctggaaaaaagggctgttggaaatgtgggagagaaggacaccaaatg
aaagactgcactgagaggcaggctaattttttagggaaagtttggccttcccacaaggggaggccagggaacttcctcca
gagcagaccggagccctcagccccgccagcagagagcttcaggtttggggaggagatagcctcctctccgaagcaggagc
agaaggacgagggactgtaccctcccttagcttccctcaaatcactctttggcaacgacccgttgtcacaataaggatag
gggggcagctaaaggaagctctattagatacaggggcagatgatacagtattagaagacataaatttgccaggaaaatgg
aaaccaaaaatgatagggggaattggaggttttatcaaagtaagacagtatgatcagatacttgtagaaatctgtggaca
gaaagctataggtacagtattagtaggacctacacctgtcaacataattggaagaaatttgttgacccagattggctgca
ctttaaattttccaattagccctattgaaactgtaccagtaaaattaaagccaggaatggatggcccaaaagttaaacaa
tggccattaacagaagaaaaaataaaagcattaacagaaatttgtacagatatggaaaaggaaggaaaaatctcaagaat
tgggcctgaaaacccatacaatactccaatatttgccataaagaaaaaggacagtactaggtggagaaaattagtagatt
tcagagaacttaataagagaactcaagatttttgggaagttcaattaggaataccacacccggcagggttaaaaaagaaa
aagtcaataacagtactggatgtgggggatgcatatttttcagttcccttagataaggaattcaggaagtacactgcatt
caccatacctagtatcaacaatgagacaccaggaatcagataccagtacaatgtgcttccacaaggatggaaaggatcac
cagcaatattccaatgtagcatgacaaaaatcttagagccctttagaaaacaaaatccagaagtagttatctaccaatac
atggatgatttgtatgtaggatctgacttagaaataggacaacatagggcaaaaataaaggagttaagagaacatctact
ggcatgggggtttactacaccagacaaaaaacatcagaaagaacctccattcctttggatggggtatgaactccatcctg
ataaatggacagtgcagcctatacaattgccagacaaggacagctggactgtcaatgatatacagaagttagtaggaaaa
ctaaattgggcaagtcagatttatccagggattaaagtaaagcaattatgtaaactccttaggggaaccaaagcactaac
agaggtaataccactaacagaagaagcagaattagaactggcagaaaacagggaaattctaaaagaaccagtacatgggg
tgtattatgacccatcaaaagacttaatagcagaagtacagaaacaagggctagggcaatggacatatcaaatttatcaa
gaaccatttaagaatctaaaaacaggaaagtatgcaagggcgaggggtgtccacactaatgatgtaaaacaattagcaga
ggcagtgcaaaaaatagcaacagaaagcatagtgatatggggaaagactcctaaatttagactacccatacaaaaggaaa
catgggaaatatggtggacagagtattggcaagccacctggattcctgagtgggaatttgttaatacccctcctttagta
aaattatggtaccagttagagaaggaacccatattaggagcagaaactttctatgtagatggggcagctaatagagagac
taaattaggaaaagcaggatatattactgataaaggaagacaaaaagctgtctccctaactgagacgacaaatcagaaag
ctgagttacaagcaattcacctagctttgcaagattcaggattagaagtgaatatagtaacagactcacagtacgcatta
ggaatcattcaagcacaaccagataagagtgaatcagagttagtcaatcaaataatagagcaattaatagaaaagaaaaa
ggtctatctgtcatgggtaccagcacacaaagggattggaggaaatgaacaagtagataaattagtcagtgctggaatta
gaaaagtactatttttggatggaatagataaagctcaggatgaacatgagaaatatcatagcaattggagagcaatggct
agtgattttaatctgccacctgtagtagcaaaagaaatagtagctagctgtgataagtgtcagttaaaaggagaagccat
gcatggacaagtagactgtagtccaggaatatggcaattagattgtacacatttagaagggaaagttatcctagtagcag
ttcatgtagccagtggctatatagaagcagaagttattccagcagagacaggacaggacacagcctacttcatattaaag
ctggcaggaagatggccagtaaaaatgatacatacagataatggccccaatttcaccagtggtgcggttaaggcagcctg
ttggtgggcaggtatccagcaagaatttggaattccctacaatccccaaagtcaaggagtagtagagtctatgaataaag
agttaaagaaaatcataggacaggtaagagatcaagctgaacatcttaagacagcagtacaaatgacagtattcatccac
aattttaaaagaaaaggggggattggggggtacggtgcaggggaaagaataatagacataataacaacagacatacaaac
taaagaattacaaaaacaaatcataaaaattcaaaattttcgggtttattacagggacagcagagacccagtttggaaag
gaccagcaaagctactctggaaaggtgagggagcagtagtcatacaagacaatagtgaaataaaggtagtaccaagaaga
aaagcaaagatcattagggattatggaaaacagatggcaggtgatgattgtgtggcaggtagacaggatgaggattaaca
catggaaaagtttagtaaaataccatatgcatgtttcaaagaaagctaacagatggtgttatagacatcactttgaaagt
agaaatccaagaataagttcagaagtacacatcccactaggagacgctaaactggtagtaacaacatattggggtctaca
tacaggagaaagagactggcatttgggtcagggagtctccatagagtggaggaaaaggagatatagcacacaagtagacc
ctagcctggcagaccaactaattcatgtgtattattttgattgtttttcagaatctgccataagaaatgccatattagga
cgtatagttagtcctaggtgtgagtttcaagcaggacataacaaggtaggatccttacagtatttggcactaacagcatt
aataacaccaaaaaagacaaagccacctttgcccagtgttaggaagctaacagaagacagatggaacaagccccagaaga
ccaagggccgcagagggaaccatacaatgaatggatactagagcttttagaggagcttaaacatgaagctgttagacatt
ttcctaggccatggctccatagcttagggcagtatatctataacacctatggggatacttgggagggagttgaagctata
gtaaggatattacaacagctactgtttatccatttcagaattgggtgccgccatagcaggataggcattcttcgacagag
aagaataagaaatggatccagtagatcctaacctagagccctggaatcatccaggaagtcagcctaggactgcttgtaac
cagtgctattgtaaaatgtgttgctatcattgccaaaattgcttcataacgaaaggcttaggcatctcctatggcaggaa
gaagcggagaccgcgacgaagacctcctcaaggcagtcaggctcatcaagatcctgtaccagagcagtaagtagtgataa
gtagtctatgtaatgtcagatctgctaacaatagcagtagtagcattaatagtagcactaataatagcaatagttgtgtg
gattatagtatatatagaatataagaaattggtaaggcaaagaaaaataaataggttatataaaagaataagagaaagag
cagaagacagtggcaatgagagtgagggggatgcagaggaattggccgcacttggggaagtggggccttttattcctggg
gatattaataatctgtagtgctacagacaaattttgggtcacagtctattatggggtacctgtatggagagaagcaaaaa
ctaccctgttttgtgcatcagatgctaaaggatatgacaaagaggtacataatgtctgggctacacatgcttgtgtaccc
acagaccccaacccacaagaagtagttctgggaaatgtaacagaaaattttaatatgtggaaaaatgacatggtagaaca
aatgcatacagatataattagtttatgggatcaaagcttaaagccatgtgtaaagttaaccccactctgtgttactctaa
actgtactgatttcaaggccaattccactgccaattccaccaccaactccactaccctgaaagaagagacaggggcagta
caaaactgttctttcaatatgactacagaagtaaatgacaaaaagctgaaagtacatgcactcttttatagacttgatat
agtaccaatcagtagcgatgacagtagcaatagcagttataggctaataaattgtaatacctcaaccattaaacaggctt
gtccaaaggtatcttgggatccaattcccatacattattgtgctccagctggttatgcgattctaaagtgtaatgagaaa
aagttcagtgggacaggaccatgcaagaatgtcagcacagtacaatgcacacatggaattaagccagtggtatcaactca
gttgctgttaaatggcagcctagcaaaagaaggtataataatcagatctcaaaatatctcagataatgcaaaaaacataa
tagtacaccttaatgaatctgtacatattaattgtacaaggcccaacaacaatacaagaaaaagtatacatttaggacca
ggacaagcattctatgcaacaggtgacataataggagacataagaaaggcacattgtaacgttagtagggaacaatggaa
taaaaccttaatccaggtagcgaaagagttacagtctcacttccctaataaaacaataaaatttaactcatcctcaggag
gggacctagaaattacaatgcatagttttaattgtagaggagaatttttctactgcgatacatcaaaattgtttaatgcc
acagtgtttaatgatacagtgtttaatgccacaatgtttaataatgacagtgacaagaatatcattctcccatgtaaaat
aaaacaaatagtaagaatgtggcagggagtaggacaagcaatgtatgccgctcccattgcaggaaacattgcctgtaact
caactattacagggatactattggcaagagatggtggaaatggtaatgatagctccaacgacacagagatattcagacct
ggaggaggagatatgagagacaattggagaagtgaactatataaatataaagtagtagagattcaaccactaggaatagc
acccaccagggcaaaaagacaagtggtgaagagagaaaaaagagcaatgggaataggagctatgttccttgggttcttgg
cagcagcaggaagcactatgggcgcggcgtcaatagcgctgacggtacaggccagacaattattgtctggaatagtgcaa
cagcaaaacaatttgctgcaggctattgaagcgcaacagcatctgttgcagctcacagtctggggtattaaacagctcca
ggcaagagtcctggctgtggaaagatacctaaaggatcaacagctcctagggctttggggcagctctggaaaacacatct
gctccactagtgtgccctggaactctagttggagtaataaatctgagggggagatttgggacaacatgacctggatggag
tgggaaaaagagattagcaattactcaagcacaatatacaggttaattgaacagtcgcagatccagcaggaaaagaatga
acaagaattattgtcattagaccagtgggcaagcctgtggaattggtttgacataacaaaatggctatggtatataaaaa
tattcataatgatagtaggaggcttgataggcttaagaatagtttttactgtgctttccatagtgaatagagttaggaag
ggatactcacctctgtcatttcagacccccttcccagccccgaggggacccgacaggcccgaagaaacagaagaaggagg
tggagagcaagacagaggcagatcaattcgattggtgaacggcttctcagcacttatctgggacgatctgaggaacctgt
gcctcttcagctaccaccacttgagagacttaaccttaattgtagtgaggattgtggaacttctgggacgcagggggtgg
gaagccctcaaatatctgtggagcctcccgcaatattggagtcgggaactaaagaatagtgctattagcttgcttaatac
cacagcagtagtagtagctgaggggacagatagagttatagaagctttgcaaagagctggtagagctattctcaacatac
ctagaagaataagacagggcttagaaagggctttgctataaaatgggtggcaagtggtcaaaaagtagtgtagttggatg
gcctgctataagggaaaaaatgagacgcacccctccagcagcagaaggggtgggagcagtgtttcaagacttagacaatc
ggggggcagttacaatcagaaatacagtagccactaatcctgatatggcctgggtagaagcacaagaggaggaggaggaa
gtaggctttccagtcaaacctcaggtacctttaagaccaatgacttataaggcagctgtagatctcagtcactttttaaa
agaaaaggggggactggaagggttaatttactccaagaaaagacaagatatccttgatctttgggtctacaacacacaag
gttactcccctgattggcagaactacacaccagggccagggattagatatccactgaccttgggttggtgcttcaagtta
gtaccagttaatccagaggaggtagagaaggccaatgaaggagaggacaactgcttgctacaccccatgagcctgcatgg
aatggaggatgatgacagagaagtactgcagtggaagtttgacagcagcctggcattaagacacatagccagagagagac
atccagagttctaccaagactgagactgctgacacagaaactgctgacacaggaagtgctgacacagaagctttctacaa
gggactttccgctggggactttccggggaggcgtggactgggcgggactggggagtggctgaccctcagatgctgcatat
aagcagctgcttttcgcttgtactgggtctctctagttagaccagatttgagcctgggagctctctggctagctagggaa
cccactgcttaagctcaataaagcttgccttgagggcgcatgc

>06_cpx.AU.1996.BFP90
tggatgggctaatttactccaagaaaagacaggagatccttgatctgtgggtctatcacacacaaggtttcttccctgat
tggcaaaactacacaccagggccagggcccagatacccattgacttttggatggtgctacaagctagtaccagttgatcc
agaggaggtagaagaacttactaaaggagagaacaactgcctgttacaccccatatgccagcatggagcagaggatgaag
aaagagaagtgttaaagtggaagtttgacagctccctagcaaggagacacatagcccgagagaaacatccggagttttac
aaagactgctgacaaggctgctgacaaagaagtttctaatggggactttccgctggggactttccagggaggtgtggcct
gggcggggctggggagtggctaaccctcagatgctgcataaaagcagccgcttctcgcttgtactgggtctctcttgcta
gaccagatttgagcctgggagctctctgactagcaggggaacccactgcttaagcctcaataaagcttgccttgagtgct
tatagtagtgtgtgcccgtctgttgtgtgactctggtaactagagatccctcagaccactctagacagtgtaaaaatctc
tagcagtggcgcccgaacagggacttgaaagcgaaagttaatagggactcgaaagcgaaagttccagagaagttctctcg
acgcaggactcggcttgctgaggtgcacacagcaagaggcgagagcggcgactggtgagtacgccatttttgactagcag
aggctagaaggagagagatgggtgcgagagcgtcagtattaagtgggggaaaattagatgaatgggaaaaaattcggtta
cggccagggggaaagaaaaaatataaaatgaaacacctagtatgggcaagcagggagctggaaagattcgcaattaaccc
tggccttttagaaacagcagaaggatgtcaacagataatagagcagttacaatcaactctcaagacaggatcagaagaac
ttaaatcattatttaatacagtagcaaccctctattgtgtacatcaaaggataaaagtaacagacaccaaggaagccata
gataaaatagaggaaatacaaaagaagagcaagcaaaaggcacatcaggcagctgccacaggaaacagcagtaatctcag
tcaaaattaccccatagtgcaaaatgcacaagggcaaatggtacatcaggccatgtcaccacgaactttaaatgcatggg
tgaaagtaatagaagataaggctttcagcccagaagtaatacccatgttcacagcattatcagaaggagccaccccacaa
gatttaaacatgatgctgaacatagtggggggacaccaggcagctatgcaaatgttaaaagataccatcaatgaggaagc
tgcagaatgggacagggtacatccagtacatgcaggacctattccaccaggccagataagagaaccaaggggaagtgata
tagcaggaactactagtacccttcaggaacaaataggatggatgacaagcaacccacctatcccagtgggagaaatctat
aaaagatggataatcctaggattaaataaaatagtaagaatgtatagccctgttggcattttggacataaaacaaggacc
aaaagaacccttcagggattatgtagataggttctttaaaactctaagagctgagcaagctacacaggaagtaaaaaatt
ggatgacagacaccttgttggtccaaaatgcaaacccagattgtaagaccattttaagagcattaggaccaggagctaca
ctagaagaaatgatgacagcatgtcagggagtgggaggacctggccataaggcaagagttttagctgaggcaatgagcca
ggcatcagttggagccataatgatgcagaaaagcaattttaagggcccgaaaagaagtattaagtgcttcaactgtggca
aggaaggacatctagccagaaattgcagggcccctagaaaaaagggctgttggaaatgtggaaaggagggacatcaaatg
aaagattgtacagagagacaggctaattttttagggaaaatctggccttccaacaaggggaggccagggaattttcttca
gaacaggccagagccaacagccccacccatagagagcttcggtttcggagaggagatagccccctccccgaaacaggagt
cgaaggagaaggaggaaaaggggctatatcccttagcctccctcaaatcactctttggcagcgacccctagtcacagtaa
gaatagggggacagctaatagaagccctattagacacaggagcagatgatacagtattagaagacataaatttaccagga
aaatggaaaccaaaaatgatagggggaattggaggttttatcaaagtaaaacagtatgatcaaatacttatagagatttg
tggaaaaaaggctataggtacagtattagtaggacctacacctatcaacataattggacgaaacatgttgacccagattg
gttgtactttaaattttccaattagtcctattgaaactgtaccagtaaaactaaagccagggatggatggcccaaaggtt
aaacaatggccattgacagaagagaagataaaagcattaacagaaatttgtaaagaaatggaaaaagaaggaaaaatttc
aaaaattgggcctgaaaatccatacaatactccagtatttgctataaagaaaaaagatagtactaaatggagaaaattag
tagatttcagagaacttaataaaaggactcaagacttttgggaagttcaattaggaataccacatcctgctgggttgaag
aagaaaaaatcagtaacagtattggatgtgggggatgcatatttttcaattcccctagatgaaaaatttagaaagtatac
tgcattcactatacctagtacaaataatgaaacaccagggattagatatcagtacaatgtacttccacagggatggaaag
gatcaccagcaatatttcagagtagcatgataaaaatcttagagccctttagaataaaaaacccagaaatagtgatctac
caatacatggatgatttatatgtagggtctgacttagaaatagggcaacatagagcaaaaatagaggagttaagagagca
tctattgaaatggggacttaccacaccagataaaaaacatcagaaagaacccccatttctttggatggggtatgaactcc
atcctgacaaatggacagtgcagcctatacaactcccagacaaggagagctggactgtcaatgatatacagaaattggtg
ggaaaactaaattgggcaagtcagatttatccagggattaaagtaaggcaattatgtaaactcctcaggggagcaaaagc
actaacagacatagtaccactaactgcagaagcagaactagaattggcagagaacagggaaattttaaaagaaccagtac
atggggtatattatgacccatcgaaagacttaatagcagaagtacagaagcaggggtacggccaatggacataccaaata
tatcaggagccacataaaaacctgaaaacagggaagtatgcaagaataaagtctgcccacactaatgatgtaaaacaatt
aacagaagcagtgcaaaaaatagccctagaaagcatagtaatatggggtaagactcctaaatttagactacccatacaaa
aagaaacatgggagacatggtggacagaatattggcaagccacctggatccctgaatgggaatttgtcaatacccctccc
ctagtgaaactatggtaccagttagaaacagagcccatagtaggagcagaaactttctatgtagatggggcggctaatag
agaaactaagcaaggaaaagcaggatatgttactgacagaggaagacaaaaggttgttaccctaactgaaacaacaaatc
agaagacggaattacaagcaattaatctagcattacaggattcaggaccagaagtaaacatagtaacagactcacagtat
gcattaggaatcattcaagcacaaccagataaaagtgaatcagaactagtcaaccaaataatagaacagctaataaaaaa
ggaaaaaatctacctgtcatgggtaccagcacacaaagggattggaggaaatgaacaagtagataaattagtcagtaatg
gaatcaggaaggtactatttttagatggcatagataaagcccaggaagatcatgaaagatatcacagcaattggagagcc
atggctaatgattttaatctgccacctatagtagcaaaagaaatagtggccagctgtgacaaatgtcagctaaaagggga
agccatacatggacaagtagattgtagtccagggatatggcaattagattgcacacacctagaaggaaaaataatcctgg
tagcagtccatgtagccagtggctatatagaagcagaagttatcccagcagaaacaggacaggagacagcatactttata
ttaaaattagcaggaagatggccagtaaaagtgatacacacagacaatggtagcaatttcaccagtgctgcagttaaagc
agcctgttggtgggcaaatatcacacaagaatttggaattccttacaatccccaaagtcaaggagtagtggaatctatga
ataaagaattaaagaaaatcatagggcaggtaagagaacaagctgaacaccttaagacagcagtacaaatggcagtattc
attcacaattttaaaagaaaaggggggattggggggtacagtgcaggggaaagaataatagacataatagcatcagatat
acaaactaaagaactacaaaaacaaattataaaaattcaaaattttcgggtttattacagggacagcagagacccaattt
ggaaaggaccagcaaaactactctggaaaggtgaaggggcagtagtaatacaagacaatagtgaaataaaggtagtacca
agaagaaaagcaaagatcattagagattatggaaaacagatggcaggtgatgattgtgtggcaggtagacaggatgagga
ttaatacatggaaaagtttagtaaaataccatatgcatatttcaaagaaagctaaaagatggaattatagacatcactat
gacagcaatcatccaaaaataagttcagaagtacacataccattaggaagtgctgaattagtaataacaacatattgggg
tctaaatacaggagaaagaaaatggcacttgggccagggagtctccatagaatggaggttgagaagatatagaacacaag
tagaccctagtatggcagaccaactaattcatatacattactttgattgtttttcagaatctgctatcaggaaagcctta
ttaggacatagagttagccctaggtgtgattatcaagcaggacataacaaggtaggatctctacaatatctggcactaac
agctttaataaaaccagagaagagaaaaccacctttgcctagtgttcaaaagctagtagaggatagatggaacaagcccc
agaagaccaggggccacagagagagccatacaatgaatggacactagaacttttggaggagctgaaaagtgaagctgtta
gacattttcctagaccatggctccataacatagggcagtatatttatagcacttatggggatacttgggaaggagttgaa
gctctattaagaacactgcaactactactgtttgtccatttcagaatcgggtgccaccatagcaggataggcattatacc
acagagaagagggagaaatggagccagtagatcctaaaatagagccctggaatcagccaggaagtcggcctaagactgct
tgtaccaaatgctattgtaaaaagtgttgctatcattgcccagtgtgctttctaaacaagggcttaggcatttcctatgg
caggaagaagcggagacagcgacgacaggctcctcctggcagtaagaatcatcaagatcctgtatcaaagcagtaagtaa
taataattagctaactggtaatgcaggcattagagatagctgcaatagtaggactagtagtagcattcttagcagccata
gttgtgtggactatagtatttatacaatatagggaaataagaaaacagaaaaaaatagaaaagttacttgatagaataag
agaaagagcagaagacagtggaaatgagagtgaaggggatacagacgagttggcaacacttatggaaatgggggactttg
atccttgggttggtgataatttgtagtgcctctaagaacatgtgggttacagtctattatggggtgcctgcgtgggaaga
tgcagataccattctattttgtgcatctgatgctaaagcatatagtcctgataagcataatgtctgggcaacacatgctt
gtgtacccacagaccccaacccacaagaaatatctctgaaaaatgtaacagaaaattttaatatgtggaaaaataacatg
gtagaccagatgcatgaggatataatcagtttatgggatgaaagtctaaagccatgtgtaaagctaacccctctctgcgt
tactttaacatgtactaatgctacattaggtaacaaaacattaggtaacaatagtactaatagtacattaggtaacaata
gtactatagtagatgatatcagcaaggaaataaaaaactgctctttcaatataaccacagaaataagagataagacaaag
aaagaatatgcgcttttctatagacctgatatagtaccaattggggatgatagtaataatagtgattatagattaataaa
ttgtaatgtctcaaccattaaacaggcttgtccaaaggtgtcttttgaaccaatccccatacattattgtgctccagctg
gttttgcgattttaaagtgtagggataaggatttcaatggaacaggaccatgtaaaaatgtcagtacagtacaatgtaca
catgggattaagccagtggtatcaactcaattactgctgaatggcagtttagcagaaggaaacataacaattaaaactga
aaacatcacagacaataccaaaaatataatagtgcagcttaatcagcctgtagaaattaggtgtaccagacccggtaaca
atacaagaaaaagtatatcctttggaccaggacaagcgttcattgcaacaggtgacataataggagatataagacaagct
cattgtaatgttagtagagcaaattggacagatatactaggagaagtgaaggtaaaactagaagaagtttttaataacac
acacataacctttaagtcatctgcaggaggggacctagaaattacaacacatagttttaattgtggaggagaattcttct
attgtaatacatcaaacctgtttaatacatcagacctgtttaacacctcaaggggtaatgacaccaacaccactatcaca
ctcccatgtaagataaaacaaattgtaagaatgtggcagagagtgggacaagcaatgtatgcccctcccattgcaggaaa
cattacatgtgtatcaaacattacaggaataatattaacaagagatgggaataatgagaatgtcagtgaaaccttcagac
ctggaggaggagatatgagggacaattggagaagtgaactgtataagtataaagtagtaaaaattaaaccactaggaata
gcacccacctgggcaaggagaagagtagtggggagagaaaaaagagcagttggactgggagctatgttccttgggttctt
aggaacagcaggaagcactatgggcgcagcgtcaataacgctgacggtacaggtcagacaattattgtctggcatagtgc
aacagcaaagcaatttgctgagagctatagaggcgcagcagcatctgttgcaactcacagtctggggcattaaacagctc
caggcaagaatcctggctgtggaaagatacctaaaggatcaacagctcctaggaatttggggctgctctggaaaactcat
ctgtcccactaatgtgctctggaacactagttggagtaataaaacttatgatgaaatttggggtaacatgacctggatag
aatgggatagggaaattaacaattacacacaacaaatatactccctaattgaactatcgcaaactcagcaggaaaagaat
gaacaagacttattggcattggacaagtgggcaaatctgtggtcttggtttgacataacaaactggttatggtacataaa
aatatttataatgatagtaggaggcttaataggtttaagaatagtttttgctgtgatttctatagtcaatagagttaggc
agggatactcacctttgtcgttgcagacccttatcccaaacccaacgggagcagacaggcccggagaaatcgaagaagga
ggtggagagcaaggcagaaccagatcgattcgattagtgaacgggttcttagcacttgcctgggacgatctgcggagcct
gtgcctcttcagttaccaccgattgagagacttcggcttgattgcagcgaggactgtggaaattctgggacgcagggggt
gggaaatcctcaaatatctggggaacctgatatgttattggggacaggaactacagaatagtgctattagtttatttgat
gcagcagcaatagcagtagctaactggacagatagggttgcagaagtagtacaaagaatttttagagcttttcttaacgt
acctagaagaataagacaaggatttgaaagagctttgctataaaatgggaaacaaatggtcaaaaggatggtctcaggta
agggaaaggatgagacgaaccccaccaacagaaagagcagcagaaggagtaggagcagtgtctcaagatttggataagca
tggggcaatcacaagcagcaatacagcaactacaaatgctgcctgtgcctgggtggaagcacaaacagaggaagaggtag
gctttccagtcagacctcaggtacctgtgagaccaatgacttataaagctgcttttgatctcagcttctttttaaaagaa
aaggggggactggatgggctaatttactccaagaaaagacaggagatccttgatctgtgggtctataacacacaaggttt
cttccctgattggcaaaactacacaccagggccagggaccagattcccactgacttttggatggtgctacaagctagtac
cagttgatccagaggaagtagaagaacttactaaaggagagaacaactgcctgttacaccccatatgccagcatggagca
gaggatgaagaaagagaagtgttaaagtggaagtttgacagctccctagcaaggagacacatagccagagagaaacatcc
ggagttttacaaagactgctgacaaggctgctgacaaagaagtttctaatggggactttccgctggggactttccaggga
ggtgtggcctgggcggggctggggagtggctaaccctcagatgctgcataaaagcagccgcttctcgcttgtactgggtc
tctcttgctagaccagatttgagcctgggagctctctgactagcaggggaacccactgcttaagcctcaataaagcttgc
cttgagtgcttatagtagtgtgtgcccgtctgttgtgtgactctggtaactagagatccctcagaccactctagacagtg
taaaaatctctagca

>07_BC.CN.1997.CN54
aatctctagcagtggcgcccgaacagggacttgaaagcgaaagtaagaccagaggagatctctcgacgcaggactcggct
tgctgaagtgcactcggcaagaggcgagagcggcgactggtgagtacgccaattatatttgactagcggaggctagaagg
agagagatgggtgcgagagcgtcaatattaagagggggaaaattagataaatgggaaaaaattaggttaaggccaggggg
aaagaaacactatatgctaaaacacctagtatgggcaagcagggagctggaaagatttgcacttaaccctggccttttag
agacatcagaaggctgtaaacaaataatgaaacagctacaatcagctcttcagacaggaacagaggaacttagatcatta
ttcaacacagtagcaactccctattgtgtacatacagagatagatgtacgagacaccagagaagccttagacaagataga
ggaagaacaaaacaaaattcagcaaaaaacacagcaggcaaaggaggctgacgggaaggtcagtcaaaattatcctatag
tacagaatctccaagggcaaatggtacatcagcccatatcacctagaactttaaatgcatgggtaaaagtggtagaagag
aaggcttttagcccagaagtaatacccatgttttcagcgttatcagaaggagccaccccacaagatttaaacaccatgct
aaacacagtggggggacatcaagcagctatgcaaatattaaaagataccatcaatgaagaggctgcagaatgggatagat
tacatccagtacatgcagggcctattgcaccaggccaaatgagagaaccaaggggaagtgacatagcaggaactactagt
aacctacaggaacaaatagcatggatgacgagtaacccacctgttccagtaggagacatctataaaagatggataattct
gggattaaataaaatagtaagaatgtatagccctaccagcattctggacataaaacaagggccaaaggaaccctttagag
actatgtagaccggttctttaaaactttaagagcggaacaagctacgcaaggtgtaaaaaattggatgacagacaccttg
ttggtccaaaatgcgaacccagattgtaagaccattttaagagcattaggaccaggggcttcaatagaagaaatgatgac
agcatgtcagggagtgggaggacctagccataaagcaaaagtgttggccgaggcaatgagccaaacaaacagtgccatac
tgatgcagagaagcaattttaaaggctctaaaagaattgttaaatgtttcaactgtggcaaggaagggcacatagccaga
aattgcagggcccctaggaaaaagggctgttggaaatgtggaaaagaaggacaccaaatgaaagattgtactgagagaca
ggccaattttttagggaaaatctggccctcccacaagggagggccagggaattttcttcagaacagaccagagccaacag
ccccaccagaggagagcttcaggtttggggaagagacaacaactccatctcagaagcaggagccaatagacaaggaacta
tatcctttaacttccctcaaatcactctttggcaacgacccctcgtcacaataaagataggggggcaattaaaggaagct
ctattagatacaggagcaggtgatacagtattagaagacctgaatttgccagggaaatggaaaccaaaaatgataggggg
aattggaggttttatcaaagtaagacagtatgaacagatacccatagaaatttgcggacacaaagctataggtacagtat
tagtaggacctacacctgtcaacataattggaagaaatctgttgactcagcttggttgcactttaaattttccaatcagt
cccattgaaactgtaccagtaaaattaaagccaggaatggatggcccaaaggttaaacaatggccattgacagaagagaa
aataaaagcattaacagcaatttgtgatgaaatggagaaagaaggaaaaattacaaaaattgggcctgaaaatccatata
acactccaatatttgccataaaaaagaaggacagtactaagtggagaaagttagtagatttcagggaactcaataaaaga
actcaagatttttgggaagttcaattaggaataccacacccagcagggttaaaaaagaaaaaatcagtgacagtactgga
tgtgggggatgcatatttttcaattcctttatatgaagacttcaggaagtatactgcattcaccatacctagtagaaaca
atgaaacaccagggattaggtatcagtacaatgtacttccacagggatggaaaggatcactagcaatattccaaagtagc
atgacaaaaaccttagagccttttagaaaacaaaatccaggcatagttatctatcaatacatggatgatttgtatgtagg
atctgacttagagatagggcagcatagaacaaaaatagaggaactgagacaacatttgttgaggtggggatttaccacac
cagacaagaaacattagaaagaacctccatttctttggatggggtatgaactccatcctgacaaatggacagtacagcct
acacagctgccagaaaaagatagctggactgtcaatgatatacaaaagttagtgggaaaattaaactgggcaagtcagat
ttatcctggaattaaagtaaggcaactttgtaaactccttaggggggccaaagcactaacagacatagtaccactaactg
aagaagcagaattagaattggcagaaaacagggaaattctaaaagaaccagtacatggagtatactatgacccatcaaaa
gacttgatagctgaaatacagaaacaggggcaggaacaatggacatatcaaatttaccaagaaccattcaaaaatctaaa
aacagggaagtatgcaaaaatgaggactgcccacactaatgatgtaaaacaattaacagaggctgtgcagaaaatagcca
tggaaggcatagtaatatggggaaaaactcctaaatttagattacccatccaaaaagaaacatgggagacatggtggaca
gactattggcaagccacctggattcctgagtgggaatttgttaatacccctcccttagtaaaattatggtaccagctgga
aaaagatcccatagtaggagtagaaactttctatgtagatggagcagctaatagggagactaaaataggaaaagcagggt
atgttactgacagaggaaggaagaaaattgtttctctaactgaaacaacaaatcagaagactgaattgcaagcaatttgt
atagctttgcaagattcaggatcagaagtaaacatagtaacagattcacagtatgcattagggatcattcaagcacaacc
agataagagtgaatcagagttagttaaccaaataatagaacaattaatgaaaaaggaaagagtctacctgtcatgggtac
cagcacataaaggaattggaggaaatgaacaagtagataaattagtaagtagtggaatcaggaaagtgctatttctagat
ggaatagataaagctcaagaagagcatgaaaagtatcacagcaattggagagcaatggctagtgactttaatctgccacc
catagtagcaaaagaaatagtggctagctgtgatcaatgtcagctaaaaggagaagccatgcatggacaagtagactgta
gtccagggatatggcaattagattgtacacatttagaaggaaaaatcatcctggtagcagtccatgtagccagtggctac
atggaagcagaggttatcccagcagaaacaggacaagagacagcatactttatactaaaattagcaggaagatggccagt
caaagtaatacatacagataatggtagtaatttcaccagtactgcagttaaggcagcctgttggtgggcaggtatccaac
aggaatttggaattccctacagtccccaaagtcagggagtagtagaagccatgaataaagaattaaagaaaattataggg
caggtaagagatcaagctgagcaccttaagacagcagtactaatggcagtattcattcacaattttaaaagaaaaggggg
gattggggggtacagtgcaggggaaagaataatagatataatagcaacagacatacaaactaaagaattacaaaaacaga
ttacaaaaattcaaaattttcgggtttattacagagacagcagagaccccagttggaaaggaccagccaaactactctgg
aaaggtgaaggggcagtaataatacaagataatagtgacataaaggtagtaccaaggaggaaagcaaaaatcattaagga
ctatggaaaacagatggcaggtgctgattgtgtggcaggtagacaggatgaagattagaacatggaatagtttagtaaaa
caccatatgtatgtttcaaggagagctaatggatggttttacagacatcattatgacagcagacatccaaaagtaagttc
agaagtacacatcccattaggaaaggctaaattagtaataaaaacatattgggggttgcagacaggagaaagagatcggc
atttgggtcatggagtctccatagaatggagattgagaagatataccacacaaatagaacctggcctggcagaccagcta
attcatttgtattattttgattgttttgcagactctgatataaggaaagccatattaggacacatagttattcctaggtg
tgactatcaagcaggacataataataaggtaggatctctacaatacttggcactgacagcattgataaaaccaaaaaaga
taaagccacctctgcctagtatcaagaaattagtagaggatagatggaacaatccccaggagatcaggggccgcagaggg
aaccacacaatgaatggacactagagcttctagaggagctcaagcaggaagctgttagacactttcctagaccatggctt
catagcttaggacaacatatctatgaaacatatggggatacttgggcaggagtggaagccataataagaattctgcaaca
actgctgtttattcatttcagaattgggtgtcagcatagcagaataggcattttgagacagagaagaacaagaaatggag
ccagtaaatcataaattagagccttgggagcatccaggaagtcagcctaagactgcttgtaacagttgctattgtaaaaa
gtgctgctttcattgccaagtttgtttcacgaaaaaaggcttaggcatcttctatggcaggaagaagcgaagacagcgac
gaagcgctcatcgaagcagtgaggatcatcaaaatcctatatcaaagcagtaagtagtaaatgtaatgcaagctttaacc
attttagcaatagtagccttagtagtagcaacaataatagcaatagttgtgtggaccatagtattcatagaatataggaa
aatattaagacagaaaaaaatagacaggttaattgatagaataagagaaagagcagaagacagtggcaatgagggtgacg
gggatcaggaagaattatcggcatttatggagatggggcaccatgctccttgggatgttgatgatcagtagtgctgtagg
aaacttgtgggtcacagtctattatggggtacctgtatggaaaggggcaaccaccactttattttgtgcatcagatgcta
aagcatatgatacagaggtacataatgtttgggctacacatgcctgtgtacccgcagaccccaacccacaagaaatggtt
ttggaaaatgtaacagaaaattttaacatgtggaaaaatgaaatggtaaatcagatgcaggaagatgtaatcagtttatg
ggatcaaagcctaaaaccatgtgtaaagttgaccccactctgtgtcactttagaatgtagaaatgttagcagtaatagta
atgatacctaccatgagacctaccatgagagcatgaaggaaatgaaaaattgctctttcaatgcaaccacagtagtaaga
gataggaagcagacagtgtatgcacttttttatagacttgatatagtaccacttactaagaagaactatagtgagaattc
tagtgagtattatagattaataaattgtaatacctcagccataacacaagcctgtccaaaggtcacttttgatccaattc
ctatacactattgcactccagctggttatgcaattctaaagtgtaatgataagatattcaatgggacaggaccatgccat
aatgttagcacagtacaatgtacacatgggattaagccagtggtatcaactcaactactgttaaatggtagcctagcaga
aggagaaataataattagatctgaaaatctgacaaacaatgtcaaaacaataatagtacatcttaatcaatctgtagaaa
ttgtatgtacaagacccggcaataatacaagaaaaagtataaggataggaccaggacaaacattctatgcaacaggagac
ataataggagacataagacaagcacattgtaacattagtgaagataaatggaatgaaactttacaaagggtaagtaaaaa
attagcagaacacttccagaataaaacaataaaatttgcatcatcctcaggaggggacctagaagttacaacacatagct
ttaattgtagaggagaatttttctattgtaatacatcaggcctgtttaatggtgcatacacgcctaatggtacaaaaagt
aattcaagctcaatcatcacaatcccatgcagaataaagcaaattataaatatgtggcaggaggtaggacgagcaatgta
tgcccctcccataaaaggaaacataacatgtaaatcaaatatcacaggactactattggtacgtgatggaggaacagagc
caaatgatacagagacattcagacctggaggaggagatatgaggaacaattggagaagtgaattatataaatataaagtg
gtagaaattaagccattgggagtagcacccactacaacaaaaaggagagtggtggagagagaaaaaagagcagtgggaat
aggagctgtgttccttgggttcttaggagtagcaggaagcactatgggcgcggcgtcaataacgctgacggtacaggcca
gacaattgctgtctggtatagtgcaacagcaaagcaatttgctgagggctatagaagcgcaacagcatctgttgcaactc
acggtctggggcattaagcagctccagacaagagtcctggctatagaaagatacctaaaggatcaacagctcctagggat
ttggggctgctctggaaaactcatctgcactactgctgtaccttggaactccagttggagtaacaaatctcaaaaagaga
tttgggataacatgacctggatgcaatgggataaagaaattagtaattacacaaacacagtatacaggttgcttgaagaa
tcgcaaaaccagcaggaaaggaatgaaaaagatctattagcattggacagttggaaaaatctatggagttggtttgacat
aacaaattggctgtggtatataaaaatattcataataatagtaggaggcttgataggtttaagaataatttttgctgtgc
tctctatagtaaatagagttaggcagggatactcacctttgtcgtttcagacccttaccccgaacccagggggacccgac
aggctcggaagaatcgaagaagaaggtggaaagcaagacagggacagatccattcgattagtgaacggattcttagcgct
tgcctgggacgacctgcggaacctgtgcctcttcagctaccaccgattgagggacttcacattagtggcagcgagggtgg
tggaacttctgggacgcaatagtctcaggggactacagagagggtgggaagcccttaaatatctgggaagtcttgtgcag
tactggggtcaggagctaaaaaagagtactattagtctggttgataccatagcaatagcagtagctgaaggaacagatag
gattatagaattagtacaaggactttgtagagctatctacagcatacctagaagaataagacagggctttgaagcagctt
tgcaataaaatggggggcaagtggtcgaaaagtagcatagttggatggcctgctataagggagagaatgagaagaactga
gccagcagcagatggggtgggagcagtatctcgagacctggaaaaacatggagcaatcacgagtagcaatacagcagcta
ctaatgaggattgtgcctggctggaagcacaagaggagggggaggtgggttttccagtcagacctcaggtacctttaaga
ccaatgacttacaagggagctgtagatcttagcttctttttaaaagaaaaggggggactggaagggttaatttactctaa
gaaaaggcaagagatccttgatttgtgggtctatcacacacaaggctacttccctgattggcacaactacacaccaggac
caggggtcagattcccactgacttttgggtggtgcttcaagctagtaccagttgacccaagggaagtagaagaggccaac
gagggagaagacaactgcttgctacaccctgtgtgccagcatggaatggaggatgatcacagagaagtattaaagtggaa
gtttgacagtcaactagcacacagacacagggcccgcgaactacatccggagttttacaaagactgctgacacagaaggg
actttccgcggggactttccactggggcgttctaggaggtgtggtctggcgggactgggagtggtcaaccctcaaatgct
gcatataagcagctgcttttcgcctgtactgggtctctctagtcagaccagatctgagcctgggagctctctggctaact
agggaacccactgcttaagcctcaataaagcttgccttgaggggctagagcggccgccaccgcggtggagctccagcttt
tgttccctttagtgagggttaattgcgcgctggcgatc

>08_BC.CN.1997.97CNGX_6F
gtgcgagagcgtcaatattaagagggggaaaattagataaatgggaaaaaattaggttaaggccagggggaaaaaaacac
tatatgctaaaacacctagtatgggcaagcagggagctggaaagatttgcacttaaccctggccttttagagacatcaga
aggctgtaagcaaataataaaacagctacaaccagctcttcagacaggaacagaggaacttagatcattattcaacacag
tagcaactctctattgtgtacatgaagagatagaagtacgagacaccaaagaagccttagacaagatagaggaagaacaa
aataaaattcagcaaaaaacgcagcaggcaaaaaaagctgaagagaaggtcagtcaaaattatcctatagtgcagaatcc
ccaagggcaaatggtacatcagcccctatcacctagaactttaaatgcatgggtaaaagtagtggaagagaaggctttta
gcccagaagtaatacccatgttcacagcattatcagaaggagccaccccacaagatttaaacaccatgttaaatacagta
gggggacatcaagcagccatgcaaatgttaaaagataccatcaatgaagaggctgcagaatgggatagattgcatccagt
gcatgcagggccagtggcaccaggccagatgagagaaccaaggggaagtgacatagcaggaactactagtactcttcagg
agcaaataggatggatgacaaataatccacctatcccagtaggagaaatctataaaagatggataatcctgggattaaat
aaaatagtaagaatgtatagccctaccagcattctggacataaaacaagggccaaaggaaccctttagagactatgtaga
ccggttctttaaaactttaagagctgaacaagctacacaagatgtaaaaaattggatgacagacaccttgttagtccaaa
atgcgaacccagattgtaagaccattttaagagcattaggatcaggggcttcattagaagaaatgatgacagcatgtcag
ggagtaggaggacctagccacaaagcaagagtgttggctgaggcaatgagccaaacaaacaataccatactgatgcagag
aagcaattttaaaggctctaaaagaattgttaaatgtttcaactgtggcaaggaagggcacatagccaaaaattgcaggg
cccctaggaaaaaaggctgttggaaatgtggaaaggaaggacaccaaatgaaagactgtactgaaaggcaggcgaatttt
ttagggaaattttggccttcccacaaggggaggccagggaatttcctccagagcagaccagagccaacagccccaccagc
agagagcttcaggttcgaggagacaaccccagctccgaagcaggaaccgaaagacagggaacccttaacttccctcagat
cactctttggcagcgaccccttgtctcaataaaagtagggggccagataaaagaggctctcttagacaccggagcagatg
atacagtattagaagaagtaaatttgccaggaaaatggaaaccaaaaatgataggaggaattggaggttttatcaaagta
agacaatatgagcaaatacctatagaaatttgtggaaaaaaggctataggtacagtattagtgggacccacacctgtcaa
cataataggaagaaatatgttgacccagcttggatgcacactaaattttccaatcagtcccattgaaactgtaccagtaa
aattaaagccaggaatggatggcccaaaggttaaacaatggccattgacagaagaaaaaataaaagcattaacagcaatt
tgtgatgaaatggagaaggaaggaaaaattacaaaaattgggcctgacaatccatataacactccaatatttgccataag
aaagaaggacagtagtaagtggagaaaattagtagatttcagggaactcaataaaagaactcaagatttttgggaagttc
aattaggaataccacacccagcagggttaaaaaagaaaaaatcagtaacagtcctggatgtgggtgatgcatatttctca
gttcctttagataaagacttcaggaagtatactgcatttaccatacctagtgtaaacaatgagacaccagggattagata
tcagtacaatgtgcttccacagggatggaaaggatcaccagcaatattccaatgtagcatgacaaaaatcttagagcctt
ttagaaaacaaaatccagacatagttatctatcaatacatggatgacttgtatgtaggatctgacttagaaatagggaag
catagaacaaaaatagaggaactgagagaacatctgttaaagtggggatttaccacaccagacaagaaacatcagaaaga
acctccatttctttggatggggtatgaactccatcctgacaaatggacagtacagcctatacagctgccagaaaaggata
gctggactgtcaatgatatacagaagttagtgggaaaattaaactgggcaagtcagatttacccaggaattaaagtaagg
caactttgtaaactccttaggggggccaaagcactaacagacatagtaccactaactgaagaagcagaattagaattagc
ggaaaacagggaaattttaaaagaaccagtacatggagcatattatgacccatcaaaagaattgatagctgaaatacaga
aacaggggcaggaccaatggacatatcaaatttaccaagaaccattcaaaaatctgaaaacagggaagtatgcaaaaatg
aggactgcccacactaatgatgtaaaacagttaacagaggctgtgcagaaaatagccatggaaagcatagtaatatgggg
aaagattcctaaatttagattaccaatccaaaaagaaacatgggagacatggtggacagactattggcaagccacctgga
ttcctgagtgggaatttgttaatacccctcccttagtaaaattatggtaccaactggagaaagatcccatagcaggagta
gaaactttctatgtagatggagcagctaatagggagactaaaatagggaaagcagggtatgttactgacagaggaaggaa
gaaaattgtttccctaactgacacaacaaatcagaagactgaattgcaagcaatttatatagctttgcaagattcaggat
cagaagtaaacatagtaacagattcacagtatgcattagggatcattcaagcacaaccagataagagtgaatcagagtta
gttaaccaaataatagaacaattaataaaaaaggaaagggtctacctgtcatgggtaccagcacataaaggaattggagg
aaatgaacaagtagataaattagtaagtaatggcatcaggaaagtgctatttctagatggaatagataaagctcaagaag
agcatgaaaagtatcacagcaattggagagcaatggctagtgactttaatctgccacccatagtagcaaaagaaatagta
gctagctgtgatcaatgtcagctaaaaggagaagccatgcatggacaagtagactgtagtccagggatatggcaattaga
ttgtacacatttagaaggaaaaatcattctggtagcagtccatgtagccagtggctacatagaagcagaggttatcccag
cagaaacaggacaagaaacagcatactttatactaaaattagcaggaagatggccagtcaaagtaatacatacagacaat
ggtagtaatttcaccagtgctgcagttaaggcagcctgttggtgggcaggtatccaacaggaatttggaattccctacaa
tccccaaagtcagggagtagtagaatccatgaataaggaattaaagaaacttatagggcaggtaagagatcaagctgagc
accttaagacagcagtacaaatggcagtattcattcacaattttaaaagaaaaggggggattggggggtacagtgcaggg
gaaagaatagtagacataatagcaacagacatacaaactagagaattacaaaaacaaattataaaaattcaaaattttcg
ggtttattacagagacagcagagaccccatttggaaaggaccagccaaactactctggaaaggtgaaggggcagtagtaa
tacaagataatagtgacataaaggtagtaccaaggaggaaagcaaaaatcattaaggactatggaaaacagatggcaggt
gctgattgtgtggcaggtagacaggatgaagattagaacatggaatagtttagtaaaacaccatatgtatgtctcaagga
gagctaatggatggttttacagacatcattatgacagcagacatccaaaagtaagttcagaagtacacatcccattagga
gaggctagattagtaataaaaacatattgggggttgcaaacaggagaaagagattggcatttgggtcatggagcctccat
agaatggagattgagaagctataacacacaaatagaacctggcctggcagaccagctaattcatatgtattattttgatt
gttttgcagactctgccataaggaaagccatattaggacacgtagttattcctaggtgtgactatcaagcaggacataat
aataaggtaggatctctacaatacttggcactgacagcactgataaaaccaaaaaggataaagccacctctgcctagtat
taagaaattagtagaggatagatggaacaacccccagaagatcaggggccgcagagggaaccacacaatgaatggacact
agagcttctagaggaactcaagcaggaagctgtcagacactttcctagaccatggcttcatggcttaggacaatatgtct
atgaaacctatggggatacttggacaggagttgaaactatactaagaatactgcaacaattactgttcattcatttcaga
attgggtgccagcatagcagaataggcattgtgagacagagaagagcaagaaatggagccagtagatcctaacctagagc
cctggaaccatccaggaagtcagcctgaaactgcttgcaataactgctattgtaaacgctgtagctaccattgtctagtt
tgctttcagaaaaaaggcttaggcatttcctatggcaggaagaagcggagacagcgacgaagcgctcctcagagcagtga
ggatcatcaaaatcttatatcaaagcagtaagtatctgtaatgttagatttagaattagcagtaggagcattgatagtag
cactaatcatagcaatagttgtgtggaccatagtatatatagaatataggagattggtaaaacaaaggaaaatagactgg
ttaattaaaagaattagggaaagagcagaagacagtggcaatgagagtgagggggacacggaggaattatcaacaatggt
ggatatggggcgtcttaggcttttggatgttaatgatttgtaatgtggaaggaaacttgtgggtcacagtctattatggg
gtacctgtgtggaaagaagcaaaaactactctattctgtgcgtcagatgctaaagcatatgagacagaagtgcataatgt
ctgggctacacatgcctgtgtacccacagaccccagcccacaagaaatagttatggaaaatgtaacagaaaattttaaca
tgtggaataatgatatggtgaatcagatgcatgaggatgtaaccagtttatgggatcaaagcctaaagccatgtgtaaag
ttgaccccactctgtgtcactttagaatgtagaaatgttagcagtaatggtaatggtacctacaatgagacctacaatga
gagcgtgaaggagataaaaaattgctctttcaatgcaaccacattattaagagataggaagaagacagtgtatgcacttt
tttatagacttgatatagtaccccttaatgatgagaactctggtgagaactctagtgaatattatagattaataaattgt
aatacctcagccataacacaagcctgtccaaaggtcacttttgatccaattcctatacactattgcactccagctggtta
tgcgattctaaagtgtaatgataagatattcaatgggacaggacaatgccataatgttagcacggtacaatgtacacatg
gaattaagccagtggtatcaactcaactactgttaaatggtagcctagcagaaagagagataataattagatctgaaaat
ctgacaaacaatgtcaaaacaataatagtacatcttaatcaatctgtagaaattgtatgtacaagacccaacaataatac
aagaaaaagtataaggataggaccaggacaaacattctatgcaacaggagacatcataggagacataagacaagcacatt
gtaacattagtaaagatgcatggtatgaaactttacagagggtaagtaaaaaattagcagaacacttccctaataaaaca
ataaaattcgcatcatcctcaggaggggacctagaaattacaacacatagctttaattgtagaggagaatttttctattg
taatacatcaggcctgtttaatggtacatacaatggtacatacatgcttaatggtacaagagataattcaagctcaatca
tcacaataccatgcagaataaagcaaattataaacatgtggcaggaggtaggacgagcaatgtatgcccctcccattgaa
ggaaacataacatgtaaatcaaatatcacaggactactattggtacgtgatggaggaagaacagagccaaataatacaga
gatattcagacctggaggaggagatatgagaaacaattggagaaatgaattatataaatataaagtggtagaaattaagc
cattgggagtagcacccactgcagcaaaaaggagagtggtggagagagaaaaaagagcagtgggactaggagctgtgttc
cttgggttcttgggagcagcaggaagcactatgggcgcggcgtcaataacgctgacggtacaggccagacaattgttgtc
tggtatagtgcaacagcaaagcaatttgctgagagctatagaggcgcaacagcatatgttgcaactcacggtctggggca
ttaagcagctacagacaagagtcctggctatagaaagatacctaaaggatcaacagctcctagggatttggggctgctct
ggaaaacttatctgcactactgctgtaccttggaactccagttggagtaacaaatctcaacaagagatttgggataacat
gacctggatgcagtgggataaggaaattagtaattacacaaacacaatatacaggttgcttgaagactcgcaaaaccagc
aggaaagaaatgaaaaagatttattagcattggacagttggaaaaatctatggagttggtttgacataacaaattggctg
tggtatataaaaatattcataatgatagtaggaggcttgataggtttaagaataatttttgctgtgctttctatagtgaa
tagagttaggcagggatactcacctttgtcgtttcagatccttaccccgaacccagggggaccaggcaggctcggaagaa
tcgaagaagaaggtggagagcaagacaaaaccagctccattcgattagtgaacggattcttagcgcttgcctgggacgac
ctacggaacctgtgcctcttcagttaccaccgcttgagagacttcatattactgacagcgagaggggtggaacttctggg
acgcaacagcctcaggggactacagagggggtgggaagcccttaaatatctgggaagtcttgtgcagtattggggtctgg
agctaaaaaagagtactattagtctggttgatgccatagcaatagcagtagctgaaggaacagataggattataaacaga
gtacaaggaatttgtagagctatccacaacgtacctagaagaataagacagggctttgaagcagctttgcaataaaatgg
ggggcaagtggtcaaaaagtagcatagtgggatggcctgctataagagaaagaataagacgaactgagccagcagcagat
ggggtgggagcagtatctcgagacctggaaaaacatggagcaatcacaagtagcaacacagcagatactaatgctgattg
tgcctggctagaaacacaagaggaggaggaggtgggttttccagtcagacctcaggtacctttaagaccaatgactttta
agggagcattcgatctcagcttctttttaaaagaaaaggggggactggaagggttaatttactctaagaaaaggcaagag
atccttgatttgtgggtctatcacacacaaggctacttccctgactggcacaactacacaccaggaccaggggtcagatt
cccactgacttttgggtggtgcttcaagctagtaccagttgacccaagggaagtagaagaggccaacgaaggagaagaca
actgtttgctacaccctgtctgccagcatggaatggaggatgaacacagagaagtattaaagtggaagtttgacagtcaa
ctagcacacagacacagggcccgcgaactacatccggagttttacaaagactgctgacacagaagggactttccgcggga
ctttccaccggggcgttccaggaggtgtggtctgggcgggactgggagtggtcaaccctcagatgctgcatataagcagc
tgcttttcgcctgtactgggtctctctagttagaccagatctgagcctgggagctctctggctagctagggaacccactg
ct

>09_cpx.GH.1996.96GH2911
atgggtgcgagagcgtcagtactaagtgggggaaaattagatgcatgggagaaaattcggttaaagccagggggaaagaa
aaaatatagaatgaagcatctagtatgggcaagcagggagttggaaagattcgcagttgatcctagcctcttagaaacaa
caggagggtgtcaacaaatattggaacagttacagccatctcttaggacaggatcagaagaacttaaatcattatataat
acagtagcaaccctctattgtgtacatcaaaagatagaggtaagagacaccaaggaagcgttagataaaatagaggaaat
acaaggtaagagcaagcaaaagacacagcaggcaacagctaacacaggaaacaacagcaaggtcagccaaaattacccaa
tagtgcagaatgcacaagggcagatggtacatcaggccatctcacctagaactttraatgcatgggtaaaagtaatagaa
gaaaaggctttcagcccagaagtaatacccatgttcacagcattatcagagggagccaccccacaagatctaaatatgat
gctaaacatagttggaggacatcaggcagctatgcaaatgctaaaagataccatcaatgaggaagctgcagaatgggata
gggtacatccagtacatgcagggcctaatccaccaggccaaatgagagaaccaaggggaagtgacatagcaggaactact
agtaccgttcaagaacaaatagcatggatgacaggtaacccacccatcccagtgggagaaatctataaaagatggatagt
cctgggattaaataaaatagtaagaatgtatagccctgtcagtattttggacataagacaagggccaaaagaacccttca
gggactatgtagatagattctttaaaactctcagagctgagcaagctacacaggatgtaaaaaattgaatgacagaaacc
ttgctggtccaaaatgcgaatccagactgtaagaccatcttaagagcattaggaccaggggctacattagaagagatgat
gacagcatgtcagggagtgggaggacctggccataaagcaagagttttggcygaagcaatgagtcaagtacaaaatacaa
acatactaatgcagagaggcaattttaagggtcagaaaagaattaagtgtttcaactgtggcaaagaaggacamytagcc
agaaattgcagggcccctaggaaaaagggctgttggaaatgtgggaaggaaggacaccaaatgaaagactgcactgagag
acaggctaattttttagggaaaatttggccttccaacaaagggaggccagggaactttccycagagcagaccggagccat
cggccccrccagcagagagctttgggatgagggaagagacmacctcctctcyraarcagragaaggacggggaacrgccc
cctcctttartttccctcaaatcactctttggcaacgacccattgtcacagtaaaaataggaggacaattaaaggaagct
ctgttagacacaggagcagatgatacagtgttagaagaaataaatttgccaggaaaatggaaaccaaaaatgataggggg
aattggaggttttatcaaagtaagacagtatgatcaaatacttatagagatttgtggacaaaaggcgataggtacagtat
tagtaggacctacacctgtcaacataattggacggaacatgttgactcaaattggttgtactttaaattttccaattagt
cctattgaaactgtaccagtaaaattaaagccaggaatggatggcccaaaaattaaacaatggcccttgacagaagaaaa
aataaaagcattaacagaaatttgtgcagagatggaaaaggaaggaaaaatttcaaaaattgggcctgaaaatccatata
atactccagtatttgctataaagaaaaaggacagcactaagtggagaaaattagtagatttcagagaacttaataaaaga
actcaggatttctgggaagttcaattgggaataccacatccagcgggtctaaaaaagaaaaaatcagtaacagtattgga
tgtgggggatgcatatttttcagtccctttagataaagacttcaggaagtatactgcattcactatacctagtgttaata
atgagacaccggggatcagatatcagtacaatgtgctaccacagggatggaaaggatcaccagcaatattccagagtagc
atgacaaaaatcttagagccctttagaataaaaaatccagaaatagttatataccaatacatggatgatttgtatgtagg
gtctgacttagaaatagggcaacatagagcaaaaataaaggaactaagagaacatctattgaaatggggatttactacac
cagacaaaaagcatcagaaagaacccccatttctttggatggggtatgaactccatcctgacaaatggacagtgcagcct
atacaactgccagacaaggaaagctggactgtcaatgatatacagaaattagtaggaaaattaaactgggcaagtcagat
ttatgcagggattaaagtaaagcaactgtgtaaactcctcagaggagctagagcactaacggatatagtaacactgactg
aggaggcagaattagaattggcagagaacagggagattctaaaagagcctgtgcatggggtatattatgacccatcaaaa
gacttagtagcagaaatacagaaacaagggcaagaccaatggacatatcaaatttatcaagagccatttaaaaatctgaa
aacaggaaaatatgcaagaaagaggtctgctcacacgaatgatgtaagacagttaacagaagtggtgcaaaaggtgacca
cagaaagcatagtaatatggggaaagacccctaaatttaaattacccatacaaaaagaaacatgggaaacatggtgggca
gagtattggcaggctacctggattcctgaatgggaatttgtcaatacccctcctctagtaaaattatggtaccagttaga
aaaagaccccataataggagcagagactttctatgtagatggggcagctaatagggagactaagctagggaaagcggggt
atgtaactaaccgaggaagacaaaagattgtatccctaactgaaaccacaaatcaaaagactgagctacatgccatacat
ctagccttacaggattcaggatcagaagtaaatatagtaacagactcacaatatgcattaggaatcattcaggcacaacc
agacaggagtgaatcagagttagtcaatcaaataatagagaagctaatagaaaaagaaaaggtctacctgtcatgggtac
cagcacataaaggaattggaggaaatgaacaagtagataaattagtcagtagtggaatcagaaaagtactatttttagat
ggcatagataaagctcaagaagaacatgaaagatatcatagcaattggagagcaatggctagtgattttaatctgccacc
tgtagtagcaaaagaaatagtggccagctgtgataaatgtcagctaaaaggggaagccatgcatggacaagtagactgta
gtccaggaatatggcaattagattgtacacatttagaaggaaaaattattctggtagcagtccatgtagccagtggttat
atagaagcagaagttatcccagcagaaacaggacaagaaacagcatactttatattaaaattagcaggaagatggccagt
aaaagtgatacacacggacaatggcagtaatttcaccagtgctgcagtaaaggcagcatgttggtgggcaaatgtcacac
aagaatttggaattccctacaatccccaaagccaaggagtagtggaatctatgaataaagaattaaagaaaatcataggg
caggtcagggatcaagctgaacaccttaagacagcagtacagatggcagtattcattcacaattttaaaagaaaaagggg
gattggggggtacagtgcaggggaaagaataatagacataatagcatcagatatacaaactaaagaactacaaaaacaaa
tcacaaaaattcaaaattttcgggtttattacagggacagcagagacccaatttggaaaggaccagcaaaactactctgg
aaaggtgaaggggcagtagtaatacaggacaataatgatataaaggtagtaccaagaagaaaagcaaagatcattaggca
ttatggaaaacagatggcaggtgatgattgtgtggcaggtagacaggatgaggattaatacatggaaaagtttagtaaaa
taccatatgcatacttcaaagaaagctaaaagatggttttatagacatcactatgatagcaatcatccaaaaataagctc
agaagtacacatcccgctaggagctgctgaattagtagtgacaacatattggggtctgcatacgggagaaagaaaatggc
atttgggtcagggggtctccatagaatggaggctgaaaaggtacaggacacaagtagaccccagcctggcagaccaacta
attcatatacattactttgattgtttttcagaatctgccataaggaaagccataataggagatagagttagccctaggtg
tgaatatcaagcaggacataataaggtaggatctttacaatatctggcactaacagcattaataaacccaagaaaaacaa
agccacctttgcctagtgttaagaaactagtagaggatagatggaacaagccccagaggaccaggggccacagagagaac
caaacaatgaatggacactagagcttttggaggagcttaagaatgaagctgttagacattttcctaggccttggctccat
ggcttaggacaacatatctatgatacctatggggatacttgggaaggagttgaagctataataagaattttgcaacaatt
actgtttgttcatttcagaattgggtgccatcatagcagaataggcattattcgagggaggagaagaggcagggatggag
ctggtagatcctaacctagagccctggaaccatccaggaagtcagcctgcaactgcttgtaacaaatgttactgtaaaag
atgttgctatcattgccaacactgcttcttgaacaaaggcttaggcatctcctatggcaggaagaagcggagacaacgac
gagcagcttcttgcggcagtaagagtaatcaagatcctataccaaagcagtgagtataattaaataagctctgtaatgca
atctttgcaaatagcaagcatagtaggaataatagtagcattcatagcagccataattgcgtggaccatagtatttatag
aagttaggaagataagaaaacaaaagagaatagataggttaattgatagaataagagatagagcagaagacagtggcaat
gagagtgaaggagatacagaggaattggcaaaacttgtggagatggggcctcatgattcttggaatgttgatgatttgta
atgctgcagaaaacttgtgggtcacagtctattatggggtacctgtgtggaaagaggcagagaccaccttattttgtgca
tcagatgctcaggcatactctaaagaaaaacataatgtttgggctacacatgcctgtgtgcccacggaccccaacccaca
agaaataggtctggaaaatgtaacagaaaattttaacatgtggaaaaataacatggtagagcagatgcataaagacataa
tcagtctatgggatcaaagcttaaagccatgtgtaaagttaacccctctctgcgtcacgttagattgccatagagtcaac
aacagcaaacccaacaccacgagtgacgggagtgaagtaagaatgcaaaactgctctttcaatataaccacagaattaag
agataaacaccagaaagtatattcacttttttatagatctgatatagtatcaatcaatgcaagtaataatgagtatagac
taataaattgtaatacctcagccattacacaggcttgtccaaaggtaacctttgagccaattcccatacattattgtgcc
ccagctggttttgcgattctaaagtgtagggataaggagttcaatggaacaggaatatgtaaaaatgtcagttcagtaca
atgtacgcatgggattaggccagtggtatcaactcaattactgctgaatggcagtttagcagaagaagacataataatta
gatctgagaatatcacaaacaatgtcaaagtcataatagtacagttggctgatcctgtaacgattgattgtgtcagaact
ggcaacaatacaagaacaagtgtacgtataggaccaggacaaacgttctatgcaacaggtgacataataggagatataag
gaaagtacattgtcagattaatggaacaaaatggaatgaaatcttaggaaaggtagctgaaaaattaaaaggacacttta
ataataagacaataatctttcgaccatcctcaggaggggatgtagaaattacaacacatagttttaattgtggaggagaa
tttttctattgcgatacatcaggcctatttaataacacttggaatggtacttgggaaaataacaataatagcatagaaaa
ttacactatccactgcagaataaagcaaattgtgagaatgtggcagagagtaggacaagcaatgtatgcccctcccatcc
caggagaaataaggtgtagatcaaacattacaggactaatattaacaagagatggtgggagtgatgacaatgagaccttc
agacctacaggaggaaatatgaaggacaattggagaagtgaattatataagtataaagtggtaaaaattgaaccactagg
agtggcacccaccagggcaaggagaagagtggtggagagagaaaaaagagcagttggaatgggagctcttttccttgggt
tcttaggagcagcaggaagcactatgggcgcagcgtcaataacgctgacggtacaggccagacaattattgtctggcata
gtgcaacaacagagcaatctgctgcgggctatagaggctcaacagcatctgttaaaactcacggtctggggcattaaaca
gctccaggcaagagtcctggctgtggaaaggtacctaaaggatcaacagctcctaggaatttggggctgctctggaaagc
tcatctgcaccactaatgtgccctggaactctagttggagtaataaatctcaacatgaaatatgggagaatatgacctgg
ctggaatgggatagagaaattagtaattacacacaactgatatataggctaatagaagaatcgcagaatcagcaggaaaa
gaatgaacaagacttattggcattggacagctgggcaagtctgtggagttggtttgacataacaaattggctgtggtata
taagattattcataatgatagtaggaggcttgataggtttaagaataatttttgctgtgctttctgtagtaaatagagtc
aggcagggatactcacctttgtcattccagacccttaccccaaacccgagggaacccgacaggcccgaaggaatcgaaga
aggaggtggagagcaagacaaagtcagatcaattcgattagtgagcggattcttcgcgcttgcctgggacgacctgagga
acctgtgcctcttcagctaccaccgcttgagagacttcatcttaattgcagcgaggactgtggaaattctgggacacagg
gtgtggcagatcctcaaatatctggggaatcttgcgcaatattggggtcaggaactaaagaatagtgctattagtttgct
taataccacagcaatagtagtagccgaggggacagatagggttatagaagttttgcaaagggctggtagagctatccttc
atatacctagaagaatcagacagggctttgaaagggctttgctataacatgggtggcaagtggtcaaaaagtarcatagt
gggatggcctgagattagggaaagaataagaagaacctccccmtccccagcagaaggggtgggagcagcgtctcaagatt
taggtagrcatggggcacttacaagcagcaacactgcctctactaatcatgactgtgcctggctggaggcacaggaagat
gaggacgtagggttcccagtcagaccccaggtacctttaagaccaatgacttataagggagctgtcgatctcagtttctt
tttaaaagaaaaggggggactggatgggttaatttactccaagaaaagacaagaaatccttgatctgtgggtctaccaca
cacaaggctacttcccagattggcaaaactacacaccaggaccaggggtcagatttccattgacctttggatggtgcttc
aagttagtgccagtagatccaaaggaagtagaggaggccactggaggagagaacaacagcttgttacaccctatgtgcca
acatggagtggattcaggaggagaagtgctgatgtggaggtttgacagcaccctagcactgaaacayatagccagagaga
aacatccggagttctacaaagactgctgacacagaagttctagcaggggactttccgaaggggactttccaggggaggtg
tggcctgggcggggttggggagtggctaaccctcagatgctgcatataagcagccgcttttcgcttgtactgggtctctc
ttggtagaccagatagagcctgggagctctctggctagcaagggaacccactgcttaagcctcaataaagcttgccttga
gtgcctaaagtagtgtgtgcccgtctgttgtgtgactctggtaactagagatccctcagaccactctagacgaggtaaaa
atctctagcagtggcgcccgaacagggacttgaaagcgaaagttaatagggactcgaaagcgaaagttccagagaagttc
tctcgacgcaggactcggcttgctgaggtgcacacagcaagaggcgagagcggcgactggtgagtacgccatatttttt

>11_cpx.GR.-.GR17
cttgacgcaggactcggcttgctgaggtgcacgcagcaagaggcgagagcggcggctggtgagtacgccaaaaaattttt
gactagcggaggctagaaggagagagatgggtgcgagagcgtcagtattaagcgggggaaaattagatgcatgggaaaaa
attcggttaaggccagggggaaagaaaaagtataggctaaaacatctagtatgggcaagcagggagctggaaagattcgc
acttaaccctagccttttagaaacaggagaaggatgtaaacaaataatgggacaattacaaccagctctcgggacaggaa
cagaagaacttagatcattatataatacagtagcagccctctattgtgtacatctcaggatagaggtaaaggacaccaag
gaggctttagataaagtagaggaaatacaaaataagagcaagaaacagcaggcagcagctgactcaggaaacagcaacaa
ggtcagtcaaaattaccctatagtgcagaatgcacaagggcaaatggtacaccaggccatgtcacctagaaccttgaatg
catgggtgaaagtaatagaagaaaaggctttcagtccagaagtaatacccatgttttcagcattatcagaaggagccacc
ccacaagatttaaatatgatgctgaacatagtggggggacaccaggcagctatgcaaatgttaaaagataccatcaatga
ggaagctgcagaatgggacagggtacatccagtacatgcagggcctgccccaccaggccagatgagggaaccaaggggaa
gtgacatagcaggaacaactggtaaccttcaagagcaaataggatggatgacaggcaacccacctatcccagtaggagaa
atctatagaagatggataattctgggattaaataaaatagtaagaatgtatagccctgttagcattttggacataagaca
agggccaaaagaacccttcagagattatgtagacagatttttcaaaactcttagagctgaacaagcttcacaggaggtaa
agaactggatgacagaaaccttgctggtccaaaatgcgaatccagactgtaagtccattttaagagcattaggagtagga
gctacactagaagaaatgatgacagcatgccagggagtaggaggacccagccataaagcaagggttttggctgaggcaat
gagccaagcacaacatacaaatataatgatgcagagaggcaattttaagggccagaaaagaattaagtgtttcaactgtg
gcaaagaaggacatctagccagaaattgcagggcccctagaaaaaagggctgttgaaaatgtgggaaagaaggacaccaa
atgaaagactgcaccgagagacaggctaattttttagggaaaatttggccttccagcaaggggaggccagggaatttcct
acagagcaggccagagccaacagccccaccagcagagagcttcgggttcggggaggagacaaccccctccccgaaacagg
agcccaaggagaaggaactatatcctataacttccctcaaatcactctttggcagcgacccgttgtcccagtaaaagtag
cggggcagctgaaggaagctctattagatacaggagcagatgatacagtattagaagaaatgagtttgccaggaagatgg
aaaccaaaaatgatagggggaattggaggttttatcaaagtaaaacaatatgaggatataaccatagagattgaaggaaa
aaaggctataggtacagtgttaataggacctacacctgtcaacataattggaagaaacatgttgacccagattggctgta
ctttaaattttccaattagtcctgttgacacagtgccagtaaaattaaagccaggaatggatggcccaaaagttaaacaa
tggccattgacagaagaaaaaataaaagcattaacagaaatctgtacagaaatggaaaaggaaggaaaaatttcaaaaat
tgggcctgaaaatccatataacactccagtgtttgccataaagaaaaaagacagcactaaatggagaaaattagttgatt
ttagggaactcaataaaagaactcaagacttctgggaaatacaattaggaataccacatccagcaggattaaaaaagaaa
aaatcagtaacagtactggatgtgggagatgcatatttttcagtccttctagatgaaagcttcagaaagtatactgcatt
cactatacctagtctaaacaatgagacaccagggattagatatcagtacaacgtgctaccacagggatggaaaggatcac
cggctatattccagagtagcatgacaaaaatcttagaaccatttagaacacaaaacccagaagtagttatctatcaatac
atggatgacttgtatgtggggtctgacttagaaataggacagcatagagaaaaggtagaggaattgaggaagcatctatt
aaaatggggattcaccacaccagataaaaaacatcagaaagaacctccattcctctggatgggatatgagctccatcctg
acaaatggacggtacaacctatacagctgccagacaaagagagctggactgtcaatgatatacaaaagttagtgggaaaa
ctgaattgggcaagtcagatttatgcagggattaaagtaaagcaactatgtaaactccttaggggggccaaagcactaac
agacatagtaccactgactgcagaagcagaattggagttggcagagaatagggaaattctaaaagaaccagtacatggag
tatattatgacccatcaaaagacttaatagcagaagtacagaaacaagggttagaccagtggacatatcaaatatatcaa
gagcctttcaaaaacctgaaaacagggaaatatgcaaaaaggaggactgcccacaccaatgatgtcagacaattagcgga
agtggtacaaaaaatagccttggaaggcatagtaatatggggaaaaattcctaaatttagattacccatacaaaaggaaa
catgggagacatggtggacagactattggcaagccacctggatacctgaatgggagtttgtcaataccccccctctagta
aaattatggtaccagttagaaaaggagcccataataggggcagaaaccttctatgtagatggggcagctaatagggaaac
taaactaggaaaagcagggtatgtcactaacaaaggaaggcaaaaagtgattaccccaattgaaacaacaaatcaaaaga
ctgaactagaagcaattcatttagctttgaaggattcaggattagaagtaaatatagtaacagattcacaatatgcattg
ggaattattcaagcacaaccagataagagtgaatcagagttagtcagccaaataatagagcaattaataaaaaaggaaaa
ggtctacctgtcatgggtaccagcacacaaaggaattggaggaaatgaacaagtagataaattagtcagttctggaatca
ggaaagtgctatttctagatggaatagataaagctccagaaggacatgaaagatatcacagcaactggagagcaatggct
agtgatttcaatctgccacctgtaatagcaaaggaaatagtagccaactgtgataaatgccaactaaaaggggaagccat
gcatggacaagtagactgtagtccaagaatatggcaattagattgtacacatctagaaggaaaaataatcctggtagcag
tccatgtagccagtggctatatagaagcagaagttatcccagcagaaacaggacaggaaacagcatactttatattaaaa
ttagcaggaagatggccagtaaaagtaatacatacagataatggcagcaatttcaccagcaatgcagttaaagcagcctg
ttggtgggcaggtatccaacaggaatttgggattccctacaatccccaaagtcaaggagtggtggaatctatgaataagg
gattaaaggaaatcatagggcaggtaagagaacaagctgaacatcttaagacagcagtacaaatggcagtattcattcac
aattttaaaggaaagggggggattggggggtacagtgcaggggaaagaataatagacataatagcaacagacctacaaac
taaagaactacaaaaacaaattacaaaaattcaaaaatttcgggtttattacagggacagcagagacccaatctggaaag
gaccagcaaaactactctggaaaggtgaaggggcaatagtaatacaggacaatagtgatataaaagtagtaccaagaaga
aaagcaaagatcattagggattatggaaaacagatggcaggtgatgattgtgtggcaggtagccaggatgaggattagaa
catggaatagtttagtaaaacatcatatgtatgtctcaaagaaagctaaagggtggttgtacaggcatcactatgagagc
aggcatccaagagtaagctcagaagtacacatcccactagaggaggatatgttagtagtgacaacatattggggtctgca
tacaggagaaagagaatggcatttgggtcagggggtctccatagaatggaggcggaaaaggtacagaacacaagtagacc
ctgaactggcagaccaactaattcatatgcactactttgattgttttgcagaatctgccataaggaaagccatattagga
catagagttagtcctaggtgtgaatatccagcaggacgtaacaaggtaggatctttacaatatttggcattgaaagcatt
agtaacaccaaaaaggacaaagccacctttgcctagtgttaggaaattaacagaggatagatggaacaagccccagaaga
ccaggggccgcagagggaaccatacagtgaatggatgttagaactgttagaagagcttaagcatgaagcagttaggcatt
ttccaaggccatggctccatggattaggacaacatatctataacacctatggagatacttgggaaggagttgaagctata
ataagaattttgcaacaactactgtttgttcatttcaggattgggtgccaacatagcagaataggcattatccgagggag
aagaggcagaaatggagccaggagatattaacatagatccctggaatcagccgggaagtcagcctaagactgcttgtaac
cagtgttattgtaaaaggtgttgctatcattgtcaacattgcttcttaaagaaaggcttaggcatttcctatggcaggaa
gaagtggagacagcgacgcacagcttctcgcagcagcaagaatcatcaagatcctataccagagcagtgagtataattag
ttagtgctgtaatgataactttgcgaacagttaagcatagtagcattagttagcagcatttattaatagcaataattgtg
tggactatagcaggtatagaatatagaaggctgttaagacacaggaaatagatagattattatagaataagagaagagca
gaagacagtggcaatgagagtgaaggagacacagaggaattggcacaacttgtggagatggggcctcatgatctttggaa
tgttaatgatctgtaatgcagaaaaaatgtgggtcacagtctattatggggtacctgtgtggagagatgcggataccatt
ctattttgtgcatctgatgctagaacatatagtactgaaaaacataatgtctgggctacacactcctgtgtacccacaga
ccccaacccacgagaactaagtctagaaaatgtaacagaaaattttaacatgtggaaaaataacatggtagaacagatgc
atgaggatgtaatcagcttatgggatgaaagcttaaaaccatgtgtaaagctaacccctctctgtgttgctttaaattgt
actgatgcaagggataacgcaacagacataaaaaactgcactttcaatataaccacagaactagaagataagaagaagaa
cgaaagagcgcttttctatagacttgatgtagtaccaattaatgatagtagtagtaatataggtcagtataggctaataa
attgtaatgtctcagcagtcaaacaggcttgctcaaaagtaacctttgagccaattcctatacactattgtgctccagct
ggttttgcgattctaaagtgcagggataaggagttcaatggaacaggaccatgcaaaaatgtcagcacagtacaatgtac
acatggaatcaagccagtagtatcaactcaactactgttaaatggcagtctagcagaaggagaggtaaggattagatctg
aaaacctcacaaacaatgctaaaaccataatagtacagcttaacagtactgtaagaattaattgtaccagacctaacaac
aatacaagaaagggtatacatataggaccaggacaagctttttatgcaacaggtgatataataggggatataaaacaagc
acattgtaacgtcagtagagcagactggaataacactttacaacaggtagctgaacaattacataataactttaacaaaa
caatagtatttaatgagcattcaggaggggatttagaagttacaacacatagttttaattgtggaggggaatttttctac
tgcaatacatcaggcctgtttaatagcacttggtatgcaaatgacaataccagcacacaaaatgacatgcagtcaaatga
cactataactctcccatgcagaataaagcaaattataaatatgtggcagagagtaggacaagcagtgtatgcccctccca
tccaaggagaactaaggtgtgactcaaacattacaggactactattaacaagagatggtggggaggggaatgataccatt
gggaaagagaccttcagacctacaggaggagatatgagaaacaattggagaagtgaattgtataagtataaagtagtaga
gattaaaccactaggagtagcacctaccaaggcaaaaagaagagtggtggagagagaaaaaagagcagtgggaataggag
ctgtgctccttgggttcttgggagcagcaggaagcactatgggcgcggcgtcaataacgctgacggtacaggccagacaa
ttattgtctggcatagtgcaacagcaaaacaatttgctgaaggctatcgaggtacaacaacatctgttgaaactcactgt
ctggggcattaaacagctccaggcaagagtcctggctgtagaaagatacctaaaggatcaacagctcctagggatttggg
gctgctctggaaaactcatctgcaccactaatgtgccctggaatgttagttggagtaataaaacttataatgagatttgg
gagaacgagaacatgacttggataaaatgggaaagggaaattgacaattacacacaaacaatatacaccctgattgaaga
atcacagaaccagcaggaaaagaatgaacaagacttattagcattggacaaatgggcaagtctgtggaattggtttgaca
tatcaaattggctatggtatataagaatatttataatgatagtaggaggcttaataggtttaagaataatttttgctgtg
ctttctatagtaaatagatgtaggcagggctattcacctttgtcctttcaggcccttaccccaagccagcaggaacccga
caggcccggaggaaccaaagaaggaggtggagagcaaggcagaaccagctccattcgattagtcagcggattcttagcac
ttgcctgggacgatctgaggaacctgtgcctcttcctctaccaccaattgagagacttcatcttgattgtagcgaggatt
gtggaaactctgggacgcagggggtgggagagtctcaaatacctggggaatctagcacagtactggggccaagaactgaa
gagtagtgctattagtttgcttaatgccacagcaatagcagtagctgaaggaacagataggattatagaggtagcacata
gagctttaagagctatactcaatatacctagaagaataagacagggctttgaaagggctttgctataacatgggtggaaa
ttggtcaaaaagtagcatagtgggatggcctgagattagggaaagattaagacgcactcctccaacagcagcagcagaag
gagtaggagcagcatctaaagatttagaaagacatggagcaatcacaagcagtaatacaagccagaataatgctgcttgc
gcctggctagaagcacaagaggatgaaggggtaggctttccagtcagaccgcaggtacctttaagaccaatgacttataa
gggagcttttgatcttagcttctttttaaaagaaaaggggggactggatgggctaatttactccaagaaaagacaagaga
tccttgacctgtgggttcataatacacaaggattcttccctgattggcagaattacacaccagggccagggatcagatac
ccactgtgttttggatggtgctacaagctagtaccagttgacccaagagaagtagaagaggccaatgaaggagagaacaa
ctgcctgttacaccccatgagccagcatggaatagaggatgaagatagagaagtgttaagatggaagtttgacagttccc
tagcacgaagacacatagcccgagagctgcatccggacttctacaaagactaagactgctgacacagaagttgctgacat
aaaagttgctgacagggactttccgctggggactttccaggggaggtgtggcctgggcggggttggggagtggttaaccc
tcagaagctgcataaaagcagccgcttctcgcttgtactgggtctctctagttagaccagatctgagcctgggagctctc
tggctagctagggaacccactgcttaagcctcaataaagcttgccaagccgaatt

>12_BF.AR.1999.ARMA159
tggaagggttaatttattccaagaaaagacaagagatccttgatctgtggatctaccacacacaaggttacttccctgat
tggcagaactacacaccagggccaggggtcagattgccactgacctttgggtggtgcttcaagctagtaccagttgaccc
agtggaggtagaaaaggccaatgaaggagagaacaactgcttgctacaccccatgagccaacatggaatggaagatgaag
acagagaagtactgatatggaagtttgacagccgcctggcgctaagacacttagccagagagaaacatccagagtggtat
aaagactgagactgctgacacagagactgctgacacagaagaatctaaagggactttccgctggggactttccagagggc
gggccagagggcgtgactggggagtggctcaccctcagatgctgcatataagcagccgcttttcgcctgtactgggtctc
tctagttggaccagattagagcctgggagctctctggctagctagggaacccactgcttaagcctcaataaagcttgcct
tgagtgcttcaagtagtgtgtgcccatttgttgtgtgactctggtaactagagatccctcagaccattctagtcagtgtg
gaaaatctctagcagtggcgcccgaacagggacttgaaagcgaaagtagaaccagaggagatctctcgacgcaggactcg
gcttgctgaagcgcgcacggcaagaggcgagaggcggcgactggtgagtacgccaaaaattttgactagcggaggctaga
aggagagagatgggtgcgagagcgtcagtattaagcgggggagaattagatagatgggaaaaaattcggttgaggccagg
gggaaagaaaaaatatagattaaaacatatagtatgggcaagcagggagctagaacgattcgcagttaatcctggcctat
tagaaacatcagaaggctgtcgaaaaattataggacagctacaaccatcccttcagacaggatcagaagagcttagatca
ttatttaatacagtagcagtcctctattgtgtacatcaaaagatagaggtaaaggacaccaaggaagctttagagaagct
agaggaagaacaaaacaaaagtcagcaaaaaacacagcaagcggcagctgacaaaggggtcagtcagaattaccctatag
tacagaatcttcagggacaaatggtacaccagcctttatcacctagaactttaaatgcctgggtaaaggtggtagaagag
aaggcttttagcccagaagtaatacccatgttttcagcattatcagaaggggccactccacaagatttaaacaccatgtt
aaatacagtaggaggacatcaagcagctatgcaaatgttaaaagacaccatcaatgaggaagctgcagactgggacagat
tacatccagtgcatgcaggacctatcccaccaggccagatgagggaacctaggggaagtgatatagctggaactactagt
acccttcaggaacaaatacaatggatgacaagcaacccacctgtcccagtgggagaaatctataaaagatggatcatcct
aggattaaataaaatagtaagaatgtatagccctaccagcattttggacataagacaagggccaaaagaaccctttagag
actatgtagacaggttctttaaaaccctaagagctgagcaagctacacaggaagtaaagaattggatgacagacaccttg
ttggtccaaaatgcgaacccagattgtaaaaccattttaaaagcattgggatcaggggctacactagaagaaatgatgac
agcatgtcagggagtgggaggacctggccataaggcaagagttttggctgaagcaatgagccaagcaacaagtacagctg
tactgatgcagaaaagtagctttaatggccaaagaagaattgttaaatgtttcaattgtggcaaaacaggacacatagcc
aaaaattgcaaggctcctagaaaaaagggctgttggaaatgtggaaaagaaggacaccaaatgaaagactgccctgaaag
acaggctaattttttagggaaaatttggccttccaacaaggggaggcccggaaatttccttcagaacaggccagagccaa
cagccccgccagcagagagctttgggttcggagaggagataacctcctctccgaagcgggagcagaaagacgagggacag
taccctcccttagcttccctcaaatcactctttggcaacgacccctagtcataataaaagtagggggacagctaaaggaa
gctctattagatacaggagcagatgatacagtattagaagacataaatttgccaggaaaatggaaaccaaaaatgatagg
gggaattggaggttttatcaaagtaaaacagtatgataacgtactcatagaaatttgtggacacaaggctataggtacag
tgttaataggacctacaccggtcaacataattggaagaaatctgttgactcagcttggttgcactttaaattttcccatt
agtcctattgaaactgtaccagtaaaattaaagccaggaatggatggcccaaaagttaaacaatggccattgacagaaga
aaaaataaaagcattaacagaaatatgtacagaaatggaaaaagaaggaaaaatttcaaaaattgggcctgaaaatccat
acaatactccagtatttgccataaagaaaaaagacagtactaaatggaggaaattagtagatttcagagaacttaataaa
agaactcaagatttttgggaggtgcaattaggaataccgcatcctgcagggttaaaaaagaaaaaatcagtaacagtact
agatgtgggggatgcatacttttcagtccccttagatgaggctttcaggaagtacactgcattcaccataccttgtgtca
acaatgagacaccaggaactaggtaccagtacaatgtgcttccacaggggtggaaaggatcaccagcaatattccaaagc
agcatgacaaagatcctagagccttttagaaaacaaaatccggacatagttatctatcaatacatggatgatttgtatgt
aggatctgatttagaaatagggcagcatagaacgaaaatagaggaactaagacaacatctgttaaggtggggatttacca
caccagacaaaaaacatcagaaagaacctccattcctttggatgggttatgaactccatcctgataaatggacggtacag
cctatagtgctgccagaaaaagacagctggactgtcaacgacatacagaagttagtgggaaaattaaattgggcaagtca
gatttacccagggattaaagtgaagcaattatgtagactccttaggggaaccaaggcactaacagaagtaataccactaa
caaaagaagcagagctagaactggcagaaaacagggaaattctaaaagaaccagtacatggagtgtattatgacccatca
aaagacttaatagcagaagtacagaagcaggggcaaggtcaatggacatatcaaatctttcaagagccatttaaaaatct
gaaaacaggaaaatatgcaagaatgaggggggcccacactaatgatgtaaaacaattaacagaagcagtgcaaaaaatag
ccacagagagcatagtaatatggggaaagactcctaagtttaaactacccatactaaaagagacatgggatacatggtgg
acagagtattggcaagccacctggattcctgaatgggaatttgtcaataccccccctctagtaaaactatggtatcagtt
agaaacagagcccatagcagaagcagaaaccttctatgtagatggggcatctaataaagagaccaaaaaaggaaaagcag
gatatgttactgacaaaggaagacaaaaagttgtctccctaactgaaaccacaaatcagaaggctgagttacatgcaatt
tacttagctttacaggattcaggatcagaagtaaacatagtaacagactcacagtatgcattaggaattattcaagcaca
accagataagagtgagtcagagttagtcagtcaaataatagagcaattaataaaaaaggaaaaggtctacctgtcatggg
taccagcacacaaggggattggaggaaatgaacaagtagataaattagtcagtgctggggtcagaaaaatactgttttta
gatgggatagataaggcacaggaggaacatgaaaaatatcacaacaattggagagcaatggctagtgattttaatctgcc
acctgtagtagcaaaagaaatagtagctagctgtgataagtgtcagctaaaaggggaagccatgcatggacaagtagatt
gtagtccagggatatggcaattagactgtacacatttagaaggaaaaactatcctggtagcagtccatgtagccagtggg
tacctagaagcagaagttatcccagcagaaacaggacaagaaacagcctacttcatactaaagttagcaggaagatggcc
agtaaaaacaatacatacagacaatggccccaatttcatcagtgccatggttaaggcagcctgttggtgggcaggtatcc
aacaggaatttggaattccctacaacccccaaagtcagggagtagtagaatctatgaataaagagctaaaaaagatcata
agccaggtaagagatcaagctgaacatcttaagacagcagtgcaaatggcagtattcatccacaattttaaaagaaaagg
ggggattgggggatacagtgcaggggaaagaataatagacataatatcaacagacatacaaactagagaattacaaaaac
aaattataaaaattcaaaatttccgggtttattacagggacagcagagacccagtttggaaaggaccagcaaagctactc
tggaaaggtgaaggggcagtagtcatacaagacgatagtgaaataaaggtagtacccagaagaaaagcaaagatcattag
ggactatggaaaacagatggcaggtgatgattgtgtggcaggtagacaggatgaggattaacacatggaaaagtttagta
aagtaccatatgcatgtttcaaagaaagccaaaagatggttttatagacatcactttgaaagcaggcatccaagagtaag
ttcagaagtacacatcccactagagaaagctgaattagtaataacaacatactgggggctgcagccaggagaaagagatt
ggcatctgggtcagggagtctccatagaatggaggcaggggaggtataggacacaaatagaccctggcctggcagaccga
ctgatccatatatattattttgattgtttttcagaatctgccataagaaaagccatattaggacataaaattagccctag
gtgtaactatcaagcaggacataacaaggtaggatctctacaatatttggcactaacagctttaatagctccaaagaaaa
caaagccgcctttgcctagtgtcaagaagctagtggaagacagatggaacaacccccagaagaccaggggccacagaggg
agccatacaatgaatggacactagagcttttagaggagcttaagaatgaagctgttagacatttccctaggccatggctc
catggcttaggacagcatatctataacacctatggggatacttgggagggagttgaggctataataaggatattgcaaca
actactgtttatccatttcagaattgggtgccagcatagcagaataggcattatgcgacagagaagagtacgaaatggag
ctagtagatcctaacttagagccctggaaccacccaggaagcaagccttcaactccttgtaccaaatgttattgtaaacg
gtgttgctttcattgttactggtgcttcgtaacaaaaggcttaggcatctcctatggcaggaagaagcggagacagcgac
gaagagctcctcaaggcagccagactaatcaagcttctctatcaaagcagtaagtagtgcatgtaatgcaatctttagta
acattagcaatagtagcattagtagtagcagcaatattagcaatagttgcgtggtccatagtattaatagaatataggaa
aatattaagacaaaggaaaatagacaggttaattgatagaataagagaaagagcagaagacagtggcaatgagagtgagg
gggatgcagaggaattggcagcatttggggaactggggcttcttattcctgggaatattgataatctgtaatgctacaga
aaatttgtgggtcacagtctattatggggtacctgtgtggaaagaagcaaccactactctattctgtgcatcagatgcta
aatcatatgaaagggaggtacataatgtctgggctacccatgcctgtgtacccacagatccaaatccacaagaagtagtt
ctggaaaatgtaacagaaaattttgatatgtggaaaaataacatggtagaacaaatgcatacagatataatcagtttatg
ggatcaaagcctaaagccatgtgtgaagttaaccccactctgtgttactttaaattgtagtaatgctaatgccactgcca
ataatgccactgccaatggcactcaaaacaacaccctggaggaagagccaggggcaatacaaaactgttctttcaatatg
accacagaaataagagataaacagctgaaagtacatgcacttttttatagacttgatatagtgccaatcggtaatggcag
tgaaacatacaggctaataaattgtaatacctcaaccattacataggcttgtccaaaggtatcttgggatccaattccca
tacattattgtactccagctggttatgcgcttctaaagtgtaatgataaaaagttcaatgggacggggccatgccagaat
gtcagcacagtacaatgtacacatgggattaaaccagtggtatcaactcaattgttgttaaatggcagcctagcagaaga
agatataataattagatctcaaaacatctcagataatacaaaaaccataatagttcatcttaatgaatctgtacagatta
actgtacaagacccaacaataatacaagaaaaagtatacagttaggaccaggacgggcattttatgcaacaggagacata
ataggggacattagaaaggcacattgtaatgttagtggagcacaatggagtaaaacggtagaacaggtaaaggcaaagtt
aagatctcaattcaataaaacaataaaatttaactcatcctcaggaggggacccagaaattacaatgcatagtttcaatt
gtagaggagaatttttctactgcaatacatcaggactgtttaatgatacaatatccaatgatactattattctcccatgt
aaaataaaacaaattgtaaacctgtggcaggaagtgggacgagcaatgtatgccgctcccattgaaggaaacattacctg
taactcaaatattacaggtctactattgacaagagatggtggtcttaatgagactaatcagactgaaaccttcagacctg
ggggaggaaatatgaaagacaattggagaagtgaattatataaatataaagtggtagaaattgaaccactaggagtagca
cccaccagggcaaaaagacaagtggtgacgagagaaaaaagagcagtgggaataggagctttgttccttgggttcttggg
agcagcaggaagcactatgggcgcggcgtcagtgacgctgacggtacaggccagacaattattgtctggaatagtgcaac
agcaaaacaacttgctgcaggctattgaagcgcaacagcatctgttgcagctcacagtctggggcattaaacagctccag
gcaagagtcctggctgtggaaagatacctaaaggatcaacagctcctagggctttggggctgctctggaaaactcatctg
cgccactaatgtgccctggaactctagttggagtaataaatctcaggaggaaatttggaataacatgacctggatgcagt
gggaaaaagagattagcaattactcacatgcaatatacaggttaattgaagattcgcagaaccagcaggaaaagaatgaa
caagaattattggcattggacaaatgggcaagtctgtggaattggtttgacatatcaaaatggctgtggtatataagaat
attcataatgatagtaggaggcttgataggcttaagaatagtttttgctgtgctttctatagtaaatagagttaggaagg
gatactcacctttgtcattacagacccatatcccaagcccgagggaacccgacaggcccgaaggaatcgaagaaggaggt
ggagagcaaggcaaagtcagatccgtgcgattagtgaacggattattgacacttatctgggacgacctgaggagcctgtg
ccttttcagctaccaccgcttgagagacttactcttggttgtaacgaggattgtggaacttctgggacgcagggggtggg
aagccctcaaatattggtggaatctcctacagtattggagtcgggaactaaagaatagtgctattagcttgcttaatacc
acagcaatagtagtagctggggggacagatagaattttagaagctttgcaaagaattggtagagctgttctcaacgcacc
tagaagagtaagacagggattggaaagggctttgctataaaatgggtggcaagtggtcaaaaagcagtatagttggatgg
cctgagataagggaaagattgagacgagcccctccagcagcagaaggggtgggagcagtgtctcaagacttagaaaaccg
gggggcaattacaagcagcaatactagagccaataatcctgccttggcctggctggaagcgcaagaggaagaggaagtag
gctttccagtcaggcctcaggtacctttaagaccaatgacttttaagggagctttcgatcttagccactttttaaaagaa
aaggggggactggaagggttaatttattccaagaaaagacaagagatccttgatctgtggatctaccacacacaaggtta
cttccctgattggcagaactacacaccagggccaggggtcagattgccactgacctttgggtggtgcttcaagctagtac
cagttgacccagtggaggtagaaaaggccaatgaaggagagaacaactgcttgctacaccccatgagccaacatggaatg
gaagatgaagacagagaagtactgatatggaagtttgacagccgcctggcgctaagacacttagccagagagaaacatcc
agagtggtataaagactgagactgctgacacagagactgctgacacagaagaatctaaagggactttccgctggggactt
tccagagggcgggccagagggcgtgactggggagtggctcaccctcagatgctgcatataagcagccgcttttcgcctgt
actgggtctctctagttggaccagattagagcctgggagctctctggctagctagggaacccactgcttaagcctcaata
aagcttgccttgagtgcttcaagtagtgtgtgcccatttgttgtgtgactctggtaactagagatccctcagaccattct
agtcagtgtggaaaatctctagca

>13_cpx.CM.1996.96CM_1849
aaatctctagcagtggcgcccgaacagggacgtgaaagcgaaagctaaccagagaagttctctcgacgcaggactcggct
tgctgagcgcgcacagcaagaggcgaggggcggcggctggtgagtacgccaaaaattttttgactagtggaggctagaag
gagagagatgggtgcgagagcgtcagtattaagcgggggaaaattagataaatgggaaaaaattcggttgaggccagggg
gaaagaaaagatacagaatgaaacatctagtatgggcaagcagggaactggagagatttgcacttaaccctggcctttta
gaaacaacagaaggttgtcaacaaatactgagacagttgcaaccatctctccagacaggatcagaggagcttaaatcatt
atataatacagtagcaaccctctattgtgtacaccaaaggatagaggtaaaagacaccaaagaagctctagaggaagtgg
aaaaggtacaaaatagcagccagcaaagaacacagcaggcagcaaagaatgaaggaaacagcaaccaagtcagtcaaaat
tatcctatagtgcagaatgcacaagggcaaatggtgcaccagtccatatcacctagaactttgaatgcatgggtaaaagt
agtagaagaaaaggccttcagtccagaagtgatacccatgttttcagcattatcagaaggggctaccccacaagatttaa
acaccatgctaaacacagtgggggggcatcaagcagctatgcaaatgctaaaggatactatcaatgaggaagctgcagaa
tgggataggatgcatccacaacgagcagggccttttccaccaggccaaataagagaaccaaggggaagtgatatagcggg
aaccactagtaccctgcaggaacaaataacatggatgaccaataacccacctatcccagtgggagaaatttataaaagat
ggataatcctggggttgaataaaatagtaagaatgtatagccctgtcagcattctggacataagacaagggccaaaagaa
ccctttagagattatgtagacaggttctttaaaactttgagagctgagcaagctacacaggatgtaaaaaactggatgac
agacaccttgttggtccaaaatgcgaatccagattgtaagaccatcttaagagcattaggaccaggggctacactagaag
aaatgatgacagcatgtcagggagtgggaggacccggccataaagcaagagttttagctgaagcaatgagccaggcctca
agtgcagcagcagcagccataatgatgcagaaaagcaattttaagggcccaaaaagaattattaagtgtttcaactgtgg
cagggaaggacatctagccagaaattgcagggcccctaggaaaaagggctgttggaaatgtggaaaggagggacatcaaa
tgaaagactgcatggaaagacaggctaattttttagggaaaatctggccttccaacaaagggaggccagggaattttctt
cagagcagaccaggaccaacagccccaccagagagcagaccagagccaacagccccaccagcagagagcttcgggttcgg
agaggagatagccccctcccagaagcaggaaccgaaggagacatatcccttagctgccctcaaatcactctttggcagcg
acccatagtcatagtaaagataggggaacagctaatagaagccctattagatacgggagcagatgatacagtattaaaag
aaataaatttgccaggaagatggaaaccaaaaatgatagggggaattggaggttttatcaaagtaagacagtatgataac
atgagcatagaaattgagggaaaaaaggctataggtacagtattaataggacctacacctgtcaacataattggaagaaa
tatgttgactcagattggttgtactttaaattttccaattagtcctattgaaactgtaccagtaaaattaaagccaggaa
tggatggcccaaaagttaaacaatggccattgacagaagaaaaaataaaagcattaacagaaatctgtaaagaaatggaa
aaggaaggaaaaatttcaaaaattggacctgaaaatccatataacactccagtgtttgctataaagaaaaaagacagtac
taaatggagaaaactagttgattttagggaactcaataaaagaactcaagacttctgggaagttcaattaggaataccac
atccagcaggtttaaaaaagaaaaaatcagtaacagtactggatgtgggggatgcatatttttcagtccctctagataaa
gacttcaggaagtatactgcattcactatacctagtgtaaacaatgagacaccagggattagatatcaatacaacgtgct
gccacaaggctggaaaggatcaccagcaatattccagtgtagcatgacgaaaatcttagaaccatttagaacacaaaacc
cagaaatagtgatttatcaatacatggatgacctgtatgtgggatctgacttagaaatagggcagcatagagaaaaggta
gaggaattaagaagacatctgttgaggtggggatttaccacaccagataagaaacatcagaaagaacctccattcctttg
gatgggatatgagctccatcctgacaaatggacagtacaagctatacagttgccagacaaggacagctggactgtcaatg
atatacaaaagttagtgggaaaactgaattgggcaagtcaaatctatccaggaattaaagtaaagcaactatgtaaactc
cttaggggggccaaagcactaacagacatagtatcactgactacagaagcagaattagaattggcagagaacagagaaat
tttaaaagaacctgtacatggagtctattatgacccagagaaagaattaatagtggaaatacagaaacaaggacaagaac
aatggacatatcaaatttatcaagagccatacaaaaacctgaaaacaggaaaatatgcaaaaagggggtctgcccacaca
aatgatgtaaaacaactaacagaagtagtgcaaaaggtggccacagaaagtatagtaatatggggaaagcttcctaaatt
taaactccccatacgaaaagaaacatgggaagtatggtggacagactattggcaggccacctggattcctgattgggaat
ttgtcaatacccctcctctagtaaaactgtggtatcggttagaaacagaacccatactaggagcagaaacttactatgta
gatggggcagctaatagggaaacaaaattaggaaaggcaggatatgttactgacagaggaaaacaaaaaattattaccct
aactgaaacaacaaaccaaaagactgaattgcaagcaattcagctagctttgcaggattcaggatcagaagtaaacatag
taacagactcacagtatgcattaggaatcattcaagcacaaccagataggagtgaatcagagttagtcaatcaaataata
gaacagctaataaagaaggaaaaggtctacctgtcttgggtaccagcacacaaagggattggaggaaatgaacaagtaga
taaattagttagtaatggaatcaggaaagtgctatttttggatggcatagacaaagcccaagaagatcatgaaagatatc
acagcaattggagaacaatggctagtgattttaatctaccacctgtagtagcaaaagaaatagtggccagttgtgataaa
tgccagctaaaaggggaagccacgcatggacaagtagactgtagtccaggaatatggcaattagattgtacacatttaga
aggaaaaattatcctggtagcagtccatgtagccagtggctatatagaagcagaagttatcccagcagaaacaggacagg
aaacagcatactttatattaaaattagcaggaagatggccagtaaaagtaatacacacagacaatggcagcaattttacc
agtgctgcagtaaaagcagcatgttggtgggcaaatatcacacaagaatttggaattccctataatccccaaagtcaagg
agtagtggaatctatgaataaagaattaaagaaaatcatagggcaggtcagggagcaagctgaacaccttaagacagcag
tacaaatggcagtattcattcacaattttaaaagaaaaggggggattggggggtacagtgcaggggaaagaataatagac
ataatagcaacagacttacaaacaaaagaactacaaaaacaaattataaaaattcaaaattttcgggtttattacaggga
cagcagagacccaatttggaaaggaccagcaaaactgctctggaaaggtgaaggggcagtagtaatacaagacaatagtg
aaataaaagtagtaccaagaagaaaagcaaagatcattagagattatggaaaacagatggcaggtgatgattgtgtggca
ggtagacaggatgaggattaatacatggaaaagtttagtaaaataccatatgcatgtttcaaagaaagctggaagatggt
tttatagacatcactatgacagcaatcatccaaaaataagttcagaagtacacatcccactaggggatgctaaattagta
gtgacaacatattggggtctgcatacaggagaaagaaaatggcatttgggtcaaggggtctccattgaatggaggctgaa
aagatacagaacacaagtagaccctggcctggcagaccaactaattcatacgcattactttgattgtttttcagactctg
ccataaggaaagccatattaggacatagagttagccctaggtgtgactatcaagcaggacataataaggtaggatctcta
caatatctggcattaacagcattaatacacccaaaaaagataaagccgcctttgcctagtgtgaaaaaattagtagagga
tagatggaacaagccccagaagaccagggaccacagagagaaccaaacaatgaatggacactagagcttttggaggagct
taaacatgaagctgttaaacattttcctaggccttggcttcatggattaggacagcatatctataacacttacggggata
cttgggaaggagttgaagctataacaagaatgctacaacaactactgtttattcatttcagaattgggtgccaacatagc
agaataggtgttgtgcgacaaagaagaggtagaaatggatccagtagatcctaaaatagagccctggaaccagccaggaa
gtcagcctaaaactccttgtaccaagtgttattgtaaaaagtgttgctttcattgtcaagtttgcttcataacaaagggc
ttaggcatctcctatggcaggaagaagcggagacagcgacgaagtgcttctcacaacagtcagaatcatcaagatcttat
accaaaacagtgagtataattaaatagtattgtaatgaatgctttaccaataataagcatagtagcattaatagtagcat
ttattttagcagtagttgtgtggaccatagcatatatagaatatagaaagctggtacatcagaagaaaatagaaaagtta
ttggatagaataagggagagagcagaagacagtggaaatgagagcgagggggatacagatgacttggcaaaacttgtgga
aatggggaactttgatccttgggttggtgataatttgtagtgcctcaaataacttgtgggtcacagtttattatggggtt
cctgtgtggagagatgcagagaccaccctattttgtgcatcagatgctaaggcatattctacagaaaaacataacgtctg
ggctacacatgcctgtgtacccacagaccccaacccacaagaaataaatttaggcaatgtgacagaaaactttaacatgt
gggaaaacaatatggtagagcagatgcatacagatataattagtatatgggatcaaagcctaaagccatgtgtaagttta
acccctctctgcgttaccttaaattgtaataacatcactagtgatagcagcatcaatagcagcaccatacaggggagaga
agaaataaaaaactgctcttataatatgaccacaggagtaggcgataggagacagaaagtatactcacttttctatagag
ttgatatagaaccaattgagggaaatagtaatagtggtaatagtagtagtagtgaatatagattaataagttgtaatacc
tcagtcattaaacaagcttgtccaaaggtaacctttgagccaattcccatacattattgtgccccggctggttttgcgat
tctaaagtgtaatgatgaggagttcaatggaacagggccatgcaggaatgtcagctcagtacaatgcacacatggaatca
agccagtagtatcaactcaactgctgttaaatggcagcctagcagaaggagaaataaagattagagctaaaaacttctca
gacaatgttggaaacataatagtacagcttgctacgcctgtaagaattaattgtaccagacctaacaacaatacaagaaa
aagtatacggataggaccaggacaagcattctatgcaacaggggatataataggagatataagacaggcacattgtaaca
tcagtagacaaaaatggaataacaccttacaacaggtagctgcacagttaagaaaatatttgaaagataatacaacaata
atctttgctaatccctcaggaggggatttagaagttacaacacatagttttaattgtggaggagaatttttctattgcaa
tacatcagccctgtttaatagcacttgggaaaatgacactgtcagcacgcaagggtcaaatgacacagggtcaaatgaca
ctataactctcccatgcagaataaagcaatttgtaaacatgtggcagagagtaggacaagcaatgtatgcccctcccatc
caaggaataataaggtgtgaatcaaacattacaggactactattatcaagagatggtggtgtgggtaataataggacaaa
tgagacattcagacctggaggaggaaatatgaaagacaattggagaagtgaattatataagtataaagtagtaaaaattg
aaccattaggagtagcacccagcagagcgaggagaagagtggtggcaagagaaaaaagagcagtagttggactaggggct
gtcttccttgggttcttaggagcagcaggaagcactatgggcgtggcgtcactaacgctgacggtacaggccagacaatt
attgtctggcatagtgcaacaacagaacaatctgctgatggctatagaggctcaacagcatctgttgaaactcacggtct
ggggcattaaacagctccaagcaagaatcctggctatagaaagatacctaaaggatcaacagctcctaggaatttgggga
tgctctggaaaactcatctgcaccactaatgtgccttggaactctagctggagtaataaatctcagagtgaaatatggga
taacatgacctggctgcaatgggataaagaagttagcaattacacagaaatgatatataggctacttgaagaatcgcaga
accagcaggaaaagaatgagcaagacttattggcattggaccagtgggcaagtctgtggaattggtttagtatatcaaaa
tggctgtggtatataaaaatatttataatgatagtaggaggtttaataggtttaagaatagtttttgctgtgctttctat
agtaaaaagtgttaggcaggggtactcacctttgtcatttcagacccttacccatcccaagagggaaccagacaggcccg
aaagaatcgaagaaggaggtggagagcaagacagagacagatccattcgattggtcagcggattcttagcacttgcctgg
gacgatctgcggagcctgtgcctcttcagctaccaccgcttgagagacttcatcttgattgcaacgaggactgtggaact
tctgggacacagcagtctcaagggactgagactggggtgggagggcctcaaatacctgtggaatctcctggtatattggg
gtcgggaactaaaaattagtgctattaccttgcttgatagtacagcaattgcagtagctgagtggacagataggattata
gagacaggacaaagaattgggagaggcattctccacatacctagaaggatcagacagggcttcgaaagggctttacaata
acatgggtggcaagtggtcaaaacgtagcacagtgggatggccagctgtaagggaaagaatagcagcaacaggagtagga
gcagtatctcaagatttagataggcatggagccgtcacaagcagtaatctagcaaataaggattacgtctggctagaagc
acaagaggaaggggaagtgggctttccagtcaaacctcaggtaccattaagaccaatgacttataaaggagcttttgatc
ttggcttctttttaaaagaaaaggggggactggatgggctaattcactccaagaaaagacaagacatccttgacctgtgg
gtctatcatacacaaggctacttccctgattggcaaaactacacaccagggccgggggtcagatacccactgtgttttga
atggtgcttcaagttagtaccaattgatcccaaagaagtagaggaggccaatgaaggagaaaacaactgcctgctacacc
caatgagccagcatggaatagaggatgcagaaagagaagtattaatgtggaagtttgacagttccctagcacgaaaacac
atagcccgagagctgcatccggagttctacaaagactgctgacaagagattttacatccgttggggactttccagggcgg
tgtggcctgggcgggactggggaatggctaacccta

>14_BG.ES.1999.X397
ttgtgtgactctggtaactagagatccctcagaccactctagatagtgtaaaaatctctagcagtggcgcccgaacaggg
acttgaaagcgaaagttaacagggactcgaaagcgaaagttccagagaagttctctcgacgcaggactcggcttgctgaa
ggtgcacacagcaagaggcgagagcggctactggtgagtacgccataaattttgactagcggaggctagaaggagagaga
tgggtgcgagagcgtcagtattaagcgggggaaaattagatgcatgggaaaaaattcggctgaggccagggggaaagaaa
aaatatagaatgaaacatttagtatgggcaagcagggagctggaaagatttgcacttaaccctgaccttttagaaacagc
agagggttgtcaacaaataatgagacagttgcaaccagctctccagacaggaacagaggagattagatcattatttaata
cagtagcaacactctattgtgtacatcaaaagatagatgtaaaagacaccaaagaagctctagaggaagtggaaaaggca
cagaagaaaagtcagaaacagcggcaggcagcaatggacgaaggaaacaacagccaagccagccaaaattatcctatagt
acagaatgcacaagggcaaatggtacatcaggccatatcacccagaactttaaatgcatgggtaaaagtagtagaagaaa
aggccttcagtccagaagtaatacctatgttttcagcattatcagaaggagccaccccgcaagatttaaataccatgcta
aacacagtaggggggcatcaggcagctatgcaaatgctaaaggatactatcaatgaggaagctgcagagtgggacaggat
acacccacaacaggcagggcctatcccaccaggccagataagagaaccaaggggaagtgatatagcaggaactactagta
ccctgcaggaacaaataagatggatgaccagcaatccacctatcccagtgggagacatttataaaagatggataatcctg
ggattaaataaaatagtaagaatgtatagccctgtcagcattttggatataagacaagggccaaaagaaccttttagaga
ttatgtagataggttctttaaaactttaagagctgaacaagctacacaggaagtaaaaggctggatgacagacaccttgt
tggtccaaaatgcgaacccagattgtaagaccatcttaagagcattaggaccaggagctacactagaagaaatgatgaca
gcatgtcagggagtgggaggacccggtcacaaagcaagagttttagctgaggcaatgagccaggcatcaggggcaacaat
aatgatgcaaaaaagcaattttaagggtcaaagaagaaacattaagtgtttcaactgtggcaaggaaggacacctagcta
gaaattgcagggcccctagaaaaaagggctgttggaaatgtggaagggagggacatcaaatgaaagactgcacagaaagc
aaggctaattttttagggaaaatttggccttccaacaaggggaggccagggaattttctccagaacaggctagagccaac
agccccacccgcagagagcttggggttcggagaggagatagccccctccccgaagcaagagccgaaggaaaaggagatat
accccttagcctccctcaaatcactctttggcagcgacccctagtcacagtaagaatagggggacagctaatagaagccc
tgttagatacaggagcagatgatacagtgttagaagatataaatttaccaggaaaatggaagccaaaaatgataggggga
attggtggttttatcaaagtaagacagtatgatcaaatacttatagaaatttgtggaaaaaaggctatagggacagtatt
agtaggacctacacctatcaacataattgggagaaatatgttgacacagattggttgtactttaaattttccaattagcc
ctattgaaactgtaccagtaaaattaaagccaggaatggatggtccaaaggttaaacaatggccattgacagaagaaaaa
ataaaagcattaacagacatttgtacagaaatggaaagggaaggaaaaatttcaaaaattggacctgaaaatccatataa
cactccaatatttgccataaagaaaaaagacagtactaaatggagaaaattggtagatttcagagagctcaataaaagaa
ctcaagacttctgggaggtccaattaggaatacctcatccctcggggttaaaaaagaataagtcagtaacagtgctagat
gtgggggatgcatacttttcagtgcccttagatgaaagctttagaaagtatactgcattcaccatacctagtacaaataa
tgagacaccaggaattagatatcagtacaatgtgcttccacagggatggaaaggatcaccagcaatatttcaagctagca
tgacaaaaatcttagaaccttttagaagaaaaaatccagaaatagtgatctaccaatatgtggatgatttatatgtagga
tctgacttagaaatagggcagcatagagcaaaaatagaggagttaagaaaacatctgttaagctgggggtttaccacacc
agataaaaaacatcagaaagaacctccattcctttggatgggatatgagctccatcctgacaaatggacagtacaaccta
tacagctgccagacaaagaaagctggactgtcaacgacatacaaaagttggtgggaaaactaaattgggcaagccagatt
tatccagggattaaagtaaaacaactatgtaaactccttaggggagctaaagcactaacagacatagtaccactaactgc
agaagcagaattggaattggcagagaacagggagattctgaaagaacctgtacatggagtctattatgaaccatcaaaag
agttaatagcagaagtacagaaacaagggctagaccagtggacataccaaatctatcaagagccatacaaaattctgaaa
acaggaaaatatgcaaaaagggggtctgcccacactaatgatgtaaaacaattaacagaagtagtacaaaaaatagccac
agagagcatagtaatatggggaaaaactcctaaatttaaactacctatacgaaaagaaacatgggaagtatggtggacag
aatattggcaagccacctggattcctgactgggaatttgtcaatacccctcctctagtaaaattatggtatcgactagaa
acagaacccatagcaggagcagaaacatattatgtagatggggcagctaatagggaaacaaaattaggaaaggcaggata
tgttactgacaaaggaaaacaaaaaattattaccctaactgaaacaacaaaccaaaaggctgaattacaagcaattcaga
tagctttgcaggactcaggatcagaagtaaacatagtaacagattcacagtatgcattaggaattattcaagcacaacca
gataggagtgaatcagaagtagtcaatcaaataatagaacagctaataaaaaaggaaaaggtctacctgtcatgggtacc
agcacacaaagggattggaggaaatgaacaagtagataaattagtcagtagtggaatcaggaaggtattatttttagatg
gtatagataaagcccaagaagagcatgaaaaatatcacagtaattggagagcaatggctagtgattttaacctgccacct
gtagtagcaaaagaaatagtggccagctgtgataaatgtcagctaaaaggggaagccatgcatggccaagtagactgtag
tccaggaatatggcagttagattgtacacatttagaaggaaaaattatcctggtagcagtccatgtggccagtggctata
tagaagcagaagttatcccagcagaaacaggacaggaaacagcatacttcatactaaaattggcaggaaggtggccagtg
aaaataatacatacagataatggcagcaatttcaccagtgctgcagtaaaggcagcatgttggtgggcaaatatcacaca
agaatttggaattccctacaatccccaaagccaaggagtagtggagtctatgaataaagaattaaagaaaatcatcgggc
aggtcagggatcaagctgaacaccttaagacagcagtacaaatggcagtattcattcacaattttaaaagaaaagggggg
attggggggtacagtgcaggggaaagaataatagacataatagcatcagatatacaaacaaaagaactacaaaatcaaat
tacaaaaattcaaaattttcgggtttatttcagggacagcagagacccaatttggaaaggaccagcaaaactactctgga
aaggtgaaggggcagtagtaatacaagacaataacgaaataaaggtagtaccaaggagaaaagcaaagatcattagggat
tatggaaaacagatggcaggtgatgattgtgtggcaggtagacaggatgaggattagaacatggaacagtttagtaaaac
atcatatgtatatctcaaagaaagctaagggctggatttatagacatcactttgaaagcgggcatccaaaagtaagttca
gaagtacacatcccattaggagatgctaaactagtggtaagaacatattggggtctgcatacaggagaaaaagattggca
tttgggtcatggggtctccatagaatggaggcagagaagatatagctcacaaatagatcctgacttagcagaccaactaa
ttcatctgcactattttgactgtttttcagactctgcaataaggaaggcattattaggagaattagttagtcctaggtgt
gaatatcaagcaggacatactaaggtaggatctctacaatatttggcactgaaagcattagtaacaccaacaaaggcaaa
gccacctttgcctagtgttaggaaattaacagaagatagatggaacaagccccagaggaccaggggccacagagggaacc
ctacaatgaatgggcattagaactgttagaagagcttaaaaatgaagctgttagacattttcctaggccctggctccatg
gcttaggacagtatatctataacacttatggggatacttgggaaggagttgaagccataataagaatactacaacagcta
ttgtttatccatttcagaattgggtgccaacatagcagaataggcattattccacggagaagagtaagggatggacccgg
tagatcctaatctagagccctggaatcatccagggagtcagcctaaaactgcttgcaccaaatgctattgtaaaatatgt
tgctggcattgtcaagtttgctttctgaacaaaggcttaggcatctcctatggcaggaagaagcggaagcaccgacgagg
acctcctcaaagcagtaaggatcatcaaaatcctgtaccaaagcagtaagtagtaataattagtatatgtaatgcaatca
ttagaaatatctgcaatagtaggactaatagtagcaggcatagcagccataattgtgtggatcatagtttttatacaata
taaggaaataagaaaacagaagaaaatacaaaggatacttgatagaataagagaaagagcagaagacagtggaaatgaaa
gcgaaggggacacagaggaattggcaatccttgtggaaatgggggactttgatccttgggttggtgataatttgtagtgc
ctcaaatgacttatgggtcacagtctattatggggtacctgtgtggaaagaagcaaccaccactctattctgtgcatcag
atgctaaagcatatgatgcagaggtacataatgtttgggccacacatgcctgtgtacccacagaccccaacccacaagaa
gtagcattggaaaatgtgacagaaaactttaacatgtgggaaaataacatggtagaccagatgcaggaggatataatcag
tttatgggatcaaagcctaaaaccatgtgtagaactaaccccactctgtgttactttaaattgcactgattttaatacca
ctagtaataatgctactaataccattaatagtagcctagaaatgatggagaaaggagaaatgaaaaactgctctttcaat
atcaccacaagcctaagagataagataaagaaagaatatgcacttttttataaccttgatgtagtacaaatggacaatga
taatagaagctataggttgacaagttgtaacacctcaatcattacacaggcctgtccaaaagtatcctttacgccaattc
ccatacattattgtgccccggctggttttgtgattctaaagtgtaacaataagacgttcaatggaacaggaccatgtaca
aatgtcagcacagtacaatgtacacatggaattaggccagtagtatcaactcaactgctgctaaatggcagtctagcaga
agaagaaatagtaattaggtctaaaaacttgagtgacaatactaaaaccataatagtacagctgaaagaccctatagaaa
ttaattgtacaagacccaacaacaatacaagaaaaagaataactatgggaccagggagagtattgtatacaacaggacaa
ataataggagatataagaaaagcacattgtaacattagcaaaacaaaatggaataacactttaggacagatagttagaaa
attaagaaaacaattcatgaataaaacaatagtctttcagcgttcctcaggaggagacccagaaattgtaatgcacagtt
tcaattgtggaggagaatttttttactgtaatacaacacaattgtttaacagtacttggaggtctaatagtacttggaat
gataatacagagacaaataacactgacctaatcacactcccatgcagaataaaacaaattgtaaacatgtggcagaaagt
aggaaaagcaatgtatgcccctcccatcagcgggcaaattagatgctcatcaaatattacagggctgctattaataagag
atggtggtagtaacaataacaatactaacgcgtccgagatctttagacctggaggaggaaatatgaaggacaattggaga
agtgaattatataaatataaagtagtaaaaattgaaccattaggagtagcacccaccagggcaaagagaagagtggtgca
gagagaaaaaagagcagtaggaataggagctttgctctttgggttcttgggagcagcagggagcactatgggcgcagcgt
caatgacgttgacggtacaggccagacaactactgtctggtatagtgcaacagcagaacaatctgctgagggctattgag
gcgcaacagcatatgttgcaactcacagtctggggcataaagcagctccaggcaagagtcctggctgtggaaagatacct
aaaggatcaacagctcctggggatttggggttgctctggaaaactcatttgcaccactactgtgccttggaatgctagtt
ggagtaataaatctctggaggacatttggaataacatgacctggatgcagtgggaaaaagaaattgacaattacacagac
ttaatatacaccttaattgaacaatcacagaaccagcaagaaaggaatgaacaagaattattggaattggataaatgggc
aagtttgtggaattggtttagcataacaaaatggctgtggtatataaaaatatttataatgataataggaggtttaatag
gtttaagaatagtttttgctgtgctttctataataaatagagttaggaagggatactcaccattgtcattccagaccctt
acccaccaccagagggaacccgacaggcccggaagaatcgaagaagaaggtggagagcaagacaaagacagatccattcg
attagtgagcggattcttagcgcttgcgtgggacgatctacggagcctgtgtctcttcagctaccaccgcttgagagact
tcatcttaattgcaacgaggacagtggaactcttgggacgcagcagtctcaagggactgagactggggtgggagggcctc
aaatatctgtggaatcttctgttatattggggtcaggaactaaagaatagtgccattaatttgcttgatacagtagcaat
aatagtagctaactggacagatagagctatagaagtagtgcaaagagttggtagggctattctcaatatacctgtaagaa
tacgacaaggctttgaaagagctcttttataacatggggggcaagtggtcaaaagggtgggccgaggtaagggaaagaat
gagacgaacccctccagtagcacccccagcagcagtaggagtaggagcagtatctcaagatttagctaagcatggagcaa
ttacaagcagcaacacagcagccaataatcctgattgtgcctggctggaagcacaagaagaagactcagaggtaggcttt
ccagtcagaccacaggtacctctgagaccaatgacttttaagggtgcttttgatctcagcttctttttaaaagaaaaggg
gggactggatgggctaatttactccaagcaaagacaagatatccttgacctgtgggtctataatacacaaggattcttcc
cagattggcagaactacacaccagggccagggactagatatccactgacctttgggtggtgcttcaaactagaaccaatg
gatccagcagagatagaggaagctactaaaggagagaataacagtttattacaccccatctgccagcatggaatggagga
tgcagacaatgaggtgctgatatggagatttgacagtagcctagcacggagacacatagcccgagagctgcatccgaatt
tctacaaagactgctgacaccgctgctgacacagaagttgctgacaaggggactttccgcctgggactttccggggaggc
gcggcctgggaggggctggggagtggccaaccttcag

>15_01B.TH.1999.99TH_MU2079
taattcgcccttaaatctctagcagtggcgcccgaacagggaccttaaagtgaaagttaatagggactcgaaagcgaaag
ttccagagaagttctctcgacgcaggactcggcttgctgaggtgcacacagcaagaggcgagagcggcgactggtgagta
cgccaatttttgactagcggaggctagaaggagagagatgggtgcgagagcgtcagtattaagtgggggaaaattagatg
catgggaaaaaattcggttacggccaggaggaaagaaaaagtataaactaaaacatctagtatgggcaagcagagagttg
gaaagattcgcaattaaccctagccttttagaatcagcagaaggatgtcaacaaatactagaacagttacagtcaactct
caagacaggatcagaagaacttaaatcattatataatacagtagcaaccctctggtgcgtacaaaacaggatagaggtaa
aagacaccaaggaagctttagataagatagaggaagtacaaaataagaaccagcaaaagacacagcaggcagcggctggc
acaggaagcagcagcacagtcagccataattaccctatagtgcaaaatgcacaagggcaaatggtacatcagcctgtatc
acctagaactttgaatgcatgggtgaaagtagtagaagaaaaaggttttaacccagaagtaatacccatgttctcagcat
tatcagagggagccaccccacaagatttaaatatgatgctaaatatagtggggggacaccaggcagcaatgcaaatgtta
aaagaaaccatcaatgaggaagctgcaaaatgggatagagtacacccagtacatgcagggcctattccaccaggccagat
gagggaaccaaggggaagtgacatagcaggaactactagtacccttcaagaacaagtaggatggatgacaagcaatccag
ctatcccagtgggagacatctataaaaggtggataatcctgggattaaataaaatagtaagaatgtatagccctgttagc
attttggacataagacaagggccaaaagaacccttcagagactatgtagataggttctataaaactctcagagcagaaca
agctacacaggaggtaaaaaattggatgacagaaacattgctagcccaaaatgcgaatccagactgtaagtccattttaa
aagcattaggatcaggagcttcattagaagaaatgatgacagcatgtcagggagtgggaggacctagccataaagcaaga
gttttggctgaggcaatgagccatgtacaacagacaaatgtaatgatgcagagaggcaattttaagggccagaaaagaat
taagtgcttcaactgtggcaaagaaggacacctagccaggaattgcagggcccctagaaaaaagggttgttggaaatgtg
gggaggaaggacatcaaatgaaagactgcactgagagacaggctaattttttagggagactttggccttccaagggaagg
ccagggaattttcctcagagcagaccagagccatcagccccaccagcagagaactgggggatgggggaagagacaacctc
cttactgaagcaggagcagaaagacagggaacatactcctcctttagtttccctcaaatcactctttggcaacgacccct
tgttacaataaaaataggaggacagctgaaagaagctctattagatccaggagcagatgatccagtattagaagatataa
atttcccagggaaatggaacccaaaaatgatagggggaattggaggttttatcaaggtaaggcaatatgatcagatacct
atagaaatttgtggaaaaaaggctataggtacagtgttagtaggacctacacctgtcaacataattggacgaaatatgtt
gactcaacttggttgtactttaaatttcccaattagtcctattgaaactgtaccagtaaaattaaagccaggaatggatg
gaccaaaggttaaacagtggccattgacagaagaaaaaataaaagcattaacagaaatttgtaaagagatggaagaggaa
ggaaaaatctcaaaaattgggcctgaaaatccatacaatactccaatatttgctataaagaaaaaggacagcaccaaatg
gaggaaattagtagatttcagagagctcaataaaaggactcaggatttttgggaagtgcaattagggataccgcatccag
caggtttaaaaaagaaaaaatcagtaacagtactagttgtgggagatgcatatttttcagttcctttagatgaaagtttt
agaaagtatactgcattcaccatacctagtataaacaatgagacaccaggaatcagatatcagtacaatgtgctgccaca
aggatggaaaggatcaccggcaatattccagtgtagcatgacaaaaatcttagagccctttagaaaaaagaatccagaaa
tggttatctatcaatacatggatgacttgtatgtaggatctgatttagaaatagggcagcacagaacaaaaatagaggaa
ctaagagctcatctattgagctgggggtttactacgccagacaaaaaacatcagaaggaacctccattcctttggatggg
atatgaactccatcctgacagatggacagtccagcctatagaactgccagaaaaagacagctggactgtcaatgatatac
agaaattagtgggaaaactaaattgggcaagtcaaatttatgcggggattaaggtaaagcaactgtgtaaactcctcagg
ggagctaaagcactgacagacatagtaccattgactgaagaagcagaattagaattggcagagaacagggagattctaaa
agcccctgtgcatggagcatattatgacccatcaaaagacttagtagcagaagtacagaaacaagggcaggaccaatgga
catatcaaatttatcaagagccatttaaaaatctgaaaacaggaaaatatgccagaaaaaggtctgctcacactaatgat
gtaagacaattaacagaagtggtgcaaaaaatagccacagaaagcatagtaatatggggaaagacccctaaatttagact
acccatacaaaaagaaacatgggaaacatggtggatggagtattggcaggctacctggattcctgaatgggagtttgtta
ataccccacctttagtaaaattatggtaccaattagaaaaagaccccatagtaggagcagagaccttctatgtagatggg
gcagctagtagggagactaagctaggaaaagcagggtatgtcactgacagaggaagacagaaggtagtttccctaactga
gacaacaaatcaaaagactgaattacaagcaatccagttagccttgcgggattcaggatcagaagtaaatatagtaacag
actcacaatatgcattaggaatcattcaggcacaaccagacaggagtgaatcagaagtagtcaaccaaataatagaggag
ctaataaaaaaggaaaaggtctacctgtcatgggtaccagcacacaaaggaattggaggaaatgaacaagtagataaatt
agtcagttcaggaatcaggaaggtgctatttttagatgggatagataaggctcaagaagaacatgaaagatatcacagca
attggagaacaatggctagtgattttaatttgccacctatagtagcaaaggaaatagtggccagctgtgataaatgtcaa
ctaaaaggggaggctatgcatggacaagtagactgtagtccagggatatggcaattagattgcacacatctagaaggaaa
agtcatcctggtagcagtccacgtggccagtggatatgtagaagcagaagttatcccagcagaaacaggacaggaaacag
catactttctgctaaaattagcaggaagatggccagtaaaagtaatacacacagacaacggtagcaatttcaccagcgct
gcaatgaaagcagcctgttggtgggccaatgtccgacaggaattttgggatccctacaatccccaaagtcaaggagtagt
agaatctattaataaggaattaaagaaaatcatagggcaaataagagagcaagctgaacaccttaagacagcagtaccaa
tggcagtattcattcacaattttaaaagaaaaggggggattggggggtacagtgcaggggaaagaataatagacttaata
gcaacagacattccaactaaagaattaccaaaccaatccaaaattcaaaattttcgggtttattacagggacagcagaga
cccaatttggaaaggaccagcaaaactactctggaaaggtgaaggggcagtagtaatacaagacaatagtgatataaaag
tagtaccaagaaggaaagcaaagatcattagggattatggaaaacagatggcaggtgatgattgtgtggcaggtagacag
gatgaggattagaacatggaacagtctagtaaaacatcatatgtatgtctcaaagaaagctaaaaagtggttttatagac
atcattatgaaagccagcatccaaaggtaagctcacaagtacatatcccactagaagaggctagattagtaataaaaaca
tattggggtctgcagacaggagaaaaggattggcatttgggtcatggagtctccatagaatggaggcagagaggatatag
cacacaaatagatcctgaactagcagaccgactgattcatctacaatattttgactgtttttcagaatctgccataagga
gagccatattaggacaagtagttagatatagttgtgattatccatcaggacataacaaggtaggatccctacaatatttg
gcactgaaagcattaacaacacccaaaaggataagaccacctctgcctagggttaagaaattgacagaagatagatggga
caagccccagaagatcaggggccacagagagaaccctacaatggatggccattagaactgttagaggagcttaaaaatga
agctgtaaaattttctaggccctggctccatggcttaggacagtccatctataccaattatggggatacttgggaagggg
ttgaagctatagtaagaattttgcaccaactactgtttgttcattttagaattgggtgtcaccatagcagaatagccatt
attccagggagaagagccaggaggaatggacccggtagatcttaacctagagccctggaatcatccgggaagtcggccta
caactgcttgtaacaattgttactgtaaaatatgttgctggcattgccaaatatgctttctgaaaaaaggcttaggcatc
tcctatggcaggaagaagcggaagcaccgacgaggaactcctcagagcagtaaggatcatcaaaatcctgcaccaaagca
gtaagtaataagtatatgtaatgtcacctttagaaattagtgcaatagtaggactgatagtagcaataatcttagcaata
gtagtgtggactatagtagctatagaaattaggaatatattgaagcaaagaaaaatagacaggttagttaagagaataag
agaaagagaagaagacagtggaaatgagagtgaaggagacacagatgaattggccaaacttgtggaaatgggggaccttg
atccttgggttggtgataatttgtagtgctgcagaaaacttgtgggtcacagtctattatggggtacctgtatggaaaga
cgcatccaccactctattttgtgcatcagatgctaaagcatatgatacagaggcacataatggttgggctacacatgcct
gtgtacccacggaccccagcccacaagaagaaatattgggaaatgtgacagaaaactttaacatgtgggaaaatgatatg
gtagaacagatgcaggaagatataatcagtctatgggatcaaagcctaaagccatgtgtaaaattaaccccactctgtgt
tagtttaaattgcactgatttgaggaatgatactaatatcaataggacaatagaaggaggagaaataaaaaactgttctt
tcaatataaccacaagcataagaactaaggtaaaagactatgcacttttttacagccttgatgtagaagcaatagataat
accagctataggttgagaaagtgtaacacctcaatcattacacaagcttgtccaaaggtatcctttgagccaattcccat
acattattgtaccccggctggttttgcgattctaaagtgtaacaacaaaaagtttaatggaacaggaccatgtacaaatg
tcagtacagtacaatgtacacatggaattaggccagtagtatcaactcaactgctgttaaatggcagtttagcagaagaa
gaggtaataatcagatctagcaacttcacgaacaatgctaaaatcataatagtacagctaaatgaatctgtagaaattaa
ttgtacaagacccaacaacaatacaagaaaaagtatacatataggtccagggagatcatggtatacaacaggagaaataa
taggagatataagacaagcacattgtaaccttagtagcacaaaatggggtaacactttaaaccagataactgaaaaatta
agagaacaatttgggaataaaacaatagtctttaaccaaccctcaggaggggacccagagattatagtgcacagtttcaa
ttgtggaggggaatttttctactgtaatacatcacaactgtttaatagtacttggtttcagaatggtaatagtacttgga
atgatactgcaggaaatggcactatcacgctcccttgcagaataagacaaattgtaaacatgtggcaggaagtaggaaga
gcaatgtatgcccctcccatcaaaggacaaattagatgttcatcaaatattacagggttgctattaacaagagatggtgg
taaaaatgagaataccacgaataccaccgagatcttcagacctgcaggaggagatatgagggacaattggagaagtgaat
tatataaatataaaatagtaaaaattgaaccattaggagtagcacccaccaaggcaaagagaagagtggtgcagagagaa
aaaagagcagtgggaacgataggagctatgttccttgggttcttgggaacagcaggaagcactatgggcgcagcgtcaat
aacgctgacggtacaggccaggcaattgttgtctggtatagtgcaacagcagagaaatctgctgagggctattgaggcac
aacagcatctgttgcaactcacagtctggggcatcaagcagctccaggcaagagtcctggctgtggaaagatacctaaag
gatcaacagctcctggggatttggggttgctctggaaaactcatctgcaccactgctgtgccttggaatgctagttggag
taataaatctctgaatgagatttgggataacatgacttggatggaatgggaaagagaaattagcaattacacaaaagaaa
tatacaccttaattgaacaatcgcagaaccaacaggaaaagaatgaacaagaattattagcattggataagtgggcaagt
ttgtggaattggtttgacataacaaactggctgtggtatataaaaatattcataatgatagtaggaggcttgataggctt
aagaatagtttttgctgtgctttctatagtgaatagagttaggcagggatactcacctttgtctctccagacccctatcc
atcagcagagggaagccgacagacccgaagaaatcgaagaaggaggtggcgagcaaggcagaaacggatccgtgagatta
gtgagcggattcttagcccttgcctgggacgatctgcggagcctgtgcctcttcagctaccaccgcttgaaagacttagt
ctcgattgcaacgaggactgtggaacttctgggacgcagcagtctcaagggactgagactggggtgggaaggcctcaaat
atctggggaatcttctgttgtattggggccaggaactaaaaattagtgctatttctttgcttgatactacagcaatagca
gtagcggggtggacagatagggttatagaagtagcacaaagagcttggagagccattctccgcatacctagaagaatcag
acagggtttcgaaagggctttgctataacatgggaagcaagtggtcaaaaagttggcctcaggtcagggaaaaaataaag
caaactcctccagcagcagagggagtaggagcagtatcgcaagatctagacaaccatggagcagtaacaagtagtaatat
gaataatgctgatagtgtctggctgagagcagaggaggacgaggaggtaggctttccagtcaggccacaggtacctctaa
gaccaatgacttttaaggaagcttttgatcttagcttctttttaaaagaaaaggggggactggatgggctaatttactcc
aagaaaagacaagagatccttgatttatgggtttataatacacaaggcttcttccctgattggcaaaactacacaccagg
gccagggatcagatacccactgtgctttggatggtgcttcaagctagtaccagttgacccaagtgatgtagaggagaaca
acaaaggagaaaacaactgcctgttacaccccatgagccagcatggaatggaggacgaagaaagagaagtgctgaagtgg
cagtttgacagtgccctagcacgaaaacacatagcccgagaactgcatcctgagtactataaagactgctgacaaagaag
tttctaactgggacttccgctggggactttccaggggaggtgtggccggggcggagttggggaatggctaaccctcagat
gctgcataaaagcagccgctttgcgcctgtactgggtctctcttggtagaccaggtcgagcccgggagctctctggctag
caagggaacccactgcttaaaggctcaataaagctttgc

>16_A2D.KR.1997.97KR004
cgtaaagtgaaagtaatagggacttgaaagcgaaagttccagagaagatctctcgacgcaggactcggcttgctgaagcg
cacggcaagaggcgaggggcggcgactggtgagtacgctgaaaattttttgactagcggaggctaaaaggagagagatgg
gtgcgagagcgtcagtattaagcgggggaaaattagatgcatgggaaaaaattcggttacggccaggaggaaagaaaaaa
tatagactaaaacatctagtatgggcaagcagggagctagaacgctttgcaattaatcctggccttttagagacatcaga
aggctgtaaacaaataataggacagctagaaccatctattaagacaggatcagaagaaattaagtcattgtttaatgcag
tagtaaccctctattgtgtacatcaaagaatagaggtaagagacaccaaggaagctctagataaattagaggaagaacaa
aacaaacacaagcagaagacacagcctgcagcagctgacacaggaagcagcggcagtcaaaattaccccatagtgcaaaa
tgcacaagggcaaatgacatatcagaacttatcacctaggactttgaatgcatgggtcaaagtagtagaagaaaaggctt
ttagcccagaagtaatacccatgttttcagcattatcagaaggagccaccccacaagacttaaataccatgctaaacaca
gtggggggacatcaggctgctatgcaaatgttaaaagataccatcaatgaggaagcggcagaatgggacaggctgcatcc
agtacatgcagggcctattccaccaggccagatgagggaaccaaggggaagtgatatagcaggaactactagtacccttc
aggaacaaataggatggatgaccagcaacccacctgtcccagtgggagagatctataaaagatggataatcttgggatta
aataaaatagtaagaatgtatagccctgtcagcattctggacataagacaagggccaaaagaaccctttagagactatgt
agataggttctttaaaactctcagagctgagcaagctacacaggaagtaaaaaattggatgacagaaaccttgctggtcc
aaaatgcgaacccagattgtaaatccatcttgagagccttaggaccaggggcttcattagaagaaatgatgacagcatgt
cagggagtgggaggacccagccataaagcaagggttttggctgaagcaatgagccaagtacaaaatacaaattcaaacat
aatgatgatgcagaaaggcaattttagggggcaaaaaaaattaagtgtttcaactgtggcaaggaaggacacctagccag
aaattgcagggcccctaggaaaaagggctgctggaaatgtgggaaggaaggacatcaaatgaaagactgcactgagagac
aggctaattttttagggaaaatttggccttcccacagcgggaggccagggaattttcctcagagcagaacagaaccaaca
gccccaccagcagaggactttggaatgggggaggagacaacccccttgcagaagcaggagctgaaaaacagggaacaaca
cactcctgcaatttccctcaaatcactctttggcaacgaccccttgttacagtaaaaatagaaggacagctaagagaagc
tctattagatacaggagcagatgatacagtgttagaagatataaatctaccaggaaaatggaaaccaaaaatgatagggg
gaattggaggttttatcaaagtaaggcaatatgatcagataactatagaaatttgtgaaaaaagagccataggtacagta
ttagtaggacctacacctgtcaacataattggaagaaatatgttggttcaactgggttgtactttaaattttccaataag
tcctattgaaactgtaccagtaaaattaaagccaggaatggatggcccaaaagtcaaacaatggccattgacagaagaaa
aaataaaagcattaacagaaatttgtaaagaaatggaaaaggagggaaagatttcaaaaattgggcctgaaaatccatac
aacactccagtgtttgctataaagaaaaaagacagcactaaatggagaaaactagtagatttcagagaactcaataagag
aactcaagacttctgggaagttcagttaggaataccacatccagcaggattaaaaatgaaaaaatcagtaacagtactag
atgtgagggatgcatatttttcagttcccttacatgaagacttcagaaaatacactgcatttaccatacctagtacaaac
aatgagacaccaggagttaggtatcagtacaatgtgcttccacagggatggaaaggatcaccagcaatattccaaagtag
catgacaaaaatcttagagccctttagaaaacaaaatccagaaatagttatttatcgatacatggatgatttgtatgtag
gatctgatttagaaatagggcagcatagaacaaaaatagaggaattaagaaatcatctactgaaatggggattttacaca
ccagataaaaaacatcagaaagaacctccatttctttggatggaatatgaactccatcctgacaaatggacagtccagcc
tataaagctgccagaaaaggacagctggactgtcaatgatatacagaaattagtgggaaagttaaattgggcaagtcaga
tttatgcagagattaaagtaaagcaactgtgtaagctccttaggggagctaaagcactgacagacatagtaccactgact
aaagaagcagaattagaattagaagagaacagggagattctaaaagaccctgtacatggggtatactatgacccatcaaa
agacttaatagcagaagtacagaaacaaggaccagaccaatggacatatcaaatttatcaagaaccatttaaaaacctaa
aaacagggaaatatgcaaaaaggaggtccacccacactaatgatgtaaaacaattaacagaagcagtacaaaaaatagtc
atggaaagcatagtaatatggggaaaaattcctaaatttagattacccatacaaaaagaaacatgggaaacatggtggac
ggagtattggcaggctacctggattcctgagtgggagtttgtcaatacccctcctctagtaaagctatggtatcagttag
aaacagagcccataacaggagcagaaactttctatgtagatggggcagccaatagagagactaaactaggaaaggcaggg
tatgtcactgacaaaggaagacaaaaaattgtctccctaactgatacaacaaatcagaagactgaattacatgcaatcta
tttggctttacaggattcaggattagaagtaaacatagtaacagattcacagtatgcattaggaatcattcaggcacaac
cagataggagtgaatcagagatagtcaatctaataatagaaaagttaatagaaaaagaaagagtctatctatcatgggta
ccagcacacaaagggattggagaaaatgaacaggtagacaaattagtcagttctggcatcaggaaagtgttatttttaga
tgggatagataaggctcaagatgaacatgaaaaataccgcagtaattggagagcaatggctcatgactttaatctgccac
ctgtggtagcaaaagaaatagtagcttgctgtgataaatgtcaggtaaaaggggaagccatgcatggacaagtagactgt
agtccaggaatatggcaattagattgcacacatctagaaggaaaaattatcctagtagcagtccatgtagccagtggcta
tatagaagcagaagtcatcccagcagaaacaggacaggagacagcttactttatattaaaactagcaggaagatggccag
taaaagtaatacatacagacaatgggcccaatttcatcagtgcaccagttaaggcagcctgttggtgggcgggtgtccaa
caggaatttgggattccctacaatccccaaagtcaaggagtagtggaatctatgaataaagaattaaagaagatcatagg
gcagataagagatcaagctgaacaccttaagacagcagtacaaatggcagtattcatccacaattctaagagaaaagggg
ggattgggggatacagtgcaggggaaagaataatagacataatagcaacagatatacaaactaaagaactacaaagacaa
attacaaaaattcaaaattttcgggtttattacagggacagcagagatccaatttggaaaggaccagcaaaactcctctg
gaaaggtgaaggggcagtagtaatacaagacaatagtgatataaaggtagtaccaagaagaagagcaaagatcattaggg
attatggaaaacagatggcaggtgatgattgtgtggcaggtagacaggatgaggattagaacatggaatagtttagtaaa
gcatcatatgtatgtttcaaagaaagctaaagattggtgctatagacatcactatgaaagcataaatccaagagtaagtt
cagaggtacacatcccgctagggggggctaaaataatagtaaaaacatattggggtctgcacccaggagaaaaagactgg
cacttgggtcagggggtctccatagaatggaggcaggaaagatacagtacacaaatagaccctgatctagcgggccatct
aatccatctgcattattttgactgtttttcagactctgccataaggaaggccatattaggaaaaatagttagacctaggt
gtgaatatcaagcaggacataacaaggtaggatctttgcaatacttggcattgaaagcattagtaggtgaaacaagaaca
aagccacccctgcctagtgttaggaagctaacagaagatagatggaacaagccccagaagaccaagggccacagagggag
ccatacaatgaatggacattagagctcttagaagatcttaagagagaagctgttagacattttcctaggccatgactcca
tagcttaggacaatatatttatgcaacttatggggatacctggacaggagttgaagctataataagaattctgcaacaaa
tgctgtttattcatttcagaattggatgtcaacatagcagaataggtattatgccaagaggagcaagaaatggatccagt
agatcctaacctagagccctggaaccatccaggcagtcagcctaggactgcttgtaacaagtgttattgtaaaaggtgtt
gctatcattgtccagtgtgcttcctaaacaaaggcttaggcatctcctatggcaggaagaagcggagaccccgacgaaga
cctcctcagggcggtacgggccatcagaatcctataccagagcagtaagtagtagttcttaatagatgtaatgaattctt
tacaaatattgtcaatagtaggtctgatagtagcattcatcttagcagtagttgtatggactatagtattcatagaatat
aagaaaattaagaagcaaaacaaaatagactggttaattaagagaataagtgaaagagcagaagatagtggcaatgagag
tgagggggatacagaggaattatcaacacttatggaaatggggaatcttgattttggggatgctaatgattagtaaagct
acagaagatctgtgggtcacagtatactatggagtacctgtgtggagagatgcagagactaccctattttgtgcatcaga
tgctaaagcatatgatacagaagcacataatgtttgggccacacatgcctgtgtacccacagaccccaacccacaagaaa
taaacctggaaaatgtaacagaaaattttaacatgtggaaaaatggcatggtagaacagatgcatgaagatataatcagt
ctatgggatcaaagcctaaagccatgtgtaaaattaacccctctctgtgtcactttaaattgtagcagggtcaaaaatac
catcagtagcacccagagccccgatagcaataacaccatgaactgctcttttgagactaccacagaactaagagataaga
aacagaaagtccaagcactattttatgaacttgatatagtacaacttaatagtagtgacagtaatgatacactgaatagg
cagtatagactaatacattgtgatacctcaaccatcacacaggcttgcccaaaggtatcctttgagccaattcctataca
ttattgtgccccagctggttttgcaattctaaagtgtaaggacccggaattcaatggaacagggccatgcaagaatgtta
gctcagtacaatgtacacatggaattaggccagtggcatctactcaattgctgctgaatggcagtctagcagaaggaaat
aaaacaataattagatctgcaaatattacagacaatactaaaaacataatagtacagtttactaagcctgtacaaattaa
ttgtaccagacccgacgtcggtcaaagaaggagtgtacgcattggaccaggacgagccttctatacaaggcaaacatata
caaggcaagcaaaaggggatataagacaagcacaatgtaatatcagcagcagacaatggaatgacactttacaaaaggta
gctgagcagttaagaaaatacttctctaataaaacaataatctttaccaactcctcgggaggggacatagaaattacaac
acatagtgtcaattgtggaggagaatttttctattgcgatacatcaggcctgtttaatagcacgtggcctgccaatgcat
caagggagaatgaggagaaagatcgcaatgtgactctcccatgcagaataaaacaaattgtaaacatgtggcagagagta
ggacgagcaatgtatgcccctcccattaacggaacaataaagtgtacatccaacattacaggaatgatattaacaagaga
tgggaacagtgggggcaatgcaaccaatgagaccttcagacctggaggaggagatatgagggacaattggagaagtgaat
tatataagtataaagtagtaaaactagaaccactaggagtagcacctaccagggcaagaagaagagtggtggagagggaa
aaaagagcagcagttggactgttcttccttgggttcttgggagcagcaggaagcactatgggcgcggcgtcagtgacgct
gacggtacaggccagacaattattgtctggcatagtgcaacagcaaagcaatttgctgaaggctatagaggctcaacagc
atatgttgagactcacggtctggggcattaaacagctccaggcaagagtcctggctgtggaaagatacctacaggatcaa
cagctcctgggaatttggggctgctctggaaaactcatctgcaccacctttgtgccctggaactctagttggagtaatag
gacccaggatgacatttggaacaacatgacctggttgcaatgggagagagaaattgacaattacacaggcacaatttaca
ggctacttgaagaatcacagaaccagcaggaaaagaatgaaaaagacttattggcattagataaatgggcaagcttgtgg
aattggtttgacatatcaaactggctgtggtatataaaaatattcataatgatagtaggaggcttgataggattaagaat
agttatggctataatttctgtagtgaatagagttaggcaggggtactcacctgtatcatttcagatccctcccccgaccc
cagaggatcccgacaggcacggaagaatcgaagacggaggtggagagcaaggcagagacagatccgtgcgattagtgagc
ggattcttagcgcttgtctgggaagacctacggagcctgtgcctcttcagctaccaccgcttgagagattgcatctcgat
tgcagcgaggactgtggaacttctgggacacagcagcctcaagggactgagactggggtgggaaggcctcaaatatctgt
ggaaccttctgttgtattggggtcgggaactgaagaatagtgctattagtttatttaatgccacagcaatagcagtagct
gagtggacagatagagttatagaaatagtacaaagagcttgcagagctattatcaacatacctagaagaatcagacaggg
cttagagagagctttactataaaatggggggcaagtggtcaaaaagaagcttaccaggatggcctgctattagggaaagg
atgagacgaactcctccagcagcagaacgaacccctccagcagcagcagcagaaggagtaggagcagtatctcaagattt
agctacacgtggggcagtcacaattaataatacagcagctaccaatgctgatagtgcctggctggaagcgcaagaggaag
aggaggaagtaggcttcccagtcaggccacaggtacctttaagaccaatgacctacaagggagcgtttgatctcagccac
tttttaagagaaaaggggggactggatgggctaattcactcacagaaaaggcaagacatccttgatctgtgggtctacca
cacacaaggcttcttccctgattggcagggttacacaccagggccaggaattagatacccactaacatttggatggtgct
tcaagctagtaccagtcagtccagctgaggtagaggaggctactgagggagagaccaacagcttgttacaccctatatgc
caacatggaatagaggaccctgagagagaagtgttaaagtgggtgtttgatagtcaccttgcactggtacacaaagcccg
agagctgcatccggagttctacaaagactgctgacacagaagctgctgacacagaagttgctgacagggactttccaccg
gggacttttaggggaggtgtcaagggcggagttggggagtggctaccctcagatgctgcatataagcagctgcttctcgc
ttgtactgggtctctcttgttggaccagatagagcctgggagctctctggctagcaggggaacccactgcttaaagcctc
aataaagcttgccttgagtgctgc

>17_BF.AR.1999.ARMA038
gcgagagcgtcggtattaagcgggggagaattagatagatgggaaaaaattcggttacggccagggggaaggaaaaaata
tagattaaaacatatagtatgggcaagcagggagctagaacgatttgcagtcaatcctggcctattagaaacagcagacg
gctgtcgaaagataataggacagctacaaccatcccttcagacaggatcagaagagcttagatcattatataatacaata
gcagtcctctattatgtacatcaaaaggtagatgtaaaggacaccaaggaagctttagagaagctagaggaagaacagaa
caaaagtaggcaaaagacacagcaagcagcagctgacaagacacagcaagcggcagctgacaaaggggtcagtcaaaatt
accctatagtacagaatcttcagggacaaatggtacaccagactatatcacctagaactctaaatgcatgggtaaaggta
gtagaagagaaggcttttagcccagaagtaatacccatgttttcagcattatcagaaggggctaccccacaagatttaaa
caccatgttaaatacagtggggggacatcaagcagccatgcaaatgttaaaagataccatcaatgaggaagctgcagaat
gggacagattacatccagtgcaggcagggcctatcccaccaggccagataagggaacctagaggaagtgatatagctgga
gctactagtaaccttcaggaacaaatacaatggatgacaagcaacccacctgtcccagtgggagaaatctataaaagatg
gatcatcctaggattaaataaaatagtaagaatgtatagccctgtcagcattttggacataaaacaagggccaaaagagc
cctttagagactatgtagacaggttctttaaaaccctaagagctgagcaagcttcacaggaagtaaagggttggatgaca
gacaccttgttggtccaaaatgcgaatccagattgtaaaaccattttaaaagcattgggaccaggggcacaactggaaga
aatgatgacagcatgtcagggagtgggaggacctggccataaggcaagagttttggctgaggcaatgagccaagtaacaa
atccaactgtactgatgcaaaaaagtaactttaagggcccaagaaaaaatgttaaatgtttcaattgtggcaaagaagga
cacatagccagaaattgcagggcccctagaaaaaagggctgttggaaatgtggaagagaaggacaccaaatgaaagactg
cactgaaagacaggctaattttttagggaaaatttggccttccaacaaggggaggcccggaaatttccttcagaacaggc
cagagccaacagccccgccattagagagcttcgggttcggggagacgataaccccccagccgaagcaggagccgaaagac
gagggactgtaccctcccttagcttccctcaaatcactctttggcaacgacccctagtcgaaataaaagtagggggacag
ctaaaggaagctctattagatacaggagcagatgatacagtattagaagacataaatttaccaggaaaatggaggccaaa
aatgatagggggaattggaggttttatcaaagtaaaacagtatgatgatatactcatagaaatttgtggacacaaggcta
taggtacagtattagtaggacctacacctgttaacataattggaagaaatctgttgactcaacttggttgcactctaaat
tttcccattagtcctattgaaactgtaccagtaaaattaaagccaggaatggatggcccaaaagttaagcaatggccatt
gacagaagaaaaaataaaagcattagtagaaatatgtacagaaatggaaaaagaaggaaaaatttcaaaaattgggcctg
aaaatccatacaatactccagtatttgccataaagaaaaaagacagtactaaatggagaaaactagtagatttcagagaa
cttaataaaagaactcaagatttctgggaagttcaattaggaataccacatcccgctgggttaaaaaagaaaaaatcagt
aaccgtactggatgtgggtgatgcatatttttcagttcccttagataaagaattcaggaagtatactgcatttaccatac
ctagtataaacaatgagacaccaggaattagatatcagtacaatgtgctaccacagggatggaaaggatcaccagcaata
ttccagagcagcatgacaaaaatcttagaaccttttagaaaacaaaatccggacctagttatctatcaatacatggatga
tttgtatgtaggatctgacttagaaatagggcagcacagaacaaaaatagaggaactaagacaacatctgttaaagtggg
gattaaccacaccagacaaaaaacatcagaaagaacctccattcctttggatgggttatgaactccatcctgataaatgg
acagtgcagcctataatactgccagaaaaggacagctggactgtcaatgacatacagaagttagtgggaaaattaaattg
ggcaagtcagatttacccagggattaaagtgaagcaattatgtaaactccttaggggaaccaaggcactaacagaaatag
taccactaacaaaagaagcagagctagaactggcagaaaacagggaaattctaaaagaaccagtacatggagtgtattat
gacccatcaaaagacttaatagcagaaatacagaagcaggggcaaggtcaatggacatatcaaatttatcaagagccatt
taaaaatctaaaaacaggaaaatatgcaagaatgaggggtgcccacactaatgatgtaaaacaattaacagaggcagtgc
aaaaaatagccacagaaagcatagtaatatggggaaagactcctaagtttagactacccatattaaaggagacatgggat
acatggtggacagagtattggcaagccacctggattcctgagtgggagtttgttaataccccccctctagtaaaactatg
gtatcagttagaaacagagcccatagcagaagcagaaaccttctatgtagatggggcctctaatagagagaccaaaaaag
gaaaggcaggatatgttactgatagaggaagacaaaaggctgtctccctaactgagaccacaaatcagaaggctgaatta
catgcaatcaagttagccttacaggattcaggatcagaagtaaacatagtaacagactcacagtatgcattaggaatcat
tcaagcacaaccagataagagtgagtcagagatagtcaatcaaataatagagcaattaataaaaaaggaaaaggtctacc
tgtcatgggtaccagcacacaaagggattggaggaaatgaacaagtagataaattagttagtgctggaatcagaaaaata
ctgtttttagatgggatagataaggcacaggaggaacatgaaaagtatcacaacaattggagagcaatggctagtgattt
taatctgccacctgtagtagcaaaagaaatagtagctagctgtgataagtgtcagctgaaaggggaagccatgcatggac
aaatagattgtagtccagggatatggcaattagattgcacacatttagaaggaaaaattatcctggtagcagtccatgta
gctagtgggtacctagaagcagaggttatcccagcagaaacaggacaagaaacagcctacttcatactaaagttagcagg
aagatggccagtaaaaacaatacatacagacaatggccccaatttcagcagtaacgcggttaaggcagcctgttggtggg
caggtatccagcaggaatttggaattccctacaacccccaaagtcaaggagtagtagaatctatgaataaagagttaaag
aagatcataaggcagataagagatcaagctgaacatcttaagacagcagtacaaatggcagtattcattcacaattttaa
aagaaaaggggggattgggggatacagtgcaggggaaagaataatagacataatatcaacagacatacaaactagagaat
tacaaaaacaaattataaaaattcaaaatttccgggtctattacagggacagcagagacccagtttggaaaggaccagca
aagctactctggaaaggtgaaggggcagtagtcatacaagacaatagtgaaataaaggtagtaccaagaagaaaagcaaa
gatcattagggattatggaaaacagatggcaggtgatgattgtgtggcaggtagacaggatgaggattaacacatggaaa
agtttagtaaaataccatatacatgtttcaaagcaaaccaaaagatgggtttatagacatcactttgaaagcaggaatcc
aagagtaagttcagaagtacacatcccactagaggacgctaaattagtaatagcaacatactgggggctgcacccaggag
aaagagattggcatctgggacagggagtctccatagaatggaggcaagggaggtataggacacaaatagaccctggcctg
gcggaccaactgatccatatatattattttgattgtttttcagaatctgccataaggaaagccatattaggaaataaaat
tagccctaggtgtaactatcaagcaggacataacaaggtaggatctctacaatacttggcactaacagcattaatagctc
caaaaaagacaaagccgcctttgcctagtgtcaagaaactagtagaagacagatggaacaagccccaggagaccaggggc
cacagagggagccatacaatgaatggacactagagcttttagaggagcttaagaatgaagctgttagacattttcctagg
ccatggctccatagcttaggacaacatatctataacacctatggggatacttgggagggagttgaagctataataagaat
attgcaacaactactgtttatccatttcagaattgggtgccatcatagcagaataggcattattcgacagagaagagtca
gaaatggagatagtagatcctaacttagatccctggaaccatccaggaagccagcctacaactccttgtaccagatgttt
ttgtaaagagtgttgctttcattgttactggtgctttacaacaaaaggcttaggcatcaactatggcaggaagaagcgga
gacagcgacgaagacctcctcaaggcaatccgcctcatcaagtttctctaccaaagcagtaagtagtacatgtaatgcaa
gctttagaaatattagccatagtagcattagtagtagcaacaataatagcaatagttgtgtggtctatagtgctcataga
atataggaaattattaagacaaagaaaaatagacaggttaattgaaagaataagagaaagagcagaagatagtggcaatg
agagtgagggggatgcagaggaaatctcagcacttatggaaatggggcaccatgctccttgggatattaatgatctgtaa
tacagcaggaactttgtgggtcacagtctattatggggtacctgtgtggaaagaagcaaccactattctattctgtgcat
cagatgctaaaggatatgagacagaggtacataatgtttgggccacacatgcctgtgtacccacagatcccaatccacaa
gaaatgccgctggaaaatgtaacagaaaattttgatatgtggaacaataacatggtagaacaaatgcatacagatgtaat
cagtttatgggatcaaagcctaaagccatgtgtgaaattaaccccactctgtgttactttaaattgtaatgatgtcaatg
tcactgccaccaatagtactcaaaacagcaccctgaaggaagaggcaggggcaatacaaaactgttctttcaatatgacc
acagaagtaagggataagcagctaaaagtacatgcacttttttatagacttgatatagtaccaatcaatggtagtaatgg
cagtggaggagaatataggctaataaattgtaatacctcaaccattacacaggcttgtccaaaggtatcttgggatccaa
ttcccatacattattgtgctccagctggttatgcgattctgaaatgtaataataaaacgttcaatgggacgggaccatgc
aacaatgtcagtgtagtgcaatgtacacatggaattaaaccagtggtatcaactcaattgttgttaaatggcagcctagc
agaaggagatataataatcagatctaaaaatatctcagataatacaaaaaccataatagtacaccttaatgaatccgtac
agattaattgtacaagacccaacaataatacaagaaaaagtatacagttaggaccaggacgtgcattttatgcaacagga
gaaataataggagacatcagaaaggcacattgtaatgttagtaaaacacaatggaataaaacattagaacaggtaagggc
aaagttagagtctcatttccctaataaaacaataaaatttaactcatcctcaggaggggacctagaaattacaatgcata
gttttaattgtagaggagaatttttctactgcaatacatcaaaactgtttaatgactcccgggataatgacacagaatcc
aatgacactatcattctcccatgtcgaataaaacaaattgtaaacaggtggcaggaagtaggacaagcaatgtatgccgc
tcccattgcaggaaacattgtttgtaactcaaatattacaggtctactattgacaagagatggtggtcagggaaatggta
gtggaccagaaatcttcagacctgagggaggaaatatgaaagacaattggagaagtgaattatataaatacaaagtagta
gaaattgaaccattaggagtagcacccaccaaggcaaagagaagagtggtgcagagagaaaaaagagcagtgggaatggc
agctgtgttcattgggttcttgggagcagcaggaagcactatgggcgcagcgtcaataacgctgacggtacaggccagac
aattattgtctggaatagtgcaacagcagagcaatctgctgagggctattgaagcgcaacagcatatgttgcagctcaca
gtctggggcattaaacagctccaggcaagagtcctggctgtggaaagatacctaaaggaccagcagctcatgggaatttg
gggttgctctggaaaactcatttgcaccactgctgtgccttggaatactagttggagtaataaatctcaggaggagattt
ggaataacatgacctggatggagtgggaaaaagagattagcaattactcagaagaaatatacaggctaattggagagtcg
cagaaccagcaggaaaagaatgaacaagaattattggcattggaaacatgggcaagtctgtggaattggtttgacatatc
aaactggctgtggtatataaaaatattcataatgatagtaggaggcttggtaggcttaagagtagtttttactgtgcttt
ctatagtaaatagagttaggaagggatactcacctgtgtcattacagacccgccccccaagcccgagggaacccgacagg
cccgaaggaatcgaagaaggaggtggagagcaaggcaaagacagatcaataagattggtgaacggattcttgccacttat
ctgggacgacctgcggagcctgtgcctcttctgctaccaccgcttgagagacttactctggattgtagcaaggattgtgg
aacttctgggacgcagggggagggaagccctcaggtattggtggaaccttctacaatattggagtcaggaactaaagaat
agtgctattagcttgcttaataccacagcaatagtagtagctgaggggacagatagagttatagaagctttgcaaagagc
tggtagagctgttctcaacatacctagaagaataagacagggcttcgaaagggctttgctataaaatgggtggcaagtgg
tcaaaaggatggcctgctgtaagggaaagaatgagacgagctgagccagagccagcagcagaaggggtgggagcagtgtc
tcgagacttagagagacggggggcagttacaagcagcaataccagcgctaataatcctgacttggcctggctggaagcac
aagaggaagaagaagtaggctttccagtcagacctcaggtacctttaaggccaatgacttacaaaggagctctagatctt
agccactttttaaaagaaaaggggggactggaagggctaatttactccaaaagaagacaagaaatccttgatctgtgggt
ctacaacacacaaggctacttccctgattggcagaactacacaccagggccagggatcagatatccactgaccttggggt
ggtgctacaagctagtaccagttgaaccagaggagatagagaaagccaacgaaggagaaaacaactgcctgctacacccc
atgagccaacatgaaatggatgatgaagacagagaagtgctgaagtggaagtttgacagcagcctggcatttagacacgt
agccagagagagacatccagagttctaccaaaactgagactgctgacacagagattgctgacacagaagaatctaaggga
ctttccactggggactttccggggggcgggccagagggcgggaatggggagtggctcaccctcagatgctgcatataagc
agccgcttttcgcctgtactgggtctctctagttagaccagatttgagcctgggagctctctggctagctagggaaccca
ctgcttaa

>18_cpx.CU.1999.CU76
ctctcgacgcaggactcggcttgctgaggtgcacacagcaagaggcgagagcggcgactggtgagtacgccaaaattttt
gactagcggaggctagaaggagagagatgggtgcgagagcgtcagtattaagcgggggaaaattagataaatgggaaaaa
attcggttaaggccaggaggaaagaaaaaatatagactaaaacatttggtatgggcaagcagggagctggagagatttgc
actcaaccctggcctgttagaaacagcagaaggatgtcagcaaataatagaacagttacaatcatctatcaaaacaggat
cagaagaaattaagtcattatataatacagtagcaactctctattgtgtacatcaggggatagatgtaaaagacaccaag
gaagccttagataaaatagaggaaatacaaaataagagcaagcaaaagacacagcaggcagcagctgccgcaggaagcag
cagccaggtcagccaaaattaccccatagtgcaaaatgcacaagggcaaatggtacatcagtccatatcacctaggactt
tgaatgcatgggtaaaagcaatagaagaaaaggcttttagcccagaagtaatacccatgttctcagcattatcagaggga
gctaccccacaagatttaaatatgatgctgaacatagtggggggacatcaggcagctatgcaaatgttaaaagataccat
caatgaggaagctgcagaatgggacagaatacatccagtacaggcagggcctattgcaccaggccagataagagatccaa
ggggaagtgatatagcaggaactactagtacccttcaagaacaaataaggtggatgacaaacaacccacctatcccagtg
ggagatatctataagagatggataatactgggattaaataaaatagtaagaatgtatagccctgttagcattttggacat
aagacaagggccaaaagaaccttttagagactatgtggataggttctttaaaactctcagagctgagcaggctacacagg
aggtaaaaaattggatgacagaaaccttactggtccaaaatgcgaatccagattgtaagaacattttaagagcattagga
ccaggggctacactagaagagatgatgacagcatgtcagggagtgggaggacccagccataaagctagggttttggctga
agcaatgagtcatgtacaaaataccaacataatgatgcagagaggaaatttcaagggccagaaaagaattaagtgtttca
attgtggcaaagaaggacacatagccagaaattgcagggcccctaggaaaaagggctgttggaaatgtgggaaagaagga
caccaaatgaaagactgcactgaaagacaggctaattttttagggaaaatttggccttccaacaaggggaggccagggaa
ttttctccagaaaaggccagagccaacagccccaccagcggagagcttggggttcggagaggagatagccccctccccga
agcaagagtcgaaggaggagaaatatcctttctcttccctcaaatcactctttggcagcgacccctcgtcacagtaaaga
tagggggacagctaatagaagccctattagacacaggagcagatgatacagtattagaagacataaatttaccaggaaaa
tggaaaccaaaaatgatagggggaattggaggttttatcaaagtaagacaatatgatcaaatacttatagaaatttgtgg
aaaaagggctataggtacagtattagtaggacctacacctgtcaacataattggaagaaatatgttgactcagattggtt
gtactttaaattttccaattagtcctattgaaactgtaccagtaaaattaaagccaggaatggatggcccaaaggttaaa
caatggccattgacagaagaaaagataaaagcattaacagaaatatgtacagagatggaaaaggaaggaaaaatttcaaa
gattgggcctgaaaatccatacaacaccccaatatttgccataaagaaaaaagacagtactaaatggagaaaattagtag
atttcagagaacttaataaaagaactcaagatttttgggaagttcagttagggataccacatcctgctgggttaaaaaag
aaaaaatcagtaacagtattggatgtgggggatgcatatttttcagttcccttagatccagagttcaggaagtacactgc
attcaccatacctagtatcaacaatgagacaccaggaatcagatatcagtacaatgtgcttccacagggatggaaaggat
caccagcaatattccaaagtagcatgacaaaaatcttagagccctttagaaaagaaaatccagaaatagttatataccaa
tacatggatgatttatatgtagggtctgacttagaaatagggcaacatagaacaaaaatagaggaactaagacaacatct
attgaaatggggatttaccacaccagacaaaaaacatcagaaagaacctccatttctttggatgggatatgaactccatc
ctgacaaatggacagtccagccgatacagctgccagaaaaagacagctggactgtcaatgatatacagaagttagtagga
aaactgaattgggcaagtcaaatttatccagggattaaagtaaagcagctatgtaaactcattagggggaccaaagcact
aacagacatagtaccactgactgtagaagcagaattggaattagcagaaaacagggaaattctaaaagagcctgtgcatg
gggtatattatgacccatcaaaagacttggtagcagaaatacagaaacaaggatatgaccaatggacatatcaaatttat
caagagccatttaagaacctaaaaacaggaaaatatgcaaaaaggagatctgctcacactaatgatgtaaagcagttagt
agaagtggtgcaaaaagtggccacagaaagcatagtaatatggggaaagactcctaaatttaaattacccatacagaaag
aaacatgggagacatggtggacagaatattggcaagccacctggattcctgagtgggagtttgttagtaccccgtttcta
gtgaaactatggtatcagttagaaacagagcccatagcaggagcagaaactttctatgtagatggggcagctaataggga
aactaaaatagggaaagcagggtatgtcactgacaaaggaagacaaaaggttatctccataactgaaacaacaaatcaga
aaactgaattagaagcaattcacttagcattgcaggattcggggcaggaagtaaacatagtgacagattcacagtatgca
ttaggaatcattcaagcacaacctgataaaagtgaatcagaaatagtcaatcaaataatagaggagttaataaagaagga
aaaggtctacctgtcatgggtaccagcacacaaagggattggaggaaatgaacaagtagataaattagtcagcagtggaa
tcagaagggtattatttttagatggaatagaaaaggctcaagaagaacatgataaatatcacaacaattggagagcaatg
gctagtgattttaatttgccaccagtagtagcaaaagagatagtagctagctgtgataaatgtcagctaaaaggggaagc
catgcatggacaagtagactgtagcccagggatatggcaattagaccgtacacatttagaagggaaaattatcatagtag
cagtccatgtagccagtggctatatagaagcagaagttatcccagcagaaacaggacaggaaacagcctaccttctacta
aaattagcaggaagatggccagtaaaagtaatacacacagacaatggccccaatttcaccagtgctgcagtaaaggcagc
ttgttggtgggcaaatattacacaagaatttggaattccctacaatccccaaagccaaggagtagtagaatctatgaata
aagaattaaagaaaatcataggacagataagagaccaagctgaacatctgaagacagcagtccaaatggcagtattcatt
cacaattttaaaagaaaaggggggattggggggtacagtgcaggggaaagaatagtagacataatagcatcagaaataca
aactaaagaattccaaaaacaaattacaaaaattcaaaattttcgggtttattacagggacagcagagacccaatttgga
aaggaccagcaaaactactctggaaaggtgaaggggcagtagtaatacaggacaacagtgaaattaaggtagtaccaaga
agaaaagcaaagatcattagggattatggaaaacagatggcaggtgatgattgtgtggcaggtagacaggatgaggatta
gaacatggaacagtatagtaaaacatcatatgtatgtctcaaagaaagctaaaaattggttttatagacatcactatgaa
agtagacatccaaaagtaagctcagaagtacacatcccactgggggatgctacattagtagtaacaacatattggggtct
gcatacaggagaaaaagaatggcatttgggtcatggggtctccatagaatggaggctgagaaggtacagaacacaagtag
atcctgacctggcagaccaactaattcatctgtattattttgactgtttttcagaatctgccataaggaatgccatatta
ggacatagagttagtcctaggtgtgaatatcaagcaggacataataaggtaggatctttacaatatcttgcactagcagc
attaataactccaaaaaagacaaagccacctttacctagtgttaggaaattagcagaagatagatggaacaagccccaga
agaccaggggccacagagggaaccaaacaatgaatggacactagagcttttggaggagcttaaaaatgaagctgttagac
actttcctcgaccctggctccatggcctaggacagtatatctataacacttatggggatacttgggaaggagttgaagct
ataataagaatactgcaacaactgctgtttattcatttcaggattgggtgccaacatagcagaataggtattgtgcgaca
aagaagagggagaaatggagccagtagatcctaacatagagccctggaaccagccaggaagtcagcctaaaactgcttgt
aacaattgttattgtaaaagatgttgctatcattgtcaactatgctttttaaagaaaggcttaggcatttcctatggcag
gaagaagcggagacagcgacgaacaactccttacgacagtaagcatcatcaagatcttataccagagcagtaagtagctt
gtgatgkggkcttttgaaatagtaggtataatagcattaatagtagcttttattatagcagtatgtgtgtggaccatagt
atatatagaatatagaaagattttaaaacaaaagaaaatagatgggttatttgagagaataagagacagagcagaagaca
gtggctatgagagtgagggggacacagaggaattatccaagcttatggaaatggggaaccataatcctgggtatgttgct
gatgtgtagtgctacagatcacttgtgggtcacagtatattatggggtgcctgtgtggaaagatgcagtaaccactctat
tttgtgcatctgatgctaaatcatatagtactgaaagccataatgtctgggctacacatgcctgtgtacccacagacccc
gacccacaagaaataactctgggaaatgtaacagaaaattttaatatgtggaaaaataacatggtagaacagatgcatga
agacataatcagtttatgggatgaaagcctaaaaccatgtgtaaagctaacccctctctgtgttactttaaactgtacta
atgtaamttrtagtggaaacaacacttrtgctagcaatagtagcataagctacagaagaaatgaaaaactgctctttctt
tataaccacagaagtaagagawaagcagaagcaagaatatgcgcttttctatwwwctagatatagtatcaatagtgggga
trgtaatagtaattatagtgattataggttaataaattgtaatgtctcaaccattaaacaggcctgcccaaaagtgtctt
ttgacccaattcccatacattattgtgctccagctggttttgcgattctaaagtgcaacaatcaaccgtttaatggaaca
gggccatgcagaaatgttagcacagtacaatgtacacatggaattaagccagtggtatcaactcaattgctgttaaatgg
aagtctagcaacagaaaaggtaatgatcagatctgaaaatatcacagacaataccaagaacataatagtacagcttacga
cgcctgtaaacattacctgtaccagacccagcaataacacgagaagaagtatacatataggaccaggacaagcattctat
gcaacaggtgacataataggagatataagacaagcacattgtaatattagcgaaaaagattggaatgacactttacacga
ggtagctacacaattaggaggacacctgaacaagagcacaatatactttaaaccatcttcaggaggagacatagaaatta
caacacatacttttaattgtggaggagaatttttctattgtaatacaacagccttgtttaatagtacctggaataaaaca
rrtggtacctggataaaactagataacactacaaatrcgcaaaatggtactattacactgcaatgcagaataaaacaaat
tgtaagaatgtggcagagaacaggacaagcaatgtatgcccctcccagcagaggaaatattacatgttcatcaaatatta
cagggctaatattgacaagtgaccttattyatcatkntacagagaatgttaccttcagacctgggggaggagatatgaga
gacaattggagaagtgaattatacaaatataaagtagtgaaaattgaaccactaggagtagcacccactaaggcaaggag
aagagtagtggggagagaaaaaagagccgttggactgggagctgtcttccttgggttcttaggagcagcaggaagcacta
tgggcgcagcatcaataacgctgacggtacaggccagacaattattgtctggcatagtgcaacagcaaagcaatttgcta
agggctatagaggctcaacagcatatgttgaaactcacggtctggggcattaaacagctccaggcaagagtcctagctgt
ggaaagatacctaaaggatcaacagctcctaggaatttggggctgctctggaaaactcatctgccccactgcggtgcctt
ggaactctagttggagtaataaaacttacaatgacatttggaataacatgacctggttgcaatgggataaagaaattagc
aattacacacaattaatatatacactaattgaagaatcgcagaaccagcaggaaaagaatgaacaagacttattggcatt
ggacaaatgggcaagtctatggacttggtttgacataacraattggctgtggtatataagaatattcataatgatagtag
gaggcttaataggtttaagaatagtttttgctgtgctttctatagtaaagagagttaggcagggatactcacctttgtct
ttccagacccttatcccgaaccagctgggacccgacaggcccgaaggaacagaaggagaaggtggcgagcaaggcagagg
cagatcagtgcgattagtgagcggattcttaacacttgcctgggaggacctgcggagcctgtgcctcttcagctaccacc
gcttgagagacttactctggattgcagcgaggactgtggaacttttgggacgcagcagtctcaagggactgagactgggg
tgggaggctctcaagtacctgtggaatcttctggtgtattggggacaggagataaagagtagtgctattaatttgcttga
tacagtagcaatagcaacagctaactggacagatagggttatagaaatagtacaaagaactggtagagctattcttaaca
tacctagaagaatcagacagggcgccgaaagagctttgcaataatatggggggcaaatggtcaaaaagtagcctagtagg
atggcctgagattagggaaagaataagaagaactcaagaactacctagaactcctccagcagagtcccaagaggagcgaa
agcatgggtcaggaacaaacagcagtacagcagctactaatcctactcacggccgactggaagaggaggaggaagaggag
gtaggcttcccagtcaggccccaggtacctctaagacctatgacctataagggagcttttgacctcagcttctttttaaa
agaaaaggggggactggatgggttaattttcttccagaaaaggccagagatccttgatttgtgggttttcaacacacaag
gctttctccctgattggcagaattacacaccagggccaggagtcagattccccctaacctttggatggtgcttcaaacta
gtaccagttgattcaaatgaagtagaagaggctaatgagggagagaacaacagtctgttacaccctatatgccaacatgg
aatggatgatgaggagagagaagtattaaagtggaagtttgacagtgccctggcacggagacacatagcaagagaacaac
atccggagttctacaaagactgctgacacagaagttgctgacagggactttccgcccgggactttccaggggaggcgcgg
cctgggcggggttggggagtggctaaccctcagatgctgcataaaagcagccgcttctcgcttgtactgggtctctctag
ttagaccagatctgagcctgggagctctctggctagctaggraacccaykgytwaarcttcataa
>G.CU.1999.Cu74
tcgagcccccagatgctgcatataagcagccgcttctcgcctgtactgggtctctcttgctagaccagatttgagcctgg
gagctctctgactagcaggggaacccactgcttaagcctcaataaagcttgccttgagtgcttcaagtggtgtgtgcccg
tctgttgtgtgactctggtaactagagatccctcagaccactctagacggtgtaaaaatctctagcagtggcgcccgaac
agggacttgaaagcgaaagttaacagggactcgaaagcgaaagttccagagaagttctctcgacgcaggactcggcttgc
tgaggtgcacacagcaagaggcgagagcggcgactggtgagtacgccaaactttttgactagcggaggctagaaggagag
agatgggtgcgagagcgtcagtgttaagcgggggacgattagatgcatgggagaaaattcggctgaggccagggggaaag
aaaaaatatagaatgaaacatctcgtatgggcaagcagggagctggaaaaatttgcactcaaccctggccttttagaaac
atcaggaggttgtcaacaaataatgaaccaattgcaaccagctctccaaacagcaacagaggagcttaagtcattatata
atacagtagcaaccctctattgtgtacatcaaaagatagaggtaaaagacaccaaagaagctctagaggaagtggaaaag
gcacaaaagaaaagtcagcaaaaaacgcagcaagcagcaagggatgaaggaaacaacagccaagtcagtcaaaattatcc
tatagtgcagaatgcacaagggcaaccagtacaccaggccatatcacctagaactttaaatgcatgggtcaaagtagtag
aagaaaaggcctttagtccagaagtaatacccatgttttcagcattatcagaaggggccaccccacaagatttaaatacc
atgttaaacacagtgggggggcatcaagcagccatgcaaatgctaaaggatactatcaatgaggaagctgcagagtggga
caggctacacccaccgcaggcagggcctatcccaccaggccagataagagaaccaaggggaagtgatatagcaggaacta
ctagtaccctacaggaacaaataggatggatgactaacaatccacctatcccagtgggagaaatttataaaagatggata
atcctgggattaaataaaatagtaagaatgtatagccctgtcagcattttggatataaaacaagggccaaaagaaccttt
tagagattatgtagacaggttcttcaaaactttacgagctgagcaagctacacaggaagtaaaaggctggatgacagaca
ccttgttggtccaaaatgcgaacccagattgtaaggccatcttaagagcattaggaccaggagctacactagaagaaatg
atgacagcatgtcagggagtgggaggacccagccataaagcaagagttttagctgaagcaatgagccaggcatcaggtgc
aggagcagctgtactgatgcaaagaagcaattttaagggcccaagaagaaatattaagtgttttaactgtggcaaagaag
gacacctagccagaaattgcagggcccctaggaaaaagggctgttggaaatgtggaaaggagggacatcaaatgaaagac
tgcacagagagacaggctaattttttagggaaactttggccttccaacaaagggaggccggggaattttcttcaaaacag
gccagagccatcagccccacctgcagagagcttcgggttcggacaggagatagccccctccccgaagcaagagcagaagg
agaaggacttaatctccctcaaatcactctttggcagcgacccctagtcacagtaagaatagggggacagctaatagaag
ccctattagacacaggagcagatgatacagtattagaagatataaatttaccaggaaaatggaagccaaaaatgataggg
ggaattggaggttttatcaaagtaagacagtatgatcaaatactcatagaaatttgtggaaaaaaggctataggaacagt
tttagtaggacctacacctatcaacataattgggagaaatatgttgactcagatcggttgtactttaaattttccaatta
gtcctattgaaactgtaccagtaaaattaaagccaggaatggatggcccaaagattaaacaatggccattaacagaagag
aaaataaaagcattaacagacatttgtgcagatatggaaaaggaaggaaagatttcaaaaattgggcctgaaaatccata
caacactccaatatttgccataaaaaagaaagacagtactaaatggagaaaattagtagatttcagagagctcaataaaa
gaactcaagacttttgggaggtccaattaggaatacctcaccccgcggggttaaaaaagaaaaaatcagtaacagtacta
gatgtgggggatgcatatttttcagttcccttagataaagactttagaaagtatactgcattcactatacctagcacaaa
taatgagacaccagggattagatatcagtataatgtgcttccacagggatggaaaggatcaccagcaatatttcagagca
gtatgacaaaaatcttagagccctttagaaaacaaaatccagaaatagaaatctaccaatatatggatgatttatatgta
ggatctgacttagaaataggacagcatagagcaaaaatagaggaattaagacaacatctgttgagctggggatttaccac
accagataaaaaacatcagaaagagcctccattcctctggatggggtatgagctccaccctgacaaatggacagtacaac
ctatacagctgccagataaagaaagctggactgtcaatgatatacaaaagttagtgggaaagctaaattgggcaagtcag
atttatccagggattaaagtaaaacaattatgtaaactccttcggggggccaaagcattaacagacatagtaccactgac
tgaagaagcagaattggaattggcagagaacagggaaattctaaaagaacctgtacatggagtctattatgacccatcaa
aagaaataatagcagaagtacagaaacaagggaacgaccaatggacgtatcaaatttatcaagagccatacaagaatctg
aaaacaggaaaatatgcaaaaagggggtctgcccacactaatgatgtaaaacaattagtagaagtagtgcaaaaaatatc
cacagagagcatagtaatatggggaaaaactcctaaatttaaactacctatacgaaaagaaacatgggaagtatggtgga
cagactattggcaggccacctggattcctgattgggagtttgtcaataccccacctctagtaaaattatggtatcggtta
gagacagagcccatactgggagcagaaacttattatgtagatggggcagctaacagggaaacaaaattaggaaaagcagg
atatgttactgacaaaggaaaacaaaaggttattaccctaactgatacaacaaaccaaaaaactgaattacaagcaattc
agctagctttgcaggactcaggatcagaagtaaacatagtaacagactcacagtatgcattaggaatcattcaagcacaa
ccagataggagtgaatcagaattagtcaatcaaataatagaacaactaataaaaaaggaaaaggtctacctgtcatgggt
accagcacacaaagggattggaggaaatgaacaagtagataaattagtcagtactggaatcaggaaagtactatttttag
atggcatagataaagcccaagaagaacatgaaagatatcacagcaattggagagcaatggctagtgattttaatctgcca
cctataatagcaaaagagatagtggccagctgtgataaatgtcagctaaaaggggaagccatgcatggtcaagtagactg
tagtccaggaatatggcaattagattgtacacatttagaaggaaagattatcctggtagcagtccatgtggccagtggct
atatagaagcagaagttattccagcagaaacaggacaggaaacagcatactttatactaaaattagcaggaagatggcca
gtgaaagtgatacatacagacaatggcagcaatttcaccagtgctgcagtaaaggcagcatgttggtgggcaaatatcac
acaagaatttggaatcccctacaatccccaaagccaaggagtagtggaatctatgaataaagaattaaagaaaatcattg
ggcaggtcagggatcaagctgaacaccttaagacagcagtacagatggcagtattcattcacaattttaaaagaaaaggg
gggattggggggtacagtgcaggggaaagaataatagatataatagcatcagatatacaaactaaagaactacaaaaaca
aattacaaaaattcaaaattttcgggtttatttcagggacagcagagacccaatttggaaaggaccagcaaaactactct
ggaaaggtgaaggggcagtagtgatacaagacaataacgaaataaaggtagtaccaaggagaaaagcaaagatcattagg
gattatggaaaacagatggcaggtgatgcttgtgtggcaggtagacaggatgaggattagaacatggaacagtttagtaa
aacatcatatgtatgtctcaaagaaagctaaagactggtggtatagacatcactatgaaagcagacatccaaaaataagt
tcagaagtacacatcccactaggagatgctagactaatagtaagaacatattggggtctgcatacaggagaaaaagattg
gcacttgggtcatggggtctccatagaatggaagcagagaaaatatagcacacaaatagatcctgacctagcagaccaac
tgattcatctgcattattttaaatgtttttcagactctgccataagacaagccatattaggagaagtagttagacctagg
tgtgaatatcaagcaggacacaagaaggtaggatctctacaatatttggcactgaaagcattagtaacaccaacaaagat
aaagccacctttgcctagtgttaagaaattaacagaagatagatggaacaagccccagaggaccaggggccacagagaga
accccacaatgaatggacattagaattgttagaggagcttaaaaatgaagctgttagacattttcctaggccctggctcc
atggcttaggccagtatgtctataacacttatggggatacttgggaaggagttgaagccataataagaatactacaacaa
ctactgtttatccatttcagaattgggtgccgacatagcagaataggcattagtctacggagaagagtaagggatggacc
cggtagatcctaacctagagccctggaatcatccagggagtcagcctaaaactgcttgtaacaattgctattgtaaaaga
tgttgctggcattgtcaaagttgctttctacacaaaggcttaggcatctcctatggcaggaagaagcggaagcaccgacg
aggaactcctcagggcagtaaggatcatcaaaatcctgtaccaaagcagtaagtactgacaattagtctatgtaatgaag
tcattagaaatatctgcaatagtaggattaataatagcaggcatagcagccatagttgtgtggaccatagttttcataca
atatagagaaataagaaaacagaaaaaaatagataggatacttgaaagaataagagaaagagcagaagacagtggaaatg
agagtgagggggatacagaggaattgtcagcacttgtggaaatgggggactttgatcattgggttggcgataatttgtag
tgcctcaartaacttgtgggtcacaatctattatggggtacctgtgtgggaagacgcagatgcccctctattttgtgcat
ctgatgctaaagcatatagtactgaaagccataatgtctgggctacacatgcatgtgtacccacagaccccaacccacaa
gagatacctctggaaaatgtaacagaaaagtttaacatgtggaaaaataacatggtagaacagatgcatgaggatataat
tagtttatgggatgaaagtctaaagccatgtgtaaagctaacccctctctgtgttactttaaactgtgttaatgtaagtt
gcaccaacagcactgggagaaattgctctgtggaaaaaggtgaagaaataaaaaactgctctttcaatataaccacagag
ataaaggataaaaagaaacaagaatatgcgcttttctatagacttgatatagtgccaattaatgataatagagataatag
tacagttagtaatagtagcccagaaaactataggctaataaattgtaatgtctcagccattaaacaggcttgtccaaagg
tgtcttttgacccaattcccatacattattgtgctccagctgggtttgcgattctaaaatgtagggataaggagttcaat
ggaacaggaccatgtaataatgtcagtacagtacaatgtacacatggaattaagccagtggtatcaactcaattactgct
gaatggcagcttagcagaaaaagaaataatgattagatctgaaaacctcacaaacaatgccaaagtcataatagtgcagc
ttaatgaaactatagaaattaattgtaccagacccaacaacaatacaagaaaaagtatacgatttggaccaggacaagcg
ttctatgcaacaggtgacataataggagatataagacaagcacattgtgaggttaatggaacaaaatggaatgagacact
acagaaggtaaaagaaaaactaaaggaaagctacaacaaaaagaacataacatttgggaacataacatttgaacaatcca
caggaggggacctagaaattacaatgcatagttttatctgtagaggagaatttttctattgtaatacatcaaaactgttt
aatagtagtwatatgkgtaatagtactgggaatggcccattcaaactcccatgyaagataaaacagattgtgaggatgtg
gcagagagtaggacaagcaatgtatgcccctcccatcgcaggaaacattacatgtgtatcaaacattacaggactattat
taacaagagatggtggaactaataatactaatagaactgaggtcttcagacctgcaggaggagacatgagggacaattgg
agaagtgaattatataggtataaagtagtaaaaattaaaccactaggagtagcacccaccarggcaaggagaagagtggt
ggagagagaaaaaagagcagtaggaatgagagctgtcttccttgggttcttaggagcagcaggaagcactatgggcgcgg
cgtcaataacgctgacggtacaggtcaggcaattattgtctggcatagtgcaacagcagagcaatttgctgagggctata
gaggcgcagcagcatctgttgcaactcacagtctggggcattaaacagctccaggcaagagtcctggctgtagaaagata
cctaaaggaccaacagctcctagggctttggggctgctctggaaaactcatctgcaccactaatgtgccctggaacgcta
gttggagtaataaatctgttgatgaaatttggggaaacatgacctggatagaatgggagagggaaattaacaattacaca
gcacaaatatacagcttaattgaagaatcgcagaaccagcaggaaaagaatgaacaagacttattggcattggacaagtg
ggcaagtttgtggacttggtttgacatatcaaactggctatggtatataaaaatatttataatgatagtaggaggcttaa
taggtttaagaatagtttttactgtgctttctttaataaatagagttaggaagggatactcacccttgtcattccagacc
cctacccaccaccagagggaacccgacaggcccgaaagaatcgaagaaggaggtggcgagcaagacagaaacagatccat
tcgattagtgagcgggttcttagcacttgcctgggacgatctrcggagcctgtgcctcttcagctaccaccgcttgagag
acttagtcttgattgcagcaaggacagtggaacttctgggacacagcagtctcaagggactgagactggggtgggaaggc
ctcaaatatctgtggaatctcctggtgtattggggtcaggaactaaagaatagtgctattaatttggttgatacagtagc
agtagcagtagctaactggacagatagggttatagaaatagtacaaagaacttgtagggcttttctcaacatacctagaa
ggataagacaaggctttgaaagggcgctgcagtaaaatgggaggcaaatggtcaaaaagtagtatagttggatggcctgc
ggtaagggaaagaataaggcaaacccctccagcagcagcaggagtaggagcagtatctcaagatttagctaggcatggag
caattacaagcagtaatacagcagccaataaccctgattgtgcctggctgcaagcacaagaggaagattcagaagtaggc
tttccagtcagaccacaggtacctttgagaccaatgacctataaggctgcttttgatctcagcttctttttaaaagaaaa
ggggggactggatgggctaatttactccaagaaaagacaggacatccttgacctgtgggtctataatacacaaggattct
tcccagactggcagaactacacaccagggccagggacaagatatccactgacctttgggtggtgcttcaaactagtacca
ctggatccagcagagatagaggaggccactaagggagagaacaacagtttattacatcccatctgccagcatggaatgga
ggacgatgacagagaagttctgatatggagatttgacagtagcctagcacggagacacttagcccgagagctgcatccgg
atttctataaagactgctgacacagaagttgctgacaagggactttccgcctgggact
>19_cpx.CU.1999.CU7
ggctagaagagagagatgggggcgagagcatcattattaagtgggggaaaattagatgcatgggaaaaaattcggttaag
tcccgggggaaagaaacaatatagaatgaaacatttagtatgggcaagcagggagttggaaagattcgcaattaacccta
gccttttagaatcagcagaaggatgtcagcaaataatagaacagttacaatcaactctcaagacaggatcagaagaactt
agatcattatttaatacagtagcaaccctctggtgcgtacatcagcagatagaggtaaaagacaccaaggaagctttaga
taaattagaggaagtacagaataagagcaagcaaaagacacagcaggaaacagctgacacaaggaacagcagccacgtca
gccaaaattatcctatagtgcacaagctgcaggggcaaatggtacatcaggccctgtcacctagaactttgaacgcgtgg
gtaaaagtaatagaagagaaggctttcaacccagaagtaatacccatgttttcagcgttgtcagaaggagccaccccaca
agatttaaacaccatgttaaatacagtggggggacatcaagcagccatgcaaatgttaaaagagaccatcaatgaggaag
ctgcagaatgggataggttacatccagtgcatgcagggcctattgcaccaggccagatgagagaaccaaggggaagtgat
atagcaggaactactagtacccttcaggaacaaatagcctggatgacatccaatccacctatcccagtaggagagatata
taaaagatggataatcctgggattaaataaaatagtaagaatgtatagccctgtcagcattttggacataagacaaggac
caaaggaaccctttagagactatgtagatcggttctataaaactctaagagccgagcaagcttcacaggatgtaaaaaat
tggatgactgaaaccttgttggtccaaaatgcaaacccagattgtaaaactatcctaaaagcattgggaccaggggctac
attagaagaaatgatgacagcatgtcagggagtgggaggacctagtcataaagcaagagttttggctgaggcaatgagcc
aagcaacaaattcacatgctaccataatgatgcagaaaggtaattttaagggcctaagaaaagttgttaagtgtttcaac
tgtggcaaagaagggcacatagcaagaaattgcagagcccctagaaaaaagggctgttggaaatgtggaaaggaagggca
ccaaatgaaagattgcactgaaagacaggctaattttttagggaaaatttggccttcccacaaggggaggccaggaaact
tccttcagagcagaccagagccaacagccccaccagaagagagcttcgggtttggggaggaaataaccccctctcagaaa
caggatcagaaagacaaggaactgtatcccttagcctccctcaaatcactctttggcaacgaccccttgtcacaataaag
atagggggacagctaaaggaagctctattagatacaggagcagatgatacagtattagaagacataaatttaccaggaaa
atggagaccaaaaatgatagggggaattggaggttttatcaaagtaagacagtatgatcaaatacccatagaaatttgtg
gacagaaagctataggtacagtattagtagggcctacacctgtcaacataattggaagaaatttgttgactcagattggc
tgcactttaaattttccaattagccctattgaaactgtaccagtaaaattaaagccagggatggatggcccaaaagtgaa
acaatggccattgacagaagaaaaaataaaagcattaacagaaatttgtacagatatggaaaaggaaggaaaaatttcca
aaattgggcctgagaatccatataatactccaatatttgccataaagaaaaaagacagtactaagtggagaaaattggta
gatttcagagaacttaataagagaacccaagacttctgggaagttcaattaggaataccacatcctgcagggctaaagaa
gaaaaaatcagtaacagtattggatgtaggtgatgcatatttttcagttcccttagatgaaagctttagaaagtatactg
cattcaccatacctagtataaacaatgagacaccagggattagatatcagtacaatgtgcttccacagggatggaaagga
tcaccggcaatatttcaaagtagcatgacaaaaatcctagatccctttagaaaacaaaatccagaaatagttatctatca
atacatggatgatttgtatgtaggatctgacttagaaatagggcagcatagaacaaaaatagaggagttaaggcaacatc
tgttgaagtggggatttaccacaccagacaaaaaacatcagaaagaacctccgttcctttggatggggtatgaactccat
cctgataagtggacagtacagcctatatcactgccagaaaaagaaagctggactgtcaatgatatacagaagttagtggg
gaagctgaattgggcaagccagatttatccaggaattaaagtaagacagctatgtaaactccttaggggagccaaagcac
taacagaagtaataccactaacagaagaagcagaattagaactggcagaaaacagggaaattctaaaagaaccagtgcat
ggagtgtactatgacccatcaaaagacttaatagcagaagtacaaaaacaagggcaagaccaatggacatatcaaattta
tcaagaaccatttaaaaatctgaaaacaggaaaatatgcaaaaatgaggggtgcccacactaatgatgtaaaacaattaa
cagaggcagtgcaaaaaatatccttagaaagcatagtgatatggggaaagattcctaaatttagactacccatacaaaag
gaaacatgggaagcatggtggagggagtattggcaagccacttggattcctgagtgggagtttgtcaatacccctccttt
agtaaaattatggtaccagttagaaaaggaacccataatgggagcagaaactttctatgtagatggggcagctaatagag
agactaaattaggaaaagcaggatatgttactgatagaggaagacagaaagttgtctctctaactgacacaacaaatcag
aagactgagttacaagcaattaatctagctttgcaggattcgggattagaagtaaacatagtaacagattcacaatatgc
attaggaattattcaagcacaaccagataagagtgaatcagagttagtcagtcaaataatagagcagttaataaagaagg
aaagggtatacctggcatgggtaccagcacacaaagggattggaggaaatgaacaagtagataaattagtcagttctgga
attaggaaggtgctattcttagatgggatagataaggctcaagaagaacatgaaaaatatcacagcaattggagagcaat
ggctagtgattttaatctgccacctatagtagcaaaggaaatagtggccagctgtgataaatgtcagctaaaaggggaag
ctatgcatggacaagtagactgtagtccaggaatatggcaattagattgcacacatctagaaggaaaagtaatcctggta
gcagtccatgtggccagtggctacatagaagcagaagttatcccagcagaaacaggacaggagacagcatactttctgct
aaaattagcagcaagatggccagtaaaggtaatacacacagacaatggtcccaatttcaccagcgctgcagttaaagcag
cctgttggtgggcaaatgtccaacaggaatttgggattccctacaatccccagagtcaaggagtagtggaatctatgaat
aaagaattaaagaaaatcataggacaagttagggatcaagctgaacatcttaagacagcagtacaaatggcagtattcat
tcacaattttaaaagaaaaggggggattggggggtacagtgcaggggaaagaataatagacataatagcatcagacatac
aaactaaagaactacaaaaacaaattacaaaaatttcaaactttcgggtttattacagggacagcagagaccccatttgg
aaaggaccagcaaaactactctggaaaggtgaaggggcagtagtaatacaagacaatagtgacataaaagtagttccaag
aagaaaagcaaagatcattagagattatggaaaacagatggcaggtgatgattgtgtggcaggtagacaggatgaggatt
agaacatggaatagtttagtaaaacatcatatgtatatctcaaagaaagctaacaaatgggtttatagacatcactatga
aagcaggaatccaaaggtaagttcagaagtacacatcccactaggggatgctaaattagtagtaaaaacatattggggtc
tgcatacaggagaaaaagactggcacttgggtcatggggtctccatagaatggaggcagagaagatatagcacacaaata
gatcctgacctagcagatcaactgattcatctgcattattttgattgtttttcagactctgccataaggaaagccttatt
aggacaagtagttagacctaggtgtgaatatcaagcaggacataataaggtaggatctctacaatatttggcactgaaag
cattagtaacaccaacaaggagtaggccacctttgcctagtgttaggaaattaacagaggatagatggaacaagccccag
aaaaccaggggccacagagagaaccctacaatgaatgggcattagaactgttagaagaccttaagaatgaagctgttaga
cactttcctaggccatggcttcatggattaggacaatatgtctatacaacctatggggatacttgggaaggagttgaagc
tataataagaatactgcaacaactactatttattcatttcagaattgggtgccaacatagcagaataggcattactccac
gaagaagagtaagggatggacccggtagatcctaatctagagccctggaatcatccggggagtcagcctaaaactgcttg
taacacatgctattgtaaaaagtgttgctttcattgtcaactgtgctttacaaagaagggcttaggcatctcctatggca
ggaagaagcggagacagcgacgaggacctcctcagagtcatcaggatcatcaaaatcctgtaccaaagcagtaagtagta
tatgtgatgcaggctttacaaatagctgcaatagtaggactaatagtagcattcatagcagccatagttgtgtggaccat
agtgtatatagaatatagaaaaataagaaaagagagaaaaatagaaaagttacttgatagaataagagaaagagcagaag
acagtggcaatgagagtgatggggacacggaggagttatccacccttatggaattgggggactttgatccttgggttggt
gataatgtgtagtgcctttgacaacttgtgggtcacagtttattatggggttcctgtgtggagagatgcagaaaccaccc
tattttgtgcatcagatgctaaagcatatgatacagaggtgcataatgtctgggctacacatgcctgtgtacccacagac
cccagcccacaagaaataaatttggaaaatgtgacagaagagtttaacatgtggaaaaataacatggtagaacaaatgca
tgcagatataatcagtctatgggaccaaagcctaaagccatgtgtaaagttaacccctctctgcgttactttagattgcc
acatgaaaaactgctctttcaatatgaccacagaactaagagacaagaaacaacaaatatattcacttttctataagctt
gatatagtaccaattggtgataagataataaattgtaatacctcagccattacacaggcttgtccaaaggtcacctttga
gccaattcccatacattattgtgccccagctggttttgcgattctaaagtgtaatgataaggagttcaatggaacaggga
aatgccggaatgtcagcacagtacaatgcacacatggaatcaagccagtagtgtcaactcaactgctgttaaatggcagt
ctagcagaaggaaaggtgacaattagatctgaaaatatcacagacaatgccaaaaccataatagtacagtttactragcc
tgtaaaaattaattgtacacgacctaacaacaatacaagaacaagtgtacgtataggaccaggacaagtattttatgcaa
caggaataggggacataagacaggcacattgtaatgtcagtaaaaaagagtggaaagaagccttacaagaggtagctaaa
caattaacagtcctctttaacaaaacaataagctttgctaactcctcaggaggagatttagaaataacaacacatagttt
taattgtggaggagaatttttctattgtaatacaacagacctgtttaatagtagaagagactataactctccagtgcaga
ataaaacaagttgtaaatatgtggcagaagtaggacaagcaatgtatgcccctcccatcccaggagtaatacagtgtaaa
tctaatattacaggactactattaacaagagatggtgggaataacgagacctttagacctgctggaggaggtatgaggga
caattggagaagtgaattatataagtataaagtagtaaaaattgagccactaggagtagcacccaccaaggcaaagagaa
gagtggtggagagagaaaaaagagcaatgggactgggagctgtcttccttggattcttaggagcagcaggaagcactatg
ggcgcggcgtccataacgctgacggtacaggccagacaattattgtccggcatagtgcaacagcagagcaatttgctgaa
ggctatagaggctcaacaacagctgttgagactcaccgtctggggcattaaacagctccaggcaagagtcctggctctgg
aaagatatctaaaggatcaacagctcctaggaatttggggctgctctggaaaactcatctgcaccactactgtgccctgg
aactctagttggagcaatacatcctatgakgatatatggaacaatatgacatggctagaatgggataaagaaattaacaa
ttacccacagataatatataatctaatagaagaatcgcagaatcagcaagaaaagaatgaacaagaattattggcattgg
acaaatggggcaagttgtggaattggtttgatataacaaattggctgtggtatataaaaatatttataatgatagtagga
ggtttaataggtttaagaatagtctttgctgtactttctatagtaaatagagttaggcagggatactcacctttgtcatt
tcagacccttacccgacacagagggcccgacaggcacgaaagaatcgaagaaggaggtggagagcaagacaaagacagat
ccattcgattagtgaacggattcttagcacttgcctgggacgatctgaggagcctgtgccttttcagctaccaccgcttg
agagacttcatctcaattgcagcgaggactgtggaacttctgggacacagcgggtgggagggcctcaaatatctgtggaa
tcttctgttgtattggggtcaggagctaaaaactagtgctattagtttgcttaatactacagcaatagtagtagcggggt
ggacagatagggctatagaaataatacaaagagcttggagagctgttctccacatacctagaagaatcagacagggctta
gaaagggctttgctataaatggggggcaaatggtcaaaaagtagtataattggatggcctgctgtaagggaaagaatgca
aagagctgagccagcagcagatggggtaggagcagtatctcgagacctggaaaaacatggggcaatcacaagtagcaata
ccagagctactaatgctgattgtgcctggctagaagcacaagaagaggcagacgaagtaggttttccagtcagrcctcag
gtacctttaagaccaatgacttacaagggagctttagatctcagccactttttaaaagaaaaggggggactggaagggat
agtttggtctcagaaaagacaagacatccttgatctttgggtctatcacacacaaggttacttccctgattggcataatt
acacaccagggccagggatcaggtatccactgacctttggatggtgcttcgagctagtaccagtggatccaaaggaggca
gagaaagacactgaaggagagaacaactgcttgttacaccctgcgtgtcaacatggaatggatgacccagagaaagaagt
gttagtgtggagatttaacagcagactagcatttgarcacaaggccagaataaagcacccagagttctacaaagactgct
gacaccaagttttctacaagggactttccgcg

>19_cpx.CU.1999.CU7
ggctagaagagagagatgggggcgagagcatcattattaagtgggggaaaattagatgcatgggaaaaaattcggttaag
tcccgggggaaagaaacaatatagaatgaaacatttagtatgggcaagcagggagttggaaagattcgcaattaacccta
gccttttagaatcagcagaaggatgtcagcaaataatagaacagttacaatcaactctcaagacaggatcagaagaactt
agatcattatttaatacagtagcaaccctctggtgcgtacatcagcagatagaggtaaaagacaccaaggaagctttaga
taaattagaggaagtacagaataagagcaagcaaaagacacagcaggaaacagctgacacaaggaacagcagccacgtca
gccaaaattatcctatagtgcacaagctgcaggggcaaatggtacatcaggccctgtcacctagaactttgaacgcgtgg
gtaaaagtaatagaagagaaggctttcaacccagaagtaatacccatgttttcagcgttgtcagaaggagccaccccaca
agatttaaacaccatgttaaatacagtggggggacatcaagcagccatgcaaatgttaaaagagaccatcaatgaggaag
ctgcagaatgggataggttacatccagtgcatgcagggcctattgcaccaggccagatgagagaaccaaggggaagtgat
atagcaggaactactagtacccttcaggaacaaatagcctggatgacatccaatccacctatcccagtaggagagatata
taaaagatggataatcctgggattaaataaaatagtaagaatgtatagccctgtcagcattttggacataagacaaggac
caaaggaaccctttagagactatgtagatcggttctataaaactctaagagccgagcaagcttcacaggatgtaaaaaat
tggatgactgaaaccttgttggtccaaaatgcaaacccagattgtaaaactatcctaaaagcattgggaccaggggctac
attagaagaaatgatgacagcatgtcagggagtgggaggacctagtcataaagcaagagttttggctgaggcaatgagcc
aagcaacaaattcacatgctaccataatgatgcagaaaggtaattttaagggcctaagaaaagttgttaagtgtttcaac
tgtggcaaagaagggcacatagcaagaaattgcagagcccctagaaaaaagggctgttggaaatgtggaaaggaagggca
ccaaatgaaagattgcactgaaagacaggctaattttttagggaaaatttggccttcccacaaggggaggccaggaaact
tccttcagagcagaccagagccaacagccccaccagaagagagcttcgggtttggggaggaaataaccccctctcagaaa
caggatcagaaagacaaggaactgtatcccttagcctccctcaaatcactctttggcaacgaccccttgtcacaataaag
atagggggacagctaaaggaagctctattagatacaggagcagatgatacagtattagaagacataaatttaccaggaaa
atggagaccaaaaatgatagggggaattggaggttttatcaaagtaagacagtatgatcaaatacccatagaaatttgtg
gacagaaagctataggtacagtattagtagggcctacacctgtcaacataattggaagaaatttgttgactcagattggc
tgcactttaaattttccaattagccctattgaaactgtaccagtaaaattaaagccagggatggatggcccaaaagtgaa
acaatggccattgacagaagaaaaaataaaagcattaacagaaatttgtacagatatggaaaaggaaggaaaaatttcca
aaattgggcctgagaatccatataatactccaatatttgccataaagaaaaaagacagtactaagtggagaaaattggta
gatttcagagaacttaataagagaacccaagacttctgggaagttcaattaggaataccacatcctgcagggctaaagaa
gaaaaaatcagtaacagtattggatgtaggtgatgcatatttttcagttcccttagatgaaagctttagaaagtatactg
cattcaccatacctagtataaacaatgagacaccagggattagatatcagtacaatgtgcttccacagggatggaaagga
tcaccggcaatatttcaaagtagcatgacaaaaatcctagatccctttagaaaacaaaatccagaaatagttatctatca
atacatggatgatttgtatgtaggatctgacttagaaatagggcagcatagaacaaaaatagaggagttaaggcaacatc
tgttgaagtggggatttaccacaccagacaaaaaacatcagaaagaacctccgttcctttggatggggtatgaactccat
cctgataagtggacagtacagcctatatcactgccagaaaaagaaagctggactgtcaatgatatacagaagttagtggg
gaagctgaattgggcaagccagatttatccaggaattaaagtaagacagctatgtaaactccttaggggagccaaagcac
taacagaagtaataccactaacagaagaagcagaattagaactggcagaaaacagggaaattctaaaagaaccagtgcat
ggagtgtactatgacccatcaaaagacttaatagcagaagtacaaaaacaagggcaagaccaatggacatatcaaattta
tcaagaaccatttaaaaatctgaaaacaggaaaatatgcaaaaatgaggggtgcccacactaatgatgtaaaacaattaa
cagaggcagtgcaaaaaatatccttagaaagcatagtgatatggggaaagattcctaaatttagactacccatacaaaag
gaaacatgggaagcatggtggagggagtattggcaagccacttggattcctgagtgggagtttgtcaatacccctccttt
agtaaaattatggtaccagttagaaaaggaacccataatgggagcagaaactttctatgtagatggggcagctaatagag
agactaaattaggaaaagcaggatatgttactgatagaggaagacagaaagttgtctctctaactgacacaacaaatcag
aagactgagttacaagcaattaatctagctttgcaggattcgggattagaagtaaacatagtaacagattcacaatatgc
attaggaattattcaagcacaaccagataagagtgaatcagagttagtcagtcaaataatagagcagttaataaagaagg
aaagggtatacctggcatgggtaccagcacacaaagggattggaggaaatgaacaagtagataaattagtcagttctgga
attaggaaggtgctattcttagatgggatagataaggctcaagaagaacatgaaaaatatcacagcaattggagagcaat
ggctagtgattttaatctgccacctatagtagcaaaggaaatagtggccagctgtgataaatgtcagctaaaaggggaag
ctatgcatggacaagtagactgtagtccaggaatatggcaattagattgcacacatctagaaggaaaagtaatcctggta
gcagtccatgtggccagtggctacatagaagcagaagttatcccagcagaaacaggacaggagacagcatactttctgct
aaaattagcagcaagatggccagtaaaggtaatacacacagacaatggtcccaatttcaccagcgctgcagttaaagcag
cctgttggtgggcaaatgtccaacaggaatttgggattccctacaatccccagagtcaaggagtagtggaatctatgaat
aaagaattaaagaaaatcataggacaagttagggatcaagctgaacatcttaagacagcagtacaaatggcagtattcat
tcacaattttaaaagaaaaggggggattggggggtacagtgcaggggaaagaataatagacataatagcatcagacatac
aaactaaagaactacaaaaacaaattacaaaaatttcaaactttcgggtttattacagggacagcagagaccccatttgg
aaaggaccagcaaaactactctggaaaggtgaaggggcagtagtaatacaagacaatagtgacataaaagtagttccaag
aagaaaagcaaagatcattagagattatggaaaacagatggcaggtgatgattgtgtggcaggtagacaggatgaggatt
agaacatggaatagtttagtaaaacatcatatgtatatctcaaagaaagctaacaaatgggtttatagacatcactatga
aagcaggaatccaaaggtaagttcagaagtacacatcccactaggggatgctaaattagtagtaaaaacatattggggtc
tgcatacaggagaaaaagactggcacttgggtcatggggtctccatagaatggaggcagagaagatatagcacacaaata
gatcctgacctagcagatcaactgattcatctgcattattttgattgtttttcagactctgccataaggaaagccttatt
aggacaagtagttagacctaggtgtgaatatcaagcaggacataataaggtaggatctctacaatatttggcactgaaag
cattagtaacaccaacaaggagtaggccacctttgcctagtgttaggaaattaacagaggatagatggaacaagccccag
aaaaccaggggccacagagagaaccctacaatgaatgggcattagaactgttagaagaccttaagaatgaagctgttaga
cactttcctaggccatggcttcatggattaggacaatatgtctatacaacctatggggatacttgggaaggagttgaagc
tataataagaatactgcaacaactactatttattcatttcagaattgggtgccaacatagcagaataggcattactccac
gaagaagagtaagggatggacccggtagatcctaatctagagccctggaatcatccggggagtcagcctaaaactgcttg
taacacatgctattgtaaaaagtgttgctttcattgtcaactgtgctttacaaagaagggcttaggcatctcctatggca
ggaagaagcggagacagcgacgaggacctcctcagagtcatcaggatcatcaaaatcctgtaccaaagcagtaagtagta
tatgtgatgcaggctttacaaatagctgcaatagtaggactaatagtagcattcatagcagccatagttgtgtggaccat
agtgtatatagaatatagaaaaataagaaaagagagaaaaatagaaaagttacttgatagaataagagaaagagcagaag
acagtggcaatgagagtgatggggacacggaggagttatccacccttatggaattgggggactttgatccttgggttggt
gataatgtgtagtgcctttgacaacttgtgggtcacagtttattatggggttcctgtgtggagagatgcagaaaccaccc
tattttgtgcatcagatgctaaagcatatgatacagaggtgcataatgtctgggctacacatgcctgtgtacccacagac
cccagcccacaagaaataaatttggaaaatgtgacagaagagtttaacatgtggaaaaataacatggtagaacaaatgca
tgcagatataatcagtctatgggaccaaagcctaaagccatgtgtaaagttaacccctctctgcgttactttagattgcc
acatgaaaaactgctctttcaatatgaccacagaactaagagacaagaaacaacaaatatattcacttttctataagctt
gatatagtaccaattggtgataagataataaattgtaatacctcagccattacacaggcttgtccaaaggtcacctttga
gccaattcccatacattattgtgccccagctggttttgcgattctaaagtgtaatgataaggagttcaatggaacaggga
aatgccggaatgtcagcacagtacaatgcacacatggaatcaagccagtagtgtcaactcaactgctgttaaatggcagt
ctagcagaaggaaaggtgacaattagatctgaaaatatcacagacaatgccaaaaccataatagtacagtttactragcc
tgtaaaaattaattgtacacgacctaacaacaatacaagaacaagtgtacgtataggaccaggacaagtattttatgcaa
caggaataggggacataagacaggcacattgtaatgtcagtaaaaaagagtggaaagaagccttacaagaggtagctaaa
caattaacagtcctctttaacaaaacaataagctttgctaactcctcaggaggagatttagaaataacaacacatagttt
taattgtggaggagaatttttctattgtaatacaacagacctgtttaatagtagaagagactataactctccagtgcaga
ataaaacaagttgtaaatatgtggcagaagtaggacaagcaatgtatgcccctcccatcccaggagtaatacagtgtaaa
tctaatattacaggactactattaacaagagatggtgggaataacgagacctttagacctgctggaggaggtatgaggga
caattggagaagtgaattatataagtataaagtagtaaaaattgagccactaggagtagcacccaccaaggcaaagagaa
gagtggtggagagagaaaaaagagcaatgggactgggagctgtcttccttggattcttaggagcagcaggaagcactatg
ggcgcggcgtccataacgctgacggtacaggccagacaattattgtccggcatagtgcaacagcagagcaatttgctgaa
ggctatagaggctcaacaacagctgttgagactcaccgtctggggcattaaacagctccaggcaagagtcctggctctgg
aaagatatctaaaggatcaacagctcctaggaatttggggctgctctggaaaactcatctgcaccactactgtgccctgg
aactctagttggagcaatacatcctatgakgatatatggaacaatatgacatggctagaatgggataaagaaattaacaa
ttacccacagataatatataatctaatagaagaatcgcagaatcagcaagaaaagaatgaacaagaattattggcattgg
acaaatggggcaagttgtggaattggtttgatataacaaattggctgtggtatataaaaatatttataatgatagtagga
ggtttaataggtttaagaatagtctttgctgtactttctatagtaaatagagttaggcagggatactcacctttgtcatt
tcagacccttacccgacacagagggcccgacaggcacgaaagaatcgaagaaggaggtggagagcaagacaaagacagat
ccattcgattagtgaacggattcttagcacttgcctgggacgatctgaggagcctgtgccttttcagctaccaccgcttg
agagacttcatctcaattgcagcgaggactgtggaacttctgggacacagcgggtgggagggcctcaaatatctgtggaa
tcttctgttgtattggggtcaggagctaaaaactagtgctattagtttgcttaatactacagcaatagtagtagcggggt
ggacagatagggctatagaaataatacaaagagcttggagagctgttctccacatacctagaagaatcagacagggctta
gaaagggctttgctataaatggggggcaaatggtcaaaaagtagtataattggatggcctgctgtaagggaaagaatgca
aagagctgagccagcagcagatggggtaggagcagtatctcgagacctggaaaaacatggggcaatcacaagtagcaata
ccagagctactaatgctgattgtgcctggctagaagcacaagaagaggcagacgaagtaggttttccagtcagrcctcag
gtacctttaagaccaatgacttacaagggagctttagatctcagccactttttaaaagaaaaggggggactggaagggat
agtttggtctcagaaaagacaagacatccttgatctttgggtctatcacacacaaggttacttccctgattggcataatt
acacaccagggccagggatcaggtatccactgacctttggatggtgcttcgagctagtaccagtggatccaaaggaggca
gagaaagacactgaaggagagaacaactgcttgttacaccctgcgtgtcaacatggaatggatgacccagagaaagaagt
gttagtgtggagatttaacagcagactagcatttgarcacaaggccagaataaagcacccagagttctacaaagactgct
gacaccaagttttctacaagggactttccgcg

>20_BG.CU.1999.Cu103
tgcttcaagtagtgtgtgcccgtctgttgtgtgactctggtaactagagatccctcagaccactctagacagtgtaaaaa
tctctagcagtggcgcccgaacagggacttgaaagtgaaagttaaaagggactcgaaagcgaaagttccagagaagttct
ctcgacgcaggactcggcttgctgaggtgcacacagcaagaggcgagagcggcgactggtgagtacgccaaactttttga
ctagcggaggctagaaggagagagatgggtgcgagagcgtcagtattaagcgggggaaaattagatgaatgggagaaaat
tcggttgaggccagggggaaagaaaaaatatagaatgaaacatctcgtatgggcaagcagggagctggaaagatttgcac
ttaaccctggccttttagaaacagtagaaggttgtcaacaaataataaaccagttacaaccagctctcaaaacaggaaca
gaggagcttaagtcattatttaatacagtagcaaccctctattgtgtacatcaaaggataggggtaaaagacaccaaaga
agctctagatgaagtggaaaagttacaaaagaaaagtcagcaaaaaatgcaacaggcagcaacgggtgaaggaaacagca
gccaagtcagccaaaattatcctatagtgcagaatgcacaagggcaaccaatacaccaggccatatcacctaggacttta
aatgcatgggtaaaggtagtggaagaaaaggccttcagtccagaagtaatacccatgttttcagcattatcagaaggagc
caccccacaagatttaaataccatgctaaacaccgtgggggggcatcaagcagctatgcaaatgctaaaggatactatca
atgaggaagctgcagagtgggacaggacacacccacagcaggcagggcctatcccaccaggtcagataagagagccaagg
ggaagcgatatagcaggagctactagtaccctacaggaacaaataacatggatgaccaacaatccacctatcccagtggg
agaaatttataaaagatggataatcctgggattaaataaaatagtaagaatgtatagccctgtaagcattttggatataa
aacaagggccaaaagaaccctttagagattatgtagataggttcttcaaaactttacgagctgagcaagctacacaggag
gtaaaaggctggatgacagacaccttgttggtccaaaatgcgaacccagactgtaagaccatcttaagagcattaggacc
aggagctacactagaagaaatgatgacagcatgccagggagtgggaggacccggccataaagcaagagttttagctgaag
caatgagccaggtatcaggtgcaggagcatccatactgatgcaaaaaagcaattttaagggcccaaaaagaaatattaag
tgttttaactgtggcaaagaaggacacctagccagaaattgcagggcccctaggaaaaagggctgttggaaatgtggaaa
ggagggacatcaaatgaaggactgcacagagagacaggctaattttttagggaaactttggccttcccacaagggaaggc
cagggaattttctccagagcaggccagagccaacagccccacctgcagagagcttcgggttcggagaggagatagctccc
tccccgaagcaagggcagaaggagaaggacttaatctccctcaaatcactctttggcagcgacccctagtcacagtaaga
atagggggacagctaatagaagccctattagacacaggagcagatgatacagtattagaagatataaatttaccaggaaa
atggaaaccaaaaatgatagggggaattggaggttttatcaaagtaagacagtatgatcaaatacttatagaaatttgtg
gaaaaaaggctatagggacagtattagtaggacctacacctatcaacataattgggagaaatatgttgactcagattggt
tgtactttaaattttccaattagtcctatcgatactgtgccagtaaaattaaagccaggaatggatggcccaaaagtgaa
acaatggccattgacagaagaaaaaataaaagcattagtagaaatttgtacagaaatggaaaaggaaggaaaaatttcaa
aaattgggcctgaaaatccatacaacactccagtatttgccataaagaagaaagacagtactaaatggagaaaattagta
gatttcagagagctcaataaaagaactcaagacttctgggaggtccaattaggaataccccatcccgcggggttaaaaaa
gaaaaaatcagtaacagtactagatgtgggggatgcatatttctcagttcccttagatgaagattttagaaaatatacag
cattcactatacctagtataaataatgagacaccatggattagatatcagtacaatgtgcttccacagggatggaaaggg
tcaccagcaatattccaaagtagcatgacaaaaatcttagagccttttagaaaacaaaatccaggaatagttatttttca
atacatggatgatttatatgtaggatctgatttagaaatagggcagcatagaacaaaaatagaggaactgagacaacatc
tgtggaagtggggattttacacaccagataaaaaacatcagaaagagcccccattcctttggatgggatatgagctccac
cctgacaaatggacagtacaacctatacagctgccagacaaagacagctggactgtcaatgacatacagaagttagtggg
aaaattgaattgggcaagtcagatttatccagggattaaagtaaggcaactatgtaaactccttaggggaaccaaagcat
taacagaagtagtaccactaacaacagaagcagagctagaattggcagagaacagggaaattctaaaagaaccagtacat
ggagtgtattatgacccatcaaaagacttaatagcagaaatacagaagcaggggcaaggccaatggacatatcaaattta
tcaagaaccatttaaaaatctgaaaacaggaaagtatgcaagaatgaaaagtgcccacactaatgatgtaaaacagttag
cagaggcagtgcaaaaaatagcccaagaaagcatagtaatatggggaaagactcctaaatttaaattacctatacagaaa
gaaacatgggaaacatggtggatggagtattggcaagctacctggattcctgaatgggagtttgtcaatacccctccctt
agtgaaattatggtaccagttagagaaggaacccatagtaggagcagaaactttctatgtagatggggcagctaatagag
agactaaattaggaaaagcaggatatgttactgacagaggaaaacaaaaggttgtctccctaactgacacaacaaatcag
aagactgagttacaagcaattcatctagctttgcaggattcgggattagaagtaaacatagtgacagactcacaatatgc
attaggaatcattcaagcacaaccagataaaagtgaatcagagttagtcagtcaaataatagagcagttaataaaaaagg
aaaaggtttacctagcatgggtaccagcacacaaagggattggaggaaatgaacaagtagataaattagtcagtagtgga
atcaggaaagtactatttttagatggcatagataaagcccaagaagaacatgaaagatatcacagcaattggagagcaat
ggctaatgattttaatctgccacctatagtagcaaaagagatagtggccagctgtgataaatgtcagctaaaaggggaag
ccatgcatggccaagtagactgtagtccaggaatatggcaattagactgtacacatttagaaggaaaaattatcctggtg
gcagtccatgtggccagtggctatatagaagcagaagttatcccatcagaaacaggacaggaaacagcatactttatact
aaaattagctggaaggtggccagtgaaagtaatacatacagacaatggccccaatttcatcagtgctgcagtaaaggcag
catgttggtgggcaaatatcacacaagaatttggaattccctacaatccccaaagccaaggagtagtggaatctatgaat
aaagaattaaagaaaatcattgggcaggtgagggatcaagctgaacaccttaagacagcagtacagatggcagtattcat
tcacaattttaaaagaaaaggggggattggggggtacagtgcaggggaaagaataatagatataatagcatcagatatac
aaactaaagaactacaaaaacaaattacaaaaattcaaaattttcgggtttattacagggacagcagagacccaatttgg
aaaggaccagcaaaactactctggaaaggtgaaggggcagtagtaatacaagacaataacgaaataaaggtagtaccaag
gagaaaagcaaagatcattagggattatggaaaacagatggcaggtgatgattgtgtggcaggtagacaggatgaggatt
agaacatggcacagtttagtaaaacatcatatgtatgtctcaaagaaagctaaaggctggtggtatagacatcactttga
aagcagacatccaaaagtaagctcagaagtgcacatcccactaggagacgctaaactaatagtaagaacatattggggtc
tgcatacaggagaaaaagattggcatttgggycatggggtttccatagaatggaagcagagagaatatagcacacaaata
gatcctgacctagcagaccacatgattcatctgtattattttaattgtttttcagactctgccataagaaaagccatatt
aggagaaatagttagacctaggtgtgaatttcacgcaggacataataaggtaggatctctacaatatttggcactgaaag
cattagtaacaccaacaaagataaagccacctttgcctagtgttaggaaattaacagaagatagatggaacaagccccag
aggaccaggggccacagagagaaccccacaatgaatggacattagaactgttagaggagcttaaaaatgaagctgttaga
cattttcctaggccctggcttcatggcttaggagtgcatatctataacacttatggggatacttgggaaggagttgaagc
cctaataagaatactacaacaactactgtttatccatttcagaattgggtgccaacatagcagaataggcattagtctac
ggagaagagtaaggaatggacccagtagatcctaacctagagccctggaatcatccggggagtcagcctaaaactgcttg
taacaagtgctattgtaaagtgtgttgctggcattgtcaagtttgctttctgaacaagggcttaggcatctcctatggca
ggaagaagcggaagcaccgacgaggacctcctccgggtagcaaggatcatcaaaatcctgtaccaaagcagtgagtagtg
acaattaagtrtatgtaatgcaatctctagaagtagctgcaatagtaggattaatagtagcaggcatagcagccataatt
gtgtgggccatagttttcatactatataaggaaattagaaaacagaaaaaaatagataggatacttgaaagaataagaga
aagagcagaagacagtggaaatgagagtgaaggggatacagacgaattggcagtgcttgtggacatgggggactttgatc
attgggttggggataatttgtagtgcctcaaataatttgtgggttacagtctattatggggtacctgtgtgggaagacgc
aaatacccctctattttgtgcatctgatgctaaagcatatagtactgagagccataatgtctgggctacacatgcatgtg
tacctacagaccccaacccacaagagatacctctggaaaatgtaacagaaaattttaacatgtggaaaaataacatggta
gaacagatgaatgaggacataattagtttatgggatgaaagtctaaagccatgtgtaaagctaacccctctctgtgttac
tttaaactgtactaatttatcagtaaatagcactgtcacgtctagtgaagacataaacatctgctctttctatataacca
cagagataaaggatagaaagaagcaagagtacgcgcttttctatagacttgatgtagtgccaattaatgataagaatagt
aataatagtaataactatagtgactataggctaataaattgtaatgtctcagccattaaacaggcttgtccaaaggtgtc
ttttgatccaattcccatacattattgtgctccagctgggtttgcaattctaaaatgtagggataaggagttcaatggaa
caggaccatgtaaaaatgtcagtacagtacaatgtacacatggaattaagccagtggtatcaactcaattactgctgaat
ggcagcttagcagaaaaggaaataatgattagatctgaaaacctcacagacaatgccaaagtcataatagtgcagcttaa
taaaagtatagaaattaattgtaccagacccaacaacaatacaagaaagagtataggatttggaccaggacaagcgttct
atgcaacaggtgacataacaggagatataagacaagcattttgtgtggttaataaaacaaaatggaatgagatgctacag
aaggtaaaagcaaaactagctgaaagctacaataagaacataacaaacataaaatttagcccacccacaggaggggacct
agaaattacaacacatagttttaattgtagaggagaatttttctattgtaatacatcaggactatttaatagtagtaata
ataatagtggaaatatcacactcccatgcaggatcaaacagattgtgagaatgtggcagagagtaggacaagcaatgtat
gcccctcccatcgcagggagcattacatgtatatcaaacattacaggactattaataacaagagatggtgggaataacag
tactaataggactgagatcttcagacctgcagggggagacatgagggacaattggagaagtgaattatataagtataaag
tagtaaaaattaaaccactaggagtagcacccaccagggcaaagagaagagtggtgcagagagaaaaaagagcagttgga
ctgggagctgtcttccttgggttcttaggagcagcaggaagcactatgggcgcggcgtcaataacgctgacggtacaggt
caggcaattattgtctggcatagtgcaacagcagagcaatctgctgagggctatagaggcgcagcagcatctgttgcaac
tcacagtctggggcattaaacagctccaggcaagagtcctggctgtagaaagatacctaaaggaccaacagctcctaggg
ctttggggctgctctggaaaactcatctgcaccactaatgtgccctggaacactagttggagtaataaatcttataatga
aatttgggacaacatgacctggatagaatgggagagggaaattaacaattacacacaacaaatatacaccctaattgaag
aatcgcagaaccagcaggaaaagaatgaacaagacttattggcattggacaagtgggcaagtctgtggaattggtttaac
atatcaaactggctatggtatataaaattattcataatgatagtaggaggcttgataggtttaagaatagtttttactgt
gctttctataataaatagagttaggcagggatactcacccttgtcgttccagacccatacccaccaccagagggaacccg
acaggcccgaaggaatcgaaggaggaggtggagagcaagacaacgacagatccgtgcgcttagtgagcggattcttacca
cttgcctgggacgacctccggagcctgtgcctcttcagctaccaccgcttgagagacttactcttgattgcagcgaggac
agtggaacttctgggacgcagcagtctcaagggactgagactggggtgggaaggcctcaagtatctgtggaatctcctgg
ggtattggggtcaggaactaaagaatagtgctattaatttgcttgatacagtagcaatagcagtagctaactggacagat
agaattatagaaatagtacaaagaggatttagagcttttctgcacatacctagaaggataagacaaggctttgaaagggc
gctgctataaaatggggaacaaatggtcaaaaagttggcctgcggtaagggaaagactaaggcgaacccctccagcagca
gcaggggtaggagcagtatctcaagatttagctaagcatggagcaattacaagcagcaatacagcagccaacaatcctga
ttgtgcctggctggaagcacaagaagaagactcggaggtaggctttccagtcagaccacaggtacctctgagaccaatga
cctttaaggctgcttttgatctcagcttctttttaaaagaaaaggggggactggatgggctaatttactccaagcaaaga
caagacatccttgacctgtgggtctataatacacaaggctacttcccagattggcagaactacacaccagggccagggac
aagattcccactgacctttgggtggtgcttcaaactagtaccaatggatccagcagaggtagaggaagccaataatggag
agaacaacagcttattacatcccatctgccagcatgggatggaggataatgaaagagaagtgctgatatggagatttgac
agtagcctagcacggagacacttagcccgagagctgcatccggagttctacaaagactgctgacacagaagttgctgaca
aggggactttccgcctgggactttccggggaggcgtaacctgggaggggcgggga

>21_A2D.KE.1999.KER2003
gcgagagcgtcagtattaagcgggggaaaattagatgcttgggaaaaaattcggttacggccaggaggaaagaaacaata
cagactaaaacatttagtatgggcaagcagggagctagaacgatttgcaattaatcctggccttttagagacatcagaag
gctgtaaacaaataatagggcagctacaaccatctattcagacaggatcagaagaacttaaatcattatttaatacagta
gcaaccctctattgtgtacatgcaagaatagatgtaaaagacaccaaggaagctttagacaagatagaggaagaacaaaa
caaaagtaagaacaaagcgcagccagcagcagctaacacagggaacagcagccaggtcagccaaaattaccccatagtgc
aaaatgcacaagggcaatgggtacaccaggccatatcccctaggactttgaatgcatgggtcaaagtagtagaagaaaag
gctttcaacccagaagtaatacccatgttttcagcattatcagaaggagctaccccatcagatttaaactccatgctaaa
cacagtggggggtcatcaagcagccatgcaaatgctaaaagagaccatcaatgaggaagccgcggaatgggataggttac
atccagtgcaggcagggcctattgcaccaggccagatgagagaaccaagaggaagtgacatagcaggaactactagtacc
cttcaggaacaaatagcatggatgacaggcaatccacctatcccagtaggagaaatctataaaagatggataatcctagg
attaaataaaatagtaagaatgtatagccctgtcagcattttagacataagacagggaccaaaggaaccttttagagatt
atgtagaccggttctataaaactctaagagccgaacaagcttcacaggaagtaaaaaattggatgacagacaccttgctg
gtccaaaatgcgaacccagattgtaaatccatcttgaaagcattaggaccaggggctacattagaagaaatgatgacagc
atgccagggagtgggaggacccagtcataaagcaagagtgctagctgaggcaatgagccaagcaacaaactcagctgtta
cagtaatgatgcagagaggcaattttaagggcccaaaaagaattattaagtgttttaactgtggcaaagaagggcacata
gcaaaaaattgcagggcccctaggaaaaaaggctgttggaaatgtggaaaggaagggcaccaaatgagagattgcacgga
aagacaggctaattttttagggaaaatttggccttcctccaaggggaggccggggaactttcttcagagcaggtcagagc
caacagccccaccagcagagatgttcgggttcggggaagagataaccccctctcagaaacaggagcagaaagacaaggaa
ctgtatccctcagtttccctcaaatcactctttggcaacgaccccttgttacaataaaaatagggggacagctaaaggaa
gctctattagatacgggagcagatgatacagtattagaagaaatgaatttgccaggaaaatggaaaccaaaaatgatagg
gggaattgggggttttattaaagtaagacagtatgatcaaatacccctagaaatctgtggacataaagctataggcacag
tgttagtaggacctacacctgtcaacataattggaagaaatttgttgacccagattggctgcactttaaattttccaata
agccctattgaaactgtaccagtacaattaaagccagggatggatggcccaaaagttaaacagtggccattgacagaaga
aaaaataaaagcattaacagaaatttgtatggatatggaaaaggaaggaaaaatttcaagaattgggcctgaaaatccat
acaatactccaatatttgctataaagaaaaaggacagtaccaagtggagaaaactagtagacttcagagaacttaataag
agaactcaagatttctgggaagtccaattaggaataccacatcctgcarggctgaaaaagaaaaaatcagtaacagtact
agatgtgggtgatgcatatttttcggtccccttaagtgaagactttagaaaatataccgcatttaccatacctagtataa
acaatgagacaccagggattagatatcagtacaatgtgcttccacaaggatggaaaggatcaccggcgatattccaaagt
agcatgacaaaaatcttagagccctttagaaaacaaaatccagaaatggttatctatcaatacatggatgatttgtatgt
aggatctgacttagaaataggacagcatagaacaaaaatagaggaattaagagaacatctattgaggtggggattgacca
caccagataaaaaacatcagaaagaaccaccatttctttggatgggttatgaactccatcctgataaatggacagtacag
cctataaaactgccagaaaaggagagctggactgtcaatgatatacagaagttagtgggaaaattaaactgggcaagcca
gatttatccaggaattaaagtaaggcagttatgtaaactccttaggggaaccaaagcactaacagaagtaataccactaa
cagaagaagcagaattagaactggcagaaaacagggaaattctaaaggaaccagtacatggggtatactatgacccatca
aaagacttaatagcagaaatacagaaacaaggacaagaccaatggacatatcaaatttatcaagagccatttaaaaatct
aaaaacagggaaatatgcaaaaaagaggtccacccacactaatgatgtaaaacaactaacagaagcagtacaaaaaatag
ccatggaagccatagtaatatggggaaaaacccctaaatttagattacccatacaaaaagaaacatgggagacatggtgg
atggagtattggcaggctacctggattcctgagtgggagtttgtcaataccccccctctagtaaaactatggtaccagtt
agaaaaagaacccatagtaggagcagaaactttttatgtagatggggcagctaatagagagactaaactaggaaaggcag
ggtatgtcacggacagaggaagacaaaaaattgtctccctgacggagacaacaaatcaaaggactgaattacatgcaatc
tatttggctttacaggattcaggattagaagtgaacatagtaacagattcacagtatgcattaggaatcattcaggcaca
gccagataggagtgaatcagagttagtcaatcaaataatagaacagttaataggaaaaaaaagggtctatctgtcatggg
taccagcacacaaagggattggaggaaatgaacaagtagacaaattagtcagttctgggattaggaaagtgttattttta
gatggaatagataaggctcaagaagaacatgaaaaatatcacagtaattggagagcaatggctcatgactttaatctacc
acctatagtagcaaaagaaatagtagctagctgtgataaatgtcagctaaaaggggaagccatgcatggacaagtagact
gtagtccaggaatatggcaactagattgcacacatttagaagggaaagttatcctggtagcagtccatgtagccagtggc
tatatagaagcagaagtcatcccagcagaaacaggacaggaaacagcatactttttattaaagctagcaggaagatggcc
agtaaaagtaatacatacagacaatgggcccaatttcatcagtgcagcagttaaggccgcctgctggtgggcaggtatca
aacaggaatttgggattccttacaatccccaaagtcaaggagtagtggaatctatgaataaagaattaaagaaaatcata
gggcaggtaagagatcaagctgaacaccttaagacagcagtacaaatggcagtattcattcacaactttaaaagaaaagg
ggggattggggactacagtgcaggggaaaggataatagacataatagcaacagatatacaaactaaagaattacaaagac
aaattacaaaaattcaaaattttcgggtttatttcagagacagcagagatccaatttggaaaggaccagcaaaactcctc
tggaaaggtgaaggggcagtagtaatacaagacaatagtgatataaaggtagtaccaagaagaaaagtaaaaatcattag
ggattatggaaaacagatggcaggtgatgattgtgtggcaagtagacaggatgaggattagaacatggaacagtttagta
aaacatcatatgtatatttcaaagaaagctagaaggtggttctatagacatcactatgaaagcagacatccaagagtgag
ttcagaagtacacattccgctaggggaagctacactaatagtaagaacatattggggtctgcactcgggagaaaaggact
ggcacttggggcatggggtctccatagaatggagacagaaaagatatagtacacaaatagaccctgatctggcagaccac
ctaatccatctgcattattttgactgtttttcagacactgccataaggaaagccatattaggagaactagttagtcctag
gtgtgaatatcaagcaggacataacaaggtaggatctctgcaatatttggcattgaaagtattagtagctgcaaagagga
caaagccacctctgcctagtgtaagaaagctaacagaagatagatggaacaagccccagaagatcaagggccacagagag
agccacatgatgaatggacattagagcttttagaggagcttaagagtgaagctgttagacattttcctaggccatggctc
catagcttgggacaacatatttatgcaacctatggggatacctgggccggagttgaagctatgataagaattctgcaaca
attactgtttatccatttcagaattgggtgtcaccatagcagaataggtgttattcgacagaggagagcaagaaatggat
ccagtagatcctaacctagagccctggaaccatccaggaagtcagcctaggactgcttgtaacaagtgtcattgtaaaag
gtgttgctatcattgcataaagtgcttcttgacgaaaggcttaggcatccgctatggcaggaagaagaggagacagcgac
gacgacctcctcaaggcgatcaggctcatcaagttcctgtaccaaagcagtgagtagtacgtgtaatgcaagctttacag
ataatagcaatagcagcattagtagtagcaacaataatagcaatagttgtatggaccatagtatttatagaatatagaag
aataaaaagacaaaggagaatagactgtttaattgatagaataagagaaagagcagaagacagtggcaatgagagtgagg
gagatagagaggaattgtcaaaacttgtggaaatggggcattatgctccttggaatattgatgacctgtagtgctgcagg
caatctgtgggtcacagtttattatggggtgcctgtatggaaggaagcaaacactactctattttgtgcatcagatgcta
aagcatattcaacagagaagcataatatctgggccacacatgcctgtgtacccacggaccccaacccacaagaaatggaa
ctgggaaatgtgacagaaaactttaacatgtggaaaaataacatggtggaacagatgcatgaggatataatcagtttatg
ggatcaaagcctaaaaccatgtgtaaaattaaccccactctgtgtcactttaaactgcaatgatcaagtgaggaacagcg
aagggagtacccaaaacattaaccagacagtggatatgaaaaactgctctttcaatataaccacagtggtaagagataag
aggaagcaagtatatgcacttttttataaacttgatatagtaccaataaacaatgatgataataccactagtacctatag
gttaataaattgtaatacctcagccattacacaggcttgtccaaaggtatcctttgaaccaattcccatacattattgtg
ccccagctggttttgcgattctaaagtgtagagataagaggttcaatggaacaggcccatgcacaaatgtcagcacagta
cagtgtacacatggaattaagccagtggtatcaactcaactgctgttgaatggcagtttagcagaagaagagatcataat
tagatctgaaaatcttacagacaatgctaaaaccataatagtacagcttaatgaatctgtagtaattaattgtacaaggc
ccggtaacaatacaagacaaggtatacatataggaccagggcaagcactttatacaaccaagataataggagacataagg
caagcacattgtaatatcagtggagcagaatggaataaaactttacaaagggtagctataaaattaagaagactttttaa
caacaaaacaataacttttaatcactcctcaggaggggatccagaaattgtaacacacagttttaattgtggaggggaat
tcttctactgtaatacaacacaactgtttaatagcacatggaacagtacagagtcaagcacatggaacagtacagagtca
aataatagcacaatcacactcccatgcagaataaaacaaattataaatatgtggcaagaagtaggaaaagcaatgtatgc
ccctcccatcgaaggacacattaactgttcatcaaatattacagggctactattgacaagagatggtggtacaaataata
caagtaatatggagatcttcagacctggaggaggaaatatgaaggacaattggagaagtgaattatataaatataaggta
gtaagaattgaaccactgggagtagctcccaccagggcaaagagaagagtagtggatagagaaaaaagagcaataggact
aggagctatgttccttgggttcttgggagcagcaggaagcacgatgggcgcagcgtcagtgacgctgacggtacaggcca
gacaattattgtctggtatagtgcaacagcaaaataatttgctgatggctatagaggcgcaacaacatctgttgcaactc
acagtctggggcattaaacagctccaggcaagagttttggctgtggaaagatacctaaaggatcaacagctcctaggaat
gtggggttgctctggaaaacacatttgtaccactgatgtgccctggaactctagttggagtaataaatctctagatgaca
tttggcagaacatgacctggatgcagtgggaaagggaaattgacaattacacaggcaaaatatatagcttacttgaagaa
tcgcagatccagcaagacaagaatgaaaaagaattattagaattggaccagtgggcaagtttgtggaattggtttaacat
atcacaatggctgtggtacataagaatattcataatggtagtaggaggcttgataggtttaagaatagtttttgctgtgc
tctctttagtgaatagagttaggcagggatactcacctctgtcatttcagaccctcctcccagccccgaggggacccgac
aggcccgaaggaatagaagaagaaggtggagagcgaggcagagacagatccattcgattgctgaacggattgtcagctat
catctgggacgatctgaggaacctgtgcctcttcagctaccaccgattgagagacttaatcttaattgcagggaggattg
tggagcttctgggacgcaggggggaggaaggcctcaaatatctgtggaatctcctgcaatattggggtcgggaactgagg
aatagtgctaatagcttgtataatgccacagcaatagcagtagctgaggggacagatagggttatagaaatagtacgaag
agcttgcagagctattctcaacatacctagaagaatcagacagggcttcgaaagggctttactataaaatggggggcaag
tggtcaaaaagtagcatagttggatggcctactataagggaaagaataagaagaactgatccagcagcagatggggtagg
accagcatctcgagacctggaaagacatggggcaatcacaagtagtaatacagcaaccacgaacccagattgcgcctggc
tggaggcgcaagaggaggatgagggagtaggcttcccagtcaggccacaggtgcctataagaccaatgacctacaaggga
gcttttgacctcagccactttttaaaagaaaaggggggactggatgggttaatttactcccagaaaagacaagaaatcct
tgatctgtgggtctaccacacacaaggcttcttccctgattggcagaattacacaccagggccagggaccagattcccac
taacatttggatggtgcttcaaactagtaccagttgatccatctgaggtagaagaggatactaagggagagaacaacagc
ttattacaccctatgtgccaacaaggaatagatgaccctgagagagaagtgttaaggtggaagtttgaccctcacctggc
actgaaacacagagcccaagagaagcatccggagttctacaaagattgctgacacagaagcccaaagctgctgacactga
gttgtctacaagggactttccactggggctttccgggaggcgtggacggggcgggaattgggagtggctaaccctcagat
gctgcatataagcagctgcttttcgcttgtactgggtctcttagctagaccagatttgagcctgagagctctctggctag
ctaggaacccactgct

>23_BG.CU.2003.CB118
ttgtgtgactctggtaactagagatccctcagaccactctagacagtgtaaaaatctctagcagtggcgcccgaacaggg
acttgaaagcgaaagttaaaagggactcgaaagcggaagttccagagaagttctctcgacgcaggactcggcttgctgag
gtgcacacagcaagaggcgagagcggcgactggtgagtacgccaaamtttttgactagcggaggctagaaggagagagat
gggtgcgagagcgtcagtattaagcgggggaaaattagatgcatgggagaaaattcggttgaggccagggggaaagaaaa
aatatagaatgaaacatctcgtatgggcaagcagggagctggacagatttgcacttaaccctggccttttagaaacagca
gaaggttgtcaacaaataatgagccagttgcaaccagctctcaaaacaggaacagaggaaattaagtcattatttaatgc
agtagcaaccctctattgtgtacatcaaaggatagaggtaaaagacaccaaagaagctctagatgaagtggaaaagttac
aaaagaaaagtcagcaaaaaatgcaacaggcagcaacgggtgaaggaaacagcggccaagtcagccaaaattatcctata
gtgcagaatgcacaagggcaaccagtacaccaggccatatcacctaggactttaaatgcatgggtaaaagtagtagaaga
aaaggccttcagtccagaagtaatacccatgttttcagcattatcagaaggagccaccccacaagatttaaataccatgc
taaatacagtggggggacatcaagcagctatgcaaatgctaaaggatactatcaatgaggaagctgcagagtgggacagg
ctacacccacagcaagcagggcctatcgcaccaggtcaaataagagagccaaggggaagcgatatagcaggaaccactag
taccctacaggaacagataagatggatgaccaacaatccacctatcccagtgggagaaatttataaaagatggataatcc
tgggattaaataaaatagtaagaatgtatagccctgtaagcattttggatataaaacaagggccaaaagagccttttaga
gattatgtagatagattcttcaaaactttacgagctgagcaagctacacaggaagtaaaaggctggatgacagacacctt
gttggtccaaaatgcgaacccagattgtaagaccatcttaagagcattaggaccaggagctagtctagaagaaatgatga
cagcatgtcagggagtaggaggacctggccataaagcaagagttttagctgaagcaatgagccagataccaggtgcagga
gcatccataatgatgcaaagaagcaactttaagggcccaaaaagaaatattaagtgttttaactgtggcaaagatggaca
cctagccagaaattgcagggcccctaggaaaaagggatgttggaaatgtggaaaggatggacatcaaatgaaagactgca
cagaagggagacaggctaattttttagggaaactttggccttcccacaagggaaggccagggaactttcctcagaacagg
ctagagccaacagccccacctgcagagagcttcggattcggagaggagatagccccctccccgaagcaagggccgaagga
gcaggacttaatctccctcaaatcactctttggcagcgacccctagtcacagtaagaatagggggacagctaatagaagc
cctattagacacaggagcagatgatacagtattagaagatataaatttaccaggaaaatggaaaccaaaaatgatagggg
gaattggaggttttatcaaagtaagacagtatgatcaaatacctatagaaatttgtggaaaaaaggctatagggacagta
ttagtaggacctacacctaccaacataattgggagaaatatgttgactcagattggttgtactctaaattttccaattag
tcctatcgaaactgtaccagtaaaattaaagccaggaatggatggcccaaaagtgaaacaatggccattgacagaagaaa
aaataaaagcattagtagaaatttgtacagaattggaaaaggaaggaaaaatttcaaaaattgggcctgaaaatccatac
aacactccagtatttgccataaagaaaaagaacagtactaagtggagaaaattagtagatttcagggaacttaataagag
aactcaagacttctgggaggtccaattaggaatacctcaccccgcgggtttaaaaaagaaaaaatcagtaacagtactag
atgtgggggatgcatatttttcagttcccttagatgaagaatttagaaaatatacagcatttactatacctagtataaat
aatgagacaccagggattagatatcagtacaatgtgcttccacagggatggaaagggtcaccagcaatattccaatgtag
catgacaaaaatcctagagccttttagaaaacaaaatccagaattagttatttatcaatacatggatgatttatatgtag
gatctgacttagaaattgggcagcatagagcaaaaatagaggaactgagacaacatctgttaaagtggggatttaccaca
ccagacaaaaaacatcagaaagaacctccatttctttggatgggttatgaactacatcctgataaatggacagtacagcc
tatagtgctgccagaaaaagacagctggactgtcaatgacatacagaagttagtgggaaaattgaattgggcaagtcaga
tttatccagggattaaagtaaagcaactatgtaaactccttaggggaaccaaagcactaacagaagtagtaccactgact
gcagaagcagaattggaattggcagaaaacagggaaattctaaaagaaccagtacatggagtgtattatgacccatcaaa
agacttaatagcagaaatacagaagcaggggctaggccaatggacatatcaaatttatcaagaaccatttaaaaatctga
aaacaggaaagtatgcaagaatgaaaagtacccacactaatgatgtaaaacagctaacagaggtagtgcaaaaaatagca
caagaaagcatagtaatatggggaaagactcctaaatttagattacccatacaaaaagaaacatgggaagcatggtggat
ggagtattggcaagccacctggattcctgaatgggagtttgtcaatacccctcccttagtaaaattatggtaccagttag
agaaagaacccatagtaggagcagaaactttctatgtagatggggcagctaatagagagactaaattaggaaaagcagga
tatgttactgacagaggaaaacaaaaggttgtctccctaactgacacaacaaatcagaagactgagttacaagcaattca
tctagctttgcaggactcaggatcagaagtaaacatagtgacagactcacaatatgcattaggaatcattcaagcacaac
cagataaaagtgaatcagagttagtcagtcaaataatagagcaattaataaaaaaggaaaaggtttacctagcatgggta
ccagcacacaaagggattggaggaaatgaacaagtagataaattagtcagtagtggaatcaggaaagtactatttttaga
tggcatagataaagcccaagaagagcatgaaaaatatcacagcaattggaaagcaatggctagtgactttaatctgccac
ctgtagtagcaaaagagatagtggccagctgtgataaatgtcagctaaaaggggaagccatgcatggccaagtagactgt
agtccaggaatatggcaattagattgtacacatttagaaggaaaaattatcctggtagcagtccatgtggccagtggcta
tatagaagcagaagttatcccagcagaaacaggacaggaaacagcatactttatactaaaattagctggaaggtggccag
tgaaagtaatacatacagayaatggccccaatttcatcagtgctgcagtaaaggcagcatgttggtgggcagatatcaca
caagaatttggaattccctacaatccccaaagccaaggagtagtggaatctatgaataaggaattaaagaaaatcatcgg
gcaggtcagggatcaagctgaacaccttaagacagcagtacagatggcagtattcattcacaattttaaaagaaaagggg
ggattggggggtacagtgcaggagaaagaataatagacataatagcaacagacatacaaactaaagaactacaaaaacaa
attacaaaaattcaaaattttcgggtttattacagggacagcagagacccaatttggaaaggaccagcaaaactactctg
gaaaggtgaaggggcagtggtaatacaagacagtaacgaaataaaagtagtaccaaggagaaaggcaaagatcattaggg
attatggaaaacagatggcaggtgatgattgtgtggcaggtagacaggatgaggattagaacatggcacagtttagtaaa
acatcayaagtatatctcaaagaaagctaaaggctggtgttataaacatcactatgagagcactaatccaaggataagct
cagaagtacacataccactaggggaagctaaattgataataaagacatattggggtctgcatacaggagaaagagattgg
catttgggccagggagtctccatagaatggaggaaaaagagatatagcacacaagtagaccctggcctagcagaccaact
aattcatcaatattattttgattgtttttcagaatctgctataagaagtgccatattaggacatagagttagtcctagtt
gtgaatatcaagcaggacataataaggtaggatctctacaatatttggcactgaaagcattagtaacaccaacaaagata
aagccacctttgcctagtgttaggaaattaacagaagatagatggaacaagccccagaggaccaggggccacagagacaa
ccacacaatgaatggacattagaactgttagaggagcttaaaaatgaagctgttagacattttcctaggccctggcttca
tggcttaggagtgcatatctataacacttatggggatacttgggaaggagttgaagccataataagaatactacaacaac
tattgtttacccatttcagaattgggtgccaacatagcagaataggcattagtccacggagaagaggaaggaatggaccc
ggtagatcctaatctagacccctggaatcatccggggagtcagcctaaaactgcttgtaacaagtgctattgtaaaatgt
gttgctggcattgtcaagtttgctttctgaaaaagggcttaggaatctcctatggcaggaagaagcggaagcaccgacga
ggaactcctcaggacagtaaggatcatcaaattcctgtaccaaagcagtaagtattaacaattagtataggtaatgcact
cactagaaatagctgcagtagtaggattaatagtagcaggcatagcagccataattgtgtgggccatagtttttattcta
tataagcaaataagaaaacagaaaaaaatagataggatacttgaaagaataagagaaagagcagaagacagtggaaatga
gagtgaaggggatacagaagaattggcagcgcttgtggacatgggggactttgatcattgggttggggataatttgtagt
gcctcagataacttgtgggtcacagtctattatggggtacctgtgtgggaagatgcatatacccctctattttgtgcatc
ggatgctaaagcatatagtactgagagccataatgtctgggctacacatgcatgtgtacctacagaccccaacccacaag
agatacctctgraaaatgtaacagaaaattttaacatgtggaaaaatcacatggtagaacagatgcatgaggacataatt
agtttatgggatgaaagtctaaagccatgtgtaaagctaacccctctctgtgttactctaaactgtactaaggtagactg
tgagaccagaaattgcactactactaatggcactgtaaacaactctgcagatataaaaaactgctctttcaatataacca
cagagataagggataaaagtaagaaagaatacgcgcttttctataaacttgatataatgccaattgatgataagaataat
ggtagtaataaaaactatagtgactataggctaataaattgtaatgtctcaaccattaaacaggcttgtccaaaggtgtc
ttttgatccaattcccatacattattgtgctccggctggttttgcaattctaaaatgtagggataaggagttcaatggaa
caggaccatgtagaaatgttagtacagtacaatgtacacatggaattaagccagtggtatcaactcaattactgctgaat
ggcagcttagcagaaaaggaaataatgattagatctgaaaacctcacaaacaatgccaaagttataatagtgcagcttaa
tagcagtataacaattaattgtaccagacccaacaacaatacaagaaagagtataacatttggaccaggacaagcattct
atgcaacaggtgacataataggaaatataagagaagcattttgtgtggttaatagaacagcctggaatgagacgatgcag
aaggtaaaagcaaaactagctgaaagctacaacacgagcacagaaaacataacatttggaccaccctcaggaggggacct
agaaattacaacacatagttttatttgtagaggagaatttttctattgtaatacatcaggactgtttaatagcagtaata
ataatagtagtaatatcacactcccatgcaggataaaacagattgtaagaatgtggcagagagtaggacaagcaatgtat
gcccctcccatcgcaggaagcattacatgtgtatcaaacattacaggactaataataacaagagatggtgggcctaacag
tastaatgagaccttcagacttgcaggaggagacatgagagacaattggagaagtgaattatataagtataaagtagtaa
aaattaaaccactaggagtagcacccaccaaggcaaggagaagagtggtggagagaggaaaaagagcagttggactggga
gctgtcttccttgggttcttaggagcagcaggaagcactatgggcgcggcgtcaataacgctgacggtacaggtcaggca
attattgtctggcatagtgcaacagcagagcaatctgctgagggctatagaggcgcagcagcatctgttgcaactcacag
tctggggcattaaacagctccaggcaagagtcctggctctagaaagatacctaaaggaccaacagctcctagggctttgg
ggctgctctggaaaactcatctgcaccactaatgtgccttggaacgctagttggagtaataaaactcttgaagaaatttg
ggacaacatgacttggatacaatgggagagggaaattaacaattacacacaccaaatatacaacctaattgaagaatcgc
agcaacagcaggaaaagaatgaacgagacttattggcattggacaaatgggcaagtctgtggaactggtttgacatatca
aactggctatggtatataaaaatatttataataatagtaggaggcttaataggtttaagaatagttatggctgtgctttc
tataataaatagagttaggcagggatactcacccttgtcattccagacccttacccaccaccagagggaacccgacaggc
ccgaaggaatcgaagaaggaggtggagagcaagacagaggcagatccattcgattagccagcggattcttgccgattgtc
tgggacgacctccggagcctgtgcctcttcagctaccaccgcttgagagacttactcttgattgcagcgaggacattgga
acttctgggacgcagcagtctcaagggactgagactagggtgggagggcctcaaatatctgtggaatctcctgctgtatt
ggggtcaggaactaaagaatagtgctattaatttgcttgatacagtagcaatagcagtagctaacgggacagataggatt
atagaaatagtacaaagaggatttagagcttttctgcacatacctagaagaataagacaaggctttgaaagggcgctgct
ataaaatggggaacaaatggtcaaaaagttgggctgcggtaagggaaagaatgaggcgagcccctccagcagraaaccct
ccagcagcagcaggggtaggagcagtatctcaagatttagctaggcatggagcaattacaagcagcaatacagcagccac
taatgctgatcgtgcctgggtggaagcacaagaagaagattcagaggtaggctttccagtcagaccacaggtacccttga
gaccaatgacctataaggctgcttttgatctcagcttctttttaaaagaaaaggggggactggatgggctaatttggtcc
aagcaaagacaagacatccttgacctgtgggtctataatacacaaggcttcttcccagattggcagaactacacaccagg
gccagggataagatatccactgacctttgggtggtgcttcaaactagtaccagtagatccagcagatgtagaggaagcca
gtaatggagagaacaacagtttattacaccccatctgccagcatggaatggaggacgatgacaaggaagtgctgatgtgg
agatttgacagtagcctagcacggagacacatagcccgagagcggcatccggacttctacaaagactgctgacacagaag
ttgctgacaaggggactttccgcctgggactttccggggaggcgttacctgggaggggctggggagggctaaccctcaga
agcg
