# Supplementary material for: More accurate recombination prediction in HIV-1 using a robust decoding algorithm for HMMs
Source: BMC Bioinformatics. 2011 May 17;12:168. doi: 10.1186/1471-2105-12-168 (PMC3123234; doi:10.1186/1471-2105-12-168)
Supplement: Additional file 1 — Data sets. This file contains sequences and their annotations for the single-breakpoint and short interval data sets. [file 1471-2105-12-168-S1.GZ › datasets/short_100.fas]

>A1.KE.97.ML013_2_AY322185_A2.CY.94.94CY017_41_AF286237
CTTGAGTGCTTCAAGTAGTGTGTGCCCGTCTGTTGTTTGACTCTGGTAACTAGAGATCCCTCAGACCACTCTAGACGGTGTAAAAATCTCTAGCAGTGGCGCCCGAACAGGGACTCGAAAGCGAAAGTTCCAGAGAAGTTCTCTCGACGCAGGACTCGGCTTGCTGAGGTGCACACAGCAAGAAGCGAGAGCGGCGACTGGTGAGTACGCCAAAAATTTTTTGACTAGCGGAGGCTAGAAGGAGAGAGATGGGTGCGAGAGCGTCAGTATTAAGTGGGGGAAAGTTAGATTCGTGGGAAAAAATTCGGTTAAGGCCAGGGGGAAAGAAAAAATATAGACTGAAACATTTAGTATGGGCAAGCAGGGAGCTGGAAAGATTCGCACTTAACCCTAGCCTTTTAGAAACAGCAGAGGGATGTCAACAAGCAATGGAACAATTACAACCAGCTCTCAAGACAGGGACAGAGGAAATTAAATCATTATTTAATACAGTAGCAACCCTCTATTGCGTACATCAAAGGATAGAGGTAAAAGACACCAAGGAAGCTTTAGATAAAATAGAGGAAATACAAAGAAAGAGCAAGCAAAAGACACAACAGGCAGCAGCTGACACAGGAAACAGCAGTCAGGTCAGCCAAAATTACCCTATAGTGCAAAATGCACAAGGGCAAATGATACATCAGTCCTTGTCACCTAGGACTTTGAATGCATGGGTAAAAGTAATAGAAGAAAAGGCTTTCAGCCCAGAAGTAATACCCATGTTCTCAGCATTATCAGAAGGAGCCACCCCACAAGACTTAAATACTATGCTAAACACAGTGGGGGGACATCAAGCAGCTATGCAAATGTTAAAAGATACCATCAATGAGGAAGCTGCAGAATGGGACAGGTTACATCCAGTACATGCAGGGCCTATTCCACCAGGCCAGATGAGAGAACCAAGGGGAAGTGACATAGCAGGAACTACTAGTACCCCTCAAGAACAAATAGGATGGATGACAAGCAACCCACCTATCCCAGTGGGAGACATCTATAAAAGATGGATAATCCTGGGATTAAATAAAATAGTAAGAATGTATAGCCCTGTTAGCATTTTGGATATAAAACAAGGGCCAAAGGAACCCTTCAGAGATTATGTAGATAGGTTCTTTAAAACTCTCAGAGCTGAGCAAGCTACACAGGAGGTAAAAGGTTGGATGACTGAAACATTACTGGTCCAAAATGCAAATCCAGATTGTAAGACCATTTTAAGAGCATTGGGAGCAGGGGCTACATTAGAAGAAATGATGACAGCATGCCAGGGAGTGGGAGGACCTAGCCATAAAGCAAGGATTTTGGCTGAGGCAATGAGCCAAGTACAACAGACAAACATAATGATGCAGAGGGGCAATTTCAGGGGTCAAAAAAGGATTAAGTGTTTCAACTGTGGCAAAGAAGGACACCTAGCCAGAAATTGTAGGGCCCCTAGGAAAAAGGGCTGTTGGAAATGTGGGAAGGAGGGACACCAAATGAAAGAATGCACTGAAAGACAGGCTAATTTTTTAGGGAAAATCTGGCCTCCCAGCAAGGGGAGGCCAGGGAATTTTCCTCAGAGCAGACCGGAGCCAACAGCCCCACCAGCAGAGCTCTTTGGGATGGGGGAAGAGATGACCTCCCCTCCGAAGCAGGAGCAGAAAGACAGGGAACAGGCCCCACCCTTAGTTTCCCTCAAATCACTCTTTGGCAACGACCCGTTGTCACAGTAAAAGTAGGAGGACAGCTAAAAGAAGCTCTATTAGATACAGGAGCAGATGATACAGTATTAGAAGATATAAATTTGCCAGGAAAATGGAAGCCAAGAATGATAGGGGGAATTGGAGGTTTCATCAAAGTAAAACAGTATGATCAGATACTTATAGAAATTTGTGGAAAAAAGGCTATAGGTACAGTATTAGTAGGACCTACACCTGTCAACATAATTGGAAGAAACATGTTGACCCAGATTGGTTGTACTTTAAATTTCCCAATTAGTCCTATTGAGACTGTACCAGTAGAATTAAAGCCAGGAATGGATGGCCCAAAGGTTAAACAATGGCCATTGACAGAAGAAAAAATAAAAGCATTAACAGAAATTTGTACAGAGATGGAAAAGGAAGGAAAAATTTCAAAAATTGGGCCAGAAAATCCATACAATACTCCAATATTTGCAATAAAGAAAAAGGATAGCACTAAATGGAGGAAATTAGTAGATTTCAGAGAGCTCAATAAAAGAACACAAGACTTTTGGGAAGTCCAATTAGGGATACCGCATCCAGCGGGCCTAAAAAAGAAAAAATCAGTAACAGTACTAGATGTGGGGGACGCATATTTTTCAGTTCCTTTACATGAAAGCTTTAGAAAGTATACTGCATTCACCATACCTAGTACAAACAATGAGACACCAGGAATCAGGTATCAGTACAATGTGCTTCCACAGGGATGGAAAGGATCACCAGCAATATTCCAGAGTAGCATGACAAAAATCTTAGAGCCCTTTAGAGCAAAAAATCCAGAAATAATTATCTATCAATACATGGATGACTTGTATGTAGGATCTGATTTAGAAATAGGGCAACATAGAGCAAAAATAGAGGAGTTAAGAGCTCATCTATTGAGCTGGGGATTTACTACACCAGACAAAAAGCATCAGAAAGAACCTCCATTCCTTTGGATGGGATATGAGCTCCATCCTGATAAGTGGACAGTCCAGCCTATAGTGCTGCCAGAAAAAGAACACTGGGCTGTCAATGATATACAGAAATTAGTGGGGAAACTAAATTGGGCAAGTCAAATTTATGCAGGGATTAAAGTAAAGCAATTGTGTAAACTCCTCAGGGGAGCCAAAGCACTAACAGATATAGTAACATTGACTGAGGAAGCAGAATTAGAATTGGCAGAGAACAGGGAGATTCTAAAAGACCCTGTGCATGGGGTATATTATGACCCATCAAAAGACTTAATAGCAGAAATACAGAAACAAGGGCAAGACCAATGGACATATCAAATTTATCAGGAGCCATTTAAGAATTTAAAAACAGGAAAATATGCAAGAAAAAGGTCTGCTCACACTAATGATGTAAGACAATTAGCAGAAGTGGTGCAAAAGGTGGTCATGGAAAGCATAGTAATATGGGGAAAGACTCCTAAATTTAAACTACCCATACAAAAAGAAACATGGGAAACATGGTGGATGGACTATTGGCAGGCTACCTGGATTCCTGAATGGGAGTTTGTCAATACCCCTCCTCTAGTAAAATTGTGGTACCAGTTAGAGAAAGACCCCATAATGGGAGCAGAGACTTTCTATGTAGATGGGGCAGCCAATAGGGAGACTAAGCTAGGAAAAGCAGGGTATGTCACTGATAGGGGAAGACAAAAGGTTGTTTCCCTAACTGAGACAACAAATCAAAAGACTGAACTACATGCAATCTATCTAGCCTTGCAGGATTCAGGATCAGAAGTAAATATAGTAACAGACTCACAGTATGCATTAGGAATCATTCAGGCACAACCAGACAAAAGTGAATCAGAATTAGTTAATCAAATAATAGAGAAGCTAATAGGAAAGGATAAAGTCTACCTGTCATGGGTACCAGCACACAAGGGGATTGGAGGAAATGAACAAGTAGATAAATTAGTCAGCTCTGGAATCAGGAAGATACTATTTTTAGATGGAATAGATAAGGCTCAAGAAGAACATGAAAGATATCACAGCAATTGGAGAGCAATGGCTAGTGATTTTAATCTGCCACCTATACTAGCAAAGGAAATAGTAGCCAGCTGTGATAAATGTCAACTAAAAGGGGAAGCCATACATGGACAAGTGGACTGTAGTCCAGGGATGTGGCAATTAGATTGCACACATCTAGAAGGAAAAGTAATTCTGGTAGCAGTCCATGTAGCCAGTGGCTATATAGAAGCAGAAGTTATCCCAGCAGAAACAGGACAGGAGACAGCATACTTTCTGCTAAAATTAGCAGGAAGATGGCCAGTAAAAGTAGTACACACAGACAATGGCAGCAATTTCACCAGCGCTGCATTTAAAGCAGCCTGTTGGTGGGCAGATGTCCAACAAGAATTTGGGATTCCCTACAATCCCCAAAGTCAAGGAGTAGTGGAATCTATGAATAAGGAACTAAAGAAAATCATAGGGCAGGTAAGAGAGCAAGCTGAACACCTTAAGACAGCAGTACAAATGGCAGTATTCATTCACAATTTTAAAAGAAAAGGGGGGATTGGGGGGTACAGTGCAGGAGAAAGAATAATAGACATAATAGCAACAGACATACAAACTAAAGCATTACAAAAAAACATTACAAAAATTCAAAATTTTCGGGTTTATTACAGGGACAGCAGAGATCCACTTTGGAAAGGACCAGCAAAACTACTCTGGAAAGGTGAAGGGGCAGTAGTAATAAAGGACAATAATGATATAAAGGTAGTACCAAGAAGGAAAGCAAAGATCATTAGGGATTATGGAAAACAGATGGCAGGTGATGATTGTGTGGCAGGTAGACAGGATGAGGATTAGAACCTGGAACAGTTTAGTAAAACATCATATGTATGTCTCAAAGAAAGCAAAAGATTGGTTTTATAGACATCACTTTGAAAGCAGGCATCCAAAAGTAAGTTCGGAAGTACACATCCCACTAGGAGAGGCTAAATTAGTAGTAAGAACATATTGGGGTCTGCATACAGGAGAAAAAGACTGGCACTTGGGTCATGGGGTCTCCATAGAATGGAGGCTAAAAAGATATAGCACACAAATAGATCCTGACCTGGCAGACCAACTAATTCATTTGCATTATTTTAAATGTTTTTCAGACTCTGCCATAAGGAAAGCCATATTAGGACAAGTAGTTAGCCCTAGTTGTGAATATCAAGCAGGACATAACAAGGTAGGATCTCTACAATATTTGGCACTGAAAGCATTAGTAACACCAACAAGGACAAAGCCACCTTTGCCTAGTGTGAAGAAATTAGCAGAGGACAGATGGAACAAGCCCCAGAAGACCAAGGGCCACAGAGGGAGCCATACAATGAATGGACATTAGAACTGTTAGAAGAGCTTAAGCATGAAGCTGTTAGACATTTTCCTAGGCCATGGCTTCATGGATTAGGACAACATATTTATAACACCTATGGGGATACTTGGGAAGGAGTTGAAGCAATAATAAGAATTCTGCAACAACTACTGTTTGTTCATTTCAGAATTGGGTGCTCACATAGCAGAATAGGCATTATTCGAGGGAGAAGAGTCAGAAATGGATCCGGTAGATCATAACCTAGAGCCCTGGAACCACCCGGGAAGTCAGCCTAAAACTGCTTGTAGCCCGTGTTACTGTAAAGTGTGTTGCTATCATTGTCAAGTTTGCTTTCTGAACAAAGGCTTAGGCATCTCCTATGGCAGGAAGAAGCGGAAACAGCGACGAGGAGCTTCTCAAAGCAGTAAGGATCATCAAAATCCTATACCAAAGCAGTAAGTATTAGTAATTAGTATATGTAATGTCTCCTTTGGAAATCTGTGCAATAATAGGACTGATAGTGGCGCTAATCCTAGCAATAGTTGTGTGGACTATAGTAGCTCTAGAATATAGGAAAGTGCTAAAGCAAAGGAAAATAGACAGGTTAATTAAGAGAATAAGGGAAAGAGCAGAAGACAGTGGCAATGAAAGTGATGGGGATACAGATGAATTGGCAAAACTTGTGGAGATGGGGAACTATGATCTTGGGGATGATAATAATCTGTAGTGCTGCAGAAAACTTGTGGGTTACTGTCTACTATGGGGTACCTGTGTGGAAAGATGCAGAGACCACCTTATTTTGTGCATCAGATGCGAAAGGATATGATAAAGAAGTGCATAATGTCTGGGCTACACATGCCTGTGTACCTACAGACCCCAACCCACAAGAAATAGATTTGAAAAATGTGACAGAAGATTTTAACATGTGGGAAAATAACATGGTAGAGCAGATGCATACAGATATAATCAGCCTATGGGACGAAAGCCTAAAACCATGTGTAAAGTTAACCCCTCTCTGCGTTACTTTAAATTGTAGCCATGAGGTCATGGTTGCTGCCAATGCCGATGGCACCACTGCCGGTACCACCACTGCCATTGGAGAGGAAGTAGAGAGCGGTTGCTATACCAGTACGGATCTATGGGATACGAATACGAAGGAGTATGCACTTTCAGATAGACTTGTTCTAGTTCCACTTGCTGAAGAGCTAGAGAAGAGTAGTAGTGGGGGGGATTGTTTAATAAATAGTAGTACTACCTCCATTACACCAGCATGCCCAAAAGTATCCTTTGAGCCAATTCCCATACATTATTGTGCTCCAGCTGGTTTTGCGATCCTAAAGTGTAATGATAAGGAGTTCAATGGAACAGGGCCGTGCCGTAATGTCAGCACAGTCCAATGCACACATGGAATCAAGCCAGTAGTATCAACTCAACTGCTGTTAAATGGCAGTCTAGCAGAAGGAAAGATAATGATTAGATCTGAAAATATCACAGACAATGCCAGAAGCATAATAGTACAACTTGACGAGCCTGTAGTAATTGATTGTACCAGACCTGACAACAATACCAGAACAAGTGTACGTATAGGACCAGGACAAGCATTCTATGCAACAGGTGACATAATAGGGGATATAAGACAAGCATATTGTACTGTCAATGCATCAGAGTGGAATAACACTTTACAACAGGTGAGGGAAGAATTACGAGAATACTTTGTGAACAAAACAATAATATTTGCTAGCTCCTCAGGAGGGGATCCAGAAATCACAACACATATGTTTAATTGTGGAGGAGAATTTTTCTATTGTAACACATCAGGTCTGTTTAATATCACTGACAGAACGGGGCCTGATGGCGATATTGCTCTCCCATGCAGAATAAAGCAAATTATAAAAATGTGGCAAAGAGTGGGACAAGCAATGTTTGCTCCTCCCATCCCAGGAGTAATAAGGTGTGTATCAAACATTACAGGACTATTATTAACAAGGGATGGTGGTAACAATACAATTGAAACCTTCAGACCTGAAGGAGGAGATATGAGGAATAATTGGAGAAGTGAATTATATAAGTATAAGGTGGTAAAAATTGAGCCAATAGGATTAGCACCCACCAAGGCAAGGAGAAGAGTGGTGGAGAGAGAAAAAAGAGGAATAGGAGTTGCCCTCCTTGGGTTCTTAGGAGCAGCTGGAAGCACTATGGGCGCAGCGTCAATAACGCTGACGGTACAGGCCAGAAAATTATTGTCTGGCATAGTGCAACAGCAAAGCAATTTGCTGAGGGCTATAGAGGCTCAACAGCATCTGTTGAGACTCACGGTCTGGGGCATTAAACAGCTCCAGGCAAGAGTCCTGGCTGTGGAAAGATACCTAAAGGATCAACAGCTCCTAGGAATTTGGGGCTGCTCTGGAAAACTCATCTGCACCACTAATGTGCCCTGGAACTCTAGTTGGAGTAATAAATCTCAGAAGGAGATATGGGAAAACATGACCTGGCTGCAATGGGAAAAAGAAATTGACAATTACACAGAGGTAATATATGAGCTACTTGAAGTATCGCAGAACCAGCAGGAAAAGAATGAACAAGACTTATTGGCATTAGACAAGTGGGCAAATCTGTGGAATTGGTTTGGCATAACAAAATGGCTGTGGTATATAAAAATATTTATAATGATAGTAGGAGGCTTAATAGGATTAAGAATAGTTTTTGCTGTGCTTTCTGTAATAAATAGAGTTAGGCAGGGATACTCACCTTTGTCGTTCCAGACCCATACCCCAAACCCAAGGGGTCTCGACAGGCCCGAAAGAATCGAAGAAGAAGGTGGAGAGCAAGACAGAGACAGATCGATTCGCTTAGTGAGCGGATTCTTAGCACTTGCCTGGGACGACCTACGGAGCCTGTGCCTCTTCAGCTACCACCGATTGAGAGACTTAATCTTGATTGCTGCGAGGACTGTGGAACTTCTGGGACACAGCAGTCTCAAGGGGTTGAGACTGGGGTGGAAAGGCCTCAAGTATCTGTGGAATCTCCTGATATATTGGGGACGGGAACTAAAAATTAGTGCTATTAGTTTGCTTGATACCGTAGCAATAGCAGTAGCTGCCTGGACAGATAGGGTTATAGAAGTAGGACAAAGAATTGGTAGAGCTATTCTCCACATACCTATAAGAATCAGACAGGGGCTTGAAAGGGCTTTGCTATAACATGGGGGGCAAGTGGTCAAAAAGTAGTATAGTGGGATGGCCTAAGATTAGGGAAAGAATGAGACGCACTCCTTCAGCAGCAACAGGAGTAGGAGCAGTATCTCAAGATTTAGATAAATATGGAGCAGTTACAAGTAGTAATGTAAATCACCCTAGTTGCGTCTGGCTGGAAGCGCAAGAGGAAGAGGAGGTAGGCTTTCCGGTCAGGCCACAAGTACCTCTAAGACCAATGACTTACAAGGCAGCTCTGGATCTCAGCCACTTTTTAAAAGAAAAGGGGGGACTGGATGGGTTAATTTACTCCAGGAAGAGACAGGAGATCCTTGATCTGTGGGTCTATCACACACAAGGTTACTTCCCTGATTGGCAGAATTACACACCAGGGCCAGGGCCTAGATTCCCACTAACATTTGGATGGTGCTTCAAGCTAGTACCAGTTGATCCAGATGAAGTAGAGAAGGCTAATGAGGGAGAGAACAACAGCCTATTACACCCTATGTGCCAACATGGAATGGATGATGAAGAGAGAGAAACATTAATATGGAAGTTTGACAGCCGCCTGGCCTTCACACACAGAGCCCGAGAGATGCATCCGGAGTACTACAAAGACTGCTGACACAGAAGTTGCTGACAGGGACTTTCCGCTGGGGACTTTCCAGGGGAGGTGTGGTTTGGGCGGAGTTGGGGAGTGGCTAACCCTCAGATGCTGCATATAAGCAGCCGCTTTTCGCCTGTACTGGGTCTCTCTTGGTAGACCAGATTGAGCCTGGGAGCTCTCTGGCTAGCGAGGGAACCCACTGCTTAAGCCTCAATAAAGCTTGCCTTGAGTGCTTCAAGAAA
>A1.KE.00.KER2012_AF457055_B.NL.96.H434_42_A1_AY970948
GCGAGAGCGTCAGTATTAAGTGGGGGAAAATTAGATGCATGGGAGAGAATTCGGTTAAGGCCAGGGGGAAAGAAACAATATAGACTGAAACATCTAGTATGGGCAAGCAGGGAGCTGGACAGATTTGCACTTAACCCTAGCCTTTTAGAAACAACAGAAGGATGTCAACAAATAATAACACAGTTACAACCAGCTATCGGAACAGGAACAGAAGAACTTAAATCATTATATAATACAGTAGCAACCCTCTATTGTGTACATCAGGGGATAAAGGTAAAAGACACCAAGGAAGCTCTAGATAAAATAGAGGAAATACAAAAGAAAAGCAAACAACAGACAGCAGCTGACACAGGAAGCAGCAGCCAAAATTACCCTATAGTGCAAAATGCACAAGGGCAAATGATACACCAGTCCTTGTCACCTAGGACTTTGAATGCATGGGTGAAAGTAATAGAAGAAAAGGCTTTCAGCCCAGAAGTAATACCCATGTTTTCAGCATTATCAGAAGGAGCCACCCCACAAGATTTAAATATGATGCTGAACATAGTGGGGGGACACCAGGCAGCTATGCAAATGTTAAAAGACACCATCAATGAGGAAGCTGCAGAATGGGACAGGCTACATCCAGTACATGCAGGGCCTCCTGCACCAGGCCAGCTGAGAGAACCAAGGGGAAGTGATATAGCAGGAACTACTAGCACCCCTCAAGAACAGATAGGATGGATGACAGGCAACCCACCTATCCCAGTGGGAGACATCTATAAAAGATGGATAATTCTGGGATTAAATAAAATAGTAAGAATGTATAGCCCTGTTAGCATTCTGGATATAAAACAAGGGCCAAAAGAACCCTTCAGAGATTATGTAGATAGGTTCTTTAAAGTTCTCAGAGCTGAGCAAGCTACACAGGAGGTAAAAGGTTGGATGACAGAAACATTATTGATCCAAAATGCAAATCCAGATTGTAAGTCCATTTTAAGAGCATTAGGAGCAGGGGCTACATTAGAAGAAATGATGACAGCATGCCAGGGAGTGGGAGGACCCGGCCATAAAGCAAGGGTCTTGGCAGAGGCAATGAGCCAAGTACAACAAACAAACATAATGATGCAGAGAGGCAATTTTAGGGGCCAAAAAAGGATTAAGTGTTTCAACTGTGGCAAAGAAGGACACCTAGCCAGAAATTGCAGGGCCCCTAGGAAAAAGGGCTGCTGGAAATGTGGGAAGGAGGGACACCAGATGAAAGACTGCACTGAGAGACAGGCCAATTTTTTAGGGAAAATTTGGCCTTCCAGCAAGGGGAGGCCAGGGAATTTTCCTCAGAGCAGGCCAGAGCCAACAGCCCCACCAGCAGAGTTCTTTGGAACGAGGGAAGAGATGACCCCCCCTCCGAAGCAGGAGCAGAAGGACAGGGAACAGAACTCACCTTCAGTTTCCCTCAAATCACTCTTTGGCAACGACCTATTGTCACAGTAAAAATAGGGGGACAGCTAAAAGAAGCTCTACTAGATACAGGAGCAGATGATACAGTATTAGAAGACATAAATTTACCAGGAAAATGGAAACCAAAAATGATAGGGGGAATTGGAGGTTTCATTAAGGTAAAACAGTATGATCAGATAGTTATAGAAATTTGTGGAAAAAAGGCTATAGGTACAGTATTGGTAGGACCTACACCTGTCAACATAATTGGAAGAAATATGTTGACCCAGATTGGCTGTACTTTAAATTTCCCAATTAGTCCTATTAGTACTGTACCGGTAAAACTAAAGCCAGGAATGGATGGCCCAAGGGTTAAACAATGGCCATTGACAGAAGAAAAAATAAAAGCATTAACAGAGATTTGTAAAGAGATGGAAAAGGAAGGAAAAATTTCAAAAATTGGGCCTGAAAATCCATACAATACCCCAATATTTGCTATAAAGAAAAAAGACAGCACTAAATGGAGAAAATTAGTAGATTTCAGAGAGCTCAATAAAAGAACTCAAGACTTTTGGGAAGTTCAATTAGGAATACCGCATCCAGCGGGCTTAAAAAAGAAAAAATCAGTAACAGTACTAGATGTGGGGGACGCATATTTTTCAGTTCCCTTAGATGAAAGCTTTAGAAAGTATACTGCATTCACCATACCTAGTACAAACAATGAGACACCAGGAATCAGGTATCAGTACAATGTGCTTCCACAGGGATGGAAAGGATCACCGGCAATATTTCAGAGTAGCATGACAACAATTTTAGAGCCCTTTAGATCAAAAAATCCAGAAATAATTATCTATCAATACATGGATGACTTATATGTAGGATCTGATTTAGAAATAGGGCAACATAGAGCAAAAATAGAGGAGTTGAGAGCTCATCTATTGAGCTGGGGACTTACTACACCAGACAAAAAGCATCAGAAAGAACCCCCATTTCTTTGGATGGGATATGAACTCCATCCTGACAAGTGGACAGTCCAACCTATACAGCTGCCAGAGAAAGAAAGCTGGACTGTCAATGATATACAGAAATTAGTGGGAAAACTAAATTGGGCAAGCCAAATTTACCCAGGGATTAAAGTAAAACAATTGTGTAGACTCCTCAGGGGAGCCAAAGCACTGACAGATGTAGTAACATTGACTGAGGAAGCAGAATTAGAACTGGCAGAAAACAGGGAGATTCTAAAAGACCCTGTGCATGGAGTATATTATGACCCATCAAAAGACTTGATAGCAGAAATACAGAAACAAGGGCAAGACCAATGGACATATCAAATTTATCAAGAGCCATTTAAAAATTTAAAAACAGGAAAATATGCAAGAAAGAAATCTGCTCATACTAATGATGTAAAACAATTAGCAGAAGTGGTGCAAAAGGTGGTCATGGAAAGCATAGTAATATGGGGAAAGACTCCTAAATTTAAACTACCCATACAAAAGGAAACATGGGAAACATGGTGGATGGATTATTGGCAGGCTACCTGGATTCCTGAATGGGAATTTGTCAATACCCCTCCTCTGGTAAAATTATGGTACCAGTTAGAGAAAGACCCCATAGCAGGAGCAGAAACTTTCTATGTAGATGGGGCAGCCAATAGGGAGACTAAACTAGGGAAGGCAGGGTATGTCACTGACAGAGGAAGACAAAAGGTTGTTCCCCTAACTGAGACAACAAATCAAAAGACTGAATTATATGCAATAGATTTAGCCTTGCAGGATTCAGGATCAGAAGTAAACATAGTAACAGATTCACAGTATGCATTAGGAATCATCCAGGCACAACCAGACAGGAGTGAATCAGAGATAGTCAATCAAATAATAGAGAAGCTAATAGGAAAGGACAAGGTCTACCTGTCATGGGTACCAGCACACAAAGGAATTGGAGGAAATGAACAAGTAGATAAATTAGTCAGTTCTGGAATCAGGAAGGTGCTATTTTTAGATGGAATAGATAAAGCTCAAGAAGAACATGAAAGATATCACAGTAATTGGAGAGCAATGGCTAGTGATTTTAATCTGCCACCTATAGTAGCAAAGGAAATAGTAGCCAGCTGTGATAAATGCCAGCTAAAAGGGGAAGCCATACATGGACAAGTAGACTGCAGTCCAGGGATGTGGCAATTAGATTGCACACATCTAGAAGGAAAAGTAATTCTGGTAGCAGTCCATGTAGCCAGTGGCTATATAGAAGCAGAAGTAATCCCAGCAGAAACAGGACAGGAGACAGCCTACTTTCTACTAAAATTAGCAGGAAGATGGCCAGTAAAAGTAGTACACACAGATAATGGCAGCAATTTTACCAGTGCTGCATTTAAAGCAGCCTGTTGGTGGGCAGGTGTCCAACAGGAATTTGGGATTCCCTACAATCCCCAAAGTCAAGGAGTAGTGGAATCTATGAATAGAGAATTAAAGAAAATCATAGGACAAGTAAGGGAGCAGGCTGAACACCTTAAGACAGCAGTACAAATGGCAGTATTCATTCACAATTTTAAAAGAAAAGGGGGGATTGGGGGGTACAGTGCAGGGGAAAGAATAATAGACATAATAGCAACAGACATACAAACTAAAGAATTACAAAAACAAATTACAAAAATTCAAAAATTTCGGGTTTATTACAGGGACAGCAGAGATCCAATTTGGAAAGGACCAGCAAAACTACTCTGGAAAGGTGAAGGGGCAGTGGTGATACAGGACAATAGTGATATAAAGGTAGTACCAAGAAGAAAAGCAAAGATCATTAGGGATTATGGAAAACAGGTGGCAGGTGATGATTGTGTGGCAGGTAGACAGGATGAGGATTAGAACATGGAACAGTTTAGTAAAATACCATATGTATGTCTCAAAGGAAGCTAAAGGTTGGTTTTATAGACATCACTATGAAAGTAGTCATCCAAAAGTAAGTTCAGAAGTACACATCCCACTAGGGGATGCTAAAATAGTAGTAAGAACATATTGGGGTCTGCATACAGGAGAAAAAGATTGGCACTTGGGTCATGGGGTCTCCATAGAATGGAGGCTAAAAAGATATAGCACACAAATAGATCCTGACGTGGCAGACCAACTAATTCATCAACATTATTTTGCCTGTTTTTCAGACTCTGCCATAAGGAGAGCCATATTAGGGCATGTAGTTAGCCCTAGGTGTGAATATCAAACAGGACATAACAAGGTAGGATCTCTACAATATTTAGCACTGAAAGCATTAGTAAAACCAACAAGGAGAAAGCCACCTTTGCCTAGTGTTAGGAAATTAACAGAGGATAGATGGAACAAGCCCCGGAAGACCAGGGGCCACAGAGGGAGCCATACAATGAATGGATGTTAGAGCTGTTAGAAGATCTTAAGCATGAAGCTGTAAGGCATTTTCCTAGGCCATGGCTTCATGGATTAGGACAACATATCTATAACACCTATGGGGACACTTGGGAAGGAGTTGAGGCTATAATAAGAATCTTGCAACAACTACTGTTTGTTCATTTCAGAATTGGGTGCCAACACAGCAGAATAGGCATTATTCGAGGGAGAAGAGCCAGGGATGGATCCGGTAGATCATAAACTAGAGCCCTGGAACCATCCGGGAAGTCAGCCTACAACTCCTTGTAGCAAATGCTACTGTAAAAAATGTTGCTATCATTGCATAGTTTGCTTTCAGACCAAAGGCTTAGGCATCTCCTATGGCAGGAAGAAGCGGAGACAGCGACGAGGAGCTTCTCAAAGCAGTAAGGATCATCAAAATCCTGTACCAAAGCAGTAAGTAGTAGTAATTAACATATGTAATGTCTCCTTTGGAAGTTTGGGCAATAGTAGGACTCGTAGTAGCGCTAATACTAGCAATAGTTGTGTGGACTATAGTAGGTATAGAATATAGAAAAGTGTTAAAGCAAAGAAAAATAGACAGGTTAATTGAGAGAATAACAGAAAGAGCAGAAGACAGTGGCAATGAGAGTGATGGGGATACAGAGGAATTGTCAGCACTTGTTGAGATGGGGAATTATAATCTTGGGTATGATAATGATCTGTAGTATGGCACAAAACTTGTGGGTTACTGTCTATTATGGGGTACCTGTGTGGAGAGATGCAGACACCACCCTATTTTGTGCATCAGATGCTAAAGCATATAAGACAGAAGTGCATAATGTCTGGGCTACACATGCCTGTGTGCCCACAGACCCCAACCCACAAGAAATATATTTGACAAATGTGACAGAAAATTTTAACATGTGGAAAAATAAAATGGTAGAGCAGATGCATGAAGACATAATTAGTCTATGGGACCAAAGCCTAAAGCCATGTGTACAGTTAACCCCTCTCTGCGTTACGTTAAACTGTAGCGATGTCACGAATAACACCCTCAGGAATGCCACTGTGAATGCCAATGCCAATGCCACTGTCACTGGGGACATGGAAGGAGAAATGAAAAACTGCTCTTACAATATGACCACAGCAGTAAGGGATAAGCAAAAGAAAGTATACTCACTTTTTTATAGGCTAGATGTAGTGCAAATTAGCAATAATAGTAGCAGTAGTAGTGAGTATAGATTAATAAATTGTAATACCTCAGCCATTACACAAGCTTGTCCAAAAGTAACCTTTGAGCCAATTCCCATACATTATTGTGCCCCAGCTGGTTTTGCGATCCTAAAGTGTAATGAAGAAGGGTTCAATGGAACAGGACCATGCAAAAATGTCAGCACAGTACAATGCACACATGGAATCAAGCCAGTAGTATCAACTCAACTGCTGTTAAATGGCAGTCTAGCAGAAAAAGGGGTAATAATCAGATCTGAAAACATCTCAAACAATGCTAAAACCATAATAGTACAACTTGCCGAGCCTGTAACAATTAATTGTACCAGACCTAACAACAATACAAGAAAAGGTATACATATAGGACCAGGACGAGCATTCTATGCAACAGGTGACATAATAGGGGATATAAGAAAAGCATATTGTAATGTCAGTAGAACACAATGGAATAAAACTTTGGCACAGGTAGCTGCACAATTAACAAAATATTGGAACAAAACAATAAACTTTACTAGCTCCTCAGGAGGGGATGTAGAAATTACAACACATAGTTTTAATTGTGGGGGAGAATTTTTCTATTGTAATACAACAAACCTGTTTAATAGCACCTGGAGAGGAAATAAAACTGTCAGCAATAGCACAGAGTTAGATGAAAATGGCACTATAACTCTCCCATGCAGAATAAAGCAAATTATAAATATGTGGCAGAGAACAGGACAAGCAATGTATGCCCCTCCCATCCAAGGAGTAATAAAGTGTGTATCAAACATTACAGGACTACTATTAACAAGAGATGGTGGAACCACCAAACCCAATGTCGAGGTCTTCAGACCTGGAGGAGGAGATATGAGGGACAATTGGAGAAGTGAATTATATAAATATAAAGTAGTAAGAATTGAACCACTAGGAGTAGCACCCAACAAGGCAAGGAGAAGAGTGGTGGAGAGAGAAAAAAGAGCAGTTGGACTGGGAGCTGTATTCATTGGGTTCTTAGGAGCAGCAGGAAGCACTATGGGCGCGGCGTCAATAACGCTGACGGCACAGGCCAGACAATTATTGTCTGGCATAGTGCAACAGCAAAGCAATTTGCTGAAGGCTATAGAGGCTCAACAGCATCTGTTGAAACTCACGGTCTGGGGCATTAAACAGCTCCAGGCAAGAGTCCTGGCTCTGGAAAGATACCTAAAGGATCAACAGCTCCTAGGAATTTGGGGCTGCTCTGGAAAACTCATCTGCACCACTAGTGTGCCCTGGAACTCTAGTTGGAGTAATAAATCTTTTGAGCAAATATGGAATAACATGACCTGGTTGGAATGGGATAAAGAAGTTAGCAATTACACACAAATAATATATGAGCTACTTGAAGTATCGCAGAACCAGCAAGAAAAGAATGAACAAGACTTATTGTCATTGGACAAATGGGCAAGTCTGTGGAATTGGTTTGACATATCAAAATGGCTGTGGTATATAAAAATATTTATAATGATAGTAGGAGGCTTAATAGGCTTAAGAATAGTTTTTGCTGTGCTTTCTATAATAAATAGAGTTAGGCAGGGATACTCACCTTTGTCATTTCAGACCCTTACCCCAAACCCAGGGGGACTCGACAGGCCCGGAAGAATCGAAGAAGAAGGTGGAGAGCAAGGCAGAGACAGATCGATTCGATTAGTGAGCGGATTCTTAGCACTTGCCTGGGACGATCTGAGGAACCTGTGCCTTTTCAGCTACCACCGCTTGAGAGACTTCATCTTGATTGCCGCGAGGACTGTGGAACTTCTGGGACACAGCAGTCTCAAGGGGTTGAGACTGGGGTGGGAAGGGATCAAGTATCTGGGGAATCTCCTGTTGTATTGGGGTCGGGAACTGAAAAATAGTGCTATTAATTTGTTAGATACTATAGCAATAGCAGTAGCTGGCTGGACAGATAGGGTTATAGAAATAGGACAAAGAATTGGTAGAGCTATTCTCAACATACCTAGAAGAATCAGACAGGGCGCTGAAAGAATCTTAGTATAACATGGGTGGCAAGTGGTCAAAAAGTAGCATAGTGGGATGGCCTGAGGTTAGGAAAAGAATACAACAAACTCCTCCAGCAGCAAGAGGAGTAGGAGCAGTATCTCAAGATTTAGAAAAACATGGTGCAATCACAAGCAGTAATATAAATCATCCTAGTTGCACGTGGCTGGAAGCACAAGAAGAAGATGAGGAGGTAGGCTTTCCAGTCAGGCCACAAGTACCTTTAAGACCAATGACTTACAAGGGAGCTGTGGATCTCAGCCACTTTTTAAAAGAACAGGGGGGACTGGATGGGTTAGTTTGGTCCAGGAAAAGACAAGAAATCCTTGATCTGTGGGTCTACAACACACAGGGCTACTTCCCTGACTGGCAGAATTACACACCAGGGCCAGGGATCAGATTCCCACTAACATTTGGATGGTGCTTCAAGCTAGTACCAGTTGATCCAGATGAAGTAGAGAAGGCTAATGAAGGAGAGAACAACAGCCTGTTACATCCCATATGCCAACATGGAATGGATGACGAGGAGAAAGAAACATTAATATGGAGGTTTGACAGCCGCCTAGCACTGAAACACAGAGCCCAAGAGATACATCCGGAGTTCTACAAAGACTGCTGACACAGAACACTGGGGACTTTCCAGGGGAGGTGTGGTTTGGGCGGAGTTGGGGAGTGGCTAACCCTCAGATGCTGCATATAAGCAGCTGCTTTTCGCCTGTACTGGGTCTCTCTTGTTAGACCAGATCGAGCCTGGGAGCTCTCTGGCTAGCTAGGGAACCCACTGCT
>A1.UG.92.92UG_029_AY713407_C.BW.99.99BWMC168_AF443087
GCGAGAGCGTCAGTATTAAGCGGGGGAAAATTAGATGCATGGGAGAAAATTCGGTTAAGGCCAGGGGGAAAGAAAAAATATAGACTAAAACATCTAGTATGGGCAAGCAGGGAGCTGGAAAGATTCGCACTTAACCCTAGCCTTTTAGAAACAACAGAAGGATGTCAACAAATAATAGAACAGTTACAACCAGCTCTCAAGACAGGAACAGAAGAACTTAGATCATTATATAATACAGTAGCAACCCTCTATTGCGTACATCAAAGGATAGATGTAAAAGACACCAAGGAAGCTTTAGATAAAGTAGAGGAAATACAAAATAAAAGCAAACAAAAGACACAACAGGCAGCAGCTGGCACAGGAAACAGCAGCAAAGTCAGCCAAAATTACCCTATAGTGCAAAATGCACAAGGGCAAATGGTATACCAGGCAGTAACACCTAGGACTTTGAATGCATGGGTGAAAGTAATAGAGGAAAGGGCTTTCAGCCCAGAAGTAATACCCATGTTCTCAGCATTGTCAGAAGGAGCCACCCCACAAGATTTGAATATGATGCTGAACATAGTGGGGGGACACCAGGCAGCTATGCAAATGTTAAAAGATACCATTAATGAGGAAGCTGCAGAATGGGACAGGTTACATCCAGCACAGGCAGGGCCTGTTGCACCAGGCCAACTGAGAGACCCAAGGGGAAGTGATATAGCAGGGACTACTAGTACCCCTCAAGAACAAATAGGATGGATGACAGGCAACCCACCTATCCCAGTGGGAGACATCTATAAAAGATGGATAATCCTGGGATTAAATAAAATAGTAAGAATGTATAGCCCTGTTAGCATTTTGGATATAAGACAAGGGCCAAAAGAGCCCTTCAGAGATTATGTAGATAGGTTCTTTAAAACTCTCAGAGCTGAGCAAGCTTCACAGGAGGTAAAAGGTTGGATGACAGAAACATTACTGGTCCAAAATGCAAATCCAGATTGTAAGTCCATTCTAAAAGCATTAGGAACAGGGGCTACATTAGAAGAAATGATGACAGCATGCCAGGGAGTGGGAGGACCCAGCCATAAAGCAAGGATTTTGGCTGAGGCAATGAGTCAAGCACAACATACAAACATAATGATGCAGAGAGGTAATTTTAGAGGCCAGAAAAGGATTAAGTGTTTCAACTGTGGCAAAGAAGGACACCTAGCCAAACATTGCAGGGCCCCTAGGAAAAAGGGCTGTTGGAAATGTGGGAAGGAGGGACACCAAATGAAAGACTGCACTGAAAGACAGGCTAATTTTTTAGGGAAAATTTGGCCTTCCAGCAAGGGGAGGCCAGGAAATTTTCCACAGAGCAGACCGGAGCCAACAGCCCCACCAGCGGAGCTCTTTGGGATGGGGGGAGAGATATCCTTCCCTCCGAAGCAGGAGCAGAAAGACAGGGACCAGGCCTCACCTTTAGTTTCCCTCAAATCACTCTTTGGCAACGACCCCTTGTCACAGTAAAAATAGGGGGACAGCTAAAAGAAGCTCTATTAGATACAGGAGCAGATGATACAGTATTTGAAGACATAAATTTGCCAGGAAAATGGAAACCAAGAATGATAGGGGGAATTGGAGGTTTCATCAAAGTAAAACAGCATGATCAGATACTTATAGAAATTTGTGGAAAAAAGGCTATAGGTACAGTGTTGGTAGGACCTACACCTGTCAACATAATTGGAAGAAATATGTTGACCCAGATTGGTTGTACTTTAAATTTCCCAATTAGTCCTATTGATACTGTACCAGTAAAATTAAAGCCAGGAATGGATGGCCCAAAGGTTAAACAATGGCCATTGACAGAAGAAAAAATAAAAGCATTAACAGAAATTTGTACAGATATGGAAAAGGAAGGAAAAATTTCAAGAATTGGGCCTGAAAATCCATACAATACTCCAATATTTGCTATAAAGAAAAAAGACAGCACTAAATGGAGAAAATTAGTAGATTTCAGAGAGCTCAATAAAAGAACTCAAGACTTTTGGGAAGTTCAATTAGGAATACCGCACCCAGCGGGCTTAAAAAAGAAAAAATCAGTAACAGTACTAGATGTGGGGGACGCATATTTTTCAGTTCCCTTAGATGAAAGCTTTAGAAAGTATACTGCATTCACCATACCTAGTACCAACAATGAGACACCAGGAATCAGGTATCAGTACAATGTGCTTCCACAGGGATGGAAAGGATCACCAGCAATATTCCAGAGTAGCATGACAAAAATTTTAGAGCCCTTCAGATCAAAAAATCCAGAAATAATTATCTATCAGTACATGGATGACTTGTATGTAGGATCTGATTTAGAAATAGGGAAGCATAGAGCAAAAATAGAAGAGCTGAGAGCTCATCTATTGAGCTGGGGGTTTACTACACCAGACAAAAAGCATCAGAAAGAACCTCCATTTCTTTGGATGGGATATGAACTCCATCCTGACAAGTGGACAGTCCAGCCAATAGAGCTGCCAGCAAAAGAAAGCTGGACTGTCAATGATATACAGAAATTAGTGGGAAAACTAAATTGGGCAAGTCAAATTTATGCAGGAATTCAAGTAAAACAATTGTGTAAACTCCTCAGGGGAGCCAAAGCACTAACAGATATAGTAACGTTGACTGAGGAAGCAGAATTAGAATTGGCAGAGAACAGGGAAATTCTAAAAGACCCTGTGCATGGAGTATATTATGACCCATCTAAAGACTTAATAGCAGAAATACAGAAACAAGGGCAAGACCAATGGACATATCAAATTTATCAAGAGCCATTTAAAAATCTGAAAACAGGAAAATATGCAAGAAAGAGGTCTGCTCACACAAATGATGTAAAACAATTAGCAGAAGTGGTGCAAAAGGTGACCATGGAAAGCATAGTAATATGGGGAAAGACTCCTAAATTTAAACTACCCATACAGAAAGAAACATGGGAAACATGGTGGAGGGACTATTGGCAGGCTACCTGGATTCCTGAATGGGAGTTTGTCAATACCCCTCCCCTAGTAAAATTATGGTACCAGCTAGAGAAAGACCCTATAGTAGGAGCAGAAACTTTCTATGTAGATGGGGCAGCTAATAGGGAAACTAAGCAGGGAAAAGCAGGGTACGTCACTGACAGAGGAAGACAAAAAGTTGTTTCCCTAAATGAGACAACAAATCAAAAAACTGAATTACATGCTATCTATCTAGCCTTGCAAGATTCAGGATCAGAAGTAAATATAGTAACAGACTCACAGTATGCATTAGGAATCATTCAGGCACAACCAGACAGGAGTGAATCAGGGTTAGTCAGTCAAATAATAGAGAAGCTAATAGAAAAAGACAAAGTCTACCTATCATGGGTACCAGCACACAAGGGAATCGGAGGAAATGAACAAGTAGATAAATTAGTCAGTTCAGGAATCAGGAAGGTGCTATTTTTAGATGGGATAGATAAGGCTCAAGAAGAACATGAGAGATATCACAGCAATTGGAGAGCAATGGCTAGTGATTTTAATCTGCCACCTGTAATAGCAAAGGAAATAGTGGCCAGCTGTGATAAATGTCAACTAAAAGGAGAAGCCATGCATGGACAAGTAGACTGTAGCCCAGGAATATGGCAATTAGATTGCACACATCTAGAAGGAAAAGTAATCCTGGTAGCAGTCCATGTGGCCAGTGGTTATATAGAAGCAGAAGTTATCCCAGCAGAAACAGGACAGGAGACAGCATACTTTCTGCTAAAATTAGCAGGAAGATGGCCAGTAAAAGTAGTGCACACAGACAATGGCCCCAATTTCACCAGCGCTACAGTTAAAGCAGCTTGCTGGTGGGCAAATATCCAACAGGAATTTGGAATTCCCTACAATCCCCAAAGTCAAGGAGTAGTGGAATCTATGAATAAGGAATTAAAGAAAATCATAGGGCAGGTAAGAGACCAAGCTGAACACCTTAAGACAGCAGTACAAATGGCAGTATTCATTCACAATTTTAAAAGAAAAGGGGGGATTGGGGGGTACAGTGCAGGGGAAAGAATAATAGACATAATAGCAACAGACATACAAACTAAAGAATTACAAAAACAAATTACAAAAATTCAAAAATTTCGGGTCTATTACAGGGACAGCAGAGATCCAATTTGGAAAGGACCAGCAAAACTACTCTGGAAAGGTGAAGGGGCGGTAGTAATACAAGACAACAGTGATATAAAGGTAGTGCCAAGAAGAAAAGCAAAGATCATTAGGGATTATGGAAAACAGATGGCAGGTGATGATTGTGTGGCAGGTAGACAGGATGAGGATTAAAACATGGAACAGTTTAGTAAAACATCATATGTATATCTCAAAGAAAGCTACTGGTTGGTGTTATAGACATCACTATGAAAGCAGACATCCAAAAGTAAGTTCAGAAGTACACATCCCACTAGGGGAAGCTAAAATAGTAGTAAGAACATATTGGGGGCTGCATACAGGAGAAAAAGACTGGCACTTGGGTCATGGGGTCTCCATAGAATGGAGGCTAAAAGGTTATAACACACAATTAGATCCTGACCTGGCAGACCGACTAATTCATCTGCATTATTTTGACTGTTTTTCAGAATCTGCCATAAGGAAAGCCATATTAGGACAAGTAGTTAGCCCTAGTTGTGAATATCAAACAGGACACAACAAGGTAGGATCTCTACAATATTTAGCACTGAAAGCATTAGTAACACCAACAAGAATAAAGCCACCTCTGCCAAGGTTAAGAAATTAGCAGAGGATAGATGGAACAAGCCCCAGAAGACCAGGGGCCCCAGAGAGAGCCATACAATGAATGGATGTTAGAACTGTTAGAAGATCTTAAACATGAAGCTGTTAGGCATTTTCCTAGGCCATGGCTCCATGGATTAGGACAACATATCTATAACACCTATGGGGATACTTGGGAAGGAGTTGAAGCTATAACAAGAATTTTGCAACAACTACTGTTTGTTCATTTCAGAATTGGGTGCCAACATAGCAGAATAGGCATCATTCGAGGGAGAAGAGGCAGGGATGGAGCTGGTAGATCCTAACCTAGAGCCCTGGAACCATCCGGGAAGCCAGCCTACAACTCCTTGTAGCAAGTGTTATTGTAAAAAGTGTTGCTATCATTGCCCAGCTTGCTTTCTACACAAAGGCTTAGGCATCTCCTATGGCAGGAAGAAGCGGAAACAGCGACGAAGATCTCCTCAAAGCAGTAAGGATCATCAACATCCTGTACAAAAGCAGTGAGTATTAGTAATTAGTATATGTAATGACTCCTTGGGAAATCTGTGCAATAGTAGGACTGGTAGTGGCGCTAATCATAGCAATAGTTGTGTGGACTATAGTAGGCATAGAGTATAGGAAATTGCTAAGGCAAAGAAAAATAGACAGATTAATTGAGAGAATAAGAGAAAGAGCAGAAGACAGTGGCAATGAGAGTGATGGAGAGACAGAGGAATTATCCAAACTTATGGAGCTGGGGGACTATGATCTTGGGAATGATAATAATTTATAGTGCTGCAGAAAACTTGTGGGTTACTGTCTACTATGGGGTACCTGTGTGGAGAGATGCAGACACCACCTTATTTTGTGCATCAGATGCTAAAGCATATGACACAGAAGTGCATAATGTCTGGGCTACACATGCCTGTGTGCCCACAGACCCCAACCCACAAGAAATAAATTTGGAAAATGTGACAGAAGATTTTAACATGTGGAAAAATAACATGGTAGAGCAGATGCATACAGACATAATCAGTCTATGGGACCAAAGCCTAAAGCCATGTGTAAGTTTAACCCCTCTCTGTGTTACTTTAAATTGTACCGATGTGAAGAACAGCACGGGTAGAGACAACATAACGGGAATTAGTATGGCAGGAGAAATAAAAAACTGCTCTTTCAATATGACCACAGAATTAAGGAATAAGAGACAGCAAGCACATTCACTTTTTTATAAACTTGATGTAGTACAAATGGATGGAAATAATGGTAGTCTGTATAGATTAATAAAGTGTAATACTTCAGCCATTACACAAGCTTGTCCAAAGGTATCCTTTGAACCAATTCCCATACATTATTGTGCCCCAGCTGGTTTTGCGATCCTAAAGTGTAAGGATGAGGAGTTCAATGGAACAGGGCCATGCAAGAATGTCAGCACAGTACAATGCACACATGGAATCAGGCCAGTAGTATCAACTCAATTGCTGTTAAATGGCAGTCTAGCAGAAAAAGATATAATCATTAGATCTAAAAATCTGACAGATAATGCCAAAACAATAATAGTACATCTTAATGAGTCTGTAAATATTACATGTACAAGACCCAACAATAATATAAGCAGAAGAAGGATACATATAGGAAGAGGACAAGCATTCTATGCAACAGGTGGCATGACAGGGAATATAAGACAAGCATATTGTAATGTCAGTAGATCAGATTGGAATACAACTTTACAACAGGTAGTTACACAGTTAAGAAGACACTGGCAGAACACAACAATAGTCTTTAAAAGCTCCTCAGGAGGGGATGTAGAAATTACAACACATAGTTTTAATTGTGGAGGGGAGTTTTTCTATTGTAATACATCAGGCCTGTTTAATAGCACTTGGCCTTGGAATGAGACAAATAGCGAGACAAATAACACGAACGCTACTATAGTGCTCCCATGCAGAATAAAACAAATTGTAAGGATGTGGCAGAGAGTAGGACAAGCAATGTATGCCCCTCCCATCCAAGGAGAAATAAAGTGTACATCAAACATCACAGGACTACTATTAGTAAGAGATGGTGGGGTTGGTAACAATACAAATGGAACTGAAACCTTCAGACCTGGAGGAGGAAATATGAGGGACAATTGGAGAAGTGAATTATATAAGTATAAAGTAGTAAAAATTGAACCACTAGGAGTAGCACCCACCGGGGCAAAAAGAAGAGTGGTAGAGAGAGAAAAAAGAGCAGTTGGAATAGGAGCTGTGTTCATTGGGTTCTTAGGAGCAGCTGGAAGCACTATGGGCGCGGCATCAGTAACGCTGACGGTACAGGCCAGACAATTGTTGTCTGGCATAGTGCAACAGCAAAGCAATTTGCTGAGGGCTATAGAGGCTCAACAGCATATGTTGAAACTCACGGTCTGGGGCATTAAACAGCTCCAGGCAAGAGTCCTGGCTGTGGAAAGATACCTAAAGGACCAACAGCTCCTAGGAATTTGGGGCTGCTCTGGAAAACTCATCTGCACCACCAATGTGCCCTGGAACTCCAGTTGGAGTAATAGAACTCAGAGTGAGATATGGGATAACATGACCTGGCTGCAATGGGATAAAGAAATTAACAATTACACATACACAATCTATAGGCTACTTGAAGAATCGCAAAACCAGCAGGAAAAGAATGAACGAGACTTATTGGCATTGGACAAGTGGGCAAATCTGTGGAATTGGTTTGACATATCAAGATGGCTGTGGTATATAAGAATATTTATCATGATAGTAGGAGGCTTAATAGGATTAAGAATAGTTTTTGCTGTGCTTTCTATAATAAATAGAGTTAGGCAGGGATACTCACCTTTGTCATTTCAGATCCATGCCCCAAACCCAGAGGGTCTCGACAGGCCAGGAAGAATCGAAGAAGAAGGTGGAGAGCAAGGCAGAAACAGATCGATTCGCTTAGCGAGCGGATTCTTAACACTTGCCTGGGAAGATCTGAGGAGCCTGTGCATCTTCAGCTACCACCGCTTGAGGGACTTCATCTTGATTGTCGCAAGGACTGTGGAACTTCTGGGACACAGCAGTCTCAAGGGGTTGAGACTGGGGTGGGAGGGCCTCAAGTATCTGTGGAATCTTCTGCAATACTGGGGTCGGGAACTAAAAACTAGTGCTATTAGTTTGCTTGATGCTACAGCAATAACAGTAGCTGGCTGGACAGATAGGGTTATAGAAATAGGACAGAGGCTTTGTAGAGCTATTCGCAACATACCTAGAAGAATTAGACAGGGCTTCGAAAGGGCTTTGCTATAACATGGGTAGCAAGTGGTCAAAAAGTAGCATAGTGGGCTGGCCTGAGGTTAGGGAAAGAATGAGACGAACTCCTAGGGAAAGAAGGAGACAAACTCCTACAGCAGCAGAAGGAGTAGGAGCAGCAGCAGCAGAAGGAGTAGGAGCAGTATCTAAAGATTTAGAAAAATTTGGAGCAATTACCAGCAGTAATGTAAATCACCCCAGTTGCGCCTGGGTGGAAGCGCAAACGGAAGA
>A1.UG.85.U455_M62320_D.UG.99.99UGA07412_AF484477
AAGCTTGCCTTGAGTGCTTGAAGTAGTGTGTGCCCGTCTGTTATTTGACTCTGGTAACTAGAGATCCCTCAGACCACTATAGACTGTGTAAAAATCTCTAGCAGTGGCGCCCGAACAGGGACTCGAAAGCGAAAGTTCCAGAGAAGTTCTCTCGACGCAGGACTCGGCTTGCTGAGGTGCACACAGCAAGAGGCGAGAGCGGCGACTGGTGAGTACGCCTAAAATTTTTTGACTAGCGGAGGCTAGAAGGAGAGAAATGGGTGCGAGAGCGTCAGTATTAAGCGGGAAAAAATTAGATTCATGGGAGAAAATTCGGTTAAGGCCAGGGGGAAACAAAAAATATAGACTGAAACATTTAGTATGGGCAAGCAGGGAGCTGGAAAAATTCACACTTAACCCTGGCCTTTTAGAAACAGCAGAAGGATGTCAGCAAATACTGGGACAATTACAACCAGCTCTCCAGACAGGAACAGAAGAACTTAGATCATTATATAATACAGTAGCAGTCCTCTATTGTGTACATCAAAGGATAGATGTAAAAGACACCAAGGAAGCTTTAAATAAAATAGAGGAAATGCAAAATAAGAACAAGCAAAGGACACAGCAGGCAGCAGCTAACACAGGAAGCAGTCAAAATTACCCCATAGTGCAAAATGCACAAGGGCAACCAGTACACCAGGCCTTATCACCTAGGACCTTGAATGCATGGGTGAAAGTAGTAGAAGACAAGGCTTTCAGCCCAGAAGTAATACCCATGTTTTCAGCATTATCAGAGGGAGCCACCCCACAAGATTTAAATATGATGCTGAATGTAGTGGGGGGACACCAGGCAGCTATGCAAATGTTAAAAGATACCATCAATGAGGAAGCTGCAGAGTGGGACAGGTTACATCCAGTGCATGCAGGGCCTATTCCACCAGGCCAGATGAGAGAACCAAGGGGAAGTGACATAGCAGGAACTACTAGCACCGTTCAAGAACAAATAGGATGGATGACAGGCAATCCACCTATCCCAGTGGGAGACATCTATAGAAGATGGATAATCCTGGGATTAAATAAAATAGTAAGAATGTATAGCCCTGTTAGCATTTTGGACATAAGACAAGGGCCAAAAGAACCCTTCAGGGATTATGTAGATAGATTCTTTAAAACTCTCAGAGCTGAGCAAGCTACACAGGATGTAAAAAACTGGATGACAGAAACCTTGCTGGTCCAAAATGCGAATCCAGACTGTAAGTCCATTTTAAGAGCATTAGGGCCAGGGGCTACATTAGAAGAAATGATGACAGCATGCCAGGGAGTGGGAGGACCCGGCCATAAAGCAAGGGTTTTGGCTGAGGCAATGAGTCAAGTACAACAGACAAGCATAATGATGCAGAGAGGCAATTTTAGGGGCCCGAGAAGAATTAAGTGTTTCAACTGTGGCAAAGAAGGACACCTAGCCAAAAATTGTAGGGCCCCTAGGAAAAAGGGCTGTTGGAAATGCGGGAAAGAAGGACACCAAATGAAAGACTGCACTGAGAGACAGGCTAATTTTTTAGGGAAAATTTGGCCTTCCAACAAGGGGAGGCCAGGGAATTTTCCTCAGAGCAGACCAGAGCCAACAGCCCCACCAGCAGAAATCTTTGGGATGGGGGAAAAGATGACCTCCCCTGCGAAACAGGAGCTGAAAGACAGGGAACAGACTCCTTTAGTTTCCCTCAAATCACTCTTTGGCAACGACCCCTTGTCACAGTAAAAATAGGAGGACAGCTGATAGAAGCTCTATTAGATACAGGAGCAGATGATACAGTCTTAGAAGACATAAATTTGCCAGGAAAATGGAAACCAAAAATAATAGGGGGAATTGGAGGTTTTATCAAAGTAAGACAGTATGATCAGATACTTATAGAAATTTGTGGAAAAAAGACTATAGGTACAGTATTGGTAGGACCTACACCTGTCAACATAATTGGAAGGAATATGTTGACTCAGATTGGTTGTACTTTAAATTTTCCAATTAGTCCTATTGAAACTGTACCAGTAAAATTAAAACCAGAAATGGATGGCCCAAAGGTTAAACAATGGCCATTGACAGAAGAGAAAATAAAAGCATTAACAGAAATTTGTAATGAGATGGAAAAGGAAGGAAAAATTTCAAAAATTGGGCCTGAAAATCCATACAATACTCCAGTATTTGCTATAAAGAAAAAGGACAGCACTAAATGGAGGAAATTAGTAGATTTCAGAGAACTCAATAAAAGAACTCAGGACTTCTGGGAAGTTCAATTAGGAATCCCGCATACAGCGGGTCTAAAAAAGAAAAAATCAGTAACAGTACTAGATGTGGGGGACGCATATTTTTCAGTTCCTTTAGATGAAAGCTTTAGAAAGTATACTGCGTTCACCATACCTAGTATAAACAATGAGACACCAGGAGTCAGGTATCAGTACAATGTGCTTCCGCAGGGATGGAAAGGATCACCATCAATATTCCAGAGTAGCATGACAAAAATCTTAGAGCCCTTTAGATCACAACATCCAGACATAGTTATCTATCAATACATGGATGACTTGTATGTGGGATCTGATTTAGAAATAGGGCAACATAGAGCAAAAATAGAGGAATTAAGAGCTCATCTATTGAGCTGGGGATTCATTACCCCAGACAAAAAGCATCAGAAAGAACCTCCATTTCTTTGGATGGGGTATGAACTTCATCCTGACAAATGGACAGTTCAGCCTATACAGCTGCCAGAAAAAGACAGCTGGACTGTCAATGATATACAGAAATTAGTAGGAAAACTAAATTGGGCAAGTCAGATTTATGCAGGGATTAAAGTAAAGCAACTGTGTAAACTTCTCAGGGGAGCCAAAGCACTAACAGATATAGTAACCCTGACTGAAGAAGCAGAATTAGAATTGGCAGAGAACAGGGAGATTCTAAAAGACCCTGTGCATGGAGTATATTATGACCCATCAAAAGACCTAGTAGCAGAAATACAGAAACAAGGGCAAGACCAATGGACATATCAAATTTATCAAGAGCCATTTAAAAATCTGAAAACAGGAAAATATGCAAGAAAAAGGTCTGCTCACACTAATGATGTAAAACAATTAACAGAAGTGGTGCAAAAAGTGTCCACAGAAAGCATAGTAATATGGGGAAAGATCCCTAAATTTAGACTACCCATACAAAAGGAAACATGGGAAGCATGGTGGATGGAGTATTGGCAGGCTACCTGGATTCCTGAATGGGAGTTTGTCAATACCCCTCCCCTAGTAAAATTATGGTACCAGTTAGAGAAAGACCCCATAGCAGGAGCAGAGACATTCTATGTAGATGGGGCAGCTAATAGGGAAACTAAGCTAGGAAAAGCAGGGTATGTCACTGACAGAGGAAGACAAAAGGTTGTTTCCCTAACTGAGACAACAAATCAAAAGACTGAATTACATGCAATCCATCTAGCCTTGCAGGATTCAGGATCAGAAGTAAATATAGTAACAGACTCACAGTATGCATTAGGGATCATTCAGGCACAACCAGACAGGAGTGAATCAGAAATAGTCAATCAAATAATAGAGAAGCTAATAGAAAAGGAAAAAGTCTACCTGTCATGGGTACCAGCGCACAAAGGGATTGGAGGAAATGAGCAAGTAGATAAATTAGTCAGTTCTGGAATCAGGAAGGTGCTATTTTTAGATGGGATAGATAAGGCTCAAGAGGACCATGAAAAATATCACTGCAACTGGAGAGCAATGGCTAGTGATTTTAATCTGCCACCTGTGGTAGCGAAGGAAATAGTAGCCAGCTGTAATAAATGTCAACTAAAAGGGGAAGCCATGCATGGACAAGTAGACTGTAGTCCAGGGATATGGCAATTAGATTGCACACATCTAGAAGGAAAAGTAATCCTAGTAGCAGTCCATGTAGCCAGTGGCTACATAGAAGCAGAAGTTATCCCAGCAGAAACAGGACAGGAGACAGCATACTTTATACTAAAATTAGCAGGAAGATGGCCAGTAAAAGTAATACACACAGACAATGGCAGCAATTTCACCAGCGCTGCAGTTAAAGCAGTCTGTTGGTGGGCAAATATCCAACAGGAATTTGGGATCCCCTACAATCCCCAAAGTCAAGGAGTAGTGGAATCCATGAACAAGGAATTAAAGAAAATCATAGGGCAGGTAAGAGAGCAAGCTGAACACCTTAAGACAGCAGTACAAATGGCAGTATTCATTCACAATTTTAAAAGAAAAGGGGGGATTGGGGGATACAGTGCAGGGGAAAGAATAATAGACATAATAGCAACAGACATACAAACTAAAGAATTACAAAAACAAATTTCAAAAATTCAAAATTTTCGGGTTTATTACAGGGACAGCAGAGACCCCATTTGGAAAGGACCAGCAAAACTACTCTGGAAAGGTGAAGGGGCAGTAGTAATACAAGACAATAGTGATATAAAGGTAGTACCAAGAAGAAAAGCAAAGATCATTAGGGATTATGGAAAACAGATGGCAGGTGATGATTGTATGGCAGGTAGACAGGATGAAGATTAGAACATGGAACAGTTTAGTAAAACATCACATGTATGTCTCCAAGAAAGCTCAAGGTTGGTTTTATAGACATCACTATGAAAGTAGACATTCAAGAGTAAGTTCAGAAGTACACATCCCACTAGGGGAAGCTAGATTAGTAGTAAGAACATATTGGGGTCTGCATACAGGAGAAAAAGACTGGCACTTGGGTCATGGGGTCTCCATAGAATGGAGGCTGAAAAGATATAGCACACAAGTAGATCCTGACCTAGCAGACCATCTAATTCACCTGCATTATTTTGACTGTTTTTCAGAATCTGCCATAAGGAGAGCCATATTAGGACAAATAGTTAGACCTAGGTGTGAATATCAAGCAGGACATAACAAGGTAGGATCTCTACAATATTTGGCTCTGAAAGCATTAGTAACCCCAACAAGGGCAAAGCCACCTTTGCCTAGTGTTAAGAAATTAACAGAGGATAGATGGAACAAGCCCCAGAAGACCAGGGGCCACAGAGGGAGCCGTACGCTGAATAGGCATTAGAGTTGTTAGAAGAGCTTAAGCATGAAGATGTTAGACATTTTCCTAGGCAGTGGCTCCATGGATTAGGACAACATATCTATAACACCTATGGGGATACTTGGGAGGGAGTTGAAGCTATAATAAGAATTTTGCAACAATTACTGTTTATTCATTTCAGAATTGGGTGCCAACATAGCAGAATAGGCATTATTCCAGGGAGAAGAGGCAGGAATGGAGCCAGTAGATCCTAACCTAGAGCCCTGGAAACACCCGGGAAGTCAGCCTACAACTGCTTGTAGCAACTGTTATTGTAAAGTGTGTTGCTGGCATTGCCAACTTTGCTTTCTGAAAAAAGGCTTAGGCATTTCCTATGGCAAGAAGAAGCGGAAACCCCGACGAGGACCTCCTCAAGGCAGTAAGGATCATCAAACTCTTATACCAAAGCAGTAAGTAATTAGCTTATGTAATGACACCTTTGGAAATCTGGGCAATAACAGGGCTGATAGTAGCACTAATCTTAGCAATAGTAGTGTGGACTATAGTAGGTATAGAATAAAAAAAAAATTGCTAAAGCAAAAAAAAATAGACAGGTTATTAAACAGAATAAGAGAAAGAGCAGAAGACAGTGGCAATGAGAGTGATGGGGATACAGAGGAATTATCAGCACTTGTGGAGATGGGGCATCATGCTCCTTGGGATGTTAATGATATGTAGTGCTGCAGACCAGCTGTGGGTCACAGTGTATTATGGGGTACCTGTGTGGAAAGATGCAGTTACCACCCTATTTTGTGCATCAGATGCTAAAGCATATGATGCAGAAGTGCATAATGTCTGGGCTACACATGCCTGTGTACCCACAGACCCCAACCCACAAGAAATAGATTTGGTCAATGTGACAGAAGAATTTAACATGTGGAAAAATAACATGGTAGATCAGATGCATGAAGATATAATCAGTCTATGGGACCAAAGCCTAAAGCCATGTGTAAAGTTAACCCCTCTCTGCGTTACGTTAGATTGCCATAACATCACCATTAACAACACCAATAACAACACCAATATCACAGATGGAGTGAGGGAAGAAATGAAAAATTGCTCTTTCAATATGACCACAGAACTAAGAGATAAGAAACAGAAAGTATATTCACTTTTTTATAGACTTGATATAGTACAAATCAATAAAACTGATAACAATAGTTATAGACTAATAAATTGTAATACCTCAACCATTACACAGGCTTGTCCCAAGGTGTCCTTTGAGCCAATTCCCATACATTATTGTGCCCCAGCTGGTTTTGCGATTCTAAAGTGTAAGGATCCTGAGTTCAATGGAAAAGGGCCATGCAGGAATGTCAGCACAGTACAATGTACACATGGAATCAAGCCAGTGGTATCAACTCAACTGCTGTTAAATGGCAGTCTAGCAGAAAGAGAAATAAGGATTAGATCTGAAAATTTCACAAACAATGCAAAAACCATAATAGTACAGCTTGTCAATCCTGTAAAAATCAATTGTTCCAGACCTTACAATACAAGAAAAAATATACGTAGGTATAGTATAGGATCAGGACAAGCATTCTATGTAACAGGTAAAATAATAGGGGATATAAGACAAGCACATTGTAATGTCAGTAGAAGGGACTGGAATAGAACTATACAACAGGTAGCTGAACAATTAAAGAAAAAGTTTAATAACAAAACAATAATCTTTGCTAGCTCCTCAGGAGGGGATATAGAAATTACAACACATAGCTTTAATTGTGGAGGAGAATTTTTCTATTGCAACACATCAGGCCTGTTTAATAGCATTTGGAATGGCAGCATGTCAAATGACATGGGGCCAAATGGCACTATAACTCTCCAATGTAGAATAAAGCAAATTATAAATATGTGGCAGAGAGTAGGACAAGCAATGTATGCCCCTCCCATCCAAGGAGTAATAAGGTGTGAATCAAACATTACAGGACTACTATTAACAAGAGATGGGGGTACTAACAATACAAAAAATGAGACCTTCAGACCTGGAGGAGGAGATATGAGGGACAATTGGAAAAGTGAATTATATAAGTATAAAGTAGTAAAAATTGAACCACTAGGAGTAGCACCCACCAGGGCAAAGAGAAGAGTGGTGGAGAGAGAAAAAAGAGCAGTTGGACTAGGAGCTATCTTCCTTGGGTTCTTAGGAGCAGCTGGAAGCACAATGGGCGCGGCGTCAATAACGCTGACGGTACAGGCCAGACAATTATTGTCTGGTATAGTGCAACAGCAGAGCAATCTGCTGAGGGCTATAGAGGCTCAACAGCATCTGTTGAAACTCACTGTCTGGGGCATTAAACAGCTCCAGGCAAGAGTCCTGGCTGTGGAAAGATACCTACAGGATCAACAGCTCCTAGGAATTTGGGGCTGCTCTGGAAAGCTCATCTGCACCACTACTGTGCCCTGGAACTCTAGTTGGAGTAATAAATCTCAGGAGGACATATGGAATAACATGACCTGGCTGCAATGGGAGAAAGAAATTAGTAGTTACACAGGCATAATATATCAACTAATTGAGGAATCGCAGAACCAGCAGGAAAAGAATGAACTAGACTTATTGGCATTGGACAAGTGGGCAAATCTGTGAAATTGGTTTAACATCTCAAATTGGCTGTGGTATATTAGACTATTTGTAATAATAGTAGGAGGCTTAATAGGATTAAGAATAGTTTTTACTGTGCTTTCTATAATCAATAGAGTTAGGCAGGGATACTCACCTCTGTCGTTTCAGACCCTTGCCCCAATCCCAGAGGGTCTCGGCAGGCCAGGAAGAATCGAAGAAGAAGGTGGAGAGCAAGGCAAAGACAGATCGATTCGCTTAGTGAGCGGATTCTTAGCGATTGCCTGGGACGACCTGCGGAACCTGTGCCTCTTCAGCTACCACCGATTGAGAGACTTCGCCTTGATTGTAGCGAGAGCTGTGGAACTTCTGGGACGCAGCAGCCTCAAGGGACTGAGACTGGGGTGGGAGGGCCTCAAATATCTGTGGAATCTTCTGCTGTATTGGGGTCGGGAACTAAAAATTAGTGCTATTACTTTGCTTGACGCTGTAGCAGTAGCAGTAGCTGGGTGGATAGATAGGGTTATAGAAATAGGACAAACAATTGGTAGAGCTATTCTCAACATACCTAGAAGAATCAGACAAGGCTTAGAAAGGGCTTTGCTATAACATGGGTGGCAAGTGGTCAAAAAAGAGCAGAGTGGAATGGCCTGAGGTTAGGAAAAGAATGAGAGAAACTCCTGCAGCAGCAAAAGGAGTAGGAGCAGTATCTCAAGATTTAGATAAATATGGAGCAGTCACAAGCAGTAATACATCATCTACTAATGCCAGTTGTGCCTGGCTGGAAGCGCAAGAGGAAGGAGACGTAGGCTTCCCAGTTAGGCCACAGGTACCTTTAAGACCAATGACTTATAAGGCAGCTTTTGATCTCAGCTTCTTTTTAAAAGAAAAGGGGGGACTGGATGGGTTAATTCACTCACAGAAAAGACAAGAAATCCTTGATCTGTGGGTCTATCACACACAAGGATTCTTCCCTGATTGGCAGAATTACACACCAGGGCCAGGAATCAGATACCCACTAACATTTGGATGGTGCTACAAGCTAGTACCAGTTGATCCAGCTGAAGTAGAGGAAGCTACTGGAGGAGAGAACAACAGTCTACTACACCCTATATGCCAACATGGAGTAGATGATGAAGAGAAAGAAGTGTTAATGTGGAAGTTTGACAGTACCCTGGCATTAAAACACAGAGCTTATGAGCTGCATCCGGAGTTCTATAAAGACTGAAAGACTGCTGACACAGAAGTTGCTGACAGGGACTTTCCACTGGGGACTTTCCGAGGGAGGTGTGGTTTGGGCGGAGTTGGGGAGTGGCTAGCCCTCAGATGCTGCATATAAGCAGCTGCTTTTCGCCTGTACTGGGTCTCTCTTGTTAGACCAGATCGAGCCTGGGAGCTCTCTGGCTAGCGAGGGAACCCACTGCTTAAGCCTCAATAAAGCTTGCCTTGAGGTGCTTGAAGTAGTGTGTGCCCGTCTGTTATTTGACTCTGGTAACTAGAGATCCCTCAGACCACTATAGACTGTGTAAAAATCTCTAGCA
>A1.UG.x.UG031_AB098331_F1.BE.93.VI850_AF077336
TGGATGGGTTAATTTACTCCAGGAAAAGACAGGAAATCCTTGATCTGTGGGTCTACAACACACAAGGCCACTTCCCTGATTGGCAGAATTACACACCAGGGCCAGGGACCAGATTCCCACTAACATTTGGATGGTGCTTCAAGTTAGTACCAGTTGATCCAGATAAAGTAGAAAGGGCTACTGAGGGAGAGAACACCAGCCTATTACACCCTATAAGCCTACATGGAATGGATGATGAAGAAGGAGAAACATTAATGTGGAAGTTTGACAGCCGCCTGGCATTTACACACAGAGCCCGAGAGCTGCATCCGGAGTACTACAAAGACTGCTGACACAGAAGTTGCTGACAAGGGACTTTCCGCTGGGGACTTTCCAGGGGAGGTGGAGTTTGGGGAGTGGCTAACCTTCAGATGCTGCATATAAGCAGCCGCTTTTCGCCTGTACTGGGTCTCTCTTGTTAGGCCAGATCGAGCCTGGGAGCTCTCTGGCTAGCTAGGGAACCCACTGCTTAAGCCTCAATAAAGCTTGCCTTGAGTGCTTCAAGTAGTGTGTGCCCGTCTGTTGTTTGACTCTGGTAACTAGAGATCCCTCAGACCACTCTAGACAGTGTAAAAATCTCTAGCAGTGGCGCCCGAACAGGGACTCGAAAGCGAAAGTTCCAGAGAAGTTCTCTCGACGCAGGACTCGGCTTGCTGAGGTGCACACAGCAAGAGGCGAGAGCGGCGACTGGTGAGTACGCCAATTTTTGACTAGCGGAGGCTAGAAGGAGAGAGATGGGTGCGAGAGCGTCAGTATTAAGCGGGGGAAAATTAGATGCATGGGAGAAAATTCGGTTAAGGCCAGGGGGAAAGAAAAAATATAGACTAAAACATATAGTATGGGCAAGCAGGGAGCTGGAAAGATTCGCACTTAACCCTAGCCTTTTAGAAACAACAGAAGGATGTCAGCAAATAATGGAACAGTTACAACCAGCTCTCAAGACAGGAACAGAAGAACTTAGATCATTATATAATACAGTAGCAACCCTCTACTGCGTACATCAAAGGATAGATGTGAAAGACACCAAGGAAGCTTTAGATAAAGTAGAGGAAATACAAAATAAAAGCAAACAAAAGACACAACAGGCAGCAGCTGGCACAGGAAACAGCAGCAAAGTCAGCCAAAATTACCCTATAGTGCAAAATGCACAAGGGCAAATGGTATACCAGGCTGTAACACCTAGGACTTTGAATGCATGGGTGAAAGTAGTAGAAGAGAGGGCTTTCAGCCCAGAAGTAATACCCATGTTCTCAGCATTATCAGAAGGAGCCACCCCACAAGATTTGAATATGATGCTGAACATAGTGGGGGGCCATCAGGCAGCTATGCAAATGTTAAAAGATACCATCAATGAGGAAGCTGCAGAATGGGACAGGTTACATCCACCACAGGCAGGGCCTGTTGCACCAGGCCAACTGAGAGACCCAAGGGGAAGTGATATAGCAGGAACTACTAGTACCCCTCAAGAACAAATAGGATGGATGACAGGCAACCCACCTATCCCAGTGGGAGACATCTATAAAAGATGGATAATCCTGGGATTAAATAAAATAGTAAGAATGTATAGCCCTGTTAGCATTTTGGATATAAAACAAGGGCCAAAAGAGCCCTTCAGAGATTATGTAGATAGGTTCTTTAAAACTCTCAGAGCTGAGCAAGCTTCACAGGAGGTAAAAGGTTGGATGACAGAAACATTACTGGTCCAAAATGCAAATCCAGATTGTAAGTCCATTCTAAAAGCATTAGGAACAGGGGCTACATTAGAAGAAATGATGACAGCATGCCAGGGAGTGGGAGGACCCAGCCATAAAGCAAGGATTTTGGCTGAGGCAATGAGTCAAGCACAACATACAAACATAATGATGCAGAGAGGTAATTTTAGAGGCCAGAAAAGGATTAAGTGTTTCAACTGTGGCAAAGAAGGACACCTAGCCAAACATTGCAGGGCCCTTAGGAAAAAGGGCTGTTGGAAATGTGGGAAGGAGGGACACCAAATGAAAGACTGCACTGAAAGACAGGCTAATTTTTTAGGGAAAATTTGGCCTTCCAGCAAGGGGAGGCCAGGAAATTTTCCACAGAGCAGACCGGAGCCAACAGCCCCACCAGCGGAGCTCTTTGGGATGGGGGGAGAGATATTCTCCCCTCCGAAGCAGGAACAAAAAGACAGGGACCAGGCCTCACCTTTAGTTTCCCTCAAATCACTCTTTGGCAACGACCCCTTGTCACAGTAAAAATAGGGGGACAGCTAAAAGAAGCTCTATTAGATACAGGAGCAGATGATACAGTATTTGAAGACATAAATTTGCCAGGAAAATGGAAACCAAGAATGATAGGGGGAATTGGAGGTTTCATCAAAGTAAAACAGCATGATCAGATACTTATAGAAATTTGTGGAAAAAAGGCTATAGGTACAGTGTTGGTAGGACCTACACCTGTCAACATAATTGGAAGAAATATGTTGACCCAGATTGGTTGTACTTTAAATCTCCCAATTAGTCCTATTGATACTGTACCAGTAAAATTAAAGCCAGGAATGGATGGCCCAAAGGTTAAACAATGGCCATTGACAGAAGAAAAAGTAAAAGCATTAACAGAAATTTGTATAGATATGGAAAAGGAAGGAAAAATTTCAAGAATTGGGCCTGAAAATCCATACAATACTCCAATATTTGCTATAAAGAAAAAAGACAGCACTAAATGGAGAAAATTAGTAGATTTCAGAGAGCTCAATAAAAGAACTCAAGACTTTTGGGAAGTTCAATTAGGAATACCGCACCCAGCGGGCTTAAAAAAGAAAGAATCAGTGACAGTACTAGATGTGGGGGACGCATATTTTTCAGTTCCCTTAGATGAAAGCTTTAGAAAGTATACTGCATTCACCATACCTAGTACAAACAATGAGACACCAGGAATCAGGTATCAGTACAATGTGCTTCCACAGGGATGGAAAGGATCACCAGCAATATTCCAGAGTAGCATGACAAAAATTTTAGAGCCCTTCAGATCAAAAAATCCAGAAATAATTATCTATCAGTACATGGATGACTTGTATGTGGGATCTGATTTAGAAATAGGGAAGCATAGAGCAAAAATAGAAGAGTTGAGAGCTCATCTATTGAGCTGGGGGTTTACTACACCAGACAAAAAGCATCAGAAAGAACCTCCATTTCTTTGGATGGGATATGAACTCCATCCTGACAAGTGGACAGTCCAACCTATAGAGCTGCCAGTAAAAGAAAGCTGGACTGTCAATGATATACAGAAATTAGTGGGAAAACTAAATTGGGCGAGTCAAATTTATGCAGGAATTCAAGTAAAACAATTGTGTAAACTCCTCAGGGGAGCCAAAGCACTAACAGATATAGTAACGTTGACTGAGGAAGCAGAATTAGAATTGGCAGAGAACAGGGAAATTCTAAAAGACCCTGTGCATGGAGTATATTATGACCCATCAAAAGACTTAATAGCAGAAATACAGAAACAAGGGCAAGACCAATGGACATATCAAATTTATCAAGAGCCATTTAAAAACCTGAAAACAGGAAAATATGCAAGAAAGAGGTCTGCTCACACAAATGATGTAAAACAATTAGCAGAAGTAGTGCAAAAGGTGACCATGGAAAGCATAGTAATATGGGGAAAGACTCCTAAATTTAAACTACCCATACAAAAAGAAACATGGGAAACATGGTGGAGGGACTATTGGCAGGCTACCTGGATTCCTGAATGGGAGTTTGTCAATACCCCTCCTCTAGTAAAATTATGGTACCAGCTAGAGAAAGACCCTATAGTAGGAGCAGAAACTTTCTATGTAGATGGGGCAGCTAATAGGGAAACTAAGCTGGGAAAGGCAGGGTATGTCACTGACAGAGGAAGACAAAAAGTTGTTTCCCTAAATGAGACAACAAATCAAAAAACTGAATTACATGCTATCTATCTAGCCTTGCAAGATTCAGGATCAGAAGTAAATATAGTAACAGACTCACAGTATGCATTAGGAATCATTCAGGCACAACCAGACAGGAGTGAATCAGGGTTAGTCAGTCAAATAATAGAGAAGCTAATAGAAAAAGACAAAGTCTACCTATCATGGGTACCAGCACACAAGGGAATTGGAGGAAATGAACAAGTAGATAAATTAGTCAGTTCAGGAATCAGGAAGGTGCTATTTTTAGATGGGATAGATAAGGCTCAAGAAGAACATGAAAGATATCACAGCAATTGGAGAACAATGGCTAGTGATTTTAATCTGCCACCTGTAGTAGCAAAGGAAATAGTGGCCAGCTGTGATAAATGTCAACTAAAAGGAGAAGCCATGCATGGACAAGTAGACTGTAGCCCAGGAATATGGCAATTAGATTGCACACATCTAGAAGGAAAAGTAATCCTGGTAGCAGTCCATGTGGCCAGTGGGTATATAGAAGCAGAAGTTATCCCAGCAGAAACAGGACAGGAGACAGCATACTTTCTGCTAAAATTAGCAGGAAGATGGCCAGTAAAAGTAGTGCACACAGACAATGGCCCCAATTTCACCAGCGCTACAGTTAAAGCAGCTTGCTGGTGGGCAAATATCCAACAGGAATTTGGGATTCCCTACAATCCCCAAAGTCAAGGAGTAGTGGAATCTATGAATAAGGAATTAAAGAAAATCATAGGGCAGGTAAGAGACCAAGCTGAACACCTTAAGACAGCAGTACAAATGGCAGTATTCATCCACAATTTTAAAAGAAAAGGGGGGATTGGGGGGTACAGTGCAGGGGAAAGAATAATAGACATAATAGCAACAGATCTACAAACTAAAGAATTACAAAAACAAATTACAAAAATTCAAAAATTTCGGGTTTATTACAGGGACAGCAGAGATCCAATTTGGAAAGGACCAGCAAAACTACTCTGGAAAGGTGAAGGGGCGGTAGTAATACAAGACAACAGTGATATAAAGGTAGTGCCAAGAAGAAAAGCAAAGATCATTAGGGATTATGGAAAACAGATGGCAGGTGATGATTGTGTGGCAGGTAGACAGGATGAGGATTAAAACATGGAATAGTTTAGTAAAACATCATATGTATATCTCAAAGAAAGCTAATGGTTGGTCTTATAGACATCACTATGAAAGCAGACATCCAAAAGTAAGTTCAGAAGTACACATCCCACTAGGGGATGCTAGAATAGTAGTAAGAACATATTGGGGGCTGCATACAGGAGAAAAAGACTGGCACTTGGGTCATGGAGTCTCCATAGAATGGAGGCTAAAAAGATATAGCACACAATTAAATCCTGACCTGGCAGACCAACTAATTCATGTGTATTATTTTGACTGTTTTTCAGAATCTGCCATAAGGAAAGCCATATTAAGACAAGTAGTTAGCCCTAGTTGTGAATATCAAACAGGACACAACAAGGTAGGATCTCTACAATATTTAGCACTGAAAGCATTAGTAACACCAACAAGAACAAAGCCACCTCTGCCAAGTGTTAGGAAATTAGCAGAGGATAGATGGAACAAGCCCCAGAAGACCAGGGGCCCCAGAGGGAGCCATACAATGAATGGATGTTAGAACTGTTAGAAGATCTTAAACATGAAGCTGTTAGGCATTTTCCTAGGCCATGGCTCCATGGGTTAGGACAACATATCTATAACACCTATGGGGATACTTGGGAAGGAGTTGAAGCTATAATGAGAATTTTGCAACAACTACTGTTTGTTCATTTCAGAATTGGGTGCCAACATAGCAGAATAGGCATCATTCGAGGGAGAAGAGTCAGGGATGGATCCAGTAGATCCTAACCTAGAGCCCTGGAACCATCCAGGAAGTCAGCCTACAACTCCTTGTAACAAGTGTTACTGTAAAGTATGTTGCTATCACTGCCAAGCTTGCTTTTTACACAAAGGCTTAGGCATCTCCTATGGCAGGAAGAAGCGGAAACAGCGCCAGCGACGAGGAACTCCTCAAAGCAATAAGGATCATCAAAATCCTCTACAAAAGCAGTAAGTATTAGTAACTAGTAGAGGTAATGCTTTCTTTGGAAATCTGTGCAATAGTAGGACTGATAGTGGTAGGAATCATAGCAATAGTTGTGTGGACTCTAGTAGGTATAGAATATAAGAGATTGCTAAAACAAAGGAAAATAGACAGGTTAATTAAGAGAATAAGAGAAAGAGCAGAAGACAGTGGCAATGAGAGTGAGGGGGATACAGACGAGTTGGCAAAACTTGTGGAGATGGGGAACTATGATCTTGGGAATGCTAATGATTTATAGTGCTGCAGAAAACTTGTGGGTTACTGTCTACTACGGGGTACCTGTGTGGAAAGACGCAGAGACCACCTTATTTTGTGCATCAGATGCTAAAGCATATGATACAGAAGTACATAATGTCTGGGCGACACATGCCTGTGTACCCACAGACCCCAACCCACAAGAAATACACTTGGAAAATGTGACAGAAGATTTTAACATGTGGAAAAATAATATGGTAGAGCAGATGCATACAGATATAATCAGTCTATGGGATCAGAGCCTAAAGCCATGTGTAGAATTAACCCCTCTCTGCGTTACTTTAGATTGTCTAAACGCCACCCTCAATGCCACCGCCCCCAATGTCACCAATGACATGGAAGGAGAAATGAAAAACTGCTCTTACAATATAACCACAGAATTAAAGGATAAGAAACAGCAAGTGTATTCACTTTTTTATAAGCTTGATGTAGTACAAATTAATGAAAAGAATAAAACAAACAAGTATAGATTAATAAATTGTAATACCTCAGCCATTACACAGGCTTGTCCAAAGGTATCCTTTGAGCCAATTCCCATACATTATTGTGCCCCAGCTGGCTTTGCGATTCTAAAGTGTAAGGATACAGAGTTCAATGGAACAGGGCCATGCAAGAATGTCAGCACAGTACAATGCACACATGGAATCCGGCCAGTAATATCAACTCAACTGCTGTTAAATGGTAGTCTAGCAGAAGGAGGGATACAGATTAGATCTGAAAATATCACAAACAATGCCAAAACCATAATAGTACAACTTGATAAGGCTGTAAAAATTAATTGTACCAGACCTAACAACAATACAAGAAAAAGTGTAAGGATAGGACCAGGACAAGCATTCTATGCAACAGGTGATATAATAGGGGATATAAGACAGGCACATTGTAATGTCAGTAGAGCAAAATGGAACGAAACTTTACGAGGGATAGCCAAAAAACTAAGCGAACACTTTAAAAACAAAATAATAATCTTTGAGAAATCCTCAGGAGGGGATATAGAAATTACAACACATAGTTTTAATTGTGGAGGAGAATTTTTCTATTGTAATACATCAGGCCTGTTCAATGGCACCTGGAAGCCAAACAGCACAGAGTCAAACAACACAACGCCAAATGACACTATAACTCTTACATGCAGAATAAAGCAAATTATAAATATGTGGCAGAAAGTAGGACAAGCAATGTATGCCCCTCCCATTCAAGGAGTAATAAGGTGTGAATCAAACATTACAGGACTACTATTAACAAGAGATGGAGGGATTAACAGTATAAATGAAACCTTCAGACCTGGAGGAGGAAATATGAGGGACAATTGGAGAAGTGAATTATATAAGTATAAAGTAGTAAAAATTGAACCACTAGGAGTAGCACCCTCCAGGGCAAAGAGAAGAGTGGTGGAGAGAGAAAAAAGAGCAGTTGGAATAGGAGCTGTCTTCCTTGGGTTCTTAGGAGCAGCTGGAAGCACTATGGGCGCGGCGTCAATAACGCTGACGGCACAGGCCAGACAATTATTGTCTGGTATAGTGCAACAGCAAAGCAATTTGCTGAGGGCTATAAAGGCTCAACAGCATATGTTGAAGCTCACGGTCTGGGGCATTAAACAGCTCCAGGCACGAGTCCTGGCTGTGGAAAGATATCTAAAGGATCAACAGCTCCTAGGAATTTGGGGCTGCTCTGGAAAACTCATCTGCACCACTAATGTGCCCTGGAACTCTAGTTGGAGTAATAAATCTCAGGAAGAGATTTGGAATAACATGACCTGGATGGAGTGGGAAAAGGAGATTAGCAATTACTCAAACATAATATACAAATTGATTGAAGAGTCACAAAACCAGCAGGAAAAGAATGAACAAGACTTGTTGGCATTGGACAAGTGGGCAAGTCTGTGGAATTGGTTTGACATATCAAGGTGGCTGTGGTATATAAAAATATTTATAATGATAGTAGGAGGCTTAATAGGATTAAGAATAGTTTTTGCTGTGCTTTCTGTAATAAATAGAGTTAGGCAGGGATACTCACCTCTGTCATTCCAGATCCGTACCCCAAACCCAGAGGAACCCGACAGGCTCGGAAGAATCGGCGAAGAAGGTGGAGAGCAAGACAGAGACAGATCGATTCGATTAGTAAGCGGATTCTTAGCACTTGCCTGGGACGACCTGCGGAGCCTGTGCCTTTTCAGCTACCACCGCTTGAGAGACTTCATCTCGATTGCAGCGAGGACTGTGGAACTTCTGGGACACAGCAGTCTCAAGGGACTGAGACTGGGGTGGGAAGGCCTCAAGTATCTGTGGAATCTTCTGTTATATTGGGGCCTGGAGCTAAAAACTAGTGCTGTCAATTTGGTTGATACCATAGCAATAGCAGTAGCTGGCTGGACAGATAGGGTTATAGAAATAGGACAAAGAATTTTTAGAGCTATTCTTAACATACCTAGAAGAATCAGACAGGGCCTTGAAAGGGGCTTGCTATAACATGGGTGGTAAGTGGTCAAAAAGTAGCATAGTGGGATGGCCTCAGGTTAGGGAAAGAATGAGACAAACTCCTCCAGCAGCAGAAGGAGTAGGAGCAGTATCTCAAGATTTAGATAAATATGGAGCAATCACGAGCAGTAATATAAATCACCCTAGTTGCACCTGGCTGGAAGCGCAAGAGGAAGAGGAGGTAGGCTTCCCAGTCAGACCGCAAGTACCTCTAAGACCAATGACTTACAAGGGAGCTCTGGATCTCAGCCACTTTTTAAAAGAAAAGGGGGGACTGGATAGGTTAATTTACTCCAGGAAAAGACAAGAAATCCTTGATCTGTGGGTCTACAACACACAAGGCTACTTCCCTGATTGGCAGAATTACACACCAGGGCCAGGGATCAGATACCCACTAACATTTGGATGGTGCTTCAAGCTAGTACCAGTTGATCCAGAGGAAGTAGAGAAGGCTACTGAGGGAGAGAACAACTGCCTATTACACCCTATAAGCCAACATGGAATGGAGGATGAAGAAAGAGAAACATTAATGTGGCAGTTTGACAGCCGCCTGGCACTTACACACAGAGCTCAAGAGTTGCATCCGGAGTTCTACAAGAACTGCTGACACAGAAGATGCTGACAGGGACTTTCCGCTAGGGACTCTCCAGGGGAGGTGTGGTTTGGGCGGAGTTGGGGAGTGGCTAACCCTCAGATGCTGCATATAAGCAGCTGCTTTTCGCCTGTACTGGGTCTCTCTTGTTAGACCAGATAGAGTCTGGGAACTCTCTGGCTAGCGAGGGAACCCACTGCTTAAGCCTCAATAAAGCTTGCCTTGAGTGC
>A1.UZ.02.02UZ0659_AY829209_F2.CM.95.MP257_AJ249237
GCGAGAGCGTCAGTATTAAGCGGGGGAAAATTAGATGCATGGGAAAAAATTCGGCTAAGGCCAGGGGGAAAGAAAAAATATAGAATAAAACACCTAGTATGGGCAAGCAGGGAGCTGGAAAGATTCGCGCTTAACCCTAGCCTTTTAGAAACATCAGAAGGATGTCAACAAATACTGGAACAATTACAACCAACTCTCAAGACAGGATCAGAAGAACTTAAATCATTATATAATACAGTAGCAACCCTCTATTGTGTACATCAACGGATAGAGATAAAAGACACCAAGGAAGCTTTAGATAAAATAGAGGAAATACAAAATAAGAGCAAGCAAAAGACCCAACAGGCAGCAACTGTCACAGGAAGCAGCAGCAAGGTCAGTCAAAATTACCCCATAGTGCAAAATGCACAAGGGCAAATGACACACCAGTCCATGTCACCTAGGACTTTGAATGCATGGGTGAAAGTAATAGAAGAGAAGGCTTTCAGCCCAGAAGTAATACCCATGTTTTCAGCATTGTCAGAGGGAGCCACCCCACAAGATTTAAACATGATGCTGAACATAGTGGGGGGACACCAGGCAGCTATGCAAATGTTGAAAGATACCATCAATGAGGAAGCTGCTGAATGGGATAGGATACATCCAGCACAGGCAGGGCCTTTTCCACCGGGGCAGATGAGAGAACCAAGGGGAAGTGACATAGCAGGAACTACTAGTACCCTTCAAGAACAAATAGGATGGATGACAAGCAACCCACCTATCCCAGTGGGAGACATCTATAAAAGATGGATAATCCTAGGATTAAATAAAATAGTACGAATGTATAGCCCTGTTAGCATTTTAGACATAAGACAAGGGCCAAAAGAACCCTTCAGAGACTATGTAGATAGGTTCTTTAAAACTCTTAGAGCTGAGCAAGCTACACAGGATGTAAAGAACTGGATGACAGAAACCCTGCTGGTCCAAAATGCAAATCCAGATTGTAAAACTATTTTAAGAGCATTAGGATCAGGGGCTACATTAGAAGAAATGATGACAGCATGCCAGGGAGTGGGAGGACCCGGCCATAAAGCAAGGGTTTTGGCCGAGGCAATGAGTCAAGTACAAAATGCAAACATAATGATGCAGAAAAGTAATTTTAGGGGCCCAAAAAGAATTAAGTGTTTCAACTGTGGCAAAGAAGGACACCTAGCCAGAAATTGCAGGGCCCCTAGGAAAAAGGGCTGTTGGAAATGTGGAAAGGAAGGCCATCAAATGAAAGACTGCACTGAGAGACAGGCTAATTTTTTAGGGAGAATTTGGCCTTCCAGCAAAGGGAGGCCAGGAAATTTTCCTCAGAGCAGACCAGAACCATCAGCCCCACCAGCAGAAAACTTTGGGATGGGGGAAGAGATAACCCCTTCCCTGAAACAGGAACAGAAAGACAGGGAACAACATCCTCCTTCAATTTCCCTCAAATCACTCTTTGGCAACGACCCCTTGTCACAGTAAGAATAGGAGGACAGCTAAAAGAAGCTCTATTAGATACAGGAGCAGATGATACGGTATTAGAAGACATAAATTTGCCAGGAAAATGGAAACCAAAAATGATAGGGGGAATTGGAGGTTTTATCAAGGTAAGACAGTATGATCAGATACTTATAGAAATTTGTGGAAAAAAGGCTATAGGTACGGTATTAATAGGGCCTACCCCTGTCAACATAATTGGAAGAAATATGTTGACTCAGCTTGGTTGTACTTTAAATTTTCCAATAAGTCCTATTGAAACTGTACCAGTAACATTAAAGCCAGGAATGGATGGCCCAAAGGTTAAACAATGGCCATTAACAGAAGAGAAAATAAAAGCATTAATAGACATTTGTAAGGAGATGGAGAAGGAAGGAAAAATTTCAAAAATTGGGCCAGAAAATCCATACAATACTCCAGTATTTGCCATAAAAAAGAAGGACAGTACTAAATGGAGAAAATTAGTAGATTTCAGAGAGCTCAATAAAAGAACTCAGGACTTTTGGGAAGTTCAATTAGGAATACCCCATCCAGCGGGTTTAAAAAAGAAAAAATCAGTAACAGTACTAGATGTGGGGGATGCATATTTTTCAGTTCCTTTAGATGAAAGCTTCAGAAAGTATACTGCATTCACTATACCAAGTATAAACAATGAGACACCAGGGATCAGATATCAGTACAATGTACTCCCACAGGGATGGAAAGGATCACCATCAATATTCCAGAGTAGCATGACAAAAATCTTAGAGCCATTTAGATTAAAAAATCCAGAAATAGTTATTTATCAATACATGGATGACTTGTATGTAGGCTCTGATTTAGAAATAGGGCAACATAGAACAAAAATAGAGGAGTTAAGAGCTCATCTATTGAGCTGGGGATTTACTACACCAGACAAAAAGCATCAGAAAGAACCTCCATTTCTTTGGATGGGATATGAACTCCATCCTGACAAATGGACAGTCCAGCCTATAATGCTACCAGATAAAGACAGCTGGACTGTCAATGATATACAGAAATTAGTAGGAAAACTAAATTGGGCAAGTCAGATTTATCCAGGGATTAAAGTAAGGCAATTGTGTAAACTCCTCAGGGGAGCCAAAGCACTGACAGATATAGTGACACTGACTGAGGAAGCAGAATTAGAATTGGCAGAGAACAGAGAGATTCTAAAAGAACCGGTGCATGGAGTATATTATGACCCATCAAAAGATTTAGTAGCAGAAATACAGAAACAAGGACAAGACCAATGGACATATCAAATTTATCAGGAGCCATTTAAAAATCTAAAAACAGGAAAATATGCAAAAAAGGGGTCTGCTCACACTAATGATGTAAAACAATTAACAGCAGTGGTGCAAAAAGTGGCCACAGAAAGCATAATAATATGGGGAAAGACTCCTAAATTTAGACTACCCATACAAAAAGAAACATGGGAAGCATGGTGGATGGAGTACTGGCAGGCTACCTGGATTCCTGAATGGGAGTTTGTCAATACCCCTCCTCTAGTAAAACTATGGTACCAGTTGGAGAAAGAACCCATAGTAGGAGCAGAGACTTTCTATGTAGATGGGGCAGCTAACAGGGAGACTAAGATAGGAAAAGCAGGGTATGTTACTGACAGAGGAAGACAAAAGGTTGTGCCTCTAACTGAGACAACAAATCAAAAGACTGAATTACATGCAATCCATCTAGCTTTGCAGGATTCAGGATCAGAAGTAAATATAGTAACAGACTCACAATATGCATTAGGAATTATTCAGGCACTACCAGACAGGAGTGAATCAGGGATAGTCAACAAAATAATAGAGAAACTAATAGAAAAAGAAAAAGTCTACCTGTCATGGGTACCAGCGCACAAGGGGATTGGAGGAAATGAACAAGTAGATAAATTAGTCAGTAATGGAATCAGGAGGGTGTTATTTTTAGAAGGGATAGATAAGGCTCAAGAAGAACATGAAAAATATCACAGCAATTGGAAAGCAATGGCTAGTGATTTTAATCTGCCACCTATAGTAGCAAAGGAAATAGTAGCCAGCTGTGATAAATGTCAATTAAAAGGGGAAGCTATGCATGGACAGGTAGACTGTAGTCCAGGGATATGGCAATTAGACTGCACACATCTAGAAGGAAAAGTAATCATGGTAGCAGTCCATGTAGCCAGTGGCTATATAGAAGCAGAAGTTATCCCAGCAGAAACAGGACAGGAGACAGCATACTTTCTGCTAAAATTAGCAGGAAGATGGCCAGTAAAAGTAGTACACACAGATAATGGCCCCAATTTCACCAGCAGTGCAGTTAAGGCTGCCTGTTGGTGGGCAAATATCCAACAGGAATTTGGGATTCCCTACAATCCCCAAAGTCAAGGAGTAGTGGAGTCTATGAATAAGGAATTAAAGAAAATCATAGGGCAGGTAAGAGAGCAAGCTGAACACCTTAAGACAGCAGTACAAATGGCAGTATTCATTCACAATTTTAAAAGAAAAGGGGGGATTGGGGGGTACAGTGCAGGGGAAAGAATAATAGACATAATAGCAACAGACATACAAACTAAAGAATTACAAAAACAAATTATAAAAATTCAAAATTTTCGGGTTTATTACAGAGACAGCAGAGATCCAATTTGGAAAGGACCAGCAAAACTACTCTGGAAAGGTGAAGGGGCAGTGGTAATACAGGACAATAACGATATAAAAGTAGTACCAAGAAGAAAAGCAAAGATCATTAGGGATTATGGAAAACAGATGGCAGGTGATGATTGTGTGGCAAGTAGACAGGAGGAGGATTAGAACATGGAACAGTTTAGTAAAACACCATATGTATGTCTCAAAGAAAGCTAGAGAGTGGTTTTATAGACATCACTATGAAAGCAGAAATCCAAGAGTAAGTTCAGAAGTACACATCCCACTAGGGGATGCTAGGCTAGTAGTAAAAACATATTGGGGTCTGCATACAGGAGAAAAAGACTGGCACTTGGGTCATGGGGTCTCCATAGAATGGAGACAGGAAAGGTATAGCACACAAATAGACCCTGACCTGGCGGACCAACTAATTCATTTGTACTATTTTGACTGTTTTTCAGAATCTGCCATAAGGAAAGCCATAGTAGGACACATAGTTAGCCCTAGGTGTAACTATCCAGCAGGACACAACAAGGTAGGATCTCTACAATACTTGGCACTGAAAGCATTAGTAACACCAACAAGGGAAAGGCCACCTTTGCCTAGTGTTAGGAAACTAACAGAGGATAGATGGAACAAGCCCCAGAAGACCAGGGGCCGCAGAGGGAACCACACAATGAATGGATGTTAGAACTGTTAGAAGATATTAAGCATGAAGCTGTCAGACATTTTCCAAGGCCGTGGCTCCATGGATTAGGACAACATATCTATAACACCTATGGGGATACTTGGGAAGGGGTTGAAGCTATAATAAGAACTTTGCAACAACTACTGTTTGTTCATTTCAGAATTGGGTGCCTACATAGCAGAATAGGCATTGTGCAAAGGAGAAGAGTCAGGAATGGATCCGGTAGATCCTAACCTAGAGCCCTGGAATCATCCGGGAAGTCAGCCTAAAACTGCTTGTAGCAATTGTTACTGTAAAAAGTGTTGCTGGCATTGCCAAGTTTGCTTTCTAAAAAAAGGCTTAGGCATCTCCTATGGCAGGAAGAAGCGGAGACACAGACGAGGAACTCCTCACAGCAGTAAGGATCATCAAAATCTTATATCAAAGCAGTAAGTACTAAATAAATGTAATGACACTTTTAGAAATCTATGCAATAGTAGCATTAGTAGTAGTGTTTGTCATAGCAATAGTTGTGTGGACTATAGTAGGTATAGAATATAGGAAATTACTAAAACAAAGAAAAATAGACAGGTTAATTGAGAGAATAAGAGAAAGAGCAGAAGATAGTGGCAATGAAAGCGAGGGGGATGCAGAGGAATTATCAACACTTATGGAGGTGGGGAACTATGCTCTTTTGGATGATAATAATGTGTAAGGCTGCAGAAAACTTGTGGGTCACGGTATACTATGGGGTACCTGTGTGGAGAGATGCAGAGACCACCCTATTTTGTGCATCAGATGCTAAAGCATATGATAAAGAAGTACACAATGTCTGGGCTACACATGCCTGTGTACCCACAGACCCTGACCCACAAGAAATTGCTTTGGAAAATGTGACAGAAAATTTTGACATGTGGAAAAATAACATGGTAGAACAAATGCAAATAGATATAATCAGTCTCTGGGACCAAAGCCTAAAGCCATGTGTAAAGTTAACCCCTCTCTGCGTTACTTTAAATTGTGCTGAACCCAACAGCACTAGCTCTAACAACAGTAGCGTTAACAGCAACAGCAGCGATAGTTTGTTTAAAGAAATGAAAAACTGCACTTTCAACATGACCACAGAACTAAGAGATAAAAGGAAAACTGTACATTCACTTTTTTATAAACTTGATATAGTATCAACTGATAGTAATGGTAGTGGGCAGTATAGACTAATAAATTGCAATACATCAACCATGACACAGGCCTGTCCTAAGGTAACCTTTGAGCCAATTCCTATACATTATTGTGCCCCAGCTGGTTTTGCGATTCTAAAGTGCAAGGATCCAAATTTTACTGGAACAGGGCCATGCAAGAATGTCAGCACAGTACAATGCACACATGGAATCAAGCCAGTAGTATCAACTCAACTGCTGTTAAATGGCAGTCTAGCAGAGAAAGAGGTAATGCTTAGATCTGAAAATATCACAGACAATGGCAAAACCATAATAGTACAGCTTACTGAGCCTGTAAACATCACTTGTATCAGACCTGGCAACAATACAAGAACAAGTATACGTATAGGACCAGGACAAACCTTCTATGCAACAGGTGATGTAATAGGGGACATAAGAAAAGCATATTGTAATGTCAGCAGAGCAGCATGGAATAACACTTTACAAAAGATAAGTACACAATTAAAAAAATACTTTAATAACAAAACAATAATCTTTAAGAACTCCTCAGGAGGGGATTTAGAAGTTACAACACATAGTTTCAATTGTGGAGGAGAATTTTTCTATTGCAATACAACAGACCTGTTCAATAGCACTTGGGGCAATGTCACAAATGTCACAAAGGCCAATGAAACTACTATAACTCTACCATGCAGAATAAAGCAAATTATAAATATGTGGCAGAGAGTAGGACAAGCAATGTATGCCCCTCCTATCAAAGGAAGTATAAGGTGTAAATCAAACATTACAGGACTACTACTAACAAGAGATGGTGGAGGTGGAACTAATAGCAGCAATGAGACCTTCAGACCTATAGGAGGAAATATGAAGGACAATTGGAGAAGTGAACTATATAAGTATAAAGTAGTAAAAATTGAACCAATAGGAGTAGCACCTACCAAGGCAAAGAGAAGAGTGGTGGAGAGAGAAAAAAGAGCAATTGGACTGGGAGCTGCCCTCCTTGGGTTCTTAGGAGCAGCAGGAAGCACTATGGGCGCGGCGTCAATGACGCTGACGGTACAGGCCAGACAATTGTTGTCTGGCATAGTGCAACAGCAAAGCAATTTGCTGAGGGCTATAGAGGCTCAGCAGCATCTGCTGAAACTCACGGTCTGGGGCATTAAACAGCTCCAGGCAAGAGTCCTGGCTGTGGAAAGATACCTAAAGGATCAGCAGCTCCTAGGAATTTGGGGTTGCTCTGGAAAACTCATCTGCACCACTAATGTGCCCTGGAACTCTAGTTGGAGTAACAAATCTCAGAGTGAGATATGGGATAACATGACCTGGATGCAATGGGACAAGGAAGTTATCAATTACACAAACACAATATATGATCTAATTGAAAAATCGCAAAACCAGCAGGAAAAGAATGAACAAGATTTATTGGCATTGGACAAGTGGGCAAGTCTGTGGAGTTGGTTTGACATATCAAATTGGTTATGGTATATAAAAATATTTATAATAATCGTAGGAGGCTTAATAGGATTAAGAATAGTTTTTGCTGTGCTTTCTATAATAAATAGAGCCAGGCAGGGATACTCACCCTTGTCATTGCAGACCCTTACCCCACACCCAGAGGGACCAGACAGGCCCGGAAGAATCAACGAAGAAAGTGGAGAGCAAGGCAGAGACAGATCAGTTCGATTGGTGAGCGGATTCTTAGCACTTGCCTGGGACGATCTGCGGAGCCTGTGTCTCTTCAGCTACCACCGATTGAGAGACTTCATCTCGATTGCAGCGAGGACTGTGGAACTTCTGGGACGCAGCAGTCTCAAGGGACTGAGACTGGGGTGGGAGGGCCTCAAGTATCTGGGGAATCTTCTGGGATATTGGGGTCAGGAACTAAAGAGTAGTGCTATCAATCTAATAGATACCATAGCAATAGCAGTAGCTAGGTGGACAGATAGGGTTATAGAAACAGTACAAAGACTTTGTAGAGCCATTCGTAACATACCTAGGAGAATCAGACAGGGCGCAGAAAAGGCTTTGCAATAACATGGGGGGCAAATGGTCAAAAAGTAGTATAGTGGGATGGCCTCAGGTTAGGGAAAGAATAAGACGAGCTCCTGCTCCAGCAGCAAGAGGAGTAGGACCAGTATCTCAAGATTTGGATAAGCATGGAGCAGTCACAAGCAGTAATACAGCAGCCAATAATGCTGATTGCGCCTGGCTGGAGGCGCAAGAGGAAGAGGAGGTAGGCTTTCCAGTCAAGCCGCAGGTACCTTTGAGACCGATGACATATAAGGGAGCTATCGATCTCAGCCACTTTTTAAAAGAAAAGGGGGGACTGGATGGGCTAATTTACTCCAAGAAAAGACAAGAAATCCTTGATCTGTGGGTCTATCACACACAAGGCTACTTCCCTGATTGGCAGAATTATACCCCAGGGCCAGGGATTAGATTCCCACTAACATTTGGGTGGTGCTACAAGCTAGTACCAGTTGACCCAGAGGAAGTAGAAGAGGCCACAGAGGGAGAGAACAACAGCCTATTACACCCTATATGCCAACACGGAATGGATGATGAGGAAAAAGAAGTGTTAATGTGGAAGTTTGACAGTCGCCTGGCTCTAACACACAGAGCCCGAGAGCTACATCCGGAGTTCTACAAAGACTGCTGACACAGACTGCTGACATGAAGTTGCTGACAGGGACTTTCCGCGGGGACTTTCCAGGGGAGGTGTGGTTTGGGGAGTGGCTAACCCTCAGATGCTGCATATAAGCAGCTGCTTTTCGCCTGTACTGGGTCTCTCTGGTTAGACCAGATCGAGCCTGGGAGCTCTCTGGCTAGCTAGGGAACCCACTGCT
>A1.UZ.02.02UZ694_AY829205_G.ES.00.X558_AF423760
GCGAGAGCGTCAGTATTAAGCGGGGGAAAATTAGATGCATGGGAAAAAATTCGGTTAAGGCCAGGGGGAAAGAAAAAATATAGAATAAAACACCTAGTATGGGCAAGCAGGGAGCTGGAAAGATTCGCGCTTAACCCTAGCCTTTTAGAAACATCAGAAGGATGTCAACAAATACTGGAACAGTTACAACCAACTCTCAAGACAGGATCAGAAGAACTTAAATCATTATATAATACAGTAGCAACCCTCTATTGTGTACATCAACGGATAGAGATAAAAGACACCAAGGAAGCTTTAGATAAAATAGAGGAAATACAAAATAAGAGCAAGCAAAAGACCCAACAGGCAGCAACTGTCACAGGAAGCAGCAGCAAGGTCAGTCAAAATTATCCCATAGTGCAAAATGCACAAGGGCAAATGACACACCAGTCCATGTCACCTAGGACTTTGAATGCATGGGTGAAAGTAATAGAAGAAAAGGCTTTCAGCCCAGAAGTAATACCCATGTTTTCAGCATTGTCAGAGGGAGCCACCCCACAAGATTTAAACATGATGCTGAACATAGTGGGGGGACACCAGGCAGCTATGCAAATGTTGAAAGATACCATCAATGAGGAAGCTGCTGAATGGGATAGGTTACATCCAACACAGGCAGGGCCTTTTCCACCAGGGCAGATGAGAGAACCAAGGGGAAGTGACATAGCAGGAACTACTAGTACCCTTCAAGAACAAATAGGATGGATGACAAGCAACCCACCTATCCCAGTGGGAGACATCTATAAAAGATGGATAATCCTAGGATTAAATAAAATAGTACGAATGTATAGCCCTGTTAGCATTTTAGACATAAGACAAGGGCCAAAAGAACCCTTCAGAGACTATGTAGATAGGTTCTTTAAAACTCTTAGAGCTGAGCAAGCTACACAGGATGTAAAGAACTGGATGACAGAAACCCTGCTGGTCCAAAATGCAAATCCAGATTGTAAAACTATTTTAAGAGCATTAGGATCAGGGGCTACATTAGAAGAAATGATGACAGCATGCCAGGGAGTGGGAGGACCCGGCCATAAAGCAAGGGTTTTGGCCGAGGCAATGAGTCAAGTACAAAATGCAAACATAATGATGCAGAAAAGTAATTTTAGGGGCCCAAAAAGAATTAAGTGTTTCAACTGTGGCAAAGAAGGACACCTAGCCAGAAATTGCAGGGCCCCTAGGAAAAAGGGCTGTTGGAAATGTGGAAAGGAAGGCCATCAAATGAAAGACTGCACTGAGAGACAGGCTAATTTTTTAGGGAGAATTTGGCCTTCCAGCAAAGGGAGGCCAGGAAATTTTCCTCAGAGCAGACCAGAACCATCAGCCCCACCAGCAGAAAACTTTGGGATGGGGGAAGAGATAGCCCCCTCCCTGAAACAGGAACAGAAAGACAGGGAACAACGTCCTCCTTCAATTTCCCTCAAATCACTCTTTGGCAACGACCCCTTGTCACAGTAAGAATAGGAGGACAGCTAAAAGAAGCTCTATTAGATACAGGAGCAGATGATACGGTATTAGAAGACATAAATTTGCCAGGAAAAGGGAAACCAAAAATGATAGGGGGAATTGGAGGTTTTATCAAGGTAAGACAGTATGATCAGATACTTATAGAAATTTGTGGAAAAAAGGCTATAGGTACGGTATTAATAGGGCCTACCCCTGTCAACATAATTGGAAGAAATATGTTGACTCAGCTTGGTTGTACTTTAAATTTTCCAATAAGTCCTATTGAAACTGTACCAGTAACATTAAAGCCAGGAATGGATGGCCCAAAGGTTAAACAATGGCCATTAACAGAAGAGAAAATAAAAGCATTAATAGACATTTGTAAGGAGATGGAGAGGGAAGGAAAAATTTCAAAAATTGGGCCTGAAAATCCATACAATACTCCAATATTTGTTATAAAGAAAAAAGATAGCACTAAGTGGAGGAAATTAGTAGATTTCAGGGAGCTCAATAAAAGAACTCAGGACTTTTGGGAGGTCCAATTAGGAATACCTCATCCCTCGGGGTTAAAAAAGAAAAAATCAGTAACAGTGCTAGATGTGGGGGATGCATACTTTTCAGTGCCCTTAGATGAAAGCTTCAGAAAGTATACTGCATTCACTATACCAAGTATAAACAATGAGACACCAGGGATCAGATATCAGTACAATGTACTCCCACAGGGATGGAAAGGATCACCATCAATATTCCAGAGTAGCATGACAAAAATCTTAGAGCCATTTAGATTAAAAAATCCAGAAATAGTTATTTATCAATACATGGATGACTTGTATGTAGGCTCTGATTTAGAAATAGGGCAACATAGAACAAAAATAGAGGAGTTAAGAGCTCATCTATTGAGCTGGGGATTTACTACACCAGACAAAAAGCATCAGAAAGAACCTCCATTTCTTTGGATGGGATATGAACTCCATCCTGACAAATGGACAGTCCAGCCTATAATGCTACCAGATAAAGACAGCTGGACTGTCAATGATATACAGAAATTAGTGGGAAAACTAAATTGGGCAAGTCAGATTTATCCAGGGATTAAAGTAAGGCAATTGTGTAAACTCCTCAGGGGAGCCAAAGCACTGACAGATATAGTGACACTGACTGAGGAAGCAGAATTAGAATTGGCAGAGAACAGAGAGATTCTAAAAGAACCGGTGCATGGAGTATATTATGACCCATCAAAAGATTTAGTAGCAGAAATACAGAAACAAGGACAAGACCAATGGACATATCAAATTTATCAGGAGCCATTTAAAAATCTAAAAACAGGAAAATATGCAAAAAAGGGGTCTGCTCACACTAATGATGTAAAACAATTAACAGCAGTGGTGCAAAAAGTGGCCACAGAAAGCATAGTAATATGGGGAAAGACTCCTAAATTTAGACTACCCATACAAAAAGAAACATGGGAAGCATGGTGGATGGAGTACTGGCAGGCTACCTGGATTCCTGAATGGGAGTTTGTCAATACCCCTCCTCTAGTAAAACTATGGTACCAGTTGGAGAAAGAACCCATAGTAGGAGCAGAGACTTTCTATGTAGATGGGGCAGCTAACAGGGAGACTAAGATAGGAAAAGCAGGGTATGTTACTGACAGAGGAAGACAAAAGGTTGTTCCTCTAACTGAGACAACAAATCAAAAGACTGAATTACATGCAATCCATCTAGCTTTGCAGGATTCAGGATCAGAAGTAAATATAGTAACAGACTCACAATATGCATTAGGAATTATTCAGGCACAACCAGACAGGAGTGAATCAGGGATAGTCAATAAAATAATAGAGAAACTAATAGAAAAAGAAAGAGTCTACCTGTCATGGGTACCAGCGCACAAGGGGATTGGAGGAAATGAACAAGTAGATAAATTAGTCAGTAATGGAATCAGGAGGGTGTTATTTTTAGAAGGGATAGATAAGGCTCAAGAAGAACATGAAAAATATCACAGCAATTGGAAAGCAATGGCTAGTGATTTTAATCTGCCACCTATAGTAGCAAAGGAAATAGTAGCCAGCTGTGATAAATGTCAATTAAAAGGGAAAGCTATGCATGGACAGGTAGACTGTAGTCCAGGGATATGGCAATTAGATTGCACACATCTAGAAGGAAAAATAATCATGGTAGCAGTCCATGTAGCCAGTGGCTATATAGAAGCAGAAGTTATCCCAGCAGAAACAGGACAGGAGACAGCATACTTTCTGCTAAAATTAGCAGGAAGATGGCCAGTAAAAGTAGTACACACAGATAATGGCCCCAATTTCACCAGCAGTGCAGTTAAGGCTGCCTGTTGGTGGGCAAATATCCAACAGGAATTTGGGATTCCCTACAATCCCCAAAGTCAAGGAGTAGTGGAGTCTATGAATAAGGAATTAAAGAAAATCATAGGGCAGGTAAGAGAGCAAGCTGAACACCTTAAGACAGCAGTACAAATGGCAGTATTCATTCACAATTTTAAAAGAAAAGGGGGGATTGGGGGGTACAGTGCAGGGGAAAGAATAATAGACATAATAGCAACAGACATACAAACTAAAGAATTACAAAAACAAATTATAAAAATTCAAAATTTTCGGGTTTATTACAGAGACAGCAGAGATCCAATTTGGAAAGGACCAGCAAAACTACTCTGGAAAGGTGAAGGGGCAGTGGTAATACAGGACAATAACGATATAAAAGTAGTACCAAGAAGAAAAGCAAAGATCATTAGGGATTATGGAAAACAGATGGCAGGTGATGATTGTGTGGCAAGTAGACAGGATGAGGATTAGAACATGGAACAGTTTAGTAAAACATCATATGTATGTCTCAAAGAAAGCTAGAGAGTGGTTTTATAGACATCACTATGAAAGCAGAAATCCAAGAGTAAGTTCAGAAGTACACATCCCACTAGGGGATGCTAGGCTAGTAGTAAAAACATATTGGGGTCTGCATACAGGAGAAAAAGACTGGCACTTGGGTCATGGGGTCTCCATAGAATGGAGACAGGAAAGGTATAGCACACAAATAGACCCTGACCTGGCGGACCAACTAATTCATCTGTATTATTTTGACTGTTTTTCAGAATCTGCCATAAGGAAAGCCATAGTAGGACACATAGTTAGCCCTAGGTGTAACTATCCAGCAGGACACAACAAGGTAGGATCTCTACAATACTTGGCACTGAAAGCATTAGTAACACCAACAAGGGAAAGGCCACCTTTGCCTAGTGTTAGGAAACTAACAGAGGATAGATGGAACAAGCCCCAGAAGACCAGGGGCCGCAGAGGGAACCACACAATGAATGGATGTTAGAACTGTTAGAAGATATTAAGCATGAAGCTGTCAGACATTTTCCAAGGCCGTGGCTCCATGGATTAGGACAACATATCTATAACACCTATGGGGATACTTGGGAAGGGGTTGAAGCTATAATAAGAACTTTGCAACAACTACTGTTTGTTCATTTCAGAATTGGGTGCCAACATAGCAGAATAGGCATTGTGCAAAGGAGAAGAGTCAGGAATGGATCCAGTAGATCCTAACCTAGAGCCCTGGAATCATCCGGGGAGTCAGCCTAAAACTGCTTGTAGCAATTGTTACTGTAAAAAGTGTTGCTGGCATTGCCAAGTTTGCTTTCTAAAAAAAGGCTTAGGCATCTCCTATGGCAGGAAGAAGCGGAGACCCAGACGAGAAACTCCTCACAGCAGTAAGGATCATCAAAATCTTATATCAAAGCAGTAAGTACTAAATAAATGTAATGACACCTTTAGAAATCTATGCAATAGTAGCATTAGTAGTAGTGTTTGTCATAGCAATAGTTGTGTGGACTATAGTAGGTATAGAATATAGGAAATTACTAAAACAAAGAAAAATAGACAGGTTAATTGAGAGAATAAGAGAAAGAGCAGAAGATAGTGGCAATGAAAGCGAGGGGGATGCAGAGGAATTATCAACACTTATGGAGGTGGGGAACCATGCTCTTTTGGATGATAATAATGTGTAAGGCTGCAGGAAACTTGTGGGTCACGGTATACTATGGGGTACCTGTGTGGAGAGATGCAGAGACCACCTTATTTTGTGCATCAGATGCTAAAGCATATGATAAAGAAGTACACAATGTCTGGGCTACACATGCCTGTGTACCCACAGACCCTGACCCACAAGAAATGGCTTTGGAAAATGTGACAGAAAATTTTGACATGTGGAAAAATAACATGGTAGAACAAATGCAAACAGATATAATCAGTCTCTGGGACCAAAGCCTACAACCATGTGTAAAGTTAACCCCTCTCTGCGTTACTTTAAATTGTGCTGAACCCAACAGCACTAGCTCTAACAACAGTAGCGTTAACAGCAACAGCAGCGATAGTTTGTTTGAAGAAATGAAAAACTGCACTTTCAACATGACCACAGAACTAAGAGATAAAAGGAAAACTGTACATTCACTTTTTTATAAACTTGATATAGTATCAACTGATAGTAATGGTAGTGGGCAGTATAGACTAATAAATTGCAATACATCAACCATGACACAGGCCTGTCCTAAGGTAACCTTTGAGCCAATTCCTATACATTATTGTGCCCCAGCGGGTTTTGCGATTCTAAAGTGCAAGGATACAAATTTTACTGGAACAGGGCCATGCAAGAATGTCAGCACAGTACAATGCACACATGGAATCAAGCCAGTAGTATCAACCCAACTGCTGTTAAATGGCAGTCTAGCAGAGAAAGAGGTAATGCTTAGATCTGAAAATATCACAGACAATGGCAAAATCATAATAGTACAGCTTACTGAGCCTGTAAACATCACTTGTATCAGACCTGGCAACAATACAAGAACAAGTATACGTATAGGACCAGGACAAACCTTCTATGCAACAGGTGATGTAATAGGGGACATAAGAAAAGCATATTGTAATGTCAGCAGAGCAGCATGGAATAGCACTTTACAAAAGATAAGTACACAATTAAGAAAATACTTTAATAACAAAACAATAATCTTTAAGAACTCCCCAGGAGGGGATTTAGAAGTTACAACACATAGTTTCAATTGTGGAGGAGAATTTTTCTATTGCAATACAACAGACCTGTTCAATAGCACTTGGGACAATGGCACAAATGTCACAAAGGCCAATGGAACTATAACTCTACCATGCAGAATAAAGCAAATTATAAATATGTGGCAGAGAATAGGACAAGCAATGTATGCCCCTCCTATCAAAGGAAGTATAAGGTGTGAATCAAACATTACAGGACTACTACTAACAAGAGATGGTGGAGGTGGAACTAATAGCAGCAATGAGACCTTCAGACCTATAGGAGGAAATATGAAGGACAATTGGAGAAGTGAACTATATAAGTATAAAGTAGTAAAAATTGAACCAATAGGAGTAGCACCTACCAGGGCAAAGAGAAGAGTGGTGGAGAGAGAAAAAAGAGCAATTGGACTGGGAGCTGCCTTCCTTGGGTTCTTAGGAGCAGCAGGAAGTACTATGGGCGCGGCGTCAATGACGCTGACGGTACAGGCCAGACAATTGTTGTCTGGCATAGTGCAACAGCAAAGCAATTTGCTGAGGGCTATAGAGGCTCAGCAGCATCTGCTGAAACTCACGGTCTGGGGCATTAAACAGCTCCAGGCAAGAGTCCTGGCTGTGGAAAGATACCTAAAGGATCAGCAGCTCCTAGGAATTTGGGGTTGCTCTGGAAAACTCATCTGCACCACTAATGTGCCCTGGAACTCTAGTTGGAGTAACAAATCTCAGAGTGAGATATGGGATAACATGACCTGGATGCAATGGGACAAGGAAGTTATCAATTACACAGACATAATATATGATCTAATTGAAAAATCGCAAAACCAGCAGGAAAGGAATGAACAAGATTTATTGGCATTGGATAAGTGGGCAGGTCTGTGGAGTTGGTTTGACATATCAAATTGGTTATGGTATATAAAAATATTTATAATAATAGTAGGAGGCTTAATAGGATTAAGAATAGTTTTTGCTGTGCTTTCTATAATAAATAGAGCCAGGCAGGGATACTCACCCTTGTCATTGCAGACCCTTACCCCGCACCCAGAGGGACCAGACAGGCCCGGAAGAATCAACGAAGAAGGTGGAGAGCAAGGCAGAGACAGATCGATTCGATTGGCGAGCGGATTCTTAGCACTTGCCTGGGACGATCTGCGGAGCCTGTGTCTCTTCAGCTACCACCGATTGAGAGACTTCATCTCGATTGCAGCGAGGACTGTGGAACTTCTGGGACGCAGCAGTCTCAAGGGACTGAGACTGGGGTGGGAGGGCCTCAAGTATCTGGGGAATCTTCTAGGATATTGGGGTCAGGAACTAAAGAGTAGTACTATCAATCTAATAGATACCATAGCAATAGCAGTAGCTAGGGGGACAGATAGGGTTATAGAAATAGGGCAAAGACTTTGTAGAGCCATTCGTAACATACCTAGGAGAATCAGACAGGGCGCAGAAAGGGCTTTGCAATAACATGGGGGGCAAATGGTCAAAAAGTAGTATAGTGGGATGGCCTCAGGTTAGGGAAAGAATAAGACGAGCTCCTGCTCCAGCAGCAAGAGGAGTAGGACCAGTATCTCAAGATTTGGATAAGCATGGAGCAGTCACAAGCAGTAATACAGCAGCCAATAATGCTGATTGCGCCTGGCTGGAGGCGCAAGAGGAAGAGGAGGTAGGCTTTCCAGTCAGGCCGCAGGTACCTTTGAGACCGATGACATATAAGGGAGCTATCGATCTCAGCCACTTTTTAAAAGAAAAGGGGGGACTGGATGGGCTAATTTACTCCAAGAAAAGACAAGACATCCTTGATCTGTGGGTCTATCATACACAAGGCTACTTCCCTGATTGGCAGAATTATACCCCAGGGCCAGGGATTAGATTCCCACTAACATTTGGGTGGTGCTACAAGCTAGTACCAGTTGACCCAGAGGAAGTAGAAGAGGCCACAGAGGGAGAGAACAACAGCCTATTACACCCTATATGCCAACACGGAATGGATGATGAGGAAAAAGAAGTGTTAATGTGGAAGTTTGACAGTCGCCTGGCTCTAACACACAGAGCCCGAGAGCTACATCCGGAGTTCTACAAAGACTGCTGACACAGACTGCTGACATGAAGTTGCTGACAGGGACTTTCCGCGGGGACTTTCCAGGGGAGGTGTGGTTTGGGCGAAGTTGGGGAGTGGCTAACCCTCAGATGCTGCATATAAGCAGCTGCTTTTCGCCTGTACTGGGTCTCTCTGGTTAGACCAGATCGAGCCTGGGAGCTCTCTGGCTAGCTAGGGAACCCACTGCT
>A1.KE.99.KNH1135_AF457065_H.BE.93.VI991_AF190127
GCGAGAGCGTCAATATTAAGTGGGGGAAAATTAGATAAATGGGAGAAAATTCGGTTAAGGCCAGGGGGGAAAAAACATTATAGACTAAAACATCTAGTATGGGCAAGCAGGGAGCTGGAAAGATTCGCACTTAACCCTGGCCTTTTAGAAACAGCGGAAGGATGTCAACAAATAATAGAACAGTTACAATCAGCTCTCAGGACAGGGACAGAAGAACTTAGATCATTATATAATACAGTAGCAACCCTCTATTGCGTACATCGACAGATAGATGTAAGAGACACCAAGGAAGCTCTAGATAAAATAGAGGAAATACAAAATAAGAGCAAGCAAAAGACACAACAGGCAGCAGCTGACACAGGAAGCAGCAGCAAGGTCAGCCAAAATTACCCTATAGTGCAAAATGCACAAGGGCAAATGACATACCAGACCATGTCACCTAGAACTTTAAATGCATGGGTGAAAGTAATAGAAGAAAAGGCTTTCAGCCCAGAGGTAATACCCATGTTTTCAGCATTATCAGAAGGAGCCACCCCACAAGATTTAAATATGATGCTGAACATAGTGGGGGGACACCAGGCAGCTATGCAAATGTTAAAGGACACCATCAATGAGGAAGCTGCAGAATGGGACAGGTTACATCCAATCCATGCAGGCCCTGTTGCACCAGGCCAGATGAGAGAACCAAGGGGAAGTGACATAGCAGGAACTACTAGTACCCCTCAAGAACAACTACAATGGATGACAAGCAACCCACCTATCCCAGTGGGAGACATCTATAAAAGATGGATAATCTTGGGATTAAATAAAATAGTAAGAATGTATAGCCCTGTTAGCATTTTGGATGTAAAACAAGGGCCAAAAGAACCCTTCAGAGACTATGTAGATAGGTTCTTTAAAATTCTCAGAGCTGAGCAAGCTACACAGGATGTAAAAAATTGGATGACAGAAACATTACTAATCCAAAATGCAAACCCAGATTGTAAGTCCATTTTAAGAGCATTAGGACCAGGGGCTTCATTAGAAGAAATGATGACAGCATGCCAGGGAGTGGGAGGACCCAGCCATAAAGCAAGGGTTTTAGCTGAGGCAATGAGTCAAGCACAACAAACAAACATAATGATGCAGAGAGGCAATTTTAGGGGCCAGAAAAGGATCAAGTGTTTTAACTGTGGCAAAGAAGGACACATAGCCAGAAATTGCAGGGCCCCTAGAAAAAAGGGCTGTTGGAAATGTGGACAGGAAGGACACCAGATGAAAGACTGCACTGAGAGACAGGCTAATTTTTTAGGGAAAATTTGGCCTCTCAACAAGGGGAGGCCAGGAAATTTTCCCCAGAGCAGAACGGAGCCCACAGCTCCACCAGCAGAGATCTTGGGGATGGGGGAAGAGATAACCTCCCCTCCCAAACAGGAGCAGAAAGACAAGGAACAAGCCTCAGTTTCCCTCAAATCACTCTTTGGCAACGACCTATTGTTACAGTAAAAATAGAGGGACAGCTAAGAGAAGCTCTATTAGATACAGGAGCAGATGATACAGTATTAGAAGATATAAATTTGTCAGGAAAGTGGAAACCAAGAATGATAGGGGGAATTGGGGGTTTTATTAAAGTAAAACAGTATGAACAGATATCTATAGAAATTTGTGGAAAAAAGGCTATAGGTACAGTATTAGTAGGACCTACACCTGTCAACATAATTGGAAGAAATATGTTGACCCAGATTGGTTGTACTTTAAATTTCCCAATTAGCCCTATTGAGACTGTACCAGTAAAATTAAAGCCAGGGATGGATGGCCCAAAAGTTAAACAATGGCCATTGACAGAAGAAAAAATAAAAGCATTAACAGAAATTTGTGCAGAGATGGAGAAGGAAGGAAAAATTGAAAAAATTGGGCCTGAAAATCCATACAATACTCCAATATTTGCTATAAAGAAAAAAGACAGCACTAAATGGAGGAAATTAGTAGATTTCAGAGAGCTCAATAAAAGAACTCAAGATTTCTGGGAAGTTCAATTAGGGATACCGCACCCAGCGGGCCTAAAAAAGAAAAAATCAGTAACAGTACTAGATGTGGGGGACGCATATTTCTCAGTTCCTTTAGATGAAAGCTTTAGAAAGTATACTGCGTTCACCATACCTAGTACAAACAATGAGACACCAGGAATCAGGTATCAGTACAATGTGCTTCCACAGGGTTGGAAAGGATCACCTGCAATATTCCAGAGCAGTATGACAAAAATCTTAGAGCCCTTTAGATTAAAAAATCCAGAAATAATTATCTATCAATACATGGATGACTTGTATGTAGGATCTGATTTAGAAATAGGGCAACATAGAGCAAAAATAGAAGAGTTGAGAGCTCATCTATTGAGCTGGGGATTTACTACCCCAGACAAGAAGCATCAGAAAGAACCACCATTTCTTTGGATGGGATATGAACTCCATCCTGACAAGTGGACAGTCCAGCCTATAATACTGCCAGAAAAAGAAAGCTGGACTGTCAATGATATACAGAAATTAGTGGGAAAACTAAATTGGGCAAGTCAAATTTATCCAGGAATTCAAGTAAGGCAATTGTGTAAGCTCCTCAGGGGAACCAAAGCACTAACAGACATAGTAACACTGACTGAGGAAGCAGAATTAGAATTAGCAGAGAACAGGGAGATTTTAAAAGACCCTGTGCATGGAGTATACTATGACCCATCAAAAGAATTAATAGCAGAAATACAGAAACAAGGGCAAGAACAGTGGACATACCAAATTTATCAAGAGCCATTTAAAAATCTAAAAACAGGAAAATATGCAAGAAAAAGGTCTACTCACACTAATGATGTGAGACAATTAGCAGAAGTGGTGCAAAAAGTGGTCATGGAAAGCATAGTAATATGGGGAAGGACTCCTAAATTTAAATTACCCATACAAAGAGAAACATGGGACACATGGTGGATGGACTATTGGCAGGCTACCTGGATTCCTGAATGGGAGTTTGTCAATACCCCTCCCCTAGTAAAATTATGGTACCAGTTAGAAAAAGACCCCATAGAAGGAGCAGAGACTTTCTATGTAGATGGGGCAGCCAATAGGGAGACTAAGCTAGGAAAAGCAGGGTATGTCACTGATAGAGGGAGACAAAAGGTTGTTTCCCTAACTGAGACAACAAATCAGAAGACTGAACTACATGCAATCTATCTAGCACTGCAGGATTCAGGATCAGAGGTAAACATAGTAACAGACTCACAGTATGCATTAGGAATCATTCAGGCACAGCCAGACAAAAGTGACTCAGAGTTAGTCAATCAAATAATAGAGAGGCTAATAGGAAAGGACAAAGTCTACCTGTCATGGGTACCAGCACACAAGGGGATTGGAGGAAATGAACAAGTAGATAAATTAGTCAGCTCTGGAATCAGGAAGATACTGTTTTTAGATGGGATAGATAAAGCTCAAGAAGAACATGAAAGATATCACAGCAATTGGAGAACAATGGCTAGTGACTTTAATCTGCCACCTATAGTAGCAAAGGAAATAGTTGCCAGCTGTGATAAATGTCAACTAAAAGGGGAAGCCATGCATGGACAAGTAGACTGTAGTCCAGGGATATGGCAGTTAGATTGCACACATCTGGAAGGAAAAGTAATTCTGGTAGCAGTCCATGTAGCCAGTGGCTACATAGAAGCAGAAGTTATCCCAGCAGAGACAGGACAGGAGACAGCATACTTTCTGCTAAAATTAGCAGGAAGGTGGCCAGTAAAAGTGGTACACACAGACAATGGCAGCAATTTCACCAGCGCTGCAGTTAAAGCAGCCTGTTGGTGGGCAGGTATCCAACAGGAATTTGGAATTCCCTACAATCCCCAGAGTCAAGGAGTAGTAGAATCTATGAATAAGGAATTAAAGAAAATCATAGGACAAGTAAGAGAGCAAGCTGAACACCTTAAAACAGCAGTACAAATGGCAGTATTCATTCACAATTTTAAAAGAAAAGGGGGGATTGGGGGGTACAGTGCAGGGGAAAGAATAATAGACATAATAGCAACAGACATACAAACTAAAGAATTACAAAAACAAATTACAAAAATTCAAAATTTTCGGGTTTATTACAGGGACAGCAGAGATCCAATTTGGAAAGGACCAGCAAAACTACTCTGGAAAGGTGAAGGGGCAGTAGTAATACAGGACAATAGTGATATAAAAGTAGTACCAAGAAGAAAAGCAAAAATCATTAGAGATTATGGAAAACAGATGGCAGGTGATGATTGTGTGGCAGGTAGACAGGATGAGGATTAGAGCATGGCACAGTCTAGTAAAACATCACATGCATATCTCAAAGAAAGCTAGAAAATGGCTTTACAGACATCACTATGAAAGCAGGCATCCAAAAGTAAGTTCAGAAGTACACATCCCACTAGGGGATGCTAGATTAGTAGTAAGAACATATTGGGGTCTGCAGACAGGAGAAAAAGATTGGCACTTGGGTCATGGGGTCTCCATAGAATGGAGGCTAAAAAGATATAGCACACAAGTAGATCCTGACCTGGCAGATCAACTAATCCACCTGCATTATTTTAACTGTTTTTCAGACTCTGCCATAAGGAANGCCATATTAGGACAAGTAGTTAGCCCTAGTTGTGAATATCAAGCAGGACATAACAAGGTAGGATCTCTACAATATTTGGCACTGAAAGCATTAGTAACACCACAAAGGAGAAAGCCACCTTTGCCTAGTGTTAAGAAATTAACAGAGGATAGATGGAACAAGCCCCACAAGACCAGGGACCCCCGAGGGAGCCACACAATGAATGGACATTAGAATTGTTAGAAGAGCTTAAGAATGAAGCTGTTAGGCATTTTCCTAGGCAATGGCTCCATGGATTAGGACAATATGTATATAACACCTATGGGGATACTTGGGAAGGAGTTGAAGCCATAATAAGAATGTTGCAACAATTGCTGTTTGTTCATTTCAGAATTGGGTGCCAACATAGCAGAATAGGCATTATTCGGGGGAGAAGAGTCAGGGATGGATCCGGTAGATCCTAACCTAGAGCCCTGGAACCATCCGGGAAGTCAGCCTACAACTCCTTGTAACAAGTGCTACTGCAAAAAGTGTTGCTATCATTGTCCAGTTTGCTTTCTGAACAAAGGCTTAGGCATCTCCTATGGCAGGAAGAAGCGGAGACAGCGACGAGGAACTCCTCAAAGCAGTAAGGATCATCAAAATCCTGTACCAAAGCAGTGAGTATTAGTAGTTAATATATGTAATGCAGCCTTTGCAAATCTGTGCAATAGTAGGATTGGTAGTTGTGCTAATCATAGCAATAGTGGTGTGGACTATAGTCGGCATAGAATATAAGAGATTGCTAAAGCAAAGAAAAATAGACAGGTTAATTGAGAGGATAAGAGAAAGAGCAGAAGACAGTGGCAATGAAAGTGAAGGGGACACAGAGGAACTTTCAGCACTTATTGAGATGGGGAATTATGGTGTTGGGGATGATAATAATCTGTAGTGCTACAGAACAATTGTGGGTTACTGTCTACTATGGGGTGCCTGTGTGGAAAGATGCAGAGACCACCCTATTTTGTGCATCAGATGCTAAAGCACATGAGACAGAAGTACATAATGTCTGGGCTACGCATGCCTGTGTACCCACAGACCCCAACCCACAAGAAATAGAATTGAAAAATGTAACAGAAGAGTTTAACATGTGGAAAAATAACATGGTAGAACAGATGCATGCAGATATAATCAGTCTATGGGACCAAAGCCTAAAGCCATGTGTAAAGTTAACCCCTCTCTGTGTTACTCTAAATTGTAGTAACTTTAGTGTCACTAATAATAGCACCAATAATAGCACCAATACTACCATCATTGACAGTAACATGGAAGGAGAAATAAAAAACTGCTCTTACAATGTGACCACAGTAATAAGGGATGAGAAACAGAAAGTATACTCGCTTTTTTATAGAACTGATGTAGTAGAAATTGAGAATAATAGTAGTCAGTATAGATTAATAAATTGTAATACCTCAGCCATTACACAAGCTTGTCCAAAGGTAACCTTTGAGCCAATTCCCATACATTATTGTGCTCCAGCTGGTTTTGCGATTCTAAAGTGTAGGAATGAGACGTTCAATGGAACAGGACCATGCAATAATGTCAGCACAGTACAATGCACACATGGAATCAGGCCAGTAGTATCAACTCAGCTGCTGTTAAATGGCAGTCTAGCAGAAAAAGAAATAATGATTAGATCTGAAAATATCTCAGACAATGCCAAAAGCATACTAGTACAATTGACAAAGCCTGTAATAATTAATTGTACTAGACCTAACAACAACACAAGAAAAAGTATACATATAGGACCAGGACAAGCATTCTATGCAACAGGTGACATAATAGGGGATATAAGACAAGCATATTGTACTGTCAATAAAACAGAATGGAATGAAACTTTGCACAATGTGACCACTCAATTAAAAACATACTTTAACAAAACAATAGTCTTTACTAGCCACTCAGGAGGGGATCTAGAGATTACAACACATACTTTTAATTGTGGAGGAGAATTTTTCTATTGCAACACATCAGGCCTGTTTAATAGCACTTGGGATGATAACATTAAGAATGATACTAACAGCACACAGGGGTCAAATAGCACGGAGATAATTCTCCCATGCAAAATAAAGCAAATTGTAAGGATGTGGCAGAGAACAGGACAAGCAATGTATGCTCCTCCAATCCCAGGAGTAATAAGGTGTGTATCAAACATTACAGGACTAATACTAACAAGAGATGGTGGGAATACTAGCAGCATAAATGAAACCTTTAGACCTGGAGGAGGAGATATGAGGGACAACTGGAGAAGTGAATTATATAAGTATAAAGTAGTAAAAATTGAACCACTAGGAGTGGCACCCACCAAGGCAAGGAGAAGAGTGGTGGAGAGAGAAAAAAGAGCAGTTGGAATAGGAGCTGTCCTCTTTGGTTTCTTAGGAGCAGCCGGAAGCACTATGGGCGCGGCGTCAATAACGCTGACGGTACAGGCCAGACAATTATTGTCTGGCATAGTGCAACAGCAAAGCAATTTGCTGAGGGCTATAGAGGCTCAACAGCAAATGTTGAGACTCACGGTCTGGGGCATTAAACAGCTCCAGGCAAGAGTCCTGGCTGTGGAAAGATACCTAAGGGATCAACAGCTCCTAGGACTTTGGGGCTGCTCTGGAAAACTCATCTGCACCACTACTGTGCCCTGGAACTCTAGCTGGAGTAATAAATCACAGAATGAGATATGGAACAACATGACCTGGCTGCAATGGGATAAAGAAATTAGCAATTACACACAGATAATATATGACCTAATTGAAGAATCGCAGAACCAGCAGGAAAAGAATGAACAAGACTTATTGGCATTGGACAAGTGGGCAAATCTGTGGAGTTGGTTTGACATATCAAGTTGGCTGTGGTATATAAGAATATTTATAATGATAGTAGGAGGCTTAATAGGATTAAGAATAGTTTTTGCAGTGCTTTCTATAATAAAGAGAGTTAGGCAGGGATACTCACCTTTATCATTTCAGATCCATACCCCAAACCCAGGGGAACCCGACAGGCCCGGAGGAATCGAAGAAGAAGGTGGAAAGCAAGACAGAAGCAGATCGATACGCTTAGTGAGCGGATTCTTAGCACTTGCCTGGGACGACCTACGGAGCCTGTGCCTTTGGAGCTACCACCGATTGAGAGACTTCATCTTGATTGCCGCGAGGACTGTGGAACTTCTGGGACACAGCAGTCTCAAGGGGTTGAGACTGGGGTGGGAGGGCCTCAAGTATCTGTGGAATCTCCTGGTGTATTGGAGTCAGGAACTGAAGAGTAGTGCTATTAATTTGTTTGATACCTTAGCAATAACAGTAGCTGGCTGGACAGATAGGGTTATAGAAGTAGGACAAAGACTTTGTAGAGCTCTTTTACACATACCTAGAAGAATCAGACAGGGCGCTGAAAGAGCTTTGCTATAACATGGGGGGCATATGGTCAAAAAGAAGCACAAGGGGATGGTCTGAGGTTAGGGAAAGAATAAGACAAACTCCAACTCCTCCAGCAGCAAGAGGAGTAGGAGCAGTATCTCAAGATTTAGCTAGGCATGGAGCAGTCACAAGCAGCAATGTAAATCATCCTAGTTGCGCCTGGCTGGAAGCGCAAGAGGATGAGGATGTAGGCTTTCCAGTGAGGCCACAAGTACCTTTAAGACCAATGACTTACAAGGGAGCGTTTGACCTCAGCCACTTTTTAAAAGAAAAGGGGGGACTGGATGGGTTAATTTACTCTAGGAAGAGAAAAGAGATCCTTGATTTGTGGGTTTACCACACACAAGGCTTCTTCCCTGATTGGCAGGAATACACACCAGGGCCAGGGATCAGGTACCCACTAACATTTGGATGGTGCTTCAAGCTAGTACCAGTGGAACCAGAAGAAGTGGAGAAGGCTACTGAGGGAGAGGACAACGTTCTATTACACCCTATGAACCAACATGGAATGGATGATGAAGAGAAAGAAGTGTTAATGTGGAAGTTTGACAGCCACCTGGCACTAAAACACAGAGCCCTTGAGCTGCATCCGGAGTTCTATAAAGACTGCTGACACAGAAGTTGCTGACAGGGACTTTCCGCTGGGGACTTTCCAGGGGAGGTGTGGTTTGGGCGGAGTTGGGGAGTGGCTAACCCTCAGATGCTGCATATAAGCAGCTGCTTCTCGCTTGTACTGGGTCTCTCTTGGTAGACCAGATCGAGCCTGGGAGCTCTCTGGCTGCAAGGGAACCCACTGCT
>A1.KE.97.ML013_2_AY322185_J.SE.93.SE7887_AF082394
CTTGAGTGCTTCAAGTAGTGTGTGCCCGTCTGTTGTTTGACTCTGGTAACTAGAGATCCCTCAGACCACTCTAGACGGTGTAAAAATCTCTAGCAGTGGCGCCCGAACAGGGACTCGAAAGCGAAAGTTCCAGAGAAGTTCTCTCGACGCAGGACTCGGCTTGCTGAGGTGCACACAGCAAGAAGCGAGAGCGGCGACTGGTGAGTACGCCAAAAATTTTTTGACTAGCGGAGGCTAGAAGGAGAGAGATGGGTGCGAGAGCGTCAGTATTAAGTGGGGGAAAGTTAGATTCGTGGGAAAAAATTCGGTTAAGGCCAGGGGGAAAGAAAAAATATAGACTGAAACATTTAGTATGGGCAAGCAGGGAGCTGGAAAGATTCGCACTTAACCCTAGCCTTTTAGAAACAGCAGAGGGATGTCAACAAGCAATGGAACAATTACAACCAGCTCTCAAGACAGGGACAGAGGAAATTAAATCATTATTTAATACAGTAGCAACCCTCTATTGCGTACATCAAAGGATAGAGGTAAAAGACACCAAGGAAGCTTTAGATAAAATAGAGGAAATACAAAGAAAGAGCAAGCAAAAGACACAACAGGCAGCAGCTGACACAGGAAACAGCAGTCAGGTCAGCCAAAATTACCCTATAGTGCAAAATGCACAAGGGCAAATGATACATCAGTCCTTGTCACCTAGGACTTTGAATGCATGGGTAAAAGTAATAGAAGAAAAGGCTTTCAGCCCAGAAGTAATACCCATGTTCTCAGCATTATCAGAAGGAGCCACCCCACAAGATTTAAATATGATGCTGAACATAGTGGGGGGACACCAGGCAGCTATGCAAATGTTAAAAGATACCATCAATGAGGAAGCTGCAGAATGGGACAGGTTACATCCAGTACATGCAGGGCCTATTCCACCAGGCCAGATGAGAGAACCAAGGGGAAGTGACATAGCAGGAACTACTAGTACCCCTCAAGAACAAATAGGATGGATGACAAGCAACCCACCTATCCCAGTGGGAGACATCTATAAAAGATGGATAATCCTGGGATTAAATAAAATAGTAAGAATGTATAGCCCTGTTAGCATTTTGGATATAAAACAAGGGCCAAAGGAACCCTTCAGAGATTATGTAGATAGGTTCTTTAAAACTCTCAGAGCTGAGCAAGCTACACAGGAGGTAAAAGGTTGGATGACTGAAACATTACTGGTCCAAAATGCAAATCCAGATTGTAAGACCATTTTAAGAGCATTGGGAGCAGGGGCTACATTAGAAGAAATGATGACAGCATGCCAGGGAGTGGGAGGACCTAGCCATAAAGCAAGGATTTTGGCTGAGGCAATGAGCCAAGTACAACAGACAAACATAATGATGCAGAGGGGCAATTTCAGGGGTCAAAAAAGGATTAAGTGTTTCAACTGTGGCAAAGAAGGACACCTAGCCAGAAATTGTAGGGCCCCTAGGAAAAAGGGCTGTTGGAAATGTGGGAAGGAGGGACACCAAATGAAAGAATGCACTGAAAGACAGGCTAATTTTTTAGGGAAAATCTGGCCTCCCAGCAAGGGGAGGCCAGGGAATTTTCCTCAGAGCAGACCGGAGCCAACAGCCCCACCAGCAGAGCTCTTTGGGATGGGGGAAGAGATGACCTCCCCTCCGAAGCAGGAGCAGAAAGACAGGGAACAGGCCCCACCCTTAGTTTCCCTCAAATCACTCTTTGGCAACGACCCGTTGTCACAGTAAAAGTAGGAGGACAGCTAAAAGAAGCTCTATTAGATACAGGAGCAGATGATACAGTATTAGAAGATATAAATTTGCCAGGAAAATGGAAGCCAAGAATGATAGGGGGAATTGGAGGTTTCATCAAAGTAAAACAGTATGATCAGATACTTATAGAAATTTGTGGAAAAAAGGCTATAGGTACAGTATTAGTAGGACCTACACCTGTCAACATAATTGGAAGAAACATGTTGACCCAGATTGGTTGTACTTTAAATTTCCCAATTAGTCCTATTGAGACTGTACCAGTAGAATTAAAGCCAGGAATGGATGGCCCAAAGGTTAAACAATGGCCATTGACAGAAGAAAAAATAAAAGCATTAACAGAAATTTGTACAGAGATGGAAAAGGAAGGAAAAATTTCAAAAATTGGGCCAGAAAATCCATACAATACTCCAATATTTGCAATAAAGAAAAAGGATAGCACTAAATGGAGGAAATTAGTAGATTTCAGAGAGCTCAATAAAAGAACACAAGACTTTTGGGAAGTCCAATTAGGGATACCGCATCCAGCGGGCCTAAAAAAGAAAAAATCAGTAACAGTACTAGATGTGGGGGACGCATATTTTTCAGTTCCTTTACATGAAAGCTTTAGAAAGTATACTGCATTCACCATACCTAGTACAAACAATGAGACACCAGGAATCAGGTATCAGTACAATGTGCTTCCACAGGGATGGAAAGGATCACCAGCAATATTCCAGAGTAGCATGACAAAAATCTTAGAGCCCTTTAGAGCAAAAAATCCAGAAATAATTATCTATCAATACATGGATGACTTGTATGTAGGATCTGATTTAGAAATAGGGCAACATAGAGCAAAAATAGAGGAGTTAAGAGCTCATCTATTGAGCTGGGGATTTACTACACCAGACAAAAAGCATCAGAAAGAACCTCCATTCCTTTGGATGGGATATGAGCTCCATCCTGATAAGTGGACAGTCCAGCCTATAGTGCTGCCAGAAAAAGAACACTGGGCTGTCAATGATATACAGAAATTAGTGGGGAAACTAAATTGGGCAAGTCAAATTTATGCAGGGATTAAAGTAAAGCAATTGTGTAAACTCCTCAGGGGAGCCAAAGCACTAACAGATATAGTAACATTGACTGAGGAAGCAGAATTAGAATTGGCAGAGAACAGGGAGATTCTAAAAGACCCTGTGCATGGGGTATATTATGACCCATCAAAAGACTTAATAGCAGAAATACAGAAACAAGGGCAAGACCAATGGACATATCAAATTTATCAGGAGCCATTTAAGAATTTAAAAACAGGAAAATATGCAAGAAAAAGGTCTGCTCACACTAATGATGTAAGACAATTAGCAGAAGTGGTGCAAAAGGTGGTCATGGAAAGCATAGTAATATGGGGAAAGACTCCTAAATTTAAACTACCCATACAAAAAGAAACATGGGAAACATGGTGGATGGACTATTGGCAGGCTACCTGGATTCCTGAATGGGAGTTTGTCAATACCCCTCCTCTAGTAAAATTGTGGTACCAGTTAGAGAAAGACCCCATAATGGGAGCAGAGACTTTCTATGTAGATGGGGCAGCCAATAGGGAGACTAAGCTAGGAAAAGCAGGGTATGTCACTGATAGGGGAAGACAAAAGGTTGTTTCCCTAACTGAGACAACAAATCAAAAGACTGAACTACATGCAATCTATCTAGCCTTGCAGGATTCAGGATCAGAAGTAAATATAGTAACAGACTCACAGTATGCATTAGGAATCATTCAGGCACAACCAGACAAAAGTGAATCAGAATTAGTTAATCAAATAATAGAGAAGCTAATAGGAAAGGATAAAGTCTACCTGTCATGGGTACCAGCACACAAGGGGATTGGAGGAAATGAACAAGTAGATAAATTAGTCAGCTCTGGAATCAGGAAGATACTATTTTTAGATGGAATAGATAAGGCTCAAGAAGAACATGAAAGATATCACAGCAATTGGAGAGCAATGGCTAGTGATTTTAATCTGCCACCTATACTAGCAAAGGAAATAGTAGCCAGCTGTGATAAATGTCAACTAAAAGGGGAAGCCATACATGGACAAGTGGACTGTAGTCCAGGGATGTGGCAATTAGATTGCACACATCTAGAAGGAAAAGTAATTCTGGTAGCAGTCCATGTAGCCAGTGGCTATATAGAAGCAGAAGTTATCCCAGCAGAAACAGGACAGGAGACAGCATACTTTCTGCTAAAATTAGCAGGAAGATGGCCAGTAAAAGTAGTACACACAGACAATGGCAGCAATTTCACCAGCGCTGCATTTAAAGCAGCCTGTTGGTGGGCAGATGTCCAACAAGAATTTGGGATTCCCTACAATCCCCAAAGTCAAGGAGTAGTGGAATCTATGAATAAGGAACTAAAGAAAATCATAGGGCAGGTAAGAGAGCAAGCTGAACACCTTAAGACAGCAGTACAAATGGCAGTATTCATTCACAATTTTAAAAGAAAAGGGGGGATTGGGGGGTACAGTGCAGGAGAAAGAATAATAGACATAATAGCAACAGACATACAAACTAAAGCATTACAAAAAAACATTACAAAAATTCAAAATTTTCGGGTTTATTACAGGGACAGCAGAGATCCACTTTGGAAAGGACCAGCAAAACTACTCTGGAAAGGTGAAGGGGCAGTAGTAATAAAGGACAATAATGATATAAAGGTAGTACCAAGAAGGAAAGCAAAGATCATTAGGGATTATGGAAAACAGATGGCAGGTGATGATTGTGTGGCAGGTAGACAGGATGAGGATTAGAACCTGGAACAGTTTAGTAAAACATCATATGTATGTCTCAAAGAAAGCAAAAGATTGGTTTTATAGACATCACTTTGAAAGCAGGCATCCAAAAGTAAGTTCGGAAGTACACATCCCACTAGGAGAGGCTAAATTAGTAGTAAGAACATATTGGGGTCTGCATACAGGAGAAAAAGACTGGCACTTGGGTCATGGGGTCTCCATAGAATGGAGGCTAAAAAGATATAGCACACAAATAGATCCTGACCTGGCAGACCAACTAATTCATTTGCATTATTTTAAATGTTTTTCAGACTCTGCCATAAGGAAAGCCATATTAGGACAAGTAGTTAGCCCTAGTTGTGAATATCAAGCAGGACATAACAAGGTAGGATCTCTACAATATTTGGCACTGAAAGCATTAGTAACACCAACAAGGACAAAGCCACCTTTGCCTAGTGTGAAGAAATTAGCAGAGGACAGATGGAACAAGCCCCAGAAGACCAAGGGCCACAGAGGGAGCCATACAATGAATGGACATTAGAACTGTTAGAAGAGCTTAAGCATGAAGCTGTTAGACATTTTCCTAGGCCATGGCTTCATGGATTAGGACAACATATTTATAACACCTATGGGGATACTTGGGAAGGAGTTGAAGCAATAATAAGAATTCTGCAACAACTACTGTTTGTTCATTTCAGAATTGGGTGCTCACATAGCAGAATAGGCATTATTCGAGGGAGAAGAGTCAGAAATGGATCCGGTAGATCATAACCTAGAGCCCTGGAACCACCCGGGAAGTCAGCCTAAAACTGCTTGTAGCCCGTGTTACTGTAAAGTGTGTTGCTATCATTGTCAAGTTTGCTTTCTGAACAAAGGCTTAGGCATCTCCTATGGCAGGAAGAAGCGGAAACAGCGACGAGGAGCTTCTCAAAGCAGTAAGGATCATCAAAATCCTATACCAAAGCAGTAAGTATTAGTAATTAGTATATGTAATGTCTCCTTTGGAAATCTGTGCAATAATAGGACTGATAGTGGCGCTAATCCTAGCAATAGTTGTGTGGACTATAGTAGCTCTAGAATATAGGAAAGTGCTAAAGCAAAGGAAAATAGATAAGTTAATTGATAGAATAAGAGAAAGAGCAGAAGACAGTGGTAACGAGAGTGATGGAGACACAGAAGAATTGGCAGACCTTGTGGAGAGGGGGCCTCATGATCTTGGGGATGATAATAATCTGTAGTGCTGCAGAAAACTTGTGGGTTACTGTCTACTATGGGGTACCTGTGTGGAAAGATGCAGAGACCACCTTATTTTGTGCATCAGATGCGAAAGGATATGATAAAGAAGTGCATAATGTCTGGGCTACACATGCCTGTGTACCTACAGACCCCAACCCACAAGAAATAGATTTGAAAAATGTGACAGAAGATTTTAACATGTGGGAAAATAACATGGTAGAGCAGATGCATACAGATATAATCAGCCTATGGGACGAAAGCCTAAAACCATGTGTAAAGTTAACCCCTCTCTGCGTTACTTTAAATTGTAGCCATGAGGTCATGGTTGCTGCCAATGCCGATGGCACCACTGCCGGTACCACCACTGCCATTGGAGAGGAAGTAGAGAGCGGTTGCTATACCAGTACGGATCTATGGGATACGAATACGAAGGAGTATGCACTTTCAGATAGACTTGTTCTAGTTCCACTTGCTGAAGAGCTAGAGAAGAGTAGTAGTGGGGGGGATTGTTTAATAAATAGTAGTACTACCTCCATTACACCAGCATGCCCAAAAGTATCCTTTGAGCCAATTCCCATACATTATTGTGCTCCAGCTGGTTTTGCGATCCTAAAGTGTAATGATAAGGAGTTCAATGGAACAGGGCCGTGCCGTAATGTCAGCACAGTCCAATGCACACATGGAATCAAGCCAGTAGTATCAACTCAACTGCTGTTAAATGGCAGTCTAGCAGAAGGAAAGATAATGATTAGATCTGAAAATATCACAGACAATGCCAGAAGCATAATAGTACAACTTGACGAGCCTGTAGTAATTGATTGTACCAGACCTGACAACAATACCAGAACAAGTGTACGTATAGGACCAGGACAAGCATTCTATGCAACAGGTGACATAATAGGGGATATAAGACAAGCATATTGTACTGTCAATGCATCAGAGTGGAATAACACTTTACAACAGGTGAGGGAAGAATTACGAGAATACTTTGTGAACAAAACAATAATATTTGCTAGCTCCTCAGGAGGGGATCCAGAAATCACAACACATATGTTTAATTGTGGAGGAGAATTTTTCTATTGTAACACATCAGGTCTGTTTAATATCACTGACAGAACGGGGCCTGATGGCGATATTGCTCTCCCATGCAGAATAAAGCAAATTATAAAAATGTGGCAAAGAGTGGGACAAGCAATGTTTGCTCCTCCCATCCCAGGAGTAATAAGGTGTGTATCAAACATTACAGGACTATTATTAACAAGGGATGGTGGTAACAATACAATTGAAACCTTCAGACCTGAAGGAGGAGATATGAGGAATAATTGGAGAAGTGAATTATATAAGTATAAGGTGGTAAAAATTGAGCCAATAGGATTAGCACCCACCAAGGCAAGGAGAAGAGTGGTGGAGAGAGAAAAAAGAGGAATAGGAGTTGCCCTCCTTGGGTTCTTAGGAGCAGCTGGAAGCACTATGGGCGCAGCGTCAATAACGCTGACGGTACAGGCCAGAAAATTATTGTCTGGCATAGTGCAACAGCAAAGCAATTTGCTGAGGGCTATAGAGGCTCAACAGCATCTGTTGAGACTCACGGTCTGGGGCATTAAACAGCTCCAGGCAAGAGTCCTGGCTGTGGAAAGATACCTAAAGGATCAACAGCTCCTAGGAATTTGGGGCTGCTCTGGAAAACTCATCTGCACCACTAATGTGCCCTGGAACTCTAGTTGGAGTAATAAATCTCAGAAGGAGATATGGGAAAACATGACCTGGCTGCAATGGGAAAAAGAAATTGACAATTACACAGAGGTAATATATGAGCTACTTGAAGTATCGCAGAACCAGCAGGAAAAGAATGAACAAGACTTATTGGCATTAGACAAGTGGGCAAATCTGTGGAATTGGTTTGGCATAACAAAATGGCTGTGGTATATAAAAATATTTATAATGATAGTAGGAGGCTTAATAGGATTAAGAATAGTTTTTGCTGTGCTTTCTGTAATAAATAGAGTTAGGCAGGGATACTCACCTTTGTCGTTCCAGACCCATACCCCAAACCCAAGGGGTCTCGACAGGCCCGAAAGAATCGAAGAAGAAGGTGGAGAGCAAGACAGAGACAGATCGATTCGCTTAGTGAGCGGATTCTTAGCACTTGCCTGGGACGACCTACGGAGCCTGTGCCTCTTCAGCTACCACCGATTGAGAGACTTAATCTTGATTGCTGCGAGGACTGTGGAACTTCTGGGACACAGCAGTCTCAAGGGGTTGAGACTGGGGTGGAAAGGCCTCAAGTATCTGTGGAATCTCCTGATATATTGGGGACGGGAACTAAAAATTAGTGCTATTAGTTTGCTTGATACCGTAGCAATAGCAGTAGCTGCCTGGACAGATAGGGTTATAGAAGTAGGACAAAGAATTGGTAGAGCTATTCTCCACATACCTATAAGAATCAGACAGGGGCTTGAAAGGGCTTTGCTATAACATGGGGGGCAAGTGGTCAAAAAGTAGTATAGTGGGATGGCCTAAGATTAGGGAAAGAATGAGACGCACTCCTTCAGCAGCAACAGGAGTAGGAGCAGTATCTCAAGATTTAGATAAATATGGAGCAGTTACAAGTAGTAATGTAAATCACCCTAGTTGCGTCTGGCTGGAAGCGCAAGAGGAAGAGGAGGTAGGCTTTCCGGTCAGGCCACAAGTACCTCTAAGACCAATGACTTACAAGGCAGCTCTGGATCTCAGCCACTTTTTAAAAGAAAAGGGGGGACTGGATGGGTTAATTTACTCCAGGAAGAGACAGGAGATCCTTGATCTGTGGGTCTATCACACACAAGGTTACTTCCCTGATTGGCAGAATTACACACCAGGGCCAGGGCCTAGATTCCCACTAACATTTGGATGGTGCTTCAAGCTAGTACCAGTTGATCCAGATGAAGTAGAGAAGGCTAATGAGGGAGAGAACAACAGCCTATTACACCCTATGTGCCAACATGGAATGGATGATGAAGAGAGAGAAACATTAATATGGAAGTTTGACAGCCGCCTGGCCTTCACACACAGAGCCCGAGAGATGCATCCGGAGTACTACAAAGACTGCTGACACAGAAGTTGCTGACAGGGACTTTCCGCTGGGGACTTTCCAGGGGAGGTGTGGTTTGGGCGGAGTTGGGGAGTGGCTAACCCTCAGATGCTGCATATAAGCAGCCGCTTTTCGCCTGTACTGGGTCTCTCTTGGTAGACCAGATTGAGCCTGGGAGCTCTCTGGCTAGCGAGGGAACCCACTGCTTAAGCCTCAATAAAGCTTGCCTTGAGTGCTTCAAGAAA
>A1.UG.99.99UGG03379_AF484493_K.CM.96.MP535_AJ249239
GCGAGAGCGTCAGTATTAAGTGGGGGAAAATTAGATGCATGGGAGAAAATTCAGTTAAGGCCAGGGGGAAAGAAAAAATACCGATTAAAACATCTAGTATGGGCAAGCAGGGAGCTGGAAAGATTTGCACTTAACCCTAGCCTTTTAGAAACAGGAGAAGGATGTCAACAAATAATGGGACAGTTACAACCAGCTCTCCAGACAGGAACAGAAGAACTTAGATCATTATTTAATACAGTAGCAACCCTCTATTGTGTACATCAAAGAATACACGTAAGAGACACCAAGGAAGCTCTAGATAAAATAGAGGAAATACAAAATAAAAGCAAGCAAAAGAAACAACAGGCAGCAGCTGCAGCTGACACAGGAAGTGTCAGTCAAAATTACCCTATAGTACAGAATCTGCAGGGGCAAATGGTACACCAGGCCCTATCACCTAGAACTTTAAATGCATGGGTGAAGGTAATAGAGGAAAAGAATTTCAGCCCAGAAGTAATACCCATGTTCTCAGCATTATCCGAAGGAGCCACCCCACACGATTTAAATATGATGCTGAACATAGTGGGGGGACACCAGGCAGCTATGCAAATGTTAAAAGAAACCATCAATGAGGAAGCTGCAGAATGGGACAGGCTACATCCAATACATGCAGGGCCTGTAGCACCAGGCCAGATAAGAGAACCAAGGGGAAGTGATATAGCAGGAACTACTAGTACCCCTCAAGAACAAATAGCATGGATGACAAGCAACCCACCTATCCCAGTGGGAGACATCTATAAAAGATGGATAATCCTGGGATTAAACAAAATAGTAAGAATGTATAGCCCTGTTAGCATTTTGGATATAAAACAAGGGCCAAAAGAACCCTTCAGAGACTATGTAGATAGGTTCTTTAAAGTCCTCAGAGCTGAGCAAGCTACACAGGAGGTGAAAGGTTGGATGACAGAAACATTACTGGTCCAAAATGCAAATCCAGATTGTAAGTCCATTTTAAGAGCATTAGGAGCAGGGGCTACATTAGAAGAAATGATGACAGCATGCCAGGGAGTGGGAGGACCCGGCCATAAAGCAAGGGTTTTGGCTGAGGCAATGAGCCAAGTACACCAAACAAACATAATGATGCAGAAAGGCAATTTTAGGGGCCCGAAAAGAATTAAGTGTTTCAATTGTGGCAAAGAAGGACATCTAGCCAGAAATTGCAGGGCCCCTAGGAAAAAGGGCTGTTGGAAATGTGGAAAGGAGGGACACCAATTGAAGGACTGCTCTGAGAGACAGGCTAATTTTTTAGGGAAAATTTGGCCTTCCCACAAGGGGAGGCCAGGAAATTTTCCCCAGAGCAGACCAGAGCCAACAGCCCCACCAGCAGAGATCTTTGGGATGAGGGAAGAGCTAGTCTCCCCTCCGAAGCAGGAGCAGAACGACAGGGACCAGAACCCACCTTCAGTTTCCCTCAAATCACTCTTTGGCAACGACCCCTTGTTACAGTAAAAATAGGGGGACAGCTAAGAGAAGCTCTATTAGATACAGGAGCAGATGATACAGTATTAGAAGACATAAATTTGCCAGGAAGATGGAAACCAAAAATGATAGGGGGAATTGGAGGTTTCATCAAAGTAAAACAGTATGATCAAGTACCTATAGAAATTTGTGGAAAAAAGGCTATAGGTACAGTATTGGTAGGACCTACACCTGTCAACATAATTGGAAGAAATATGTTGACCCAGATTGGTTGTACTTTAAATTTCCCAATTAGTCCTATTGACACTGTACCAGTAAAATTAAAGCCAGGAATGGATGGCCCAAAGGTTAAACAATGGCCATTGACAGAAGAAAAAATAAAAGCATTAACAGAAATTTGTACAGAGATGGAAAAAGAAGGAAAAATTTCAAAAATTGGGCCTGAAAATCCATATAATACTCCAATATTTGCTATAAAGAAAAAAGACAGCACTAAATGGAGAAAATTAGTAGATTTCAGAGAGCTCAATAAAAGAACTCAAGACTTTTGGGAAGTTCAATTAGGAATACCGCATCCAGCGGGCTTAAAAAAGAAAAAATCAGTAACAGTACTAGATGTAGGGGACGCATATTTTTCAGTTCCCTTAGATGAAGACTTTAGAAAGTATACTGCATTCACCATACCTAGTACAAACAATGAGACACCAGGAATCAGGTATCAGTATAATGTGCTTCCACAGGGATGGAAAGGATCACCAGCAATATTCCAGAGTAGCATGACAAAAATCTTAGAGCCCTTTAGAGCAAAAAATCCAGAAATAGTTATCTATCAATACATGGATGACTTGTATGTAGGATCTGATTTAGAAATAGGGCAGCATAGAACAAAAGTAGAGGAGTTAAGAGAACATCTATTGAGCTGGGGATTTACTACACCAGACAAAAAGCATCAGAAAGAACCTCCATTTCTTTGGATGGGATATGAACTCCATCCTGACAAGTGGACAGTCCAACCTATACAGCTGCCAGAAAAAGAAAGTTGGACTGTCAATGATATACAGAAATTAGTAGGGAAACTAAATTGGGCAAGTCAAATTTATCCAGGAATTAAAATAAAACAATTGTGTAAACTCCTCAGGGGAGCCAAAGCATTAACAGATATAGTACCATTGACTGAAGAAGCAGAGTTAGAATTGGCAGAAAACAGGGAGATTCTAAAAGACCCTGTGCATGGAGTATATTATGACCCATCAAAAGACTTAATAGCAGAAATACAGAAACAAGGACAAGATCAATGGACATATCAAATTTTTCAAGAGCCATTTAAAAATCTAAAAACAGGAAAATATGCAAGAAAGAGGTCTGCTCACACTAATGATGTAAAACAATTAGCAGAAGTGGTGCAAAAAGTGACCATGGAAGGCATAGTAATATGGGGAAAGACTCCTAAATTTAGACTACCCATACAAAAAGAAACATGGGAAACATGGTGGATGGACTATTGGCAGGCTACCTGGATTCCTGAATGGGAGTTTGTCAATACCCCTCCTCTAGTAAAATTATGGTACCAGTTAGAGAAAGACCCCATAGTAGGAGTAGAGACTTTCTATGTAGATGGGGCAGCCAATAGGGAGACTAAGCTAGGAAAAGCAGGGTATGTCACTGACAGAGGAAGACAAAAGGTTGTTTCCCTAACTGAGACAACAAATCAAAGGACTGAATTACATGCAATCTACCTAGCCTTGCAGGATTCAGGATCAGAAGTAAATATAGTAACAGACTCACAGTATGCATTAGGAATCATTCAGGCCCAGCCAGACAGGAGTGAATCAGAGATAGTCAATCAAATAATAGAGAAATTAATAGAAAAGGACAAAGTCTACCTGTCATGGGTACCAGCACACAAAGGAATTGGAGGAAATGAACAAGTGGATAGATTAGTCAGTTCTGGAATCAGGAAGGTACTATTTTTAGATGGGATAGATAAAGCTCAAGAAGAACATGAAAGATATCACAGCAATTGGAGAACAATGGCTAGTGATTTTAATTTGCCACCTATAGTAGCAAAGGAAATAGTAGCCAGCTGTGATAAATGTCAGCTAAAAGGGGAAGCTATACATGGACAAGTAGACTGCAGTCCAGGGATGTGGCAATTAGATTGCACACATCTAGAAGGAAAAATAATTCTGGTAGCAGTCCATGTAGCTAGTGGCTATATAGAAGCAGAAGTTATCCCAGCAGAAACAGGACAGGAGACAGCATACTTTCTGCTAAAGTTAGCAGGAAGATGGCCAGTAAAAGTAGTACACACAGACAATGGCAGCAATTTCACCAGCGCTGCATTTAAAGCAGCCTGTTGGTGGGCAAATGTCCAACAAGAATATGGGATTCCCTACAATCCCCAAAGTCAAGGAGTAGTGGAATCTATGAATAAGGAATTAAAGAAAATCATAGGACAGGTAAGAGAGCAAGCTGAACACCTTAAGACAGCAGTACAAATGGCAGTGTTCATTCACAATTTTAAAAGAAAAGGGGGGATTGGGGGGTACAGTGCAGGAGAAAGAATAATAGACATAATAGCAACAGACATACAAACTAGAGAATTACAAAAACAAATTACAAATATTCAAAAATTTCGGGTTTATTACAGGGACAGCAGAGATCCAATTTGGAAAGGACCAGCAAAACTACTCTGGAAAGGTGAAGGGGCAGTGGTAATACAGGACAATAGTGATATAAAGGTAATACCAAGAAGAAAAGCAAAGATCATTAGGGATTATGGAAAACAGATGGCAGGTGATGATTGTGTGGCAGGTAGACAGGATGAGGATTAGAACATGGAACAGTTTAGTAAAACATCATATGTATATCTCAAAGAAAGCTAAAGGTTGGTTTTATAGACATCACTATGAAAGCAGGCATCCAAAAGTAAGTTCAGAAGTACACATCCCACTAGGGGACGCTAGAATAGTAGTAAGAACATATTGGGGTCTGCATACAGGAGAAAAAGACTGGCATTTGGGTCATGGGGTCTCCATAGAATGGAGGCTAAGAAGATATAGCACACAAATAGATCCTGACCTGGCAGACCAACTAATTCATCTGCATTATTTTAACTGTTTTTCAGACTCTGCCATAAGGAAAGCCATATTAGGGCAAGTAGTTAGCCCCAGTTGTGAATATCAAGCAGGACACAACAAGGTAGGATCTCTACAATATTTAGCACTAAAAGTATTAGTAACACCAACAGGGACAAAGCCACCTTTGCCTAGTGTTAAGAAGTTAGCAGAGGATAGATGGAGCAAGCCCCAGAAGACCAGGGGCCACAGAGGGAGCCATACAATGAATGGATGTTAGATCTATTAGAAGAACTTAAGCATGAAGCTGTGAGACATTTTCCTAGGCCATGGCTCCATGGATTAGGGCAACATATTTATAATACCTATGGGGATACTTGGGAAGGAGTTGAAGCTATAATGAGAACTTTGCAGCAACTACTGTTTGTTCATTTCAGAATCGGGTGCCAACACAGCAGAATAGGCATTCTTCAAGGGAGAAGAGTCAGGGATGGATCCGGTAGATCCTAGCCTAGAGCCCTGGAACCATCCGGGGAGTCAGCCTACAACTCCTTGTAGCAAGTGTTATTGCAAAGCGTGTTGCTATCATTGCATAGTTTGCTTTCAGACCAAGGGCTTAGGCATCTCCTATGGCAGGAAGAAGCGGAGACCCCGACGAGGCCCTCCTCAAGGCAGTGGGGATCATCAAAATCCTATACCAAAGCAGTAAGTATTGTTAATTAATATATGTAATGCAACCTTTAGAAATCTGGGCAATAGTAGGACTGATAGTAGCGCTAATCCTAGCAATAATTGTATGGACTATAGTAGGTATAGAATATAAGAAAGTGCTAAAGCAAAGAAAAATAGACAGGTTAATTGAAAGAATAAGAGAAAGAGCAGAAGACAGTGGCAATGAGAGTGACGGGGATACAGACGAATTATCCTTGCTGGTGGAAATGGGGAATTATGATCTTGGGGATGATAATAATTTGTAATGCAAACCACCCTTTGTGGGTCACGGTCTACTATGGGGTACCTGTGTGGAAAGAAGCAGCTACCACCCTATTTTGTGCATCAGATGCTAAAGCACATGATACAGAAGCGCATAATGTCTGGGCTACACATGCCTGTGTACCCACAGACCCCAACCCACAAGAAATAAATTTGGTCAATGTGACAGAAAAGTTTAACATGTGGAAAAATAACATGGTAGAGCAGATGCATGAAGATATAATCAGTCTATGGGACCAAAGCCTACAGCCATGTGTAAAGTTAACCCCTCTCTGCGTCACGTTAGAGTGTAATCATACCACCAATAACATCACCAATGATATCAATAGTACAGTTAACATGAAAGAAGAAATAAAAAACTGCTCTTTCAATATGACCACAGAACTAAGAGATAAGAAACAGAAAGTATATTCACTTTTTTATAAACTTGATATAGTACAAATGAAAGAAGATAATAGTACAATGAAAGAAGATAATAGTAATACCAGTAGGTATAGATTAATAAATTGTAATACCTCAGCCATTACACAAGCTTGTCCAAAGGTAACCTTTGAGCCAATTCCCATACATTATTGTGCCCCAGCTGGTTTTGCGATCCTAAAGTGTAATGACAAGGAGTTCAATGGAACAGGGCTATGCAAGAATGTCAGCACAGTACAATGCACACATGGAATCAAGCCAGTGGTATCAACTCAACTGCTGTTAAATGGCAGTCTAGCAGAGGGTGAGATAAGAATTAGATCTGAAAATATCTCAGACAATGCTAAAACCATAATAGTACAACTTGTCAAGTCTGTACCAATTAAGTGTATCAGACCTAACAACAATACAAGAAAAAGTATACGTATAGGACCAGGACAAACATTCTATGCAGGTGATGTAATAGGGGATATAAGACAAGCACATTGTAATGTCAGTAGGTCAGATTGGAATAAAACTTTACATCAGGTAGCTACACAATTAAGACAATACTGGAACAGCAGCATAATAATCTTTACTAACTCCTCAGGAGGGGATTTAGAAATTACAACACATAGTTTTAATTGTGGAGGAGAATTTTTCTATTGTAATACATCAGGCCTGTTTAATAATACTTACACTACTGACAGCATAGAGTCAAATGACACGGAGCCAGATGCAAATATAACTCTTCCATGCAGAATAAAGCAAATTATAAATATGTGGCAGAGAGTAGGACAAGCAATATATGCCCCTCCCATCCAAGGAGTAATAAAGTGTGAGTCAAACATCACAGGACTACTATTAACAAGAGATGGTGGTACTAACAGTACTAAAAGTACTGAAACCTTCAGACCTGGAGGAGGAGATATGAGGGACAATTGGAGAAGTGAATTATATAAGTATAAAGTAGTACAAGTTGAACCAATAGGAGTAGCACCCACCAGGGCAAAGAGAAGAGTGGTGGAGAGAGAAAAAAGAGCAGTTGGAATAGGAGCTGTACTCCTTGGGTTCTTAGGAGCAGCTGGAAGCACAATGGGCGCGGCGTCAATAACGCTGACGGTACAGGCCAGACAGTTATTGTCTGGCATAGTGCAGCAGCAAAGCAATTTGCTGAGGGCTATAGAGGCTCAACAGCAACTGTTGAGACTCACTGTCTGGGGCATTAAACAGCTCCAGGCAAGAGTCCTGGCTGTGGAAAGATACCTAAAGGATCAACAGCTCCTAGGAATTTGGGGCTGCTCTGGAAAACTCATCTGCACCACTAATGTGCCCTGGAACGCTAGCTGGAGTAATAAATCTTATGGGGAGATATGGGATAACATGACCTGGCTGCAATGGGATAAAGAAATTAGCAATTACACAAACATAATATATAAGCTAATTGAAGAATCGCAGAACCAGCAGGAAAAGAATGAACAAGACTTGTTGGCATTGGACCAGTGGGCAAGTCTGTGGAATTGGTTTGACATAACAAAATGGCTGTGGTACATAAAAATATTTATAATGATAGTAGGAGGTATAATAGGATTAAGAATAGTTCTTGCTGTGCTTTCTGTAATAAATAGAGTTAGGCAGGGATACTCACCTCTGTCGTTTCAGACCCATACCCCAAACCCAGGGGGACTCGACAGGCCCGAAAGAACCGAAGAAGAAGGTGGAGAGCAAGACAGAACCAGATCGATTCGCTTAGTCAGCGGATTCTTAGCACTTGCCTGGGACGACCTGCGGAGCCTGTGCCTCTTCAGCTACCACCGCTTGAGAGACTTCGTCTTGATTGCTGCGAGGATTGTGGAACTTCTGGGACACAGCAGTCTCCAGGGGTTGAAACTGGGGTGGGAAAGACTCAAGTATCTGGGGAATCTCCTGCTGTATTGGGGTCGGGAACTAAGAATTAGTGCTATTAGTTTGTATGATACCATAGCAATAACAGTAGCTGGCTGGACAGATAGGGTTATAGAAAGAGGACAAAGACTTGGTAGAGCTCTTATCCACATACCTAGAAGAATCAGGCAGGGCTTAGAAAGGGCTTTACTATAACATGGGTAACAAGTGGTCAAAAAGTAGCATAGTGGGATGGCCTAGGGTTAGGGAAAGAATAAGACAAACTCCTCCAGCAGCAGAAGGAGTAGGAGCAGCATCTCAAGATTTAGAAAAACATGGAGCAATCACAAGCAGTAATATAAGTCACCCTAGTTGCGCCCGGCTGGAAGAGCAAGAAGATGAGGTAGGGTTTCCAGTTAGGCCACAAGTACCCTTACGACCAATGACTTACAAGGGGGCTTTAGATCTCAGCCACTTTTTAAAAGAAAAGGGGGGACTGGATGGGTTAATTTACTCCAGGAAAAGACAAGAGATCCTTGATCTGTGGGTCTACAACACACAAGGCTACTTCCCTGATTGGCAGAATTACACACCAGGGCCAGGGATCAGATACCCACTAACATTTGGATGGTGCTTCAAGTTAGTACCAGTGGATCCAGCTGAAGTAGAGGAAGATACTGGAGGAGAGAACAATAGCCTATTACACCCTATATGCCAACATGGAATGGATGATGAGGAGAGAGAGACATTAATGTGGAAGTTTGACAGCCGCCTGGCACTAAAACACAGAGCTCAAGAGCTGCATCCGGAGTTCTACAAAGACTGCTGACACAGGAGTTGCTGACAGGGACTTTCCGCTGGGGACTTTCCAGGGGAGGTGTGGTTTGGGCGGAGTTGGGGAGTGGCTAACCCTCAGATGCTGCATATAAGCAGCTGCTTTTCGCTTGTACTGGGTCTCTCTTGATAGACCAGATTGAGCCTGGGAGCTCTCTGGCTAACAAGGGAACCCACTGCT
>A2.CD.97.97CDKFE4_AF286240_B.DE.86.D31_U43096
CCAGCCAAAATTACCCTATAGTGCAGAATGCACAAGGGCAAATGGTACACCAGGCCCTATCACCTAGGACTTTAAATGCATGGGTCAAAGTAGTAGAAGAAAAGGCTTTCAGCCCAGAAGTAATACCCATGTTTTCAGCATTATCAGAAGGAGCCACCCCACAAGATTTAAATACTATGCTAAACACGGTGGGGGGACATCAAGCAGCTATGCAAATATTAAAAGATACCATCAATGAGGAAGCTGCAGAATGGGACAGGCTACATCCAGTACATGCAGGGCCTATTCCACCAGGCCAGATGAGAGAACCAAGGGGAAGTGACATAGCAGGAACTACTAGTACCCTTCAGGAACAAATAGGATGGATGACTAGCAACCCACCTATCCCAGTGGGAGAAATCTATAAAAGATGGATAATCCTGGGATTAAATAAGATAGTAAGAATGTATAGCCCTGTCAGTATTTTGGACATAAGACAAGGGCCAAAAGAACCCTTTAGAGACTATGTAGATAGGTTCTTTAAAACTCTCAGAGCTGAGCAAGCTACACAAGAGGTAAAAAACTGGATGACAGACACCTTGCTGGTCCAAAATGCGAACCCAGATTGTAAATCAATCCTGAAAGCATTAGGACCAGGGGCTACATTAGAAGAAATGATGACAGCATGTCAGGGAGTGGGGGGACCCGGCCATAAAGCAAGGGTTTTGGCTGAAGCAATGAGCCAATTACAAAATGCAACTCCAAACATAATGATGCAGAAAGGCAATTTTAGGGGTCAAAAAAGAATCAAATGTTTCAACTGTGGCAAGGAAGGACACCTAGCCAGAAATTGCAGGGCCCCTAGGAAAAAGGGCTGCTGGAAATGTGGGAAGGAAGGACATCAGATGAAAGACTGCACTGAGAGACAGGCTAATTTTTTAGGGAAAATTTGGCCTCCCAACAGAGGGAGGCCAGGAAATTTTCCCCAGAGCAGACCAGAGCCAACAGCCCCACCAGCAGAGGACTTTGGAATGGGGGAAGAGACAAAAAACAGGGAACCGCATACTCCTGCAATTTCCCTCAAATCACTCTTTGGCAGCGACCTCTTGTCACAGTAAAAATAGAAGGACAGCTAAGAGAAGCTCTATTAGATACAGGAGCAGATGATACAGTGTTAGAAGACATAAATTTGCCAGGAAAATGGAAACCAAAAATGATAGGGGGAATTGGAGGTTTTATCAAAGTAAGACAATATGATCAGATAGCTATAGAAATTTGTGGAAAAAGGGCCATAGGTACAGTATTAGTAGGACCTACACCTGTCAACATAATTGGAAGAAATATGTTGGTTCAGCTTGGTTGTACTTTAAATTTTCCAATAAGTCCTATTGAAACTGTACCAGTAAAATTAAAGCCAGGAATGGATGGCCCAAAGGTTAAACAATGGCCATTGACAGAAGAAAAAATAAAAGCATTAACAGAAATTTGTGGAGAAATGGAAAAGGAAGGAAAAATTTCAAAAATTGGGCCTGAAAACCCATACAACACTCCAGTGTTTGCTATAAAGAAAAAAGACAGCACTAAATGGAGAAAATTAGTAGATTTCAGAGAACTCAATAAGAGAACTCAAGACTTTTGGGAAGTTCAGTTAGGAATACCACATCCAGCAGGATTAAAAAAGAAAAAATCAGTAACAGTACTAGATGTGGGGGACGCATATTTTTCCGTTCCCTTAGATGAAGACTTCAGAAAGTATACTGCATTCACCATACCTAGTATAAACAATGAGTCACCAGGAATTAGGTATCAGTACAATGTACTTCCACAGGGATGGAAAGGATCACCATCAATATTCCAGAGTAGCATGACAAAAATTTTAGAGCCCTTTAGATCAAAATATCCAGAGATGGTTATATACCAGTACATGGATGACTTGTATGTAGGATCTGATTTGGAAATAGGTCAGCATAGAGCAAAAATAGAGGAATTAAGGGCTCATTTATTAAGATGGGGATTTACTACACCAGACAAAAAACATCAGAAAGAGCCCCCATTTCTTTGGATGGGATATGAGCTTCATCCTGACAAATGGACAGTCCAGCCTATAAAGCTGCCAGAAAAAGACAGCTGGACTGTCAATGATATACAGAAATTAGTAGGAAAGTTAAATTGGGCAAGTCAGATTTATGCAGGGATTAAAGTAAAGCAACTGTGTAGACTCCTTAGAGGAACCAAAGCACTAACAGACATAGTAACACTGACTAAAGAAGCAGAATTAGAATTGGAAGAGAACAGGGAGATTCTAAAAAACCCTGTACATGGGGTATACTATGACCCATCAAAAGACTTAATAGCAGAAATACAGAAACAAGGGCAAGATCAATGGACATATCAAATTTATCAAGAGCCATTTAAAAATCTAAAAACAGGGAAATATGCAAAAAAGAAATCCACACACACTAATGATGTAAAACAATTAACAGAAGCAGTACAAAAAATAGCCATAGAAAGCATAGTAATATGGGGAAAGACTCCTAAATTTAGATTACCCATACAAAAAGAAACATGGGAGACATGGTGGACGGAGTATTGGCAGGCTACCTGGATTCCTGAGTGGGAGTTTGTCAATACCCCTCCTCTAGTAAAACTATGGTACCAATTAGAAACAGAACCCCTAGCAGGAGCAGAAACTTTCTATGTAGATGGGGCAGCTAATAGAGAGACTAAACTAGGAAAGGCAGGGTATGTCACTGACAGAGGAAGACAAAAAATTGTCTCCCTGACGGAAACAACAAATCAAAAGACTGAATTACATGCAATCTATTTGGCTTTACAGGATTCAGGATTAGAAGTGAACATAGTGACAGATTCACAGTATGCATTAGGAATCATTCAGGCACAACCAGATAGGAGTGAATCAGAGTTAGTCAATCAAATAATAGAAAAGTTAATAGAAAAGGAAAGGGTCTACCTGGCATGGGTACCAGCACACAAAGGGATTGGAGGAAATGAACAGGTAGATAAATTAGTCAGTTCTGGAATCAGGAAAGTGCTATTTTTAGATGGGATAGATAAGGCTCAAGAAGAACATGAAAGATATCACAGTAATTGGAGAGCAATGGCTCAGGACTTTAATCTGCCACCTATAGTAGCAAAAGAAATAGTAGCTAGCTGTGATAAGTGTCAGCTAAAAGGGGAAGCCATGCATGGACAAGTAGATTGTAGTCCAGGAATATGGCAACTAGATTGTACACATCTAGAAGGAAAAGTTATCCTGGTAGCAGTCCATGTAGCCAGTGGCTACATAGAAGCAGAAGTTATTCCAGCAGAGACAGGACAGGAAACAGCATACTTTATATTAAAATTAGCAGGAAGATGGCCAGTAAAAGTGATACATACAGACAATGGGCCCAATTTCACTAGTGCAACAGTCAAGGCAGCCTGTTGGTGGGCAGGTGTCCAACAAGAATTTGGGATTCCCTACAATCCCCAAAGTCAAGGAGTAGTAGAATCTATGAATAAAGAATTAAAGAGAATCATAGGGCAGATAAGAGATCAAGCTGAACACCTTAAGACAGCAGTACAAATGGCAGTATTCATTCACAATTTTAAAAGAAAAGGGGGGATTGGGGGATACAGTGCAGGGGAAAGAATAATAGACATAATAGCAACAGATATACAAACTAAAGAATTACAAAAACAAATTATAAAAATTCAAAATTTTCGGGTTTATTACAGGGACAGCAGGGATCCAATTTGGAAAGGACCAGCAAAACTCCTCTGGAAAGGTGAAGGGGCAGTAGTAATACAAGACAACAGTGATATCAAGGTAGTACCAAGAAGAAAAGCAAAGATCATCAGGGATTATGGAAAACAGATGGCAGGTGATGATTGTGTGGCATGTAGACAGGATGAGGATTAGAACATGGAACAGTTTAGTAAAACATCATATATATGTTTCAAGGAAAGCTAAAGATTGGTCCTATAGACATCACTATGAAAGCAGACATCCAAAAGTAAGTTCAGAAGTACACATCCCGCTAGGGGAGGCTAGATTAGTAGTAAGAACATATTGGGGTCTGCAACCAGGAGAACAAGCCTGGCACTTGGGGCATGGGGTCTCCATAGAATGGAGGCAGAAAAGGTATAGTACACAAATAGACCCTGATCTGGCAGATCATCTAATCCATCTGTATTATTTTGACTGTTTTTCAGAATCTGCCATAAGGAAAGCCATATTAGGAGAAATAGTTAGCCCTAGGTGTGAATATCAAGCAGGACATAACAAGGTAGGATCGCTGCAGTACTTGGCATTGAAAGCATTAGTAGCTCCAACAAGGGCAAAGCCACCTTTACCTAGTGTTAAGAAATTAGTAGAGGATAGATGGAACAAGCCCCAGAAGACCAGGGGCCACAGAGGGAGCCATACAATGAATGGACACTAGAGCTTTTAGAGGAGCTTAAGAGTGAAGCTGTTAGACATTTCCCTAGGATATGGCTTCATAGCTTAGGACAACATATCTATGAGACTTATGGGGATACTTGGGAAGGAGTTGAAGCTATAACAAGAACTCTGCAACAACTACTGTTTGTCCATTTCAGAATGGGGTGCCATCATAGCAGGATAGGTGTTACGCGACAGAGGAGAGCAAGGAATGGATCCAGTAGACCCTAAATTAGAGCCCTGGAACCATCCGGGAAGTCAGCCTAAAACTGCTTGTACCAAGTGTTATTGTAAAAAGTGTTGCTATCATTGCCCAGTGTGCTTTCTAAACAAGGGCTTAGGCATCTCCTATGGCAGGAAGAAGCGGAGACACCGACGAGGACCTGCTCAAAGCAGTAAGAATCATCAAAATCCTGTACCAAAGCAGTAAGTAGTAGTAATTAATAGATGTAATGATACCTTTAGCAATTTTGTCAATAGTAGGGCTGATAGTAGCATTAATCTTAGCAATAGTTATATGGACTATAGTATTTATAGAATATAGGAAAATTCAGAAGGAAAGGAAAATAGACAGGCTAATCAAGAGAATAAGTGAAAGAGCAGAAGACAGTGGCAATGAGAGTGATGGGGATACAGAGGAATTGTCCACCCTTATGGGGGTGGGAATCTTGCTTTTT
>A2.CD.97.97CDKFE4_AF286240_C.ZA.04.04ZASK182B1_AY878054
CCAGCCAAAATTACCCTATAGTGCAGAATGCACAAGGGCAAATGGTACACCAGGCCCTATCACCTAGGACTTTAAATGCATGGGTCAAAGTAGTAGAAGAAAAGGCTTTCAGCCCAGAAGTAATACCCATGTTTTCAGCATTATCAGAAGGAGCCACCCCACAAGATTTAAATACTATGCTAAACACGGTGGGGGGACATCAAGCAGCTATGCAAATATTAAAAGATACCATCAATGAGGAAGCTGCAGAATGGGACAGGCTACATCCAGTACATGCAGGGCCTATTCCACCAGGCCAGATGAGAGAACCAAGGGGAAGTGACATAGCAGGAACTACTAGTACCCTTCAGGAACAAATAGGATGGATGACTAGCAACCCACCTATCCCAGTGGGAGAAATCTATAAAAGATGGATAATCCTGGGATTAAATAAGATAGTAAGAATGTATAGCCCTGTCAGTATTTTGGACATAAGACAAGGGCCAAAAGAACCCTTTAGAGACTATGTAGATAGGTTCTTTAAAACTCTCAGAGCTGAGCAAGCTACACAAGAGGTAAAAAACTGGATGACAGACACCTTGCTGGTCCAAAATGCGAACCCAGATTGTAAATCAATCCTGAAAGCATTAGGACCAGGGGCTACATTAGAAGAAATGATGACAGCATGTCAGGGAGTGGGGGGACCCGGCCATAAAGCAAGGGTTTTGGCTGAAGCAATGAGCCAATTACAAAATGCAACTCCAAACATAATGATGCAGAAAGGCAATTTTAGGGGTCAAAAAAGAATCAAATGTTTCAACTGTGGCAAGGAAGGACACCTAGCCAGAAATTGCAGGGCCCCTAGGAAAAAGGGCTGCTGGAAATGTGGGAAGGAAGGACATCAGATGAAAGACTGCACTGAGAGACAGGCTAATTTTTTAGGGAAAATTTGGCCTCCCAACAGAGGGAGGCCAGGAAATTTTCCCCAGAGCAGACCAGAGCCAACAGCCCCACCAGCAGAGGACTTTGGAATGGGGGAAGAGACAAAAAACAGGGAACCGCATACTCCTGCAATTTCCCTCAAATCACTCTTTGGCAGCGACCTCTTGTCACAGTAAAAATAGAAGGACAGCTAAGAGAAGCTCTATTAGATACAGGAGCAGATGATACAGTGTTAGAAGACATAAATTTGCCAGGAAAATGGAAACCAAAAATGATAGGGGGAATTGGAGGTTTTATCAAAGTAAGACAATATGATCAGATAGCTATAGAAATTTGTGGAAAAAGGGCCATAGGTACAGTATTAGTAGGACCTACACCTGTCAACATAATTGGAAGAAATATGTTGGTTCAGCTTGGTTGTACTTTAAATTTTCCAATAAGTCCTATTGAAACTGTACCAGTAAAATTAAAGCCAGGAATGGATGGCCCAAAGGTTAAACAATGGCCATTGACAGAAGAAAAAATAAAAGCATTAACAGAAATTTGTGGAGAAATGGAAAAGGAAGGAAAAATTTCAAAAATTGGGCCTGAAAACCCATACAACACTCCAGTGTTTGCTATAAAGAAAAAAGACAGCACTAAATGGAGAAAATTAGTAGATTTCAGAGAACTCAATAAGAGAACTCAAGACTTTTGGGAAGTTCAGTTAGGAATACCACATCCAGCAGGATTAAAAAAGAAAAAATCAGTAACAGTACTAGATGTGGGGGACGCATATTTTTCCGTTCCCTTAGATGAAGACTTCAGAAAGTATACTGCATTCACCATACCTAGTATAAACAATGAGTCACCAGGAATTAGGTATCAGTACAATGTACTTCCACAGGGATGGAAAGGATCACCATCAATATTCCAGAGTAGCATGACAAAAATTTTAGAGCCCTTTAGATCAAAATATCCAGAGATGGTTATATACCAGTACATGGATGACTTGTATGTAGGATCTGATTTGGAAATAGGTCAGCATAGAGCAAAAATAGAGGAATTAAGGGCTCATTTATTAAGATGGGGATTTACTACACCAGACAAAAAACATCAGAAAGAGCCCCCATTTCTTTGGATGGGATATGAGCTTCATCCTGACAAATGGACAGTCCAGCCTATAAAGCTGCCAGAAAAAGACAGCTGGACTGTCAATGATATACAGAAATTAGTAGGAAAGTTAAATTGGGCAAGTCAGATTTATGCAGGGATTAAAGTAAAGCAACTGTGTAGACTCCTTAGAGGAACCAAAGCACTAACAGACATAGTAACACTGACTAAAGAAGCAGAATTAGAATTGGAAGAGAACAGGGAGATTCTAAAAAACCCTGTACATGGGGTATACTATGACCCATCAAAAGACTTAATAGCAGAAATACAGAAACAAGGGCAAGATCAATGGACATATCAAATTTATCAAGAGCCATTTAAAAATCTAAAAACAGGGAAATATGCAAAAAAGAAATCCACACACACTAATGATGTAAAACAATTAACAGAAGCAGTACAAAAAATAGCCATAGAAAGCATAGTAATATGGGGAAAGACTCCTAAATTTAGATTACCCATACAAAAAGAAACATGGGAGACATGGTGGACGGAGTATTGGCAGGCTACCTGGATTCCTGAGTGGGAGTTTGTCAATACCCCTCCTCTAGTAAAACTATGGTACCAATTAGAAACAGAACCCCTAGCAGGAGCAGAAACTTTCTATGTAGATGGGGCAGCTAATAGAGAGACTAAACTAGGAAAGGCAGGGTATGTCACTGACAGAGGAAGACAAAAAATTGTCTCCCTGACGGAAACAACAAATCAAAAGACTGAATTACATGCAATCTATTTGGCTTTGCAAGATTCAGGATCAGAGGTAAACATAGTGACAGACTCACAGTATGCATTAGGGATCATTCAAGCACAACCAGATAAGAGTGAGTCAGAGTTAGTCAATCAAATAATAGAAAAGTTAATAGAAAAGGAAAGGGTCTACCTGGCATGGGTACCAGCACACAAAGGGATTGGAGGAAATGAACAGGTAGATAAATTAGTCAGTTCTGGAATCAGGAAAGTGCTATTTTTAGATGGGATAGATAAGGCTCAAGAAGAACATGAAAGATATCACAGTAATTGGAGAGCAATGGCTCAGGACTTTAATCTGCCACCTATAGTAGCAAAAGAAATAGTAGCTAGCTGTGATAAGTGTCAGCTAAAAGGGGAAGCCATGCATGGACAAGTAGATTGTAGTCCAGGAATATGGCAACTAGATTGTACACATCTAGAAGGAAAAGTTATCCTGGTAGCAGTCCATGTAGCCAGTGGCTACATAGAAGCAGAAGTTATTCCAGCAGAGACAGGACAGGAAACAGCATACTTTATATTAAAATTAGCAGGAAGATGGCCAGTAAAAGTGATACATACAGACAATGGGCCCAATTTCACTAGTGCAACAGTCAAGGCAGCCTGTTGGTGGGCAGGTGTCCAACAAGAATTTGGGATTCCCTACAATCCCCAAAGTCAAGGAGTAGTAGAATCTATGAATAAAGAATTAAAGAGAATCATAGGGCAGATAAGAGATCAAGCTGAACACCTTAAGACAGCAGTACAAATGGCAGTATTCATTCACAATTTTAAAAGAAAAGGGGGGATTGGGGGATACAGTGCAGGGGAAAGAATAATAGACATAATAGCAACAGATATACAAACTAAAGAATTACAAAAACAAATTATAAAAATTCAAAATTTTCGGGTTTATTACAGGGACAGCAGGGATCCAATTTGGAAAGGACCAGCAAAACTCCTCTGGAAAGGTGAAGGGGCAGTAGTAATACAAGACAACAGTGATATCAAGGTAGTACCAAGAAGAAAAGCAAAGATCATCAGGGATTATGGAAAACAGATGGCAGGTGATGATTGTGTGGCATGTAGACAGGATGAGGATTAGAACATGGAACAGTTTAGTAAAACATCATATATATGTTTCAAGGAAAGCTAAAGATTGGTCCTATAGACATCACTATGAAAGCAGACATCCAAAAGTAAGTTCAGAAGTACACATCCCGCTAGGGGAGGCTAGATTAGTAGTAAGAACATATTGGGGTCTGCAACCAGGAGAACAAGCCTGGCACTTGGGGCATGGGGTCTCCATAGAATGGAGGCAGAAAAGGTATAGTACACAAATAGACCCTGATCTGGCAGATCATCTAATCCATCTGTATTATTTTGACTGTTTTTCAGAATCTGCCATAAGGAAAGCCATATTAGGAGAAATAGTTAGCCCTAGGTGTGAATATCAAGCAGGACATAACAAGGTAGGATCGCTGCAGTACTTGGCATTGAAAGCATTAGTAGCTCCAACAAGGGCAAAGCCACCTTTACCTAGTGTTAAGAAATTAGTAGAGGATAGATGGAACAAGCCCCAGAAGACCAGGGGCCACAGAGGGAGCCATACAATGAATGGGTGTTAGAACTGTTAGAAGAGCTCAAGCAGGAGGCTGTTAGACATTTCCCTGGGCAGTGGCTACACGGCCTAGGACAACATATCTATAATACCTATGGGGATACTTGGGAAGGAGTTGAAGCTATAACAAGAACTCTGCAACAACTACTGTTTGTCCATTTCAGAATGGGGTGCCATCATAGCAGGATAGGTGTTACGCGACAGAGGAGAGCAAGGAATGGATCCAGTAGACCCTAAATTAGAGCCCTGGAACCATCCGGGAAGTCAGCCTAAAACTGCTTGTACCAAGTGTTATTGTAAAAAGTGTTGCTATCATTGCCCAGTGTGCTTTCTAAACAAGGGCTTAGGCATCTCCTATGGCAGGAAGAAGCGGAGACACCGACGAGGACCTGCTCAAAGCAGTAAGAATCATCAAAATCCTGTACCAAAGCAGTAAGTAGTAGTAATTAATAGATGTAATGATACCTTTAGCAATTTTGTCAATAGTAGGGCTGATAGTAGCATTAATCTTAGCAATAGTTATATGGACTATAGTATTTATAGAATATAGGAAAATTCAGAAGGAAAGGAAAATAGACAGGCTAATCAAGAGAATAAGTGAAAGAGCAGAAGACAGTGGCAATGAGAGTGATGGGGATACAGAGGAATTGTCCACCCTTATGGGGGTGGGAATCTTGCTTTTT
>A2.CD.97.97CDKS10_AF286241_D.UG.92.92UG001_AJ320484
AGCTATAAGAGAGACTTAATTAGGAAAAGCAGGATTTGTCACTGACAGAGGAAGACAAAAAATTGTCTCCCTGACGGAGACAACAAATCAAAAGACTGAATTACATGCAATCTATTTAGCTTTACAGGATTCAGAATTAGAAGTAAACATAGTAACAGATTCACAGTATGCATTAGGAATCATTCAGGCACAACCAGATAGGAGTGAATCAGAGTTAGTCAATCAAATAATAGAAAAGTTAATAGAAAAAGAGAGGGTCTACCTGTCATGGGTACCAGCACACAAGGGGATTGGAGGAAATGAACAGGTAGACAAATTAGTCAGTTCTGGAATCAGGAAAGTGTTATTTTTAGATGGAATAGATAAAGCTCAAGAAGAACATGAAAGATATCACAGCAATTGGAGAGCCATGGCTCATGACTTTAATCTGCCACCTATAGTAGCAAAAGAAATAGTAGCTAGTTGTGACAAATGTCAGCTAAAAGGGGAAGCCATGCATGGACAAGTAGACTGTAGCCCAGGAATATGGCAACTAGATTGCACACATCTAGAAGGAAAAGTTATCCTGGTAGCAGTCCATGTAGCCAGTGGCTATATAGAAGCAGAAGTCATTCCAGCAGAAACAGGACAGGAAACAGCATACTTTATATTAAAACTAGCAGGAAGATGGCCAGTAAAAGTAATACATACTGACAATGGGTCCAATTTCACCAGTGCAACAGTTAAGGCAGCCTGTTGGTGGGCAGGAGTCCAACAGGAATTTGGAATTCCCTACAATCCCCAAAGTCAAGGAGTAGTGGAATCTATGAACAAAGAATTAAAGAAAATCATAGGGCAAGTAAGAGACCAAGCTGAACACCTTAAGACAGCAGTACAAATGGCAGTATTCATCCACAATTTTAAAAGAAAAGGGGGGATTGGGGGATACAGTGCAGGGGAAAGAATAATAGACATAATAGCAACAGACATACAAACTACAAAATTACAAAAACAAATCATAAAAATTCAAAATTTTCGGGTTTATTACAGGGACAGCATAGATCCCATTTGGAAAGGACCAGCAAAACTCCTCTGGAAAGGTGAAGGGGCAGTAGTAATACAAGACAATAGTGAGATAAAGGTAGTACCAAGAAGAAAAGCAAAGATCATTAGGGATTATGGAAAACAGATGGCAGGTGATGATTGTGTGGCAGGTAGACAGGATGAGGATTAGAACATGGAACAGTTTAGTAAAACATCATATGTATATTTCAAAGAAAGCTAAAAAGTGGTTCTATAGACATCACTATGAAAGTAGACATCCGAGAGTAAGTTCAGAAGTACACATCCCGTTAGGGGAGGCTACATTAATAGTAAGAACATATTGGGGTCTGCACCCAGGAGAGAAAGAATGGCAATTGGGTCATGGGGTCTCCATAGAATGGAGGCAGAAGAGGTATAGTACACAAATAGACCCTGATCTGGCAGACCATCTAATCCATCTGTATTATTTTGACTGTTTTTCAGAATCTGCCATAAGGAAAGCCATATTAGGAGAAATAGTTAGTCCTAGGTGCGAATATCAAGCAGGACATAACAAGGTAGGATCTCTGCAATATTTGGCATTGAAAGCATTAGTAGTCCCAAACAAGGCAAGGCCACCCTTGCCTAGTGTTAGGAAATTAGTAGAGGATAGATGGAACAAGCCCCGGAAGACCAGGGGCCACCGAGGGAGCCACACAATGAATGGGTGCTAGAACTATTAGAGGAGCTCAAGCAGGAAGCTGTTAGGCATTTCCCTCGGCAGTGGCTACATGGCCTAGGACAACTTATATATAGTACCTATGGGGATACTTGGGAAGGAGTTGAAGCTATAATAAGAACTTTGCAACAACTGCTGTTTGTCCATTTCAGAATTGGGTGCCGACATAGCAGAATAGGCATTTCGAAGAAGAAGAGTAAGGATGGAGCCAGTAGATCCTAAACTAGAGCCCTGGAACCATCCGGGAAGCCAGCCTAAAACTGCTTGTAACAAGTGCTATTGTAAAAAGTGTTGCTATCATTGCCAGCTGTGCTTTTTAAACAAAGGCTTAGGCATCTCCTATGGCAGGAAGAAGCGGAGACCCCGACGAGGACCTTCTCAGAGCAGTAAAGATCATCAAAATCCTATACCAAAGCAGTAAGTAGTGGTAATTAATAATGTAATGTTGTCCTTAGAAATAGCTGCAATAGTAGGACTGGTAGTAGCATTAATCGCAGCAATAGTTGTATGGACTATAGTATTTATAGAATATAGGAAGATTAGGGAGCAAAGGAAAATAGACTGGTTAATCCAAAGAATAAGTGAAAGAGCAGAAGACAGTGGCAATGAGAGTGATGGGGACACAGACGAGTTATCAGCACTTGTGGAGATGGGGAATCTTAATTTTGGGGATGCTAATAATTTGTAAAGCTACAGATTGGTGGGTCACAGTATACTATGGAGTACCTGTGTGGAAAGATGCAGAAACCACCTTATTTTGCGCATCAGATGATAAAGCATATGAGACAGAAGCGCATAATGTCTGGGCCACACATGCCTGTGTACCCACAGACCCCAACCCACAAGAAGTAAACCTAAAAAATGTGACAGAAGATTTTAACATGTGGAAAAATAATATGGTAGAGCAGATGCATGAAGATATAATCAGTCTATGGGATCAAAGCCTAAAGCCATGTGTAAAATTAACCCCTCTCTGTGTCACGTTAAACTGTAGCAATGCCAACACCAATAGCACCAATAGCACTAGCGCCCCTAGCATGGGCCCTGGAGAAATAAAAAACTGTTCTTTTAATGTTACCACAGAAGTAAGAGATAAAGAAAAGAAAGTCTATGCACTGTTTTATAAACTTGATGTAGTACAAATTAATGAAAGTGACAGTAATAGTACAAAGGATAGTACTCAGTATAGACTAATAAATTGTAATACCTCAGCCATCACACAGGCTTGTCCAAAGGTATCCTTTGAGCCAATTCCTATACATTATTGTGCCCCAGCTGGTTTTGCGATTCTAAAGTGTGAGGATCCGAGATTCAATGGAACAGGACCATGCAATAATGTTAGCTCAGTACAATGTACACATGGAATTATGCCAGTAGCATCAACTCAACTGCTGTTGAATGGCAGTCTAGCAGAAAAAGAGGTGATGATTAGATCTGAAAATATTACAAACAATGCCAAAAACATAATAGTACAGTTTAATGAATCGGTACCAATTACTTGTATCAGACCCAACAACAATACGAGAAAAGGTATACCTATTGGACCAGGACAAGTCTTCTATACAAGTGACATAATAGGGGATATAAGACAAGCATATTGTAGTATCAACAAAACAAAATGGGATGCCTCTTTACAAAAGGTAGCTGAACAATTAAGAAAACACTTCCCTAATAAAACAATAAATTTTACCAAACCCTCAGGAGGGGATCTAGAAATTACAACACATAGTTTTAATTGTGGAGGAGAATTTTTCTATTGTAATACAACAAGCCTGTTTAATAGCACATGGAAGAATGGCGCCACCATACAGGAGAATAGCACGGAGACAAATGGAATTATGACTCTCCCATGCAGAATAAAACAAATTGTAGACATGTGGCAGGAAGTAGGACAAGCAATGTATGCCCCTCCCATTGCAGGAGTAATATATTGTACATCAAACATTACAGGAATAATATTGACAAGAGATGGTGGGAGCAGTAACACCAATAGTGAGATCTTTAGGCCTGGAGGAGGAGATATGAGGGACAATTGGAGAAGTGAATTATATAAGTATAAAGTAGTAAAAATTGAACCACTAGGAGTAGCACCCTCCAGGGCAAAGAGAAGAGTGGTGGAGAGAGAAAAAAGAGCAGTGGGAATAGGAGCTGTTTTCCTTGGGTTCTTGGGAGCTGCAGGAAGCACTATGGGCGCGGCGTCAATAACGCTGACGGTACAGGCCAGACAGTTATTATCTGGCATAGTGCAACAGCAAAGCAATTTGCTGAAGGCTATAGAGGCTCAACAGCATCTGTTGAAACTCACAGTCTGGGGCATTAAACAGCTCCAGGCAAGAGTCCTGGCTCTGGAGAGATACCTACAAGATCAACAGCTCCTGGGAATTTGGGGTTGCTCTGGAAAACTCATCTGCACCACTACTGTGCCCTGGAACTCTAGTTGGAGTAATAAGACTTACGAGGAGATTTGGAACAACATGACCTGGTTGCAATGGGATAGAGAAATTGACAATTACACAAATATAATATACAATCTACTTGAAGAATCGCAGAACCAGCAGGAAAAGAATGAACAAGACTTACTGGCATTAGATAAATGGGCAAGTTTGTGGAATTGGTTTAGCATAACAAACTGGCTGTGGTATATAAGAATATTCATAATGATAGTAGGAGGCTTGATAGGATTAAGAATAGTTATGGCTATAATTTCTGTAGTGAATAGAGTTAGGCAGGGATACTCACCTTTGTCATTTCAGATCCCTACCCCAAACCCAGAGGGTCTCGACAGGCACGGAAGAATCGAAGAAGGAGGTGGAGAGCAAGACAGAACCAGATCGATTCGATTAGTGAGCGGATTCTTGGGACTTGCCTGGGACGACCTACGGAGCCTGTGCCTCTTCAGCTACCACCGATTGAGAGATTGCATCTTGATTGTAGCGAGGACTGTGGAACTTCTGGGACACAGCAGTCTCAAGGGACTGAGACTGGGGTGGGAGGGCCTCAAATATTTGGGGAACCTTCTACTGTATTGGGGTCGGGAATTGAAAAATAGTGCTATTAGTTTACTAAATTCCACAGCAATAGCAGTAGCTGAGTGGACAGATAGGGTTATAGAAATAGGACAAAGAGCTTGCAGAGCTATTCTCAACATACCTAGAAGAATCAGACAGGGCTTCGAAAGAGCTTTACTATAAAATGGGGAACAAGTGGTCAAAAAGTACCATAGTGGGATGGCCTGCTATTAGGGAGAGAATAAGAAGAACTCCTCCAGCAGCAGAAAGAGTAGGGGCAACAAGACAAACTCCCCCAGCAGCAGAAGGAGTAGGAGCAGTGTCTCGAGATTTAACTACACATGGAGCAGTCACAATTGGTAATACAGCAGCCTATAATCCTGATAGCGCCTGGGTAGAAGCGCAAGAAGAGGAGGAGGAAGTAGGCTTCCCAGTCAAGCCACAGGTACCTGTAAGACCAATGACCTTCAAGGGAGCTTTTGATCTCAGCCACTTTTTAAAAGAAAAGGGGGGACTGGATGGGTTAATTTACTCCCAGAAAAGACAAGACATCCTTGATCTGTGGGTCTACAAC
>A2.CD.97.97CDKFE4_AF286240_F1.BR.89.BZ163_AY173958
CCAGCCAAAATTACCCTATAGTGCAGAATGCACAAGGGCAAATGGTACACCAGGCCCTATCACCTAGGACTTTAAATGCATGGGTCAAAGTAGTAGAAGAAAAGGCTTTCAGCCCAGAAGTAATACCCATGTTTTCAGCATTATCAGAAGGAGCCACCCCACAAGATTTAAATACTATGCTAAACACGGTGGGGGGACATCAAGCAGCTATGCAAATATTAAAAGATACCATCAATGAGGAAGCTGCAGAATGGGACAGGCTACATCCAGTACATGCAGGGCCTATTCCACCAGGCCAGATGAGAGAACCAAGGGGAAGTGACATAGCAGGAACTACTAGTACCCTTCAGGAACAAATAGGATGGATGACTAGCAACCCACCTATCCCAGTGGGAGAAATCTATAAAAGATGGATAATCCTGGGATTAAATAAGATAGTAAGAATGTATAGCCCTGTCAGTATTTTGGACATAAGACAAGGGCCAAAAGAACCCTTTAGAGACTATGTAGATAGGTTCTTTAAAACTCTCAGAGCTGAGCAAGCTACACAAGAGGTAAAAAACTGGATGACAGACACCTTGCTGGTCCAAAATGCGAACCCAGATTGTAAATCAATCCTGAAAGCATTAGGACCAGGGGCTACATTAGAAGAAATGATGACAGCATGTCAGGGAGTGGGGGGACCCGGCCATAAAGCAAGGGTTTTGGCTGAAGCAATGAGCCAATTACAAAATGCAACTCCAAACATAATGATGCAGAAAGGCAATTTTAGGGGTCAAAAAAGAATCAAATGTTTCAACTGTGGCAAGGAAGGACACCTAGCCAGAAATTGCAGGGCCCCTAGGAAAAAGGGCTGCTGGAAATGTGGGAAGGAAGGACATCAGATGAAAGACTGCACTGAGAGACAGGCTAATTTTTTAGGGAAAATTTGGCCTTCCCACAAGGGGAGGCCCGGAAATTTCCTTCAGAACAGGCCAGAGCCAACAGCCCCGCCAGCAGAGAGCTTTGGAATGGGGGAAGAGACAAAAAACAGGGAACCGCATACTCCTGCAATTTCCCTCAAATCACTCTTTGGCAGCGACCTCTTGTCACAGTAAAAATAGAAGGACAGCTAAGAGAAGCTCTATTAGATACAGGAGCAGATGATACAGTGTTAGAAGACATAAATTTGCCAGGAAAATGGAAACCAAAAATGATAGGGGGAATTGGAGGTTTTATCAAAGTAAGACAATATGATCAGATAGCTATAGAAATTTGTGGAAAAAGGGCCATAGGTACAGTATTAGTAGGACCTACACCTGTCAACATAATTGGAAGAAATATGTTGGTTCAGCTTGGTTGTACTTTAAATTTTCCAATAAGTCCTATTGAAACTGTACCAGTAAAATTAAAGCCAGGAATGGATGGCCCAAAGGTTAAACAATGGCCATTGACAGAAGAAAAAATAAAAGCATTAACAGAAATTTGTGGAGAAATGGAAAAGGAAGGAAAAATTTCAAAAATTGGGCCTGAAAACCCATACAACACTCCAGTGTTTGCTATAAAGAAAAAAGACAGCACTAAATGGAGAAAATTAGTAGATTTCAGAGAACTCAATAAGAGAACTCAAGACTTTTGGGAAGTTCAGTTAGGAATACCACATCCAGCAGGATTAAAAAAGAAAAAATCAGTAACAGTACTAGATGTGGGGGACGCATATTTTTCCGTTCCCTTAGATGAAGACTTCAGAAAGTATACTGCATTCACCATACCTAGTATAAACAATGAGTCACCAGGAATTAGGTATCAGTACAATGTACTTCCACAGGGATGGAAAGGATCACCATCAATATTCCAGAGTAGCATGACAAAAATTTTAGAGCCCTTTAGATCAAAATATCCAGAGATGGTTATATACCAGTACATGGATGACTTGTATGTAGGATCTGATTTGGAAATAGGTCAGCATAGAGCAAAAATAGAGGAATTAAGGGCTCATTTATTAAGATGGGGATTTACTACACCAGACAAAAAACATCAGAAAGAGCCCCCATTTCTTTGGATGGGATATGAGCTTCATCCTGACAAATGGACAGTCCAGCCTATAAAGCTGCCAGAAAAAGACAGCTGGACTGTCAATGATATACAGAAATTAGTAGGAAAGTTAAATTGGGCAAGTCAGATTTATGCAGGGATTAAAGTAAAGCAACTGTGTAGACTCCTTAGAGGAACCAAAGCACTAACAGACATAGTAACACTGACTAAAGAAGCAGAATTAGAATTGGAAGAGAACAGGGAGATTCTAAAAAACCCTGTACATGGGGTATACTATGACCCATCAAAAGACTTAATAGCAGAAATACAGAAACAAGGGCAAGATCAATGGACATATCAAATTTATCAAGAGCCATTTAAAAATCTAAAAACAGGGAAATATGCAAAAAAGAAATCCACACACACTAATGATGTAAAACAATTAACAGAAGCAGTACAAAAAATAGCCATAGAAAGCATAGTAATATGGGGAAAGACTCCTAAATTTAGATTACCCATACAAAAAGAAACATGGGAGACATGGTGGACGGAGTATTGGCAGGCTACCTGGATTCCTGAGTGGGAGTTTGTCAATACCCCTCCTCTAGTAAAACTATGGTACCAATTAGAAACAGAACCCCTAGCAGGAGCAGAAACTTTCTATGTAGATGGGGCAGCTAATAGAGAGACTAAACTAGGAAAGGCAGGGTATGTCACTGACAGAGGAAGACAAAAAATTGTCTCCCTGACGGAAACAACAAATCAAAAGACTGAATTACATGCAATCTATTTGGCTTTACAGGATTCAGGATTAGAAGTGAACATAGTGACAGATTCACAGTATGCATTAGGAATCATTCAGGCACAACCAGATAGGAGTGAATCAGAGTTAGTCAATCAAATAATAGAAAAGTTAATAGAAAAGGAAAGGGTCTACCTGGCATGGGTACCAGCACACAAAGGGATTGGAGGAAATGAACAGGTAGATAAATTAGTCAGTTCTGGAATCAGGAAAGTGCTATTTTTAGATGGGATAGATAAGGCTCAAGAAGAACATGAAAGATATCACAGTAATTGGAGAGCAATGGCTCAGGACTTTAATCTGCCACCTATAGTAGCAAAAGAAATAGTAGCTAGCTGTGATAAGTGTCAGCTAAAAGGGGAAGCCATGCATGGACAAGTAGATTGTAGTCCAGGAATATGGCAACTAGATTGTACACATCTAGAAGGAAAAGTTATCCTGGTAGCAGTCCATGTAGCCAGTGGCTACATAGAAGCAGAAGTTATTCCAGCAGAGACAGGACAGGAAACAGCATACTTTATATTAAAATTAGCAGGAAGATGGCCAGTAAAAGTGATACATACAGACAATGGGCCCAATTTCACTAGTGCAACAGTCAAGGCAGCCTGTTGGTGGGCAGGTGTCCAACAAGAATTTGGGATTCCCTACAATCCCCAAAGTCAAGGAGTAGTAGAATCTATGAATAAAGAATTAAAGAGAATCATAGGGCAGATAAGAGATCAAGCTGAACACCTTAAGACAGCAGTACAAATGGCAGTATTCATTCACAATTTTAAAAGAAAAGGGGGGATTGGGGGATACAGTGCAGGGGAAAGAATAATAGACATAATAGCAACAGATATACAAACTAAAGAATTACAAAAACAAATTATAAAAATTCAAAATTTTCGGGTTTATTACAGGGACAGCAGGGATCCAATTTGGAAAGGACCAGCAAAACTCCTCTGGAAAGGTGAAGGGGCAGTAGTAATACAAGACAACAGTGATATCAAGGTAGTACCAAGAAGAAAAGCAAAGATCATCAGGGATTATGGAAAACAGATGGCAGGTGATGATTGTGTGGCATGTAGACAGGATGAGGATTAGAACATGGAACAGTTTAGTAAAACATCATATATATGTTTCAAGGAAAGCTAAAGATTGGTCCTATAGACATCACTATGAAAGCAGACATCCAAAAGTAAGTTCAGAAGTACACATCCCGCTAGGGGAGGCTAGATTAGTAGTAAGAACATATTGGGGTCTGCAACCAGGAGAACAAGCCTGGCACTTGGGGCATGGGGTCTCCATAGAATGGAGGCAGAAAAGGTATAGTACACAAATAGACCCTGATCTGGCAGATCATCTAATCCATCTGTATTATTTTGACTGTTTTTCAGAATCTGCCATAAGGAAAGCCATATTAGGAGAAATAGTTAGCCCTAGGTGTGAATATCAAGCAGGACATAACAAGGTAGGATCGCTGCAGTACTTGGCATTGAAAGCATTAGTAGCTCCAACAAGGGCAAAGCCACCTTTACCTAGTGTTAAGAAATTAGTAGAGGATAGATGGAACAAGCCCCAGAAGACCAGGGGCCACAGAGGGAGCCATACAATGAATGGGTGTTAGAACTGTTAGAAGAGCTCAAGCAGGAGGCTGTTAGACATTTCCCTGGGCAGTGGCTACACGGCCTAGGACAACATATCTATAATACCTATGGGGATACTTGGGAAGGAGTTGAAGCTATAACAAGAACTCTGCAACAACTACTGTTTGTCCATTTCAGAATGGGGTGCCATCATAGCAGGATAGGTGTTACGCGACAGAGGAGAGCAAGGAATGGATCCAGTAGACCCTAAATTAGAGCCCTGGAACCATCCGGGAAGTCAGCCTAAAACTGCTTGTACCAAGTGTTATTGTAAAAAGTGTTGCTATCATTGCCCAGTGTGCTTTCTAAACAAGGGCTTAGGCATCTCCTATGGCAGGAAGAAGCGGAGACACCGACGAGGACCTGCTCAAAGCAGTAAGAATCATCAAAATCCTGTACCAAAGCAGTAAGTAGTAGTAATTAATAGATGTAATGATACCTTTAGCAATTTTGTCAATAGTAGGGCTGATAGTAGCATTAATCTTAGCAATAGTTATATGGACTATAGTATTTATAGAATATAGGAAAATTCAGAAGGAAAGGAAAATAGACAGGCTAATCAAGAGAATAAGTGAAAGAGCAGAAGACAGTGGCAATGAGAGTGATGGGGATACAGAGGAATTGTCCACCCTTATGGGGGTGGGAATCTTGCTTTTT
>A2.CD.97.97CDKFE4_AF286240_F2.CM.97.CM53657_AF377956
CCAGCCAAAATTACCCTATAGTGCAGAATGCACAAGGGCAAATGGTACACCAGGCCCTATCACCTAGGACTTTAAATGCATGGGTCAAAGTAGTAGAAGAAAAGGCTTTCAGCCCAGAAGTAATACCCATGTTTTCAGCATTATCAGAAGGAGCCACCCCACAAGATTTAAACACCATGCTAAACACAGTGGGGGGACATCAAGCAGCCATGCAAATGTTAAAAGATACCATCAATGAGGAAGCTGCAGAATGGGACAGGCTACATCCAGTACATGCAGGGCCTATTCCACCAGGCCAGATGAGAGAACCAAGGGGAAGTGACATAGCAGGAACTACTAGTACCCTTCAGGAACAAATAGGATGGATGACTAGCAACCCACCTATCCCAGTGGGAGAAATCTATAAAAGATGGATAATCCTGGGATTAAATAAGATAGTAAGAATGTATAGCCCTGTCAGTATTTTGGACATAAGACAAGGGCCAAAAGAACCCTTTAGAGACTATGTAGATAGGTTCTTTAAAACTCTCAGAGCTGAGCAAGCTACACAAGAGGTAAAAAACTGGATGACAGACACCTTGCTGGTCCAAAATGCGAACCCAGATTGTAAATCAATCCTGAAAGCATTAGGACCAGGGGCTACATTAGAAGAAATGATGACAGCATGTCAGGGAGTGGGGGGACCCGGCCATAAAGCAAGGGTTTTGGCTGAAGCAATGAGCCAATTACAAAATGCAACTCCAAACATAATGATGCAGAAAGGCAATTTTAGGGGTCAAAAAAGAATCAAATGTTTCAACTGTGGCAAGGAAGGACACCTAGCCAGAAATTGCAGGGCCCCTAGGAAAAAGGGCTGCTGGAAATGTGGGAAGGAAGGACATCAGATGAAAGACTGCACTGAGAGACAGGCTAATTTTTTAGGGAAAATTTGGCCTCCCAACAGAGGGAGGCCAGGAAATTTTCCCCAGAGCAGACCAGAGCCAACAGCCCCACCAGCAGAGGACTTTGGAATGGGGGAAGAGACAAAAAACAGGGAACCGCATACTCCTGCAATTTCCCTCAAATCACTCTTTGGCAGCGACCTCTTGTCACAGTAAAAATAGAAGGACAGCTAAGAGAAGCTCTATTAGATACAGGAGCAGATGATACAGTGTTAGAAGACATAAATTTGCCAGGAAAATGGAAACCAAAAATGATAGGGGGAATTGGAGGTTTTATCAAAGTAAGACAATATGATCAGATAGCTATAGAAATTTGTGGAAAAAGGGCCATAGGTACAGTATTAGTAGGACCTACACCTGTCAACATAATTGGAAGAAATATGTTGGTTCAGCTTGGTTGTACTTTAAATTTTCCAATAAGTCCTATTGAAACTGTACCAGTAAAATTAAAGCCAGGAATGGATGGCCCAAAGGTTAAACAATGGCCATTGACAGAAGAAAAAATAAAAGCATTAACAGAAATTTGTGGAGAAATGGAAAAGGAAGGAAAAATTTCAAAAATTGGGCCTGAAAACCCATACAACACTCCAGTGTTTGCTATAAAGAAAAAAGACAGCACTAAATGGAGAAAATTAGTAGATTTCAGAGAACTCAATAAGAGAACTCAAGACTTTTGGGAAGTTCAGTTAGGAATACCACATCCAGCAGGATTAAAAAAGAAAAAATCAGTAACAGTACTAGATGTGGGGGACGCATATTTTTCCGTTCCCTTAGATGAAGACTTCAGAAAGTATACTGCATTCACCATACCTAGTATAAACAATGAGTCACCAGGAATTAGGTATCAGTACAATGTACTTCCACAGGGATGGAAAGGATCACCATCAATATTCCAGAGTAGCATGACAAAAATTTTAGAGCCCTTTAGATCAAAATATCCAGAGATGGTTATATACCAGTACATGGATGACTTGTATGTAGGATCTGATTTGGAAATAGGTCAGCATAGAGCAAAAATAGAGGAATTAAGGGCTCATTTATTAAGATGGGGATTTACTACACCAGACAAAAAACATCAGAAAGAGCCCCCATTTCTTTGGATGGGATATGAGCTTCATCCTGACAAATGGACAGTCCAGCCTATAAAGCTGCCAGAAAAAGACAGCTGGACTGTCAATGATATACAGAAATTAGTAGGAAAGTTAAATTGGGCAAGTCAGATTTATGCAGGGATTAAAGTAAAGCAACTGTGTAGACTCCTTAGAGGAACCAAAGCACTAACAGACATAGTAACACTGACTAAAGAAGCAGAATTAGAATTGGAAGAGAACAGGGAGATTCTAAAAAACCCTGTACATGGGGTATACTATGACCCATCAAAAGACTTAATAGCAGAAATACAGAAACAAGGGCAAGATCAATGGACATATCAAATTTATCAAGAGCCATTTAAAAATCTAAAAACAGGGAAATATGCAAAAAAGAAATCCACACACACTAATGATGTAAAACAATTAACAGAAGCAGTACAAAAAATAGCCATAGAAAGCATAGTAATATGGGGAAAGACTCCTAAATTTAGATTACCCATACAAAAAGAAACATGGGAGACATGGTGGACGGAGTATTGGCAGGCTACCTGGATTCCTGAGTGGGAGTTTGTCAATACCCCTCCTCTAGTAAAACTATGGTACCAATTAGAAACAGAACCCCTAGCAGGAGCAGAAACTTTCTATGTAGATGGGGCAGCTAATAGAGAGACTAAACTAGGAAAGGCAGGGTATGTCACTGACAGAGGAAGACAAAAAATTGTCTCCCTGACGGAAACAACAAATCAAAAGACTGAATTACATGCAATCTATTTGGCTTTACAGGATTCAGGATTAGAAGTGAACATAGTGACAGATTCACAGTATGCATTAGGAATCATTCAGGCACAACCAGATAGGAGTGAATCAGAGTTAGTCAATCAAATAATAGAAAAGTTAATAGAAAAGGAAAGGGTCTACCTGGCATGGGTACCAGCACACAAAGGGATTGGAGGAAATGAACAGGTAGATAAATTAGTCAGTTCTGGAATCAGGAAAGTGCTATTTTTAGATGGGATAGATAAGGCTCAAGAAGAACATGAAAGATATCACAGTAATTGGAGAGCAATGGCTCAGGACTTTAATCTGCCACCTATAGTAGCAAAAGAAATAGTAGCTAGCTGTGATAAGTGTCAGCTAAAAGGGGAAGCCATGCATGGACAAGTAGATTGTAGTCCAGGAATATGGCAACTAGATTGTACACATCTAGAAGGAAAAGTTATCCTGGTAGCAGTCCATGTAGCCAGTGGCTACATAGAAGCAGAAGTTATTCCAGCAGAGACAGGACAGGAAACAGCATACTTTATATTAAAATTAGCAGGAAGATGGCCAGTAAAAGTGATACATACAGACAATGGGCCCAATTTCACTAGTGCAACAGTCAAGGCAGCCTGTTGGTGGGCAGGTGTCCAACAAGAATTTGGGATTCCCTACAATCCCCAAAGTCAAGGAGTAGTAGAATCTATGAATAAAGAATTAAAGAGAATCATAGGGCAGATAAGAGATCAAGCTGAACACCTTAAGACAGCAGTACAAATGGCAGTATTCATTCACAATTTTAAAAGAAAAGGGGGGATTGGGGGATACAGTGCAGGGGAAAGAATAATAGACATAATAGCAACAGATATACAAACTAAAGAATTACAAAAACAAATTATAAAAATTCAAAATTTTCGGGTTTATTACAGGGACAGCAGGGATCCAATTTGGAAAGGACCAGCAAAACTCCTCTGGAAAGGTGAAGGGGCAGTAGTAATACAAGACAACAGTGATATCAAGGTAGTACCAAGAAGAAAAGCAAAGATCATCAGGGATTATGGAAAACAGATGGCAGGTGATGATTGTGTGGCATGTAGACAGGATGAGGATTAGAACATGGAACAGTTTAGTAAAACATCATATATATGTTTCAAGGAAAGCTAAAGATTGGTCCTATAGACATCACTATGAAAGCAGACATCCAAAAGTAAGTTCAGAAGTACACATCCCGCTAGGGGAGGCTAGATTAGTAGTAAGAACATATTGGGGTCTGCAACCAGGAGAACAAGCCTGGCACTTGGGGCATGGGGTCTCCATAGAATGGAGGCAGAAAAGGTATAGTACACAAATAGACCCTGATCTGGCAGATCATCTAATCCATCTGTATTATTTTGACTGTTTTTCAGAATCTGCCATAAGGAAAGCCATATTAGGAGAAATAGTTAGCCCTAGGTGTGAATATCAAGCAGGACATAACAAGGTAGGATCGCTGCAGTACTTGGCATTGAAAGCATTAGTAGCTCCAACAAGGGCAAAGCCACCTTTACCTAGTGTTAAGAAATTAGTAGAGGATAGATGGAACAAGCCCCAGAAGACCAGGGGCCACAGAGGGAGCCATACAATGAATGGGTGTTAGAACTGTTAGAAGAGCTCAAGCAGGAGGCTGTTAGACATTTCCCTGGGCAGTGGCTACACGGCCTAGGACAACATATCTATAATACCTATGGGGATACTTGGGAAGGAGTTGAAGCTATAACAAGAACTCTGCAACAACTACTGTTTGTCCATTTCAGAATGGGGTGCCATCATAGCAGGATAGGTGTTACGCGACAGAGGAGAGCAAGGAATGGATCCAGTAGACCCTAAATTAGAGCCCTGGAACCATCCGGGAAGTCAGCCTAAAACTGCTTGTACCAAGTGTTATTGTAAAAAGTGTTGCTATCATTGCCCAGTGTGCTTTCTAAACAAGGGCTTAGGCATCTCCTATGGCAGGAAGAAGCGGAGACACCGACGAGGACCTGCTCAAAGCAGTAAGAATCATCAAAATCCTGTACCAAAGCAGTAAGTAGTAGTAATTAATAGATGTAATGATACCTTTAGCAATTTTGTCAATAGTAGGGCTGATAGTAGCATTAATCTTAGCAATAGTTATATGGACTATAGTATTTATAGAATATAGGAAAATTCAGAAGGAAAGGAAAATAGACAGGCTAATCAAGAGAATAAGTGAAAGAGCAGAAGACAGTGGCAATGAGAGTGATGGGGATACAGAGGAATTGTCCACCCTTATGGGGGTGGGAATCTTGCTTTTT
>A2.CD.97.97CDKS10_AF286241_G.KE.93.HH8793_12_1_AF061641
AGCTATAAGAGAGACTTAATTAGGAAAAGCAGGATTTGTCACTGACAGAGGAAGACAAAAAATTGTCTCCCTGACGGAGACAACAAATCAAAAGACTGAATTACATGCAATCTATTTAGCTTTACAGGATTCAGAATTAGAAGTAAACATAGTAACAGATTCACAGTATGCATTAGGAATCATTCAGGCACAACCAGATAGGAGTGAATCAGAGTTAGTCAATCAAATAATAGAAAAGTTAATAGAAAAAGAGAGGGTCTACCTGTCATGGGTACCAGCACACAAGGGGATTGGAGGAAATGAACAGGTAGACAAATTAGTCAGTTCTGGAATCAGGAAAGTGTTATTTTTAGATGGAATAGATAAAGCTCAAGAAGAACATGAAAGATATCACAGCAATTGGAGAGCCATGGCTCATGACTTTAATCTGCCACCTATAGTAGCAAAAGAAATAGTAGCTAGTTGTGACAAATGTCAGCTAAAAGGGGAAGCCATGCATGGACAAGTAGACTGTAGCCCAGGAATATGGCAACTAGATTGCACACATCTAGAAGGAAAAGTTATCCTGGTAGCAGTCCATGTAGCCAGTGGCTATATAGAAGCAGAAGTCATTCCAGCAGAAACAGGACAGGAAACAGCATACTTTATATTAAAACTAGCAGGAAGATGGCCAGTAAAAGTAATACATACTGACAATGGGTCCAATTTCACCAGTGCAACAGTTAAGGCAGCCTGTTGGTGGGCAGGAGTCCAACAGGAATTTGGAATTCCCTACAATCCCCAAAGTCAAGGAGTAGTGGAATCTATGAACAAAGAATTAAAGAAAATCATAGGGCAAGTAAGAGACCAAGCTGAACACCTTAAGACAGCAGTACAAATGGCAGTATTCATCCACAATTTTAAAAGAAAAGGGGGGATTGGGGGATACAGTGCAGGGGAAAGAATAATAGACATAATAGCAACAGATATACATACTAAAGAATTACATTTACAAATTATGAAAATTTAAAATTTTCGGGTTTATTACAGAGACAGCATAGATCCCATTTGGAAAGGACCAGCAAAACTCCTCTGGAAAGGTGAAGGGGCAGTAGTAATACAAGACAATAGTGAGATAAAGGTAGTACCAAGAAGAAAAGCAAAGATCATTAGGGATTATGGAAAACAGATGGCAGGTGATGATTGTGTGGCAGGTAGACAGGATGAGGATTAGAACATGGAACAGTTTAGTAAAACATCATATGTATATTTCAAAGAAAGCTAAAAAGTGGTTCTATAGACATCACTATGAAAGTAGACATCCGAGAGTAAGTTCAGAAGTACACATCCCGTTAGGGGAGGCTACATTAATAGTAAGAACATATTGGGGTCTGCACCCAGGAGAGAAAGAATGGCAATTGGGTCATGGGGTCTCCATAGAATGGAGGCAGAAGAGGTATAGTACACAAATAGACCCTGATCTGGCAGACCATCTAATCCATCTGTATTATTTTGACTGTTTTTCAGAATCTGCCATAAGGAAAGCCATATTAGGAGAAATAGTTAGTCCTAGGTGCGAATATCAAGCAGGACATAACAAGGTAGGATCTCTGCAATATTTGGCATTGAAAGCATTAGTAGTCCCAAACAAGGCAAGGCCACCCTTGCCTAGTGTTAGGAAATTAGTAGAGGATAGATGGAACAAGCCCCGGAAGACCAGGGGCCACCGAGGGAGCCACACAATGAATGGGTGCTAGAACTATTAGAGGAGCTCAAGCAGGAAGCTGTTAGGCATTTCCCTCGGCAGTGGCTACATGGCCTAGGACAACTTATATATAGTACCTATGGGGATACTTGGGAAGGAGTTGAAGCTATAATAAGAACTTTGCAACAACTGCTGTTTGTCCATTTCAGAATTGGGTGCCGACATAGCAGAATAGGCATTTCGAAGAAGAAGAGTAAGGATGGAGCCAGTAGATCCTAAACTAGAGCCCTGGAACCATCCGGGAAGCCAGCCTAAAACTGCTTGTAACAAGTGCTATTGTAAAAAGTGTTGCTATCATTGCCAGCTGTGCTTTTTAAACAAAGGCTTAGGCATCTCCTATGGCAGGAAGAAGCGGAGACCCCGACGAGGACCTTCTCAGAGCAGTAAAGATCATCAAAATCCTATACCAAAGCAGTAAGTAGTGGTAATTAATAATGTAATGTTGTCCTTAGAAATAGCTGCAATAGTAGGACTGGTAGTAGCATTAATCGCAGCAATAGTTGTATGGACTATAGTATTTATAGAATATAGGAAGATTAGGGAGCAAAGGAAAATAGACTGGTTAATCCAAAGAATAAGTGAAAGAGCAGAAGACAGTGGCAATGAGAGTGATGGGGACACAGACGAGTTATCAGCACTTGTGGAGATGGGGAATCTTAATTTTGGGGATGCTAATAATTTGTAAAGCTACAGATTGGTGGGTCACAGTATACTATGGAGTACCTGTGTGGAAAGATGCAGAAACCACCTTATTTTGCGCATCAGATGATAAAGCATATGAGACAGAAGCGCATAATGTCTGGGCCACACATGCCTGTGTACCCACAGACCCCAACCCACAAGAAGTAAACCTAAAAAATGTGACAGAAGATTTTAACATGTGGAAAAATAATATGGTAGAGCAGATGCATGAAGATATAATCAGTCTATGGGATCAAAGCCTAAAGCCATGTGTAAAATTAACCCCTCTCTGTGTCACGTTAAACTGTAGCAATGCCAACACCAATAGCACCAATAGCACTAGCGCCCCTAGCATGGGCCCTGGAGAAATAAAAAACTGTTCTTTTAATGTTACCACAGAAGTAAGAGATAAAGAAAAGAAAGTCTATGCACTGTTTTATAAACTTGATGTAGTACAAATTAATGAAAGTGACAGTAATAGTACAAAGGATAGTACTCAGTATAGACTAATAAATTGTAATACCTCAGCCATCACACAGGCTTGTCCAAAGGTATCCTTTGAGCCAATTCCTATACATTATTGTGCCCCAGCTGGTTTTGCGATTCTAAAGTGTGAGGATCCGAGATTCAATGGAACAGGACCATGCAATAATGTTAGCTCAGTACAATGTACACATGGAATTATGCCAGTAGCATCAACTCAACTGCTGTTGAATGGCAGTCTAGCAGAAAAAGAGGTGATGATTAGATCTGAAAATATTACAAACAATGCCAAAAACATAATAGTACAGTTTAATGAATCGGTACCAATTACTTGTATCAGACCCAACAACAATACGAGAAAAGGTATACCTATTGGACCAGGACAAGTCTTCTATACAAGTGACATAATAGGGGATATAAGACAAGCATATTGTAGTATCAACAAAACAAAATGGGATGCCTCTTTACAAAAGGTAGCTGAACAATTAAGAAAACACTTCCCTAATAAAACAATAAATTTTACCAAACCCTCAGGAGGGGATCTAGAAATTACAACACATAGTTTTAATTGTGGAGGAGAATTTTTCTATTGTAATACAACAAGCCTGTTTAATAGCACATGGAAGAATGGCGCCACCATACAGGAGAATAGCACGGAGACAAATGGAATTATGACTCTCCCATGCAGAATAAAACAAATTGTAGACATGTGGCAGGAAGTAGGACAAGCAATGTATGCCCCTCCCATTGCAGGAGTAATATATTGTACATCAAACATTACAGGAATAATATTGACAAGAGATGGTGGGAGCAGTAACACCAATAGTGAGATCTTTAGGCCTGGAGGAGGAGATATGAGGGACAATTGGAGAAGTGAATTATATAAGTATAAAGTAGTAAAAATTGAACCACTAGGAGTAGCACCCTCCAGGGCAAAGAGAAGAGTGGTGGAGAGAGAAAAAAGAGCAGTGGGAATAGGAGCTGTTTTCCTTGGGTTCTTGGGAGCTGCAGGAAGCACTATGGGCGCGGCGTCAATAACGCTGACGGTACAGGCCAGACAGTTATTATCTGGCATAGTGCAACAGCAAAGCAATTTGCTGAAGGCTATAGAGGCTCAACAGCATCTGTTGAAACTCACAGTCTGGGGCATTAAACAGCTCCAGGCAAGAGTCCTGGCTCTGGAGAGATACCTACAAGATCAACAGCTCCTGGGAATTTGGGGTTGCTCTGGAAAACTCATCTGCACCACTACTGTGCCCTGGAACTCTAGTTGGAGTAATAAGACTTACGAGGAGATTTGGAACAACATGACCTGGTTGCAATGGGATAGAGAAATTGACAATTACACAAATATAATATACAATCTACTTGAAGAATCGCAGAACCAGCAGGAAAAGAATGAACAAGACTTACTGGCATTAGATAAATGGGCAAGTTTGTGGAATTGGTTTAGCATAACAAACTGGCTGTGGTATATAAGAATATTCATAATGATAGTAGGAGGCTTGATAGGATTAAGAATAGTTATGGCTATAATTTCTGTAGTGAATAGAGTTAGGCAGGGATACTCACCTTTGTCATTTCAGATCCCTACCCCAAACCCAGAGGGTCTCGACAGGCACGGAAGAATCGAAGAAGGAGGTGGAGAGCAAGACAGAACCAGATCGATTCGATTAGTGAGCGGATTCTTGGGACTTGCCTGGGACGACCTACGGAGCCTGTGCCTCTTCAGCTACCACCGATTGAGAGATTGCATCTTGATTGTAGCGAGGACTGTGGAACTTCTGGGACACAGCAGTCTCAAGGGACTGAGACTGGGGTGGGAGGGCCTCAAATATTTGGGGAACCTTCTACTGTATTGGGGTCGGGAATTGAAAAATAGTGCTATTAGTTTACTAAATTCCACAGCAATAGCAGTAGCTGAGTGGACAGATAGGGTTATAGAAATAGTACAACGAGCTTTTAGGGCTTTTCTTAACATACCCACAAGGATAAGACAAGGCTTAGAAAGAGCTTTGCTATAAAATGGGAGGCAAGTGGTCAAAAAGTACCATAGTGGGATGGCCTGCTATTAGGGAGAGAATAAGAAGAACTCCTCCAGCAGCAGAAAGAGTAGGGGCAACAAGACAAACTCCCCCAGCAGCAGAAGGAGTAGGAGCAGTGTCTCGAGATTTAACTACACATGGAGCAGTCACAATTGGTAATACAGCAGCCTATAATCCTGATAGCGCCTGGGTAGAAGCGCAAGAAGAGGAGGAGGAAGTAGGCTTCCCAGTCAAGCCACAGGTACCTGTAAGACCAATGACCTTCAAGGGAGCTTTTGATCTCAGCCACTTTTTAAAAGAAAAGGGGGGACTGGATGGGTTAATTTACTCCCAGAAAAGACAAGACATCCTTGATCTGTGGGTCTACAAC
>A2.CD.97.97CDKS10_AF286241_H.BE.93.VI991_AF190127
AGCTATAAGAGAGACTTAATTAGGAAAAGCAGGATTTGTCACTGACAGAGGAAGACAAAAAATTGTCTCCCTGACGGAGACAACAAATCAAAAGACTGAATTACATGCAATCTATTTAGCTTTACAGGATTCAGAATTAGAAGTAAACATAGTAACAGATTCACAGTATGCATTAGGAATCATTCAGGCACAACCAGATAGGAGTGAATCAGAGTTAGTCAATCAAATAATAGAAAAGTTAATAGAAAAAGAGAGGGTCTACCTGTCATGGGTACCAGCACACAAGGGGATTGGAGGAAATGAACAGGTAGACAAATTAGTCAGTTCTGGAATCAGGAAAGTGTTATTTTTAGATGGAATAGATAAAGCTCAAGAAGAACATGAAAGATATCACAGCAATTGGAGAGCCATGGCTCATGACTTTAATCTGCCACCTATAGTAGCAAAAGAAATAGTAGCTAGTTGTGACAAATGTCAGCTAAAAGGGGAAGCCATGCATGGACAAGTAGACTGTAGCCCAGGAATATGGCAACTAGATTGCACACATCTAGAAGGAAAAATTATTCTGGTAGCAGTCCATGTAGCCAGTGGCTATATAGAAGCAGAAGTTATCCCAGCAGAAACAGGACAGGAAACAGCATACTTTATATTGAAACTAGCAGGAAGATGGCCAGTAAAAGTAATACATACTGACAATGGGTCCAATTTCACCAGTGCAACAGTTAAGGCAGCCTGTTGGTGGGCAGGAGTCCAACAGGAATTTGGAATTCCCTACAATCCCCAAAGTCAAGGAGTAGTGGAATCTATGAACAAAGAATTAAAGAAAATCATAGGGCAAGTAAGAGACCAAGCTGAACACCTTAAGACAGCAGTACAAATGGCAGTATTCATCCACAATTTTAAAAGAAAAGGGGGGATTGGGGGATACAGTGCAGGGGAAAGAATAATAGACATAATAGCAACAGATATACATACTAAAGAATTACATTTACAAATTATGAAAATTTAAAATTTTCGGGTTTATTACAGAGACAGCATAGATCCCATTTGGAAAGGACCAGCAAAACTCCTCTGGAAAGGTGAAGGGGCAGTAGTAATACAAGACAATAGTGAGATAAAGGTAGTACCAAGAAGAAAAGCAAAGATCATTAGGGATTATGGAAAACAGATGGCAGGTGATGATTGTGTGGCAGGTAGACAGGATGAGGATTAGAACATGGAACAGTTTAGTAAAACATCATATGTATATTTCAAAGAAAGCTAAAAAGTGGTTCTATAGACATCACTATGAAAGTAGACATCCGAGAGTAAGTTCAGAAGTACACATCCCGTTAGGGGAGGCTACATTAATAGTAAGAACATATTGGGGTCTGCACCCAGGAGAGAAAGAATGGCAATTGGGTCATGGGGTCTCCATAGAATGGAGGCAGAAGAGGTATAGTACACAAATAGACCCTGATCTGGCAGACCATCTAATCCATCTGTATTATTTTGACTGTTTTTCAGAATCTGCCATAAGGAAAGCCATATTAGGAGAAATAGTTAGTCCTAGGTGCGAATATCAAGCAGGACATAACAAGGTAGGATCTCTGCAATATTTGGCATTGAAAGCATTAGTAGTCCCAAACAAGGCAAGGCCACCCTTGCCTAGTGTTAGGAAATTAGTAGAGGATAGATGGAACAAGCCCCGGAAGACCAGGGGCCACCGAGGGAGCCACACAATGAATGGGTGCTAGAACTATTAGAGGAGCTCAAGCAGGAAGCTGTTAGGCATTTCCCTCGGCAGTGGCTACATGGCCTAGGACAACTTATATATAGTACCTATGGGGATACTTGGGAAGGAGTTGAAGCTATAATAAGAACTTTGCAACAACTGCTGTTTGTCCATTTCAGAATTGGGTGCCGACATAGCAGAATAGGCATTTCGAAGAAGAAGAGTAAGGATGGAGCCAGTAGATCCTAAACTAGAGCCCTGGAACCATCCGGGAAGCCAGCCTAAAACTGCTTGTAACAAGTGCTATTGTAAAAAGTGTTGCTATCATTGCCAGCTGTGCTTTTTAAACAAAGGCTTAGGCATCTCCTATGGCAGGAAGAAGCGGAGACCCCGACGAGGACCTTCTCAGAGCAGTAAAGATCATCAAAATCCTATACCAAAGCAGTAAGTAGTGGTAATTAATAATGTAATGTTGTCCTTAGAAATAGCTGCAATAGTAGGACTGGTAGTAGCATTAATCGCAGCAATAGTTGTATGGACTATAGTATTTATAGAATATAGGAAGATTAGGGAGCAAAGGAAAATAGACTGGTTAATCCAAAGAATAAGTGAAAGAGCAGAAGACAGTGGCAATGAGAGTGATGGGGACACAGACGAGTTATCAGCACTTGTGGAGATGGGGAATCTTAATTTTGGGGATGCTAATAATTTGTAAAGCTACAGATTGGTGGGTCACAGTATACTATGGAGTACCTGTGTGGAAAGATGCAGAAACCACCTTATTTTGCGCATCAGATGATAAAGCATATGAGACAGAAGCGCATAATGTCTGGGCCACACATGCCTGTGTACCCACAGACCCCAACCCACAAGAAGTAAACCTAAAAAATGTGACAGAAGATTTTAACATGTGGAAAAATAATATGGTAGAGCAGATGCATGAAGATATAATCAGTCTATGGGATCAAAGCCTAAAGCCATGTGTAAAATTAACCCCTCTCTGTGTCACGTTAAACTGTAGCAATGCCAACACCAATAGCACCAATAGCACTAGCGCCCCTAGCATGGGCCCTGGAGAAATAAAAAACTGTTCTTTTAATGTTACCACAGAAGTAAGAGATAAAGAAAAGAAAGTCTATGCACTGTTTTATAAACTTGATGTAGTACAAATTAATGAAAGTGACAGTAATAGTACAAAGGATAGTACTCAGTATAGACTAATAAATTGTAATACCTCAGCCATCACACAGGCTTGTCCAAAGGTATCCTTTGAGCCAATTCCTATACATTATTGTGCCCCAGCTGGTTTTGCGATTCTAAAGTGTGAGGATCCGAGATTCAATGGAACAGGACCATGCAATAATGTTAGCTCAGTACAATGTACACATGGAATTATGCCAGTAGCATCAACTCAACTGCTGTTGAATGGCAGTCTAGCAGAAAAAGAGGTGATGATTAGATCTGAAAATATTACAAACAATGCCAAAAACATAATAGTACAGTTTAATGAATCGGTACCAATTACTTGTATCAGACCCAACAACAATACGAGAAAAGGTATACCTATTGGACCAGGACAAGTCTTCTATACAAGTGACATAATAGGGGATATAAGACAAGCATATTGTAGTATCAACAAAACAAAATGGGATGCCTCTTTACAAAAGGTAGCTGAACAATTAAGAAAACACTTCCCTAATAAAACAATAAATTTTACCAAACCCTCAGGAGGGGATCTAGAAATTACAACACATAGTTTTAATTGTGGAGGAGAATTTTTCTATTGTAATACAACAAGCCTGTTTAATAGCACATGGAAGAATGGCGCCACCATACAGGAGAATAGCACGGAGACAAATGGAATTATGACTCTCCCATGCAGAATAAAACAAATTGTAGACATGTGGCAGGAAGTAGGACAAGCAATGTATGCCCCTCCCATTGCAGGAGTAATATATTGTACATCAAACATTACAGGAATAATATTGACAAGAGATGGTGGGAGCAGTAACACCAATAGTGAGATCTTTAGGCCTGGAGGAGGAGATATGAGGGACAATTGGAGAAGTGAATTATATAAGTATAAAGTAGTAAAAATTGAACCACTAGGAGTAGCACCCTCCAGGGCAAAGAGAAGAGTGGTGGAGAGAGAAAAAAGAGCAGTGGGAATAGGAGCTGTTTTCCTTGGGTTCTTGGGAGCTGCAGGAAGCACTATGGGCGCGGCGTCAATAACGCTGACGGTACAGGCCAGACAGTTATTATCTGGCATAGTGCAACAGCAAAGCAATTTGCTGAAGGCTATAGAGGCTCAACAGCATCTGTTGAAACTCACAGTCTGGGGCATTAAACAGCTCCAGGCAAGAGTCCTGGCTCTGGAGAGATACCTACAAGATCAACAGCTCCTGGGAATTTGGGGTTGCTCTGGAAAACTCATCTGCACCACTACTGTGCCCTGGAACTCTAGTTGGAGTAATAAGACTTACGAGGAGATTTGGAACAACATGACCTGGTTGCAATGGGATAGAGAAATTGACAATTACACAAATATAATATACAATCTACTTGAAGAATCGCAGAACCAGCAGGAAAAGAATGAACAAGACTTACTGGCATTAGATAAATGGGCAAGTTTGTGGAATTGGTTTAGCATAACAAACTGGCTGTGGTATATAAGAATATTCATAATGATAGTAGGAGGCTTGATAGGATTAAGAATAGTTATGGCTATAATTTCTGTAGTGAATAGAGTTAGGCAGGGATACTCACCTTTGTCATTTCAGATCCCTACCCCAAACCCAGAGGGTCTCGACAGGCACGGAAGAATCGAAGAAGGAGGTGGAGAGCAAGACAGAACCAGATCGATTCGATTAGTGAGCGGATTCTTGGGACTTGCCTGGGACGACCTACGGAGCCTGTGCCTCTTCAGCTACCACCGATTGAGAGATTGCATCTTGATTGTAGCGAGGACTGTGGAACTTCTGGGACACAGCAGTCTCAAGGGACTGAGACTGGGGTGGGAGGGCCTCAAATATTTGGGGAACCTTCTACTGTATTGGGGTCGGGAATTGAAAAATAGTGCTATTAGTTTACTAAATTCCACAGCAATAGCAGTAGCTGAGTGGACAGATAGGGTTATAGAAATAGGACAAAGAGCTTGCAGAGCTATTCTCAACATACCTAGAAGAATCAGACAGGGCTTCGAAAGAGCTTTACTATAAAATGGGGAACAAGTGGTCAAAAAGTACCATAGTGGGATGGCCTGCTATTAGGGAGAGAATAAGAAGAACTCCTCCAGCAGCAGAAAGAGTAGGGGCAACAAGACAAACTCCCCCAGCAGCAGAAGGAGTAGGAGCAGTGTCTCGAGATTTAACTACACATGGAGCAGTCACAATTGGTAATACAGCAGCCTATAATCCTGATAGCGCCTGGGTAGAAGCGCAAGAAGAGGAGGAGGAAGTAGGCTTCCCAGTCAAGCCACAGGTACCTGTAAGACCAATGACCTTCAAGGGAGCTTTTGATCTCAGCCACTTTTTAAAAGAAAAGGGGGGACTGGATGGGTTAATTTACTCCCAGAAAAGACAAGACATCCTTGATCTGTGGGTCTACAAC
>A2.CD.97.97CDKS10_AF286241_J.SE.94.SE7022_AF082395
AGCTATAAGAGAGACTTAATTAGGAAAAGCAGGATTTGTCACTGACAGAGGAAGACAAAAAATTGTCTCCCTGACGGAGACAACAAATCAAAAGACTGAATTACATGCAATCTATTTAGCTTTACAGGATTCAGAATTAGAAGTAAACATAGTAACAGATTCACAGTATGCATTAGGAATCATTCAGGCACAACCAGATAGGAGTGAATCAGAGTTAGTCAATCAAATAATAGAAAAGTTAATAGAAAAAGAGAGGGTCTACCTGTCATGGGTACCAGCACACAAGGGGATTGGAGGAAATGAACAGGTAGACAAATTAGTCAGTTCTGGAATCAGGAAAGTGTTATTTTTAGATGGAATAGATAAAGCTCAAGAAGAACATGAAAGATATCACAGCAATTGGAGAGCCATGGCTCATGACTTTAATCTGCCACCTATAGTAGCAAAAGAAATAGTAGCTAGTTGTGACAAATGTCAGCTAAAAGGGGAAGCCATGCATGGACAAGTAGACTGTAGCCCAGGAATATGGCAACTAGATTGCACACATCTAGAAGGAAAAGTTATCCTGGTAGCAGTCCATGTAGCCAGTGGCTATATAGAAGCAGAAGTCATTCCAGCAGAAACAGGACAGGAAACAGCATACTTTATATTAAAACTAGCAGGAAGATGGCCAGTAAAAGTAATACATACTGACAATGGGTCCAATTTCACCAGTGCAACAGTTAAGGCAGCCTGTTGGTGGGCAGGAGTCCAACAGGAATTTGGAATTCCCTACAATCCCCAAAGTCAAGGAGTAGTGGAATCTATGAACAAAGAATTAAAGAAAATCATAGGGCAAGTAAGAGACCAAGCTGAACACCTTAAGACAGCAGTACAAATGGCAGTATTCATCCACAATTTTAAAAGAAAAGGGGGGATTGGGGGATACAGTGCAGGGGAAAGAATAATAGACATAATAGCAACAGATATACATACTAAAGAATTACATTTACAAATTATGAAAATTTAAAATTTTCGGGTTTATTACAGAGACAGCATAGATCCCATTTGGAAAGGACCAGCAAAACTCCTCTGGAAAGGTGAAGGGGCAGTAGTAATACAAGACAATAGTGAGATAAAGGTAGTACCAAGAAGAAAAGCAAAGATCATTAGGGATTATGGAAAACAGATGGCAGGTGATGATTGTGTGGCAGGTAGACAGGATGAGGATTAGAACATGGAACAGTTTAGTAAAACATCATATGTATATTTCAAAGAAAGCTAAAAAGTGGTTCTATAGACATCACTATGAAAGTAGACATCCGAGAGTAAGTTCAGAAGTACACATCCCGTTAGGGGAGGCTACATTAATAGTAAGAACATATTGGGGTCTGCACCCAGGAGAGAAAGAATGGCAATTGGGTCATGGGGTCTCCATAGAATGGAGGCAGAAGAGGTATAGTACACAAATAGACCCTGATCTGGCAGACCATCTAATCCATCTGTATTATTTTGACTGTTTTTCAGAATCTGCCATAAGGAAAGCCATATTAGGAGAAATAGTTAGTCCTAGGTGCGAATATCAAGCAGGACATAACAAGGTAGGATCTCTGCAATATTTGGCATTGAAAGCATTAGTAGTCCCAAACAAGGCAAGGCCACCCTTGCCTAGTGTTAGGAAATTAGTAGAGGATAGATGGAACAAGCCCCGGAAGACCAGGGGCCACCGAGGGAGCCACACAATGAATGGGTGCTAGAACTATTAGAGGAGCTCAAGCAGGAAGCTGTTAGGCATTTCCCTCGGCAGTGGCTACATGGCCTAGGACAACTTATATATAGTACCTATGGGGATACTTGGGAAGGAGTTGAAGCTATAATAAGAACTTTGCAACAACTGCTGTTTGTCCATTTCAGAATTGGGTGCCGACATAGCAGAATAGGCATTTCGAAGAAGAAGAGTAAGGATGGAGCCAGTAGATCCTAAACTAGAGCCCTGGAACCATCCGGGAAGCCAGCCTAAAACTGCTTGTAACAAGTGCTATTGTAAAAAGTGTTGCTATCATTGCCAGCTGTGCTTTTTAAACAAAGGCTTAGGCATCTCCTATGGCAGGAAGAAGCGGAGACCCCGACGAGGACCTTCTCAGAGCAGTAAAGATCATCAAAATCCTATACCAAAGCAGTAAGTAGTGGTAATTAATAATGTAATGTTGTCCTTAGAAATAGCTGCAATAGTAGGACTGGTAGTAGCATTAATCGCAGCAATAGTTGTATGGACTATAGTATTTATAGAATATAGGAAGATTAGGGAGCAAAGGAAAATAGACTGGTTAATCCAAAGAATAAGTGAAAGAGCAGAAGACAGTGGCAATGAGAGTGATGGAGACACAGACGAGTTGGCTGAGCTTGTGGAGATGGGGCCTCATGATCTTTGGAATGTTAATGATTTGTAGTGCTAGAGAAAACTTGTGGGTCACAGTATACTATGGAGTACCTGTGTGGAAAGATGCAGAAACCACCTTATTTTGCGCATCAGATGATAAAGCATATGAGACAGAAGCGCATAATGTCTGGGCCACACATGCCTGTGTACCCACAGACCCCAACCCACAAGAAGTAAACCTAAAAAATGTGACAGAAGATTTTAACATGTGGAAAAATAATATGGTAGAGCAGATGCATGAAGATATAATCAGTCTATGGGATCAAAGCCTAAAGCCATGTGTAAAATTAACCCCTCTCTGTGTCACGTTAAACTGTAGCAATGCCAACACCAATAGCACCAATAGCACTAGCGCCCCTAGCATGGGCCCTGGAGAAATAAAAAACTGTTCTTTTAATGTTACCACAGAAGTAAGAGATAAAGAAAAGAAAGTCTATGCACTGTTTTATAAACTTGATGTAGTACAAATTAATGAAAGTGACAGTAATAGTACAAAGGATAGTACTCAGTATAGACTAATAAATTGTAATACCTCAGCCATCACACAGGCTTGTCCAAAGGTATCCTTTGAGCCAATTCCTATACATTATTGTGCCCCAGCTGGTTTTGCGATTCTAAAGTGTGAGGATCCGAGATTCAATGGAACAGGACCATGCAATAATGTTAGCTCAGTACAATGTACACATGGAATTATGCCAGTAGCATCAACTCAACTGCTGTTGAATGGCAGTCTAGCAGAAAAAGAGGTGATGATTAGATCTGAAAATATTACAAACAATGCCAAAAACATAATAGTACAGTTTAATGAATCGGTACCAATTACTTGTATCAGACCCAACAACAATACGAGAAAAGGTATACCTATTGGACCAGGACAAGTCTTCTATACAAGTGACATAATAGGGGATATAAGACAAGCATATTGTAGTATCAACAAAACAAAATGGGATGCCTCTTTACAAAAGGTAGCTGAACAATTAAGAAAACACTTCCCTAATAAAACAATAAATTTTACCAAACCCTCAGGAGGGGATCTAGAAATTACAACACATAGTTTTAATTGTGGAGGAGAATTTTTCTATTGTAATACAACAAGCCTGTTTAATAGCACATGGAAGAATGGCGCCACCATACAGGAGAATAGCACGGAGACAAATGGAATTATGACTCTCCCATGCAGAATAAAACAAATTGTAGACATGTGGCAGGAAGTAGGACAAGCAATGTATGCCCCTCCCATTGCAGGAGTAATATATTGTACATCAAACATTACAGGAATAATATTGACAAGAGATGGTGGGAGCAGTAACACCAATAGTGAGATCTTTAGGCCTGGAGGAGGAGATATGAGGGACAATTGGAGAAGTGAATTATATAAGTATAAAGTAGTAAAAATTGAACCACTAGGAGTAGCACCCTCCAGGGCAAAGAGAAGAGTGGTGGAGAGAGAAAAAAGAGCAGTGGGAATAGGAGCTGTTTTCCTTGGGTTCTTGGGAGCTGCAGGAAGCACTATGGGCGCGGCGTCAATAACGCTGACGGTACAGGCCAGACAGTTATTATCTGGCATAGTGCAACAGCAAAGCAATTTGCTGAAGGCTATAGAGGCTCAACAGCATCTGTTGAAACTCACAGTCTGGGGCATTAAACAGCTCCAGGCAAGAGTCCTGGCTCTGGAGAGATACCTACAAGATCAACAGCTCCTGGGAATTTGGGGTTGCTCTGGAAAACTCATCTGCACCACTACTGTGCCCTGGAACTCTAGTTGGAGTAATAAGACTTACGAGGAGATTTGGAACAACATGACCTGGTTGCAATGGGATAGAGAAATTGACAATTACACAAATATAATATACAATCTACTTGAAGAATCGCAGAACCAGCAGGAAAAGAATGAACAAGACTTACTGGCATTAGATAAATGGGCAAGTTTGTGGAATTGGTTTAGCATAACAAACTGGCTGTGGTATATAAGAATATTCATAATGATAGTAGGAGGCTTGATAGGATTAAGAATAGTTATGGCTATAATTTCTGTAGTGAATAGAGTTAGGCAGGGATACTCACCTTTGTCATTTCAGATCCCTACCCCAAACCCAGAGGGTCTCGACAGGCACGGAAGAATCGAAGAAGGAGGTGGAGAGCAAGACAGAACCAGATCGATTCGATTAGTGAGCGGATTCTTGGGACTTGCCTGGGACGACCTACGGAGCCTGTGCCTCTTCAGCTACCACCGATTGAGAGATTGCATCTTGATTGTAGCGAGGACTGTGGAACTTCTGGGACACAGCAGTCTCAAGGGACTGAGACTGGGGTGGGAGGGCCTCAAATATTTGGGGAACCTTCTACTGTATTGGGGTCGGGAATTGAAAAATAGTGCTATTAGTTTACTAAATTCCACAGCAATAGCAGTAGCTGAGTGGACAGATAGGGTTATAGAAATAGGACAAAGAGCTTGCAGAGCTATTCTCAACATACCTAGAAGAATCAGACAGGGCTTCGAAAGAGCTTTACTATAAAATGGGGAACAAGTGGTCAAAAAGTACCATAGTGGGATGGCCTGCTATTAGGGAGAGAATAAGAAGAACTCCTCCAGCAGCAGAAAGAGTAGGGGCAACAAGACAAACTCCCCCAGCAGCAGAAGGAGTAGGAGCAGTGTCTCGAGATTTAACTACACATGGAGCAGTCACAATTGGTAATACAGCAGCCTATAATCCTGATAGCGCCTGGGTAGAAGCGCAAGAAGAGGAGGAGGAAGTAGGCTTCCCAGTCAAGCCACAGGTACCTGTAAGACCAATGACCTTCAAGGGAGCTTTTGATCTCAGCCACTTTTTAAAAGAAAAGGGGGGACTGGATGGGTTAATTTACTCCCAGAAAAGACAAGACATCCTTGATCTGTGGGTCTACAAC
>A2.CD.97.97CDKFE4_AF286240_K.CD.97.EQTB11C_AJ249235
CCAGCCAAAATTACCCTATAGTGCAGAATGCACAAGGGCAAATGGTACACCAGGCCCTATCACCTAGGACTTTAAATGCATGGGTCAAAGTAGTAGAAGAAAAGGCTTTCAGCCCAGAAGTAATACCCATGTTTTCAGCATTATCAGAAGGAGCCACCCCACAAGATTTAAATACTATGCTAAACACGGTGGGGGGACATCAAGCAGCTATGCAAATATTAAAAGATACCATCAATGAGGAAGCTGCAGAATGGGACAGGCTACATCCAGTACATGCAGGGCCTATTCCACCAGGCCAGATGAGAGAACCAAGGGGAAGTGACATAGCAGGAACTACTAGTACCCTTCAGGAACAAATAGGATGGATGACTAGCAACCCACCTATCCCAGTGGGAGAAATCTATAAAAGATGGATAATCCTGGGATTAAATAAGATAGTAAGAATGTATAGCCCTGTCAGTATTTTGGACATAAGACAAGGGCCAAAAGAACCCTTTAGAGACTATGTAGATAGGTTCTTTAAAACTCTCAGAGCTGAGCAAGCTACACAAGAGGTAAAAAACTGGATGACAGACACCTTGCTGGTCCAAAATGCGAACCCAGATTGTAAATCAATCCTGAAAGCATTAGGACCAGGGGCTACATTAGAAGAAATGATGACAGCATGTCAGGGAGTGGGGGGACCCGGCCATAAAGCAAGGGTTTTGGCTGAAGCAATGAGCCAATTACAAAATGCAACTCCAAACATAATGATGCAGAAAGGCAATTTTAGGGGTCAAAAAAGAATCAAATGTTTCAACTGTGGCAAGGAAGGACACCTAGCCAGAAATTGCAGGGCCCCTAGGAAAAAGGGCTGCTGGAAATGTGGGAAGGAAGGACATCAGATGAAAGACTGCACTGAGAGACAGGCTAATTTTTTAGGGAAAATTTGGCCTCCCAACAGAGGGAGGCCAGGAAATTTTCCCCAGAGCAGACCAGAGCCAACAGCCCCACCAGCAGAGGACTTTGGAATGGGGGAAGAGACAAAAAACAGGGAACCGCATACTCCTGCAATTTCCCTCAAATCACTCTTTGGCAGCGACCTCTTGTCACAGTAAAAATAGAAGGACAGCTAAGAGAAGCTCTATTAGATACAGGAGCAGATGATACAGTGTTAGAAGACATAAATTTGCCAGGAAAATGGAAACCAAAAATGATAGGGGGAATTGGAGGTTTTATCAAAGTAAGACAATATGATCAGATAGCTATAGAAATTTGTGGAAAAAGGGCCATAGGTACAGTATTAGTAGGACCTACACCTGTCAACATAATTGGAAGAAATATGTTGGTTCAGCTTGGTTGTACTTTAAATTTTCCAATAAGTCCTATTGAAACTGTACCAGTAAAATTAAAGCCAGGAATGGATGGCCCAAAGGTTAAACAATGGCCATTGACAGAAGAAAAAATAAAAGCATTAACAGAAATTTGTGGAGAAATGGAAAAGGAAGGAAAAATTTCAAAAATTGGGCCTGAAAACCCATACAACACTCCAGTGTTTGCTATAAAGAAAAAAGACAGCACTAAATGGAGAAAATTAGTAGATTTCAGAGAACTCAATAAGAGAACTCAAGACTTTTGGGAAGTTCAGTTAGGAATACCACATCCAGCAGGATTAAAAAAGAAAAAATCAGTAACAGTACTAGATGTGGGGGACGCATATTTTTCCGTTCCCTTAGATGAAGACTTCAGAAAGTATACTGCATTCACCATACCTAGTATAAACAATGAGTCACCAGGAATTAGGTATCAGTACAATGTACTTCCACAGGGATGGAAAGGATCACCATCAATATTCCAGAGTAGCATGACAAAAATTTTAGAGCCCTTTAGATCAAAATATCCAGAGATGGTTATATACCAGTACATGGATGACTTGTATGTAGGATCTGATTTGGAAATAGGTCAGCATAGAGCAAAAATAGAGGAATTAAGGGCTCATTTATTAAGATGGGGATTTACTACACCAGACAAAAAACATCAGAAAGAGCCCCCATTTCTTTGGATGGGATATGAGCTTCATCCTGACAAATGGACAGTCCAGCCTATAAAGCTGCCAGAAAAAGACAGCTGGACTGTCAATGATATACAGAAATTAGTAGGAAAGTTAAATTGGGCAAGTCAGATTTATGCAGGGATTAAAGTAAAGCAACTGTGTAGACTCCTTAGAGGAACCAAAGCACTAACAGACATAGTAACACTGACTAAAGAAGCAGAATTAGAATTGGAAGAGAACAGGGAGATTCTAAAAAACCCTGTACATGGGGTATACTATGACCCATCAAAAGACTTAATAGCAGAAATACAGAAACAAGGGCAAGATCAATGGACATATCAAATTTATCAAGAGCCATTTAAAAATCTAAAAACAGGGAAATATGCAAAAAAGAAATCCACACACACTAATGATGTAAAACAATTAACAGAAGCAGTACAAAAAATAGCCATAGAAAGCATAGTAATATGGGGAAAGACTCCTAAATTTAGATTACCCATACAAAAAGAAACATGGGAGACATGGTGGACGGAGTATTGGCAGGCTACCTGGATTCCTGAGTGGGAGTTTGTCAATACCCCTCCTCTAGTAAAACTATGGTACCAATTAGAAACAGAACCCCTAGCAGGAGCAGAAACTTTCTATGTAGATGGGGCAGCTAATAGAGAGACTAAACTAGGAAAGGCAGGGTATGTCACTGACAGAGGAAGACAAAAAATTGTCTCCCTGACGGAAACAACAAATCAAAAGACTGAATTACATGCAATCTATTTGGCTTTACAGGATTCAGGATTAGAAGTGAACATAGTGACAGATTCACAGTATGCATTAGGAATCATTCAGGCACAACCAGATAGGAGTGAATCAGAGTTAGTCAATCAAATAATAGAAAAGTTAATAGAAAAGGAAAGGGTCTACCTGGCATGGGTACCAGCACACAAAGGGATTGGAGGAAATGAACAGGTAGATAAATTAGTCAGTTCTGGAATCAGGAAAGTGCTATTTTTAGATGGGATAGATAAGGCTCAAGAAGAACATGAAAGATATCACAGTAATTGGAGAGCAATGGCTCAGGACTTTAATCTGCCACCTATAGTAGCAAAAGAAATAGTAGCTAGCTGTGATAAGTGTCAGCTAAAAGGGGAAGCCATACATGGACAAGTAGACTGTAGTCCAGGGATATGGCAGTTAGATTGTACACATTTAGAAGGAAAAATTATCCTAGTAGCAGTTCATGTAGCCAGTGGCTACATAGAAGCAGAAGTTATTCCAGCAGAGACAGGACAGGAAACAGCATACTTTATATTAAAATTAGCAGGAAGATGGCCAGTAAAAGTGATACATACAGACAATGGGCCCAATTTCACTAGTGCAACAGTCAAGGCAGCCTGTTGGTGGGCAGGTGTCCAACAAGAATTTGGGATTCCCTACAATCCCCAAAGTCAAGGAGTAGTAGAATCTATGAATAAAGAATTAAAGAGAATCATAGGGCAGATAAGAGATCAAGCTGAACACCTTAAGACAGCAGTACAAATGGCAGTATTCATTCACAATTTTAAAAGAAAAGGGGGGATTGGGGGATACAGTGCAGGGGAAAGAATAATAGACATAATAGCAACAGATATACAAACTAAAGAATTACAAAAACAAATTATAAAAATTCAAAATTTTCGGGTTTATTACAGGGACAGCAGGGATCCAATTTGGAAAGGACCAGCAAAACTCCTCTGGAAAGGTGAAGGGGCAGTAGTAATACAAGACAACAGTGATATCAAGGTAGTACCAAGAAGAAAAGCAAAGATCATCAGGGATTATGGAAAACAGATGGCAGGTGATGATTGTGTGGCATGTAGACAGGATGAGGATTAGAACATGGAACAGTTTAGTAAAACATCATATATATGTTTCAAGGAAAGCTAAAGATTGGTCCTATAGACATCACTATGAAAGCAGACATCCAAAAGTAAGTTCAGAAGTACACATCCCGCTAGGGGAGGCTAGATTAGTAGTAAGAACATATTGGGGTCTGCAACCAGGAGAACAAGCCTGGCACTTGGGGCATGGGGTCTCCATAGAATGGAGGCAGAAAAGGTATAGTACACAAATAGACCCTGATCTGGCAGATCATCTAATCCATCTGTATTATTTTGACTGTTTTTCAGAATCTGCCATAAGGAAAGCCATATTAGGAGAAATAGTTAGCCCTAGGTGTGAATATCAAGCAGGACATAACAAGGTAGGATCGCTGCAGTACTTGGCATTGAAAGCATTAGTAGCTCCAACAAGGGCAAAGCCACCTTTACCTAGTGTTAAGAAATTAGTAGAGGATAGATGGAACAAGCCCCAGAAGACCAGGGGCCACAGAGGGAGCCATACAATGAATGGGTGTTAGAACTGTTAGAAGAGCTCAAGCAGGAGGCTGTTAGACATTTCCCTGGGCAGTGGCTACACGGCCTAGGACAACATATCTATAATACCTATGGGGATACTTGGGAAGGAGTTGAAGCTATAACAAGAACTCTGCAACAACTACTGTTTGTCCATTTCAGAATGGGGTGCCATCATAGCAGGATAGGTGTTACGCGACAGAGGAGAGCAAGGAATGGATCCAGTAGACCCTAAATTAGAGCCCTGGAACCATCCGGGAAGTCAGCCTAAAACTGCTTGTACCAAGTGTTATTGTAAAAAGTGTTGCTATCATTGCCCAGTGTGCTTTCTAAACAAGGGCTTAGGCATCTCCTATGGCAGGAAGAAGCGGAGACACCGACGAGGACCTGCTCAAAGCAGTAAGAATCATCAAAATCCTGTACCAAAGCAGTAAGTAGTAGTAATTAATAGATGTAATGATACCTTTAGCAATTTTGTCAATAGTAGGGCTGATAGTAGCATTAATCTTAGCAATAGTTATATGGACTATAGTATTTATAGAATATAGGAAAATTCAGAAGGAAAGGAAAATAGACAGGCTAATCAAGAGAATAAGTGAAAGAGCAGAAGACAGTGGCAATGAGAGTGATGGGGATACAGAGGAATTGTCCACCCTTATGGGGGTGGGAATCTTGCTTTTT
>B.US.98.98USHVTN1925c1_AY560107_C.ZA.00.1184MB_AY838566
TGGTAACTAGAGATCCCTCAGACCCTTTTAGTCAGTGTGGAAAATCTCTAGCAGTGGCGCCCGAACAGGGACCTGAAAGCGAAAGAGAAACCAGAGGAGCTCTCTCGACGCAGGACTCGGCTTGCTGAAGCGCGCACAGCAAGAGGCGAGGGGCGGCGAACGGTGAGTACGCCAAAATTTTTGACTAGCGGAGGCTAGAAGGAGAGAGATGGGTGCGAGAGCGTCAGTATTAAGCGGGGGAAAATTAGATAGATGGGAAAAAATTCGGTTAAGGCCAGGGGGAAAGAAAAAATATAAACTAAAACATATAGTATGGGCAAGCAGGGAGCTAGAACGATTCGCAGTCAATCCTGGCCTGTTAGAGACATCAGAAGGCTGTAGACAGATACTGGGACAGCTACAACCGTCCCTTCAGACAGGATCAGAAGAACTTAAATCATTATACAATACAATAGCAGTCCTCTATTGTGTGCATCAAAACATAGATGTAAAAGACACCAAGGAAGCTTTAGATATGATAGAGGAAGAGCAAAACAAAAGTAAGAAAAAGGCACAACAAGCAGCAGCAGCAGCTGACACAGGAAACAGCGGAAATGTCAGCCAAAATTACCCTATAGTACAGAACCTTCAAGGGCAAATGGTACATCAGCCCATATCACCTAGAACTTTAAATGCATGGGTAAAAGTAGTAAAAGAGAAGGCTTTTAGCCCAGAGGTAATACCTATGTTTGCAGCATTATCAGAAGGAGCCACCCCACAAGATTTAAACACCATGCTAAACACAGTGGGGGGACATCAAGCAGCCATGCAAATGTTAAAAGAGACCATCAATGAGGAGGCTGCAGAATGGGATAGATTGCATCCAGTGCATGCAGGGCCTATTGCACCAGGCCAGATGAGAGAACCAAGGGGAAGTGACATAGCAGGAACTACTAGTACCCTTCAGGAACAAATAGCATGGATGACAAATAATCCAGCTATCCCAGTAGGAGAAATCTATAAGAAATGGATAATCATGGGATTAAATAAAATAGTAAGAATGTATAGCCCCACCAGCATTCTGGACATAAGACAAGGACCAAAGGAACCCTTTAGAGACTATGTAGACCGGTTCTATAAGACTCTAAGAGCCGAGCAAGCTTCACAGGAAGTAAAAAATTGGATGACAGAAACCTTGTTGGTCCAAAATGCGAACCCAGATTGTAAGACTATCTTAAAGGCATTAGGGCCAGGAGCTACACTAGAAGAAATGATGACAGCATGTCAGGGAGTGGGAGGACCTGGCCATAAAGCAAGAGTCTTGGCTGAAGCAATGAGCCAAGTAACAAATTCAGCTACAGTAATGATGCAGAGAGGCAATCCCAGGAACCAAAGAAAAACTATTAAGTGTTTCAATTGTGGCAAAGAAGGGCACTTAGCCAGAAACTGCAGGGCTCCTAGAAAAAGGGGCTGTTGGAAATGTGGAAAGGAAGGACACCAAATGAAAGATTGTACTGAGAGACAGGCTAATTTTTTAGGGAAAATCTGGCCTTCCCACAAGGGGAGGCCAGGGAATTTTCTTCAGAGCAGGCCAGAGCCATCAGCCCCACCAGAGGAGAGCTTCAGGTTTGGGGAAGAGACAACAGCTCCCCCTCAGAAGCAAGAGCCGAGAGACAAGGAACTGTATCCTGTAACTTCCCTCAGATCACTCTTTGGCAACGACCCCTCGTCACAATAAAGATAGGGGGACAACTAAAGGAAGCTCTATTAGATACAGGAGCGGATGATACAGTATTAGAAGAAATGAATTTGCCAGGAAGATGGAAACCAAAAATGATAGGGGGAATTGGAGGTTTTATCAAAGTAAGACAGTATGATCAGATACCCATAGAAATCTGTGGACATAAAGCTATAGGTACAGTATTAGTAGGACCTACACCTGTCAACATAATTGGAAGAAATCTGTTGACTCAGATTGGTTGTACTTTAAATTTTCCCATTAGTCCTATTGAAACTGTACCAGTAAAATTAAAGCCAGGAATGGATGGCCCAAAAGTTAAACAATGGCCATTGACAGAAGAAAAAATAAAAGCATTAGTAGAAATTTGTACAGAAATGGAAAAGGAAGGGAAAATTTCAAAAATTGGGCCTGAAAATCCATACAATACTCCAGTATTTGCTATAAAGAAAAAGGACAGTACTAAATGGAGAAAATTAGTAGATTTCAGAGAACTTAATAAGAGAACTCAAGACTTCTGGGAAGTTCAATTAGGAATACCACATCCTGCAGGGTTAAAAAAGAAGAAATCAGTAACAGTACTGGATGTGGGTGATGCATATTTTTCAGTTCCCTTAGATGAGGACTTCAGAAAGTATACTGCATTTACCATACCTAGTATAAACAATGAGACACCAGGGATTAGATATCAGTATAATGTGCTCCCACAGGGATGGAAAGGATCACCAGCGATATTCCAATGTAGCATGACAAAAATCTTAGAGCCTTTTAGAAAACAAAATCCAGACATAGTCATCTATCAATACATGGATGATTTGTATGTAGGATCTGACTTAGAAATAGAGCAGCATAGAACAAAAATAGAGGAACTGAGACAACATTTGTTGGGATGGGGGTTTACAACACCAGACAAAAAACATCAGAAAGAACCTCCATTCCTTTGGATGGGTTATGAACTCCATCCTGATAAATGGACAGTACAGCCTATAGTGCTGCCAGAAAAAGACAGTTGGACTGTCAATGACATACAGAAGTTAGTGGGAAAATTAAATTGGGCAAGTCAGATTTACCCAGGGATTAAAGTAAAGCAATTATGCAAACTCCTTAGGGGAACCAAAGCATTAACAGAAGTAATACCACTAACAAAAGAAGCAGAGCTAGAGCTGGCAGAAAACAGGGAGATTCTAAAAGAGCCAGTACATGTAGTGTATTATGACCCATCAAAAGACTTAATAGCAGAAGTACAGAAGCAGGGGGAGGGCCAATGGACATATCAAATTTATCAAGAGCCATTTAAAAATCTGAAAACAGGAAAATATGCAAGAATGAGGGGTGCCCACACTAATGATGTAAAACAATTAACAGAGGCAGTGCAAAAAATAGCCACAGAAAGCATAGTGATATGGGGGAAGGCTCCTAAGTTTAGACTACCCATACAAAGAGAAACATGGGACACATGGTGGACAGAATATTGGCAAGCCACCTGGATTCCTGAGTGGGAATTTGTCAATACCCCTCCCCTAGTGAAATTATGGTACCAGTTAGAGAAAGAACCCATAGAAGGAGCAGAAACTTTCTATGTAGATGGGGCAGCTAACAGGGAGACTAAAGTAGGAAAAGCAGGATATGTTACTAACAGAGGAAGACAAAAGGTTGTCTCCCTAAATGACACAACAAATCAGAAGACTGAGTTACAAGCAATTCATCTAGCTTTGCAGGATTCAGGATTAGAAGTAAACATAGTAACAGACTCACAATATGCATTAGGAATCATTCAAGCACAACCAGATAAAAGTGAATCAGAATTAGTCAGTCAAATAATAGAACAGTTAATAAAAAAGGAAAAGGTCTACCTGGCATGGGTACCAGCACACAAAGGGATAGGAGGAAATGAACAAGTAGATAAACTAGTCAGTGCTGGAATCAGGAAAGTACTATTTTTAGATGGGATAGATAAAGCCCAAGAAGACCATGAGAAATATCACAGTAATTGGAGAGCAATGGCTAGTGATTTTAACCTGCCACCAGTAGTAGCAAAAGAAATAGTAGCCAGCTGTGATAAATGTCAGCTAAAAGGAGAAGCCATGCATGGACAAGTAGACTGCAGTCCAGGAATATGGCAGCTAGATTGTACACATTTAGAAGGAAAAGTTATCCTGGTAGCAGTCCATGTAGCCAGTGGATATATAGAAGCAGAAGTTATTCCAGCAGAAACAGGACAGGAAACAGCATACTTTATCTTAAAATTAGCAGGAAGATGGCCAGTAAACACAATACATACAGACAATGGCAGCAATTTCACCAGTACTACAGTTAAGGCCGCCTGTTGGTGGGCGGGGGTCAAGCAAGAATTTGGCATTCCCTACAATCCCCAAAGTCAAGGAGTAGTAGAATCTATGAATAAAGAATTAAAGAAAATTATAGGACAAGTGAGAGATCAGGCTGAGCATCTTAAGACAGCAGTACAAATGGCAGTATACATCCACAATTTTAAGAAAAAAGGGGGGATTGGGGGGTACAGTGCAGGGGAAAGAATAGTAGACATAATAGCAACAGACATACAAACTAAAGAACTACAAAAACAAATTACAAAACTTCAAAATTTTCGGGTTTATTACAGGGACAGCAGAGATCCACTTTGGAAAGGACCAGCAAAGCTTCTCTGGAAAGGTGAAGGGGCAGTAGTAATACAAGATAACAGTGACATAAAAGTAGTGCCAAGAAGAAAAGCAAAGATCATTAGGGATTATGGAAAACAGATGGCAGGTGATGATTGTGTGGCAAGTAGACAGGATGAGGATTAAAACATGGAAAAGTCTAGTAAAACACCATAAGTATATTTCAAAGAAAACTAAGGGATGGATTTATAAACATCACTATGAAAACCCTCATCCAAGAATAAGTTCAGAAATACACATTCCACTAGGGGATGCTAGATTGGTCATAACAACATACTGGGGTCTGCATACAGGAGAAAGAGACTGGCATTTGGGTCAGGGAGTCTCCATAGAATGGAGGAAAGAGAGATATAGCACACAAGTAGACCCTGGCCTAGCAGACCAACTAATTCACTTGTATTACTTTGATTGTTTTTCAGAATCTGCTATAAGAAATGCCATATTAGGACATATAGTTAGTCCTAGTTGTGAATATCAAGCAGGACATAAAAAGGTAGGATCTCTACAGTACTTGGCACTAGCAGCATTAATAACACCAAGAAAGATAAAGCCACCTCTGCCTAGTATTACGAAGCTGACAGAGGATAGATGGAACAAGCCCCAGAAGACCAAGGGCCACAGAGGGAGCCAAACAATGAATGGACACTAGAACTTTTAGAGGAGCTTAAGAATGAAGCTGTTCAACACTTTCCTAGGATGTGGCTCCATGGCTTAGGGCAACATATCTATGAAACTTATGGGGATACTTGGGCAGGAGTAGAAGCCATAATAAGAATTCTGCAACAACTGCTGTTTATTCATTTCAGAATTGGGTGTCGACATAGCAGAATAGGCATTATTCGATATCCACAGAGAAGAGGAAGAAATGGAGCCAGTAGACCCTAGTCTAGAGCCCTGGAAGCATCCAGGAAGCCAACCTAGGACTGCTTGTACCAAATGTTATTGTAAAAAGTGTTGCTTTCATTGCCAAGTGTGTTTCATAACAAAAGGCTTAGGCATCTCCTATGGCAGGAAGAAGCGGAGACAGCGACGAAGAGCTCCTCAAGACAGTCAGGCTCATCAAGCTTCTCTACCAGAGCAGTAAGTAGTATATGTAATGCAAGCTTTACAAATAACAGCAATAGTAGCATTAGTAGTAGTAGCAATAATAGCAATAGTTGTATGGTCCATAGTACTCATAGAATATAGGAAAATACTAAGACAAAGGAAAATAGATAGGTTAATTGATAGAATAAGAGAAAGAGCAGAAGACAGTGGCAATGACAGTGAAGGGGATCAGGAAGAATTATCAGCACTTGTGGAAATGGGGCATGATGCTCCTTGGGATGTTGATGATCTGTAGTGCTACAGGACCCTTGTGGGTCACAGTCTATTATGGGGTACCTGTGTGGAAAGATGCAACCACCACTTTATTTTGTGCATCAGATGCTAAAGCATATGATACAGAGGTACATAATGTTTGGGCCACACATGCCTGTGTACCCACAGACCCCAACCCACAAGAAGTAGCATTGGAAAATGTGACAGAAAATTTTAATATGTGGAAAAATAACATGGTAGAACAGATGCATGAGGATATAATCAGTTTATGGGATCAAAGCCTAAAGCCCTGTGTAAAATTAACCCCACTCTGTGTTACTTTACATTGCAATAATACTGATAAGAATGTCACTAGTATCACTGGGGGTAACGAAACAAAATTAGAAATGAAAGAAGAAATAAAAAACTGCTCTTTCAATATCACCACAAACATAAGAGATAAGGTGCAGAAAGAATATGCGCTTTTTTATAAGTCTGATGTAGTACAAATAGGAAATAATACAAATAGTACCAGTTATAGGTTGATAAGTTGTAACACCTCAGTCATTACACAAGCCTGTCCAAAGGTATCCTTTGAGCCAATTCCCATACATTATTGTGCCCCGGCTGGTTTTGCGATTGTAAAGTGTAGGGATAAAAAATTTAATGGAACAGGACCATGTACAAATGTCAGCACAGTACAATGTACACATGGAATTAGGCCAGTAGTATCAACTCAATTGCTGTTAAATGGCAGCCTAGCAGAAGAAGAGGTAATAATTAGATCTGCAAATCTCACGGACAATACTAAAACCATAATAGTACAGCTGAACAAATCTGTAGTAATTAATTGTACAAGACCTAACAATAATACAAGAAGAGGTATACATATGGGACCAGGGAAATTTTATGCAACAGGAGACATAATAGGAGATATAAGGCAAGCACATTGTAACCTTAGTGAAGCAGATTGGAATGACACTTTAAAACAGATAGCTGTAAAATTAAGAGAAAAATTTATTAATAAGACAATAATCTTTAATCAATCCTCAGGAGGGGACCCAGAAATTGTAATGCATAGTTTTAATTGTGGAGGGGAATTTTTCTACTGTAATACAGCAAAACTGTTTAATAGCATTTGGAATAATAGCAGTTGGAGTGGTACTGAAAGGTCAAGTAACGAGACAAGGAACATCATACTCCCATGTAAAATAAGACAAATTGTAAACCTGTGGCAGGAAGTAGGAAAAGCAATGTATGCCCCTCCCATCAGAGGACAAATTAGATGTTCATCAAATATTACAGGGATACTATTAACAAGAGATGGTGGTAATAACACAGAAGGGAACGAGACCTTCAGACCTGGAGGAGGAGATATGAGGGACAATTGGAGAAGTGAATTATATAAATATAAAGTAGTAAAAATTGAACCATTAGGAGTAGCACCCACCAAGGCAAAGAGAAGAGTGGTGCAGAGAGAAAAAAGAGCAGTGGGATTAGGAGCTTTGTTCCTTGGGTTCTTGGGAGCAGCAGGAAGCACTATGGGCGCAGCGTCAGTAACGCTGACGGTACAGGCCAGACAATTATTGTCTGGTATAGTGCAGCAGCAAAACAATTTGCTGAGGGCTATTGAGGCGCAACAGCACCTGTTGCAACTCACAGTCTGGGGCATCAAACAGCTCCAGGCAAGGGTCCTGGCTCTGGAAAGATACCTAAGGGATCAACAACTCCTGGGGATTTGGGGTTGCTCTGGAAAACTCATCTGCACCACTGCTGTGCCTTGGAATGCTAGTTGGAGTAATAAATCTCAGGACCAGATTTGGAATAACATGACCTGGATGGAATGGGAAAGAGAGATTGAGAATTACACAGACTTAATATACACTTTACTTGAACAATCGCAAAACCAACAAGAAAAGAATGAACAAGAATTATTGGAATTAGATAAATGGGCAAGTTTATGGAGTTGGTTTGACATAACAAACTGGCTGTGGTATATAAAAATATTCATAATGATAGTAGGAGGCTTGATAGGTTTAAGAATAATTTTTGCTGTACTTTCTATAGTAAATAGAGTTAGGCAGGGGTACTCACCTTTGTCGTTTCAGACCCTTACCCCGAACCCAGGGGGACCCGACAGGCCCGAAGGAATCGAAGAAGGAGGTGGAGAGAGAGACAGAGACACATCAACAAACTTAGCGGATGGATTCTTAGCGATTATCTGGGTCGATCTGCGGAGCCTGTGCCTCTTCAGCTACCACCGCTTGAGAGACTTACTCTTGATTGTAGCGAGGATTGTGGAACTTCTGGGACGCAGGGGGTGGGAAGTCCTCAAATATTGGTGGAATCTCCTGCAGTATTGGAGCCAGGAACTAAAGAATAGTGCTGTTAGCTTGCTCAATACCACAGCTATAGCAGTAGCTGAGGGGACAGATAGGATTATAGAAGCTGTACAAAGAGTTTTTAGAGCTTTTCTCCACATACCTAGACGAATAAGACAGGGCTTTGAAAGGGCTTTGCTATAAGATGGGTGGCAAGTGGTCAAAACGTAGTGTGCCTGGATGGTCTCAGATAAGGGAAAGAATGAGACAAACTGCGCCAGCAGCAAGAAGGGGAAGAGCAACTGAGCCAGCAGCAGATGGGGTGGGAGCAGCATCTCGAGACTTGGAAAAACATGGAGCAATTACAAGTAGCAATACAGCAGCTACCAATGCTGATTGTGCCTGGTTAGAAGCACAGGAGGAGGAGGAGGTGGGTTTTCCAGTTAAACCTCAGGTACCTTTAAGACCAATGACTTACAAAGGAGCGTTAGATCTCAGCCACTTTTTAAGAGAAAAGGGGGGACTGGAAGGGTTAACTTACTCCCAACAAAGACAAGATATTCTTGATCTGTGGGTCTACCACACACAAGGCTACTTCCCTGATTGGCAGAATTACACACCAGGGCCAGGGGTCAGATACCCACTGACCTTTGGATGGTGCTTCAAGCTAGTACCAGTGGATCCAGAGAAGGTAGAAGAGGCCAATGCAGGAGAGAACAACTGCTTGCTACACCCTATGCACCAGCATGGGATGGATGACCCAGAGGGAGAAGTGTTAGAGTGGAAGTTTGACAGCCGCCTGGCATTTCATCACATGGCCCGAGAGCTGCACCCGGAGTTCTACAAAGACTGCTGACAGCGAGCTTGAGGACTGCTGACATCGAGCTTTCTACAAGGGACTTTCCGCTGGGGACTTTCC
>B.UY.01.01UYTRA1179_AY781127_D.ZA.86.R482_AY773341
GCGAGAGCGTCAATATTAAGCGGGGGACAATTAGATAGATGGGAAAAAATTCGGTTAAGGCCAGGAGGAAAGAAAAAATATAGGTTAAAACATATAGTATGGGCAAGCAGGGAGCTAGAACGATTCGCAGTTAATCCTGGCCTTTTAGAAACATCAGAAGGATGTAGACAAATACTGCAACAGCTACAACCAGCCCTTCAGACAGGATCAGAAGAACTTAAATCATTATTTAATACAGTAGCAACCCTCTATTGTGTGCATCAAAGGATAAATGTAAAAGACACCAAGGAAGCTTTAGAAAAAATAGAGGAGGAACAAAACAAAAGTAAGAAAAAGGTACAGCAAGCAGCAGATGACACAGGAAACAGCAGCCAGGTCAGCCAAAATTACCCTATAGTGCGGAATCTTCAGGGGCAAATGGTACATCAGGCCATATCACCTAGAACTTTAAATGCATGGGTAAAAGTAGTAGAAGAAAAGGCTTTCAGTCCAGAAGTAATACCCATGTTTTCAGCATTATCAGAAGGAGCCACCCCACAAGATTTAAATACCATGCTAAACACAGTGGGGGGACATCAAGCAGCTATGCAGATGTTAAAAGAGACCATCAATGAGGAAGCTGCAGAATGGGATAGATTGCATCCAGTACATGCAGGGCCTATTGCACCAGGCCAGATGAGAGAACCAAGGGGAAGTGACATAGCAGGAACTACTAGTACCCTTCAGGAACAAATAGGATGGATGACAAATAATCCACCTATCCCCGTAGGAGACATCTATAAACAATGGATAATCATGGGATTAAATAAAATAGTAAGAATGTATAGCCCTACCAGCATTCTAGACATAAGACAAGGACCAAAGGAACCCTTTAGAGACTATGTAGACCGGTTCTATAAAACTCTAAGAGCAGAGCAGGCTTCACAGGAGGTAAAAAATTGGATGACAGAAACCTTGTTGGTCCAAAATGCAAACCCAGATTGCAAGACCATTTTAAAAGCACTGGGACCAGCAGCTACACTAGAAGAGATGATGACAGCATGTCAGGGAGTGGGGGGACCCGGCCATAAAGCAAGAGTTTTGGCTGAAGCAATGAGCCAAGTGACAAATTCAGCTACCATAATGATGCAGAAAGGCAATTTTAAGAACCAAAACAGGACTATTAAGTGTTTCAATTGTGGTAAAGTAGGGCACATAGCCAGAAATTGCAGGGCCCCCAGGAAAAAGGGCTGCTGGAAATGTGGAAAGGAAGGACACCAAATGAAAGATTGTACTGAGAGACAGGCTAATTTTTTAGGGAAAATCTGGCCTTCCCACAAGGGGAGGCCAGGGAATTTCCTTCAGAGCAGACCAGAGCCAACAGCCCCACCAGAAGAGAGCTTCAGGTTTGGGGAAGAGACAACAACTCCCTCTCAGAAGCAGGAGCCGATAGACAAGGAAAGGTGTCCTTTAGCTTCCCTCAGATCACTCTTTGGCAACGACCCCTCGTCACAATAAAGATAGGGGGGCAACTAAAGGAAGCTCTATTAGATACAGGAGCAGATGACACAGTATTAGAAGAAATGAATTTGCCAGGAAGATGGAAGCCAAAAATGATAGGGGGAATTGGGGGTTTTATCAAAGTAAGACAGTATGATCAGATACTCATAGAAATCTGTGGACACAAAGCTATAGGTACAGTATTAGTAGGACCTACACCTGTCAACATAATTGGAAGAAATCTGTTGACTCAGATTGGCTGCACTTTAAATTTTCCCATTAGTCCTATTGAAACTGTACCAGTGAAATTAAAGCCAGGAATGGATGGCCCAAAAGTTAAACAATGGCCATTGACAGAAGAAAAAATAAAAGCATTAGTAGAAATTTGTACAGAAATGGAAAAGGAAGGAAAAATTTCAAAAATTGGGCCTGAAAATCCATACAATACTCCAGTATTTGCCATAAGGAAAAAAGACAGTACTAAATGGAGAAAATTAGTAGATTTCAGAGAACTTAATAAGAGAACTCAAGACTTCTGGGAAGTTCAATTAGGAATACCACATCCCGCAGGGTTAAAGAAGAAAAAATCAGTAACAGTACTGGATGTGGGTGATGCATATTTTTCAGTTCCCTTAGATAAAGACTTCAGGAAGTATACTGCATTTACCATACCTAGTACAAACAATGAAACGCCAGGAATTAGATATCAGTACAATGTGCTGCCACAAGGATGGAAAGGATCACCAGCAATATTCCAGAGTAGCATGACAAAAATCTTAGAGCCTTTTAGAAAGCAAAATCCAGACATAGTTATCTATCAATACATGGATGACTTGTATGTAGGATCTGACTTGGAAATAGGGCAGCATAGAGCAAAAATAGAAGAACTGAGACAACATCTGTTGAGGTGGGGGTTTACCACACCAGACAAAAAACATCAGAAAGAACCACCATTCCTTTGGATGGGTTATGAACTCCATCCTGATAAATGGACAGTACAGCCTATAGTGCTGCCAGAAAAAGACAGCTGGACTGTCAATGACATACAGAAGTTAGTGGGAAAATTGAATTGGGCAAGTCAGATTTATGCAGGGATTAAAGTAAAGCAATTATGTAAACTCCTTAGGGGAACCAAATCACTAACAGAAATAGTGCCACTAACAGCAGAAGCAGAGCTAGAACTAGCAGAAAACAGGGAGATTCTAAAAGAACCAGTACATGGAGTGTATTATGACCCATCAAAAGACTTAATAGCAGAAATACAGAAGCAAGGGCAAGGCCAATGGACATATCAAATTTATCAAGAGCCATTTAAAAATCTGAAAACAGGAAAGTATGCAAGAATGAGGGGTACCCACACTAATGATGTAAAACAATTAACAGAAGCAGTGCAAAAAATAACCACAGAAAGCATAGTAATATGGGGAAAGATTCCTAAGTTTAAACTACCCATACAAAAAGAAACGTGGGAAGCATGGTGGATAGAGTATTGGCAAGCCACCTGGATTCCTGAGTGGGAATTTGTCAATACCCCTCCCTTAGTGAAATTATGGTACCAGTTAGAGAAAGAACCCATAGTAGGGGCAGAAACTTTCTATGTAGATGGGGCAGCTAATAGGGAAACTAAATTAGGAAAAGCAGGATATGTTACTGACAGAGGAAGACAAAAAGTTGTCCCCTTAACGGACACAACAAATCAGAAGACTGAGTTACAAGCAATTCATCTAGCTTTGCAGGATTCGGGATTAGAAGTAAACATAGTAACAGACTCACAATATGCATTAGGAATCATTCAAGCACAACCAGATAAGAGTGAATCAGAAATAGTCAGTAAAATAATAGAGCAGTTGATAAACAAGGAAAAGGTCTACTTGGCATGGGTACCAGCACACAAAGGAATTGGAGGAAATGAACAGGTAGATAAATTAGTCAGTTCTGGAATCAGGAAAGTACTATTTTTAGATGGAATAGATAAGGCCCAAGAAGAACATGAGAAATATCACAATAATTGGAGAGCAATGGCTAGTGATTTTAACATACCACCTGTGGTGGCAAAAGAAATAGTAGCCAGCTGTGATAAATGTCAGCTAAAAGGAGAAGCTATGCATGGACAAGTAGACTGTAGTCCAGGAATATGGCAGCTAGATTGTACACACTTAGAAGGAAAAGTTATCCTGGTAGCAGTTCATGTAGCCAGTGGATATATAGAAGCAGAAGTTATTCCAGCAGAGACAGGGCAAGAGACAGCATACTTTATCTTAAAATTAGCAGGAAGATGGCCAGTAAAAACAATACACACAGACAATGGTAGCAATTTCACCAGTACTACAGTCAAGGCCGCCTGTTGGTGGGCGGGTATCAAGCAGGAATTTGGCATTCCCTACAATCCCCAAAGTCAAGGAGTAATAGAATCTATGAATAAAGAATTAAAGAAAATTATAGGACAGGTAAGAGATCAGGCTGAACATCTTAAGACAGCAGTACAAATGGCAGTATTCATTCACAATTTTAAAAGAAAAGGGGGGATTGGGGGGTACAGTGCAGGGGAAAGAATAGTAGACATAATAGCAACAGACATACAAACTAAAGAATTACAAAAGCAAATTACAAAAATTCAAAATTTTCGGGTTTATTACAGGGACAGCAGAGATCCACTTTGGAAAGGACCAGCAAAGCTTCTCTGGAAAGGTGAAGGGGCAGTAGTAATACAAGATAATAGTGACATAAAAGTAGTGCCAAGAAGAAAAGTAAAGATCATTAGGGATTATGGAAAACAGATGGCAGGTGATGATTGTGTGGCAAGTAGACAGGATGAGGATTAGTACATGGAAAAGTTTAGTGAAATACCATATGTATATTTCAGGGAAAGCTAAGGGATGGTTTTATAAACATCACTATGAAAGCCCTCATCCAAGAATAAGTTCAGAAGTACACATCCCACTAGGGGATGCTAGATTAGTAATAACAACATATTGGGGTCTGCATACAGGAGAAAGAGACTGGCATTTGGGTCAGGGAGTCTCCATAGAATGGAGGAACAGGAGATATAAAACACAAGTAACTCCTGACCTAGCAGACCAACTAATTCATCTGTATTATTTTGATTGTTTTTCAGAATCTGCTATAAGACATGCCATATTAGGACGTATAGTTAGACCTAGGTGTGATTATCAAGCAGGACATAACAAGGTAGGATCCCTACAGTACTTGGCACTAACAGCATTAATAAAACCAAAAAGGATAAAGCCACCTTTGCCCAGTGTCAGGAAACTGACAGAGGATAGATGGAACAAGCCCCAGAAGACCAAGGGCCACAGAGGGAGCCATACAATGAATGGACACTAGAACTTCTAGAGGAACTTAAGAGTGAAGCTGTTAGACATTTTCCCAGGTCATGGCTCCATAGCTTAGGGCAATATATCTATGAAACTTATGGGGATACTTGGGCAGGAGTGGAAGCCATAATAAGAATTCTACAACAACTGCTGTTTATTCATTTCAGAATTGGATGTCAACATAGCAGAATAGGCATACAGAGAAGAGCAAGAAATGGAGCCCGTAGATCCTAGACTAGAGCCCTGGAAGCATCCAGGAAGTCAGCCTAGAACTGCTTGTAACAAGTGCTATTGTAAAAAGTGTTGCTTTCATTGCCAAGTTTGTTTCATAACAAAAGGCTTAGGCATCTCCTATGGCAGGAAGAAGCGGAGACAGCGACGAAGAGCTTCTCAAGACAGTCAGACTCATCAAGCAGCTCTACCAAAGCAGTAAGTAGTATATGTAATGCAACCTTTACAGATATTATCAATATTAGCATTAGTAGTAGCAGCAATACTAGCAATAGTTGTGTACACCATAGTATTCATAGAATATAGGAAAATAAAAAGGCAAAGAAAAATAGACAGGTTACTTGATAGAATAATAGAAAGAGCAGAAGACAGTGGCAATGAGAGCGAGGGGGATCAGGAAGAATTGTCAGCACTTGTGGAGATGGGGCATCATGCTCCTTGGGATGTTGATGATCTGTAGTGCTACAGAAAAGCTGTGGGTCACAGTCTATTATGGGGTACCTGTGTGGAAAGAAGCATCCACCACTCTATTTTGTGCATCAGATGCTAAAGCAGTTGACACAGAGGTGCATAATGTTTGGGCCACACATGCCTGTGTACCCACAGACCCTAATCCACAAGAAATAGTATTGGGAAATGTGACAGAAAATTTTAATGCATGGGAAAATAACATGGTAGACCAGATGCATGAGGATATAATCAGTTTATGGGATCAAAGCCTAAAGCCATGTGTAAAATTAACCCCACTCTGTGTTACTTTACATTGCACTGAAATTACTCTAAAGTGCAATACTAGTACTAATGCTAATACTAGTACGTCAAATTGCAATGGCACTAATTGGAATAGTAGTAGTGAATGGGAAGAGATGAAGAAAGAAATGACAAACTGCTCTTTCAATATCACCACAAGCATAAAAGATAAGATACAGAAAGAATATGCACTTTTACATAAACTTGATATAATGCCAATAGCTAATGATAATAAAAGCTATGCATTGATAAACTGTAACACCTCAGTCATTACACAGGCCTGTCCAAAGGTAACCTTTGAACCAATTCCCATATATTATTGTACCCCGGCTGGTTTTGCGATTATAAAATGTAATGATAAAAAGTTCAATGGAACAGGACCATGTACAAATGTCAGCACAGTACAATGTACACATGGAATTAGGCCAGTAGTGTCAACTCAACTGCTGTTAAATGGCAGTCTAGCAGAAGGAGAAATAAAAATTAGATCTAAAAATATATCAGACAATGCTCAAATCATAACAGTACAGCTGAATGAAACTGTAGAAATTAATTGTACAAGACCCAGCAACAATACAAGAAAAAGTATACACATAGGAGTGGGGAGAGCACTTTATGCAACAGGAGATATAATAGGAGACATAAGACAAGCACATTGTAACCTTAGCAGTACAAAATGGAACAACACTTTAAGACAGGTAGCTAAAAAATTAACAGAACTATTTAATAATAAAACAATAGTCTTTAATCGATCCTCAGGAGGGGACCTAGAAATTGTAATGCATAGTTTTAATTGTGGAGGGGAATTTTTCTACTGTAATACAACAGAATTGTTTAATAGTACTTGGCCGTTTAATAGTACTGAAAATAAGGCTAACGAGTCAGGGACAAGTGAAAGAAATATCACACTCCCATGCAGAATAAAACAAATTATAAACAGGTGGCAGGAAGTAGGAAAAGCAATGTATGCCCCTCCCATCCAAGGACGAATTAGCTGTTCATCAAAAATTACAGGGATGCTATTAACAAGAGATGGTGGTAAAGGGAACGAGACAAGGAACGATACCGAGACCTTCAGACCTGCAGGAGGAGATATGAAGGACAATTGGAGAAGTGAATTATATAAATATAAAGTAGTAAAAATTGAGCCATTAGGAATAGCACCCACCAGGGCACAGAGAAGAGTGGTGCAGAGAGAAAAAAGAGCAGTGGGAATGATAGGAGCTATGTTCCTTGGGTTCTTGGGAGCAGCAGGAAGCACTATGGGCGCAGCGTCAGTGACGCTGACGGTACAGGCCAGACAATTATTGTCTGGTATAGTGCAGCAGCAGAACAATCTGCTGAGGGCTATTGAGGCGCAACAGCATCTGTTGCAACTCACAGTCTGGGGCATCAAGCAGCTCCAGGCAAGAGTCCTGGCTGTGGAAAGATTCCTAAAGGATCAACAGCTCCTAGGGATTTGGGGTTGCTCTGGAAAACTCATTTGCACCACTGCTGTGCCCTGGAATACTAGTTGGAGTAATAAATCGCTGAATCAGATTTGGGACAACATGACCTGGATGGAGTGGGAGAGAGAAATTGACAATTACACAAGCTTAATATACTCCTTAATTGAACAATCGCAGAACCAGCAGGAAAAGAATGAACAAGAATTATTGGAATTGGATAAGTGGGCAAGTTTGTGGAATTGGTTTAGCATAACAAATTGGCTGTGGTATATAAGAATATTCATAATGATAGTAGGAGGCTTAGTAGGTTTAAGAATAGTTTTTACTGTACTTGCTATAGTGAATAGAGTTAGGAAGGGATACTCACCATTGTCATTCCAGACCCGCCTCCCAGCCCCGAGGGGACCCGACAGGCCCGGAGGAATCGAAGAAGAAGGTGGAGGGAACGACAGCGACAGATCCGTTCGCTTAGTGGATGGATTCTTAGCTCTTATCTGGGACGACCTGCGGAGCCTGTGCCTCTTCAGTTACCACCGCTTGAGAGACTTACTCTTGATTGTAGCGAGGATTGTGGAACTTCTGGGACGCAGGGGGTGGGAAGCTCTCAAATACTGGTGGAATCTCCTACAGTATTGGAGTCAGGAATTAAAGAATAGTGCTGTTAGTTTGCTTAATGCCGCAGCTATAGCAGTAGCTGAGGGGACAGATAGGGTTATAGAAGTAGTACAAAGACTTTGTAGAGCTATTCTACACATACCTACAAGAATAAGACAGGGCTTAGAAAGGGCTTTGCTGTAAGATGGGGGGCAAGTGGTCAAAACATAAGATGGGTGGATGGCCTGCTGTGAGGGAAAGAATGAGACGAACTAGGCCAACAAATGAGCCAGCAGCAGAGGGGGTGGGAGCAGTATCTCGAGACTTGGACAAACATGGAGCAATCACAAGTAGCAATACAGCAGCTACTAATAGTGATTGTGCCTGGCTGGAAGCACAAGAGGAGGA
>B.FR.92.92FR_BX08_AY713411_F1.BE.93.VI850_AF077336
GCGAGAGCGTCAGTATTAAGTGCGGGGGAATTAGATAAATGGGAAAAAATTCGGTTAAGGCCAGGAGGAAAGAAAAAATATAGACTAAAACATATAGTATGGGCAAGCAGGGAGCTAGAACGATTCGCAGTTAATCCTGGCCTGTTAGAAACATYAGAAGGCTGTAGACAGATACTGGGACAGCTACAACCATCCCTTCAGACAGGATCAGAAGAACTTAGATCATTATTTAATACAGTAGCAACCCTTTATTGTGTACATCAAAAGGTAGATGTAAGAGACACCAAAGAAGCTTTAGAGAGGATAGAGGAAGAGCAAAACAAAAGTAAGAAAAAAGCACAGCAAGCAACAGCAGCAGCTGACAYAGGAAACAGCAGCCAGGTCAGCCAAAATTACCCTATAGTGCAGAACATACAGGGGCAAATGGTACATCAGGCCATATCACCTAGAACTTTAAATGCATGGGTAAAAGTAGTAGAAGAGAAGGCTTTCAGCCCAGAAGTAATACCCATGTTTTCAGCATTATCAGAAGGAGCCACCCCACAAGATTTAAACACCATGCTAAACACAGTGGGGGGACATCAAGCAGCCATGCAAATGTTAAAAGATACCATCAATGAGGAAGCAGCAGAATGGGATAGATTGCATCCAGTGCAGGCAGGGCCTATTGCACCAGGCCAGATAAGAGAMCCAAGGGGAAGTGACATAGCAGGAACCACTAGTACCCTTCAGGAACAAATAGGATGGATGACGCGTAATCCACCTATCCCAGTAGGAGACATCTATAAAAGATGGATAATCATGGGGTTAAATAAAATAGTGAGAATGTATAGCCCTACCAGCATTCTGGACATAAAACAAGGACCAAAAGAACCCTTTAGAGATTATGTAGACCGGTTCTATAAAACTCTAAGAGCCGAGCAAGCTTCACAGGATGTAAAAAATTGGATGACAGAAACCTTGTTGGTCCAAAATGCGAACCCAGACTGTAAAACTATTTTAAAAGCATTGGGGCCAGCAGCTACACTAGAAGAAATGATGACAGCATGTCAGGGAGTGGGGGGACCCGGCCATAAAGCAAGAGTTTTGGCTGAAGCAATGAGTCAAGTAACAAATTCAGCTACCATAATGATGCAGAAAGGCAATTTTAGGAACCAAAGAAAGACTGTTAAGTGTTTTAATTGTGGCAAAGAAGGGCACATAGCCAAAAATTGCAGGGCCCCTAGGAAAAAGGGCTGTTGGAAATGCGGGAAGGAAGGACACCAAATGAAAGATTGCAATGAGAGACAGGCTAATTTTTTAGGGAAAATCTGGCCTTCCCACAAGGGAAGGCCAGGGAATTTTCTTCAGAGCAGACCAGAGCCAACAGCCCCACCAGAAGAGAGCTTCAGGTTTGGGGAAGCAACAACTCCCTCTCAGAAGCAGGAGCCGATAGACAAGGAACTGTATCCTTTAGCTTCCCTCAAATCACTCTTTGGCAACGACCCCTCGTCACAATAAAAATAGGGGGGCAACTAAAGGAAGCTCTATTAGATACAGGAGCAGATGACACAGTATTAGAAGACATGAATTTGCCAGGAAGATGGAAACCAAAAATGATAGGGGGAATTGGAGGTTTTATCAAAGTAAGACAGTATGATCAGATACTCATAGAAATTTGTGGRCATAAAGCTATAGGTACAGTATTAGTAGGACCTACACCTGTCAACATAATTGGAAGAAATCTGTTGACTCAGATTGGTTGCACCTTAAATTTTCCCATTAGTCCTATTGAAACTGTACCAGTAAGATTAAAGCCAGGAATGGATGGCCCAAAAGTTAAACAATGGCCATTGACAGAAGAAAAAATAAAAGCATTAGTAGAAATTTGTACAGAAATGGAAAAGGAAGGGAAAATTTCAAAAATTGGGCCTGAAAATCCATACAATACTCCAGTATTTGCCATAAAGAAAAAAGACAGTACTAAATGGAGAAAATTAGTAGATTTCAGAGAACTTAATAAAAGAACTCAAGACTTCTGGGAAGTTCAATTAGGAATACCACATCCGGCAGGGTTAAAAAAGAAAAAATCAGTAACAGTCCTGGATGTGGGTGATGCATATTTTTCAGTTCCCTTACATGAAGACTTTAGAAARTATACTGCATTTACTATACCTAGCATAAACAATGAGACACCAGGGATCAGGTATCAGTACAATGTGCTTCCACAGGGATGGAAAGGATCACCAGCAATATTCCAATGTAGCATGACAAAAATCTTGGAGCCTTTTAGAAAACAAAATCCAGACATAGTTATCTATCAATACATGGATGATTTGTATGTAGGATCTGACTTAGAAATAGGGCAGCATAGAACAAAAATAGAGAACCTAAGACAACATCTGTTGAGGTGGGGGTTTACCACACCAGACAAAAAACATCAGAAAGAACCTCCATTCCTTTGGATGGGTTATGAACTCCATCCTRATAAATGGACAGTACAGCCTATAGTGCTGCCAGAAAAAGACAGCTGGACTGTCAATGACATACAGAAGTTAGTGGGAAAATTGAATTGGGCAAGTCAGATTTATGCAGGAATTAAAGTAAAGCAATTATGTAAGCTCCTTAGGGGAACCAAAGCACTAACAGAAGTAATACCACTAACAGAAGAAGCAGAGCTAGAACTAGCAGAAAACAGGGAGATTCTAAAAGAGCCAGTACATGGAGTGTATTATGACCCATCAAAAGACTTAGTAGCAGAAATACAGAAGCAGGGGCAAGGCCAATGGACGTATCAAATTTATCAAGAGCCATTTAAAAATCTGAAAACAGGAAAGTATGCAAGAATGAGGGGTGCCCACACTAATGATGTAAAACAGTTAACAGAGGCAGTGCAAAAAATAGCCCAAGAAAGCATAGTAATATGGGGAAAGACTCCTAAATTTAAACTACCCATACAAAAGGAAACATGGGAAGCATGGTGGATGGAGTATTGGCAAGCCACCTGGATTCCTGAATGGGAGTTTGTCAATACCCCTCCCTTAGTAAAATTATGGTACCAGTTAGAGAGAGAACCCATAGCAGGAGCAGAAACGTTCTATGTAGATGGGGCAGCTAATAGGGAGACTAAATTAGGAAAAGCAGGGTATGTTACTGACAGAGGAAGACAAAAGGTTGTCTCCCTAACTGACACAACAAATCAGAAGACTGAGTTACAAGCAATTCATCTAGCTTTGCAGGATTCGGGACTAGAAGTAAACATAGTAACAGACTCACAATATGCACTAGGAATCATTCAAGCACAGCCAGATAAAAGCGAATCAGAGCTAGTTAGTCAAATAATAGAGCAGTTAATAAAAAAGGAAAAGGTCTACCTAGCATGGGTACCAGCACACAAAGGAATTGGAGGAAATGAACAAGTAGATAAATTAGTCAGTACTGGAATCAGGAAAGTACTATTTTTGGATGGAATAGATAAGGCCCAAGAAGATCATGAGAAATATCACAGTAATTGGAGAGCAATGGCTAGTGATTTTAACCTGCCACCTGTAGTAGCAAAAGAAATAGTAGCCAGCTGTGATAAATGTCAGCTAAAAGGAGAAGCCATGCATGGACAAGTAGACTGTAGTCCAGGAATATGGCAGCTAGATTGTACACATTTAGAAGGAAAAATTATCCTGGTAGCAGTTCATGTAGCCAGTGGATACATAGAAGCAGAAGTCATTCCAGCAGAGACAGGGCAGGAAACAGCATACTTTCTTTTAAAATTAGCTGGTAGATGGCCAGTAAAAACAATACATACAGATAATGGCAGCAATTTCACCAGTACTACAGTTAAGGCCGCATGTTGGTGGGCAGGGATCAAGCAGGAATTTGGCATTCCCTACAATCCCCAAAGTCAAGGAGTAGTAGAATCTATGAATAACGAATTAAAGAAAATTATAGGACAGGTAAGAGATCAGGCTGAGCATCTTAAGACAGCAGTACAAATGGCAGTATTCATCCACAATTTTAAAAGAAAAGGGGGGATTGGGGGGTACAGTGCAGGGGAAAGAATAGTAGACATAATAGCAACAGACATACAAACTAAAGAACTACAAAAACAAATTACAAAAATTCAAAATTTTCGGGTTTATTACAGGGACAGCAGAGATCCACTTTGGAAAGGACCAGCAAAGCTTCTCTGGAAAGGTGAAGGGGCAGTAGTAATACAAGATAATAGTRATATAAAAGTAGTGCCAAGAAGAAAAGCAAAGATCATTAGGGATTATGGAAAACAGATGGCAGGTGATGATTGTGTGGCAAGTAGACAGGATGAGGATTAGAACATGGAACAGTTTAGTAAAACATCATATGTATGTTTCACGGAAAGCTGAGAAATGGGTTTATAGACATCACTATGAAAGCACTAATCCAAGAATAAGTTCAGAGGTATACATCCCACTAGGGGATGCTAAATTAGCAATAACAACATATTGGGGTCTGCATACAGGAGAAAGAGACTGGCATTTGGGTCAGGGGGTCTCCATAGAATGGAGGAAAAAGAGATATAGCACACAAGTAGACCCTGACCTAGCAGACCAACTGATTCATCTGTATTATTTTGATTGTTTTTCAGACTCTGCTATAAGAAAGGCCATATTAGGACGTATAGTTAGGCCTAGTTGTGAATATCAAGCAGGACATAACAAGGTAGGATCTCTACAATACTTGRCACTAGCAGCATTAATAAAACCAAAAAGGACAAAGCCACCTTTGCCTAGTGTTAGGAAACTGACAGAGGATAGATGGAACAAGCCCCAGAAGACCAAGGGCCACAGAGAGAGCCATACAATGAATGGGCACTACAGATTTTAGAGGAGCTTAAGAGTGAAGCTGTGAGACACTTTCCTAGGATATGGCTACATAACTTAGGACAATATATCTATGAAACTTATGGGGATACTTGGGCAGGAGTGGAAGCCATAATAAGAATACTGCAACAACTGCTGTTTATTCATTTCAGGATTGGGTGTCACCATAGCAGAATAGGCATTACTCCACAAAGGAGAACAAGAAATGGAGCCAGTAGATCCTAGACTAGAGCCCTGGAAGCATCCAGGAAGTCAGCCTMAGACTYCTTGTACCAATTGCTATTGTAAAAAGTGTTGCYTTCATTGCCAATGGTGCTTTACAACGAAGGGCTTAGGCATCTCCTATGGCAGGAAGAAGCGGAGACAGCGACACAGAACTCCTCAAAGCAGTCAAGTGCATCAAAATTCTCTATCAAAGCAGTAAGTAGTACATGTAATGCAATCTTTAGAAATATTAGCAATAGTAGCATTAGTAGTAGCAGTAATAATAGCAATAGTTGTGTGGACCATAGTAGGCATAGAATTTAGGAAAATATTAAGACAAAGAAAAATAGACAGGTTACTTGATAGAATAAGAGAAAGAGCAGAAGACAGTGGCAATGAAAGTGAAGGAGACCAGGAAGAATTATCAGCACTTGTGGAAATGGGGCACCATGCTCCTTGGGATGTTAATGATCTGTAGTGCTGCAGACCAATTGTGGGTCACAGTCTATTATGGGGTACCTGTGTGGAAAGATGCAACTACCACTCTGTTCTGTGCATCAGATGCTAAAGCATATGATAAAGAAGTACATAATGTTTGGGCCACACATGCCTGTGTACCCACAGACCCCAACCCACAAGAAGTAGTATTGGGAAATGTGACAGAAAATTTTAACATGGGGAAAAATAACATGGTAGAACAGATGCATGAAGATATAATCAGTTTATGGGATCAAAGCCTAAAGCCATGTGTAAAATTAACCCCACTCTGTGTTACTTTAAATTGCACTGAGTTGAAGAATAGTACTGATACCAATTTGGGAACACAAGAAATGAAAAACTGCTCTTTCAACATCACCACAAGTGTAAGAAATAAGATGAAGAGAGAATATGCACTTTTTTATAGTCTTGATATAGTACCAATAGATAATGATAATACTAGATATAGGTTAAGAAGTTGTAATACCTCAATCATTACACAGGCCTGTCCAAAGGTATCCTTTGAGCCAATTCCCATACATTTTTGTGCCCCGGCTGGTTTTGCGATTCTAAAGTGTAACAATAAAACGTTCAATGGAACAGGACCATGTACAAATGTCAGCACAGTACAATGTACACATGGAATTAGGCCAGTAGTATCAACTCAACTGCTGTTAAATGGCAGCCTAGCAGAAGAAGAGGTAGTAATTAGATCTGAAAATTTCACAAACAATGCTAAAACCATAATAGTACAGCTAAATGAATCTGTAGAAATTAATTGTACAAGACCCAACAACAATACAAGAAAAAGTATACATATAGGACCAGGGAGAGCATTTTATACAACAGGAGATATAATAGGAGATATAAGACAAGCACATTGTAACATTAGTAGAACAAACTGGACTAACACTTTAAAAAGGGTAGCTGAAAAATTAAGAGAAAAATTTAATAATACAACAATAGTCTTTAATCAATCCTCAGGAGGGGACCCAGAAATTGTAATGCACAGTTTTAATTGTGGAGGGGAATTTTTCTACTGTAATACAACACAACTGTTTAATAGTACTTGGAATGAAACTAACAGTGAAGGAAATATCACCAGTGGAACTATAACACTCCCATGCAGAATAAAACAAATTATAAACATGTGGCAGGAAGTAGGAAAAGCAATGTATGCCCCTCCCATCGGAGGACAAATTAAATGTTTGTCAAACATCACAGGGCTGTTATTAACAAGAGATGGTGGTAGTGATAACAGTAGTAGTGGGAAAGAGATCTTCAGACCTGGAGGGGGAGATATGAGGGACAATTGGAGAAGTGAATTATATAAATATAAGGTAGTAAAAATTGAACCATTAGGAATAGCACCCACCAAGGCAAAGAGAAGAGTGGTGCAGAGAGAAAAAAGAGCAGTGGGAATAGGAGCCATGTTCCTTGGGTTCTTGGGAGCAGCAGGAAGCACTATGGGCGCAGCGTCACTAACGCTGACGGTACAGGCCAGACAATTATTGTCTGGTATAGTGCAGCAGCAAAACAATTTGCTGAGGGCTATTGAGGCGCAACAGCACCTGTTGCAACTCACAGTCTGGGGCATCAAGCAGCTCCAGGCAAGAGTCCTGGCTCTGGAAAGATACCTACAGGATCAACGGTTCCTAGGGATGTGGGGTTGCTCTGGAAAACTCATCTGCACCACTGCTGTGCCTTGGAATGCTAGTTGGAGTAATAAAAATCTGAGTCAGATTTGGGATAACATGACCTGGATGGAGTGGGAGAGAGAAATAAGCAATTACACAGAGATAATATACAGCTTAATTGAAGAATCGCAGAACCAACAAGAAAAGAATGAACTAGACTTATTACAATTGGATAAGTGGGCAAGTTTGTGGAATTGGTTCAACATAACAAATTGGCTGTGGTATATAAAAATATTCATAATGATAGTAGGAGGCTTGATAGGTTTAAGAATAGTTTTTACTGTACTTTCTATAGTGAATAGAGTTAGGCAGGGATACTCACCATTATCATTCCAGACCCGCCTCCCAGTTCCGAGGGGACCCGACAGGCCCGAAGGAATCGAAGAAGAAGGTGGAGAGAGAGACAGAGACAGATCCACACGATTAGTAACTGGATTCTTACCACTCATCTGGGACGACCTGCGGAGCCTGTTCCTCTTCAGCTACCACCGCTTGAGAGACTTACTCTTGATTGTAGCAAGGATTGTGGAACTTCTGGGACGCAGGGGGTGGGAGATCCTCAAATATTGGTGGAATCTCCTGCAGTATTGGAGTCAGGAACTAAAAAATAGTGCTGTCAGTTTGCTTAACGCTACAGCTATAGCAGTAGCTGAGGGGACAGATAGGGTTATAGAAGTAGTACAAAGAATTTGGAGAGGTATTCTCCACATACCTACAAGAATTAGACAGGGCTTCGAAAGGGCTTTGCTATAAAAATGGGTGGCAAGTGGTCAAAAATGGTTGGATGGTCTACTGTAAGGGAAAGAATGAAAAGAGCTGAGCCAGCAGCAGAAGGGGTGGGAGCAGTATCGCGAGACCTGGAAAAACATGGAGCAATCACARGTAGCAATACATCACATAGTAATGCTGCCTGTGCCTGGCTGGAAGCACAAGAGRAGGA
>B.NL.86.H434_8_F4_AY970947_F2.CM.97.CM53657_AF377956
ACACAACAAGGCTACTTCCCTATTAGCAGAACTACACACCAGGGCCAGGGACCAGATTTCCACTGACCTTTGGATGGTGCTTCAAGCTAGTACCAGTTGATCCAGATGAGGTAGAAAAGGCCAATGAGGGAGAGAACAACAGCTTGTTACACCCTATGAGCCTGCATGGGATGGAGGACAAGGAGAAAGAAGTATTAGTGTGGAAGTTTGACAGCCGCCTAGCATTTCATCACATGGCCCGAGAGCTGCATCCGGAGTACTACAAAGACTGCTGACATCGAGCTTTCTACAAGGGACTTTCCGCTGGGGACTTTCCAAGGAGGTGTGGCCTGGGCGGGACTGGGGAGTGGCGAGCCCTCAGATGCTGCATATAAGCAGCTGCTTTTGCCTGTACTGTGTGTCTCTGGTTAGACCAGATCNGAGCCTGGGAGCTCTCTGGCTAGCTAGGGAACCCACTGCTTAAGCCTCAATAAAGCTTGCCTTGAGTGCTTAAAGTAGTGTGTGCCCGTCTGTTGTGTGACTCTGGTAACTAGAGATCCCTCAGACCCTTTTAGTCAGTGTGGAAAAATCTCTAGCAGTGGCGCCCGAACAGGGACNTGAAAGTGAAAGTATAACCAGAGGAGCTCTCTCGACGCAGGACTCGGCTTGCTGAAGCGCGCACGGCAAGAGGCGAGGGGCGGCGACTGGTGAGTACGCCTAAAATTTTGACTAGCGGAGGCTAGAAGGAGAGAGATGGGTGCGAGAGCGTCAGTATTAAGCGGGGGAGAATTAGATAAATGGGAAAAAATTCGGTTAAGGCCAGGGGGAAAGAAAAAATATCGCTTAAAACATATAGTATGGGCAAGCAGGGAGCTAGAACGATTCGCAGTTAATCCTGGCCTGTTAGAAACAGCAGAAGGCTGCAGACAAATACTGGGACAGCTACAACCAGCCCTTCAGACAGGATCAGAAGAACTTAGATCATTATTTAATACAGTAGCAACCCTCTATTGTGTACATCAAAAAATAGAGGTAAAAGACACCAAGGAAGCTTTAGACAAGATAGAGGAAGAGCAAAACAAAAGTAAGAAAAAGGCACAGCAAGCAGCAGCTGGCACAGGAAACAACAGCCAGGTCAGCCAAAATTACCCTATAGTGCAGAACCTACAGGGGCAAATGGTGCATCAGGCCATATCACCTAGAACTTTAAATGCATGGGTAAAAGTAGTAGAAGAGAAGGCTTTCAGCCCAGAAGTAATACCCATGTTTTCAGCATTATCAGAAGGAGCCACCCCACAAGATTTAAACACCATGCTAAACACAGTGGGGGGACATCAAGCAGCCATGCAAATGTTAAAAGAGACCATCAATGAGGAAGCTGCAGAATGGGATAGATTGCATCCAGTGCATGCAGGGCCTATTGCACCAGGCCAGATGAGAGAACCAAGGGGAAGTGACATAGCAGGAACTACTAGTACCCTTCAGGAACAAATAGGATGGATGACAAATAATCCACCTATCCCAGTAGGAGAAATCTATAAAAGATGGATAATCATAGGATTAAATAAAATAGTAAGAATGTATAGCCCTACCAGCATTCTGGACATAAGACAAGGACCAAAGGAACCCTTTAGAGATTATGTAGACCGGTTCTATAAAACTCTAAGAGCCGAGCAAGCTTCACAGGAAGTAAAAAATTGGATGACAGAAACCTTGTTGGTCCAAAATGCGAACCCAGATTGTAAAACTATTTTAAAAGCATTGGGACCAGCAGCTACACTAGAAGAAATGATGACAGCATGTCAGGGAGTAGGGGGACCCGGCCATAAAGCAAAAGTTTTGGCTGAAGCAATGAGCCAAGTAACAAATTCAGCTACCACAATGATGCAGAGAGGCAATGTTAGGAACCAAAGAAAGACTGTTAAGTGTTTCAATTGTGGCAAAGAAGGGCACATAGCCAAAAACTGCAGGGCCCCTAGGAAAAAGGGCTGTTGGAAATGTGGAAGGGAAGGACACCAAATGAAAGATTGTATTGAGAGACAGGCTAATTTTTTAGGGAAAATCTGGCCTTCTCACAAGGGAAGGCCAGGGAATTTTCTTCAGAGCAGACCAGAGCCAACAGCCCCACCAGAAGAGAGCTTCAGGTTTGGGGAAGAGACAACAACTCCCTCTCAGAAGCAGGAGCCGATAGACAAGGAACTGTATCCTTTAGCTTCCCTCAGATCACTCTTTGGCAACGACCCCTCGTCACAATAAAGATAGGGGGGCAACTAAAGGAAGCTCTATTGGATACAGGAGCAGATGATACAGTATTAGAAGACATGAATTTGCCAGGAAAATGGAAACCAAAAATGATAGGGGGAATTGGAGGTTTTATCAAAGTAAGACAGTATGATCAGATACCCTTAGAAATCTGCGGACATAAAGCTATAGGTACAGTATTAGTAGGACCTACACCTGTCAACATAATTGGAAGAAATCTGTTGACTCAGATTGGTTGTACTTTAAATTTTCCCATTAGTCCTATTGAAACTGTACCAGTAAAATTAAAGCCAGGAATGGATGGCCCAAAAGTTAAACAATGGCCATTGACAGAAGAAAAAATAAAAGCATTAGTAGAAATTTGTACAGAAATGGAAAAGGAAGGAAAAATTTCAAAAATTGGGCCTGAAAATCCATACAATACTCCAGTATTTGCCATAAAGAAAAAAGACAGTACTAAGTGGAGGAAATTAGTAGATTTCAGAGAACTTAATAAGAGAACTCAAGACTTTTGGGAAGTTCAATTGGGAATACCACATCCCGCAGGGTTAAAAAAGAAAAAATCAGTAACAGTACTGGATGTGGGTGATGCATACTTTTCAGTTCCCTTAGATAAAGACTTCAGAAAGTATACTGCATTTACCATACCTAGTATAAACAATGAAACACCAGGGATTAGATATCAGTACAATGTGCTTCCACAGGGATGGAAAGGATCACCAGCAATATTCCAAAGTAGCATGACAAAAATCTTAGAGCCTTTTAGAAAACAAAATCCAGACATGGTTATCTACCAATACATGGATGATTTGTATGTAGGATCTGACTTAGAAATAGGGCAGCATAGAACAAAGATAGAGGAATTGAGACAACATCTGTTGAGTTGGGGATTTACCACACCAGACAAAAAGCATCAGAAAGAACCTCCATTCCTTTGGATGGGTTATGAACTCCATCCTGATAAATGGACAGTACAGCCTATAATGCTGCCAGAAAAAGACAGCTGGACTGTCAATGACATACAGAAGTTAGTGGGAAAGTTGAATTGGGCAAGTCAGATTTATGCAGGGATTAAAGTAAGGCAATTATGTAAACTCCTTAGGGGAACCAAAGCACTAACAGAAGTAATACCACTAACAAAAGAAGCAGAGCTAGAGCTGGCAGAAAACAGGGAGATTCTAAAAGTACCAGTACATGGAGTATATTATGACCCATCAAAAGACTTAGTAGCAGAAATACAGAAGCAGGGGCTAGGCCAATGGACATATCAAATTTATCAAGGGCCATTTAAAAATCTGAAAACAGGAAAGTATGCAAGAATGAGGGGTGCCCACACTAATGATGTAAAACAGTTAACAGAAGCAGTGCAAAAAATAGCCACAGAAAGCATAGTAATATGGGGAAAGACTCCTAAATTTAAACTACCCATACAAAAGGAAACATGGGAAGCATGGTGGATGGAGTATTGGCAAGCCACCTGGATTCCTGAATGGGAGTTTGTCAATACCCCTCCCTTAGTGAAATTATGGTACCAGTTAGAGAAAGAACCCATAGTAGGAGCAGAAACTTTCTATGTAGATGGGGCAGCTAATAGGGAGACTAAATTAGGAAAAGCAGGATATGTTACTGACAGAGGAAGACAAAAAGTTGTCTCCCTAACTGACACAACAAATCAAAAGACTGAGTTACAAGCAATTCATCTAGCTTTGCAGGATTCGGGATTAGAAGTAAACATAGTAACAGACTCACAATATGCATTAGGAATCATTCAAGCACAACCAGATAAGAGTGAATCAGAGATAGTCAGTCAAATAATAGAGCAGTTAATAAAAAAGGAAAAAGTCTACCTGGCATGGGTACCAGCACACAAAGGAATTGGAGGAAATGAACAAGTAGATAAATTAGTCAGTGCTGGAATCAGGAAAGTACTATTTTTGGATGGAATAGATAAGGCCCAAGAAGACCATGAGAAATATCATAGTAATTGGAGAGCAATGGCTAATGATTTTAACCTGCCACCTATAGTAGCAAAAGAAATAGTAGCCAGCTGTGATAAATGTCAGATAAAAGGAGAAGCCATGCATGGACAAGTAGACTGTAGTCCAGGAATATGGCAACTAGATTGTACACATTTAGAAGGAAAAATTATCCTGGTAGCAGTTCATGTCGCCAGTGGATATATAGAAGCAGAAGTTATTCCAGCAGAGACAGGGCAGGAAACAGCATACTTTCTCTTAAAATTAGCAGGAAGATGGCCAGTAAAAACAATACATACAGACAATGGCAGCAATTTCACCAGTACTACGGTTAAGGCTGCCTGTTGGTGGGCAGGGATCAAGCAGGAATTTGGCATTCCCTACAATCCCCAAAGTCAAGGAGTAGTAGAATCTATGAATAAAGAATTAAAGAAAATTATAGGACAGGTAAGAGATCAGGCTGAACATCTTAAGACAGCAGTACAAATGGCAGTATTCATCCACAATTTTAAAAGAAAAGGGGGGATTGGGGGGTACAGTGCAGGGGAAAGAATAATAGACATAATAGCAACAGACATACAAACTAAAGAATTACAAAAACAAATTACAAAAATTCAAAACTTTCGGGTTTATTACAGGGACAACAGAGATCCACTTTGGAAGGGACCAGCAAAGCTTCTCTGGAAAGGTGAAGGGGCAGTAGTAATACAAGATAATAGTGACATAAAAGTAGTGCCAAGAAGAAAAGTAAAGATCATTAGAGATTATGGAAAACAGATGGCAGGTGATGATTGTGTGGCAAGTAGACAGGATGAGGATTAGAACATGGAAAAGTTTAGTAAAACACCATATATATATTTCAAAGAAAGCTAAGGGATGGGTTTATAGACATCACTATGAAAGCACTCATCCAAGAATAAGTTCAGAAGTACACATCCCACTAGGGGATGCTAGATTAGTAATAACAACATATTGGGGTCTGCATACAGGAGAAAGAGACTGGCATTTGGGTCAGGGAGTCTCCATAGAATGGAGGAAAGAGAGATATAGCACACAAGTAGACCCTGGCATAGCAGACCAACTAATTCATCTATATTATTTTGATTGTTTTTCAGAGTCTGCTATAAGAAATGCCATATTAGGACGTTTAGTTAGTCCTAGGTGTGAACATCAAGCAGGACATAACAAGGTAGGATCTCTACAGTATTTGGCACTAGTAGCATTAATAACACCAAAAAAGATAAAGCCACCTTTGCCTAGTGTTAAGAAACTGACAGAGGATAGATGGAACAAGCCCCAGAAGACCAAGGGCCACAGAGGGAGCCATACAATGAATGGACACTAGAGCTTTTGGAGGAACTTAAGAATGAAGCTGTTCGACATTTTCCTAGGATATGGCTCCATAGCTTAGGACAATATATCTATGAAACTTATGGGGATACTTGGGCAGGAGTGGAAGCCATAATAAGAAGTCTGCAACAACTGCTGTTTATTCATTTCAGAATTGGGTGTCGACATAGCAGAATAGGCATTCAACAGAGGAGAGGAAGAAGAAATGGAGCCAGTAGATCCTAGACTAGAGCCCTGGAAGCAGCCAGGAAGTCAGCCTAGGACTGCTTGTACCAATTGCTATTGTAAAAAATGTTGCTTTCATTGCCAAGTTTGTTTCACAAGAAAAGGCTTAGGCATCTCCTATGGCAGGAAGAAGCGGAGACAGCGACGAAGACCTCCTCAGGACAGTCAGACTCATCAAGCTTCTCTATCAAAGCAGTAAGTAGTACATGTAATGCAATCTTTACAAATATTAGCAATAGTAGCATTAGTAGTAACAGCAATAATAGCAATAGTTGTGTGGACCATAGTAGTCATAGAATATAGGAAAATATTAAGACAAAGAAAAATAGACAGGTTAATTGATAGAATAAGAGAAAGAGCAGAAGACAGTGGCAATGAAAGCGAGGGGGACCAGGAAGAATTATCAGCACTTGTGGAGATGGGGCACCATGCTCCTTGGGATGTTGATGATCTGTAGTGCTACAGAGAAATTGTGGGTCACAGTCTATTATGGGGTACCTGTGTGGAAAGAAGCAACCACCACTCTATTTTGTGCATCAGATGCTAAAGCATATGATACAGAGGTACATAATGTTTGGGCCACACATGCCTGTGTACCCACAGACCCCAGCCCACAAGAAGTAGTATTGGCAAATGTGACGGAAAATTTTAACATGTGGAAAAATAACATGGTAGAACAAATGCATGAGGACATGATCAGTTTATGGGATCAAAGCCTAAAGCCATGTGTAAAATTAACCCCACTCTGTGTTACTTTAAATTGCACTAATTTAAGGAATGCTACTAATACCACTGCTACTAATACCACTAGTAGTGGATGGGGAGAAGAAATGACAAACTGCTCTTTCAATATCACCACAAGCATAAGAGATAAGGTTCGGCGAGAATATGCACTTTTTTATAAACTTGATGTAGTACCAATAGATAAGAATACTACTAAATATAGGTTGATAAATTGTAACACCTCAGTCATTACACAGGCCTGTCCAAAGGTATCATTTGAGCCAATTCCCATACATTATTGTACCCCGGCTGGTTTTGCGATTCTAAAGTGTAATGATAAGAAGTTCAATGGAACAGGACCATGTACAAATGTCAGCACAGTACAATGTACACATGGAATTAGGCCAGTAGTGTCAACTCAACTGCTGTTAAATGGCAGTCTGGCAGAAGGAGGGGTAGTAATTAGATCTGAAAATTTCACGAACAATGCTAAAACCATAATAGTACAGCTGAATGAATCTATAGAAATTAATTGTACAAGACCCAACAACAATACCAGAAAAAGTATACATATAGGACCGGGGAGAGCATTCTATGCAACAGGAGAAATAATAGGAGATATAAGACAAGCACATTGTAACATTAGTAGAGGAAAATGGAATAACACTTTAAAACAGATAGTTACAAAATTAAAAGAACAATATGGGAATAAAACAATAGTATTTAATTCATCCTCAGGAGGGGACCCAGAAATTGTAATGCACAGTTTTAATTGTGGAGGGGAATTTTTCTACTGTAATTCAACACAACTGTTTAATAGCACTTGGAAAGATACTGGAGAGTTAAATAACCCTGAAGGAAATAGCAACATCACACTCCCATGTAAAATAAAACAAATTATAAACAGGTGGCAGGGAGTAGGAAAAGCAATGTATGCCCCTCCCATCAGAGGACAAATTAGATGTTCATCAAATATTACAGGGCTGCTATTAACAAGAGATGGTGGTAACAACGTGAATAATACCACCGAGGTCTTCAGACCTGGAGGAGGAGATATGAGGGACAATTGGAGAAGTGAATTATATAAATATAAAGTAGTAAAAATTGAACCATTAGGAGTAGCACCTACCAAGGCAAAGAGAAGAGTGGTGCAGAGAGAAAAAAGAGCAGTGGGAACGATAGGAGCTATGTTCCTTGGATTCTTGGGAGCAGCAGGAAGCACTATGGGCGCAGCGTCTGTGGCGCTGACGGTACAGGCCAGACAATTATTGTCCGGTATAGTGCAACAGCAGAATAATTTGCTGAGGGCTATTGAGGCGCAACAACATCTGTTGCAACTCACAGTCTGGGGCATCAAGCAGCTCCAGGCAAGAGTCCTGGCTGTGGAAAGATACCTAAAGGATCAACAGCTCCTAGGGATTTGGGGTTGCTCTGGAAAACTCATCTGCACCACTGCTGTGCCTTGGAATGCTAGTTGGAGTAATAAATCTCTGAATAAGATTTGGGATAACATGACCTGGATGGAGTGGGAAAGAGAAATTGAAAATTACACAAGCTTAATATACACCTTAATTGAAGAACCGCAGAACCAGCAAGAAAAGAATGAACAAGAATTATTGGAATTAGATAAGTGGGCAAGTTTGTGGAATTGGTTTGACATAACAAACTGGCTGTGGTATATAAAAATATTCATAATGATAGTAGGAGGCTTGGTAGGTTTAAGAATAGTTTTTGCTGTACTTTCTATAGTGAATAGAGTTAGGCAGGGATACTCACCATTATCATTCCAGACCCGCCTCCCAGCCCCGAGGGGACCCGACAGGCCCGACGGAATCGAAGAAGAAGGTGGAGAGAGAGACAGAGACAGATCCGGACGATTAGTGACTGGATTCTTAGCACTCATCTGGGACGATCTGCGGAGCCTGTGCCTCTTCAGCTACCACCGCTTGAGAGACTTACTCTTGATTGTAGCGAGGATTGTGGAACTTCTGGGACGCTGGGTGTGGGAAGCCCTCAAATATTGGCGGAACCTCCTGCAGTATTGGAGTCAGGAACTAAAGAATAGTGCTGTTAGTTTGCTTAATGCCACAGCTATAGCAGTAGCTGAGGGGACAGATAGGATTATAGAAGTACTGCAAAGAGCTGGTAGAGCTATTCTCCACATACCTAGAAGAATAAGACAGGGTGCAGAAAGGGCTTTGCTATAAAATGGGTGGCAAGTGGTCAAAAAGTAGTGGATGGTCTGCCATAAGGGAAAGAATGAGACGAACTAAGCCAGCAGCAGAGGGGGTAGGAGCAGTATCTCGAGACTTGGAAAAACATGGAGCAATCACAAGTAGCAATACAGCAGCTACTAATGCTGATTGTGCCTGGCTAGAAGCACAAGAGGAGGA
>B.BO.99.BOL0122_AY037270_G.CM.96.96CMABB55_AY772535
GCGAGAGCGTCGGTATTAAGTGCGGGGGAATTAGATAAATGGGAGAAAATTCGGTTACGGCCAGGGGGAAAGAAAAAATACAGATTAAAACATATAGTATGGGCAAGCAGAGAGCTAGAACGATTTGCAGTCAATCCTGGCCTTTTAGAAACATCAGGGGGCTGTAGACAAATACTGGGACAGCTACAACCGTCCCTTCAAACAGGATCAGAAGAACTTAGATCATTATATAATACAGTAGCAGTCCTCTTTTGTGTGCATCAAAAGATAGAGGTAAAAGACACCAAGGAAGCTTTAGACAAGATAGAGGAAGAGCAAAACAAAAGTAAGAAAAAAGCACAGCAAGCAGCGGCTGACACAGGAAACAGCAATGGAAACAGCAATCAGGTCAGCCACAATTTCCCTATAGTGCAGAACCTTCAGGGGCAGATGGTACATCAGTCCCTATCACCTAGAACTTTAAATGCATGGGTAAAAGTAATAGAAGAGAAGGCTTTCAGCCCAGAAGTAATACCCATGTTTTCAGCATTATCAGAAGGAGCCACCCCACAAGATTTAAACACCATGCTAAACACAGTGGGGGGACATCAAGCAGCCATGCAAATGTTAAAAGAGACCATCAATGAGGAAGCTGCCGAATGGGATAGATTGCACCCAGCACAGGCAGGGCCTATTGCACCAGGCCAGATAAGAGAACCGAGGGGAAGTGACATAGCAGGAACTACTAGCACCCTTCAGGAACAAATAACATGGATGACAAATAATCCACCTATCCCAGTAGGAGAAATCTATAAAAGATGGATAATCCTGGGACTAAATAAAATAGTAAGGATGTATAGCCCTGTCAGCATTTTGGACATAAGACAGGGACCAAAGGAGCCTTTTAGAGACTATGTAGACCGATTCTATAAAACTTTAAGGGCTGAACAAGCTTCACAGGAGGTAAAAAATTGGATGACAGAAACCTTATTGGTCCAAAATTCAAACCCAGATTGTAAGACTATCTTAAAAGCATTAGGACCAGGAGCTACACTAGAAGAAATGATGACAGCATGTCAGGGAGTGGGAGGACCCGGCCACAAAGCAAGAGTTTTGGCTGAAGCAATGAGCCAAGTAACAGGGTCAGCCACCGTAATGATGCAGCGAGGCAATTTTAAGTATACAAAAAAGACTGTTAAATGTTTCAATTGTGGCAAAGAGGGGCACATAGCCAGAAATTGCAGAGCCCCGAGAAAAAAGGGCTGTTGGAAATGTGGAAAGGAAGGACACCAAATGAAAGAGTGTACTGAAAGACAGGCTAATTTTTTAGGGAAAATCTGGCCTTCCCACAAAGGGAGGCCAGGGAATTTTCTTCAGAGCAGACCAGAGCCAACAGCCCCACCAGAGGAGAGCTTCAGGTTTGGGGAAGAGACAACAACCCCCTTTCAGAAGCAGGAACAGAAAGACAGGGGACTGTATCCTCCTTTGGATTCCCTCAAATCACTCTTTGGCAACGACCCCTAGTCAAAATAAAAGTAGGGGGGCAACTAAAGGAAGCTCTATTAGATACAGGAGCAGATGATACAGTACTAGAAGACATGAATTTGCCAGGAAAATGGAAACCAAAAATGATAGGGGGAATTGGAGGTTTTATCAAAGTAAAGCAGTATGATCAGATACCCATAGAAATCTGCGGGCATAAAGCTATAGGTACAGTATTAGTAGGACCTACACCTGTCAACATAATTGGAAGAAATTTGTTGACTCAGATTGGTTGCACTTTAAATTTTCCCATTAGTCCTATTGAAACTGTACCAGTAAAATTAAAGCCAGGAATGGATGGCCCGAAAGTTAAACAATGGCCATTGACAGAAGAAAAAATAAAAGCATTAGTAGAAATTTGCACAGAAATGGAAAAGGAAGGGAAAATTTCAAAAATTGGGCCTGAAAATCCATACAATACTCCAGTATTTGCTATAAAGAAAAAAGACAGTACTAAATGGAGAAAATTAGTAGATTTCAGAGAACTTAATAAAAGAACTCAAGACTTCTGGGAAGTTCAATTAGGAATACCACATCCAGCAGGGTTAAGAAAGAAAAAATCAGTAACAGTACTGGATGTGGGTGATGCATATTTTTCAGTTCCCTTAGATGAAGACTTCAGGAAGTATACTGCATTTACCATACCTAGTACAAACAATGAGACACCAGGGATCAGATATCAGTACAATGTGCTGCCACAGGGATGGAAAGGATCACCAGCAATATTCCAATGTAGCATGACAAAAATATTAGAGCCTTTTAGAAAGCAAAATCCAGACATAGTTATCTATCAATACATGGATGATTTGTATGTAGGATCTGACTTAGAAATAGGGCAGCATAGAACAAAAATAGAGGAACTAAGACAACATTTGTTGAAGTGGGGGTTAACCACACCAGATAAAAAACATCAGAAAGAACCTCCATTCCTTTGGATGGGTTATGAACTCCATCCTGATAAATGGACAGTACAGCCCATAGTGCTGCCACATAAAGACAGCTGGACTGTCAATGACATACAGAAGTTAGTGGGAAAACTGAATTGGGCAAGTCAGATTTATCCAGGGATTAAGGTAAAGCAACTATGTAAACTCCTTAGGGGAACCAAAGCGCTAACAGAAGTAATACCACTAACAGAAGAAGCAGAGCTAGAACTGGCAGAAAACAGGGAGATTCTAAAAGAACCAGTACATGGAGTGTATTATGACCCATCAAAAGACTTAATAGCAGAACTACAGAAGCAAGGGGAAGGTCAATGGACATACCAAATTTTTCAAGACCCATTTAAAAATCTGAAAACAGGAAAGTATGCACGAGCGAAGGGTGCTCATACTAATGATATAAAACAATTAACGGAGGCAGTGCAAAAAATAGCCACAGAAAGCATAGTAATATGGGGAAAGACTCCTAAATTTAAACTACCCATACAAAAGGAAACATGGGAAACATGGTGGACAGAGTATTGGCAAGCCACCTGGATTCCCGAGTGGGAGTTTGTCAATACCCCTCCCTTAGTGAAATTATGGTACCAATTAGAGAAAGACCCCATAGAAGGAGTAGAAACTTTCTATGTAGATGGGGCAGCTAATAGGGAGACCAAATTAGGAAAAGCAGGATATGTTACTAATAGAGGAAGACAAAAAGTTGTCTCCCTAACTGACACAACAAATCAGAAGACTGAGTTACAAGCAATTTATTTAGCTTTGCAGGATTCAGGACCAGAAGTAAACATAGTAACAGACTCACAATATGCATTAGGAATCATTCAAGCACAACCAGATAGGAGTGAATCAGAGATAGTCAGTCAAATAATAGAACAGTTAATAAAAAAGGAAAAGGTCTACCTGGCATGGGTACCAGCACACAAAGGAATTGGAGGAAATGAACAAGTAGACAAATTAGTCAGTGCTGGAGTCAGGAAAGTACTATTTCTGGATGGAATAGATAAGGCCCAAGATGAGCATGAGAAATATCACAGTAATTGGAGAGCAATTGCTAGTGATTTTAACCTGCCACCTGTAGTAGCAAAACAAATAGTAGCTAACTGTGATAAATGTCAGGTAAAGGGAGAAGCCATGCATGGACAAGTAGACTGTAGTCCAGGAATATGGCAACTAGATTGTACACATTTAGAAGGAAAAATTATCCTGGTAGCAGTTCATGTAGCCAGTGGATATATAGAAGCAGAAGTTATCCCAGCAGAAACAGGGCAGGAAACAGCATACTTTATCTTAAAATTAGCAGGAAGGTGGCCAGTAAAAACAATACATACAGACAATGGCAGCAATTTCACCAGTAATGCGGTCAAGGCCGCCTGCTGGTGGGCAGGGGTCAAGCAGGAATTTGGCATTCCCTACAATCCCCAAAGTCAAGGAGTAGTAGAATCTATGAATAATGAATTAAAGAAAATTATAGGACAAGTAAGAGATCAAGCTGAACACCTTAAGACAGCAGTACAAATGGCAGTATTCATTCACAATTTTAAAAGAAAAGGGGGGATTGGGGGGTATAGTGCAGGGGAAAGAATAGTAGACATAATAGCAACAGACATACAAACTAAAGAACTACAAAAACAAATTACAAAAATTCAAAATTTTCGGGTTTATTACAGGGACAGCAGAGATCCACTTTGGAAAGGACCAGCAAAGCTCCTCTGGAAAGGTGAAGGGGCAGTAGTAATACAAGATAATAGTGACATAAAAGTAGTGCCAAGGAGAAAAGCAAAGATCATTAGGGATTATGGAAAACAGATGGCAGGTGATGATTGTGTGGCAAGTAGACAGGATGAGGATTAAAACATGGAAAAGTTTAGTAAAACACCATATGTATATTTCAAAGAAAGCTAAGGGATGGTGTTATAGACATCACTATGAAAACCTTCATCCAAGAATAAGTGGAGAAGTACACATCCCATTAGGACCTGCTAAATTGGTGATAACAACATATTGGGGCCTGCATACAGGAGAAAGAGACTGGCATTTGGGTCAGGGAGTCTCCATAGAATGGAGAAAGGAGAGATATGCAACACAAGTAACCCCTGACATAGCAGACCAACTAATTCATCTGTATTATTTTGATTGTTTTGCAGACTCTGCTATAAGAAAGGCCATATTAGGACGTATAGTTAGCCCTAGTTGTGACTTTCGAGCAGGACATAACAAGGTAGGATCTCTACAGTACTTGGCACTAGCAGCATTAGTAACACCAAAAAAGACAAAGCCACCTTTGCCTAGTCTTCAGATACTGACAGAGGATAGATGGAACAAGCCCCAGAAGACCAAGGGCCACAGAGAGAGCCACACAATGAATGGACACTAGAACTTTTAGAAGAGCTTAAGAGTGAAGCTGTTAGACATTTTCCTAGGACGTGGCTCCAGGGCTTGGGACAACATATCTATGAAACTTATGGGGATACTTGGGCAGGAGTGGAAGCCATAATAAGAATACTGCAACAACTGCTGCTTATTCATTTCAGAATTGGGTGTCGACATAGCAGAATAGGCATCACTTACCAGAAAAGAGCAAGAAATGGAGCCAGTAGATCCTAGACTAGAGCCCTGGAAGCATCCAGGAAGTCAGCCTAAAACTGCTTGTACCAATTGCTATTGCAAAAAGTGTTGCTTTCATTGCCAAGTTTGTTTTATAAAAAAAGGCTTAGGCATCTCCTATGGCAGGAAGAAGCGGAGACAGCGACGAAGATCTCCTCCAGACAGTCAGACTCATCAAGTTCCTCTACCAAAGCAGTGAGTAGTATATGTAATGCAATCTTTAATAATATTAGCAATAGTAGCATTAGTAGTAGCAGCAATACTAGCAATAGTTGTGTGGACTATAGTATTCATAGAATATAGGAAAATACTAAGACAAAGAAAAATAGATAGGTTAATTGATAGAATAAGAGAAAGAGCAGAAGACAGTGGCAATGAGAGTGAAGGGGATCAAGATGAATTGTCAGTACTTGTGGGGATGGAGCACCATGATGCTCCTTGGGATGTTAATGATCTGTAGTGCTACAGAACAATTGTGGGTCACAGTCTATTATGGGGTACCTGTGTGGAAAGAAGCAACCACCACTCTATTTTGTGCATCAGATGCTAAAGCATATAGTACAGAGAAACATAATATTTGGGCCACACATGCCTGTGTACCCACAGACCCCAACCCACAAGAAGTACCATTGGAAAATGTGACAGAAAATTATAACATGTGGAAAAATAACATGGTAGAACAGATGCATGAGGATATAATCAGTTTATGGGATCAAAGCCTAAAGCCATGTGTAAAACTAACCCCACTTTGTGTCACTTTAAACTGTACTAATGTAACCATAAGTAATAATAGTACAGGAGATATGAAAAACTGCTCTTTCAATATCACTGCAGGAATAAAGGATAAGGTAAAGAAAGAATATGCACTTTTTTATAATCTTGATGTAGTACCCATAGATGATGATAATGGTAGTACCACCTATAGGTTGATAAATTGTAATACCTCAATTATTACACAAACCTGTCCAAAGGTAACCTTTGAGCCAATTCCCATACATTATTGTACTCCAGCTGGTTTTGCAATTCTAAAATGTAATGATAAGAATTTCAATGGAACAGGACCATGTAAAAATGTCAGCACAGTACAATGTACACATGGAATTAGACCAGTAGTGTCAACTCAACTGCTGTTAAATGGCAGTCTAGCAGAGGAAGAAATAGTAATTAAATCTGAAAATTTCACGGACAATGCTAAAACCATAATAGTACAGCTGAATAAATCTATATCAATTAATTGTACAAGACCCAATAACAATACAAGAAAAAGTATAAATATAGGACCAGGGAGAGCACTTTATGCAACAGGAGAAATAATAGGAAACATAAGGCAAGCACATTGTAACATTAGTGCAACAGAATGGAATAACACTTTAGAACAGATAGTCACAAAATTAGGAGAACAATTTGGGGTAAATAAAACAATAATCTTTAATCAATCCTCAGGAGGGGACCCAGAAATTGTAATGCACAGTTTTAATTGTGGAGGGGAATTCTTCTACTGTAATACAACAGAACTGTTTAATAGTACTTGGAATTTTACTAGTACCTGGAATATGACTAGTGGGTCAAATTACTCTGCAGAAAGAAATATCATCACACTCTCATGCAGAATAAAACAAATTATAAACATGTGGCAGGAAGTAGGAAAAGCAATGTATGCCCCTCCTATCAGAGGACAAATTAAATGTTCATCAAATATTACAGGGCTGCTATTAACAAGAGATGGTGGGGATAATAACAGAAGCACCGAGACCTTTAGACCTGGAGGAGGAAATATGAGAGACAATTGGAGAAGTGAATTATATAAATATAAAGTAGTAAAAATTGAACCATTAGGAGTAGCACCCACCAGGGCAAGGAGAAGAGTGGTGCAAAGAGAAAAAAGAGCAGTGGGAACGATAGGAGCTATGTTCCTTGGGTTCTTGGGAGCAGCAGGAAGCACTATGGGCGCAGCGTCAGTGACGCTGACGGTACAAGCCAGACAATTATTGTCTGGTATAGTGCAGCAGCAGAACAATCTGCTGAGGGCTATTGAGGCGCAACAGCATATGTTGCAACTCACAGTCTGGGGCATCAAGCAGCTCCAGGCAAGACTCCTGGCTGTGGAAAGATACCTAAGGGATCAACAGCTCCTAGGGATTTGGGGATGCTCTGGAAAACTCATTTGCACCACTAATGTGCCCTGGAATAGTAGTTGGAGTAATAAATCTCTGAGTAAGATTTGGGATAACATGACCTGGATGGAGTGGGAAAGAGAAATTGACAATTACACAGGCTTAATATATACTTTAATTGAAGAATCACAGAACCAACAAGAAAAGAATGAACAAGAATTATTAGAATTACATAAATGGGCAAGTTTGTGGAATTGGTTTGACATAACAAAGTGGCTATGGTATATAAAAATATTCATAATGATAGTAGGAGGTTTGGTAGGTTTAAGAATAGTCTTTGCTGTGCTTTCTATAGTAAATAGAGTTAGGCAGGGATACTCACCATTATCATTTCAGACCCGCCTCCCAACCCCGAGGGGACCCGACAGGCCAGAAGGAATCGAAGAAGAAGGTGGAGAGAGAGACAGAGACACATCCAGGCCGTTAGTGCATGGATTATTAGCACTCATCTGGGACGATCTACGGAGCCTGTGCCTCTTCAGCTACCACCGCTTGAGAGACTTACTCTTGATTGTAACGAGGATTGTGGAACTTCTGGGACGCAGGGGGTGGGAGATCCTCAAATACTGGTGGAATCTCCTACAGTATTGGGGTCAGGAACTAAAGAATAGTGCTGTTAGCTTGCTCAACGCCACAGCTATAACAGTAGCTGAAGGAACAGATAGGATCATAGAAATAGTACAAAGAGCTTATAGAGCTATTCTCCACATACCTACAAGAATAAGACAGGGCTTAGAAAGGGCTTTGCTATAAGATGGGTGGCAAGTGGTCAAAAAGTAAGGGATGGGCTGCTGTAAGGGAAAGAATGAGAAAAGCTGAGCCAGCAGCAGATGGGGTAGGAGCAGCATCTCGAGACCTGGAAAAACATGGAGCAATCACAAGTAGCAATACAGCAGAAACTAATGCAGATGTAGCCTGGCTAGAAGCACAAGAGGAGGAGGAGGTGGGCTTTCCAGTCAGACCTCAGGTACCTTTAAGACCAATGACTTACAAAGCAGCTATAGATCTCAGCCACTTTTTAAGAGAAAAGGGGGGACTGGAAGGGCTAGTTTACTCCCAAAGAAGAGTAGATATCCTTAATCTGTGGGTCTACCACACGCAAGGCTTCTTCCCAGATTGGCATAACTACACACCAGGGCCAGGGACCAGATGGCCACTGACCTTTGGATGGTGCTTCAAGCTAGTACCACTTGATCCAGACCAAGTAGAAAGAGCCAATGAAGGAGAGAACAACAGCCTGCTGCACCCTATGAGCCAACATGGGATGGATGACCCGGAGAAAGAAGTGTTGGTGTGGAAGTTTGACAGCCGCCTAGCCTTTCATCATATGGCCCGAGAGCTGCACCCAGAGTTCTACAAAGATTGATTGCTGACAGTGTTCTACAGAGAGTGCTGACAGAGAGTTTTCTACAAGGGACTTTCCACTGGGGACTTTCCAGGGGAGGCGTGGACTGGGCGGGACAGGGGAGTGGCGAGCCCTCAGATGCTGCATATAAGCAGCTGCTTTTTGCCTGTACTGGGTCTCTCTGGTTAGACCAGATCTGAGCCTGAGAGCTCTCTGGCTGACTAGGGAACCCACTGCTTAA
>B.NL.96.H434_42_A1_AY970948_H.BE.93.VI997_AF190128
TAGCAGAACTACACATCAGGGCCAGGGATCAGATATCCACTGACCTTTGGATGGTGCTTCAAGCTAGTACCAGTTGATCCAGATGAGGTAGAAAAGGCCAATGAGGGAGAGAACAACAGCCTGTTACACCCTATGAGCCTGCATGGGATGGAGGACAAGGAGAAAGAAGTACTAGTGTGGAAGTTTGACAGCCACCTAGCATTTCGTCACATGGCCCGAGAGCTGCATCCGGAGTACTACAAGAACTGCTGACATCGAGCTTTCTACAAGGGACTTTCCGCTGGGGACTTTCCAGGGAGGTGTGGCCTGGGCGGGACAGGGGAGTGGCGAGCCCTCAGATGCTGCATATAAGCAGCTGCTTTTTGCCTGTACTGGGTCTCTCTGGTTAGACCAGATCAGAGCCTGGGAGCTCTCTGGCTAGCTAGGGAACCCACTGCTTAAGCCTCAATAAAGCTTGCCTTGAGTGCTTCAAGTAGTGTGTGCCCGTCTGTTGTGTGACTCTGGTAACTAGAGATCCCTCAGACCCTTTTAGTCAGTATGGAAAATCTCTAGCAATGGCGCCCGAACAGGGACGCGAAAGCGAAAGTAGAACCAGAGGAGCTCTCTTGACGCAGGACTCGGCTTGCTGAAGCGCGCGCGGCAAGAGGCGAGGGGCGGCGGCTGGTGAGTACGCCNAAAAATTTTGACTAGCGGAGGCTAGAAGGAGAGAGATGGGTGCGAGAGCGTCAGTATTAAGCGGGGGAGAATTAGATAGATGGGAAAAAATTCGGTTAAGGCCAGGGGGAAAGAAAAAATATCGCTTAAAACATATAGTATGGGCAAGCAGGGAGCTAGAACGATTCGCAGTCAATCCTGGCCTGTTAGAAACAGCAGAAGGCTGCAGACAAATACTGGGACAGCTACAACCGTCCCTTCAGACAGGATCAGAAGAACTTAGATCATTATTTAATACAATAGCAACCCTCTATTGTGTACATCAAAGAATAGAGGTAAAAGACACCAAGGAAGCTTTAGACAAGATAGAGGAAGAGCAAAACAAAAGTAAGAAAAAGGCACAGCAAGCAGCAGCTGGCGCTGGCACAGGAAACAACAGCCAGGTCAGCCAAAATTACCCTATAGTGCAGAACCTACAGGGGCAAATGGTACATCAGGCCATATCACCTAGAACTTTAAATGCATGGGTAAAAGTAATAGAAGAAAAGGCTTTTAACCCAGAAGTAATACCCATGTTTACAGCATTATCAGAAGGAGCCACCCCACAAGATTTAAACACCATGCTAAACACAGTGGGGGGACATCAAGCAGCCATGCAAATGTTAAAAGAGACCATCAATGAGGAAGCTGCAGAATGGGATAGATTGCATCCAGTGCATGCAGGGCCTCCCGTACCAGGCCAGATGAGAGAACCAAGGGGAAGTGATATAGCAGGAACTACTAGTACCCTTCAGGAACAAATAGGATGGATGACAAGTAATCCACCTATCCCAGTAGGAGAGATCTATAAAAAATGGATAGTCATGGGATTAAATAAAATAGTAAGAATGTATAGCCCTGTCAGCATTCTGGACATAAGACAAGGACCAAAAGAACCCTTTAGAGACTATGTAGACCGGTTCTACAAAACTCTAAGAGCCGAGCAAGCTACACAGGAAGTAAAAAATTGGATGACAGAAACCTTGTTGGTCCAAAATGCGAACCCAGATTGTAAAACTATTTTAAAAGCATTGGGACCAGCAGCTACACTAGAAGAAATGATGACAGCATGCCAGGGAGTAGGGGGACCTGGCCATAAGGCAAGAATTTTGGCTGAAGCAATGAGCCAAGCAACAAATTCAGCTGCTATAATGATGCAGAAAGGCTATGTTAGGAACCAAAGAAAGACTGTTAAGTGTTTTAATTGTGGCAAAGAAGGGCACATAGCCAAAAACTGCAGGGCCCCTAGGAAAAAGGGCTGTTGGAAATGTGGAAGGGAAGGACACCAAATGAAAGATTGTACTGAGAGACAGGCTAATTTTTTAGGGAAAATCTGGCCTTCCCACAAGGGGAGGCCAGGGAATTTTCTTCAGAGCAGACCAGAGCCAACAGCCCCACCAGAAGAGAGCTTCAGGTTTGGGGAAGAGACAACAACTCCCTCTCAGAAGCAGGAGCCGATAGACAAGGAACTGTATCCTTTAGCTTCCCTCAAATCACTCTTTGGCAACGACCCCTCGTCACAATAAAGATAGGGGGGCAGCTAAAGGAAGCTCTATTAGATACAGGAGCAGATGATACAGTATTAGAAGACATGAATTTGCCAGGAAAATGGAAACCAAAAATGATAGGGGGAATTGGAGGTTTTATCAAAGTAAGACAGTATGATCAGATACCCTTAGAAATCTGCGGACACAAAGCTATAGGTACAGTATTAGTAGGACCTACACCTGTCAACATAATTGGAAGAAATCTGTTGACTCAGATTGGTTGTACTTTAAATTTTCCCATTAGTCCTATTGAAACTGTACCAGTAAAATTAAAGCCAGGAATGGATGGCCCAAAAGTTAAACAGTGGCCATTGACAGAAGAAAAAATAAAAGCATTAGTAGAAATTTGTACAGAAATGGAAAAGGAAGGAAAAATTTCAAAAATTGGGCCTGAAAACCCATACAATACTCCAATATTTGCCATAAAGAAAAAAGACAGTACTAAGTGGAGAAAATTAGTAGATTTCAGAGAACTTAATAAGAGAACTCAAGACTTTTGGGAAGTTCAATTGGGAATACCACATCCCGCAGGGTTAAAAAAGAAAAAATCAGTAACAGTACTGGATGTGGGTGATGCATACTTTTCAGTTCCCTTAGATAAAGACTTCAGAAAGTATACTGCATTTACCATACCTAGTGTAAACAATGAAACACCAGGGATTAGATATCAGTACAATGTGCTGCCACAGGGATGGAAAGGATCACCAGCAATATTCCAATGTAGCATGACAAAAATCTTAGAGCCTTTTAGAAAACAAAATCCAGACATAGTTATCTACCAATACATGGATGATTTGTATGTAGGATCTGACTTAGAAATAGGGCAGCATAGAACAAAAATAGAGGAATTGAGACAACATCTGTTGAAGTGGGGATTTACCACACCAGACAAAAAGCATCAGAAAGAACCCCCATTCCTTTGGATGGGTTATGAACTCCATCCTGATAAATGGACAGTACAGCCTATAGTGCTGCCAGAAAAAGACAGCTGGACTGTCAATGACATACAGAAGTTAGTGGGAAAGTTGAATTGGGCAAGTCAGATTTATGCAGGGATTAAAGTAAAGCAATTATGTAAACTCCTTAGGGGAGCCAAAGCACTAACAGAAGTAATACCACTAACAAAAGAAGCAGAGCTAGAGCTGGCAGAAAACAGGGAGATTCTAAAGGTACCAGTACATGGAGTATATTATGACCCATCAAAAGATTTAGTAGCAGAAATACAGAAGCAGGGGCTAGGCCAATGGACATATCAAATTTATCAAGAGCCATTTAAGAATCTGAAAACAGGAAAGTATGCAAGAATGAGGGGTGCCCACACTAATGATGTAAAACAGTTAACAGAGGCAGTGCAAAAAATAGCCACAGAAAGCATAGTAATATGGGGAAAGACTCCTAAATTTAAACTACCCATACAAAAGGAAACATGGGAAGCATGGTGGATGGAGTATTGGCAAGCCACCTGGATTCCTGAATGGGAGTTTGTCAATACCCCTCCCTTAGTGAAATTATGGTACCAGTTAGAGAAAGAACCCATAGTAGGGGCAGAAACTTTCTATGTAGATGGGGCAGCTAATAGGGAAACTAAATTAGGAAAAGCAGGATATGTTACTGACAGAGGAAGACAAAAAGTTGTCTCCCTAACTGACACAACAAATCAAAAGACTGAGTTACAAGCAATACATCTAGCTTTGCAGGATTCAGGATTAGAAGTAAACATAGTAACAGACTCACAATATGCATTAGGAATCATTCAAGCACAACCAGATAAGAGTGAATCAGAGATAGTCAGTCAAATAATAGAGCAGTTAATAAAAAAGGAAAAGGTCTACCTGGCATGGGTACCAGCACACAAAGGAATTGGAGGAAATGAGCAAGTAGATAAATTAGTTAGTTCTGGAATCAGAAAAGTACTATTTCTAGATGGGATAGACAAAGCTCAAGAAGCACATGAAAGGTATCACAACAATTGGAGAGCAATGGCTAGTGATTTTAACCTGCCACCTATAGTAGCAAAAGAAATAGTAGCCAGCTGTGATAAATGTCAGCTAAAAGGGGAAGCCATACATGGACAAGTAGACTGTAGTCCAGGAATATGGCAACTAGATTGTACACATTTAGAAGGAAAAATTATCCTGGTAGCAGTTCATGTCGCCAGTGGATATATAGAAGCAGAAGTTATCCCAGCAGAGACAGGGCAGGAAACAGCATACTTTCTTTTAAAATTAGCAGGAAGATGGCCAGTAAAAACAATACATACAGACAATGGCAGCAATTTCACCAGTACTACAGTTAAGGCTGCCTGTTGGTGGGCAGGGATCAAGCAGGAATTTGGCATTCCCTACAATCCCCAAAGTCAAGGAGTAGTAGAATCTATGAATAAAGAATTAAAGAAAATTATAGGACAGGTAAGAGATCAGGCTGAACATCTTAAGACAGCAGTACAAATGGCAGTATTCATCCACAATTTTAAAAGAAAAGGGGGGATTGGGGAGTACAGTGCAGGGGAAAGAATAATAGACATAATAGCAACAGACATACAAACTAAAGAATTACAAAAGCAAATTACAAAAATTCAAAATTTTCGGGTTTATTACAGGGACAACAGAGATCCACTTTGGAAGGGACCAGCAAAGCTGCTCTGGAAAGGTGAAGGGGCAGTAGTAATACAAGATAATAGTGACATAAAAGTAGTGCCAAGAAGAAAAGCAAAGATCATTAGAGATTATGGAAAACAGATGGCAGGTGATGATTGTGTGGCAAGTAGACAGGATGAGGATTAGAACATGGAAAAGTTTAGTAAAACACCATATATATATTTCAAAGAAAGCTAAGGGATGGCTTTATAAACATCACTATGAAAGCACTAATCCAAGAATAAGTTCAGAAGTACACATCCCACTAGGGGATGCTAGATTAGTAATAACAACATATTGGGGTCTGCATACAGGAGAAAGAGATTGGCATTTGGGTCAGGGAGTCTCCATAGAATGGAGGAAAGAGAGATATAGCACACAAGTAGACCCTGACATAGCAGACCAACTAATTCATCTATATTATTTTGATTGTTTTTCAGAATCTGCTATAAGAAATGCCATATTAGGACATTTAGTTAGTCCCAGGTGTGAATATCAAGCAGGACATAACAAGGTAGGGTCTCTACAGTATTTGGCACTAGTAGCATTGATANCACCAAAAAAGATAAAGCCACCTTTGCCTAGTGTTAAGAAATTGACAGAGGATAGATGGAACAAGCCCCAGAAAACCAAGGGCCACAGAGGGAGCCATACAATGAATGGACACTAGAGCTTTTGGAGGAACTTAAGAGTGAAGCTGTTAAACATTTTCCTAGAACATGGCTCCATAACTTTGGACAATATATCTATGACACTTATGGGGATACTTGGGCAGGAGTGGAAGCCTTAATAAGAAGTCTGCAACAACTGCTGTTTATCCATTTCAGAATTGGGTGCCGACATAGCAGAATAGGCATTCAACAGAGGAGAGGAAGAAGAAATGGAGCCAGTAGATCCTAGACTAGAGCCCTGGAAGCATCCAGGAAGTCAGCCTAGGACTGCTTGTACCAATTGCTATTGTAAAAAATGCTGCTTTCATTGCCAAGTTTGTTTCATAAAAAAAGGCTTAGGCATCTCCTATGGCAGGAAGAAGCGGAGACAGCGACGAAGACCTCCTCAGGACAGTCAGACTCATCAAACAGCTCTATCAAAGCAGTAAGTAGTACATGTAATGCAGCCTTTATACATATGGACAATAGTAGCATTAGTAGTAGCAGCAATAATAGCAATAGTTGTGTGGGCCATAGTAATCATAGAATATAGGAAAATATTAAGACAAAGAAAAATAGACAGGTTACTTGATAGAATAATAGAAAGAGCAGAAGACAGTGGCAATGAAAGCGAGGGGGACCAGGAAGAATTATCAGCACTTATGGAAATGGGGCACCATGCTCCAGCACTTAGGGAAATGGGGCATCATGCTCCTTGGGATGTTAATGATCTGTAGTGCTACAGAGAAATTGTGGGTCACAGTTTATTATGGGGTACCTGTGTGGAAAGAAGCAACCACCACTCTATTTTGTGCATCAGATGCTAAAGCATATGAAACAGAGGTGCATAATGTTTGGGCCACACATGCCTGTGTACCCACAGACCCCAACCCACAAGAAGTATTCTTGGGAAATGTGACAGAAAATTTTAACATGTGGAAAAATAACATGGTAGAACAAATGCATGAGGACATGATCAGTTTATGGGATCAAAGTCTAAAGCCATGTGTAAAATTAACCCCACTCTGTGTTACTTTAAATTGCATTGATGTAAATACTACTAATACCAATGTCAATGGTACTAATACCACTGTTAGTGAAGGGGGAAAAGATATGACAAACTGCTCTTTCAATATCACCACAAGCATAAGAGATAGGGTTCAGCGAGAATATGCACTTTTTTATAAACTTGATGTAGTACAAGTAGATGGTGATAATACCACATATAGGTTGATAAATTGTAACACCTCAGTCATTACACAAGCTTGTCCAAAGGTATCATTCGAGCCAATTCCCATACATTATTGTGCCCCGGCTGGTTTTGCGATTCTAAAATGTAATAATAATACGTGCAATGGATCAGGACCATGTACAAATGTCAGCACAGTACAATGTACACATGGAATTAGGCCAGTAGTGTCAACTCAATTACTGTTAAATGGCAGTTTGGCAAAAGAAGGGGTAGTACTTAGATCTGAAAATTTCACGGACAATGCTAAAAACATAATAGTACAGCTGAAGAATCCTGTAAACATTACTTGTACAAGACCTAACAACAATACCAGAAAAAGTATACATATAGGACCAGGGAGAGCATTCTATGCAACAGGAGATATAATAGGAAATATAAGACAAGCACATTGTAACATTAGTAGAGCACAATGGAATGACACCTTAAAACACATAGTTGCAAAATTACAAGAACAATATGGGAATAAAACAATACAATTTAAGGAATCTGCAGGAGGGGACCCAGAAATTGCAATGCACAGTTTCAATTGTGGAGGGGAATTTTTCTACTGTGATTCAACACAACTGTTTAATAGCACTTGGAACGAGACTGGAGCGATAAATGGCACTGTAGGAAATGACACCATCACACTCCAATGTAAAATAAAACAAATTATAAACAGATGGCAGGAAGTAGGGAAAGCAATGTATGCCCCTCCCATCAAAGGACTAATTAAATGTTCATCAAATATTACAGGGCTGCTATTAACAAGAGATGGTGGTAACGAAACTAATACCACCAAACCCAATGTCGAGGTCTTCAGACCTGGAGGAGGAGATATGAGGGACAATTGGAGAAGTGAATTATATAAATATAAAGTAGTAAGAATTGAACCATTAGGAGTAGCACCTACCAGGGCAAAGAGAAGAGTGGTGCAGAGAGAAAAAAGAGCAGTGGGAACGCTGGGAGCTGTGTTCCTTGGGTTCTTGGGAGCAGCAGGAAGCACCATGGGCGCAGCGTCAATGGCGCTGACGGTACAGGCCAGACAATTATTGTCTGGTATAGTGCAACAGCAGAATAATCTGCTGAGGGCTATTGAGGCGCAACAACATCTGTTGCAACTCACAGTCTGGGGCATCAAGCAGCTCCAGGCACGAGTCCTGGCTGTGGAAAGATACCTAAGAGATCAACAGCTCCTAGGGATTTGGGGTTGCTCTGGAAAACTCATCTGCACCACTGCTGTGCCTTGGAATGCTAGTTGGAGTAATAAATCTCAGGATGAGATTTGGAATAACATGACCTGGATGGAGTGGGAAAGAGAAATTGACAATTACACAAGCATAATATACAACTTAATTGAAAAATCGCAGAACCAGCAAGAAAAGAATGAACAAGAATTATTGGAATTAGATAAGTGGGACAGTTTGTTGAGTTGGTTTAGCATAACAAACTGGCTGTGGTATATAAAAATATTCATAATGATAGTAGGAGGCTTGATAGGTTTAAGAATAGTTTTTACTGTACTTTCTATAGTGAATAGAGTTAGGCAGGGATACTCACCATTATCATTCCAGACCCACCTCCCAGCTCCGAGGGGACCCGACAGGCCCGACGGAATCGAAGAAGAAGGTGGAGACAGAGACAGAGACAGATCCGTACGATTAGTGAATGGATTCTTACCACTCATCTGGGACGATCTGCGGAGCCTGTGCCTCTTCAGCTACCACCGCTTGAGAGACTTACTCTTGACTGTAGCGAGGATTGTGGAACTTCTGGGACGCAGGGGGTGGGAAGCCCTCAAATATTGGTGGAGTCTCCTGCAGTATTGGAGTCAGGAACTAAAGAATAGTGCTGTTAGTTTGCTTAATACTACAGCTATAGTAGTAGCTGAGGGGACAGATAGGATTATAGAAGTAGTACAAATAATCTGTAGAGCTATCCGCCACATACCTAGAAGAATAAGACAGGGCTTCGAAAGGGCTTTACTATAAGATGGGGGGCAAGTGGTCAAAATATAGTGGATGGTCTACCATAAGGGAAAGAATGAGAAGAACTAGGCCAACAGCAGAGGAAAGGATGAGACAACCTGAACCAGCAGCAGAGGGGGTAGGAGCAGCATCTCGAGACTTGGAAAAACATGGAGCAATCACAAGTAGCAATACAGCAGCTACTAATGCTGATTGTGCTTGGCTAGAAGCACAAGAGGAGGA
>B.CO.01.PCM034_AY561238_J.SE.93.SE7887_AF082394
GCGAGAGCGTCGGTATTAAGCGGGGGTGAATTAGATAGATGGGAGAGAATTCGGTTAAGGCCAGGGGGAAAGGAAAAATATAGATTAAAACATATAGTATGGGCAAGCAGGGAGCTAGAACGATTTGCAGTTAACCCTGGCCTGTTAGAGACATCAGAAGGCTGTAGACAAATACTGGAACAGCTACAACCATCCCTTCAGACAGGATCAGAAGAACTTAAATCAATATATAATTTAGTAGCATGCCTCTATTGTGTACATCGAAGGATAGAGGTAAAAGATACCAAGGAAGCTTTAGACAAGGTAGAGGAAGAGCAAAACAAAAGTAAGAAAAAAGCACAGCAAACAGCAGCTGACACAGGAAAAAGTGGCCAGGTCAGCCAAAATTACCCTATAGTGCAAAATCTTCAAGGGCAAATGGTACATCAGGCCATATCACCTAGAACCTTAAATGCATGGGTGAAAGTAATAGAAGAGAAGGCTTTCAGCCCAGAAGTAATACCCATGTTTTCAGCATTATCAGAAGGAGCCACCCCACAAGATTTAAACACCATGCTAAACACAGTGGGAGGACATCAAGCAGCCATGCAAATGTTAAAAGAGACCATCAATGAGGAAGCTGCAGAATGGGATAGATTGCATCCGGTGCATGCAGGGCCTACTGCACCAGGCCAGATGAGAGAGCCAAGGGGAAGTGACATAGCAGGAACTACTAGTACCCTTCAGGAACAGATAGGATGGATGACAAGTAATCCAGCCATCCCAGTAGGAGAAATCTATAAAAGATGGATAATCCTGGGATTAAATAAAATAGTAAGGATGTATAGCCCTGTCAGCATTCTGGACATAAGACAAGGACCAAAGGAGCCCTTTAGAGACTATGTAGATCGGTTCTATAAAACTTTAAGAGCCGAGCAAGCTTCACAGGATGTAAAAAATTGGATGACAGAAACCTTGTTGGTCCAAAATGCAAACCCAGATTGTAAAACTATTTTAAAAGCATTGGGGCCAGCAGCTACACTAGAAGAAATGATGACAGCATGTCAGGGAGTGGGAGGGCCCGGCCATAAAGCAAGAGTTTTGGCTGAAGCAATGAGCCAAGCAACAAATTCAGCTACCATAATGATGCAGAGGGGCAATTTTAGGAACCAAAGAAAGACTGTTAAGTGCTTCAATTGTGGCAAAGAAGGGCACATAGCAAAAAATTGCAGGGCTCCTCGGAAAAAGGGCTGTTGGAAATGTGGAAAGGAAGGACACCAAATGAAAGATTGTAGTGAGAGACAGGCTAATTTTTTARGGAAAATCTGGCCTTCCCACAAGGGGAGGCCAGGAAATTTCCTCCAGAGCAGGCCAGAGCCAACAGCCCCACCAGCAGAGAGCTTCAAGTTTGGGGAGGAGACAACAACTCCTCCCCCTCAGAAGCAGGAGCCGATAGACAAGGAACTGTATCCTTTAGCTTCCCTCAAATCACTCTTTGGCAACGACCCCTCGTCACAATAAAGATAGGGGGGCAGCTAAAGGAAGCTCTATTAGATACAGGAGCAGATGATACAGTATTAGAAGAAATGAATTTGCCAGGAAGATGGAAACCAAAAATGATAGGGGGAATTGGAGGTTTTATCAAAGTAAGACAGTATGATCAGATACTTATAGAAATTTGTGGACATAAAGCTATAGGTACAGTATTAATAGGACCTACACCTGTCAACATAATTGGAAGAAATCTGTTGACCCAGATTGGTTGCACTTTAAACTTTCCCATTAGTCCTATTGAAACTGTACCAGTAAAATTAAAGCCAGGAATGGATGGCCCAAAAGTTAAACAATGGCCATTGACAGAAGAAAAAATAAAAGCATTAGTAGAAATTTGTACAGAAATGGAAAAGGAAGGAAAAATTTCAAAAATTAGGCCTGAAAATCCGTACAATACTCCAATATTTGCCATAAAGAAAAAGGACAGTACTAAATGGAGAAAATTAGTAGATTTCAGAGAACTTAATAAGAGAACTCAAGACTTCTGGGAAGTTCAATTAGGAATACCACATCCCGCAGGATTAAAAAAGAAAAAATCAGTAACAGTACTGGATGTAGGTGATGCATATTTTTCAGTTCCCTTAGATAAAGACTTCAGAAAGTATACTGCATTTACCATACCTAGTATAAACAATGAGACACCAGGAATTAGATATCAGTATAATGTGCTGCCGCAGGGATGGAAAGGATCACCAGCAATATTCCAAAGTAGTATGACAAAAATCTTAGAGCCTTTTAGAAAACAAAATCCAGACATAGTTATCTATCAATACATGGATGATTTGTATGTAGGATCTGACTTAGAAATAGGGCAGCATAGAACAAAAATAGAGGAACTGAGAGAACATCTGTTGAAGTGGGGATTTACCACACCAGACAAAAAACATCAGAAAGAACCTCCATTCTTGTGGATGGGGTATGAACTCCATCCTGATAAATGGACAGTACAGCCTATAGAGCTGCCAGAAAAAGACAGCTGGACTGTCAATGACATACAGAAGTTAGTAGGAAAATTAAATTGGGCAAGTCAGATTTATCCAGGGATTAAAGTAAAGCAATTATGTAAACTTCTTAGGGGAACCAAAGCACTAACAGAAGTAGTACCACTAACAGAAGAAGCAGAGCTAGAACTGGCAGAAAACAGGGAGATTCTAAAAGAACCAGTACATGGAGCATATTATGACCCAACAAAAAACTTAATAGCAGAAATACAGAAGCAAGGGCAAGGCCAATGGACATATCAAATTTATCAAGAGCCATTTAAAAATCTGAAAACAGGAAAGTATGCAAGAGCAAGGGGTGCCCACACTAATGATGTAAAACAATTAACAGAGGCAGTGCAAAAAATAGCCACAGAAAGCATAGTGATATGGGGAAAGACTCCTAAATTTAAACTACCCATACAAAAAGAAACATGGGAATCATGGTGGACAGAGTATTGGCAGGCCACCTGGATTCCTGAGTGGGAGTTTGTCAATACCCCTCCCTTAGTAAAATTATGGTATCAGTTAGAGAAAGAACCAATAGTGGGAGCGGAAACTTTCTATGTAGATGGGGCATCCAACAGGGAAACTAAATTAGGAAAAGCAGGATATGTTACTGACAGAGGAAGACAAAAGGTTGTCCCCTTAAATGACACAACAAATCAGAAGACTGAATTACAAGCAATTTATCTAGCTTTGCAGGATTCGGGATTAGAAGTAAACATAGTAACAGACTCACAATATGCATTAGGAATCATTCAAGCACAACCAGATAAAAGTGAATCAGAGTTAGTTAGTCAAATAATAGAGCAGCTAATAAAAAAGGAAAAGGTCTACCTGGCATGGGTCCCAGCACACAAAGGAATTGGAGGAAATGAACAAGTAGATAAATTAGTCAGTGCTGGAATCAGGAAAGTACTATTTTTAGATGGGATAGATAAGGCCCAAGAAGATCATGAAAAATATCATAGCAATTGGAGAGCAATGGCTAGTGATTTTAATCTGCCACCTGTAGTAGCAAAAGAGATAGTAGCTAGCTGTGATAAATGTCAGCTAAAAGGAGAAGCCATGCATGGACAAGTAGACTGTAGTCCAGGAATATGGCAACTGGATTGTACACATTTAGAAAGGAAAGTTATCCTGGTAGCAGTTCATGTAGCCAGTGGATATATAGAAGCAGAAGTTATTCCAGCAGAGACAGGRCAAGAAACAGCATACTTTCTCCTAAAACTAGCAGGAAGATGGCCAGTAAGAACAGTACATACAGACAATGGCAGCAATTTTACCAGTACTGTAGTGAAGGCCGCCTGTTGGTGGGCAGAGATCAAGCAGGAATTTGGCATTCCCTACAATCCTCAAAGTCAAGGAGTAGTAGAATCTATGAATAAAGAATTAAAGAAAATTATAGGACAGGTAAGAGATCAGGCTGAACATCTTAAGACAGCAGTACAAATGGCAGTATTCATCCACAATTTTAAGAAAAGAGGGGGGATTGGGGGGTACAGTGCAGGGGAAAGAATAGTAGACATAATAGCAACAGACATACAAACTAAAGAACTACAAAAACAAATTACAAAAATTCAAAATTTTCGGGTTTATTTCAGGGACAGCAGAGATCCAGTTTGGAAAGGACCAGCAAAGCTTCTTTGGAAAGGTGAAGGGGCAGTAGTAATACAAGAAAATAGTGACATAAAAGTAGTGCCAAGAAGAAAAGCAAAGATCATTAGGGATTATGGAAAACAGATGGCAGGCGATGATTGTGTGGCAAGTAGACAGGATGAAGATTAGAACATGGAACAGTTTAGTAAAACACCATATACATATTTCAAAGAAAGCTAACAAATGGGTTTATAGACATCACTATGAAAGCACTAATCCAAGAATAAGTTCAGAAGTACACATCCCACTAGGGGATGATAAATTGGTAGTAACAACATATTGGGGTCTGCATACAGGAGAAAGGGACTGGCACTTGGGTCACGGAGTCTCCATAGAATGGAGAAAAGGGAAATATAGCACACAAGTAGACCCTGGCCTAGCAGACCAACTAATTCACCTGTATTACTTTGATTGTTTTTCAGAATCTGCTATAAGAAAAGCCATATTAGGATATAGAGTTAGCCCTAGGTGTGATTATCAAGCAGGACATAACAAGGTAGGATCTCTACAGTACTTGGCACTAGCAGCATTAATAACACCAAAAAGGACAAAGCCACCTTTGCCTAGTGTTACGAAGCTGACAGAGGATAGATGGAACAAGCCCCAGAGAACCAAGGGCCGCAGAGGGAGCCATACAATGAGTGGACACTAGAACTTTTAGAAGAGCTTAAGAATGAAGCTGTCAGACATTTTCCTAGTACATGGCTCCATGGCTTGGGACAATATATCTATGAAACTTATGAGGACACTTGGACAGGAGTGGGAGCCTTAATAAGAACTCTGCAACAACTGCTGTTTATTCATTTCAGAATTGGGTGTCGACATAGCAGAATAGGCATCCAGATTCAACAGAGGAGAGCAAGGAATGGAGCCAGTAGATCCTAGACTAGAGCCCTGGAAGCATCCAGGAAGTCAGCCTCAGACTCCTTGTACCTCTTGCTATTGTAAAAAGTGTTGCTTTCATTGTCAAGTTTGCTTCATAAACAAAGGCTTAGGCATCTCCTATGGCAGGAAGAAGCGGAGACAGCGACGAAGAGCTCCTCAAGACAGTCAGACTCATCAGGTTTCTCTATCAAAGCAGTAAGTAGTACATGTAATGCAATCTTTACATATATTAGCAATAGTGGCATTAGTAGTAGCAGTAATAATAGCAATAGTTGTGTGGTCCATAGTATTCATAGAATATAGGAAAATATTAAGACAAAGAAGAATAGACAGGTTAATTGATAGAATAAGAGAGAGAGCAGAAGACAGTGGCAATGAAAGTGAAGGGGATCAGGAGGAACTACTGGTGGAAATAGGGCACCTTGCTCCTTAAGATATTGATGATCTGTAGTGCTACAGACAAATTGTRGGTCACAGTCTACTATGGGGTACCGGTGTGGAAAGAAGCAAACACCACTCTATTTTGTGCATCAGATGCTAAAGCATATAGTACAGAGAAACATAATGTTTGGGCTACACATGCTTGTGTACCCACAGACCCCAACCCACAAGAAGTAGTATTGGAAAATGTGACAGAAAATTTTAATATGTGGAAAAATAATATGGTAGAACAGATGCATGAGGATATAATCAGTTTATGGGATCAAAGCCTAAAGCCATGTGTAAAACTAACCCCACTCTGTGTTACTTTAAATTGCACTGATTATCATGGGAATAATGCCAATACCACTAGTATTACTAATACCAATAGTACTAATAATGCCACTGTGATGGGGAGCGAAATAAAAAACTGCTCTTTTTATATCACCACAAGCCTAAGAGATAAGACAAAGAAAGAAAATGCACTTTTTTATAACCTTGATATAGAACCAATAGATAATATTACCTATAGGTTGATAAGTTGTAACACCTCAGTCATTACACAGGCCTGTCCCAAGGTAACCTTTGAGCCAATTCCCATACACTATTGTGCCCCGGCTGGTTTTGCGATTCTAAAGTGTAACAACAAGGAGTTCAATGGAACAGGACCGTGTACAAATGTCAGCACAGTACAATGTACACATGGAATTAGGCCAGTAGTATCAACTCAACTGCTGTTAAATGGTAGTCTAGCAGAAGACAACCTAGTAATTAGATCTGAAAATTTCACGAACAATGCAAAAACCATACTAGTGCAGCTGAATGACTCTGTAGAAATTAATTGTACAAGACCCAACAACAATACGAGAAAAAGTATACATATAGGACCAGGGAGAGCATTTTATGCAACAGGAAGTATAATAGGAGACATAAGGCAAGCACATTGTAACATTAGTGGAGCAAAATGGAATAACACTTTAAAACAGATAGCTACAAAATTAGGAGAAATATTTAAAAATAAAACAATAGCCTTTACTCACTCCTCAGGAGGGGACCCAGAAATTGTAATGCACAGTTTTAATTGTGGAGGGGAGTTTTTCTACTGTAATTCAACACAATTGTTTAATAGTACTTGGTGGAGTAATGGTACTCAGTGGAAAGGAAATAGCACACTCCCAGAAAATGTTACACTCCCATGCAGAATAAAACAATTTGTAAACATGTGGCAGGAAGTAGGAAAAGCAATGTATGCCCCTCCCATCAGCGGACAAATTAGATGCTCATCAAATATTACAGGGCTGCTATTAACAAGAGATGGTGGTGCCAATGGTACCACTGATATAGACGAGATCTTCAGGCCTGGAGGAGGAGATATGAGGGACAATTGGAGAAGTGAATTATATAAATATAAAGTAGTAAAAATTGAACCATTAGGAATAGCACCCACCAAGGCAAAGAGAAAAGTGGTGCAAAGAGAAAAAAGAGCAGTGGGACTAGGAGCTTTGTTCCTTAGGTTCTTAGGAGCAGCAGGAAGCACTATGGGCGCAGCGTCAGTGACGCTGACGGTACAGGCCAGACAATTATTGTCTGGTATAGTGCAACAGCAGAACAATCTGCTGAGAGCTATTGATGCGCAACAGCATCTGTTGCAACTCACAGTCTGGGGCATTAAGCAGCTCCAGGCGAGAATCCTGGCTATGGAAAGATACCTAAAGGATCAACAGCTCCTGGGGATATGRGGATGCTCTAGAAAACTCATTTGCACCACTAATGTGCCTTGGAATACTAGTTGGAGTAATAAATCTCTAAATGAGATTTGGGACAACATGACCTGGATGGATTGGGAAAGACAAATTGACAATTACACAGGCATAATATACACCTTACTTGAGGAATCGCAAAACCAACAAGAAAAGAATGAACAAGAATTATTGGAATTAGATAAATGGGCAAGTTTGTGGAATTGGTTCAGTATAACAAATTGGCTGTGGTATATAAAACTATTCATAATGATAGTAGGAGGCTTGGTAGGTTTAAGAATAATTTTTACTGTACTTTCCATAGTGAATAGAGTTAGGCAGGGATATTCACCAATATCGTTGCAGACCCACCGCCCAGCTCCGAGGGGACCCGACAGGCCCGAAGGAACCGAAGAAGAAGGTGGAGAGCGAGACAGAGACAGATCAAGTCCATTAGTGACTGGATTATTAGAACTCATCTGGGTCGACCTACGGAACCTGTGCCTTTTCAGTTACCGCCACTTGAGAGACTTACTCTTGATTGCAGCGAGGATTGTGGAACTTCTGAGGACCAGGGGGTGGGAACTCCTCAAATATTGGTGGAATCTCCTACAGTATTGGAGTCAGGAACTAAAGAATAGTGCTATCAGCTTGTTCAACGCCACAGCAATAGCAGTAGCTGAGAAGACAGATAAAGTTATAGAAATATTGCAAAGGGCTGGTAGAGCTTTCCTTCACATACCTAGAAGAATAAGACAAGGCTTCGAAAGGAGTTTGCTATAAGATAGGTGGCAAATGGTCAAAATTGAGTAGATGGCCTGCTGTAAAGGAAAGAATAAGAAGAACTGAGCCAGCAGCAGATAAGGTAGGAGCAGCTTCTCGAGACCTAGAAGAACGTGGAGCATTAACAACTAGCAATACAGCACATAATAATGCAGCTTGTGCCTGGGTAGAAGCACAAGAGGAGGAAGAAGTAGGTTTTCCAGTCACGCCTCAGGTACCTTTAAGACCAATGACTTACAAGGCAGCTGTAGATCTTAGCCACTTTTTAAAAGAAAAGGGGGGACTGGAAGGGATGGTATGGTCTCAAAAGAAACAAGACATCCTTGACCTGTGGATCTACCACACACAAGGCTACTTCCCTGATTGGCAGAACTACACACCAGGGCCAGGGCCCAGATATCCACTGACCTTTGGATGGTGCTTCAAGCTAGTACCACTTGATCCAGACCAGGTAGAAAAGGCCAACGAAGGAGAGAACAACAGCTTGTTACACCCTATATGCCAGCATAGGATAGATGACCCGGAGAAAGAAACATTAGTATGGAGGTTTGACAGCCGCCTAGCATGTCATCATGTAGCCAAAGTGCTGCATCCGGAGTATTACAAAGACTGGACTGCTGACACTGAACTTTCTACAAAGGACTTTCCGTTAAGGACTTTCCAGGGAAGTGTGGCCTGGGCGGGACCGGAGAGTGGCAAGCCCTCAGATGCTGCATATAAGCAGCTGCTTTCTGCCTGTACTAGGTCTCTCTGGTTAGACCAGATCTGAGCCTAGGAGCTCTCTGGCTAGCTAGGGAACCCACTGCT
>B.US.98.1058_11_AY331295_K.CM.96.MP535_AJ249239
GCGTCAGTATTAAGCGGGGGAAAATTAGATACATGGGAGAAAATTCGGTTAAGGCCAGGGGGAAAGAAAAAATATAAATTAAAACATATAGTATGGGCAAGCAGGGAGCTAGAACGATTTGCACTTAACCCTGGCCTGTTAGAAACAGCAGAAGGCTGTAGACAATTATTGGGACAGCTACAGCCATCCCTTCAAACAGGATCAGAAGAACTTAAATCATTATTTAATACAATAGCAACCCTCTATTGTGTACATCAAAGGATAGAGGTAAGAGACACCAAAGAGGCTTTAGACAAGATAGAGGAAGAGCAAAACAAAAGTAAGAAAAAAGCACAGCAAGCAGCAGCTGCAGCTGACACAGGAAACAGCAGCCAGGTCAGCCAAAATTACCCTATAGTGCAGAACCTCCAAGGGCAAATGGTACATCAGGCCATATCACCTAGAACTTTAAATGCATGGGTAAAAGTAATAGAAGAGAAGGCTTTTAGCCCAGAAGTAATACCCATGTTTGCAGCATTATCAGAAGGAGCCACCCCACAAGATTTAAACACCATGCTAAACACAGTGGGGGGACATCAAGCAGCCATGCAAATGTTAAAAGAAACCATCAATGAGGAAGCTGCAGAATGGGATAGAATACATCCAGCGCAAGCAGGGCCTATAGCACCAGGCCAGATAAGAGACCCAAGGGGAAGTGACATAGCAGGAACTACTAGTACCCTTCAGGAACAAATAACATGGATGACAAATAATCCACCTATCCCAGTAGGAGAAATCTATAAAAAATGGATAATCATGGGATTAAATAAAATAGTAAGGATGTATAGTCCTACCAGCATTCTGGACATAAGACAAGGACCAAAGGAACCCTTTAGGGACTATGTAGACCGGTTCTATAAAACTCTAAGAGCCGAGCAAGCTTCACAGGAGGTAAAAAATTGGATGACAGAAACCTTGTTGGTCCAAAACGCGAACCCAGATTGTAAGACTATATTAAAAGCATTAGGACCAGCAGCTACACTAGAGGAAATGATGACAGCATGTCAGGGAGTGGGAGGACCTGGCCATAAAGCAAGAGTTTTGGCTGAAGCAATGAGCCAAGTAACAAATTCAGGTGCCATAATGATGCAGAAAGGCAATTTTAGGAACCAGGTTGTTAGGTGTTTCAATTGTGGCAAAGTAGGGCACATAGCCAAAAATTGCAGGGCCCCTAGGAAGAAGGGCTGTTGGAAATGTGGAAAAGAAGGACACCAAATGAAAGATTGTGATCAGAGACAGGCTAATTTTTTAGGGAAGATCTGGCCTTCCCACAAAGGAAGGCCAGGGAATTTTCTTCAGAGCAGACCAGAGCCAACAGCCCCACCAGCAGAGAGCTTCAGGTTTGGGGAGGAGACAACAACTCCCTCTCAGAAGCAGGAGCCACAAGAATATCCTTTAGCTTCCCTCAGATCACTCTTTGGCAACGACCCCTCGTCACAATAAAGATAGGGGGGCAGCTAAAGGAAGCTCTATTAGATACAGGAGCAGATGATACAGTATTAGAAGAAATGAATTTGCCCGGAAGATGGAAACCAAAAATGATAGGGGGAATTGGAGGTTTTATCAAAGTAAGACAGTATGATCAGATACCCATAGAAATTTGTGGAAATAAAGCTATAGGTACAGTGTTAATAGGACCTACACCTGTCAACATAATTGGACGAAACCTGTTGACTCAGATTGGTTGTACTTTAAATTTTCCAATTAGTCCTATTGAAACTGTACCAGTAAAATTAAAGCCAGGAATGGATGGTCCAAAAGTTAAACAATGGCCATTAACAGAAGAAAAAATAAAAGCATTAGCAGAAATTTGTGCAGAAATGGAAAAGGAAGGGAAAATTTCAAAAATTGGGCCTGAAAATCCATACAATACTCCAGTATTTGCTATAAAAAAGAAAGACAGTACTAAATGGAGAAAGTTAGTAGATTTTAGAGAACTTAATAAGAAAACTCAAGACTTCTGGGAAGTTCAATTAGGAATACCACATCCCGCAGGGTTAAAAAAGAAAAAATCAGTAACAGTACTGGATGTGGGTGATGCATATTTCTCAGTTCCCTTAGATAGAGAATTCAGAAAGTATACTGCATTTACCATACCTAGTGTAAACAACGAGACACCAGGGATTAGATATCAGTATAATGTGCTTCCACAGGGATGGAAAGGATCACCAGCAATATTCCAAAGTAGCATGACAAAAATCTTAGAGCCTTTTAGAAAACAAAATCCAGAAATAGTTATCTATCAATACGTGGATGATTTGTATGTAGGATCTGACTTAGAAATAGGGCAGCATAGAACAAAAATAGAGGAACTGAGACAACATCTGTTGAAGTGGGGATTTACCACACCAGACAAAAAACATCAGAAAGAACCTCCATTCCTTTGGATGGGGTATGAACTCCATCCTGATAAATGGACAGTACAGCCTATAGTGCTGCCAGAGAAAGACACCTGGACTGTCAATGACATACAGAAGTTAGTGGGAAAATTGAATTGGGCAAGTCAGATTTATGCAGGGATTAAAGTAAGGCACTTATGTAAACTCCTTAGGGGAACCAAAGCACTAACAGAAGTAATACCTCTAACAGAAGAAGCAGAATTAGAATTGGCAGAAAACAGGGAGATTCTAAAAGAACCAGTACATGGAGTGTATTATGACCCATCAAAAGACTTAATAGCAGAAATACAGAAGCAGGGGCAAGGCCAATGGACATATCAAATTTATCAAGAGCCATTTAAAAATCTAAAGACAGGAAAATATGCAAGAATGAGGGGTGCCCACACTAATGATGTAAAACAATTAACAGAGGCAGTGCAAAAAATAGCCACAGAAAGCATAGTAATATGGGGCAAGACTCCTAAATTTAGACTACCCATACAAAAGGAAACATGGGAATCATGGTGGACAGATTATTGGCAAGCCACCTGGATTCCTGAGTGGGAATTTGTCAATACCCCTCCCTTAGTGAAATTATGGTACCAGTTAGAGAAAGAACCCATAGTAGGAGCAGAAACCTTCTACGTAGATGGGGCAGCTAACAGGGAGACTAAACTAGGAAAAGCAGGATATGTTACCGACAGAGGAAGACAAAAGGTTGTCTCCCTGACTGACACAACAAATCAGAAGACTGAGTTACAAGCAATTCATCTAGCACTGCAGGATTCAGGATTAGAAGTAAACATAGTAACAGACTCACAATATGCATTAGGAATCATTCAAGCACAACCAGATAAAAGTGAATCAGAGTTAGTCAGTCAAATAATAGAGGAGTTAATAAAAAAGGAAAAGGTCTACCTGACATGGGTACCAGCACACAAAGGAATTGGGGGAAATGAAAAAGTAGATAAATTAGTCAGTGCTGGGATCAGGAAAGTACTATTTTTAGATGGAATAGATAAGGCCCAGGAAGAACATGAAAAATATCACAATAATTGGAAAGCAATGGCTAGTGATTTTAACCTGCCACCTATAGTAGCAAAAGAAATAGTAGCCAGCTGTGATAAATGTCAGCTAAAAGGGGAAGCCATGCATGGACAAGTAGACTGTAGTCCAGGAATATGGCAACTAGATTGTACACATTTAGAAGGAAGAGTTATCCTGGTAGCAGTTCATGTAGCCAGTGGGTATATAGAAGCAGAAGTGATCCCAGCAGAGACAGGGCAGGAAACAGCATACTTTCTCTTAAAATTAGCAGGAAGATGGCCAGTAAAGACAATACATACAGACAATGGCAGCAACTTCACCAGTAGTGCGGTCAAGGCCGCCTGTTGGTGGGCGGGGGTCAAGCAGGAATTTGGCATTCCCTACAATCCCCAAAGTCAAGGAGTAGTAGAATCTATGAATAAAGAATTAAAGAAAATTATAGGACAGGTAAGAGATCAGGCTGAACATCTTAAGACAGCAGTACAAATGGCAGTATTCATCCACAATTTTAAAAGAAGAGGGGGGATTGGGGACTATAGTGCAGGGGAGAGAATAATAGACATAATAGCAACAGACATACAAACCAAAGAATTACAAAAACAAATTACAAAAATTCAAAATTTTCGGGTCTATTACAGGGACAGCAGAGATCCACTTTGGAAAGGACCAGCAAAGCTCCTCTGGAAAGGTGAAGGGGCAGTAGTAATACAAGATAAGAGTGACATAAAAGTAGTACCAAGAAGAAAAGTAAAGATCATTAGGGATTATGGAAAACAGATGGCAGGTGATGATTGTATGGCAAGTAGACAGGATGAGGATTAGAACATGGAAAAGTTTAGTGAAACACCATATGTATATATCAAGGAAAGCTAAGGACTGGTTTTATAGACATCACTATGAAAGCACTCATCCAAAAATAAGTTCAGAAGTACACATCCCACTAGAGGATGCTGAATTGGTAGTAACAACATATTGGGGTCTGCATACAGGAGAAAGAGAATGGCATTTGGGTCAGGGAGTCTCCATAGAATGGAGGAAAAAGAGATATAGCACACAAGTAGACCCTGACCTAGCAGACCAACTAATTCATCTGTATTACTTTGAATGTTTTTCAGACTCTGCCATAAGAAATGCCCTGTTAGGACATAGAATTAGACATAGGTGTGAATATCAAGCAGGACATAACAAGGTAGGATCTTTACAGTACTTGGCACTAACAGCATTAATAAAACCAAAAAGGAGAAAGCCACCTTTGCCTAGTGTTGCGAAACTGACGGAGGACAGATGGAACAAGTCCCAGCAGACCAAGGGCCACAGAGGGAGCCATACAATGAATGGACACTAGAACTTTTAGAGGAGCTTAAGAATGAAGCTGTGAGACACTTTCCCAGGATATGGCTTCACAACTTAGGACAACATATCTATGAAACTTATGGGGATACTTGGGTAGGAGTGGAAGCCATAATAAGAATACTGCAACAACTGCTGTTTATCCATTTCAGAATTGGATGTCAACATAGCAGAATAGGCATTATTCGACAGAGGAGAGCAAGAAATGGATCCAGTAGACCCTAAACTAGAGCCCTGGAAGCATCCAGGAAGTCAGCCTAGGACTGCTTGTACCAATTGCTATTGTAAAAAGTGTTGCTTTCATTGCCAAGTTTGCTTCATAACAAAAGGCTTAGGCATCTCCTATGGCAGGAAGAAGCGGAGACAGAGACGAAGAGCTCCTCCAGACAGTCAGATTGATCAAGCTTCTCTACCAAAGCAGTGAGTAGTACCTGTAATGCCATCTTTATATATCTTAGGAATAGTAGCATTAGTAGTAGCAGCAATACTAGCAATAGTTGTGTGGTCCATAGTGTTAATAGAATATAGGAAAATATTAAAACAAAAGAAAATAGACAAGATAATTGATAGGATAAGAGAAAGAGCAGAAGATAGTGGCAATGAGAGTGAAGGGGATCAGGAGGAATTGTCAGCACTCGTGGAGATGGGGCACTACGCTCACCATGCTCCTTGGAATATTGATGATCTGTAGAGCTGCAGAACAGTTGTGGGTCACAGTCTACTATGGGGTACCTGTGTGGAGAGAAGCAAAAACCACTCTATTTTGTGCGTCAGATGCTAAAGCATATGATACAGAAGTACATAATGTTTGGGCCACACATGCCTGTGTACCCACAGACCCCAACCCACAAGAACTAGTATTGGTAAATGTGACAGAAAACTTTAATGCATGGGAAAATAACATGGTAGAACAAATGCATGAGGATATAATCAGTTTATGGGATCAAAGCCTAAAGCCATGTGTAAAATTAACCCCACTCTGTGTTACTTTAAATTGCAATGATTTAAATACCACCACTAGTAATACCACTGGTACTGAAGGGTTAACAATGGATAAAGGAGAAATGAAAAACTGCTCTTTCAATATCACCACAGACATAAGCAATAAGAAGCAGAAACAGTATGCACTTTTTTATAAACTTGATGTAGTACAAATGAATAATAATAATAATAGCTATAGGCTGATAAGTTGTAACACCTCAGTCATTACACAGGCCTGTCCAAAGGTATCCTTTGAGCCAATTCCCATATATTATTGTGCCCCAGCTGGGTTTGCGATTCTAAAATGTAATGATAAATCGTTCAGTGGAAAAGGAGAATGTAAAAATGTCAGCACAGTGCAATGTACACATGGAATTAGGCCAGTAGTATCTACTCAATTGCTGTTAAATGGCAGTCTAGCAGAAGAAGATGTAATAATCAGATCTGACAATTTCACGGACAATGCTAAAACCATAATAGTACAACTGAACGAAACTGTAGATATTCACTGTATAAGGCCCAACAATAATACAAGAAAACGTATAACTATGGGACCAGGGAAAGTATATTATACAACAGGACAAATAATAGGAGATATAAGACAAGCACATTGTAACCTTAGTGAAGCAAAATGGAATAACACTTTAAGAAGGGTAGTTAGAAAATTAAGAGAAAAATTTAATAAAACAATAGTCTTTAATCAATCCTCAGGAGGAGACCCAGAAATTGTAATGCACACTTTTAATTGTGGAGGGGAATTTTTCTATTGCAACTCAACCAAACTATTTAATAGCATTTGGGATAATAATAAAGATAGCACTAAAACAAATGAACCAAATGATGGAAAAAATATCACACTCCCATGCAGAATAAAACAAATTATAAACATGTGGCAGGGAGTAGGAAAAGCAATGTATGCCCCTCCCATCAGAGGACAAATTAGATGTACATCAAATATTACAGGGCTACTATTAACAAGAGATGGTGGCAAGAACAATGGCACTAATGGGACCGAGGTCTTCAGACCTGGAGGAGGAAATATGAAGGACAATTGGAGAAGTGAATTATATAAATATAAAGTAGTAAAAATTGAACCATTAGGAGTAGCACCCACCACGGCAAAGAGACGAGTGGTGCAGAGAGAAAAAAGAGCAGTGACACTAGGAGCTCTGTTCCTTGGGTTCTTGGGAGCAGCAGGAAGCACTATGGGCGCAGCGTCAATGACGCTGACGGTACAGGCCAGACTATTATTGTCTGGTATAGTGCAACAGCAGAACAACTTGCTGAGGGCTATTGAGGCGCAACAACATCTGTTGCAACTCACGGTCTGGGGCATCAAGCAGCTCCAGGCAAGAGTCCTGGCTGTGGAAAGATACCTAGAGGATCAACAGCTCCTGGGGATTTGGGGTTGCTCTGGAAAACTCATCTGCACCACTGCTGTGCCTTGGAATGCTAGTTGGAGTAATAAATCTAGGAGTGAGATTTGGAATAACATGACCTGGATGCAATGGGACAAAGAAATTCATAATTACACAAACTTAATATACACCTTAATTGGAGAATCGCAAATCCAGCAAGAAAAAAATGAACAAGAACTATTGGGATTAGATAAATGGGCAAGTTTGTGGAATTGGTTTGACATAACAAAATGGCTGTGGTATATAAAAATATTCATAATGATAGTAGGAGGCTTGATAGGTTTAAGAATAGTTTTTACTGTACTTTCTATAATGAATAGAGTTAGGCAGGGATACTCACCATTATCATTTCAGACCCGCCTCCCAACCCAGAGGGGACCCGACAGGCCCGAAGGAACAGAAGAAGAAGGTGGAGAGAGAGACAGAGACAGATCCGGACCATTAGTGGATGGATTCTTAGCAATCATCTGGGTCGATCTACGGAGCCTGTGTCTCTTCCTCTACCACCGATTGAGAGACTTACTCTTGATTGTGACGAGGACTCTGGAACTTCTGGGACGCAGGGGGTGGGAGATCCTCAAATATTGGTGGAATCTCCTACAGTATTGGAGTCAGGAACTAAAGAATAGTGCTGTTAGCTTGCTCAACGCCACAGCCATAGCAGTAGCTGAGGGGACAGATAGGGTTATAGAAATAGTACAAAGAACTTTTAGAGCTATCCTCCACATACCTGTAAGAATAAGACAGGGCTTGGAAAGGGCTTTGCTATAAGATGGGTGGCAAGTGGTCAAAACGTAGTATTGTGGGATGGCCTACAATAAGAGAAAGAATGAGACGAGCCGCACCAGCAACTGAGCCAGCAGCAGAAGGGGTGGGAGCAGCATCTCGAGACCTGGAAAGACATGGAGCACTCACAAGTAGCAATACAGCAGCTAACAATGCTGCTTGTGCCTGGCTAGAAGCACAAGAGGATGAGGAGGTGGGTTTTCCAGTCAGACCTCAGGTGCCTTTAAGACCAATGACTTACAAGGCAGCTGTAGATCTTAGCCACTTTTTAAAAGAAAAGGGGGGACTGGAAGGGCTAATTTACTCCCAGCAAAGACAGGATATCCTTGATCTGTGGGTCTACCACACACAAGGCTACTTCCCTGATTGGCAGAATTACACACCAGGGCCAGGGACCAGATATCCCCTGACCTTTGGATGGTGCTTTAAGCTAGTACCAGTTGAACCAGAGAAGATAGAAGAGGCCACTGAAGGAGAAAACAACTGCTTGTTACACCCGATAAACCAGCATGGGATGGACGACCCGGAGAGAGAAGTGTTAGTGTGGAGGTTTGACAGTCGCMTAGCACTCCGTCACGTGGCCCGAGAGATGCATCCGGAGTACTACAAGGACTGCTGACATCGAGATTTCTACAAGGGACTTTCCACTGGGGACTTTCCGGGGAGGCGTGGCCTGGGCGGGACTGGGGAGTGGCGAGCCCTCAGATGCTGCATATAAGCAGCTGCTTTTTGCCTGTACTGGGTCTCTCTRGYTAGACCAGATCTGAGCCTGGGAGCTCTCTGGCTAACTAGGGAACCCACTGCTTAAGCCTCAATAAAGCTTGCCTTGAGTGCA
>C.ZA.04.04ZASK128B1_DQ093586_D.UG.93.93UG_065_AY713418
TCTGTTGTTTGACTCTGGTATCTAGAGATCCCTCAGACCAATTTTGGTAGTGTGGAAAATCTCTAGCAGTGGCGCCCGAACAGGGACCCGAAAGCGAAAGTAAGACCAGAGGAGATCTCTCGACGCAGGACTCGGCTTGCTGAAGTGCACTCGGCAAGAGGCGAGAGCGGCGGCTGGTGAGTACGCCAAATTTTATTTGACTAGCGGAGGCTAGGAGGAGAGAGATGGGTGCGAGAGCGTCAGTATTAAGAGGCGAAAAATTAGATCAATGGGAAAAAATTAGGTTAAGGCCAGGGGGGAAGAAAAGATATATGCTAAAACACCTAGTATGGGCAAGCAGGGAGCTGGAAAGATTTGCACTTAACCCTGGCCTTTTAGAGACATCAGAAGGCTGTAGACAAATAATAAAACAGCTACAACCAGCTCTTCAGACAGGGACAGAGGAACTTAAATCATTATATAACACAGTGGCAACTCTCTATTGTGTACATGAAGAGATAAGGGTACGAGACACCAAGGAAGCCCTAGACAAGATAGAGGAAGAGCAAAACAAAAGTCAGCAAAAAACACAACAAGCAAAAGCTGATGATGGGAAAGTTAGTCAAAATTACCCTATAGTGCAGAATCTCCAAGGGCAAATGGTACACCAGGCCATATCACCTAGAACTTTGAATGCATGGGTAAAAGTGATAGAGGAGAAGGCCTTTAGCCCAGAGGTAATACCCATGTTTTCAGCATTATCAGAAGGAGCCACCCCGACAGATTTAAACACCATGTTAAATACAGTGGGGGGACACCAAGCAGCCATGCAGATGTTAAAAGATACCATCAATGAGGAGGCTGCAGAATGGGATAGATTACATCCAGTACATGCAGGGCCTATTGCACCAGGCCAAATGAGGGAACCTAGGGGAAGTGACATAGCAGGAACTACTAGTACCCTTCAGGAACAAATAGGCTGGATGACAAGTAACCCACCTATCCCAGTGGGAGACATCTATAAAAGATGGATAATTCTGGGGTTAAATAAAATAGTAAGAATGTATAGCCCTGTCAGCATTTTGGACATAAAACAAGGGCCAAAGGAACCCTTTAGAGACTATGTAGACCGGTTCTTTAAAGTTTTAAGAGCTGAACAAGCTACACAAGATGTAAAAAATTGGATGACAGACACCTTGTTGGTCCAAAATGCGAACCCAGATTGTAAGACCATTTTAAGGGCATTAGGACCAGCAGCTTCATTAGAAGAAATGATGACAGCATGTCAGGGAGTGGGAGGACCTAGCCACAAAGCAAGAGTGTTGGCCGAGGCAATGAGCCAAACACACAGTAACATAATGATGCAGAGAAACAATTTTAAGGGAGCTAAAAGAATTGTTAAATGTTTCAACTGTGGCAAGGAAGGGCACATAGCCAGAAATTGTAGGGCCCCTAGAAAAAAGGGCTGTTGGAAATGTGGGAAAGAAGGACACCAAATGGAAGACTGTGATGAGAGGCAGGCTAATTTTTTAGGGAAAATTTGGCCTTCCCACAAGGGGAGGCCAGGGAATTTCCTTCAGAGCAGACCAGAGCCAACAGCCCCACCAGCAGAACCAACAGCCCCACCAGCAGAGAGCTTCCGGTTCGAGGAGACAACCCCCGCTCGGAAGCAGGAGTCGAAAGACAAGGAACTGTATCCTCTAACTTCCCTCAGATCACTCTTTGGCAACGACCCCTTGTCACAATAAAGATAGGGGGACAGCTAAAGGAAGCTCTATTAGACACAGGAGCAGATGATACAGTATTAGAAGAAATAAATTTGCCAGGAAAATGGAAACCAAAAATGATAGGAGGAATTGGAGGTTTTATCAAAGTAAGACAGTATGATCAAATACTTATAGAAATTTGTGGAAAAAAGGCTATAGGTACAGTGCTAGTAGGACCTACACCTATCAACATAATTGGAAGAAATATGTTGACTCAGCTTGGGTGCACATTAAATTTTCCAATTAGCCCCATTGAAACTGTACCAGTAAAATTAAAGCCAGGAATGGACGGCCCAAAGGTTAAACAATGGCCATTGACAGAAGAAAAAATAAAAGCATTAGCAGCAATTTGTGAAGAAATGGAGAAGGAAGGAAAAATTACAAAAATTGGGCCTGAAAATCCATATAACACTCCAATATTTGCCATAAAAAAGAAGGATAGTACTAAGTGGAGGAAATTAGTAGATTTCAGAGAACTCAATAAAAGAACTCAAGACTTTGGGAGGTTCAATTAGGAATACCACACCCAGCAGGGTTAAAAAAGAAAAAATCAGTGACAGTACTGGATGTGGGGGATGCATATTTTTCAGTTCCTTTAGATGAAGACTTCAGGAAATATACTGCATTTACCATACCTAGTATAAACAATGAAACACCAGGGATTAGATATCAATATAATGTGCTTCCACAGGGATGGAAAGGATCACCATCAATATTCCAGAGTAGCATGGTAAAAATCCTAGAGCCCTTTAGGGCACAAAATCCAGAGATAGTCATCTATCAATATATGGATGACTTATATGTAGGATCTGACTTAGAAATTGGGCAACATAGAGCAAAAATAGAGGAGTTAAGAGCACATCTCTTAAGGTGGGGATTCACCACACCAGATAAGAAACATCAAAAAGAACCCCCATTTCTTTGGATGGGGTATGAACTCCATCCTGACAAGTGGACAGTACAGCCCATAAAGCTGCCAGAAAAGGATAGCTGGACTGTCAATGATATACAAAAGTTAGTGGGAAAATTAAACTGGGCAAGTCAGATTTATGCAGGGATTAAGGTAAGGCAACTTTGTAAACTCCTTAGGGGGGCCAAAGCACTGACAGATATAGTACCACTAACTGAGGAAGCAGAATTGGAATTAGCAGAGAACAGGGAAATTTTAAAAGAACCAGTACATGGAGTATATTATGACCCATCAAAAGAATTGATAGCTGAAATACAGAAACAGGGGCAGGACCAATGGACATATCAAATTTACCAAGAACCATTCAAGAATCTAAAAACAGGGAAATATGCAAAAGGGAGGACGGCCCACACTAATGATGTAAAACAGCTAACAGAGGCAGTGCAAAAAATAGCCATGGAAAGCATAGTAATATGGGGAAAGACTCCTAAATTTAGACTACCCATCCAAAAGGAAACACGGGAGACATGGTGGACAGACTATTGGCAAGCCACCTGGATTCCTGAGTGGGAGTTTGTTAATACCCCTCCCCTAGCAAAATTATGGTATCAGCTGGAGAAAGATCCCATAGCAGGAGTAGAAACTTTCTATGTGGATGGAGCAGCTAACAGGGAAACTAAAATAGGGAAAGCAGGGTATGTTACTGACAAAGGAAGGCAGAAAGTTATTACTCTAACTGAAGCAACAAATCAGAAGACTGAATTACAAGCAATTCAGCTTGCTTTGCAAGATTCAGGATCAGAAGTAAACATAGTAACAGACTCGCAGTATGCATTAGGAATTATTCAAGCACAACCAGATAAGAGTGAATCAGAGTTAGTTAACCAGATAATAGAAGAGTTAATAAAAAAGGAAAGGGTTTACCTGTCCTGGGTACCAGCACATAAAGGAATTGGAGGAAATGAACAAGTAGATAAATTAGTAAGTAGTGGAATCAGGAAAGTACTGTTTCTAGATGGAATAGATAAAGCTCAAGAAGAGCACGAAAAGTATCACAGCAATTGGAGAGCAATGGCTAGTGAATTTAATCTACCACCCATAGTAGCAAAAGAAATAGTAGCTAGCTGTGATAAATGTCAGCAAAAAGGGGAAGCCATGCATGGACAGGTAGACTGTAGTCCAGGGATATGGCAATTAGATTGTACACACTTAGAAGGAAAAGTCATCATAGTAGCAGTCCATGTAGCCAGTGGCTACATAGAAGCAGAGGTTATCCCAGCAGAAACAGGACAAGAAACAGCATACTATATACTAAAATTAGCAGGAAGATGGCCAGTTAAAGTAATACACACAGACAATGGCAGTAATTTCACTAGTGCTGCAGTCAAGGCAGCCTGTTGGTGGGCAGGTATCCAACAAGAATTTGGAATTCCCTACAATCCCCAAAGTCAGGGAGTAGTAGAATCCATGAATAAAGAATTAAAGAAAATCATACAGCAGGTAAGAGATCAAGCTGAGCACCTTAAGACAGCAGTACAAATGGCAGTATTCATTCACAATTTTAAAAGAAAAGGGGGGATTGGGGGGTACAGTGCAGGGGAAAGAATAATAGATATAATAGCAACAGACATACAAACCAAAGAACTACAAAAACAAATTATAAAAATTCAAAATTTTCGGGTTTATTACAGAGACAGCAGAGACCCTATTTGGAAAGGACCAGCCAAACTACTCTGGAAGGGTGAAGGGGCAGTAGTAATACAAGATAATAGTGACATAAAGGTAGTGCCAAGAAGGAAAGCAAAAATCATCAGGGACTATGGAAAACAGATGGCAGGCGCTGATTGTGTGGCAGGTAGACAGGATGAGGATTAGAACATGGAATAGTTTAGTAAAGCACCACATGCATATTTCAAAAAGAGCTAAGAAATGGGTTTACAGACACCATTATGAAAGCAGACATCCAAGAGTAAGTTCGGAAGTACACATCCCATTAGGGGAAGCAAAATTAATAATAAAAACATATTGGGGTCTGCAAACAGGAGAAAGGGAATGGCATTTGGGTCATGGATGCTCCATAGAATGGAGATTGAGAAGATATAGCACACAAGTAGACCCTGGCCTGGCAGACCAGCTAATTCATATGCATTATTTTGATTGTTTTACAGACTCTGCCATAAGAAAAGCCTTATTAGGACAGATAATTATTCATAGGTGTGACTATCAAGCAGGACATAATAAGGTAGGATCTCTACAATACTTGGCACTGACAGCATTGATAAAACCAAAAAAGAGAAAGCCACCTCTACCTAGTGTTAGGAAATTAGCAGAAGATAGATGGAACAAGCCCCAGGAGACCAGGGACCGCAGAGGGAACCATACAATGAATGGACACTAGAGATTCTAGAGGAACTCAAGCAGGAAGCTGTCAGACATTTTCCTAGACCATGGCTCCATAACCTAGGACAATATATCTATGAAACATATGGGGACACTTGGACAGGAGTTGAAGCTATACTAAGAATACTGCAACAACTACTGTTTATTCATTTCAGAATTGGGTGCCAGCATAGCAGAATAGGCATCCTGCGACAGAGAAGAGCAAGAAATGGAGCCAGTAGATCCTAGCCTAGAGCCCTGGAACCATCCAGGAAGTCAGCCTAAAACTGCTTGCAATAGCTGTTATTGTAAACGATGTAGCTACCATTGTCTAGTTTGCTTTCAGACAAAAGGCTTAGGAATTTCCTATGGCAGGAAGAAGCGGAGACAGCGACGAAGCGCTCCTCCAAGCAGTGAAGATTCTCAAAATCTTATATCAAAGCAGTAAGTATTTGTAATGATAAATTTCTTAGTAAAAGTAGATTATAGAATAGGAGTAGGAGCATTTGTAATAGCACTAATCATAGCAATAGTTGTCTGGATCATAGCATATATAGAATATAGGAAATTGGTAAGACAGAGAAAAATAGACTGGTTAATAGAAAGAATTAGGGGAAGAGCAGAAGACAGTGGCAATGAGAGTGAGGGGGATACTGAGGAGTTGGCAACAATGGTGGATATGGGGCATCTTAGGCTTTTGGATGTTAATGATTTGTAATGTGGTGGGGAACTTGTGGGTCACAGTCTACTATGGGGTACCTGTGTGGAGAGAAGCAAAAACTACTCTATTCTGTGCATCAGATGCTAAAGCATATGAGAGGGAGGTGCATAATGTCTGGGCTACACATGCCTGTGTACCCACAGACCCCAACCCACTAGAAATGGTTTTGGAAAATGTAACAGAAAATTTTAACATGTGGAAAAATGACATGGTGGATCAGATGCATGAGGATATAATCAGTTTATGGGATCAAAGCCTAAAGCCATGTGTAAAGTTAACCCCACTCTGTGTCACTTTAGAATGTACTACAGTTAACGTTACCAATAATGGTAACAATAATGATAGTAAGATTATCAATGATGAGATGAAAAATTGCTCTTTCAATGCAACCACAGAAATAAGAGATAAGACTCGCAAAGAGTATGCACTTTTTTATAGACTTGATATAGTGCCACTTGATGGAAATGGGAACAACTCTAGTGGAAGTTATAGATTAATAAATTGTAATACCTCAACTGTAACACAAACTTGTCCAAAGGTCTCTTTTGATCCAATTCCTATACATTATTGTGCTCCAGCTGGATTTGCGATTCTAAAGTGTAATAATAAGACATTCAATGGGATAGGACCATGCCATAATGTCAGTACAGTACAATGTACACATGGAATTAAACCAGTGGTATCAACTCAATTACTGTTAAATGGTAGCATAGCAGAAGAAGAGATAATAATTAGATCTGAAAATCTGACGGACAATGCTAAAACAATAATAGTACAGCTTAATAGATCCATAGCAATTAATTGCACAAGACCCAACAATAACACAAGAAAAAGTATAAGGATAGGACCCGGACAAACATTTTATGCAACAAACGGAATAATAGGAGAAATAAGACAAGCACATTGTAACATTAGTAAAGAGGACTGGAATAGAACTTTACAAAATGTAAGTAAAAAATTAGAAGAACAATTCCCTAATAAAACAATAAGATTTCAACCATCCTCAGGAGGGGACCTAGAAATTACAATGCATAGCTTCAATTGTAGAGGAGAATTTTTCTATTGCAATACATCACAACTATTTAATAGTACATACTGGCTTAATGATACAATGAGTAATTCAAGCATCATCACAATTCCATGCAGAATAAAACAAATTATAAATATGTGGCAGGAGGTAGGAAGAGCAATGTATGCCCCTCCCATTGCAGGAAAAATAACATGTAACTCAAGTATCACAGGACTACTATTAGTACGTGATGGAGGTAATGGAGATAACACAACAGATAACAAAACAGAAACATTCAGACCTGAAGGAGGAAATATGAAGGACAATTGGAGAAGTGAATTATATAAATATAAAGTAGTAGAAGTTAAGCCATTGGGAATAGCACCCACTAAAGCAAAAAGGAGAGTGGTGGAGAGAGAAAAGAGCAGTGGGAATAGGAGCTGTGTTCCTTGGGTTCTTGGGAGCAGCAGGAAGCACTATGGGCGCGGCGTCAGTGACGCTGGCGGTACAGGCCAGACAATTGTTGTCTGGTATAGTGCAACAGCAAAGCAACTTGCTGAGAGCTATAGAGGCACAACAGCATATGTTGCAGCTCACAGTCTGGGGCATTAAGCAGCTCCAGGCAAGAGTCCTGGCTATCGAAAGATACCTAAAGGATCAACAGCTCCTAGGAATTTGGGGCTGCTCTGGAAAACTCATCTGCACCACTGCTGTGCCTTGGAACTCCAGTTGGAGTAATAAATCTGAAAAAGATATCTGGGATAACATGACCTGGATGCAGTGGGATAGAGAAATTAGCAATTACACAAACACAATATACCAGTTGCTTGAAGACTCGCAAAGCCAGCAGGAAAAGAATGAAAAAGATTTATTAGCATTGGACAAGTGGCAAAATCTGTGGAGTTGGTTTAGCATAACAAAGTGGCTATGGTATATAAAAATATTCATAATGATAGTAGGAGGCTTGATAGGTTTAAGAATAATTTTTGCTGTGCTATCTGTAGTAAATAGAGTTAGGCAGGGATACTCGCCTTTGTCGTTGCAGACCCTTATCCCAAACCAGGGGGGACCCGAAGAGCTTGGAGGAACCGAAGAAAAAGGTGGAGAGCAAGACAGAGGCAGATCCATTCGCTTAGTGAGCGGATTATTGCCACTTGCCTGGGACGATCTGCGGAACCTGTGCCTCTTCAGCTACCACCGATTGAGGGACTTCATATTAGTGACAGCGAGAGTGGTGGAACTTCTGGGACGCAGCAGTCTCAAGGGACTACAGAGGGGGTGGGAAGCCCTTAAATATCTAGGAAATCTTGTGCAGTATTGGGGTCTGGAACTAAAAAAGAGTGCTATTAGTCTGTTTGATACCATAGCAATAGCAGTAGCTGAGGGAACAGATAGGATTATAGAATTCATACAAAGATTTTGTAGAGCTATCCGCAACCTACCTAGAAGAATAAGACAGGGTTTCGAAGCAGCTTTGCTATAAAATGGGGGGTAAATGGCCAAAAAGAAGCCTAGGTGGATGGACTGATGTAAGAGAAAGAATGAGAAGAGCTGAGCCAGCAGCAGAGGGAGTAGGAGCAGCGTCTCGAGACTTAGATAAACATGGAGCACTTACAAGCAGCAATACACCCACCAATAATGCTGCTTGTGCCTGGCTGGAAGCGCAAGAGGAAACAGA
>C.ZA.03.03ZASK026B2_DQ011165_F1.FR.96.MP411_AJ249238
TCTGTTGTGTGACTCTGGTAACTAGAGATCCCTCAGACCAATTTGGTAGTGTGGAAAATCTCTAGCAGTGGCGCCCGAACAGGGACCTGAAAGCGAAAGTAAGACCAGAGGAGATCTCTCGACGCAGGACTCGGCTTGCTGAAGTGCACTCGGCAAGAGGCGAGAGCGGCGGCTGGTGAGTACGCCAATTTTATTTGACTAGCGGAGGCTAGAAGGAGAGAGATGGGTGCGAGAGCGTCAATATTAAGAGGGGGAAAATTAGATAAATGGGAGAAAATTAGGTTAAGGCCAGGGGGAAGGAAACATTATAGGCTAAAACACTTAGCATGGGCAAGCAGGGAGCCGGAAAGATTTGCACTTAACCCTAGCCTTTTAGAAACAGCAGAAGGCTGTAAACAAATAATACAACAGCTACACCCAGCTCTTAAGACAGGAACAGAGGAATTTACATCATTATATAACACAATAGCAACTCTCTACTGTATACATGCAGGGATAGATGTACGAGACACCAAGGAAGCCTTAGACAAGGTAGAGGAAGAACAAAACAAAAGTCAGCAAAAAACACAGCAAGCAAAAGCAGCTGACGGAAAAGTCAGTCAAAATTATCCTATAGTGCAGAATCTCCAAGGGCAGATGGTACACCAGGCCATATCACCTAGAACTTTGAATGCATGGGTAAAAGTAATAGAGGAGAAGGCCTTTAGCCCAGAAGTAATACCCATGTTTACAGCATTATCAGAAGGAGCTACCCCGCAAGATTTAAACACCATGTTAAATACAGTGGGGGGACATCAGGCAGCCATGCAGATGTTAAAAGATACCATCAATGAGGAGGCTGCAGAATGGGATAGAATACATCCAGTCCATGCAGGGCCTATTGCACCAGGCCAAATGAGGGAACCTAGAGGAAGTGACATAGCAGGAACTACTAGTACCCTTCAGGAACAGATAGCATGGATGACAAGTAACCCACCTGTCCCAGTGGGAGAAATCTATAAAAGATGGATAATTCTGGGGTTAAATAAAATAGTAAGAATGTATAGCCCTGTCAGCATATTGGACATAAAACAAGGGCCAAAGGAACCCTTCAGAGACTATGTAGATCGGTTCTTTAAAGTTTTAAGAGCTGAACAAGCTACACAAGATGTTAAAAATTGGATGACAGACACCTTGTTGGTCCAAAATGCGAACCCAGATTGTAAGACCATTTTAAAGGCATTGGGACCAGCAGCTTCATTAGAAGAAATGATGACAGCATGTCAGGGAGTGGGAGGACCTGGCCACAAAGCAAGAGTGTTGGCTGAGGCAATGAGCCAAGCAAACAGTCACATAATGATGCAGAGAAGCAATTTTAAGGGATCTAAAAGACCTGTTAAATGTTTCAACTGTGGCAAGGAAGGGCATATAGCCAGAAATTGCAGGGCCCCTAGAAAAAAGGGCTGTTGGAAATGTGGAAAAGAAGGACACCAAATGAAAGACTGTACTGAAAGGCAGGCTAATTTTTTAGGGAAAATCTGGCCTTCCCACAAGGGGAGGCCAGGGAATTTCCTCCAGAGCAGGCCAGCGCCAACAGCCCCACCAGCGGAGAGCTTCAGGCCAGAGCCAACAGCTCCATCAGCGGAGAGCTTCAGGTTCGAGGAGACAACCCCCGCTCAGAAACAGGAGTCGAAGGACAGGGAACCCTTAACTTCCCTCAAATCACTCTTTGGCAGCGACCCCTTGTCTCAATAAAGGTAGGGGGCCAAATAAAGGAGGCTCTATTAGACACAGGAGCAGATGATACAGTATTAGAAGAAATAAATTTGCCAGGAAAATGGAAGCCAAAAATGATAGGAGGAATTGGAGGTTTTATCAAAGTAAGACAGTATGATCAAATACTTATAGAAATTTGTGGAAAAAAGGCTATAGGTACAGTATTAGTAGGACCTACACCTGTCAACATAATTGGAAGAAATTTGTTGACTCAGCTTGGATGCACACTAAATTTTCCAATTAGCCCCATTGAAACTGTACCAGTAAAATTAAAGCCAGGAATGGACGGCCCAAGGGTTAAACAATGGCCATTGACAGAAGAAAAGGTAAAAGCGTTAATAGCAATTTGTGAAGAAATGGAGAAGGAAGGAAAAATTGAAAAAATTGGGCCTGAAAATCCATACAACACTCCAATATTTGCCATAAAAAAGAAGGACAGTACTAAGTGGAGAAAATTAGTAGATTTCAGGGAACTCAATAAAAGAACTCAAGACTTTTGGGAGGTTCAATTAGGAATACCACACCCAGCGGGATTAAAAAAGAAAAAATCAGTGACAGTACTGGATGTGGGGGATGCATATTTTTCAGTTCCTTTAGATAAAGACTTCAGAAAATATACTGCCTTCACCATACCTAGTATAAACAATGAGACACCAGGGATTAGATATCAATATAATGTGCTCCCACAGGGATGGAAAGGATCACCAGCAATATTCCAAAGTAGCATGACAAAAATCTTAGAGCCTTTTAGGGCAAAAAATCCAGAAATAGTCATCTATCAATATATGGATGACTTATACGTAGGATCTGACTTAGAAATAGGGCAGCATAGAGCAAAAATAGAAGAGTTAAGAGAACATCTATTAAAATGGGGATTCACCACACCAGATAAGAAACATCAGAAAGAACCCCCATTTCTTTGGATGGGGTATGAACTCCACCCTGACAAATGGACAGTACAGCCTATAAAGTTGCCAGAAAAGGAAAGCTGGACTGTCAACGATATACAAAAGTTAGTGGGAAAATTAAACTGGGCAAGTCAAATTTACCCAGGGATTCAGGTAAAGCAACTTTGTAAACTCCTTAGGGGGACCAAAGCACTAACAGACATAGTACCACTAACTGAAGAAGCAGAATTAGAATTGGCAGAGAACAGAGAAATTCTAAAAGAACCAGTACATGGAGTATATTATGACCCATCAAAAGATTTGATAGCTGAAATACAGAAACAGGGACATGATCAGTGGACATATCAAATTTACCAAGAACCATACAAAAATCTGAAAACAGGGAAGTATGCAAAAAGGAGGGCGGCCCACACTAATGATGTAAAACAGTTAACAGAAGCAGTGCAAAAAATAGCCATGGAAAGCATAGTAATCTGGGGAAAGACCCCTAAATTTAGACTACCCATCCAAAAAGAAACATGGGAGACATGGTGGACAGACTATTGGCAAGCCACTTGGATTCCTGAGTGGGAGTTTGTTAACACCCCTCCCCTAGTGAAATTATGGTACCAGCTGGAGAAAGAACCCATAGCAGAAGCAGAAACTTTCTATGTAGATGGAGCAGCTAATAGGGAAACTAAAATAGGAAAAGCAGGGTATGTTACTGACAAAGGAAGGCAGAAAGTTGTTACTTTAACTGAAACAACAAATCAGCAGGCTGAATTACAAGCAATTCAGCTAGCTTTGCAAGATTCAGGATCAGAAGCAAACATAGTAACAGACTCACAGTATGCATTAGGAATCATTCAAGCACAACCAGATAAGAGTGAATCAGAGATAGTTAACCAGATAATAGAAGAGTTAATAAAAAAGGAAAGGATATACCTGTCATGGGTACCAGCACATAAAGGAATTGGAGGAAATGAACAAGTAGATAAATTAGTAAGTAGTGGAATCAGGAAAGTACTGTTTCTAGATGGAATAGATAAGGCTCAAGAAGAGCATGAAAAGTATCACAGCAATTGGAGAGCAATGGCCAGTGAATTTAACCTGCCACCCATAGTAGCAAAAGAAATAGTAGCTAGCTGTGATAAATGCCAGCTAAAAGGGGAAGCTATACATGGACAAGTAGACTGTAGTCCAGGGATCTGGCAATTAGATTGTACACATTTAGAAGGAAAAGTCATCCTAGTAGCAGTCCATGTAGCCAGTGGCTACATAGAAGCAGAGGTTATCCCAGCAGAGACAGGACAAGAAACAGCATACTATATACTAAAATTAGCAGGAAGATGGCCAGTCAAAGTAATACACACAGACAATGGCACTAATTTCACCAGTGCTGCAGTTAAGGCAGCCTGTTGGTGGGCAGGTATCCAACAGGAATTTGGGATTCCCTACAATCCCCAAAGTCAGGGAGTGGTAGAATCCATGAATAAAGAATTAAAGAAAATCATAGGGCAGGTAAGAGATCAAGCTGAACACCTTAAGACAGCAGTACAAATGGCAGTATTCATTCACAATTTTAAAAGAAAAGGGGGGATTGGGGGGTACAGTGCAGGGGAAAGAATAATAGACATAATATCAACAGACATACAAACTAAAGAACTACAAAAACAAATTACAAAACTTCAAAATTTTCGGGTTTATTTCAGAGACAGCAGAGACCCTATTTGGAAAGGACCAGCCAAACTACTCTGGAAAGGTGAAGGGGCAGTTGTAATACAAGACAATAGTGACATAAAGGTAGTACCAAGAAGGAAAGCAAAAATCATTAGGGACTATGGAAAACAGATGGCAGGTGCTGATTGTGTGGCAGGTAGACAGGATGAGGATTAAGACATGGAATAGTCTAGTAAAGCACCATATGTATATTTCAAGAAAAGCTAAAGGATGGTTTTACAGACACCATTTTGAAAGCAGACATCCAAAAGTAAGTTCAGAAGTACACATTCCATTAGGGGAAGCAAAATTAATAATAAGAACATATTGGGGTTTGCAACCAGGAGAAAGGGAATGGCATTTGGGTCATGGATGTTCCATAGAATGGAGACTGAGAAGATATAGCACACAAGTAGACCCTGGTTTGGCAGATCAGCTAATTCATATGCATTATTTTGATTGTTTTGCAGACTCTGCCATAAGACAAGCCATACTAGGACAGATAGTTATTGCTAGGTGTGAATATCAAGCAGGACATAATAAGGTAGGATCTCTCCAATACTTGGCACTGACAGCATTGCTAAAACCAAAAAAGAGAAAGCCACCTCTGCCTAGTGTTAGGAAGTTAGCAGAGGACATATGGAACAGTCCCCGGAAGACCAGGGGCCACAGAGGGAACCATATAATGAATGGGCACTAGAGGTTCTAGAGGAACTCAAACAGGAAGCTGTCAGACACTTTCCTAGACCATGGCTCCATAGCTTAGGACAATATATCTATGAAACATATGGGGATACTTGGACAGGAGTCGAAGCTCTAATAAGAACACTGCAACAACTACTGTTTACTCATTTCAGAATTGGGTGCCAGCATAGCAGAATAGGCATCACGCGGCAGAGAAGAAGAAATGGAGCCAGTAGATCCTAACCTAGAGCCCTGGAACCATCCAGGAAGTCAGCCTAAAACTGCTTGCAATAGATGTTATTGTAAATCTTGTAGCTACCATTGTCTAGTTTGCTTTCAGACGAAAGGCTTAGGCATTTCCCATGGCAGGAAGAAGCGGAGACAGCGACGAAGCGCTCCTCCAAGCAGTGAGGATCATCAAAATCTTATATCAAAGCAGTAAGTATATGTAATGCTGAACTTTTTAGCAGGAGTAGATTATAGAATAGGAGTAGGAGCATTGATAGTAGGATTAATCATAGCAATAGTTGTGTGGATCATAGTATATCTAGAATATAGAAAATTGGTAAAACAAAGGAAAATAGACTGGTTAATTGAAAGAATTAGGGAAAGAGCAGAAGACAGTGGCAATGAAAGTGAGGGGGATACAGAAGAATTGGCAACAATGGTGGAAATGGGGTCTTTTATTTCTGGGGATATTAATAATCTGTAGTGCTGCAGACAACTTGTGGGTTACAGTCTATTATGGGGTACCTGTGTGGAAAGAAGCAAAAACTACTCTATTCTGTGCATCAGATGCTAAAGCATATGAAAAGGAGGTACATAATGTCTGGGCTACACATGCCTGTGTACCCACAGACCCCAACCCACAAGAAATAGTTTTGGTAAATGTAACAGAAAATTTTAATATGTGGAAAAATGACATGGTGGATCAGATGCATGAGGATGTAATCAGTTTATGGGATCAAAGCCTAAAGCCATGTGTAAAGTTGACCCCACTCTGTGTCACTTTAGATTGTCATAATGCTACCAATAATATCAGTAGTGATATCTACAATAATATTACCACCATGGGGGAAATAAAAAATGTAATAAGGAATTGCTCTTTCAATGTAACCACAGAACTAAGAGATAAGAAGCACAAAGAGTATTCACTTTTTTATAGACTTGATATAGTACCACTTGAAAAGGACAACTCTAGTAATGGCAACTCTAGTAGCCAATCTGAGAAATATAGATTAATAAATTGTAATTCCTCAACTGTAACACAAGCCTGTCCAAAGGTCACTTTTGACCCAATTCCTATACATTATTGCGCTCCAGCTGGTTATGCGACTCTAAAGTGTAATAATAAGACATTCAATGGGACGGGACCATGTCAAAATGTCAGTACAGTACAATGTACACATGGAATTAAACCAGTGGTATCAACTCAACTACTGTTAAATGGTAGCATATCAGAAGATGGGATAATAATTAGATCTGAAAATCTGACAAATAATGCTAAAACAATAATAGTGCAGCTTGATGAAGCCATAAACATTGTGTGCGCAAGACTCAACAATAATACAAGAAAAAGTGTAAGGATAGGACCAGGACAAACATTCTATGCAACAAACATAATAGGAGATATAAGACAAGCACATTGTAACATTAGTAGAAATAAATGGAATGAAACTTTACAAAAGGTAGGTAAAAAATTAAGCGAGTACTTCCCAAATAGAACAATAAGTTTTATGCCATCCTCAGGAGGGGACCTAGAAATTACAACACATAGCTTTAATTGTCAAGGAGAATTTTTCTATTGCAATACATCACAACTATTTAATAGAAATTACAGTTCTGAATATAATAGTACAGGAAGTAATTCAACCAACAGTAGTTCAACCATCACACTTCCATGCAGAATAAAACAAATTATAAACATGTGGCAGGAGGTAGGACGAGCAGTGTATGCCCCTCCCATTGCAGGAAACATAACATGTAATTCAAATGTCACAGGATTACTATTAGTACGTGATGGAGGAAACGACAGCACACCAACAGAAACATTCAGACCTGAAGGAGGAAATATGAAGGATAATTGGAGAAGTGAATTATATAAATATAAAGTGGTAGAAGTTAAGCCACTAGGAATAGCTCCCACTGGAGCAAAAAGGAGAGTGGTGGAGAGAGAAAAAAGAGCAGTAGGAATAGGAGCTGTGTTCCTTGGGTTCTTGGGATTAGCAGGAAGCACTATGGGCGCAGCGTCAATAACGCTGACGGCACAGGCCAGACAAGTGTTGTCTGGTATAGTGCAACAGCAAAGCGATTTGCTGAAGGCTATAGAGGCGCAACAGCATATGTTGCAACTCACGGTCTGGGGCATTAAGCAGCTCCAGGCAAGAGTCCTGGCTATAGAAAGATACCTACAGGATCAACAGCTCCTAGGAATTTGGGGCTGCTCTGGAAAACACATCTGCACCACTTCTGTGCCTTGGAACTCCAGTTGGAGTAATAAATCTTATAATGAAATTTGGAACAACATGACCTGGATGCAGTGGGATAAAGAAATTAGTAATTACACAACAACAATATACCAGCTGCTTGAAAAATCGCAAAGCCAGCAGGAACAAAATGAAAAGGAGTTATTAGAATTGGACAAGTGGCAGAATCTATGGAATTGGTTTAGCATAACAAATTGGCTATGGTATATAAGACTATTCATAATGATAGTAGGAGGCTTGATAGGTTTGAGAATAATTTTTGCTGTGCTATCTATAGTAAACAAAGTTAGGCAGGGATACTCACCTCTGTCGTTCCAGACCCTTACCCCAAACCCGAGGGGACCAGACAGGCTCGGAGGAATCGAAGAAGAAGGTGGAGAGCAAGACAGAGACAGATCCATTCGCTTAGTGAGCGGATTCTTCTCACTTGCGTGGGACGACCTACGGAGCCTGAGCCTCTTCTGCTACCACCGATTGAGAGACTTCATATTGATTGCAACGAGAGTGGTGGAACTTCTGGGGCAGAGGGGGTGGGAAGCCCTTAAGTATCTAGGAAGTCTTGTGCAGTATTGGGGTCTGGAATTAAAAAAGAGTGCTATTAGTCTGCTTGATACCATAGCAATAGCAGTAGCTGAGGGAACAGATAGGATTATAGAATTCATACTAAGAATTTGCAGGGCTATCTGCAACCTACCTAGACGAATAAGACAGGGTTTTGAAGCAGCTTTGCTATAAAATGGGGGGCAAATGGTCAAAAAGAAGCATAGTTGGATGGGATAATGTAAGAGAAAGACTAAGGAAAACTGAGCCAGCAGCAGAGGGAGTAGGAGCCGTGTCTCAAGACTTAGCTAGACATGGAGCAATTACAAGTAGCAACACAGCCGCCACTAATGCCGATTGTGCCTGGCTGGAAGCGCAAGAGCAAGA
>C.IN.98.98IN022_AF286232_F2.CM.95.MP255_AJ249236
GCGAAAGCGAAAGTAAGACCAGAGGAGAACTCTCGACGCAGGACTCGGCTTGCTGAAGTGCACTCGGCAAGAGGCGAGGGGCGGCGACTGGTGAGTACGCCGATTTTATTTGACTAGCGGAGGCTAGAAGGAGAGAGATGGGTGCGAGAGCGTCAATATTAAGCGGGGGAAAATTAGATAAATGGGAGAAAATTAGGTTAAGGCCAGGGGGAAAGAAACAATATAGGCTAAAACACCTAGTATGGGCAAGCAGGGAGCTGGAAAGATTTGCACTTAACTCTGGCCTTTTAGAGACAGCAGAAGGCTGTAAACAAATAATAAAACAGCTACAACCAGCTCTTAAGACAGGAACAGAGGAACTTAGATCATTATACAACACAGTAGCAACTCTCTATTGTGTACATGCAAGGATAGAAGTAAAAGACACCAAAGAAGCTTTAGACAAGATAGAGGAAGAACAAAACAAAGTTCAGCAAAAAATGCAGCAGACAAAAGAGGCTGACGGGAAGGTCAGTCAAAATTATCCTATAGTGCAGAATCTCCAAGGGCAAATGGTACACCAGGCCATATCACCTAGAACTTTAAATGCATGGGTAAAAGTAGTAGAAGAGAAGGCCTTTAGCCCAGAGGTAATACCCATATTTACAGCATTATCAGAAGGAGCCACCCCACAAGATCTAAACACCATGTTAAATACAGTGGGGGGACATCAAGCAGCCATGCAAATGTTAAGAGATACCATTAATGAAGAGGCTGCAGAATGGGATAGATTACATCCAGTACAGGCAGGACCTATTCCACCAGGCCAAATGAGAGAACCAAGGGGAAGTGACATAGCAGGAACTACTAGTACCCTTCAGGAACAAATAGCATGGATGACAAGTAACCCACCTGTCCCAGTGGGAGACATCTATAAAAGATGGATAATTATGGGGTTAAATAAAATAGTAAGAATGTATAGCCCCACCAGCATTTTGGACATAAGACAAGGGCCAAAGGAACCCTTTAGAGACTATGTAGACCGGTTCTTTAAAACTTTAAGAGCTGAACAAGCTACACAAGATGTAAAAAATTGGATGACAGAAACCTTGTTGGTCCAAAATGCGAACCCAGATTGTAAGACCATTTTAAGAGCATTAGGACCAGGGGCTTCATTAGAAGAGATGATGACAGCATGTCAGGGAGTGGGAGGACCTGGCCACAAAGCAAGAGTATTGGCTGAGGCAATGAGCCAAGCAAACAGTACCATAATGATGCAGAGAGGCAATTTTAAAGGCCCTAAAAGAATTGTTAAATGTTTCAACTGTGGCAAGGAAGGGCACATAGCCAAAAATTGCAGGGCCCCTAGGAAAAAAGGCTGTTGGAAATGTGGAAAGGAAGGACACCAAATGAAAGACTGTACTGAGAGACAGGCTAATTTTTTAGGGAGAATCTGGCCTTCCCACAAGGGGAGGCCAGGGAATTTCCTCCAGAGCAGACCAGAGCCAACAGTCCCAACAGCCCCGCCAGCGGAGAGCTTCGGGTTCGGGGAGACAACCCCAGCTCCGAAGCAGGAGTCGAAAGACAGGGAACCCTTAACTTCCCTCAAATCACTCTTTGGCAGCGACCCCTTGTCTCAATAAAAGTAGGGGGCCAAATAAAAGAGGCTCTCTTAGGCACAGGAGCAGATGATACAGTATTAGAAGAAATAAATTTGCCAGGAAAATGGAAACCAAAAATGATAGGAGGAATTGGAGGTTTTATCAAAGTAAGACAATATGATCAAATAACTATAGAAATTTGTGGAAAAAAGGCTATAGGTACAGTATTAGTAGGACCCACACCTGTCAACATAATTGGAAGAAATCTGTTGACTCAGCTTGGATGCACACTAAATTTTCCAATCAGTCCTATTGAAACTGTACCAGTAAAATTAAAGCCAGGAATGGATGGGCCAAAGGTTAAACAATGGCCATTGACAGAAGAGAAAATAAAAGCATTAACAGAAATTTGCGAGGAAATGGAGAAGGAAGGAAAAATTACAAAAATTGGGCCTGAAAATCCATATAACACTCCAATATTTGCAATAAAAAAGAAGGACAGTACTAAGTGGAGAAAATTAGTAGATTTCAGGGAACTCAATAAAAGAACTCAAGATTTTTGGGAAGTTCAATTAGGAATACCACACCCAGCAGGGTTAAAAAAGAAAAAATCAGTGACAGTACTGGATGTGGGGGATGCATATTTTTCAGTTCCTTTATATGAAGACTTCAGGAAGTATACTGCATTCACCATACCTAGTATAAACAATGAAACACCAGGGATTAGGTATCAATATAATGTGCTTCCACAGGGATGGAAAGGATCACCATCAATATTCCAGGCTAGCATGACAAAAATCTTAGAGCCCTTTAGGACACAAAATCCAGAAATAGTCATCTATCAATATATGGATGACTTGTATGTAGGATCTGACTTAGAAATAGGGCAACATAGAGCAAAAATAGAGGAGTTAAGAGAACATCTGTTAAAGTGGGGATTTACCACACCAGACAAGAAACATCAGAAAGAACCTCCATTTCTGTGGATGGGGTATGAACTCCATCCTGACAAATGGACAGTACAGCCTATACAGCTGCCAGAAAAAGATAGCTGGACTGTCAATGATATACAGAAGTTAGTGGGAAAATTAAACTGGGCAAGTCAGATTTACCCAGGAATTAAAGTAAGACAACTTTGTAAACTCCTTAGGGGGACCAAAGCACTAACAGATGTAGTACCACTAACTGAAGAAGCAGAATTAGAATTGGCAGAGAACAGGGAAATTCTAAAAGAACCAGTACATGGAGTATATTATGACCCATCAAAAGAATTGATAGCTGAAATACAGAAACAGGGGGAAGACCAATGGACATATCAAATTTACCAAGAACCATTCAAAAATCTGAAAACAGGGAAATATGCAAAAATGAGGACTGCCCACACAAATGATGTAAAACAGTTAACAGAGGCTGTGCAGAAAATAGCCATGGAAAGCATAGTAATATGGGGAAAGACTCCTAAATTCAGATTACCCATCCAAAAAGAAACATGGGAGATATGGTGGACAGACTATTGGCAAGCCACCTGGATTCCTGAGTGGGAATTTGTTAATACCCCTCCCCTAGTAAAATTATGGTATCAGCTGGAGAAAGATCCCATAGCAGGAGTAGAAACTTTCTATGTAGATGGAGCAGCTAACAGGGAAACTAAATTAGGGAAAGCAGGGTATGTTACTGACAGGGGAAGGCAGAAAATTGTTTCTTTGACTGAAACAACAAATCAGAAGACTGAGTTGCACGCAATTTATCTAGCTCTGCAAGATTCAGGATCAGAAGTAAACATAGTAACAGATTCACAGTATGCATTAGGGATCATTCAAGCACAACCAGATAAGAGTGAATCAGAGTTAGTTAACCAAATAATAGAACAATTAATAAACAAGGAAAGGGTCTATCTGTCATGGGTACCAGCACATAAAGGAATTGGAGGAAATGAACAAGTAGATAAATTAGTAAGTAGTGGAATCAGGAAAGTATTATTTCTAGATGGAATAGATAAAGCCCAAGAAGAGCATGAAAGGTATCATAGCAATTGGAGAGCAATGGCTAGTGACTTTAATCTGCCACCCATAGTAGCAAAAGAAATAGTAGCTAGCTGTGACCAATGTCAGCTAAAAGGGGAAGCCATGCATGGACAAGTGGACTGTAGTCCAGGAATATGGCAATTAGATTGTACACACTTAGAAGGAAAAATCATCCTGGTAGCAGTACATGTAGCCAGTGGCTACATAGAAGCAGAGGTTATCCCAGCAGAAACAGGACAAGAAACAGCATACTTTATACTAAAATTAGCAGGAAGATGGCCAGTCAAAGTAATACATACAGACAATGGAAGTAATTTCACCAGTGCTGCAGTTAAAGCAGCCTGTTGGTGGGCAGGGGTCCAACAGGAATTTGGAATTCCCTACAATCCCCAAAGTCAGGGAGTAGTAGAATCCATGAATAAAGAATTAAAGAAAATTATAGGGCAGGTAAGAGATCAAGCTGAGCACCTTAAGACAGCAGTACAAATGGCAGTATTCATTCACAATTTTAAAAGAAAAGGGGGGATTGGGGGGTACAGTGCAGGGGAAAGAATAATAGACATAATAGCAACAGACATACAAACTAAAGAATTACAAAAACAAATTATAAAAATTCAAAATTTTCGGGTTTATTACAGAGACAGCAGAGACCCCATTTGGAAAGGCCCAGCCAAACTACTCTGGAAAGGTGAAGGGGCAGTAGTAATCCAAGATAATAGTGACATAAAGGTAATACCAAGGAGGAAAGCAAAAATCATTAAGGACTATGGAAAACAGATGGCAGGTGCTGATTGTGTGGCAGGTAGACAGGATGAAGATTAGAACATGGAATAGTTTAGTAAAACACCATATATATGTTTCAAAGAGAGCTAATGGATGGTTTTACAGACATCATTATGACAGCAGAAATCCAAAAGTAAGTTCAGAAGTACACATCCCATTAGGGGAAGCTAGATTAGTAATAAAAACATATTGGGGATTGCAAACAGGGGAAAGAGATTGGCATTTGGGTCACGGAGTCTCCATAGAATGGAGATTGAGAAGCTATAACACACAAATAGAACCTGGCCTGGCAGACCAGCTAATTCATATACATTATTTTGATTGTTTTGCAGACTCTGCCATAAGGAAAGCCATATTAGGACACATAGTTATTCCTAGGTGTGACTATCAAGCAGGACTTAACAAGGTAGGATCTCTGCAATACTTGGCACTGACAGCACTGATAAAACCAAAAAAGAGAAAGCCACCTCTGCCTAGTGTTAAGAAATTAGTGGAGGATATATGGAACAACCCCCAGAAGACCAAGGGCCACAGAGGGAACCATACAATGAATGGACACTAGAGCTTCTAGAGGAACTCAAACAAGAAGCTGTCAGACACTTTCCTAGACCATGGCTTCATGGCTTAGGACAACACATCTATGAAACCTATGGGGATACTTGGCCAGGGGTTGAAGCTCTAATAAGAATACTGCAACAACTACTGTTTATTCATTTTAGAATTGGGTGCCAGCATAGCAGAATAGGCATTTGGAGACAGAGAAGAGCAAGAAATGGAGCCAGTAGATCCTAACCTAGAGCCATGGAACCATCCAGGAAGTCAGCCTGAAACTGCTTGCAATAACTGTTATTGTAAACGCTGTAGCTACCATTGTCTAGTTTGCTTTCAGAAAAAAGGCTTAGGAATTTCCTATGGCAGGAAGAAGCGGAGACAGCGACGAAGCACTCCTCCAAGCAGTGAGGATCATCAAAGCCTTATATCAAACCAGTGAGTATCTGTAATGTTAGATTTAGATTATAGATTAGCAGTAGGAGCATTGATAGTAGCACTAATCATAGCAATAGTTGTGTGGATCATAGTATATATAGAATATAGGAAATTGGTAAAACAAAGAAAAATAGACCAGTTAATTAAAAGAATTAGGGAAAGAGCAGAAGACAGTGGCAATGAGAGTAAGGGAGACACTGAGGAATTATCTACAATGGTGGATATGGGGAATCTTAGGCTTTTGGATGTTAATGAATTGTGCTAATGCTACAGATGACTTGTGGGTCACAGTCTATTATGGAGTACCTGTGTGGAAGGAACCAACCACTACTCTGTTTTGTGCATCAGATGCTAAAGCATATGAGAAAGAAGTACATAATGTCTGGGCTACACATGCCTGTGTACCCACAGACCCCAACCCACAAGAAATGGTTTTGAAAAATGTAACAGAAAATTTTAACATGTGGAAAAATGACATGGTGGATCAGATGCATGAGGATGTAATCAGTTTATGGGATCAAAGCCTAAAGCCATGTGTAAAGTTGACCCCACTCTGTGTCACTTTAAAATGTAGCAATAATGTTACTATAAATAGTACCCGCATTAAAAACAGTGAGGAAATAAAAAATTGCTCTTTCAATACAACCACAGAATTAAGAGATAGACGGAAGAAAGAGTATGCACTTTTTTATAGACTTGATATAACACCACTTGATAATAAGAAGAACTCTAGTGAGAACTCTAGTGAGTATTATAGATTAATAAATTGTAATACCTCAGCCATAACACAAGCCTGTCCAAAGGTCACTTTTGATCCAATTCCTATACACTATTGTGCTCCTGCTGGTTATGCGCTTCTAAAATGCAATAATAAGACATTCAATGGGACAGGACCATGCAATAATGTTAGCACAGTACTATGTACACATGGAATTAAGCCAGTGGTATCAACTCAACTACTGTTAAATGGTAGTCTAGCAGAAGGAGAGATAATAATTAGATCTGAAAATCTGACAAACAATGCCAAAACAATAATAGTACAGCTTAATCAATCTGTAGAAATTGTGTGTACAAGACCCAACAATAATACAAGAAAAAGTATAAGGATAGGACCAGGACAAACATTCTATGCAACAGGAGACATAATAGGAGACATAAGAGAAGCACATTGTAACATTAGTGCAGACAAATGGAAGGAAACTTTACAAAGGGTCAGTAAAAAATTAAGAGAACACTTCCCTGGTAAAACAATAAACTTTACATCATCCTCAGGAGGGGACTTAGAGATTACAACACATAGCTTTAATTGTAGAGGAGAATTTTTCTATTGTAACACATCAGGTCTGTTTAATGGTACATACAATCCTAATGTTACAGAAAGTAATTCAAACTCAACAAATGCAACCATCACACTCCCATGCAGAATAAAGCAAATTATAAATTTGTGGCAGGAGGTGGGACGAGCAATGTATGCCCCTCCCATTGCAGGAAACATAACATGTAAATCAAATATCACAGGACTATTATTGACACGTGATGGAGGAACAAATGATACAAGTAAGACAGAGATATTCAGACCTGGAGGAGGAGATATGAGGGACAATTGGAGAAGTGAATTATACAAATATAAAGTGGTAGAAGTTAAGCCATTGGGAGTAGCACCCACTGGAGCAAAAAGGAGAGTGGTGGAGAGAGAAAAAAGAGCAGTGGGAATAGGAGCTGTGTTCCTTGGGATCTTGGGAGCAGCAGGAAGCACTATGGGCGCGGCGTCAATAACGCTGACGGTACAGGCCAGACAATTGTTGTCTGGTATAGTGCAACAGCAAAGCAATTTGCTGAGAGCTATAGAGGCGCAACAGCATCTGTTGCAACTCACAGTCTGGGGCATTAAGCAGCTCCAGACAAGAGTCCTGGCTATCGAAAGATACCTAAAGGATCAACAGCTCCTAGGGATTTGGGGCTGCTCTGGAAAACTCATCTGCACTACTGCTGTACCTTGGAACTCCAGTTGGAGTAATAAATCTCAACAAGAGATTTGGGATAACATGACCTGGATGCAGTGGGATAGAGAAATTAGTAATTATACAAAAACAATATATGAATTGCTTGAAGAATCGCAATACCAGCAGGAAAGAAATGAAAAAGATTTATTAGCATTGGACAGTTGGAAAAATCTATGGGATTGGTTTAACATATCAAATTGGCTGTGGTATATAAAAATATTCATAATGATAATAGGAGGCTTGATAGGTTTAAGAATAATTTTTACTGTGCTCTCTTTAGTGAATAGAGTTAGGCAGGGATACTCACCTTTGTCGTTTCAGACCCATACCCCGAACCCAGGGGGTCCCGACAGGCTCGGAAGAATCGAAGAAGAAGGTGGAGAGCAAGACAACGCGAGATCCATTCGATTAGTGAACGGATTCTTAGCGCTTGCCTGGGACGACCTACGGAACCTGTGCCTCTTCCTCTACCGCCGCTTGAGAGACTTCATATCAGTGACAGCGAGAGTGGTGGAACTTCTGGGACGCAGCAGTCTCAAGGGACTACAGAGGGGGTGGGAAGCCCTTAAATATCTGGGAAGTCTTGTGCAGTATTGGGGTCTGGAACTAAAAAAGAGTGCTATTAGTCTGCTTGATACCATAGCAATAGCAGTAGCTGAAGGAACAGACAGGATTATAGAAATAGTACAAAGAATTTGTAGAGCTATCCGTAACATACCTAGGAGAATAAGACAGGGCGCTGAAAGAGCTTTGCAATAAAATGGGGGGCAAGTGGTCAAAACGCAGCATAGTTGGATGGCCTGCTATAAGAGAGAGAATGAGACGAGCTGAGCCAGCAGCAGAAGGAGTAGGAGCAGCGTCTCAAGACTTAGCTAAACATGGAGCACTTACAAGCAGCAACACAGACACCACTAATGCTGATTGTGCTTGGCTGAGAGCACAAGAGGAGGATGAGGAAGTAGGCTTTCCAGTCAAACCTCAGGTGCCTTTAAGACCAATGACTTATAAGGGAGCATTTGATCTCGGCTTCTTTTTAAAAGAAAAGGGGGGACTGGAAGGGTTAATTTACTCCAAGAAAAGGCAAGAGATCCTTGATTTATGGGTCTACCACACACAAGGCTACTTCCCTGATTGGCAAAACTACACACCAGGACCAGGGGTCAGATACCCACTGACCTTTGGGTGGTGTTTCAAGCAGGTACCAGTTGACCCAAGTGAAGTAGAAGAGGCCAATAAAGGAGAAGACAACTGTTTGCTACACCCTGTATGCCAGCTTGGAATGGAGGATGAACACAGAGAAGTATTAAAGTGGAAGTTTGACAGTCAACTAGCACACAGACACATGGCCCGCGAGCTACATCCGGAGTTTTACAAAGACTGCTGACACAGAAGGGACTTTCCACTGGGACTTTCCACTAGGGGCGTTCCAGGAGGAGTGGTCTGGGCGGGACTGGGAGTGGTCAACCCTCAGATGTTGCATATAAGCAGCTGCTTTTCGCCTGTACTGGGTCTCTCTTGGTAGACCAGATCTGAGCCTGGGAGCTCTCTGGCTATCTAGGGAACCCACTGCTTAAGCCTCAATAAAGCTTGCCTTGAGTGATTC
>C.IL.99.99ET1_AY255823_G.CM.96.96CMABB55_AY772535
GCGAGAGCGTCAATATTAAGAGGCGAAAAATTAGATGCCTGGGAAAGAATTAAGTTAAGGCCAGGAGGAAAGAAACACTATATGCTAAAACATCTAGTATGGGCAAGCAGGGAGCTGGAAAGATTTGCAATTAGCCCTAGCCTTTTAGAGACATCAGAAGGCTGTAGACAAATAATAAGCCAACTACAACCAGCTCTTAAGACAGGAACAGAGGAACTTAGATCATTATTTAATACAGTAGCAACACTCTATTGTGTACATGAAAAAATAAGGGTAAAAGACACCAAGGAAGCCTTAGACAGGATAGAGGAAGAACAAAACAAAAGTCAACAAAAAACACAGCAGGCAGCAGCAGCTGACAAAGGAAAGGTCAGTCAAAATTATCCTATAGTACAGAATCTCCAAGGGCAAATGGTACACCAGAACATATCACCTAGAACTTTGAATGCATGGGTAAAAGTAATAGAGGAGAAGGCTTTCAGCCCAGAAGTAATACCCATGTTCACAGCATTATCAGAAGGAGCCACCCCACAAGATTTAAACACCATGTTAAATACAGTGGGGGGACATCAAGCAGCCATGCAAATGTTAAAAGATACCATCAATGAGGAGGCTGCAGAATGGGATAGGTTACATCCAGTGCATGCAGGGCCTGTTGCACCAGGCCAAATAAGAGAACCAAGGGGAAGTGACATAGCAGGAACTACTAGTACCCTTCAGGAACAAATAACATGGATGACAAGTAACCCACCTATTCCAGTGGGAGACATCTATAAAAGATGGATAATTCTGGGGTTAAATAAAATAGTGAGAATGTATAGCCCTGTCAGCATTTTGGACATAAAACAAGGGCCAAAGGAACCCTTTAGAGACTATGTAGACCGGTTCTTTAAAACCTTAAGGGCTGAACAAGCTACTCAAGATGTAAAAAATTGGATGACAGACACCTTGTTGGTCCAAAATGCGAACCCAGATTGTAAGACCATCCTAAGAGCATTAGGGCCAGGGGCCTCACTAGAAGAAATGATGACAGCATGTCAGGGAGTGGGAGGTCCTGGCCACAAAGCAAGAGTGTTGGCTGAGGCAATGAGCCAAGTGACCAACACAAACATAATGATGCAGAAAAGCAATTTTAAGGGCCCTAGAAAAACTATTAAATGTTTCAACTGTGGCAAGGAAGGGCACCTAGCCAGAAATTGCAGGGCCCCTAGGAAAAAAGGCTGTTGGAAATGTGGAAGGGAAGGACACCAAATGAAAGACTGTACTGAGAGACAGGCTAATTTTTTAGGGAAAATCTGGCCTTCCAACAAGGGGAGGCCAGGGAATTTCCTCCAGAGCAGACCAGAGCCAACAGCCCCACCAGCAGAGAGCTTCAAGTTCGAGGAGACAACCCCCTCTCTGAAGCAGGAACAGAAAGACCAGGGACCCTACAAGGAACCCTTAACTGCCCTCAAATCACTCTTTGGCAGCGACCCCTTGTCACAATAAAAATAGGGGGACAGCTAAAGGAGGCTCTCTTAGACACAGGAGCAGATGATACAGTATTAGAAGAAATAAATTTGCCAGGGAAATGGAAACCAAAAATGATAGGAGGAATTGGAGGTTTTATTAAAGTTAGACAGTATGATCAAATACTTATAGAGATTTGTGGGAAAAAGGCTATAGGGTCAGTACTAGTAGGACCCACACCTGTCAACATAATTGGAAGAAATATGTTGACTCAACTTGGATGCACACTAAATTTTCCAATTAGTCCCATTGAAACTATACCAGTAAAATTAAAGCCAGGAATGGATGGCCCAAAAGTCAAACAATGGCCATTAACAGAAGAGAAAATAAAAGCATTAACAGCAATTTGTGAAGATATGGAGAGGGAAGGAAAAATTTCAAAAATTGGGCCTGAAAATCCATATAACACTCCAGTATTTGCCATAAAAAAGAAGGACAGTACTAAGTGGAGAAAATTAGTAGATTTCAGAGAACTCAATAAAAGAACTCAAGACTTTTGGGAAGTCCAATTAGGGATACCACACCCAGCAGGGTTAAAAAAGAAAAAATCAGTGACAGTACTGGATGTGGGGGATGCATATTTCTCAGTTCCTTTAGATGAAAATTTCAGGAAATATACTGCATTCACCATACCTAGTACAAACAATGAAACACCAGGGATTAGATATCAATATAATGTGCTCCCACAGGGATGGAAAGGATCACCAGCAATATTCCAAAGTAGCATGACAAAAATTTTAGAGCCCTTTAGAGCACAAAACCCAGAAATAGTTATCTATCAGTATATGGATGACTTGTATGTAGGATCTGACTTAGAAATAGGGCAACATAGAGCAAAAGTAGAGGAATTAAGAGGACATCTATTGAGGTGGGGATTTACCACCCCAGACAAGAAGCATCAGAAAGAACCTCCATTTCTTTGGATGGGGTATGAACTTCATCCTGACAAATGGACAGTACAGACTATACAGCTGCCAGAAAAGGATAGCTGGACTGTCAATGATATACAGAAGTTAGTGGGAAAATTAAACTGGGCAAGTCAGATTTACCCAGGGATTAAAGTAAGGCAATTGTGTAAACTCCTTAGGGGAGCCAAAGCACTAACAGACATCGTAGCACTAACTGAAGAGGCTGAATTAGAATTGGCAGAGAACAGGGAAATTCTAAAAGAACCAGTACATGGGGTATATTATGACCCATCAAAAGACTTAATAGCTGAAATACAGAAACAGGGGCATGACCAGTGGACCTATCAAATTTACCAAGAACCATTCAAAAATCTGAAAACAGGGAAGTATGCAAAAAGAAGGACTGCCCACACTAATGATGTAAAGCAGTTAACAGAGGCAGTGCAAAAAATAGCCATGGAAAGCATAGTAATATGGGGAAAGACTCCTAAATTTAGATTACCCATCCAGAAAGAGACATGGGAAACATGGTGGACAGACTATTGGCAAGCCACCTGGATTCCTGAGTGGGAGTTTGTTAATACCCCTCCCCTAGTAAAATTATGGTACCAGCTGGAGAAAGAACCCATAGTAGGAGCAGAAACTTTCTATGTAGATGGAGCAGCTAATAGGGAAACTAAAATAGGAAAAGCTGGGTATGTCACTGACAAGGGAAGGCAGAAAGTTGTTTCTCTAAATGAGACAACCAATCAGAAGACTGAATTACAAGCAATTCAGCTAGCTTTACAGGATTCAGGATCAGAAGTAAACATAGTAACAGACTCACAGTATGCATTAGGGATCATTCAAGCACAACCAGATAAGAGTGACTCAGAAATAGTTAATCAAATAATAGAACAGTTAATAAAGAAGGAAAGGGTCTACCTGTCATGGGTACCAGCACATAAAGGAATTGGAGGTAATGAACAAGTAGATAAATTAGTGAGTAAGGGAATCAGGAAAGTGCTGTTTCTAGATGGAATAGATAAGGCTCAAGAAGAGCATGAAAAATATCACAGCAATTGGAGAGCAATGGCTGATGAGTTTAATTTGCCACCCATAGTAGCAAAAGAAATAGTAGCTTGCTGTGATAAATGTCAGTTAAAAGGGGAAGCCATGCACGGACAAGTAGATTGTAGTCCAGGGATATGGCAATTAGATTGTACACACTTAGAAGGAAAAATCATCCTGGTAGCAGTCCATGTGGCCAGTGGCTACATAGAAGCAGAGGTTATTCCAGCAGAAACAGGACAAGAAACAGCATACTATATACTAAAATTAGCAGGAAGATGGCCCGTCAAAGTAATACACACAGACAATGGCAGTAATTTCACCAGCAGTGCAGTGAAAGCAGCCTGTTGGTGGGCAGGTATCAGACAGGAATTTGGGATTCCCTACAATCCCCAAAGTCAGGGAGTAGTAGAATCCATGAATAAAGAATTAAAGAAAATCATAGGGCAGGTAAGAGATCAAGCTGAACACCTTAAGACAGCAGTACAAATGGCAGTATTCATTCACAATTTTAAAAGAAAAGGGGGGATTGCGGGGTACAGTGCAGGGGAAAGAATAATAGATATAATAGCAACAGACATACAGACTAAAGAACTACAAAATCAAATTTTAAAAATTCAAAATTTTCGGGTTTATTACAGAGACAGCAGAGACCCTATTTGGAAAGGACCAGCCAAACTACTCTGGAAAGGTGAAGGGGCAGTAGTAATACAAGATAACAGTGACATAAAGGTAGTACCAAGGAGGAAAGCAAAAATCATTAGGGATTATGGAAAACAGATGGCAGGTGCTGATTGTGTGGCAGGTAGACAGGATGAAGATTAGAACATGGAATAGTCTAGTAAAACACCATATGTATATTTCAAGGAGAGCTAAGGGATGGTTTTATAGACATCATTATGAAAGCAGACATCCAAAAATAAGTTCAGAAGTACACATCCCATTAGGGGAGGCTAAATTAGTAATAACAACATATTGGGGTCTACAAACAGGAGAAAGAGATTGGCATTTGGGTCATGGAGTCTCCATAGAATGGAGATTGGGAAGGTATAACACACAAGTAGACCCTGGCCTGGCAGACCAACTAATTCATATGCATTATTTTGATTGTTTTGCAGAATCTGCCATAAGGAAAGCCATATTAGGACATATAGTTAGCCCTAGGTGTGACTACCAAGCAGGACATAATAAGGTAGGATCTCTACAATACTTGGCACTGACAGCATTGATAAAACCAAAAAAGATAAAGCCACCTCTGCCTAGTGTTAAGAAATTAGTAGAGGATAAATGGAACAAGCCCCAGAAGACCAGGGGCCGCAGAGAGAACCATACAATGAATGGACACTAGAGCTTTTAGAAGAAATCAAGCAGGAAGCTGTCAGACATTTTCCTAGACCATGGCTACATAGCTTAGGACAACATATTTATGAAACCTATGGGGATACTTGGATGGGAGTAGAAGCTTTAATAAGAATTCTGCAACAACTCCTGTTTATCCATTTCAGAATTGGGTGCTGGCATAGCAGAATAGGCATTATGCGGCAAAGAAGAACAAGAAATGGAGCCAATAGATCCTAGACTAGAGCCCTGGAACCATCCAGGAAGTCAGCCTAAAACTGCTTGTACTAAGTGCTATTGCAAAAAATGTAGCTATCATTGTCTAGTTTGCTTTCAGACAAAAGGCTTAGGCATTTCCTATGGCAGGAAGAAGCGGAGACAGCGACGAAGCACTCCTCCAAGCAGTGAGGATCATCAAAATTTTATACCAAAGCAGTAAGTACCAAATAGTAGATGTAATGATAAATTTAGAAATATTTGCAATAGTAGGACTAATAGTAGCAGCCATAGCAGCCATAATTGTGTGGATTATAGTATTTATACAATATAAGGAAATAAGAAAACAGAGAAAAATAGACTGGTTAATTAAAAGAATTAGGGAAAGAGAAGAAGACAGTGGCAATGAGAGTGACGGGGATACAGAGGAATTGGCAACAATGGTGGATATGGGGAATCTTAGGCTTTTGGATGTTCATAATTTGTAATGTGATGGGGAACAGGAACCTGTGGGTCACAGTCTATTATGGGGTACCTGTGTGGAAAGAAGCAAACCCTACTCTATTTTGTGCATCAGATGCTAAAGCATATAAGACAGAAATACATAATGTCTGGGCTACACATGCCTGTGTACCCACAGACCCCAGCCCACAGGAAATAGCTTTGAAAAATGTAACAGAAAATTTTAACATGTGGAAAAATGGCATGGTGGAGCAGATGCATCAGGATGTAATCAGTTTATGGGATCAAGGCCTAAAGCCATGTGTAAAGTTGACCCCACTCTGTGTTACTTTAAACTGTAGCAAGGCTATCAATAGTAGTGCGGATGTTGATACCTACAATGAAACCATGAAAGTGAAAAATTGTTCTTTCGATGTAACCACAGAACTAAGAGATAAACAACGGAAAGCATATGCACTTTTTTATAAACTTGATATAGTACCACTTAATGAGACTGAGGGTAATTATAGTGATTATAGATTAATAAACTGTAATGCTTCAACCATAACACAAGCCTGTCCAAAGGTCTCTTTTGACCCAATTCCTATACATTATTGTGCTCCAGCTGGTTATGCGATTCTAAAGTGTAATGATACAAAATTCAATGGAACAGGACCATGCAATAATGTCACCACAGTACAATGTACACATGGAATTAAACCAGTGGTATCAACACAATTATTGTTAAATGGTAGTACAGCAGAAGAAGTGATAATTAGATCTGAAAATCTGACAAACAATGCCAAGATAATAATAGTACAGCTTAGGAAATCTGTATACATTAATTGTACGAGACACAACAATAATACAAGAAAAGGTATAGGGATAGGACCAGGACAAACATTCTATGCAACAGAAGCCATAATAGGAAATATAAGACAAGCACATTGTAACATTAGTGGAGAAGAATGGAATACAACTGTACACGAGGTAAAAGGAAAATTAGGAAAGCTCTTCCATAATAAAACAATAGTATTTGCACCATCCTCAGGAGGGGACCTAGAAATTACAACACATAGCTTTAATTGTAGAGGAGAATTTTTCTATTGCAATACATCAGCCCTGTTTACAAATTCAACCATCCCAAATACAACCATCACACTCCCATGCAAAATAAAACAAATTATAAATATGTGGCAGGAGGTAGGACGAGCAATGTATGCCCCTCCCATTAAAGGAGAGATAACATGTAATTCAACTATCACAGGAATACTACTGACACGTGATGGAGGCAACACCACAAACGAAATCGAAACATTCAGACCTGGAGGAGGAGATATGAGGGACAATTGGAGAAGTGAATTATATAAATACAAAGTGGTAGAAATTAAGCCATTAGGAATAGCACCCACGGAGGCAAAAAGGAGAGTGGTGGAGAGAGAAAAAAGAGCAGCACTAGGAGCTGTGTTCCTTGGGTTCTTGGGAGCAGCCGGAAGCACTATGGGCGCAGCATCAATGACGCTGACGTTACAGGCCAGACAATTACTGTCGGGTATAGTGCAACAGCAAAGCAATTTGCTGAGGGCTATAGAGGCGCATCAGCATATGCTGCAACTCACAGTCTGGGGCATTAAGCAGCTCCAGGCAAGAGTCCTGGCTATAGAAAGATACCTAGGGGATCAACAGCTCCTAGGGATTTGGGGCTGCTCTGGAAAACTCATCTGCACCACCACTGTGCCTTGGAACTCTAGTTGGAGTAATAAAACTCAAAAGGAAATTTGGGATAATATGACCTGGATGCAGTGGGATAGAGAAATTAATAATTATACAAACATAATATACAGGTTGCTTGAAGACTCGCAAAACCAGCAGGAGAAAAATGAAAAAGATTTACTAGCATTGGACAAATGGCAAAATCTGTGGGGTTGGTTTCAAATATCAAGATGGCTGTGGTATATAAGAATATTCATAATGATAGTAGGAGGCTTGATAGGCTTAAGAATAGTTTTTGCTGTGCTCTCTATAGTGAATAGAGTTAGGCAGGGATACTCACCGTTATCGTTTCAGACCCTCTTCCCAAACCCGAGGGGACCCGACAGGCTCGGAGGAATCGAAGAAGAAGGTGGAGAGCAAGACAGAGACAGATCAATTCGCTTAGTGAGCGGATTCTTATCGATTGCCTGGGACGACCTACGGAGCCTGTGCCTCTTCAGCTACCGCCGATTGACAGACTTACTCTCGATTGTAGCGAGGGCGGTGGAACTTCTGGGACGCAGCAGTCTCAGGGGGCTACAGAGGGGGTGGGAAACCCTTAAGTATCTGGGAAGTCTTGTGCAGTATTGGGGTTTGGAGCTAAAGAAGAGTGCTATTAGTCTGCTTGATACCACAGCAGTAGCAGTAGCTGAAGGAACAGATAGGATATTAGAATTAATACAAAGAGTTTGGAGAGCTATCTACAACATACCTAGAAGAATAAGACAGGGCTTTGAAGCAGCTTTGCTATAAAATGGGGGGCAAGTGGTCAAAACGTAGTCAAGGGGGATGGCCTGCTGTAAGAGAAAGAATAAGACAAACTCATCCAGCAGCAGAGGGAGTAGGAGCAGCAGCAGAGGGAGTAGGAGCAGCGTCTCAAGACTTAGACAAACATGGGGCACTTACAAGCAGCAACACATCCACCAGTAATGCTGCTTGTGCCTGGCTGGAAGCGCAGGAGGAGGGAGAAGAAGTAGGCTTTCCAGTCAGACCTCAGGTACCTTTAAGACCAATGACTTATAAGGCAGCATTCGATCTCAGCTTCTTTTTAAAAGAAAAGGGGGGACTGGAAGGGTTAATTTACTCCAAGCAAAGGCAAGATATCCTTGATTTGTGGGTCTATAACACACAAGGCTTCTTCCCTGATTGGCAAAACTACACGCCAGGACCAGGGGTCAGATATCCACTGACCTTTGGATGGTGTTTCAAGCTAGTGCCAGTTGACCCAACGGAAGTGGAAGAGGCCACTGAAGGAGAGAACAACTGCCTGCTGCACCCTATGAACCTGCATGGAATGGAAGATGAAGACAGAGAAGTATTGCAGTGGAAGTTTGACATTCAACTAGCACACAAACACATGGCCCGCGAGCTACATCCGGAGTATTACAAAGACTGCTGACACAGAAGGGACTTTCCGCTGGGACTTTCCACCGGGGCGTTCCAGGAGGCGTGGACTGGGCGGGACGGGGAGTGGCTAACCCTCAGATGCTGCATATAAGCAGCTGCTTTTCGCTTGTACTGGGTCTCTCTGGGTAGACCAGATCTGAGCCTGGGAGCTCTCTGGCTATCTAGGGAACCCACTGCT
>C.ZA.98.CTSC2_AY043176_H.CF.90.056_AF005496
ATGGGTGCGAGAGCGTCAATATTAAGAGGCGGAAAATTAGATAAATGGGAAAAAATTAGGTTAAGGCCAGGGGGAAAGAAATGCTACATGTTAAAACACATAATATGGGCAAGCAGGGAGCTGGAGAGATTTGCACTTAACCCTGGTCTTTTAGAGACAAAAGAAGGCTGTAAACAAATAATAAACCAGCTACATCCAGCTCTTCAGACAGGAACAGAGGAACTCAGATCATTATACAATACAGTAGCAACTCTCTATTGTGTACATGCAGAAATAGAGGTACGAGACACCAAGGAAGCCTTAGACAAGATAGAGGAAGAACAAAACAACATCCAGCAAAAAACACAGCAGGCAAAAGCGGCTGACGGAAAGGTCAGTCAAAATTATCCTATAGTGCAGAATCTCCAAGGGCAAATGGTACACCAGGCCATATCACCTAGGACTTTGAATGCATGGGTAAAAGTAATAGAGGAGAAGGCTTTTAGCCCAGAAGTAATACCCATGTTTACAGCATTATCAGAGGGAGCCACCCCACAAGATTTAAACACCATGTTAAATACAGTGGGGGGACATCAAGCAGCCATGCAAATGTTAAAAGATACCATCAATGAGGAGGCTGCAGAATGGGACAGATTACATCCAGTACATGCAGGGCCTGTTGCACCAGGCCAAATGAGAGAACCAAGGGGAAGTGACATAGCAGGAACTACTAGTACCCTTCAGGAACAAATAGCATGGATGACAGCTAACCCACCTATTCCAGTAGGAGACATCTATAAAAGATGGATAATTCTGGGGTTAAATAAAATAGTAAGAATGTATAGCCCTGTCAGCATTTTGGACATAAGACAAGGGCCAAAGGAACCCTTTAGAGACTATGTAGACCGGTTCTTTAAAACTTTAAGAGCTGAACAAGCTACACAAGATGTAAAAAATTGGATGACAGAAACCTTGTTGGTCCAAAATGCGAACCCAGATTGTAAAACCATTTTAAGAGCATTAGGACCAGGGGCTTCATTAGAAGAAATGATGACAGCATGCCAGGGAGTAGGAGGACCTGGCCACAAAGCAAGAGTGTTGGCTGAGGCAATGAGCCAAGCAAACAATATAAACATAATGATGCAAAAAAGCAATTTTAAAGGCCCTAAAAGAATTGTTAAATGTTTCAATTGTGGCAAGGAAGGGCACATAGCCAGAAATTGCAGGGCCCCTAGAAAAAAGGGCTGTTGGAAATGTGGAAAGGAAGGACATCAAATGAAAGACTGTATTGAAAGGCAGGCTAATTTTTTAGGGAAGATTTGGCCTTCCCACAAGGGGAGGCCAGGAAATTTCCTTCAGAACAGGCCAGAGCCAACAGCCCCACCAGCAGAGAGCTTCAAATTCGAGGAGACAACCCCTGCTCCGAAGCAGGAGACGAAAGACAGGGAACCTTTAACTTCCCTCAAATCACTCTTTGGCAGCGACCCCTTGTCTCAATAAAAGTAGGGGGCGAAATAAAGGAGGCTCTCTTAGACACAGGAGCAGATGATACAGTATTAGAAGAAATGAGTTTGCCAGGAAAATGGAAACCAAAAATGATAGGAGGAATTGGAGGTTTTATTAAAGTAAGACAATATGATCAAATACTCATAGAAATTTGTGGAAAAAAGGCTATAGGTACAGTATTAGTGGGACCTCCAATTAGTCCCATTGAAACTGTACCAGTAAAATTAAAGCCAGGAATGGATGGCCCAAAGGTTAAACAATGGCCATTGACAGAAGAAAAAATAAAAGCATTAACAGCAATTTGTGAAGAAATGGAGAAGGAAGGAAAAATTACAAAAATTGGGCCTGAAAATCCATATAACACTCCAGTATTTGCCATAAAAAAGAAAGACAGTACTAAGTGGAGAAAATTAGTAGACTTCAGAGAACTCAATAAAAGAACTCAAGACTTTTGGGAAGTTCAGTTAGGAATACCACACCCAGCAGGGCTAAAAAAGAAAAAATCAGTGACAGTACTAGATGTGGGGGATGCATATTTTTCAGTTCCTTTAGATGAAAACTTCAGAAAATATACTGCATTCACCATACCTAGTATAAACAATGAAACACCAGGGATTAGATATCAATATAATGTGCTTCCACAGGGATGGAAAGGATCACCAGCAATATTCCAGAGTAGCATGACAAAAATCTTAGAGCCCTTTAGGGCACAAAACCCAGGAATAGTCATCTATCAATACATGGATGACTTGTATGTAGGATCTGACTTAGAGATAGGGCAACATAGAGCAAAAATAGAAGAGTTAAGAGAGCATTTATTAAGGTGGGGATTTACCACACCAGACAAGAAACATCAGAAAGAACCCCCATTCCTTTGGATGGGGTATGAACTCCATCCTGACAAGTGGACAGTACAGCCTATAGAGCTGCCAGAAAAGGATAGCTGGACTGTCAATGATATACAGAAGTTAGTGGGAAAATTAAACTGGGCAAGTCAGATTTACTCAGGGATTAAAGTAAGGCAGCTTTGTAAACTCATCAGGGGGGCCAAAGCACTAACAGACATAGTACCACTAACTGAAGAAGCAGAATTAGAATTGGCAGAGAACAGGGAAATTCTAAAAGAACCAGTACATGGAGTATATTATGACCCATCAAAAGACTTGATAGCTGAAATACAGAAACAGGGGCATGACCAATGGACATATCAAATTTACCAAGAACCATTCAAAAATCTGAAAACAGGGAAGTATGCAAAAATGAGGACTGCCCACACTAATGATGTAAAACAGTTAACAGAGGCAGTGCAAAAAATAGCCAGAGAAAGTATAGTAATATGGGGAAGGACTCCTAAATTTAGACTACCCATCCAAAAAGAAACATGGGAGACATGGTGGACAGACTATTGGCAAGCCACCTGGATTCCTGAGTGGGAATTTGTTAATACCCCTCCCCTAGTAAAATTATGGTACCAGCTGGAGAAAGAACCCATAGCAGGAGTAGAAACTTACTATGTAGATGGAGCAGCTAACAGGGAAACTAAAATGGGAAAAGCAGGGTACGTTACGGACAGAGGAGGGCAGAAAATTGTTTCTCTAACTGAAACAACAAATCAGAAGGCTGAATTACAAGCAATCCAGCTAGCTCTGCAAGATTCAGGATCTGAAGTAAACATAGTAACAGACTCACAGTATGCATTAGGAATCATTCAAGCACAACCAGATAAGAGTGAGTCAGAGTTAGTCAACCAAATAATAGAACAGTTAATAAAAAAGGAAAGGGTCTACCTGGCATGGGTACCAGCACATAAAGGAATTGGAGGAAATGAACAAATAGATAAATTAGTAAGTAAGGGAATCAGGAAAGTGCTGTTTCTAGATGGAATAGATAAGGCTCAAGAAGATCATGAAAGGTATCACAGCAATTGGAGAGCAATGGCTAATGAGTTTAATCTGCCACCCATAGTAGCAAAAGAAATAGTAGCTAGCTGTGATAAATGTCAGCTAAAAGGGGAAGCCATACATGGACAAGTAGACTGCAACCCAGGGATATGGCAATTAGATTGTACACATTTAGAAGGGAAAATCATCCTGGTAGCAGTCCATGTAGCCAGTGGCTACATGGAAGCAGAGGTTATCCCAGAAGAAACAGGACAAGAAACAGCATACTATATACTAAAACTAGCAGGAAGATGGCCAGTCAAAGTAATACATACAGACAATGGCAGGAATTTCACCAGTAATGCAGTTAAGGCAGCCTGTTGGTGGGCAGGTATCCAACAGGAATTTGGGATTCCCTACAATCCCCAAAGTCAGGGAGTAGTAGAATCTATGAATAAAGAATTAAAGAAGATCATAGGGCAGGTAAGAGACCAAGCTGAACACCTTAAGACAGCAGTACAAATGGCAGTATTCATACACAATTTTAAAAGAAAAGGGGGGATTGGGGGGTACAGTGCAGGGGAAAGGATAATAGACATAATAGCAACAGACATACAAACTACAGAATTACAAAAACAAATTACAAAAATTCAAAATTTTCGGGTTTATTACAGAGACAGCAGAGACCCTATTTGGAAAGGACCAGCCAAACTCCTCTGGAAAGGTGAAGGGGCAGTAGTAATACAAGATAATAGTGACATAAAGGTAGTACCAAGGAGGAAGGCAAAAATCATTAGGGACTATGGAAAACAGATGGCAGGTGCTGATTGTGTGGCAGGTAGACAGGATGAAGATTAGAACATGGAATAGTTTAGTAAAGCACCATATGTATACTTCAAAGAAAGCTAGTGGATGGGTTTACAGACACCATTATGAAAGTAGAAATCCAAAAATAAGTTCAGAAGTACACATCCCATTAGGAGAAGCTAAATTAGTAATAAAAACATACTGGGGGTTGCAAACAGGAGAAAGAGAATGGCATTTGGGTCATGGAGTCTCCATAGAATGGAGATGGGAAAGTTATAGCACACAAGTAGACCCTGGCCTGGCAGACCAGCTAATTCATATGCATTATTTTGATTGTTTTACAGACTCTGCCATAAGGAAAGCCATATTAGGACACATAGTTATTCATAGGTGTGAATATCAAGCAGGACATAATAAGGTAGGATCTCTACAATACTTGGCACTGACAGCATTGATAAAACCAAAAAAGATAAAGCCACCTCTGCCTAGTGTTAGGAAATTAGTAGAGGATAGATGGAACAACCCCCAGAAGACCAGGGGCCGCAGAGGGAACCATACAATGAATGGACACTAGAGATTCTGGAGGAACTTAAGCAGGAAGCTGTCAGACACTTTCCTAGACCATGGCTTCATAGCTTAGGACAATACATCTATGAAACATATGGGGATACTTGGACAGGAGTCGAAGCTCTATTAAGAATACTGCAACAACTACTGTTTATCCATTTCAGAATTGGGTGCCAGCATAGCAGAATAGGCATTTTGCGACAGAGAAGAGCAAGAAATGGAGCCAGTAGATCCTAACCTAGAGCCCTGGAACCACCCAGGAAGTCAGCCTAAAACTGCTTGTAATCCATGTTATTGTAAAAAATGTAGCTACCACTGTCTAGTTTGCTTTCAGAAAAAAGGCTTAGGCATTTCCTATGGCAGGAAGAAGCGGAGACAACGACGAACAGCTCCTCCAAGCAGTGAGGATCATCAAAATCCTATATCAAAGCAGTAAGTATATTGTAATGGTAGATTTACTAATAGAAATAGATTATAGGTTAGGAGTAGGAGCACTCATAGTAGCACTAATCATAACAATAATTGTGTGGACCATAGCATATCTAGAATATAGGAAATTGCAAAGACAAAGAAAAATAGACCGGTTAATTGAAAGAATTAGGGAAAGGGCAGAAGACAGTGGCAATGAGAGTGAGGGGGATGCAGAAGAATTATCCACGATGGTGGATATGGGGAATCTTAGGCTTTTGGATGTTAATGATTTATAATGTGGGGGGAAATTTGTGGGTCACAGTCTATTATGGGGTACCTGTGTGGAGGGAAGCAAAAACCACTCTATTCTGTGCATCAGACGCTAAAGCATATGAAAGGGAAGTGCATAATGTCTGGGCTACACATGCCTGTGTACCCACAGACCCCAACCCACAAGAAGTAGTTTTGGGAAATGTAACAGAAAATTTTAACATGTGGAAAAATGACATGGTGGATCAGATGCATGAGGATATAATCAGTTTATGGGATGAAAGCCTAAAGCCATGTGTAAAGTTGACCCCACTCTGTGTCACTTTAAATTGCAGCAATGAGAGTAGACTTAGTAATAGTAGCCTTAATGAAGAAATAAAAAATTGCTCTTTCAATACAACCACAGAACTAAGAGACAAGAAACAACAAGTGTATGCACTTTTTTATAAGCTTGATGTAGTACCACTTAATGATCATAATAACAGCAGCTATAGATTAATAAATTGTAATACCTCAGCCATAACACAAGCCTGTCCAAAGGTCTCTTTTGACCCAATTCCTATACATTATTGTGCTCCAGCTGGTTATGCGATTCTAAAGTGTAATAACAAGACATTCAATGGGACAGGACCATGCACTAATGTCAGCACAGTACAATGTACACATGGAATTAAGCCAGTGATATCAACTCAACTACTGTTAAATGGTAGCCTAGCAGAAGGAGAGATAATAATTAGATCTGAAAATCTGACAAACAATCTCAAAACAATAATTGTACATCTTAAGGAAGCAATAGAAATTAATTGTACAAGACCTGGCAATAATACAAGAAAAAGTATAAGGATAGGACCAGGACAAGCCTTCTATGCAACAGGAGACATAATAGGAGACATAAGACAAGCACATTGTAACATTAGTGAAGAAAATTGGAATAAAACGTTACAAGAGGTAGGTAAAATGTTAGAAAAACACTTCCCTAATAAAACAATAAAATTTGCACCATCCTCAGGAGGGGACTTAGAAATTACAACACATAGCTTTAATTGTGGAGGAGAATTTTTCTATTGTAATACATCAAACCTGTTTAATAGTACATACAATAGTACATACAATAGTACCCAGCCTGGAAATAAAACCATCACCCTCCAATGCAGAATAAAACAATTTATAAACATGTGGCAGGAGGTAGGACGAGCAATGTATGCCCCTCCCATTGCAGGAAACATAACATGTAAATCAAACATCACAGGACTACTATTGACACGTGATGGCGGCATAAACAGCTCAGAGAACACAGAGACATTCAGACCTGGAGGAGGAGATATGAGAGACAATTGGAGGAGTGAATTATATAAATACAAAGTGGTAGAAATTAAGCCATTGGGAATAGCACCCACTAAGGCAAAAAGAAGAGTGGTAGAGAGAGAAAAAAGAGCAGTAGGGACAATAGGAGCTATGTTCCTTGGGTTCTTGGGAGCAGCCGGAAGCACTATGGGCGCGGCGTCGATGGCGCTGACGGTACAGGCCAGACAAGTATTGTCTGGTATAGTGCAACAGCAAAGCAATTTGCTGAGGGCCATAGAGGCGCAACAGCATATGTTGCAACTCACGGTCTGGGGCATTAAGCAGCTCCAGACAAGAGTCCTGGCTGTAGAAAAATACCTAAAGGATCAACAGCTCCTAGGGATTTGGGGCTGCTCTGGAAAACTCATCTGCCCTACTGCAGTACCTTGGAACTCCAGTTGGAGTAATAAATCTCAAACAGATATTTGGGATAACATGACCTGGATGCAGTGGGATAAAGAGATTAGTAATTACACAAACACAATATACAGGTTGCTTGAAGAATCGCAAAACCAGCAGGAAAGAAATGAAAAAGATTTATTAGCATTGAACAGTTGGGGAAATCTGTGGAATTGGTTTGACATATCAAATTGGCTGTGGTATATAAAAATATTCATAATGATAGTAGGAGGCTTGATAGGTTTGAGAATAATTTTTGCTGTACTCTCTATAGTGAATAGAGTTAGGCAGGGATACTCACCTTTGTCGTTCCAGACCCTTTCCCCGAACCCAAGGGGACCCGACAGGCTCGGAAGAATCGAAGAAGAAGGTGGAGAGCAAGACAAAGACAGATCAATTCGATTAGTGAGCGGATTCTTAGCGATTGCCTGGGACGATCTGCGGAGCCTGTGCCTCTTCAGCTACCACCGATTGAGAGACTTCATATTGGTTGCAGCGAGAGCGGCGGGACTTCTGGGGCGCAGCAGTCTCACGGGACTACAGAAGGGGTGGGACGTCCTTAAATATCTGGGAAGTCTTGTGCAGTATTGGGTTCTGGAACTAAAAGGGAGTGCCATTAGCCTGTTTGATACTGTAGCAATAGCAGTAGCTGAAGGAACAGATAGGATTATACAATTAGTACAAAGAATTTGTAGAGCTATCCTCAACATACCTACAAGAGTAAGACAGGGCTTTGAAGCAGCTTTGCTATAAATGGGGGGCAAGTTATCAAAAAGCAGTATAGTTGGGTGGCCTGAGGTAAGAGAAAGACTAAGAAGAGCTGGATCAGCAGCAGAGGGAGTAGGGGCAGCATCTCAAGACTTAGATAGACATGGAGCGCTTACAAGCAGTAACACACCTGCCACTAATGCTGCTTGTGCCCAGCTGGAAGCACAAGAGGAGGAAGAAGAAGTAGGCTTTCCAGTTAGACCTCAAGTGCCTTTAAGACCCATGACTTTTAAGGGAGCATTTGATCTCAGCTTCTTTTTAAAAGAAAAGGGGGGACTGGATGGGTTAATTTACTCTAAGAAAAGACATGAAATCCTTGATTTGTGGGTCTATAACACGCAAGGCTACTTCCCTGACTGGCAAAACTACACACCGGGACCAGGGGTCAGATATCCACTGACCTTTGGATGGTGCTACAAGCTAGTGCCAGTTGACCCAAGGAAAGTAGAAGAGGCCAACGAGGGAGAAAACAATTGCTTGCTGCATCCTATGCACCAACATGGAATGGATGATGAGGACAGAGAAGTATTAATATGGAAGTTTGACAGCAGCCTAGCACGCAGACACATGGCCCGCGAGATGCATCCGGAGTATTACAAAGACTGCTGACACAGAAGGGACTTTCCGCTGGGACTTTCCACTGCAGGCGTGGCCGGGGCGGGACGGGGGAGTGGTCAACCCTCAGATGCTGCATATAAGCAGCCGCTTTCCGCTTGTACTGGGTCTCTCTAGGTAGACCAGATCCGAGCCTGGGAGCTCTCTGGCTATCTGGGGAACCCACTGCTTAAGCCTCAATAAAGCTTGCCTTGAGTGCA
>C.ZA.04.SK140B1_AY901973_J.SE.93.SE7887_AF082394
TCTGTTGTGTGACTCTGGTAACTAGAGATCCCTCAGACCATTTTGGTAGTGTGGAAAATCTCTAGCAGTGGCGCCCGAACAGGGACGCGAAAACGAAAGTGAGACCAGAGAAGATCTCTCGACGCAGGACTCGGCTTGCTGAAAGTGCACTCGGCAAGAGGCGAGAGCGGCGACTGGTGAGTACGCCGAAATTTTATTTGACTAGCGGAGGCTAGAAGGAGAGAGATGGGTGCGAGAGCGTCAGTATTAAGAGGCGAAAAATTAGATCAATGGGAAAAAATTAGTTTAAGGCCGGGGGGAAAGAAACGCTATATGCTAAAACATTTAGTATGGGCAAGCAGGGAGCTGGAACGATTTGCACTTAACCCTGGTCTTTTAGAGACAACAGAAGGCTGTAAACAAATAATGAAACAGCTACAACCAGCTCTCCAGACAGGAACAGAGGAACTTAAGTCATTATACAACACAGTAGCAACTCTCTATTGTGTACATGCACATATAGAAGTGCGAGACACCAAGGAAGCCTTAGATAAGATAGAAGAAGAACAGAACAAAAGTCAGCAAAACACACAGCAGACAAAAGAAGCTGACAGGAAGATTAGTCAAAATTATCCTATAGTGCAGAATCTTCAAGGGCAAATGGTACACCAAGCCATATCACCTAGAACTTTAAATGCATGGGTAAAAGTGATAGAGGAGAAGGCTTTTAGCCCAGAAGTAATACCCATGTTTACAGCATTATCAGAAGGAGCCACCCCACAAGATTTAAATACCATGTTAAATACAGTGGGGGGACATCAAGCAGCCATGCAAATGTTAAAAGATACCATCAATGAGGAGGCTGCAGAATGGGACAGACTACATCCAGTACATGCAGGGCCTGTTGCACCAGGCCAAATGAGAGAACCAAGGGGAAGTGACATAGCAGGAACTACTAGTACCCTTCAGGAACAAGTAGCATGGATAACAGGCAACCCACCTATTCCAGTGGGAGAAATCTATAAAAGATGGATAATTCTGGGGTTAAATAAAATAGTAAGAATGTATAGCCCTGTCAGCATTTTGGACATAAAACAAGGACCAAAGGAACCCTTTAGAGATTATGTAGATCGGTTCTTTAAAACTTTAAGAGCTGAACAAGCTACACAAGATGTAAAAAATTGGATGACAGACACCTTGTTGGTCCAAAATGCGAACCCAGATTGTAAGATCATTTTAAAGGGATTAGGATCAGGGGCTACATTAGAAGAAATGATGACAGCATGTCAGGGAGTGGGAGGACCCGGCCACAAAGCAAGGGTGTTGGCTGAGGCAATGAGCCAAGCAAACAACATAAACATAATGATGCAGAAAGGCAATTTTAAAGGCCCTAAAAGAATCATTAAATGTTTCAACTGTGGCAAGGAAGGGCACCTAGCCAGAAATTGCAGGGCCCCTAGAAAAAAGGGCTGTTGGAAATGTGGAAGGGAAGGACACCAAATGAAAGACTGTACTGAAAGGCAGGCTAATTTTTTAGGGAAAGTTTGGCCTTCCCACAAGGGGGGGAGGCCAGGGAATTTCCTTCAGAACAGACCAGAGCCATCAGCCCCACCAGCAGAGAGCTTCAGGTTCGAGGAGGCTCCGAAGCAGGAGCCGAAAGACAGGGAACCTTTAACTTCCCTCAAATCACTCTTTGGCAACGACCCCTTGTCTCAATAAAAGTAGGGGGACAGATAAAAGAGGCTCTTTTAGACACAGGAGCAGATGATACAGTATTAGAAGAAATAAATTTGCCAGGAAAATGGAAACCAAAAATGATAGGAGGAATTGGAGGTTTTATCAAAGTAAGACAATATGATGAAGTACTTATAGAAATTTGTGGAAAAAAGACTATAGGTACAGTACTGGTAGGACCTACACCTGTCAACATAATTGGGAGAAACATGTTGACTCAGCTTGGATGCACACTAAATTTTCCAATTAGTCCCATTGAAACTGTACCGGTAAAATTAAAGCCAGGAATGGATGGCCCAAAGGTTAAACAATGGCCATTGACAGAAGAGAAAATAAAAGCATTAACAGCAATTTGTGAAGACATGGAGAAGGAAGGAAAAATTACAAAAATTGGGCCTGAAAATCCATATAACACCCCAGTATTTGCCATAAGAAGGAAGGACAGTACTAAGTGGAGAAAATTAGTAGATTTCAGGGAACTCAATAAAAGAACTCAAGACTTTTGGGAAGTTCAATTAGGAATACCACACCCAGCAGGGTTAAAAAAGAAAAGATCAGTGACAGTACTAGATGTGGGGGATGCATATTTTTCAGTTCCTTTAGATGAAAACTTCAGGAAGTATACTGCATTCACCATACCTAGTATAAACAATGAAACACCAGGGATTAGATACCAATATAATGTGCTTCCACAGGGATGGAAAGGATCACCAGCAATATTCCAGAGTAGCATGACAAAAATCCTAGAGCCCTTTAGAGCACAAAATCCAGAACTAGTCATCTATCAATATATGGATGACTTGTATGTAGGATCTGACTTAGAAATAGGGCAACATAGAGCAAAGATAGAGGAATTAAGAGAACATCTATTAAAGTGGGGATTTACCACACCAGACAAAAAACATCAGAAAGAACCCCCATTTCTTTGGATGGGGTATGAACTCCATCCTGACAAATGGACAGTACAGCCTATAGAGCTACCAGAAAAGGATAGCTGGACTGTCAATGATATACAAAAGTTAGTGGGAAAATTAAACTGGGCAAGTCAGATTTACAAAGGAATTAAAGTAAAGCAACTTTGTAAACTCCTTAGGGGGGCCAAAGCACTAACAGACATAGTACCACTGACTGAAGAAGCAGAATTAGAGTTGGCAGAAAACAGAGAAATTCTAAGAGAACCAGTACATGGAGTATATTATGATCCATCAAAAGAATTGATAGCTGAAATACAGAAACAGGGGCATGATCAGTGGACATATCAAATTTACCAGGAACCATTCAAAAATTTGAAGACAGGAAAGTATACAAAAATGAGGACTGCCCACACCAATGATGTAAGGCAGTTAACAGAGGCAGTGCAAAAAATAGCCATGGAAAGCATAGTAATATGGGGAAAGACTCCTAAATTTAGACTACCCATCCAAAAGGAAACATGGGAGGCATGGTGGACAGACTACTGGCAAGCCACCTGGATTCCTGAGTGGGAGTTTGTTAATACTCCTCCCCTAGTAAAATTATGGTACCAGCTGGAGAAAGAACCCATAGCAGGAGTAGAAACTTTCTATGTAGATGGAGCAGCTAATAGGGAAACTAAGATAGGGAAAGCAGGGTATGTTACTGATAGAGGAAGGCAAAAAATTGTTTCCTTCACTGAAACAACAAATCAGAAGACTGAATTACAAGCAATTCAGCTAGCTTTGCAAGATTCAGGATCAGAAGTAAACATAGTAACAGATTCACAGTATGCATTAGGAATCATTCAAGCACAACCAGATAAGAGTGAATCAGAGTTAGTCAATCAAATAATAGAACAGTTAATAAATAAGGAAAGGGTCTACCTGTCATGGGTACCAGCACATAAAGGAATTGGAGGAAACGAACAAGTAGATAAATTAGTAAGTACTGGAATCAGGAAAGTGCTGTTCCTAGATGGAATAGATAAGGCTCAAGAAGAGCATGAAAAGTATCACAACAATTGGAGAGCAATGGCTAGTGATTTTAATCTGCCACCCATAGTAGCAAAAGAAATAGTAGCTAGCTGTGATAAATGTCAACTAAAAGGGGAAGCCATGCATGGACAAGTAGACTGTAGTCCAGGGATATGGCAATTAGATTGTACACATTTAGAAGGAAAAATCATTCTGGTAGCAGTCCATGTAGCCAGTGGCTACATAGAGGCAGAGGTCATCCCAGCAGAAACAGGACAAGAAACAGCATACTACATATTAAAATTAGCAGGAAGATGGCCAGTCAAAGTAATACATACAGACAATGGTAGTAATTTCACCAGTGCTGCAGTTAAGGCAGCCTGTTGGTGGGCAGGTATCAAACAGGAATTTGGGATTCCCTACAATCCCCAAAGTCAAGGAGTAGTAGAATCCATGAATAAAGAATTAAAGAAAATTATAGGACAGGTAAGAGATCAAGCTGAGCACCTTAAGACAGCAGTACAAATGGCAGTATTCATTCACAATTTTAAAAGAAAAGGGGGGATTGGGGACTACTGTGCAGGGGAAAGAATAATAGACATAATAGCAACAGACATACAAACTAAAGAATTACAAAAACAAATTATAAAAATTCAAAATTTTCGGGTTTATTACAGAGACAGCAGAGACCCTATTTGGAAAGGACCAGCCAAGCTACTCTGGAAAGGTGAAGGGGCAGTAGTAATACAAGATAACAGTGACATAAAGGTAGTACCAAGAAGAAAAGTAAAAATCATTAAAGATTATGGAAGACAGATGGCAGGCGCTGATTGTGTGGCAGGTAGACAGGATGAGGATTAGAACATGGAATAGCTTAGTAAAACACCATATGTATGTTTCAAGGAAAACTAGTGGATGGTGTTACAGACATCATTATCAAAGCACACATCCAAAAGTAAGTTCAGAAGTACACATACCATTAGGGGAAGCTAGATTAGTAATAATAACATATTGGGGGTTGCAAACAGGAGAAAGAGATTGGCATTTGGGTCATGGAGTCTCCATAGAGTGGAGATTGAGAAAATATAGCACACAGGTAGATCCTGGCCTGGCAGACCAGCTAATTCATATGCATTATTTTGATTGTTTTGCAGACTCCGCCATAAGACAAGCAATATTAGGACACATAGTTTTTCCTAGGTGTGATTATCAAGCAGGACATAATAAGGTAGGATCTCTGCAATACTTGGCACTGACAGCATTGATAAAACCAAAAAGGATAAAGCCACCTCTGCCTAGCATTCAGAAATTAGTAGAGGATAGATGGAACAACTCCCAGAAGACCAGGGGCCGCAGAGGGAACCATACAATGAATGGGCACTAGAAATTCTAGAGGAACTCAAGCAGGAAGCTGTCAGACACTTTCCTAGACCATGGCTCCATATCTTAGGACAGTATATCTATGATACCTATGGAGATACTTGGACAGGAGTTGAAGCTCTAATAAGAACATTACAACAGCTACTGTTTATGCATTTCAGAATTGGGTGCCAGCATAGCAGAATAGGAGCCACGCCACAAAGAAGAGGGAGGAATGGAGCCAGTAGATCCTAACAGAGAGCCCTGGAATCATCCAGGAAGTCAGCCTAAAACTGCTTGTACTAATTGTTATTGTAAAAACTGTAGCTATCACTGTCTAGTTTGCTTTCAGACAAAAGGCTTAGGCATTTCCTATGGCAGGAAGAAGCGGAGACAGCGACGAAGCACTCCTCCAAGCAGTGAGGATCATCAAAATCTTATATCAAAGCAGTAAGTATATGTAATGTCAGAGTTACTAGCACAAGTAGATTATAGATTAGGAGTGGGAGCACTGATAGTAGCATTAATTATAGCAATAGTTGTGTGGATCATAGCATATTTAGAATATAGAAAATTGTTAAAACAAAGGAAGATAGACTGGTTAATTAAAAGAATTAGGGAAAGAGCAGAAGACAGTGGCAATGAGAGTGATGGGGATACTGAGGAATTGTCAACAATGGTGGATATGGGGAATCTTAGGCTTTTGGATGCTATTTAGCTGCAATGTGGTGGGAAACTTGTGGGTCACAGTCTATTATGGGGTACCTGTGTGGCGAGAAGCAAAAACTACTTTATTCTGTGCATCAGATGCTAAAGCATATGAGAAAGAAGTGCATAATGTTTGGGCTACACATGCCTGTGTACCCACAGACCCCAACCCACAAGAAATAAATTTGGGAAATGTAACAGAAAATTTTAATATGTGGAAAAATGATATGGTGGATCAGATGCATGAGGATGTAATCAGTTTATGGGACCAAAGCCTAAAGCCATGTGTAAAGTTGACCCCACTTTGTGTCACTTTAAACTGCACAGATACCAAGAATGGTACCACTCATGATAATAAAACCATAGGTGCAGAAATGAAAAATTGCTCTTTCAATGTAACCACAGAGTTAAGAGATAAGAAAAAGCAAGCGTATGCACTTTTTTACAAACTAGATATAGTACAACTTGATAAGAATAATAATGAGTATAGATTAATAAATTGTAATACCTCAACCATGACACAAGCCTGTCCAAAGGTCTCTTTTGACCCAATTCCCATTCATTATTGTGCTCCAGCTGGATATGCGATTCTAAAGTGTAATAATAAGACATTTAATGGGACAGGACCATGCAATAATGTCAGTACAGTACAATGTACACATGGGATTAAGCCAGTAGTTTCAACTCAACTACTGTTAAATGGTAGCTTAGCAGAAGGAGAGATAGTAATTAGATCTGAAAATCTGACAAACAATGTCAAAACAATAATAGTACATCTTAATGAATCTGTAGAAATTGTGTGTGTAAGACCCAACAATAATACAAGAAAAAGCATAAGGATAGGACCAGGACAAGCATTTTATGCAACAGGAGACATAATAGGAGATCCAAGACAAGCACATTGTAACATTAGCAGAGATAAATGGAATAAAACTTTACAAGAGGTAGGTAAAAAATTAGTAGGATACTTCCCCGGTAAAACAATAGAATTTGCACCACCTTCAGGAGGGGACCTAGAAATTATGACACATAGCTTTAATTGTGGGGGAGAATTTTTCTATTGTTATACAACACAGCTGTTTAATAGTACATACAATAGTACATACAGGCCTAATGGTACAGAAAGTAATTCAAACATCACACTCCCATGCAGAATAAAGCAAGTTATAAACATGTGGCAGCAGGTAGGACGAGCAATGTATGCTCCTCCCATTGCAGGAAACATAACATGTAAATCAAATATCACAGGATTACTATTGGTGCGTGATGGAGGAATAAATAACAGTACCAAAGAGACATTCAGACCTGGAGGAGGAGATATGAAGGACAATTGGAGAAGTGAATTATACAAATATAAAGTAGTAGAAATTAAACCATTGGGAATAGCACCTACTGAGGCAAAAAGGAGAGTGGTGGAGAGGGAAAAAAGAGCAGTGGGAATAGGAGCTGTGTTCCTTGGGTTCTTGGGAGCAGCAGGAAGCACTATGGGCGCGGCGTCAATAACGCTGACGGTACAGGCCAGACAATTGTTGTCTGGTATAGTGCAACAGCAAAGCAATTTGCTGAGGGCCATAGAGGCGCAACAGCATATGTTGCAACTCACGGTCTGGGGCATTAAGCAGCTCCAGACAAGAGTATTGGCCATAGAAAGATACCTAAAGGATCAACAGCTCCTAGGGATTTGGGGCTGCTCTGGAAAACTCATCTGCACCACTGCCGTGCCTTGGAACTCCAGTTGGAGTAATAGATCTAAAGAAGATATTTGGAATAACACGACCTGGATGCAGTGGGATAGAGAAATTAGTAATTACACAGACACAATATACAGGTTACTTGAAAAATCGCAAACCCAGCAGGAGGAAAATGAAAAGGATTTATTAGCATTAGACAAATGGCAAAATCTGTGGAATTGGTTTGACATATCAAATTGGCTGTGGTATATAAAAATATTCATAATGATAGTAGGAGGCTTGATAGGTTTGAGAATAATTTTTGCTGTGCTTTCTATAGTGAATAGAGTCAGGCAGGGATACTCACCTCTGTCGTTTCAGACCCTTATCCCAAACCCGAGGGGACCCGACAGGCTCGGAAGAATCGAAGAAGAAGGTGGAGAGCAAGACAGAGACAGATCCATTCGATTAGTGAGCGGATTCTTAGCACTTGCTTGGGACGACCTGCGGAGCCTGTGCCTTTTCAGCTACCACCACTTGAGAGACTTCATATTAGTTGTAGCGAGGACTGTGGAACTTCTGGGACGCAGCAGTCTCAAGGGACTACGGAGGGGGTGGGAAGCCCTTAAATATCTGGGAAGTCTTGTGCAGTATTGGGGTCTGGAACTAAAAAAGAGTGCTGTTAGTCTGCTTGATAACATAGCAATAGCAGTAGCTGAAGGAACAGATAGGATTATAGAAGTACTACAAGGAATTGGTAGGGCTATCTACCAAATACCCAGAAGAATAAGACAGGGCTTTGAAGCAGCTTTGCAATAAAATGGGGGGCAAGTGGTCAAAAAGCAGTATAGTTGGATGGCCTGAAGTGAGAGAAAGAATAAGAAGAACTAGGTTAACAGAAGAAGGAGTAGGAGCAGCAGAGGGAGTAGGAGCAGCGTCTCAAGACTTAGATAGACATGGAGCACTTACAAGCAGCAACACAGTCACCAATAATGCTGATTGTGCCTGGCTGGAAGCACAAGAGGAGGA
>C.ZA.03.03ZAPS088MB1_DQ275651_K.CM.96.MP535_AJ249239
TCTGTTGTGTGGCTCTGGTAACTAGAGATCCCTCAGACCCTTTTGGGTAGTGTGGAAAATCTCTAGCAGTGGCGCCCGAACAGGGACCCGAAAGCGAAAGTAAGACCAGAGGAGATCTCTCGACGCAGGACTCGGCTTGCTGAAGTGCACTCGGCAAGAGGCGAGAGCGGCGGCTGGTGAGTACGCCAATTTTTATTTTGACTAGCGGAGGCTAGAAGGAGAGAGATGGGTGCGAGAGCGTCAGTATTAAGAGGGAAAAAATTAGATACATGGGAAAAAATTAGGTTAAGGCCAGGGGGAAAGAAATGCTATATGTTAAAACACATAGTATGGGCAAGCAGGGAGCTGGAAAGATTTGCACTTAACCCTGGCCTTTTAGAAACATCAGAAGGCTGTAAACAATTAATGAAACAGCTACAACCAGCTCTTCAGACAGGAACAGAGGAACTTAGATCATTATTCAACACATTAGCAGTTCTCTATTGCGTACATGAAAGGATAGAGGTACGAGACACCAAGGAAGCCTTAGACAAGATAGAGGAAGAACAAAACAAAAGTCAGCAAAAAACACAGCAGGCAAAAGCGGCTGACGAAAAGGTCAGTCAAAATTATCCTATAGTGCAGAATCTTCAAGGGCAAATGGTACATCAAGCCATATCACCTAGAACCTTGAATGCATGGGTAAAAGTAATAGAGGAGAAGGCTTTTAGCCCAGAGGTAATACCCATGTTTACAGCATTATCAGAAGGAGCCACCCCACAAGATTTAAACACCATGCTAAATACGGTGGGGGGGCATCAAGCAGCCATGCAAATGTTAAAAGATACCATCAATGAAGAGGCTGCAGAATGGGATAGATTACATCCAGTACATGCGGGGCCCATTGCACCAGGCCAATTGAGAGAACCAAGGGGAAGTGACATAGCAGGAACTACTAGTACCCTTCAGGAACAAATAGCATGGATGACAAATAACCCACCTGTTCCAGTAGGAGACATCTATAAAAGATGGATAATTCTAGGGTTAAATAAAATAGTGAGAATGTATAGCCCTGTCAGCATTTTGGACATAAGACAAGGGCCAAAGGAACCCTTTAGAGACTATGTAGACCGGTTCTTTAAAACTTTAAGAGCTGAACAAGCTACACAAGATGTAAAAAATTGGATGACAGACACCTTGTTGGTCCAAAATGCGAACCCAGATTGTAAGACCATTTTAAGAGCATTAGGACCAGGGGCTACATTAGAAGAAATGATGACAGCATGTCAGGGAGTGGGAGGGCCTAGCCACAAAGCAAGAGTGCTGGCTGAGGCAATGAGCCAAACAAACAGTGTAAATATAATGATGCAGAGAAGCAATTTTAAAGGCCCTAAAAGAACTGTTAAATGTTTCAACTGTGGCAAGGAAGGGCACATAGCCAGAAATTGCAGAGCCCCTAGGAAAAAAGGCTGCTGGAAATGTGGAAAGGAAGGACACCAAATGAAAGACTGTACTGAGAGGCAGGCTAATTTTTTAGGGAAGATTTGGCCTTCCCACAAGGGGAGGCCAGGGAATTTCCTACAGAGCAGACCAGAGCCATCAGCCCCACCAGCAGAGAGCTTCAGGTTCGAGGAGACAACCCCCGCTCCGAAGCAGGAGCCGAAGGACAGGGAACACTTAACTTCCCTCAAATCACTCTTTGGCAGCGACCCCTTGTCTCAATAAGAGTAGGGGGTCAGGTAAAGGAGGCTCTATTAGACACAGGAGCAGATGATACAGTATTAGAAGAAATAAATTTGCCAGGAAAATGGAAACCAAAAATGATAGGAGGAATTGGAGGTTTTATCAAAGTGAGGCAGTATGATCAAATACTTATAGAAATTTGTGGGAAAAAAGCTATAGGTACAGTATTAGTAGGGCCCACACCTGTCAACATAATTGGAAGAAACATGTTGACTCAGCTTGGATGCACATTAAATTTTCCAATTAGTCCCATTGAAACTGTACCAGTAAAATTGAAGCCAGGAATGGATGGCCCAAAAATTAAACAATGGCCATTGACAGAAGAGAAAATAAAAGCATTAACAGCAATTTGTGAGAAAATGGAGAAGGAAGGAAAAATTACAAAAATTGGGCCTGAAAATCCATATAACACTCCAATCTTTGCCATAAAAAAGAAGGACAGTAGTAAGTAGAGAAAATTAGTAGATTTCAGGGAACTTAATAAAAGAACTCAAGACTTTTGGGAGGTTCAATTAGGAATACCGCACCCAGCAGGGTTAAAAAAGAAAAAATCAGTGACAGTACTGGATGTGGGGGATGCATATTTTTCAGTTCCTTTAGATAAAGGCTTCAGAAAATATACTGCATTCACCATACCTAGTGTGAACAATGAAACACCAGGGATTAGATATCAATATAATGTACTCCCACAAGGATGGAAAGGGTCGCCAGCAATATTCCAGAGTAGCATGACAAAAATCTTAGAGCCCTTTAGAGCAAAAAATCCAGAAATAGTCATCTATCAATATATGGACGACCTGTATGTAGGATCTGACCTAGAAATAGGGCAACATAGAGCAAAGATAGAGGAGTTAAGAGAACATCTATTAAAATGGGGATTTACCACACCAGATAAAAAACATCAAAAAGAACCCCCATTTCTTTGGATGGGGTATGAACTCCATCCTGACAAATGGACAGTACAGCCTATACAGCTGCCAGAAAAAGATAGCTGGACTGTCAATGATATACAGAAGTTAGTGGGAAAATTAAACTGGGCAAGTCAGATTTACCCAGGGATTAAAGTAAAGAAACTTTGTAAACTTCTTAGGGGAGCCAAAGCATTAACAGACATAGTACCACTAACTGAAGAAGCAGAATTAGAATTGGCAGAGAACAGGGAAATTCTAAAAGAACCAGTACATGGAGTATATTATGACCCATCAAAAGACTTGATAGCTGAAATACAGAAACAGGGGGATGACCAATGGACATATCAAATTTACCAAGAACCATTCAAAAATCTGAAAACAGGGAAGTATGCAAAAATGAGGACTGCACATACTAATGATGTAAAGCAGTTAACAGAGGCAGTGCAAAAAATAGCCTTGGAAAGCATAGTCATATGGGGAAAGACTCCTAAATTTAGACTACCCATCCAAAAAGACACATGGGAGATGTGGTGGACAGATTATTGGCAAGCCACCTGGATTCCTGAATGGGAGTTTGTGAATACCCCTCCCCTAGTAAAATTATGGTACCAGCTGGAGAAAGAACCCATAGCAGGAGTAGAAACTTTCTATGTAGATGGAGCAGCTAATAGGGAAACAAAAATGGGAAAAGCAGGGGATGTTACTGACAGAGGAAGGCAGAAAGTTGTTCCTTTAAGTGAAACAACAAATCAGAAGACTGAATTACAAGCAATTCAGCTAGCTTTGCAAGATTCAGGATCAAAAGTAAACATAGTAACAGATTCACAGTATGCATTAGGAATCATTCAAGCACAACCAGACAAGAGTGAATCAGAGTTAGTCAACCAAATAATAGAACAATTAATAAGAAGGGAAAGGGTCTACCTGTCATGGGTACCAGCACACAAAGGAATTGGAGGAAATGAACAAGTAGACAAATTAGTAAGTAATGGAATCAGGAAAGTGTTGTTCCTAGATGGAATAGATAAAGCTCAAGAAGAGCATGAAAAATATCACAATAATTGGAGAGCAATGGCTGCTGATTTTAATCTGCCACCTGTAGTAGCAAAAGAAATAGTAGCTAGCTGCGATAAGTGTCAGCTAAAAGGGGAAGCCATGCATGGACAAGTAGACTGTAGTCCAGGAATATGGCAATTAGATTGCACTCATCTAGAAGGGAAAGTTATCCTGGTAGCAGTCCATGTAGCCAGTGGCTATATAGAAGCGGAAGTTATCCCAGCGGAAACAGGACAGGAGACAGCATACTATATATTAAAGCTAGCAGGAAGGTGGCCAGTAAAAGTAATACATACAGACAATGGCCCCAATTTCACCAGTGCTGCAGTTAAGGCAGCCTGTTGGTGGGCAGGTATCCAACAGGAATTTGGGATTCCCTACAATCCCCAAAGTCAGGGAGTCGTAGAATCCATGAATAAAGAATTAAAGAAAATCATAGGGCAGGTAAGAGATCAAGCTGAGCACCTTAAGACAGCAGTACAAATGGCAGTATTCATTCACAATTTTAAAAGAAAAGGGGGGATTGGGGGGTACAGTGCAGGGGAAAGAATAATAGACATAATAGCAACAGACATACAAACTAAAGAATTACAAAAACAAATTTTAAACATTCAAAAATTTCGGGTTTATTACAGGGACAGCAGAGAACCAATTTGGAAAGGACCAGCAAAGCTACTCTGGAAAGGTGAAGGGGCAGTAGTAATACAAGATAACAGTGACATAAAGGTAGTACCAAGGAGGAAAGTAAAAATCATTAGGGACTATGGCAAACAGATGGCAGGTGCTGATTGTGTGGCAGGTAGACAGGATGAAGATTAGAACATGGAATAGTTTAGTAAAGCACCATATGTATGTTTCAAAGAGAGCTAGTAGATGGTTTTACAGACATCATTATGAAAGCAGACATCCAAAAGTAAGTTCAGAAGTACACATACCATTAGGGGAGGCTAGATTAGTAATAACAACATATTGGGGCTTGCAACCAGGAGAAAGAGATTGGCATATGGGTCATGGAGTCTCCATAGAATGGAGATTGAGAAGATATAGCACACAAGTAGACCCTGACCTGGCAGACCAGCTAATTCATATGCATTATTTTGATTGTTTTGCAGACTCTGCCATAAGGAATGCCATATTAGGACACGTAGTTAGTCCTAGGTGTGATTATCAAGCAGGACATAATAAGGTAGGATCTCTACAATACTTGGCACTGACAGCATTGATAAAGCCAAAAAAGAGAAAGCCACCTCTGCCTAGTATTAGAAAATTAGTAGAGGATCGATGGAACAACTCCCAGAAGATCAGGGGCCGCAGAGGGAACCATACAATGAATGGACATTAGAGGTCCTAGAGGAACTCAAGCAGGAAGCTGTCAGGCACTTTCCTAGACCATGGCTCCATAGCTTAGGACAGTATATCTATGAAACCTATGGGGATACCTGGGCAGGAGTTGAAGCTATAATCAGAGTACTACAACAACTACTGTTTATTCATTTCAGAATTGGGTGCCAGCATAGCAGAATAGGAATTATACGACAGAGAAGAGCAAGAAATGGAGCCAGTAGATCCTAACCTAGAGCCCTGGAACCATCCAGGAAGTCAGCCTAACACTCCTTGTAATAATTGCTATTGTAAACACTGTAGCTACCATTGTCTAGTTTGCTTTCAGAAAAAAGGCTTAGGCATTTCCTATGGCAGGAAGAAGCGGAGACAGCGACGAAGCACTCCTCCAAGCAGTAAAGATCATCAAAATCCTGTATCAAAGCAGTAAGTAGATGTAATGTTGAATTTACTAGCAAGAGTAGATTATAGATTAGGAGTAGGAGCTCTGATAATAGGTTTAATCATAGCAATAGTTGTGTGGATCATAGCATACTTAGAATATAGGAAATTGGTAAGACAAAGGAAAATAGACAGGTTAATTAAAAGAATTAGGGAAAGAGCAGAAGACAGTGGCAATGAGAGTGAGGGGGATACTGAGGAATTGGCCACAATGGTGGATGTGGAGCATCTTAGGCTTATGGATGATAATAATTTGTAGGGTAGTAGGGAACTTGTGGGTCACAGTCTATTATGGGGTACCTGTATGGACAGAAGCAAAAACTACTCTATTCTGTGCATCAGATGCTAAAGCATATGAGAAAGAAGTGCATAATGTATGGGCTACACATGCCTGTGTACCCACAGACCCCAACCCACAAGAAATAGTTTTGGAAAATGTAACAGAAAATTTTAACATGTGGAAAAATGACATGGTGGATCAGATGCATGAGGATATAATCAGTTTATGGGATCAAATGCTAAAACCATGTGTAAAGTTGACCCCACTCTGTGTCACTTTAAATTGTACAGATGCACAACTCAATGGTAACGAAACGAAAAAACTCAATGAGAGTATAAAGGGAGAAGTAAAAAATTGCTCTTTCAATGCAACCACAGAATTAAGAAATAAGAAACAGAATGTGTATGCACTTTTTTATAAATCTGATGTGGTACCACTTAATGATAAGAATAGCACTGGTAACTATAGTAATTATATATTAATAAATTGCAATACCTCAACCATAACACAGGCCTGTCCAAAGGTCTCTTTTGACCCAATTCCTATACATTATTGTGCTCCAGCTGGTTATGCGATTCTAAAGTGTAATAATAAGACATTCAATGGGACAGGACCATGTCATAATGTCAGCACAGTACAATGTACACACGGAATTAAACCAGTGGTATCAACTCAACTACTGTTAAATGGTAGCCTAGCAGAAGGGGAGATAATAATTAGATCTGAAAATATGACAAACAATATCAAAACAATAATAGTACACCTTAATAAAGCTATAAATATTACGTGTACAAGACCTGGCAATAATACAAGAAAAAGTATAAGGATAGGACCAGGACAAACATTCTATGCAAATAATGACATAATAGGAGACATAAGAAAAGCATATTGTAACATTAGTAGAGAAGCATGGAACAAAACTATAGGACAGATAAAGGAAAAATTAAAAGAATACTTCCCTAATAAAACAATAAAATTTGATTCACACTCAGGAGGGGATCTAGAAATTACAACACATAGTTTTAATTGTAGAGGAGAATTTTTCTATTGCAATACAACAAAACTGTTTAATGAAAAAGCATTTGCAAACAGCACAAATGAGTCAAACATCACGCTTCCATGCAGAATAAAACAAATTATAAACATGTGGCAGGAGGTAGGACGAGCAATGTATGCCCCTCCCATTGCAGGAAACATAACATGTATCTCAAATATCACAGGAATACTATTGACACGTGATGGAGGAAACATAACTAACAACACACAGACAGAGACATTCAGACCTGAAGGAGGAAATATGAAGGACAATTGAAGAAATGAATTATATAAATATAAAGTGGTAGAAATTAAACCATTGGGAGTAGCACCCACCGAGGCAAGAAGGAGAGTGGTGGAGAGAGAAAAAAGAGCAGTGGGAATAGGAGCTGTACTCCTTGGGTTCTTGGGAGCAGCAGGAAGCACTATGGGCGCGGCGTCAATAACGCTGACGGTACAGGCCAGACAACTGTTGTCTGGTATAGTGCAACAGCAAAGCAATTTGCTGAGAGCTATAGAGGCGCAACATCATATGTTGCAACTCACAGTCTGGGGCATTAAGCAGCTCCAGACAAGAGTCCTGGCTATAGAAAGATACCTAAAGGATCAACAGCTCCTAGGGCTTTGGGGCTGCTCTGGAAAACTCATCTGCACCACTAATGTGCCTTGGAACTCCAGTTGGAGTAATAAGAATCAAACAGAAATTTGGGATAACATGACCTGGATGCAGTGGGATAGAGAAATTAACAATTACACACAAACAATATACCAGTTGCTTAAAGAATCGCAAAGCCAACAGGAGAAAAATGAAAAGGATTTATTATCATTGGACAGTTGGAACAGTCTGTGGAATTGGTTTAGCATAACAAAGTGACTGTGGTATATAAAAATATTCATCATGATAGTAGGAGGCTTGATAGGTTTGAGAATAATTTTAGGTGTGCTTTCTATAGTAAAAAGAGTTAGGCAGGGATACTCACCTTTGTCGTTTCAGACCCTTATCCCAAACCCGAGGGGACCCGACAGGCTCGGAAGAATCGAAGAAGAAGGTGGAGAGCAAGACAGAGACAGATCCGTGCGATTAGTGAGCGGATTCTTATCACTTGCCTGGGACGATTTGAGGAGCCTGTGCCTTTTCTGCTACCACCAATTGAGAGACTTCATATTGCTGGCAGCGAGAACAGTGGAACTTCTGGGACGCAGCAGTCTCAAGGGACTACAGAGAGGGTGGGAAGCCCTTAAGTATCTGGGAAATCTTGTGCAGTGTTGGGGTCTGGAGCTAAAAAAGAGTGCTATTCGCCTGCTGGATATCATAGCAATAGCAGTAGCTGAAGGAACAGATAGGATTATAGAAGTAGTACAAAGATTTTGTAGAACTATCTGCAACATACCTAATAGAATAAGACAGGGCTTTGAAGCAGCTTTGCTATAAAATGGGGGGCAAGTGGTCAAAAAGCAGTATAGTTGGATGGCCTGCTGTAAGAGAAAGAATAAGACGAACTGAACCAGCAGCAGAGGGAGTAGGAGCAGCGTCTCAAGACTTAGATAAATGTGGAGCACTTACAACCAGCAACACAGCCCACAATAATGCTGATTGTGCCTGGCTGCAAGCACAAGAGGAAGA
>D.UG.92.92UG001_AJ320484_F1.FR.96.MP411_AJ249238
GGAAGGGCTAATTTGGTCCCAAAGAAGACAAGAAATCCTTGATCTTTGGGTCTACCACACACAAGGCTATTTCCCTGATTGGCAAAACTACACACCAGGGCCAGGGATTAGATACCCACTGACCTTTGGTTGGTGCTTCGAGCTAGTACCAGTAGATCCAGAGGAGGTAGAAGAGGCCAATAAAGGAGAGAACAACTGCTTGTTACACCCTATGAGCCAGCATGGAATGGAGGACCCGGAGAGAGAGGTGTTAGTGTGGAGATTTAACAGCAGACTAGCATTTGAACACAAGGCCCGAATACAGCATCCGGAGTTCTACAAAGACTGCTGACACCAGTACTACAAGGACTGCTGACACCGAGTTTGCTACAAGGGACTTTCCACTGGGGACTTTCCAGGGAGGCGTAACCGGGGCGGGACAGGGGAGTGGCTGACCCTCAGATGCTGCATATAAGCAGCTGCTTTTTGCCTGTACTGGGTCTCTCTGGTTAGACCAGATTTGAGCCTGAGAGCTCTCTGGCTAGCTAGGGAACCCACTGCTTAAGCCTCAATAAAGCTTGCCTTGAGTGCTTCAAGTAGTGTGTGCCCGTCTGTTGTGTGACTCTGGTAACTAGAGATCCCTCAGACCTCTTTAGTCAGTGTGGAAAATCTCTAGCAGTGGCGCCCGAACAGGGACCTGAAAAGCGAAAGTAAAACCAGAGAAGCTCTCTCGACGCAGGACTCGGCTTGCTGAGCGCGCACGGCAAGAGGCGAGGGGCAGCGACTGGTGAGTACGCTGAAATTTTTTGACTAGCGGAGGCTAGAAGGAGAGAGATGGGTGCGAGAGCGTCAGTATTAAGCGGGGGAAAATTAGATGCATGGGAAAAAATTCGGTTACGGCCAGGAGGAAAGAAAAAATATAGACTGAAACATATAGTATGGGCAAGCAGGGAGTTAGAACGATTCGCACTTAATCCTGGCCTTTTAGAGACATCAGAAGGCTGTAAACAAATAATAGGACAGCTACAACCAGCTGTTCAGACAGGATCAGAAGAACTTAAATCATTATTTAATACAGTAGCAACCCTCTATTGTGTACATGAGAGGATAGAGGTAAAGGACACCAAGGAAGCTTTAGAAAAAATAGAGGAAGAACAAGCCAAAAGTAAGAAAAAAGCACAGCAAGCAACAGCTGACACAAGAAACAGCAGCCAGGTCAGCCAAAATTATCCTATAGTGCAAAACCTACAGGGACAAATGATACACCAGGCCATATCACCTAGAACTTTGAATGCATGGGTAAAAGTAATAGAAGAGAAGGCTTTCAGCCCAGAAGTAATACCCATGTTTACAGCATTATCAGAAGGAGCCACCCCGCAAGACTTAAACACCATGCTGAACACAGTAGGGGGGCATCAAGCAGCCATGCAGATGTTAAAAGAGACCATCAATGAGGAAGCTGCAGAATGGGATAGGCTACATCCACCGCAGGCAGGGCCTGTTGCACCAGGCCAGATGAGGGAACCAAGGGGAAGTGATATAGCAGGAACTACTAGCACCCTTCAGGAACAAATAGGGTGGATGACAAGCAATCCGCCTGTCCCAGTAGGAGAGATCTATAAAAGATGGATAATCCTGGGGTTAAATAAAATAGTAAGAATGTATAGTCCTGTCAGCATTTTGGACATAAGACAAGGGCCAAAGGAACCTTTTAGAGACTATGTGGACAGGTTCTTTAAAACTCTAAGAGCTGAGCAAGCTTCACAGGAAGTAAAGAATTGGATGACCGAAACCTTGTTGGTCCAAAATGCAAACCCAGATTGTAAAACTATCTTAAAAGCACTGGGACCAGGGGCTACATTAGAAGAAATGATGACAGCATGTCAGGGAGTAGGGGGACCCAGTCATAAAGCAAGAGTTTTGGCTGAGGCAATGAGCCAAGCAACAAATTTGAATGGTGCCGCAATGATGCAGAGAAGCAATTTTAAGGGCCCAAGGAAAATTGTTAAGTGTTTCAACTGTGGCAAAGAAGGGCACATAGCAAGAAATTGCAAGGCTCCTAGGAAAAAGGGCTGTTGGAAATGTGGCAGTGAAGGACACCAAATGAAAGATTGCACTGAAAGACAGGCTAATTTTTTAGGGAAAATTTGGCCTTCCCACAAGGGGAGGCCAGGCAACTTCCTTCAAAACAGACCAGAGCCAACAGCCCCACCAGCAGAGAGCTTCGGGTTTGGGGAGGAGATAACCCCCTCTCAGAAACAAGAGCAGAAAAACCAGGAACCACAACCTTTAACTTCCCTCAGATCACTCTTTGGCAACGACCCCTTGTTACCATAAAGATAGGGGGACAGCTAAAGGAAGCTCTATTAGATACAGGAGCAGATGATACAGTGTTAGAAGACATAAATTTGCCAGGAAAATGGAAACCAAAAATGATAGGGGGAATTGGAGGTTTTATCAAAGTAAGACAGTATGATCAAATACCCATAGAAATCTGCGGATATAAAGCTATAGGTACAGTATTAATAGGACCTACACCTGTCAACATAATTGGAAGAAATTTGTTGACTCAGATTGGCTGCACTTTAAATTTTCCAATTAGTCCTATTGAAACTGTACCAGTAAAATTAAAGCCAGGGATGGATGGCCCAAAAGTTAAACAATGGCCATTGACAGAAGAAAAAATAAAAGCACTAACAGAAATTTGTGCAGACATGGAAAAAGAAGGAAAAATTTCAAGAATTGGGCCTGAAAATCCATACAATACTCCAGTATTTGCCATAAAGAAAAAAGACAGTACTAAGTGGAGAAAATTAGTAGATTTCAGAGAACTTAATAAGAGAACTCAAGATTTCTGGGAAGTTCAACTAGGAATACCACATCCTGCAGGGCTAAAGAAGAAAAAATCAGTAACAGTACTGGATGTGGGTGATGCATATTTTTCAGTTCCCTTAGATATAGACTTTAGAAAGTATACAGCATTCACCATACCTAGTACAAACAATGAGGCACCAGGAATTAGATATCAGTACAATGTGCTTCCACAGGGATGGAAAGGATCACCAGCAATATTCCAATGTAGCATGACAAAAATCTTAGAACCCTTTAGAAAACAAAATCCAGAAATAGTTATCTATCAATACATGGATGATTTGTATGTAGGATCTGACTTAGAAATAGGGCAGCATAGAACAAAAATAGATGAATTAAGGGAACATCTATTGAGGTGGGGACTTATCACACCAGACAAAAAACATCAGAAAGAACCTCCATTTCTTTGGATGGGTTATGAACTCCATCCTGATAAATGGACAGTGCAGCCTATAAAGCTGCCAGAAAAAGAAAGCTGGACTGTCAATGATATACAGAAGTTAGTGGGAAAATTAAATTGGGCAAGCCAGATTTATCCAGGAATTAGAGTAAAACACTTATGTAAACTCCTTAGGGGAGCCAAAGCACTGACAGAAGTAATACCACTGACAAAAGAAGCAGAATTAGAACTGGCAGAAAACAAGGAAATTCTAAAAGAACCAGTACATGGAGTGTATTATGACCCATCAAAAGACTTAATAGCAGAAGTACAGAAACAAGGGCAAGACCAATGGACATATCAAATTTATCAAGAGCCATTTAAAAATCTGAAAACAGGAAAGTATGCAAAAATGAGGAGTGCCCACACTAATGATGTAAAACAATTAACAGAGGCAGTGCAAAAAATAGCCCAAGAATGCATAGTAATATGGGGAAAGACTCCTAAATTTAGACTACCCATACAAAAGGAAACATGGGAAGCATGGTGGAAAGAATATTGGCAGGCCACCTGGATTCCTGAGTGGGAGTTTGTCAATACCCCCCCCTTAGTTAAATTATGGTACCAGTTAGAGAAGGAACCCATACTAGGAGCAGAAACTTTCTATGTAGATGGGGCAGCTAATAGAGAGACCAAATTAGGAAAAGCAGGATATGTTACTAACAAAGGAAGACAGAAAGTTGTCTCTCTAACTGACACAACAAATCAGAAGACTGAGTTACAAGCCATTAATCTAGCTTTGCAGGATTCGGGATTAGAAGTAAACATAGTAACAGATTCACAATATGCATTAGGAATCATTCAGGCACAACCAGATAAAAGTGAATCAGAGTTAGTCAGTCAAATAATAGAGCAGTTAATAAAAAAGGAAAAGGTCTACCTAGCATGGGTACCAGCACACAAGGGGATTGGAGGAAATGAGCAAGTAGATAAATTGGTCAGTAATGGAATCAGGAAAGTATTATTTTTGGATGGAATAGATAAGGCTCAAGAAGAACATGAGAAATACCACAACAATTGGAGAGCAATGGCTAGTGATTTTAACCTGCCACCTGTGGTAGCGAAAGAAATAGTAGCTAGCTGTGATAAATGTCAGCTAAAAGGAGAAGCCATGCATGGACAAGTAGACTGTAGTCCAGGAATATGGCAATTAGATTGTACACATCTAGAAGGAAAAGTTATCCTGGTAGCAGTTCATGTAGCCAGTGGCTATATAGAAGCAGAAGTGATCCCAGCAGAAACAGGGCAGGAAACAGCCTACTTTATCTTAAAATTAGCAGGAAGATGGCCAGTAAAAGTAGTACATACAGACAATGGCAGCAATTTCACCAGTTCTGCAGTTAAGGCTGCCTGTTGGTGGGCAGGCATTAAGCAGGAATTTGGAATTCCCCACAATCCCCAAAGTCAAGGAGTAGTGGAATCTATGAATAAAGAATTAAAGAAAATTATAGGACAGGTAAGAGATCAAGCTGAACATCTTAAGACAGCAGTACAAATGGCAGTATTCATTCACAATTTTAAAAGAAAAGGGGGGATTGGGGAGTACAGTGCAGGGGAAAGAATAATAGACATAATAGCAACAGACATACAAACTACAAAATTACAAAAACAAATCATAAAAATTCAAAATTTTCGGGTTTATTACAGGGACAGCAGAGATCCAATTTGGAAAGGACCAGCAAAGCTTCTCTGGAAAGGTGAAGGGGCAGTAGTACTACAAGATAATAGTGACATAAAGGTAGTACCAAGAAGAAAAGTAAAGATCATTAGGGATTATGGAAAACAGATGGCAGGTGATGATTGTGTGGCAAGTAGACAGGATGAGGATTAGCACTTGGAAAAGTTTAGTAAAACACCATATGTATGTTTCAAAGAAAGCTCAAGGATGGTTGTATAGACATCACTATGACAGCCCTCACCCAAAAATAAGTTCAGAAGTACACATCCCATTAGGAGACGCTAGACTGGTAGTAAAAACATATTGGGGCCTGCATACAGGAGAAAGAGAATGGCATCTGGGTCAAGGAGTCTCCATAGAATGGAGAAAAAGGAGATATAGCACACAAGTAGACCCTGGCCTAGCAGACCAACTAATTCATATGTATTATTTTGATTGTTTTGCAGAATCTGCTATAAGAAAAGCCATATTAGGACAATTAGTTAGTCCTAGGTGTGAATATCAAGCAGGACATAACAAGGTAGGATCCTTACAGTATTTGGCACTAACAGCATTAATAAAACCAGAAAAAACAAAGCCACCTTTGCCTAGTGTTAGGAAGCTAACAGAAGATAGATGGAACAAGCCCCAGAAGACCAAGGGCCACAGAGGGAGCCGAACAATGAGTGGACATTAGAGCTTTTAGAGGAACTTAAGAGTGAGGCTGTTAGACATTTTCCTAGGATATGGCTCCATGGATTAGGGCAATATATCTATGAAACTTATGGGGATACATGGGCAGGAGTTGAAGCTCTAATAAGAACCCTGCAACAACTACTGTTTATTCATTTCAGAATTGGGTGTCAACATAGCAGAATAGGCATTATTCAACAGAGAAGACCAAGAAATGGACCCCGTAGATCCTAACTTAGAGCCCTGGAACCATCCAGGATGTCAGCCTAGGACTTCTTGTAACAATTGCTATTGTAAAAAGTGTTGCTATCATTGCCAAAAATGCTTCTTAACGAAAGGCTTAGGCATCTCATATGGCAGGAAGAAGCGGAGACAGCGACGAAGAGCTACTCCGGACGATCAGGCTCATCAAGATCCTATACCAAAGCAGTGAGTAATCTATGTAATGCAACCTTTAGAGATATTAGCAATAGTAGCATTAGTAGTAGCGCTAATACTAGCAATAGTGGTGTGGACCATAGTATTTATAGAGTGGAAGAAAATAAAAAGGCAAAGAAAAGTAGACTGGTTAATTGATAGAATAAGAGAAAGAGCAGAAGATAGTGGCAATGAGAGTGAGGGAGATAGAGAGGAATTATCTATGCTTGTGGAGATGGGGCATCATGCTCCTTGGGATGTTGATGACATATAGTGTTGCAGAGAAGAAGTGGGTCACAGTGTATTATGGGGTACCTGTGTGGAAAGAAGCAACAACCACTCTATTTTGTGCATCAGATGCTAAATCATATAAAACAGAGGTACATAATATCTGGGCTACACATGCCTGTGTACCAACAGACCCCAACCCACGAGAAATAGAACTGGAAAATGTCACAGAAAACTTTAACATGTGGAAAAATAACATGGTGGAGCAGATGCATGAGGATATCATCAGTTTATGGGATCAAAGCCTAAAACCATGTGTAAAATTAACCCCACTCTGTGTCACTTTAAACTGCACTGATGCAAGGAGGAATGAGACTAGGAATAATATTACAGGAATGGAAAACAATGATCAAATAGAAATGAAAAACTGCTCTTTCAATATAACCACAAAATTAATAGATAAGAAGAAGCAAGTACATGCACTTTTTTATAGACTTGATGTGGTACAAATAGATAATGATACTAGTAATAGCAACTATAGCAACTATAGATTAATAAATTGCAATACCTCAGCCATTACACAGGCTTGTCCAAAGGTAACTTTTGAGCCAATTCCCATACATTATTGTGCCCCAGCTGGTTTTGCAATTCTAAAGTGTAGAGATAAGAAGTTCAATGGAACAGGACCATGCAAAAATGTCAGCACAGTACAATGCACACATGGAATTAGGCCAGTAGTGTCAACCCAACTGCTGTTGAATGGCAGTCTAGCAGAAGAAGAGATAATAATTAGATCTGAAAATCTCACAAACAATGCTAAAACCCTAATAGTACAGCTTAATGAGTCTGTAGAAATCAATTGTACAAGGCCCTACTACAACCAGATAAGACAAAGAACATCTATAGGACAAGGGCAAGCACTCTATACAACAAGAGTAACGGGAGATATAAGAAAAGCATATTGCAATATTAGTAAAGCAGGATGGAATAAAACTTTACAGCAGGTAGCAAAAAAATTAGGAGACCTCTTTAACCAGACAACAATAATTTTTAAACCATCCTCGGGAGGAGACCCAGAAATTACAACACACAGCTTTAATTGTGGAGGGGAATTTTTCTACTGCAATACATCAAAACTGTTTAACAGTGCATGGAATGACAGTACATGGAATATAGGGAATAATAATACAGGGTCAGATAATGAGACAATCATTATCCCATGCAGAATAAAACAAATTATAAACATGTGGCAGGGAGTAGGAAAAGCAATGTATGCCCCTCCCATCGAAGGATGGATCAATTGTGCATCAAATATTACAGGGCTCTTACTGGTAAGGGATGGTGGTGGTGCAAATGATAGTCAGAACGAGACCTTCAGACCTCAAGGAGGAGATATGAGAGACAATTGGAGAAGTGAATTATACAAGTATAAAGTAGTAAAAATTGAACCACTAGGAATAGCACCCACCAAGGCAAAGAGAAGAGTGGTGGAAAGAGAAAAAAGAGCAATAGGACTAGGAGCTATGTTCCTTGGGTTCTTGGGAGCAGCAGGAAGCACGATGGGCGCAGCGTCATTGACGCTGACGGTACAGGCCAGACAATTATTGTCTGGTATAGTGCAACATCAAAACAATTTGCTGATGGCTATAGAGGCGCAACAGCATCTGTTGCAACTCACAGTCTGGGGCATTAAACAGCTCCAGGCAAGAATCCTGGCTGTGGAAAGATACCTACAGGATCAACAGCTCCTAGGAAGTTGGGGGTGCTCTGGAAGACACATTTGCACCACTACTGTGCCCTGGAACTCTAGTTGGAGTAATAAATCTATAGATGACATTTGGAATAACATGACCTGGATGGAGTGGGAAAAAGAAATTGACAATTACACAGGTGTAATATACAGATTAATTGAGGAATCGCAAACCCAGCAAGAAAAGAATGAACAAGAACTATTGCAATTGGACAAATGGGCAAGTTTGTGGAATTGGTTTAGCATAACAAAATGGCTGTGGTATATAAAAATATTCATAATGATAGTAGGAGGCTTAATAGGGTTAAGAATAGTTTTTACTGTGCTTTCTTTAGTAAATAGAGTTAGGCAGGGATACTCACCTCTATCGTTTCAGACCCTCTTCCCAGCCCCGAGGGGACCCGACAGGCCCGAAGAAATAGAAGAAGGAGGTGGAGAGCAAGGCAGAGGCAGATCCACTCGATTGGTGAACGGATTCTCAACACTTATCTGGGACGATCTGAGGAACCTGTGCCTCTTCAGCTACCACCGCTTGAGAGACTTAATCTTAATTGCAACGAGGATTGTGGAACTTCTGGGACGCAGGGGGTGGGAAGCCATCAAATATTTGTGGAATCTCCTGCAGTATTGGAGTCAGGAACTGAAGACTAGTGCTATTAGCTTGTTTAACGCTACAGCAGTAGCAGTAGCTGAGGGGACAGATAGGGTTATAGAAGTAGTACAAAGATTTTTTAGAGGTATTCTTAACGTACCCACACGAATAAGACAGGGCTTGGAAAGGGCGTTACTATAAAATGGGTGGCAAATGGTCAAAAAGTAAAATTGGGTGGCCTGCTGTAAGGGACAGAATACAAAGAACTAGTCCAGCAGCAGAAGGGGTGGGAGCAGCATCTCGAGACCTGGAAAAACATGGGGCAATCACAAGTAGCAATACAGCAGAGACTAATCCTGACTGTGCCTGGCTAGAAGCACAAGAAGAGGAAGAGGAGGTGGGTTTTCCAGTTAGACCTCAGGTACCGTTAAGACCAATGGCTTACAAGGCAGCTTTTGATCTAAGCCACTTTTTAAAAGAAAAGGGGGGACTGGAAGGGTTAATTTACTCCAAGAAAAGACAAGAAATCCTTGATCTTTGGGTCTACCACACACAAGGCTATTTCCCTGATTGGCAAAACTACACACCAGGGCCAGGGATTAGATACCCACTGACCTTTGGTTGGTGCTTCGAGCTAGTACCAGTGGATCCAGAGGAGGTAGAAGAGGCCAATAAAGGAGAGAACAACTGCTTGTTACACCCTATGAGCCAGCATGGAATGGAGGACCCGGAGAGAGAGGTGTTAGTGTGGAGATTTAACAGCAGACTAGCATTTGAACACAAGGCCCGAATACAGCATCCGGAGTTCTACAAAGACTGCTGACACCAGTACTACAAGGACTGCTGACACCGAGTTTGCTACAAGGGACTTTCCGCTGGGGACTTTCCAGGGAGGCGTAACCGGGGCGGGACAGGGGAGTGGCTGACCCTCAGATGCTGCATATAAGCAGCTGCTTTTTGCCTGTACTGGGTCTCTCTGGTTAGACCAGATTTGGGCCTGAGAGCTCTCTGGCTAGCTAGGGAACCCACTGCTTAAGCCTCAATAAAGCTTGCCTTGAGTGCTTCAAGTAGTGTGTGCCCGTCTGTTGTGTGACTCTGGTAACTAGAGATCCCTCAGAC
>D.UG.99.99UGG35093_AF484495_F2.CM.97.CM53657_AF377956
GCGAGAGCGTCAGTATTAAGTGGGGGAAAATTAGATGAATGGGAGAAAATTCGGTTACGGCCAGGGGGAAACAAAAGATATAAACTAAAACATATAGTATGGGCAAGCAGGGAACTAGAACGATTTGCACTTAATCCTGGCCTTTTAGAAACATCAGAAGGCTGTAAACAAATAATGGGACAACTACAACCCGCCCTTAAGACAGGATCAGAGGAACTTAAATCATTATATAATACAGTAGCAACCCTCTATTGTGTACATGAAAGGATAAAGGTAACAGACACCAAGGAAGCTTTAGACAAGATAGAGGAAGAACAAACCAAAAGTAAGAAAAAAGCACAGCAAGCAAAAGCTGACACACAAAACAGCAGCCAGGTCAGCCAAAATTATCCTATAGTGCAAAACTTGCAGGGGCAAATGGTACATCAGGCCATATCACCTAGAACTTTGAACGCATGGGTAAAAGTAATAGAGGAGAAGGCTTTCAGCCCAGAAGTAATACCCATGTTTACAGCATTATCAGAAGGAGCCACCCCACAAGATTTAAACACCATGTTAAACACAGTGGGGGGACATCAAGCAGCCATGCAAATGTTAAAAGAAACCATCAATGAGGAAGCTGCAGAATGGGATAGGGCACATCCAATGCAGGCAGGGCCTCTTGCACCAGGCCAACTGAGAGATCCAAGGGGAAGTGATATAGCAGGAACTACTAGTAGCCTTCAGGAACAAATAGGATGGATGACAAGCAATCCACCTATCCCAGTAGGAGAAATCTATAAAAGATGGATAATCCTAGGATTAAATAAAATAGTAAGAATGTATAGCCCTGTCAGCATTTTGGACATAAGACAAGGACCAAAGGAACCCTTTAGAGACTATGTAGATCGGTTCTATAAAACTCTAAGAGCCGAGCAAGCTTCACAGGATGTAAAAAATTGGATGACAGAAACCTTGTTGGTCCAAAATGCGAACCCAGATTGCAAAACTATCTTAAAAGCATTGGGACCAGCGGCTACATTAGAAGAAATGATGACAGCATGTCAGGGAGTGGGGGGACCCAGTCATAAAGCAAGAGTTTTGGCTGAGGCAATGAGCCAAGCAACAAATGCAAATGCTGCTATAATGATGCAGAGAGGCAATTTTAAGGGCCCAAGGAAAACCCCTAAGTGTTTCAACTGTGGCAAAGAAGGGCACATAGCAAGAAATTGCAGGGCTCCTAGGAAAAGGGGCTGTTGGAAATGTGGAAAGGAAGGACATCAAATGAAAGATTGCACTGAAAGACAGGCTAATTTTTTAGGGAAAATTTGGCCTTCCCACAAGGGGAGGCCAGGAAATTTCCTTCAGAGCAGAACAGAGCCAACAGCCCCACCACTGGAGAGCTTCGGATTTGGGGAGGAGATAACACCCTCTCAGAAACAGGAGCAGAGAGGCAAGGAACAGTGTCCCTTAGTCTCCCTCAAATCACTCTTTGGCAACGACCCCTTGTCACAATAAAGATAGGGGGACAGCTAAAAGAAGCTCTATTAGACACAGGAGCAGATGATACAGTATTAGAAGAAATAAATTTACCAGGAAAATGGAAACCAAAAATGATAGGGGGAATTGGAGGCTTTATCAAAGTAAGACAGTATGAGCAAATACTTGTAGAAATCTGTGGACATAGAGCTATAGGTACAGTGTTAGTAGGACCTACACCTGTCAACATAATTGGAAGAAATTTGTTGACTCAGATTGGTTGCACTTTAAATTTTCCAATCAGTCCTATTGAAACTATACCAGTGAAATTAAAGCCAGGGATGGATGGCCCAAAAGTTAAACAATGGCCATTGACAGAAGAAAAAATAAAAGCACTGACAGAAATTTGTACAGATATGGAAAAGGAAGGGAAAATTTCAAGAATTGGGCCTGAAAATCCATACAATACTCCAATATTTGCTATAAAGAAAAAAGACAGTACTAAATGGAGAAAATTAGTAGATTTCAGAGAACTTAATAAAAGAACTCAAGACTTCTGGGAAGTTCAACTAGGAATACCACATCCTGCAGGGCTAAAAAAGAAAAAATCAGTAACAGTACTGGATGTGGGTGATGCATATTTTTCAGTTCCTTTAGATGAAGACTTTAGAAAATATACTGCATTCACCATACCTAGTATAAACAATGAGACACCAGGAATTAGATATCAGTACAATGTGCTTCCACAAGGATGGAAAGGATCACCGGCAATATTCCAAAGTAGCATGACAAAAATCTTAGAACCTTTTAGAAAACAAAATCCAGAAGTGGTTATCTATCAGTACATGGATGATTTGTATGTAGGATCTGACTTAGAAATAGGGCAGCATAGAATAAAAATAGAGGAATTAAGGGAACACCTATTGAAGTGGGGATTTACCACACCAGATAAAAAGCATCAGAAAGAACCTCCTTTTCTTTGGATGGGTTATGAACTCCATCCTGATAAATGGACAGTACAGCCTATAATGCTGCCAGAAAAGGAAAGCTGGACTGTCAATGATATACAGAAGTTAGTGGGAAAATTAAACTGGGCAAGCCAGATTTATCCAGGAATTAGAGTAAAAAACTTATGCAAATGTATTAGGGGAGCCAAAGCACTGACAGAAGTAGTACCACTGACAGCAGAAGCAGAATTAGAACTGGAAGAAAACAGGGAAATTCTAAAAGAACCAGTACATGGAGTGTATTATGACCCATCAAAAGACTTAATAGCAGAAATACAGAAACAAGGGCAAGACCAATGGACATATCAAATTTATCAAGAACAATATAAAAATCTGAAAACAGGAAAGTATGCAAAAACGAGGGGTACCCACACTAATGATGTAAAACAATTAACAGAGGCAGTGCAAAAAATAGCCCAAGAATGTATAGTAATATGGGGAAAGACTCCTAAATTTAGGCTACCTATACAAAAGGAAACATGGGAAACATGGTGGACAGAGTATTGGCAGGCCACCTGGATTCCTGAGTGGGAGTTTGTCAATACCCCTCCTTTAGTTAAATTATGGTACCAGTTAGAGAAAGAGCCCATAGTAGGAGCAGAAACTTTTTATGTAGATGGGGCAGCTAGTAGAGAGACTAAAATAGGAAAAGCAGGATATGTTACTGACAGAGGAAGACAGAAAGTTGTCTCTCTAACTGACACAACAAATCAGAAAACTGAATTACAAGCCATTAATCTAGCTTTGCAGGATTCGGGATCAGAAGTAAACATAGTAACAGACTCACAATATGCATTAGGAATCATTCAAGCACAACCAGATAAGAGTGAATCAGGGTTAGTTAGTCAAATAATAGAGCAGTTAATAAAAAAGGAAAAAGTCTACCTGTCATGGGTACCAGCACACAAGGGGATCGGAGGAAATGAACAAGTAGATAAATTAGTCAGTAATGGAATCAGGAAAGTACTATTCTTGGATGGAATAGATAAGGCTCAAGAAGAACATGAGAAATACCACAACAATTGGAGAGCAATGGCTAGTGATTTTAATCTGCCACCTGTGGTAGCAAAAGAAATAGTAGCTAGCTGTGATAAATGTCAGATAAAAGGAGAAGCCTTGCATGGACAAGTAGACTGCAGTCCAGGAATATGGCAATTGGATTGTACACATTTAGAAGGAAAAGTTATCCTGGTAGCAGTCCATGTAGCCAGTGGCTATATAGAAGCAGAAGTTATTTCAGCAGAAACAGGGCAGGAAACAGCATACTTCCTCTTAAAACTAGCAGGAAGATGGCCAGTAAAAGTAGTACATACAGACAATGGCAGTAATTTCACCAGCGCTGCAGTTAAGGCCGCCTGTTGGTGGGCAGGCATCAAGCAGGAATTTGGAATTCCCTACAATCCCCAAAGTCAAGGAGTAGTAGAATCTATGAATAAAGAATTAAAGAAAATTATAGGACAGGTAAGAGAGCAAGCTGAACATCTTAAAACAGCAGTACAAATGGCAGTATTCATTCACAATTTTAAAAGAAAAGGGGGGATTGGGGGGTACAGTGCAGGGGAAAGAATAATAGACATAATAGCTACAGACATACAAACTAAAGAATTACAAAAACAAATCACAAAAATTCAAAATTTTCGGGTTTATTACAGGGACAGCAGAGATCCAATTTGGAAAGGACCAGCAAAGCTTCTCTGGAAAGGTGAAGGGGCAGTAGTAATACAAGACAATAGTGACATAAAGGTAGTACCAAGAAGAAAGGTAAAAATCATTAGGGATTATGGAAAACAGATGGCAGGTGATGATTGTGTGGCAAGTAGACAGGATGAGGATTAACACATGGAAGAGCTTAGTAAAATATCATATATACGTTTCAAAGAAAGCTCAAGGATGGTTGTTTAGACATCACTATAACTGCCCACATCCAAAGATAAGTTCAGAAGTACACATTCCAATAGGAGAAGCTAGACTGGTAGTAAGAACATATTGGGGTCTGCACACAGGAGAAAGAGACTGGCATCTGGGTCAGGGAGCCTCCATAGAATGGAGGAAAAGGAGATATAGCACACAAGTAGACCCTGGCCTGGCAGACCAACTAATTCACCTATATTATTTTGATTGTTTTGCAGAATCTGCTATAAGAAAAGCCATATTAGGACATATAGTTACTCCTAGGTGTAATTATCAAGCAGGACATAACAAGGTAGGATCTTTACAATATTTGGCACTAACAGCATTAATAACACCAACAAAGATAAAACCACCTTTGCCTAGTGTTAGGAAGCTGACAGAAGACAGATGGAACAAGCCCCAGAGGACCAAGGGACACAGAGAGAGCCATATGAGACATGGGCATTAGAGCTTTTAGAAGAGCTTAAGAATGAAGCTGTTAGACACTTTCCTAGGGTGTGGCTTCAGGGTCTAGGACAATATATCTATGGAACTTATGGGGATACCTGGACAGGAGTTGAAGCCATAATAAGAATCCTTCAACACCTACTGTTTACCCATTTCAGAATTGGGTGTCAACATAGCAGAATAGGCATTACTCGACAGAGAAGAGCAAGAAATGGATCCAGTAGACCCTAACCTAGAGCCCTGGAACCATCCAGGAAGTCAGCCCAGTACTCCTTGTAACAAGTGCTATTGTAAAAAATGCTGCTATCATTGCCAACTTTGCTTCATAACGAAAGGCTTAGGCATCTCCTATGGCAGGAAGAAGCGGAGACAGCGACGAGGAACTCCTCAAGGCGATCAGGCTTATCAAGATCCTGTACCAAAGCAGTAAGTAGTACATGTAATGAAATCCTTGCTAACAATAGCAATAGTAGCATATATAGTAGCAATACTAATAGCAATAATTGTGTGGACTATAGTGTATATAGAATATAAGAAACTGTTAAGGCAAAAGAAAATAGACAGGTTAATTGATAGAATAAGAGAAAGAGCAGAAGATAGTGTCAATGAGAGTGAGGGAGACACAGAAGAGTTATCCAAGCTTGTGGATATGGGGCATCACGCTCCTTGGGATATTGATGACCTGTAGTATTGCAGAAAAGATGTGGGTCACAGTTTATTATGGGGTACCTGTGTGGAAAGAAGCAACCACTACTCTATTTTGTGCATCAGATGCTAAATCATATAAAACAGAGGCACATAATATCTGGGCTACACATGCCTGTGTACCAACAGACCCCAACCCACAAGAAATACAACTAGGAAATGTCACAGAAAACTTTAACATGTGGAAAAATAAGATGGTGGAGCAAATGCAGGAGGATATAATCAGTTTATGGGATCAAAGCTTAAAACCATGTGTAAAACTAACCCCACTCTGTGTTACTTTAAACTGCACAAATGCCACATCCCCTAATACCACATCCTCTAATATCACAACATCCACTAATGCCACTGCTGAGGGAGAATCAAGAATGAACAACTGCTCTTTCAATATAACCACAGAAGTAAAAGATAAGAAAAAGAAAGTATATGCACTTTTTTATAAACTTGATGTAGTACCAGTAGGTGGTAATGATAATACTAGCTATAGATTAATAAATTGTAATACCTCAGCTGTTACACAGGCTTGTCCAAAGATAACCTTTGAGCCAATTCCCATACATTATTGTGCTCCAGCTGGATTTGCGATTCTAAAATGTAATGATAACAATTTCAATGGGACAGGTCCATGCATCAATGTCAGCTCAGTACAATGTACACATGGGATTAAGCCAGTAGTGTCAACTCAACTGTTGTTGAATGGCAGTCTAGCAGAGGAAGACATAATGATTAGATCTGAGAACCTCACAAATAATGCTAAAATCATAATAGTACAGCTTAATGAGTCTGTAACAATTAATTGCACAAGGCCCGGCAATAATACAAGACAAAGTACGCGTATAGGACCAGGGCAAGCATTCTTTACAACAAAGGTAATAGGAGATATAAGACAAGCATATTGTAACATTAGTGAAGCAAAATGGAACAAAATTTTACAACAGGTAGCTAGCAAATTAAGGGACCTTCTTAACACAACAACAATAATTTTTGAACCATCCTCGGGAGGAGACGTAGAAATTGAAACGCACAGCTTTAATTGTGGAGGGGAATTTTTCTACTGCAACACAACAGGATTGTTTAATCATAGTAAATGGAATAATAATAATACATCAGAATGGAATAATACAGATAAGATAATCACACTCCCATGCAGACTAAAACAAATTATAAACATGTGGCAGGGAGTAGGAAGAGCTATGTATGCCCCTCCCATTGAAGGAGAAATTAAATGTTCATCAAATATTACAGGACTATTGTTAACAAGAGATGGAGGTACAAATAGTACTCAGAATGAGACCTTCAGACCTGGAGGGGGAGATATGAGAGACAATTGGAGAAGTGAATTATACAAATATAAAGTAGTAAGAATTGAACCACTAGGTCTAGCACCCACCAGAGCAAAGAGAAGAGTGGTGCAAAGAGAAAAAAGAGCAATAGGACTGGGAGCTATGTTCCTTGGGTTCTTGGGAGCAGCAGGAAGCACGATGGGCGCAACGTCGATGGCGTTGACGGTACAGGCCAGACAATTGTTGTCTGGTATAGTGCAACAGCAAAACAATTTGCTGAGGGCTATAGAGGCGCAACAGCATCTGTTGCAACTCACAGTCTGGGGCATTAAACAGCTCCAGGCAAGAATCCTGGCTGTGGAAAGATACCTAAAGGATCAACAGCTCCTAGGAATTTGGGGTTGCTCTGGAAAACACATTTGCACCACTACTGTGCCCTGGAACTCTAGCTGGAGTAATAAATCTTATGATCAGATTTGGAGGAGTAACATAACCTGGATGGAGTGGGAAAGAGAAATTGACAATTACACAGGTTTAATATTCAGCTTAATTGAAGAATCGCAAGTTCAGCAGGAAAGGAATGAAAAGGAACTATTGGAATTGGATACATGGGCAAGCTTATGGAATTGGTTTGACATATCAAACTGGCTGTGGTATATAAGAATATTCATAATGATAGTAGGAGGCTTGATAGGTTTAAGAATAGTTTTTGCTGTTTTTTCTTTAGTAAATAGAGTTAGGCAGGGATATTCACCTCTGTCGTTTCAGACCCTCCTCCCAGCTCCGAGGGGACCCGACAGGCCCGAAGGAATAGAAGAAGAAGGTGGAGAGCAAGGCAGAGACAGATCCATTCGATTGGTGAACGGATTATCAGCACTTATCTGGGACGATCTGAGGAACCTGTGCCTATTCTGCTACCACCGCTTGAGAGACTTAGTCTTGATTGCAACGAGGACTGTGGAACTTCTGGGGCGCAGGGGGTGGGAAGCCCTCAAGTATCTGTGGAATCTCCTACAGTATTGGATTCAGGAACTAAAGAATAGTGCTATTAGCTTGCTTAATACCACTGCAGTAGTAGTAGCTGAGGGGACAGATAGGGTTATAGAAGTAGTACAAAGAGCTGTTAGAGCTGTTCTTCACATACCTAGAAGAATAAGACAGGGCGCGGAAAGGCTTTTACTATAAAATGGGCGGCAAATGGTCAAAAAGTAGTATAGTTGGCTGGCCTGCTATAAGGGAAAGAATGAGAAGAACTGAGCCAGCAGCAGAAGGGGTGGGAGCAGTATCTCGGGACCTGGAAAGACATGGGGCAGTCACAAGTAGCAATACAGCACAGACTAATTCTGCCTGTGCCTGGCTAGAAGCACAAGAAGAGGATGGGGAAGTGGGTTTTCCAGTCAGACCTCAGGTACCATTAAGACCAATGACTTACAAAGGAGCTGTAGATCTGAGCCACTTTTTAAAAGAAAAGGGGGGACTGGAAGGGTTAATTTGGTCCCAGAAAAGACAAGAGATCCTTGATCTTTGGGTCTATCACACACAAGGCTACTTCCCTGATTGGCAAAACTACACACCAGGGCCAGGGATTAGATATCCATTGACCTTTGGATGGTGCTTCGAGCTAGTACCAGTTGATCCAAGGGAAGTAGAAGAGAACACTGAAGGAGAGAACAACTGCTTGTTACATCCTATAAACCAGCATGGAATGGAGGATACGGAGAGAGAAGTGTTAAAGTGGAGATTTAACAGTAGACTGGCATTTGAACACAAGGCCCGAAGCCTGCATCCGGAGTTCTACAAAGACTGCTGACACCGAGCTTTCTACAAGGGACTTTCCGCTGGGGACTTTCCAGAGTGGGAGGAACAGGGGCGGGACTGGGAGTGGCTAACCCTCAGATGCTGCATATAAGCAGCTGCTCTTTGCCTGTACTGGGTCTCTCTTGTTAGACCAGATTTGAGCCCGGGAGCTCTCTGGCTAGCTAGGGAACCCACTGCT
>D.ZA.84.R2_AY773338_G.ES.00.X558_AF423760
GACTGGTGAGTACGCTAAAAATTTTGACTAGCGGAGGCTAGAAGGAGAGAGATGGGTGCGAGAGCGTCAGTATTAAGCGGGGGAAAATTAGATGCATGGGAAAGAATTCGGTTAAGGCCAGGAGGGAAGAAAAAATATAAACTAAAACATATAGTATGGGCAAGCAGGGAGCTAGAACGATTTGCACTTAATCCTAGCCTTTTAGAAACAGCAGAAGGATGTAAACAAATAATAGGACAGCTACAACCAGCTGTTCAGACAGGATCAGAAGAACTTAAATCATTATATAATACAGTAATAACCCTCTATTGTGTACATGAAAGGATAGATGTAAAAGACACCAAGGAAGCTTTAGAAAAGATAGAGGAAGAACAAAACAAAAGTAAGAAAAAGAAGGCACAGCAAGCAGCAGCTGACACAGGAAACAGCAGCCAGGTCAGCCAAAATTATCCTATAGTGCAGAACCTACAGGGGCAAATGGTACATCAGGCCATATCACCTAGAACTTTGAATGCATGGGTAAAAGTAATAGAAGAAAAGGCCTTCAGCCCAGAAGTAATACCCATGTTTTCAGCATTATCAGAAGGAGCCACCCCACAAGATTTAAACACCATGCTAAACACAGTGGGGGGACATCAAGCAGCCATGCAAATGCTAAAAGAGACCATCAATGAAGAAGCTGCAGAATGGGATAGGCTACATCCAGTGCATGCAGGGCCTATTGCACCAGGCCAGATGAGAGAACCAAGGGGAAGTGATATAGCAGGAACTACTAGTACCCTTCAGGAACAAATAGCATGGATGACAAGCAACCCACCTATCCCAGTAGGAGAAATCTATAAAAGATGGATAATCCTGGGATTAAATAAAATAGTAAGAATGTATAGCCCTGTCAGCATTTTGGACATAAGACAGGGACCAAAGGAACCTTTTAGAGATTATGTAGACCGGTTCTATAAAACTCTAAGAGCCGAGCAAGCTTCACAGGATGTAAAAAACTGGATGACAGAAACCTTGTTGGTCCAAAATGCAAACCCAGATTGTAAAACCATCTTAAAAGCATTAGGACCACAGGCTACACTAGAAGAAATGATGACAGCGTGTCAGGGAGTGGGGGGGCCCAGCCATAAAGCAAGAGTTTTGGCTGAGGCAATGAGCCAAGCAACAAATTCAGCTACTGCAGTAATGATGCAGAGAGGCAATTTTAAGGGCCAAAGAAAAATTATTAAGTGTTTCAACTGTGGCAAAGAAGGGCACATAGCAAAAAATTGCAGGGCCCCTAGGAAAAAGGGCTGTTGGAAATGTGGAAGGGAAGGACACCAAATGAAAGAGTGCACTGAAAGACAGGCTAATTTTTTAGGGAAAATTTGGCCTTCCCACAAGGGAAGGCCGGGGAACTTTCTTCAGAGCAGACCAGAGCCAACAGCCCCACCATCAGAGAGCTTCGGGTTTGGGGAGGAGATAACCCCCTCTCAGAAACAGGAACAGAAAGACAAGGAACTGTATCCTTTAACCTCCCTCAAATCACTCTTTGGGAGCGACCCCTTGTCACAATAAAAATAGGGGGACAGCTAAAGGAAGCTCTATTAGATACAGGAGCAGATGATACAGTATTAGAAGAAATGAATTTGCCAGGAAAATGGAAACCAAAAATGATAGGGGGAATTGGAGGTTTTATCAAAGTAAGACAGTATGATCAAATACCCCTAGAAATCTGTGGGCATAAAGCTATAGGTACAGTATTGATAGGACCTACACCTGTCAACATAATTGGAAGAAATTTGTTGACTCAGCTTGGCTGCACTTTAAATTTTCCAATTAGTCCTATTGAAACTGTACCAGTAAAATTAAAGCCAGGAATGGATGGCCCAAAAGTTAAACAATGGCCATTGACAGAAGAAAAAATAAAAGCATTAACAGAAATTTGTACAGATATGGAAAAGGAAGGAAAAATTTCAAGAATTGGGCCTGAAAATCCATACAATACTCCAATATTTGCCATAAAGAAAAAAGACAGTACTAAATGGAGAAAATTAGTAGATTTCAGAGAACTTAATAAGAGAACTCAAGATTTCTGGGAAGTACAATTAGGAATACCACATCCTGCAGGGTTAAAAAAGAAAAAATCAGTAACAGTGCTAGATGTGGGGGATGCATACTTTTCAGTGCCCTTAGATGAAAGCTTTAGAAAGTATACTGCATTCACTATACCTAGTATAAACAATGAGACACCAGGGATTAGATATCAGTACAATGTGCTTCCACAGGGATGGAAAGGATCACCGGCAATATTCCAAAGTAGCATGACAAAAATCTTAGAGCCCTTTAGAAAACAAAATCCAGAGATGGTTATCTATCAATACATGGATGATTTGTATGTAGGATCTGACTTAGAAATAGGGCAACATAGAACAAAAATAGAGGAATTAAGAGAACATCTATTGAGGTGGGGATTTACCACACCAGATAAAAAACATCAGAAGGAACCTCCATTTCTTTGGATGGGTTATGAACTCCATCCTGATAAATGGACAGTACAGCCTATAATACTGCCAGACAAAAGAAAGGTTGGGACTGTCAATGATATACAGAAGTTAGTAGGGAAATTAAACTGGGCAAGCCAGATTTATCCAGGAATTAAAGTAAAGCAATTATGTAAACTCCTTAGGGGAACCAAAGCACTAACAGAAGTAATATCACTAACAGCAGAAGCAGAATTAGAACTGGCAGAAAACAGGGAAATTCTAAAAGAACCAGTACATGGAGTGTATTATGACCCATCAAAAGACTTAATAGCAGAAATACAGAAACAAGGGAATGGCCAATGGACATACCAAATTTATCAAGAACCATTTAAAAATCTGAAAACAGGAAAGTATGCAAGAACGAGGGGTGCCCACACTAATGATGTAAAACAATTAGCAGAGGCAGTGCAAAAAATAGCCACAGAAGGCATAGTAATATGGGGAAAGACTCCTAAATTTAGACTGCCCATACAAAAGGAAACATGGAAAACATGGTGGATAGAGTATTGGCAAGCCACCTGGATTCCTGAGTGGGAATTTGTCAATACCCCTCCTTTAGTAAAATTATGGTACCAATTAGAGAAGGAACCCATAATGGGAGCAGAAACTTTCTATGTAGATGGGGCAGCTAATAGAGAGACTAAAGTAGGAAAAGCAGGATATGTTACTGACAGAGGAAGACAGAAAGTTGTCCCTTTAACTGACACAACAAATCAGAAGACTGAGTTACAAGCAGTTAATCTAGCTTTGCAGGATTCGGGATTAGAAGTAAACATAGTAACAGATTCACAATATGTATTAGGAATCATTCAAGCACAACCAGATAAAAGTGAATCAGAGTTAGTCAGTCAAATAATAGAGCAGCTAATAAAAAAGGAAAAGGTTTACCTGGCATGGGTACCAGCACACAAAGGAATTGGAGGAAATGAACAAGTAGATAAATTAGTCAGTCAGGGAATCAGGAAAGTACTATTTTTGGATGGAATAGATAAGGCTCAAGAAGAACATGAGAAATATCACAACAATTGGAGAGCAATGGCTAGTGATTTTAACCTACCACCTGTGGTAGCAAAAGAAATAGTAGCTAGCTGTGATAAATGTCAGCTAAAAGGAGAAGCCATGCATGGACAAGTAGACTGTAGTCCAGGAATATGGCAATTAGATTGTACACATTTAGAAGGAAAAGTTATCATAGTAGCAGTTCATGTAGCCAGTGGCTATATAGAAGCAGAAGTTATTCCAGCAGAAACAGGGCAGGAAACAGCATACTTTCTCTTAAAATTAGCAGGAAGATGGCCAGTAAAAGTAGTACATACAGACAATGGCAGCAATTTCACCAGTGCTGCAGTTAAGGCCGCCTGCTGGTGGGCAGGTATCAAACAGGAATTTGGAATTCCCTACAATCCCCAAAGTCAAGGAGTAGTAGAATCTATGAATAAAGAATTAAAGAAAATACAAGGACAGGTTAGAGATCAAGCTGAACATCTTAAGACAGCAGTACAAATGGCAGTATTCATCCACAATTTTAAAAGAAAAGGGGGGATTGGGGGATACAGTGCAGGGGAAAGAATAGTAGACATTAGAGCAACAGACATACAAACTAAAGAATTACAAAAGCAAATCACAAAAATTCAAAATTTTCGGGTTTATTACAGGGACAGCAGAGATCCAATTTGGAAAGGACCAGCAAAACTTCTCTGGAAAGGTGAAGGGGCAGGAGAAATACAAGACAATAGTGACATTAAGGTACTACCAAGAAGAAAAGTGCAAATCATTAGGGATTATGGAAAACAGATGGCAGGTGATGATTGTGTGGCAAGTAGACAGGATGAGGATTAGCACATGGAAAAGTTTAGTAAAACACCATATGTATGTTTCAAAAAAGGCTAAAGGATGGTTTTATAGACATCACTATGACAGCCCCCACCCAAAAATAAGCTCAGAAGTACACATTCCACTAGGAGAAGAAAGACTGATAGTAAAAACATATTGGGGTCTGCATACAGGAGAAAGAGAATGGCATCTGGGTCAGGGAGTCTCCATAGAATGGAGGAAAAAGGAATATAGCACACAAGTTGACCCTGGCCTGGCAGACCAACTCATTCATATATATTATTTTGATTGTTTTTCAGACTCTGCTATCAGAAAAGCCTTATTAGGACATATGGTTAGACCTAGGTGTGAATACCAAGCAGGACATAACAAGGTTGGATCCTTACAGTATTTGGCACGAACAGCATTATTACCACCAAAAAAGACAAAGCCACCTTTGCCTAGTGTTAGGAAGCTATCAGAAGATAGATGGAACAAGCCCCAGAAGACCAAGGGCCACAGAGGGAGCCATACAACGAATGGACATTAGAACTTTTGGAGGAGCTTAAGAGTGAAGCTGTTAGACACTTTCCTAGATTATGGCTCCATAGCTTAGGACAACATATCTATGAAACTTATGGGGATTCCTGGGCAGGAGTTGAAGCTATAATAAGAATTCTGCAACAATTACTGTTTATTCATTTCAGAATTGGGTGTCAACATACCAGAAGAGGTATTACTCGGCAGAGAAGAGCAAGAAATGGATCCAGTAGATCCTAGCCTAGAGCCCTGGAACCATCCAGGAAGTCAGCCTAAGACTGCTTATAACAAGTGTCATTGTAAAAAGTGTTGCTTTCATTGTCAAGTTTGCTTCATAACGAAAGGCTTAGGCATCTCCTATGGCAGGAAGAAGCGGAGACAGCGACGAAAACCTCCTCACGGCGGTCAGGCTCATCAAGTTCCTATACCAGGGCAGTAAGTAGTTCATGTAATGCAACCTTTAGTGATAATAGCAATAGCAGCATTAGTAGTAGCACTAATAATAGCAATAGTTGTGTGGACCATAGTATTCATAGAATATAGGAGAATAAAAAAGCAAGGAAAAATAGACTGTTTAATTGATAGAATAATAGAAAGAGCAGAAGACAGTGGCAATGAGAGCGAGGGGGATAGAGAGGAATCGACAAAACTTGTGGACATGGGGCATCATGCTCCTTGGGATGTTGATGATCTGTAATGCTGCAGAAAATTTGTGGGTCACAGTTTATTATGGGGTGCCTGTATGGAAGGAAGCAACCACTACTCTATTTTGTGCATCAGATGCTAAATCCTATGAAACAGAGGCACATAATATCTGGGCTACACATGCCTGTGTACCCACGGACCCCAGCCCACAAGAAATAGAACTGGAAAATGTGACCGAAAACTTTAATATGTGGAAAAATAACATGGTAGACCAGATGCATGAGGATATAATCAGTTTATGGGATCAAAGCCTAAAACCATGTGTAAAATTAACCCCACTCTGTGTCACTTTAAACTGCAATAATAATGTTACCTTAAACAGCACTGGGGCCATCTGCAACAAGACTACGGGCAAAGCCACTGTGGAGTCAGAACTGGAGGTAAAAAACTGCTCTTTCAATATAACTACAGTAGTAAGAGATAAGAGAATGCAAGTACGTGCGCTTTTTTATAGACCTGATATAGTATCAATAGACAATGATAATACCAGTTATAGGTTAATAAATTGTAATACCTCAGCCATTACACAGGCTTGTCCAAAGGTATCCTTTCAACCAATTCCAATACATTATTGTGCCCCAGCTGGTTTTGCAATTCTTAAGTGTAGAGATAAGAAGTTCAATGGAACAGGCCCATGCACAAATGTCAGCACAGTACAATGTACACATGGAATTAAGCCAGTGGTGTCAACTCAACTGCTGTTGAATGGCAGTCTAGCAGAAGAAGAGATCATAATTAGATCTGAAAATCTCACAAACAATGCTAAAAACATAATAGTACAGTTTAATGCATCTGTAGAAATTAATTGTACAAGGCCCTACAAATATACAATACAAAAAACATCAATAGGACAAGGGCAAGCATTACATACAAGCAAGAGGATAATAGGAGACATAAGACAAGCACATTGTAACATTAGTGGAGAAAAATGGTATGAAACTCTACAACAGGTAGCTATAAAATTAGGAGACCTTCTTAACAAAACAACAATAACTTTTCGACCACCCTCAGGAGGGGACCCAGAAATTACAACACACAGTTTTAATTGTGGAGGGGAATTTTTCTACTGTAATACATCAAGGCTGTTTAATAATACATGGAATGGTACAACATGGTCAAATAAGACAGACACCAATGGGACAGTCACACTCCCATGCAGAATAAAACAAATTATAAACATGTGGCAGGAAGTAGGAAAAGCAATGTATGCCCCCCCCATAGAAGGACTACTTAGATGTTCATCAAATATTACAGGGTATATATTGACAAGAGATGGTGGTTATACCAGTTCTGGCAATGCGACCTTCAGACCTGGCGGAGGAGATATGAGGGACAATTGGAGAAGAGAATTATATACATACAAAGTAGTACAAATTGGACCAATAGGAGTAGTGCCCACCAGGGCAAAGAGAAGAGTGGTGGAAAGGGAAAAAAGAGGGGTTTTCTTGGGAGCAGCAGGAAGCACGATGGGCGCAGCGTCATTGTCGCTGCCGGTACAGGCCAGACAGGTATTGTCTGGTACAGTGCAACAGCAAAGCAATTTGCTCAGGGCTATATCGGCGCAACAGCATCTGTTGCAACTCACGGTCTGGGGCATTAAACAGCTCCAGGCAAGAGTCCTGGCTGTGGAAAGATACCTTAAGGATCAACGGCTCCTGGGACTTTGGGGTTGCTCTGGAAAACACATTTGCACCACTACTGTGCCCTGGAACTCTAGTTGGAGTAATAGAACTCAAGATGAGATTTGGCATAACATGTCCTGGATGCAGTGGGAAAGAGAAATTGACAATTACACAGGACTATTATACACCTCAATTGAAAGTTCGCAGGTTCAGCAAGAAAAGAATGAACAAGAATTATTGGAATTGGACAAGTGGGCAAGTCTGTGGAATTGGTTTAACATCACAAACTGGCTGTGGTATACAAAAATATTCAGAATCATATGGGGAGGCTTACCAGGTTTTAGAATGGTTTTTGCTGTGCTTTCTGTGGTACATAGAGTTAGGCAGGGATACTCACCTCTGTCATTTCAGACCCTCCTCCCAGCCCCGAGGGGACCCGACAGGCCCGAAGGAACAGAAGAAGAAGGTGGAGAGCGAGGCAGAGACAAATCAATTCGATTGGTGAACGGATTCTCCGCACTTATCTGGGACGATCTGCGGAACCTGTGCCTCTTCAGCTACCACCGCTTCAGAGACTTACTCTTGTTTGCAGCGAGGATTGTGGAACTTCTGGGACGCAGGGGGTGGGAAGCCCTCAAGTATCTGTGGAATCTCCTGCAGTATTGGAGTCAGGAACTCAAGAATAGTGCTATTTACTTGCTTGCTACCATCGCAATCGTACCAGCAGAGGGGACAGACAGGGTTATACAAGTTGTACGAAGAGCTTGCAGAGCTATTCTTACCATACCCACAAGAATACGACAGGGCTTGGAAAGGCTTTTGCTATAAAATGGGTGGCAAATGGTCAAAAAGTAGTATAGTTGGATGGTCTGCTATAAGGGAAAGAATAAGAAGAACTGATCCAGCAGCAGATGGGGTGGGAGCAGTATCTCGAGACCTGGAAAAACATGGGGCAATCACAAGTAGCAATACAGCAAGTACTAATGCTGACTGTGCCTGGCTAGAAGCACAAGAAGAGAGTGAGGAGGTGGGCTTTCCAGTCAGACCTCAGGTACCTTTAAGACCAACGACTTACAAAGCAGCTGTAGATCTTAGCCACTTTTTAAAAGAAAAGGGGGGACTGGAAGGGCTTATTTGGTCCAAAAAGAGACAAGAGATCCTTGATCTTTGGGTCTACAACACACAAGGCTACTTCCCCGATTGGCAGAACTACACACCAGGGCCAGGGATCAGATATCCACTTACCTTTGGATGGTGTTTCGAGCTATTACCAGTTGATCCACAGGAGGAAGAAGAGGCCACTGAGGGAGAGACCAACTGCTTGTTACACCCTATCAACCAGCATGGAATGGAGGACCCGGAGAGACAAGTGTTCAAGTGGAGATTTAACAGCAGACAAGCATTTGAGCACAAGGCCCGCCAGTTACATCCGGAGTACTACAAAGACTGCTGACACCGAGTTTTCTACAGGGGACTTTCCGCTGGGGACTTTCCAG
>D.CM.01.01CM_4412HAL_AY371157_H.CF.90.056_AF005496
GCGAGAGCGTCAATATTAAGCGGGGGAAAATTGGATGCATGGGAAAAAATTCGGTTACGGCCAGGGGGAAGCAAAAAGTATAGGCTAAAACATCTAATATGGGCAAGCAATGAGCTAGAACGATTTGCACTTAATCCTGGCCTTTTAGAGACATCAGATGGCTGTAAACAAATACTAGGCCAGCTACAACCAGCTCTTAAAACAGGAACAGAAGAACTTAGATCATTATTTAATGCAGTAGCAGTACTCTATTGTGTACATGAAAGGATAGAGGTAAAGGACACCAAGGAAGCCTTAGACAAGATAGAGGAAGAACAAAACAAAAGTAAGAAAAAAGCACAGCAAGCAGCAGCTGACACAGGGGACAACAAACAGGTCAGCCAAAATTATCCTATAGTGCAGAACTTACAGGGGCAAATGGTACACCAAGCCCTATCACCCAGAACCTTGAACGCATGGGTAAAAGTAATAGAGGAAAAGGCTTTCAACCCAGAAGTAATACCCATGTTTTCAGCATTATCAGAAGGAGCCACCCCACAGGATTTAAATACCATGCTAAACACAGTGGGGGGACATCAAGCAGCCATGCAAATGTTAAAAGAGACCATCAATGAGGAAGCTGCAGAATGGGACAGGGTACATCCAGTGCATGCAGGGCCTATTCCACCAGGCCAAATGAGAGAACCAAGGGGAAGCGATATAGCAGGAACTACTAGTACCCTTCAGGAACAAATAGGGTGGATGACAAGTAATCCACCAATCCCAGTAGGGGAAATCTATAAAAGATGGATAATCTTGGGATTGAATAAAATAGTAAGAATGTATAGCCCTGTCAGTATTTTGGATATAAGACAAGGACCAAAAGAACCCTTTAGAGACTATGTAGACCGGTTCTATAAAACTCTAAGAGCCGAGCAAGCTACACAGGAAGTAAAAAATTGGATGACAGAAACCTTGTTGGTTCAAAATGCAAACCCAGACTGTAAAACTATCTTAAAGGCGTTGGGGCCAGGGGCTACACTAGAAGAAATGATGACAGCATGTCAGGGAGTGGGAGGGCCCGGCCATAAAGCAAGAGTTTTGGCTGAGGCAATGAGCCAAGCAACAGCAGGTATGAATGCTGCAATAATGATGCAGAGGGGCAATTTTAAGGGCCCAAAGAGAATTGTTAAGTGTTTCAACTGTGGCAAAGAAGGGCACATAGCAAAAAATTGCAGGGCCCCTAGGAAAAAGGGCTGTTGGAAATGTGGAAGAGAAGGACACCAAATGAAAGATTGCACAGAAAGACAGGCTAATTTTTTAGGGAAAATTTGGCCTTCCAACAAGGGAAGGCCAGGGAACTTTCTTCAGAGCAGACCAGAGCCAACAGCCCCACCAGCAGAGAGCTTCGGGTTCGGGGAGGAGATAGCCCCCTCTCAGAAACAGGAGCAGAAAGACAAAGACCAGGAACTGTATCCTTTAACTTCCCTCAAATCACTCTTTGGCAACGACCCCTTGTCACAATAAAAATAGGGGGACAGCTAAAAGAAGCTCTGTTAGATACAGGAGCAGATGATACAGTATTAGAAGACATAAATTTGCCAGGAAAATGGAAACCAAAAATGATAGGGGGAATTGGAGGTTTTATCAAAGTAAGACAGTATGATCAGATACCTATAGAAATTTGTGGACAGAAGGCTATAGGTACAGTATTAGTAGGACCTACACCTGTCAACATAATTGGAAGAAATTTGTTGACCCAGATTGGCTGCACTCTAAATTTTCCAATTAGTCCTATTGAAACTGTACCAGTAAAATTAAAGCCAGGAATGGATGGCCCAAAAATTAAACAATGGCCATTAACAGAAGAAAAAATAAAAGCATTAACAGATATTTGTAAAGAAATGGAAAAGGAAGGAAAAATTTCAAGAATTGGGCCTGAAAATCCATACAATACTCCAATATTTGCTATAAAGAAAAAAGACAGTACTAAGTGGAGAAAATTAGTAGATTTCAGAGAACTTAATAAGAGAACTCAAGACTTCTGGGAAGTTCAATTAGGAATACCGCATCCTGCCGGGCTGAAAAAGAAAAAATCAGTAACAGTACTAGATGTAGGTGATGCATACTTTTCAGTTCCCTTAGATAAAGAGTTTAGGAAATACACAGCATTCACCATACCTAGTACAAACAATGAAACACCAGGAATTAGATATCAGTACAATGTGCTTCCACAGGGATGGAAAGGATCACCAGCGATATTCCAATGTAGTATGACAAAGATCTTAGAGCCTTTTAAAAAACAAAATCCAGAACTAATTATCTATTCATACATGGATGATTTGTATGTAGGATCTGATTTGGAAATAGGGCAGCATAGAGCAAAAATAGAAAAATTAAGAGAACATCTATTAAAATGGGGACTCACCACGCCAGATAAAAAACATCAGAAAGAACCTCCATTTCTTTGGATGGGTTATGAACTCCATCCTGATAAATGGACAGTACAGCCTATAACACTGCCAGAAAAAGAAAGCTGGACTGTCAATGATATACAGAAGCTAGTGGGAAAATTAAATTGGGCAAGCCAGATTTATCCAGGAATTAAAGTAAGGCAATTATGTAAACTCCTTAGGGGAGCTAAAGCATTAACAGAGATAATACCACTAACAAAAGAGGCAGAATTAGAACTGGCAGAAAACAAGGAAATTCTCAAAGAACCAGTACATGGAGCGTATTATGACCCATCAAAAGACTTAATAGCAGAAGTACAGAAACAAGGGGATGGCCAATGGACTTGGCAAATTTATCAAGAACCATTTAAAAATCTGAAAACAGGAAAGTATGCAAGAATGAGGAGTGCCCACACTAATGATGTAAAACAATTAACAGAGGCAGTGCAAAAAATAGCCACAGAAAGCATAGTAATATGGGGAAAGACTCCTAAATTTAGACTACCCATACAAAAGGAAACATGGGACGCATGGTGGATGGAGTATTGGCAGGCCACTTGGATTCCTGAGTGGGAGTTTGTCAATACCCCTCCTTTAGTAAAATTATGGTATCAGTTAGAAAAGGAACCCATAATAGGAGCAGAAACTTTCTATGTAGATGGGGCATCTAATAGAGACACTAAATTAGGAAAAGCAGGATATGTTACTGACAAGGGAAGACAGAAAGTTGTCTCGTTTACTAATACTACAAATCAGAAGACTGAATTACAAGCAATTAATCTAGCTTTGCAGGATTCGGGAGCAAAAGTGAACATAGTAACAGATTCACAATATGCATTAGGAATCATTCAAGCACAACCAGATAAGAGTGAATCAGAAATAGTCAATCAAATAATAGAACAGTTAATAAAAAAGGAAAAGGTCTACCTGGCATGGGTACCAGCACACAAAGGAATTGGAGGAAATGAACAAGTAGACAAATTAGTTAGTAGTGGAATCAGGAAAGTACTATTTTTGGATGGAATAAGTGAGGCTCAAGATGATCATGACAAATATCACAGCAATTGGAGAGCAATGGCTAGTGATTTTAACCTACCACCTATAATAGCAAAAGAAATAGTAGCTAGCTGTGATAAATGTCAGCTAAAAGGAGAAGCCATGCATGGACAAGTAGACTGTAGTCCAGGAATATGGCAATTAGATTGTACACATCTAGAGGGAAAAGTTATCCTGGTAGCAGTTCATGTAGCCAGTGGCTATATAGAAGCAGAAGTTATTCCATCAGAAACAGGGCAGGAGACAGCATACTTTCTCTTAAAATTAGCAGGAAGATGGCCAGTAAAAGTAGTGCATACAGACAATGGCAGCAATTTTACCAGTGCTGCCGTTAAGGCCGCCTGTTGGTGGGCAGGTATCAAGCAGGAATTCGGAATTCCCTACAATCCCCAAAGTCAGGGAGTAGTAGAATCTATGAATAATCAATTAAAGAAAATTATAGGGCAGGTAAGAGATCAAGCTGAACATCTTAAGACAGCAGTACAAATGGCAGTATTCATTCACAATTTTAAAAGAAAAGGGGGGATTGGGGGGTACAGTGCAGGGGAAAGAATAATAGACATAATAGCAACAGACATACAAACTAAAGAATTACAAAAACAAATTTCAAAAATTCAACATTTTCGGGTTTATTACAGGGACAGCAGAGATCCAATTTGGAAAGGACCAGCAAAACTTCTGTGGAAAGGTGAAGGGGCAGTAGTAATACAAGACAATAGTGACATAAAGGTAGTACCAAGAAGAAAAGCAAAAATCATTAGGGATTATGGAAAACAGATGGCAGGTGATGATTGTGTGGCAAGTAGACAGGATGAGGATTAACACATGGAAAAGTTTAGTGAAATACCATATGTATATTTCAAAGAAAGCCCAAGGATGGTTTTATAGACATCACTATGATAGCCATCACCCAAAAATAAGTTCAGAAGTACACATCCCATTAGGGGATGCTAGACTGGTAGTAACAACATATTGGGGTCTGCATACAGGAGAAAGAGAATGGCATCTGGGTCAGGGAGTCTCCATAGAGTGGAGAAAAAGGAGATATAGCACACAAATAGACCCTGGTCTGGCAGACCAACTAATTCATATGTATTACTTTGATTGTTTTACAGACTCTGCCATAAGAAAAGCCATATTAGGACATAGAGTTAGTCCTAGGTGTGAATATCCAGCAGGACATAACAAGGTAGGATCCTTGCAGTATTTGGCACTTACAGCATTAATAGCGCCAAAAAGGAAAAAACCACCTTTGCCTAGTGTTAGGAAGTTAACAGAAGATAGATGGAACAAGCCCCATCAGACCAAGGGCCACAGAGGGAGCCATACAATGAGTGGACATTAGAGCTTTTAGAGGAGCTCAAGAGTGAAGCTGTTAGACATTTTCCTAGGATATGGCTTCATGGCTTAGGACAACATATTTATGATACCTATGGGGATACCTGGACAGGAGTTGAAGCTATAATAAGAATCCTGCAACAACTGCTGTTCATTCATTTCAGAATTGGGTGTCAACATAGCAGAATAGGCATTACTCGACAGAGAAGAGCAAGAAATGGATCCAGTAGATCCTAACCTAGAGCCCTGGAACCATCCAGGAAGTCAGCCGAGTACTGCCTGTAACAATTGTTATTGTAAGAGATGTTGCTATCATTGCCTGCTTTGCTTCACTAAGAAAGGCTTAGGCGTCTCCTATGGCAGGAAGAAGAGAGGACAGCGACGAAGACCTCCTCAAGACAATCAGACTCATCAAGTTTCTGTACCAGAGCAGTAAGTAATACATGTAATGCAATCTTTAGAGATATTAGCAATAGTAGCATTGGTAGCAGCGCTAATAATAGCAATAGTTGTGTGGACCATAGTATATATAGAATATAGAAAAATAAAAAAGCAAAGGCAAATAGACCGGCTAATTGATAGAATAAGAGAAAGAGCAGAGGACAGTGGCAATGAGAGTGATGGGGATAGAGAGGAATTATCAACACTCATGGAAATGGGGCACCATGCTCCTTGGGATGTTGCTGATGACATATAGTGCAGCAGGTAATTTGTGGGTCACAGTATATTATGGGGTGCCTGTATGGAAAGAAGCAAAAACCACTCTATTTTGTGCATCAGATGCTAAATCATATAAAACAGAGGCACATAATATCTGGGCTACACATGCCTGTGTACCCACGGACCCCGATCCACAAGAATTAGTACTGGACAATGTCACAGAAAATTTTAACATGTGGAAAAATAACATGGTGGAGCAGATGCATGAGGATATAATCAGTTTATGGGATCAAAGCCTAAAACCATGTGTAAAATTAACCCCACTATGTGTCACTCTAAACTGCAGTAATCCCAACATTACTAATAACAGTAGTGCTAACAACATCAGCATTGTAAAAAAAATGAAGAACTGCTCTTTCAATACAACCACAATATTGAAGGACAAACAGAAGCAAGAATATGCACTTTTTTATATACTTGATATAGTAGGAATAGATAATAGTAGTAATAGGTTAATAAATTGTACCACCTCAGTCATCACACAGGCTTGTCCCAAGATAACCTCTGAGCCTATTCCCATACATTATTGTGCCCCAGCTGGATTTGCAATTCTAAAATGTAATGATAAGCTGTTCAATGGAACAGGCCCATGTAGAAATGTCAGCGCAGTACAATGTACACATGGAATCAAGCCAGTGGTATCAACTCAATTGCTGTTGAATGGCAGTCTAGCAGAAGAGGTCATGGTTAGATCTGAAAATCTCACAGACAATGCTAAAAACATAATAGTCCAGCTTAATAATACTATAAACATTACTTGTGTAAGGCCGAACAGCAATACAAGAAAAAGTATAAATCTAGGACCAGGGCAGGCATTCTATGCAACATATGCAACAAATATAATAGGAAACATAAGACAGGCACATTGTAATCTTAGTGCAACACAATGGAATAAAACTCTACACCAGGTAGCACAAAAATTAGGAAAGCTTCTTAACAAGACAAAAATAAATTTTAATTCATCCTCAGGAGGGGACCCAGAAATTACAACACACAGTTTTGTTTGTGGAGGAGAATTTTTCTACTGCAATACATCAGGATTGTTTAATGGAACATGGGATAATGGAACATGGACATGGAATACTAGTGCAGTACCAAATGAAACAATCACAATCCCATGTAGAATAAAACAAATTATAAACATGTGGCAGGGAGTAGGAAGAGCAATGTATGCCCCTCCCATTGAAGGACTAATTAAATGTTCATCAAATATTACAGGGTTACTGTTGACAAGAGATGGTGGCAATACTAGTGATAGTGCAGAGACTTTTAGGCCTGGAGGGGGAGATATGAGGGACAATTGGAGAAGTGAATTATATAAATATAAAGTAGTAAAAATTGAACCACTAGGAGTAGCACCCACCAGGGCAAAGAGAAGAGTGGTGGAAAGAGAAAAAAGAGCAATAGGATTAGGAGCTATGTTCCTTGGGTTCTTGGGAGCAGCAGGAAGCACGATGGGCGCAGCGTCAGTGACGCTGACGGTACAGGCCAGACAATTATTGTCTGGTATAGTGCAACAGCAAAATAATTTGCTGAGGGCTATAGAGGCGCAACAGCATCTGTTGCAACTCACGGTCTGGGGCATTAAACAGCTCCAGGCAAGAGTCCTGGCTGTGGAAAGATACCTAAAGGATCAACAGCTCCTAGGAATTTGGGGTTGCTCTGGAAAACACATTTGCACCACTAATGTACCCTGGAACTCTAGTTGGAGTAATAGATCTCTAGATGATATTTGGCAGAACATGACCTGGATGCAATGGGAGAGAGAAATTGAGAATTATACAGGTGTAATATACAGCTTAATTGAAGAATCGCAAATCCAGCAAGAAAAAAATGAAAAAGAATTATTAGAATTGGACAAGTGGGCAAGTTTGTGGAATTGGTTTAGCATATCTAACTGGCTGTGGTATATAAGAATATTCATCATGATAGTAGGAGGCTTAATAGGTTTAAGAATAGTTTTTGCTGTGCTTTCTATGGTAAGGAGAGTTAGGCAGGGATACTCACCTCTGTCGTTCCAGACCCTCCTCCCAGCCCCGAGGGGACCCGACAGGCCCGAAGGAATAGAAGAAGAAGGTGGAGAGCAAGACAGAGGCAGATCCATTCGATTGGTGAACGGATTCTCAGCACTTATCTGGGACGATCTGCGGAACCTGTGCCTCTTCAGCTACCACCGCTTGAGAGACTTAATCTTAATTGCAGCGAGGATTGTGGACCTTCTGGGACGCAGGGGGTGGGAAGCACTCAAATATCTGTGGAATCTCCTGCGATATTGGAGTCAGGAACTGAAGAATAGCGCTATTAACTTGCTTAACACCACAGCAATAGCAGTAGCTGAGGGGACAGATAGGGTTATAGAAATAATACAAAGAGCTGGTAGAGCTGTTCTCCATATACCCAGAAGAATAAGACAAGGTTTCGAAAGGGCTTTGCTATAAAATGGGTGGCAAATGGTCAAAAAGTAGCATAGTTGGCTGGCCTGCTATAAGGGAAAGAATAAGAAGAACTGATCCAGCAGCAGATGGGGTAGGAGCAGCATCCCGAGATCTGGAAAGACATGGGGCAATCACAAGTAGCAACACAGCAGCTAATAATGCTGCCTGTGCCTGGCTAGAAGCGCAAGAAGAAGAGGAGGTGGGTTTTCCAGTCACACCTCAGGTACCTGAAAGACCAGTGACTTACAAGGCAGCTGTATATCTTAGCCAATTTTTAAAAGAAAAGGGGGGACTGGAAGGGCTAGTTCACTCCCAAAAAAGACAAGATATCCTTGATCTTTGGGTCTACCACACACAAGGCTTCTTCCCTGATTGGCACAGCTACACACCAGGGCCAG
>D.KR.04.04KBH8_DQ054367_J.SE.93.SE7887_AF082394
TCTGTGGATCTACCACACACAAGGCTACTTCCCTGACTGGCATAACTACACACCAGGGCCAGGGATCAGATATCCACTGACCTTTGGTTGGTGCTTCGAGCTAGTACCAGTTGAAGCAGAGGAGGTAGAAGAGGCCAATGAAGGAGAGAACAACTGCCTGTTACACCCTATGAGCCAGCATGGAATAGAGGACCCGGAGAGACAAGTGCTAAAGTGGAGATTTAACAGCAAACTAGCATTTGAACATAAGGCCCGAATGCTGCATCCGGAGTTTTACAAAGACTGCTGACACTGAGTTTTCTACAGGGGACTTTCCGCGGGGACTTTCCAGAAGAGGCGTGACCTGGGCGGGACTGGGGAGTGGCTAGCCCTCAAATGCTGCATATAAGCAGCTGCTTTCTGCCTGTACTGGGTCTCTCTGGTTAGACCAGATCTGAGCCTGGGAGCTCTCTGGCTAGCTAGGGAACCCACTGCTTAAGCCTCAATAAAGCTTGCCTTAAGCGCCTCAAGTAGTGTATGCCCGTCTGTTGTGTAACTCTGGTAACTAGAGATCCCTCAGACCTCGTTTGTCAGTGTAAAAAATCTCTCGCAGTGGCGCCCGAACAGGGACTTGAAAGCGAAAGTAGAACCAGAGGAGCTCTCCCGACGCAGGACTTGGCTTGCTGAAGCGCGCACAGCAAGAGGCGAGGGGTAGCGACTGGTGAGTACGCTAAAAATTTTTTGACTAGCAGAGGCTAGAAGGGGAAAGATGGGTGCAAGAGCGTCTGTATTAAGCGGGGGAAAATTAGATACATGAGAAAAAATTCGGTTACGGCCAGGAAGAAAAAAAATGTACAAACTGAAACATATAGTATGGGCAAGCAGGGAGCTAAAACGATTTGCACTTAATCCTGGCCTTTTAGAGACATCAAAAGGCTGTAGACAAATAATAGGACAGCTACAACCATCTATACAGACAGGATCAGAAAAACTTAAATCATTATTTAATACAGTAGCAACCCTCTATTGTGTACATGAAAGAATAAATGTAAAGGACACCAAGGAAGCTTTAGACAAAATAGAGGAGGAACAAAACAAAAGTAAAAAAAAAGCACAGCAAGCAACAGCTGACACAAAAAACAACAGCCAGGTCAGCCAAAATTATCCTATAGTGCAAAACCTACAGGGGCAAATGGTACACCAGCCCCTATCACCTAGAACTCTGAACGCATGGGTAAAAGTAGTAGAAGAGAAGGCTTTCAATCCAGAGGTAATACCCATGTTTACAGCATTATCAGAAGGAGCCACCCCACAAGATTTAAATTCCATGCTAAACGCAGTGGGGGGACATCAGGCAGCCATGCAAATGTTAAAAGAGACCATCAATGAGGAAGCTTCAGAATGGGATAGGCTGCATCCAGTGCATGCAGGGCCCATTGCACCAGGTCAACTGAGAGAACCAAGGGGAAGTGATATAGCAGGAACTACTAGTACCCTTCAGGACCAAATAGGATGGATGACAAGCAACCCACCTATCCCAGTAGGAGAAATCTATAAAAGATGGATAATCCTGGGATTAAATAAAATAGTAAGAATGTATAGTCCTGTTGGCATTTTGGACATAAAACAAGGACCAAAAGAACCCTTTAGAGACTATGTAGATCGGTTCTATAAAACTCTAAGAGCCGAGCAAGCTTCACAGGAGGTAAAAAATTGGATGACCGAAACCTTGTTGGTCCAAAATGCGAACCCAGATTGTAAGACTATCTTAAAAGCATTGGGAGCAGGAGCTTCATTAGAAGAAATGATGACAGCATGTCAGGGAGTGGGGGGACCCAGTCATAAAGCAAGAGTTTTGGCTGAAGCAATGAGCCAAGCAACAAGTTCAAATGCAGCCATAATGATGCAGAGAGGCAATTTTAAGGGCCCAAGAAAAATAGTTAAGTGTTTCAATTGTGGCAAAGAAGGACACATAGCAAAAAATTGCAGGGCCCCTAGAAAAAGGGGCTGTTGGAAATGTGGAAAGGAAGGACACCAAATGAAAGATTGCACTGAAAGACAGGCTAATTTTTTAGGGAAGATCTGGCCTTCCCACAATGGAAGGCCAGGAAACTTCCCTCAGAGCAGAACAGAGCCAACCGCCCCACCAGCAGAGAGCTTCGGGTTTGGGGAGGAGATAACCCCCTCTCAGAAACGGGAGCAGAAAGACAACGAACTGTATCCCTTGGATTCCCTCAAATCACTCTTTGGCAACGACCCCTTGTCAAAGTAAAGATAGGGGGACAGATAAAGGAAGCTCTATTAGATACAGGAGCAGATGATACAGTATTAGAAGACATAGAATTGCCAGGAAAATGGAAACCAAAAATGATAGGGGGAATTGGAGGTTTTATTAAAGTAAGACAGTATGATCAAATACTCATAGAAATCTGTGGACATAAAGCTATAGGTACAGTATTAGTAGGACCTACACCTGTCAACATAATTGGAAGGAATCTGTTGACTCAGATTGGCTGCACTTTAAATTTTCCAATTAGTCCTATTGAGACTGTACCAGTAAAGTTAAAGCCAGTGATGGATGGGCCAAGAGTTAAACAATGGCCATTGACAGAAGAAAAAATAAAAGCATTAACAGAAATTTGTACAGAGATGGAAAAGGAAGGAAAAATTTCAAGAATTGGGCCTGAAAATCCATACAATACACCAGTATTTGCCATAAAGAAAAAGGACAGTACTAAGTGGAGAAAATTAGTAGATTTCAGAGAACTTAATAAAAGAACTCAAGACTTCTGGGAAGTTCAGTTAGGAATACCGCACCCTGCAGGGCTAAAAAAGAAAAAATCAGTAACAGTACTGGATGTGGGTGATGCATATTTCTCAGTTCCCTTAGATGAAGACTTTAGAAAGTATACCGCATTCACCATACCTAGTATCAACAATGAGACACCAGGGATTAGATATCAGTACAATGTGCTTCCACAGGGATGGAAAGGATCACCAGCAATATTCCAAAGTAGCATGACAAAAATCTTAGAGCCCTTTAGAAAACAAAATCCAGAAATAGTTATATATCAATACATGGATGATCTGTATGTAGGATCTGACTTAGAAATAGGGCAGCATAGAGCAAAAATAGAGAAATTAAGGGAACATCTGTTGAAGTGGGGATTGACCACACCAGACAAAAAACATCAGAAGGAGCCTCCATTTCTTTGGATGGGTTATGAACTCCATCCTGATAAATGGACAGTACAGCCTATAACACTACCAGAAAAAGAAAGCTGGACTGTCAATGATATACAGAAGTTAGTGGGAAAATTAAATTGGGCAAGTCAAATTTATGCAGGAATTAAAGTAAAACAGTTGTGTAAACTCCTCAGGGGAGCCAAAGCACTGACAGAAGTAATACCACTGACAAAAGAAGCAGAATTAGAACTGGCAGAAAACAGGGAGATTCTAAAAGAACCAGTACATGGAGTGTATTATGATCCATCAAAAGACTTAATAGCAGAATTACAGAAACAAGGGCAAGGCCAATGGACATATCAAATATATCAAGAGCCATTTAAAAATTTGAAGACAGGAAAGTATGCAAAAATGAGGGGTACCCACACTAATGATGTAAAACAATTAACAGAGGCAGTGCAAAAAATAGCCCAAGAAAGCATAGTAATATGGGGAAGGACTCCTAAATTTAGATTACCCATACAAAAGGAAACATGGGAAGCATGGTGGACAGAATATTGGCAGGCCACCTGGATTCCTGAGTGGGAGTTTGTCAACACCCCTCCTTTAGTAAAATTATGGTACCAGTTAGAGAGGGAACCCATAATAGGAGCAGAAACTTTCTATGTAGATGGGGCAGCTAATAGAGAGACTAGATTAGGAAGAGCAGGATATGTTACTGACAGAGGAAGACAAAAAGTTATCCCTTTAACTGACACAACAAATCAGAAGACTGAGTTACAAGCAATTAATCTAGCTTTGCAGGATTCGGGATTAGAAGTAAACATAGTAACAGATTCACAATATGCCTTAGGAATCATCCAAGCACAACCAGATAAGAGTGAATCAGAGTTAGTCAGTCAAATAATAGAACAGTTAATAAAAAAGGAAAAGGTCTACCTGGCCTGGGTACCAGCACACAAAGGAATTGGAGGAAATGAACAGGTAGATAAATTAGTCAGTTCTGGAATCAGGAAAGTGCTGTTTCTAGATGGGATAGATAAAGCTCAAGAAGACCATGAGAAATATCACAGCAATTGGAGAGCAATGGCTAGTGAGTTTAACCTGCCACCTGTGGTAGCAAAAGAAATAGTAGCTTGCTGTGATAAATGTCAGCAAAAAGGAGAAGCCATGCATGGACAAGTAGACTGTAGTCCAGGAATATGGCAATTAGATTGTACCCATCTAGAAGGAAAAGTTATCCTGGTAGCAGTTCATGTAGCCAGTGGCTATATAGAAGCAGAAGTTATTCCAGCAGAAACAGGACAGGAAACAGCATACTTTCTCTTAAAACTAGCAGGAAGATGGCCAGTAAAAGTGATACATACAGACAATGGCAGCAATTTCACCAGTGCTGTAGTTAAGGCCGCCTGTTGGTGGGCAGGCATCAAGCAGGAATTTGGAATTCCCTACAATCCCCAAAGTCAAGGAGTAGTAGAATCTATGAATAAAGACTTAAAGAAAATTATTGGACAGGTAAGAGAGCAGGCTGAGCATCTTAAGACAGCAGTACAAATGGCAGTATTCATCCACAATTTTAAAAGAAAAGGGGGGATTGGGGGGTACAGTGCAGGGGAAAGAATAATAGACATAATAGCAACAGACATACAAACTAGAGAATTACAAAAACAAATTACAAAAATACAAAATTTTCGGGTTTATTACAGGGACAGCAGAGACCCAATTTGGAAAGGACCAGCAAAACTGCTCTGGAAAGGTGAAGGGGCAGTAGTAATACAAGACAGTAGTGACATAAAAGTAGTACCAAGAAGAAAAGCAAAGATCATTAGGGATTATGGAAAACAGATGGCAGGTGATGATTGTGTGGCAAGTAGACAGGATGAGGATTAATACATGGAAAAGTTTAGTAAAATACCATATGTATATTTCAAAGAAAGCTAGAGGATGGGTTTATAGGCATCACTATGACAGCAATCATCCAAGAATAAGCTCAGAAGTACACATCCCACTAGGAGATGCAAAATTAGTAGTGACAACATATTGGGGTCTGAATACAGGAGAAAGAAAGTGGCATCTGGGTCAGGGGGTCTCCATTGAATGGAGACTGAAAAGGTACAGAACACAAATAGACCCTGGCCTGGCAGATCAACTAATTCATATGCATTACTTTGATTGTTTTTCAGACTCTGCCATAAGGAAAGCCATATTAGGACATAGAGTTAGCCCTAGGTGTGATTATCAAGCAGGACATAACAAGGTAGGATCTCTACAGTATTTGGCATTAACAGCATTAATAACACCAAAAAGGATAAAGCCACCTTTGCCTAGTGTTAGGAAGTTAACAGAAGATAGATGGAACAAGCCCCAGGAGACCAAGGGCCGCAGAGGGAGCCCTACAATGAATGGGCATTGGAGCTTTTAGAAGAGCTTAAGAGTGAAGCTGTTAGACATTTTCCTAGGCCATGGCTTCATGACTTAGGACAACATATCTATGCAACTTATGGGGATACCTGGGTAGGAGTTGAAGCTCTACTAAGAGTTCTGCAACAACTATTGTTTGTCCATTTCAGAATTGGGTGTCAACATAGCAGAATAGGCATTATTCGGCAGAGAAGAGCAAGAAATGGATCCAGTAGATCCTAACCTAGAGCCCTGGAAACATCCAGGAAGTCAGCCTAGGACTGCTTGTAACAATTGCTATTGTAAAAAGTGTTGCCTTCATTGCCAAGTTTGCTTCTTAAAGAAAGGCTTAGGCATCTCCTATGGCAGGAAGAAGCGGAGACAGCGACGAAGACCTCCTCAAGGCGATCAGGCTCATCAAGTTCCTCTATCAAAGCAGTAAGTAACATATGTGATGCAACCTGTAGTGATAGCAATAGKAGCATTAGTAGTAACGCTAATAATAGCAATAATTGTGTGGACCATAGTTTTCATAGAGTGCTGTAGATTAAGAAAGCAAAGAAAGATAGACAGGTTAATTAATAGAATAAGAGAAAGAGCAGAAGATAGTGGCAATGAGAGTGAGGGGGATGAAGAGGAATTATCAACACTTATGGAAATGGGGCACCATGCTCCTTGGAATGTGGATGATTTGTAGTGCTGCAGGAAACTTGTGGGTCACAGTTTATTATGGGGTACCTGTGTGGAAAGAAGCAACCACCACTCTATTTTGTGCATCGGATGCTAACTCACTTAAAGCAGAGGCACATAATATCTGGGCCACACATGCTTGTGTACCCACGGATCCCAGCCCACAGGAGGTAGTACTGGCAAATGTCACAGAGAACTTAACATGTTGGAAAAATAACATGGTGGACCAGATGCATGAGGATATAATCAGTTTATGGGAGCAAAGCCTAAAACCATGTGTAAAATTAACCCCACTCTGTGTCACTTTAAACTGTACTGATATCCGGAATAAGACTATCAACAACAACAGCACTGGCGAAATGAAAAACTGCTCTTTCAATGTAACTACAGTGGTAAGGGATAAGAAGAAGCAAGAATATGCACTTTTTTATAGACTTGATATAGTACCAATGGATAATGATAATACCAGTTATAGATTAATAAACTGTAATACCTCAACCGTTACACAGGCTTGTCCAAAGATATCCTTTGAACCAATTCCTATACATTATTGTGCCCCAGCTGGTTTTGCAATTCTAAAGTGTAACAATAAAACATTCAATGGAACAGGCCCATGCACAAATGTCAGCACAGTACAATGTACACATGGAATTAAGCCAGTGGTATCAACTCAACTGCTGTTAAATGGCAGTCTAGCAGAAAAGGAAATAATAATTAGATCTGAAAATCTCACAAACAATGCTAAAAACATAATAGTACAGCTTAATGTATCTGTACCAATTAAATGTGAAAGGCCCAACAACAATACAAGACGAGGTATACATATAGCACCAGGACAAGCACTCTTTGCAACAACAAATGTAATAGGAGATATAAGAAGAGCACATTGTAATATCAGTAGCACAAAATGGAATGAAACTTTACAACAGTTAGCAAAAAAATTAGGAGACCTCTTTAACAAGACAGAAATAAATTTTAAGCCATCTTCAGGAGGGGACCTAGAGATTACAACACACAGTTTTGTTTGTGGAGGGGAATTTTTCTACTGCAATACATCAGGACTGTTTAATAGTACCTGGATGGTTAATAGTACAGTGAATCAGACAGGGTTAAATAATAGTACAATCACACTCCAATGCAGAATAAAACAAATTATAAACATGTGGCAAGAAGTAGGAAGAGCAATGTATGCCCCTCCCATTGAAGGAGTAATCAAATGTTCATCAAACATTACAGGGCTAATATTGACAAGAGATGGTGCAAATAATAATACGAATGAGACTTTCAGACCTGGAGGAGGAAATATGAAAGACAATTGGAGAAGTGAACTATATAAATATAAAGTAGTACAAGTTGAACCAATAGGACTAGCACCTACCAAGGCAAAGAGAAGAGTGGTGGAAAGGGAAAAAAGAGCAATAGGGCTAGGAGCTATGTTCCTTGGGTTCTTGGGAGCAGCAGGAAGCACAATGGGCGCAGCGTCAGTGACGCTGACGGTACAGGCCAGACAGTTATTGTCTGGTATAGTGCAACAGCAAAACAATTTGCTGAGGGCTATAGAGGCGCAACAGCATCTGTTGCAACTCACGGTCTGGGGCATTAAACAGCTCCAGGCAAGAGTCCTGGCTCTAGAAAGATACCTAAAGGATCAACAGCTCCTAGGAATTTGGGGTTGCTCTGGAAAACTCATTTGCACCACTACTGTGCCTTGGAACTCTAGTTGGAGCAATAGATCTGTAGATACAATTTGGGATAACATGACCTGGATGCAGTGGGAAAGAGAAATTGACAATTACACAGGCATAATATATGACTTACTTGAAGAATCACAAAACCAGCAAGAAAAGAATGAAAAAGACTTGTTGGAATTGGACAAATGGGCAAGTTTGTGGAATTGGTTTAGCATAACAAGATGGTTGTGGTATATAAAAATATTTATAATAATAGTAGGAGGCTTGATAGGTTTAAGAATAATTTTTGCTGTGCTTTCTTTAGTGAATAGAGTTAGGCAGGGATACTCACCTCTGTCGTTTCAGACCCCCTTCCCAGCCCCGAGGGGACCCGACAGGCCCGAAGGAACAGAAGAAGGAGGTGGAGAGCAAGACAGAGGCAAATCAATTCGATTGGTGAGCGGATTATCAGCACTTATCTGGGACGATCTGCGGAACCTGTGCCTCTTCAGCTACCACCGATTGAGAGACTTACTATTAATTGCAACGAGGATTGTGGAACTTCTGGGACGCAGGGGGTGGGAAGCAGTCAAGTATCTGGGGAATCTTCTGCAATATTGGATACAGGAACTAAAGAATAGTGCTATTAGATTGTTTGATGCCACAGCAATAGCAGTAGCTGAGGGGACAGATAGGGTTATAGAAGTAGTACGAAGAGCTTTTAGAGCTGTTCTTCACATACCTAGAAGAATAAGACAGGGCTTCGAAAGGGCTTTGATATAACATGGGTGGCAAATGGTCAAAATGGCCTGCTATAAGGGAAAGAATGAGAAGAACTGAGCCAGCAGCAGATGGGGTAGGAGCAGCATCTCGGGACCTGGAAAGACATGGGGCAATCACAAGTAGAAATACAGCAGCTACTAATGCTGATTGTGCCTGGCTAGAAGCACAAGAAGAAGA
>D.UG.99.99UGA07412_AF484477_K.CM.96.MP535_AJ249239
GCGAGAGCGTCAGTGTTAAGTGGGGGAAAATTAGATGAATGGGAAAGAATTCGGTTACGGCCAGGGGGAAACAAAAGATATAAACTAAAACATATAGTATGGGCAAGCAGGGAGCTAGAGCGATTTGCACTTAATCCTGGCCTTTTAGAAACATCAGAAGGCTGTAAACAAATATTGGGACAGCTACAACCAGCTATTCAGACAGGATCAGAAGAACTTAAATCATTATATAATACAGTAGCAACCCTCTATTGTGTACATGAGAGGCTAAAGGTAACAGACACCAAGGAAGCTTTAGACAAAATAGAGGAAGAACAAACCAAAAGTAAGAAAAAAGCACAGCAAGCAACAGCTGACACAAAAAACAGCAGCCAGGTCAGCCAAAATTATCCTATAGTACAAAACCTACAGGGGCAAATGGTACACCAGGCTATATCACCTAGAACGTTGAACGCATGGGTAAAAGTAATAGAGGAGAAGGCTTTCAGCCCAGAAGTAATACCCATGTTTTCAGCATTATCAGAAGGAGCCACCCCACAAGATTTAAACACCATGCTAAACACAGTGGGGGGACATCAGGCAGCCATGCAGATGTTAAAAGAGACCATCAATGAGGAAGCTGCAGAATGGGATAGGTTACATCCAGTACATGCAGGGCCTATTGCACCAGGACAAATGAGAGAACCAACRGGAAGTGATATAGCAGGAACTACTAGTACCCTTCAGGAACAAATAGGATGGATGACCAGCAATCCACCTATCCCAGTAGGAGAAATCTATAAAAGATGGATAATCCTAGGATTAAATAAAATAGTAAGGATGTATAGCCCTGTCAGYATTTTGGACATAAAACAAGGGCCAAAGGAACCCTTTAGAGACTATGTAGATCGGTTCTATAAAACTCTAAGGGCCGAGCAAGCTTCACAGGAGGTAAAAGGTTGGATGACCGAAACCTTGTTGGTCCAAAATGCAAACCCAGATTGTAAAACCATCTTAAAAGCATTGGGACCAGCGGCTACATTAGAAGAAATGATGACAGCATGTCAGGGAGTGGGGGGACCCGGTCATAAAGCAAGAGTTTTGGCTGAGGCAATGAGTCAAGTCTCAACAAATACTGCTATAATGATGCAGAGAGGCAATTTTAAGGGCCCAAAGAAAAGCATTAAGTGTTTTAACTGTGGCAAAGAAGGTCACACAGCAAAAAACTGTAGAGCTCCTAGGAAAAGGGGCTGTTGGAAATGTGGAAGGGAAGGACATCAAATGAAAGATTGCACTGAAAGACAGGCTAATTTTTTAGGGAAAATTTGGCCTTCCCACAAGGGAAGGCCAGGGAATTTCCTTCAGAACAGACCAGAGCCAACAGCCCCACCAGAAGAAAGCTTCGGGTTTGGGGAAGAGATAACACCCTCTCAGAAACAGGAGAAGAAAGACAAGGAGCTGTATCCTGTAGCTTCCCTCAAATCACTCTTTGGCAACGACCCCTTGTCACAATAAAGATAGGGGGACAGCTAAAGGAAGCTCTACTAGATACAGGAGCAGATGATACAGTATTAGAAGAAATAAATTTGCCAGGAAAATGGAAACCAAAAATGATAGGGGGAATTGGAGGCTTTATCAAAGTAAGACAGTATGAGCAAATACTTGTAGAAATCTGTGGACAGAAAGCTATAGGTACAGTATTAGTAGGGCCTACACCTGTCAACATAATTGGAAGAAATTTGTTGACTCAGATTGGTTGCACTTTAAATTTTCCAATTAGTCCTATTGAAACTGTACCAGTAAAATTAAAGCCAGGGATGGACGGTCCAAAAGTTAAACAATGGCCATTGACAGAAGAAAAGGTAAAAGCACTAATAGAAATTTGTACAGAAATGGAAAAGGAAGGAAAAATTTCAAGAATTGGGCCTGAAAATCCATACAATACTCCAATATTTGCCATAAAGAAAAAGGACAGTACTAAGTGGAGAAAATTAGTAGATTTCAGGGAACTTAATAAGAGAACTCAAGACTTCTGGGAAGTTCAACTAGGAATACCACATCCTGCGGGGCTAAAAAAGAAAAAATCAGTAACAGTACTGGATGTGGGTGATGCATATTTTTCAGTTCCCTTATATGAAGATTTTAGAAAATATACTGCATTCACCATACCTAGTATAAACAATGARACACCAGGAATTAGATATCAGTACAATGTGCTTCCACAAGGGTGGAAAGGATCACCAGCAATATTCCAAAGTAGCATGACAAAAATCTTAGAACCTTTTAGAAAACAAAATCCAGAAATGGTTATATACCAATACATGGATGATTTATATGTAGGGTCTGACTTAGAAATAGGGCAACCTAGAACAAAAATAGAGGAACTAAGAGAACATCTATTGAAATGGGGATTTACCACACCAGACAAAAAGCATCAGAAAGAACCTCCATTTCTTTGGATGGGTTATGAACTCCATCCTGATAAATGGACAGTACAGTCTATAAAACTGCCAGAACAAGAAAGCTGGACTGTCAATGATATACAGAAGYTAGTGGGAAAATTAAATTGGGCAAGYCAGATTTATCCAGGAATTAAGRTAAGACAATTATGCAAATGCATTAGGGGTRCCAAAGCACTGACAGAAGTAGTACCACTGACAGAAGAAGCAGAATTAGAACTGGCAGAAAACAGGGAAATTCTAAGAGAACCAGTACATGGAGTGTATTATGACCCATCAAAAGACTTAATAGCAGAGATACAGAAACAAGGGCAAGACCAGTGGACATACCAAATTTATCAAGAACAATATAAAAATCTGAAAACAGGAAAGTATGCAAAAGTGAGGGGTACCCACACTAATGATGTAAAACAATTAACAGAGGCAGTACAAAAAATAACCCAAGAATGTATAGTGATATGGGGAAAGCCTCCTAAATTTAGACTACCCATACAAAAAGAAACATGGGAAATATGGTGGACAGAGTATTGGCAGGCCACCTGGATTCCTGAGTGGGAGTTTGTCAATACCCCTCCTTTAGTTAAATTATGGTACCARTTAGAGAAGGAACCCATAGTAGGAGCAGAAACTTTCTATGTAGATGGGGCAGCTAATAGAGAGACTAAATTAGGAAAAGCAGGATATGTTACTGATAGAGGAAGACAGAAAGTTGTCTCTCTAACTGACACCACAAATCAGAAGACTGAATTACAAGCCATTAATCTGGCTTTGCAGGATTCAGGATTAGAAGTAAACATAGTAACAGACTCACAATATGCATTAGGAATCATTCAAGCACAACCAGATAAGAGTGAATCAGAGTTAGTCAGTCAAATAATAGAGCAGTTAATAAAAAAGGAAAAGGTCTACCTCTCATGGGTACCAGCCCACAAAGGGATTGGAGGAAATGAACAAGTAGATAAATTAGTCAGTAATGGAATCAGRAAAATACTATTCTTGGATGGAATAGATAAGGCTCAAGAGGAACATGAAAAATACCACAACAATTGGAGAGCAATGGCTAGTGATTTTAACCTGCCACCGGTGGTAGCAAAAGAAATAGTAGCTAGCTGTGATAAATGCCAGCTAAAAGGAGAAGCCTTGCATGGACAAGTAGACTGTAGTCCAGGGATATGGCAATTAGATTGTACACATTTAGAAGGAAAAGTTATCCTGGTAGCAGTCCATGTAGCCAGTGGCTATATAGAAGCAGAGGTTATTCCAGCAGAAACAGGACAKGAAACAGCCTACTTTCTCTTGAAACTAGCAGGAAGGTGGCCGGTAAAAGTAGTACATACCGACAATGGCAGCAACTTCACCAGCGCTGCAGTTAAGGCCGCCTGCTGGTGGGCAGACATCAAGCAGGAATTTGGAATTCCCTACAATCCCCAAAGTCAAGGAGTAGTAGAATCTATGAATAAAGAATTAAAGAAGATTATAGGACAGGTAAGAGATCAAGCTGAACATCTGAAGACAGCAGTACAAATGGCAGTATTCATTCACAATTTTAAAAGAAAAGGGGGGATTGGGGGGTACAGTGCAGGGGAAAGAATAATAGACATAATAGCAACAGATATACAAACTAAAGAATTACAAAAACAAATCACAAAAATTMRAAATTTTCGGGTTTATTACAGGGACAGCAGAGATCCAATTTGGAAAGGACCAGCAAAGCTTCTCTGGAAAGGTGAAGGGGCAGTAGTAATACAAGACAATAGTGAAATAAAAGTAGTACCAAGAAGAAAAGCAAAGATCATTAGGGAYTATGGAAAACAGATGGCAGGTGATGATTGTGTGGCAAGTAGACAGGATGAGGATTAGAACATGGCATAGTTTAGTAAAACATCACATGTATGTGTCAAAGAAAGCTCAAGGATGGTTGTATAGACATCACTATGACTGCCTACACCCAAAAATAAGTTCAGAAGTACACATCCCACTAGGAGAAGCTAGACTGGTAGTAAAAACATACTGGGGTCTGCATACAGGAGAAAGAGAATGGCATCTGGGTCAGGGAGTCTCCATAGAGTGGAGGAAAAGGAGATATAGCACACAAGTAGACCCTGGCCTGGCAGACCAACTAATTCATATATATTATTTTGATTGTTTTGCAGAATCTGCTATAAGAAAAGCCATATTAGGACATATAGTTACTCCTAGGTGTAATTATCAAGCAGGACATAATAAGGTAGGATCTTTACAATATTTGGCACTAACAGCATTAGTAACACCAAAAAAGATAAAGCCACCTTTGCCTAGTGTTAGGAAGCTGACAGAAGACAGATGGAACAAGCCCCAGAGGACCAAGGGCCACAGAGGGAGCCATACAATGAATGGACATTAGAGCTTTTAGAGGAGCTTAAGAGTGAAGCTGTTAGACACTTTCCTAGAGTGTGGCTTCATGGCCTAGGACAATATATCTATGAAACTTATGGGGATACCTGGACAGGAGTTGAAGCTATAATAAGAATCCTTCAACAACTACTGTTTATCCATTTCAGAATTGGGTGTCACCATAGCAGAATAGGCATCACTCGACAGAGAAGAATAAGAAATGGATCCAGTAGATCCTAACCTAGAGCCCTGGAACCATCCAGGAAGTCAGCCTAGGACTGCTTGTAATAAGTGTTATTGTAAAAAGTGTTGCTATCATTGCCAAGTTTGCTTCATAACAAAAGGCTTAGGCATCTCCTATGGCAGGAAGAAGCGGGGACAGCGACGAAGACCTCCTCAAAGCGATCAGGCTCATCAAGATCCTATACCAAAGCAGTAAGTAGTACATGTAATGCAACCTTTAGCCATATTAGCAATAGTAGCATTAGTAGTAGCACTAATACTAGCAATAGTAGTGTGGACTATAGTATTCATAGAGTGTAGAAGATTAAGAAGGCAAAAAAGAATAGACTGGTTAATTGATAGAATAGCAGAAAGAGCAGAAGATAGTGGCAATGAGAGTGARGGAGACAGTGAGGAATTATCAGCACTTGTGGAGATGGGGCATCATGCTCCTTGGGATGTTAATGATATGTAGTGCTGCAGACCAGCTGTGGGTCACAGTGTATTATGGGGTACCTGTGTGGAAAGAAGCAACCACTACTCTATTTTGTGCATCAGATGCTAAAGCACATAAAGCAGAGGCACAYAATATCTGGGCTACACATGCCTGTGTACCAACAGACCCCAATCCACGAGAAATGATACTAGGAAATGTCACAGAAAAYTTTAACATGTGGAAGAATAACATGGTAGAGCAGATGCATGAGGATATAATCAGTTTATGGGATCAAAGTCTAAAACCATGTGTAAAATTAACCCCACTCTGTGTTACTTTAAACTGCACTACATATTGGAATGRAACTTTACAGGGGAATGAAACTAAAGGGAAGAATAGAAGTGACATAATGACATGCTCTTTCAATATAACCACAGAAATAAGAGATAGAAAGAAGCAAGAAACTGCACTTTTTTATAAACTTGATGTGGTACCACTAGAGGATAAGGATAGTAATAAGACTACCAAYTATAGCAGCTATAGATTAATAAATTGCAATACCTCAGTCGTGACACAGGCGTGTCCAAAAGTAACCTTTGAGCCAATYCCCATACATTATTGTGCCCCAGCTGGATTTGCGATTCTGAAATGTAATAATAAGACGTTCAATGGAACGGGTCCATGCAAAAATGTCAGCACAGTACAGTGTACACATGGAATTAGGCCAGTAGTGTCAACTCAACTGTTGTTGAATGGCAGTCTAGCAGAAGAAGAGATAATAATTAGATCTGAAAATATYWCAAATAATGCAAAAACCATAATAGTACAGCTTAATGAGTCTGTAACRATTGATTGCATAAGGCCCAACAACAATACAAGAAAAAGTATACGCATAGGACCAGGGCAAGCACTCTATACAACAGACATAATAGGGAATATAAGACAAGCACATTGTAATGTTAGTAAAGTAAAATGGGGAAGAATGTTAAAAAGGGTAGCTGAAAAATTAAAAGACCTTCTTAACCAGACAAAGAACATAACTTTTRAACCATCCTCAGGAGGGGACCCAGAAATTACAACACACAGCTTTAATTGTGGAGGGGAATTTTTCTACTGCAATACATCAGGACTATTTAATGGGAGTCTGCTTAATGAGCAGTTTAATGAGACATCAAATGATACTMTCACACTCCAATGCAGAATAAAACAAATTATAAACATGTGGCAAGGAGTAGGAAAAGCAATGTATGCCCCTCCCATTGCAGGACCAATCAGCTGTTCATCAAATATTACAGGACTATTGTTGACAAGAGATGGTGGTAATACTGGTAATGATTCAGAGATCTTCAGACCTGGAGGRGGAGATATGAGAGACAATTGGAGAAGTGAATTATACAAATATAAAGTAGTAAGAATTGAACCAATGGGTCTAGCACCCACCAGGGCAAAAAGAAGAGTGGTGGAAAGAGAAAAAAGAGCAATAGGACTGGGAGCTATGTTCCTTGGGTTCTTGGGAGCGGCAGGAAGCACGATGGGCGCAGCGTCACTGACGCTGACGGTACAGGCCAGACAGTTATTGTCTGGTATAGTGCAACAGCAAAACAATTTGCTGAGAGCTATAGAGGCGCAACAGCATCTGTTGCAACTCACAGTCTGGGGCATTAAACAGCTCCAGGCAAGAGTCCTGGCTATGGAAAGCTACCTAAAGGATCAACAGCTCCTAGGAATTTGGGGTTGCTCTGGAAAACACATTTGCACCACTACTGTGCCCTGGAACTCTACCTGGAGTAATAGATCTGTAGAGGAGATTTGGAATAAYATGACCTGGATGCAGTGGGAAAGAGAAATTGAGAATTACACAGGTTTAATATACACCTTAATTGAAGAATCGCAAACCCAGCAAGAAAAGAATGAACAAGAACTATTGCAATTGGATAAATGGGCAAGTTTGTGGAATTGGTTTAGTATAACAAAATGGCTGTGGTATATAAAAATATTCATAATGATAGTAGGAGGCTTAATAGGTTTAAGAATAGTTTTTGCTGTGCTTTCTTTAGTAAATAGAGTTAGGCAGGGATATTCACCTCTGTCTTTTCAGACCCTCCTCCCAGCCCCGAGGGGACCCGACAGGCCCGAAGGAATAGAAGAAGAAGGTGGAGAGCAAGGCAGAGGCAGATCAATTCGATTGGTGAACGGATTCTCAGCACTTATCTGGGACGATCTGAGGAACCTGTGCCTCTTCAGCTACCACCGCTTGAGAGACTTAATCTTAATTGTAACGAGGATTGTGGAACTTCTGGGACGCAGGGGGTGGGAARCCATCAAATATCTGTGGAATCTCCTACAGTATTGGATCCAGGAACTAAAGAATAGTGCTATTAGCTTGCTTAATACCACAGCAATAGTAGTAGCTGAGGGGACAGATAGGGTTATAGAAATAGTACAAAGAGCTGTTAGAGCTGTTCTTAACATACCCAGACGTATAAGACAGGGCTTCGAAAGGGCTTTAATATAAAATGGGTGGCAAATGGTCAAAAAGTAGTATAGTGGGATGGCCYGCTGTAAGGGAAAGAATRAGAAGAACTGAGCCAGCAGCAGAGGGGGTGGGAGCAGTATCTCGGGACCTGGATAGGCATGGGGCAATCACAAGTAGCAATACAACCCATACTAATCCTGACTGTGCCTGGCTAGAAGCACAAGAAGAGGGCGGGGAAGTAGGTTTTCCAGTCAGACCTCAGGTACCGTTAAGACCAATGACTTACAAGGGAGCTYTAGATCTGAGCCACTTTTTAAAAGAAAAGGGGGGACTGGAAGGGTTAATTTGGTCCAGAAAAAGACAAGAGATCCTTGATCTTTGGGTCTATCACACACAAGGTTACTTCCCTGATTGGCAAAACTACACACCAGGGCCAGGGATTAGATATCCACTGACCTTTGGATGGTGCTTCGAGCTAGTACCAGTTGATCCAAAGGAAATAGAAGAGGACACTGAAGGAGAGAACAACTGCTTGTTACACCCTATGAGCCAGCACGGAATGGAGGACACGGAGAGAGAAGTGTTAAAATGGAGATTTAACAGCAGACTAGCATTTGAGCACAAGGCCCGCCAGATGCATCCGGAGTTCTACAAAGACTGCTGACACCGAGTTTTCTACAAGGGACTTTCCGCTGGGGACTTTCCAAGGAGGAGTAACAGGGGCGGGACTGGGAGTGGCTAACCCTCAGATGCTGCATATAAGCAGCTGCTTTTTGCCTGTACTGGGTCTCTCTTGTTAGACCAGATTTGAGCCTGAGAGCTCTCTGGCTAGCTAGGGAACCCACTGCT
>F1.FR.96.MP411_AJ249238_F2.CM.02.02CM_0016BBY_AY371158
ATGGGTGCGAGAGCGTCAGTATTAAGCGGGGGAAAATTAGATGCATGGGAAAGAATTCGATTAAGACCGGGGGGAAAGAAAAAATATAGAATGAAGCATCTAGTATGGGCAAGCAGGGAGTTAGAACGATTTGCAGTTGATCCTGGACTTCTAGAAACACCAGAAGGCTGTAAGCAAATAATAAGACAGCTACAACCATCCCTTCAGACAGGATCAGAAGAGCTTAGATCATTGTTCAATACAGTAGCAGTTCTCTATTGTGTACATCAAAAGATAGAGATAAAGGACACCAAGGAAGCTTTAGAGAAGTTAGAGGAGGAACAAAACAAAGGTCAGCAAAAGACACAGCAAGCGGCAGCTGACAAAGGAGTCAGTCAAAATTACCCTATAGTACAAAATCTTCAGGGACAGATGGTACATCAGCCTATATCACCTAGAACTTTAAATGCATGGGTAAAAGTGATAGAAGAGAAGGCTTTTAGCCCAGAAGTAATACCCATGTTCTCAGCATTATCAGAAGGGGCCACCCCACAAGATTTAAACACCATGCTAAATACAGTGGGTGGACATCAAGCAGCCATGCAAATGTTAAAAGACACCATCAATGAGGAAGCTGCAGAATGGGACAGATTACATCCAGCGCATGCAGGGCCTATCCTACCAGGCCAGATGAGAGAACCTAGGGGTAGTGACATAGCTGGAACTACTAGTACCCTTCAGGAACAAATACAATGGATGACAAGCAACCCACCTGTCCCAGTGGGAGACATCTATAAAAGATGGATCATCCTAGGATTAAATAAAATAGTAAGAATGTATAGCCCTGTTAGCATTTTGGACATAAGACAAGGGCCAAAGGAACCTTTTAGAGACTATGTGGACAGGTTCTTTAAAACTCTAAGAGCTGAGCAAGCTTCACAGGAAGTAAAGAATTGGATGACAGAAAGCTTGCTGGTGCAAAATTCGAACCCAGACTGTAAGACCATCTTAAAAGCATTAGGACCAGGGGCTACACTAGAAGAAATGATGACAGCATGTCAGGGAGTGGGAGGACCTGGCCATAAGGCAAGGGTTTTGGCTGAGGCCATGAGCCAAGCAACAAATGCAGCTATAATGATGCAGAAAAGTAACTATAAGGGCCCAAGAAGATTTATTAAATGTTTTAATTGTGGCAAAGAAGGACACATAGCCAAAAATTGCAGGGCCCCTAGAAAAAAGGGCTGTTGGAAATGTGGAAAAGAAGGACATCAAATGAAAGACTGCACTGAAAGACAGGCTAATTTTTTAGGGAAAATTTGGCCTTCCAACAAGGGGAGGCCCGGAAATTTTCTTCAGAACAGGCCAGAGCCAACAGCCCCGCCAGCGGAGAGCTTCGGGTTCAAAGAGGAAATAACCCCCTCTCCGAAGCAGGAGCAGAAGGACGAGGGACAGGGACTGTATCCTCCCTTAGCCTCCCTCAAATCACTTTTTGGCAGCGACCCTTAGTCACCATAAGAGTGGGGGGACAGCTAAGGGAAGCTCTATTAGATACAGGAGCAGATGATACAGTATTAGAAGACATAGATTTGCCAGGAAAATGGAAACCAAAAATAATAGGGGGAATTGGAGGTTTTATCAAAGTAAAACAGTATGATCAAATAACCATAGATATTTGTGGACACAAGGCTATAGGTACAGTGTTAGTAGGACCTACACCTGTCAACATAATTGGAAGGAATATGTTGACTCAGATTGGTTGCACTTTAAATTTTCCAATTAGTCCTATTGAAACTGTACCAGTAAAATTGAAGCCAGGAATGGATGGCCCAAAGGTTAAACAATGGCCATTGACAGAGGAAAAAATAAAAGCACTAACAGAAATATGTACAGATATGGAAAAAGAAGGAAAGATTTCAAAAATTGGGCCTGAAAATCCATACAATACTCCAATATTTGCCATAAAGAAAAAAGACAGTACTAAATGGAGAAAATTAGTAGATTTTAGAGAACTTAATAAAAGAACTCAAGATTTTTGGGAAGTTCAATTAGGAATACCACATCCTGCAGGGTTAAAAAAGAAAAAGTCAGTAACAGTACTAGATGTGGGGGATGCATATTTTTCAGTTCCCTTAGATAAGGAGTTCAGGAAGTACACTGCATTCACCATACCTAGTCTCAACAATGAGACACCAGGAATCAGATACCAGTACAATGTGCTTCCACAAGGGTGGAAAGGATCACCAGCAATATTCCAAAGTAGTATGACAAAAATTTTAGAGCCCTTTAGAGCAAAAAATCCAGACATAGTTATCTACCAATACATGGATGATTTGTATGTAGGGTCTGACTTAGAACTAGGGCAGCATAGGATGAAAATAGAGGAGTTAAGGGAACATCTACTGAAATGGGGCTTTACTACACCAGACAAGAAACATCAGAAAGAACCCCCATTCCTTTGGATGGGGTATGAACTCCATCCTGATAAATGGACAGTACAGCCTATACAACTGCCAGAAAAGGACAGCTGGACTGTCAATGATATACAGAAGTTAGTAGGAAAATTAAATTGGGCAAGTCAGATTTATCCAGGGATTAAAATAAAGCAATTATGTAAACTCCTTAGGGGAGCCAAGGCACTAACAGACATAGTGCCACTGACTGAAGAAGCAGAGTTAGAATTGGCAGAGAACAGGGAGATTCTAAAAGAACCGGTACATGGGGTATATTATGACCCATCAAAAGACTTAATAGCAGAACTGCAGAAACAAGGGCAAGGCCAATGGACATATCAAATTTATCAAGAGCCATTTAAAAACCTAAAAACAGGAAAGTATGCAAAAACAAGGTCTGCCCACACTAATGATATAAAAGAATTAACAGATGCAGTGCAAAAGGTAGCTAGGGAATGCATAGTAATATGGGGAAAGAGTCCTAAGTTTAGGCTACCCATACAAAAGGAAACATGGGAGGCATGGTGGACAGATTATTGGCAAGCCACCTGGATTCCTGAATGGGAGTTTGTCAATACCCCCCCTCTAGTAAAACTATGGTATCAGTTAGAAACAGAGCCCATCATAGGAGCAGAAACCTTCTATGTAGATGGGGCATCTAATAGAGAGACCAAAAAAGGAAAAGCAGGATATGTTACTGACAGAGGAAGACAAAAGGCTGTCATCCTAACTGAAACCACAAATCAGAAGGCTGAGTTACAAGCAATTCATTTAGCTTTACAGGATTCAGGATCAGAAGTGAATATAGTAACAGACTCACAGTATGTATTAGGAATTATTCAAGCACAACCAGATAAGAGTGAATCAGAGATAGTCAATAAAATAATAGAGAAATTAATACAAAAGGAAAGGGTCTACCTGTCATGGGTACCAGCACACAAAGGGATTGGAGGAAATGAACAAGTAGATAGATTAGTCAGTGCTGGAATCAGGAAAATACTGTTTTTAGATGGGATAGATAAGGCACAAGAAGAACATGAAAAATATCACAACAACTGGAGAGCAATGGCTAGTGATTTTAATCTGCCACCAGTAGTAGCAAAAGAAATAGTAGCTAGCTGTGATAAATGTCAGCTAAAAGGAGAGGCCATGCATGGACAAGTAGACTGTAGTCCAGGAATATGGCAATTAGATTGTACACATTTAGAAGGAAAAATTATCCTAGTAGCAGTCCATGTAGCTAGTGGATATATAGAAGCAGAAGTCATTCCAGCAGAAACAGGACAGGAAACAGCCTACTTCATACTAAAGTTAGCAGGAAGATGGCCAGTAAAAATAATACATACAGACAATGGTAGCAATTTCACCAGTAGTGCAGTTAAGGCAGCCTGTTGGTGGGCAGGTATACAGCAGGAATTTGGAATTCCCTACAATCCCCAAAGTCAAGGAGTAGTAGAATCCATGAATAAAGAATTAAAGAAAATCATAGGACAAGTAAGAGATCAAGCTGAACATCTTAAGACAGCAGTACAAATGGCGGTATTCATTCACAATTTTAAAAGAAAAGGGGGGATTGGGGGGTACAGTGCAGGGGAAAGAATAATAGACATAATATCAACAGACATACAAACTAGAGAATTACAAAAACAAATTATAAAAATTCAAAATTTCCGGGTTTATTACAGGGACAGCAGAGACCCAGTTTGGAAAGGACCAGCAAAGCTACTCTGGAAAGGTGAAGGGGCAGTAGTCATACAAGACAATAGTGAAATAAAAGTAGTACCAAGAAGAAAAGCAAAGATCATTAGAGATTATGGAAAACAGATGGCAGGTGATGATTGTGTGGCAGGTAGACAGGATGAGGATTAGCACATGGAAAAGTTTAGTAAAATACCATATGCATGTTTCAAAGAAAGCCAAAAATTGGTTTTATAGACATCATTTTCAAAGCAGGCATCCAAAAATAAGTTCAGAAGTACACATCCCACTAGAAGAAGCTAAATTAGTAGTAACAACATATTGGGGTCTGCATACAGGAGAAAGAGATTGGCATCTGGGTCAGGGAGTCTCCATAGAATGGAGGCAGGGACGGTATAGGACACAAATAGATCCTGACCTGGCAGACCAACTGATCCATATATATTATTTTGATTGTTTTTCAGCCTCTGCCATAAGGAAAGCCATCTTAGGACATAGAATTAGCCCTAGGTGTAACTATCAAGCAGGACATAACAAGGTAGGATCCCTACAATATTTGGCACTAACAGCATTAATAGCTCCAAAGAAGACAAAGCCGCCTTTGCCTAGTGTCAAGAAACTAGTAGAAGATAGATGGAACAAGCCCCAGGAGACCAGGGGCCACAGAGGGAGCCATACAATGAATGGACACTAGAGCTTTTAGAGGAGCTTAAGAATGAAGCTATTAGACATTTTCCTAGGCCATGGCTTCATGGATTAGGACAATATATCTATAACACCTATGGGGATACTTGGGAAGGAGTTGAAGCTATAATAAGGATACTGCAACAACTACTGTTTATCCATTTCAGAATTGGGTGCCAACATAGCAGAATAGGCATTATTCGACAGAGAAGAGTAAGAAATGGAACTAGTAGATCCTAACTTAGATCCCTGGAATCAACCAGGAAGCCAGCCTACAACTCCTTGTACCAAATGTTATTGTAAAAAGTGTTGCTTTCATTGCTACTGCTGCTTTGCAACGAAGGGCTTAGGCATCTCCTATGGCAGGAAGAAGCGGAGACAACGACGAAGAACTCCTCAGAGCAGTCAGAGCCATAAAAATCCTATACCAGAGCAGTAAGTATTATAGTATATGTAATGTCCAATCTGTATGTATTATCAATAGTAGCATTTATAATAGCATTAATAATAGCAATAGTTGTGTGGACTATAGTATTTATAGAATATAAGAAATTGTTAAGGCAAAGAAAAATAAATAGGTTATATGAAAGAATAAGAGAAAGAGCAGAAGACAGTGGCAATGAGAGTGAGGGTGATGCAGAGGAACTGGCAGCACTTGGGGAAATGGGGTCTTTTATTTCTGGGGATATTAATAATCTGTAGTGCTGCAGACAACTTGTGGGTTACAGTCTATTATGGGGTACCTGTGTGGAAAGAAGCAACTACTACGTTATTTTGTGCATCAGATGCTAAAGGATATGAAAGAGAAGTGCATAATGTCTGGGCCACACATGCCTGCGTACCCACAGACCCCAACCCACAGGAAATATGGCTGAAAAATGTAACAGAAAATTTTGATATGTGGAAAAATAACATGGTAGAACAAATGCATGAAGATATAATCAGTTTATGGGATCAAAGCCTAAAGCCATGTGTAAAGTTAACTCCACTCTGTGTTACTTTACACTGTAGTGATGTCAATATCACTAGTAATGCCACTACCACTAATGACACCAGCACCCCGGAAGAGTCAGGGGCAATACAAAACTGTTCTTTCAATATGACCACAGAAGTAAAAGACAAGAAGCTGAGAGTAAATGCACTCTTTTATAAACTTGATATAATACCAATCAATAACAGCAGTAGTAGTGACTATAGGCTAATAAATTGTAATACCTCAACCATTAAACAGGCTTGTCCAAAGGTATCTTGGGATCCAATTCCCATACATTATTGTGCTCCAGCTGGTTATGCGATTCTAAAGTGTAGGGATCCAAGGTTCAATGGGACAGGGCCATGCAAGAATGTCAGCACAGTACAATGTACACATGGAATTAGGCCAGTGGTATCAACTCAATTGCTGTTAAATGGCAGCCTGGCAGAAGAAGATATAATAATCAGATCTCAAAATATCTCAGATAATGCAAAAACCATAATAGTACACCTTAATGAAAGTGTACAGATTAATTGTACAAGACCCAACAACAATACAAGAAAAAGTATACATTTAGGACCAGGACAAGCATTCTATGCAACAGGTGAGATAATAGGAGACATAAGAAAGGCACATTGTACCATTAATGGAACACTGTGGAATGCAACTTTAAATAGGGTAGCTGCAGAGGTCAAAAACCTTTTTAATAAAACAATAAAATTTAACCAATCCTCAGGAGGGGACCTAGAAATTACAATGCATAGTTTTAATTGTAGAGGAGAGTTCTTCTACTGCGATACATCAGGATTGTTTAATGAAAGTGAAAAGTACAATGGCACTATCATTCTCCCATGTAAAATAAAACAAATTATAAACATGTGGCAGGGAGTAGGACAAGCAATGTATTCCGCTCCCATTGCAGGACGCATTAACTGTAACTCAACTATTACAGGCCTACTATTAACAAGAGATGGTGGTCAGAGTAATGATACTAATAGGACTGAGACTTTCAGACCTGAGGGAGGAAACATGAAAGACAATTGGAGAAATGAACTATATAAATATAAAGTAGTAGAAATTGAACCACTAGGAGTAGCACCCACCAAGGCAAGAAGACGAGTGGTGCAGAGAGAAAGAAGAGCAGTGGGAATAGGAGCTCTGTTCCTTAGATTCTTGGGAGCAGCAGGAAGCAACATAGGCGCAGCGTCAATAACGCTGACGGTACAGGCCAGACAATTACTGTCTGGAATAGTGCAGCAGCAAAACAATTTGCTGAGGGCTATTGAAGCGCAACAGCATCTGTTGCAGCTCACAGTCTGGGGCATTAAACAGCTCCAGGCAAGAGTCCTTGCTGTAGAAAGATACCTAAAGGATCAACAGCTCCTAGGGATTTGGGGCTGCTCTGGAAAACTCATCTGCACCACTAACGTGCCTTGGAACACTAGTTGGAGTAATAAATCTCATGATGAGATTTGGAACAACATGACCTGGATGCAGTGGGAAAAAGAGATTAACAATTACTCAAACACAATATACAGGTTAATTGAAGAATCGCAGAACCAACAGGAAAAGAATGAACAAGAATTATTGGCATTGGACAAATGGGCAAGTCTGTGGAGTTGGTTTGACATATCAAATTGGCTGTGGTATATAAAAATATTCATAATGATAGTAGGAGGAATGATAGGCTTAAGAATAGTTTTTGCTGTGCTTTCTATAGTAAATAGAGTTAGGAAGGGATACTCACCTTTGTCATTACAGACCCTTATCCCAAGCCCGAGGGGACCCGACAGGCCCGAAGGAATCGAAGAAGGAGGTGGAGAGCAAGACAGAAACAGATCCGTTCGATTAGTGAACGGATTCTTGTCGCTTGTCTGGGACGACCTGAGGAACCTGTGCCTCTTCAGCTACCGCCACTTGAGAGACTTCATATTAATTGCAGCAAGGACTGTGGACAGGGGACTAACGAGGGGGTGGGAAACCCTCAAATATCTATGGAACCTCGCACAGTATTGGAGTCAGGAACTAAAGAATAGTGCTATTAGCTTGCTTAATACCACAGCAATAGTAGTAGCTGAGGGAACAGATAGAGTTATAGAAGTTTTGCAAAGAGCTGGTAGAGCTGTTCTCAACGTACCTAGAAGGATAAGACAGGGCTTAGAAAGGAGTTTGCTATAAAATGGGTGGTAAGTGGTCAAAAAGTAGTATAGTTGGATGGCCTGCTGTAAGGGAAAGAATGAGAAGGACCCCTCCAGCAGCAGAAGGGGTGGGAGCAGTGTCTCAAGACTTAGATAGGCGAGGGGCAGTTACAAGCAGCAATACTGCAGCTACTAATCCTGACTTGGCCTGGCTGGAAGCACAAGAGGATGAGGAAGTAGGCTTTCCAGTCAGACCTCAGGTACCTTTAAGACCTATGACTTTTAAGGCAGCTGTAGATCTCAGCCACTTTTTAAAAGAAAAGGGGGGACTGGAAGGGTTAATTTACTCCAAGAAAAGACAAGAAATCCTTGATCTGTGGGTTTACCACACACAAGGCTTCTTCCCTGATTGGCAGAACTACACCCCAGGGCCAGGGATTAGATTCCCATTGACTTTTGGATGGTGCTTCAAGCTAGTACCAGTTGATCCAGATGAGGTAGAAAAGGCCAATGAAGGAGAAAACAACTGCTTGCTACACCCAATGAGCCAACATGGAATGGATGATGAAGACAGAGAAGTACTGAGATGGGAGTTTGACAGTCGTCTGGCATTTAGACACATAGCCAGAGAGAAACATCCTGAGTTCTATCAAAACTGATGACACAGGACACAGAGATTGCTGACACAGAAG
>F1.FR.96.MP411_AJ249238_G.NG.01.01NGPL0674_DQ168575
ATGGGTGCGAGAGCGTCAGTATTAAGCGGGGGAAAATTAGATGCATGGGAAAGAATTCGATTAAGACCGGGGGGAAAGAAAAAATATAGAATGAAGCATCTAGTATGGGCAAGCAGGGAGTTAGAACGATTTGCAGTTGATCCTGGACTTCTAGAAACACCAGAAGGCTGTAAGCAAATAATAAGACAGCTACAACCATCCCTTCAGACAGGATCAGAAGAGCTTAGATCATTGTTCAATACAGTAGCAGTTCTCTATTGTGTACATCAAAAGATAGAGATAAAGGACACCAAGGAAGCTTTAGAGAAGTTAGAGGAGGAACAAAACAAAGGTCAGCAAAAGACACAGCAAGCGGCAGCTGACAAAGGAGTCAGTCAAAATTACCCTATAGTACAAAATCTTCAGGGACAGATGGTACATCAGCCTATATCACCTAGAACTTTAAATGCATGGGTAAAAGTGATAGAAGAGAAGGCTTTTAGCCCAGAAGTAATACCCATGTTCTCAGCATTATCAGAAGGGGCCACCCCACAAGATTTAAACACCATGCTAAATACAGTGGGTGGACATCAAGCAGCCATGCAAATGTTAAAAGACACCATCAATGAGGAAGCTGCAGAATGGGACAGATTACATCCAGCGCATGCAGGGCCTATCCTACCAGGCCAGATGAGAGAACCTAGGGGTAGTGACATAGCTGGAACTACTAGTACCCTTCAGGAACAAATACAATGGATGACAAGCAACCCACCTGTCCCAGTGGGAGACATCTATAAAAGATGGATCATCCTAGGATTAAATAAAATAGTAAGAATGTATAGCCCTGTTAGCATTTTGGACATAAGACAAGGGCCAAAGGAACCTTTTAGAGACTATGTGGACAGGTTCTTTAAAACTCTAAGAGCTGAGCAAGCTTCACAGGAAGTAAAGAATTGGATGACAGAAAGCTTGCTGGTGCAAAATTCGAACCCAGACTGTAAGACCATCTTAAAAGCATTAGGACCAGGGGCTACACTAGAAGAAATGATGACAGCATGTCAGGGAGTGGGAGGACCTGGCCATAAGGCAAGGGTTTTGGCTGAGGCCATGAGCCAAGCAACAAATGCAGCTATAATGATGCAGAAAAGTAACTATAAGGGCCCAAGAAGATTTATTAAATGTTTTAATTGTGGCAAAGAAGGACACATAGCCAAAAATTGCAGGGCCCCTAGAAAAAAGGGCTGTTGGAAATGTGGAAAAGAAGGACATCAAATGAAAGACTGCACTGAAAGACAGGCTAATTTTTTAGGGAAAATTTGGCCTTCCAACAAGGGGAGGCCCGGAAATTTTCTTCAGAACAGGCCAGAGCCAACAGCCCCGCCAGCGGAGAGCTTCGGGTTCAAAGAGGAAATAACCCCCTCTCCGAAGCAGGAGCAGAAGGACGAGGGACAGGGACTGTATCCTCCCTTAGCCTCCCTCAAATCACTTTTTGGCAGCGACCCTTAGTCACCATAAGAGTGGGGGGACAGCTAAGGGAAGCTCTATTAGATACAGGAGCAGATGATACAGTATTAGAAGACATAGATTTGCCAGGAAAATGGAAACCAAAAATAATAGGGGGAATTGGAGGTTTTATCAAAGTAAAACAGTATGATCAAATAACCATAGATATTTGTGGACACAAGGCTATAGGTACAGTGTTAGTAGGACCTACACCTGTCAACATAATTGGAAGGAATATGTTGACTCAGATTGGTTGCACTTTAAATTTTCCAATTAGTCCTATTGAAACTGTACCAGTAAAATTGAAGCCAGGAATGGATGGCCCAAAGGTTAAACAATGGCCATTGACAGAGGAAAAAATAAAAGCACTAACAGAAATATGTACAGATATGGAAAAAGAAGGAAAGATTTCAAAAATTGGGCCTGAAAATCCATACAATACTCCAATATTTGCCATAAAGAAAAAAGACAGTACTAAATGGAGAAAATTAGTAGATTTTAGAGAACTTAATAAAAGAACTCAAGATTTTTGGGAAGTTCAATTAGGAATACCACATCCTGCAGGGTTAAAAAAGAAAAAGTCAGTAACAGTACTAGATGTGGGGGATGCATATTTTTCAGTTCCCTTAGATAAGGAGTTCAGGAAGTACACTGCATTCACCATACCTAGTCTCAACAATGAGACACCAGGAATCAGATACCAGTACAATGTGCTTCCACAAGGGTGGAAAGGATCACCAGCAATATTCCAAAGTAGTATGACAAAAATTTTAGAGCCCTTTAGAGCAAAAAATCCAGACATAGTTATCTACCAATACATGGATGATTTGTATGTAGGGTCTGACTTAGAACTAGGGCAGCATAGGATGAAAATAGAGGAGTTAAGGGAACATCTACTGAAATGGGGCTTTACTACACCAGACAAGAAACATCAGAAAGAACCCCCATTCCTTTGGATGGGGTATGAACTCCATCCTGATAAATGGACAGTACAGCCTATACAACTGCCAGAAAAGGACAGCTGGACTGTCAATGATATACAGAAGTTAGTAGGAAAATTAAATTGGGCAAGTCAGATTTATCCAGGGATTAAAATAAAGCAATTATGTAAACTCCTTAGGGGAGCCAAGGCACTAACAGACATAGTGCCACTGACTGAAGAAGCAGAGTTAGAATTGGCAGAGAACAGGGAGATTCTAAAAGAACCGGTACATGGGGTATATTATGACCCATCAAAAGACTTAATAGCAGAACTGCAGAAACAAGGGCAAGGCCAATGGACATATCAAATTTATCAAGAGCCATTTAAAAACCTAAAAACAGGAAAGTATGCAAAAACAAGGTCTGCCCACACTAATGATATAAAAGAATTAACAGATGCAGTGCAAAAGGTAGCTAGGGAATGCATAGTAATATGGGGAAAGAGTCCTAAGTTTAGGCTACCCATACAAAAGGAAACATGGGAGGCATGGTGGACAGATTATTGGCAAGCCACCTGGATTCCTGAATGGGAGTTTGTCAATACCCCCCCTCTAGTAAAACTATGGTATCAGTTAGAAACAGAGCCCATCATAGGAGCAGAAACCTTCTATGTAGATGGGGCATCTAATAGAGAGACCAAAAAAGGAAAAGCAGGATATGTTACTGACAGAGGAAGACAAAAGGCTGTCATCCTAACTGAAACCACAAATCAGAAGGCTGAGTTACAAGCAATTCATTTAGCTTTACAGGATTCAGGATCAGAAGTGAATATAGTAACAGACTCACAGTATGTATTAGGAATTATTCAAGCACAACCAGATAAGAGTGAATCAGAGATAGTCAATAAAATAATAGAGAAATTAATACAAAAGGAAAGGGTCTACCTGTCATGGGTACCAGCACACAAAGGGATTGGAGGAAATGAACAAGTAGATAGATTAGTCAGTGCTGGAATCAGGAAAATACTGTTTTTAGATGGGATAGATAAGGCACAAGAAGAACATGAAAAATATCACAACAACTGGAGAGCAATGGCTAGTGATTTTAATCTGCCACCAGTAGTAGCAAAAGAAATAGTAGCTAGCTGTGATAAATGTCAGCTAAAAGGAGAGGCCATGCATGGACAAGTAGACTGTAGTCCAGGAATATGGCAATTAGATTGTACACATTTAGAAGGAAAAATTATCCTAGTAGCAGTCCATGTAGCTAGTGGATATATAGAAGCAGAAGTCATTCCAGCAGAAACAGGACAGGAAACAGCCTACTTCATACTAAAGTTAGCAGGAAGATGGCCAGTAAAAATAATACATACAGACAATGGTAGCAATTTCACCAGTAGTGCAGTTAAGGCAGCCTGTTGGTGGGCAGGTATACAGCAGGAATTTGGAATTCCCTACAATCCCCAAAGTCAAGGAGTAGTAGAATCCATGAATAAAGAATTAAAGAAAATCATAGGACAAGTAAGAGATCAAGCTGAACATCTTAAGACAGCAGTACAAATGGCGGTATTCATTCACAATTTTAAAAGAAAAGGGGGGATTGGGGGGTACAGTGCAGGGGAAAGAATAATAGACATAATATCAACAGACATACAAACTAGAGAATTACAAAAACAAATTATAAAAATTCAAAATTTCCGGGTTTATTACAGGGACAGCAGAGACCCAGTTTGGAAAGGACCAGCAAAGCTACTCTGGAAAGGTGAAGGGGCAGTAGTCATACAAGACAATAGTGAAATAAAAGTAGTACCAAGAAGAAAAGCAAAGATCATTAGAGATTATGGAAAACAGATGGCAGGTGATGATTGTGTGGCAGGTAGACAGGATGAGGATTAGCACATGGAAAAGTTTAGTAAAATACCATATGCATGTTTCAAAGAAAGCCAAAAATTGGTTTTATAGACATCATTTTCAAAGCAGGCATCCAAAAATAAGTTCAGAAGTACACATCCCACTAGAAGAAGCTAAATTAGTAGTAACAACATATTGGGGTCTGCATACAGGAGAAAGAGATTGGCATCTGGGTCAGGGAGTCTCCATAGAATGGAGGCAGGGACGGTATAGGACACAAATAGATCCTGACCTGGCAGACCAACTGATCCATATATATTATTTTGATTGTTTTTCAGCCTCTGCCATAAGGAAAGCCATCTTAGGACATAGAATTAGCCCTAGGTGTAACTATCAAGCAGGACATAACAAGGTAGGATCCCTACAATATTTGGCACTAACAGCATTAATAGCTCCAAAGAAGACAAAGCCGCCTTTGCCTAGTGTCAAGAAACTAGTAGAAGATAGATGGAACAAGCCCCAGGAGACCAGGGGCCACAGAGGGAGCCATACAATGAATGGACACTAGAGCTTTTAGAGGAGCTTAAGAATGAAGCTATTAGACATTTTCCTAGGCCATGGCTTCATGGATTAGGACAATATATCTATAACACCTATGGGGATACTTGGGAAGGAGTTGAAGCTATAATAAGGATACTGCAACAACTACTGTTTATCCATTTCAGAATTGGGTGCCAACATAGCAGAATAGGCATTATTCGACAGAGAAGAGTAAGAAATGGAACTAGTAGATCCTAACTTAGATCCCTGGAATCAACCAGGAAGCCAGCCTACAACTCCTTGTACCAAATGTTATTGTAAAAAGTGTTGCTTTCATTGCTACTGCTGCTTTGCAACGAAGGGCTTAGGCATCTCCTATGGCAGGAAGAAGCGGAGACAACGACGAAGAACTCCTCAGAGCAGTCAGAGCCATAAAAATCCTATACCAGAGCAGTAAGTATTATAGTATATGTAATGTCCAATCTGTATGTATTATCAATAGTAGCATTTATAATAGCATTAATAATAGCAATAGTTGTGTGGACTATAGTATTTATAGAATATAAGAAATTGTTAAGGCAAAGAAAAATAAATAGGTTATATGAAAGAATAAGAGAAAGAGCAGAAGACAGTGGCAATGAGAGTGAGGGTGATGCAGAGGAACTGGCAGCACTTGGGGAAATGGGGTCTTTTATTTCTGGGGATATTAATAATCTGTAGTGCTGCAGACAACTTGTGGGTTACAGTCTATTATGGGGTACCTGTGTGGAAAGAAGCAACTACTACGTTATTTTGTGCATCAGATGCTAAAGGATATGAAAGAGAAGTGCATAATGTCTGGGCCACACATGCCTGCGTACCCACAGACCCCAACCCACAGGAAATATGGCTGAAAAATGTAACAGAAAATTTTGATATGTGGAAAAATAACATGGTAGAACAAATGCATGAAGATATAATCAGTTTATGGGATCAAAGCCTAAAGCCATGTGTAAAGTTAACTCCACTCTGTGTTACTTTACACTGTAGTGATGTCAATATCACTAGTAATGCCACTACCACTAATGACACCAGCACCCCGGAAGAGTCAGGGGCAATACAAAACTGTTCTTTCAATATGACCACAGAAGTAAAAGACAAGAAGCTGAGAGTAAATGCACTCTTTTATAAACTTGATATAATACCAATCAATAACAGCAGTAGTAGTGACTATAGGCTAATAAATTGTAATACCTCAACCATTAAACAGGCTTGTCCAAAGGTATCTTGGGATCCAATTCCCATACATTATTGTGCTCCAGCTGGTTATGCGATTCTAAAGTGTAGGGATCCAAGGTTCAATGGGACAGGGCCATGCAAGAATGTCAGCACAGTACAATGTACACATGGAATTAGGCCAGTGGTATCAACTCAATTGCTGTTAAATGGCAGCCTGGCAGAAGAAGATATAATAATCAGATCTCAAAATATCTCAGATAATGCAAAAATCATAATAGTGCAGCTTAAGGAACCTATAGAAATTAACTGTACCAGACCCAACAACAATACAAGAAAAAGTGTAGGAATTGGACCTGGACAAACGTTCTATGCAACAGGTGATATAATAGGAGATATAAAAAAGGCATATTGTGAAATTAATGGAACACAATGGAGTAAAACTAAAACACAGGTACAAGAAAAGTTACGGGCTCTTTTTAATAAAACAATAAAATTTAACCAATCCTCAGGAGGGGACCTAGAAATTACAATGCATAGTTTTAATTGTAGAGGAGAGTTCTTCTACTGCGATACATCAGGATTGTTTAATGAAAGTGAAAAGTACAATGGCACTATCATTCTCCCATGTAAAATAAAACAAATTATAAACATGTGGCAGGGAGTAGGACAAGCAATGTATTCCGCTCCCATTGCAGGACGCATTAACTGTAACTCAACTATTACAGGCCTACTATTAACAAGAGATGGTGGTCAGAGTAATGATACTAATAGGACTGAGACTTTCAGACCTGAGGGAGGAAACATGAAAGACAATTGGAGAAATGAACTATATAAATATAAAGTAGTAGAAATTGAACCACTAGGAGTAGCACCCACCAAGGCAAGAAGACGAGTGGTGCAGAGAGAAAGAAGAGCAGTGGGAATAGGAGCTCTGTTCCTTAGATTCTTGGGAGCAGCAGGAAGCAACATAGGCGCAGCGTCAATAACGCTGACGGTACAGGCCAGACAATTACTGTCTGGAATAGTGCAGCAGCAAAACAATTTGCTGAGGGCTATTGAAGCGCAACAGCATCTGTTGCAGCTCACAGTCTGGGGCATTAAACAGCTCCAGGCAAGAGTCCTTGCTGTAGAAAGATACCTAAAGGATCAACAGCTCCTAGGGATTTGGGGCTGCTCTGGAAAACTCATCTGCACCACTAACGTGCCTTGGAACACTAGTTGGAGTAATAAATCTCATGATGAGATTTGGAACAACATGACCTGGATGCAGTGGGAAAAAGAGATTAACAATTACTCAAACACAATATACAGGTTAATTGAAGAATCGCAGAACCAACAGGAAAAGAATGAACAAGAATTATTGGCATTGGACAAATGGGCAAGTCTGTGGAGTTGGTTTGACATATCAAATTGGCTGTGGTATATAAAAATATTCATAATGATAGTAGGAGGAATGATAGGCTTAAGAATAGTTTTTGCTGTGCTTTCTATAGTAAATAGAGTTAGGAAGGGATACTCACCTTTGTCATTACAGACCCTTATCCCAAGCCCGAGGGGACCCGACAGGCCCGAAGGAATCGAAGAAGGAGGTGGAGAGCAAGACAGAAACAGATCCGTTCGATTAGTGAACGGATTCTTGTCGCTTGTCTGGGACGACCTGAGGAACCTGTGCCTCTTCAGCTACCGCCACTTGAGAGACTTCATATTAATTGCAGCAAGGACTGTGGACAGGGGACTAACGAGGGGGTGGGAAACCCTCAAATATCTATGGAACCTCGCACAGTATTGGAGTCAGGAACTAAAGAATAGTGCTATTAGCTTGCTTAATACCACAGCAATAGTAGTAGCTGAGGGAACAGATAGAGTTATAGAAGTTTTGCAAAGAGCTGGTAGAGCTGTTCTCAACGTACCTAGAAGGATAAGACAGGGCTTAGAAAGGAGTTTGCTATAAAATGGGTGGTAAGTGGTCAAAAAGTAGTATAGTTGGATGGCCTGCTGTAAGGGAAAGAATGAGAAGGACCCCTCCAGCAGCAGAAGGGGTGGGAGCAGTGTCTCAAGACTTAGATAGGCGAGGGGCAGTTACAAGCAGCAATACTGCAGCTACTAATCCTGACTTGGCCTGGCTGGAAGCACAAGAGGATGAGGAAGTAGGCTTTCCAGTCAGACCTCAGGTACCTTTAAGACCTATGACTTTTAAGGCAGCTGTAGATCTCAGCCACTTTTTAAAAGAAAAGGGGGGACTGGAAGGGTTAATTTACTCCAAGAAAAGACAAGAAATCCTTGATCTGTGGGTTTACCACACACAAGGCTTCTTCCCTGATTGGCAGAACTACACCCCAGGGCCAGGGATTAGATTCCCATTGACTTTTGGATGGTGCTTCAAGCTAGTACCAGTTGATCCAGATGAGGTAGAAAAGGCCAATGAAGGAGAAAACAACTGCTTGCTACACCCAATGAGCCAACATGGAATGGATGATGAAGACAGAGAAGTACTGAGATGGGAGTTTGACAGTCGTCTGGCATTTAGACACATAGCCAGAGAGAAACATCCTGAGTTCTATCAAAACTGATGACACAGGACACAGAGATTGCTGACACAGAAG
>F1.FI.93.FIN9363_AF075703_H.BE.93.VI991_AF190127
AAAGCGAAAGTAGAACCAGAGAAGATCTCTCGACGCAGGACTCGGCTTGCTGAAGTGCACACGGCAAGAGGCGAGAGCGGCGACTGGTGAGTACGCCAATTTTTGACTAGCGGAGGCTAGAAGGAGAGAGATGGGTGCGAGAGCGTCAGTATTAAGCGGGGGAAAACTAGATGCATGGGAAAAAATTCGGTTAAGGCCGGGGGGAAAGAAACAATATAGAATAAAACATCTAGTATGGGCAAGCAGGGAGCTAGAACGATTTGCAATAGATCCTGGCCTTCTAGAAACATCAGAAGGCTGTCAAAAAATAATAGCACAGATACAGCCATCCATTCAGACAGGATCAGAAGAGCTTAGATCATTATATAACACAATAGCAGTCCTCTATTTTGTACATCAAAAGATAGAGGTAAAGGACACCAAGGAAGCTTTAGATAAGCTAGAGGAAGAACAAAACAAAAGTCAGCAAAAGACACAGCAAGCGGCAGCTGCAGCTGACAAAGGGGTCAGTCAAAATTACCCTATAGTACAGAATCTTCAGGGACAAATGGTACATCAGGCTATATCACCTAGAACTTTAAATGCATGGGTAAAGGTGATAGAAGAGAAGGCTTTTAGCCCAGAAGTTATACCCATGTTTTCAGCATTATCAGAAGGGGCCACTCCACAAGATTTAAACACCATGCTAAATACAGTGGGGGGACATCAAGCAGCCATGCAAATGTTAAAAGACACCATTAATGAGGAAGCTGCAGAATGGGACAGATTACATCCAGTGCATGCAGGACCTATTCCACCAGGCCAGATGAGAGAACCAAGGGGAAGTGATATAGCAGGAACTACTAGTACCCTTCAGGAACAAGTAGCATGGATGACAGGCAATCCCCCAATCCCAGTGGGAGACATCTATAAAAGATGGATCATCCTAGGATTAAATAAAATAGTAAGGATGTATAGCCCTGTCAGCATTTTGGACATAAGACAAGGGCCAAAAGAACCCTTTAGAGACTATGTAGACAGGTTCTTTAAAGCTCTAAGAGCTGAGCAAGCTACACAGGAAGTAAAGGGTTGGATGACAGACACCTTGTTGGTCCAAAATGCGAATCCAGATTGTAAGATCATTTTAAAAGGATTGGGAATAGGGGCTACACTAGAAGAAATGATGACAGCATGTCGGGGAGTGGGAGGACCTGGCCATAAGGCAAGAATTTTGGCTGAGGCAATGAGCCAAGCAAATACAACCATAATGATGCAGAAAAGTAATTTTAGGGGCCAAAGAAGAATTGTTAAATGTTTTAATTGTGGCAAAGAAGGACACATAGCCAGAAATTGCAGGGCCCCCAGGAAAAAGGGCTGTTGGAAATGTGGACAAGAAGGGCACCAAATGAAAGACTGCACTGAAAGACAGGCTAATTTTTTAGGGAAAATTTGGCCTTCCAACAAGGGGAGGCCCGGAAATTTCCTTCAGAGTAGACCAGAGCCAACAGCCCCGCCAGCAGAGAGCCTCGGGATCAGAGAAGAGGTAACTCCCTCTCCGAGGCAGGAGCAGAAAGAAGAGGGACAGTACCCTCCCTTAGCTTCCCTCAAATCACTCTTTGGCAACGACCCCTAGTCACAATAAAAATAGGGGGACAGCTAAAGGAAGCTCTATTAGATACAGGAGCAGATGATACAGTATTAGAAGACATAAATTTGCCAGGAAAATGGAAACCAAAAATGATAGGGGGAATTGGAGGTTTTATTAAAGTAAAACAGTATGATCACATACTCATAGAAATTTGTGGACATAAAGCCATAGGTACAGTGTTAGTAGGACCTACGCCTGTCAACATAGTTGGAAGAAATATGTTGACTCAAATTGGTTGTACTTTAAATTTTCCAATTAGTCCTATTGAAACTGTACCAGTAAAACTGAAACCAGGAATGGATGGCCCAAAGGTTAAACAATGGCCATTGACAGAAGAAAAAATAAAAGCATTAACAGAGATATGTACAGATATGGAAAAAGAAGGAAAAATTTCAAGAATTGGGCCTGAAAATCCATACAATACTCCAGTATTTGCCATAAAGAAAAAAGACAGTACTAAATGGAGGAAGTTAGTAGATTTCAGAGAACTCAATAAAAGAACTCAAGATTTTTGGGAGGTTCAATTAGGAATACCACATCCTGCAGGGTTAAAAAAGAAAAAGTCAGTAACAGTACTGGATGTGGGGGATGCATATTTTTCAGTTCCCTTAGATAAAGATTTCAGGAAGTACACTGCATTCACCATACCTAGTGTCAACAATGAGACACCAGGAATTAGGTACCAGTACAATGTGCTTCCACAAGGATGGAAAGGATCACCAGCAATATTCCAATGTAGCATGACAAAAATCTTAGAGCCCTTTAGAACAAGAAATCCAGACATAGTTATCTACCAATACATGGATGATTTGTATGTAGGGTCTGACTTAGAAATAGGGCAGCATAGAACAAAAATAGAGGAGTTAAGAGAACATCTACTGAAATGGGGATTTACTACACCAGACAAAAAACATCAGAAAGAACCTCCATTCCTCTGGATGGGGTATGAACTCCATCCTGATAAATGGACAGTGCAGCCTATACAATTGCCAGACAAGGACAGCTGGACTGTCGATGATATACAGAAATTAGTAGGAAAACTAAACTGGGCAAGTCANATTTATCCAGGGATTAAAGTAAGGCAATTATGTAAACTCCTTAGAGGAGCCAAGGCACTAACAGACATGGTGCCACTGACTGCAGAAGCAAATTTAGAATTGGCAGAAAATAGGGAGATTCTAAAAGAACCAGTACATGGGGTATATTATGACCCATCAAAAGACTTAATACCAAAATTACAGAAACAAGGGCAAGGACAATGGACATATCAAATTTACCGAGAGCCATTTAAAAATCTAAAAACAGGAAAGTATGCAAAAATGAGGTCTGCCCACACTAATGATGTAAAACAATTAACAGAAGCAGTGCAAAAGATAGCTCTAGAAAGCATAGTAATATGGGGAAAGACTCCTAAGTTTAAACTACCTATTCTAAAAGAGACATGGGATACATGGTGGACAGAGTATTGGCAAGCCACCTGGATTCCTGAGTGGGAGTTTGTCAATACCCCCCCTCTAGTAAAACTATGGTATCAATTAGAAACAGAGCCCATAGCAGGAGCAGAAACATTCTATGTGGATGGGGCATCTAATAGAGAGACCAAAAAAGGAAAAGCAGGATATGTTACTGATAGAGGAAGACAAAAGGTTGTCTCCCTAACTGAGACCACAAATCAGAAGGCTGAGTTACAAGCAATTCATTTAGCTTTACAGGATTCAGGATCAGAAGTGAACATAGTAACAGATTCACAATATGCATTAGGAATCATTCAAGCACAACCAGATAAGAGTGAATCAGAGTTAGTCAATCAAATAATAGAGCAGTTAATACAAAAGGAAAAGATCTACCTGTCATGGGTACCAGCACACAAAGGGATTGGAGGAAATGAACAAGTAGATAAATTAGTCAGTGCTGGAATCAGAAAAATACTGTTTTTAGATGGGATAGATAAGGCACAAGAGGAACATGAAAAATATCACAACAATTGGAGAGCAATGGCTAGTGATTTTAATCTGCCACCTGTAGTAGCAAAAGAAATAGTAGCTAGCTGTGATAAGTGTCAGCTAAAAGGGGAAGCCATGCATGGACAAGTAGACTGTAGTCCAGGGATATGGCAATTAGATTGTACACATTTAGAAGGAAAAATTATCCTGGTAGCAGTCCATGTAGCTAGTGGATACATAGAAGCAGAAGTTATCCCAGCAGAAACAGGACAGGACACAGCCTACTTCATACTAAAGTTAGCAGGAAGATGGCCAGTAAAAATGATACATACAGACAATGGCAGCAATTTCACCAGTGCCGCGGTTAAGGCAGCCTGTTGGTGGGCAGGTATCCAGCAGGAATTTGGAATTCCCTATAACCCCCAAAGTCAAGGAGTAGTAGAATCAATGAATAAAGAGCTAAAGAAGATCATAGGACAGGTAAGAGATCAAGCTGAACATCTTAAGACAGCAGTACAAATGGCAGTATTCATCCACAATTTTAAAAGAAAAGGGGGGATTGGGGGGTACAGTGCAGGGGAAAGAATAATAGACATAATAGCAACAGACATACAAACTAAAGAATTACAAAAACAAGTTACAAAAATTCAAAATTTCCGGGTTTATTACAGGGACAGCAGAGACCCAGTTTGGAAAGGACCAGCAAAGCTACTCTGGAAAGGTGAAGGGGCAGTAGTCATACAAGACAATAGTGAAATAAAAGTAGTGCCAAGAAGAAAAGCAAAGATCATTAGGGATTATGGAAAACAGATGGCAGGTGACGATTGTGTGGCAGGTAGACAGGATGAGGATTAACACATGGAAAAGTTTAGTAAAATACCATATGCATGTTTCAAAGAAAGCCAAAAGATGGTTTTATAGACATCACTTTGAAAGCAGACATCCAAAAATAAGTTCAGAAGTACACATCCCCCTAGAGGAAGCTGAATTAGTAATAACAACATATTGGGGGCTGAATACAGGAGAAAGAGATTGGCATCTGGGTCAAGGAGTCTCCATAGAATGGAGGCAGGGGAGGTATAGGACACAAATAGACCCTGGCCTGGCAGACCAACTGATCCATATATATTACTTTGATTGTTTTTCAGAATCTGCCATAAGGAAAGCCATATTAGGACATAGAATTAGCCCTAGGTGTGACTATCAAGCAGGACATAACAAGGTAGGATCCCTACAATATTTGGCACTAACAGCATTAGTATCTCCAAAGAAGGCAAAGCCGCCTTTGCCTAGTGTCAAGAAACTAGTAGAAGACAGATGGAACAAGCCCCAGGAGATCAGGGGCCACAGAGGGAGCCATACAATGAATGGGCACTAGAACTTTTAGAGGAGCTTAAGAACGAAGCTGTTAGACATTTTCCTAGGCCATTCCTCCATGGCATAGGACAATATATCTATAACACCTATGGGGATACTTGGGAGGGAGTTGAAGCCATAATAAAAATATTGCAGCAACTACTGTTTATCCATTTCAGAATTGGGTGCCATCATAGCAGAATAGGCATTATTCGACAGAGAAGAGTAAGAAATGGAGCTAGTAGATCCTAATTTAGATCCCTGGAACCATCCAGGAAGCCAGCCTCCAACTCCTTGTAACAAATGCTATTGTAAACGGTGTTGCTTTCATTGCTACTGGTGCTTTGCAACGAAGGGCTTAGGCATCTCCTATGGCAGGAAGAAGCGGAGACAGCGACACAGAACTCCTCAAAGCAGTCAAATACATCAAGATCCTGTACCAAAGCAGTAAGTATTGTTAAGTAGTGTATGTAATGTCAGATTTGTTAGCAATAACGATAGTAGCATTTATAGTAGCCCTAATAATAGTAATAGTTGTGTGGACCATAGTATTTATAGAATATAAGAAGCTAGTAAGGCAAAGAAAAATAAATAGGTTGTATATAAGAATAAGAGAAAGAGCAGAAGACAGTGGCAATGAGAGTGAGGGGGATGCAGAGGAATTGGCAGCACTTGGGAAAATGGGGCCTTTTATTCCTGGGGATGTTAATAATCTGTAAAGCTGCGGATGACTTGTGGGTCACAATCTATTATGGGGTACCTGTGTGGAAAGAAGCAAACACCACTTTATTCTGTGCATCAGATGCTAAATCATATGAAAAAGAAGTACATAATGTCTGGGCTACACATGCCTGTGTACCCACAGACCCCAATCCACAAGAAGTAGCTCTAAATGTGACAGAAAATTTTAATATGTGGGAAAATGACATGGTAGAACAAATGCATAAAGATATAATCAGTTTATGGGATCAAAGTCTAAAGCCATGTGTAAAGCTAACCCCACTCTGTGTTACTTTAAATTGTACTAATGCCACTACCACCAATGACACTCTCTCTGACCAAAGCAGTACCCTGAAGGAAGAACCAGGGGCAATACAAAACTGTTCTTTCAATATGACCACAGAAGTAGAAGATAAGAAGCAGAAAGTACATGCGCTTTTTTATAGACTTGATATAGAACCAATCAGCAATAATAATAGCAGGGAAGAATATAGGCTAATAACTTGTAATACCTCAACCATTACACAGGCTTGTCCAAAGGTATCTTGGGATCCAATTCCCATACATTATTGTGCTCCAGCTGGTTATGCGATTCTAAAGTGTAAGGATAAAAGGTTCAATGGGACGGGGCCATGTAGGAATGTCAGCACAGTACAATGTACACATGGAATTAGGCCAGTGGTATCAACTCAATTGTTGTTAAATGGCAGCCTATCAGAAGGAGGTATAATAATCAGATCTCAAAATCTCTCAGATAATGCAAAAACTATAATAGTACACCTTAATGAATCTGTACAGATCAATTGTACAAGACCCAACAACAATACAAGAAAAAGTATACGTATAGGACCAGGACAATCATTTTATGCAACAGGAGAAATAATAGGAGACATAAGAAAGGCACATTGTAACATTAGTGGAGAACAATGGAATAAAACTTTAGACCGAGTAAAGGCAGAGTTAAAGCTTCATTTTAATAAAACAATACAATTTAACTCATCCTCAGGAGGGGACCTAGAAATTACAATGCATAGTTTTAATTGTAGAGGAGAATTTTTCTACTGCAATACATCACTACTGTTTAATAATACAGTACCTAATAATGGCACTATCACTCTCCCATGTCGAATAAAACAATTTGTAAACATGTGGCAGGAAGTAGGACGAGCAATGTATGCCGCTCCCATTGCAGGAAACATTACCTGTAACTCAAATATTACAGGTCTGCTATTGACAAGAGATGGTGGTCAGAGTAATAATAGTGATTCTGAGACCTTCAGACCTGGGGGAGGAGATATGAAAGACAATTGGAGAAGTGAACTATATAAATATAAAGTAGTAGAAATTGAACCACTAGGAGTAGCACCCACCAGGCCCAAAAGACCAGTGGTGAGGAGAGAAAGAAGAGCAGTGGCAATAGGAGCTGTATTCCTTGGGTTCTTGAGCGCAGCAGGAAGCACTATGGGCGCGGCGTCACTAACGCTGACGGTACAGGCCAGACAATTATTGTCTGGAATAGTGCAACAGCAGAACAATCTGCTGCAGGCTATTGAAGCGCAACAGCATATGTTGCAGCTCACAGTCTGGGGCATTAAACAGCTCCAGGCAAGAGTCCTGGCTGTGGAAAGATACCTAAAGGATCAACAGCTCCTAGGGCTTTGGGGATGCTCTGGAAAACTCATCTGCACCACTAATGTGCCCTGGAACTCTAGTTGGAGTAATAAATCTCAGGATGAGATTTGGAATAACATGACCTGGATGCAGTGGGAAAAAGAGATTAGCAATTACTCAAAAACAATATACATGTTAATTGAAAAATCGCAGAGCCAGCAGGAACGGAATGAACAAGAATTGTTGGAATTGGACAAGTGGGATAGTCTGTGGAGTTGGTTTGATATAACAAACTGGTTATGGTATATAAAAATATTCATAATGATAGTAGGAGGCTTGATAGGCTTAAGAATAGTTTTTGCTGTGCTTTCTATAGTAAATAGAGTTAGGAAGGGATACTCACCTTTGTCATTACAGACCCTTATCCCAGCCCCGACGGAACCCGACAGGCCCGAAGGAATCGAAGAAGGAGGTGGAGAGCAAGGCAAAGACAGATCCGTGCGATTAGTGAACGGATTCTTAGCTCTTGTCTGGGACGACTTGAGGAACCTGTGCCTCTTCAGCTACCGCCACTTGAGAGACTTCATATTAATTGCAGCGAGGATTGTGGACAGGGGACTGAGGAGGGGGTGGGAAGCCCTCAAATATCTGGGGAACATCATACAGTATTGGAGTCAGGAACTAAAGAATAGTGCTATTAGCTTGTTTAATACCACAGCAATAGTAGTAGCTGAGGGGACAGATAGAGTTATAGAAGCTTTGCAAAGAGCTGTTAGAGCTGTTCTCAACATACCTAGAAGAATAAGACAGAGAGTAGAAAGGGCTTTGATATAAAATGGGTGGCAAGTGGTCAAAAAGTAGTATAGTTGGATGGCCTGCTATAAGGGAAAGAATGAGACGACCCCCTCCAGCAGCAGCAGAAGGGGTGGGAGCAGTGTCTCAAGACTTAGAAAGACGGGGGGCAATTACAAGCAGCAATACTGGAGCTACTAATCCTGACTTGGCCTGGCTGGAAGCACAAGAGGACGAGGAAGTAGGCTTTCCAGTCAGACCCCAGGTACCTTTAAGACCAATGACTTATAAGGGAGCTTTTGATCTCAGTCAGTTTCNANAAGAAAAGGGGGGACTGGAAGGGTTAWTTTACTCCAAGAAAAGACAAGAGATCCTTGATCTGTGGCTTTACCACACACAAGGCTACTTCCCCTGATTGGCAGAACTACACACCAGGGCCGGGGGGTCAGATATCCCCTGACCTTTGGGTGGTGCTTCAAGCTAGTACCAGTTGAGCCAGAGGAGGTAGAAAAGGCCAATGAAGGAGAGAACAACTGCTTGCTACACCCCATGAGCCAACATGGAATGGAGGATGAAGACAGAGAAGTACTGAAATGGAAGTTTGACAGCCGCCTGGCACTGAAACACATAGCCAGAGAGAGACATCCGGAGTTCTACCGAGACTGAGATTGCTGACACAGAGATTGCTGACACAGAAGAATCTAAGGGACTTTCCACTGGGGACTTTCCAGAGGGCGGTCCAGAGGGCGGGACTGGGGAGTGGCTCACCCTCAGATGCTGCATATAAGCAGCCGCTTTTCGCTTGTACAGGGTCTCTCTGGTTAGACCAGATTTGAGCCTGGGAGCTCTCTGGCTAGCTGAGAACCCGCTGCTTAA
>F1.BR.89.BZ163_AY173958_J.SE.93.SE7887_AF082394
GGACGCGAAAGCGAAAGTAGAACCAGAGAAGATCTCTCGACGCAGGACTCGGCTTGCTGAAGTGCACACGGCAAGAGGCGAGGGGGGCGACTGGTGAGTACGCCAAATTTTGACTAGCGGAGGCTAGAAGGAGAGAGATGGGTGCGAGAGCGTCAGTATTAAGCGGGGGAAAGCTAGATGCATGGGAAAAAATTCGGTTGAGGCCGGGGGGAAAGAAAAAATATTGCTTGAAGCATCTAGTATGGGCAAGCAGGGAGCTAGAACGATTTGCAATTAATCCTGGCCTTCTAGAAACATCAGAAGGCTGTCAAAAAATAATAGGACAGTTACAACCATCCCTTCAGACAGGATCAGAAGAGCTTAGATCATTATATAATACAGTAGCAGTCCTCTATTTTGTACATCAAAGGATAGAGGTAAAAGACACCAAGGAAGCTTTAGACAAGCTAGAGGAAGAGCAAAACAAAAGTCAGCAAAAGACAAAGCAAGCGGCAGCTGACAAAGGGGTCAGTCAAAATTACCCTATAGTACAGAATCTTCAGGGACAAATGGTACATCAATCTATATCACCTAGAACTTTAAATGCATGGGTAAAGGTGATAGAAGAGAAGGCTTTTAGCCCAGAAGTAATACCCATGTTTTCAGCATTATCAGAAGGGGCCACTCCACAAGATTTAAACACCATGTTAAATACAGTGGGGGGACATCAAGCAGCGATGCAAATGTTAAAAGACACCATCAATGAAGAAGCTGCAGAATGGGACAGATTACATCCAGTGCAGGCAGGACCTATCCCACCAGGCCAGATAAGGGAACCTAGGGGAAGTGATATAGCTGGAACTACTAGTACCCTTCAGGAACAAATACAATGGATGACAAGCAACCCACCTGTCCCAGTGGGAGAAATCTATAAAAGATGGATCATTCTAGGATTAAATAAAATAGTAAGAATGTATAGCCCTGTCAGCATTTTGGACATAAGACAAGGGCCAAAGGAGCCCTTTAGAGACTATGTAGACAGGTTCTTTAAAACCCTAAGAGCTGAGCAAGCTACACAGGAAGTAAAGGGTTGGATGACAGACACCTTGTTGGTCCAAAATGCGAACCCAGATTGTAAGACCATTTTAAAAGCATTGGGACCAGGGGCTACACTAGAAGAAATGATGACAGCATGTCAGGGAGTGGGAGGACCTGGCCATAAGGCGAGGGTTTTGGCTGAGGCAATGAGCCAAGCAACAAATGCAACTATAATGATGCAGAAAAGTAATTTTAAGGGCCAAGGAAGAATTGTAAAATGTTTTAATTGTGGCAAAGCAGGACACATAGCCAAAAATTGCAGGGCCCCTAGAAAAAAGGGCTGTTGGAAATGTGGAAGAGAAGGACACCAAATGAAAGACTGCACTGAAGGACAGGCTAATTTTTTAGGGAAAATTTGGCCTTCCCACAAGGGGAGGCCCGGAAATTTCCTTCAGAACAGGCCAGAGCCAACAGCCCCGCCAGCAGAGAGCTTCGGGTTCAGAGAGGAGACAACCCCCTCTCCGAAGCAGGAGCAGAAAGAAGAGGGACTGTACCCTCCCTTAGCTTCCCTCARATCACTCTTTGGCAACGACCACTAGTCACAATAAAAGTAGGGGGACARCTAAAAGAAGCTCTATTAGATACAGGAGCAGATGATACAGTATTAGAAGACATAAATTTGCCAGGAAAATGGAAACCAAAAATGATAGGGGGAATTGGAGGTTTTATCAAAGTAAAACAGTATGATAACATACTTATAGAAATTTGTGGACACAAGGCTATAGGTACAGTGTTGGTAGGACCTACACCTGTCAACATAATTGGAAGGAACATGTTGACTCAGCTTGGTTGTACTTTAAATTTTCCAATTAGTCCTATTGAAACTGTACCAGTAAAATTGAAGCCAGGAATGGATGGCCCAAAGGTTAAACAATGGCCATTGACAGAAGAAAAAATAAAAGCATTAACAGAAATATGTACAGAAATGGAAAAAGAAGGAAAAATTTCAAAAATTGGGCCTGAAAATCCATACAATACTCCAGTATTTGCCATAAAGAAAAAAGACAGTACTAAATGGAGGAAATTAGTAGATTTCAGAGAACTTAATAAAAGAACTCAAGATTTTTGGGAGGTTCAATTAGGAATACCRCATCCTGCAGGGTTAAAAAAGAAAAAGTCAGTAACAGTACTGGATGTGGGGGATGCWTATTTCTCAGTTCCCTTAGATGAGGATTTCAGGAAGTACACTGCATTCACCATACCTAGTGTCAACAATGAGACACCAGGAATTAGRTACCAGTACAATGTGCTTCCACAAGGATGGAAAGGATCACCAGCAATATTYCAATGTAGCATGACAAAAATCTTAGATCCCTTTAGARCAAAAAATCCAGACTTAGTTATCTACCAATACATGGATGATTTGTATGTAGGGTCTGACTTAGAAATAGGGCAGCATAGAACAAAAGTAAAGGAGTTAAGAGAACATCTAYTGAAATGGGGATTTACTACACCAGACAAAAAACATCAAAAAGAACCCCCATTCCTTTGGATGGGGTATGAACTCCATCCTGACAAATGGACAGTGCAGCCTATACAATTGCCAGACAAGGATAGCTGGACTGTCAATGATATACAGAAGTTAGTAGGAAAACTAAATTGGGCAAGTCAAATTTATCCAGGGATTAAAGTAAAGCAATTATGTAAACTCCTTAGGGGAGCTAAGACACTAACAGATATAGTGCCACTGACTACAGAAGCAGAGTTAGAATTGGCAGAGAATAGGGAGATTCTAAAAGAACCAGTACATGGGGTATATTATGACCCGTCAAAAGACTTAATAGCAGAAATACAGAAACAAGGGCATGGGCAATGGACATATCAAATTTATCAAGAGCCATTTAAAAATCTAAAAACAGGAAAGTATGCAAAAATGAGGTCTGCCCACACTAATGATGTAAAACAATTAACAGAAGCAGTGCAAAAGATAGCTCTAGAAAGCATAGTAATATGGGGAAAGACTCCTAAGTTTAAACTACCCATATTAAAAGAGACATGGGATACATGGTGGACAGAGTATTGGCAAGCCACCTGGATTCCTGAATGGGAGTTTGTCAATACCCCCCCTCTAGTAAAACTATGGTATCAGTTAGAAACAGAGCCCATAGCAGGAGCAGAAACCTTCTATGTAGATGGAGCAGCTAATAGAGAAACCAAAAAAGGAAAAGCAGGATATGTTACTGACAGAGGAAAACAAAAGGCTGTTTCCCTAACCGAGACCACAAATCAGAAGGCTGAGTTACAAGCAATTCAATTAGCTTTACAGGATTCAGGATCAGAAGTGAACATAGTGACAGACTCACAGTATGCATTAGGAATCATTCAAGCACAACCAGATCAGAGTGAATCAGAGTTAGTCAATCAAATAATAGAACAATTAATACAAAAGGAAAAGATCTACCTGTCATGGGTACCAGCACACAAAGGGATTGGAGGGAATGAACAAGTAGATAAATTAGTCAGTGCTGGAATCAGAAAAATACTGTTTTTAGATGGGATAGATAAAGCACAGGAGGAACATGAAAAATATCACAACAATTGGAGAGCAATGGCTAGTGATTTTAATCTGCCACCTGTAGTAGCAAAAGAAATAGTAGCTAGCTGTGATAAGTGTCAGCTAAAAGGGGAAGCCATGCATGGACAAGTAGATTGAGTCCAGGGATATGGCAATTAGATTGTACACATTTAGAAGGAAAAGTTATTCTGGTAGCAGTCCATGTAGCTAGTGGGTACCTAGAAGCAGAAGTTATCCCAACAGAAACAGGACAAGAAACAGCCTACTTCATACTAAAGTTAGCAGGAAGATGGCCAGTAAAAACAATACATACAGACAATGGCACCAATTTCACCAGTGCCGCGGTTAAGGCAGCCTGTTGGTGGGCAGGTATCCAACAGGAATTTGGAATTCCCTACAACCCCCAAAGTCAAGGAGTAGTAGAATCTATGAATAAAGAGCTAAAGAAGATTATAAAACAGGTAAGAGATCAAGCTGAACATCTTAAGACAGCAGTACAAATGGCAGTATTCATCCACAATTTTAAAAGAAAAGGGGGGATTGGGGGATACAGTGCAGGGGAAAGAATAATAGACATAATATCATCAGACATACAAACTAAAGAATTACAAAAACAAATTATAAAAATTCGAAATTTCCGGGTTTATTACAGGGACAGCAGAGACCCAGTTTGGAAAGGACCAGCAAAGCTACTCTGGAAAGGTGAAGGGGCAGTAGTCATACAAGACAATAGTGAAATAAAGGTAGTACCAAGAAGAAAAGCAAAGATCATTAGGGATTATGGAAAACAGATGGCAGGTGATGATTGTGTGGCAGGTAGACAGGATGAGGATTAACACATGGAAAAGTTTAGTAAAATACCATATGCATGTTTCAAAGAAAGCCAAAAGATGGTCTTATAAACATCACTTTGAAAGCAGGAATCCAAGAGTAAGTTCAGAAGTACACATTCCATTAGAGGAAGCTAAATTAGTAATAACAACATACTGGGGGCTGCATACAGGAGAAAGAGATTGGCATCTGGGTCAGGGAGTCTCCATAGAATGGAGGCAGGGGAGGTATAGCACACAAATAGACCCTGGCCTGGCAGACCAACTGATCCATATATATTATTTTGATTGTTTTGCAGAATCTGCCATAAGGAAAGCCATATTAGGATATAAAGTTAGCCCTAGGTGTAACTATCAAGCAGGACATAACAAGGTAGGATCTCTACAATATTTGGCACTAACAGCATTAATAGCTCCAAAGAAGACAAAGCCGCCTTTGCCTAGTGTCAAGAAACTAGTAGAAGACAGATGGAACAAACCCCAGGAGAACAGGGGCCACAGAGGGAGCCATACAATGAATGGACACTAGAGCTTTTAGAGGAGCTTAAGAATGAAGCTGTTAGACATTTTCCTAGGCCCTGGCTACTTGGCTTAGGACAACATATCTATAACACCTATGGGGATACTTGGGAGGGAGTTGAAGCTATAATAAGGATATTGCAACAACTACTGTTTATCCATTTCAGAATTGGGTGCCATCATAGCAGAATAGGCATTACTCGACAGAGAAGAGTAAGAAATGGAGCTAGTAGATCCTAACTTAGATCCCTGGAACCATCCAGGAAGCCAGCCTACAACTCCTTGTACAAAATGCTATTGTAAACGATGTTGCTTTCATTGTCAATGGTGCTTTACAACGAAGGGCTTAGGCATCTCCTATGGCAGGAAGAAGCGGAAACAGCGACACCGAACTCCTCAGAGCAGCCAGATACATCAAGATCTTGTACCAAAGCAGTAAGTAGTATATGTAATGTCTGATTTGTTAGCAATAAGTGTAACAGCATTAATAGTAGCACTAATAATAGCAATAGTTGTGTGGACTATAGTATATATAGAATATAGGAAACTGTTAAGGCAAAGAAAAATAAATAGGTTATATGAAAGAATAAGAGAAAGAGCAGAAGACAGTGGCAATGAGAGTGAGGGGGATGCAGAGGAACTGGCAGCACTTGGGGAAATGGGGCCTTTTATTCCTGGGGATATTGTTAATCTGTAATGCTGAAAACTTGTGGGTCACAGTCTATTATGGGGTACCTGTGTGGAAAGATGCAACCACTACTCTATTCTGTGCATCAGATGCTAAATCATATGAGAGAGAGGTACATAATGTCTGGGCTACACATGCCTGTGTACCCACAGATCCCAATCCACAAGAAGTAGTTCTGGAAAATGTAACAGAAAATTTTGATATGTGGAAAAATAGCATGGTAGAACAAATGCATACAGATATAATCAGTTTATGGGATCAAAGCCTAAAGCCATGTGTGAAGTTAACCCCACTCTGTGTTACTTTAAATTGTACTAATGCCATTAATGCCACTGCCATTCAAGACGGGGACCTGAAGGAAGAACCAGGGGCAATACAAAACTGTTCTTTCAATRTGACCATGGAAGTAAGAGATAAGCAGCAGAAAGTACATGCACTGTTTTATAGACTTGATATAGTACCAATTAGCAATGGAAGAAATGGCAGTGGAGACTACTACAGGCTAATAAATTGCAATACCTCAACCATTACACAGGCTTGTCCAAAAGTATCTTGGGATCCAATTCCCATACATTATTGTGCTCCAGCTGGTTATGCGATTCTAAAGTGTAATGATAAAAAGTTCAATGGGACAGGACCATGCAGGAATGTCAGCACAGTACAATGTACACATGGAATTAAACCAGTGGTATCAACTCAATTGTTGTTAAATGGCAGCCTAGCAGAAGAAGATATAATAATCAGATCTCAAAATATCTCAGATAATGCAAAAACCATAATAGTACACTTTAATGAATCTGTACAGATTAATTGTACAAGACCCAACAACAATACAAGAAAARGTATACATWTAGGACCAGGACGAGCATTTTATGCAACAGGAGACATAATAGGAGACATCAGAAAGGCCCATTGTAATGTTAGTGGAACACAATGGAATAAAACATTAGAACAAGTAAGGGCAAAGTTAAAGTCTCATTTTCCTAATGCAACAATAAAATTTAATTCATCCTCAGGAGGGGACCTAGAAATTACAATGCATAGTTTTAATTGTAGAGGAGAATTTTTCTACTGCAATACATCAGGACTGTTTAATGACACAGGATCCAATGGCACTATCACTCTCCTATGTCGAATAAAACAAATGGTAAACATGTGGCAGGAAGTGGGACGAGCAATGTATGCCGCTCCCATCTCAGGAAACATTACCTGTAACTCGAATATTACAGGTCTACTATTGACAAGAGATGGTGGTCAGAATAATAATCAGACTGAGACCTTCAGACCTGGGGGAGGAAATATGAAAGACAATTGGAGAAGTGAATTATATAAGTATAAAGTAGTAGAAATTGAACCACTAGGAGTAGCACCCACCAGGGCAAAAAGACAAGTGGTGAGGAGAGAAAAAAGAGCAGTGGGAATGGGAGCTTTGTTCCTTGGGTTCTTGAGCGCGGCAGGAAGCACTATGGGCGCGGCGTCAATAACGCTGACGGTACAGGCCAGACAATTATTGTCTGGAATAGTGCAACAGCAGAGTAATCTGCTGAGGGCTATTGAAGCGCAACAGCATCTGTTGCAGCTCACAGTCTGGGGCATTAAACAGCTCCAGGCAAGAGTCCTGGCCGTGGAAAGATACCTACAGGATCAACAGCTCCTAGGACTTTGGGGCTGCTCTGGAAAACTCATCTGCACCACTAATGTGCCCTGGAACTCTAGTTGGAGTAATAAATCTCAGGAGGAGATTTGGGAGAACATGACCTGGATGGAATGGGAAAAAGAGATTAGCAATTACTCAAATGAAATATACAGGTTAATTGAAAAATCACAGAACCAGCAGGAAAAGAATGAACAAGAATTATTGGCATTGGACAAATGGGCAAGTCTGTGGAATTGGTTTAGCATATCAAACTGGCTGTGGTATATAAAAATATTCATAATGATAGTAGGAGGCTTGATAGGCTTAAGAATAGTTTTTGCTGTGCTTTCTATAGTAAATAGAGTTAGGAAGGGATACTCACCTTTGTCATTTCAGACCCATATCCCAAGCCCGAGGGAACCCGACAGGCCCGAAGAAATCGAAGAAGGAGGTGGAGAGCAAGGCAGAGACAGATCCGTGAGATTAGTAGACGGATTCTTAGCTCTTGTCTGGGACGACCTGAGGAACCTGTGCCTCTTCAGCTACCACCACTTGAGAGACTTACTATTAATAACAGCGAGGATTGTGAACAGGGGGCTGAGGAGGGGGTGGGAAGCCCTCAAACTTCTGGGGAATCTCACGCTGTATTGGGGTCAGGAACTAAAGAATAGTGCTATTGGCTTGTTTAACACCACAGCAATAGTAGTAGCTGAGGGAACAGATAGAATTATAGCAGCTTTGCAAAGAATTGGTAGAGCTATTCTGAACATACCTACAAGAATAAGACAGGGCTTCGAAAGGGCTTTGCTATAAAATGGGTGGCAAATGGTCAAAAAGTAGTGTAATTGGATGGCCTGCTATAAGGGAAAGAATGAGACGAGCCCCTCCAGCAGCAGAAAGGGGAGGAGCAGCTCCAGCAGCAGAAGGGGTGGGAGCAGTGTCTCAGGACTTAGAAAGACGGGGGGCAATTACAAGCAGCAATACTAGAGCTAATAATCCTGACTTGGCCTGGCTAGAAGCACAAGAGGAAGAAGAAGTAGGCTTTCCAGTCACACCTCAGGTACCTTTAAGACCAATGACTTATAAGGCAGCCTTCGATCTCGGCTTCTTTTTAAAAGAAAAGGGGGGACTGGAAGGGTTAATTTATTCCAAGAAAAGACAAGAGATCCTTGATCTGTGGGTCTACCACACACAAGGCTTCTTCCCTGATTGGCAGAACTACACACCAGGGCCAGGGGTCAGATATCCACTGACCTTTGGGTGGTGTTTCAAGCTAGTACCAGTTGACCCAGAGGAGGTAGAAAAGGCCAATGAAGGAGAGAACAACTGCTTGCTACACCCCATGAGCCAACATGGAATGGATGATGAAGACGGAGAAGTACTGATGTGGAAGTTTGACAGCAGCCTGGCACGGAGACACATAGCCAGAGAGAAACATCCGGAGTTCTACCAAGGCTGAGACTGCTGACACAGAGATTGCTGACACAGAAGAATCTAAAGGGACTTTCCACCGGGGACTTTCCAGAGGGCGGGCCAGAGGGCGGTACTGGGGAGTGGCTCACCCTCAGATGCTGCATATAAGCAGCCGCTTTTCGCCTGTACTGGGTCTCTCTAGTTAGACCAGATCTGAGCCCGGGAGCTCTCTGGCTAGCTAGGGAACCCACTGCTTAAGCCTCAATAAAGCTTGCCTTGAGTGCTTCAAGTAGTGTGTGCCCGTCTGTTGTGT
>F1.BR.89.BZ126_AY173957_K.CM.96.MP535_AJ249239
CAGTGGCGCCCGAACAGGGACGCGAAAGCGAAAGTAGAACCAGAGAAGATCTCTCGACGCAGGACTCGGCTTGCTGAAGTGCACACGGCAAGAGGCGAGAGGGGCGACTGGTGAGTACGCCAAATTTTGACTAGCGGAGGCTAGAAGGAGAGAGATGGGTGCGAGAGCGTCAGTATTAAGCGGGGGAAAACTAGATGCATGGGAAAAAATTCGGTTGAGGCCGGGGGGAAAGAAAAAATATAGATTGAAGCATCTAGTATGGGCAAGCAGGGAGCTAGAACGATTTGCAATTAATCCTGGCCTTCTAGAAACATCAGAAGGCTGTCAAAAAATAATAGGACAGTTACAACCATCCCTTCAGACAGGATCAGAAGAGCTTAGATCATTATATAATACAGTAGCAGTCCTCTATTTTGTACATCAAAGRATAGAGGTAAAGGACACCAAGGAAGCTTTAGACAAGCTAGAGGAAGAACAAAACAAAAATCAGCAAAAGACAAAGCAAGCGGCAGCTGACAAAGGGGTCAGTCAAAATTACCCTATAGTACAGAATCTTCAGGGACAAATGGTACATCAGTCTATATCACCTAGAACTTTAAATGCATGGGTAAAGGTGATAGAAGAGAAGGCTTTTAGCCCAGAAGTAATACCCATGTTTTCAGCATTATCAGAAGGGGCCACTCCACAAGATTTAAACACCATGTTAAATACAGTGGGGGGACATCAAGCAGCCATGCAAATGTTAAAAGACACCATCAATGAGGAAGCTGCAGAATGGGACAGATTACATCCAGCGCAGGCAGGACCTATCCCACCAGGCCAGATAAGGGAACCTAGGGGAAGTGATATAGCTGGAACTACTAGTACCCTTCAGGAACAAATACAATGGATGACAAGCAACCCACCTGTCCCAGTGGGAGAAATCTATAAAAGATGGATCATCCTAGGATTAAATAAAATAGTAAGAATGTATAGCCCTGTCAGCATTTTGGACATAAGACAAGGGCCAAAGGAGCCCTTTAGAGACTATGTAGACAGGTTCTTTAAAACCCTAAGAGCTGAGCAAGCTACACAGGAAGTAAAGGGTTGGATGACAGACACCTTGTTGGTCCAAAATGCGAACCCAGATTGTAAGACCATTTTAAAAGCATTGGGACCAGGGGCTACACTAGAAGAAATGATGACAGCATGTCAGGGAGTGGGAGGACCTGGCCATAAGGCGAGAGTTTTGGCTGAGGCAATGAGCCAAGCAACAAATGCAACTATACTGATGCAGAAAAGTAACTTTAAGGGCCAAAGAAGAATTGTTAAATGTTTTAATTGTGGCAAAGCAGGACACATAGCCAAAAATTGTAGGGCCCCTAGAAAAAAGGGCTGTTGGAAATGTGGAAGAGAAGGACACCAAATGAAAGACTGCACTGAAGGACAGGCTAATTTTTTAGGGAAAATTTGGCCTTCCCACAAGGGGAGGCCCGGAAATTTCCTTCAGAACAGGCCAGAGCCAACAGCCCCACCAGCAGAGAGCTTCGGGTTCAGAGAGGAGATAAACCCCTCTCCGAAGCAGGAGCAGAAAGAAGAGGGACTGTACCCTCCCTTAGCTTCCCTCAAATCACTCTTTGGCAACGACCACTAGTCACAATAAAAGTAGGGGGACAGCTAAGGGAAGCTCTATTAGATACAGGAGCAGATGATACAGTATTAGAAGACATAAATTTGCAAGGAAAATGGAAACCAAAAATGATAGGGGGAATTGGAGGTTTTATCAAAGTAAAACAGTATGATAACATACTTATAGAAATTTGTGGACACAAGGCTATAGGTACAGTGTTGGTAGGACCTACGCCTGTCAACATAATTGGAAGAAACATGTTGACTCAGATTGGTTGTACTTTAAATTTTCCAATTAGTCCTATTGAAACTGTACCAGTAAAATTGAAGCCAGGAATGGATGGCCCAAAGGTTAAACAATGGCCATTGACAGAAGAAAAAATAAAAGCATTAACAGAAATATGTACAGAAATGGAAAAAGAAGGAAAAATTTCAAAAATTGGGCCTGAAAATCCATACAATACTCCAGTATTTGCCATAAAGAAAAAAGACAGTACTAAATGGAGAAAATTAGTAGATTTCAGAGAACTTAATAAAAGAACTCAAGATTTTTGGGAGGTTCAATTAGGAATACCACATCCTGCAGGGTTAAAAAAGAAAAAGTCAGTAACAGTACTGGATGTAGGGGATGCATATTTCTCAGTTCCCTTAGATAAGGATTTCAGGAAGTACACTGCATTCACCATACCTAGTGTCAACAATGAGACACCAGGAATTAGGTACCAGTACAATGTGCTTCCACAAGGATGGAAAGGATCACCAGCAATATTCCAATGTAGCATGACAAAAATCTTAGATCCCTTTAGAACAAAAAATCCAGACTTAGTTATCTACCAATACATGGATGATTTGTATGTAGGGTCTGACTTAGAAATAGGGCAGCATAGAACAAAAGTAGAGGAGTTAAGAGAACATCTACTGAAATGGGGATTTACTACACCAGACAAAAAACATCAAAAAGAACCCCCATTCCTTTGGATGGGGTATGAACTCCATCCTGATAAATGGACAGTGCAGCCTATACAATTGCCAGACAAGGATAGCTGGACTGTCAATGATATACAGAAGTTAGTAGGAAAACTAAATTGGGCAAGTCAGATTTATCCAGGGATTAAAGTAAAGCAATTATGTAAACTCCTTAGRGGAGCYAAGACACTAACAGACATAGTGCCACTGACTACAGAAGCAGAGTTAGAATTGGCAGAGAATAGGGAGATTCTAAAAGAACCAGTACATGGGGTATATTATGACCCGTCAAAAGACTTAATAGCAGAAATACAGAAACAAGGGAATGACCAATGGACATATCAAATATATCAAGAGCCACATAAAAATCTGAAAACAGGGAAGTATGCAAGAATGAGATCTGCCCACACTAATGATGTAAAACAATTAACAGAAGCAGTGCAAAAGATAGCTCTAGAAAGCATAGTAATATGGGGAAAGACTCCTAAGTTTAAACTACCCATACTAAAAGAGACATGGGACACATGGTGGACAGAGTATTGGCAAGCCACCTGGATTCCTGAATGGGAGTTTGTCAATACCCCCCCTCTAGTAAAACTATGGTATCAGCTAGAAACAGAGCCCATAGCAGGAGCAGAAACCTTCTATGTAGATGGGGCAGCTAATAGAGAGACCAAAAAAGGAAAAGCAGGATATGTTACTGACAGAGGAAAACAAAAGACTGTCTCCCTAACCGAGACCACAAATCAGAAGGCTGAGTTACAAGCAATTCAGTTAGCTTTACAGGATTCAGGATCAGAAGTGAACATAGTAACAGACTCACAGTATGCATTAGGAATCATTCAAGCACAACCAGATAAGAGTGAATCAGAGTTAGTCAATCAAATAATAGAGCAATTAATACAAAAGGAAAAGGTCTACCTGTCATGGGTACCAGCACACAAAGGGATTGGAGGAAATGAACAAGTAGATAAATTAGTCAGTGCTGGAATCAGAAAAATACTGTTTTTAGATGGGATAGATAAAGCACAGGAGGAACATGAAAAATATCACAACAATTGGAGAGCAATGGCTAGTGATTTTAATCTGCCACCTGTAGTAGCAAAAGAAATAGTAGCTAGCTGTGATAAGTGTCAGCTAAAAGGGGAAGCCATGCATGGACAAGTAGATTGTAGTCCAGGGATATGGCAATTAGATTGTACACATTTAGAAGGAAAAGTTATTCTAGTAGCAGTCCATGTAGCTAGTGGGTACCTAGAAGCAGAAGTKATCCCAACAGAAACAGGGCAAGAAACAGCCTACTTCATACTAAAGTTAGCAGGAAGATGGCCAGTAAAAACAATACATACAGACAATGGCACTAATTTCACCAGTGCCGCGGTTAAGGCAGCCTGTTGGTGGGCAGGTATCCAGCAGGAGTTTGGAATTCCCTACAACCCCCAAAGTCAAGGAGTAGTAGAATCTATGAATAAAGAGCTAAAGAAGATCATAAGACAGGTAAGAGATCAAGCTGAACATCTTAAGACAGCAGTACAAATGGCAGTATTCATCCACAATTTTAAAAGAAAAGGGGGGATTGGGGGATACAGTGCAGGGGAAAGAATAATAGACATAATATCATCAGACATACAAACTAAAGAATTACAAAAACAAATTATAAAAATTCGAAATTTCCGGGTTTATTACAGGGACAGCAGAGACCCAGTTTGGAAAGGACCAGCAAAGCTACTCTGGAAAGGTGAAGGGGCAGTAGTCATACAAGACAATAGTGAAATAAAGGTAGTACCAAGAAGAAAAGCAAAGATCATTAGGGATTATGGAAAACAGATGGCAGGTGATGATTGTGTGGCAGGTAGACAGGATGAGGATTAACACATGGAAAAGTTTAGTAAAATACCATATGTATGTTTCAAAGAAAGCCAAAAGATGGTCTTATAGACATCACTTTGAAAGCAGGAATCCAAGAGTAAGTTCAGAAGTACACATTCCATTAGAGGAAGCTAAATTAATAATAACAACATACTGGGGGCTGCATACAGGAGAAAGAGATTGGCATCTGGGTCAGGGAGTCTCCATMGAATGGAGGCAGGGGAGGTATAGCACACAAATAGACCCTGGCCTGGCAGACCAACTGATCCATATATATTATTTTGATTGTTTTGCAGAATCTGCCATAAGGAAAGCCATATTAGGACATAAAGTTAGCCCTAGGTGTAACTATCAAGCAGGACATAACAAGGTAGGATCTCTACAATATTTGGCACTAAYAGCATTAATAGCTCCAAAGAAGACAAAGCCGCCTTTGCCTAGTGTCAAGAAACTAGTAGAAGACAGATGGAACGAGCCCCAGGAGACCAGGGGCCACAAAGGGAGCCATACAATGAATGGACACTAGAGCTTTTAGAGGAGCTTAAGAATGAAGCTGTTAGACATTTTCCTAGGCCCTGGCTACATGGCTTAGGACAACATATCTATAACACCTATGGGGATACTTGGGAGGGAGTTGAAGCTATAATAAGGATATTGCAACAACTACTGTTTATCCATTTCAGAATTGGGTGCCAGCATAGCAGAATAGGCATTACTCGACAGAGAAGAGTAAGAAATGGAGCTAGTAGATCCTAACTTAGACCCCTGGAACCATCCAGGAAGCCAGCCTGCAACTCCTTGTACCAAATGCTATTGTAAACGATGTTGCTTTCATTGTCAATGGTGCTTTACAACAAAGGGCTTAGGCATCTCCTATGGCAGGAAGAAGCGGAAACAGCGACACCGAACTCCTCAGAGCAGTCAGATACATCAAGATCTTGTACCAAAGCAGTAAGTAATATATGTAATGTCCTACTTTTTAGCAATAAGCATAACAGCATTAATAGTAGCATTAATAATAGCAATAGTTGTGTGGACTATAGCATATATAGAATATAGGAAACTGTTAAGGCAAAGAAAAATAAATAGGTTATATGAAAGAATAAGAGAAAGAGCAGAAGACAGTGGCAATGAGAGTGAGGGGGATGCAGAGGAATTGGCAGCACTTGGGGAAATGGGGCCTTTTATTCCTGGGGATATTGATAATCTGTAATGCTGAAAACTTGTGGGTCACAGTCTATTATGGGGTACCTGTGTGGAAAGAAGCAACCACTACTCTATTCTGTGCATCAGATGCTAAATCATATGAAAAAGAGGTACATAATGTCTGGGCTACACATGCCTGTGTACCCACAGATCCCAATCCACAAGAAGTAGTTCTGGAAAATGTAACAGAAAATTTTGATATGTGGAAAAATAACATGGTAGAACAAATGCATACAGATATAATCAGTTTATGGGATCAAAGCCTAAAGCCATGTGTGAAGTTAACCCCACTCTGTGTTACTTTACATTGTACTAGTGCCACTCCTAATGCCACTGCCACTCAAAACGGAACAACCCTGAAGGAAGAACCAGGGGCAATACAAAACTGTTCTTTCAATATGTCCACAGAAGTAAGRRATAAGCAGCAGAAAGTACATGCACTTTTTTATAAACTTGATATAGTACCAATTAGCAATAGCAGTAATAACAGTAGAGAATACAGACTAATACATTGCGATACCTCAACCATTACACAGGCTTGTCCAAAGGTATCTTGGGATCCAATTCCCATACATTATTGTGCTCCAGCTGGTTATGCGATTCTAAAATGTAATGATAAAAAGTTCAATGGGACGGGACCATGCAAGAATGTCAGCACAGTACAATGTACACATGGAATTAAACCAGTGGTATCAACTCAATTGTTGTTAAATGGCAGCCTAGCAGAAGAAGATATAATAATCAGATCCCAAAATATCTCAGATAATGCAAAAACCATAATAGTACACTTTAATGAATCTGTACAGATTAATTGTACAAGACCCAACAACTATACAAGAAAAAGTATATATTTWGGACCAGGACGAGCATTTCATACAGCAGGAAAAATAATAGGAGACATCAGAAAGGCCCATTGTAACGTTAGTGGAACACAATGGAATAAAACATTAGAACGGGTAAGGGCAAAGTTAAAGTCTCATTTCCCTAATACAACAATAAAATTTAAMTCATCCTCAGGAGGGGACCTAGAAATTACAATGCATAGTTTTAATTGTAGAGGAGAATTTTTCTACTGCAATACATCAGGACTGTTTAATGACACAGGATCCAATGGCACTATCACTCTCCTATGTCGCATAAGACAAATTGTAAACATGTGGCAGGAAGTAGGACGAGCAATGTATGCCGCTCCCATTGAAGGAAACATTACCTGTAACTCAAATATTACAGGTCTACTATTGACAAGAGATGGTGGTCAGAATAGTAATCAGACTGAGACCTTCAGACCTGGGGGAGGAAATATGAAAGACAATTGGAGAAGTGAATTATATAAGTATAAAGTAGTAGAAATTGAACCACTAGGAGTAGCACCCACCAGGGCAAAAAGACAAGTGGTAAAGAGAGAAAAAAGAGCAGCAGTAATAGGAGCTTTGTTCCTTGGGTTCTTGAGCGCGGCAGGAAGCACTATGGGCGCGGCGTCAATAGCGCTGACGGTACAGGCCAGACAATTATTGTCTGGAATAGTGCAACAGCAGAGCAATCTGCTGAGGGCTATTGAAGCGCAACAGCATCTGTTGCAGCTCACAGTCTGGGGCATTAAACAGCTCCAGGCAAGAGTCCTGGCTGTGGAAAGATACCTACAGGATCAACAGCTCCTAGGACTTTGGGGCTGCTCTGGAAAACTCATCTGCACCACTAATGTGCCCTGGAACTCTAGTTGGAGTAATAAATCTCAGGAGGAGATTTGGGAGAACATGACCTGGATGGAGTGGGAAAAGGAGATTAGCAATTACTCATACGAGATATACAGGTTAATTGAACAATCACAGAACCAGCAGGAAAAGAATGAACAAGAATTATTGGCATTGGACAAATGGGCAAGTCTGTGGAATTGGTTTGACATATCAAATTGGCTGTGGTATATAAAAATATTCATAATGATAGTAGGAGGCTTGATAGGCTTAAGAATAGTTTTTGCTGTGCTTTCTATAGTAAATAGAGTTAGGAAGGGATACTCACCTTTGTCATTACAGACCCATATCCCAAGCCCGAGGGAACCCGACAGGCCCGAAGGAATCGAAGAAGGAGGTGGAGAGCAAGGCAACGAGAGATCCGTGCGCTTAGTGAACGGATTCTTACCTCTTGTCTGGGACGACCTGAGGAACCTGTGCCTCTTCAGCTACCGCCACTTGAGAGACTTAATATTAATAGCAGCGAGGATTGTGAACAGGGGGCTGAGGAGGGGGTGGGAAGCCCTCAAACTTCTGGGGAATCTCACGCTGTATTGGGGTCAGGAACTAAAGAATAGTGCTATTAGCTTGCTTAACACCACAGCAATAGTAGTAGCTGAGGGAACAGATAGAATTATAGCAGCTTTGCAAAGAATTGGTAGAGCTATTCTTAACATACCTACAAGAATAAGACAGGGCTTCGAAAGGGCTTTGCTGTAAAATGGGTGGCAAGTGGTCAAAAAGTAGCATAGTTGGATGGCCTGCTATAAGGGAAAGAATGAGACGAGCCCCTCCAGCAGCAGAARGGGAGGGAGCAGCTCCAGCAGCAGAAGGGGTGGGAGCAGTRTCTCAAGACTTAGAAAGAAGGGGGGCAATTACAAGCARCAATACTAGAGCTAATAATCCTGACTTGGCCTGGCTRGAAGCACAAGAGGATGAAGAAGTAGGCTTTCCAGTCAAACCTCAGGTACCTTTAAGACCAATGACTTATAAGGCAGCTTTCGATCTCGGCTTCTTTTTAAAAGAAAAGGGGGGACTGGAAGGGTTAATTTATTCCAAGAAAAGACAAGAGATCCTTGATCTGTGGGTCTACCACACACAAGGCTTCTTCCCTGATTGGCAGAACTACACACCAGGGCCAGGGGTCAGATATCCACTGACCTTTGGGTGGTGCTTCAAGCTAGTACCAGTTGACCCAGAGGAGGTAGAAAAGGCCAATGAAGGAGAGAACAACTGCTTGCTACACCCCATGAGCCAACATGGAATGGATGATGAAGACGGAGAAGTACTGATGTGGAAGTTTGACAGCAGCCTGGCACGGAGACACATAGCCAGAGAGAAACATCCGGAGTTCTACCAAGGCTGAGACTGCTGACACAGAGATTGCTGACACAGAAGAATCTAAAGGGACTTTCCACTGGGGACTTTCCAGAGGGCGGGCCAGAGGGCGGTACTGGGGAGTGGCTCACCCTCAGATGCTGCATATAAGCAGCCGCTTTTCGCCTGTACTGGGTCTCTCTAGTTAGACCAGATTTGAGCCCGGGAGCTCTCTGGCTAGCTAGGGAACCCACTGCTTAAGCCTCAATAAAGCTTGCCTTGAGTGCTTCAAGTAGTGTGTGCCCGTCTGTTGTGTGACTCTGGTAACTAGAGA
>F2.CM.02.02CM_0016BBY_AY371158_G.ES.00.X558_AF423760
GCGAGAGCGTCAGTATTAAGCGGGGGAAAATTAGATGACTGGGAGAAAATTCGGTTAAGGCCGGGAGGGAAGAAAAAATATAGGCTAAAACATATAGTATGGGCAAGCAAGGAGCTAGAACGATTTGCACTTAATCCTGGCCTTTTAGAGACAACAGAAGGCTGTAAACAAATAATAGGACAACTACAATCATCCCTTCAGACAGGATCAGAAGAGATTAAATCATTATATAACACAGTAGCAGTCCTCTATTATGTACATCAAAAGATACAAATAAGAGACACCAAGGAAGCTTTAGATAAGCTACAGGAAGAACAAGACAAATATCAGCAAAAAACACAACCAGCAGCGGCTGATAAAGGGGTCAGTCAAAATTACCCTATAGTACAGAATCTTCAGGGGCAAATGGTACATCAGGCTATATCACCTAGAACTCTAAATGCATGGGTAAAAGTAATAGAAGAGAAGGCTTTCAGCCCAGAAGTCATACCCATGTTTTCAGCATTATCAGAAGGGGCCACCCCACAAGATTTAAACACCATGCTAAACACAGTAGGGGGACATCAAGCAGCCATGCAAATGTTAAAAGATACCATCAATGAGGAAGCTGCAGAATGGGACAGGTTACATCCAGTGCAGGCAGGACCTATCCCACCAGGTCAGATAAGAGAACCTAGGGGAAGTGATATAGCAGGAACTACTAGTACCCTTCAGGAACAAATAGCATGGATGACAAGCAACCCACCTGTCCCAGTAGGAGAAATTTATAAAAGATGGATAATCCTAGGATTAAATAAAATAGTAAGAATGTATAGCCCTGTCAGCATTTTGGACATAAGACAAGGGCCAAAAGAACCCTTTAGAGACTATGTAGACAGGTTCTTTAAAACTCTAAGAGCTGAGCAAGCTACACAGGAAGTAAAAGGCTGGATGACAGACACCTTGTTGGTCCAAAATGCGAACCCAGATTGTAAGACCATTTTAAAAGCACTAGGACCAGGGGCTACACTAGAAGAAATGATGACAGCATGTCAGGGAGTGGGAGGACCTGGCCATAAAGCAAGAATTTTGGCTGAGGCAATGAGCCAAGTAACAGCTACATCCGTACTGATGCAGAAAAGCAACTTTAAGGGCCAAAAAAGAATTGTCAAGTGTTTCAACTGTGGCAAAGAAGGACATATAGCTAAAAATTGCAGGGCCCCTAGAAAAAGGGGCTGTTGGAAATGTGGAAAGGAAGGACACCAAATGAAAGACTGCACTGAAAGACAGGCTAATTTTTTAGGGAAAATTTGGCCTTCCAACAAAGGGAGGCCTGGGAATTTCATTCAGAGCAGACCAGAGCCAACGGCCCCGCCAGCAGAGGGCTTCGGGTTCGGAGAAGAGATAACTCCCTCCCCGAAGCAGGAGCAGAAAGACAAGGGACTGTATCCTCCCTTGACTTCCCTCAAATCACTCTTTGGCAACGACCCGTAGTCACAATAAAGGTAGAGGGGCAACTAAGGGAGGCTCTATTAGATACAGGGGCAGATGATACAGTATTAGAAGATATAAATTTGTCAGGAAAATGGAAACCAAGAATGATAGGGGGAATTGGAGGTTTTATCAAAGTAAGACAGTATGATCAAGTACCCATAGAAATTTGTGGACAAAAGGCTATAGGTACAGTATTAGTAGGGCCTACGCCTGTCAACATAATTGGAAGAAATATGTTGACTCAGATTGGTTGTACTTTAAATTTTCCAATTAGTCCTATTGAAACTGTACCAGTAAAATTAAAGCCAGGAATGGATGGTCCAAAGGTTAAACAATGGCCATTGACAGAAGAAAAAATAAAAGCACTAACAGAAATCTGTACAGAGATGGAAAAAGAAGGAAAAATTTCAAAAATTGGGCCAGAAAATCCATACAATACTCCAGTATTTGCCATAAAGAAAAAGGACAGTACTAAATGGAGAAAACTAGTAGATTTCAGAGAGCTTAATAAAAGAACTCAAGATTTTTGGGAGGTTCAGTTAGGAATACCACACCCTGCAGGTTTAAAAAAGAAAAAATCAGTAACAGTATTGGATGTGGGGGATGCATATTTTTCAGTTCCCTTAGATAAGGAATTCAGGAAGTACACTGCATTCACCATACCTAGTATTAACAATGAGACACCAGGAATTAGATATCAGTACAATGTGCTTCCACAGGGATGGAAAGGGTCACCAGCAATATTCCAAAGTAGCATGACAAAAATCTTAGAGCCCTTTAGAGCAAGAAATCCAGAGATAGTTGTCTACCAATACATGGATGATTTGTATGTAGGGTCTGACTTAGAAATAGGGCAGCATAGGGCAAAAATAGAGGAGTTAAGAGAACATCTATTGAGATGGGGATTTACTACACCAGATAAAAAACATCAGAAGGAACCCCCATTTCTTTGGATGGGGTATGAACTCCATCCTGACAAATGGACAGTACAGGCTATACAATTGCCAAACAAGAGCAGCTGGACTGTCAATGATATACAGAAGTTAGTGGGAAAATTAAATTGGGCAAGTCAGATTTATCCAGGGATTAGAGTAAAGCACTTATGTAAACTCCTTAGGGGAGCCAAAGCACTAACAGACGTAGTGCCACTGACTGCAGAAGCAGAGCTAGAACTGGCAGAGAACAGGGAAATTCTAAAAGAACCAGTACATGGGGTATATTATGACCCATCAAAAGATTTAATAGCAGAAATACAGAAACAAGGGCATGATCAATGGACATATCAAATTTATCAAGAACCACATAGAAATCTGAAAACAGGAAAGTATGCAAAAAGGAGGTCTGCCCACACTAATGATGTAAAACAATTAACAGAAGTGGTACAAAAAATAGCCACAGAAGGCATAGTAATATGGGGAAAGGTCCCTAAATTTAGACTACCCATACAAAAAGAAACATGGGAAACATGGTGGACAGAGTATTGGCAAGCCACCTGGATTCCTGAATGGGAGTTTGTCAATACCCCTCCTCTAGTAAAATTATGGTACCAATTAGAAACAGAGCCCATAATAGGAGCAGAAACTTTCTATGTAGATGGGGCAGCTAGTAGAGAGACTAAAATAGGAAAAGCAGGATATGTTACTGACAGAGGAAGACAAAAGGTTGTCTCCCTAACTGAGACAACAAATCAGAAGACTGAATTACAAGCAATTCATTTAGCTTTGCAGGACTCAGGATCAGAAGTAAACATAGTAACAGACTCACAGTATGCATTAGGAATCATTCAAGCACACCCAGATAAGAGTGAATCAGAGTTAGTCAACCAAATAATAGAGCAATTAATACAAAAGGAAAAGGTCTACCTGTCATGGGTACCAGCACATAAAGGGATTGGAGGAAATGAACAAGTAGATAAATTAGTCAGTACAGGAATCAGGAAAGTACTGTTTTTGGATGGAATAGATAAGGCTCAAGAAGAACATGAAAAATATCACAACAATTGGAGAGCAATGGCTAGTGATTTTAATCTGCCACCTATAGTAGCAAAAGAAATAGTAGCCAGCTGTGATAAATGTCAGTTAAAAGGGGAAGCCATACATGGACAAGTAGACTGCAGTCCAGGGATATGGCAATTAGATTGTACACATTTAGAAGGAAAAATTATCCTGGTAGCAGTCCATGTAGCTAGTGGCTATATAGAAGCAGAAGTTATTCCAGCAGAAACGGGACAGGAAACAGCCTATTTCATATTAAAGTTAGCAGGAAGATGGCCAGTAAAAATAATACATACAGACAATGGCAGCAATTTCACCAGTACTGTGGTTAAGGCAGCCTGTTGGTGGGCAGGTATCCAACAGGAATTTGGAATTCCCTACAATCCCCAAAGTCAAGGAGTAGTAGAATCTATGAATAAAGAATTAAAGAAAATTATAGGACAAGTAAGAGATCAAGCTGAACATCTTAAGACAGCAGTGCAAATGGCAGTATTCATTCACAATTTTAAAAGAAAAGGGGGGATTGGGGGGTACAGTGCAGGGGAAAGAATAATAGACATAATAGCAACAGACATACAAACTAAAGAATTACAAAAACAGATCTCAAAAATCCAAAATTTTCGGGTTTATTTCAGAGACAGCAGAGACCCAATTTGGAAAGGACCAGCAAAGCTACTCTGGAAAGGTGAAGGGGCAGTAGTCATACAAGACAATAATGAAATAAAGGTAGTACCAAGAAGAAAAGTAAAAATCATTAGGGATTATGGAAAACAGATGGCAGGTGATGATTGTGTGGCAGGTAGACAGGATGAGGATTAGAACATGGAACAGTTTAGTAAAACACCATATGTATGTTTCAAGGAGAGCTCAAGGATGGTTTTATAGACATCACTATGAAAGCAGGCATCCAAGAGTAAGTTCAGAAGTACACATCCCTCTAGAGAATGATTCTAAATTAGTAATAGTAACCTATTGGGGTCTACATACAGGAGAAAAAGATTGGCATTTGGGTCATGGAGTCTCCATAGAATGGAGGCAGAAAAGGTATAGGACACAAGTAGATCCTGGCTTGGCAGACCAACTAATTCATAAATATTATTTTGATTGTTTTTCAGAATCTGCCATAAGGAAAGCCATATTAGGACATAGAGTTAGTCCTAGGTGTAACTATCAAGCAGGACATAACAAGGTAGGATCCCTACAATATTTGGCACTAACAGCACTAGTAACCCCAAAGAAGGTAAAGCCGCCTTTGCCTAGTGTCAAGAAACTAGTAGAGGATAAATGGAACAACCCCCAGAAGACCAAGGGCCACAGAGGGAGCCATACAATGAATGGACACTAGAGCTTTTAGAGGAGCTTAAGCATGAAGCTGTTAGACATTTTCCTAGAGAGTGGCTCCATGGCTTGGGACAGCATATCTATAATACCTATGGGGATACTTGGGAGGGAGTTGAAGCTATAATAAGGACACTGCAACAACTACTATTTATCCATTTCAGAATTGGGTGCCATCATAGCAGAATAGGCATTATTCGACAAAGAAGAATAAGAAATGGAAATGGTAGATCCTAAACTAGATCCCTGGAACCATCCAGGAAGTCAGCCTAAGAATCCTTGTAATAAATGTTATTGTAAAAGGTGTTGCTTTCATTGCCAACTGTGCTTTACAAGCAAGGGCTTAGGCATCTCCTATGGCAGGAAGAAGCGGAGACAGCGACGAAGCGCTTCTCACAGCAGTAAGGACCATCAAGATCCTGTATCAAAGCAGTAAGTAGTATATGTAATGTCATATTTGATAATATTAGTAATAGTAGCATTTATAGTAGCGCTAATAGCAGCAATAATTGTGTGGACTATAGTATATATAGAATATAAGAAACAGTTAAGGCAAAAAAGAATAAATAGGTTATATGAAAGAATAAGAGAAAGAGCAGAAGACAGTGGCAATGAGAGTGAGGGGGATGCAGAGGAATTGGCAGCACTTGGGGAAGTGGGGCTTTTTATTCCTGGGAATATTAATAATCTGTAATGCTGCAGATAACTTGTGGGTCACAGTCTATTATGGAGTACCAGTGTGGAAAGAAGCAACCACTACTCTATTTTGTGCATCGGATGCTAAAGCATATGAAAAAGAGGCACATAATGTCTGGGCTACACATGCCTGTGTACCTACAGACCCTGACCCACAAGAAATATTTCTGGACAATGTAACAGAAAATTTTAACATGTGGAAAAATAACATGGTAGACCAGATGCATGAAGATATAATCAGTTTATGGGATCAAAGCCTAAAACCATGTGTAAAGATAACCCCACTCTGTGTTACCTTACACTGTAGTGATGTTAATATTACGGCTAATAATACCAATCAGCCTAATAACATCACCCTGGAAGAGCAAGGGGAAATAAAAAACTGTTCTTTCAATATCACCACAGAGATAAAAGATAAGAGGAAAAATGAATTTGCAACTTTTTATAAACATGATATAGTACCAATTGAAAAAAATACGACATCCTATAGGCTAACAAGTTGTAATACCTCAACCGTTACACAGGCTTGTCCGAAGGTGTCCTTTGATCCAATTCCTATATATTATTGTGCTCCTGCTGGTTATGCGATTCTAAAGTGTAATGATAAAAGGTTCAATGGGAAAGGGTTATGCACGAATGTCAGCACAGTACAATGTACACATGGAATTAAACCAGTGGTATCAACTCAACTACTGTTAAATGGCAGCTTAGCAGAAAAAAATATAATAATTAGATCTGAAAATATCACAGATAATGCAAAAACCATAATAGTACAGTTTAATGAATCAGTAAAAATTAACTGTACAAGACCCAACAACAATACAAGAAAAAGTATACGTATAGGACCAGGACAAGTATTTTATGCAACAGGTGAGATAATAGGAGACATAAGAAAGGCACATTGTACCATTAATGGAACACTGTGGAATGCAACTTTAAATAGGGTAGCTGCAGAGGTCAAAAACCTCACTAATATTACAATAAAATTTGAGCCATCATCAGGAGGGGACCTAGAAGTTACAACACATAGTTTTAGTTGTGGAGGAGAGTTTTTCTACTGCGACACAACAGCACTGTTTAACACAACATTACTTAACACAACAATGGATAATAATGGTACTATCATTATTCCATGTAGAATAAAACAAATTGTAAACGTGTGGCAAAGAGTAGGGCGAGCAATGTATGCCCCTCCCATTGCAGGAAAAATTCAGTGCAACTCAAATATCACAGGTCTACTATTGACAAGAGATGGTGGAAGTAAGGCAAATAACACAGACATCCTCAGACCTATAGGGGGAGAGATGAGAGACAATTGGAGAAGTGAATTATATAAATATAAGGTAGTACAAATTCAACCACTAGGAATAGCACCCTCCAGGGCAAAAAGACAAGTGGTGAAGAGAGAAAGAAGAGCAGTAGGAATAGGAGCTGTGTTCCTTGGGTTCTTGGGAGCAGCAGGAAGCACTATGGGCGCAGCGTCAATAACGCTGACGGTACAGGCCAGACAATTATTGTCTGGTATAGTGCAACAGCAAAACAATTTGCTGAAGGCTATAGAAGCGCAACAGCATCTGTTGCAGCTCACAGTCTGGGGCATTAAACAGCTCCAGGCGAGAATCCTGGCTGTGGAAAGATACCTAAAGGACCAACAGCTCCTAGGGATTTGGGGCTGCTCTGGAAAGCTCATCTGCACCACTAATGTGCCCTGGAATTCTAGTTGGAGTAATAAATCTCAGGAAGAAATTTGGGGAAACATGACGTGGATGCAGTGGGAAAAAGAGATCGATAATTACACAGACACAATATACAGATTAATAGAGGAGGCGCAAAACCAGCAGGAAAAGAATGAACAGGACTTATTGGCATTGGACAAGTGGGACAGTCTGTGGAGTTGGTTTACTATAACAAACTGGTTGTGGTACATAAGAATATTCATCATGGTAGTAGGAGGCTTGATAGGATTAAGAATAGTTTTTGCTGTGCTTTCTATAATAAATAGGGTTAGGCAGGGTTATTCACCTTTGTCATTACAGACCCTTATCCCAAGCCCGAGGGGACCCGACAGGCCCGGAGGAATCGAAGAAGAAGGTGGAGAGCAAGACAAAGACAGATCCGTGAGATTAGTGAGCGGATTCTTAGCACTTGCCTGGGACGATCTGCGGAGCCTGTGCCTCTTCAGCTACCGCCACTTGAGAGACTTCATATTGATTGCAGCGAGGACAGTGGACAGGGGACTGAAAGGGGGGTGGGAAGTCCTCAAATATCTGTGGAATCTCGCTCAGTATTGGGGTCGGGAACTGAAAATTAGTGCTATTAGTCTGCTTAACACCACAGCAATAGTGGTAGCTGAAGGGACAGATAGAGTCATAGAAATTCTGCAAAGAGCTGGTAGAGCTATTCTCCACATACCTAGAAGAATAAGACAGGGTTTCGAAAGGGCTTTGCTATAAAATGGGTGGCAAGTGGTCAAAAAGTAGTATAGTTGGATGGCCTAAGGTAAGGGAAAGAATGAGACAAACCCCTGTAGCAGCAGAAGGGGTGGGAAAGGTGTCTCAAGACTTAGATAAACATGGGGCAATTACAAGCAGCAATACTGGGGCTACTAATAATGACATAGCCTGGCTGGAAGCGCAAGAAGATGAGGAAGTAGGTTTTCCAGTCAGACCTCAGGTACCTTTAAGACCAATGACTTTCAAGGGAGCTGTCGATCTCAGTCACTTTTTAAAAGAAAAGGGGGGACTGGATGGGTTAATCTACTCCAGGAAAAGACAAGAAATCCTTGATCTATGGGTCTATCACACACAAGGCTACTTCCCTGATTGGCAGAACTACACACCAGGGCCAG
>F2.CM.97.CM53657_AF377956_H.BE.93.VI991_AF190127
GCAAGAGCGTCACTATTAAGCGGGGGAAAATTAGATGATTTGGAAAAAATTCGGTTAAGGCCAGGGGGGAAGAAAAAATATAGGCTGAAACATATAGTATGGGCAAGCAGGGAGCTAGAAAGATTTGCACTTAATCCTGGCCTTTTAGAGACAAAGGAAGGCTGTAAACAAATAATAGGACAACTACAACCATCCCTTCAGACAGGATCAGAAGAGCTTAAATCATTATTCAACACAATAGTAGTCCTCTATTATGTACATCAAAGGATAAAAATAGGAGACACCAAGGAAGCTTTAGATAAGCTACAGGAAGAACAAGACAAAAGTCAGCAAAAAACACAACCAGCAGCGGCTGACAAAGGGGTCAGTCAAAATTACCCTATAGTACAGAATCTTCAGGGACAAATGGTACACCAGTCTCTATCACCTAGAACTTTAAATGCATGGGTAAAAGTAATAGAAGAGAAGGCTTTCAGCCCAGAAGTAATACCCATGTTTTCAGCATTATCAGAAGGAGCCACCCCACAAGATTTAAACACCATGCTAAACACAGTGGGGGGACATCAAGCAGCCATGCAAATGTTAAAAGATACCATCAATGAGGAAGCTGCAGAATGGGACAGATTACATCCAGTGCAGGCAGGACCCATCCCACCAGGTCAGATAAGAGAACCTAGGGGAAGTGATATAGCAGGAACTACTAGCAACCTACAGGAACAAATAGCATGGATGACAAGCAACCCACCTGTCCCAGTAGGAGAAATCTATAAAAGATGGATAATCCTAGGATTAAATAAAATAGTAAGAATGTATAGCCCTGTCAGCATTTTGGACATAAAACAAGGGCCAAAAGAACCCTTTAGAGACTATGTAGACAGGTTCTTTAAAACTCTAAGAGCTGAGCAAGCTTCACAGGAAGTAAAAGGCTGGATGACAGACACCTTGTTGGTCCAAAATGCGAACCCAGATTGTAAGATCATTTTAAAAGGATTAGGAACAGGGGCTACACTAGAAGAAATGATGACAGCATGTCAGGGGGTGGGGGGACCTGGCCATAAGGCAAGAATTTTGGCTGAGGCAATGAGCCAAGTAACATCTACATCCATATTGATGCAGAAAAGCAACTTTAAGGGCCAAAGAAGAAATGTTAAGTGTTTCAACTGTGGCAAAGAAGGACATATAGCTAAAAATTGCAGGGCCCCTAGAAAAAGGGGCTGTTGGAAATGTGGAAAGGAAGGACACCAAATGAAAGACTGCACTGAGAGACAGGCTAATTTTTTAGGGAAAATTTGGCCTTCCAACAAGGGGAGGCCTGGAAATTTTCTTCAGAACAGACCAGAGCCAACAGCCCCGCCAGCAGAAAGCTTCGGGTTCGGAGAAGAGATAACTCCCTCCCCGAAGCAGGAGCAGAAAGACAAGGAAATGTACCCTCCCTTGACTTCCCTCAAATCACTCTTTGGCAACGACCCTTAGTCACAATAAAAGTAGAGGGGCAACTAAGGGAGGCACTATTAGATACAGGGGCAGATGATACAGTATTAGAAGATATAAATTTGTCAGGAAAATGGAAACCAAGGATGATAGGGGGAATTGGAGGTTTTATCAAAGTAAGACAGTATGACCAAATACCCATAGAAATTTGCGGACAAAAGGCTATAGGTACTGTATTAGTAGGACCTACGCCTGTCAACATAATTGGAAGAAATATGTTGACTCAGATTGGTTGCACTTTAAATTTTCCAATTAGTTCTATTGAAACTGTACCAGTAAAATTAAAGCCAGGAATGGATGGCCCAAAGGTTAAACAATGGCCATTGACAGAAGAAAAAATAAAAGCATTAACAGAAATCTGTACAGAGATGGAAAAAGAAGGAAAAATTTCAAAAATTGGGCCAGAAAATCCATACAATACTCCAGTATTTGCCATAAAGAAAAAGGACAGTACTAAATGGAGAAAATTAGTAGATTTCAGAGAACTTAATAAAAGAACTCAAGATTTTTGGGAGGTTCAATTAGGAATACCACACCCTGCAGGGTTAAAAAAGAAAAAATCAGTAACAGTACTAGATGTGGGGGATGCATATTTTTCAGTTCCCTTAGATAAGGAGTTCAGGAAGTACACTGCATTCACCATACCTAGTATCAACAATGAGACGCCAGGAATTAGATATCAGTACAATGTGCTTCCACAGGGATGGAAAGGGTCACCAGCAATATTCCAAAGTAGCATGACAAAAATCTTAGAGCCCTTTAGAGTAAAAAATCCAGAAATAGTTATTTACCAATACATGGATGATTTGTATGTAGGGTCTGACTTAGAAATAGGACAGCATAGGACAAAAATAGAAGAGTTAAGAGAACATCTATTGAGATGGGGATTTACTACACCAGATAAAAAACATCAGAAGGAACCCCCATTTCTTTGGATGGGGTATGAACTCCATCCTGACAAATGGACAGTACAGCCTGTAAAATTGCCAGAAAAAGACAGCTGGACTGTCAATGATATACAGAAGTTAGTGGGAAAACTAAATTGGGCAAGTCAGATTTACCCAGGGATTAGAGTAAAGCACCTATGCAAACTCCTTAGAGGAGCCAAAGCGCTAACAGACGTAGTGCCACTAACAGTAGAAGCAGAATTAGAAATGGCAGAGAACAGGGAAATTCTAAAAGAACCAGTACATGGGGTATATTATGACCCATCAAAAGATCTAATAGCAGAAGTACAGAAACAAGGGCACGACCAATGGACATATCAAATTTATCAAGAGCCACATAAAAATCTGAAAACAGGAAAGTATGCAAGAAGGAGGTCTGCCCACACTAATGATGTAAAACAATTAACAGAAGTAGTGCAAAAAATAGCCACAGAAGGCATAGTAATATGGGGAAAAGTTCCTAAATTTAGGCTACCCATACAAAAAGAAACATGGGAAACATGGTGGACAGAGTATTGGCAGGCCACCTGGATTCCTGAATGGGAGTTTGTCAATACCCCTCCTCTAGTAAAATTATGGTATCAATTAGAAACAGAGCCCATATTAGGAGCAGAAACTTTCTATGTAGATGGGGCAGCTAATAGAGAGACCAAAATAGGAAAAGCAGGATATGTTACTGACAGAGGAAGACAAAAAGTTGTCCCCCTAACTGAGACAACAAATCAGAAGACTGAATTACAAGCAATTCATTTAGCTTTGCAGGACTCAGGATCAGAAGTAAACATAGTAACAGACTCACAGTATGCATTAGGAATCATTCAAGCACACCCAGATAAGAGTGAATCAGAGTTAGTCAACCAAATAATAGAGCAATTAATACAAAAAGAAAGGGTCTACCTGTCATGGGTACCAGCACATAAAGGAATTGGAGGAAATGAACAAGTAGATAAATTAGTCAGTGCTGGCATCAGGAAAGTACTGTTTTTGGATGGGATAGATAAGGCTCAAGAAGAACATGAAAAATATCACAGCAATTGGAGAGCAATGGCTAGTGATTTTAATTTGCCACCTGTAGTAGCCAAAGAAATAGTAGCCAGCTGTGATAAATGTCAGCTAAAAGGGGAAGCCATGCATGGACAAGTAGACTGCAGTCCAGGGATATGGCAACTAGATTGTACACATTTAGAAGGAAAAATTATCTTGGTAGCAGTCCATGTGGCTAGTGGTTATATAGAAGCAGAAGTTATCCCAGCAGAAACGGGACAGGAAACAGCCTACTTCCTACTAAAGTTAGCAGGAAGATGGCCAGTAAAAATAATACATACAGATAATGGCAGCAATTTCACCAGTACTGTGGTTAAGGCAGCCTGTTGGTGGGCAGGTATCCAGCAGGAATTTGGAATTCCCTACAATCCTCAAAGTCAAGGAGTAGTAGAATCTATGAATAAAGAATTAAAGAAAATTATAGGACAGGTAAGAGATCAAGCTGAACATCTTAAGACAGCAGTACAAATGGCAGTATTCATTCACAATTTTAAAAGAAAAGGGGGGATTGGGGGGTACAGTGCAGGGGAAAGAATAATAGACATAATAGCAACAGACATACAAACTAAAGAATTACAAAAACAAATTACAAAAATTCAAAACTTTCGGGTTTATTTCAGGGACAGCAGAGACCCAATTTGGAAAGGACCAGCAAAGCTACTCTGGAAAGGTGAAGGGGCAGTAGTCATACAAGACAATAATGAAATAAAAGTAGTACCAAGAAGAAAAGCAAAAATCATTAGGGATTATGGAAAACAGATGGCAGGTGATGATTGTGTGGCAGGTAGACAGGATGAGGATTAGAACATGGAACAGTTTAGTAAAACATCATATGTATGTTTCAAGGAGAGCTAAAGGATGGTTTTATAGACATCACTATGAAAGCAGGCATCCAAGAGTAAGCTCAGAAGTACACATCCCACTAAAGGATGATTCTAAATTAGTAATAGTAAGCTATTGGGGTCTACATACAGGAGAAAGAGATTGGCATTTGGGTCAAGGAGTCTCCATAGAATGGAGGCAGAAAAGATATAGGACACAAGTAGACCCTGGCTTGGCAGACCAATTAATTCATTTGTATTACTTTGATTGTTTTTCAGAATCTGCCATAAGGAAAGCCATATTAGGACAGAGAGTTAGTCCTAGGTGTAACTATCAAGCAGGACATAACAAGGTAGGATCCCTACAATATTTGGCACTAACAGCATTAATAACCCCAAAGAAGATAAAGCCGCCTTTGCCTAGTGTCAGGAAACTAGTAGAGGATAGATGGAACAACCCCCAGAAGACCAGGGGCCACAGAGGGAGCCACACAATGAATGGACACTAGAGCTTTTAGAGGAGCTTAAGCATGAAGCTGTTAGACATTTCCCTAGGGAGTGGCTCCATGGCTTAGGACAGCATATCTACAACACCTATGGGGATACTTGGGAGGGAGTTCAAGCTATAATAAGAACACTGCAACAACTACTATTTATCCATTTCAGAATTGGGTGTCATCATAGCAGAATAGGCATTATTCGACAAAGAAGACTAAGAAATGGAAATGGTAGATCCTAAACTAGAGCCCTGGAATCATCCAGGAAGTCAGCCTGAGACTCCTTGTAATAAATGTTACTGTAAAAAGTGTTGCTTTCATTGCCAATTGTGCTTTACAAGGAAGGGCTTAGGCATCTCCTATGGCAGGAAGAAGCGGAGACAGCGACGAAGAGCTTCTCAAAGCAGTGAGATACATCAAAATCCTGTACCAAAGCAGTAAGTAGCATATGTAATGTCATCTTTGCTAACAATAGCAATAGTAGCATATATAGTAGCAATACTAATAGCAATAATTGTGTGGACTATAGTGTATATAGAATATAAGAAACTGTTAAGGCAAAAAAGAATAAATAAGTTATATAAAAGAATAAGAGAAAGAGCAGAAGACAGTGGCAATGAGAGTGAGGGAGATGCAGAGGAATTGGCAGCACTTGGGGAAATGGGGCCTTTTATTCCTGGGGATATTAATAATCTGTAATGCTGCAGATAACTTGTGGGTCACAGTCTATTATGGAGTACCTGTGTGGAAAGAAGCAACCACTACTCTATTTTGTGCATCAGATGCTAAAGCATATGAAAGAGAGATACATAATGTCTGGGCTACATATGCCTGTGTACCTACAGACCCCAACCCACAAGAATTAGTTCTGGGAAATGTAACAGAAAATTTTAACATGTGGAAAAATAACATGGTAGACCAGATGCATGAAGATATAATCAGTTTATGGGATCAAAGCCTAAAGCCATGTGTACAGATAACCCCACTCTGTGTAACCTTAAATTGTACTGATGTTCCTGTTAACATCACTAATGGGAACAGCACCCTGGATAACATCACCCTGGAAGAACAAGGGGAAATAAAAAACTGTTCTTTCAATATCACCACAGAGATAAACGATATTAAGAAAAAAGAATCTGCAATTTTTTATAGGCTTGATGTAGTACCAATCAATAATAGTACTAGTGAATATAGGCTACTAAGTTGTAATACCTCAACCGTTACACAGGCTTGTCCAAAGGTGTCCTTTGATCCAATTCCAATACATTATTGTGCTCCTGCTGGTTTTGCGATTCTAAAGTGTAATGATAAAGAGTTCAATGGGACAGGGTTATGTAGGAATGTCAGCACAGTACAATGTACACATGGAATTAAACCAGTAGTGTCAACTCAACTACTGTTAAATGGCAGCCTAGCAGAAGGAGATATAGTAATTAGATCTGAAAATATCTCAGATAATGCAAAAACCATAATAGTACAGTTTAATAGATCTGTAGCAATTAACTGTACAAGACCCACCAACATTACAAGAAGAAGTATGCGTATAGGACCAGGACGAGTATTTTATGCAACAGGTACCGTACTAGGAGATATAAGAAAGGCATATTGTACCATTAATGGAACACTGTGGAATAAAACTTTAGAAGGAGTAGCTAAAGAGGTCCAAAGCCACCTTAATAAATCAATAACATTTGCGCCATCATCAGGAGGGGACCTAGAAGTTACAACACATAGTTTTAATTGTAGAGGAGAGTTTTTCTACTGCAACACAGTAGCTCTGTTTAATGCAACTAACATGACTAATGCAATGAACAGGTCCAATGGCATTATCACTCTTCCATGTAGAATAAGACAAATTGTAAACATGTGGCAAAGAGTAGGACGAGCAATGTATGCCGCTCCCATTGCTGGACAAATTCAGTGTAACTCAAGCATCACAGGTCTAATATTGACAAGAGATGGTGGGAAAAATAATACCAATAATGACACCCTCAGACCTGGAGGGGGAGATATGAGAGACAATTGGAGAAGTGAACTGTATAAATATAAGGTAGTAAAAATTGAACCACTAGGAGTAGCACCCACCAAGGCAAAAAGACAAGTGGTGAAGAGAGAAAGAGAAAAAAGAGCAGTGGGAATAGGAGCTGTGCTCCTTGGGTTCTTGGGAGCAGCAGGAAGCACTATGGGCGCGGCGTCAATGACGCTGACGGTACAGGCCAGACAATTATTGTCTGGTATAGTGCAACAGCAAAACAATTTGCTGAAGGCTATAGAAGCGCAACAGCATCTGTTGCAGCTCACAGTCTGGGGCATTAAACAGCTCCAGGCGAGAATCCTGGCTGTGGAAAGATACCTAAAGGACCAACAGCTCCTAGGGATTTGGGGATGCTCTGGAAAACTCATCTGCACCACTAATGTGCCCTGGAATTCTAGTTGGAGTAATAAATCTCAGAATGAAATTTGGGAGAACATGACCTGGATGCAGTGGGAAAAAGAGATCAGTAATTACACAGGCACAATATACAAATTAATAGAAAATGCACAAAACCAGCAGGAAAAGAATGAACAGGACTTATTGGCATTGGACAAATGGGACAATCTGTGGAGTTGGTTTACTATAACAAATTGGTTGTGGTACATAAAATTATTCATAATGATAGTAGGAGGCTTGATAGGATTAAGAATAGTTTTTGCTGTGCTTGCTGTAATAAATAGGGTTAGGCAGGGATACTCACCTTTGTCGTTACAGACCCTTACCCCAAGCCGGAGGGAACCCGAACGGCCCGGAGGAATCGAAGAAGAAGGTGGAGAGCAAGACAAAACCAGATCCGTCAGATTAGTGAGCGGATTCTTAGCACTTGCCTGGGACGACCTACGGAGCCTGTGCCTCTTCAGCTACCGCCACTTGAGAGACTTCATATTAATTGCAGCGAGGACTGTGAACAAGGGACTAATAAGGGGGTGGGAAATCCTCAAATATCTGGGGAATCTCGCGCAGTATTGGGGCCGGGAAATAAAGAATAGTGCTATTGATCTGCTTAATACCACAGCAATAGTGGTAGCTGAAGGGACAGATAGAATCATAGAAGTTCTGCAAAGAGCTGGTAGAGCTATTCTCCACATACCTAGAAGAATAAGACAGGGTGCAGAAAGGGCTTTGCTATAAAATGGGTGGCAAGTGGTCAAAAAGTAGTAAAGTTGGATGGCCTACTATAAGGGAAAGAATAAGACAAACCCCTGCAGCAGCACCAGGGGTGGGAGCAGTGTCTCAAGACTTAGATAAACATGGGGCAATTACAAGCAGCCAGACTAGGGATACTAATAGTGACTTGGCATGGCTAGAAGCGCAAGAGGATGAGGAGGTAGGTTTCCCAGTCAGACCTCAGGTACCTTTAAGACCAATGACTTATAAGGGAGCTTTCGATCTCAGTTTCTTTTTAAAAGAAAAGGGGGGACTGGAAGGGTTAATTTACTCCAAGAGAAGACAAGAAATCCTTGATCTGTGGGTCTACCACACACAAGGCTACTTCCCTGATTGGCAGAACTACACACCAGGGCCAGGGACTAGATATCCACTGACCTTTGGATGGTGCTTCAAGCTAGTACCAGTTGAGCCAGAGGAGGTAGAAAAGGCCAATGAAGGAGAGAACAACTGTTTATTGCACCCTATGAGCCAACATGGAATGGAGGACGAAGACAGGGAAGTGTTAAAGTGGAAGTTTGACAGCTCCCTAGCACGGAGACACAGAGCCAGAGAGATGCATCCGGAGTACTACAAAGACTGAGAAACTGCTGATACAGAAGATTCTAAAAGGGACTTTCCGCTGGGGACTTTCCAGAGGGCGTTCCAGAGGGCGGGACCGGGGAGTGGCTAACCCTCAGATGCTGCACATAAGCAGCTGCTTTGCGCCTGTACTGGGTCTCTCTGGCTAGACCAGATTTGAGCCTGGGAGCTCTCTGGCTAGCTAGGGAACCCACTGCT
>F2.CM.95.MP257_AJ249237_J.SE.94.SE7022_AF082395
AATGGGTGCGAGAGCGTCAGTATTAAGCGGGGGAAAATTAGATGCATGGGAAAAAATTCGGTTAAGGCCGGGGGGGAAGAAAAAATATAGGCTGAAACATATAGTATGGGCAAGCAGGGAGCTAAAACGATTTGCACTTAATCCTGGCCTTTTAGAGACAACAGAAGGCTGTAAGAAAATAATAGGACAACTACAACCATCCCTTCAGACAGGGTCAGAGGAACTGAAATCATTATTTAACACAATAGTAGTTCTCTATTATGTACATCAAAAGATAGAGGTAAGAGACACCAAGGAAGCTTTAGATAAGCTACAGGAAGAACAAGACAAACATCAGCAAAAAACACAACAAGCAACGGCTGACAAAGGGGTCAGTAAAGGGGTCAGTCAAAATTACCCTATACTACAAAATCTTCAGGGGCAAATGGTACACCAGAGTCTATCACCTAGAACTTTAAATGCATGGGTAAAAGTAATAGAAGAGAAGGCTTTCAGCCCAGAAGTAATACCCATGTTTTCAGCATTATCAGAAGGGGCCACCCCACAAGATTTAAACACCATGCTAAACACAGTGGGGGGACATCAAGCAGCCATGCAAATGTTAAAAGATACCATCAATGAGGAAGCTGCAGAATGGGACAGGTTACATCCAGTGCATGCAGGACCTATCCCACCAGGTCAGATGAGAGAACCAAGGGGAAGTGATATAGCAGGAACCACTAGTACCCTTCAGGAACAAATAGCATGGATGACAAGCAACCCACCTGTCCCAGTAGGAGAAATCTATAAAAGATGGATAATCCTAGGATTAAATAAAATAGTAAGAATGTATAGCCCTGTCAGCATTTTGGACATAAAACAAGGGCCAAAAGAACCCTTTAGAGACTATGTAGACAGGTTCTTTAAAACTCTAAGAGCTGAGCAAGCCACGCAGGAAGTAAAAGGCTGGATGACAGAAACCTTGTTGGTCCAAAATGCGAACCCAGATTGTAAGACCATTTTAAAAGCATTGGGGCCAGGGGCTACACTAGAAGAAATGATGACAGCATGTCAGGGTGTGGGAGGACCTAGCCATAAAGCAAGAATTTTGGCTGAGGCAATGAGCAAAGCAACAGGTGCAAACATAATGATGCAAAGAGGTAACTTTAGGGATCATAAAAGAATTGTTAAGTGTTTCAATTGTGGCAAACAAGGACACATAGCAAAAAACTGCAGGGCCCCTAGAAAAAGGGGCTGCTGGAAATGTGGACAGGAAGGACACCAAATGAAAGACTGCACTGAGAGACAGGCTAATTTTTTAGGGAAAATGTGGCCTTCCAACAAGGGGAGGCCCGGAAATTTTCTTCAGAACAGACCAGAGCCAACAGCCCCGCCAGCAGAGAGCTTCGGGTTCGGGGAGGAGATAGCTCCCTCCCCGAAGCAGGAGCAGAAAGACAAGGAACAGGTTCCTCCCTTGATTTCCCTCAAATCACTCTTTGGCAGCGACCAGTAGTCACAATAAAAGTAGGAGGGCAACTAAGGGAGGCTCTATTAGATACAGGGGCAGATGATACAGTATTAGAAGATATAAATTTGCCAGGAAAATGGAAACCAAAAATGATAGGGGGAATAGGGGGTTTTATCAAAGTAAGACAGTATGATCAAGTATCCATAGAAATTTGTGGACAAAAAGCTATAGGTACAGTATTAGTAGGGCCTACGCCTGTCAACATAATTGGAAGAAATATGTTGACTCAGATTGGTTGCACTCTAAATTTTCCAATAAGTCCTATTGAAACTGTACCAGTAAAATTAAAGCCAGGAATGGATGGCCCAAAGGTTAAACAATGGCCATTGACAGAAGAAAAAATAAAAGCACTAACAGAAATCTGTACAGAGATGGAGAAAGAAGGAAAAATTTCAAAAATTGGGCCAGAAAATCCATACAATACTCCAGTATTTGCCATAAAAAAGAAGGACAGTACTAAATGGAGAAAATTAGTAGATTTCAGAGAGCTTAATAAAAGAACTCAAGATTTTTGGGAGGTTCAATTAGGAATACCACACCCTGCAGGGTTAAAAAAGAAAAGATCAGTAACAGTACTGGATGTGGGGGATGCATATTTTTCAGTTCCCTTAGATAAAGAGTTCAGGAAGTACACTGCGTTCACCATACCTAGTATCAACAATGAGACACCAGGAATTAGATATCAGTACAATGTGCTTCCACAGGGATGGAAAGGGTCACCAGCAATATTCCAAAGTAGCATGATAAAAATCTTAGAGCCCTTTAGAAAAGAAAATCCAGAAATAGTTATCTACCAATATATGGATGATCTGTATGTAGGGTCTGACTTAGAAATAGGGCAGCATAGGGCAAAAATAGAGGAGTTAAGGGAACATCTATTGAGATGGGGATTTACTACACCAGATAAAAAACATCAGAAAGAACCCCCATTTCTTTGGATGGGGTATGAACTCCATCCTGATAAATGGACAGTACAGGCTATACAATTGCCAGACAAGAGCAGCTGGACTGTCAATGATATACAGAAGTTAGTGGGAAAACTAAATTGGGCAAGTCAGATTTATCCAGGGATTAGAGTAAAGCACTTATGTAAACTCCTTAGGGGAACCAAAGCACTAACAGATGTAGTGCCTCTAACTGCAGAAGCAGAGTTAGAACTGGCAGAGAACAGGGAAATTCTAAAAGAACCAGTACATGGGGTATATTATGACCCATCAAAAGATTTAATAGCAGAAATACAGAAACAAGGACACGACCAATGGACATATCAAATCTATCAAGAGCCACATAAAAATCTGAAAACAGGAAAGTATGCAAGAAGGAAGTCTGCCCACACTAATGATGTAAAGCAATTAACAGAAGTAGTGCAAAAAGTAGCCACAGAAGGCATAGTAATATGGGGAAAAGTTCCTAAATTTAGACTACCCATACAAAAGGAAACATGGGAAATATGGTGGACGGAGTATTGGCAAGCTACCTGGATTCCTGAATGGGAGTTTGTCAATACCCCTCCTCTAGTAAAATTATGGTACCAGTTAGAAACAGAACCTATAATAGGAGCAGAAACTTTCTATGTAGATGGGGCAGCTAATAGAGAGACTAAACTAGGAAAAGCAGGATATATTACTGACAGAGGAAGACAAAAGGTTGTCTCCCTAACTGAGACAACAAATCAGAAGACTGAATTACAAGCAATTCAGTTAGCCTTGCAGGATTCAGGATCAGAAGTAAACATAGTAACAGACTCACAGTATGCATTAGGAATCATTCAAGCACACCCAGATAAGAGTGAATCAGAGATAGTCAACCAAATAATAGAGCAATTAATACAAAAGGAAAGGGTCTACCTGTCATGGGTACCAGCACATAAAGGGATTGGAGGAAATGAACAAGTAGATAAATTAGTCAGTACTGGAATCAGGAAAGTACTGTTTTTGGATGGGATAGATAAAGCTCAAGAAGAGCATGAGAAATATCACAGCAATTGGAGAGCAATGGCTAGTGATTTTAACCTGCCACCTGTAGTAGCAAAAGAAATAGTAGCCAGCTGTGATAAATGTCAGCTAAAAGGGGAAGCCATGCATGGACAAGTAGACTGCAGTCCAGGGATATGGCAATTAGATTGTACACATTTAGAAGGAAAAATTATCCTAGTAGCAGTCCATGTAGCTAGTGGCTATATAGAAGCAGAAGTTATTCCAGCAGAAACAGGACAGGAAGCAGCCTACTTCATACTAAAGTTAGCAGGAAGATGGCCAGTAAAAATAATACATACAGACAATGGCAGCAATTTTACCAGTGCTGTGGTTAAGGCAGCCTGTTGGTGGGCAGGTATCCAGCAGGAATTTGGAATTCCCTACAATCCCCAAAGTCAAGGAGTAGTAGAATCTATGAATAAAGAATTAAAGAAAATCATAGGACAAGTAAGAGATCAAGCTGAACATCTTAAGACAGCAGTGCAAATGGCAGTATTCATTCACAATTTTAAAAGAAAAGGGGGGATTGGGGGGTACAGTGCAGGGGAAAGAATAATAGACATAATAGCAACAGACATACAAACTAAAGAATTACAAAAACAAATTTCAAAAATTCAAAATTTTCGGGTTTATTTCAGGGACAGCAGAGACCCAGTTTGGAAAGGACCAGCAAAACTACTCTGGAAAGGTGAAGGGGCAGTAGTCATACAAGACAATAATGAAATAAAAGTAATACCAAGAAGAAAAGCAAAGATCATTAGGGATTATGGAAAACAGATGGCAGGTGATGATTGTGTGGCAGGTAGACAGGATGAAGATTAGAACATGGAACAGCTTAGTAAAACACCATATGTATATTTCAAAGAGAGCTGCAGGATGGTTTTATAGACATCACTATGAAAGCAGGCATCCAAGAGTAAGTTCAGAAGTACACATTCCACTAGAGGAAGATTCTAAATTAGTCATAATAACCTATTGGGGTCTACATACAGGAGAAAGAGACTGGCATTTGGGTCAAGGAGTCTCCATAGAATGGAGACAGAAAAGGTATAGGACACAAGTAGACCCTGGCTTGGCAGACCAACTAATTCATCTGCATTATTTTGATTGTTTTTCAGACTCTGCCATAAGGAAAGCCATATTAGGACAGAGAGTTAGCCCTAGGTGTAATTATCAAGCAGGACATAACAAGGTAGGATCCCTACAATATTTGGCACTAACAGCATTAATAACTCCAAAAAAGATAAAGCCGCCTTTACCTAGTGTCAGGAAACTAGTAGAGGATAGATGGAACAACCCCCAGAAGACCAGGGGCCACAGAGGGAGCCATACAATGAATGGACACTAGAGCTTCTAGAGGAGCTTAAGCATGAAGCTGTTAGACATTTTCCTAGGGAGTGGCTCCATGGCTTAGGACAGCATATCTATAACACCTATGGGGATACTTGGGAGGGAGTTGAAGCTATAATAAGGATACTGCAACAACTACTATTTATCCATTTCAGAATTGGGTGCCATCATAGCAGAATAGGCATTATTCGACAAAGAAGAATAAGAAATGGAAGTGGTAGATCCTAACCTAGATCCCTGGAAACATCCAGGGAGTCAGCCTGAGACTCCGTGTAATAAATGCTATTGTAAAAAGTGTTGCTTTCATTGCCAACTGTGCTTTACAAGGAAGGGCTTAGGCATCTCCTATGGCAGGAAGAAGCGGAGACAGAGACGAAGAACTCCTCAAAGCGGTGAGGTACATCAAGATCCTGTATCAAAGCAGTAAGTAGTACATGTAATGTCACTTTCGCTAATAGTAGTAATAGCAGCATATATAGTAGTGCTAATACTAGCAATAATTGTGTGGACTATAGTATATATAGAATATAAGAAAATATTAAGGCAAAAAAGAATAAATAGGTTATATGAAAGAATAATAGAGAGAGCAGAAGACAGTGGAAATGAGAGTGAGGGAGATGCAGAGGAATTGGCAGCACTTGGGGAGGTGGGGCCTCTTATTCCTGGGGATATTAATAATCTGTAGTGCTGCAGATAAGTTGTGGGTCACAGTCTATTATGGAGTACCTGTGTGGAAAGAAGCAACCACTACTCTATTTTGTGCATCAGATGCTAAAGCATATGAAAGAGAGGTACATAATGTCTGGGCTACATATGCCTGTGTACCTACAGACCCAAGCCCACAAGAATTGGTTCTTGGAAATGTATCAGAAAAATTTAACATGTGGAAAAATAACATGGTAGACCAAATGCATGAAGATATAATCAGTTTATGGGATGAGAGCCTAAAGCCATGTGTAAAGTTAACCCCACTCTGTGTTACTTTAAATTGTACTAAGGCTATCATTAATGTCACCTCTTCTAATAATACCACCTTGGCTCCTAATGTTACCATCTCGGAGGAAATGAAAAACTGTTCTTTCAATATAACCACAGAGATAAGAGATAAGCAGAAAAAAGAATATGCACTTTTTTATAAACTTGATGTAGTACAAATCAATAACAGTAATACTAGTTATAGGCTAATAAATTGTAATACCTCAACCCTTACACAGGCTTGTCCCAAGGTGTCCTTTGACCCAATTCCCATACATTATTGTGCTCCTGCTGGCTTTGCGATTCTAAAGTGTAATAATAAAACATTCAATGGGACAGGATTATGCAGGAATGTTAGCACAGTACAATGTACACATGGAATTAAACCAGTGGTATCAACTCAACTACTGTTAAATGGCAGCCTAGCAGAAGAAAAGATGATAATTAGATCTGAAAATATCTCAGATAATACAAAAACCATAATAGTACAGTTTAAAAATCCTGTAAAAATTAATTGTACAAGACCCAACAACAATACAAGAAGAAGTATACATATAGGACCAGGACGAGCATTCTATGCAACAGGTGAGATAATAGGAGATACAAGAAAGGCACATTGTAACATTAGTGAAAAACAGTGGTATGACACTTTAATAAAGATAGCTACAGAGTTCAAAGACCAATATAATAAAACAGTAGGGTTTCAACCATCAGCAGGAGGGGATCTAGAAATTACAACACATAGTTTTAATTGTAGAGGAGAATTTTTCTACTGCAACACAACTATTCTGTTTAATCACACAAGAGTAAATGACATTCTGTCTAATAATCACACGAGAGAAAATGACACTATCACTCTTCCATGTAGAATAAAACAAATTGTAAACATGTGGCAAAGAGTAGGACAGGCAATGTATGCCCCTCCCATTGCCGGAAAAATTCAGTGTAACTCAAATATCACAGGTCTACTATTAACAATAGATGGTGGGGAGGGAAATGAGTCCGAGACCCTCAGACCTGGAGGGGGAGATATGAGAGACAATTGGAGAAGTGAACTATATAAATATAAGGTAGTAAAAATTGAACCACTAGGAGTAGCACCCACCAAGGCAAAAAGACAAGTGGTGCAGAGAGAAAAAAGAGCAGTGGGAATGGGAGCTATGTTCCTTGGGTTCTTGGGAGCAGCCGGAAGCACTATGGGCGCGGCGTCAATAACGCTGACGGTACAGGCCAGAAACTTATTGTCTGGTATAGTGCAGCAGCAAAGCAATTTGCTGAAAGCTATTGAAGCGCAACAGCATCTGTTGCAGCTCACAGTCTGGGGCATTAAACAGCTCCAGGCGAGAATCCTGGCTGTGGAAAGATACCTAAAGGACCAACAGCTCCTAGGGATTTGGGGCTGCTCTGGAAAACTCATCTGCCCAACTACTGTGCCTTGGAATCTTAGTTGGAGTAATAAATCTCAAGATGAAATTTGGGGAAACATGACATGGATGGAATGGGAAAAGGAGATTGGCAATTACACAGACACAATATACAGATTAATTGAAAGTGCACAAAATCAGCAGGAAAAGAATGAACAGGACTTATTGGCATTGGACAAGTGGGACAATCTGTGGAATTGGTTTTCTATAACAAGATGGTTGTGGTACATAGAAATATTCATAATGATAATAGGAAGCTTGATAGGATTAAGAATAGTTTTTACTGTGCTTTCTATAATAAATAGAGTTAGGCAGGGATACTCACCTTTGTCATTGCAGACCCTTATCCCAAACTCGAGGGGACCCGAAAGGCCCGGAGGAATCGAAGAAGAAGGTGGAGAGCAAGACAAAGACAGATCCATCAGATTAGTGAGCGGATTCTTAGCACTTGCCTGGGACGACTTCAGGAGCCTGTGCGTCTTCAGCTACCACTGCTTGAGAAACTTCATATTAATTGCAGCGAGGACTGTGGACAAGGGACTGAAAAGGGGGTGGGAAGTCCTCAAATATCTGTGGAATCTCGCGCAGTATTGGGGTCAGGAACTAAAGAATAGTGCTATTAGTCTGTTGGATAGAACAGCAATAGCAGTAGCTGAAGGAACAGATAGAATCATAGAAATTTTGCAAAGAGCTGGTAGAGCTGTTCTCAACATACCTAGAAGAATAAGACAGGGTCTTGAAAGAGCTTTGCTATAAAATGGGTGGCAAGTGGTCAAAAAGTAGTATAGTTGGATGGCCTGCTATAAGGGAAAGAATAAGAGCAGCAGAAGGGGTAGGAGCAGTGTCTCAAGACTTAGATAAACGTGGGGCAATTACAAACAGCAATACTGGGGCTACTAATGCTGACTTGGCCTGGCTAGAAGCGCAAGAGGAGGAAGTAGGTTTTCCAGTCAGACCTCAGGTACCTTTAAGACCAATGACTTATAAGGCAGCCCTGGATCTCAGTCACTTTTTAAAAGAAAAGGGGGGACTGGAAGGGTTAATTTACTCCAGGAAAAGACAAGAAATTCTTGATTTGTGGGTCTACCACACACAAGGCTACTTCCCTGATTGGCAGAACTACACACCAGGGCCAGGGCCCAGATTTCCACTGACCTTTGGATGGTGCTTCAAGCTAGTACCAGTTGATCCAGAGGAGGTAGAAAAGGCCAATGAAGGAGAGAACAACTGTTTGTTACACCCTATGAGCCTACATGGAATGGAGGATGACGACAAGGAAGTGTTAAAGTGGCAGTTTGACAGCCGCCTAGCGCTGAGACATATAGCCAGAGAGAGACATCCGGAGTACTACAAAGAC
>F2.CM.95.MP257_AJ249237_K.CM.96.MP535_AJ249239
[truncated: 63,047 more chars]
