# Supplementary material for: More accurate recombination prediction in HIV-1 using a robust decoding algorithm for HMMs
Source: BMC Bioinformatics. 2011 May 17;12:168. doi: 10.1186/1471-2105-12-168 (PMC3123234; doi:10.1186/1471-2105-12-168)
Supplement: Additional file 1 — Data sets. This file contains sequences and their annotations for the single-breakpoint and short interval data sets. [file 1471-2105-12-168-S1.GZ › datasets/short_100_annotations.txt]

>A1.KE.97.ML013_2_AY322185_A2.CY.94.94CY017_41_AF286237
1	784	A1
785	884	A2
885	9082	A1

>A1.KE.00.KER2012_AF457055_B.NL.96.H434_42_A1_AY970948
1	6803	A1
6804	6903	B
6904	8804	A1

>A1.UG.92.92UG_029_AY713407_C.BW.99.99BWMC168_AF443087
1	6231	A1
6232	6331	C
6332	8245	A1

>A1.UG.85.U455_M62320_D.UG.99.99UGA07412_AF484477
1	5699	A1
5700	5799	D
5800	9181	A1

>A1.UG.x.UG031_AB098331_F1.BE.93.VI850_AF077336
1	8043	A1
8044	8143	F1
8144	9616	A1

>A1.UZ.02.02UZ0659_AY829209_F2.CM.95.MP257_AJ249237
1	1884	A1
1885	1984	F2
1985	8818	A1

>A1.UZ.02.02UZ694_AY829205_G.ES.00.X558_AF423760
1	2014	A1
2015	2114	G
2115	8825	A1

>A1.KE.99.KNH1135_AF457065_H.BE.93.VI991_AF190127
1	1167	A1
1168	1267	H
1268	8825	A1

>A1.KE.97.ML013_2_AY322185_J.SE.93.SE7887_AF082394
1	5640	A1
5641	5740	J
5741	9082	A1

>A1.UG.99.99UGG03379_AF484493_K.CM.96.MP535_AJ249239
1	372	A1
373	472	K
473	8826	A1

>A2.CD.97.97CDKFE4_AF286240_B.DE.86.D31_U43096
1	4411	A2
4412	4511	B
4512	5100	A2

>A2.CD.97.97CDKFE4_AF286240_C.ZA.04.04ZASK182B1_AY878054
1	2807	A2
2808	2907	C
2908	5100	A2

>A2.CD.97.97CDKS10_AF286241_D.UG.92.92UG001_AJ320484
1	937	A2
938	1037	D
1038	5323	A2

>A2.CD.97.97CDKFE4_AF286240_F1.BR.89.BZ163_AY173958
1	903	A2
904	1003	F1
1004	5100	A2

>A2.CD.97.97CDKFE4_AF286240_F2.CM.97.CM53657_AF377956
1	157	A2
158	257	F2
258	5100	A2

>A2.CD.97.97CDKS10_AF286241_G.KE.93.HH8793_12_1_AF061641
1	4841	A2
4842	4941	G
4942	5323	A2

>A2.CD.97.97CDKS10_AF286241_H.BE.93.VI991_AF190127
1	554	A2
555	654	H
655	5323	A2

>A2.CD.97.97CDKS10_AF286241_J.SE.94.SE7022_AF082395
1	2355	A2
2356	2455	J
2456	5326	A2

>A2.CD.97.97CDKFE4_AF286240_K.CD.97.EQTB11C_AJ249235
1	3172	A2
3173	3272	K
3273	5100	A2

>B.US.98.98USHVTN1925c1_AY560107_C.ZA.00.1184MB_AY838566
1	7728	B
7729	7828	C
7829	8934	B

>B.UY.01.01UYTRA1179_AY781127_D.ZA.86.R482_AY773341
1	5268	B
5269	5368	D
5369	8245	B

>B.FR.92.92FR_BX08_AY713411_F1.BE.93.VI850_AF077336
1	5142	B
5143	5242	F1
5243	8150	B

>B.NL.86.H434_8_F4_AY970947_F2.CM.97.CM53657_AF377956
1	8647	B
8648	8747	F2
8748	8908	B

>B.BO.99.BOL0122_AY037270_G.CM.96.96CMABB55_AY772535
1	3949	B
3950	4049	G
4050	8829	B

>B.NL.96.H434_42_A1_AY970948_H.BE.93.VI997_AF190128
1	4126	B
4127	4226	H
4227	8967	B

>B.CO.01.PCM034_AY561238_J.SE.93.SE7887_AF082394
1	3464	B
3465	3564	J
3565	8809	B

>B.US.98.1058_11_AY331295_K.CM.96.MP535_AJ249239
1	1679	B
1680	1779	K
1780	8834	B

>C.ZA.04.04ZASK128B1_DQ093586_D.UG.93.93UG_065_AY713418
1	1658	C
1659	1758	D
1759	8442	C

>C.ZA.03.03ZASK026B2_DQ011165_F1.FR.96.MP411_AJ249238
1	5716	C
5717	5816	F1
5817	8458	C

>C.IN.98.98IN022_AF286232_F2.CM.95.MP255_AJ249236
1	5634	C
5635	5734	F2
5735	8980	C

>C.IL.99.99ET1_AY255823_G.CM.96.96CMABB55_AY772535
1	5272	C
5273	5372	G
5373	8799	C

>C.ZA.98.CTSC2_AY043176_H.CF.90.056_AF005496
1	3757	C
3758	3857	H
3858	8746	C

>C.ZA.04.SK140B1_AY901973_J.SE.93.SE7887_AF082394
1	5221	C
5222	5321	J
5322	8407	C

>C.ZA.03.03ZAPS088MB1_DQ275651_K.CM.96.MP535_AJ249239
1	4263	C
4264	4363	K
4364	8410	C

>D.UG.92.92UG001_AJ320484_F1.FR.96.MP411_AJ249238
1	1663	D
1664	1763	F1
1764	9745	D

>D.UG.99.99UGG35093_AF484495_F2.CM.97.CM53657_AF377956
1	5274	D
5275	5374	F2
5375	8807	D

>D.ZA.84.R2_AY773338_G.ES.00.X558_AF423760
1	2111	D
2112	2211	G
2212	8700	D

>D.CM.01.01CM_4412HAL_AY371157_H.CF.90.056_AF005496
1	619	D
620	719	H
720	8379	D

>D.KR.04.04KBH8_DQ054367_J.SE.93.SE7887_AF082394
1	4118	D
4119	4218	J
4219	8885	D

>D.UG.99.99UGA07412_AF484477_K.CM.96.MP535_AJ249239
1	2289	D
2290	2389	K
2390	8794	D

>F1.FR.96.MP411_AJ249238_F2.CM.02.02CM_0016BBY_AY371158
1	6384	F1
6385	6484	F2
6485	8614	F1

>F1.FR.96.MP411_AJ249238_G.NG.01.01NGPL0674_DQ168575
1	6280	F1
6281	6380	G
6381	8614	F1

>F1.FI.93.FIN9363_AF075703_H.BE.93.VI991_AF190127
1	790	F1
791	890	H
891	8925	F1

>F1.BR.89.BZ163_AY173958_J.SE.93.SE7887_AF082394
1	1816	F1
1817	1916	J
1917	8991	F1

>F1.BR.89.BZ126_AY173957_K.CM.96.MP535_AJ249239
1	2879	F1
2880	2979	K
2980	9030	F1

>F2.CM.02.02CM_0016BBY_AY371158_G.ES.00.X558_AF423760
1	1723	F2
1724	1823	G
1824	8349	F2

>F2.CM.97.CM53657_AF377956_H.BE.93.VI991_AF190127
1	2454	F2
2455	2554	H
2555	8782	F2

>F2.CM.95.MP257_AJ249237_J.SE.94.SE7022_AF082395
1	1120	F2
1121	1220	J
1221	8589	F2

>F2.CM.95.MP257_AJ249237_K.CM.96.MP535_AJ249239
1	4171	F2
4172	4271	K
4272	8589	F2

>G.BE.96.DRCBL_AF084936_H.CF.90.056_AF005496
1	8121	G
8122	8221	H
8222	9705	G

>G.CM.96.96CMABB55_AY772535_J.SE.94.SE7022_AF082395
1	5093	G
5094	5193	J
5194	8522	G

>G.SE.93.SE6165_AF061642_K.CD.97.EQTB11C_AJ249235
1	4102	G
4103	4202	K
4203	9074	G

>H.CF.90.056_AF005496_J.SE.94.SE7022_AF082395
1	1023	H
1024	1123	J
1124	8953	H

>H.CF.90.056_AF005496_K.CD.97.EQTB11C_AJ249235
1	6494	H
6495	6594	K
6595	8953	H

>J.SE.94.SE7022_AF082395_K.CD.97.EQTB11C_AJ249235
1	4121	J
4122	4221	K
4222	8953	J
