# Supplementary material for: More accurate recombination prediction in HIV-1 using a robust decoding algorithm for HMMs
Source: BMC Bioinformatics. 2011 May 17;12:168. doi: 10.1186/1471-2105-12-168 (PMC3123234; doi:10.1186/1471-2105-12-168)
Supplement: Additional file 1 — Data sets. This file contains sequences and their annotations for the single-breakpoint and short interval data sets. [file 1471-2105-12-168-S1.GZ › datasets/short_150.fas]

>A1.UG.98.98UG57136_AF484509_A2.CD.97.97CDKS10_AF286241
GCGAGAGCGTCAGTATTAAGTGGGGGAAAATTAGATGCGTGGGAGAAAATTCGGTTAAGGCCAGGGGGAAGGAAACAATATAAACTAAAACATCTAGTATGGGCAAGCAGGGAGCTGGACAGATTCGCACTTAACCCCAGCCTTTTAGAAACAGCAGAAGGATGTCAACAAGTAATAGAACAACTACAACCAGCTTTCAAGACAGGAACAGAAGAACTTAAATCATTATATAATACAGTAGCAACCCTCTATTGCGTACATCAAAGGATAGATGTAAAAGACACCAAGGAAGCTTTAGATAAAATAGAGGAACTACAAAATAAAAGCAAGCAAAAGACACAACAGGCAACAGCTGACACAGGAAACAGTAGCAAGGTCAGCCAAAATTACCCTATAGTGCAAAATGCACAAGGGCAAATGATACACCAGGCTATAACACCAAGAACTTTGAATGCATGGGTGAAAGTAATAGAAGAAAGGGGTTTCAGTCCAGAAGTGATACCCATGTTCTCAGCATTATCAGAAGGAGCCACCCCAGGAGATTTAAATATGATGCTGAACATGGTGGGGGGACACCAGGCAGCTATGCAAATGTTAAAAGATACCATCAATGAGGAAGCTGCAGAATGGGATAGGTTACATCCAGTACAAGCAGGGCCTATTCCACCAGGCCAGATGAGAGAACCAAGGGGAAGTGACATAGCAGGAACTACTAGTACTCCTCAAGAACAAATAGGATGGATGACAGGCAACCCGCCTATCCCAGTGGGAGACATCTATAAAAGATGGATAATCCTGGGATTAAATAAAATAGTAAGAATGTATAGCCCTGTTAGCATTTTGGACATAAAACAAGGGCCAAAAGAACCTTTCAGAGATTATGTAGATCGGTTCTTTAAATGTCTCAGAGCCGAACAAGCTACACAGGATGTAAAAAATTGGATGACAGACACCTTGCTGGTCCAAAATGCAAATCCAGATTGTAAGTCCATTTTAAGAGCATTAGGATCAGGGGCTACATTAGAAGAGATGATGACAGCATGCCAGGGAGTGGGAGGACCCAGCCATAAAGCAAGGGTTTTAGCTGAGGCAATGAGTCAAGTACAAAATGCAGGGGCAAGCATAATGATGCAGAGAGGCAATTTTAGGGGCCAGAAAAGAATTAAGTGTTTCAACTGTGGCAAAGAAGGACACCTAGCCAGAAATTGCAGGGCCCCTAGGAAAAAAGGCTGTTGGAAATGTGGGAAAGAAGGACACCAAATGAAAGACTGCACTGAGAGACAGGCTAATTTTTTAGGGAAAATTTGGCCTCCCAGCAAGGGGAGGCCAGGAAATTTTCCTCAGAACAGACTGGAGCCGACAGCCCCACCAGCAGAGCTGTTTGGGATGGGGGAAGAGATAACCTCCCCTCCGAAGCAGGAGCAGAAAGACAGGGAGCAGAACTCACCCTTAGTTTCCCTCAAATCACTCTTTGGCAACGACCCGTTGTCACAGTAAAAATAGAAGGACAGCTAAAAGAAGCTCTATTAGATACAGGAGCAGATGATACAGTATTAGAAGATATAAATTTGCCAGGAAAATGGAAACCAAAAATGATAGGGGGAATTGGAGGTTTCACTAAGGTAAAACAGTATGATCAGATAGCTATAGAAATTTGTGGAAAAAAGGCTATAGGTACAGTATTAGTAGGACCTACACCTGTCGACATAATTGGAAGAAATATGTTGACTCAGATTGGTTGTACTTTAAATTTTCCAATTAGTCCTATTGAGACTGTACCAGTAACATTAAAGCCAGGAATGGATGGCCCAAGGATTAAACAATGGCCATTGACAGAAGAAAAAATAAAAGCATTAACAGAAATTTGTAAAGAGATGGAAAAGGAAGGAAAAATTTCAAAAATTGGGCCTGAAAATCCATATAATACTCCAATATTTGCTATAAAGAAAAAAGATAGCACTAAATGGAGAAAATTAGTAGATTTTAGAGAACTCAATAAAAGAACTCAGGATTTCTGGGAAGTTCAATTAGGAATACCGCATCCCGCAGGTTTAAAAAAGAAAAAATCAGTAACAGTACTAGATGTGGGAGACGCATATTTTTCAGTTCCTTTAGATGAGAGCTTTAGAAAGTATACAGCGTCCACCATACCTAGTATAAACAATGAGACACCAGGAATCAGGTATCAGTACAATGTGCTTCCACAGGGATGGAAAGGATCACCAGCAATATTCCAGAGTAGCATGACAAAAATCTTAGAACCCTTTAGAGCACAAAATCCAGGAGTAGTTATCTATCAATACATGGATGACTTGTATGTAGGATCTGATTTAGAAATAGGACAGCATAGAGCAAAAGTAGAGGAGTTGAGAGCTCATCTATTGAGGTGGGGATTTACTACACCAGACAAAAAGCATCAGAAAGAACCCCCATTTCTTTGGATGGGATATGAACTCCATCCTGACAAGTGGACAGTTCAGCCTATACAGCTGCCAAACAAAGATAGCTGGACTGTCAATGATATACAGAAATTAGTGGGAAAGCTAAATTGGGCAAGTCAAATTTATGCAGGGATTAAAGTAAAGCAACTGTGTAAACTCCTCAGAGGAGCCAAAGCACTAACAGATATAGTAACATTGACAGAGGAAGCAGAACTAGAATTGGCAGAGAACAGGGAGATTCTAAAAGACCCTGTGCATGGGGTATATTATGACCCATCAAAAGATTTAATAGCAGAAATACAGAAACAAGGGCAAGACCAATGGACATATCAAATTTATCAAGAACCATTTAAGAATCTGAAAACAGGGAAATATGCAAGAAAAAAGTCTGCTCACACTAATGATGTAAAACAATTAGCAGAAGTGGTGCAAAAAGTAGCCATGGAAAGCATAGTAATATGGGGAAAGACTCCTAAATTTAGACTACCCATACAGAAAGATACATGGGAGACATGGTGGATGGACTATTGGCAGGCTACTTGGATCCCTGAATGGGAGTTTGTCAACACCCCTCCTCTAGTAAAATTGTGGTACCAATTAGAGAAAGACCCCATAGAAGGAGTAGAGACTTTCTATGTAGATGGGGCAGCTAATAGGGAAACTAAGCTAGGAAAAGCAGGATATGTCACTGACAGAGGAAGGCAAAAGGTTGTTTCTCTAACTGAGACAACAAATCAAAAGACTGAACTACATGCAATCCATCTAGCCTTGCAGGATTCAGGATCAGGAGTAAATATAGTAACAGACTCCCAGTATGCATTAGGAATCATTCAGGCACAACCAGACAAAAGTGACTCAGAAATAGTCAATCTAATAATAGAGAAGCTAATAGAAAAAGATAAAGTCTACCTATCATGGGTACCAGCACATAAGGGGATTGGAGGAAATGAACAAGTAGATAAATTAGTCAGCTCTGGAATCAGGAAGATACTATTTTTAGATGGGATAGATAAGGCTCAAGAAGAACATGAAAGATATCACAGCAATTGGAGAGCAATGGCTAGTGACTTTAATCTGCCACCTATAGTAGCAAAAGAAATAGTAGCTAGTTGTGACAAATGTCAGCTAAAAGGGGAAGCCATGCATGGACAAGTAGACTGTAGCCCAGGAATATGGCAACTAGATTGCACACATCTAGAAGGAAAAGTTATCCTGGTAGCAGTCCATGTAGCCAGTGGCTATATAGAAGCAGAAGTTATCCCAGCAGAAACAGGGCAGGAGGCAGCATACTTTTTGCTAAAATTAGCAGGAGGATGGCCAGTAAAAGTAGTACACACAGACAATGGCAGCAATTTTACCAGCGCTGCATTTAAAGCAGCCTGTTGGTGGGCAAACATCCAACAGGAATTTGGGATTCCCTACAATCCCCAAAGTCAAGGAGTGGTAGAATCTATGAATAAGGAATTAAAGAAAATCATAGGGCAGATAAGAGAGCAAGCTGAACACCTTAAAACAGCAGTACAAATGGCAGTATTCATTCACAATTTTAAAAGAAAAGGGGGGATTGGGGGGTACAGTGCAGGGGAAAGAATAATAGACATAATAGCAACAGACATACAAACTAAAGAATTACAAAAACAAATTACAAAAATTCAAAATTTTCGGGTTTATTACAGGGACAGCAGAGATCCAGTTTGGAAAGGACCAGCAAAACTACTCTGGAAAGGTGAAGGGGCAATAGTAATACAGGACAATAGTGATATAAAGGTAGTGCCCAGAAGAAAAGCAAAGATCATTAGGGATTATGGAAAACAGATGGCAGGTGATGATTGTGTGGCAGGTAGACAGGATGAGGATTAGAACATGGAACAGTGTAGTAAAACATCATATGTATGTCTCAAAGAAAGCTAAAGAGTGGTCCTATAGACATCACTTTGAAAGCATGAATCCAGGAGTAAGTTCAGAAGTACACATCCCACTAGGAGATGCTAGACTAATAATAAGAACATATTGGGGTTTGCATACAGGAGAAAAAGATTGGCAATTGGGTCATGGGGTCTCCATAGAATGGAGGCTAAAAAGATATAGAACACAAATAGATCCTGATCTGGCAGACCAACTAATTCATCTGCATTATTTTAAATGTTTTTCAGACTCTGCCATAAGGAAAGCCATATTAGGACAAGTAGTTAGCCCTAGGTGTGAGTATCAGGCAGGACATAACAAGGTAGGATCTCTACAATATTTGGCACTGAAAGCATTAGTAACACCAACAAGGATAAGGCCACCTTTGCCTAGTGTTAGGAAATTAGCAGAGGACAGATGGAACAAGCCCCAGAAGACCAGGGGCCCCAGAGGGAACCATACAATGAATGGACATTAGAACTGTTAGAAGAGCTTAAGAATGAAGCTGTTAGGCATTTTCCTAGGCCATGGCTCCATGGATTAGGACAATATATCTATAACACCTATGGGGATACTTGGGAAGGAGTTGAAGCTATAATAAGAATTTTGCAACAACTACTGTTTGTTCATTTCAGAATTGGGTGCCAACATAGCAGAATAGGCATTATTCGAAGCAGAAGAGTCAGGGATGGATCCGGTAGATCCTAACCTAGAGCCCTGGAACCATCCAGGAAGTCAGCCTGCAACTGCTTGTAGCACGTGTTACTGTAAAAAGTGTTGCTATCATTGTCCAGTTTGCTTTTTGAACAAAGGCTTAGGAATCTCCTATGGCAGGAAGAAGCGGAGACAGCGACGAAGAACTCCTCAGAGTAGTAAAGATCATCAAAATCCTGTACCAAAGCAGTAAGTATTAGTAATTAGTATATGTAATGTTGCCTTTGCAAATCTGTGCAATAGCAGGACTGGTAGTGGCACTAATCCTAGCCATAGTTGTGTGGACTATAGTAGGTATAGAATATATAAGATTAAGAAAGCAAAAGAAAATAGACAGGTTAATTGAGAGAATAAGGGAAAGGGCAGAAGACAGTGGCAATGAGAGTGATGGGGATACAGATGAATTGGCAAAACTTGTGGAGATGGGGAACTATGATCTTGGGGGTGATATTAATTTGTAGTGCTGCAGAAAACTTGTGGGTTACTGTCTACTATGGGGTACCTGTGTGGAGAGATGCAGAGACCACCTTATTTTGTGCATCAGATGCAAAATCATATGATACAGAAATGCATAATGTCTGGGCCACACATGCCTGTGTACCTACAGACCCCAACCCACAAGAAATAAATTTGAAAAATGTGACAGAAGAGTTTAACATGTGGAAAAATAAAATGGTAGAGCAGATGCATACAGATATAATCAGTCTATGGGACCAAAGCTTAAAGCCATGTGTAAAGTTAACCCCTCTCTGTGTTACTTTAGAGTGTAGCAACCCATCAACAGGTATCAATAAAACCACAGACATGAGAAATAACATCACAGACATGAAAAACTGCTCTTTCAATATGACCACAGAATTAAGGGATAAGAAACAGAGAGTATACTCACTTTTTTATAAACTGGATGTAGTACCAATTAATGACAACAGTAGCAATACCTATAGATTAATAAATTGTAATACCTCAGCCATAACACAGGCTTGTCCAAAGGTATCCTTTGAGCCAATTCCCATACATTACTGTGCTCCAGCTGGTTTTGCGATTCTAAAGTGTAATGATAAAGAGTTCAATGGAACAGGGCTATGCAAGGATGTCAGCACAGTACAATGCACACATGGAATCAAGCCAGTAGTATCAACTCAACTGCTGTTAAATGGCAGTCTAGCAAAAGAAAGGGTAATAATTAGATCTGAAAATATTACAGACAATATCAAAAACATAATAGTACAACTTAACGAGTCTGTAGAAATTAGTTGTATCAGACCTAACAACAATACAAGAAAAAGTGTACGTATAGGACCAGGACAAGCATTCTATGCAACAGACATAACAGGGGATATAAGACAAGCATATTGTAATGTTAGTAAAAGGGGATGGAATAACACTTTGCAAAAGGTAGTTGAACAATTAAGAGTACACTTTGAGAACAAAACAATAACCTTTGCTAACTCCTCAGGAGGGGATCTAGAAATAACAACACATAGTTTTAATTGTGGAGGAGAATTTTTCTATTGTGACACATCAGGCCTGTTTAATAGCACTTGGTATAATACTTGGAATAGCACTGAATCAAAAAGCACGGAGTCAAACGACATTACTCTCCAATGCAGAATAAAGCAAATTATAAATATGTGGCAGAGAGCAGGACAAGCAATATATGCCCCTCCCATCCAAGGAGTAATAATGTGTAAATCAAATATTACAGGACTAATATTAACAAGAGATGGTGGAGGTAATAGCAGTGAACCTGAAACCTTCAGACCTGGAGGAGGAGACATGAGGGACAATTGGAGAAGTGAATTGTATAAGTATAAAGTAGTAAAAATTGAACCACTAGGAGTAGCACCCACCAAGGCAAGGAGAAGAGTGGTGCAGAGAGAAAAAAGAACAGTTGGAATAGGAGCTGTGTTCCTTGGGTTCTTAGGAGCAGCAGGAAGCACTATGGGCGCGGCGTCAATAACGCTGACGGCACAGGCCAGAGCATTACTGTCTGGCATAGTGCAACAGCAAAGCAATTTGCTGAGGGCTATAGAGGCTCAACAACATCTGTTGAGACTCACGGTCTGGGGCATTAAACAGCTCCATGCAAGAGTCCTGGCTGTGGAAGGATACCTAAGGGATCAACAGCTCCTAGGAATTTGGGGCTGCTCTGGAAAACTCATCTGCACCACTAATGTGCCCTGGAACTCTAGTTGGAGTAATAAATCCCAGAATGAGATATGGGGCAACATGACCTGGCTGCAGTGGGATAAAGAAATTAGCAATTACACACAGATAATATATAGCCTAATTGAAGAATCACAGAACCAGCAGGAAAAGAATGAACAAGACTTATTGGCATTGGATAAATGGGCAAATCTGTGGAATTGGTTTGACATATCAAACTGGCTGTGGTATATAAAAATATTTATAATGATAGTAGGAGGCTTAATAGGATTAAGAATAGTTTTTGCTGTACTTTCTATAATAAATAGAGTTAGGCAGGGATACTCACCCTTGTCGTTCCAGACCCTTACCCCAGTCCCAAGGGGTCTCGACAGGCCCGGAAGAATCGAAGAAGAAGGTGGAGAGCAAGACAGAGACAGATCGATTCGATTAGTGAGCGGATTCTTGGCACTTGCCTGGGACGACCTGCGGAGCCTGTGCCTTTTCAGCTACCACCGATTGAGAGACTTCATATTGATTGCAGCGAGGACTGTGGAACTTCTGGGGCACAGCAGTCTCAAGGGACTGAGACTGGGGTGGGAAGGCCTCAAGTATCTGGGGAATCTTCTATCATATTGGGGTCAGGAACTAAAAATTAGTGCTATTAACCTGTTTGATACCATAGCAATAGCAGTAGCTGAGTGGACAGATAGGGTTGTAGAAATAGGACAAAGACTTTGTAGAGCTATTCTCCACATACCTAGAAGAATCAGACAAGGCTTAGAAAGGGCTTTGCTATAACATGGGGGGCAAGTGGTCAAAAAGCAGCATAGTGGGATGGCCTGAGGTTAGGGAAAGGATAAGACAAACTCCTCCAGCAGCAAAAGGAGTAGGAGCAGTATCTCAAGATTTAGATAAACATGGAGCAATCACAATCAGCAACATAAATCACCCTAGTTGCGCCTGGCTGGAGGCACAAGAGGACGAGGAGGTGGGCTTTCCAGTTAGGCCACAAGTACCTTTAAGGCCAATGACTTACAAGGGAGCTTTTGATCTCAGCCACTTTTTAAAAGAAAAGGGGGGACTGGATGGGTTAGTTTACTCCAGGAGGAGACAAGAAATCCTTGATCTGTGGGTGTATAACACACAAGGCTTCTTCCCTGACTGGCAGAACTACACACCAGGGCCAGGGACCAGGTTCCCACTAACATTTGGATGGTGCTTCAAGCTAGTACCAGTTGATCCAGATGAAGTAGAGAAGGCTACTGAGGGAGAGAACAACAGCCTCTTACACCCCATATGCCAACATGGAATGGATGATGAGGAGAGAGAAACATTAATATGGAAGTTTGACAGCCACCTGGCATTAAAGCACATAGCCCAAGAGCTGCATCCGGAGTTCTACAAAGACTGCTGACACAGAAGTTGCTGACTGGGACTTTCCGCGGGGACTTTCCAGGGGAGGTGTGGTTTGGGCGGAGTTGGGGAGTGGCTAACCCTCAGACGCTGCATATAAGCAGCTGCTTTTCGCCTGTACGGGGTCTCTCCTGTTAGACCAGATTGAGCCCGGGAGCTCTCTGGCTAGCTAGGGAACCCACTGCT
>A1.UG.98.98UG57134_AF484507_B.RU.04.04RU128005_AY682547
GCGAGAGCGTCAGTATTAAGTGGGGGAAAATTGGATCGATGGGAGAAGATTCGGTTAAGGCCAGGAGGAAGTAAAAGATATAGATTGAAACATTTAGTATGGGCAAGCAGGGAGCTGGAAAGATTTGCACTTAACCCTGGCCTTTTAGAAACAGCAGAAGGATGTCAGCAAATAATTGAACAGTTACAACCAGCTCTTAAGACAGGAACAGAAGAAATTAAATCATTATTTAATACAGTAGCAACCCTCTATTGTGTACATCAACGGATAGAGGTAAAAGATACCAAGGAAGCTCTAGATAAAATAGAGGAAATACAAAATAAAAGTAAGCAAAAGGCACAACAGGCAGCAGCTGACCCAAAACCTAGCAGCAAGGTCAGCCAGAATTACCCTATAGTACAAAATGCACAAGGGCAAATGATACACCAGTCCGTGTCACCTAGGACTTTGAATGCATGGGTAAAAGTAATAGAAGAAAAGGCTTTCAGCCCAGAAGTAATACCCATGTTCTCAGCATTATCAGAAGGAGCCACCCCACAAGATTTAAATATGATGCTGAACATAGTGGGGGGACACCAGGCAGCTATGCAAATGTTAAAAGATACCATCAATGAGGAAGCTGCAGAATGGGACAGGTTACATCCAGTACATGCAGGGCCTGTTGCACCAGGCCAGATGAGAGAACCAAGGGGAAGTGATATAGCAGGAACTACTAGCACCCCTCAAGAACAAATAGCATGGATGACAGCTAACCCACCTATCCCAGTGGGAGATATCTATAAAAGATGGATAATTTTGGGATTAAATAAAATAGTAAGAATGTATAGCCCTGTTAGCATTCTGGATATAAAACAGGGGCCAAAAGAACCCTTCAGAGACTATGTAGATAGGTTCTTTAAAGTTCTCAGAGCTGAGCAAGCTACACAGGAGGTAAAAGGTTGGATGACAGAAACATTACTGGTCCAAAATGCAAATCCAGATTGTAAGTCCATTTTGAGAGCATTAGGAACAGGGGCTACATTAGAAGAAATGATGACAGCATGCCAGGGAGTGGGAGGACCCGGCCATAAGGCAAGGGTTTTGGCTGAGGCAATGAGTCAAGTACAACATACAAATGTAATGATGCAGAGAGGCAATTTTAAGGGCCAGAAAAAGATTAAGTGTTTCAACTGTGGCAAAGAGGGACACCTAGCCAGAAATTGCAGGGCCCCTAGGAAAAAGGGCTGTTGGAAATGTGGAAGGGAGGGACACCAAATGAAAGACTGCACTGAGAGACAGGCTAATTTTTTAGGGAAAATTTGGCCTTCCCACAAGGGGAGGCCAGGAAATTTTCCTCAGAACAGACTGGAGCCAACAGCCCCACCAGCAGAGATCTTTGGGATGAGGGAAGAGATAGCCTCCCCTCCGAAGCAGGAGCAGAAGGACGGGGACCCACCCTTAGTTTCCCTCAAATCACTCTTTGGCAACGACCCCTTGTCACAGTAAAAGTAGGGGGACAGCTAAGAGAAGCTCTATTAGACACAGGAGCAGATGACACAGTACTAGAAGACATAAATTTGCCAGGAAAATGGAAACCAAAAATGATAGGGGGAATTGGAGGTTTTATCAAGGTAAAACAGTATGATCAAATACTTATAGAAATTTGTGGAAAAAAGGCTATAGGTACAGTATTGGTAGGACCTACACCTGTCAACATAATTGGAAGAAATATGTTGACCCAGATTGGCTGTACTTTAAATTTCCCAATCAGTCCTATTAAGACTGTACCAGTAAAATTAAAGCCAGGAATGGATGGCCCAAAGGTTAAACAATGGCCATTGACAGAAGAAAAAATAAAAGCATTGACAGAAATTTGTACAGAAATGGAAAAGGAAGGAAAAATTTCAAAAATTGGGCCTGAAAATCCATACAATACTCCAATATTTGCTATAAAGAAAAAAGACAGTACTAAATGGAGGAAATTAGTAGACTTTAGAGAGCTCAATAAAAGAACTCAAGACTTTTGGGAAGTTCAATTAGGAATACCACATCCAGCAGGCTTGAAAAAGAAAAAATCAGTAACAGTACTAGATGTGGGGGACGCATATTTTTCAGTTCCCTTAGATGAAGACTTTAGAAAGTATACTGCATTCACCATACCTAGTACAAACAATGAGACACCAGGAGTCAGGTATCAGTACAATGTGCTTCCACAGGGATGGAAAGGATCACCAGCAATATTCCAGAGTAGCATGACAAAAATCTTAGAGCCCTTTAGATCAAAGAATCCAGAAATAATTATCTATCAATACATGGATGACTTGTATGTAGGATCTGATTTAGAAATAGGGCAACATAGAACAAAAATAGAAGAGTTGAGAGCTCATCTATTGAGCTGGGGATTAACTACACCAGACAAAAAGCATCAGAAAGAACCTCCATTTCTTTGGATGGGATATGAACTCCATCCTGACAAGTGGACAGTCCAACCTATACAGCTGCCAGAAAAAGACAGCTGGACTGTCAATGATATACAGAAATTAGTAGGGAAACTAAATTGGGCAAGTCAGATTTATCCAGGAATCAAGGTAAAACAATTGTGTAGACTCCTCAGGGGAGCCAAAGCATTAACAGATATAGTACCATTGACTGAGGAAGCAGAACTAGAATTGGCAGAAAACAGGGAGATTCTAAAAGACCCTGTGCATGGGGTATATTATGACCCGTCAAAAGACTTGATAGCAGAAATACAGAAACAAGGGCAGGACCAATGGACATATCAAATTTATCAGGAGCCATTTAAAAATCTAAAAACAGGAAAATATGCAAGAAAGAAGTCTGCTCACACTAATGATGTAAAGCAATTAACAGAGGTGGTGCAAAAAGTGGTCATGGAAAGCATAGTAATATGGGGAAAGACTCCTAAATTTAAGTTACTCATACAAAAAGAAACATGGGAAACATGGTGGATGGACTATTGGCAGGCCACCTGGATTCCTGAATGGGAATTTGTCGATACCCCTCCTCTAGTAAAATTATGGTACCAGTTAGGAAAAGACCCCATAGTAGGAGCAGAGACCTTCTATGTAGATGGGGCAGCCAGTAGAGAAACTAAGCTAGGAAAAGCAGGGTATGTTACTAACAGAGGAAGACAAAAAGTTGTCTCCCTAACTGACACAACGAATCAGAAAACTGAGTTACAAGCAATTCATCTAGCTTTGCAGGATTCAGGATTAGAAGTAAATATAGTAACAGACTCACAATATGCACTAGGAATCATTCAGGCACAACCAGACAGGAGTGAATCAGAGATAGTCAATCAAATAATAGAGAAGCTAATAGAAAAGGACAAGATCTACCTGTCATGGGTACCAGCACACAAAGGAATTGGAGGAAATGAACAAGTAGATAAATTAGTCAGTTCTGGAATCAGGAAAGTGCTATTCTTAGATGGGATAGATAAAGCTCAAGAAGAACATGAAAGGTATCACAGCAATTGGAGAACAATGGCTAGTGATTTTAATCTGCCACCTATAGTAGCAAAGGAAATAGTAGCCAGCTGTGATAAATGTCAGCTAAAAGGGGAAGCCATGCATGGACAAGTAGACTGCAGTCCTGGGATATGGCAATTAGATTGCACACATCTAGAAGGAAAAATAATTCTGGTAGCAGTCCATGTAGCCAGTGGCTATATAGAAGCAGAAGTTATCCCAGCAGAAACAGGACAGGAGGCAGCATACTTTATACTAAAATTAGCAGGAAGATGGCCAGTAAAAGTAGTACACACAGACAATGGCAGCAATTTCACCAGCGCTGCATTCAAAGCAGCCTGTTGGTGAGCAAATGTCCAACAGGAATTTGGAATTCCCTACAATCCCCAAAGTCAAGGAGTAGTAGAATCTATGAATAAGGAATTAAAGAAAATCATAGGGCAGGTAAGAGAGCAAGCTGAGCACCTTAAGACAGCAGTACAAATGGCAGTATTCATTCACAATTTTAAAAGAAAAGGGGGGATTGGGGGGTACAGTGCAGGGGAAAGAATAATAGACATAATAGCATCAGATATACAAACTAGAGAATTACAAAAACAAATTACAAATATTCAAAAATTTCGGGTTTATTACAGGGACAGCAGAGATCCAATTTGGAAAGGACCAGCAAAACTACTCTGGAAAGGTGAAGGGGCAGTGGTAATACAAGACAATAGCGATATAAAAGTAGTACCAAGAAGAAAAGCAAAGATCATTAGGGATTATGGAAAACAGATGGCAGGTGATGATTGTGTGGCAGGTAGACAGGATGAAGATTAGAGCATGGAATAGTTTAGTAAAACATCATATGTATATCTCAAAGAAAGCTAAAAGATGGTTTTATAGACATCACTATGAAAGCAGGCATCCAAGAGTAAGTTCAGAAGTACACATCCCACTAGGGGATGCTAGAATAGTAGTAAGAACATATTGGGGTCTGCATACAGGAGAAAAAGAATGGCACTTGGGCCATGGGGTCTCCATAGAATGGAGGATGAAAAGATATAGCACACAAATAGATCCTGACCTGGCAGACCAACTAATTCATCTGCATTATTTTGACTGTTTTTCAGAGTCTGCCATAAGGAGAGCCATATTAGGACAAGTAGTTAGTCCTAGGTGTGAATATCAAACAGGACATAACAAGGTAGGATCTCTACAATATTTAGCACTGAAAGCATTAGTAACACCAACAAGGGCAAAGCCACCTTTGCCTAGTGTTAGGAAATTAACAGAGGATAGATGGAACAAGCCCCAGAAGACCAAGGGCCCCAGAGGGAGCCATACAATGAATGGATGCTAGATCTGTTAGAAGATCTTAAGCATGAAGCTGTTAGACATTTTCCTAGGCCATGGCTCCATGGATTAGGACAGCATATCTATATCACCTATGGGGATACTTGGGAAGGAGTTGAAGCTATAGTAAGAATCTTGCAGCAACTACTGTTTGTTCATTTCAGAATCGGGTGCCAACACAGCAGAATAGGCATTATTCGAGGGAGAAGAGCCAGGGATGGATCCGGTAGATCCTAACCTAGAGCCCTGGAACCATCCGGGAAGTCAGCCCACAACTCCTTGTAGTAAGTGTTACTGTAAAGCGTGTTGCTATCATTGCTTAGTTTGCTTTCAGACCAAAGGCTTAGGCATCTCCTATGGCAGGAAGAAGCGGAGACAGCGACGAGGAACTCCTCCAAGTGATAAGGACCATCAAAATCCTATACCAAAGCAGTGAGTATTAGTAATTAACATATGTAATGTCCCCTTTAGAAATTAGTGCAATAGTAGGACTGATAGTAGCATTTATCCTAGCAATAGTTGTATGGACTATAGTAGGTATAGAATATAAGAGATTGCTAAAGCAAAGGAAAATAGATAGGTTAATTGAGAGAATAAGAGAAAGAGCAGAAGACAGTGGCAATGAGAGTGATGGGGATACAGACGAATTGTCAACACTTGTTAACATGGGGAACTATGATCTTGGGAATAATAATAATCTGTAGTGCTGCAGAAAACTTGTGGGTTACTGTCTATTATGGGGTACCTGTATGGAAAGACGCAGGGACCACCTTATTTTGTGCCTCAGATGCTAAAGCATATAAGAAAGAAGCACATAATGTATGGGCTACACATGCCTGTGTACCCACAGACCCCAACCCACAAGAAATAGACTTGGACAATGTGACAGAAGATTTTAACATGTGGAAAAATAACATGGTAGAGCAGATGCATACAGATATAATCAGTCTATGGGACCAAAGCCTAAAGCCATGTGTAAAGCTAACCCCTCTCTGCGTCACTCTAAATTGTAGCCATACCAATGTCAATGTCGGTAGCATGTATCTCAACATCAAGGAAAGCCTGAAAGAAGAAATAAAAAACTGTTCTTTCAATATGACCACAGAAATAAGGGATAAGGAAAAAAAAGTATATTCACTTTTTTATAAACTTGATGTAGTAGAAATTAATGATAAAAATAATAGTAGTAATAATAACAGTAACAGTAGTGAGTCTAAACTGTATAGATTAATAAATTGTAATACCTCAGCCATCACACAAGCTTGTCCAAAGGTATCCTTTGAGCCAATTCCTATACATTATTGTGCCCCAGCTGGTTTTGCGATCCTAAAGTGTAATGATGAGGAGTTCAATGGAACAGGACCATGCAAGAAGGTCAGCACAGTGCAATGCACACATGGAATCAGGCCAGTGGTTTCAACTCAACTGCTATTAAATGGCAGTCTAGCAAAAGGAGAGGTAAAAATTAGATCTGAAAATATCTCAGACAATGCTAAAACCATAATAGTACAACTTACAGAGCCTGTAAACATTAGTTGTATCAGACCTAACAACAATACAAGGACAAGTATACATATAGCACCAGGACAAGCATTCTATGCAACAGGTGGCATAATAGGGGATATAAGACAAGCACATTGTAATGTCAGTGGAGCAAAATGGAATCAAACATTACAAAAGGTAGTTAAGCAATTAGGAAAGCACTGGAACACAACAACAATAATCTTTAAAAACTCCTCGGGGGGGGATTTAGAAATTACAACACATAGTTTTAATTGTGGAGGAGAATTTTTCTATTGTAATACATCACAATTGTTTAATAGCATTTGGAATGTCACTAACAGCACAGAGTCAGAGAATAGCACGGGGTCAGATGACACTATAACTCTTCCATGCAGAATAAAGCAAATTATAAAGATGTGGCAGAGAACAGGACAAGCAATATATGCCCCCCCCATCCAAGGAGTAATAAGGTGTGAATCAAACATTACAGGACTATTATTAACAAGAGATGGTGGGAATAACAATACAGGTAATGAAACCTTCAGACCTGCAGGAGGAGATATGAAGGACAATTGGAGAAGTGAATTATATAAGTACAAAGTAGTAAAAATTGAACCACTAGGAGTAGCACCCACCAAGGCAAGAAGGAGAGTGGTGGAGAGAGAAAAAAGAGCAGTTGGAATAGGAGCTGTATTCCTTGGGTTCTTAGGAACAGCAGGAAGCACTATGGGCGCGGCGTCAATAACGCTGACGGTACAGGTCAGACAATTATTGTCTGGCATAGTGCAACAGCAAGGCAATTTGCTGAGGGCTATAGAGGCTCAACAACAGCTGTTGGAACTCACGGTCTGGGGCATTAAACAGCTCCAGGCAAGAGTCCTGGCTGTGGAAAAGTACCTAAAGGATCAACAGCTCCTAGGAATTTGGGGCTGCTCTGGAAAACTCATCTGCACCACTAATGTGCCTTGGAACTCTAGTTGGAGTAATAAATCCCAGCATGAGATATGGGATAACCTGACCTGGCTGCAATGGGATAAAGAGATTAACAATTACACACACGAAATATATAGGCTACTTGAAGAATCGCAGATCCAGCAGGAAAAGAATGAACAAGACTTATTGGCATTAGACAAGTGGGCAAGTCTGTGGAATTGGTTTGACATATCAAGATGGCTGTGGTATATAAGAATATTTATAATGATAGTAGGAGGCTTAGTAGGATTAAGAATAGTTTTTGCAGTGCTTTCTATAATAAATAGAGTTAGGCAGGGATACTCACCTTTGTCGTTTCAGACCCATACCCCGCACCCAGGGGATCTCGACAGGCTCGGAAGAATCAACGAAGAAGGTGGAGAGCAAGACAGAGAAAGATCGATTCGCTTAGCCAGCGGATTCTTAACGCTCGCCTGGGACGATCTGAGGAGCCTGTGCCTCTTCAGCTACCACCGATTGAGAGACTTCATCTTGATTGCTGCGAGGACTGTGGAACTTCTGGGACACAGCATTCTCAAGGGGTTGAGACTGGTGTGGGAAGGACTCAAGTACCTGTGGAATCTCCTGCTGTATTGGGGTCGGGAACTGAAAATTAGTGCTATTAATTTGCTTGATACTATAGCAATAGCAGTAGCTGGCTGGACAGATAGGGTTATAGAAATAGGACAAGGAATTGGTAGAGCTATTCTCAACATACCTAGAAGAATCAGACAGGGCTTAGAAAGGGCTTTGCTATAACATGGGTGGCAAGTGGTCCAAAAATAGCAAAGGGGGATGGTCTGAGGTTAGGGAAAAAATAAAACAAACTCCTCCAGCAACTCCTCCAGCAGCAAAAGGAGTAGGAGCAGTATCTCAAGATTTAGAGAAACATGGAGCAGTCACAAGCAGTAATATAAATCACCCTAGTTGCGCCTGGCTGGAAGCGCAAGAAGAAGAGGAGGTAGGCTTTCCAGTTAGGCCACAAGTACCTTTAAGACCAATGACTTACAAGGGAGCTTTTGATCTTGGCTTCTTTTTAAAAGAAAAGGGGGGACTGGATGGGTTAATTTACTCCAGGAGAAGACAAGAAATCCTTGATCTGTGGGTCTACAACACACAGGGCTTCTTCCCTGATTGGCAGAATTACACACCAGGGCCAGGGGTCAGATACCCACTGACATTTGGATGGTGCTTCAAGCTAGTACCAGTTGATCCAGACGAAGTAGAGAAGGCTAATGAGGGAGAGAACAACAGCCTATTACACCCTATGTGCCAACATGGAATGGATGATGAGGAGAGAGAAACATTAATGTGGAAGTTTGACAGCAGCCTAGCACGGAGACACGTAGCCCGAGAACAACATCCGGAGTTCTACAAAGACTGCTGACACAGAAGCTGCTGACAGGGACTTTCTGCTGGGGACTTTCCAGGGGAGGTGTGGTTTGGGCGGAGTTGGGGAGTGGCTAACCCTCAGATGCTGCATATAAGCAGCTGCTTCTCGCTTGTACTGGGTCTCTCTTGTTAGACCAGATCGAGCCTGGGAGCTCTCTGGCTAGCTAGGGAACCCACTGCT
>A1.UG.x.UG031_AB098331_C.TZ.01.BD22_11_AY253321
TGGATGGGTTAATTTACTCCAGGAAAAGACAGGAAATCCTTGATCTGTGGGTCTACAACACACAAGGCCACTTCCCTGATTGGCAGAATTACACACCAGGGCCAGGGACCAGATTCCCACTAACATTTGGATGGTGCTTCAAGTTAGTACCAGTTGATCCAGATAAAGTAGAAAGGGCTACTGAGGGAGAGAACACCAGCCTATTACACCCTATAAGCCTACATGGAATGGATGATGAAGAAGGAGAAACATTAATGTGGAAGTTTGACAGCCGCCTGGCATTTACACACAGAGCCCGAGAGCTGCATCCGGAGTACTACAAAGACTGCTGACACAGAAGTTGCTGACAAGGGACTTTCCGCTGGGGACTTTCCAGGGGAGGTGGAGTTTGGGGAGTGGCTAACCTTCAGATGCTGCATATAAGCAGCCGCTTTTCGCCTGTACTGGGTCTCTCTTGTTAGGCCAGATCGAGCCTGGGAGCTCTCTGGCTAGCTAGGGAACCCACTGCTTAAGCCTCAATAAAGCTTGCCTTGAGTGCTTCAAGTAGTGTGTGCCCGTCTGTTGTTTGACTCTGGTAACTAGAGATCCCTCAGACCACTCTAGACAGTGTAAAAATCTCTAGCAGTGGCGCCCGAACAGGGACTCGAAAGCGAAAGTTCCAGAGAAGTTCTCTCGACGCAGGACTCGGCTTGCTGAGGTGCACACAGCAAGAGGCGAGAGCGGCGACTGGTGAGTACGCCAATTTTTGACTAGCGGAGGCTAGAAGGAGAGAGATGGGTGCGAGAGCGTCAGTATTAAGCGGGGGAAAATTAGATGCATGGGAGAAAATTCGGTTAAGGCCAGGGGGAAAGAAAAAATATAGACTAAAACATATAGTATGGGCAAGCAGGGAGCTGGAAAGATTCGCACTTAACCCTAGCCTTTTAGAAACAACAGAAGGATGTCAGCAAATAATGGAACAGTTACAACCAGCTCTCAAGACAGGAACAGAAGAACTTAGATCATTATATAATACAGTAGCAACCCTCTACTGCGTACATCAAAGGATAGATGTGAAAGACACCAAGGAAGCTTTAGATAAAGTAGAGGAAATACAAAATAAAAGCAAACAAAAGACACAACAGGCAGCAGCTGGCACAGGAAACAGCAGCAAAGTCAGCCAAAATTACCCTATAGTGCAAAATGCACAAGGGCAAATGGTATACCAGGCTGTAACACCTAGGACTTTGAATGCATGGGTGAAAGTAGTAGAAGAGAGGGCTTTCAGCCCAGAAGTAATACCCATGTTCTCAGCATTATCAGAAGGAGCCACCCCACAAGATTTGAATATGATGCTGAACATAGTGGGGGGCCATCAGGCAGCTATGCAAATGTTAAAAGATACCATCAATGAGGAAGCTGCAGAATGGGACAGGTTACATCCACCACAGGCAGGGCCTGTTGCACCAGGCCAACTGAGAGACCCAAGGGGAAGTGATATAGCAGGAACTACTAGTACCCCTCAAGAACAAATAGGATGGATGACAGGCAACCCACCTATCCCAGTGGGAGACATCTATAAAAGATGGATAATCCTGGGATTAAATAAAATAGTAAGAATGTATAGCCCTGTTAGCATTTTGGATATAAAACAAGGGCCAAAAGAGCCCTTCAGAGATTATGTAGATAGGTTCTTTAAAACTCTCAGAGCTGAGCAAGCTTCACAGGAGGTAAAAGGTTGGATGACAGAAACATTACTGGTCCAAAATGCAAATCCAGATTGTAAGTCCATTCTAAAAGCATTAGGAACAGGGGCTACATTAGAAGAAATGATGACAGCATGCCAGGGAGTGGGAGGACCCAGCCATAAAGCAAGGATTTTGGCTGAGGCAATGAGTCAAGCACAACATACAAACATAATGATGCAGAGAGGTAATTTTAGAGGCCAGAAAAGGATTAAGTGTTTCAACTGTGGCAAAGAAGGACACCTAGCCAAACATTGCAGGGCCCTTAGGAAAAAGGGCTGTTGGAAATGTGGGAAGGAGGGACACCAAATGAAAGACTGCACTGAAAGACAGGCTAATTTTTTAGGGAAAATTTGGCCTTCCAGCAAGGGGAGGCCAGGAAATTTTCCACAGAGCAGACCGGAGCCAACAGCCCCACCAGCGGAGCTCTTTGGGATGGGGGGAGAGATATTCTCCCCTCCGAAGCAGGAACAAAAAGACAGGGACCAGGCCTCACCTTTAGTTTCCCTCAAATCACTCTTTGGCAACGACCCCTTGTCACAGTAAAAATAGGGGGACAGCTAAAAGAAGCTCTATTAGATACAGGAGCAGATGATACAGTATTTGAAGACATAAATTTGCCAGGAAAATGGAAACCAAGAATGATAGGGGGAATTGGAGGTTTCATCAAAGTAAAACAGCATGATCAGATACTTATAGAAATTTGTGGAAAAAAGGCTATAGGTACAGTGTTGGTAGGACCTACACCTGTCAACATAATTGGAAGAAATATGTTGACCCAGATTGGTTGTACTTTAAATCTCCCAATTAGTCCTATTGATACTGTACCAGTAAAATTAAAGCCAGGAATGGATGGCCCAAAGGTTAAACAATGGCCATTGACAGAAGAAAAAGTAAAAGCATTAACAGAAATTTGTATAGATATGGAAAAGGAAGGAAAAATTTCAAGAATTGGGCCTGAAAATCCATACAATACTCCAATATTTGCTATAAAGAAAAAAGACAGCACTAAATGGAGAAAATTAGTAGATTTCAGAGAGCTCAATAAAAGAACTCAAGACTTTTGGGAAGTTCAATTAGGAATACCGCACCCAGCGGGCTTAAAAAAGAAAGAATCAGTGACAGTACTAGATGTGGGGGACGCATATTTTTCAGTTCCCTTAGATGAAAGCTTTAGAAAGTATACTGCATTCACCATACCTAGTACAAACAATGAGACACCAGGAATCAGGTATCAGTACAATGTGCTTCCACAGGGATGGAAAGGATCACCAGCAATATTCCAGAGTAGCATGACAAAAATTTTAGAGCCCTTCAGATCAAAAAATCCAGAAATAATTATCTATCAGTACATGGATGACTTGTATGTGGGATCTGATTTAGAAATAGGGAAGCATAGAGCAAAAATAGAAGAGTTGAGAGCTCATCTATTGAGCTGGGGGTTTACTACACCAGACAAAAAGCATCAGAAAGAACCTCCATTTCTTTGGATGGGATATGAACTCCATCCTGACAAGTGGACAGTCCAACCTATAGAGCTGCCAGTAAAAGAAAGCTGGACTGTCAATGATATACAGAAATTAGTGGGAAAACTAAATTGGGCGAGTCAAATTTATGCAGGAATTCAAGTAAAACAATTGTGTAAACTCCTCAGGGGAGCCAAAGCACTAACAGATATAGTAACGTTGACTGAGGAAGCAGAATTAGAATTGGCAGAGAACAGGGAAATTCTAAAAGACCCTGTGCATGGAGTATATTATGACCCATCAAAAGACTTAATAGCAGAAATACAGAAACAAGGGCAAGACCAATGGACATATCAAATTTATCAAGAGCCATTTAAAAACCTGAAAACAGGAAAATATGCAAGAAAGAGGTCTGCTCACACAAATGATGTAAAACAATTAGCAGAAGTAGTGCAAAAGGTGACCATGGAAAGCATAGTAATATGGGGAAAGACTCCTAAATTTAAACTACCCATACAAAAAGAAACATGGGAAACATGGTGGAGGGACTATTGGCAGGCTACCTGGATTCCTGAATGGGAGTTTGTCAATACCCCTCCTCTAGTAAAATTATGGTACCAGCTAGAGAAAGACCCTATAGTAGGAGCAGAAACTTTCTATGTAGATGGGGCAGCTAATAGGGAAACTAAGCTGGGAAAGGCAGGGTATGTCACTGACAGAGGAAGACAAAAAGTTGTTTCCCTAAATGAGACAACAAATCAAAAAACTGAATTACATGCTATCTATCTAGCCTTGCAAGATTCAGGATCAGAAGTAAATATAGTAACAGACTCACAGTATGCATTAGGAATCATTCAGGCACAACCAGACAGGAGTGAATCAGGGTTAGTCAGTCAAATAATAGAGAAGCTAATAGAAAAAGACAAAGTCTACCTATCATGGGTACCAGCACACAAGGGAATTGGAGGAAATGAACAAGTAGATAAATTAGTCAGTTCAGGAATCAGGAAGGTGCTATTTTTAGATGGGATAGATAAGGCTCAAGAAGAACATGAAAGATATCACAGCAATTGGAGAACAATGGCTAGTGATTTTAATCTGCCACCTGTAGTAGCAAAGGAAATAGTGGCCAGCTGTGATAAATGTCAACTAAAAGGAGAAGCCATGCATGGACAAGTAGACTGTAGCCCAGGAATATGGCAATTAGATTGCACACATCTAGAAGGAAAAGTAATCCTGGTAGCAGTCCATGTGGCCAGTGGGTATATAGAAGCAGAAGTTATCCCAGCAGAAACAGGACAGGAGACAGCATACTTTCTGCTAAAATTAGCAGGAAGATGGCCAGTAAAAGTAGTGCACACAGACAATGGCCCCAATTTCACCAGCGCTACAGTTAAAGCAGCTTGCTGGTGGGCAAATATCCAACAGGAATTTGGGATTCCCTACAATCCCCAAAGTCAAGGAGTAGTGGAATCTATGAATAAGGAATTAAAGAAAATCATAGGGCAGGTAAGAGACCAAGCTGAACACCTTAAGACAGCAGTACAAATGGCAGTATTCATCCACAATTTTAAAAGAAAAGGGGGGATTGGGGGGTACAGTGCAGGGGAAAGAATAATAGACATAATAGCAACAGATCTACAAACTAAAGAATTACAAAAACAAATTACAAAAATTCAAAAATTTCGGGTTTATTACAGGGACAGCAGAGATCCAATTTGGAAAGGACCAGCAAAACTACTCTGGAAAGGTGAAGGGGCGGTAGTAATACAAGACAACAGTGATATAAAGGTAGTGCCAAGAAGAAAAGCAAAGATCATTAGGGATTATGGAAAACAGATGGCAGGTGATGATTGTGTGGCAGGTAGACAGGATGAGGATTAAAACATGGAATAGTTTAGTAAAACATCATATGTATATCTCAAAGAAAGCTAATGGTTGGTCTTATAGACATCACTATGAAAGCAGACATCCAAAAGTAAGTTCAGAAGTACACATCCCACTAGGGGATGCTAGAATAGTAGTAAGAACATATTGGGGGCTGCATACAGGAGAAAAAGACTGGCACTTGGGTCATGGAGTCTCCATAGAATGGAGGCTAAAAAGATATAGCACACAATTAAATCCTGACCTGGCAGACCAACTAATTCATGTGTATTATTTTGACTGTTTTTCAGAATCTGCCATAAGGAAAGCCATATTAAGACAAGTAGTTAGCCCTAGTTGTGAATATCAAACAGGACACAACAAGGTAGGATCTCTACAATATTTAGCACTGAAAGCATTAGTAACACCAACAAGAACAAAGCCACCTCTGCCAAGTGTTAGGAAATTAGCAGAGGATAGATGGAACAAGCCCCAGAAGACCAGGGGCCCCAGAGGGAGCCATACAATGAATGGATGTTAGAACTGTTAGAAGATCTTAAACATGAAGCTGTTAGGCATTTTCCTAGGCCATGGCTCCATGGGTTAGGACAACATATCTATAACACCTATGGGGATACTTGGGAAGGAGTTGAAGCTATAATGAGAATTTTGCAACAACTACTGTTTGTTCATTTCAGAATTGGGTGCCAACATAGCAGAATAGGCATCATTCGAGGGAGAAGAGTCAGGGATGGATCCAGTAGATCCTAGACTAGAGCCCTGGAACCATCCAGGAAGTCAGCCTAAAACTGCTTGTAATGGGTGTTATTGCAAACGCTGCAGCTATCATTGTCTAGTTTGCTTTCAGAAAAAAGGCTTAGGCATTTCCTATGGCAGGAAGAAGCGGAGACAGCGACGAGGAACTCCTCAAAGCAATAAGGATCATCAAAATCCTCTACAAAAGCAGTAAGTATTAGTAACTAGTAGAGGTAATGCTTTCTTTGGAAATCTGTGCAATAGTAGGACTGATAGTGGTAGGAATCATAGCAATAGTTGTGTGGACTCTAGTAGGTATAGAATATAAGAGATTGCTAAAACAAAGGAAAATAGACAGGTTAATTAAGAGAATAAGAGAAAGAGCAGAAGACAGTGGCAATGAGAGTGAGGGGGATACAGACGAGTTGGCAAAACTTGTGGAGATGGGGAACTATGATCTTGGGAATGCTAATGATTTATAGTGCTGCAGAAAACTTGTGGGTTACTGTCTACTACGGGGTACCTGTGTGGAAAGACGCAGAGACCACCTTATTTTGTGCATCAGATGCTAAAGCATATGATACAGAAGTACATAATGTCTGGGCGACACATGCCTGTGTACCCACAGACCCCAACCCACAAGAAATACACTTGGAAAATGTGACAGAAGATTTTAACATGTGGAAAAATAATATGGTAGAGCAGATGCATACAGATATAATCAGTCTATGGGATCAGAGCCTAAAGCCATGTGTAGAATTAACCCCTCTCTGCGTTACTTTAGATTGTCTAAACGCCACCCTCAATGCCACCGCCCCCAATGTCACCAATGACATGGAAGGAGAAATGAAAAACTGCTCTTACAATATAACCACAGAATTAAAGGATAAGAAACAGCAAGTGTATTCACTTTTTTATAAGCTTGATGTAGTACAAATTAATGAAAAGAATAAAACAAACAAGTATAGATTAATAAATTGTAATACCTCAGCCATTACACAGGCTTGTCCAAAGGTATCCTTTGAGCCAATTCCCATACATTATTGTGCCCCAGCTGGCTTTGCGATTCTAAAGTGTAAGGATACAGAGTTCAATGGAACAGGGCCATGCAAGAATGTCAGCACAGTACAATGCACACATGGAATCCGGCCAGTAATATCAACTCAACTGCTGTTAAATGGTAGTCTAGCAGAAGGAGGGATACAGATTAGATCTGAAAATATCACAAACAATGCCAAAACCATAATAGTACAACTTGATAAGGCTGTAAAAATTAATTGTACCAGACCTAACAACAATACAAGAAAAAGTGTAAGGATAGGACCAGGACAAGCATTCTATGCAACAGGTGATATAATAGGGGATATAAGACAGGCACATTGTAATGTCAGTAGAGCAAAATGGAACGAAACTTTACGAGGGATAGCCAAAAAACTAAGCGAACACTTTAAAAACAAAATAATAATCTTTGAGAAATCCTCAGGAGGGGATATAGAAATTACAACACATAGTTTTAATTGTGGAGGAGAATTTTTCTATTGTAATACATCAGGCCTGTTCAATGGCACCTGGAAGCCAAACAGCACAGAGTCAAACAACACAACGCCAAATGACACTATAACTCTTACATGCAGAATAAAGCAAATTATAAATATGTGGCAGAAAGTAGGACAAGCAATGTATGCCCCTCCCATTCAAGGAGTAATAAGGTGTGAATCAAACATTACAGGACTACTATTAACAAGAGATGGAGGGATTAACAGTATAAATGAAACCTTCAGACCTGGAGGAGGAAATATGAGGGACAATTGGAGAAGTGAATTATATAAGTATAAAGTAGTAAAAATTGAACCACTAGGAGTAGCACCCTCCAGGGCAAAGAGAAGAGTGGTGGAGAGAGAAAAAAGAGCAGTTGGAATAGGAGCTGTCTTCCTTGGGTTCTTAGGAGCAGCTGGAAGCACTATGGGCGCGGCGTCAATAACGCTGACGGCACAGGCCAGACAATTATTGTCTGGTATAGTGCAACAGCAAAGCAATTTGCTGAGGGCTATAAAGGCTCAACAGCATATGTTGAAGCTCACGGTCTGGGGCATTAAACAGCTCCAGGCACGAGTCCTGGCTGTGGAAAGATATCTAAAGGATCAACAGCTCCTAGGAATTTGGGGCTGCTCTGGAAAACTCATCTGCACCACTAATGTGCCCTGGAACTCTAGTTGGAGTAATAAATCTATGAATGAGATATGGGATAACATGACTTGGCTGCAATGGGAAAAAGAAATTAGCAATTACACACAATTAATATATAATCTAATTGAAGAATCGCAGAACCAGCAGGAAAAGAATGAACAAGACTTGTTGGCATTGGACAAGTGGGCAAGTCTGTGGAATTGGTTTGACATATCAAGGTGGCTGTGGTATATAAAAATATTTATAATGATAGTAGGAGGCTTAATAGGATTAAGAATAGTTTTTGCTGTGCTTTCTGTAATAAATAGAGTTAGGCAGGGATACTCACCTCTGTCATTCCAGATCCGTACCCCAAACCCAGAGGAACCCGACAGGCTCGGAAGAATCGGCGAAGAAGGTGGAGAGCAAGACAGAGACAGATCGATTCGATTAGTAAGCGGATTCTTAGCACTTGCCTGGGACGACCTGCGGAGCCTGTGCCTTTTCAGCTACCACCGCTTGAGAGACTTCATCTCGATTGCAGCGAGGACTGTGGAACTTCTGGGACACAGCAGTCTCAAGGGACTGAGACTGGGGTGGGAAGGCCTCAAGTATCTGTGGAATCTTCTGTTATATTGGGGCCTGGAGCTAAAAACTAGTGCTGTCAATTTGGTTGATACCATAGCAATAGCAGTAGCTGGCTGGACAGATAGGGTTATAGAAATAGGACAAAGAATTTTTAGAGCTATTCTTAACATACCTAGAAGAATCAGACAGGGCCTTGAAAGGGGCTTGCTATAACATGGGTGGTAAGTGGTCAAAAAGTAGCATAGTGGGATGGCCTCAGGTTAGGGAAAGAATGAGACAAACTCCTCCAGCAGCAGAAGGAGTAGGAGCAGTATCTCAAGATTTAGATAAATATGGAGCAATCACGAGCAGTAATATAAATCACCCTAGTTGCACCTGGCTGGAAGCGCAAGAGGAAGAGGAGGTAGGCTTCCCAGTCAGACCGCAAGTACCTCTAAGACCAATGACTTACAAGGGAGCTCTGGATCTCAGCCACTTTTTAAAAGAAAAGGGGGGACTGGATAGGTTAATTTACTCCAGGAAAAGACAAGAAATCCTTGATCTGTGGGTCTACAACACACAAGGCTACTTCCCTGATTGGCAGAATTACACACCAGGGCCAGGGATCAGATACCCACTAACATTTGGATGGTGCTTCAAGCTAGTACCAGTTGATCCAGAGGAAGTAGAGAAGGCTACTGAGGGAGAGAACAACTGCCTATTACACCCTATAAGCCAACATGGAATGGAGGATGAAGAAAGAGAAACATTAATGTGGCAGTTTGACAGCCGCCTGGCACTTACACACAGAGCTCAAGAGTTGCATCCGGAGTTCTACAAGAACTGCTGACACAGAAGATGCTGACAGGGACTTTCCGCTAGGGACTCTCCAGGGGAGGTGTGGTTTGGGCGGAGTTGGGGAGTGGCTAACCCTCAGATGCTGCATATAAGCAGCTGCTTTTCGCCTGTACTGGGTCTCTCTTGTTAGACCAGATAGAGTCTGGGAACTCTCTGGCTAGCGAGGGAACCCACTGCTTAAGCCTCAATAAAGCTTGCCTTGAGTGC
>A1.UZ.02.02UZ0672_AY829212_D.UG.99.99UGF03726_AF484519
GCGAGAGCGTCAGTATTAAGCGGGGGAAAATTAGATGCATGGGAAAAAATTCGGTTAAGGCCAGGGGGAAAGAAAAAATATAGAATAAAACACCTAGTATGGGCAAGCAGGGAGCTGGAAAGATTCGCGCTTAACCCTAGCCTTTTAGAAACATCAGAAGGATGTCAACAAATACTGGAACAGTTACAACCAACTCTCAAGACAGGATCAGAAGAACTTAAATCATTATATAATACAGTAGCAACCCTCTATTGTGTACATCAACGGATAGAGATAAAAGACACCAAGGAAGCTTTAGATAAAATAGAGGAAATACAAAATAAGAGCAAGCAAAAGACCCAACAGGCAGCAACTGTCACAGGAAGCAGCAGCAAGGTCAGTCAAAATTACCCCATAGTGCAAAATGCACAAGGGCAAATGACACACCAGTCCATGTCACCTAGGACTTTGAATGCATGGGTGAAAGTAATAGAAGAAAAGGCTTTCAGCCCAGAAGTAATACCCATGTTTTCAGCATTGTCAGAGGGAGCCACCCCACAAGATTTAAACATGATGCTGAACATAGTGGGGGGACACCAGGCAGCTATGCAAATGTTGAAAGATACCATCAATGAGGAAGCTGCTGAATGGGATAGGTTACATCCAGCACAGGCAGGGCCTTTTCCACCAGGGCAGATGAGAGAACCAAGGGGAAGTGACATAGCAGGAACTACTAGTACCCTTCAAGAACAAATAGGATGGATGACAAGCAACCCACCTATCCCAGTGGGAGACATCTATAAAAGATGGATAATCCTAGGATTAAATAAAATAGTACGAATGTATAGCCCTGTTAGCATTTTAGACATAAGACAAGGGCCAAAAGAACCCTTCAGAGACTATGTAGATAGGTTCTTTAAAACTCTTAGAGCTGAGCAAGCTACACAGGATGTAAAGAACTGGATGACAGAAACCCTGCTGGTCCAAAATGCAAATCCAGATTGTAAAACTATTTTAAGAGCATTAGGATCAGGGGCTACATTAGAAGAAATGATGACAGCATGCCAGGGAGTGGGAGGACCCGGCCATAAAGCAAGGGTTTTGGCCGAGGCAATGAGTCAAGTACAAAATGCAAACATAATGATGCAGAAAAGTAATTTTAGGGGCCCAAAAAGAATTAAGTGTTTCAACTGTGGCAAAGAAGGACACCTAGCCAGAAATTGCAGGGCCCCTAGGAAAAAGGGCTGTTGGAAATGTGGAAAGGAAGGCCATCAAATGAAAGACTGCACTGAGAGACAGGCTAATTTTTTAGGGAGAATTTGGCCTTCCAGCAAAGGGAGGCCAGGAAATTTTCCTCAGAGCAGACCAGAACCATCAGCCCCACCAGCAGAAAACTTTGGGATGGGGGAAGAGATAACCCCCTCCCTGAAACAGGAACAGAAAGACAGGGAACAACGTCCTCCTTCAATTTCCCTCAAATCACTCTTTGGCAACGACCCCTTGTCACAGTAAGAATAGGAGGACAGCTAAAAGAAGCTCTATTAGATACAGGAGCAGATGATACGGTATTAGAAGACATAAATTTGCCAGGAAAATGGAAACCAAAAATGATAGGGGGAATTGGAGGTTTTATCAAGGTAAGACAGTATGATCAGATACTTATAGAAATTTGTGGAAAAAAGGCTATAGGTACGGTATTAATAGGGCCTACCCCTGTCAACATAATTGGAAGAAATATGTTGACTCAGCTTGGTTGTACTTTAAATTTTCCAATAAGTCCTATTGAAACTGTACCAGTAACATTAAAGCCAGGAATGGATGGCCCAAAGGTTAAACAATGGCCATTAACAGAAGAGAAAATAAAAGCATTAATAGACATTTGTAAGGAGATGGAGAAGGAAGGAAAAATTTCAAAAATTGGGCCTGAAAATCCATACAATACTCCAATATTTGTTATAAAGAAAAAAGATAGCACTAAGTGGAGGAAATTAGTAGATTTCAGGGAGCTCAATAAAAGAACTCAGGACTTTTGGGAAGTTCAATTAGGAATACCCCATCCAGCGGGTTTAAAAAAGAAAAAATCAGTAACAGTACTAGATGTGGGGGATGCATATTTTTCAGTTCCTTTAGATGAAAGCTTCAGAAAGTATACTGCATTCACTATACCAAGTATAAACAATGAGACACCAGGGATCAGATATCAGTACAATGTACTCCCACAGGGATGGAAAGGATCACCATCAATATTCCAGAGTAGCATGACAAAAATCTTAGAGCCATTTAGATTAAAAAATCCAGAAATAGTTATTTATCAATACATGGATGACTTGTATGTAGGCTCTGATTTAGAAATAGGGCAACATAGAACAAAAATAGAGGAGTTAAGAGCTCATCTATTGAGCTGGGGATTTACTACACCAGACAAAAAGCATCAGAAAGAACCTCCATTTCTTTGGATGGGATATGAACTCCATCCTGACAAATGGACAGTCCAGCCTATAATGCTACCAGATAAAGACAGCTGGACTGTCAATGATATACAGAAATTAGTGGGAAAACTAAATTGGGCAAGTCAGATTTATCCAGGGATTAAAGTAAGGCAATTGTGTAAACTCCTCAGGGGAGCCAAAGCACTGACAGATATAGTGACACTGACTGAGGAAGCAGAATTAGAATTGGCAGAGAACAGAGAGATTCTAAAAGAACCGGTGCATGGAGTATATTATGACCCATCAAAAGATTTAGTAGCAGAAATACAGAAACAAGGACAAGACCAATGGACATATCAAATTTATCAGGAGCCATTTAAAAATCTAAAAACAGGAAAATATGCAAAAAAGGGGTCTGCTCACACTAATGATGTAAAACAATTAACAGCAGTGGTGCAAAAAGTGGCCACAGAAAGCATAATAATATGGGGAAAGACTCCTAAATTTAGACTACCCATACAAAAAGAAACATGGGAAGCATGGTGGATGGAGTACTGGCAGGCTACCTGGATTCCTGAATGGGAGTTTGTCAATACCCCTCCTCTAGTAAAACTATGGTACCAGTTGGAAAAAGAACCCATAGTAGGAGCAGAGACTTTCTATGTAGATGGGGCAGCTAACAGGGAGACTAAGATAGGAAAAGCAGGGTATGTTACTGACAGAGGAAGACAAAAGGTTGTTCCTCTAACTGAGACAACAAATCAAAAGACTGAATTACATGCAATCCATCTAGCTTTGCAGGATTCAGGATCAGAAGTAAATATAGTAACAGACTCACAATATGCATTAGGAATTATTCAGGCACAACCAGACAGGAGTGAATCAGGGATAGTCAATAAAATAATAGAGAAACTAATAGAAAAAGAAAGAGTCTACCTGTCATGGGTACCAGCGCACAAGGGGATTGGAGGAAATAAACAAGTAGATAAATTAGTCAGTAATGGAATCAGGAGGGTGTTATTTTTAGAAGGGATAGATAAGGCTCAAGAAGAACATGAAAAATATCACAGCAATTGGAAAGCAATGGCTAGTGATTTTAATCTGCCACCTATAGTAGCAAAGGAAATAGTAGCCAGCTGTGATAAATGTCAATTAAAAGGGAAAGCTATGCATGGACAGGTAGACTGTAGTCCAGGGATTTGGCAATTAGATTGCACACATCTAGAAGGAAAAGTAATCATGGTAGCAGTCCATGTAGCCAGTGGCTATATAGAAGCAGAAGTTATCCCAGCAGAAACAGGACAGGAGACAGCATACTTTCTGCTAAAATTAGCAGGAAGATGGCCAGTAAAAGTAGTACACACAGATAATGGCCCCAATTTCACCAGCAGTGCAGTTAAGGCTGCCTGTTGGTGGGCAAATATCCAACAGGAATTTGGGATTCCCTACAATCCCCAAAGTCAAGGAGTAGTGGAGTCTATGAATAAGGAATTAAAGAAAATCATAGGGCAGGTAAGAGAGCAAGCTGAACACCTTAAGACAGCAGTACAAATGGCAGTATTCATTCCCAATTTTAAAAGAAAAGGGGGGATTGGGGGGTCCAGTGCAGGGGAAAGAATAATAGACATAATAGCAACAGACATCCAAACTAAAGAATTACAAAAACAAATTATAAAAATTCAAAATTTTCGGGTTTATTACAGAGACAGCAGAGATCCAATTTGGAAAGGACCAGCAAAACTACTCTGGAAAGGTGAAGGGGCAGTGGTAATACAGGACAATAACGATATAAAAGTAGTACCAAGAAGAAAAGCAAAGATCATTAGGGATTATGGAAAACAGATGGCAGGTGATGATTGTGTGGCAAGTAGACAGGATGAGGATTAGAACATGGAACAGTTTAGTAAAACATCATATGTATGTCTCAAAGAAAGCTAGAGAGTGGTTTTATAGACATCACTATGAAAGCAGAAATCCAAGAGTAAGTTCAGAAGTACACATCCCACTAGGGGATGCTAGGCTAGTAGTAAAAACATATTGGGGTCTGCATACAGGAGAAAAAGACTGGCACTTGGGTCATGGGGTCTCCATAGAATGGAGACAGGAAAGGTATAGCACACAAATAGACCCTGACCTGGCGGACCAACTAATTCATCTGTATTATTTTGACTGTTTTTCAGAATCTGCCATAAGGAAAGCCATAGTAGGACACATAGTTAGCCCTAGGTGTAACTATCCAGCAGGACACAACAAGGTAGGATCTCTACAATACTTGGCACTGAAAGCATTAGTAACACCAACAAGGGAAAGGCCACCTTTGCCTAGTGTTAGGAAACTAACAGAGGATAGATGGAACAAGCCCCAGAAGACCAGGGGCCGCAGAGGGAACCACACAATGAATGGATGTTAGAACTGTTAGAAGATATTAAGCATGAAGCTGTCAGACATTTTCCAAGGCCGTGGCTCCATGGATTAGGACAACATATCTATAACACCTATGGGGATACTTGGGAAGGGGTTGAAGCTATAATAAGAACTTTGCAACAACTACTGTTTGTTCATTTCAGAATTGGGTGCCAACATAGCAGAATAGGCATTGTGCAAAGGAGAAGAGTCAGGAATGGATCCAGTAGATCCTAACCTAGAGCCCTGGAATCATCCGGGAAGTCAGCCTAAAACTGCTTGTAGCAATTGTTACTGTAAAAAGTGTTGCTGGCATTGCCAAGTTTGCTTTCTAAAAAAAGGCTTAGGCATCTCCTATGGCAGGAAGAAGCGGAGACACAGACGAGGAACTCCTCACAGCAGTAAGGATCATCAAAATCTTATATCAAAGCAGTAAGTACTAAATAAATGTAATGACACCTTTAGAAATCTATGCAATAGTAGCATTAGTAGTAGTGTTTGTCATAGCAATAGTTGTGTGGACTATAGTAGGTATAGAATATAGGAAATTACTAAAACAAAGAAAAATAGACTGGTTAATTGATAGAATAAGAGAAAGAGCAGAAGATAGTGGCAATGAGAGTGAGGGGGATAGAGAGGAATTACTTGAGATGGGGCATGATGCTCCTTGGGATATTGATGGCATATAGTGCTAAAGAACAGTTGTGGGTTACGGTATACTATGGGGTACCTGTGTGGAGAGATGCAGAGACCACCCTATTTTGTGCATCAGATGCTAAAGCATATGATAAAGAAGTACACAATGTCTGGGCTACACATGCCTGTGTACCCACAGACCCTGACCCACAAGAAATGGCTTTGGAAAATGTGACAGAAAAATTTGACATGTGGAAAAATAACATGGTAGAACAAATGCAAACAGATATAATCAGTCTCTGGGACCAAAGCCTACAGCCATGTGTAAAGTTAACCCCTCTCTGCGTTACTTTAAATTGTGCTGAACCCAACAGCACTAGCTCTAACGTTAACAGCAACAGCAGCGATAGTTTGTTTGAAGAAATGAAAAACTGCACTTTCAACATGACCACAGAACTAAGAGATAAAAGGAAAACTGTACATTCACTTTTTTATAAACTTGATATAGTATCAACTGATAGTAATGGTAGTGGGCAGTATAGACTAATAAATTGCAATACATCAACCATGACACAGGCCTGTCCTAAGGTAACCTTTGAGCCAATTCCTATACATTATTGTGCCCCAGCTGGTTTTGCGATTCTAAAGTGCAAGGATACAAATTTTACTGGAACAGGGCCATGCAAGAATGTCAGCACAGTACAATGCACACATGGAATCAAGCCAGTAGTATCAACTCAACTGCTGTTAAATGGCAGTCTAGCAGAGAAAGAGGTAATGCTTAGATCTGAAAATATCACAGACAATGGCAAAATCATAATAGTACAGCTTACTGAGCCTGTAAACATCACTTGTATCAGACCTGGCAACAATACAAGAACAAGTATACGTATAGGACCAGGACAAACCTTCTATGCAACAGGTGATGTAATAGGGGACATAAGAAAAGCATATTGTAATGTCAGCAGAGCAGCATGGGATAGCACTTTACAAAAGATAAGTACACAATTAAGAAAATACTTTAATAACAAAACAATAATCTTTAAGAACTCCCCAGGAGGGGATTTAGAAGTTACAACACATAGTTTCAATTGTGGAGGAGAATTTTTCTATTGCAATACAACAGACCTGTTCAATAGCACTTGGGACAATGTCACAAATGTCACAAAGGCCAATGAAACTATAACTCTACCATGCAGAATAAAGCAAATTATAAATATGTGGCAGAGAGTAGGACAAGCAATGTATGCCCCTCCTATCAAAGGAAGTATAAGGTGTGAATCAAACATTACAGGACTACTACTAACAAGAGATGGTGGAGGTGGAACTAATAGCAGCAATGAGACCTTCAGACCTATAGGAGGAAATATGAAGGACAATTGGAGAAGTGAACTATATAAGTATAAAGTAGTAAAAATTGAACCAATAGGAGTAGCACCTACCAGGGCAAAGAGAAGAGTGGTGGAGAGAGAAAAAAGAGCAATTGGACTGGGAGCTGCCTTCCTTGGGTTCTTAGGAGCAGCAGGAAGTACTATGGGCGCGGCGTCAATGACGCTGACGGTACAGGCCAGACAATTGTTGTCTGGCATAGTGCAACAGCAAAGCAATTTGCTGAGGGCTATAGAGGCTCAGCAGCATCTGCTGAAACTCACGGTCTGGGGCATTAAACAGCTCCAGGCAAGAGTCCTGGCTGTGGAAAGATACCTAAAGGATCAGCAGCTCCTAGGAATTTGGGGTTGCTCTGGAAAACTCATCTGCACCACTAATGTGCCCTGGAACTCTAGTTGGAGTAACAAATCTCAGAGTGAGATATGGGATAACATGACCTGGATGCAATGGGACAAGGAAGTTATCAATTACACAGACATAATATATGATCTAATTGAAAAATCGCAAAACCAGCAGGAAAAGAATGAACAAGATTTATTGGCATTGGATAAGTGGGCAAGTCTGTGGAGTTGGTTTGACATATCAAATTGGTTATGGTATATAAAAATATTTATAATAATAGTAGGAGGCTTAATAGGATTAAGAATAGTTTTTGCTGTGCTTTCTATAATAAATAGAGCCAGGCAGGGATACTCACCCTTGTCATTGCAGACCCTTACCCCGCACCCAGAGGGACCAGACAGGCCCGGAAGAATCAACGAAGAAGGTGGAGAGCAAGGCAGAGACAGATCGATTCGATTGGTGAGCGGATTCTTAGCACTTGCCTGGGACGATCTGCGGAGCCTGTGTCTCTTCAGCTACCACCGATTGAGAGACTTCATCTCGATTGCAGCGAGGACTGTGGAACTTCTGGGACGCAGCAGTCTCAAGGGACTGAGACTGGGGTGGGAGGGCCTCAAGTATCTGGGGAATCTTCTGGGATATTGGGGTCAGGAACTAAAGAGTAGTGCTATCAATCTAATAGATACCATAGCAATAGCAGTAGCTAGGTGGACAGATAGGGTTATAGAAATAGGACAAAGACTTTGTAGAGCCATTCGTAACATACCTAGGAGAATCAGACAGGGCGCAGAAAGGGCTTTGCAATAACATGGGGGGCAAATGGTCAAAAAGTAGTATAGTGGGATGGCCTCAGGTTAGGGAAAGAATAAGACGAGCTCCTGCTCCAGCAGCAAGAGGAGTAGGACCAGTATCTCAAGATTTGGATAAGCATGGAGCAGTCACAAGCAGTAATACAGCAGCCAATAATGCTGATTGCGCCTGGCTGGAGGCGCAAAAGGAAGAGGAGGTAGGCTTTCCAGTCAGGCCGCAGGTACCTTTGAGACCGATGACATATAAGGGAGCTATCGATCTCAGCCACTTTTTAAAAAAAAAGGGGGGACTGGATGGGCTAATTTACTCCAAGAAAAGACAAGAAATCCTTGATCTGTGGGTCTATCACACACAAGGCTACTTCCCTGATTGGCAGAATTATACCCCAGGGCCAGGGATTAGATTCCCACTAACATTTGGGTGGTGCTACAAGCTAGTACCAGTTGACCCAGAGGAAGTAGAAGAGGCCACAGAGGGAGAGAACAACAGCCTATTACACCCTATATGCCAACACGGAATGGATGATGAGGAAAAAGAAGTGTTAATGTGGAAGTTTGACAGTCGCCTGGCTCTAACACACAGAGCCCGAGAGCTACATCCGGAGTTCTACAAAGACTGCTGACACAGACTGCTGACATGAAGTTGCTGACAGGGACTTTCCGCGGGGACTTTCTAGGGGAGGTGTGGTTTGGGCGAAGTTGGGGAGTGGCTAACCCTCAGATGCTGCATATAAGCAGCTGCTTTTCGCCTGTACTGGGTCTCTCTGGTTAGACCAGATCGAGCCTGGGAGCTCTCTGGCTAGCTAGGGAACCCACTGCT
>A1.SE.95.SE8538_AF069669_F1.BR.89.BZ126_AY173957
GCGAGAGCGTCAGTATTAAGTGGGGGAAGATTAGATGCATGGGAGAAAATTCGGTTAAGGCCAGGGGGAAAGAAAAAATATAGAATGAAACATTTAGTATGGGCAAGCAGGGAGCTGGACAGATTCGCACTTAACCCTAGCCTTTTAGAAACAACAGAAGGATGTCAACAAATAATAGGACAGTTACAACCAGCTTTCAAGACAGGAACAGAAGAACTTAAATCATTATATAATACAGTAGCAACTCTCTGGTGCGTACATCAACGGATAGATGTAAAGGACACCAAGGAAGCTCTAGATAAATTAGAGGAAATACAAAAGAAGAGCAAGCAAAAGACACAACAGGCAGTAGCTGACACAGGAAGCAGCAGCAAGGTCAGCCATAATTACCCTGTAGTGCAAAATGCACAAGGGCAAATGATACACCAGAATTTGTCACCTAGGACTTTAAATGCATGGGTGAAAGTGATAGAAGAAAAGGGTTTTAACCCAGAAGTAATACCTATGTTCTCAGCATTATCAGAAGGAGCCACCCCACAAGATTTAAATACAATGCTGAACATAGTGGGGGGACACCAGGCAGCTATGCAAATGTTAAAAGACACCATCAATGAGGAAGCTGCAGAATGGGACAGGTTACATCCAGTACATGCAGGGCCTATTCCACCAGGCCAGATGAGAGAACCAAGGGGAAGTGACATAGCAGGAACTACTAGTACCCCTCAAGAACAATTACAATGGATGACAAGCAACCCACCTATCCCAGTGGGAGACATCTATAAAAGATGGATAATCCTGGGATTAAATAAAATAGTCAGAATGTATAGTCCTGTTAGCATTTTAGATATAAGACAAGGACCAAAAGAACCATTCAGGGACTATGTAGATAGGTTCTTTAAAGCTCTTAGAGCTGAGCAAGCCACACAGGAGGTAAAAGGTTGGATGACAGAAACATTATTGGTCCAAAATGCAAATCCAGATTGTAAGTCCATTTTAAAAGCATTAGGAACAGGAGCTACATTAGAAGAAATGATGACAGCATGTCAGGGAGTGGGAGGACCCGGCCATAAAGCAAGGGTTTTAGCTGAGGCAATGAGTCAAGTACAACAGCCCAACATAATGATGCAGAGAGGCAATTTCAGAGGCCAAAGAAGGATTAAGTGTTTTAACTGTGGCAAAGAAGGACACCTAGCCAAAAATTGCAGGGCCCCTAGGAAAAAGGGCTGTTGGAAATGTGGGAAGGAAGGGCACCAAATGAAAGACTGCACTGAAAGACAGGCTAATTTTTTAGGGAAAATTTGGCCTTCCAGCAAAGGGAGGCCAGGAAATTTTCCTCAGAGCAGACCAGAGCCAACAGCCCCACCAGCAGAGATCTTTGGGATGGGGGAAGTGATAACCTCCCCTCCGAAGCAGGAGCAGAAAGACAAGGAACAGGTCCCACCCTTAGTTTCCCTCAAATCACTCTTTGGCAACGACCCCTTGTCACAGTAAAAGTAGGAGGACAGCTAAAAGAAGCTCTATTAGATACAGGAGCAGATGATACAGTATTAGAAGACATAAATTTGCCAGGAAAATGGAGACCAAAAATGATAGGGGGAATTGGAGGTTTCATCAAGGTAAAACAGTATGATCAGATATCTATAGAAATTTGTGGAAAAAAGGCTATAGGTACAGTATTAGTAGGACCTACACCTGTCAACATAATTGGAAGAAATATGTTGACCCAGATTGGTTGTACTTTAAATTTCCCAATTAGTCCTATTGAGACTGTACCAGTAAAACTAAAACCAGGAATGGATGGTCCAAAAGTTAAACAATGGCCATTGACAGAAGAAAAAATAAAAGCATTAACAGAAATTTGTACAGAGATGGAAAAGGAAGGAAAAATTTCAAAAATTGGGCCCGAAAATCCATACAATACCCCAATATTTGCTATAAAGAAAAAAGACAGCAATAGATGGAGGAAATTAGTAGATTTCAGAGAGCTCAATAAAAGAACTCAAGACTTTTGGGAAGTCCAATTAGGAATACCGCATCCAGCGGGCCTAAAAAAGAAAAAATCAGTAACAGTACTGGATGTGGGGGACGCATATTTTTCAGTTCCTTTAGATGAGAGCTTTAGGAAGTATACCGCGTTCACCATACCCAGTACAAACAATGAGACACCAGGAATCAGGTATCAGTACAATGTGCTTCCACAGGGATGGAAGGGATCACCGTCGATATTCCAGAGTAGCATGACAAAAATCTTAGAGCCCTTTAGATCAAAAAATCCAGAAATAATTATCTATCAATACATGGATGACTTGTATGTAGGATCTGATTTAGAAATAGGGCAGCATAGAACAAAAATAGAAGAGTTAAGAGCTCATCTATTGAGCTGGGGACTTACTACCCCAGACAAAAAGCATCAGAAAGAACCACCATTTCTTTGGATGGGATATGAACTCCATCCTGACAAGTGGACAGTCCAGCCTATAAACCTGCCAGAAAAAGAAAGTTGGACTGTCAATGATATACAGAAATTAGTGGGAAAACTGAATTGGGCAAGTCAAATTTATGCAGGGATTAAAGTAAAGCAATTGTGTAAGCTCCTCAGAGGAGCCAAAGCACTAACAGATATAGTAACATTGACTGAGGAAGCAGAACTAGAATTGGCAGAGAACAGAGAGATTCTAAAAGCCCCTGTGCATGGAGTGTACTATGACCCATCAAAAGACTTAATAGCAGAAATACAGAAACAAGGGCAAGACCAATGGACATACCAAATTTATCAAGAGCCATTTAAAAATTTAAAAACAGGAAAGTATGCAAGAAAGAGGTCTGCTCACACTAATGATGTAAAACAATTAGCAGAAGTGGTGCAAAAGGTGGTCATGGAAAGCATAGTAATATGGGGAAAGACTCCTAAATTTAAAGTACCCATACAGAAAGAAACATGGGAAACATGGTGGATGGAGTATTGGCAGGCTACCTGGATTCCTGAATGGGAGTTTGTCAATACCCCTCCTCTAGTAAAATTATGGTACCAGTTAGAGAAAGACCCCATAGCAGGAGCAGAGACTTTCTATGTAGATGGGGCAGCCAATAGAGAAACTAAGCTAGGAAAAGCAGGGTATGTCACTGACAGAGGAAGACAAAAGGTTGTTTCCCTAACTGAGACAACAAATCAAAAAACTGAAGTACATGCAATCCATCTAGCTTTGCAGGATTCAGGATCAGAGGTAAATATAGTAACAGACTCACAGTATGCATTAGGAATCATTCAGGCACAACCAGACAGCAGTGAATCAGAGTTAGTCAATCAAATAATAGAGAAATTAATAGGAAAGGACAAAGTATACCTGTCATGGGTACCAGCACACAAAGGAATTGGAGGGAATGAACAAGTAGATAAATTAGTCAGTTCAGGAATCAGGAAGGTGCTGTTTTTGGATGGGATAGATAAAGCTCAAGAAGAACATGAGAGATATCACAGCAATTGGAGAGCAATGGCTAGTGATTTTAATCTGCCACCTGTAATAGCAAAGGAAATAGTAGCCAGCTGTAATAAATGTCAACTAAAAGGAGAAGCCATGCATGGACAAGTAGACTGTAGTCCAGGGATGTGGCAATTAGATTGCACACATCTAGAAGGAAAAGTAATTCTGGTAGCAGTCCATGTAGCCAGTGGCTATATAGAAGCAGAAGTTATCCCAGCAGAAACAGGACAGGAGACAGCATACTTTCTGCTAAAATTAGCAGGAAGATGGCCAGTAAAAGTAGTACACACAGACAATGGCAGCAATTTCACCAGCGCTGCATTTAAAGCAGCCTGTTGGTGGGCAAATGTCCAACAGGAATATGGAATTCCCTACAATCCCCAAAGTCAAGGAGTAGTGGAATCTATGAATAAGGAATTAAAGAAAATCATAGGACAGGTAAGAGAGCAAGCTGAACACCTTAAAACAGCAGTACAAATGGCAGTATTCATTCACAATTTTAAAAGAAAAGGGGGGATTGGGGGGTACAGTGCAGGGGAAAGGATAATAGACATAATAGCAACAGACATACAAACTAAAGAATTACAAAAACAAATTACAAAAATTCAAAATTTTCGGGTTTATTACAGGGACAGCAGAGATCCAATTTGGAAAGGACCAGCAAAACTACTCTGGAAAGGTGAAGGGGCAGTAGTAATACAGGACAATAGTGATATAAAGGTAGTACCAAGAAGAAAAGCAAAAATCATTAGGGATTATGGAAAACAGATGGCAGGTGATGATTGTGTGGCAGGTAGACAGGATGAGGATTAGAACATGGAACAGTTTAGTAAAACATCATATGTATATCTCAAAGAAAGCAAAAAATTGGTTTTATAGACATCACTTTGAAAGCAGGCATCCAAAAGTAAGTTCAGAAGTACACATCCCACTAGGAGAGGCTAAATTAGTAGTAAGAACATATTGGGGTCTGCAGACAGGAGAAAAAGATTGGCAATTGGGTCATGGGGTCTCCATAGAATGGAGGCTGAGAAGATATAGCACACAAATAGATCCTGACCTGGCAGACCAACTAATTCATATGCATTACTYTAACTGTTTTTCAGACTCTGCCATAAGGAAAGCCATATTAGGACAAGTAGTTAGCCCTAGTTGTGAATATCAAGCAGGACATAACAAGGTAGGATCTCTACAATATTTGGCACTGAAAGCATTAGTAACACCAAAAAAGATAAAGCCACCTCTGCCTAGTGTTAAGAAATTAACAGAGGACAGATGGAACAAGCCCCAGAAGACCAGGGGCCACAGAGGGAACCATACAATGCATGGATATTAGACTTGTTAGAAGAGCTTAAGCATGAAGCTGTTAGACATTTTCCTAGGCCATGGCTTCATGGATTAGGACAACATATCTATGATACCTATGGGGATACTTGGGAAGGAGTTGAAGCTATAACAAGAACTTTGCAACAATTACTGTTTGTTCATTTCAGAATTGGGTGCCACCATAGCAGAATAGGCATTATTCGAGGGAGAAGAGTCAGGGATGGAGCCGGTAGATCCTAACATAGAGCCCTGGAACCATCCAGGAAGTCAGCCTACAACTCCTTGCACCAAGTGTTATTGCAAAAAATGTTGCTATCATTGCCCAGCTTGCTTTCTGAACAAAGGCTTAGGCATCTCCTATGGCAGGAAGAAGCGGAAACAGCGACGAGGAACTCCTCAGGGCAATAAGGATCATCAAAATCCTATACCAAAGCAGTAAGTATTAGTAGTGAGTATATGTAATGTCTTACTTTTTAGCAATAAGCATAACAGCATTAATAGTAGCATTAATAATAGCAATAGTTGTGTGGACTATAGCATATATAGAATATAGGAAACTGTTAAGGCAAAGAAAAATAAATAGGTTATATGAAAGAATAAGAGAAAGAGCAGAAGACAGTGGCAATGAGAGTGAAGGGGATACAGAGGAACTCTCAGCACTTATTGAGATGGGGAACTATGATCTTGGGAATGATAATAATCTGTAGTACTGCAGACAAATTGTGGGTTACTGTCTACTATGGGGTACCTGTGTGGAAAGATGCAGAGACCACCCTATTCTGTGCATCAGATGCTAAAGCATATGATACAGAAGTGCATAATGTCTGGGCTACGCATGCCTGTGTACCCACAGACCCCAACCCACAAGAATTACATTTGGCAAATGTGACAGAGGAATTTAACATGTGGAAAAATAGCATGGTAGAGCAGATGCATACAGATATAATCAGTCTATGGGACCAAAGCCTAATACCATGTGTAAAATTAACCCCTCTCTGCGTCACTTTAGAGTGTAATGATTATAATTATAATGTCACCAATAGTAGTCATAGTTATAATGTCACCAACATGCAAGAAATGAAAAACTGCTCTTTCAATGTAACCACAGAACTAAGGGATAAGAGACAGAAAGTAACTTCACTTTTTTATAAACTTGATGTAGTACCAATTGGGGGGAATGATACTAATAGTACTCAGTATAGGTTAATAAATTGTAATACCTCAGCCATTACACAGGCTTGTCCAAAGGTAACCTTTGAGCCAATTCCTATACATTATTGTGCTCCAGCTGGTTTTGCGATTCTAAAGTGTAGGGATGAGAATTTCAATGGAACAGGGCCATGCAAGAATGTCAGCACAGTACAATGCACACATGGAATCAAACCAGTAGTATCAACTCAACTGCTGTTAAATGGCAGTCTAGCAAGAGAAAAGGTAATGATTAGATCTGAAAATATCACAAACAATGTCAAAAACATAATAGTACAACTTAAAGAGCCTGTAGAAATTAATTGTACCAGACCTGGCAACAATACAAGAAAAAGCATACGTATAGGACCAGGACAAGCATTCTATGCAACAGGTGAAGTGATAGGGGATATAAGACAAGCACATTGTAATGTTAGTAGAGCAAAATGGAATAAAACTTTGCATGAGGTAGCCAAACAATTAAGAACATACTTTAATAACAAAACAATAATCTTTACTAACTCCTCAGGAGGGGATCTAGAAATTACAACACATACTGTTAATTGTGGGGGAGAATTTTTCTACTGTAACACATCAGGCCTATTTAATAGCACTTGGTCTAGCAATGCCAGCGAGCCGATGTCAAATAGCACAGAGTCAAATGACACCATAACTCTCCAATGTAGAATAAGGCAAATTATAAATATGTGGCAGAGAGCAGGAAAAGCAATATATGCCCCTCCCATCCCAGGAATAATAAAGTGTGTATCAAACATTACAGGGCTAATATTAACAAGAGATGGTGGGAGTAATAACAGTACAAATGAAACCTTCAGACCTGGAGGAGGAGATATGAGGGACAATTGGAGAAGTGAATTATATAAATATAAAGTAGTAAAAATTGAACCCCTAGGAGTAGCACCCACCAAGGCAAAGAGAAGAGTGGTGGAGAGAGAAAAAAGAGCAATTGGAATAGGAGCTGTTTTCATTGGGTTCTTAGGAGCAGCAGGAAGCACTATGGGCGCGGCGTCAATAACGCTGACGGTACAGGCCAGACAATTATTGTCTGGYATAGTGCAACAGCAAAGCAATTTGCTGAGGGCTATAGAGGCTCAACAACATCTGTTGAAACTCACGGTCTGGGGCATTAAACAGCTCCAGGCAAGAGTCCTTGCTGTGGAAAGATACCTAAAGGATCAACAGCTCCTAGGAATTTGGGGCTGCTCTGGAAAACTCATCTGCACCACTAATGTGCCCTGGAATTCTAGTTGGAGTAATAAATCCCAGAGTGAGATATGGGACAACATGACCTGGCTGCAATGGGATAAAGAAATTAGCAATTACACACAGACAATATATAGGCTAATTGAAGAATCGCAGAACCAGCAGGAAAAGAATGAACAAGACTTATTAGCATTGGACAAGTGGGCAAGTCTGTGGAATTGGTTTGACATATCAAGATGGCTGTGGTATATAAGAATATTTATAATGATAGTAGGAGGCTTAATAGGATTAAGAATAGTTTTTGCAGTGCTGTCTGTAATAAATAGAGTTAGGCAGGGATACTCACCTTTATCATTTCAGATCCACACCCCAAACCCAGGGGATCTCGACAGGCCCGGAAGAATCGAAGAAGAAGGTGGAGAGCAAGACAGAGGCAGATCGATTCGATTAGTGAGCGGATTCTTAGCACTTGCCTGGGACGATCTGCGGAGCCTGTGCCTCTTCAGCTACCACCGCTTGAGGGACTTCATCTTGATTGCTGCGAGGACTGTGGAACTTCTGGGACAGAGGGGGTGGGAAGGCCTCAAGTATCTGTGGAATCTCCTGGTGTATTGGATTCGGGAACTAAAAATTAGTGCTATTAGCTTGCTTGATACCATAGCAATAGCAGTAGCTGGCTGGACAGATAGGGTTATAGAATTAGGACAAAGACTTTGTAGAGCTATTTTACACATACCTGTAAGAATCAGACAGGGCTTTGAAAGGGCTTTGCTATAACATGGGGGGCAAGTGGTCAAAAAGAAGCAAAGAGGGATGGTCTGAGGTTAGGGAAAAAATAAGGCAAACTCCTCCAGCAGCAAAAGGAGTAGGAGCAGTATCTCAAGATTTAGATAGACATGGAGCAATCACAAGCAGTAATATAAATCACCCTAGTTGCACCTGGCTGGAGGCACAAGAGGACGAGGAGGTAGGCTTTCCAGTCAAGCCACAGGTACCTCTAAGACCTATGACTTACAAGGGAGCTTTTGATCTCAGCCACTTTTTAAAAGAAAAGGGGGGACTGGATGGGTTAATCTACTCCAGGAAGAGACAGGAGATCCTTGATTTGTGGGTGTACAACACACAAGGYTACTTCCCTGATTGGCAGAATTACACACCAGGGCCAGGGGTCAGATACCCACTAACATTTGGGTGGTGCTTCAAGCTAGTACCAGTTGAACCAGAAGAAGTAGAGAAGGCTAATGAGGGAGAGAACAACAGCCTATTACACCCTATATGCCAACATGGAATGGATGATGAGGAGAGAGAAACATTAATGTGGAAGTTTGACAGCAAGCTGGCATTAAAGCACAGAGCCCATGAGCTGCATCCGGAGTACTTCAAGAACTGCTGACACAGAAGTTGCTGACAGGGACTTTCCGCTGGGGACTTTCCAGGGGAGGTGTGGTTTGGGCGGAGTTGGGGAGTGGCTAACCCTCAGATGCTGCATATAAGCAGCTGCTTTTCGCTTGTACTGGGTCTCTCTTGATAGACCAGATCGAGCCTGGGAGCTCTCTGGCTAGCAAGGGAACCCACTGCTTA
>A1.KE.00.KER2008_AF457052_F2.CM.95.MP255_AJ249236
GCGAGAGCGTCAGTATTAAGTGGGGGAAAATTAGATGCATGGGAGAAAATTCGGTTAAGGCCAGGGGGAAAGAAAAAATATAGACTGAAACACTTAGTATGGGCAAGCAGGGAGCTGGAAAAATTCGCACTTAACCCTGGCCTTTTAGAAACTTCAGAAGGATGTCAGCAAATAATGAACCAAATACAACCAGCTCTTCAGACAGGAACAGAAGAACTTAGATCATTATTTAATGCAGTAGCAACCCTCTATTGTGTACATCAGCGGATAGAGGTAAAAGACACCAAGGAAGCTTTAGATAAAGTAGAGGAAATACAAAACAAGAGCAAACAAAAGACACAACAGGCAGCAGCTGATACAGGAAACAACAGCAAGGTCAGCCATAATTACCCTATAGTGCAAAATGCACAAGGGCAAATGATACATCAGTCCTTATCACCAAGGACTTTGAATGCATGGGTAAAGGTAATAGAAGAAAGGGGTTTTAGCCCAGAAGTAATACCCATGTTCTCAGCATTATCAGAAGGAGCCACCCCACAAGATTTAAATATGATGCTGAACATAGTGGGGGGACACCAGGCAGCTATGCAAATGTTAAAAGAAACCATCAATGAGGAAGCTGCAGAATGGGACAGATTACATCCAGCACAGGCAGGGCCTATTCCACCAGGCCAGATAAGAGACCCAAGGGGAAGTGACATAGCAGGAACTACTAGCACCCCTCAAGAACAAATAACATGGATGACAAACAACCCACCTATCCCAGTGGGAGACATCTATAAAAGATGGATAATCCTAGGATTAAATAAAATAGTAAGAATGTATAGCCCTGTTAGCATTCTGGATATAAAACAAGGGCCAAAAGAACCCTTCAGAGACTATGTAGATAGGTTCTTTAAAGTTCTCAGAGCCGAACAAGCTACACAGGAAGTAAAAGGTTGGATGACAGAGACCCTGCTGGTTCAAAATGCAAATCCAGATTGTAAATCCATCCTAAGAGCATTAGGAACAGGGGCTACATTAGAAGAAATGATGACAGCATGCCAGGGAGTGGGAGGACCCAGCCATAAAGCAAGGGTTTTAGCTGAGGCAATGAGTCAAGCACAACAGGCAAATGTAATGATGCAGAGGGGCAATTTTAAGGGCCAGAAAAGAATTAAGTGTTTCAACTGTGGCAAAGAGGGACACCTAGCCAGAAATTGCAGAGCCCCTAGGAAAAAAGGCTGTTGGAAGTGTGGGAAAGAAGGACACCAAATGAAAGATTGCATTGAGAGACAGGCTAATTTTTTAGGGAAAATTTGGCCTTCCAGCAAAGGGAGGCCAGGGAATTTTCCTCAGAGCAGACCGGAGCCAACAGCCCCACCAGCAGAGATCTTTGGGATGGGAGAGGGGATAACCCCCTCCCCGAAGCAGGAGCAGAAAGGCGAGGAACAGGCTCCTCCCTTAGTTTCCCTCAAATCACTCTTTGGCAGCGACCCTTAGTCGCAATAAGAGTAGGGGGGCAACTAAGGGAGGCTTTATTAGATACAGGGGCAGATGATACAGTATTAGAAGATATAAATTTGCCAGGAAAATGGAAACCAAAAATGATAGGGGGAATTGGAGGTTTTATCAAGGTAAAACAATATGATCAGGTATCTATAGAAATTTGTGGAAAAAAGGCTATAGGTACAGTATTAGTAGGACCTACACCTGTCAACATAATTGGAAGAAATATGTTGACTCAAATTGGTTGTACTTTAAATTTTCCAATTAGTCCTATTGAAACTGTACCAGTAACATTAAAGCCAGGAATGGATGGCCCAAGGGTTAAACAATGGCCATTGACAGAAGAAAAAATAAAAGCATTGACAGAAATTTGTCAAGAGATGGAAAAGGAAGGAAAAATTTCAAAAATTGGGCCTGAAAATCCATACAATACTCCAATATTTGCAATAAAGAAAAAAGATAGCACTAAATGGAGGAAATTAGTAGATTTCAGAGAGCTCAATAAAAGAACACAAGACTTTTGGGAAGTTCAATTAGGGATACCGCACCCAGCGGGACTAAAAAGGAAAAAATCAGTAACAGTACTAGATGTGGGGGACGCATATTTCTCAGTTCCCCTAGATAAAAACTTTAGAAAGTATACTGCATTTACCATACCTAGTTTAAATAATGAAACACCAGGAATTAGGTATCAATACAATGTGCTTCCACAAGGATGGAAAGGATCACCAGCAATATTCCAGTGCAGTATGACAAAAATCTTAGAGCCCTTTAGATCAAAAAATCCAGAAATAATTATCTATCAATATATGGATGACCTGTATGTAGGATCAGATTTAGAAATAGGGCAGCATAGAGCAAAAATAGAAGAATTAAGAGCTCATCTACTGAGCTGGGGATTTACTACACCAGACAAAAAGCATCAGAAAGAACCTCCATTCCTTTGGATGGGATATGAGCTCCATCCTGACAAGTGGACAGTCCAGCCTATAGAGCTGCCAGAAAAAGAAAGCTGGACTGTCAATGATATACAGAAATTAGTGGGAAAACTAAATTGGGCCAGTCAAATTTATCCAGGAATTAAAGTAAAGCAATTATGTAAACTTCTTAGGGGAGCCAAAGCACTAACAGATATAGTAACACTGACTGAGGAAGCAGAATTAGAATTAGCAGAGAACAGGGAGATTCTAAAAGACCCTGTACATGGAGTATATTATGACCCATCAAAAGACTTAACAGCAGAAATACAGAAGCAAGGGCAAGACCAATGGACATACCAAATTTATCAGGAGCCATTTAAAAATTTAAAGACAGGAAAATATGCAAGAAAAAGGTCTGCCCACACTAATGATGTAAGACAATTAGCAGAAGTGGTGCAGAAAGTGGTCATGGAAAGCATAGTAATATGGGGAAAGACTCCTAAATTTAAACTACCCATACAAAAAGAGACATGGGAGACATGGTGGATGGACTATTGGCAGGCTACCTGGATTCCTGAATGGGAGTTTGTCAATACCCCTCCCCTAGTAAAATTATGGTACCAGTTGGAGAAAGACCCCATAGCAGGAGCAGAGACTTTCTATGTAGATGGGGCAGCCCATAGGGAGACTAAGCTAGGAAAGGCAGGATATGTCACTGACAGGGGAAGACAAAAGGTTGTTTCCCTGACTGAGACAACAAATCAAAAAACTGAACTACATGCAATTTATCTAGCCTTGCAGGATTCAGGATCAGAAGTAAATATAGTAACAGACTCACAGTATGCATTAGGAATCATTCAGGCACAACCAGACAGAAGTGAATCAGAGATAGTTAATCAAATAATAGAGAAGCTAATAGGAAAGGACAAAGTCTACCTGTCATGGGTACCAGCACACAAAGGGATTGGAGGAAATGAACAAGTAGATAAATTAGTCAGCTCTGGAATCAGGAGGGTACTATTTCTAGATGGGATAGATAAGGCTCAAGAAGAACATGAAAGATATCACAACAATTGGAGAGCAATGGCTAGTGATTTTAATATCCCACCTATAATAGCAAAGGAAATAGTAGCCAGCTGTGATAAATGTCAACTAAAAGGGGAAGCCATGCATGGACAAGTAGACTGTAGTCCAGGGATGTGGCAATTAGATTGCACACATCTAGAAGGAAAAGTAATTCTGGTAGCAGTCCATGTAGCCAGTGGCTATATAGAAGCAGAAGTTATCCCAGCAGAAACAGGACAGGAGACAGCATACTTTCTGCTAAAATTAGCAGGAAGATGGCCAGTAAAAGTAGTACACACAGACAATGGCAGCAACTTCACCAGCGCTGCATTTAAAGCAGCCTGTTGGTGGGCAAATGTCCAACAAGAATATGGAATTCCCTACAATCCCCAAAGTCAAGGAGTAGTGGAATCTATGAATAAGGAATTAAAGAAAATCATAGGGCAGGTAAGGGACCAAGCTGAACACCTCAAGACAGCAGTACAAATGGCAGTATTCATTCACAATTTTAAAAGAAAAGGGGGGATTGGGGGGTACAGTGCAGGGGAAAGAATAATAGACATAATAGCATCAGACATACAAACCAAAGAACTACAAAAACAAATTACAAAAATTCAAAATTTTCGGGTTTATTACAGGGACAGCAGAGATCCACTTTGGAAAGGACCAGCAAAACTACTCTGGAAAGGTGAAGGGGCAGTAGTAATACAGGACAATAGTGATATAAAGGTAGTACCAAGGAGAAAAGCAAAGATTATCAGGGACTATGGAAAACAGATGGCAGGTGATGATTGTGTGGCAGGTAGACAGGATGAGGATTAGAACATGGAACAGTTTAGTAAAACATCATATGTATATTTCAAAGAAAGCTAAAGGTTGGTTTTATAGACATCACTATGAAAGCAGGCATCCAAAAGTAAGTTCAGAAGTACACATCCCACTAGGGGATGCTAAATTAGTAGTAAGGACATATTGGGGTCTGCATCCAGGAGAAAAAGATTGGCACTTGGGTCATGGGGTCTCCATAGAATGGAGGCTAAAAAGATATAGCACACAAGTAGATCCTGAACTGGCAGACCAACTAATTCATCTGCATTATTTTAACTGTTTTTCAGAATCTGCCATAAGGAAAGCCATATTAGGACAAGTAGTTAGCCCTAGTTGTGAATATCAAGCAGGACATAACAAGGTAGGATCTCTACAATATTTGGCACTGAAAGCATTAGTAACACCAAAGAAGACAAAGCCACCTTTGCCTAGTGTTAAGAAACTAGCAGAGGATAGATGGAACAAGCCCCAGAAGATCAGGGGCCACAGAGAGAGCCATACAATGAATGGACATTAGAATTGTTAGAAGAGCTTAAAAATGAAGCTGTTAGACATTTTCCTGGGCCATGGCTTCATGGATTAGGACAATATATCTATCACACCTATGGGGATACTTGGGAAGGAGTTGAAGCTATGCTAAGAATTTTGCAACAACTACTGTTTGTTCATTTCAGAATTGGGTGCACACATAGCAGAATAGGCATTATTCCCAGGAGAAGAGCCAGGGATGGATCCGGTAGATCCTAACCTAGCGCCCTGGCAACACCCGGGAAGTCAGCCTACAACTCCTTGTAACAAGTGTTTCTGTAAAAAGTGTTGCTATCATTGTCCAGTTTGCTTGCTGAACAAAGGCTTAGGCATCTCCTATGGCAGGAAGAAGCGGAGACAGCGACGAGGAACTCCTCAAAGCAATAAGGATCATCAAAATCCTATACCAAAGCAGTAAGTACTTAGTAACTAATATATGTAATGTTGTCTGCTTTAGAAATCTGTGCAATTGCAGGACTGGTAATAGCTTTAATCATAGCAATAGTTGTGTGGACTATAGTAGGTATAGAATATAGGAGATTGTTAAAACAAAGAAAAATAGACAGGTTAATTGAGAGAATAAGAGAAAGAGCAGAAGACAGTGGCAATGAGAGTGATGGGGACACAGAGGAATTGGCAGCCCTTATTGAGATGGGGAACTATGATCTTGGGGATGCTAATGATCTGTAGTGCTGCAGACAACTTGTGGGTTACTGTCTATTATGGGGTACCTGTGTGGAAAGATGCAGAGACCACCTTATTTTGTGCATCAGATGCTAAAGCATATGAGACAGAAAAACATAATGTCTGGGCTACACATGCCTGTGTACCCACAGACCCCAGCCCACAAGAAATACCTTTGAAAAATGTGACAGAAAAGTTTAACATGTGGAAAAATAACATGGTAGAACAGATGCATACAGATATAATCAGTCTATGGGACCAAAGCCTAAAGCCATGTGTACAGTTAACCCCTCTCTGCGTCACTCTAAATTGTAGTGACGTCACCACCAATAACACCAAGGTCAATACCACCAGTGCCCCTACCACCGCTGCCACTGTCAACAATGACAGTGACATGAAAAACTGTTCTTACAATATGACCACAGAACTAAGGGATAAGAAACAGAAAATGTATTCACTCTTTTATAGACTTGATGTAGAACTAATAAATAAGAATAATAGTAATAGCACTGAGTATGTATTAATAAATTGTAAAACCTCAACCCTTACACAGGCTTGTCCAAAGGTATCCTTTGAGCCAATTCCCATACATTATTGTGCTCCAGCTGGTTTTGCGATTCTAATGTGTAAGGATAAGGAGTTCAATGGAACAGGGCTATGCAAGAATGTCAGCACAGTACAATGCACACATGGAATCAAGCCAGTAGTGTCTACTCAACTACTATTAAATGGCAGTTTAGCGGAAAAAAGGGTAATGATTAGATCTGCAAATATCACAGACAATACCAAAAACATAATAGTACAACTTAAGGATCCTGTAGAAATTAATTGTACCAGACCTAACAACAATACAAGAAGAGGTGTACATATAGGGCTAGGGAGAAGATTCTATACAACACAGGTAGTAGGGGATATAAGACAAGCATATTGTAATGTCAGTAAATCAAAATGGGATGATACTTTGAAAAAAGTAGTTTACCAATTAAGAAAATACTTTAACAAAACAATAATCTTTAACTCCTCCTCAGGAGGGGATGTAGAAATTACAACACATATGTTTACTTGTGGAGGAGAGTTTTTCTATTGTAATACATCAGGCCTGTTCAATAGCACTTGGCCTGTCAATCAGGAGTCAAATAGCACAAAGTCAAATGGCATTATAACTCTCCGATGCAGAATAAAGCAAATCATAAATATGTGGCAGAGAACAGGACAAGCAATGTATGCCCCTCCCATTCAAGGAATAATAAAGTGTGTATCAAACATTACAGGACTACTGTTAACAAGAGATGGTGGGAATAGTACTGTCAATGAAACTTTCAGACCTGGAGGAGGAGATATGAGGGACAATTGGAGAAGTGAATTATATAAGTATAAAGTAGTAAAAATTGAACCACTAGGAGTAGCACCCACCAAGGCAAGGAGAAGAGTGGTGGGAAGAGAAAAAAGAGCAGTTGGAATAGGAGCTGTTTTCCTTGGGTTCTTAGGAGCAGCTGGCAGCACTATGGGCGCGGCGTCAATAACGCTGACGGTACAGGCCAGACAATTACTGTCTGGCATAGTGCAACAGCAAAACAATTTGCTGAGGGCTATAGAGGCTCAACAACAACTGTTGAAACTCACGGTCTGGGGCATTAAACAGCTCCAGGCAAGAGTCCTGGCTGTGGAAAGATACCTAAGGGATCAACAGCTCCTAGGAATTTGGGGCTGCTCTGGAAAACTCATCTGCACCACTAATGTGCCTTGGAACTCCAGTTGGAGTAATAAGTCTCAGAGTGAGATATGGGACAACATGACCTGGCTGCAATGGGATAGAGAAATTAACAATTATACAGACATAATATATAGACTACTTGAAGATTCGCAAAACCAGCAGGAAAAGAATGAACAAGACTTATTGGCATTGGACAAGTGGGCAAGCCTGTGGACTTGGTTTGACCTATCAAACTGGCTGTGGTACATAAAAATATTTATAATGATAGTAGGAGGTTTAATAGGATTAAGAATAGTTTTTGCTGTGCTTGCTGTAATAAATAGAGTTAGGCAGGGATACTCACCTTTGTCGTTCCAGACCCTTACCCCAAACCCAAGGGAACTCGACAGGCCCGGAAGAATCGAAGAAGAAGGTGGAGAGCAAGACAGAGGCAGATCGATTCGCTTAGTGAGCGGATTCTTAGCACTTGCCTGGGACGACCTGCGGAGCCTGTGCCTCTTCAGCTACCACCACTTGAGAGACTTCATCTTGATTGCAGCGAGGATTGTGGGACTTCTGGGACGCAGGGGGTGGGAAGGCCTCAAGTATCTGTGGAATCTCCTGATATATTGGGGTCAGGAACTAAAAACTAGTGCTGTTAGCTTGCTTGATACCACAGCAATAGTAGTAGCTGGCTGGACAGATAGGGTTCTAGAAATAGGACAAAGAATTGGTAGGGCTTTTATCAACATACCTAGAAGAATTAGACAGGGTTTTGAAAGGGCTTTGCTGTAACATGGGTGGCAAGTGGTCAAAAAGTAGCATAGTGGGATGGCCTCAGATTAGGGAAAGAATAAGACGTACTCCACCAGCAGCACCAGGAGTAGGAGCAGTATCTCAAGATTTAGATAAACATGGAGCAATTACAAGTAGTAATGTAAATCACCCTAGTTGCACCTGGGTGGAAGCACAAGAGGAAGAGGAGGTAGGCTTTCCAGTCCGGCCACAAGTACCACTAAGGCCAATGACTTACAAAGCAGCTCTGGATCTCAGCCACTTTTTAAAAGAAAAGGGGGGACTGGAAGGGTTAATTTACTCCAGGAAAAGACAGGAAATCCTTGATTTGTGGGTCTACCACACACAAGGCTTTTTCCCTGATTGGCATAATTACACACCAGGGCCAGGAATTAGGTTCCCACTAACATTTGGATGGTGCTTCAAGCTGGTGCCAGTTGATCCAGATGAAGTAGAAAGAGCTACTGAGGGAGAGAACAACAGCCTGTTACACCCGATATGTCAACATGGAATGGATGATGAAGAGAGAGAAGTATTAAAGTGGCAGTTTGACAGCCGCCTGGCATTTACACACCAAGCCAGAGAGATACATCCGGAGTACTACAAAGACTGCTGACACAGAAGTTGCTGACTGGGGACTTTCCACTGGGGACTTTCCAGGGGAGGTGTGGTTTGGGCGGAGTTGGGGAGTGGCTAACCCTCAGAAGCTGCATATAAGCAGCCGCTTTTCGCTTGTACTGGGTCTCTCTTGTTAGACCAGGTCGAGCCCGGGAGCTCTCTGGCTAGCGAGGGAACCCACTGCT
>A1.UG.98.98UG57142_AF484512_G.SE.93.SE6165_AF061642
GCGAGAGCGTCAGTATTAAGCGGGGGGAAATTAGATGCATGGGAGAAAATTCGGTTAAGGCCAGGGGGAAACAAAAGATATAGATTAAAACATCTAGTATGGGCAAGCAGGGAGCTGGAAAGATTTGCAGTTAACCCTGGTCTTTTAGAAACAGCAGAAGGATGTAAACAAATAATTGAACAGTTACAACCAGCTCTCGGTACAGGGACGGAAGAACTTAGATCATTATATAATACAATAGTAGTCCTCTATTGCGTACATCAAAGGATAGATGTAAAAGACACCAAGGAAGCTCTAGATAAAATAGAGGAAATGCAGAAAAAGAGCAAGCAAAGGACACAACAAGCAGCAGCTGATACAGGAAACAGCAGCAGTGTCAGCAGCAGTGTCAGTCAAAATTACCCTATAGTGCAAAATGCACAAGGGCAAATGATATACAACCCCTTGTCACCTAGAACTTTGAATGCATGGGTGAAAGTAATAGAAGAAAAGGGTTTCAACCCAGAAGTAATACCCATGTTCTCAGCATTATCAGAAGGAGCCACCCCACAAGATTTAAATATGATGCTGAACATAGTGGGGGGACACCAGGCAGCTATGCAAATGTTAAAAGATACCATCAATGAGGAAGCTGCAGAATGGGATAGGGTACATCCAGTACATGCAGGGCCTGTTCCACCAGGCCAGATGAGAGAACCCAGGGGAAGTGACATAGCAGGAACTACTAGTACCACTCAAGAACAGATAGGCTGGATGACAGGCAACCCACCTATCCCAGTGGGAGACATCTATAAAAGATGGATAATCCTGGGATTAAATAAAATAGTAAGAATGTATAGCCCTGTTAGCATTTTGGATGTGAGACAAGGACCAAAAGAACCCTTCAGAGATTATGTAGACAGATTCTTTAAAATTCTCAGAGCTGAACAAGCTACACAGGAGGTAAAAGGTTGGATGACAGAAACATTACTGGTCCAGAATGCAAACCCAGATTGTAAGACCATTCTAAGAGCACTAGGAACAGGGGCTACATTAGAAGAAATGATGACAGCATGTCAGGGAGTGGGAGGACCCAGCCATAAGGCAAGGGTTTTGGCTGAGGCAATGAGTCAGGCACAAAATACAAACATAATGATGCAGAGAGGTAATTTTAGAGGCCAAAAAAGGATTAAGTGTTTCAATTGTGGCAAAGAAGGACACCTAGCCAGAAATTGCAGGGCCCCTAGGAAAAAGGGCTGTTGGAAATGTGGGAAGGATGGACACCAAATGAAGGACTGCACTGAAAGACAGGCTAATTTTTTAGGGAAAATCTGGCCTTCCAACAAGGGGAGGCCAGGAAACTTTCCTCAGAGCAGACCGGAGCCAACAGCCCCACCAGCAGAGATCTTGGGGATGGGGGAAGAGATAGCCTCCCATCCGAGGCAGGAGCAGAGAGACAGGGAGCAGAACCCACCTTTAGTTTCCCTCAAATCACTCTTTGGCAACGACCCGTTGTCACAGTAAAAATAGGGGGACAGCTAAAAGAAGCTCTATTAGATACAGGAGCAGATGACACAGTATTAGAAGACATAAATTTGCCAGGAAAATGGAAACCAAGAATGATAGGGGGAATTGGAGGTTTCATCAAAGTAAAACAGTATGATCAGATACCCATAGAAATTTGTGGAAAAAAGGCTATAGGTACAGTATTAGTAGGACCTACACCTGTCAACATAATTGGAAGAAATATGTTGACCCAGATTGGTTGTACTTTAAATTTTCCAATTAGTCCTATTGAAACTGTACCAGTAAAATTAAAGCCAGGAATGGATGGCCCCAAGGTTAAACAATGGCCATTGACAGAAGAGAAAATAAAAGCATTAACAGAAATTTGTACAGAAATGGAAAAGGAAGGAAAAATTTCAAAAATAGGGCCTGAAAATCCATACAATACTCCAATATTTGCAATAAAGAAAGAAGACAGCACTAAATGGAGGAAATTAGTAGATTTTAGAGAGCTCAATAAAAGAACACAAGACTTTTGGGAAGTTCAATTGGGAATACCGCATCCAGCGGGCCTAAAAAAGAAAAAATCAGTAACAGTACTGGATGTGGGGGATGCATATTTTTCAGTTCCTTTACATGAGGACTTTAGAAAATATACTGCATTCACCATACCTAGTACAAACAATGAGACACCAGGAATCAGGTATCAGTACAATGTGCTTCCACAGGGATGGAAAGGATCACCAGCAATATTTCAGAGTAGCATGACAAAAATCTTAGAGCCCTTTAGAGCAAAAAATCCAGAAATAATTATCTATCAATACATGGATGACTTGTATGTAGGATCTGATTTAGAAATAGGGCAACATAGAACAAAAATAGAAGAATTAAGAGCTCATCTATTGAGCTGGGGATTTACTACACCAGACAAAAAGCATCAGAAAGAACCTCCATTCCTTTGGATGGGATATGAGCTCCATCCTGACAAGTGGACAGTCCAGCCTATAATACTGCCAGAAAAAGAAAGCTGGACTGTCAATGATATACAAAAATTAGTGGGAAAACTAAATTGGGCAAGTCAAATTTATCCAGGGATTAAAGTAAAGCAATTGTGTAGACTCCTCAGAGGAGCCAAAGCACTAACAGATGTAGTACCTTTGACTGAGGAAGCAGAATTAGAATTGGCAGAGAACAGGGAAATTCTAAAAGACCCTGTGCATGGAGTATATTATGACCCATCAAAAGACTTAATAGCAGAAATACAGAAACAAGGGCAAGACCAGTGGACATACCAAATTTATCAAGAGCCATTTAAAAATCTAAAAACAGGAAAATATGCAAGAAAAAGGTCTGCCCACACTAATGATGTAAGACAATTAACAGAAGTGGTGCAAAAGGTGGTCATAGAAAGTATAGTAATATGGGGAAAGACTCCTAGATTTAAACTACCCATACAAAAAGAGACATGGGAAACATGGTGGATGGACTATTGGCAGGCTACCTGGATTCCTGAATGGGAGTTTGTCAATACCCCTCCTCTAGTAAAATTATGGTACCAATTAGAAAAAGACCCCATAGCAGGAGCAGAGACTTTCTATGTAGATGGGGCAGCCAATAGGGAGACTAGGCTAGGAAAAGCAGGGTATGTCACTGACAGAGGAAGACAAAAGGTCATTACCCTAACTGAAACAACAAATCAAAAGACTGAACTACATGCAATCTATCTAGCCTTGCAGGATTCAGGATCAGAAGTAAACATAGTAACAGACTCACAGTATGCATTAGGAATCATTCAGGCACAACCAGACAGGAGTGAATCAGAGATAGTCAACCAAATAATAGAGAAGCTCATAGGAAAGGACAAAGTCTACCTGTCATGGGTACCAGCACACAAAGGAATTGGAGGAAATGAACAAGTAGATAAATTAGTCAGTTCTGGAATCAGGAAGGTGCTATTTTAGATGGGATAGATAAAGCTCAAGAAGAACATGAAAAATATCACAGCAATTGGAGAACAATGGTTAGTGATTTTAATCTGCCACCTATAGTAGCAAAGGAAATAGTAGCCAGCTGTGATAAATGTCAGCTAAAAGGGGAAGCCATGCATGGACAAGTAGACTGCAGTCCAGGGATATGGCAATTAGATTGCACACATCTAGAAGGAAAAGTAATTATGGTAGCAGTTCATGTAGCCAGTGGCTATATAGAAGCAGAAGTTATCCCAGCAGAAACAGGACAAGAAACAGCATATTTTCTACTAAAATTAGCAGGAAGATGGCCAGTAAAAGTAGTACACACAGACAATGGCAGCAATTTCACCAGCGCTGCAGTAAAAGCAGCCTGTTGGTGGGCAAATATCCAACAGGAATTTGGGATTCCCTACAATCCCCAAAGTCAAGGAGTAGTAGAATCTATGAATAAGGAATTAAAGAAAATCATAGGGCAGGTAAGAGAGCAAGCTGAACACCTTAAAACAGCAGTACAAATGGCAGTATTCATTCACAATTTTAAAAGAAAAGGGGGGATTGGGGGGTACAGTGCAGGGGAAAGAATAATAGACATAATAGCAACAGACATACAAACTAAAGAACTACAAAAACAAATTACAAAAATTCAAAATTTTCGGGTTTATTACAGGGACAGCAGAGATCCAATTTGGAAAGGACCAGCAAAACTACTCTGGAAAGGTGAAGGGGCAGTGGTAATACAGGACAATAGTGATATAAAAGTAGTACCAAGAAGAAAAGCAAAGATCATCAGGGATTATGGAAAACAGATGGCAGGTGATGATTGTGTGGCAGGTAGACAGGATGAGGATTAGAACATGGAACAGTTTAGTAAAATATCATATGTATAAATCAAAGAAAGCTAAAGATTGGTTTTATAGACATCACTATGAAAGCAGGCATCCAAAAGTAAGTTCAGAAGTACACATCCCACTAGGGGATGCTAGATTAGTAGTAAGAACATATTGGGGTCTGCATACAGGAGAAAAAGATTGGCAATTGGGTCATGGGGTCTCCATAGAATGGAGGCTAAGAAGATATAGCACACAAATAGATCCTGACCTGGCAGACCAACTAATTCATCTGCATTATTTTGACTGTTTTTCAGACTCTGCCATAAGGAAAGCCATATTAGGACAAGTAGTTAGCCCTAGATGTGAATATCAAACAGGACACAACAAGGTAGGATCTCTACAATATTTAGCACTAAAAGCATTAGTAACACCAAAAAAGATAAGGCCACCTTTGCCTAGTGTTAGGATATTAACAGAGGATAGATGGAACAAGCCCCAGAAGACCAGGGGCCCCAGAGGGAGCCATACAATGAATGGGTGTTAGAGCTGTTAGAAGATCTGAAGCAAGAAGCCGTCAGACATTTTCCTAGGATATGGCTTCATGAATTGGGACAACAGATCTATAACACCTATGGGGATACTTGGGAAGGAGTTGAAGCTATAATAAGAACTCTGCAACAACTACTGTTTGTTCATTTCAGAATTGGGTGCCAACATAGCAGAATAGGCATTATTCGAGGGAGAAGAGGCAGGAATGGATCCAGTAGATCCTAACCTAGAGCCCTGGAACCATCCGGGAAGCCAGCCTACAACTGCTTGTAACAAATGTTACTGTAAAAAGTGTTGCTACCATTGTCAAATGTGCTTTTTGAACAAAGGCTTAGGCATTTCCTATGGCAGGAAGAAGCGGAGACAGCGACGAAGAACTCATCAAAGCAGTAAGGATCATCAAAATCCTATACCAAAGCAGTAAGTATTATGTAATGACTCCTTTAGAAATTAGTGCAATAGTAGGACTAATAGTAGCTCTAATCTTAGCAATAGTTGTATGGACTATAGTAGGTATAGAATGTATGAAAGTGCTAAAACAAAGAAAAATAGACAGGTTAATTAAAAGAATAAGAGAAAGAGCAGAAGACAGTGGCAATGAGAGTGATGGGGATACAGAGGAATTGTCAGCACTTATTGAGATGGGGGATTATGATCTTGGGGATAACAATGATCTGTGGTAGTACAGATAACTTGTGGGTTACTGTCTACTATGGGGTACCTGTGTGGAAAGATGCAGAGACCACCCTCTTTTGTGCATCAGATGCTAAAGCATATGAGAGAGAGGTGCATAATGTCTGGGCTACACATGCTTGTGTACCCACAGACCCCAACCCACAAGAAGTACATTTGAAAAATGTGACAGAACAATTTAATATGTGGAAAAATAACATGGTAGAGCAGATGCATACAGATATAATCAGTCTATGGGATGAAAGCCTAAAGCCATGTGTAAAGTTAACCCCTCTCTGTGTTACTTTAAAGTGTAGCAATATCAGCAATATCAACAGCACGAGGGGCAGCACAGAGGGCAACAGCACGTTAGAAAACAGGGAAGAAATAAAAAACTGCTCTTTCAATATGACCACAGAACTAAGGGATAAGAAACAAAAAGTACATGCACTTTTTTATAGACTTGATATAGTAGAAATAGATGACAAGAAGAGTAATGGTAGTAACAATGAGTATAGATTAATAAATTGTAATACCTCAACCATTACACAGGCTTGTCCAAAGGTATCCTTTGAGCCAATTCCCATACATTATTGTGCCCCAGCTGGTTTTGCGATCCTAAAGTGTAATGATAAGAGGTTCAATGGAACAGGGCCATGCAAGAATGTCAGCACAGTACAATGCACACATGGAATCAGGCCAGTAGTATCAACTCAACTGCTGTTAAATGGCAGTCTAGCAGAAGAAGAGATAAGAATTAGTTCTGAAAATATCACAGACAATGCCAAAACCATAATAGTACAATTTATCAAGCCTGTAAACATTACTTGTGTCTGACCTAACAACAATACAAGGACAAGCATACGTATAGGACCAGGACAAACATTCTATACAACAGGTGATATAATAGGAAATATAAGACAAGCACATTGTAATGTCAGCAGATCAGAATGGAATGATAACTTAAAAGAGGTAGCTACACGATTAAAAGAATACTTTAATAAAACACAAACAATAATCTTTACTAATTCCTCAGGAGGGGATCTAGAAATCACAACACATAGTTTTAATTGTGGAGGAGAATTTTTCTATTGTGATACAACAGGACTGTTTAATAGCAATTGGACTTGGAATGACACTGCCAGCATAATGGAGTCAAATAGCATGGAGTCAACTCAAAATATAACACTCCAATGCAGAATAAAGCAGATTATAAATATGTGGCAGAGAGCAGGTAAAGCAATGTATGCCCCTCCCATCCAAGGAACAATAAGGTGTGAATCAAACATTACAGGACTACTGTTAACAAGAGATGGTGGGGATAATAGAGATAATAGAACTGAAACCTTCAGACCTGGAGGAGGAGATATGAGGGATAATTGGAGAAGTGAATTATATAAGTATAAAGTAGTCAAAATTGAACCACTAGGAGTAGCACGCACCAGGGCAAAGAGAAGAGTGGTGGAGAGAGAAAAAAGAGCAGTTGGAATAGGAGCTGTCTTCCTTGGGTTCTTAGGAGCAGCAGGAAGCACTATGGGCGCGGCGTCAATAACGCTGACGGTACAGGCCAGACTATTATTGTCTGGTATAGTGCAACAGCAAAGCAATTTGCTGAGGGCTATAGAGGCTCAACAACATTTGTTGAAGCTCACGGTCTGGGGCATTAAACAGCTCCAGGCACGAGTCCTGGCTCTGGAGAGATACCTAAAGGATCAACAGCTCCTAGGAATTTGGGGCTGCTCTGGAAAACTCATCTGCACCACTAATGTGCCCTGGAACTCTAGTTGGAGTAATAGATCTTACAATGAAATATGGGATAACATGGCCTGGCTGCAATGGGATAGAGAAATTAACAATTACACAGACATAATATATAAATTAATTGAAGAATCGCAGAACCAGCAGGAAAAGAATGAACAAGATTTATTGGCATTGGACAAGTGGGCAAATCTGTGGAATTGGTTTGGCATATCAAATTGGCTGTGGTATATAAAAATATTTATAATGATAGTAGGAGGCTTAATAGGATTAAGAATAGTGTTTACTGTGCTTTCTATAATAAATAGGGTTAGGCAGGGATACTCACCTTTGTCGTTTCAGACCCATACCCCAAACCCAGGGGAACTCGACAGGCCCGGAAGAATCGAAGAAGAAGGTGGAGAGCAAGGCAGAGGCAGATCGACGCGCTTAGTGAGCGGATTCTTAGCACTTGCCTGGGACGACCTGCGGAGCCTGTTCCTCTTCAGCTACCACCGCTTGAGAGACTCCATCTTGATTGTAGCGAGGACAGTGGAACTTCTGGGACGCAGCAGCCTCAAGGGACTGAGACTGGGGTGGGAAGGTCTTAAATATTTGTGGAATCTTCTGTTGTATTGGGGCAGGGAACTAAAGAATAGTGCTATTAGTTTGCTTGATACCACAGCAATAGCAGTAGCTGGCTGGACAGATAGGGTTATAGAAATAGGACAAAGAATTGGTAGAGCTATTCTCCACATACCTAGAAGAATCAGACAGGGCTTCGAAAGAGCTTTGCTATAACATGGGTGGCAAGTGGTCAAAAAGTAGCATAGTGGGATGGCCAGAGATTAGAGAAAGAATGAGACGTAGTGGTACCCCTTCAGCAGCAACAGGAGTAGGAGCAGTATCTCAAGATCTGGATAAATATGGAGCAATTACAAGTAGTAATATAAATCACCCTAGTTGTGTCTGGGTGGAAGCACAAGAAGAAGAGGAGGTAGGCTTCCCAGTCAGGCCACAAGTACCTCTAAGACCAATGACTTACAAGGGAGCTCTGGATCTTAGCCACTTTTTAAAAGAAAAGGGGGGACTGGATGGGTTAATTTACTCCAGGAAAAGACAAGAAATCCTTGATCTGTGGGTCTACAACACACAAGGCTATTTCCCTGATTGGCAGAATTACACACCAGGGCCAGGGATTAGATTCCCACTAACATTTGGATGGTGCTTCAAGCTAGTACCAGCTGATCCAGAGGACGTAGAGAAGGCTACTGAAGGAGAGAACAACAGCCTGCTACACCCTATATGCCAACATGGAATGGATGACGAGGAGAGAGAAGTATTAATGTGGAAGTTTGACAGCACCCTGGCACTAAAACACAGAGCCCAAGAGCTGCATCCGGAGTACTACAAGGATTGCTGACACAGAAGTTGCTGACAGGGACTTTCCGCTGGGGACTTTCCAGGGGAGGTGTGGTTTGGGCGGAGTTGGGGAGTGGCTAACCCTCAGATGCTGCATATAAGCAGCTGCTTTTCGCCTGTACTGGGTCTCTCTTGTTAGACCAGATTGAGCCCGGGAGCTCTCTGACTAGCGAGGGAACCCACTGCT
>A1.KE.00.MSA4070_AF457081_H.CF.90.056_AF005496
GCGAGAGCGTCAGTATTAAGCGGGGGAAAATTAGATGCATGGGAGAAAATTCAGCTAAGGCCAGGGGGAAAGAAAAAATATAGACTAAAACATCTAGTATGGGCAAGCAGGGAGCTGGAAAGATTCGCACTTAACCCTGACCTTTTAGAAACATCAGAAGGATGTCAACAGATAATAGAACAGTTACAACCAGCTCTTAAAACAGGAACAGAAGAACTTAGATCATTATTTAATCTAGTAGCAGTCCTCTTTTGCGTACATCAACAGATAAAGGTAAAAGACACCAAGGAAGCTCTAGATAAAATAGAGGAAATACAAAATAAGAGCAAGCAAAAGACACAGCAGGCAGCAGCTGACACAGGAAACAGCAGCAAAGTCAGCCAAAATTACCCTATAGTGCAAAATACACAAGGGCAAATGGTTTATCAGTCAGTATCACCTAGGATTTTGAATGCATGGGTGAAGGTAATAGAAGAAAAGGCTTTCAGCCCAGAAGTAATACCCATGTTCTCAGCATTATCAGAAGGAGCTACCCCACAAGATTTAAATATGATGCTGAATATAGTGGGGGGACACCAGGCAGCTATGCAAATGTTAAAAGATACCATCAATGAGGAAGCTGCAGAATGGGACAGGTTACATCCAGTGCATGCAGGGCCTATTCCACCAGGCCAAATGAGAGAACCAAGGGGAAGCGATATAGCAGGAACTACTAGTACCCTGCAGGAACAAATAGCATGGATGACAGGCAATCCAGCTATCCCAGTGGGAGACATCTATAAAAGATGGATAATCCTGGGATTAAATAAAATAGTAAGAATGTATAGCCCTGTTAGCATTTTGGATATAAAACAAGGGCCAAAAGAACCCTTCAGAGACTATGTAGATAGGTTCTTTAAAACTCTCAGAGCTGAGCAAGCTACACAGGAGGTAAAAGGTTGGATGACAGAAACCTTGCTGGTCCAAAATGCAAATCCAGATTGTAAATCCATTTTAAGAGCATTAGGAACAGGGGCTACATTAGAAGAAATGATGACAGCATGTCAGGGAGTGGGAGGACCCAGCCATAAAGCAAGGGTTCTGGCTGAGGCAATGAGTCAAATAAACCAGCCAAACATCATGATGCAGAGAGGCAATTTTAGAGGCCAGAAAAGAATTAAGTGTTTCAACTGTGGCAAAGAGGGACACCTAGCCAGAAATTGCAGGGCCCCTAGGAAAAAGGGCTGTTGGAAATGTGGGAAGGAGGGACACCAAATGAAAGATTGCACTGAGAGACAGGCTAATTTTTTAGGGAAAATTTGGCCTTCCAGCAAGGGGAGGCCAGGAAATTTTCCTCAGAGCAGACCAGAGCCAACAGCCCCACCAGCAGAGATCTTTGGGATGGGGGAAGAGGTAGCCCCCCTTCCGAAGCAGGAGCAGAAAGACAGGGAACAGGCCCCACCTGTAGTTTCCCTCAAATCACTCTTTGGCAACGACCTCTTGTCACAGTAAAAATAGGAGGACAGCTAAAAGAAGCTCTATTAGATACAGGAGCAGATGATACAGTATTAGAAGATATAAATTTACCAGGAAAATGGAAACCAAGAATGATAGGGGGAATTGGAGGTTTTATCAAGGTAAAACAGTATGATCAGATACTCATAGAAATTTGTGGAAAAAAGGCCATAGGTACAGTATTAGTAGGACCTACACCTGTCAACATAATTGGAAGAAACATGTTGACCCAGATTGGTTGTACTTTAAATTTTCCAATTAGTCCTATTGAGACTGTACCGGTAACATTAAAACCAGGGATGGATGGACCAAAAGTTAAACAATGGCCATTGACAGAAGAAAAAATAAAAGCATTAACAGAAATTTGTACAGAGATGGAAAAGGAAGGGAAAATTTCAAAAATTGGGCCTGAAAATCCATACAATACTCCAATATTTGCTATAAAGAAAAAAGACAGCACTAAATGGAGGAAATTAGTAGATTTCAGAGAACTCAATAAAAGAACTCAGGACTTCTGGGAAGTTCAATTAGGAATACCACATCCAGCAGGTTTAAAAAAGAAAAAATCAGTGACAGTACTGGATGTGGGGGATGCATATTTTTCAGTTCCTTTAGATGAAAACTTTAGAAAATATACTGCATTCACCATACCTAGTACAAACAATGAGACACCAGGAGTCAGGTATCAGTACAATGTGCTTCCACAGGGATGGAAAGGATCACCGGCAATCTTCCAAAGTAGCATGACAAAAATCTTAGAGCCCTTTAGATCAAAAAATCCAGAAATAATTATCTATCAATATATGGATGACCTATATGTAGGATCTGATTTAGAAATAGGGCAGCATAGAACAAAAATAGAAGAATTAAGAGCTCATCTATTGAGCTGGGGATTTACTACACCAGACAAAAAGCATCAGAAGGAACCTCCATTCCTTTGGATGGGATATGAGCTCCATCCTGACAAGTGGACAGTCCAGCCTATAATGCTGCCAGACAAAGAAAGCTGGACTGTCAATGATATACAGAAATTAGTGGGAAAACTAAATTGGGCAAGTCAGATTTATGCAGGAATTAAAGTAAAGCAATTGTGTAGACTCCTCAGAGGAGCCAAAGCACTAACAGATATAGTAACATTGACTGAAGAAGCAGAGTTAGAATTGGCAGAGAACAGGGAGATTCTAAAAGACCCTGTGCATGGAGTATATTATGACCCATCAAAAGACTTAGTAGCAGAAATACAGAAACAAGGGCAAGACCAATGGACATACCAAATTTATCAAGAGCCATTTAAAAACCTAAAAACAGGGAAATATGCAAGAAAAAGGTCTGCTCATACTAATGATGTAAGACAGTTAGCAGAAGTGGTGCAAAAGGTGGCCATGGAAAGCATAGTAATATGGGGAAAGACTCCTAAATTTAAACTACCCATACAAAAAGAAACATGGGAAACATGGTGGATGGACTACTGGCAGGCTACCTGGATTCCTGAATGGGAGTTTGTCAATACCCCTCCCCTAGTAAAATTATGGTACCAGTTGGAGAAAGACCCTATATTAGGAGCAGAGACTTTCTATGTGGATGGGGCAGCCAATAGGGAAACTAAGCTAGGAAAAGCAGGGTATGTCACTGACAGAGGAAGACAAAAGGTTGTTTCCCTAACTGAGACAACAAATCAAAAGACTGAATTACATGCTATACTTCTAGCCTTGCAGGATTCAGGATCAGAAGTAAATATAGTAACAGACTCACAGTATGCATTAGGAATCATTCAGGCACAACCAGACAGGAGTGAATCAGAGTTAGTCAATCAAATAATAGAGAAGCTAATAGGAAAGGATAAAATCTACCTGTCATGGGTACCAGCACACAAAGGGATTGGAGGAAATGAACAAGTAGATAAACTAGTCAGCTCCGGAATCAGGAAGGTGCTATTTTTAGATGGGATAGATAAGGCTCAAGAAGACCATGAAAGATATCACAGCAATTGGAGAACAATGGCTAGTGATTTTAATCTGCCACCTATAGTAGCAAAAGAAATAGTAGCCAGCTGTGATAAATGTCAACTAAAAGGGGAAGCCATGCATGGACAAGTAGACTGTAGCCCAGGGATATGGCAATTAGATTGCACACATCTAGAAGGGAAAGTAATCCTGGTAGCAGTCCATGTAGCCAGTGGCTATATAGAAGCAGAAGTTATCCCAGCAGAAACAGGGCAAGAGACAGCATACTTTCTGCTAAAATTAGCAGGAAGATGGCCAGTAAAAGTAGTACACACTGACAATGGAAGCAATTTCACCAGTGCTGCAGTTAAAGCAGCCTGTTGGTGGGCAAATATCCAACAGGAATTTGGGATTCCCTACAATCCCCAAAGTCAAGGAGTAGTGGAATCTATGAATAAAGAATTAAAGAAAATCATAGGGCAAGTAAGAGATCAAGCTGAACATCTTAAAACAGCAGTACAAATGGCAGTATTTATTCACAATTTTAAAAGAAAAGGGGGGATTGGGGGGTACAGTGCAGGGGAAAGAATAATAGACATAATAGCAACAGACATACAAACTAAAGAATTACAAAAACAAATTACAAAAATTCAAAATTTTCGGGTTTATTACAGGGACAGCAGAGATCCCATTTGGAAAGGACCAGCAAAACTACTTTGGAAAGGTGAAGGGGCAGTAGTAATACAGGACAACAGTGATATAAAGGTAGTACCAAGAAGAAAAGCAAAGATCCTTAGGGATTATGGAAAACAGATGGCAGGTGATGATTGTGTGGCAGGTAGACAGGATGAGGATTAGAACATGGCACAGTATAGTAAAATATCATATGCATGTCTCAAGGAAAGCTAAAGATTGGTTTTATAGACATCACTATGAAAGCAGGCATCCAAGAGTAAGTTCAGAAGTACACATCCCACTAGGGGATGCTAGAATAGTAGTAAAAACATATTGGGGACTGCATACAGGAGAAAAAGAGTGGCAATTGGGTCATGGGGTCTCCATAGAATGGAGGCTAAAAAGATATAGCACACAAATAGATCCTGACCTGGCAGACCAACTAATTCATCTGCATTATTTTGACTGTTTTTCAGGCTCTGCCATAAGGAAAGCCCTATTAGGACAAGTAGTTAGACCTAGGTGTGAATATCAAACAGGACACAACAAGGTAGGATCTCTACAGTATTTGGCACTGAAAGCATTAGTAAAACCAAAAAAGGAAAAGCCACCTTTGCCAAGTGTTAGGAAATTAACAGAGGATAGATGGAACAAGCCCCAGAGGACCAGGGGCCACAGAGGGAGCCATACAATGAATGGATGTTAGAACTGTTAGAAGATCTTAAAAATGAAGCTGTTAGGCATTTTCCTAGGCCATGGCTTCATGGATTAGGACAACATATCTATGAAACCTATGGGGATACTTGGGAAGGAGTTGAAGCTATAGTAAGAATTTTGCAACAACTACTGTTTATTCATTTCAGAATTGGGTGCCAGCGTAGCAGAATAGGCATTAGTCGAGGGAGAAGAGTCGGGAATGGAACCAGTAGATCCTAACCTAGAGCCCTGGAATCATCCGGGAAGTCAGCCTACAACTGCTTGTAACAAGTGTTATTGTAAAAAGTGTTGCTGGCATTGCCAAGTTTGCTTTCTGAACAAAGGCTTAGGCATCTCCTATGGCAGGAAGAAGCGGAGACAGCGACGAGGAACTCCTCAGAGTGATAAGGACCATCAAAATCCTATACCAAAGCAGTAAGTAATAATAATTAGTACATGTAATGTCTCCTTTGGAAATCTGTGCAATAGTAGGACTGGTAGTAGCGCTAATCATAGTTATAGTTGTGTGGACTATAGTAGGTATAGAATTTAAGAAATTGCTAAAGCAAAGGAAAATAGACAGGCTACTTAAGAGAATAAGAGAAAGAGCAGAAGATAGTGGCAATGAGAGTGATGGGGACCCAGAGGAATTATCAAGACTTGTGGAAGTGGGGGACTATGCTCCTCTTGGGGATGATAATAATTTGTAGTACTGCAGAAAATTTGTGGGTTACTGTTTACTATGGGGTACCTGTGTGGAAAGATGCAGAGACCACCTTATTTTGTGCAACAGATGCTAAAGCAGTAAGTACAGAAGCGCATAATGTCTGGGCTACACATGCCTGTGTACCCACAGACCCCGACCCACAAGAAATATATTTGGAAAATGTGACAGAAAATTTTAACATGTGGAAAAATAACATGGTAGAACAGATGCATACAGATATAATCAGTTTATGGGACCAAAGCCTAAAGCCATGTGTAAAGTTAACCCCTCTCTGTGTTACTTTAAACTGTACAAATGCCAACACCACCACCACGAATGGCACCATCACAAACGGGGAAGAAATAAAAAACTGCTCTTATAATATAACCACAGAACTAAGGGATAAGAGACAGAAAGTATATTCACTTTTTTATAAACTTGATGTAGTACAACTTAATGAGGGTAATAGTAGTAATAATAGTAGCAATAATGAGTATAAGGAGTATAGATTAATAAATTGTAATACCTCAGCCATTACACAAGCTTGTCCAAAGGTATCCTTTGAGCCAATTCCCATACATTATTGTGCACCAGCTGGTTTTGCGATCCTAAAGTGCAAGGATAAGAAGTTCAATGGAACAGGGCCATGCAGGAATGTCAGCACAGTACAGTGCACACATGGAATCAAACCAGTAGTATCAACTCAACTGCTGTTAAATGGCAGCCTAGCAGAAGAAGAGGTAATAATTAGATCTGAAAATATCACAAATAACGCCAAAACCATAATAGTACAATTTACCAAGCCTGTGATAATTAATTGTACCAGACCTAACAACAATACAAGAAAAAGTATACGAATAGGACCAGGACAAGCATTCTATGCAACAGGTGACATAATAGGGGATATAAGACAGGCACATTGTAATGTCAGTAGATCAGACTGGAATGGAACTTTAAGCAATGTAACTGCAGAATTAAGAAAACACTTTGGGAACAAAACAATAATCTTTAATAGCTCCTCAGGGGGGGATTTAGAAATTACAACACATAGTTTTAATTGTGGAGGAGAATTTTTCTATTGTAATACATCAGGCCTGTTTAATAGCACTTGGACAAATGACAGTATCAGCACAAATAGCACAAAGTCAAATGACACTATAACTCTCCCATGCAGAATAAAGCAAATTATAAATATATGGCAGAGAGTGGGACAAGCAATGTATGCCCCTCCCATCCAAGGAGTAATACAGTGTGTATCAAACATTACAGGACTACTATTAACAAGAGATGGTGGGGATAACAGTAGTACGAATGAAACCTTCAGACCTGGAGGAGGAGATATGAGGGACAATTGGAGAAGTGAATTATATAAGTATAAAGTAGTAAAAATTGAACCACTAGGAGTAGCACCCACCAGGGCAAGGAGAAGAGTGGTGGAGAGAGAGAAAAGAGCAGTTGGACTGGGAGCTGTTTTCATTGGGTTCTTGGGAGCAGCAGGGAGCACTATGGGCGCAGCGTCAATAACGCTGACGGTACAGGCCAGACAATTATTGTCTGGCATAGTGCAACAGCAAAGCAATTTGCTGAGGGCTATAGAGGCTCAACAACATCTGTTGAAACTCACGGTCTGGGGCATTAAACAGCTCCAGGCAAGAGTCCTGGCTGTGGAAAGATACCTAAAGGATCAACAGCTCCTAGGAATTTGGGGCTGCTCTGGAAAACTCATCTGCACCACTACTGTGCCCTGGAATTCTAGTTGGAGTAATAAATCTGAGAGTGAGATATGGGAAAACATGACCTGGCTGCAATGGGATAAAGAGATTAGCAATTACACAGACATAATATATAGTCTAATTGAAGAAGCGCAAAACCAGCAGGAAAAAAATGAACAAGACTTATTGTCATTGGACAGTTGGGCAACTCTATGGAATTGGTTTGACATAACAAGGTGGCTGTGGTATATAAAAATATTTATAATAATAGTAGGAGGCTTAATAGGACTAAGAATAGTTTCTACTATACTTTCTGTAGTAAATAGAGTTAGGCAGGGATACTCACCTTTGTCATTTCAGACCCATACCCCACACCCAAGGGGTCTCGACAGGCCCGGAGGAATCGAAGAAGAAGGTGGAGAGCAAGGCAGAGACAGATCGATTCGATTGGTGAGCGGATTCTTAGCACTTACCTGGGACGATCTCCGGAGCCTGTGCCTCTTCAGCTACCACCGCTTGAGAGACTTCATCTTGATTGCAGCGAGGACTGTGGAACTTCTGGGACACAGCAGTCTCAAGGGGTTGAGACTGGGGTGGGAAGGCCTCAAGTATCTGGGGAATCTCCTGTTATATTGGGGTCGGGAACTAAAGCTTAGTGCTATTAATTTGGTTGATACCATAGCAATAGCAGTAGCTGGCTGGACAGATAGGATTATAGAAATAGCACAAGGAATTGGTAGAGCTATTTTCTACATACCTAGAAGAATCAGACAGGGCTTAGAAAGGGCATTGCTATAACATGGGTGGCAAATGGTCAAAAGGTAGCATAGTGGGATGGCCTGAGATTAGGGAAAGAATGAGACGCGCTCCTGCAGCAGCACCAGGAGTAGGAGCAGTATCTCAAGATTTAGATAAACATGGAGCAATCACAAGTAGTAATATAAATAACCCTAGTTGTGTCTGGCTGGAAGCGCAAGAGGAAGAGGAGGTAGGCTTTCCGGTCAGGCCACAAGTACCTCTAAGACCAATGACTTATAAGGGAGCTTTCGATCTCAGCCACTTTTTAAAAGAAAAGGGGGGACTGGATGGGTTAATTTACTCCAGGAAAAGACAAGAAATCCTTGATCTGTGGGTCTATCACACACAAGGCTACTTCCCTGATTGGCAGAATTACACACCAGGGCCAGGGGTCAGATACCCACTAACATTTGGATGGTGCTTCAAGCTAGTACCAATGGAGCCAGATGAAGTAGAGAAGGCTACTGAGGGAGAGAACAACAGCCTTTTACACCCGATATGCCAACATGGAATGGATGATGAGGAGAGAGAAGTATTAATATGGAAGTTTGACAGCCGCCTAGCACTGAAACACAGAGCCCAAGAGCTACATCCGGAGTTCTACAAAGACTGCTGACACAGAAGTTGCTGACAGGGACTTTCCGCTGGGGACTTTCCAGGGGAGGTGTGGTTTGGGCGGAGTTGGGGAGTGGCTAACCCTCAGATGCTGCATATAAGCAGCTGCTTTTCGCCTGTACTGGGTCTCTCTTGGTAGACCAGATCTGAGCCTGGGAGCTCTCTGGCTATCTAGAGAACCCACTGCT
>A1.UG.92.92UG_029_AY713407_J.SE.94.SE7022_AF082395
GCGAGAGCGTCAGTATTAAGCGGGGGAAAATTAGATGCATGGGAGAAAATTCGGTTAAGGCCAGGGGGAAAGAAAAAATATAGACTAAAACATCTAGTATGGGCAAGCAGGGAGCTGGAAAGATTCGCACTTAACCCTAGCCTTTTAGAAACAACAGAAGGATGTCAACAAATAATAGAACAGTTACAACCAGCTCTCAAGACAGGAACAGAAGAACTTAGATCATTATATAATACAGTAGCAACCCTCTATTGCGTACATCAAAGGATAGATGTAAAAGACACCAAGGAAGCTTTAGATAAAGTAGAGGAAATACAAAATAAAAGCAAACAAAAGACACAACAGGCAGCAGCTGGCACAGGAAACAGCAGCAAAGTCAGCCAAAATTACCCTATAGTGCAAAATGCACAAGGGCAAATGGTATACCAGGCAGTAACACCTAGGACTTTGAATGCATGGGTGAAAGTAATAGAGGAAAGGGCTTTCAGCCCAGAAGTAATACCCATGTTCTCAGCATTGTCAGAAGGAGCCACCCCACAAGATTTGAATATGATGCTGAACATAGTGGGGGGACACCAGGCAGCTATGCAAATGTTAAAAGATACCATTAATGAGGAAGCTGCAGAATGGGACAGGTTACATCCAGCACAGGCAGGGCCTGTTGCACCAGGCCAACTGAGAGACCCAAGGGGAAGTGATATAGCAGGGACTACTAGTACCCCTCAAGAACAAATAGGATGGATGACAGGCAACCCACCTATCCCAGTGGGAGACATCTATAAAAGATGGATAATCCTGGGATTAAATAAAATAGTAAGAATGTATAGCCCTGTTAGCATTTTGGATATAAGACAAGGGCCAAAAGAGCCCTTCAGAGATTATGTAGATAGGTTCTTTAAAACTCTCAGAGCTGAGCAAGCTTCACAGGAGGTAAAAGGTTGGATGACAGAAACATTACTGGTCCAAAATGCAAATCCAGATTGTAAGTCCATTCTAAAAGCATTAGGAACAGGGGCTACATTAGAAGAAATGATGACAGCATGCCAGGGAGTGGGAGGACCCAGCCATAAAGCAAGGATTTTGGCTGAGGCAATGAGTCAAGCACAACATACAAACATAATGATGCAGAGAGGTAATTTTAGAGGCCAGAAAAGGATTAAGTGTTTCAACTGTGGCAAAGAAGGACACCTAGCCAAACATTGCAGGGCCCCTAGGAAAAAGGGCTGTTGGAAATGTGGGAAGGAGGGACACCAAATGAAAGACTGCACTGAAAGACAGGCTAATTTTTTAGGGAAAATTTGGCCTTCCAGCAAGGGGAGGCCAGGAAATTTTCCACAGAGCAGACCGGAGCCAACAGCCCCACCAGCGGAGCTCTTTGGGATGGGGGGAGAGATATCCTTCCCTCCGAAGCAGGAGCAGAAAGACAGGGACCAGGCCTCACCTTTAGTTTCCCTCAAATCACTCTTTGGCAACGACCCCTTGTCACAGTAAAAATAGGGGGACAGCTAAAAGAAGCTCTATTAGATACAGGAGCAGATGATACAGTATTTGAAGACATAAATTTGCCAGGAAAATGGAAACCAAGAATGATAGGGGGAATTGGAGGTTTCATCAAAGTAAAACAGCATGATCAGATACTTATAGAAATTTGTGGAAAAAAGGCTATAGGTACAGTGTTGGTAGGACCTACACCTGTCAACATAATTGGAAGAAATATGTTGACCCAGATTGGTTGTACTTTAAATTTCCCAATTAGTCCTATTGATACTGTACCAGTAAAATTAAAGCCAGGAATGGATGGCCCAAAGGTTAAACAATGGCCATTGACAGAAGAAAAAATAAAAGCATTAACAGAAATTTGTACAGATATGGAAAAGGAAGGAAAAATTTCAAGAATTGGGCCTGAAAATCCATACAATACTCCAATATTTGCTATAAAGAAAAAAGACAGCACTAAATGGAGAAAATTAGTAGATTTCAGAGAGCTCAATAAAAGAACTCAAGACTTTTGGGAAGTTCAATTAGGAATACCGCACCCAGCGGGCTTAAAAAAGAAAAAATCAGTAACAGTACTAGATGTGGGGGACGCATATTTTTCAGTTCCCTTAGATGAAAGCTTTAGAAAGTATACTGCATTCACCATACCTAGTACCAACAATGAGACACCAGGAATCAGGTATCAGTACAATGTGCTTCCACAGGGATGGAAAGGATCACCAGCAATATTCCAGAGTAGCATGACAAAAATTTTAGAGCCCTTCAGATCAAAAAATCCAGAAATAATTATCTATCAGTACATGGATGACTTGTATGTAGGATCTGATTTAGAAATAGGGAAGCATAGAGCAAAAATAGAAGAGCTGAGAGCTCATCTATTGAGCTGGGGGTTTACTACACCAGACAAAAAGCATCAGAAAGAACCTCCATTTCTTTGGATGGGATATGAACTCCATCCTGACAAGTGGACAGTCCAGCCAATAGAGCTGCCAGCAAAAGAAAGCTGGACTGTCAATGATATACAGAAATTAGTGGGAAAACTAAATTGGGCAAGTCAAATTTATGCAGGAATTCAAGTAAAACAATTGTGTAAACTCCTCAGGGGAGCCAAAGCACTAACAGATATAGTAACGTTGACTGAGGAAGCAGAATTAGAATTGGCAGAGAACAGGGAAATTCTAAAAGACCCTGTGCATGGAGTATATTATGACCCATCTAAAGACTTAATAGCAGAAGTGCAGAAACAAGGACTGGACCAATGGACATATCAAATTTATCAGGAGCCATTTAAAAACCTGAAAACAGGGAAATATGCAAAAAGGAGGAGTGCCCACACTAATGATGTAAAGCAATTATCACAAGTGGTGCAAAAAATAGCCATGGAAAGCATAGTAATATGGGGAAAGACTCCTAAATTTAAACTACCCATACAGAAAGAAACATGGGAAACATGGTGGAGGGACTATTGGCAGGCTACCTGGATTCCTGAATGGGAGTTTGTCAATACCCCTCCCCTAGTAAAATTATGGTACCAGCTAGAGAAAGACCCTATAGTAGGAGCAGAAACTTTCTATGTAGATGGGGCAGCTAATAGGGAAACTAAGCAGGGAAAAGCAGGGTACGTCACTGACAGAGGAAGACAAAAAGTTGTTTCCCTAAATGAGACAACAAATCAAAAAACTGAATTACATGCTATCTATCTAGCCTTGCAAGATTCAGGATCAGAAGTAAATATAGTAACAGACTCACAGTATGCATTAGGAATCATTCAGGCACAACCAGACAGGAGTGAATCAGGGTTAGTCAGTCAAATAATAGAGAAGCTAATAGAAAAAGACAAAGTCTACCTATCATGGGTACCAGCACACAAGGGAATCGGAGGAAATGAACAAGTAGATAAATTAGTCAGTTCAGGAATCAGGAAGGTGCTATTTTTAGATGGGATAGATAAGGCTCAAGAAGAACATGAGAGATATCACAGCAATTGGAGAGCAATGGCTAGTGATTTTAATCTGCCACCTGTAATAGCAAAGGAAATAGTGGCCAGCTGTGATAAATGTCAACTAAAAGGAGAAGCCATGCATGGACAAGTAGACTGTAGCCCAGGAATATGGCAATTAGATTGCACACATCTAGAAGGAAAAGTAATCCTGGTAGCAGTCCATGTGGCCAGTGGTTATATAGAAGCAGAAGTTATCCCAGCAGAAACAGGACAGGAGACAGCATACTTTCTGCTAAAATTAGCAGGAAGATGGCCAGTAAAAGTAGTGCACACAGACAATGGCCCCAATTTCACCAGCGCTACAGTTAAAGCAGCTTGCTGGTGGGCAAATATCCAACAGGAATTTGGAATTCCCTACAATCCCCAAAGTCAAGGAGTAGTGGAATCTATGAATAAGGAATTAAAGAAAATCATAGGGCAGGTAAGAGACCAAGCTGAACACCTTAAGACAGCAGTACAAATGGCAGTATTCATTCACAATTTTAAAAGAAAAGGGGGGATTGGGGGGTACAGTGCAGGGGAAAGAATAATAGACATAATAGCAACAGACATACAAACTAAAGAATTACAAAAACAAATTACAAAAATTCAAAAATTTCGGGTCTATTACAGGGACAGCAGAGATCCAATTTGGAAAGGACCAGCAAAACTACTCTGGAAAGGTGAAGGGGCGGTAGTAATACAAGACAACAGTGATATAAAGGTAGTGCCAAGAAGAAAAGCAAAGATCATTAGGGATTATGGAAAACAGATGGCAGGTGATGATTGTGTGGCAGGTAGACAGGATGAGGATTAAAACATGGAACAGTTTAGTAAAACATCATATGTATATCTCAAAGAAAGCTACTGGTTGGTGTTATAGACATCACTATGAAAGCAGACATCCAAAAGTAAGTTCAGAAGTACACATCCCACTAGGGGAAGCTAAAATAGTAGTAAGAACATATTGGGGGCTGCATACAGGAGAAAAAGACTGGCACTTGGGTCATGGGGTCTCCATAGAATGGAGGCTAAAAGGTTATAACACACAATTAGATCCTGACCTGGCAGACCGACTAATTCATCTGCATTATTTTGACTGTTTTTCAGAATCTGCCATAAGGAAAGCCATATTAGGACAAGTAGTTAGCCCTAGTTGTGAATATCAAACAGGACACAACAAGGTAGGATCTCTACAATATTTAGCACTGAAAGCATTAGTAACACCAACAAGAATAAAGCCACCTCTGCCAAGGTTAAGAAATTAGCAGAGGATAGATGGAACAAGCCCCAGAAGACCAGGGGCCCCAGAGAGAGCCATACAATGAATGGATGTTAGAACTGTTAGAAGATCTTAAACATGAAGCTGTTAGGCATTTTCCTAGGCCATGGCTCCATGGATTAGGACAACATATCTATAACACCTATGGGGATACTTGGGAAGGAGTTGAAGCTATAACAAGAATTTTGCAACAACTACTGTTTGTTCATTTCAGAATTGGGTGCCAACATAGCAGAATAGGCATCATTCGAGGGAGAAGAGGCAGGGATGGAGCTGGTAGATCCTAACCTAGAGCCCTGGAACCATCCGGGAAGCCAGCCTACAACTCCTTGTAGCAAGTGTTATTGTAAAAAGTGTTGCTATCATTGCCCAGCTTGCTTTCTACACAAAGGCTTAGGCATCTCCTATGGCAGGAAGAAGCGGAAACAGCGACGAAGATCTCCTCAAAGCAGTAAGGATCATCAACATCCTGTACAAAAGCAGTGAGTATTAGTAATTAGTATATGTAATGACTCCTTGGGAAATCTGTGCAATAGTAGGACTGGTAGTGGCGCTAATCATAGCAATAGTTGTGTGGACTATAGTAGGCATAGAGTATAGGAAATTGCTAAGGCAAAGAAAAATAGACAGATTAATTGAGAGAATAAGAGAAAGAGCAGAAGACAGTGGCAATGAGAGTGATGGAGAGACAGAGGAATTATCCAAACTTATGGAGCTGGGGGACTATGATCTTGGGAATGATAATAATTTATAGTGCTGCAGAAAACTTGTGGGTTACTGTCTACTATGGGGTACCTGTGTGGAGAGATGCAGACACCACCTTATTTTGTGCATCAGATGCTAAAGCATATGACACAGAAGTGCATAATGTCTGGGCTACACATGCCTGTGTGCCCACAGACCCCAACCCACAAGAAATAAATTTGGAAAATGTGACAGAAGATTTTAACATGTGGAAAAATAACATGGTAGAGCAGATGCATACAGACATAATCAGTCTATGGGACCAAAGCCTAAAGCCATGTGTAAGTTTAACCCCTCTCTGTGTTACTTTAAATTGTACCGATGTGAAGAACAGCACGGGTAGAGACAACATAACGGGAATTAGTATGGCAGGAGAAATAAAAAACTGCTCTTTCAATATGACCACAGAATTAAGGAATAAGAGACAGCAAGCACATTCACTTTTTTATAAACTTGATGTAGTACAAATGGATGGAAATAATGGTAGTCTGTATAGATTAATAAAGTGTAATACTTCAGCCATTACACAAGCTTGTCCAAAGGTATCCTTTGAACCAATTCCCATACATTATTGTGCCCCAGCTGGTTTTGCGATCCTAAAGTGTAAGGATGAGGAGTTCAATGGAACAGGGCCATGCAAGAATGTCAGCACAGTACAATGCACACATGGAATCAGGCCAGTAGTATCAACTCAATTGCTGTTAAATGGCAGTCTAGCAGAAAAAGAGGTAAGAATTAGATCTGAAAATATCTCAGACAATGCTAAAACCATAATAGTACAACTTACCAAGCCTGTAACAATTAATTGTACTAGACCTAACAACAATATAAGCAGAAGAAGGATACATATAGGAAGAGGACAAGCATTCTATGCAACAGGTGGCATGACAGGGAATATAAGACAAGCATATTGTAATGTCAGTAGATCAGATTGGAATACAACTTTACAACAGGTAGTTACACAGTTAAGAAGACACTGGCAGAACACAACAATAGTCTTTAAAAGCTCCTCAGGAGGGGATGTAGAAATTACAACACATAGTTTTAATTGTGGAGGGGAGTTTTTCTATTGTAATACATCAGGCCTGTTTAATAGCACTTGGCCTTGGAATGAGACAAATAGCGAGACAAATAACACGAACGCTACTATAGTGCTCCCATGCAGAATAAAACAAATTGTAAGGATGTGGCAGAGAGTAGGACAAGCAATGTATGCCCCTCCCATCCAAGGAGAAATAAAGTGTACATCAAACATCACAGGACTACTATTAGTAAGAGATGGTGGGGTTGGTAACAATACAAATGGAACTGAAACCTTCAGACCTGGAGGAGGAAATATGAGGGACAATTGGAGAAGTGAATTATATAAGTATAAAGTAGTAAAAATTGAACCACTAGGAGTAGCACCCACCGGGGCAAAAAGAAGAGTGGTAGAGAGAGAAAAAAGAGCAGTTGGAATAGGAGCTGTGTTCATTGGGTTCTTAGGAGCAGCTGGAAGCACTATGGGCGCGGCATCAGTAACGCTGACGGTACAGGCCAGACAATTGTTGTCTGGCATAGTGCAACAGCAAAGCAATTTGCTGAGGGCTATAGAGGCTCAACAGCATATGTTGAAACTCACGGTCTGGGGCATTAAACAGCTCCAGGCAAGAGTCCTGGCTGTGGAAAGATACCTAAAGGACCAACAGCTCCTAGGAATTTGGGGCTGCTCTGGAAAACTCATCTGCACCACCAATGTGCCCTGGAACTCCAGTTGGAGTAATAGAACTCAGAGTGAGATATGGGATAACATGACCTGGCTGCAATGGGATAAAGAAATTAACAATTACACATACACAATCTATAGGCTACTTGAAGAATCGCAAAACCAGCAGGAAAAGAATGAACGAGACTTATTGGCATTGGACAAGTGGGCAAATCTGTGGAATTGGTTTGACATATCAAGATGGCTGTGGTATATAAGAATATTTATCATGATAGTAGGAGGCTTAATAGGATTAAGAATAGTTTTTGCTGTGCTTTCTATAATAAATAGAGTTAGGCAGGGATACTCACCTTTGTCATTTCAGATCCATGCCCCAAACCCAGAGGGTCTCGACAGGCCAGGAAGAATCGAAGAAGAAGGTGGAGAGCAAGGCAGAAACAGATCGATTCGCTTAGCGAGCGGATTCTTAACACTTGCCTGGGAAGATCTGAGGAGCCTGTGCATCTTCAGCTACCACCGCTTGAGGGACTTCATCTTGATTGTCGCAAGGACTGTGGAACTTCTGGGACACAGCAGTCTCAAGGGGTTGAGACTGGGGTGGGAGGGCCTCAAGTATCTGTGGAATCTTCTGCAATACTGGGGTCGGGAACTAAAAACTAGTGCTATTAGTTTGCTTGATGCTACAGCAATAACAGTAGCTGGCTGGACAGATAGGGTTATAGAAATAGGACAGAGGCTTTGTAGAGCTATTCGCAACATACCTAGAAGAATTAGACAGGGCTTCGAAAGGGCTTTGCTATAACATGGGTAGCAAGTGGTCAAAAAGTAGCATAGTGGGCTGGCCTGAGGTTAGGGAAAGAATGAGACGAACTCCTAGGGAAAGAAGGAGACAAACTCCTACAGCAGCAGAAGGAGTAGGAGCAGCAGCAGCAGAAGGAGTAGGAGCAGTATCTAAAGATTTAGAAAAATTTGGAGCAATTACCAGCAGTAATGTAAATCACCCCAGTTGCGCCTGGGTGGAAGCGCAAACGGAAGA
>A1.UA.00.98UA0116_AF413987_K.CM.96.MP535_AJ249239
TGGATGGGTTAATCTACTCCAAGAAAAGACAAGAAATCCTTGATCTGTGGGTCTATCACACACAAGGTTACTTCCCTGATTGGCAGAATTATACCCCAGGGCCAGGGATTAGATTCCCACTAACATTTGGGTGGTGCTACAAGCTAGTACCAGTTGACCCAGCTGACGTAGAAGAGGCCACAGAGGGAGAGAACAACAGCCTATTACACCCTATATGCCAACACGGAATGGATGATGAGGAAAAAGAAGTGTTAATGTGGAAGTTTGACAGTCGCCTGGCTCTAACACACAGAGCCCGAGAGCTGCATCCGGAGTTTTACAAAGACTGCTGACACAGACTGCTGACATGAAGTTGCTGACAGGGACTTTCCGCGGGGACTTTCCAGGGGAGGTGTGGTTTGGGCGGAGTCGGGGAGTGGCTAACCCTCAGATGCTGCATATAAGCAGCTGCTTTTCGCCTGTACTGGGTCTCTCCGGTTAGACCAGATCGAGCCTGGGAGCTCTCTGGCTAGCTAGGGAACCCACTGCTTAAGCCTCAATAAAGCTTGCCTTGAGTGCTTTAAGTAGTGTGTGCCCGTCTGTTGTATGACTCTGGTAACTAGAGATCCCTCAGACTACTCTAGGCAGTGTAAAAATCTCTAGCAGTGGCGCCCGAACAGGGACTCGAAAGCGAAAGTTCCAGAGAAGTTCTCTCGACGCAGGACTCGGCTTGCTGAGGTGCACACAGCAAGAGGCGAGAGCGGCGACTGGTGAGTACGCCTAAGGATTTTTGACTAGCGGAGGCTAGAAGGAGAGAGATGGGTGCGAGAGCGTCAGTATTAAGCGGGGGAAAATTAGATGCATGGGAAAAAATTCGGTTAAGGCCAGGGGGAAAGAAAAAATATAGAATAAAACACCTAGTATGGGCAAGCAGGGAGCTGGAAAGATTCGCGCTTAACCCTAGCCTTCTAGAAACATCAGAAGGATGTCAACAAATACTGGAACAGTTACAACCAACTCTCAAGACAGGATCAGAAGAAGTTAAATCATTATATAATACAGTAGCAACTCTCTATTGTGTACATCAACGGATAGAGATAAAAGACACCAAGGAAGCTTTGGATAAAATAGAGGAGATACAAAATGAGAACAAGCAAAAGACCCAACAGGCAACTGGCACAGGAAGCAGCAGCAAAGTCAGTCAAAATTACCCCATAGTGCAAAATGCACAAGGGCAAATGACACACCAGTCCATGTCACCTAGGACTTTAAATGCATGGGTGAAAGTAATAGAAGAAAAGGCTTTCAGCCCAGAAGTAATACCCATGTTTTCAGCATTGTCAGAGGGAGCCACCCCACAAGATTCAAACATGATGCTGAACATAGTGGGGGGACACCAGGCAGCTATGCAAATGTTGAAAGATACCATCAATGAGGAAGCTGCTGAATGGGATAGGTTACATCCAGCACAGGCAGGGCCTTTTCCACCAGGGCAGATGAGAGAACCAAGGGGAAGTGACATAGCAGGAACTACTAGTACCCTTCAAGAACAAATAGGATGGATGACAAGCAACCCACCTATCCCAGTGGGAGACATCTATAAAAGATGGATAATCCTAGGATTAAATAAGATAGTAAGAATGTATAGCCCTGTTAGCATTTTAGACATAAGACAAGGGCCAAAAGAACCCTTCAGAGACTATGTAGATAGGTTCTTTAAAACTCTTAGAGCTGAGCAAGCTACACAGGAGGTAAAGAACTGGATGACAGAAACCCTGCTGGTCCAAAATGCAGATCCAGATTGTAAAGCCATTTTAAGAGCATTAGGACCAGGGGCTACATTAGAAGAAATGATGACAGCATGCCAGGGAGTGGGAGGACCCGGCCATAAAGCCAGGGTTTTGGCTGAGGCCATGAGTCAAGTACAAAATGCAAACATAATGATGCAGAAAAGTAATTTTAGGGGCCCAAAAAGAATTAAGTGTTTCAACTGTGGCAAAGAAGGACACCTAGCCAGAAATTGCAGGGCCCCTAGGAAAAAGGGCTGTTGGAAATGTGGAAAGGAAGGCCATCAAATGAAAAACTGCACTGAGAGACAGGCTAATTTTTTAGGAAGAATTTGGCCTTCCAGCAAAGGGAGGCCAGGAAATTTTCCTCAGAGCAGACCAGAGCCATCAGCCCCACCAGCAGAAGACTTTGGGAGGGGGGAAGAGATAACCCCCCCCCTGAAACAGGAACAGAAAGACAGGGAACAGCATCCTCCTTCAATTTCCCTCAAATCACTCTTTGGCAACGACCCCTTGTCACAGTAAGAATAGGAGGACAGCTAAAAGAAGCTCTATTAGATACAGGAGCAGATGATACAGTATTAGAAGACATAGATTTGCCAGGAAAATGGAAACCAAAAATGATAGGGGGAATTGGAGGTTTTATCAAGGTAAGACAGTATGATCAAATACTTATAGAAATTTGTGGAAAAAAGGCTATAGGTACGGTATTAGTAGGACCTACCCCTGTCAACATAATTGGAAGAAATATATTGACTCAGCTTGGTTGTACTTTAAATTTTCCAATAAGTCCTATTGAAACTGTACCAGTAACATTAAAGCCAGGAATGGATGGCCCAAAGGTTAAACAATGGCCATTAACAGAGGAGAAAATAAAAGCATTAACAGAGATTTGTATGGAGATGGAAAAGGAAGGAAAAATTTCAAAAATTGGGCCTGAAAATCCATACAATACTCCAGTATTTGCTATAAAGAAAAAGGACAGCACTAAGTGGAGGAAATTAGTAGATTTCAGGGAGCTCAATAAAAGAACTCAGGACTTTTGGGAAGTTCAATTAGGAATACCCCATCCAGCGGGTTTAAAAAAGAAAAAATCAGTAACAGTACTAGATGTGGGGGATGCATATTTTTCAGTTCCTTTAGATGAAAGCTTCGGAAAGTATACTGCATTCACTATACCAAGTATAAACAATGAGACACCAGGGGTCAGATATCAGTACAATGTACTTCCACAGGGATGGAAAGGATCACCATCAATATTCCAGAGTAGCATGACAAAAATCTTAGAGCCCTTTAGATCAAAAAATCCAGAAATAGTTATCTATCAATACATGGATGACTTGTATGTAGGCTCTGATTTAGAAATAGGGCAGCATAGAACAAAAATAGGGGAGTTAAGAGCTCATCTATTGAGCTGGGGATTTACTACACCAGACAAAAAGCATCAGAAAGAACCTCCATTTCTTTGGATGGGACATGGACTCCATCCTGACAAATGGACAGTCCAGCCTATAATGCTGCCAGATAAAGACAGCTGGACTGTCAATGATATACAGAAATTAGTGGGAAAACTAAATTGGGCAAGTCAGATTTATCCAGGGATTAAAGTAAGGCAATTGTGTAAACTCCTCAGGGGAGCCAAAGCACTGACAGATATAGTGACACTGACTGAGGAAGCAGAATTAGAATTGGCAGAGAACAGAGAGATTCTAAAAGAACCTGTGCATGGAGTATATTATGACCCATCAAAAGATTTAGTAGCAGAGATACAGAAACAAGGACAAGACCAATGGACATATCAAATTTATCAGGAGCCATTTAAGAATCTAAAAACAGGAAAATATGCAAAAAAGGGGTCTGCTCACACTAATGATGTAAAGCAATTAACAGAAGCAGTGCAAAAAATAGCCACAGAAGGCATAGTAATATGGGGAAAAACTCCTAAATTTAGACTACCCATACAAAAAGAAACATGGGAGACATGGTGGACAGAATATTGGCAAGCCACCTGGATCCCTGAATGGGAGTTTATCAATACCCCTCCTCTAGTAAAACTATGGTACCAGCTGGAGAAAGAACCCATAGTAGGAGCAGAGACTTTCTATGTAGACGGGGCAGCTAACAGGGAGACTAAGACAGGAAAAGCAGGGTATGTTACTGACAGAGGAAGACAAAAGGTTGTTCCTCTAACTGAGACAACAAATCAAAAGACTGAATTACATGCAATCCATCTAGCTTTGCAGGATTCAGGGTCAGAAGTAAATATAGTAACAGACTCACAATATGCATTAGGGATTATTCAGGCACAACCAGACAGGAGTGAATCAGAGATAGTCAATAAAATAATAGAGAAACTAATAGAAAAAGAAAGAGTCTACCTGTCATGGGTACCAGCGCACAAGGGAATTGGAGGAAATGAACAAGTAGATAAATTAGTCAGTTATGGAATCAGGAGGGTGTTATTTTTAGAAGGGATAGATAAGGCTCAAGAAGAACATGAAAAATATCACAGCAATTGGAAAGCAATGGCTAGTGATTTTAATCTGCCACCTATAGTAGCAAAGGAAATAGTAGCCAGCTGTGATAAATGTCAACTAAAAGGGGAAGCTATGCATGGACAGGTAGACTGTAGTCCAGGGATATGGCAATTAGATTGCACACATCTAGAAGGAAAAGTAATCATAGTAGCAGTCCATGTAGCCAGTGGCTATATAGAAGCAGAAGTTATCCCAGCAGAAACAGGACAGGAGACAGCATACTTTCTGCTAAAATTAGCAGGAAGATGGCCAGTAAAAGTAGTACACACAGATAATGGCCCCAATTTCACCAGCAGCGCAGTTAAGGCTGCCTGTTGGTGGGCAAATATCCAACAGGAATTTGGGATTCCCTACAATCCCCAAAGTCAAGGAGTAGTGGAGTCTATGAATAAGGAATTAAAGAAAATCATAGGGCAGGTAAGAGAGCAAGCTGAACACCTTAAGACAGCAGTACAAATGGCAGTATTCATTCACAATTTTAAAAGAAAAGGGGGGATTGGGGGGTACAGTGCAGGGGAAAGAATAATAGACATAATAGCAACAGACATACAAACTAAAGAATTACAAAAACAAATTATAAAAATTCAGAATTTTCGGGTTTATTACAGGGACAGCAGAGATCCAATTTGGAAAGGACCAGCAAAACTACTCTGGAAAGGTGAAGGGGCAGTGGTAATACAGGACAATAACGATATAAAAGTAGTACCAAGAAGAAAAGCAAAGATCATTAGGGATTATGGAAAACAGATGGCAGGTGATGATTGTGTGGCAAGTAGACAGGATGAGGATTAGAACATGGAACAGTTTAGTAAAACATCATATGTATGTCTCAAAGAAAGCTAGAGGGTGGTTTTATAGACATCACTATGAAAGCAGGCATCCAAAAGTAAGTTCAGAAGTACACATCCCACTAGGGGATGCTAGGCTAGTAGTAAAAACATACTGGGGTCTGCATACAGGAGAAAAAGACTGGCACTTGGGCCATGGGGTCTCCATAGAATGGAGACAGGAAAGGTGTAGCACACAAATAGACCCTGACCTGGCGGACCAACTAATTCATCTGTATTATTTTGACTGTTTTTCAGACTCTGCCATAAGGAAAGCCATAGTAGGACACATAGTTAGCCCTAGGTGTAACTATCCAGCAGGACACAACAAGGTAGGATCTCTACAATACTTGGCACTGAAAGCATTAGTAACACCAACAAGGGAAAGGCCACCTTTGCCTAGTGTTAGGAAACTAACAGAGGAGAGATGGAACAAGCCCCAGAAGACCAGGGGCCGCAGAGGGAACCACACAATGAATGGATGTTAGAACTGTTAGAAGATCTTAAGCATGAAGCTGTCAGACATTTTCCAAGGCCGTGGCTCCATGGATTAGGACAACATATCTATAACACCTATGGGGATACTTGGGAAGGGGTTGAAGCTATAATAAGAACTTTGCAACAACTACTGTTTGTTCATTCCAGAATTGGGTGCCAACATAGCAGAATAGGCATTGTGCAAAGGAGAAGAGCCAGGAATGGATCCAGTAGATCCTAACCTAGAGCCCTGGAATCATCCGGGAAGTCAGCCTAAAACTGCTTGTAGCAATTGTTACTGTAAAAAGTGTTGCTTGTATTGCCAAATTTGCTTTCTAAAAAAAGGCTTAGGCATCTCCTATGGCAGGAAGAAGCGGAGACACAGACGCGGAACTCCTCACAGCAGTAAGGATCATCAAATTCCTATATCAAAGCAGTAAGTACTAAATAAATGTAATGACACCTTTAGAAATCTATGCAATAGTAGCATTAGTAGTAGTGTTTGTCATAGCAATAGTTGTGTGGACTATAGTAGGTATAGAATATAGGAAATTGCTAAAACAAAGAAAAATAGACAGGTTAATTGAGAGAATAAGAGAAAGAGCAGAAGACAGTGGCAATGAAAGCGAGGGGGATGCAGAGGAATTATCAACACTTATGGAGGTGGGGAACTATGCTCTTTTGGATGATAATAATGTGTAAGGCTGCAGAAAACTTATGGGTCACGGTATACTATGGGGTACCTGTGTGGAGAGATGCAGAGACCACCCTATTTTGTGCATCAGATGCTAAAGCATATGATAAAGAAGTACACAATGTCTGGGCTACACATGCCTGCGTACCCACAGACCCTGACCCACAAGAAATAATTTTGGAAAATGTGACAGAGAAATTTAACATGTGGAAAAATAACATGGTAGAACAAATGCAAACAGATATAATCAGTCTCTGGGACCAAAGCCTAAAGCCATGTGTAAAGTTAACCCCTCTCTGCGTTACTTTAAATTGTGCTGGACCCAGCTCTAACAACAGTAACGTTAACAGCAACAGCAACGATAACTGGTCTGAAGAAATGAAAAACTGCTCCTTCAACATGACCACAGAACTAAGAGATAAAAGGAAAACTGTACATTCACTTTTTTATAAACTTGATATAGTATCAACTGGTAGTAATGATAGTAGGCAGTATAGACTAATAAATTGTAATACATCAGCCATGACACAGGCCTGTCCTAAGGTAACCTTTGAGCCAATTCCTATACATTATTGTGCCCCAGCTGGTTTTGCGATTCTAAAGTGCAAGGATACAAATTTTACTGGAACAGGGCCATGCAAGGATGTCAGCACAGTACAATGCACACATGGAACCAAGCCAGTAGTATCAACTCAACTGCTGTTAAATGGCAGTCTAGCAGAGAAAGAGGTAATGATTAGATCTGAAAATATCACAGACAATGGCAAAATCATAATAGTACAGCTTACTGAGCCTGTAAACATCACTCGTATCAGACCTGGCGAGAATAAAAGAACAAGTATACGTATAGGACCAGGACAAACCTTCTATGCAACAGGTGATGTAATAGGGGACATAAGAAAAGCATATTGTAATGTCAGCAGAGCAGCATGGAATAGCACTTTACAAAAGATAAGTACACAATTAAGACAATACTTTAATAACAAAACAATAATCTTTAAGAACTCCTCAGGAGGGGATTTAGAAGTTACAACACATAGTTTCAATTGTGGAGGAGAATTTTTCTATTGCAATACAACAGACCTGTTCAATAGCACTTGGAACGAACATGGCCCTGTCACAAATAGCACAATGGCCAATGGAACTATAACTCTACCATGCAGAATAAAGCAAATTATAAATATGTGGCAGAGAGTAGGACAAGCAATGTATGCCCCTCCTATTGAAGGAAATATAAGGTGTGAATCAAACATTACAGGACTACTATTAACAAGAGATGGTGGAAGTGGAGCTAATAGCAGCAAGGAGACCTACAGACCTATAGGAGGAAATATGAGGGACAATTGGAGAAGTGAACTATATAAGTATAAAGTAGTAAAAATTGAACCCATAGGAGTAGCACCCACCAAGGCAAAGAGAAGAGTGGTGGAGAGAGAAAAAAGAGCAATTGGACTGGGAGCTGCCTTCCTTGGGTTCTTAGGAGCAGCAGGAAGTACTATGGGCGCGGCGTCAATGACGCTGACGGTACAGGCCAGACAATTATTGTCTGGCATAGTGCAACAGCAAAGCAATTTGCTGAGGGCTATAGAGGCTCAGCAGCATCTGCTGAAACTCACGGTCTGGGGCATTAAACAGCTCCAGGCAAGAGTCCTGGCTGTGGAAAGATACCTAAAGGATCAGCAGCTCCTAGGAATTTGGGGTTGCTCTGGAAAACTCATCTGCACCACTAATGTGCCCTGGAACTCTAGTTGGAGTAATAAATCTCAGAGTGAGATATGGGGTAACATGACCTGGATGCAATGGGACAGGGAAGTTATCAATTACACAAACATAATATATGATCTAATTGAAGAATCGCAAAACCAGCAGGAAAAGAATGAGCAAGATTTATTGGCATTAGACAAGTGGGCAAGTCTGTGGAGTTGGTTTGACATATCAAATTGGTTATGGTATATAAAAATATTTATAATAATAGTAGGAGGCTTAATAGGATTAAGAATAGTTTTTGCAGTGCTTTCTATAATAAATAGAGCCGGGCAGGGATACTCACCCTTGTCATTGCAGACCCTTACCCCGCACCCAGAGGGACCAGACAGGCCCGGAAGAATCAAAGAAGAAGGTGGAGAGCAAGACAGAGACAGATCGATTCGATTAGTGAGCGGATTCTTAGCACTTGCCTGGGACGATCTGCGGAGCCTGTGCCTCTTCAGCTACCGCCGATTGAGAGACTTCATCTCGATTGCAGCGAGGACTGTGGAACTTCTGGGACGCAGCAGTCTCAAGGGACTGAGACTGGGGTGGGAGGGCCTCAAATATCTGGGGAATCTTCTGGGATATCGGGGTCAGGAACTAAAGAGTAGTGCTATTAATCTGATAGATACCATAGCAATAGCAGTAGCTGGGTGGACAGATAGGGTTATAGAAATAGGACAAAGATTTTGTAGAGCTATTCGTAACATACCTAGGAGAATCAGACAGGGCGCAGAAAGGGCTTTGCAATAACATGGGGGGCAAATGGTCAAAAAGTAGCATAGTGGGATGGCCTCAGATTAGGGAAAGATTAAGACGAGCTCCTGCTCCAGCAGCAAGAGGAGTAGGACCAGTATCTCAAGATTTGGATAAGCATGGAGCAGTCACAAGCAGTAATACAGCAGCTACTAATGCTGATTGCGCCTGGCCAGAGGCGCAAGAGGAAGAGGAGGTAGGCTTTCCAGTCAAGCCGCAGGTGCCTTTGAGACCGATGACATATAAGGGAGCTTTCGATCTCAGCCACTTTTTAAAAGAAAAGGGGGGACTGGATGGGTTAATCTACTCCAAGAAAAGACAAGAAATCCTTGATCTGTGGGTCTATCACACACAAGGTTACTTCCCTGATTGGCAGAATTATACCCCAGGGCCAGGGATTAGATTCCCACTAACATTTGGGTGGTGCTACAAGCTAGTACCAGTTGACCCAACTGAAGTAGAAGAGGCCACAGAGGGAGAGAACAACAGCCTATTACACCCTATATGCCAACACGGAATGGATGATGAGGAAAAAGAAGTGTTAATGTGGAAGTTTGACAGTCGCCTGGCTCTAACACACAGAGCCCGAGAGCTGCATCCGGAGTTCTACAAAGACTGCTGACACAGACTGCTGACATGAAGTTGCTGACAGGGACTTTCCGCGGGGACTTTCCAGGGGAGGTGTGGTTTGGGCGGAGTCGGGGAGCGGCTAACCCTCAGATGCTGCATATAAGCAGCTGCTTTTCGCCTGTACTGGGTCTCTCCGGTTAGACCAGATCGAGCCTGGGAGCTCTCTGGCTAGCTAGGGAACCCACTGCTTAAGCCTCAATAAAGCTTGCCTTGAGTGCTTTAAGTAGTGTGTGCCCGTCTGTTGTATGACTCTGGTAACTAGAGATCCCTCAGACTACTCTAGGCAGTGTAAAAATCTCTAGCA
>A2.CY.94.94CY017_41_AF286237_B.NL.00.671_00T36_AY423387
TTGAAAAGCGAAAGTAACAGGGACTCGAAAGCGAAAGTTCCAGAGGAGTTCTCTCGACGCAGGACTCGGCTTGCTGAGGTGCACACGGCAAGAGGCGAGGGGCGGCGACTGGTGAGTACGCCTAATATTTTTGACTAGCAGAGGCTAGAAGGAGAGAGATGGGTGCGAGAGCGTCAATATTAAGCGGGGGAAAATTAGATGCTTGGGAGAAAATTCGGTTAAGGCCAGGGGGAAAGAAAAAATATAGACTGAAACATTTGGTATGGGCAAGCAGGGAGCTGGAGAAATTCTCAATTAACCCTGGCCTTTTAGAAACACCAGAGGGATGTAGACAAATAATAAGGCAGTTACAACCAGCTCTCCAAACAGGAACAGAAGAACTTAAATCATTATATAATACAGTAGTAGTCCTCTACTGGGTACATCAAAGGGTAGATGTAAAAGACACCAAGGAAGCTCTAGATAAAATAGAGGAAGAACAAAACAAGCAGAAAACACAGCATGCAGCAGCTGACACAGGGAACAGCAGCAGTCAAAATTATCCCATAGTGCAAAATGCACAAGGGCAAATGGTACACCAGGCTATATCACCTAGGACGTTGAATGCCTGGGTCAAAGTAGTAGAAGAAAAGGCTTTCAGCCCAGAAGTAATACCTATGTTTACAGCATTATCAGAAGGAGCCACCCCACAAGACTTAAATACTATGCTAAACACAGTGGGGGGACATCAAGCAGCTATGCAAATGTTAAAAGATACCATCAATGAGGAAGCTGCAGAATGGGACAGGGTACATCCAGTACATGCAGGGCCTATTCCACCAGGCCAGATGAGAGAACCAAGGGGAAGTGACATAGCAGGAACTACTAGTACCCTTCAGGAACAAATAGGTTGGATGACCAGCGATCCACCCATCCCAGTGGGAGAAATTTATAAAAGATGGATAATCCTGGGATTAAATAAAATAGTAAGAATGTATAGCCCTGTCAGCATTTTGGACATAAGACAAGGGCCAAAAGAACCCTTTAGAGATTATGTGGATAGGTTCTTTAAAACTCTAAGAGCTGAGCAAGCCACACAGGAGGTAAAAAACTGGATGACGGACACCTTGCTGGTCCAAAATGCGAACCCAGATTGTAGATCCATCTTGAGAGCATTAGGACCAGGGGCCTCATTAGAAGAAATGATGACAGCATGTCAGGGAGTGGGAGGACCCAGCCATAAAGCAAGGGTTTTGGCTGAAGCAATGAGCCATGTACAAAGTACAAATACAAACATAATGATGCAGAGAGGCAATTTTAGGGGTCAAAAAAGAATTAAGTGTTTCAACTGTGGCAAGGAAGGACACCTAGCCAGAAATTGCAGGGCCCCTAGGAAAAAGGGCTGCTGGAAATGTGGAAAGGAAGGACATCAAATGAAAGATTGCACTGAGAGACAGGCTAATTTTTTAGGGAAAATTTGGCCTTCCAACAAAGGGAGGCCAGGAAATTTTCCTCAGAGCAGAACAGAGCCAACAGCCCCACCAGCAGAGAACTTGAGAATGGGGGAAGAGATAACCTCCTCCCTGAAGCAGGAACTGGAGACCAGGGAACCATACAATCCTGCAATTTCCCTCAAATCACTCTTTGGCAACGACCCCTTGTTACAGTAAAGATAGAGGGACAGCTAAAAGAAGCTCTATTAGATACAGGAGCAGATGATACAGTGTTAGAAGAAATAAATTTGCCAGGAAAATGGAAACCAAAAATGATAGGGGGAATTGGAGGTTTTATCAAAGTAAGACAATATGATCAGATAGCTATAGAAATTTGTGGAAAAAGGGCCATAGGTACAGTATTAGTAGGACCTACCCCTGTCAACATAATCGGAAGAAATATGTTGGTTCAGCTTGGTTGTACTTTAAATTTTCCAATTAGTCCTATTGAAACTGTACCAGTAAAATTAAAGCCAGGAATGGATGGTCCAAAGGTTAAACAATGGCCATTGACAGAAGAAAAAATAAAAGCATTAACAGAAATCTGTAAAGAAATGGAAAAGGAAGGAAAAATTTCAAAAATTGGGCCTGAAAATCCATACAACACTCCAGTGTTTGCTATAAAGAAAAAAGACAGCACTAAATGGAGAAAATTAGTAGATTTTAGAGAACTCAATAAGAGAACTCAAGACTTCTGGGAAGTTCAGTTAGGAATACCACATCCAGCAGGATTAAAAAAGAAAAAAGCAGTAACAGTACTTGATGTGGGGGACGCATATTTTTCCGTTCCCTTACATGAAGACTTCAGAAAATATACTGCATTCACCATACCTAGTACCAACAATGAGACACCAGGAGTTAGGTATCAGTACAATGTACTTCCACAGGGATGGAAAGGATCACCAGCAATATTCCAGAGTAGCATGACAAAGATCTTAGAGCCCTTTAGATCAAAGAATACAGAATTAATCATCTACCAATACATGGATGACTTGTATGTAGGATCTGATTTAGAAATAAGCCAGCATAGAGTAAAAATAGAGGAATTAAGGGCTCACTTATTGAAATGGGGATTTTATACACCAGACAAAAAACATCAGAAAGAACCTCCATTTCTTTGGATGGGATATGAGCTTCATCCTGACAAATGGACAGTCCAGCCTATAAAGCTGCCAGAAAAAGACAGCTGGACTGTCAATGATATACAGAAATTAGTAGGGAAATTAAATTGGGCAAGTCAGATTTATGCAGGGATTAAAGTAAAGCAACTGTGTAAACTCCTTAGAGGAGCCAAAGCACTAACAGACATAGTAACACTGACTAAAGAAGCAGAGTTAGAATTAGAAGAGAACAGGGAAATTTTAAAAACCCCTGTACATGGGGTATACTATGACCCATCAAAAGACTTAATAGCAGAAATACAGAAACAAGGGCAAGACCAATGGACATATCAAATTTATCAGGAACCCTTTAAGAATCTGAAAACAGGGAAATATGCAAAAAGGAGGTCCACCCACACTAATGATATAAAACAGTTAACAGAAGCAGTACAAAAAATAACCATGGAAAGCATAGTGATATGGGGAAAGACTCCTAAATTTAAATTACCCATACAAAAGGAAACATGGGAGACATGGTGGGCGGAGTATTGGCAGGCTACCTGGATTCCTGAGTGGGAGTTTGTCAATACCCCTCCTCTAGTAAAACTGTGGTACCAGTTAGAAAAAGAACCCATAGCAGGAGCAGAAACTTTCTATGTAGATGGGGCAGCTAATAGAGAGACTAAACTAGGAAAGGCAGGGTATGTCACTGACAGAGGAAGACAAAAAATTGTCTCCCTGACGGAGACAACAAATCAAAAGACTGAATTACATGCAATCTATTTGGCTTTACAGGATTCAGGATTAGAAGTGAACATAGTGACAGATTCACAGTATGCATTAGGAATCATTCAAGCACAACCAGAAAGGAGTGAATCAGAGATAGTCAATCAAATAATAGAAAAATTAATAGAAAAGGAAAGGGTCTACCTATCATGGGTACCAGCACACAAAGGGATTGGAGGAAATGAACAAGTAGACAAATTAGTCAGTTCTGGAATCAGGAAAGTGCTATTTTTAGATGGGATAGATAAGGCTCAAGAGGAACATGAAAGATATCACAGCAATTGGAGAGCAATGGCTCATGACTTTAATCTACCACCTGTAGTAGCAAAAGAAATAGTAGCTAGCTGTGATAAATGTCAGCTAAAAGGGGAAGCCATGCATGGACAAGTAGACTGTAGTCCAGGAATATGGCAACTAGATTGCACACATCTTGAAGGAAAAGTTATCCTGGTGGCAGTCCATGTGGCCAGTGGCTATATAGAAGCAGAAGTCATCCCAACAGAAACAGGACAGGATACAGCATACTTTATATTAAAACTAGCAGGAAGATGGCCAGTAAAAGTAATACATACAGACAATGGGCCCAATTTCATCAGTGCAACAGTTAAGGCAGCCTGTTGGTGGGCAGGTATCCAACAAGAATTTGGGATTCCCTACAATCCCCAAAGTCAAGGAGTAGTGGAATCTATGAATAAAGAATTAAAGAAAATCATAGGGCAGGTAAGAGATCAAGCTGAACACCTTAAGACAGCAGTACAAATGGCAGTATTCATTCACAATTTTAAAAGAAAAGGGGGGATTGGGGGATACAGTGCAGGGGAAAGAATAATAGACATAATAGCAACAGATATACAAACTAAAGAACTACAAAGACAAATTACAAAAATTCAAAATTTTCGGGTTTATTACAGGGACAGCAGAGATCCAATTTGGAAAGGACCAGCAAAACTCCTTTGGAAAGGTGAAGGGGCAGTAGTAATACAAGACAATAGTGACATAAAGGTAGTACCAAGAAGAAAAGCAAAGATCATTAGGGATTATGGAAAACAGATGGCAGGTGATGATTGTGTGGCAGGTAGACAGGATGAGGATTAGAACATGGAACAGTTTAGTTAAACATCATATGTATATTTCAAGGAAAGCTAAAGGTTGGGTCTATAAACATCACTATGAAAGCAGAAATCCAAGAATAAGTTCAGAAGTACACATCCCGCTAGGGGAGGCTAGAATAATAGTAAGAACATATTGGGGTCTGCACATAGGAGAAAAAGACTGGCACTTGGGTCATGGAGTCTCCATAGAATGGAGGCAAAACAGGTATCATACACAAATAGACCCTGATCTGGCAGACCATCTAATCCATCTGTATTATTTTGACTGTTTTTCAGAATCTGCCATAAGGAAAGCCATAATAGGAGAAATAGTTAGTCCTAGGTGTGAATATCAAGCAGGACATAACAAGGTAGGGTCTCTGCAATATTTGGCATTGAAAGCAGTAGTAGCTTCAACAAGGACAAAGCCACCTTTGCCTAGTGTTAGGAAATTAGTAGAGGATAGATGGAACAAGCCCCAGAAGACCAAGGGCCACAGAGGGAGCCATACAATGAATGGATGTTAGAACTGTTAGAGGAGCTCAAGCAGGAAGCTGTTAGACATTTCCCTAGGCACTGGCTACATGGCCTAGGACAATACATCTATAATACCTATGGGGATACCTGGGAAGGAGTGGAAGCCCTAATAAGAATTCTGCAACAACTGCTGTTTATTCATTTCAGAATTGGATGTCAACATAGCAGAATAGGCATTACTCGACGAGGGAGAGTAAGGAATGGAGCCAGTAGACCCTAGACTAGAGCCCTGGAAGCATCCAGGAAGTCAGCCTAAAACTGCTTGTACCAAATGTTATTGTAAACGCTGTTGCTATCATTGCCAGTTGTGCTTTATAAACAAAGGCTTAGGCATCTCCTACGGCAGGAAGAAGCGACGACCCCGACGAAAGCCTTCTCCAAGCAATAAGGACCATCAAAATCCTATACCAAAGCAGTAAGTAGTAGTAATTAATATATGTAATGTTACCTTTAGTAATATTGGCAATAGTAGGACTGATAGTAGCTTTAATCTTAGCAATAGTTGTATGGACTATAGTATTCATAGAATATAAGAAAATTAAGAAGCAAAGGAAAATAGACTGGTTAATCAAAAGAATAAGTGAGAGAGCAGAAGACAGTGGCAATGAGAGTGATGGGGACACAGAGGAACTATCAGCACTTGTGGAGAGGGGGCATCTTGATTTTGGGGATGTTAATAATGTGTAAAGCTACAGATTTGTGGGTCACAGTATACTATGGAGTACCTGTGTGGAAAGATGCAGATACCATCCTATTTTGTGCATCAGATGCTAAAGCATATGATACAGAAGTGCATAATGTATGGGCCACACATGCCTGTGTACCCACAGACCCCAACCCACAAGAAATAAACCTGGAAAATGTAACAGAAAATTTTAATATGTGGAAAAATAACATGGTAGAGCAGATGCAAGAAGATATAATCAGCTTATGGGATCAAAGCCTAAAGCCATGTGTAAAATTAACCCCGCTCTGCGTCATTTTAAATTGTAGCAATGCCAATACCAGCACCCATAGCAATAGCAGTAGCACCCAGAGCCCCATTAATGAAGAAATAAAAAACTGCTCTTACAATACTACCACAATACTAAGAGATAAGACACAAAAAGTTTATTCACTGTTTTATAGACTTGATGTAGTACAACTTGATGAAAGTGAAAATAAGAATACATCAGGTAGTAATACTCTGTATAGACTAATAAATTGTAATACCTCAACCATCACACAAGCGTGTCCAAAGGTAACCTTTGAGCCAATTCCTATACATTATTGTGCCCCAGCTGGTTTTGCGATTCTAAAGTGTAAGGATCCGAGATTCAATGGAACAGGGTCATGCAAGAATGTTAGCTCAGTACAATGTACACATGGAATTAAACCAGTAGCATCAACTCAACTGCTGTTGAATGGCAGTCTAGCAGAAGGAGGGAAAATAATGATTAGATCTGAAAATATTACAAACAATGCCAAAAACATAATAGTTCAGTTTACTAAGCCTGTACTAATTACTTGTATCAGACCCAACAACAATACAAGAAAAAGTATACGCTTTGGACCAGGACAAGCCTTCTATACAAATGAAATAATAGGGGACATAAGACAAGCACATTGTAATATCAACAAAACATTATGGAATGACACTTTACAAAAGGTAGCTGAACAATTAAGAGAGAAATTCCCTAAGAAAACCATAATCTTTACTAACTCCTCAGGAGGGGACCCAGAAATTACAACACTTAGTTTTAATTGTGCAGGAGAATTTTTCTATTGCAATACAACAGGCCTGTTTAATGGTACGTGGTGGAACAATGGTACGTGGAACGGGCCCTACACACCTAATAACACCAATGGAAGTATAATCCTCCCATGCAGAATAAAACAAATTATAAACATGTGGCAGAGAGTAGGAAGAGCAATGTATGCCCCTCCCATTGCAGGAATAATAAAGTGTACATCAAACATTACAGGAATAATATTGACAAGAGATGGTGGTAACAATGGGACTAATGAGACCTTCAGACCTGGAGGAGGAGATATGAGGGACAATTGGAGAAGTGAATTATATAAATATAAAGTAGTAAAACTTGAACCACTAGGAGTAGCACCTACCAGGGCAAAAAGAAGAGTGGTGGAGAGAGAAAAAAGAGCAGTTGGACTGGGAGCTGTCTTCCTTGGGTTCTTGGGAGCAGCAGGAAGCACTATGGGCGCGGCGTCACTAACGCTGACGGTACAGGCCAGACAATTATTGTCTGGTATAGTGCAACAGCAAAGCAATTTGCTGCAGGCTATAGAAGCTCAACAGCATCTGTTGAAACTCACAGTCTGGGGCATTAAACAGCTCCAGGCGAGGGTCCTGGCTGTGGAAAGATACCTAAAGGATCAACAGCTCCTGGGAATTTGGGGCTGCTCTGGAAAACTCATCTGCGCCACTACTGTGCCCTGGAACACTAGTTGGAGTAATAAGTCTCAGGATGAGATTTGGGACAACATGACCTGGTTGCAATGGGATAAAGAAATTAGCAATTACACAAACATAATATATAGGTTACTTGAAGAATCGCAAAACCAGCAGGAAAAGAATGAGCAAGACTTATTGGCATTAGACAAATGGGCAGATTTGTGGAGTTGGTTCAACATTTCACACTGGCTGTGGTATATAAGAATATTTATAATGATAGTAGGAGGCTTGATAGGATTAAGAATAGTTTTTGCTATAATTACTGTAGTAAATAGAGTTAGGCAGGGATACTCACCTGTGTCATTTCAGATCCCTACCCCAAGCCCAGAGGGTCCCGACAGGCCCAGAGGAACCGAAGAAGGAGGTGGAGAGCAAGGCAGAGACAGATCGATTCGATTAGTGAACGGGTTCTTCGCACTTGCCTGGGACGACCTACGGAGCCTGTGCCTCTTCAGTTACCACCGCTTGAGAGATTGCATATTGATTGCAGCGAGGACTGTGGAACTTCTGGGACACTGCAGTCTCAAGGGACTGAGACTGGGGTGGGAAGGTCTCAAGAATCTGTGGAATCTTCTGTTATACTGGGGTCGGGAACTGAAGAATAGTGCTATTAGCTTATTTGATACTATAGCAGTAGCAGTAGCTGAGTGGACAGATAGGGTTATAGAAATAGGGCAAAGAGCTTTCAGAGCTATTCTCAACATACCTAGAAGAATCAGACAGGGCTTAGAAAGGGCTTTACTATAAAATGGGGGGCAAGTGGTCAAAAAGGAGCATACCAGGATGGCCTGCTATTAGGGAGAGAATGAGAAGAACTCCTCCAACAGCACAAAGAACAGAAGCAGTGTCTCCAGCAGCACCAGGAGTAGGAGCAGTGTCTCAAGATTTAGCTACTCATGGAGCAGTCACAAGCAGTAATACAGCAGCTACTAATCCTGATTGCGCCTGGGTGGAAGCGCAAGAAGAGGAGAGTGAAGTAGGCTTCCCAGTCAGGCCACAGGTACCTTTAAGGCCAATGACCTTCAAGGGAGCGTTTGATCTCAGCTTCTTTTTAAAAGAAAAGGGGGGACTGGATGGGTTAATTTACTCCCAGAAAAGACAAGACATCCTTGATATGTGGGTCTACCACACACAAGGCTACTTCCCTGATTGGCAGAATTACACACCAGGGCCAGGGATCAGATACCCATTAACATTTGGATGGTGCTTCAAGCTAGTACCAGTAGAGCCATCTGAGGTAGAAGAAGCTACTCAGGGAGAGAACAACAGCTTATTACACCCTATATGCCAACATGGAGTAGATGACCCTGAAAGAGAAGTGTTAAGATGGGAGTTTGATAGAAGCCTGGCACGGAGACACAGAGCCCGAGAGCTGCATCCGGAGTACTACAAAGACTGCTGACACAGAAGTTGCTGACGGGGACTTTCCGCTGGGGACTTTCCAGGGAGGTGTGGTGTGGGCGGAGTTGGGGAGTGGCTAACCCTCAGATGCTGCATATAAGCAGCTGCTTCTCGCATGTACTGGGTCTCTCTTGTTGGACCAGATAGAGCCCGGGAGCTCTCTGGCTAGCAGGGGAACCCACTGCTTAAGCCTCAATAAAGCTTGCCTTGAGAGCTTC
>A2.CY.94.94CY017_41_AF286237_C.BW.99.99BW393212_AF443083
TTGAAAAGCGAAAGTAACAGGGACTCGAAAGCGAAAGTTCCAGAGGAGTTCTCTCGACGCAGGACTCGGCTTGCTGAGGTGCACACGGCAAGAGGCGAGGGGCGGCGACTGGTGAGTACGCCTAATATTTTTGACTAGCAGAGGCTAGAAGGAGAGAGATGGGTGCGAGAGCGTCAATATTAAGCGGGGGAAAATTAGATGCTTGGGAGAAAATTCGGTTAAGGCCAGGGGGAAAGAAAAAATATAGACTGAAACATTTGGTATGGGCAAGCAGGGAGCTGGAGAAATTCTCAATTAACCCTGGCCTTTTAGAAACACCAGAGGGATGTAGACAAATAATAAGGCAGTTACAACCAGCTCTCCAAACAGGAACAGAAGAACTTAAATCATTATATAATACAGTAGTAGTCCTCTACTGGGTACATCAAAGGGTAGATGTAAAAGACACCAAGGAAGCTCTAGATAAAATAGAGGAAGAACAAAACAAGCAGAAAACACAGCATGCAGCAGCTGACACAGGGAACAGCAGCAGTCAAAATTATCCCATAGTGCAAAATGCACAAGGGCAAATGGTACACCAGGCTATATCACCTAGGACGTTGAATGCCTGGGTCAAAGTAGTAGAAGAAAAGGCTTTCAGCCCAGAAGTAATACCTATGTTTACAGCATTATCAGAAGGAGCCACCCCACAAGACTTAAATACTATGCTAAACACAGTGGGGGGACATCAAGCAGCTATGCAAATGTTAAAAGATACCATCAATGAGGAAGCTGCAGAATGGGACAGGGTACATCCAGTACATGCAGGGCCTATTCCACCAGGCCAGATGAGAGAACCAAGGGGAAGTGACATAGCAGGAACTACTAGTACCCTTCAGGAACAAATAGGTTGGATGACCAGCGATCCACCCATCCCAGTGGGAGAAATTTATAAAAGATGGATAATCCTGGGATTAAATAAAATAGTAAGAATGTATAGCCCTGTCAGCATTTTGGACATAAGACAAGGGCCAAAAGAACCCTTTAGAGATTATGTGGATAGGTTCTTTAAAACTCTAAGAGCTGAGCAAGCCACACAGGAGGTAAAAAACTGGATGACGGACACCTTGCTGGTCCAAAATGCGAACCCAGATTGTAGATCCATCTTGAGAGCATTAGGACCAGGGGCCTCATTAGAAGAAATGATGACAGCATGTCAGGGAGTGGGAGGACCCAGCCATAAAGCAAGGGTTTTGGCTGAAGCAATGAGCCATGTACAAAGTACAAATACAAACATAATGATGCAGAGAGGCAATTTTAGGGGTCAAAAAAGAATTAAGTGTTTCAACTGTGGCAAGGAAGGACACCTAGCCAGAAATTGCAGGGCCCCTAGGAAAAAGGGCTGCTGGAAATGTGGAAAGGAAGGACATCAAATGAAAGATTGCACTGAGAGACAGGCTAATTTTTTAGGGAAAATTTGGCCTTCCAACAAAGGGAGGCCAGGAAATTTTCCTCAGAGCAGAACAGAGCCAACAGCCCCACCAGCAGAGAACTTGAGAATGGGGGAAGAGATAACCTCCTCCCTGAAGCAGGAACTGGAGACCAGGGAACCATACAATCCTGCAATTTCCCTCAAATCACTCTTTGGCAACGACCCCTTGTTACAGTAAAGATAGAGGGACAGCTAAAAGAAGCTCTATTAGATACAGGAGCAGATGATACAGTGTTAGAAGAAATAAATTTGCCAGGAAAATGGAAACCAAAAATGATAGGGGGAATTGGAGGTTTTATCAAAGTAAGACAATATGATCAGATAGCTATAGAAATTTGTGGAAAAAGGGCCATAGGTACAGTATTAGTAGGACCTACCCCTGTCAACATAATCGGAAGAAATATGTTGGTTCAGCTTGGTTGTACTTTAAATTTTCCAATTAGTCCTATTGAAACTGTACCAGTAAAATTAAAGCCAGGAATGGATGGTCCAAAGGTTAAACAATGGCCATTGACAGAAGAAAAAATAAAAGCATTAACAGAAATCTGTAAAGAAATGGAAAAGGAAGGAAAAATTTCAAAAATTGGGCCTGAAAATCCATACAACACTCCAGTGTTTGCTATAAAGAAAAAAGACAGCACTAAATGGAGAAAATTAGTAGATTTTAGAGAACTCAATAAGAGAACTCAAGACTTCTGGGAAGTTCAGTTAGGAATACCACATCCAGCAGGATTAAAAAAGAAAAAAGCAGTAACAGTACTTGATGTGGGGGACGCATATTTTTCCGTTCCCTTACATGAAGACTTCAGAAAATATACTGCATTCACCATACCTAGTACCAACAATGAGACACCAGGAGTTAGGTATCAGTACAATGTACTTCCACAGGGATGGAAAGGATCACCAGCAATATTCCAGAGTAGCATGACAAAGATCTTAGAGCCCTTTAGATCAAAGAATACAGAATTAATCATCTACCAATACATGGATGACTTGTATGTAGGATCTGATTTAGAAATAAGCCAGCATAGAGTAAAAATAGAGGAATTAAGGGCTCACTTATTGAAATGGGGATTTTATACACCAGACAAAAAACATCAGAAAGAACCTCCATTTCTTTGGATGGGATATGAGCTTCATCCTGACAAATGGACAGTCCAGCCTATAAAGCTGCCAGAAAAAGACAGCTGGACTGTCAATGATATACAGAAATTAGTAGGGAAATTAAATTGGGCAAGTCAGATTTATGCAGGGATTAAAGTAAAGCAACTGTGTAAACTCCTTAGAGGAGCCAAAGCACTAACAGACATAGTAACACTGACTAAAGAAGCAGAGTTAGAATTAGAAGAGAACAGGGAAATTTTAAAAACCCCTGTACATGGGGTATACTATGACCCATCAAAAGACTTAATAGCAGAAATACAGAAACAAGGGCAAGACCAATGGACATATCAAATTTATCAGGAACCCTTTAAGAATCTGAAAACAGGGAAATATGCAAAAAGGAGGTCCACCCACACTAATGATATAAAACAGTTAACAGAAGCAGTACAAAAAATAACCATGGAAAGCATAGTGATATGGGGAAAGACTCCTAAATTTAAATTACCCATACAAAAGGAAACATGGGAGACATGGTGGGCGGAGTATTGGCAGGCTACCTGGATTCCTGAGTGGGAGTTTGTCAATACCCCTCCTCTAGTAAAACTGTGGTACCAGTTAGAAAAAGAACCCATAGCAGGAGCAGAAACTTTCTATGTAGATGGGGCAGCTAATAGAGAGACTAAACTAGGAAAGGCAGGGTATGTCACTGACAGAGGAAGACAAAAAATTGTCTCCCTGACGGAGACAACAAATCAAAAGACTGAATTACATGCAATCTATTTGGCTTTACAGGATTCAGGATTAGAAGTGAACATAGTGACAGATTCACAGTATGCATTAGGAATCATTCAAGCACAACCAGAAAGGAGTGAATCAGAGATAGTCAATCAAATAATAGAAAAATTAATAGAAAAGGAAAGGGTCTACCTATCATGGGTACCAGCACACAAAGGGATTGGAGGAAATGAACAAGTAGACAAATTAGTCAGTTCTGGAATCAGGAAAGTGCTATTTTTAGATGGGATAGATAAGGCTCAAGAGGAACATGAAAGATATCACAGCAATTGGAGAGCAATGGCTCATGACTTTAATCTACCACCTGTAGTAGCAAAAGAAATAGTAGCTAGCTGTGATAAATGTCAGCTAAAAGGGGAAGCCATGCATGGACAAGTAGACTGTAGTCCAGGAATATGGCAACTAGATTGCACACATCTTGAAGGAAAAGTTATCCTGGTGGCAGTCCATGTGGCCAGTGGCTATATAGAAGCAGAAGTCATCCCAACAGAAACAGGACAGGATACAGCATACTTTATATTAAAACTAGCAGGAAGATGGCCAGTAAAAGTAATACATACAGACAATGGGCCCAATTTCATCAGTGCAACAGTTAAGGCAGCCTGTTGGTGGGCAGGTATCCAACAAGAATTTGGGATTCCCTACAATCCCCAAAGTCAAGGAGTAGTGGAATCTATGAATAAAGAATTAAAGAAAATCATAGGGCAGGTAAGAGATCAAGCTGAACACCTTAAGACAGCAGTACAAATGGCAGTATTCATTCACAATTTTAAAAGAAAAGGGGGGATTGGGGGATACAGTGCAGGGGAAAGAATAATAGACATAATAGCAACAGATATACAAACTAAAGAACTACAAAGACAAATTACAAAAATTCAAAATTTTCGGGTTTATTACAGGGACAGCAGAGATCCAATTTGGAAAGGACCAGCAAAACTCCTTTGGAAAGGTGAAGGGGCAGTAGTAATACAAGACAATAGTGACATAAAGGTAGTACCAAGAAGAAAAGCAAAGATCATTAGGGATTATGGAAAACAGATGGCAGGTGATGATTGTGTGGCAGGTAGACAGGATGAGGATTAGAACATGGAACAGTTTAGTTAAACATCATATGTATATTTCAAGGAAAGCTAAAGGTTGGGTCTATAAACATCACTATGAAAGCAGAAATCCAAGAATAAGTTCAGAAGTACACATCCCGCTAGGGGAGGCTAGAATAATAGTAAGAACATACTGGGGCTTGCAAACAGGAGAAAAAGATTGGCATTTGGGTCATGGAGTCTCCATAGAATGGAGATTAAAAAGATACAGCACACAAGTAGACCCTAGCATGGCAGACCAGCTAATTCATATGCATTATTTTGATTGTTTTGCAGACTCTGCCATAAGGAAAGCCATAATAGGAGAAATAGTTAGTCCTAGGTGTGAATATCAAGCAGGACATAACAAGGTAGGGTCTCTGCAATATTTGGCATTGAAAGCAGTAGTAGCTTCAACAAGGACAAAGCCACCTTTGCCTAGTGTTAGGAAATTAGTAGAGGATAGATGGAACAAGCCCCAGAAGACCAAGGGCCACAGAGGGAGCCATACAATGAATGGATGTTAGAACTGTTAGAGGAGCTCAAGCAGGAAGCTGTTAGACATTTCCCTAGGCACTGGCTACATGGCCTAGGACAATACATCTATAATACCTATGGGGATACCTGGGAAGGAGTTGAAGTTATCATAAGATATCTGCAACAACTACTGTTTGTCCATTTCAGAATTGGGTGCCAACATAGCAGGATAGGCATTATTCGAAGAAGAAGAGTAAGGGATGGAGCCAGTAGACCCTAAACTAGAGCCCTGGAACCATCCGGGAAGTCAGCCTAAAACTGCTTGTACCAAATGTTATTGTAAACGCTGTTGCTATCATTGCCAGTTGTGCTTTATAAACAAAGGCTTAGGCATCTCCTACGGCAGGAAGAAGCGACGACCCCGACGAAAGCCTTCTCCAAGCAATAAGGACCATCAAAATCCTATACCAAAGCAGTAAGTAGTAGTAATTAATATATGTAATGTTACCTTTAGTAATATTGGCAATAGTAGGACTGATAGTAGCTTTAATCTTAGCAATAGTTGTATGGACTATAGTATTCATAGAATATAAGAAAATTAAGAAGCAAAGGAAAATAGACTGGTTAATCAAAAGAATAAGTGAGAGAGCAGAAGACAGTGGCAATGAGAGTGATGGGGACACAGAGGAACTATCAGCACTTGTGGAGAGGGGGCATCTTGATTTTGGGGATGTTAATAATGTGTAAAGCTACAGATTTGTGGGTCACAGTATACTATGGAGTACCTGTGTGGAAAGATGCAGATACCATCCTATTTTGTGCATCAGATGCTAAAGCATATGATACAGAAGTGCATAATGTATGGGCCACACATGCCTGTGTACCCACAGACCCCAACCCACAAGAAATAAACCTGGAAAATGTAACAGAAAATTTTAATATGTGGAAAAATAACATGGTAGAGCAGATGCAAGAAGATATAATCAGCTTATGGGATCAAAGCCTAAAGCCATGTGTAAAATTAACCCCGCTCTGCGTCATTTTAAATTGTAGCAATGCCAATACCAGCACCCATAGCAATAGCAGTAGCACCCAGAGCCCCATTAATGAAGAAATAAAAAACTGCTCTTACAATACTACCACAATACTAAGAGATAAGACACAAAAAGTTTATTCACTGTTTTATAGACTTGATGTAGTACAACTTGATGAAAGTGAAAATAAGAATACATCAGGTAGTAATACTCTGTATAGACTAATAAATTGTAATACCTCAACCATCACACAAGCGTGTCCAAAGGTAACCTTTGAGCCAATTCCTATACATTATTGTGCCCCAGCTGGTTTTGCGATTCTAAAGTGTAAGGATCCGAGATTCAATGGAACAGGGTCATGCAAGAATGTTAGCTCAGTACAATGTACACATGGAATTAAACCAGTAGCATCAACTCAACTGCTGTTGAATGGCAGTCTAGCAGAAGGAGGGAAAATAATGATTAGATCTGAAAATATTACAAACAATGCCAAAAACATAATAGTTCAGTTTACTAAGCCTGTACTAATTACTTGTATCAGACCCAACAACAATACAAGAAAAAGTATACGCTTTGGACCAGGACAAGCCTTCTATACAAATGAAATAATAGGGGACATAAGACAAGCACATTGTAATATCAACAAAACATTATGGAATGACACTTTACAAAAGGTAGCTGAACAATTAAGAGAGAAATTCCCTAAGAAAACCATAATCTTTACTAACTCCTCAGGAGGGGACCCAGAAATTACAACACTTAGTTTTAATTGTGCAGGAGAATTTTTCTATTGCAATACAACAGGCCTGTTTAATGGTACGTGGTGGAACAATGGTACGTGGAACGGGCCCTACACACCTAATAACACCAATGGAAGTATAATCCTCCCATGCAGAATAAAACAAATTATAAACATGTGGCAGAGAGTAGGAAGAGCAATGTATGCCCCTCCCATTGCAGGAATAATAAAGTGTACATCAAACATTACAGGAATAATATTGACAAGAGATGGTGGTAACAATGGGACTAATGAGACCTTCAGACCTGGAGGAGGAGATATGAGGGACAATTGGAGAAGTGAATTATATAAATATAAAGTAGTAAAACTTGAACCACTAGGAGTAGCACCTACCAGGGCAAAAAGAAGAGTGGTGGAGAGAGAAAAAAGAGCAGTTGGACTGGGAGCTGTCTTCCTTGGGTTCTTGGGAGCAGCAGGAAGCACTATGGGCGCGGCGTCACTAACGCTGACGGTACAGGCCAGACAATTATTGTCTGGTATAGTGCAACAGCAAAGCAATTTGCTGCAGGCTATAGAAGCTCAACAGCATCTGTTGAAACTCACAGTCTGGGGCATTAAACAGCTCCAGGCGAGGGTCCTGGCTGTGGAAAGATACCTAAAGGATCAACAGCTCCTGGGAATTTGGGGCTGCTCTGGAAAACTCATCTGCGCCACTACTGTGCCCTGGAACACTAGTTGGAGTAATAAGTCTCAGGATGAGATTTGGGACAACATGACCTGGTTGCAATGGGATAAAGAAATTAGCAATTACACAAACATAATATATAGGTTACTTGAAGAATCGCAAAACCAGCAGGAAAAGAATGAGCAAGACTTATTGGCATTAGACAAATGGGCAGATTTGTGGAGTTGGTTCAACATTTCACACTGGCTGTGGTATATAAGAATATTTATAATGATAGTAGGAGGCTTGATAGGATTAAGAATAGTTTTTGCTATAATTACTGTAGTAAATAGAGTTAGGCAGGGATACTCACCTGTGTCATTTCAGATCCCTACCCCAAGCCCAGAGGGTCCCGACAGGCCCAGAGGAACCGAAGAAGGAGGTGGAGAGCAAGGCAGAGACAGATCGATTCGATTAGTGAACGGGTTCTTCGCACTTGCCTGGGACGACCTACGGAGCCTGTGCCTCTTCAGTTACCACCGCTTGAGAGATTGCATATTGATTGCAGCGAGGACTGTGGAACTTCTGGGACACTGCAGTCTCAAGGGACTGAGACTGGGGTGGGAAGGTCTCAAGAATCTGTGGAATCTTCTGTTATACTGGGGTCGGGAACTGAAGAATAGTGCTATTAGCTTATTTGATACTATAGCAGTAGCAGTAGCTGAGTGGACAGATAGGGTTATAGAAATAGGGCAAAGAGCTTTCAGAGCTATTCTCAACATACCTAGAAGAATCAGACAGGGCTTAGAAAGGGCTTTACTATAAAATGGGGGGCAAGTGGTCAAAAAGGAGCATACCAGGATGGCCTGCTATTAGGGAGAGAATGAGAAGAACTCCTCCAACAGCACAAAGAACAGAAGCAGTGTCTCCAGCAGCACCAGGAGTAGGAGCAGTGTCTCAAGATTTAGCTACTCATGGAGCAGTCACAAGCAGTAATACAGCAGCTACTAATCCTGATTGCGCCTGGGTGGAAGCGCAAGAAGAGGAGAGTGAAGTAGGCTTCCCAGTCAGGCCACAGGTACCTTTAAGGCCAATGACCTTCAAGGGAGCGTTTGATCTCAGCTTCTTTTTAAAAGAAAAGGGGGGACTGGATGGGTTAATTTACTCCCAGAAAAGACAAGACATCCTTGATATGTGGGTCTACCACACACAAGGCTACTTCCCTGATTGGCAGAATTACACACCAGGGCCAGGGATCAGATACCCATTAACATTTGGATGGTGCTTCAAGCTAGTACCAGTAGAGCCATCTGAGGTAGAAGAAGCTACTCAGGGAGAGAACAACAGCTTATTACACCCTATATGCCAACATGGAGTAGATGACCCTGAAAGAGAAGTGTTAAGATGGGAGTTTGATAGAAGCCTGGCACGGAGACACAGAGCCCGAGAGCTGCATCCGGAGTACTACAAAGACTGCTGACACAGAAGTTGCTGACGGGGACTTTCCGCTGGGGACTTTCCAGGGAGGTGTGGTGTGGGCGGAGTTGGGGAGTGGCTAACCCTCAGATGCTGCATATAAGCAGCTGCTTCTCGCATGTACTGGGTCTCTCTTGTTGGACCAGATAGAGCCCGGGAGCTCTCTGGCTAGCAGGGGAACCCACTGCTTAAGCCTCAATAAAGCTTGCCTTGAGAGCTTC
>A2.CD.97.97CDKFE4_AF286240_D.UG.99.99UGK09259_AF484498
CCAGCCAAAATTACCCTATAGTGCAGAATGCACAAGGGCAAATGGTACACCAGGCCCTATCACCTAGGACTTTAAATGCATGGGTCAAAGTAGTAGAAGAAAAGGCTTTCAGCCCAGAAGTAATACCCATGTTTTCAGCATTATCAGAAGGAGCCACCCCACAAGATTTAAATACTATGCTAAACACGGTGGGGGGACATCAAGCAGCTATGCAAATATTAAAAGATACCATCAATGAGGAAGCTGCAGAATGGGACAGGCTACATCCAGTACATGCAGGGCCTATTCCACCAGGCCAGATGAGAGAACCAAGGGGAAGTGACATAGCAGGAACTACTAGTACCCTTCAGGAACAAATAGGATGGATGACTAGCAACCCACCTATCCCAGTGGGAGAAATCTATAAAAGATGGATAATCCTGGGATTAAATAAGATAGTAAGAATGTATAGCCCTGTCAGTATTTTGGACATAAGACAAGGGCCAAAAGAACCCTTTAGAGACTATGTAGATAGGTTCTTTAAAACTCTCAGAGCTGAGCAAGCTACACAAGAGGTAAAAAACTGGATGACAGACACCTTGCTGGTCCAAAATGCGAACCCAGATTGTAAATCAATCCTGAAAGCATTAGGACCAGGGGCTACATTAGAAGAAATGATGACAGCATGTCAGGGAGTGGGGGGACCCGGCCATAAAGCAAGGGTTTTGGCTGAAGCAATGAGCCAATTACAAAATGCAACTCCAAACATAATGATGCAGAAAGGCAATTTTAGGGGTCAAAAAAGAATCAAATGTTTCAACTGTGGCAAGGAAGGACACCTAGCCAGAAATTGCAGGGCCCCTAGGAAAAAGGGCTGCTGGAAATGTGGGAAGGAAGGACATCAGATGAAAGACTGCACTGAGAGACAGGCTAATTTTTTAGGGAAAATTTGGCCTCCCAACAGAGGGAGGCCAGGAAATTTTCCCCAGAGCAGACCAGAGCCAACAGCCCCACCAGCAGAGGACTTTGGAATGGGGGAAGAGACAAAAAACAGGGAACCGCATACTCCTGCAATTTCCCTCAAATCACTCTTTGGCAGCGACCTCTTGTCACAGTAAAAATAGAAGGACAGCTAAGAGAAGCTCTATTAGATACAGGAGCAGATGATACAGTGTTAGAAGACATAAATTTGCCAGGAAAATGGAAACCAAAAATGATAGGGGGAATTGGAGGTTTTATCAAAGTAAGACAATATGATCAGATAGCTATAGAAATTTGTGGAAAAAGGGCCATAGGTACAGTATTAGTAGGACCTACACCTGTCAACATAATTGGAAGAAATATGTTGGTTCAGCTTGGTTGTACTTTAAATTTTCCAATAAGTCCTATTGAAACTGTACCAGTAAAATTAAAGCCAGGAATGGATGGCCCAAAGGTTAAACAATGGCCATTGACAGAAGAAAAAATAAAAGCATTAACAGAAATTTGTGGAGAAATGGAAAAGGAAGGAAAAATTTCAAAAATTGGGCCTGAAAACCCATACAACACTCCAGTGTTTGCTATAAAGAAAAAAGACAGCACTAAATGGAGAAAATTAGTAGATTTCAGAGAACTCAATAAGAGAACTCAAGACTTTTGGGAAGTTCAGTTAGGAATACCACATCCAGCAGGATTAAAAAAGAAAAAATCAGTAACAGTACTAGATGTGGGGGACGCATATTTTTCCGTTCCCTTAGATGAAGACTTCAGAAAGTATACTGCATTCACCATACCTAGTATAAACAATGAGTCACCAGGAATTAGGTATCAGTACAATGTACTTCCACAGGGATGGAAAGGATCACCATCAATATTCCAGAGTAGCATGACAAAAATTTTAGAGCCCTTTAGATCAAAATATCCAGAGATGGTTATATACCAGTACATGGATGACTTGTATGTAGGATCTGATTTGGAAATAGGTCAGCATAGAGCAAAAATAGAGGAATTAAGGGCTCATTTATTAAGATGGGGATTTACTACACCAGACAAAAAACATCAGAAAGAGCCCCCATTTCTTTGGATGGGATATGAGCTTCATCCTGACAAATGGACAGTCCAGCCTATAAAGCTGCCAGAAAAAGACAGCTGGACTGTCAATGATATACAGAAATTAGTAGGAAAGTTAAATTGGGCAAGTCAGATTTATGCAGGGATTAAAGTAAAGCAACTGTGTAGACTCCTTAGAGGAACCAAAGCACTAACAGACATAGTAACACTGACTAAAGAAGCAGAATTAGAATTGGAAGAGAACAGGGAGATTCTAAAAAACCCTGTACATGGGGTATACTATGACCCATCAAAAGACTTAATAGCAGAAATACAGAAACAAGGGCAAGATCAATGGACATATCAAATTTATCAAGAGCCATTTAAAAATCTAAAAACAGGGAAATATGCAAAAAAGAAATCCACACACACTAATGATGTAAAACAATTAACAGAAGCAGTACAAAAAATAGCCATAGAAAGCATAGTAATATGGGGAAAGACTCCTAAATTTAGATTACCCATACAAAAAGAAACATGGGAGACATGGTGGACGGAGTATTGGCAGGCTACCTGGATTCCTGAGTGGGAGTTTGTCAATACCCCTCCTCTAGTAAAACTATGGTACCAATTAGAAACAGAACCCCTAGCAGGAGCAGAAACTTTCTATGTAGATGGGGCAGCTAATAGAGAGACTAAACTAGGAAAGGCAGGGTATGTCACTGACAGAGGAAGACAAAAAATTGTCTCCCTGACGGAAACAACAAATCAAAAGACTGAATTACATGCAATCTATTTGGCTTTACAGGATTCAGGATTAGAAGTGAACATAGTGACAGATTCACAGTATGCATTAGGAATCATTCAGGCACAACCAGATAGGAGTGAATCAGAGTTAGTCAATCAAATAATAGAAAAGTTAATAGAAAAGGAAAGGGTCTACCTGGCATGGGTACCAGCACACAAAGGGATTGGAGGAAATGAACAGGTAGATAAATTAGTCAGTTCTGGAATCAGGAAAGTGCTATTTTTAGATGGGATAGATAAGGCTCAAGAAGAACATGAAAGATATCACAGTAATTGGAGAGCAATGGCTCAGGACTTTAATCTGCCACCTATAGTAGCAAAAGAAATAGTAGCTAGCTGTGATAAGTGTCAGCTAAAAGGGGAAGCCATGCATGGACAAGTAGATTGTAGTCCAGGAATATGGCAACTAGATTGTACACATCTAGAAGGAAAAGTTATCCTGGTAGCAGTCCATGTAGCCAGTGGCTACATAGAAGCAGAAGTTATTCCAGCAGAGACAGGACAGGAAACAGCATACTTTATATTAAAATTAGCAGGAAGATGGCCAGTAAAAGTGATACATACAGACAATGGGCCCAATTTCACTAGTGCAACAGTCAAGGCAGCCTGTTGGTGGGCAGGTGTCCAACAAGAATTTGGGATTCCCTACAATCCCCAAAGTCAAGGAGTAGTAGAATCTATGAATAAAGAATTAAAGAGAATCATAGGGCAGATAAGAGATCAAGCTGAACACCTTAAGACAGCAGTACAAATGGCAGTATTCATCCACAATTTTAAAAGAAAAGGGGGGATTGGGGGATACAGTGCAGGGGAAAGAATAATAGACATAATAGCAACAGACATACAAACTAAAGAATTACAAAAACAAATCACAAAAATTCAAAATTTTCGGGTTTATTACAGGGACAGCAGAGATCCAATTTGGAAAGGACCAGCAAAACTCCTCTGGAAAGGTGAAGGGGCAGTAGTAATACAAGACAACAGTGATATCAAGGTAGTACCAAGAAGAAAAGCAAAGATCATCAGGGATTATGGAAAACAGATGGCAGGTGATGATTGTGTGGCATGTAGACAGGATGAGGATTAGAACATGGAACAGTTTAGTAAAACATCATATATATGTTTCAAGGAAAGCTAAAGATTGGTCCTATAGACATCACTATGAAAGCAGACATCCAAAAGTAAGTTCAGAAGTACACATCCCGCTAGGGGAGGCTAGATTAGTAGTAAGAACATATTGGGGTCTGCAACCAGGAGAACAAGCCTGGCACTTGGGGCATGGGGTCTCCATAGAATGGAGGCAGAAAAGGTATAGTACACAAATAGACCCTGATCTGGCAGATCATCTAATCCATCTGTATTATTTTGACTGTTTTTCAGAATCTGCCATAAGGAAAGCCATATTAGGAGAAATAGTTAGCCCTAGGTGTGAATATCAAGCAGGACATAACAAGGTAGGATCGCTGCAGTACTTGGCATTGAAAGCATTAGTAGCTCCAACAAGGGCAAAGCCACCTTTACCTAGTGTTAAGAAATTAGTAGAGGATAGATGGAACAAGCCCCAGAAGACCAGGGGCCACAGAGGGAGCCATACAATGAATGGGTGTTAGAACTGTTAGAAGAGCTCAAGCAGGAGGCTGTTAGACATTTCCCTGGGCAGTGGCTACACGGCCTAGGACAACATATCTATAATACCTATGGGGATACTTGGGAAGGAGTTGAAGCTATAACAAGAACTCTGCAACAACTACTGTTTGTCCATTTCAGAATGGGGTGCCATCATAGCAGGATAGGTGTTACGCGACAGAGGAGAGCAAGGAATGGATCCAGTAGACCCTAAATTAGAGCCCTGGAACCATCCGGGAAGTCAGCCTAAAACTGCTTGTACCAAGTGTTATTGTAAAAAGTGTTGCTATCATTGCCCAGTGTGCTTTCTAAACAAGGGCTTAGGCATCTCCTATGGCAGGAAGAAGCGGAGACACCGACGAGGACCTGCTCAAAGCAGTAAGAATCATCAAAATCCTGTACCAAAGCAGTAAGTAGTAGTAATTAATAGATGTAATGATACCTTTAGCAATTTTGTCAATAGTAGGGCTGATAGTAGCATTAATCTTAGCAATAGTTATATGGACTATAGTATTTATAGAATATAGGAAAATTCAGAAGGAAAGGAAAATAGACAGGCTAATCAAGAGAATAAGTGAAAGAGCAGAAGACAGTGGCAATGAGAGTGATGGGGATACAGAGGAATTGTCCACCCTTATGGGGGTGGGAATCTTGCTTTTT
>A2.CY.94.94CY017_41_AF286237_F1.BR.93.93BR020_1_AF005494
TTGAAAAGCGAAAGTAACAGGGACTCGAAAGCGAAAGTTCCAGAGGAGTTCTCTCGACGCAGGACTCGGCTTGCTGAGGTGCACACGGCAAGAGGCGAGGGGCGGCGACTGGTGAGTACGCCTAATATTTTTGACTAGCAGAGGCTAGAAGGAGAGAGATGGGTGCGAGAGCGTCAATATTAAGCGGGGGAAAATTAGATGCTTGGGAGAAAATTCGGTTAAGGCCAGGGGGAAAGAAAAAATATAGACTGAAACATTTGGTATGGGCAAGCAGGGAGCTGGAGAAATTCTCAATTAACCCTGGCCTTTTAGAAACACCAGAGGGATGTAGACAAATAATAAGGCAGTTACAACCAGCTCTCCAAACAGGAACAGAAGAACTTAAATCATTATATAATACAGTAGTAGTCCTCTACTGGGTACATCAAAGGGTAGATGTAAAAGACACCAAGGAAGCTCTAGATAAAATAGAGGAAGAACAAAACAAGCAGAAAACACAGCATGCAGCAGCTGACACAGGGAACAGCAGCAGTCAAAATTATCCCATAGTGCAAAATGCACAAGGGCAAATGGTACACCAGGCTATATCACCTAGGACGTTGAATGCCTGGGTCAAAGTAGTAGAAGAAAAGGCTTTCAGCCCAGAAGTAATACCTATGTTTACAGCATTATCAGAAGGAGCCACCCCACAAGACTTAAATACTATGCTAAACACAGTGGGGGGACATCAAGCAGCTATGCAAATGTTAAAAGATACCATCAATGAGGAAGCTGCAGAATGGGACAGGGTACATCCAGTACATGCAGGGCCTATTCCACCAGGCCAGATGAGAGAACCAAGGGGAAGTGACATAGCAGGAACTACTAGTACCCTTCAGGAACAAATAGGTTGGATGACCAGCGATCCACCCATCCCAGTGGGAGAAATTTATAAAAGATGGATAATCCTGGGATTAAATAAAATAGTAAGAATGTATAGCCCTGTCAGCATTTTGGACATAAGACAAGGGCCAAAAGAACCCTTTAGAGATTATGTGGATAGGTTCTTTAAAACTCTAAGAGCTGAGCAAGCCACACAGGAGGTAAAAAACTGGATGACGGACACCTTGCTGGTCCAAAATGCGAACCCAGATTGTAGATCCATCTTGAGAGCATTAGGACCAGGGGCCTCATTAGAAGAAATGATGACAGCATGTCAGGGAGTGGGAGGACCCAGCCATAAAGCAAGGGTTTTGGCTGAAGCAATGAGCCATGTACAAAGTACAAATACAAACATAATGATGCAGAGAGGCAATTTTAGGGGTCAAAAAAGAATTAAGTGTTTCAACTGTGGCAAGGAAGGACACCTAGCCAGAAATTGCAGGGCCCCTAGGAAAAAGGGCTGCTGGAAATGTGGAAAGGAAGGACATCAAATGAAAGATTGCACTGAGAGACAGGCTAATTTTTTAGGGAAAATTTGGCCTTCCAACAAAGGGAGGCCAGGAAATTTTCCTCAGAGCAGAACAGAGCCAACAGCCCCACCAGCAGAGAACTTGAGAATGGGGGAAGAGATAACCTCCTCCCTGAAGCAGGAACTGGAGACCAGGGAACCATACAATCCTGCAATTTCCCTCAAATCACTCTTTGGCAACGACCCCTTGTTACAGTAAAGATAGAGGGACAGCTAAAAGAAGCTCTATTAGATACAGGAGCAGATGATACAGTGTTAGAAGAAATAAATTTGCCAGGAAAATGGAAACCAAAAATGATAGGGGGAATTGGAGGTTTTATCAAAGTAAGACAATATGATCAGATAGCTATAGAAATTTGTGGAAAAAGGGCCATAGGTACAGTATTAGTAGGACCTACCCCTGTCAACATAATCGGAAGAAATATGTTGGTTCAGCTTGGTTGTACTTTAAATTTTCCAATTAGTCCTATTGAAACTGTACCAGTAAAATTAAAGCCAGGAATGGATGGTCCAAAGGTTAAACAATGGCCATTGACAGAAGAAAAAATAAAAGCATTAACAGAAATCTGTAAAGAAATGGAAAAGGAAGGAAAAATTTCAAAAATTGGGCCTGAAAATCCATACAACACTCCAGTGTTTGCTATAAAGAAAAAAGACAGCACTAAATGGAGAAAATTAGTAGATTTTAGAGAACTCAATAAGAGAACTCAAGACTTCTGGGAAGTTCAGTTAGGAATACCACATCCAGCAGGATTAAAAAAGAAAAAAGCAGTAACAGTACTTGATGTGGGGGACGCATATTTTTCCGTTCCCTTACATGAAGACTTCAGAAAATATACTGCATTCACCATACCTAGTACCAACAATGAGACACCAGGAGTTAGGTATCAGTACAATGTACTTCCACAGGGATGGAAAGGATCACCAGCAATATTCCAGAGTAGCATGACAAAGATCTTAGAGCCCTTTAGATCAAAGAATACAGAATTAATCATCTACCAATACATGGATGACTTGTATGTAGGATCTGATTTAGAAATAAGCCAGCATAGAGTAAAAATAGAGGAATTAAGGGCTCACTTATTGAAATGGGGATTTTATACACCAGACAAAAAACATCAGAAAGAACCTCCATTTCTTTGGATGGGATATGAGCTTCATCCTGACAAATGGACAGTCCAGCCTATAAAGCTGCCAGAAAAAGACAGCTGGACTGTCAATGATATACAGAAATTAGTAGGGAAATTAAATTGGGCAAGTCAGATTTATGCAGGGATTAAAGTAAAGCAACTGTGTAAACTCCTTAGAGGAGCCAAAGCACTAACAGACATAGTAACACTGACTAAAGAAGCAGAGTTAGAATTAGAAGAGAACAGGGAAATTTTAAAAACCCCTGTACATGGGGTATACTATGACCCATCAAAAGACTTAATAGCAGAAATACAGAAACAAGGGCAAGACCAATGGACATATCAAATTTATCAGGAACCCTTTAAGAATCTGAAAACAGGGAAATATGCAAAAAGGAGGTCCACCCACACTAATGATATAAAACAGTTAACAGAAGCAGTACAAAAAATAACCATGGAAAGCATAGTGATATGGGGAAAGACTCCTAAATTTAAATTACCCATACAAAAGGAAACATGGGAGACATGGTGGGCGGAGTATTGGCAGGCTACCTGGATTCCTGAGTGGGAGTTTGTCAATACCCCTCCTCTAGTAAAACTGTGGTACCAGTTAGAAAAAGAACCCATAGCAGGAGCAGAAACTTTCTATGTAGATGGGGCAGCTAATAGAGAGACTAAACTAGGAAAGGCAGGGTATGTCACTGACAGAGGAAGACAAAAAATTGTCTCCCTGACGGAGACAACAAATCAAAAGACTGAATTACATGCAATCTATTTGGCTTTACAGGATTCAGGATTAGAAGTGAACATAGTGACAGATTCACAGTATGCATTAGGAATCATTCAAGCACAACCAGAAAGGAGTGAATCAGAGATAGTCAATCAAATAATAGAAAAATTAATAGAAAAGGAAAGGGTCTACCTATCATGGGTACCAGCACACAAAGGGATTGGAGGAAATGAACAAGTAGACAAATTAGTCAGTTCTGGAATCAGGAAAGTGCTATTTTTAGATGGGATAGATAAGGCTCAAGAGGAACATGAAAGATATCACAGCAATTGGAGAGCAATGGCTCATGACTTTAATCTACCACCTGTAGTAGCAAAAGAAATAGTAGCTAGCTGTGATAAATGTCAGCTAAAAGGGGAAGCCATGCATGGACAAGTAGACTGTAGTCCAGGAATATGGCAACTAGATTGCACACATCTTGAAGGAAAAGTTATCCTGGTGGCAGTCCATGTGGCCAGTGGCTATATAGAAGCAGAAGTCATCCCAACAGAAACAGGACAGGATACAGCATACTTTATATTAAAACTAGCAGGAAGATGGCCAGTAAAAGTAATACATACAGACAATGGGCCCAATTTCATCAGTGCAACAGTTAAGGCAGCCTGTTGGTGGGCAGGTATCCAACAAGAATTTGGGATTCCCTACAATCCCCAAAGTCAAGGAGTAGTGGAATCTATGAATAAAGAATTAAAGAAAATCATAGGGCAGGTAAGAGATCAAGCTGAACACCTTAAGACAGCAGTACAAATGGCAGTATTCATTCACAATTTTAAAAGAAAAGGGGGGATTGGGGGATACAGTGCAGGGGAAAGAATAATAGACATAATAGCAACAGATATACAAACTAAAGAACTACAAAGACAAATTACAAAAATTCAAAATTTTCGGGTTTATTACAGGGACAGCAGAGATCCAATTTGGAAAGGACCAGCAAAACTCCTTTGGAAAGGTGAAGGGGCAGTAGTAATACAAGACAATAGTGACATAAAGGTAGTACCAAGAAGAAAAGCAAAGATCATTAGGGATTATGGAAAACAGATGGCAGGTGATGATTGTGTGGCAGGTAGACAGGATGAGGATTAGAACATGGAACAGTTTAGTTAAACATCATATGTATATTTCAAGGAAAGCTAAAGGTTGGGTCTATAAACATCACTATGAAAGCAGAAATCCAAAAATAAGTTCAGAAGTACACATCCCACTAGAGACAGCTGAATTAGTAATAACAACATACTGGGGGCTGCTTCCAGGAGAAAGAGAATGGCATCTGGGTCAGGGAGTCTCCATAGAATGGAGGCAGGGGAGGTATAGAACACAAATAGACCCTGATCTGGCAGACCATCTAATCCATCTGTATTATTTTGACTGTTTTTCAGAATCTGCCATAAGGAAAGCCATAATAGGAGAAATAGTTAGTCCTAGGTGTGAATATCAAGCAGGACATAACAAGGTAGGGTCTCTGCAATATTTGGCATTGAAAGCAGTAGTAGCTTCAACAAGGACAAAGCCACCTTTGCCTAGTGTTAGGAAATTAGTAGAGGATAGATGGAACAAGCCCCAGAAGACCAAGGGCCACAGAGGGAGCCATACAATGAATGGATGTTAGAACTGTTAGAGGAGCTCAAGCAGGAAGCTGTTAGACATTTCCCTAGGCACTGGCTACATGGCCTAGGACAATACATCTATAATACCTATGGGGATACCTGGGAAGGAGTTGAAGTTATCATAAGATATCTGCAACAACTACTGTTTGTCCATTTCAGAATTGGGTGCCAACATAGCAGGATAGGCATTATTCGAAGAAGAAGAGTAAGGGATGGAGCCAGTAGACCCTAAACTAGAGCCCTGGAACCATCCGGGAAGTCAGCCTAAAACTGCTTGTACCAAATGTTATTGTAAACGCTGTTGCTATCATTGCCAGTTGTGCTTTATAAACAAAGGCTTAGGCATCTCCTACGGCAGGAAGAAGCGACGACCCCGACGAAAGCCTTCTCCAAGCAATAAGGACCATCAAAATCCTATACCAAAGCAGTAAGTAGTAGTAATTAATATATGTAATGTTACCTTTAGTAATATTGGCAATAGTAGGACTGATAGTAGCTTTAATCTTAGCAATAGTTGTATGGACTATAGTATTCATAGAATATAAGAAAATTAAGAAGCAAAGGAAAATAGACTGGTTAATCAAAAGAATAAGTGAGAGAGCAGAAGACAGTGGCAATGAGAGTGATGGGGACACAGAGGAACTATCAGCACTTGTGGAGAGGGGGCATCTTGATTTTGGGGATGTTAATAATGTGTAAAGCTACAGATTTGTGGGTCACAGTATACTATGGAGTACCTGTGTGGAAAGATGCAGATACCATCCTATTTTGTGCATCAGATGCTAAAGCATATGATACAGAAGTGCATAATGTATGGGCCACACATGCCTGTGTACCCACAGACCCCAACCCACAAGAAATAAACCTGGAAAATGTAACAGAAAATTTTAATATGTGGAAAAATAACATGGTAGAGCAGATGCAAGAAGATATAATCAGCTTATGGGATCAAAGCCTAAAGCCATGTGTAAAATTAACCCCGCTCTGCGTCATTTTAAATTGTAGCAATGCCAATACCAGCACCCATAGCAATAGCAGTAGCACCCAGAGCCCCATTAATGAAGAAATAAAAAACTGCTCTTACAATACTACCACAATACTAAGAGATAAGACACAAAAAGTTTATTCACTGTTTTATAGACTTGATGTAGTACAACTTGATGAAAGTGAAAATAAGAATACATCAGGTAGTAATACTCTGTATAGACTAATAAATTGTAATACCTCAACCATCACACAAGCGTGTCCAAAGGTAACCTTTGAGCCAATTCCTATACATTATTGTGCCCCAGCTGGTTTTGCGATTCTAAAGTGTAAGGATCCGAGATTCAATGGAACAGGGTCATGCAAGAATGTTAGCTCAGTACAATGTACACATGGAATTAAACCAGTAGCATCAACTCAACTGCTGTTGAATGGCAGTCTAGCAGAAGGAGGGAAAATAATGATTAGATCTGAAAATATTACAAACAATGCCAAAAACATAATAGTTCAGTTTACTAAGCCTGTACTAATTACTTGTATCAGACCCAACAACAATACAAGAAAAAGTATACGCTTTGGACCAGGACAAGCCTTCTATACAAATGAAATAATAGGGGACATAAGACAAGCACATTGTAATATCAACAAAACATTATGGAATGACACTTTACAAAAGGTAGCTGAACAATTAAGAGAGAAATTCCCTAAGAAAACCATAATCTTTACTAACTCCTCAGGAGGGGACCCAGAAATTACAACACTTAGTTTTAATTGTGCAGGAGAATTTTTCTATTGCAATACAACAGGCCTGTTTAATGGTACGTGGTGGAACAATGGTACGTGGAACGGGCCCTACACACCTAATAACACCAATGGAAGTATAATCCTCCCATGCAGAATAAAACAAATTATAAACATGTGGCAGAGAGTAGGAAGAGCAATGTATGCCCCTCCCATTGCAGGAATAATAAAGTGTACATCAAACATTACAGGAATAATATTGACAAGAGATGGTGGTAACAATGGGACTAATGAGACCTTCAGACCTGGAGGAGGAGATATGAGGGACAATTGGAGAAGTGAATTATATAAATATAAAGTAGTAAAACTTGAACCACTAGGAGTAGCACCTACCAGGGCAAAAAGAAGAGTGGTGGAGAGAGAAAAAAGAGCAGTTGGACTGGGAGCTGTCTTCCTTGGGTTCTTGGGAGCAGCAGGAAGCACTATGGGCGCGGCGTCACTAACGCTGACGGTACAGGCCAGACAATTATTGTCTGGTATAGTGCAACAGCAAAGCAATTTGCTGCAGGCTATAGAAGCTCAACAGCATCTGTTGAAACTCACAGTCTGGGGCATTAAACAGCTCCAGGCGAGGGTCCTGGCTGTGGAAAGATACCTAAAGGATCAACAGCTCCTGGGAATTTGGGGCTGCTCTGGAAAACTCATCTGCGCCACTACTGTGCCCTGGAACACTAGTTGGAGTAATAAGTCTCAGGATGAGATTTGGGACAACATGACCTGGTTGCAATGGGATAAAGAAATTAGCAATTACACAAACATAATATATAGGTTACTTGAAGAATCGCAAAACCAGCAGGAAAAGAATGAGCAAGACTTATTGGCATTAGACAAATGGGCAGATTTGTGGAGTTGGTTCAACATTTCACACTGGCTGTGGTATATAAGAATATTTATAATGATAGTAGGAGGCTTGATAGGATTAAGAATAGTTTTTGCTATAATTACTGTAGTAAATAGAGTTAGGCAGGGATACTCACCTGTGTCATTTCAGATCCCTACCCCAAGCCCAGAGGGTCCCGACAGGCCCAGAGGAACCGAAGAAGGAGGTGGAGAGCAAGGCAGAGACAGATCGATTCGATTAGTGAACGGGTTCTTCGCACTTGCCTGGGACGACCTACGGAGCCTGTGCCTCTTCAGTTACCACCGCTTGAGAGATTGCATATTGATTGCAGCGAGGACTGTGGAACTTCTGGGACACTGCAGTCTCAAGGGACTGAGACTGGGGTGGGAAGGTCTCAAGAATCTGTGGAATCTTCTGTTATACTGGGGTCGGGAACTGAAGAATAGTGCTATTAGCTTATTTGATACTATAGCAGTAGCAGTAGCTGAGTGGACAGATAGGGTTATAGAAATAGGGCAAAGAGCTTTCAGAGCTATTCTCAACATACCTAGAAGAATCAGACAGGGCTTAGAAAGGGCTTTACTATAAAATGGGGGGCAAGTGGTCAAAAAGGAGCATACCAGGATGGCCTGCTATTAGGGAGAGAATGAGAAGAACTCCTCCAACAGCACAAAGAACAGAAGCAGTGTCTCCAGCAGCACCAGGAGTAGGAGCAGTGTCTCAAGATTTAGCTACTCATGGAGCAGTCACAAGCAGTAATACAGCAGCTACTAATCCTGATTGCGCCTGGGTGGAAGCGCAAGAAGAGGAGAGTGAAGTAGGCTTCCCAGTCAGGCCACAGGTACCTTTAAGGCCAATGACCTTCAAGGGAGCGTTTGATCTCAGCTTCTTTTTAAAAGAAAAGGGGGGACTGGATGGGTTAATTTACTCCCAGAAAAGACAAGACATCCTTGATATGTGGGTCTACCACACACAAGGCTACTTCCCTGATTGGCAGAATTACACACCAGGGCCAGGGATCAGATACCCATTAACATTTGGATGGTGCTTCAAGCTAGTACCAGTAGAGCCATCTGAGGTAGAAGAAGCTACTCAGGGAGAGAACAACAGCTTATTACACCCTATATGCCAACATGGAGTAGATGACCCTGAAAGAGAAGTGTTAAGATGGGAGTTTGATAGAAGCCTGGCACGGAGACACAGAGCCCGAGAGCTGCATCCGGAGTACTACAAAGACTGCTGACACAGAAGTTGCTGACGGGGACTTTCCGCTGGGGACTTTCCAGGGAGGTGTGGTGTGGGCGGAGTTGGGGAGTGGCTAACCCTCAGATGCTGCATATAAGCAGCTGCTTCTCGCATGTACTGGGTCTCTCTTGTTGGACCAGATAGAGCCCGGGAGCTCTCTGGCTAGCAGGGGAACCCACTGCTTAAGCCTCAATAAAGCTTGCCTTGAGAGCTTC
>A2.CY.94.94CY017_41_AF286237_F2.CM.02.02CM_0016BBY_AY371158
TTGAAAAGCGAAAGTAACAGGGACTCGAAAGCGAAAGTTCCAGAGGAGTTCTCTCGACGCAGGACTCGGCTTGCTGAGGTGCACACGGCAAGAGGCGAGGGGCGGCGACTGGTGAGTACGCCTAATATTTTTGACTAGCAGAGGCTAGAAGGAGAGAGATGGGTGCGAGAGCGTCAATATTAAGCGGGGGAAAATTAGATGCTTGGGAGAAAATTCGGTTAAGGCCAGGGGGAAAGAAAAAATATAGACTGAAACATTTGGTATGGGCAAGCAGGGAGCTGGAGAAATTCTCAATTAACCCTGGCCTTTTAGAAACACCAGAGGGATGTAGACAAATAATAAGGCAGTTACAACCAGCTCTCCAAACAGGAACAGAAGAACTTAAATCATTATATAATACAGTAGTAGTCCTCTACTGGGTACATCAAAGGGTAGATGTAAAAGACACCAAGGAAGCTCTAGATAAAATAGAGGAAGAACAAAACAAGCAGAAAACACAGCATGCAGCAGCTGACACAGGGAACAGCAGCAGTCAAAATTATCCCATAGTGCAAAATGCACAAGGGCAAATGGTACACCAGGCTATATCACCTAGGACGTTGAATGCCTGGGTCAAAGTAGTAGAAGAAAAGGCTTTCAGCCCAGAAGTAATACCTATGTTTACAGCATTATCAGAAGGAGCCACCCCACAAGACTTAAATACTATGCTAAACACAGTGGGGGGACATCAAGCAGCTATGCAAATGTTAAAAGATACCATCAATGAGGAAGCTGCAGAATGGGACAGGGTACATCCAGTACATGCAGGGCCTATTCCACCAGGCCAGATGAGAGAACCAAGGGGAAGTGACATAGCAGGAACTACTAGTACCCTTCAGGAACAAATAGGTTGGATGACCAGCGATCCACCCATCCCAGTGGGAGAAATTTATAAAAGATGGATAATCCTGGGATTAAATAAAATAGTAAGAATGTATAGCCCTGTCAGCATTTTGGACATAAGACAAGGGCCAAAAGAACCCTTTAGAGATTATGTGGATAGGTTCTTTAAAACTCTAAGAGCTGAGCAAGCCACACAGGAGGTAAAAAACTGGATGACGGACACCTTGCTGGTCCAAAATGCGAACCCAGATTGTAGATCCATCTTGAGAGCATTAGGACCAGGGGCCTCATTAGAAGAAATGATGACAGCATGTCAGGGAGTGGGAGGACCCAGCCATAAAGCAAGGGTTTTGGCTGAAGCAATGAGCCATGTACAAAGTACAAATACAAACATAATGATGCAGAGAGGCAATTTTAGGGGTCAAAAAAGAATTAAGTGTTTCAACTGTGGCAAGGAAGGACACCTAGCCAGAAATTGCAGGGCCCCTAGGAAAAAGGGCTGCTGGAAATGTGGAAAGGAAGGACATCAAATGAAAGATTGCACTGAGAGACAGGCTAATTTTTTAGGGAAAATTTGGCCTTCCAACAAAGGGAGGCCAGGAAATTTTCCTCAGAGCAGAACAGAGCCAACAGCCCCACCAGCAGAGAACTTGAGAATGGGGGAAGAGATAACCTCCTCCCTGAAGCAGGAACTGGAGACCAGGGAACCATACAATCCTGCAATTTCCCTCAAATCACTCTTTGGCAACGACCCCTTGTTACAGTAAAGATAGAGGGACAGCTAAAAGAAGCTCTATTAGATACAGGAGCAGATGATACAGTGTTAGAAGAAATAAATTTGCCAGGAAAATGGAAACCAAAAATGATAGGGGGAATTGGAGGTTTTATCAAAGTAAGACAATATGATCAGATAGCTATAGAAATTTGTGGAAAAAGGGCCATAGGTACAGTATTAGTAGGACCTACCCCTGTCAACATAATCGGAAGAAATATGTTGGTTCAGCTTGGTTGTACTTTAAATTTTCCAATTAGTCCTATTGAAACTGTACCAGTAAAATTAAAGCCAGGAATGGATGGTCCAAAGGTTAAACAATGGCCATTGACAGAAGAAAAAATAAAAGCATTAACAGAAATCTGTAAAGAAATGGAAAAGGAAGGAAAAATTTCAAAAATTGGGCCTGAAAATCCATACAACACTCCAGTGTTTGCTATAAAGAAAAAAGACAGCACTAAATGGAGAAAATTAGTAGATTTTAGAGAACTCAATAAGAGAACTCAAGACTTCTGGGAAGTTCAGTTAGGAATACCACATCCAGCAGGATTAAAAAAGAAAAAAGCAGTAACAGTACTTGATGTGGGGGACGCATATTTTTCCGTTCCCTTACATGAAGACTTCAGAAAATATACTGCATTCACCATACCTAGTACCAACAATGAGACACCAGGAGTTAGGTATCAGTACAATGTACTTCCACAGGGATGGAAAGGATCACCAGCAATATTCCAGAGTAGCATGACAAAGATCTTAGAGCCCTTTAGATCAAAGAATACAGAATTAATCATCTACCAATACATGGATGACTTGTATGTAGGATCTGATTTAGAAATAAGCCAGCATAGAGTAAAAATAGAGGAATTAAGGGCTCACTTATTGAAATGGGGATTTTATACACCAGACAAAAAACATCAGAAAGAACCTCCATTTCTTTGGATGGGATATGAGCTTCATCCTGACAAATGGACAGTCCAGCCTATAAAGCTGCCAGAAAAAGACAGCTGGACTGTCAATGATATACAGAAATTAGTAGGGAAATTAAATTGGGCAAGTCAGATTTATGCAGGGATTAAAGTAAAGCAACTGTGTAAACTCCTTAGAGGAGCCAAAGCACTAACAGACATAGTAACACTGACTAAAGAAGCAGAGTTAGAATTAGAAGAGAACAGGGAAATTTTAAAAACCCCTGTACATGGGGTATACTATGACCCATCAAAAGACTTAATAGCAGAAATACAGAAACAAGGGCAAGACCAATGGACATATCAAATTTATCAGGAACCCTTTAAGAATCTGAAAACAGGGAAATATGCAAAAAGGAGGTCCACCCACACTAATGATATAAAACAGTTAACAGAAGCAGTACAAAAAATAACCATGGAAAGCATAGTGATATGGGGAAAGACTCCTAAATTTAAATTACCCATACAAAAGGAAACATGGGAGACATGGTGGGCGGAGTATTGGCAGGCTACCTGGATTCCTGAGTGGGAGTTTGTCAATACCCCTCCTCTAGTAAAACTGTGGTACCAGTTAGAAAAAGAACCCATAGCAGGAGCAGAAACTTTCTATGTAGATGGGGCAGCTAATAGAGAGACTAAACTAGGAAAGGCAGGGTATGTCACTGACAGAGGAAGACAAAAAATTGTCTCCCTGACGGAGACAACAAATCAAAAGACTGAATTACATGCAATCTATTTGGCTTTACAGGATTCAGGATTAGAAGTGAACATAGTGACAGATTCACAGTATGCATTAGGAATCATTCAAGCACAACCAGAAAGGAGTGAATCAGAGATAGTCAATCAAATAATAGAAAAATTAATAGAAAAGGAAAGGGTCTACCTATCATGGGTACCAGCACACAAAGGGATTGGAGGAAATGAACAAGTAGACAAATTAGTCAGTTCTGGAATCAGGAAAGTGCTATTTTTGGATGGAATAGATAAGGCTCAAGAAGAACATGAAAAATATCACAACAATTGGAGAGCAATGGCTAGTGATTTTAATCTGCCACCTATAGTAGCAAAAGAAATAGTAGCCAGCTGTGATAAATGTCAGTTAAAAGGGGAAGCCATACATGGACAAGTAGACTGTAGTCCAGGAATATGGCAACTAGATTGCACACATCTTGAAGGAAAAGTTATCCTGGTGGCAGTCCATGTGGCCAGTGGCTATATAGAAGCAGAAGTCATCCCAACAGAAACAGGACAGGATACAGCATACTTTATATTAAAACTAGCAGGAAGATGGCCAGTAAAAGTAATACATACAGACAATGGGCCCAATTTCATCAGTGCAACAGTTAAGGCAGCCTGTTGGTGGGCAGGTATCCAACAAGAATTTGGGATTCCCTACAATCCCCAAAGTCAAGGAGTAGTGGAATCTATGAATAAAGAATTAAAGAAAATCATAGGGCAGGTAAGAGATCAAGCTGAACACCTTAAGACAGCAGTACAAATGGCAGTATTCATTCACAATTTTAAAAGAAAAGGGGGGATTGGGGGATACAGTGCAGGGGAAAGAATAATAGACATAATAGCAACAGATATACAAACTAAAGAACTACAAAGACAAATTACAAAAATTCAAAATTTTCGGGTTTATTACAGGGACAGCAGAGATCCAATTTGGAAAGGACCAGCAAAACTCCTTTGGAAAGGTGAAGGGGCAGTAGTAATACAAGACAATAGTGACATAAAGGTAGTACCAAGAAGAAAAGCAAAGATCATTAGGGATTATGGAAAACAGATGGCAGGTGATGATTGTGTGGCAGGTAGACAGGATGAGGATTAGAACATGGAACAGTTTAGTTAAACATCATATGTATATTTCAAGGAAAGCTAAAGGTTGGGTCTATAAACATCACTATGAAAGCAGAAATCCAAGAATAAGTTCAGAAGTACACATCCCGCTAGGGGAGGCTAGAATAATAGTAAGAACATATTGGGGTCTGCACATAGGAGAAAAAGACTGGCACTTGGGTCATGGAGTCTCCATAGAATGGAGGCAAAACAGGTATCATACACAAATAGACCCTGATCTGGCAGACCATCTAATCCATCTGTATTATTTTGACTGTTTTTCAGAATCTGCCATAAGGAAAGCCATAATAGGAGAAATAGTTAGTCCTAGGTGTGAATATCAAGCAGGACATAACAAGGTAGGGTCTCTGCAATATTTGGCATTGAAAGCAGTAGTAGCTTCAACAAGGACAAAGCCACCTTTGCCTAGTGTTAGGAAATTAGTAGAGGATAGATGGAACAAGCCCCAGAAGACCAAGGGCCACAGAGGGAGCCATACAATGAATGGATGTTAGAACTGTTAGAGGAGCTCAAGCAGGAAGCTGTTAGACATTTCCCTAGGCACTGGCTACATGGCCTAGGACAATACATCTATAATACCTATGGGGATACCTGGGAAGGAGTTGAAGTTATCATAAGATATCTGCAACAACTACTGTTTGTCCATTTCAGAATTGGGTGCCAACATAGCAGGATAGGCATTATTCGAAGAAGAAGAGTAAGGGATGGAGCCAGTAGACCCTAAACTAGAGCCCTGGAACCATCCGGGAAGTCAGCCTAAAACTGCTTGTACCAAATGTTATTGTAAACGCTGTTGCTATCATTGCCAGTTGTGCTTTATAAACAAAGGCTTAGGCATCTCCTACGGCAGGAAGAAGCGACGACCCCGACGAAAGCCTTCTCCAAGCAATAAGGACCATCAAAATCCTATACCAAAGCAGTAAGTAGTAGTAATTAATATATGTAATGTTACCTTTAGTAATATTGGCAATAGTAGGACTGATAGTAGCTTTAATCTTAGCAATAGTTGTATGGACTATAGTATTCATAGAATATAAGAAAATTAAGAAGCAAAGGAAAATAGACTGGTTAATCAAAAGAATAAGTGAGAGAGCAGAAGACAGTGGCAATGAGAGTGATGGGGACACAGAGGAACTATCAGCACTTGTGGAGAGGGGGCATCTTGATTTTGGGGATGTTAATAATGTGTAAAGCTACAGATTTGTGGGTCACAGTATACTATGGAGTACCTGTGTGGAAAGATGCAGATACCATCCTATTTTGTGCATCAGATGCTAAAGCATATGATACAGAAGTGCATAATGTATGGGCCACACATGCCTGTGTACCCACAGACCCCAACCCACAAGAAATAAACCTGGAAAATGTAACAGAAAATTTTAATATGTGGAAAAATAACATGGTAGAGCAGATGCAAGAAGATATAATCAGCTTATGGGATCAAAGCCTAAAGCCATGTGTAAAATTAACCCCGCTCTGCGTCATTTTAAATTGTAGCAATGCCAATACCAGCACCCATAGCAATAGCAGTAGCACCCAGAGCCCCATTAATGAAGAAATAAAAAACTGCTCTTACAATACTACCACAATACTAAGAGATAAGACACAAAAAGTTTATTCACTGTTTTATAGACTTGATGTAGTACAACTTGATGAAAGTGAAAATAAGAATACATCAGGTAGTAATACTCTGTATAGACTAATAAATTGTAATACCTCAACCATCACACAAGCGTGTCCAAAGGTAACCTTTGAGCCAATTCCTATACATTATTGTGCCCCAGCTGGTTTTGCGATTCTAAAGTGTAAGGATCCGAGATTCAATGGAACAGGGTCATGCAAGAATGTTAGCTCAGTACAATGTACACATGGAATTAAACCAGTAGCATCAACTCAACTGCTGTTGAATGGCAGTCTAGCAGAAGGAGGGAAAATAATGATTAGATCTGAAAATATTACAAACAATGCCAAAAACATAATAGTTCAGTTTACTAAGCCTGTACTAATTACTTGTATCAGACCCAACAACAATACAAGAAAAAGTATACGCTTTGGACCAGGACAAGCCTTCTATACAAATGAAATAATAGGGGACATAAGACAAGCACATTGTAATATCAACAAAACATTATGGAATGACACTTTACAAAAGGTAGCTGAACAATTAAGAGAGAAATTCCCTAAGAAAACCATAATCTTTACTAACTCCTCAGGAGGGGACCCAGAAATTACAACACTTAGTTTTAATTGTGCAGGAGAATTTTTCTATTGCAATACAACAGGCCTGTTTAATGGTACGTGGTGGAACAATGGTACGTGGAACGGGCCCTACACACCTAATAACACCAATGGAAGTATAATCCTCCCATGCAGAATAAAACAAATTATAAACATGTGGCAGAGAGTAGGAAGAGCAATGTATGCCCCTCCCATTGCAGGAATAATAAAGTGTACATCAAACATTACAGGAATAATATTGACAAGAGATGGTGGTAACAATGGGACTAATGAGACCTTCAGACCTGGAGGAGGAGATATGAGGGACAATTGGAGAAGTGAATTATATAAATATAAAGTAGTAAAACTTGAACCACTAGGAGTAGCACCTACCAGGGCAAAAAGAAGAGTGGTGGAGAGAGAAAAAAGAGCAGTTGGACTGGGAGCTGTCTTCCTTGGGTTCTTGGGAGCAGCAGGAAGCACTATGGGCGCGGCGTCACTAACGCTGACGGTACAGGCCAGACAATTATTGTCTGGTATAGTGCAACAGCAAAGCAATTTGCTGCAGGCTATAGAAGCTCAACAGCATCTGTTGAAACTCACAGTCTGGGGCATTAAACAGCTCCAGGCGAGGGTCCTGGCTGTGGAAAGATACCTAAAGGATCAACAGCTCCTGGGAATTTGGGGCTGCTCTGGAAAACTCATCTGCGCCACTACTGTGCCCTGGAACACTAGTTGGAGTAATAAGTCTCAGGATGAGATTTGGGACAACATGACCTGGTTGCAATGGGATAAAGAAATTAGCAATTACACAAACATAATATATAGGTTACTTGAAGAATCGCAAAACCAGCAGGAAAAGAATGAGCAAGACTTATTGGCATTAGACAAATGGGCAGATTTGTGGAGTTGGTTCAACATTTCACACTGGCTGTGGTATATAAGAATATTTATAATGATAGTAGGAGGCTTGATAGGATTAAGAATAGTTTTTGCTATAATTACTGTAGTAAATAGAGTTAGGCAGGGATACTCACCTGTGTCATTTCAGATCCCTACCCCAAGCCCAGAGGGTCCCGACAGGCCCAGAGGAACCGAAGAAGGAGGTGGAGAGCAAGGCAGAGACAGATCGATTCGATTAGTGAACGGGTTCTTCGCACTTGCCTGGGACGACCTACGGAGCCTGTGCCTCTTCAGTTACCACCGCTTGAGAGATTGCATATTGATTGCAGCGAGGACTGTGGAACTTCTGGGACACTGCAGTCTCAAGGGACTGAGACTGGGGTGGGAAGGTCTCAAGAATCTGTGGAATCTTCTGTTATACTGGGGTCGGGAACTGAAGAATAGTGCTATTAGCTTATTTGATACTATAGCAGTAGCAGTAGCTGAGTGGACAGATAGGGTTATAGAAATAGGGCAAAGAGCTTTCAGAGCTATTCTCAACATACCTAGAAGAATCAGACAGGGCTTAGAAAGGGCTTTACTATAAAATGGGGGGCAAGTGGTCAAAAAGGAGCATACCAGGATGGCCTGCTATTAGGGAGAGAATGAGAAGAACTCCTCCAACAGCACAAAGAACAGAAGCAGTGTCTCCAGCAGCACCAGGAGTAGGAGCAGTGTCTCAAGATTTAGCTACTCATGGAGCAGTCACAAGCAGTAATACAGCAGCTACTAATCCTGATTGCGCCTGGGTGGAAGCGCAAGAAGAGGAGAGTGAAGTAGGCTTCCCAGTCAGGCCACAGGTACCTTTAAGGCCAATGACCTTCAAGGGAGCGTTTGATCTCAGCTTCTTTTTAAAAGAAAAGGGGGGACTGGATGGGTTAATTTACTCCCAGAAAAGACAAGACATCCTTGATATGTGGGTCTACCACACACAAGGCTACTTCCCTGATTGGCAGAATTACACACCAGGGCCAGGGATCAGATACCCATTAACATTTGGATGGTGCTTCAAGCTAGTACCAGTAGAGCCATCTGAGGTAGAAGAAGCTACTCAGGGAGAGAACAACAGCTTATTACACCCTATATGCCAACATGGAGTAGATGACCCTGAAAGAGAAGTGTTAAGATGGGAGTTTGATAGAAGCCTGGCACGGAGACACAGAGCCCGAGAGCTGCATCCGGAGTACTACAAAGACTGCTGACACAGAAGTTGCTGACGGGGACTTTCCGCTGGGGACTTTCCAGGGAGGTGTGGTGTGGGCGGAGTTGGGGAGTGGCTAACCCTCAGATGCTGCATATAAGCAGCTGCTTCTCGCATGTACTGGGTCTCTCTTGTTGGACCAGATAGAGCCCGGGAGCTCTCTGGCTAGCAGGGGAACCCACTGCTTAAGCCTCAATAAAGCTTGCCTTGAGAGCTTC
>A2.CD.97.97CDKTB48_AF286238_G.SE.93.SE6165_AF061642
TTTTTCGAAGCGAAGTACCAGGGAAGTTCTCTCGACGCAAGACTCGGCTTGCTGAGGTGCACACGGCAAGAGGCGAGAAGCGACGGCTGGTGAGTACGCCTAAAATTTTTGACTAGCGGAGGCTAGAAGGAGAGAGATGGGTGCGAGAGCGTCAGTATTGAGCGGCGGAAAATTAGAAGCTTGGGAGAAAATTCGGTTAAGGCCAGGGGGAAAGAAAAAATATAGACTGAAACATTTAGTATGGGCAAGCAGGGAGCTGGAAAAATTCTCAATCAACCCCAGCCTTTTAGAAACAGAAACAGGATGTAGACGAATATTTGGGCAATTACAACCAGCTCTCGAGACAGGAACAGAAGAACTTAGATCATTATATAATACAATAGCAGTCCTCTACTTTGTTCATCAAAAGATAGAGGTAAAAGACACCAAGGAAGCTCTAGATAAAATAGAGGAAGAACAAAACAAATGCAAGCAGAAGACACAGCAGGCAGCAGCTGACACAGGAAGCAGCAGCAGTCAAAATTACAGAGGTAGCAGCAGTCAAAATTACCCTATAGTGCAAAATGCACAAGGGCAAATGGTACACCAGGCCGTGTCACCTAGGACTTTGAATGCATGGGTCAAAGTAGTTGAAGAGAAGGCTTTTAGCCCAGAAGTAATACCCATGTTTACAGCATTATCAGAAGGAGCCACCCCACAAGACTTAAATACTATGCTAAACACAGTGGGGGGACATCAAGCAGCTATGCAAATGTTAAAAGATACCATCAATGAGGAAGCTGCAGAATGGGACAGGTTACATCCAGTACAGGCAGGGCCTATTCCACCAGGCCAGATGAGAGAACCAAGGGGAAGTGACATAGCGGGAGCTACTAGTAACCTTCAGGAACAAATAGGATGGATGACCAGCAACCCACCTATTCCAGTGGGAGAAATCTATAAAAGATGGATAATCCTGGGATTAAATAAAATAGTAAGAATGTATAGCCCTGTCAGCATTTTGGACATAAAACAAGGGCCAAAAGAACCCTTTAGAGACTATGTAGATAGGTTCTTTAAAACTCTCAGAGCTGAGCAAGCTACACAGGAGGTAAAAAATTGGATGACAGACACCTTGCTGGTCCAAAATGCAAACCCAGATTGTAAATCCATCTTGAGGGCATTAGGACCAGGGGCTACATTAGAAGAAATGATGACAGCATGTCAGGGAGTGGGAGGACCCGGCCATAAAGCAAGGGTTTTAGCTGAAGCAATGAGCCAAGTACAAAATACAAACATAATGATACAGAGAGGCAATTTTAAGGGTCAAAAAAGAATTAAGTGTTTCAACTGTGGCAAGGAAGGACACCTAGCTAGAAATTGCAGGGCCCCTAGGAAAAAGGGCTGCTGGAAATGTGGGAAGGAAGGACATCAAATGAAAGACTGCACTGAGAGACAGGCTAATTTTTTAGGGAAAATTTGGCCTTCCAACAAAGGGAGGCCAGGGAATTTTCCTCAGAGCAGGACAGAGCCAACAGCCCCACCAATGGAAGAGGAGATAGCCCCCTCCCCGAAGCAGGAGATGAAGGAAAAGGAGCTATATCCCTCCCTCAAATCACTCTTTGGCAGCGACCCCTAGTCACAGTAAAAATAGGGGGACAGCTAATAGAAGCCCTATTAGACACAGGAGCAGATGACACAGTGTTAGAAGACATAAATCTGCCATGGAAATGGAAACCAAAAATGATAGGGGGAATTGGAGGTTTTATCAAAGTAAGACAATATGATCAGATAGTTATAGAAATTTGTGGAAAAAGGGCTATCGGTACAGTATTAGTAGGACCTACACCTGTCAACATAATTGGAAGAAATATGTTGGTTCAGCTTGGTTGTACTCTAAATTTTCCAATTAGTCCTATTGAAACTGTACCAGTAAAATTGAAGCCAGGAATGGATGGTCCAAAGGTCAAACAATGGCCATTGACAGAAGAAAAAATAAAAGCATTAACAGAAATTTGTAAAGAAATGGAAAAGGAAGGGAAAATTTCAAAAATTGGGCCTGAAAATCCATACAACACTCCAGTGTTTGCTATAAAGAAAAAAGACAGCGATAAATGGAGAAAATTAGTAGATTTCAGAGAACTCAATAAGAGAACTCAAGACTTCTGGGAAGTTCAGTTAGGAATACCACACCCAGCGGGATTAAAAAAGAAAAAATCAGTAACAGTATTAGATGTGGGGGACGCATATTTTTCCGTTCCCCTACATGAAGACTTCAGGAAATATACTGCATTCACCATACCTAGTATAAACAATGAGACACCAGGAATTAGGTATCAGTACAATGTACTTCCACAGGGATGGAAAGGATCACCAGCAATATTCCAGAGTAGCATGACAAAAATCCTAGATCCCTTTAGGGCAAGAAATCCAGAGATGGTCATCTACCAATACATGGATGACTTGTATGTAGGATCTGATTTAGAAATAGATCAGCATAGAGCAAAAATAGAGGAGTTAAGGGCTCATTTATTAAGATGGGGATTTACTACACCAGACAAAAAGCATCAGAAAGAACCTCCATTTCTGTGGATGGGATATGAGCTTCATCCTGACAAGTGGACAGTCCAGCCTATAAAGCTGCCAGAAAAAGACAGCTGGACTGTCAATGATATACAGAAATTAGTAGGAAAGTTAAATTGGGCAAGTCAGATTTATGCAGGGATTAAAGTAAGGCAACTGTGTAAACTCCTTAGAGGAACCAAAGCATTAACAGACATAGTACCACTGACTAGAGAAGCAGAATTAGAATTGGAAGAGAACAGGGAGATTCTAAAAGACCCTGTACATGGGGTATATTATGACCCATCAAAAGACTTAATAGCAGAAATACAGAAACAAGGGCAAGGCCAATGGTCATATCAAATTTATCAAGAACCATTTAAAAATCTAAAAACAGGGAAATATGCAAAAAGGAAGTCCACCCACACCAATGATGTAAAACAATTAACAGAAGCAGTACAAAAAATAGCCACAGAAAGCATAGTAATATGGGGAAAGATTCCTAAATTTAGACTACCCATACAAAAAGAAACATGGGAGACATGGTGGACGGAGTGGTGGCAGGCTACCTGGATTCCTGAGTGGGAGTTTGTCAATACCCCTCCTCTAGTAAAACTATGGTACCAGTTAGAAACAGAACCCATAGCAGGAGCAGAAACTTTCTATGTAGATGGGGCAGCTAATAGAGAGACTAAACTAGGAAAGGCAGGGTATGTCACTGATAGAGGAAGACAAAAAATTGTCCCCTTGACAGAGACAACAAATCAAAAGACTGAATTACATGCAATCTATTTGGCTTTACAGGATTCAGGGTCAGAAGTAAACATAGTAACAGATTCACAGTATGCATTAGGAATCATTCAAGCGCAACCAGATAGCAGTGAATCAGAGTTAGTCAATCAAATAATAGAAAAGTTAATAGAAAAGGAAAGGGTCTACCTGTCATGGGTACCAGCACACAAAGGGATTGGAGGAAATGAACAGGTGGATAAATTAGTCAGTTGTGGAATCAGAAAAGTGTTATTTTTAGATGGGATAGATAAGGCTCAAGAAGAACATGAAAAATATCACAGTAATTGGAGAGCAATGGCTCATGACTTTAATCTGCCACCTATAGTAGCCAAAGAAATAGTAGCCAGCTGTGATAAATGGTCAGGCTAAAAGGGGAAGCCATGCATGGACAAGTAGACTGCAGTCCAGGAATATGGCAACTAGATTGCACACATCTAGAAGGAAAAATTATCGTGGTAGCAGTCCATGTAGCCAGTGGCTATATAGAAGCAGAAGTCATCCCAGCAGAGACAGGACAGGAGACAGCATACTTTCTATTAAAATTAGCAGGAAGATGGCCAGTAAAAGTAATACATACAGACAATGGGCCCAATTTCACCAGTGCAGCAGTTAAGGCAGCCTGTTGGTGGGCAGATGTCAAACAGGAATTTGGGATTCCCTACAATCCCCAAAGTCAAGGAGTAGTGGAATCTATGAATAAAGAATTAAAGAAAATCATAGGGCAGGTAAGAGATCAAGCTGAACATCTTAAGACAGCAGTGCAAATGGCAGTGTTCATCCACAATTTTAAAAGAAAAGGGGGGATTGGGGGATACAGTGCAGGGGAAAGAATAATAGACATAATAGCAACAGATATACAAACTAAAGAATTACAAAAACAAATCATAAAAATTCAAAATTTTCGGGTTTATTACAGGGACAGCAGAGATCCAATTTGGAAAGGACCAGCAAAACTCCTTTGGAAAGGTGAAGGGGCAGTAGTAATACAAGACAATGGTGATATAAAAGTAGTACCAAGAAGAAAAGCAAAGATCATTAGGGATTATGGAAAACAGATGGCAGGTGATGATTGTGTGGCAGGTAGACAGGATGAGGATTAGAACATGGAACAGTCTAGTAAAACATCATATGTATGTGTCAAAGAAAGCTAGAGAGTGGTTCTATAGACATCACTATGAAAGCAGACATCCAAGAGTAAGTTCAGAAGTACACATCCCGCTAAAGGAGGCTAGATTAATAGTAAGAACATATTGGGGTCTGCACCCAGGAGAAAAAGACTGGCACTTGGGTCATGGGGTCTCCATAGAATGGAGGCAGGGAAGGTACAGTACACAAATAGACCCTGATCTGGCAGACCATCTAATCCATCTGTATTATTTTGACTGTTTTTCAGAATCTGCCATAAGGAGAGCCATATTAGGAGAAATAGTTAGGCCTAGATGTGAATATCAAGCAGGACATAATAAGGTAGGGTCTCTGCAATATTTGGCATTGAGAGCATTAGTAGCTTCAACAAGGACAAAGCCACCTTTGCCTAGTGTTAGGAAATTAGTAGAGGATAGATGGAACAAGCCCCAGAAGACCAGGGGCCACCGAGGGAGCCACACAATGAATGGGTGTTAGAACTGTTAGAGGAGCTAAAGCAAGAAGCAGTTAGACATTTCCCTAGGCCGTGGCTACATGGCCTGGGACAACATATCTATAATACCTATGGGGATACTAGGGAGGGAGTTGAAGCTATAGTAAGAATTTTGCAACAACTACTGTTTGTTCATTTCAGAATTGGGTGCCAACATAGCAGAATAGGCATTATTCCAAGAAGAAGAGTAAGGGATGGAGCCAGTAGACCCTAACTTAGAGCCCTGGAACCATCCGGGAAGCCAGCCTAAAACTGCTTGTAACAATTGCTATTGTAAAAAGTGTTGCTATCATTGCCAAAGGTGCTTTCTAAACAAAGGCTTAGGCATCTCCTATGGCAGGAAGAAGCGGAGACCCCGACGAGGACCTGATCAGGGCAATACGGATCATCAAAATCCTGTACCAAAGCAGTAAGTAGTAGTAATCAATATAGGTAATGTCACCTTTAGCAATACTGTCAATAGTAGGACTGGTAGTAGCATCAATTTTAGCAATAGTTGTGTGGACTGTAGTATTTATAGAATATAGAAAGATTAAGAAGCAAAGGAAAATAGACTGGTTACTTGAGAGAATAAGTGAAAGAGCAGAAGACAGTGGCAACGAGAGTGATGGGGACACAGAGGAATTGTCAAAAATGGTGGGAATGGGGAATCTTGGTTTTTGGGATGATAATGATGTGTAAGGCTGCAGATTTGTGGGTCACAGTATACTATGGAGTACCTGTGTGGAGAGATGCAGATACCACCCTATTTTGTGCATCAGACGCTAAAGCATATGCTACAGAAAAGCATAATGTCTGGGCCACACATGCCTGTGTACCCACAGACCCCAACCCACAAGAAGTAAACCTGGCAAATGTAACAGAAGATTTTAACATGTGGAAAAATAACATGGTAGAGCAGATGCATGCAGATATAATCAGTCTATGGGATCAAAGCCTAAAGCCATGTGTAAAATTAACCCCTCTCTGCGTCACTTTAAATTGTAGCAATGCCAACACCACTAACACCAATAGCACTGAAGAAATAAAAAACTGCTCTTACAATATGCCCACAGAACTAAAAGATAAAACACAGAAAGTCTATTCACTGTTTTATGAACTTGATGTAGTACTACTTAATAGAAGTAAGAATAGTAGTTATAGTACTTATAGACTAATAAGTTGTAATACCTCAGTCATCACACAAGCTTGTCCAAAGGTATCCTTTGAGCCAATTCCTATACATTATTGTGCCCCAGCTGGTTATGCGATTCTAAAGTGTAAGGATAAGGAATTCAATGGAAAAGGGTCATGCAGTAATGTTAGCTCAGTACAATGTGCACATGGAATTAGGCCAGTAGCATCAACTCAACTGCTGCTGAATGGCAGTCTAGCAGAAGGAAAGGTAATGATTAGATCTGAAAATATTACAGACAATGCCAAAAACATAATAGTACAGTTTAATAAACCTGTACCAATTAATTGTACCAGACCCAACAACAATACAAGAAAAAGTATACGCTTTGGACCAGGACAGGCCTTCTATACAAATAATAACATAATAGGGGATATAAGACAAGCACATTGTAATATCAGCATAACAGAATGGAATGCCACTCTAAAAAAGGTAGTTGAACAATTAAGAGAACACTTCCCTAATAAAACAATAATCTTTAATAGCTCCTCAGGAGGGGACCTAGAAATTACAACACATAGTTTTAATTGTGGAGGAGAATTTTTCTATTGCAATACAACAGGCCTGTTTAATAGCACATGGGAAAATGGCACTAACAAACAGAATTACACGGAGTCAAATGACACTATAACGCTCCAATGCAGAATAAAACAAATTATAAACATGTGGCAGAGAGTAGGCCGAGCAATGTATGCCCCTCCCATTGCAGGAGTAATAAAGTGTACATCAAACATTACAGGAATGATATTGACAAGAGACGGTGGGAAGAACAGTATTAATGAGACCTTCAGACCTGGAGGAGGAGATATGAGGGACAATTGGAGAAGTGAATTATATAAGTATAAAGTAGTAAAAATTGAACCACTAGGAATAGCACCCACAGAGGCAAGGAGAAGAGTGGTGCAGAGAGAAAAAAGAGCAGTTGGATTGGGAGCTGTTTTCCTTGGGTTCTTGGGAGCAGCAGGAAGCACTATGGGCGCGGCGTCAATAACGCTGACGGTACAGGCCAGACAATTATTGACTGGCATAGTGCAACAGCAAAGCAATTTGCTGAAGGCTATAGAGGCTCAACAACAGATGTTGAGGCTCACAGTCTGGGGCATTAAACAGCTCCAGGCAAGAGTCCTGGCTCTGGAAAGATACCTACAGGATCAACAGCTCCTAGGAATTTGGGGCTGCTCTGGAAAACTCATCTGCGCCACTGATGTGAGATGGAACTCTAGTTGGAGTAATAAGACTCAGGAGCAGATTTGGAAAAACATGACCTGGTTGCAATGGGATAAGGAAATTAGCACTTACACAGACATAATATATATGCTACTTGAGGAATCGCAGAACCAGCAGGAAAAGAATGAACAAGACTTATTGGCATTAGACAAATGGGCAAATTTGTGGAATTGGTTTGACATAACAAGATGGCTGTGGTATATAAAAATATTTATAATGATAGTAGGAGGCTTGATAGGATTAAGAATAGTTATTGCTATAATTTCTGTAGTAAAAAGAGTTAGGCAGGGATACTCACCATTGTCATTTCAGATCCCTACCCCAAACCCAGAGGGACTCGACAGGCCCGGAAGAATCGAAGAAGAAGGTGGAGAGCAAGGCAGAGACAGATCGATTCGATTAGTGAGCGGATTCTTAGCACTTGCCTGGGACGACCTACGGAGCCTGTGCCTCTTCAGCTACCACCGCTTGAGAGATTGCATCTTGATTGCAGCGAGGATTGTGGAACTTGTGGGACACAGCAGTCTCAAGGGGCTGAGACTGGGGTGGGAAGGCCTCAAACATCTGTGGAATCTTCTGGTATATTGGGGTCAGGAATTGAAGACTAGTGCTATTAGATTGCTTGATACCATAGCAGTAGCAGTAGCTGAGTGGACAGATAGGGTTATAGAAATAGGACAAAGAGCTTGCAGAGCTATCCGCAACATACCTAGAAGAATCAGACAGGGCCTCGAAAGGGCGTTACTATAAAATGGGGGGCAAGTGGTCAAAAAGAACCATAGTGGGATGGCCTGAGATTAGGGAAAGAATGAGACGAACTCCTCCAGCAGCAGAAGGAGTAAGACCAACTCCTCCAGCTGCAGAAGGAGTAGGAGCAGTGTCTCAAGATTTAGCCAGACATGGAGCAGTCACAAGCAGTAATACAGCAGCTAACAATCCTGATTGCGCCTGGCTGGAAGCGCAAGAAGAGGAGGAAGTAGGCTTTCCAGTCAGGCCACAGGTACCTTTAAGGGCGATGACCTACAAGGGAGCTGTAGATCTCAGCCACTTTTTAAAAGAAAAGGGGGGACTGGATGGGCTAATTTACTCCCAGAGAAGACAAGACATCCTTGATCTGTGGGTCTACAACACACAGGGCTACTTCCCTGATTGGCAGAATTACACACCAGGGCCAGGGGCCAGGTTCCCACTAACATTTGGATGGTGCTTCAAGCTAGTACCAGTTGATCCATCTGAGGTAGAAGAGGCTACGGAGGGGGAGAACAACAGTTTATTACACCCCATATGCCAACATGGAGCAGAGGACCCTGAAAGAGAAGTGTTAAAGTGGAAGTTTGATAGTCGCCTGGCGCTGAGACACCTAGCCAGAGAGCAGCATCCGGAGTTCTACAAAGACTGCTGACACAGAAGATGCTGACACAGAAGTTGCTGACAGGGACTTTCCACGGGGACTTTCCGGGGAGGTGTGGTGAGGGCGGAGTTGGGAGTGGCTAACCCTCAGATGCTGCATATAAGCAGCTGCTTTGCGCCTGTACTGGGTCTCTCCTTGTTGGACCAGATAGAGCCTGGGAGCTCTCAGGCTAGCAGGGGAACCCA
>A2.CD.97.97CDKTB48_AF286238_H.CF.90.056_AF005496
TTTTTCGAAGCGAAGTACCAGGGAAGTTCTCTCGACGCAAGACTCGGCTTGCTGAGGTGCACACGGCAAGAGGCGAGAAGCGACGGCTGGTGAGTACGCCTAAAATTTTTGACTAGCGGAGGCTAGAAGGAGAGAGATGGGTGCGAGAGCGTCAGTATTGAGCGGCGGAAAATTAGAAGCTTGGGAGAAAATTCGGTTAAGGCCAGGGGGAAAGAAAAAATATAGACTGAAACATTTAGTATGGGCAAGCAGGGAGCTGGAAAAATTCTCAATCAACCCCAGCCTTTTAGAAACAGAAACAGGATGTAGACGAATATTTGGGCAATTACAACCAGCTCTCGAGACAGGAACAGAAGAACTTAGATCATTATATAATACAATAGCAGTCCTCTACTTTGTTCATCAAAAGATAGAGGTAAAAGACACCAAGGAAGCTCTAGATAAAATAGAGGAAGAACAAAACAAATGCAAGCAGAAGACACAGCAGGCAGCAGCTGACACAGGAAGCAGCAGCAGTCAAAATTACAGAGGTAGCAGCAGTCAAAATTACCCTATAGTGCAAAATGCACAAGGGCAAATGGTACACCAGGCCGTGTCACCTAGGACTTTGAATGCATGGGTCAAAGTAGTTGAAGAGAAGGCTTTTAGCCCAGAAGTAATACCCATGTTTACAGCATTATCAGAAGGAGCCACCCCACAAGACTTAAATACTATGCTAAACACAGTGGGGGGACATCAAGCAGCTATGCAAATGTTAAAAGATACCATCAATGAGGAAGCTGCAGAATGGGACAGGTTACATCCAGTACAGGCAGGGCCTATTCCACCAGGCCAGATGAGAGAACCAAGGGGAAGTGACATAGCGGGAGCTACTAGTAACCTTCAGGAACAAATAGGATGGATGACCAGCAACCCACCTATTCCAGTGGGAGAAATCTATAAAAGATGGATAATCCTGGGATTAAATAAAATAGTAAGAATGTATAGCCCTGTCAGCATTTTGGACATAAAACAAGGGCCAAAAGAACCCTTTAGAGACTATGTAGATAGGTTCTTTAAAACTCTCAGAGCTGAGCAAGCTACACAGGAGGTAAAAAATTGGATGACAGACACCTTGCTGGTCCAAAATGCAAACCCAGATTGTAAATCCATCTTGAGGGCATTAGGACCAGGGGCTACATTAGAAGAAATGATGACAGCATGTCAGGGAGTGGGAGGACCCGGCCATAAAGCAAGGGTTTTAGCTGAAGCAATGAGCCAAGTACAAAATACAAACATAATGATACAGAGAGGCAATTTTAAGGGTCAAAAAAGAATTAAGTGTTTCAACTGTGGCAAGGAAGGACACCTAGCTAGAAATTGCAGGGCCCCTAGGAAAAAGGGCTGCTGGAAATGTGGGAAGGAAGGACATCAAATGAAAGACTGCACTGAGAGACAGGCTAATTTTTTAGGGAAAATTTGGCCTTCCAACAAAGGGAGGCCAGGGAATTTTCCTCAGAGCAGGACAGAGCCAACAGCCCCACCAATGGAGGAAGAGATAACCTCCTCGCTGAAGCAGGAGAACAGGGAGCCGTCCACCCCTGCAATTTCCCTCAAATCACTCTTTGGCAACGACCTCTTGTCACAGTGAAAATAGAAGGACAGCTAAGAGAAGCTTTATTAGATACAGGAGCAGATGATACAGTGTTAGAAGACATAAATCTGCCATGGAAATGGAAACCAAAAATGATAGGGGGAATTGGAGGTTTTATCAAAGTAAGACAATATGATCAGATAGTTATAGAAATTTGTGGAAAAAGGGCTATCGGTACAGTATTAGTAGGACCTACACCTGTCAACATAATTGGAAGAAATATGTTGGTTCAGCTTGGTTGTACTCTAAATTTTCCAATTAGTCCTATTGAAACTGTACCAGTAAAATTGAAGCCAGGAATGGATGGTCCAAAGGTCAAACAATGGCCATTGACAGAAGAAAAAATAAAAGCATTAACAGAAATTTGTAAAGAAATGGAAAAGGAAGGGAAAATTTCAAAAATTGGGCCTGAAAATCCATACAACACTCCAGTGTTTGCTATAAAGAAAAAAGACAGCGATAAATGGAGAAAATTAGTAGATTTCAGAGAACTCAATAAGAGAACTCAAGACTTCTGGGAAGTTCAGTTAGGAATACCACACCCAGCGGGATTAAAAAAGAAAAAATCAGTAACAGTATTAGATGTGGGGGACGCATATTTTTCCGTTCCCCTACATGAAGACTTCAGGAAATATACTGCATTCACCATACCTAGTATAAACAATGAGACACCAGGAATTAGGTATCAGTACAATGTACTTCCACAGGGATGGAAAGGATCACCAGCAATATTCCAGAGTAGCATGACAAAAATCCTAGATCCCTTTAGGGCAAGAAATCCAGAGATGGTCATCTACCAATACATGGATGACTTGTATGTAGGATCTGATTTAGAAATAGATCAGCATAGAGCAAAAATAGAGGAGTTAAGGGCTCATTTATTAAGATGGGGATTTACTACACCAGACAAAAAGCATCAGAAAGAACCTCCATTTCTGTGGATGGGATATGAGCTTCATCCTGACAAGTGGACAGTCCAGCCTATAAAGCTGCCAGAAAAAGACAGCTGGACTGTCAATGATATACAGAAATTAGTAGGAAAGTTAAATTGGGCAAGTCAGATTTATGCAGGGATTAAAGTAAGGCAACTGTGTAAACTCCTTAGAGGAACCAAAGCATTAACAGACATAGTACCACTGACTAGAGAAGCAGAATTAGAATTGGAAGAGAACAGGGAGATTCTAAAAGACCCTGTACATGGGGTATATTATGACCCATCAAAAGACTTAATAGCAGAAATACAGAAACAAGGGCAAGGCCAATGGTCATATCAAATTTATCAAGAACCATTTAAAAATCTAAAAACAGGGAAATATGCAAAAAGGAAGTCCACCCACACCAATGATGTAAAACAATTAACAGAAGCAGTACAAAAAATAGCCACAGAAAGCATAGTAATATGGGGAAAGATTCCTAAATTTAGACTACCCATACAAAAAGAAACATGGGAGACATGGTGGACGGAGTGGTGGCAGGCTACCTGGATTCCTGAGTGGGAGTTTGTCAATACCCCTCCTCTAGTAAAACTATGGTACCAGTTAGAAACAGAACCCATAGCAGGAGCAGAAACTTTCTATGTAGATGGGGCAGCTAATAGAGAGACTAAACTAGGAAAGGCAGGGTATGTCACTGATAGAGGAAGACAAAAAATTGTCCCCTTGACAGAGACAACAAATCAAAAGACTGAATTACATGCAATCTATTTGGCTTTACAGGATTCAGGGTCAGAAGTAAACATAGTAACAGATTCACAGTATGCATTAGGAATCATTCAAGCGCAACCAGATAGCAGTGAATCAGAGTTAGTCAATCAAATAATAGAAAAGTTAATAGAAAAGGAAAGGGTCTACCTGTCATGGGTACCAGCACACAAAGGGATTGGAGGAAATGAACAGGTGGATAAATTAGTCAGTTGTGGAATCAGAAAAGTGTTATTTTTAGATGGGATAGATAAGGCTCAAGAAGAACATGAAAAATATCACAGTAATTGGAGAGCAATGGCTCATGACTTTAATCTGCCACCTATAGTAGCCAAAGAAATAGTAGCCAGCTGTGATAAATGGTCAGGCTAAAAGGGGAAGCCATGCATGGACAAGTAGACTGCAGTCCAGGAATATGGCAACTAGATTGCACACATCTAGAAGGAAAAATTATCGTGGTAGCAGTCCATGTAGCCAGTGGCTATATAGAAGCAGAAGTCATCCCAGCAGAGACAGGACAGGAGACAGCATACTTTCTATTAAAATTAGCAGGAAGATGGCCAGTAAAAGTAATACATACAGACAATGGGCCCAATTTCACCAGTGCAGCAGTTAAGGCAGCCTGTTGGTGGGCAGATGTCAAACAGGAATTTGGGATTCCCTACAATCCCCAAAGTCAAGGAGTAGTGGAATCTATGAATAAAGAATTAAAGAAAATCATAGGGCAGGTAAGAGATCAAGCTGAACATCTTAAGACAGCAGTGCAAATGGCAGTGTTCATCCACAATTTTAAAAGAAAAGGGGGGATTGGGGGATACAGTGCAGGGGAAAGAATAATAGACATAATAGCAACAGATATACAAACTAAAGAATTACAAAAACAAATCATAAAAATTCAAAATTTTCGGGTTTATTACAGGGACAGCAGAGATCCAATTTGGAAAGGACCAGCAAAACTCCTTTGGAAAGGTGAAGGGGCAGTAGTAATACAAGACAATGGTGATATAAAAGTAGTACCAAGAAGAAAAGCAAAGATCATTAGGGATTATGGAAAACAGATGGCAGGTGATGATTGTGTGGCAGGTAGACAGGATGAGGATTAGAACATGGAACAGTCTAGTAAAACATCATATGTATGTGTCAAAGAAAGCTAGAGAGTGGTTCTATAGACATCACTATGAAAGCAGACATCCAAGAGTAAGTTCAGAAGTACACATCCCGCTAAAGGAGGCTAGATTAATAGTAAGAACATATTGGGGTCTGCACCCAGGAGAAAAAGACTGGCACTTGGGTCATGGGGTCTCCATAGAATGGAGGCAGGGAAGGTACAGTACACAAATAGACCCTGATCTGGCAGACCATCTAATCCATCTGTATTATTTTGACTGTTTTTCAGAATCTGCCATAAGGAGAGCCATATTAGGAGAAATAGTTAGGCCTAGATGTGAATATCAAGCAGGACATAATAAGGTAGGGTCTCTGCAATATTTGGCATTGAGAGCATTAGTAGCTTCAACAAGGACAAAGCCACCTTTGCCTAGTGTTAGGAAATTAGTAGAGGATAGATGGAACAAGCCCCAGAAGACCAGGGGCCACCGAGGGAGCCACACAATGAATGGGTGTTAGAACTGTTAGAGGAGCTAAAGCAAGAAGCAGTTAGACATTTCCCTAGGCCGTGGCTACATGGCCTGGGACAACATATCTATAATACCTATGGGGATACTAGGGAGGGAGTTGAAGCTATAGTAAGAATTTTGCAACAACTACTGTTTGTTCATTTCAGAATTGGGTGCCAACATAGCAGAATAGGCATTATTCCAAGAAGAAGAGTAAGGGATGGAGCCAGTAGACCCTAACTTAGAGCCCTGGAACCATCCGGGAAGCCAGCCTAAAACTGCTTGTAACAATTGCTATTGTAAAAAGTGTTGCTATCATTGCCAAAGGTGCTTTCTAAACAAAGGCTTAGGAATTTCCTATGGCAGGAAGAAGCGGAGCCAGCGACACAGAACTCCTGCAAGTTTGCAAGATCATCAAAATTCTATATCAAAGCAGTAAGTATTATCATAAATGTATATATTAGGATTAGGAATAGGAGCGCTAGTAGTAACATCAATTTTAGCAATAGTTGTGTGGACTGTAGTATTTATAGAATATAGAAAGATTAAGAAGCAAAGGAAAATAGACTGGTTACTTGAGAGAATAAGTGAAAGAGCAGAAGACAGTGGCAACGAGAGTGATGGGGACACAGAGGAATTGTCAAAAATGGTGGGAATGGGGAATCTTGGTTTTTGGGATGATAATGATGTGTAAGGCTGCAGATTTGTGGGTCACAGTATACTATGGAGTACCTGTGTGGAGAGATGCAGATACCACCCTATTTTGTGCATCAGACGCTAAAGCATATGCTACAGAAAAGCATAATGTCTGGGCCACACATGCCTGTGTACCCACAGACCCCAACCCACAAGAAGTAAACCTGGCAAATGTAACAGAAGATTTTAACATGTGGAAAAATAACATGGTAGAGCAGATGCATGCAGATATAATCAGTCTATGGGATCAAAGCCTAAAGCCATGTGTAAAATTAACCCCTCTCTGCGTCACTTTAAATTGTAGCAATGCCAACACCACTAACACCAATAGCACTGAAGAAATAAAAAACTGCTCTTACAATATGCCCACAGAACTAAAAGATAAAACACAGAAAGTCTATTCACTGTTTTATGAACTTGATGTAGTACTACTTAATAGAAGTAAGAATAGTAGTTATAGTACTTATAGACTAATAAGTTGTAATACCTCAGTCATCACACAAGCTTGTCCAAAGGTATCCTTTGAGCCAATTCCTATACATTATTGTGCCCCAGCTGGTTATGCGATTCTAAAGTGTAAGGATAAGGAATTCAATGGAAAAGGGTCATGCAGTAATGTTAGCTCAGTACAATGTGCACATGGAATTAGGCCAGTAGCATCAACTCAACTGCTGCTGAATGGCAGTCTAGCAGAAGGAAAGGTAATGATTAGATCTGAAAATATTACAGACAATGCCAAAAACATAATAGTACAGTTTAATAAACCTGTACCAATTAATTGTACCAGACCCAACAACAATACAAGAAAAAGTATACGCTTTGGACCAGGACAGGCCTTCTATACAAATAATAACATAATAGGGGATATAAGACAAGCACATTGTAATATCAGCATAACAGAATGGAATGCCACTCTAAAAAAGGTAGTTGAACAATTAAGAGAACACTTCCCTAATAAAACAATAATCTTTAATAGCTCCTCAGGAGGGGACCTAGAAATTACAACACATAGTTTTAATTGTGGAGGAGAATTTTTCTATTGCAATACAACAGGCCTGTTTAATAGCACATGGGAAAATGGCACTAACAAACAGAATTACACGGAGTCAAATGACACTATAACGCTCCAATGCAGAATAAAACAAATTATAAACATGTGGCAGAGAGTAGGCCGAGCAATGTATGCCCCTCCCATTGCAGGAGTAATAAAGTGTACATCAAACATTACAGGAATGATATTGACAAGAGACGGTGGGAAGAACAGTATTAATGAGACCTTCAGACCTGGAGGAGGAGATATGAGGGACAATTGGAGAAGTGAATTATATAAGTATAAAGTAGTAAAAATTGAACCACTAGGAATAGCACCCACAGAGGCAAGGAGAAGAGTGGTGCAGAGAGAAAAAAGAGCAGTTGGATTGGGAGCTGTTTTCCTTGGGTTCTTGGGAGCAGCAGGAAGCACTATGGGCGCGGCGTCAATAACGCTGACGGTACAGGCCAGACAATTATTGACTGGCATAGTGCAACAGCAAAGCAATTTGCTGAAGGCTATAGAGGCTCAACAACAGATGTTGAGGCTCACAGTCTGGGGCATTAAACAGCTCCAGGCAAGAGTCCTGGCTCTGGAAAGATACCTACAGGATCAACAGCTCCTAGGAATTTGGGGCTGCTCTGGAAAACTCATCTGCGCCACTGATGTGAGATGGAACTCTAGTTGGAGTAATAAGACTCAGGAGCAGATTTGGAAAAACATGACCTGGTTGCAATGGGATAAGGAAATTAGCACTTACACAGACATAATATATATGCTACTTGAGGAATCGCAGAACCAGCAGGAAAAGAATGAACAAGACTTATTGGCATTAGACAAATGGGCAAATTTGTGGAATTGGTTTGACATAACAAGATGGCTGTGGTATATAAAAATATTTATAATGATAGTAGGAGGCTTGATAGGATTAAGAATAGTTATTGCTATAATTTCTGTAGTAAAAAGAGTTAGGCAGGGATACTCACCATTGTCATTTCAGATCCCTACCCCAAACCCAGAGGGACTCGACAGGCCCGGAAGAATCGAAGAAGAAGGTGGAGAGCAAGGCAGAGACAGATCGATTCGATTAGTGAGCGGATTCTTAGCACTTGCCTGGGACGACCTACGGAGCCTGTGCCTCTTCAGCTACCACCGCTTGAGAGATTGCATCTTGATTGCAGCGAGGATTGTGGAACTTGTGGGACACAGCAGTCTCAAGGGGCTGAGACTGGGGTGGGAAGGCCTCAAACATCTGTGGAATCTTCTGGTATATTGGGGTCAGGAATTGAAGACTAGTGCTATTAGATTGCTTGATACCATAGCAGTAGCAGTAGCTGAGTGGACAGATAGGGTTATAGAAATAGGACAAAGAGCTTGCAGAGCTATCCGCAACATACCTAGAAGAATCAGACAGGGCCTCGAAAGGGCGTTACTATAAAATGGGGGGCAAGTGGTCAAAAAGAACCATAGTGGGATGGCCTGAGATTAGGGAAAGAATGAGACGAACTCCTCCAGCAGCAGAAGGAGTAAGACCAACTCCTCCAGCTGCAGAAGGAGTAGGAGCAGTGTCTCAAGATTTAGCCAGACATGGAGCAGTCACAAGCAGTAATACAGCAGCTAACAATCCTGATTGCGCCTGGCTGGAAGCGCAAGAAGAGGAGGAAGTAGGCTTTCCAGTCAGGCCACAGGTACCTTTAAGGGCGATGACCTACAAGGGAGCTGTAGATCTCAGCCACTTTTTAAAAGAAAAGGGGGGACTGGATGGGCTAATTTACTCCCAGAGAAGACAAGACATCCTTGATCTGTGGGTCTACAACACACAGGGCTACTTCCCTGATTGGCAGAATTACACACCAGGGCCAGGGGCCAGGTTCCCACTAACATTTGGATGGTGCTTCAAGCTAGTACCAGTTGATCCATCTGAGGTAGAAGAGGCTACGGAGGGGGAGAACAACAGTTTATTACACCCCATATGCCAACATGGAGCAGAGGACCCTGAAAGAGAAGTGTTAAAGTGGAAGTTTGATAGTCGCCTGGCGCTGAGACACCTAGCCAGAGAGCAGCATCCGGAGTTCTACAAAGACTGCTGACACAGAAGATGCTGACACAGAAGTTGCTGACAGGGACTTTCCACGGGGACTTTCCGGGGAGGTGTGGTGAGGGCGGAGTTGGGAGTGGCTAACCCTCAGATGCTGCATATAAGCAGCTGCTTTGCGCCTGTACTGGGTCTCTCCTTGTTGGACCAGATAGAGCCTGGGAGCTCTCAGGCTAGCAGGGGAACCCA
>A2.CD.97.97CDKFE4_AF286240_J.SE.94.SE7022_AF082395
CCAGCCAAAATTACCCTATAGTGCAGAATGCACAAGGGCAAATGGTACACCAGGCCCTATCACCTAGGACTTTAAATGCATGGGTCAAAGTAGTAGAAGAAAAGGCTTTCAGCCCAGAAGTAATACCCATGTTTTCAGCATTATCAGAAGGAGCCACCCCACAAGATTTAAATACTATGCTAAACACGGTGGGGGGACATCAAGCAGCTATGCAAATATTAAAAGATACCATCAATGAGGAAGCTGCAGAATGGGACAGGCTACATCCAGTACATGCAGGGCCTATTCCACCAGGCCAGATGAGAGAACCAAGGGGAAGTGACATAGCAGGAACTACTAGTACCCTTCAGGAACAAATAGGATGGATGACTAGCAACCCACCTATCCCAGTGGGAGAAATCTATAAAAGATGGATAATCCTGGGATTAAATAAGATAGTAAGAATGTATAGCCCTGTCAGTATTTTGGACATAAGACAAGGGCCAAAAGAACCCTTTAGAGACTATGTAGATAGGTTCTTTAAAACTCTCAGAGCTGAGCAAGCTACACAAGAGGTAAAAAACTGGATGACAGACACCTTGCTGGTCCAAAATGCGAACCCAGATTGTAAATCAATCCTGAAAGCATTAGGACCAGGGGCTACATTAGAAGAAATGATGACAGCATGTCAGGGAGTGGGGGGACCCGGCCATAAAGCAAGGGTTTTGGCTGAAGCAATGAGCCAATTACAAAATGCAACTCCAAACATAATGATGCAGAAAGGCAATTTTAGGGGTCAAAAAAGAATCAAATGTTTCAACTGTGGCAAGGAAGGACACCTAGCCAGAAATTGCAGGGCCCCTAGGAAAAAGGGCTGCTGGAAATGTGGGAAGGAAGGACATCAGATGAAAGACTGCACTGAGAGACAGGCTAATTTTTTAGGGAAAATTTGGCCTCCCAACAGAGGGAGGCCAGGAAATTTTCCCCAGAGCAGACCAGAGCCAACAGCCCCACCAGCAGAGGACTTTGGAATGGGGGAAGAGACAAAAAACAGGGAACCGCATACTCCTGCAATTTCCCTCAAATCACTCTTTGGCAGCGACCTCTTGTCACAGTAAAAATAGAAGGACAGCTAAGAGAAGCTCTATTAGATACAGGAGCAGATGATACAGTGTTAGAAGACATAAATTTGCCAGGAAAATGGAAACCAAAAATGATAGGGGGAATTGGAGGTTTTATCAAAGTAAGACAATATGATCAGATAGCTATAGAAATTTGTGGAAAAAGGGCCATAGGTACAGTATTAGTAGGACCTACACCTGTCAACATAATTGGAAGAAATATGTTGGTTCAGCTTGGTTGTACTTTAAATTTTCCAATAAGTCCTATTGAAACTGTACCAGTAAAATTAAAGCCAGGAATGGATGGCCCAAAGGTTAAACAATGGCCATTGACAGAAGAAAAAATAAAAGCATTAACAGAAATTTGTGGAGAAATGGAAAAGGAAGGAAAAATTTCAAAAATTGGGCCTGAAAACCCATACAACACTCCAGTGTTTGCTATAAAGAAAAAAGACAGCACTAAATGGAGAAAATTAGTAGATTTCAGAGAACTCAATAAGAGAACTCAAGACTTTTGGGAAGTTCAGTTAGGAATACCACATCCAGCAGGATTAAAAAAGAAAAAATCAGTAACAGTACTAGATGTGGGGGACGCATATTTTTCCGTTCCCTTAGATGAAGACTTCAGAAAGTATACTGCATTCACCATACCTAGTATAAACAATGAGTCACCAGGAATTAGGTATCAGTACAATGTACTTCCACAGGGATGGAAAGGATCACCATCAATATTCCAGAGTAGCATGACAAAAATTTTAGAGCCCTTTAGATCAAAATATCCAGAGATGGTTATATACCAGTACATGGATGACTTGTATGTAGGATCTGATTTGGAAATAGGTCAGCATAGAGCAAAAATAGAGGAATTAAGGGCTCATTTATTAAGATGGGGATTTACTACACCAGACAAAAAACATCAGAAAGAGCCCCCATTTCTTTGGATGGGATATGAGCTTCATCCTGACAAATGGACAGTCCAGCCTATAAAGCTGCCAGAAAAAGACAGCTGGACTGTCAATGATATACAGAAATTAGTAGGAAAGTTAAATTGGGCAAGTCAGATTTATGCAGGGATTAAAGTAAAGCAACTGTGTAGACTCCTTAGAGGAACCAAAGCACTAACAGACATAGTAACACTGACTAAAGAAGCAGAATTAGAATTGGAAGAGAACAGGGAGATTCTAAAAAACCCTGTACATGGGGTATACTATGACCCATCAAAAGACTTAATAGCAGAAATACAGAAACAAGGGCAAGATCAATGGACATATCAAATTTATCAAGAGCCATTTAAAAATCTAAAAACAGGGAAATATGCAAAAAAGAAATCCACACACACTAATGATGTAAAACAATTAACAGAAGCAGTACAAAAAATAGCCATAGAAAGCATAGTAATATGGGGAAAGACTCCTAAATTTAGATTACCCATACAAAAAGAAACATGGGAGACATGGTGGACGGAGTATTGGCAGGCTACCTGGATTCCTGAGTGGGAGTTTGTCAATACCCCTCCTCTAGTAAAACTATGGTACCAATTAGAAACAGAACCCCTAGCAGGAGCAGAAACTTTCTATGTAGATGGGGCAGCTAATAGAGAGACTAAACTAGGAAAGGCAGGGTATGTCACTGACAGAGGAAGACAAAAAATTGTCTCCCTGACGGAAACAACAAATCAAAAGACTGAATTACATGCAATCTATTTGGCTTTACAGGATTCAGGATTAGAAGTGAACATAGTGACAGATTCACAGTATGCATTAGGAATCATTCAGGCACAACCAGATAGGAGTGAATCAGAGTTAGTCAATCAAATAATAGAAAAGTTAATAGAAAAGGAAAGGGTCTACCTGGCATGGGTACCAGCACACAAAGGGATTGGAGGAAATGAACAGGTAGATAAATTAGTCAGTTCTGGAATCAGGAAAGTGCTATTTTTAGATGGGATAGATAAGGCTCAAGAAGAACATGAAAGATATCACAGTAATTGGAGAGCAATGGCTCAGGACTTTAATCTGCCACCTATAGTAGCAAAAGAAATAGTAGCTAGCTGTGATAAGTGTCAGCTAAAAGGGGAAGCCATGCATGGACAAGTAGATTGTAGTCCAGGAATATGGCAACTAGATTGTACACATCTAGAAGGAAAAGTTATCCTGGTAGCAGTCCATGTAGCCAGTGGCTACATAGAAGCAGAAGTTATTCCAGCAGAGACAGGACAGGAAACAGCATATTTTATATTAAAATTAGCAGGCGGATGGCCAGTAAAAGCAATACATACAGATAATGGCAGCAACTTCACCAGTGGTGCTGTGAAGGCAGCCTGTTGGTGGGCAGATATCAAACAGGAATTTGGAATTCCCTACAATCCCCAAAGTCAAGGAGTAGTAGAATCTATGAATAAAGAATTAAAGAGAATCATAGGGCAGATAAGAGATCAAGCTGAACACCTTAAGACAGCAGTACAAATGGCAGTATTCATTCACAATTTTAAAAGAAAAGGGGGGATTGGGGGATACAGTGCAGGGGAAAGAATAATAGACATAATAGCAACAGATATACAAACTAAAGAATTACAAAAACAAATTATAAAAATTCAAAATTTTCGGGTTTATTACAGGGACAGCAGGGATCCAATTTGGAAAGGACCAGCAAAACTCCTCTGGAAAGGTGAAGGGGCAGTAGTAATACAAGACAACAGTGATATCAAGGTAGTACCAAGAAGAAAAGCAAAGATCATCAGGGATTATGGAAAACAGATGGCAGGTGATGATTGTGTGGCATGTAGACAGGATGAGGATTAGAACATGGAACAGTTTAGTAAAACATCATATATATGTTTCAAGGAAAGCTAAAGATTGGTCCTATAGACATCACTATGAAAGCAGACATCCAAAAGTAAGTTCAGAAGTACACATCCCGCTAGGGGAGGCTAGATTAGTAGTAAGAACATATTGGGGTCTGCAACCAGGAGAACAAGCCTGGCACTTGGGGCATGGGGTCTCCATAGAATGGAGGCAGAAAAGGTATAGTACACAAATAGACCCTGATCTGGCAGATCATCTAATCCATCTGTATTATTTTGACTGTTTTTCAGAATCTGCCATAAGGAAAGCCATATTAGGAGAAATAGTTAGCCCTAGGTGTGAATATCAAGCAGGACATAACAAGGTAGGATCGCTGCAGTACTTGGCATTGAAAGCATTAGTAGCTCCAACAAGGGCAAAGCCACCTTTACCTAGTGTTAAGAAATTAGTAGAGGATAGATGGAACAAGCCCCAGAAGACCAGGGGCCACAGAGGGAGCCATACAATGAATGGGTGTTAGAACTGTTAGAAGAGCTCAAGCAGGAGGCTGTTAGACATTTCCCTGGGCAGTGGCTACACGGCCTAGGACAACATATCTATAATACCTATGGGGATACTTGGGAAGGAGTTGAAGCTATAACAAGAACTCTGCAACAACTACTGTTTGTCCATTTCAGAATGGGGTGCCATCATAGCAGGATAGGTGTTACGCGACAGAGGAGAGCAAGGAATGGATCCAGTAGACCCTAAATTAGAGCCCTGGAACCATCCGGGAAGTCAGCCTAAAACTGCTTGTACCAAGTGTTATTGTAAAAAGTGTTGCTATCATTGCCCAGTGTGCTTTCTAAACAAGGGCTTAGGCATCTCCTATGGCAGGAAGAAGCGGAGACACCGACGAGGACCTGCTCAAAGCAGTAAGAATCATCAAAATCCTGTACCAAAGCAGTAAGTAGTAGTAATTAATAGATGTAATGATACCTTTAGCAATTTTGTCAATAGTAGGGCTGATAGTAGCATTAATCTTAGCAATAGTTATATGGACTATAGTATTTATAGAATATAGGAAAATTCAGAAGGAAAGGAAAATAGACAGGCTAATCAAGAGAATAAGTGAAAGAGCAGAAGACAGTGGCAATGAGAGTGATGGGGATACAGAGGAATTGTCCACCCTTATGGGGGTGGGAATCTTGCTTTTT
>A2.CY.94.94CY017_41_AF286237_K.CM.96.MP535_AJ249239
TTGAAAAGCGAAAGTAACAGGGACTCGAAAGCGAAAGTTCCAGAGGAGTTCTCTCGACGCAGGACTCGGCTTGCTGAGGTGCACACGGCAAGAGGCGAGGGGCGGCGACTGGTGAGTACGCCTAATATTTTTGACTAGCAGAGGCTAGAAGGAGAGAGATGGGTGCGAGAGCGTCAATATTAAGCGGGGGAAAATTAGATGCTTGGGAGAAAATTCGGTTAAGGCCAGGGGGAAAGAAAAAATATAGACTGAAACATTTGGTATGGGCAAGCAGGGAGCTGGAGAAATTCTCAATTAACCCTGGCCTTTTAGAAACACCAGAGGGATGTAGACAAATAATAAGGCAGTTACAACCAGCTCTCCAAACAGGAACAGAAGAACTTAAATCATTATATAATACAGTAGTAGTCCTCTACTGGGTACATCAAAGGGTAGATGTAAAAGACACCAAGGAAGCTCTAGATAAAATAGAGGAAGAACAAAACAAGCAGAAAACACAGCATGCAGCAGCTGACACAGGGAACAGCAGCAGTCAAAATTATCCCATAGTGCAAAATGCACAAGGGCAAATGGTACACCAGGCTATATCACCTAGGACGTTGAATGCCTGGGTCAAAGTAGTAGAAGAAAAGGCTTTCAGCCCAGAAGTAATACCTATGTTTACAGCATTATCAGAAGGAGCCACCCCACAAGACTTAAATACTATGCTAAACACAGTGGGGGGACATCAAGCAGCTATGCAAATGTTAAAAGATACCATCAATGAGGAAGCTGCAGAATGGGACAGGGTACATCCAGTACATGCAGGGCCTATTCCACCAGGCCAGATGAGAGAACCAAGGGGAAGTGACATAGCAGGAACTACTAGTACCCTTCAGGAACAAATAGGTTGGATGACCAGCGATCCACCCATCCCAGTGGGAGAAATTTATAAAAGATGGATAATCCTGGGATTAAATAAAATAGTAAGAATGTATAGCCCTGTCAGCATTTTGGACATAAGACAAGGGCCAAAAGAACCCTTTAGAGATTATGTGGATAGGTTCTTTAAAACTCTAAGAGCTGAGCAAGCCACACAGGAGGTAAAAAACTGGATGACGGACACCTTGCTGGTCCAAAATGCGAACCCAGATTGTAGATCCATCTTGAGAGCATTAGGACCAGGGGCCTCATTAGAAGAAATGATGACAGCATGTCAGGGAGTGGGAGGACCCAGCCATAAAGCAAGGGTTTTGGCTGAAGCAATGAGCCATGTACAAAGTACAAATACAAACATAATGATGCAGAGAGGCAATTTTAGGGGTCAAAAAAGAATTAAGTGTTTCAACTGTGGCAAGGAAGGACACCTAGCCAGAAATTGCAGGGCCCCTAGGAAAAAGGGCTGCTGGAAATGTGGAAAGGAAGGACATCAAATGAAAGATTGCACTGAGAGACAGGCTAATTTTTTAGGGAAAATTTGGCCTTCCAACAAAGGGAGGCCAGGAAATTTTCCTCAGAGCAGAACAGAGCCAACAGCCCCACCAGCAGAGAACTTGAGAATGGGGGAAGAGATAACCTCCTCCCTGAAGCAGGAACTGGAGACCAGGGAACCATACAATCCTGCAATTTCCCTCAAATCACTCTTTGGCAACGACCCCTTGTTACAGTAAAGATAGAGGGACAGCTAAAAGAAGCTCTATTAGATACAGGAGCAGATGATACAGTGTTAGAAGAAATAAATTTGCCAGGAAAATGGAAACCAAAAATGATAGGGGGAATTGGAGGTTTTATCAAAGTAAGACAATATGATCAGATAGCTATAGAAATTTGTGGAAAAAGGGCCATAGGTACAGTATTAGTAGGACCTACCCCTGTCAACATAATCGGAAGAAATATGTTGGTTCAGCTTGGTTGTACTTTAAATTTTCCAATTAGTCCTATTGAAACTGTACCAGTAAAATTAAAGCCAGGAATGGATGGTCCAAAGGTTAAACAATGGCCATTGACAGAAGAAAAAATAAAAGCATTAACAGAAATCTGTAAAGAAATGGAAAAGGAAGGAAAAATTTCAAAAATTGGGCCTGAAAATCCATACAACACTCCAGTGTTTGCTATAAAGAAAAAAGACAGCACTAAATGGAGAAAATTAGTAGATTTTAGAGAACTCAATAAGAGAACTCAAGACTTCTGGGAAGTTCAGTTAGGAATACCACATCCAGCAGGATTAAAAAAGAAAAAAGCAGTAACAGTACTTGATGTGGGGGACGCATATTTTTCCGTTCCCTTACATGAAGACTTCAGAAAATATACTGCATTCACCATACCTAGTACCAACAATGAGACACCAGGAGTTAGGTATCAGTACAATGTACTTCCACAGGGATGGAAAGGATCACCAGCAATATTCCAGAGTAGCATGACAAAGATCTTAGAGCCCTTTAGATCAAAGAATACAGAATTAATCATCTACCAATACATGGATGACTTGTATGTAGGATCTGATTTAGAAATAAGCCAGCATAGAGTAAAAATAGAGGAATTAAGGGCTCACTTATTGAAATGGGGATTTTATACACCAGACAAAAAACATCAGAAAGAACCTCCATTTCTTTGGATGGGATATGAGCTTCATCCTGACAAATGGACAGTCCAGCCTATAAAGCTGCCAGAAAAAGACAGCTGGACTGTCAATGATATACAGAAATTAGTAGGGAAATTAAATTGGGCAAGTCAGATTTATGCAGGGATTAAAGTAAAGCAACTGTGTAAACTCCTTAGAGGAGCCAAAGCACTAACAGACATAGTAACACTGACTAAAGAAGCAGAGTTAGAATTAGAAGAGAACAGGGAAATTTTAAAAACCCCTGTACATGGGGTATACTATGACCCATCAAAAGACTTAATAGCAGAAATACAGAAACAAGGGCAAGACCAATGGACATATCAAATTTATCAGGAACCCTTTAAGAATCTGAAAACAGGGAAATATGCAAAAAGGAGGTCCACCCACACTAATGATATAAAACAGTTAACAGAAGCAGTACAAAAAATAACCATGGAAAGCATAGTGATATGGGGAAAGACTCCTAAATTTAAATTACCCATACAAAAGGAAACATGGGAGACATGGTGGGCGGAGTATTGGCAGGCTACCTGGATTCCTGAGTGGGAGTTTGTCAATACCCCTCCTCTAGTAAAACTGTGGTACCAGTTAGAAAAAGAACCCATAGCAGGAGCAGAAACTTTCTATGTAGATGGGGCAGCTAATAGAGAGACTAAACTAGGAAAGGCAGGGTATGTCACTGACAGAGGAAGACAAAAAATTGTCTCCCTGACGGAGACAACAAATCAAAAGACTGAATTACATGCAATCTATTTGGCTTTACAGGATTCAGGATTAGAAGTGAACATAGTGACAGATTCACAGTATGCATTAGGAATCATTCAAGCACAACCAGAAAGGAGTGAATCAGAGATAGTCAATCAAATAATAGAAAAATTAATAGAAAAGGAAAGGGTCTACCTATCATGGGTACCAGCACACAAAGGGATTGGAGGAAATGAACAAGTAGACAAATTAGTCAGTTCTGGAATCAGGAAAGTGCTATTTTTAGATGGGATAGATAAGGCTCAAGAGGAACATGAAAGATATCACAGCAATTGGAGAGCAATGGCTCATGACTTTAATCTACCACCTGTAGTAGCAAAAGAAATAGTAGCTAGCTGTGATAAATGTCAGCTAAAAGGGGAAGCCATGCATGGACAAGTAGACTGTAGTCCAGGAATATGGCAACTAGATTGCACACATCTTGAAGGAAAAGTTATCCTGGTGGCAGTCCATGTGGCCAGTGGCTATATAGAAGCAGAAGTCATCCCAACAGAAACAGGACAGGATACAGCATACTTTATATTAAAACTAGCAGGAAGATGGCCAGTAAAAGTAATACATACAGACAATGGGCCCAATTTCATCAGTGCAACAGTTAAGGCAGCCTGTTGGTGGGCAGGTATCCAACAAGAATTTGGGATTCCCTACAATCCCCAAAGTCAAGGAGTAGTGGAATCTATGAATAAAGAATTAAAGAAAATCATAGGGCAGGTAAGAGATCAAGCTGAACACCTTAAGACAGCAGTACAAATGGCAGTATTCATTCACAATTTTAAAAGAAAAGGGGGGATTGGGGGATACAGTGCAGGGGAAAGAATAATAGACATAATAGCAACAGATATACAAACTAAAGAACTACAAAGACAAATTACAAAAATTCAAAATTTTCGGGTTTATTACAGGGACAGCAGAGATCCAATTTGGAAAGGACCAGCAAAACTCCTTTGGAAAGGTGAAGGGGCAGTAGTAATACAAGACAATAGTGACATAAAGGTAGTACCAAGAAGAAAAGCAAAGATCATTAGGGATTATGGAAAACAGATGGCAGGTGATGATTGTGTGGCAGGTAGACAGGATGAGGATTAGAACATGGAACAGTTTAGTTAAACATCATATGTATATTTCAAGGAAAGCTAAAGGTTGGGTCTATAAACATCACTATGAAAGCAGAAATCCAAGAATAAGTTCAGAAGTACACATCCCGCTAGGGGAGGCTAGAATAATAGTAAGAACATATTGGGGTCTGCACATAGGAGAAAAAGACTGGCACTTGGGTCATGGAGTCTCCATAGAATGGAGGCAAAACAGGTATCATACACAAATAGACCCTGATCTGGCAGACCATCTAATCCATCTGTATTATTTTGACTGTTTTTCAGAATCTGCCATAAGGAAAGCCATAATAGGAGAAATAGTTAGTCCTAGGTGTGAATATCAAGCAGGACATAACAAGGTAGGGTCTCTGCAATATTTGGCATTGAAAGCAGTAGTAGCTTCAACAAGGACAAAGCCACCTTTGCCTAGTGTTAGGAAATTAGTAGAGGATAGATGGAACAAGCCCCAGAAGACCAAGGGCCACAGAGGGAGCCATACAATGAATGGATGTTAGAACTGTTAGAGGAGCTCAAGCAGGAAGCTGTTAGACATTTCCCTAGGCACTGGCTACATGGCCTAGGACAATACATCTATAATACCTATGGGGATACCTGGGAAGGAGTTGAAGTTATCATAAGATATCTGCAACAACTACTGTTTGTCCATTTCAGAATTGGGTGCCAACATAGCAGGATAGGCATTATTCGAAGAAGAAGAGTAAGGGATGGAGCCAGTAGACCCTAAACTAGAGCCCTGGAACCATCCGGGAAGTCAGCCTAAAACTGCTTGTACCAAATGTTATTGTAAACGCTGTTGCTATCATTGCCAGTTGTGCTTTATAAACAAAGGCTTAGGCATCTCCTACGGCAGGAAGAAGCGACGACCCCGACGAAAGCCTTCTCCAAGCAATAAGGACCATCAAAATCCTATACCAAAGCAGTAAGTAGTAGTAATTAATATATGTAATGTTACCTTTAGTAATATTGGCAATAGTAGGACTGATAGTAGCTTTAATCTTAGCAATAGTTGTATGGACTATAGTATTCATAGAATATAAGAAAATTAAGAAGCAAAGGAAAATAGACTGGTTAATCAAAAGAATAAGTGAGAGAGCAGAAGACAGTGGCAATGAGAGTGATGGGGACACAGAGGAACTATCAGCACTTGTGGAGAGGGGGCATCTTATTCTTGGGAATATTGATAATCTGTAGCAATGCAGACAAATTGTGGGTCACAGTCTATTATGGGGTACCTGTGTGGAAAGAAGCAACACCCACTCTATTCTGTGCATCAGATGCTAAAGCATATGAGAAGGAGGTACATAATGTCTGGGCCACACATGCCTGTGTACCCACAGACCCCAACCCACAAGAAATAAACCTGGAAAATGTAACAGAAAATTTTAATATGTGGAAAAATAACATGGTAGAGCAGATGCAAGAAGATATAATCAGCTTATGGGATCAAAGCCTAAAGCCATGTGTAAAATTAACCCCGCTCTGCGTCATTTTAAATTGTAGCAATGCCAATACCAGCACCCATAGCAATAGCAGTAGCACCCAGAGCCCCATTAATGAAGAAATAAAAAACTGCTCTTACAATACTACCACAATACTAAGAGATAAGACACAAAAAGTTTATTCACTGTTTTATAGACTTGATGTAGTACAACTTGATGAAAGTGAAAATAAGAATACATCAGGTAGTAATACTCTGTATAGACTAATAAATTGTAATACCTCAACCATCACACAAGCGTGTCCAAAGGTAACCTTTGAGCCAATTCCTATACATTATTGTGCCCCAGCTGGTTTTGCGATTCTAAAGTGTAAGGATCCGAGATTCAATGGAACAGGGTCATGCAAGAATGTTAGCTCAGTACAATGTACACATGGAATTAAACCAGTAGCATCAACTCAACTGCTGTTGAATGGCAGTCTAGCAGAAGGAGGGAAAATAATGATTAGATCTGAAAATATTACAAACAATGCCAAAAACATAATAGTTCAGTTTACTAAGCCTGTACTAATTACTTGTATCAGACCCAACAACAATACAAGAAAAAGTATACGCTTTGGACCAGGACAAGCCTTCTATACAAATGAAATAATAGGGGACATAAGACAAGCACATTGTAATATCAACAAAACATTATGGAATGACACTTTACAAAAGGTAGCTGAACAATTAAGAGAGAAATTCCCTAAGAAAACCATAATCTTTACTAACTCCTCAGGAGGGGACCCAGAAATTACAACACTTAGTTTTAATTGTGCAGGAGAATTTTTCTATTGCAATACAACAGGCCTGTTTAATGGTACGTGGTGGAACAATGGTACGTGGAACGGGCCCTACACACCTAATAACACCAATGGAAGTATAATCCTCCCATGCAGAATAAAACAAATTATAAACATGTGGCAGAGAGTAGGAAGAGCAATGTATGCCCCTCCCATTGCAGGAATAATAAAGTGTACATCAAACATTACAGGAATAATATTGACAAGAGATGGTGGTAACAATGGGACTAATGAGACCTTCAGACCTGGAGGAGGAGATATGAGGGACAATTGGAGAAGTGAATTATATAAATATAAAGTAGTAAAACTTGAACCACTAGGAGTAGCACCTACCAGGGCAAAAAGAAGAGTGGTGGAGAGAGAAAAAAGAGCAGTTGGACTGGGAGCTGTCTTCCTTGGGTTCTTGGGAGCAGCAGGAAGCACTATGGGCGCGGCGTCACTAACGCTGACGGTACAGGCCAGACAATTATTGTCTGGTATAGTGCAACAGCAAAGCAATTTGCTGCAGGCTATAGAAGCTCAACAGCATCTGTTGAAACTCACAGTCTGGGGCATTAAACAGCTCCAGGCGAGGGTCCTGGCTGTGGAAAGATACCTAAAGGATCAACAGCTCCTGGGAATTTGGGGCTGCTCTGGAAAACTCATCTGCGCCACTACTGTGCCCTGGAACACTAGTTGGAGTAATAAGTCTCAGGATGAGATTTGGGACAACATGACCTGGTTGCAATGGGATAAAGAAATTAGCAATTACACAAACATAATATATAGGTTACTTGAAGAATCGCAAAACCAGCAGGAAAAGAATGAGCAAGACTTATTGGCATTAGACAAATGGGCAGATTTGTGGAGTTGGTTCAACATTTCACACTGGCTGTGGTATATAAGAATATTTATAATGATAGTAGGAGGCTTGATAGGATTAAGAATAGTTTTTGCTATAATTACTGTAGTAAATAGAGTTAGGCAGGGATACTCACCTGTGTCATTTCAGATCCCTACCCCAAGCCCAGAGGGTCCCGACAGGCCCAGAGGAACCGAAGAAGGAGGTGGAGAGCAAGGCAGAGACAGATCGATTCGATTAGTGAACGGGTTCTTCGCACTTGCCTGGGACGACCTACGGAGCCTGTGCCTCTTCAGTTACCACCGCTTGAGAGATTGCATATTGATTGCAGCGAGGACTGTGGAACTTCTGGGACACTGCAGTCTCAAGGGACTGAGACTGGGGTGGGAAGGTCTCAAGAATCTGTGGAATCTTCTGTTATACTGGGGTCGGGAACTGAAGAATAGTGCTATTAGCTTATTTGATACTATAGCAGTAGCAGTAGCTGAGTGGACAGATAGGGTTATAGAAATAGGGCAAAGAGCTTTCAGAGCTATTCTCAACATACCTAGAAGAATCAGACAGGGCTTAGAAAGGGCTTTACTATAAAATGGGGGGCAAGTGGTCAAAAAGGAGCATACCAGGATGGCCTGCTATTAGGGAGAGAATGAGAAGAACTCCTCCAACAGCACAAAGAACAGAAGCAGTGTCTCCAGCAGCACCAGGAGTAGGAGCAGTGTCTCAAGATTTAGCTACTCATGGAGCAGTCACAAGCAGTAATACAGCAGCTACTAATCCTGATTGCGCCTGGGTGGAAGCGCAAGAAGAGGAGAGTGAAGTAGGCTTCCCAGTCAGGCCACAGGTACCTTTAAGGCCAATGACCTTCAAGGGAGCGTTTGATCTCAGCTTCTTTTTAAAAGAAAAGGGGGGACTGGATGGGTTAATTTACTCCCAGAAAAGACAAGACATCCTTGATATGTGGGTCTACCACACACAAGGCTACTTCCCTGATTGGCAGAATTACACACCAGGGCCAGGGATCAGATACCCATTAACATTTGGATGGTGCTTCAAGCTAGTACCAGTAGAGCCATCTGAGGTAGAAGAAGCTACTCAGGGAGAGAACAACAGCTTATTACACCCTATATGCCAACATGGAGTAGATGACCCTGAAAGAGAAGTGTTAAGATGGGAGTTTGATAGAAGCCTGGCACGGAGACACAGAGCCCGAGAGCTGCATCCGGAGTACTACAAAGACTGCTGACACAGAAGTTGCTGACGGGGACTTTCCGCTGGGGACTTTCCAGGGAGGTGTGGTGTGGGCGGAGTTGGGGAGTGGCTAACCCTCAGATGCTGCATATAAGCAGCTGCTTCTCGCATGTACTGGGTCTCTCTTGTTGGACCAGATAGAGCCCGGGAGCTCTCTGGCTAGCAGGGGAACCCACTGCTTAAGCCTCAATAAAGCTTGCCTTGAGAGCTTC
>B.AU.95.MBCC54_AF042103_C.TZ.01.BD22_11_AY253321
CCCGAACAGGGACTTGAAAGCGAAAGAGAAACCAGAGGAGCTCTCTCGACGCAGGACTCGGCTTGCTGAAGCGCGCACGGCAAGAGGCGAGGGGCGGCGACTGGTGAGTACGCCAAAATTTTTGACTAGCGGAGGCTAGAAGGAGAGAGATGGGTGCGAGAGCGTCAATATTAAGCGGGGGAGAATTAGATAGATGGGAAAAAATTCGGTTACGGCCAGGGGGAAAGAAAAAATATCAATTAAAACATATAGTATGGGCAAGCAGGGAGCTAGAACGATTCGCAGTCAATCCTGGCCTGTTAGAAACATCAGAAGGCTGTAGACAAATACTGGGGCAGTTACAACCAGCCCTTCAGACAGGATCAGAAGAACTTAGATCATTATATAATACAGTAGCAACCCTCTATTGTGTGCATCAAAGGATAGAGATAAAAGACACCAAGGAAGCTTTAGAGAAGATAGAGGAAGAGCAAAACAAAAGTAAGAAAAAAACACAGCAAGCAGCAGCTGGCACAGGAAACAGCAGCCAGGTCAGCCAAAATTACCCTATAGTGCAGAACATCCAGGGGCAAATGGTACATCAGGCCCTATCACCTAGAACTTTAAATGCATGGGTAAAAGTAGTAGAGGAGAAGGCTTTTAGCCCAGAAGTAATACCCATGTTTTCAGCATTATCAGAAGGAGCCACCCCACAAGATTTAAACACCATGCTAAACACAGTGGGGGGACATCAAGCAGCCATGCAAATGTTAAAAGAGACCATCAATGAGGAAGCTGGAGAATGGGATAGATTGCACCCAGCGCAGGCAGGGCCTATTGCACCAGGCCAGATGAGAGAACCAAGGGGAAGTGACATAGCAGGAACTACTAGTACCCTTCAGGAACAAATAGGATGGATGACAAGTAATCCACCTATCCCAGTAGGAGAAATCTATAAAAGATGGATAATCCTGGGATTAAATAAAATAGTAAGGATGTATAGCCCTACCAGCATTCTGGACATAAGACAAGGACCAAAGGAATCCTTTAGAGACTATGTAGACCGGTTCTATAAAACTCTAAGAGCCGAGCAAGCTTCACAGGAGGTAAAAAATTGGATGACAGAAACCTTGTTGGTCCAAAATTCGAACCCAGATTGTAAGACTATTTTAAAAGCATTGGGACCAGCAGCTACACTAGAAGAAATGATGACAGCATGTCAGGGAGTGGGAGGACCCGGCCATAAAGCAAGGGTTTTGGCGGAAGCAATGAGCCAAGTAACAAATTCAGCTACCACAATGATGCAGAGAAGCAATTTTAGAAGCCAAAGAAAGAATGTTAAGTGTTTCAATTGTGGCAAAGAAGGGCACATAGCCACCAATTGCAGGGCTCCTAGGAAAAGGGGTTGTTGGAAATGTGGAAAGGAAGGACACCACATGACAGATTGTACTGACAGACAGGCCAATTTTTTAGGGAAGATCTGGCCTTCCTACAAGGGAAGGCCAGGAAACTTTCTTCAGAGCAGACCAGAGCCAACAGCCCCACCAGAAGAGAGCTTCAGGTTTGGGGAGGAGACAACAACTCCCTCCCAGAAGCAGGAGTCGATAGACAAGGAACTGTATCCCTTAACTTCCCTCAGATCACTCTTTGGCAACGACCCCTCGTCACAATAAAAATAGGAGGGCAACTAAAGGAAGCTCTATTAGATACAGGAGCAGATGATACAGTATTAGAAGAAATGAATTTGCCAGGAAGATGGAAACCAAAAATGATAGGGGGAATTGGAGGTTTTATCAAAGTAAGACAATATGATCAAATCCTCATAGAAATCTGTGGACATAAAGCTATAGGTACAGTATTAGTAGGACCTACACCTGTCAACATAATTGGAAGAGATCTGTTGACTCAGATTGGTTGCACTTTATATTTTCCCATTAGTCCTATTGATACTGTACCAGTAAAATTAAAGCCAGGAATGGATGGCCCAAAAGTTAAACAATGGCCATTGACAGAAGAAAAAATAAAAGCATTAGTAGAAATTTGTACAGAAATGGAAAAGGAAGGGAAAATTTCAAAAATTGGGCCTGAAAATCCATACAATACTCCAGTATTTGCCATAAAGAAAAAAGACAGTACTAAATGGAGAAAATTAGTAGATTTCAGAGAACTTAATAAGAAAACTCAAGACTTCTGGGAAGTTCAATTAGGAATACCACATCCCGCAGGGTTAAAAAAGAAAAAATCAGTAACAGTACTGGATGTGGGTGATGCATACTTTTCAGTTCCCTTAGATGAAAACTTCAGGAAGTATACTGCGTTTACCATACCTAGTATAAATAATGAGACACCAGGAATTAGATATCAGTACAATGTGCTTCCACAGGGATGGAAGGGATCACCAGCAATATTCCAAAGTAGCATGACAAAAATCTTAGAGCCTTTTAGAAAACAAAATCCAGACATAGTTATCTATCAATACATGGATGACTTGTATGTAGGATCTGACTTAGAGATAGGGCAGCATAGAACAAAAATAGAGGAACTGAGACAACATCTGTTGAAGTGGGGATTTACCACACCAGACAAAAAACATCAGAAAGAACCTCCATTCCTTTGGATGGGTTATGAACTCCATCCTGATAAATGGACAGTACAGCCTATAGTACTGCCAGAAAAAGACAGCTGGACTGTCAATGACATACAGAAGTTAGTGGGAAAATTAAATTGGGCAAGTCAGATTTACGCAGGAATTAAAGTAAAGCAATTATGTAAACTCCTTAGGGGAACCAAAGCACTAACAGAAGTAATACCACTAACAGAAGAAGCAGAGCTAGAACTAGCAGAAAACAGGGAAATTCTAAAAGAGCCAGTACATGGAGTGTATTATGACCCATCAAAAGATTTAATAGCAGAAATACAGAAGCAGGGGCAAGGCCAATGGACATATCAAATTTATCAAGAGCCATTTAAAAATCTGAAAACAGGAAAATATGCAAGAGTGAGGGGTGCCCACACTAATGATGTAAAACAATTAACAGAGGCAGTGCAAAAAATAAGCACAGAAAGCATAATAATATGGGGAAAGACTCCTAAATTTAAACTACCCATACAAAGAGAAACATGGGAAGCATGGTGGACCGAGTATTGGCAAGCCACCTGGATTCCTGAGTGGGAGTTTGTCAATACCCCTCCCCTAGTGAAGTTATGGTACCAGTTAGAGAAAGAACCCATAATAGGAGCAGAAACTTTCTATGTAGATGGAGCAGCTAACAGGGAGACTAAAATAGGGAAAGCAGGATATGTTACTAACAAAGGAAGACAAAAGGTTGTCCTCCTAACTGACACAACAAATCAGAAGACTGAGTTACAAGCAATTCATCTAGCTTTGCAGGATTCGGGATTAGAAGTAAACATAGTAACAGACTCACAATATGCATTAGGAATCATTCACGCACAACCAGATAAAAGTGAATCAGAAATAGTCAGTCAAATAATAGAGCAATTAATAAAAAAGGAAAAGGTCTACCTGGCATGGGTACCAGCACACAAAGGAATTGGCGGAAATGAACAAGTAGATAAATTAGTCAGTGCTGGAATCAGGAAAGTACTATTTTTAGATGGAATAGATAAGGCACAAGAAGAACATGAGAAATATCACAGTAATTGGAGAGCCATGGCTAGTGATTTTAACCTGCCACCGGTAGTAGCAAAAGAAATAGTAGCCAGCTGTGATAAATGTCAGCTAAAAGGAGAAGCCACGCATGGACAAGTAGACTGTAGTCCAGGAATATGGCAACTAGATTGTACACATCTAGAAGGAAAAGTTATCCTGGTAGCAGTTCATGTAGCCAGTGGATATATAGAGGCAGAAGTTATTCCAGCAGAGACAGGGCAAGATACAGCATACTTTCTCTTAAAATTAGCAGGAAGATGGCCAGTAAAAACAATACATACAGACAATGGCAGCAATTTCATCAGTACTACAGTTAAGGCCGCCTGTTGGTGGGCGGGGATCAAGCAGGAATTTGGCATTCCCTACAATCCCCAAAGCCAAGGAGTTGTAGAATCTATGAATAAAGAATTAAAGAAAATTATAGGACAGGTAAGAGATCAGGCTGAACATCTTAAGACAGCCGTACAAATGGCAGTATTCATCCACAATTATAAAAGAAAAGGGGGGATTGGGGGGTACAGTGCAGGGGAAAGAATAGTAGACATAATAGCAACAGACATGCAAACTAAAGAATTACAAAAACAAATTACAAGAATTCAACATTTTCGGGTTTATTACAGGGACAGCAGAGATCCACTTTGGAAAGGACCAGCAAAGCTTCTCTGGAAAGGTGAAGGGGCAGTAGTAATACAAGATAATAGTGACATAAAAGTAGTGCCAAGAAGAAAAGTAAAGATCATTAGGGATTATGGAAAACAGATGGCGGGTGATGATTGTGTGGCAAGTAGACAGGATGAGGATTAGAACATGGAAAAGTTTAGTAAAACACCATATGTATGTTTCAAGGAAAGCTACGGGATGGTTTTATAGACATCACTATGAAAGCCATCATCCAAAGATAAGTTCAGAAGTACACATCCCACTAGGGGAAGCTAGGTTGGTGATAACGACATATTGGGGTCTGCATACAGGAGAAAGAGACTGGCATTTGGGTCAGGGAGTCTCCATAGAATGGAGGAAAAGGGGATATAGCACACAAGTAGACCCCGGACTAGCCGACCAACTAATTCATATATATTACTTTGATTGTTTTTCAGAATCTGCTATAAGAAATGCCATATTAGGACATAGAGTTAGACCTAGTTGTGAATATCAAGCAGGACATAACAAGGTAGGATCTCTGCAGTACTTGGCACTAACAGCATTAATAACACCAAAAAAGATAAAGCCACCTCTGCCTAGTGTTGCGAAACTGACAGAAGATAGATGGAACAAGCCCCAGAAGACCAAGGGCCACAGAGGGAGCCATACAATGAATGGACACTAGAGCTTTTAGAGGAGCTTAAGAATGAAGCTGTTAGGCATTTTCCTAGGATATGGCTCCATGGCTTAGGGCAACATATCTATGAAACTTATGGGGATACTTGGGCAGGAGTGGAGGCCATAATAAGAATTCTGCAACAACTGCTGTTTATTCATTTCAGAATTGGGTGTCGACATAGCAGAGTAGGCATTACTCGACAGAGGAGAGCAAGAAATGGAGCCAGTAGATCCTAGACTAGAGCCCTGGAAGCATCCAGGAAGTCAGCCTAGGACTGCGTGTACCACTTGCTATTGTAAAAAGTGTTGCTATCATTGCCAAGTGTGTTTTATAACAAAAGGCTTAGGCATCTCCTATGGCAGGAAGAAGCGGAAACAGCGACGAAGACCTCCTCCAGACAGTCAGACTCATCAAGCTTCTCTATCAAAGCAGTAAGTAGCACATGTAATGCAATCTTTACAAATAGTAGCACTAGTAGCATTAGTAGTAGCAGTACTAATAGCAATAGTTGTGTGGTCCATAGTATTCATAGAATATAGGAAAATATTAAGACAAAGGAAAATAGACAGGTTGATTGATAGGATAAGAGAAAGAGCAGAAGACAGTGGCAATGACAGTGAAGGAGACCAGGAAGAATTATCAGCACTTGTGGACATGGGGCACCATGCTCCTTGGGATATTAATGATCTGTAGTGCGGCAGAACCATTGTGGGTCACAGTCTATTATGGGGTACCTGTGTGGAGAGAAGCAACCACCACTCTATTTTGTGCATCAGATGCTAAAGCATATGATACAGAGGTACATAATGTGTGGGCCACACATGCCTGTGTACCCACAGACCCCAGCCCACAAGAAATACCATTGGAAAATGTGACAGAAAAGTTTAACATGTGGAAAAATGACATGGTAGAACAGATGCATGAGGATATAATTAGTTTATGGGATCAAAGCCTAAAGCCATGTGTAAAATTAACCCCACTCTGTGTTACTTTAAATTGCACTGATGCTACTAAAACCAATAATAGTAGCGGGGGTACTAAAACCAATAATAGTAGCGGGGGAGCGGTGGGGGAAGGAGAAATAAAAAACTGCTCTTTCAATATCACCACAAGCATGAGAGATAAGGTGCAGAAACAATATGCTCTTTTTTATAAACTTGATGTAGTACCAATAGACAATAATAGTACTAATACCAGCTATAGGTTGATAAGTTGTAACACCTCAGTCATTACACAGGCCTGTCCAAAGGTATCTTTTGAGCCAATTCCCATACATTATTGTGCCCCGGCTGGTTTTGCGATTCTAAAGTGTAAAGATAAGAAGTTCAATGGAAAAGGACTATGTAAAAATGTCAGCACAGTACAGTGTACACATGGAATTAGGCCAGTAGTATCAACTCAACTGCTGTTAAATGGCAGCCTAGCAGAAGAAGAGGTAGTGATTAGATCTGACAATTTCACGAACAATGCTAAAACCATAATAGTACAGCTAAAAGAATCTGTAAAAATTAATTGTACAAGACCCAACAACAATACAAGAAAAAGTATAACTATAGGACCAGGGAAAGCATTTTATGCAACAGSAGAAATAATAGGAGACATAAGACAAGCACATTGTAACCTTAGTAGAGTAGACTGGAATGAGACTTTAAGACAGATAGCTATAAAATTAGGAGAACAATTTAAGAAGAACACAATAGTCTTTAATCCATCCTCAGGAGGGGACCCAGAAATTGTAATGCACAGTTTTAATTGTGGAGGGGAATTTTTCTACTGTGATACATCAAAACTGTTTAATGGTACATACAATGGTACAGACACGACAGGAAGTACTCCAAATTCAAACATCACACTCCAATGCAGAATAAAACAAATTATAAACAGGTGGCAGGGGGTAGGGCAAGCAATGTATGCCCCTCCCATTGCAGGACAAATTAGATGTACATCAAATATTACAGGGCTGATATTAACAAGAGATGGTGGTAATAACACGAACGAGACCGAGATCTTCAGACCTGGAGGAGGAGATATGAGGGACAATTGGAGAAGTGAATTATATAGGTATAAAGTAGTAAAAATTGAACCATTAGGAGTAGCACCCACCAAGGCAAAGAGAAGAGTGGTGCAGAGAGAAAAAAGAGCAGTGGGAATAGGAGCTGTGTTCCTTGGGTTCTTAGGAGCAGCAGGAAGCACTATGGGCGCAGCGTCACTGACGCTGACGGTACAAGCCAGACAATTATTGTCTGGTATAGTGCAGCAGCAGAGCAATTTGCTGAGGGCTATTGAGGCGCAACAGCATCTGTTGCAACTCACAGTCTGGGGCATTAAGCAGCTCCAGGCAAGAGTCCTGGCTGTGGAAAGATACCTAACGGATCAACAGCTCCTGGGGATTTGGGGTTGCTCTGGAAAACTCATTTGCACCACTGCTGTGCCTTGGAATGCTAGCTGGAGTAATAAATCTCTAGAGAAGATTTGGAATAACATGACCTGGAGGGAGTGGGAAAGAGAAATTCACAATTACACAAAATTAATATACTCCTTAATTGAAGAATCGCAAAACCAACAAGAAAAGAATGAACAAGAATTATTGGAATTAGACAATTGGGCAAGTTTGTGGAATTGGTTTGACATAACAAAATGGCTGTGGTATATAAAAATATTCATAATAGTAGTAGGAGGCTTGGTAGGTTTAAGAATAGTTTTTGCTGTAATTTCTATAGTGACTAGAGCTAGGCAGGGATACTCACCATTATCGTTTCAGACCCACCTCCCAGCCCCGAGGGGACCCGACAGGCCCGAAGGAATCGAAGAAGAAGGTGGAGAGAGAGACAGAGGCAGATCCACTCGATTAGTGCACGGATTCTTAGCACTTTTCTGGGACGACCTGAGGAGCCTGTGCCTCTTCAGCTACCACCACTTGAGAGACTTACTCTTGATTGTAACGAGGATTGTGGAACTTCTGGGACGCAGGGGATGGGAAGCCCTCAAATATTGGTGGAATCTCCTACAGTATTGGGGTCAGGAACTACAGAAGAGTGCTGTTAGCTTGCTCAATGCCACAGCCATCGCAGTAGCTGAGGGGACAGATAGAGTTCTAGAAGTATTACAAAGAGCTTATAGAGCCATTCTCCACATACCTAGAAGAATAAGACAGGGCCTCGAAATGGCTTTGCTATAAAATGGGTGGCAAGTGGGCAAAAGGTAGTGTACTTAGATGGCAGGCTGTAAGGGAAAAATAAAACGAGCTGAGCCAGCAGCAGAAGGGGTGGGAGCCAACAACTAACAATTCTGGTTGCGCCTGGCTAGAAGCACACTTTTTAAAAGAAAAGGGGGGACTGGAAGGGCTAATACGCTCCCAAAGAAGACAAGATATCCTTGATCTGTGGGGCTACCACACACAAGGCTACTTCCCTGATTGGCAGAACGACACACCAGGGCCAGGGACCAGATATCCACTGACCTTTGGATGGTGCTGCAAACGAGTACCAGGGGAAACAGAGAAGATAGAAGAGGCCAATGGAGGAGAAAACAACAGACTGTTCCGTTGGGGACTTTCCAAGGAGGCGTGGCCTGAGTGACTAAGTTCCGTTGGGGACTTTCCAAGGAGGCGCGGGGACTTTCCAAGGAGGCGCGGCCTGGGCGGGACTGGGGAGGGGCGAGCCCTCAGATGCTGCACATAAGCAGCTGCTCTCTGCCTGTACTGGGTCTCTCTGGTTAGACCACATCTGAGCCT
>B.CN.02.02HNsq4_DQ007902_D.UG.98.98UG57140_AF484511
TGGAAGGGCTAATTTACTCCCAAAGAAGACAAGATATCCTTGATCTGTGGGTCTACCATACACAAGGCTACTTCCCTGATTGGCAGAACTACACACCAGGGCCAGGGACTAGATTCCCTCTGACTTTTGGATGGTGCTTCAAGCTAGTACCAGTTGATCCAGAGAAGGTAGAAGAAGCCAACGAAGGAGAGAACAACAGCTTGTTACATCCTATGAGCCAACATGGAGCAGATGACCCAGAGAGAGAAGTGCTGATGTGGAAGTTTGACAGCCGCTTAGCATTCCAGCACATGGCCCGAGAGCTGCATCCGGAGTACTACAAAGACTGCTGACATCGAGCTTTCTACAAGGGACTTTCCGCTGGGGACTTTCCAGGGAGGCGTGGCATGGGCGGGACCGGGGAGTGGCGAGCCCGTAGATGCTGCATATAAGCAGCTGCTTTTTGCCTGTACGGGGTCTCTCTAGTCAGACCAGATCTGAGCCTGGGAGCTCTCTGGCTAACTAGGGAACCCACTGCTTAAGCCTCAATAAAGCTTGCCTTGAGTGCTTCAAGTAGTGTGTGCCCGTCTGTTGTGTGACTCTGGTAACTAGAGATCCCTCAGACCCATTTAGTCAGTGTGGAAAATCTCTAGCAGTGGCGCCCGAACAGGGACCTGAAAGCGAAAGTAAGACCAGAGGAGCTCTCTCGACGCAGGACTCGGCTTGCTGAAGCGCGCACAGCAAGAGGCGAGAGCGGCGACTGGTGAGTACGCCGAAAATTTTTGACTAGCGGAGGCTAGAAGGAGAGAGATGGGTGCGAGAGCGTCAGTATTAAGCGGGGGACAATTAGATAGATGGGAAAAAATTCGGTTAAGGCCAGGGGGAAAGAAAAAATATAGATTAAAACATATAGTCTGGGCAAGCAGGGAGCTAGAACGATTCGCAGTTAATCCTGGCCTGTTAGAATCATCGGAAGGCTGTAGACAAATACTAGAACAGCTACAACCAGCCCTTCGGACAGGATCAGAAGAACTTAGGTCATTATACAATACAGTAGCAGTCCTCTATTGTGTGCATCAAAGGATAGAGATAAAAGACACCAAGGAGGCTTTAGAGAAGATAGAGGAAGAGCAAAACAAAAGTAAGAAAAAGGCACAGCAAACAGCAGCTGACACAGGAAACAACAGCCAGGTCAGCCAAAATTACCCTATAGTGCAAAACCTCCAGGGGCAAATGGTACATCAGCCCATATCACCTAGAACTTTAAATGCATGGGTAAAAGTAATAGAAGAGAAGGCTTTTAGTCCAGAAGTAATACCCATGTTTTCAGCATTATCAGAAGGAGCCACCCCACAAGATTTAAACACCATGCTAAACACAGTGGGGGGACATCAAGCAGCCATGCAAATGTTAAAAGAAACCATCAATGAGGAAGCTGCAGAATGGGATAGATTGCATCCAGTGCAGGCAGGGCCAGTTGCACCAGGCCAGATGAGAGAACCAAGGGGAAGTGACATAGCAGGAACTACTAGTAATCTTCAGGAGCAAATAGGATGGATGACAAATAATCCACCTATCCCAGTAGGAGAAATCTATAAAAGATGGATAATCCTGGGGTTAAATAAAATAGTAAGAATGTATAGCCCTACCAGCATTCTGGACATAAGACAAGGACCAAAGGAACCCTTTAGAGACTATGTAGACCGGTTCTATAAAACTCTAAGAGCCGAGCAAGCTTCACAAGAGGTAAAAAATTGGATGACAGAAACCTTGTTGGTCCAAAATTCGAACCCAGATTGTAAGACTATTTTAAAAGCATTGGGACCAGCAGCTACACTAGAAGAAATGATGACAGCATGTCAGGGAGTGGGGGGACCTGGCCATAAAGCAAGAGTTTTGGCCGAAGCAATGAGCCAAGTAACAAATGCAACTAATATAATGATGCAGAGAGGCAATTTTAGGAGCCAAAGAAAGACTGTCAAGTGTTTCAATTGTGGCAGAGAAGGGCACATAGCCAAAAATTGCAAGGCCCCTAGGAAAAAGGGCTGTTGGAAATGTGGAAAGGAAGGACACCAAATGAAGGATTGTACTGAGAGACAGGCTAATTTTTTAGGGAAGATCTGGCCTTCCCACAAGGGGAGGCCAGGGAATTTTCTCCAGAGCAGACCAGAGCCAACAGCCCCACCAGAGGAGAGCTTCAGGTTTGGGGAAGAGACAACACCTCCATCTCAGAAGCAGGAGCAGATAGACAAGGAACTATATCCTTTAGCCTCCCTCAGATCACTCTTTGGCAACGACCCCTCGTCACAATAAAGATAGGGGGGCAATTAAAGGAAGCTCTATTAGATACAGGAGCAGATGATACAGTATTAGAAGACATGAATTTGCCAGGAAAATGGAAACCAAAAATGATAGGGGGAATTGGAGGTTTTATCAAAGTAAGACAGTATGATCAGATACCCATAGAAATTTGCGGACACAAGGCTGTTGGTACAGTATTAATAGGACCCACACCTGTCAACATAATTGGGAGAAATCTGTTGACTCAGCTTGGTTGCACTTTAAATTTTCCCATTAGTCCTATTGAAACTGTACCAGTAAAATTAAAGCCAGGAATGGATGGCCCAAAAGTTAAACAATGGCCATTGACAGAAGAAAAAATAAAAGCATTAGTAGAAATTTGTACAGAAATGGAAAAGGAAGGGAAAATTTCAAAAATAGGGCCTGAAAATCCATACAATACTCCAGTATTTGCCATAAAGAAAAAAGACAGTACTAAATGGAGAAAATTAGTGGATTTCAGGGAACTTAATAAAAGAACTCAAGACTTCTGGGAAGTTCAATTAGGAATACCACATCCCGCAGGATTGAAAAAGAAAAAATCCGTAACAGTCCTGGATGTGGGTGATGCATATTTTTCAGTCCCTTTAGATAAAGACTTCAGGAAATATACTGCATTTACCATACCTAGTGTAAACAATGAGACACCAGGGATCAGATATCAGTACAATGTGCTTCCACAGGGATGGAAAGGACCACCAGCAATATTCCAATGTAGCATGACAAAAATCTTAGAGCCTTTTAGAAAGCAAAATCCAGACATAGTTATCTATCAATACATGGATGACTTGTATGTAGGATCTGACTTAGAAATAGGGCAGCATAGAGCAAAAATAGAGGAACTAAGACAACATCTGTTGAGGTGGGGATTTACCACACCAGACAAAAAACATCAGAAGGAACCTCCATTCCTTTGGATGGGTTATGAACTCCATCCTGATAAATGGACAGTACAGCCTATAGAGCTGCCAGAAAAGGACAGCTGGACTGTCAATGACATACAGAAGTTAGTGGGAAAGTTGAATTGGGCAAGTCAGATTTATGCAGGGATTAAGGTAAAGGAATTATGTAAACTCATTAGGGGAACCAAAGCACTAACAGAAGTAGTACCACTATCAGAAGAAGTAGAGCTAGAACTGGCGGAAAACAGGGAAATTCTGAAAGAATCAGTACATGGAGTGTATTATGACCCATCAAAAGACTTAATAGCAGAAATACAGAAGCAGGGCCTAGGCCAATGGACATACCAAATTTATCAAGAGCCATATAAAAATCTGAAAACAGGAAAGTATGCAAGAATGAGGGGTGCCCACACTAATGATGTAAAACAATTAACAGAGGCAGTGCAAAAAATAGCCTCAGAAAGCATAGTAATATGGGGGAAGACTCCTAAATTTAAACTACCCATACAAAAGGAAACATGGGAAGCATGGTGGACAGAGTATTGGCAAGCCACCTGGATTCCTGAGTGGGAGTTTATCAATACCCCTCCCTTAGTGAAATTATGGTATCAGTTAGAAAAAGAACCCATAGAAGGAGCAGAAACTTTCTATGTAGATGGGGCAGCTAATAGAGAGACTAAATTAGGAAAAGCAGGATATGTTACTGACAGAGGAAGACAGAAAGTTGTCCCTCTAACTGACACAACAAATCAGAAGACTGAATTACAAGCCATTAATCTAGCTTTGCAGGATTCAGGAGTAGAAGTAAACATAGTAACAGACTCACAATATGCATTAGGAATCATTCAAGCACAACCAGATAAGAGTGAATCAGAATTAGTCAGTAAAATAATAGAGCAGTTAATAAAAAAGGAAAAGGTCTACCTGGCATGGGTGCCAGCACACAAGGGAATTGGAGGGAATGAACAAATAGATAAACTAGTCAGTGCTGGAATCAGGAAAGTACTATTTTTAGATGGAATAGATAAGGCCCAAGAAGAACATGAGAAATATCACAGTAACTGGAGAGCAATGGCTAGTGATTTTAACCTACCACCTGTGGTAGCAAAAGAAATAGTAGCCAGCTGTGATAAATGTCAGCTAAAAGGAGAAGCCATGCATGGACAAGTAGACTGTAGCCCAGGAATATGGCAACTAGATTGTACACATGTAGAAGGACAAATTATCCTGGTAGCAGTTCATGTAGCCAGTGGATATATAGAAGCAGAAATTATTCCAACAGAGACAGGGCAGGAAACAGCATACTTTATCCTAAAGTTAGCAGGAAGATGGCCAGTGAAAGCAATACATACAGACAATGGCAGAAATTTTACCAGTAATGCGGTTAAGGCCGCCTGTTGGTGGGCGGGGATCAAGCAGGAATTTGGCATTCCCTACAATCCCCAAAGTCAAGGAGTAGTAGAATCTATGAATAATGAATTAAAGAAAATTATAGGACAGGTAAGAGATCAAGCTGAACATCTTAAGACAGCAGTACAAATGGCAGTATTCATCCACAATTTTAAAAGAAAAGGGGGGATTGGGGGGTACAGTGCAGGGGAAAGAATAGTAGACATAATAGCAACAGACATACAAACTAGAGAATTACAAAAACAAATTACAAAAATTCAAAATTTTCGGGTTTATTACAGGGACAGCAGAGATCCACTTTGGAAAGGACCAGCAAAGCTCCTTTGGAAAGGTGAAGGGGCAGTAGTAATACAAGATAATAGTGACATAAAAGTAGTGCCAAGAAGAAAAGCAAAGATCATTAGGGATTATGGAAAACAGATGGCAGGTGATGATTGTGTGGCAAGTAGACAGGATGAGGATTAGAACATGGAAAAGTTTAGTAAAACACCACATGTATATTTCAAAGAAAGCCAAGGGATGGGTTTATAAACATCACTATGATAGCACTCATCCAAAAATAAGTTCAGAAGTACACATCCCACTAGGGGATGCTAAATTGGTAATAACAACATATTGGGGTCTGCATACAGGAGAAAAAGACTGGCATTTGGGCCAGGGAGTCTCCATAGAATGGAGGAGAAAGAGATATAGCACACAAGTAGAACCTGGCCTAGCAGACCAACTAATTCATCTGTATTATTTTGATTGTTTTTCAGAATCTGCTATAAGAAATGCCATTTTAGGACGTGTAGTTAGCCCTAGTTGCGATTATATAGCAGGACATAACAAGGTAGGATCCCTACAGTACTTGGCACTAGCAGCATTAGTAACACCAAAAAGGAGAAAGCCACCTTTGCCTAGTGTTGCGAAACTGACAGAGGATAGATGGAACAAGCCCCAGAGGACCAAGGGCCACAGAGGGAACCATACAATGAGTGGACACTAGAGCTTTTAGAGGAGCTTAAGAGGGAAGCTGTTAGACATTTTCCTAGGAGATGGCTCCATGAGTTGGGACAACATATCTATGAAACATATGGGGATACTTGGACAGGAGTGGAAGCCATAATAAGAATTCTGCAACAACTGCTGTTTATTCATTTCAGAATTGGGTGTCAACATAGCAGAATAGGCATTACTCTACAGAGGAGAGCAAGAAATGGAGCCAGTAGATCCTAGATTAGAGCCTTGGAAGCATCCAGGAAGTCAGCCTAAAACAGCTTGTACCAATTGCTATTGTAAAAAGTGCTGCTTTCATTGCCAAGCTTGTTTCATAGAAAAAGGCTTAGGCATCTCCTATGGCAGGAAGAAGAGAAGACAGCGACGAAGAGCTCCTCAAGACAGTCAGACTCATCAAGCGTCTCTATCAAAGCAGTAAGTAGTAAATGTAATGCAAGCTTTAACTATTTTAGCAATAGTAGCCTTAGTAGTAGCAACAATAATAGCAATAGTTGTGTGGACCATAGTATTCATAGAATATAAGAAAATATTAAGACAGAGAAAAATAGATAGGTTAATTGATAGAATAAGAGAAAGAGCAGAAGACAGTGGCAATGAGAGTGACGGGGATCAGGAGGAATTATCAGCATTTATGGAGATGGGGCACCATGCTCCTTGGGATGTTGATGATCTGTAGTGCTGTAGAAAACTTGTGGGTCACAGTCTATTATGGGGTACCTGTATGGAAAGAAGCAACTACCACTCTATTTTGTGCATCAGATGCTAAAGCATATGATACAGAGGTACATAATATTTGGGCCACACATGCCTGTGTGCCCACAGACCCCAGCCCACAAGAAGTAGTCTTGGGAAATGTGACAGAAAACTTTAACATGTGGAAAAATGACATGGTAGAACAGATGCATGAAGATATAATCAGTTTATGGGATCAAAGCCTAAAGCCATGTGTAAAATTAACCCCACTCTGTGTTACTTTAAATTGCACTAATTTGAATACTACCAATAGTAATACCAGTAGTACGACAGAGGGAGGAGGAATGAAAAACTGCTCTTTCAATATCACCACAAGCATAAGAACTAAGGTGAAAGACTATGCACTTTTTTATAAACTTGATATAGTACCAATAGATAATAATGATAACAATACCAGCTATAGGTTGATAAATTGTAACACCTCAGTCATTACACAAGCTTGTCCAAAGGTATCCTTTGAGCCAATTCCCATACATTATTGTACCCCGGCTGGTTTTGCGATTCTAAAGTGTAACAATAAAACGTTCAATGGAACAGGACCATGTACAAATGTCAGTACAGTACAATGTACACATGGAATTAGGCCAGTAGTATCAACTCAACTGCTGTTAAATGGTAGTTTAGCAGAAGAAGGGGTAGTAATTAGATCTAGCAATTTCACGGACAATGCTAAAGTCATAATAGTACAGCTGAATAAATCTGTAGAAATTAATTGTACAAGACCCAACAACAATACAAGAAAAAGTATAAATCTAGGACAAGGGCGAGCATGGTATACAACAGGACAAATAATAGGAGATATAAGACAAGCACATTGTAACCTTAGTAGAACACAATGGAATAACACTTTAAAAATGATAACTGAAAAATTAAGAGAACAATTTGGGAACAACAAAACAATAATCTTTAATCAATCTTCAGGAGGGGATCCAGAGATTGTAATGCACAGCTTTAATTGTGGAGGGGAATTTTTCTACTGCAATACATCACAACTGTTTAATAGTACTTGGACTTGGAATGATACTAGTACTTGGAATGATACTACAGGAAATGACACTATCACACTCCCTTGCAGAATAAAACAAATTGTAAACATGTGGCAGGAAGTAGGGAAAGCAATGTATGCCCCTCCCATTGCAGGACAAATTAGATGTTCATCAAATATTACAGGGTTGCTATTAACAAGAGATGGTGGTACTAATGAGAACAATACCACCGAGATCTTCAGACCTGGAGGAGGAAATATGAGAGACAATTGGAGAAGTGAATTATATAAATATAAAGTAGTAAAAATTGAACCATTAGGAGTAGCACCCACCAAGGCAAAGAGAAGAGTGGTGCAGAGAGAAAAAAGAGCAGTGGGAACGATAGGAGCTATGTTCCTTGGGTTCTTAGGAGCAGCAGGAAGCACTATGGGCGCAGCGTCAATAACGCTGACGGTACAGGCCAGACAATTGTTGTTTGGTATAGTGCAACAGCAAAGAAATTTGCTGAGAGCTATTGAGGCGCAACAGCATCTGTTGCAACTCACAGTCTGGGGCATCAAGCAGCTCCAGGCAAGAGTCTTGGCTGTGGAAAGATACCTAAAGGATCAACAGCTCCTAGGGATTTGGGGTTGCTCTGGAAAACTCATTTGCACCACTGCTGTGCCTTGGAATGCTAGTTGGAGTAATAAATCTCTGAGTGAGATTTGGGATAACATGACTTGGATGGAATGGGAGAGAGAAATAGGCAATTACACAAGAGAAATATACACCTTAATTGAACAATCGCAGAACCAACAAGAAAAGAATGAACTAGAACTATTGGAATTGGATCAGTGGGCAAGCTTGTGGAATTGGTTTGACATAACAAAATGGCTGTGGTATATCAAAATATTCATAATGATAGTAGGAGGCTTGGTGGGTTTAAGAATAGTTTTTGCTGTACTTTCTATAGTAAATAGAGTTAGGCAGGGATACTCACCATTGTCATTGCAGACCCGCCTCCCAACCCAGAGGGGACCCGACAGGCCCGAAGGAATCGGAGAAGAAGGTGGAGAGCAAGACAGAGACAGATCCGAGAGATTAGCGAACGGATTCTTGACATTTTTCTGGGAGGATCTACGGAGCCTGTGCCTCTTCAGCTACCACCGCTTGAGAGACTTACTCTTGATTGCAGCAAGGATTGTGGAACTTCTGGGACGCAGGGGGTGGGAAGCCCTCAGATATTGGTGGAATCTCCTGCAGTATTGGATTCAGGAACTAAAGAATAGTGCTATTAGCTTGCTTAACGCCACAGCCATAGCAGTAGCTGAGGGGACAGATAGGGTTATAGAAGTAGCACAAAGAGCTTATAGGGCTATTCTCAACGTACCTACAAGAATCAGACAGGGCCTCGAAAGGGCTTTACTATAAGATGGGTGGCAAGTGGTCAAAGTGTGGTATGGGTGGATGGCCTAGTGTAAGGGAAAGAATGAGACGAGCTGAGCCAGCAGCAGATGGGGTGGGAGCAGTATCTCGAGACCTGGAAAAACATGGAGCAATCACAAGTAGCAATGCAAGAAATGCTGATTGTGTCTGGCTAGAAGCACAAGAGGAGGA
>B.KR.04.04KMH5_DQ295193_F1.BE.93.VI850_AF077336
TCTGTGGATCTACCACACACAAGGCTACTTCCCTGATTGGCAGAACTACACACCAGGGCCAGGGACCAGATTTCCACTGACCTTTGGGTGGTGCTTCAAGCTAGTACCAGTGGAGCCAGAAAGGGTAGAAGAGGCCACTGAAGGAGAGAACAACTGCTTGTTACACCCCATAAACCTGCATGGAATGGATGACCCGGAGGGAGAAGTGTTAGAGTGGAGATTTGACAGCCGCCTAGCACTTCGTCACCTGGCCCGAGAGAAACATCCGGAGTACTTCAAGGACTGCTGACACTGAGCTAAGGACTGCTGACACTGAGCTTTCTACAAGGGACTTTCCGCTGGGGATTTACCGGGGAGGCGTGGCCTGGGCGGGACTGGGGAGTGGCGAACCCTCAGATGCTGCATAAAAGCAGCTGCTTTTTGCCTGTACTGGGTCTCTCTGGTTAGACCAGATCTGAGCCTGGGAGCTCTCTGGCTAGCTAGGGAACCCACTGCTTAAGCCTCAATAAAGCTTGCCTTGAGTGCTTTAAGTAGTGTGTGCCCGTCTGTTGTGTGACTCTGGTAACTAGAGATCCCTCAGACCAATTTAGTCAGTGTGGAAAATCTCTAGCAGTGGCGCCCGAACAGGGACTTGAAAGCGAAAGTAGAACCGGAGGAGCTCTCTTGACGCAGGACTCGGCTTGCTGAAGCGCGCACGGCAAGAGGCGAGGGGCGGCGACTGGTGAGTACGCCAAAATTTTTGACTAGCGGAGGCTAGAAGGAGAGAGATGGGTGCGAGAGCGTCAGTATTAAGCGGGGGAAAATTAGATAAATGGGAAAGAATTCGGTTAAGGCCAGGAGGAAAGAAAAAATATAGGTTAAAACATCTAGTATGGGCAAGCAGGGAGCTAGAACGATTCGCAGTTAATCCTGGCCTGTTAGAAACATCAGAAGGCTGTAGACAAATATTGGCACAGCTACAACCATCCCTTCAGACAGGATCAGAAGAACTTAAATCACTATTTAATACAGTAGCAACCCTCTATTGTGTACATCAAGGGATAGAGATAAGAGACACCAAGGAAGCTTTAGAGAAGATAGAGGAAGAGCAAAACAAAAGTAAGAAAAAGGCACAGCAAGCAACCGCTGGCGCAGGAAACAGCAGCCAGGTCAGCCAAAATTACCCTATAGTGCAGAACCTACAGGGGCAAATGGTACATCAGCCCCTATCACCTAGAACTTTAAATGCATGGGTAAAAGTAGTAGAAGAGAAGGCTTTCAGCCCAGAAGTAATACCCATGTTTTCAGCATTATCAGAGGGAGCCACCCCACAAGATTTAAACACCATGCTAAACACAGTGGGGGGACATCAAGCAGCTATGCAAATGTTAAAAGAGACCATCAATGAGGAAGCTGCAGAATGGGATAGATTACATCCAGTGCATGCAGGGCCAATTGCACCAGGCCAGATGAGAGAACCAAGGGGAAGTGACATAGCAGGAACTACTAGTACCCTTCAGGAACAAATAGCATGGATGACAAATAATCCACCTATCCCAGTAGGAGAAATCTATAAAAGATGGATAATCCTGGGATTAAATAAAATAGTAAGAATGTATAGCCCTACCAGCATTCTGGACATAAGACAAGGACCAAAGGAACCCTTTAGAGACTATGTAGACAGGTTCTATAAAACTCTAAGAGCCGAGCAAGCGTCACAGGAGGTAAAAAATTGGATGACAGAAACCTTGTTGGTCCAAAATGCAAACCCAGATTGTAAGACTATTTTAAAAGCATTGGGACCAGGAGCTACACTAGAAGAAATGATGACAGCATGTCAGGGAGTGGGAGGACCCAGCCATAAAGCAAGAGTCTTGGCTGAAGCAATGAGCCAAGCAACAAATTCAGCTACCATAATGATGCAGAGAGGCAATTTCAGGAACCAAAGAAAGATTGTTAAGTGTTTCAATTGTGGCAAAGAAGGGCACATAGCCAAAAATTGCAGGGCCCCTAGGAAAAAGGGCTGTTGGAAATGTGGAAAGGAAGGACACCAAATGAAAGACTGTACTGAGAGACAGGCTAATTTTTTAGGGAAAATCTGGCCTTCCCACAAGGGAAGGCCAGGGAATTTTCTTCAGAGCAGACCAGAGCCAACAGCCCCACCAGAAGAGAGCTTCAGGTTTGGGGAAGAGACAACAACTCCCTCTCAGAAGCAGGAGACGATAGACAAGGAACTGTATCCTTTAGCTTCCCTCAGATCACTCTTTGGCAACGACCCCTCGTCAAAATAAAGATAGGGGGGCAAATAAAGGAAGCTCTATTAGATACAGGAGCAGATGATACAGTATTAGAAGAAATGAATTTACCAGGGAGATGGAAACCAAAAATGATAGGGGGAATTGGAGGTTTTATCAAAGTAAGACAATATGATCAGATAGCCATAGAAATCTGTGGACATAAAGCTGTAGGTACAGTATTAATAGGACCTACACCTATCAACATAATTGGAAGAAATCTGTTGACTCAGCTTGGCTGCACTTTAAATTTTCCCATTAGTCCTATTGAAACTGTACCAGTAAAATTAAAGCCAGGAATGGATGGCCCAAAAGTTAAACAATGGCCATTGACAGAAGAAAAAATAAAGGCATTAGTAGAAATTTGTACAGAAATGGAAAAGGAAGGAAAAATTTCAAAAATTGGGCCTGAAAATCCATATAATACTCCAGTTTTTGCCATAAAGAAAAAAGACAGTACTAAATGGAGAAAATTAGTAGATTTCAGGGAACTTAATAAGAGAACTCAAGACTTCTGGGAAGTTCAATTAGGAATACCACATCCAGCAGGGTTAAAAAAGAAAAAATCAGTAACAGTACTGGATGTGGGTGATGCATATTTTTCAGTTCCCTTAGATGAAGACTTCAGGAAGTATACTGCATTTACCATACCTAGTATAAACAATGAGACACCAGGGATTAGATATCAGTACAATGTGCTTCCACAGGGGTGGAAAGGGTCACCAGCGATATTTCAAAGTAGCATGACTAAAATCTTAGAGCCTTTTAGAAAACAAAATCCAGACATAGTTATCTATCAATACATGGATGATTTATATGTAGGATCTGACTTAGAAATAGGGCAGCATAGAATAAAAATAGAGGAACTGAGAGAACATCTGTTGAAATGGGGATTCACCACACCAGACAAAAAACATCAGAAAGAACCTCCATTCCTTTGGATGGGTTATGAACTCCATCCTGATAAATGGACAGTACAGCCTATAATATTACCAGAAAAAGACAGCTGGACTGTCAATGACATACAGAAGTTAGTGGGAAAACTGAATTGGGCAAGTCAGATTTATGCAGGGATTAAAGTAAGGCAATTATGTAAGCTCCTTAGGGGAACCAAGGCACTAACAGAAGTAGTACCACTAACAGAAGAAGCAGAGCTAGAACTGGCAGAAAACAGGGAAATTTTAAAAGAACCGGTACATGGAGCGTATTATGACCCGTCAAAAGACTTAATAGCAGAAATACAGAAGCAGGGGCTAGGCCAATGGACATATCAAATTTATCAAGAGCCATTTAAAAATCTGAAAACAGGAAAATATGCAAGAATGAGGGGTGCCCACACTAATGATGTAAAACAATTAACAGAGGCAGTGCAAAAAATAGCCACAGAAAGCATAGTAATATGGGGAAAGACTCCTAAATTTAAGCTACCCATACAAAAAGAAACATGGGAAGCATGGTGGACAGAGTATTGGCAAGCCACTTGGATTCCTGAGTGGGAGTTTGTCAATACCCCTCCCTTAGTGAAATTATGGTACCAGTTAGAAAAAGAACCCATAGTAGGAGCAGAAACTTTCTATGTAGATGGGGCAGCTAATAGGGAAACTAAATTAGGAAAAGCAGGATATGTTACTGACAGAGGAAGACAAAAGGTTGTCCCCCTAACGGACACAACAAATCAGAAGACTGAGTTACAAGCAATTCATCTAGCTTTGCAGGATTCGGGATTAGAAGTAAACATAGTAACAGACTCACAATATGCATTAGGAATCATTCAAGCACAGCCAGATAAAAGTGAATCAGAGTTAGTCAGCCAAATAATAGAGCAGTTAATAAAAAAGGAAAAGGTCTACTTGGCATGGGTACCAGCACACAAAGGAATTGGAGGAAATGAACAAATAGATAAATTAGTCAGTGCTGGAATCAGGAAAGTACTATTTTTAGATGGAATAGATAAGGCCCAAGAAGAGCATGAAAAATATCACAGTAATTGGAGAGCAATGGCTAGTGATTTTAACCTGCCACCTATAGTAGCAAAAGAAATAGTAGCCAGCTGTGATAAATGTCAGCTAAAAGGAGAAGCCATGCATGGGCAAGTAGACTGTAGTCCAGGAATATGGCAGCTAGATTGTACACATTTAGAAGGAAAAATTATCATAGTAGCAGTTCATGTAGCCAGTGAGTACATAGAAGCAGAAGTTATTCCAGCAGAAACAGGACAGGAAACAGCCTACTTCATATTAAAGTTAGCAGGAAGATGGCCAGTAAAAATAATACATACAGACAATGGCAGCAATTTCACCAGTGCCGCGGTTAAGGCATCCTGTTGGTGGGCAGGGATCAAGCAGGAATTTGGCATTCCCTACAATCCCCAAAGTCAAGGAGTAGTAGAATCTATGAATAAAGAATTAAAGAAAATTATAGGACAGGTAAGAGATCAGGCTGAACATCTTAAGACAGCAGTACAAATGGCAGTATTCATCCACAATTTTAAGAGAAAAGGGGGGATTGGGGGGTACAGTGCAGGGGAAAGAATAGTAGACATAATAGCAACAGACATACAAACCAAAGAACTACAAAAACAAATTACAAAAATTCAAAATTTCCGGGTTTATTACAGGGACAGCAGAGATCCACTTTGGAAAGGACCAGCAAAGCTTCTCTGGAAAGGTGAAGGGGCAGTAGTAATACAAGATAATAGTGACATAAAAGTAGTGCCAAGAAGAAAAGTAAAGATCATTAGGGATTATGGAAAACAGATGGCAGGTGATGATTGTGTGGCAAGTAGACAGGATGAGGATTAGAACATGGAAAAGTTTAGTAAAACACCATATGTATATTTCAAAGAAAGCTAAGGAATGGGTCTATAGACATCACTATGAAAGCACTCATCCAAGAATAAGTTCAGAAGTACACATCCCACTAGGGGATGCTAAATTAGTAATAACTACATATTGGGGTCTGCATACAGGAGAAAGAGAATGGCATCTGGGTCAAGGAGTCTCCATAGAATGGAGGAAAGAGAGATATATCACACAAGTAGACCCTGACCTAGCAGACAAACTAATTCACCTGCATTATTTTGATTGTTTTTCAGACTCTGCTATAAGACATGCCATATTAGGACATGTAGTTAGGCCTCAGTGTGAATATCAAGCAGGACATAACARGGTAGGGTCTCTACAGTACTTGGCACTAAGAGCATTAATAACACCAAAAAAGATAAAGCCACCTTTGCCTAGTGTTAGGAAACTAACAGAGGATAGATGGAACAAGCCCCAGAAGACCAAGGGCCACAGAGGGAGCCATACAATGAGTGGACACTAGAGCTCTTAGAGGAACTTAAGAGTGAAGCTGTTAGACATTTTCCTAGGCCATGGCTCCATGGCTTAGGACAACATATCTATGAAACTTACGGGGATACTTGGGCAGGAGTAGAAGCCATAATAAGAATTCTGCAACAACTGCTGTTTATCCATTTCAGAATTGGATGTCAACATAGCAGAATAGGCATTACTCGACAGAGAAGAGCAAGGAATGGAGCCAGTAGATCCTAGACTAGAGCCCTGGAAGCATCCAGGAAGTCAGCCTAAGACCCCTTGTACCAATTGCTATTGTAAAAAGTGTTGTTTACATTGTCAAGTTTGCTTCATAAAAAAAGGCTTAGGCATATACTATGGCAGGAAGAAGCGGAGACAGCGACGAAGAGCTCCTCAGGACAATAAGAATCATCAAGTTTCTCTACCAAAGCAGTAAGTAATACATGTGATGCAACCTTTAGTAATAGTAGCAATAGTAGCATTAGTAGTAGCAACAATAATAGCAATAGTTGTGTGGACCATAGTACTCATAGAATATAAGAAAATATTAAAACAAAGAAAAATAGACAAGATAATTGATAGAATAAGAGAAAGAGCAGAAGACAGTGGCAATGAGAGTGAAGGGGATCAGGAAGAATTACTGGTGGAAATGGGGCACCATGCTCCTTGGGATGTGGATGATCTGTAGTGTTGCAGGAGGATTGTGGGTCACAGTCTATTATGGGGTACCTGTGTGGAAAGAAGCAACTACCACTCTATTTTGTGCATCAGATGCTAAGGCATATGACACAGAGGTACATAATGTTTGGGCCACACATGCATGTGTACCCATAGACCCCAACCCACAAGAAGTAGTATTGGCAAATGTGACAGAAAATTTTAACATGTGGAAAAATAACCTGGTAGAACAAATGCATGAGGATATAATCAGTTTATGGGATGAAAGCCTAAAGCCATGTGTAAAATTAACTCCACTCTGTGTTACTTTAAATTGTAGTAATTACAATGGGACTAGTACCAATGGGACTAATATCAATAATAGTAGTAGGATGGAGGAAGGAGAAATGAAAAACTGCTCTTTCAATGTTACCACAACCATAAGAGATAGGGTGCAGAAGGAATATGCTCTTTTTTATAAACTTGATGTAGTACCAATAGATAATGATAATACAAGCTATACATTGATAAATTGTAACTCCTCAACCCTTACACAGGCCTGTCCAAAAGTATCCTTTGAACCAATTCCCATACATTATTGTACCCCGGCTGGTTTTGCGATTCTAAAGTGTAATAATAAGACGTTCAATGGAACAGGACCATGTTCAAATGTCAGCACAGTACAATGTACACATGGGATTAGGCCAGTAGTATCAACTCAACTGCTGTTAAATGGCAGTCTAGCAGAAGAAGAGATAGTAATTAGATCTGAAAATATCACAGACAATGCTAAAACCATAATAGTACAGCTGAACGCATCTGTACAAATTAATTGTACAAGACCCAACAACAATACAAGAAAAAGTATAAGGATAGGACCAGGGAGCACATTCTATGCAACAGGGGACATAATAGGAGATATAAGACAAGCACATTGTAACATTAGTGAAAAAGAATGGAACAACACTTTACAACAGCTAGYTATAAAATTAAGAGAACACTTTGGGAATAAAACAATAATCTTTAATGAATCCTCAGGAGGGGACCCAGAGATTGTAATGCACAGTTTTAATTGTGGAGGGGAATTTTTCTACTGTAATACAACACAACTGTTTAATAGTACTTGGCTGCTTAATGATACTGGGAATGAGAGTAAACAGCCAAATGAAACTATCACACTCCCATGCAGAATAAAACAAATTATAAACAGGTGGCAGGAAGTAGGAAAAGCAATGTATGCCCCTCCCATCAGCGGACAAATTAGATGTTCATCAAATATTACAGGGCTGTTGTTAACAAGAGATGGGGGGAATACTAATGAGACTGGGAATGGGACTGAGACCTTCAGACCTGGGGGAGGAGATATGAGGGACAATTGGAGAAGTGAATTATATAAATATAAAGTAGTACAAATTGAGCCATTAGGGATAGCACCCACTAAGGCAAGGAGAAGAGTGGTGCAGAGAGAAAAAAGAGCAGTGGGAGTAATAGGAGCTATGTTCCTTGGGTTCTTGGGAGCAGCAGGAAGCACTATGGGCGCAGCGTCAGTGACGTTGACGGTACAGGCCAGACTATTATTGTCTGGTATAGTGCAACAGCAAAATAATTTGCTGAGAGCTATTGAGGCGCAACAGCATCTGTTGCAACTCACAGTCTGGGGCATCAAGCAGCTCCAAGCAAGAGTCCTGGCTGTGGAAAGATACCTAAAGGATCAACAGCTCCTGGGGATTTGGGGATGCTCTGGAAAGCTCATCTGCACCACTAATGTGCCTTGGAATACTAGTTGGAGTAATAAAACTCTAGAATATATCTGGGGTAACATGACCTGGATGGAGTGGGACAGAGAAATTAACAATTACACAGACTTAATATACAACTTACTTGAAAAATCGCAGAACCAACAAGAAAAGAATGAACAGGAATTATTGGAATTGGATAAATGGTCAAGCTTGTGGAATTGGTTTGACATAACACAATGGCTGTGGTATATAAGAATATTCATAATGATAGTAGGAGGCTTGGTAGGTTTAAGAATAATTTTTTCTGTACTTTCTATAGTGAATAGAGTTAGGCAGGGATACTCACCATTATCGTTTCAGACCCACTTCCCAAGCCCGAGGGGACCCGACAGGCCAGGAGGAATCGAAGGAGAAGGTGGAGAAGGAGACAGGGATGGATCCGGTCGATTAGTGAATGGATTCTTAACACTCGTCTGGGTCGACCTGCGGAGCCTGTGCCTCTTCAGCTACCGCCGCTTGAGAGACTTACTCTTGATTGTAGCGAGGGGTGTGGAACTTCTGGGACTCAGGGGGTGGGAAATCCTCAAATATTGGTGGAGTCTCCTGCAGTACTGGAGTCAGGAGCTAAAGAAGAGTGCTGTTAGTTTGCTTAATGCCACAGCTAGAGTAGTAGCAGAGGGGACAGATAGGGTTATAGAAATATTACAAAGAGCTTATAGAGCTATTATCCACATACCTAGAAGAATAAGACAGGGCTTGGAAAGGGCTTTGCTATAAAATGGGTGGCAAGTGCTCAAAACATAGTTTTCCTGGGTGGGATACTATAAGGGARAGAATGAGACGAACTGGGCCAAGGGAAAGAAGAAATGARCCAGCAGCAGAAGGGGTGGGAGCAGTATCTCGAGATCTGGAACAACGTGGCGCAATCACAACTAGTAATACAGCAAGTAACAATGCTGCTTGTGCCTGGCTAGAAGCACAAGAGGAGGA
>B.CO.01.PCM039_AY561239_F2.CM.97.CM53657_AF377956
GCGAGAGCGTCAGTATTAAGCGGGGGAAAATTAGATCAGTGGGAAAAAATTCGGTTAAGGCCAGGGGGAAGCAAAAGATATAGATTAAAACATTTAGTATGGGCAAGCAGGGAGCTGGAACGATTCGCAGTCAATCCTGGCCTGTTAGAAACATCAGAAGGCTGCAGACAAATACTGGGACAGCTACAACCGTCCCTTCAGACAGGATCAGAAGAACTTAAATCACTATATAATGCAGTAGCAGTCCTCTATTGTGTACATCAAAGGATAGATGTAAAAGACACCAAGGAAGCTTTAGACAAAATAGAGGAAGAGCAAAACAAAAGTAAGAAAAAAGCACAGCAAGCAGCAGCTGACACAGGAAACAACAGTCAGGTCAGCCAAAATTACCCTATAGTGCAGAACCTCCAAGGGCAAATGGTACATCAGGCCATATCACCTAGAACTTTAAATGCATGGGTAAAAGTAGTAGAAGAAAAAGCTTTCAGCCCAGAAGTAATACCCATGTTTGCAGCATTATCAGAAGGAGCCACCCCACAAGATTTAAACACCATGTTAAACACAGTGGGGGGACATCAAGCAGCCATGCAAATGTTAAAAGAGACCATCAATGAGGAAGCTGCAGAATGGGATAGATTGCACCCAGTGCATGCAGGGCCTATTGCACCAGGCCAGATGAGAGAACCAAGGGGAAGTGACATAGCAGGAACTACTAGTACCCTTCAGGAACAGATAGGATGGATGACAAGTAATCCACCTACCCCAGTAGGAGAAATTTATAAAAGATGGATAATCTTAGGATTAAATAAAATAGTAAGGATGTACAGCCCTACCAGCATTCTGGACATAAGACAAGGACCAAAGGAACCCTTTAGAGACTATGTAGACCGGTTCTATAAAACTTTAAGAGCCGAACAAGCTTCACAGGATGTAAAAAATTGGATGACAGAAACCTTGTTGGTCCAGAATGCAAACCCAGATTGTAAGACCATTTTAAAAGCATTGGGACCAGGAGCTACACTAGAAGAAATGATGACAGCATGTCAGGGAGTGGGAGGACCCAGCCATAAAGCAAGAATTTTGGCTGAAGCAATGAGCCAAGTAACAAATACATCTGCCATGATGATGCAGAGAGGCAATTTTAGGAACCAAAGAAAAATTGTTAAGTGCTTCAATTGTGGCAAAGAAGGGCACATAGCCAGAAATTGCAGGGCCCCTAGGAAAAAGGGCTGTTGGAAATGTGGAAAGGAAGGACACCAAATGAAAGATTGCACTGAGAGACAGGCTAATTTTTTAGGGAAGATCTGGCCTTCCAACAAGGGAAGGCCAGGGAATTTTCTTCAGAGCAGACCAGAGCCAACAGCCCCACCGAGACCAGAGCCAACAGCCCCACCAGAGGAGAGCTTCAGGTTTGGGGAAGAAACAACAACCCCCTCTCAGAAGCAGGGGATGATAGACAAGGAACTGCATCCTTTAACTTCCCTCAGATCACTCTTTGGCAACGACCCCTTGTCACAATAAAGATAGGGGGACAACTAAAGGAAGCTCTATTAGATACAGGAGCAGATGATACAGTAGTAGAAGAAATGAATTTGCCAGGAAAATGGAAACCAAAAATGATAGGGGGAATTGGAGGTTTTATCAAAGTAAGACAGTATGAGCAGATACTTGTAGAAATCTGTGGACATAAAGCAATAGGTACAGTATTAGTAGGACCTACACCTGTCAACATAATTGGAAGAAATCTGTTGACTCAGATTGGTTGCACTTTAAATTTTCCCATTAGTCCTATTGAAACTGTACCAGTAAAATTAAAGCCAGGAATGGATGGCCCAAAGGTTAAACAATGGCCATTAACAGAAGAAAAAATAAAAGCGTTAATAGAAATTTGTACAGAAATGGAAAAGGAAGGAAAAATTTCAAAAATTGGACCTGAAAATCCATACAATACTCCAGTATTTGCCATAAAGAAAAAAGACAGTACTAAATGGAGAAAATTAGTAGATTTTAGAGAGCTTAATAAGAAAACCCAAGACTTCTGGGAAGTTCAATTAGGAATACCACATCCTGCAGGGTTAAAAAAGAAAAAATCAGTAACAGTACTGGATGTGGGTGATGCATATTTTTCAGTTCCCTTAGATCAAGACTTCAGGAAGTATACTGCATTCACCATACCTAGTATAAATAATGAGACACCAGGGATTAGATATCAGTACAATGTGCTTCCACAAGGATGGAAAGGGTCACCAGCAATATTCCAAAGTAGTATGACAAAAATCTTAGAGCCTTTTAGAAAACAAAATCCAGACTTGGTGATCTATCAATACATGGATGATTTATATGTAGGATCTGACTTAGAAATAGAGCAACATAGAACAAAAATAGAGGAGCTGAGACAACATCTGTTGAAGTGGGGGTTTACCACACCAGATAAAAAACATCAGAAAGAACCTCCATTCCTTTGGATGGGTTATGAGCTCCATCCTGATAAATGGACAGTACAGCCTATAGTGCTGCCAGAAAAAGACAGCTGGACTGTCAATGACATACAGAAGTTAGTGGGAAAATTGAATTGGGCAAGTCAGATTTACTCAGGAATTAAAGTAAAGCAACTATGTAGACTCCTTAGGGGAACCAAAGCACTAACAGAAGTAATACCACTAACATCAGAAGCAGAGCTAGAACTGGCAGAAAACAGGGAGATTCTAAAAGAACCAGTACATGGAGTGTATTATGACCCATCAAAAGACTTAATAGCAGAAATACAGAAGCAGGGGGACGGTCAGTGGACATATCAAATTTATCAAGAGCCATTTAAAAATCTAAGAACAGGAAAATATGCAAGAACAAGGGGAGCCCACACTAATGATGTAAAACAATTAACAGAGGCAGTGCAAAAAATAGCCAGGGAAAGCATAGTAATATGGGGAAAAACTCCTAAATTTAAACTACCCATACAGAAAGAATCATGGGAGTTATGGTGGACAGATTATTGGCAAGCCACCTGGATTCCTGAATGGGAATTTGTCAACACCCCTCCCTTAGTGAAATTATGGTACCAGTTAGAAAAAGAACCCATATTAGGAGCAGAAACTTTCTATGTAGATGGGGCAGCTAACAGAGAGACTAAAATAGGAAAAGCAGGATATGTTACTGACAAAGGAAGGCAAAAGGTTGTCTCCCTAACTGACACAACAAATCAGAAGACTGAGTTACAAGCAATTCATCTAGCTTTGCAGGATTCAGGATTAGAAGTAAACATAGTAACAGACTCACAATATGCATTAGGAATCATTCAAGCACAACCAGATAAAAGTGAATCAGAGTTAGTCAACCTAATAATAGAACAGTTAATAAAAAAGGAAAAGGTCTACCTGGCATGGGTACCAGCACACAAAGGAATTGGGGGAAATGAACAAGTAGATAAATTAGTCAGTTCTGGAATCAGAAAAGTACTATTTTTAGATGGAATAGATAAGGCCCAAGAAGAACATGAGAAGTATCACAGTAATTGGAGGGCAATGGCTAGTGATTTTAACCTGCCACCTGTGGTTGCAAAGGAAATAGTAGCCTGCTGTGATAAATGTCAACTAAAAGGAGAAGCCATACATGGACAAATAGACTGTAGTCCAGGAATATGGCAACTAGATTGTACACATTTAGAAGGAAAAATTATCCTGGTAGCAGTCCATGTAGCCAGTGGATATATAGAAGCAGAAGTTATTCCAGCAGAGACAGGGCAGGAAACAGCATACTTTCTCTTAAAGTTAGCAGGAAGATGGCCTGTAAAAACAATACATACAGACAATGGCAGCAATTTCACCAGTAACACAGTTAAGGCCGCCTGTTGGTGGGCGGGGATCAAGCAAGAATTTGGCGTACCCTACAATCCTCAAAGTCAAGGAGTGGTAGAATCTATGAATAAAGAATTAAAGAAAATTATAGGACAGGTAAGAGATCAGGCTGAACATCTTAAGACAGTAGTACAAATGGCAGTATTCATTCACAATTTTAAAAGAAAAGGGGGGATTGGGGGGTACAGTGCAGGGGAAAGAATAATAGACATAATAGCAACAGACATACAAACTAAAGAATTACAAAAACAAATTACAAAAATTCAAAATTTTCGGGTTTATTACAGGGACAGCAGAGATCCAATTTGGAAAGGACCAGCAAAGCTTCTCTGGAAAGGTGAAGGGGCAGTAGTAATACAAGATAATAGTGACATAAAAGTAGTGCCAAGAAGAAAAGCAAAGATCATTAGGGATTATGGAAAACAGATGGCAGGTGATGATTGTGTGGCAAGTAGACAGGATGAGGATTAGCACATGGAAAAGTTTAGTAAAATACCATATGCATGTCTCAAGGAAAGCTAAGAAATGGGTTTATAGACATCACTATGAACTCACTCATCCAAGAAAAGGTTCAGAAGTACACATCCCACTAGGGGATCAATTGGTAATAACAACATACTGGGGTCTGCATACAGGAGAAAGAGACTGGCATTTGGGTCAGGGAGCCTCCATAGAATGGAGGAAAGGGAAATATAGCACACAAGTAGACCCTGGCCTAGCAGACCAACTAATTCATGTGCATTACTTTGATTGTTTTTCAGAATCTGCTATAAGAAATGCCATATTAGGACGTATAGTTAGTCCTAGGTGTGAATATCAAGCAGGGCATAACAAGGTAGGATCCCTACAGTACTTGGCACTAACAGCATTAGTAAAACCAAAAAAGATAAAGCCACCTTTGCCTAGTGTTGCAAAACTGACAGAGGATAGATGGAACAAGCCCCAGAAGACCAAGGGCCACAGAGAGAGCCATTCAATGAATGGACACTAGAGCTTTTAGAGGAGCCTAAAACTGCTTGTACCTCTTGCTATTGCAAAAAGTGCTGCTTACATTGCCAAGTTTGTTTCATAAAAAAAGGCTTAGGCATCTCCTATGGCAGGAAGAAGCGGAGACAGCGACGAAGAACTACTCAAAGTAGTCAGACTCATCAAGCAGATCTACCAAAGCAGTAAGTAGTATATGTGTGCTACTACTTGTAAAGGTTGCATCACTACAGCTTTGCCTATTGTGGGTCTTCTGTGGTTCCATGCTGTTTTGGTTACTGTAGCTCTGTAGTATCATTTGAAGTCAGGTAATGTGATTCCTCCAGTTTTGTTCTTTTTGCTCACTACAGCAATAGTATCATTAGTAGTAGCAGCAATAATAGCAATAGTTGTATGGTCCATAGTCTTCATAGAATATAGGAAAATATTAAGACAAAGAAAAATAGACAGGCTAATTGACAGAATTGCAGAAAGAGCAGAAGACAGTGGCAATGAGAGTGATGGGGATCAAGAGGAATTGTCAGCACTTGTGGAGATGGGGCATGATGCTCCTTGGAATGTTAATGATTTGTAGTGCTACAGACAAATTGTGGGTCACAGTCTATTATGGAGTACCTGTGTGGAAAGAAGCAACCACCACTCTATTTTGTGCATCAGATGCTAAAGCATATGATGCAGAAGCACATAATGTTTGGGCCACACATGCTTGTGTACCCACAGACCCCAATCCACAAGAAGTAGTATTGACAAATGTGACAGAAAATTTTAACATGTGGAAAAATAACATGGTAGAACAAATGCAGGAAGATATAATCAGTTTATGGGATCAAAGCCTAAAGCCATGTGTAAAATTAACCCCACTCTGTGTTACTTTAAATTGCAGTGATGTTGTGAATACTAATAATACCAATAATAGTAGCGGGGAAGAAATAGGGAGAGGAGAAATAAAAAACTGCTCTTTCAATATAAGAGATAGGGGGCGAAAAGAATATGCAGTTTTTTATAAACTTGATGTAGTACAAATAGATAATAAGAATAATAGGAGTAGGAATAATGGGAGTGCCAGCTATAAATTGATAAGTTGTAACACCTCAGTCATTACACAAGCCTGCCCAAAGATATCCTTTGATCCAATTCCCATACATTATTGTACCCCGCCTGGTTTTGCGCTTCTAAAGTGTAACGATAAGAAATTCAATGGAACAGGACAATGTACAAATGTCAGCACAGTACAATGTACACATGGAATTAGGCCAGTAGTATCAACTCAGCTGCTGTTAAATGGCAGTCTAGCAGAAGAAGATGTAGTAATTAAATCTGAAAATTTCGCGAACAATGCTAAAACCATAATAGTACAATTGAATGAAACTGTAAAAATTACTTGTATAAGACCCAACAACAATACAAGAAGAAGTGTACATCTAGGACCAGGGAGGGGAGCAATTTATACAGGGGATATAATAGGAAAAATAAGACAAGCATATTGTAACCTTAGTGAAGCAGAGTGGGATAAGACTTTAAAACGGATAGTTACAAAATTAAGAGAGCAATTTAAGAATAAAACAATAGCCTTTAATCAATCCTCAGGAGGGGACCCAGAAATTGTAATGCACAGTTTTAATTGTGGAGGGGAATTTTTCTACTGTAATACAGCACAACTGTTTAATAGTACTTGGAATGCTACTGATACTTGGAATACTACTACAGGGTTAAATGATACTGGTAAAAATATCACACTCCCATGCAGAATAAAACAAATTATAAACATGTGGCAGACAGTAGGAAAAGCAATGTATGCCCCTCCCATCAGAGGACAAATTAGGTGTTCATCAAATATCACAGGGTTGTTATTAACAAGAGATGGAGGTAATAACAGCATAAACACAGAGATCTTCAGACCTGGAGGAGGAGATATGAGGGACAATTGGAGAAGTGAATTATATAAATATAAAGTAGTAAAAATTGAACCATTAGGAGTAGCACCCACCAAGGCAAAGAGAAGAGTGGTGCAGAGGGAAAAAAGAGCAGTAACACTAGGAGCTATGTTCCTTGGGTTCTTGGGAGCAGCAGGAAGCACTATGGGCGCAGCATCAATAACGCTGACGGCACAGGCCAGACAATTATTGTCTGGTATAGTGCAACAGCAGAACAATCTGCTGAGGGCTATTGAGGCGCAACAGCATATGTTGCAGCTCACAGTCTGGGGCATCAAGCAGCTCCAGGCGAGAGTCCTGGCTGTGGAAAGATACCTAAAGGATCAACAGCTCCTGGGGATTTGGGGTTGCTCTGGAAAACTCATCTGCACCACCGCTGTGCCTTGGAATGCTAGCTGGAGTAATAAATCTCTAGATGACATTTGGCATAACATGACCTGGATGCAATGGGAGAAAGAAATTAACAATTACACAGGCTTAATATATACCTTAATTGAAGAATCGCAAAACCAGCAAGAAAAGAATGAACAAGAATTATTAGAATTGGATAAATGGGCAAGTTTGTGGAATTGGTTTGACATATCAAATTGGCTGTGGTATATAAAAATATTCATAATAATAGTAGGAGGCTTGGTAGGTTTAAGAATAGTTTTTACTGTGCTTTCTATAATAAATAGGGTTAGGAAGGGATATTCACCATTATCGTTTCAGACCCACCTCCCAGCCCCGCGGGGACCCGACAGGCCCGGAGGAATCGAAGAAGAAGGTGGAGAAGGAAACAGCAACAGATCAGGAGGATTAGTGAATGGATTCTTAGCAATTATCTGGGTCGACCTGCGGAGCCTGTGCCTTTTTGTCTACCACCGCTTGAGAGACTTACTCTTGGCTGTAACGAGGATTGTGGAACTTCTGGGACGCAGGGGGTGGGAAGCGCTCAGATACTGGTGGAATCTCCTACAGTATTGGAGTCAGGAACTAAAGAATAGTGCTGTTAGCTTGCTTAATGCCACAGCCATAGCAGTAGCTGAGGGAACAGATAGGGTCTTAGAAGTATTACAAAGAGCTTACAGAGCTATTCTCCACATACCTAGAAGAATAAGACAGGGCTTGGAAAGGGCTTTGCTATAAGATGGGTGGCAAGTGGTCAAAACGTGGGTGGTCTGATGTAAGGGAAAGAATGAGAGCTGAGCCAGCAGCAGATGGGGTGGGAGCAGCATCTCGAGACCTGGAAAGACATGGAGCAATCACAAGTAGCAATACAGCAGCTAACAATGCTGCTTGTGCCTGGCTAGAAGCACAAGAAGGGGAAGAGGTGGGTTTTCCAGTCAGACCTCAGGTACCTTTAAGACCAATGACTCACAAAGCAGCTCATGATCTTAGCCACTTTTTAAAAGAAAAGGGGGGACTGGAAGGGTTAATTTACTCCCAAAAAAGACAAGAGATCCTTGATCTGTGGGTCTACCACACACAAGGATACTTCCCTGATTGGCAGAACTACACACCAGGGCCAGGGACTAGATATCCACTGACCTTTGGATGGTGCTTCAAGCTAGTACCAGTTGAGCCAGAGGAGGTAGAAAAGGCCAATGAAGGAGAGAACAACTGTTTATTGCACCCTATGAGCCAACATGGGATGGATGACCCGGAGAAAGAAGTGTTACAGTGGAAGTTTGACAGCAGCCTAGCCTTTCGACACGTAGCCCGAGAGCTGCATCCGGAGTTCTTCAAGGACTGCTGACACAGAGCTTTCTACAAGGGACTTTCCGCTGGGGACTTTCCAGGGGAGGCGTAACCTGGGCGGGACGGGGGAGTGGCGAGCCCTCAGATGCTGCATATAAGCAGCTGCTTTTGCCTGTACTGGGTCTCTCTGGTTAGACCAGATCTGAGCCTGGGAGCTCTCTGGCTAGCTAGGGAACCCACTGCT
>B.AU.x.C24_AF538304_G.ES.99.X138_AF450098
TGGAAGGGCTAATTTACTCCCAAAAGAGACAAGAGATCCTTGATCTGTGGATCTACCACACAGAAGGCTACTTCCCTGACTGGCAGAACTACACACCAGGGCCAGGGGTCAGATATCCACTGACCTTTGGATGGTGCTTCAAGCTAGTACCAGTTGAGCCAGAGAAGATAGAAGAGGCCAATGAAGGAGAGAACAACAGCTTGTTACACCCTATGAGCCTGCATGGAATGGAGGACCCGGAGAAAGAAGTGTTAGTGTGGAGGTTTGACAGCCGCCTAGCATTTCATCACATGGCCAAAGAGCTGCATCCGGAGTACTACAAGAACTGCTGACATTGAGCTTTCTACAAGGGACTTTCCGCTGGGGACTTTCCAGGGGAGGCGTGGACTGGGCGGGACTAGGGAGTGGCGAGCCCTCAGATGCTGCATATAAGCAGCTGCTTTTTGCCTGTACTGGGTCTCTCTGGTTAGACCAGATCTGAGCCTGGGAGCTCTCTGGCTAGCTAGGGAACCCACTGCTTAAGCCTCAATAAAGCTTGCCTTGAGTGCTTCAAGTAGTGTGTGCCCGTCTGTTGTGTGACTCTGGTAACTAGAGATCCCTCAGACCCTTTTAGTCAGTGTGGAGAATCTCTAGCAGTGGCGCCCGAACAGGGACTTGAAAGCGAAAGAGAAACCAGAGGAGCTCTCTCGACGCAGGACTCGGCTTGCTGAAACGCGCGCGGCAAGAGGCGAGGGGCGGCGACCGGTGAGTACGCCAAATATTTTGACTAGCGGAGGCTATAAGGAGAGAGATGGGTGCGAGAGCGTCAGTATTAAGCGGGGGAGAATTAGACAAATGGGAAAAAATTCGGTTAAGGCCAGGGGGAAAGAAAAAATATAAGTTAAAACATTTAGTATGGGCAAGCAGGGAGCTGGAAAGATTTGCACTCAACCCTGACCTTTTAGAAACAGCAGAAGGTTGTCAGCAAATAMTGGGACAGTTGCAACCAGCTCTCCAGACAGGAACAGAGGAGCTTAGATCATTATTTAATGCAGTAGCAACCCTCTATTGTGTACATCAAAAGATAGAGATAAAAGACACCAAGGAAGCTTTAGAAAAGATAGAGGAAGAGCAAAACAAAAGTAAGAAAAAGGCACAGCAAGCAGCAGCTGACACAGGAAACAGCAGCCAGGTCAGCCAAAATTACCCTATAGTGCAGAACCTTCAGGGGCAAATGGTACATCAGGCCCTATCACCTAGGACCTTAAATGCATGGGTAAAAGTAATAGAGGAGAAGGCTTTCAGTCCAGAGGTAATACCCATGTTTTCAGCATTATCAGAAGGAGCCACCCCACAAGATTTAAACACCTTGCTAAACACAGTGGGGGGACATCAAGCAGCCATGCAAATGTTAAAAGAGACCATCAATGAGGAAGCTGCAGAGTGGGATAGATTGCATCCAGTGCAGGCAGGGCCTGTTGCACCAGGCCAGATAAGAGAACCAAGGGGAAGTGACATAGCAGGAACTACTAGTAACCTTCAGGAACAAATAGCATGGATGACACATAATCCACCTATCCCAGTAGGAGAAATTTATAAAAGATGGATAATCCTGGGATTAAATAAGATAGTAAGGATGTATAGTCCTGTCAGCATTCTGGACATAAGACAAGGACCAAAGGAACCCTTTAGAGACTATGTAGACCGGTTCTATAAAACTCTAAGAGCCGAGCAAGCTTCACAGGAAGTAAAAAATTGGATGACAGAAACCTTGTTGGTCCAAAATGCAAACCCAGATTGTAAAACTATTTTAAAAGCATTAGGACCAGCAGCTACACTAGAAGAAATGATGACAGCATGTCAGGGAGTGGGAGGGCCCGGCCATAAAGCAAGAGTTTTGGCTGAGGCAATGAGCCAAGTAACAAATCCAGCTACCATAATGATGCAGAAAGGCAATTTTAGGAACCAAAGAAAGAGGGTTAAGTGTTTCAATTGTGGCAAAGAAGGGCACATAGCTAGAAATTGCAGGGCCCCTAGGAAAAAGGGCTGTTGGAAATGTGGAAAGGAAGGACACCAAATGAAAGATTGTACTGAGAGACAGGCTAATTTTTTAGGGAAAATCTGGCCTTCCCACAAGGGGAGGCCAGGGAATTTTCTTCAGAGCAGACCAGGGGAGAGCAGACCAGAGCCAACAGCCCCACCAGAAGAGAGCTTCAGGTTTGGGGAGGAGACAACAACTTCCTCTCAGAAGCAGGAGCCGATAGACAAGGAACTGTATCCTTTAGCTTCCCTCAGATCACTCTTTGGCAACGACCCCTCGTTACAATAAAGATAGGGGGGCAACTAAAGGAAGCTCTATTAGATACAGGAGCAGATGATACAGTATTAGAAGAAATGAATTTGCCAGGAAGATGGAAACCAAAAATGATAGGGGGAATTGGAGGTTTTATCAAAGTAAGACAGTATGATCAGATACTCATAGAAATCTGTGGACATAAAGCTATAGGTACAGTGTTAGTAGGACCTACACCTGTCAACATAATTGGAAGAAATCTGTTGACTCAGATTGGTTGCACCTTAAATTTTCCCATTAGTCCTATTGAAACTGTACCAGTAAAATTAAAGCCAGGAATGGATGGCCCAAAAGTTAAACAATGGCCATTGACAGAAGAAAAAATAAAAGCATTAGTAGAAATCTGTACAGAAATGGAAAAGGAAGGAGAAATTTCAAAAATTGGGCCTGAAAATCCATACAATACTCCAGTATTTGCCATAAAGAAGAAAAACAGTACTAGATGGAGAAAATTAGTAGATTTCAGAGAACTTAATAAGAGAACTCAAGACTTCTGGGAAGTTCAATTAGGAATACCACATCCCGCAGGGTTAAAAAAGAAAAAATCAGTAACAGTACTGGATGTGGGTGATGCATATTTCTCAGTTCCATTAGATAAAGACTTCAGGAAGTATACTGCATTTACCATACCTAGTATAAACAATGAGACACCAGGGGTTAGATATCAGTACAATGTGCTTCCACAGGGATGGAAAGGCTCACCAGCAATATTCCAAAGTAGCATGACAAAAATCTTAGAGCCTTTTAGAAAACAAAATCCAGACTTAGTYATCTATCAATACGTGGATGATTTGTATGTAGGATCTGACTTAGAAATAGGACAGCATAGAACAAAAATAGAGGAACTGAGACAACATCTGTTGAAGTGGGGGTTTACCACACCAGACCAAAAACATCAGAAAGAACCTCCATTCCTTTGGATGGGTTATGAACTCCATCCTGATAAATGGACAGTACAGCCTATAAAGCTGCCAGAAAAGAAAAGCTGGACTGTCAATGACATACAGAAGTTAGTGGGAAAATTGAATTGGGCAAGTCAAATTTACCCAGGGATTAAAGTAAAGCACTTATGTAAACTCCTTAGGGGAGCCAAAGCACTAACAGAAGTAGTACCACTAACAGAAGAAGCAGAGCTAGAACTGGCAGAAAACAGGGAGATTCTAAAAGAGCCAGTACATGGAGTATATTATGACCCATCAAAAGACTTAATAGCAGAAATACAGAAGCAGGGGAACGGCCAATGGACATATCAAATATATCAAGAGCCATTTAAAAATCTGAAAACAGGAAAGTATGCAAAAATGAGGGGTGCCCACACTAATGATGTAAAACAATTAACAGAGGCAGTGCAAAAAATAGCCACAGAAAGCATAGTAATATGGGGAAAGACCCCTAAATTTAAACTACCCATACAAAAAGAAACATGGGAAACATGGTGGACAGAGTATTGGCAAGCCACATGGATTCCTGAGTGGGAGTTTGTCAACACCCCTCCCTTAGTAAAATTATGGTACCAGTTAGAGAAAGAACCCATAGTAGGAGCAGAAACTTTCTATGTAGATGGGGCAGCTAAGAGGGAGACTAGATTAGGAAAAGCAGGATATGTTACTGACAAAGGAAGACAAAAAGTTGTCTCCATAACTGACACAACAAATCAGAAGACTGAGTTACAAGCAATTCATCTAGCTTTGCAGGATTCGGGATCAGAAGTAAACATAGTAACAGACTCACAATATGCATTAGGAATCATTCAAGCACAACCAGATAAAAGTGAATCAGAGTTAGTCAGTCAAATAATAGAGCAGTTAATAAAAAAGGAAAAGGTCTACCTAGCATGGGTACCTGCACACAAAGGAATTGGAGGAAATGAACAAGTAGATAAATTAGTCAGTGCTGGAATCAGGAAAGTACTATTTTTAGATGGAATAGATAAGGCCCAAGAAGAACATGAGAAGTATCACAGTAATTGGAGAGCAATGGCTAGTGATTTTAACCTGCCGCCTATAGTAGCAAAAGAAATAGTAGCCAGCTGTGATAAATGTCAACTAAAAGGGGAAGCCATGCATGGACAAGTAGACTGTAGTCCAGGAATATGGCAACTAGATTGTACACATTTAGAAGGAAAAGTTATCCTGGTAGCAGTTCATGTAGCCAGTGGATATATAGAAGCAGAAGTTATCCCAGCAGAGACAGGGCAGGAAACAGCATACTTCATCTTAAAATTAGCAGGAAGATGGCCAGTAAAAATAATACATACAGACAATGGCGGCAATTTCATCAGTGCTATGGTCAAGGCCGCCTGTTGGTGGGCGGGGATCAAGCAGGAATTTGGTATTCCCTACAATCCCCAAAGTCAAGGAGTAGTAGAATCTATGAATAAAGAATTAAAGAAAATTATAGGACAGGTAAGAGATCAGGCTGAACATCTTAAGACAGCAGTACAAATGGCAGTATTCATCCACAATTTTAAAAGAAAAGGGGGGATTGGGGAGTACAGTGCAGGGGAAAGAATAATAGACATAATAGCAACAGACATACAAACTAAAGAATTACAAAAACAAATTACAAAAATTCAAAATTTTCGGGTTTATTACAGGGACAGCAGAGATCCAGTTTGGAAAGGACCAGCAAAGCTTCTCTGGAAAGGTGAAGGGGCAGTAGTAATACAGGATAATAGTGACATAAAAGTAGTGCCAAGAAGAAAAGCAAAGATCATCTGGGATTATGGAAAACAAATGGCAGGTAATGATTGTGTGGCAAGTAGACAGGATGAGGATTAAAACATGGAACAGTTTAGTAAAACATCATATGTATATTTCAAGGAAAACTAAGGAATGGTCTTATAGACATCACTATGAAAGCACTAATCCAAGAATAAGTTCAGAAGTACACATCCCACTAGGGGATGCTAGATTGATAGTAACAACATATTGGGGTCTGCATGTAGGAGAAAGAGACTGGCATTTGGGTAATGGAGTCTCCATAGAATGGAGGAAAAAGAGCTATGGCACACAAGTAGACCCCGACTTAGCAGACCAACTAATTCATCTGTATTACTTTGATTGTTTTTCAGAATCTGCTATAAGAAATGCCATATTAGGACGTATAGTTAGTCCTAGTTGTGAATATCAAGCAGGACATAACAAGGTAGGATCTCTACAGTACTTGGCACTAACAGCATTAATAGCGCCAAAAAAGATAAAGCCACCTTTGCCTAGCATTAAGAAACTGACAGAGGATAGATGGAACAAGCCCCAGAAGACCAAGGGCCACAGAGGGAGCCATACAATGAATGGACACTAGAACTTTTAGAGGAGCTTAAGCATGAAGCTGTTAGACATTTTCCTAGGCCATGGCTCCATAGCTTAGGGCAACATATCTATGAAACTTATGGGGATACTTGGGCAGGAGTGGAAGCCATAATAAGAATTCTACAACAACTACTGTTTATTCATTTCAGAATTGGGTGTCAACATAGCAGAATAGGCATCCAACGAAGGAGAACAAGAAATGGAGCCAATAGATCCTAGACTAGAGCCCTGGAAGCATCCAGGAAGTCAGCCTAGGACTGCTTGTACTACTTGCTATTGTAAAAAGTGTTGCTTTCATTGCCAAGTTTGTTTCATGACAAAAGGCTTAGGCATCTCCTATGGCAGGAAGAAGCGGAGACAGCGACGAAGAGCTCCTCAAGACGGTCAGACTAATCAAGTTTCTTTATCAAAGCAGTAAGTAGTGCATGTAATGCAACCTATAATTGGAGCAATAGTAGCATTAGTAGTAGCAATAATATTAGCAATAGTTGTGTGGACCATAGTATTCATAGAATATAGGAAAATATTAAGACAAAGGAAAATAGACAGGATAATTGATAGAATAATAGAAAGAGCAGAGGACAGTGGCAATGAGAGTGAAGGGGATCAGGAAGAATTGTCAACGCTTGTGGAGATGGGGCATCATGCTCCTTGGGATGTTGATGATCTGTAGTGCTACAGAAAAGTTATGGGTCACAGTCTATTATGGGGTACCTGTGTGGAAAGAAGCAACTACCACTCTATTTTGTGCATCAGATGCTAAAGGATATGAGACAGAGGCACATAATGTTTGGGCCACACATGCCTGTGTACCCACAGACCCCAACCCACAAGAAATAGTATTGGAAAATGTGACAGAAAACTTTAACATGTGGAAAAATAACATGGTAGAACAAATGCATGAGGATATAATCAGTTTATGGGATCAAAGCCTAAAGCCATGTGTAAAATTAACCCCACTCTGTGTTACTTTAAATTGCACTGATGCTAATACCACTAGTAGTACTAATACCACTAATGGTACTAATCCCACTATTAGTGGCAGCAGAATGGAAAAAGGAGAAATAAAAAACTGCTCTTTCAACGTCACCACAAACATGAGAGATAAGATGCAGAGAGCTTTTGCACTTTTTTATAAACTTGATGTAGTACCAATAGATAAGAATAATGATAACAATAATACCAGCTATAGGTTGATAAGTTGTAATACCTCAGTCATTACCCAAGCCTGTCCAAAAGTATCCTTTGAGCCAATTCCCATACATTATTGTGCCCCGGCTGGTTTTGCGATTCTAAAATGTAATGATAAGAAGTTCAATGGAACAGGACCATGTACAAATGTCAGCACAGTACAATGTACACATGGAATTAGGCCAGTAATATCAACTCAACTACTGTTAAATGGCAGCCTAGCAGAAGAGGTGGTAGTAATTAGATCTAGCAATTTCACAGACAATATTAAAAACATAATAGTACAGCTGAACGAACCTGTAGAAATTAATTGTACAAGACCCAATAATAATACAAGAAAAAGTATACATATAGCACCAGGGAGAGCATTTTATGCAACAGGAGAAATAATAGGAGATATAAGACAAGCATATTGCAACATTAGTAGAGAAAAATGGAATAACACTTTAAAACAGATAGTTGAAAAATTAAGAGAACAATATGTGAATAAAACAATAGTCTTTAATCAATCCTCAGGAGGGGACCCAGAAATTGTAATGCACAGTTTTAATTGTGGAGGGGAATTTTTCTACTGTAATACAACACAACTGTTTAATAGTACTTGGAATGTTACTGAAAGGTTAAATAACACTGAAAGAGATAATACTACAATCACACTCCCATGCAGAATAAAACAACTTATAAACATGTGGCAGGAGGTAGGAAAAGCAATGTATGCCCCTCCCATTAGCGGACGAATTAGATGTTCATCAAATATTACAGGGCTGATATTAACAAGAGATAGTGGTAGCGGGAACGGGACCGAGACCTTCAGACCTGGAGGAGGAAATATGAAGGACAATTGGAGAAGTGAATTATATAAATATAAAGTAGTAAGAATTGAACCATTAGGAGTAGCACCCACCAAGGCAAAGAGAAGAGTGGTGCAGAGAGAAAAAAGAGCATTAGGGGGACTAGGAGCTATGTTCCTTGGGTTCTTGGGAGCAGCAGGAAGCACTATGGGCGCAGCGTCAATGGCGCTGACGGTACAGGCCAGACAATTATTGTCTGGTATAGTGCAACAGCAGAACAATCTGCTGAGAGCTATTGAGGCGCAACAGCATCTGTTGCAACTCACAGTCTGGGGCATTAAGCAGCTCCAGGCAAGAGTCCTGGCTGTGGAGAGATACCTAAAGGATCAACAGCTCCTGGGGATTTGGGGTTGCTCTGGAAAACTCATCTGCACCACTGCTGTGCCTTGGAATTCTAGTTGGAGTAATAAATCTCTGGATAAGATTTGGGATAACATGACCTGGATGGAGTGGGAAAGAGAAATTGACAATTACACAGGCTTAATATACACCTTAATTGAACAATCACAAATCCAGCAAGAAAAGAATGAACAAGAATTATTGGAATTGGATCAATGGGCAAGTTTGTGGAATTGGTTTGACATAACAAAATGGCTGTGGTATATAAAAATATTCATAATGATAGTAGGAGGCTTGGTAGGTTTAAAAATAGTTTTTTCTGTGCTTTCTATAGTGAATAGAGTTAGGCAGGGATACTCACCATTGTCATTTCAGACCCGCCTCCCAGCCCAGAGGGGACCCGACAGGCCCGAAGGAATCGAAGAAGAAGGTGGAGAGAGAGACAGAGACAGATCCGAGTGCTTAGTGAACGGATCCTTAGCACTTGTCTGGGACGATCTCCGGAGCCTGCGCCTTTTCAGCTACCACCGCTTGAGAGACTTACTCTTGATTGTAACGAGGATTGTGGAACTTCTGGGACGCAGGGGGTGGGAAGCCCTCAAATACTGGTGGAATCTCCTACAGTATTGGAGCCAGGAACTAAAGAATAGTGCTATTAGCTTGCTTAATGCTACAGCCATAGCAGTAGCTGAGGGGACAGATAGGGTTATAGAAGTATTGCAAAGAGCTTATAGAGCTATTATCCACATACCTAGAACAATAAGACAGGGCTTGGAAAGGGCTTTGCAATAAGATGGGTGGCAAGTGGTCAAAACTTAGTAGGGGTGGTGGGTGGCATGCTGTAAGGGAAAGAATGAGACGAGCTGCACCAGCGGCGCCAGCAGCAGAGGGGGTGGGAGCAGTATCTCGAGACCTGGAGAAACATGGAGCAATCACAAGTAGCAATACAGCAGCTACCAATGCTGATTGTGCCTGGCTAGAAGCACAAGAGGAGGAGGAGGTGGGTTTTCCAGTCAGACCTCAGGTACCTTTAAGACCAATGACTTACAAAGCAGCTTTAGATCTTAGCCACTTTTTAAAAGAAAAGGGGGGACTGGAAGGGCTAATTTACTCCCAAAAGAGACAAGAGATCCTTGATCTGTGGATCTACCACACAGAAGGCTACTTCCCTGACTGGCAGAACTACACACCAGGGCCAGGGGTCAGATATCCACTGACCTTTGGATGGTGCTTCAAGCTAGTACCAGTTGAGCCAGAGAAGATAGAAGAGGCCAATGAAGGAGAGAACAACAGCTTGTTACACCCTATGAGCCTGCATGGAATGGAGGACCCGGAGAAAGAAGTGTTAGTGTGGAGGTTTGACAGCCGCCTAGCATTTCATCACATGGCCAAAGAGCTGCATCCGGAGTACTACAAGAACTGCTGA
>B.CN.x.CNHN24_AY180905_H.CF.90.056_AF005496
GATTAATCTCTAGCAGTGGCGGCCGAACAGGGACTAGAAAGCGAAAGTGAGACCAGAGGAGCTCTCTCGACGCAGGACTCGGCTTGCTGAAGCGCGCACAGCAAGAGGCGAGAGCGGCGACTGGTGAGTACGCCAAATTTTTTGACTAGCGGAGGCTAGAAGGAGAGAGATGGGTGCGAGAGCGTCGGTATTAAGCGGGGGACAATTAGATAGATGGGAAAAAATTCGGTTAAGGCCAGGGGGAAAGAAAAAATATAGATTAAAACATTTAGTATGGGCAAGCAGGGAGCTAGAACGATTCGCAGTTAATCCTGGCCTGTTAGAAACAGCAGAAGGCTGTAGACAAATACTGGAACAGCTACAACCAAGCCTTCAGACAGGATCAGAAGAACTTAGATCCTTATTCAATACAGTAGCAACCCTCTATTGTGTGCATCAAAGGATAGAGATAAAAGACACCAAGGAAGCTTTAGAAAAGATAGAGGAAGAGCAAAACAAAAGTAAGAAAAAGACACAGCAAACAGCAGCTGACACAGGAAACAGCAGCCAGGTCAGCCAAAATTACCCTATAGTGAGAAACCTCCAGGGGCAAATGGTACATCAGCCCATATCACCTAGAACTTTAAATGCATGGGTAAAAGTAGTAGAAGAGAAGGCTTTTAGTCCAGAAGTAATACCCATGTTTTCAGCATTATCAGAAGGAGCCACCCCACAAGATTTAAACACCATGCTAAACACAGTGGGGGGACATCAAGCAGCCATGCAAATGTTAAAAGACACCATCAATGAGGAGGCTGCAGAATGGGATAGATTGCATCCAGCGCAGGCAGGGCCAATTGCACCAGGCCAGATAAGAGAACCAAGGGGAAGTGACATAGCAGGAACTACTAGTAATCTTCAGGAGCAAATAGCATGGATGACAAATAATCCACCTATCCCAGTAGGAGAAATCTATAAAAGATGGATAATCCTGGGATTAAATAAAATAGTAAGAATGTATAGCCCTACCAGCATTCTGGACATAAAACAAGGACCAAAGGAACCCTTTAGAGATTATGTAGATCGGTTCTATAAAACTCTAAGAGCCGAGCAAGCTTCACAAGATGTAAAAAATTGGATGACAGAAACCTTGTTGGTCCAAAATGCGAACCCAGATTGTAAAACTATTTTAAAAGCATTGGGACCAGCAGCTACACTAGAAGAAATGATGACAGCATGTCAGGGAGTGGGGGGACCCGGCCATAAAGCAAGAGTTTTGGCTGAAGCAATGAGCCAAGTAACAAATTCAACTAGTATAATGATGCAGAGAGGCAATTTTAGGAACCAAAGAAAGACTGTCAAGTGTTTCAATTGTGGCAAAGAAGGGCACATAGCCAAAAATTGCAGGGCCCCTAGGAAAAAGGGCTGTTGGAAATGTGGAAGGGAAGGACACCAGATGAAGGATTGTACTGAGAGACAGGCTAATTTTTTAGGGAAAATCTGGCCTTCCCACAAGGGGAGGCCAGGGAACTTTCTTCAGAGCAGACCAGAGCCAACAGCCCCACCAGAGGAGAGCTTCAGGTTTGGGGAAGAGACAACAGCTCCATCTCAGAAGCAGGAGCCGATAGACAAGGAACTATATCCTTTAGCCTCCCTCAAATCACTCTTTGGCAACGACCCCTCGTCACAATAAAGATAGGGGGACAATTAAAGGAAGCTCTATTAGATACAGGAGCAGATGATACAGTATTAGAAGACATGAATTTGCCAGGAAGATGGAAACCAAAAATGATAGGGGGAATTGGAGGTTTTATCAAAGTAAGACAGTATGATCAGATACCCATAGAAATCTGCGGACACAAGGTAGAAGGTACAGTATTAATAGGACCTACACCTGTCAACATAATTGGGAGAAATCTGTTGACTCAGCTTGGTTGCACTTTAAATTTTCCCATTAGTCCTATTGATACTGTACCAGTAAAATTAAAGCCAGGAATGGATGGCCCAAAAGTTAAACAATGGCCATTGACAGAAGAAAAAATAAAAGCATTAGTAGAAATTTGTACAGAAATGGAAAAGGAAGGGAAAATTTCAAAAATAGGGCCTGAAAATCCATACAATACTCCAGTATTTGCCATAAAGAAAAAAGACAGTACTAAATGGAGAAAATTAGTAGATTTCAGGGAACTTAATAAAAGAACTCAAGACTTTTGGGAAGTTCAATTAGGAATACCACATCCCGCAGGATTAAAAAAGAAAAAATCTGTAACAGTCCTGGATGTGGGTGATGCATATTTCTCAGTCCCTTTAGATAAAGACTTCAGGAAGTATACTGCATTTACCATACCTAGTATAAACAATGAGACACCAGGGATCAGATATCAGTACAATGTGCTTCCACAGGGATGGAAAGGATCACCAGCAATATTCCAATGTAGCATGACAAAAATTTTAGAGCCTTTTAGAAAACAAAACCCAGACATAGTTATCTATCAATACATGGATGATTTGTATGTAGGATCTGATTTAGAAATAGGGCAGCATAGAACAAAAATAGAGGAACTGAGACAACACCTGTTGAGGTGGGGGTTTACCACACCAGACAAAAAACATCAGAAAGAACCTCCATTCCTTTGGATGGGTTATGAACTCCATCCTGATAAATGGACAGTACAGCCTATAGAGCTGCCAGAAAAGGACAGCTGGACTGTCAATGACATACAGAAGTTAGTGGGAAAGTTGAATTGGGCAAGTCAGATTTATGCAGGGATTAAGGTAAGGGAATTATGTAAACTCCTTAGGGGAACCAAAGCACTAACAGAAGTAGTACCACTAACAGAAGAAGCAGAGCTAGAACTGGCGGAAAACAGGGAAATTCTGAAAGAACCAGTACATGGAGTGTATTATGACCCATCAAAAGACTTAATAGCAGAAATACAGAAGCAGGGGCTAGGCCAATGGACATACCAAATTTATCAAGAGCCATATAAAAATCTGAAAACAGGAAAGTATGCCAGAATGAGGGGTGCCCACACTAATGATGTAAAACAATTAACAGAGGCAGTGCAAAAAGTAGCCACAGAAAGCATAGTAATATGGGGGAAGACTCCTAAATTTAAACTACCCATACAAAAGGAAACATGGGAAGCATGGTGGACAGAGTATTGGCAAGCCACCTGGATTCCTGAGTGGGAGTTTACCAATACCCCTCCCTTAGTGAAATTATGGTATCAGTTAGAGAAAGAACCCATAGAAGGAGCAGAAACTTTCTATGTAGATGGGGCAGCTAGTAGGGAGACTAAATTAGGAAAAGCAGGATATGTTACTAACAAAGGAAGACAAAAAGTTGTCACCCTAACTGACACAACAAATCAGAAGACTGAGTTACAAGCAATTCATTTAGCTTTGCAGGATTCAGGAGCAGAAGTAAACATAGTAACAGACTCACAATATGCATTAGGAATCATTCAAGCACAACCAGATAAGAGTGAATCAGAATTAGTCAGTCAAATAATAGAGCAGTTAATAAAAAAGGAAAAAGTCTACCTGGCATGGGTGCCAGCACACAAGGGAATTGGAGGGAATGAACAAATAGATAAATTAGTCAGTGCTGGAATCAGGAAAGTACTATTTTTAGATGGAATAGATAAGGCCCAAGAAGAACATGAGAAATATCACAATAACTGGAGAGCAATGGCTAGTGATTTTAACCTACCACCTGTGGTAGCAAAAGAAATAGTAGCCAGTTGTGATAAATGTCAGCTAAAAGGAGAAGCCATGCATGGACAAGTAGACTGTAGCCCAGGAATATGGCAACTAGATTGTACACATATAGAAGGACAAATTATCCTGGTAGCAGTTCATGTAGCCAGTGGATATATAGAAGCAGAAATTATTCCAACAGAGACAGGGCAGGAAACAGCATACTTTATCCTAAAATTAGCAGGAAGATGGCCAGTGAAAACAATACATACAGACAATGGCAGAAATTTTACCAGTAATGCGGTTAAGGCCGCCTGTTGGTGGGCGGGAATCAAGCAGGAATTTGGCATTCCCTACAATCCCCAAAGTCAAGGAGTAGTAGAATCTATGAATAATGAATTAAAGAAAATTGTAGGACAGGTAAGAGATCAAGCTGAACATCTTAAGACAGCAGTACAAATGGCAGTATTCATCCACAATTTTAAAAGAAAAGGGGGGATTGGGGGGTACAGTGCAGGGGAAAGAATAGTAGACATAATAGCAACAGACATACAAACTAGAGAATTACAAAAACAAATTACAAAAATTCAAAATTTTCGGGTTTATTACAGGGACAGCAGAGACCCACTTTGGAAAGGACCAGCAAAGCTCCTTTGGAAAGGTGAAGGGGCAGTAGTAATACAAGATAATAGTGACATAAAAGTAGTGCCAAGAAGAAAAGCAAAGATCATTAGGGACTATGGAAAACAGATGGCAGGCGATGATTGTGTGGCAAGTAGACAGGATGAGGATTAGAACATGGAAAAGTTTAGTAAAACACCATGTGCATATTTCAAGGAAAGCTAAGGGGTGGTGTTATAAACATCACTATGATAGCACTCATCCAAAAATAAGTTCGGAAGTACACATCCCACTAGGGGATGCTAAATTGGTAATAACAACATATTGGGGTCTGCATACAGGAGAAAGAGACTGGCATCTGGGCCAGGGAGTCTCCATAGAATGGAGGAGAGAGAGATATAGCACACAAGTAGAACCTGGCCTAGCAGACCAACTAATTCATCTGTATTATTTTGATTGTTTTTCAGAATCTGCTATAAGAAATGCCATTTTAGGACGTGTAGTTAGCCATAGTTGTGATTATCTAGCAGGACATAACAAGGTAGGATCCCTACAGTACTTGGCACTAGCAGCATTAGTAACACCAAAAAGGAGAAAGCCACCTTTGCCTAGTGTTGCAAAACTGACAGAGGATAGATGGAACAAGCCCCAGAGGACCAAGGGCCACAGAGGGAACCATACAATGAGTGGACACTAGAGCTGTTAGAGGAGCTTAAGGGGGAAGCTGTTAGACATTTTCCTAGGAGTTGGCTCCATGAGTTGGGACAACATATCTATGTAACATATGGAGATACTTGGGCAGGAGTGGAAGCCTTAATAAGAATTCTGCAACAACTGCTGTTTATTCATTTCAGAATTGGGTGTCAACATAGCAGAATAGGCATTATTCGACAGAGGAGAGCAAGAAATGGAGCCAGTAGATCCTAGATTAGAGCCCTGGAAGCATCCAGGAAGTCGGCCTAAGACTGCTTGTACTAATTGCTTTTGTAAAAAGTGCTGCTATCATTGCCAAGATTGTTTCCTGAAAAAAGGCTTAGGCATCTCCTATGGCAGGAAGAAGAGAAGACAGCGACGAAGAGCTCCTCAAGACAGTCAGACTCATCAAGCGTCTCTATCAAAGCAGTAAGTAGTGAATGTAATGCAAACCTTAACCATTTTAGCAATAGTAGCCTTAGTAGTAGCAGCAATAATAGCAATAGTTGTGTGGACCATAGTATTCATAGAATATAAGAAACTATTAAGACAGAAAAGAATAGATAGGTTAATTGATAGAATAAGAGAAAGAGCAGAAGACAGTGGCAATGAGAGTGACGGGGATCAGGAAGAATTATCAGAAATTATGGAGATGGGGCACCTTGCTCCTTGGGATGTTGATGATCTGTAGTGCTGCAGAAAAATTGTGGGTCACAGTCTATTATGGGGTACCTGTATGGAAAGATGCAACTACCATTCTATTTTGTGCATCAGATGCTAAAGCATATAAGTCAGAGGTACATAATATTTGGGCCACACATGCCTGTGTACCCACAGACCCCAACCCACAAGAAGTAGTCTTGGGAAATGTGACAGAAAACTTTAACATGTGGAAAAATGACATGGTAGAACAGATGCATGAAGATATAATCAGTTTATGGGATCAAAGCCTAAAGCCATGTGTAAAATTAACCCCACTCTGTGTTACTTTAGATTGCACTAATTTGAATATTACTAATATCAGTAGTAATACCACCAATACTACTACTACCAGTAGTAATACCAGTAGTACAACAGGGATAGGGTTAGAAATGAAAAACTGCTCTTTCAATATCACCACAAGCATAAATACTAAGGTAAAAGACTATGCACTTTTTTATAAACCTGATATAGTACCAGTTAATAATACTAATAATACCAGATATAGGTTGATAAATTGTAACACCTCAGTCATTACACAAGCTTGTCCAAAGGTATCCTTTGAGCCAATTCCCATACATTATTGTGCCCCGGCTGGTTTTGCGATTCTAAAGTGTAACAATAAAACGTTCAATGGAACAGGACCATGTACAAATATCAGTACAGTACAATGTACACATGGAATCAGGCCAGTAGTATCAACTCAACTGCTGTTAAATGGCAGTTTAGCAGAAGAAGAGGTAATGATTAGATCTAGCAATTTCTCGAACAATGCTAAAATCATAATAGTACAGTTGAATGAATCTGTAGAAATTAATTGTACAAGACCCAGCAACAATACAAGAAAAAGAGTAACTCTAGGACCAGGGCGAGTATGGTATACAACAGGACAAATAATAGGAGATATAAGACGAGCACATTGTAACCTTAGTAGAACACAATGGGATAAAACTTTACAACAGATAACTAAAAAATTAAGAGAACAATTTGGGAACAAAACAATAGTCTTTAATCACTCCTCAGGAGGGGACCCAGAGATTGTAATGCACAGTTTTAATTGTGGAGGGGAATTTTTCTACTGTAATACATCACGACTGTTTAATAGTACTTGGAATAGTACTAGGAATAATATAGGAAATGGCACTATCACGCTCCCTTGCAGAATAAAACAAATTATAAACATGTGGCAGGAAGTAGGGAAAGCAATGTATGCCCCTCCCATTGCAGGAAATATTAGCTGTTCATCAAATATTACAGGGTTGTTATTAACAAGAGATGGTGGTAACGCGTCTGCAGAAAATTATACCTTCAGACCTGGAGGAGGAGATATGAGGGACAATTGGAGAAGTGAATTGTATAAATATAAAGTAGTAAAAATTGAACCACTGGGAATAGCACCCACCAAGACAAGGAGAAGAGTGGTGGAGAGAGAAAGAAGAGCAGTGGGAGCGATAGGAGCTATGTTCCTTGGGTTCTTGGGAGCAGCAGGAAGCACTATGGGCGCAGCGTCAATAACGCTGACGGTACAGACCAGACAATTGTTGTCTGGTATAGTGCAACAGCAGAGAAATCTGCTGAGGGCTATTGAGGCGCAACAGCATCTGTTGCAACTCACAGTCTGGGGCATCAAGCAGCTCCAGGCAAGAGTCCTGGCTGTGGAAAGATACCTAAAGGATCAACAGCTCCTAGGGATTTGGGGTTGCTCTGGAAAACTCATTTGCCCCACTGCTGTGCCTTGGAATGCTAGTTGGAGTAATAAATCTCTAGAGGTGATTTGGAATAACATGACTTGGATGGAGTGGGAAAGAGAAATTGACAATTACACAAAAGAAATATACAACTTAATTGAAGAATCGCAGAACCAACAAGAAAAGAATGAACAAGAACTATTGGAATTGGATAAGTGGGCAAGTTTGTGGAATTGGTTTGAAATAACAAAATGGCTGTGGTATATCAAAATATTCATAATGATAGTAGGAGGCTTGGTAGGTTTAAGAATAGTTTGTGCTATACTTTCTATAGTAAATAGAGTTAGGCAGGGATACTCACCATTGTCATTGCAGACCCGCTTCCCAGCCCAGAGGGGACCCGGAAGGCCCGAAGGAATCGAAGAAGAAGGTGGAGAGCAAGACAGAGACAGATCCGAGAGATTAGTGAACGGATTATTGACACTTATCTGGGAGGATCTGCGGAGCCTGTGCCTCTTCAGCTACCACCGCTTGAGAGACTTACTTTGGATTGTGGAACTTCTGGGACGCAGGGGGTGGGAAATCCTCAAATATTTGTGGAATCTCCTGCAGTATTGGATTCAGGAGCTAAAGAATAGTGCTGTTAGCTTGCTTAACACCATAGCCATAGCAGTAGCTGAGGGGACAGATAGGGTTATAGAAGTAGTACAAAGAGCTTTTAGGGCTATTCTCCATATACCTACAAGAATCAGACAGGGACTCGAAAGGGCTTTGCTATAATGGGTGGCAAGTGGTCAAAATGTGGTATGGGTGGATGGCCTAGTGTAAGGGAAGGAATAAGACGAGCTGAGCCACGAGCTGAGACAGCAGCAGATGGGGTGGGAGCAGTATCTAGGGACCTGGAAAAACATGGAGCAATCACAAGTAGCAATGCAGCAAATGCTGATAGTGTCTGGCTGGAAGCACAAGAGGAGGAGGAGGTGGGCTTTCCAGTCAGACCTCAGGTACCTTTAAGACCAATGACTTACAAGGGAGCTTTAAATCTTAGCCACTTTTTAAAAGAAAAGGGGGGACTGGAAGGGCTAATTTACTCCCAGAAAAGACAAGAGATCCTTGATCTGTGGGTCTACCATACACAAGGCTACTTCCCTGATTGGCAGAATTACACACCAGGGCCAGGGACCAGATTCCCTCTGACCTTTGGATGGTGCTTTAAGCTAGTACCAGTTGAGCCAGAGCAGGTAGAAGAAGCCAACAAGGGAGAAAACAACTGCTTGTTACATCCTATGAGTCAACATGGAGTAGATGACCCAGAGAGAGAAGTGCTGATGTGGAAGTTTGACAGCCGCTTAGCATTCCATCACATGGCCCGACAGAAACATCCGGAGTACTACAAAGACTGCTGACATCGAGAGTTCTACAAGGGACTTTCCGCTGGGGACTTTCCAGGGGAGGCGTGGCATGGGCGGGACCGGGGAGTGGCGAGCCCGTAGATGCTGCATATAAGCAGCTGCTTTTTGCCTGTACTGGGTCTCTCTAGTCAGACCAGATCTGAGCCTGGGAGCTCTCTGGCTAACTAGGGAACCCGCTGCTTAAGCCTCAATAAAGCTTGCCTTGAGTGCTTC
>B.AU.x.C42_AF538305_J.SE.94.SE7022_AF082395
TGGAAGGGCTAATTTAGTCCCAGAAAAGACGAGATATCCTTGACCTGTGGATCTACAACACACAAGGCTACTTCCCTGATTGGCAGAACTACACACCAGGGCCAGGGGTCAGATATCCACTGACCTTTGGATGGTGCTTCAAGCTAGTACCAGTGGAGCCAGAGAAAGTAGAAGAGGCCACTAAAGGAGAGAACACCTGCTTGTTACACCCTATGAGCCTGCATGGGATGGATGACCCAGAGAAAGAAGTGTTACAGTGGAAGTTTGACAGCCGCCTAGCATTTCATCACGTGGCCCGAGAGCTGCATCCGGAGTACTACAACAACTGATGACAGCGAGCTTTCTACAAGGGACTTTCCGCTGGGGACTTTCCAGGGGAGGCGCGGCCTGGGCGGGACAGGGGAGTGGCGAGCCCTCAGATGCTGCATATAAGCAGCCGCTTTTGCCTGTACTGGGTCTCTCTGGTTAGACCAGATCTGAGCCTGGGAGCTCTCTGGCTGACTAGGGAACCCACTGCTTAAGCCTCAATAAAGCTTGCCTTGAGTGCTTCAAGTAGTGTGTGCCCGTCTGTTGTGTGACTCTGGTATCTAGAGATCCCTCAGACCAATTTAGTCAGTGTGGAAAATCTCTAGCAGTGGCGCCCGAACAGGGACCGGAAAGCGAAAGAAAAACCAGAGGAGCTCTCTCGACGCAAGACTCGGCTTGCTGAAGCGCGCATAGCAAGAGGCGAGGGGCGGCGACTGGTGAGTACGCCAAAAATTTTGACTAGCGGAGGCTAGAAGGAGAGAGATGGGTGCGAGAGCGTCAATATTAAGCGGCGGAAAATTAGACCAATGGGAAAAAATTCGGTTGCGGCCAGGAGGAAAGAAAAAGTATAAGTTTAAACATCTAGTATGGGCAAGCAGGGAGCTAGAACGATTCGCAGTCAATCCTGGCCTGTTAGAAACATCAGAAGGCTGTATACAAATACTGGGACAGCTACAACCGTCCCTTCAGACAGGATCAGAAGAACTTAAATCATTATTTAATACAGTAGCAACCCTCTATTGTGTGCATCAAAGGATAGATGTAAGAGATCCCAAGGAAGCCTTAGATAAGATAGAGGAAGAGCAAAACCAAATTAAGAAAAAGGCACAGCAAGCAGCAGCTGACACAGGAAAGCACAGCAAGGTCAGCCAAAATTACCCTATAGTACAGAACCTACAGGGGCAAATGGTACATCAAGCCTTATCACCCAGGACTTTAAATGCATGGGTAAAAGTAGTAGAAGAGAAGGCTTTCAGTCCAGAAGTCATACCCATGTTTTCAGCATTATCAGAAGGAGCCACCCCGCAAGATTTAAATACCATGCTAAACACAGTGGGGGGACATCAAGCAGCCATTCAAATGTTAAAAGAGACCATCAATGATGAAGCTGCAGAATGGGATAGATTGCATCCAGTGCATGCAGGGCCTATTGCACCAGGCCAGATGAGAGAACCAAGGGGAAGTGACATAGCAGGAACTACTAGTACCCTTCAGGAACAAATAGGGTGGATGACACATAATCCACCTATCCCAGTTGGAGAAATTTATAAAAGATGGATAATCCTGGGATTAAATAAAATAGTAAGAATGTACAGCCCTACCAGCATTCTGGACATAAGACAAGGACCAAAGGAACCCTTTAGAGACTATGTTGACCGGTTCTATAAAACTCTAAGAGCCGAGCAAGCTTCACAAGAGGTAAAAAATTGGATGACAGAAACCTTGTTGGTTCAAAATGCAAACCCAGATTGTAACACCATTTTAAAAGCATTGGGACCAGGAGCTACACTAGAAGAAATGATGACAGCCTGTCAGGGAGTGGGAGGACCCGGCCATAAAGCAAGAGATTTGGCTGAAGCAATGAGCCAAGTAACAAATTCAGCTACCATAATGATGCAGAAAGGCAATTTTAGGAACCAAAAAAGGATTGTTAAGTGTTTCAATTGTGGCAAAGAGGGGCACATAGCCAAAAATTGCAGGGCCCCTAGAAAAAAGGGCTGTTGGAAATGTGGAAGGGAAGGACACCAAATGAAAGATTGTACTGAAAGACAGGCTAATTTTTTAGGGAAAATCTGGCCTTCCCACAAGGGGAGGCCAGGGAATTTTGTTCAGAACAGACCAGAGCCATCAGCCCCACCGGCAGAGAGCTTCAGGTTTGGGGAGGAGACAACAACTCCCTCTCAAAAGCAGGAGCCGGTAGACAAGGAACTGTATCCCTTAGCCTCCCTCAGATCACTCTTTGGCAGCGACCCCTCGTCACAATAAAGATAGGGGGGCAACTAAAGGAAGCTCTATTAGATACAGGAGCAGATGATACAGTATTAGAAGAAATGAATTTGCCAGGAAGATGGAAACCAAAAATGATAGGGGGAATTGGAGGTTTTATCAAAGTAAGACAGTATGATCAGATACCTGTAGAAATCTGTGGACATAAAGCTATAGGTACAGGATTAGTAGGACCTACACCTGTCAACATAATTGGAAGAAATTTGTTGACTCAGATTGGTTGCACCTTAAATTTTCCCATTAGTCCTATTGAAACTGTACCAGTAAAATTAAAGCCAGGAATGGATGGCCCAAAAGTTAAACAATGGCCATTGACAGAAGAAGAAATAAAAGCATTAGTATAAATCTGTACAGAAATGGAAAAGGAAGGGAAAATTTCAAAAATTGGGCCTGAAAATCCATACAATACTCCAGTATTTGCCATAAAGAAAAAAGACAGTACTAAATGGAGAAAATTAGTAGATTTCAGAGAACTTAATAAGAGAACTCAAGATTTCTGGGAAGTTCAATTAGGAATACCACATCCCGCAGGGTTAAAGAAGAAAAAATCAGTAACAGTACTGGATGTGGGTGATGCATATTTTTCAGTACCATTAGATAAGGACTTCAGGAAGTATACTGCATTTACCATACCTAGCATAAACAATGAGACACCAGGGATTAGGTATCAGTACAATGTGCTTCCACAGGGATGGAAAGGATCACCAGCAATATTCCAAAGTAGCATGACAAAAATCTTAGAGCCTTTTAGAAAACAAAATCCAGACATAGTTATCTATCAATACATGGATGATTTGTATGTAGGCTCTGACTTAGAAATAGGGCAGCATAGAAAAAAGATAGAGGAACTGAGACAACATCTGTCGAGGTGGGGATTTACCACACCAGACAAAAAACATCAGAAAGAACCTCCATTCCTTTGGATGGGTTATGAACTCCATCCTGATAAATGGACAGTACAGCCTATAGTGCTGCCAGAAAAAGACAGCTGGACTGTCAATGACCTACAGAAGTTAGTGGGAAAATTGAATTGGGCAAGTCAGATTTACCCAGGGATTAAAGTAAAGCAATTATGTAAACTCCTTAGGGGAACCAAAGCACTAACAGAAGTAGTACCACTAACAGAAGAAGCAGAGCTAGAACTGGCAGAAAACAGGGAGATTCTAAAAGAGCCAGTACATGGAGTGTATTATGACCCATCAAAAGACTTAATAGCAGAACTACAGAAGCAGGGGCAAGGCCAATGGACATATCAAATTTATCAAGAGCCATTTAAAAATCTGAAAACAGGAAAGTATGCAAAAATGAGGGGTGCCCACACTAATGATGTAAAGCAATTAACAGAGGCAGTGCAAAAAATAGCCACAGAAAGCATAGTAATATGGGGAAAGACCCCTAAGTTTAAACTACCCATACAAAAAGAAACATGGGAAGCATGGTGGACAGAGTATTGGCAAGCCACCTGGATTCCTGAGTGGGAGTTTGTCAATACCCCTCCCTTAGTAAAATTATGGTACCAGTTAGAAAAAGAACCCATAGTAGGAGCAGAAACTTTCTATGTAGATGGGGCAGCTAACAGGGAGACTAAATTAGGAAAAGCAGGATATGTTACTGACAAAGGAAGACAGAAAGTAATTACCCTAACTGACACAACAAATCAGAAGACTGAACTACAAGCCATTTATTTAGCTTTACAGGATTCAGGGATAGAAGTAAACATAGTAACAGATTCACAATATGCATTGGGGATTATTCAAGCACAACCAGATAAAAGTGAATCAGAGTTAGTCAGTCAAATAATAGAGCAGTTAATAAAAAAGGAAAAGGTCTACCTAGCATGGGTACCTGCACACAAAGGAATTGGAGGAAATGAACAAGTAGATAAATTAGTCAGTGCTGGAATCAGGAAAGTACTATTTTTAGATGGAATAGATAAGGCCCAAGAAGAACATGAGAAGTATCACAGTAATTGGAGAGCAATGGCTAGTGATTTTAACCTGCCGCCTATAGTAGCAAAAGAAATAGTAGCCAGCTGTGATAAATGTCAACTAAAAGGGGAAGCCATGCATGGACAAGTAGACTGTAGTCCAGGAATATGGCAACTAGATTGTACACATTTAGAAGGAAAAGTTATCCTGGTAGCAGTTCATGTAGCCAGTGGATATATAGAAGCAGAAGTTATTCCAGCAGAGACAGGGCAGGAAACAGCATACTTTATCCTAAAATTAGCAGGAAGATGGCCAGTAACAACAATACATACAGACAATGGCAGCAATTTCATCAGTGCTACGGTTAAGGCCGCCTGCTGGTGGGCGGGGATCAAGCAAGAATTTGGCATTCCCTACAATCCCCAAAGTCAAGGAGTAGTAGAATCTATGAATAAAGAATTAAAGAAAATTATAGGGCAAGTGACAGATCAGGCTGAACATCTTAAGACAGCAGTACAAATGGCAGTATTCATCCACAATTTTAAAAGAAAAGGGGGGATTGGGGAGTACAGTGCAGGAGAAAGAATAGTAGACATAATAGCAACAGACATACAAACTAAAGAATTACAAAAACAAATTACAAAAATTCAAAATTTTCGGGTTTATTACAGGGACAGCAGAGATCCACTTTGGAAAGGACCAGCAAAGCTTCTCTGGAAAGGTGAAGGGGCAGTAGTAATACAAGATAATAGTGACATAAAAGTAGTGCCAAGAAGAAAAGCAAAGATCATTAGGGATTATGGAAAACAGATGGCAGGTGATGATTGTGTGGCAAGAAGACAGGATGAGGATTAGAACTTGGAACAGTTTAGTAAAACATCATATGTATATTTCAAAGAAAGCTAAGGGATGGTCTTATAGACATCACTATGAAAGCATTAATCCAAGAATAAGTTCAGAAGTACACATCCCACTAGGGGATGCTAAATTGATAGTAACAACATATTGGGGTCTGCATACAGGAGAAAGAGACTGGCATTTGGGTCATGGAGTCTCCATAGAATGGAGGAAAAAGAACTATGGCACACAAGTAGACCCCGACCTAGCAGACAAACTAATTCACCTGTATTACTTTGATTGTTTTTCAGAAACTGCTATAAGAAATGCCATATTAGGACGTATAGTTAGTCCTAGTTGTGAATATCAAGCAGGACATAACAAGGTAGGATCTCTACAGTACTTGGCACTGACAGCATTAATAACACCAAAAAAGATAAAGCCACCTTTGCCTAGTGTTAAGAAACTGACAGAGGATAGATGGAACAAGCCCCAGAAGACCAAGGGCCACAGAGGGAGCCATACAATGAATGGACACTAGAACTTTTAGAGGAGCTTAAAAATGAAGCTGTTAGACATTTTCCTAGGGTATGGCTTCATGGCTTAGGGCAACATATCTATGAAACTTATGGGGATACTTGGGAAGGAGTGGAAGCCATAACAAGAATTCTGCAACAACTGCTGTTTATTCATTTCAGAATTGGGTGTCAACATAGCAGAATAGGCATCCTACGAAGGAGAACAAGAAATGGAGCCAGTAGATCCTAGACTAGAGCCCTGGAAGCATCCAGGAAGTCAGCCTAGGACTGCTTGTACCGCTTGCTATTGTAAAAAGTGTTGCTTTCATTGCCAAGTTTGCTTCATAACAAAAGGCTTAGGCATCTCCTATGGCAGGAAGAAGCGGAGACAGCGACGAAGACCTCCTAAAGACTGTCAGACTCATCAAGCTCCTTTATCAAAGCAGTAAGTAGTGAATGTGATGCAACCTTTAGTAATAGGATCAATAGCATTAGTAGTAGTAGCAATAATAGCAATAGTTGTGTGGTCCATAGTATTCATAGAATATAGGAAAATATTAAGACAAAGAAAAATAGATAGGTTAATTGATAGGATAAGAGAAAGAGCAGAAGACAGGGGAAATGAGAGTGAAGGGGATCAGGAAGAGCTGGCAGGACTTGTGGAAATGGGGCACCATGCTCCTTGGGATATTGATGATCTGTAGGGCTGCAGAAGATTTATGGGTCACAGTCTATTATGGGGTACCTGTGTGGAAAGAAGCAACCACCACTCTATTTTGTGCATCAGATGCTAAAGCATATGATACAGAGGTACATAATGTTTGGGCCACACATGCCTGTGGACCCACAGACCCCAACCCACACGAACAAGAATTGGTAAATGTGACAGAAAACTTTAACATGTGGAAAAATGACATGGTGGACCAGATGCATGAGGATGTAATCAGTTTATGGGATCAAAGCCTAAAGCCATGTGTAAAATTAACCCCACTCTGTGTTACTTTAAATTGCACTGATGCTAATACCACTAGTAGTACTAATACCACTAATGGTACTAATCCCACTATTAGTGGCAGGAAAATGGAGAAAGGAGAAGAGCAAAACTGCTCTTTCAACGTCACCACAAGCATAAGAGATAAGGTGCGGAAAGAATATGCACTCTTTTATAAACTTGATGTAGTACCTGATGATAACAAAACTAATCCCAATTATACCAACTATAGGTTGATAAGTTGTAACACCTCAGTCATTACCCAAGCCTGTCCAAAAATATCCTTTGAGCCAATTCCCATACATTATTGTGCCCCGGCTGGTTATGCGATCCTAAAATGTAAAGATAAGAAGTTCAATGGAACAGGACCATGTAAAAATGTCAGCACAGTACAATGTACACATGGAATTAGGCCAGTAGTGTCAACTCAACTACTATTAAATGGCAGCCTAGCAGAAGAAGAGGTGGTAATTAGATCTAGCAATATCACAGACAATGCTAAAACCATAATAGTACAGCTGAAAGACGCTGTAAACATTACTTGTGCAAGACCCAACAACAATACAAGAAAAAGTATAAATATAGGACCAGGGAGAGCATTTTTTGCAAGAGGAGACATAATAGGAGATATAAGACAAGCACATTGTAACATTAGTAGACAACAATGGAATAACACTTTAAAACAGGTAGTTAAAAAATTAAGAGAGCAATTTGGAAATAATAAAACAATAATCTTTAATCAATCCTCAGGAGGGGACCCAGAAATTGTAATGCACAGTTTTAATTGTGGAGGGGAATTTTTCTACTGTAATACAACACAACTGTTTAATAGTACTTGGAATGTTACTGAAGGGTTAAATGCAACTACAGAAGATAATGCTACAATAAGATAGGGCACACTCCCATGCAAAATAAAACAAATTATAAACATGTGGCAGGAAGTAGGAAAAGCAATGTATGCCCCTCCCATCAGTGGACAAATTAGATGTTCATCAAATATTACAGGGCTGCTATTACCAAGAGATGGTGGTAATAATAACAATGGGTCCGAGATCTTCAGACCTGGAGGAGGCGATATGAGGGACAATTGGAGAAGTGAATTATATAAATATAAAGTAGTAGTAATTGAACCATTAGGAGTAGCACCCACCAAGGCAAAAAGAAGAGTGGTGCAGAGAGAAAAAAGAGAACTGAGAGTAGGAGCTTTGTTCCTTGGGTTCTTGGGAGCAGCAGGAAGCACTATGGGCGCAGCGTCAGTGACGCTGACGGTACAGGCCAGACTATTATTGTCTGGTATAGTGCAGCAGCAGAACAATCTGCTGAAGGCTATTGAGGCGCAACAGCATCTGTTGCAACTCACAGTCTGGGGCATCAAGCAGCTCCAGGCAAGAGTCCTGGCTATAGAAAGATACCTAAAGGATCAACAGCTCCTGGGGATTTGGGGTTGCTCTGGAAAACTCATCTGCACCACTACTGTGCCTTGGAATACTAGTTGGAGTAACAGATCTCTAAATGATATTTGGGATAATATGACCTGGATGCAGTGGGAAAGAGAAATTGATAATTACACAGACACAATATACATGTTACTTGAAAAATCACAGAACCAACAAGAGAAGAATGAACAAGAATTATTAGAATTAGATAAATGGGCAAATTTGTGGAATTGGTTTGACATATCAAATTGGCTGTGGTATATCAGAATATTCATAATGATAGTAGGAGGCTTGGTAGATTTAAGAATAGTTTTTACTGTACTTTCTATAGTAAATAGAGTTAGGCAGGGATACTCACCATTGTCGTTTCAGACCCGCCTCCCAACCCAGAGGGGACCCGACAGGCCCGAAGGAATCGAACAAGAAGGTGGAGAGAGAGACAGAGACAGATCCGCCAGATTAGTGGATGGATTATTAGCACTTATCTGGATCGATCTTCGGAGCCTGTGCCTTTTCCTCTACCACCGCTTGAGAGACTTACTCTTGATTGTAACGAGGATTGTGGAACTTCTGGGACGCAGGGGGCGGGAAGCCCTCAAGTATTGGTGGAATCTCCTGCAGTATTGGGGTCAGGAACTAAAGAATAGTGCTATTAGCTTGCTCAACGCTACAGCCATAGCAGTAGCTGAGGGGACAGATAGGCTTATAGAAGTATTGCAAGAAGCTTATAGAGCTATTATCCACATACCTACAAGAATAAGACAGGGCTTGGAAAGGATTTTGCTATAACATGGGTGGCAAGTGGTCAAAATGCAGTTTGGGAGGATGGTCTACTGTAAGAGAAAGAATGAGACGAGCTGAGCCAGCAGCAGAGGGGGTGGGAGCAGTATCTCGAGACCTGGAAAAACATGGGGCAATCACAAATAGCAATACAGCAGCTACCAATGCTGATTGTGCCTGGCTAGAAGCACAACAAGAAGAGGAGGAGGTGGGCTTTCCAGTCAGACCTCAGGTACCTTTAAGGCCAATGACTTACAAGGCAGCTGTAGATCTTAGCCACTTTTTAAAAGAAAAGGGGGGACTGGAAGGGCTAATTTACTCCCAGAAAAGACGAGATATCCTTGACCTGTGGATCTACAACACACAAGGCTACTTCCCTGATTGGCAGAACTACACACCAGGGCCAGGGGTCAGATATCCACTGACCTTTGGATGGTGCTTCAAGCTAGTACCAGTGGAGCCAGAGAAAATAGAAGAGGCCACTAAAGGAGAGAACACCTGCTTGTTACACCCTATGAGCCTGCATGGGATGGATGACCCAGAGAAAGAAGTGTTACAGTGGAAGTTTGACAGCCGCCTAGCATTTCATCACGTGGCCCGAGAGCTGCATCCGGAGTACTACAAAAACTGATGA
>B.US.97.ARES2_AB078005_K.CD.97.EQTB11C_AJ249235
CAAGGATCCTTCCCTGATTGGCAGAACTACACACCAGGGCCAGGGGTCAGATTTCCACTGACCTTTGGATGGTGCTTCAAGCTAGTACCAGTTGAGCCAGAGAAGGTAGAAGAGGCCAATGAAGGAGAGAACAACAGCCTGCTACACCCCCTGAGCCTGCATGGAATGGAGGACCCGGAGAAAGAAGTGTTAGTGTGGAGATTTGACAGCCGCCTAGCATTTCATCACATGGCCCGAGAGATGCACCCGGAGTTTTACAAGAACTGCTGACAGCAAGAAGAACTGCTGACATCGAGCTTTCTACAAAGGGACTTTCCGCTGGGGACTTTCCAGGGAGGCGTGGCTGGGCGGGACTGGGGAGTGGCGAGCCTCAGATGCTGCATATAAGCAGCTGCTTTTTGCCTGTACTGGGTCTCTCTGGTTAGACCAGATCTGAGCCTGGGAGCTCTCTGGCTAGCTAGGGAACCCACTGCTTAAGCCTCAATAAAGCTTGCCTTGAGTGCTTAAAGTAGTGTGTGCCCGTCTGTTGTGTGACTCTGGTAACTAGAGATCCCTCAGACCCTTTAGTCAGTGTGGAAAATCTCTAGCAGTGGCGCCCGAACAGGGACTTGAAAGCGAAAGAGAAACCAGAGGAGATCTCTCGACGCAGGACTCGGCTTGSTGAAGCGCGCACGGCAAGAGGCGAGGGGCGGCGACTGGTGAGTACGCCAAACATTTTGACTAGCGGAGGCTAGAAGGAGAGAGATGGGTGCGAGAGCGTCAGTATTAAGCGGGGGACAATTAGATAGATGGGAAAAAATTCGGCTCAGGCCAGGGGGAAAGAAAATGTATAAATTAAAACATATAGTATGGGCAAGCAGGGAGCTAGAACGATTCGCAGTTAATCCTGGCCTGTTAGAAACATCAGAAGGCTGTAGACAAATACTGGGACAGCTACAACCAGTCCTACAGACAGGATCAGAAGAACTTAGATCATTATATAATACAATAGCAGTCCTCTATTGTGTGCATCGAAGGATAGAGGTAAAAGACACCAAGGAAGCTTTAGACAAAATACAGGAAGAGCAAAACAAAAGTAAGAAAAAAGAACAGCAAGCAGCAGCTGACACAGGAAATAGCAGCCAGGTCAGCCAAAATTACCCTATAGTGCAGAACATGCAGGGGCAAATGGTACATCAGGCCATATCACCTAGAACTTTAAATGCATGGGTAAAAGTAGTAGAAGAGAAGGCTTTCAGCCCAGAAGTAATACCCATGTTTTCAGCATTATCAGAAGGAGCCACCCCACAAGATTTAAACACCATGCTGAACACAGTGGGGGGACATCAAGCAGCCATGCAAATGTTAAAAGAGACCATCAATGAGGAAGCTGCAGAATGGGATAGATTGCATCCAGTGCATGCAGGGCCTATCGCACCAGGCCAGATGAGAGAACCAAGGGGAAGTGACATAGCAGGAACTACTAGTACCCTTCAGGAACAAATAGGATGGATGACAAATAATCCACCTATCCCAGTAGGAGAAATTTATAAAAGATGGATAATCCTGGGATTAAATAAAATAGTAAGGATGTATAGCCCTACCAGCATTCTGGACATAAGACAAGGACCAAAGGAGCCCTTTAGAGACTATGTAGACCGGTTCTATAAGACTCTAAGAGCCGAGCAAGCCTCACAGGAGGTAAAAAATTGGATGACAGAAACCTTGTTGGTCCAGAATGCGAACCCAGATTGTAAGACTATTTTAAAAGCATTGGGGCCAGCAGCCACACTAGAGGAAATGATGACAGCATGTCAGGGAGTGGGAGGACCCGGCCATAAAGCAAGAGTTTTGGCTGAGGCAATGAGTCAAGTAACAAATTCAGCTACCATAATGATGCAGAAAGGCAATTTTAGGAACCAAAGAAAGATTGTTAAGTGTTTCAATTGTGGCAAAGAAGGGCACATAGCCAGAAATTGCAGGGCCCCTAGAAAAAAGGGCTGTTGGAAATGTGGAAAGGAAGGACACCAAATGAAAGATTGTACTGAGAGACAGGCTAATTTTTTAGGGAAGATCTGGCCTTCCCACAAGGGAAGGCCAGGGAATTTTCTTCAGAGCAGACCAGAGCCAACAGCCCCACCAGAAGAGAGCTTCAGGTTTGGGGAGGAGACAACTCCCCCTCAGAAGCAGGAGCCAATAGACAAGGAACTGTATCCTTTAGCTTCCCTCAAATCACTCTTTGGCAACGACCCCTCGTTACAATAAAGGTAGGGGGGCAACTAAAGGAAGCTCTGTTAGACACAGGAGCAGATGATACAGTATTAGAAGAAATGAATTTGCCAGGAAGATGGAAACCGAAAATGATAGGGGGAATTGGAGGTTTTATTAAAGTAAGACAGTATGATCAGATACTCATAGAAATCTGTGGACATAAAGCTATAGGTACAGTATTGGTAGGACCTACACCTGTCAACATAATTGGAAGAAATCTGTTGACTCAGATTGGTTGCACTTTAAATTTTCCTATTAGTCCTATTGAAACTGTACCAGTAAAATTAAAGCCAGGAATGGATGGCCCAAAAGTTAAACAATGGCCATTGACAGAAGAAAAAATAAAAGCATTAGTAGAAATTTGTACAGAAATGGAAAAGGAAGGTAAGATTTCAAAAATTGGGCCTGAAAATCCATACAATACTCCAGTATTTGCCATAAAGAAAAAAGACAGTACTAAATGGAGAAAATTAGTAGATTTCAGAGAACTTAATAAGAGAACTCAAGACTTCTGGGAAGTTCAATTAGGAATACCACATCCCGCAGGGTTAAAAAAGAAAAAATCAGTAACAGTACTGGATGTAGGTGATGCATATTTTTCAGTTCCCTTAGATGAAGATTTCAGGAAGTATACTGCATTTACCATACCTAGTATAAACAATGAGACACCAGGGATTAGATATCAGTACAATGTGCTTCCACAGGGATGGAAAGGATCACCAGCAATATTCCAATGTAGCATGACAAAGATCTTAGAGCCTTTTAGACAACAAAATCCAGACATAGTTATCTATCAATACATGGATGATTTGTATGTAGGATCTGACTTAGAAATAGGGCAACATAGAACAAAAATAGAGGAACTGAGACAGCATCTGTTGAGGTGGGGGTTTACCACACCAGACAAAAAGCATCAGAAAGAACCTCCATTCCTTTGGATGGGTTATGAACTCCATCCTGATAAATGGACAGTACAGCCTATAGTGCTGCCAGAAAAAGACAGCTGGACTGTCAATGACATACAGAAATTAGTGGGAAAATTAAATTGGGCAAGTCAAATTTATGCAGGGATTAAAGTAAAGCAATTATGTAAGCTCCTTAGGGGAACCAAAGCACTAACAGAAGTAATACCACTAACAGAAGAAGCAGAGCTAGAACTGGCAGAAAACAGGGAGATTCTAAAAGAACCAGTACATGGAGTGTATTATGACCCATCAAAAGACTTAATAGCAGAACTACAGAAACAGGGGCAAGGCCAATGGACATATCAAATTTATCAAGAGCCATTTAAGAATCTAAAAACAGGAAAGTATACAAGAATGAGGGGTGCCCATACTAATGATGTAAAACAGTTAACAGAGGCAGTGCAAAAGGTAGCTACAGAAAGCATAGTAATATGGGGAAAGACTCCTAAATTTAAACTACCCATACAAAAGGAGACATGGGAAACATGGTGGACGGAGTATTGGCAAGCCACCTGGATTCCTGAGTGGGAGTTTGTCAATACCCCTCCCTTAGTAAAATTATGGTACCAGTTAGAGAAAGAACCCATAGTAGGAGCAGAAACTTTCTATGTAGATGGGGCAGCTAATAGGGAGACTAAATCAGGAAAAGCAGGATATGTTACTGACAGAGGAAGACAAAAAGTTGTCCCCATAGCTGACACAACAAATCAGAAGACTGAATTACAAGCAATTCATCTAGCTTTGCAGGATTCGGGACTAGAAGTAAACATAGTAACAGACTCACAATATGCATTAGGAATCATTCAAGCACAACCAGATAAGAGTGAATCAGAATTAGTCAGTCAAATAATAGAGCAGTTAATAAAAAAGGAAAAAGTCTACCTGGCATGGGTACTAGCACACAAAGGAATTGGAGGAAATGAACAAGTAGATAAATTAGTTAGTACTGGAATCAGGAAAGTACTATTTTTAGATGGAATAGACAAGGCCCAAGAAGAACATGAAAAATATCACAGTAATTGGAGAGCAATGGCTAGTGACTTTAACCTGCCACCTGTAGTAGCAAAAGAAATAGTAGCTAGTTGTGATAAATGTCAGTTAAAAGGAGAAGCCATGCATGGACAAGTAGACTGTAGCCCAGGAATATGGCAACTAGATTGTACACATTTAGAGGGAAAAATTATCCTGGTAGCAGTTCATGTAGCCAGTGGATATATAGAAGCAGAAGTCATTCCAGCAGAGACAGGACAGGAAACAGCATACTTTATCTTAAAACTAGCAGGAAGATGGCCAGTAAAAACAGTACATACAGACAATGGCAGCAATTTCACTAGTACTACTGTTAAGGCTGCCTGTTGGTGGGCAGGGATCAAACAGGAATTTGGCATTCCCTACAATCCCCAAAGTCAAGGAGTAGTGGAATCTATGAATAAAGAATTAAAGAAAATTATAGGACAGGTAAGAGATCAGGCTGAACATCTTAAGACAGCAGTACAAATGGCAGTACTCATCCACAATTTTAAAAGAAAAGGGGGGATTGGGGGGTACAGTGCAGGGGAAAGAATAGTAGACATAATAGCAACAGACATACAAACTAAAGAATTACAAAAACAAATTACAAAAATTCAAAATTTTCGGGTTTATTACAGGGACAGCAGAGATCCACTTTGGAAAGGACCAGCAAAGCTTCTCTGGAAAGGTGAAGGGGCAGTAGTAATACAAGACAATAGTGACATAAAAGTAGTGCCAAGAAGAAAAGTAAAGATCATTAGGGATTATGGAAAACCGATGGCAGGTGATGATTGTGTGGCAAGTAGACAGGATGAGGATTAAACACATGGAAAATTTTAGTAAATACCATATGCATGTTTCAGGAAGAACTAAGGAATGGCGGTATAGACATCATTATGAAAGCACTCATCCTAGAATAAGTTCAGAAGTACACATCCCACTAGGGGAAGCTAGATTGGTAATAACAACATATTGGGGTCTGCATACAGGAGAAAGAGACTGGCATTTGGGCCAGGGAGTCTCCATAGAATGGAGGAAAAAGAGATATAGCACACAAGTAGACCCTGGCCTAGCAGACCAACTAATTCACATGTATTATTTTGATTGTTTTTCAGAATCTGCTATAAGAAATGCCATATTAGGACGTATAGTTAGTCCTAGGTGTGACTATCAAGCAGGACATAACAAGGTAGGATCTCTACAGTACTTGGCACTAACAGCATTAATAACACCAAAAAGGATAAAGCCACCTTTGCCTAGTGTCACAAAACTGACAGAGGATAGATGGAACAAGCCCCAGAAAACCAAGGGCCGCAGAGGGAGCCGCACAATGAATGGACACTAGAGCTTTTAGAGGAGCTTAAGAGTGAAGCTGTCAGACATTTTCCTAGGGTATGGCTACGTGGCTTAGGACAGCATATCTATGAAACTTATGGGGACACTTGGCCAGGAGTGGAAGCCCATAATAAGAACTCTGCAACCAACTGCTGTTTATTCATTTCAGAATTGGGTGTCAAACATAGCAGAATAGGCATTACTCGACAGAGGAGAGCAAGAAATGGAGCCAGTAGATCCTAATCTAGAGCCCTGGAAGCATCCAGGAAGTCAGCCTAAGACTGCGTGTACCACTTGCTATTGTAAAAAGTGTTGCTTTCATTGCCAAGTTTGTTTCATAACAAAAGGCTTAGGCATCTCCCATGGCAGGAAGAAGCGGAGACAGCGACGAAGAGATCCTCAAGACAGTCAGACTAATCAAGTTTCTCTACCAAAGCAGTAAGTATCACATGTAATGCAACCTTTAAACATAGCAGCAATAGTAGCATTAGTAGTAGCAACAATAATAGCAATAGTTGTGTGGACCATAGTACTCATAGAATATAGAAAAATATTAAAACAAAGGAAAATAGACAGATTAATTGATAGAATAAGAGAAAGAGCAGAAGACAGTGGCAATGAAAGCGAAGGGGACCAGGAGGAATTATCAGCACTTGTGGAGAGGGGGCATGATGCTCCTTGGGATGTTAATGATCTGTAGTGCTGCAGCAAATTTGTGGGTCACAGTCTATTATGGAGTACCAGTGTGGAGAGAGGCAAACACCACTCTATTTTGTGCATCAGATGCTAAAGCATATGATACAGAGGCACATAATGTTTGGGCCACCCATGCCTGTGTACCCACAGACCCCAGCCCACAAGAAGTGGTATTGAAAAATGTGACAGAAAATTTTAACATGTGGAAAAATAACATGGTAGACCAGATGCTTGAGGATATAATCAGTTTATGGGATCAAAGCCTAAAACCATGTGTAAGATTAACCCCACTCTGTGTTACTTTAAAATGCAATGATACTAGGAATAATACTAATACCACTGAAAATAGTTGGGAAAAGATGGAGCCAGGAGAAATAAAAAATTGCTCTTTCAATTTCACCACAAGCATGAGAACTAAGGTGCAGACACAACATGCACTTTTTTATAGCCTTGATGTAGCACCAATAAATAAGAAGAATAAGACTTATAGGTTGATAAGTTGTAACACCTCAGTCATTACACAAGCCTGTCCAAAGATAAACTTTGAGCCAATTCCCATACATTATTGTGCCCCGGCTGGTTTTGCGATTCTAAAATGTAATGATAACAAGTTCAATGGGACAGGACCATGTAAAAATGTCAGCACAGTACAATGTACACATGGAATTAAGCCAGTAGTATCAACTCAACTGCTGTTAAATGCCAGTCTAGCAGAAGAAGATGTAGTAATTAGATCTGAGAATTTCTCGAACAATGTTAAAATCATAATAGTACACCTGAATAAGTTTGTAGCAATTAATTGTACAAGACCCAACAACAATACCAGAAAGAGTATACATATGGGACCAGGAAGAGCATTCTATGCAACAGGTGACATAATAGGAGATATAAGGCAGGCGCATTGTAACATTAGCGGAGGACAGTGGAATAAAACTGTAAACCAAGTAAAGAAAGAATTAGGAAAACACTTTAACAAAACAATAATATTTCAACCATCCTCAGGAGGGGACCCAGAAATTGCAATGCACAGTTTTAATTGTGGAGGGGAATTTTTCTACTGTAATACAACAAAACTGTTTGATAAGATTTGGAATGGTACTGGGTGGGTAAATAAAAATAACACTGAAGAAAATAGCACAATCATCACACTCCCATGCAAAATAAAACAAATTATAAACATGTGGCAGGGAGTAGGAAAAGCAATGTATGCCCCTCCCATCAGAGGAAACATTAGCTGTTCATCAAAAATTACAGGACTGTTGTTAACAAGAGACGGTGGTAACGAGAGCAGCAGCACCAACGAGACCTTCAGACCTGGGGGAGGAGATATGAAAGACAATTGGAGAAGTGAATTATATAAATATAAAGTAGTAAAACTTGAACCAATAGGAATAGCACCCACCGAGGCAAAGAGAAGAGTGGTGCAGAGAGAAAAAAGAGCAGTGGGAATGCTAGGAGCTATGTTCCTTGGGTTCTTGGGAACAGCAGGAAGCACTATGGGCGCAGCGTCAATAGCGCTGACGGTACAGGCCAGACAATTATTGTCTGGTATAGTGCAACAGCAGAACAATTTGCTGAGAGCTATTGAGGCGCAACAGCATCTGTTGCAACTCACAGTCTGGGGCATCAAGCAGCTCCAGGCAAGAGTCCTGGCTGTGGAAAGATACCTAAAGGATCAACAGCTCCTAGGGATTTGGGGTTGCTCTGGAAAACTCATTTGCACCACTGCTGTGCCTGGGAATACTAGTTGGAGTAATAAATCCCTGGATAAGATTTGGAATAACATGACTTGGATGGAGTGGGAAAGAGAAATTGACAATTATACAGGCTTAATATACACCTTAATTTCAGAATCGCAGAACCAACAAGAAAAGAATGAACTAGAATTATTAAAATTAGATCAATGGGCAAGTTTGTGGAATTGGTTTGACATAACAAAATGGCTGTGGTATATAAAAATATTCATAATGATAGTAGGGGGCTTGATAGGTTTAAGAATAGTTTTTGCTATACTTGCTATAGTGAATAGAGTTAGGCAGGGATACTCACCATTATCGTTTCAGACCCGCCTCCCAGCCCAGAGGGGACCCGACAGGCCCGAAGGAATCGAAGAAGAAGGTGGAGAGAGAGACAGAGACAGATCCGGTCCATTAGTGAACGGATTCTTGACACTTATCTGGGTGGATCTACGGAGCCTGGTCCTCTTCAGCTACCACCGCTTGAGAGACTTACTCTTAATTGTAACGAGGATTGTGGAACTTCTGGGACGCAGGGGGTGGGAAGTCCTCAAATATTGGTGGAATCTCCTGCAGTATTGGATTCAGGAACTAAAAAATAGTGCTGTTAGTTTGCTAAATAGCACAGCTATAGTAGTAGCTGAGGGGACAGATAGGGTTATAGAAATAGCACAAAGAGTTTATAGAGCTTTCCTCCACGTACCTAGAAGAATAAGACAGGGCTTCGAAAGGGCTTTGCTATAAGATGGGTGGCAGATGGTCAAAGAGTAGTATATTTGGATGGCCTGCTGTAAGGGAAAGAATAAGACGAACTGACCCGGCAGCAGATGGGGTGGGAGCAGTATCTCGAGACCTGGAAAAATATGGAGCAATCACAAGTAACAACACAGCAGCTAACAATGCTGATTGTGCCTGGCTAGAAGCACAGGAGGAGGAGGAGGTGGGTTTTCCAGTCACACCTCAGGTACCTCTGAGACCAATGACTTACAAGGCAGCTGTAGATCTTAGCCACTTTTTAAAAGAAAAGGGGGGACTGGAAGGGCTAATTTACTCCCAAAAAAGACAAGATATCCTTGATCTGTGGATCTACCACACACAAGGCTACTTCCCTGATTGCCAGAACTACACACCAGGGCCAGGGGTCAGATTTCCACTGACCTTTGGATGGTGCTTCAAGCTAGTACCAGTTGAGCCAGAGAAGGTAGAAGAGGCCAATGAAGGAGAGAACAACAGCCTGCTACACCCCCTGAGCCCGCATGGAATGGAGGACCCGGAGAAAGAAGTGTTAGTGTGGAGATTTGACAGCCGCCTAGCATTTCATCACATGGCCCGAGAGATGCACCCGGAGTTTTACAAGAACTGCTGACAGCAAGAAGAACTGCTGACATAGAGCTTTCTACAAAGGGACTTTCCGCTGGGGACTTTCCAGGGAGGCGTGGCCTGGGCGGGACTGGGGAGTGGCGAGCCTCAGATGCTGCATATAAGCAGCTGCTTTTTGCCTGTACTGGGTCTCTCTGGTTAGACCAGATCTGAGCCTGGGAGCTCTCTGGCTAGCTAGGGAACCCACTGCTTAAGCCTCAATAAAGCTTGCCTTGAGTGCTTAAAGTAGTGTGTGCCCGTCTGTTGTGTGACTCTGGT
>C.BW.96.96BW15C02_AF110974_D.KR.04.04KBH8_DQ054367
CACTGCTTAAGCCTCAATAAAAGCTTGCCTTGAGTGCTCTAAGTAGTGTGTGCCCGTCTGTTGTGTGACTCTGGTAACTAAAGATCCCTCAGACCCTTTTTGGTATTGTGGAAAATCTCTAGCAGTGGCGCCCGAACAGGGACCTGAAAGCGAAAGTAAGGCCAGAGGAGATCTCTCGACGCAGGACTCGGCTTGCTGAATTGCACTCGGCAAGAGGCGAAAGCGGCGGCTGGTGAGTACGCCAAATTTTATTTGACTAGCGGAGGCTAGAAGGAGAGAGATGGGTGCGAGAGCGTCAAGATTAAAAGGGGAAAAATTGGATACATGGGAAAAAATTAGGTTAAGGCCAGGGGGAAAGAAATGTTATATGTTAAAACACATAGTATGGGCAAGCAGGGAGCTGGAAAGATTTGCACTTAACCCTGGCCTTTTGGAAACATCAGAAGGCTGTAAACAGATAATGAAACAGCTACAACCAGCTCTTCAGACAGGAACAGAGGAACTTAGATCATTATTCAATACGGTAGCAACCCTCTATTGTGTACATGAAAGAATAAATGTAAAGGACACCAAGGAAGCTTTAGACAAAATAGAGGAGGAACAAAACAAAAGTAAAAAAAAAGCACAGCAAGCAACAGCTGACACAAAAAACAACAGCCAGGTCAGCCAAAATTATCCTATAGTGCAGAATCTCCAAGGGCAAATGGTACACCAGGCCATATCACCTAGAACCTTGAATGCATGGGTAAAGGTAATAGAAGAAAAAGCTTTTAGCCCGGAGGTAATACCCATGTTTACAGCATTATCAGAAGGAGCCACCCCACAAGATTTAAATACCATGTTAAATACAGTGGGGGGACATCAAGCAGCCCTGCAAATGTTAAAAGACACCATCAATGAGGAGGCTGCAGAATGGGATAGATTACATCCAGTACACGCAGGGCCTATTGCACCAGGCCAAATGAGAGAACCAAGGGGAAGTGACATAGCAGGAACTACTAGTACCCTTCAGGAACAAATAGCATGGATGACAAGTAACCCACCTATTCCAGTGGGAGACATCTATAAAAGGTGGATAATTCTGGGGTTAAATAAAATAGTAAGAATGTATAGCCCTGTCAGCATTCTAGACATAAGACAAGGGCCAAAGGAACCCTTTAGAGACTATGTGGACCGGTTCTTCAAAACTTTAAGAGCTGAACAAGCCACACAAGATGTAAAAAATTGGATGACAGACACCTTGCTGGTCCAAAATGCGAACCCAGATTGTAAAACCATTTTAAGAGCATTAGGACCAGGGGCTACATTAGAAGAAATGATGACAGCATGTCAGGGAGTGGGAGGACCTGGCCACAAAGCAAGAGTGCTGGCTGAGGCAATGAGCCAAGCAACCAGCGCAAACATACTGATGCAGAGAAGCAATTTCAAAGGCCCTAAAAGAATTATTAAATGTTTCAACTGTGGCAAGGAAGGGCACATAGCTAGAAATTGTAGGGCCCCTAGGAAAAAAGGCTGTTGGAAATGTGGAAAGGAAGGACACCAAATGAAAGACTGTACTGAGAGGCAGGCTAATTTTTTAGGGAAGATTTGGCCTTCCCACAAGGGAAGGCCAGGGAATTTCCTTCAGAACAGAACAGAGCCAACAGCCCCACCAGCAGAGAGCTTCAAGTTCGAGGAGACAACCCCCGCTCCGAAGCAGGAGCCGAAAGACAGGGAACCCTTAATTTCCCTCAAATCACTCTTTGGCAGCGACCCCTTGTCTCAATAAAAGTAGGGGGTCAAATAAAGGAGGCTCTCTTAGACACAGGGGCTGATGATACAGTATTAGAAGAAATGAGTTTGCCAGGAAAATGGAAACCAAAAATGATAGGAGGAATTGGAGGTTTTATCAAAGTAAGACAGTATGATCAAATACTTATAGAAATTTGTGGAAAAAAGGCTATAGGTACAGTATTAATAGGACCTACACCTGTCAACATAATTGGAAGGAATATGTTGACTCAGCTTGGATGCACACTAAATTTTCCAATTAGTCCCATTGAAACTGTGCCAGTAAAATTAAAGCCAGGAATGGATGGCCCAAAGGTTAAACAATGGCCATTGACAGAAGAGAAAATAAAAGCATTAACAGCAATTTGTGAAGAAATGGAGAAAGAAGGAAAAATTACAAAAATTGGGCCTGAAAATCCATATAACACTCCAGTATTTGCCATAAAAAAGAAGGACAGTACTAAGTGGAGAAAGTTAGTAGATTTCAGGGAACTTAATAAAAGAACTCAAGACTTTTGGGAAGTTCAATTAGGAATACCACACCCAGCAGGGTTAAAAAAGAAAAAATCAGTGACAGTACTGGATGTGGGGGATGCATATTTTTCAGTTCCTTTAGATGAGGACTTCAGGAAATATACTGCATTCACCATACCTAGTATAAACAATGAAACACCAGGGATTAGATATCAATATAATGTGCTTCCACAGGGATGGAAAGGATCACCATCAATATTCCAGAGTAGCATGACAAAAATCTTAGAGCCCTTTAGAGCAAGAAATCCAGAAATAGTCATCTATCAATATATGGATGACTTGTATGTAGGATCTGACTTAGAAATAGGGCAACATAGAGCAAAAATAGAGGAGTTAAGAAAACATCTGTTAAGGTGGGGATTTACCACACCGGACAAGAAACATCAGAAAGAACCCCCATTTCTTTGGATGGGGTATGAACTCCATCCTGACAAATGGACAGTACAGCCTATAGAGTTGCCAGAAAAGGAAAGCTGGACTGTCAATGATATACAGAAGTTAGTGGGAAAATTAAATTGGGCCAGTCAGATTTACCCAGGAATTAAAGTAAGGCAACTTTGTAAACTCCTTAGGGGGACCAAAGCACTAACAGATATAGTACCACTAACTGAAGAAGCAGAATTAGAATTGGCAGAGAACAGGGAAATTCTAAGAGAACCAGTACATGGAGTATATTATGACCCATCAAAAGACTTGGTAGCTGAAATACAGAAACAGGGGCATGACCAATGGACATATCAAATTTACCAAGAACCATTCAAAAACCTGAAAACAGGGAAGTATGCAAAAATGAGGACTGCCCACACTAATGATGTAAAACAGTTAACAGAGGCAGTGCAAAAAATAGCTATGGAAAGCATAGTAATATGGGGAAAGACTCCTAAATTTAGACTACCCATCCAAAAAGAAACATGGGAGACATGGTGGACAGACTATTGGCAAGCCACCTGGATTCCTGAGTGGGAGTTTGTTAATACCCCTCCCTTAGTAAAATTATGGTACCAGCTAGAGAAAGAACCCATAATAGGAGCAGAAACTTTCTATGTAGATGGAGCAGCTAATAGGGAAACTAAAATAGGAAAAGCAGGGTATGTTACTGACAGAGGAAGGCAGAAAATTGTTTCTCTAACAGAAACAACAAATCAGAAGACTGAATTACAAGCAATTCAGCTAGCTTTGCAAGATTCAGGATCAGAAGTAAACATAGTAACAGACTCACAGTATGCATTAGGAATCATTCAAGCACAGCCAGATAAGAGTGAATCAGAGTTAGTCAACCAAATAATAGAACAATTAATAAAAAAGGAAAAGGTCTACCTGTCATGGGTACCAGCACATAAAGGAATTGGAGGAAATGAACAAATAGATAAATTAGTAAGTAAGGGAATCAGGAAAGTGCTGTTTCTAGATGGAATAGATAAGGCTCAAGAAGAGCATGAAAAATATCACAGCAATTGGAGAGCAATGGCTAGTGAGTTTAATCTACCACCCATAGTAGCAAAAGAAATAGTAGCTAGCTGTGATAAGTGTCAGCTAAAAGGAGAAGCCATACATGGACAAGTAGACTGTAGTCCAGGAATATGGCAATTAGATTGTACACATTTAGAAGGAAAAATCATCCTGGTAGCAGTCCATGTAGCCAGTGGCTACATAGAAGCAGAAGTTATCCCAGCAGAAACAGGACAAGAAACAGCATACTATATACTAAAGTTAGCAGGAAGATGGCCAGTCAAAGTAATACATACAGACAATGGCAGTAATTTCACCAGTGCTGCAGTTAAGGCAGCCTGTTGGTGGGCAGGTATCCAACAGGAATTTGGGATTCCCTACAATCCCCAAAGTCAGGGAGTAGTAGAATCCATGAATAAAGAATTAAAGAAAATCATAGGGCAGGTAAGAGATCAAGCTGAGCACCTTAAGACAGCAGTACAAATGGCAGTATTCATTCACAATTTTAAAAGAAAAGGGGGGATTGGGGGGTATAGTGCAGGGGAAAGAATAATAGACATAATAGCAACAGACATACAAACTAAAGAATTACAAAAACAAATTACAAAAATTCAAAATTTTCGGGTTTATTACAGAGACAGCAGAGACCCTATTTGGAAAGGACCAGCCAAACTACTCTGGAAAGGTGAAGGAGCAGTAGTAATACAAGATAATAGTGACATAAAGGTAGTACCAAGGAGGAAAGTAAAAATCATTAGGGACTATGGAAAACAGATGGCAGGCGCTGATTGTGTGGCAGGTAGACAGGATGAGGATTAGAACATGGAATAGTTTAGTAAAGCACCATATGTATGTTTCAAAGAGAACTAATGGATGGTTTTACAGACATCATTTTGAAAGTAGACATCCAAAAGTAAGTTCAGAAGTACACATCCCATTAGGGGAGGCTAGATTAGTAATAATAACATATTGGGGGTTGCAAACAGGAGAAAGAGAGTGGCATTTGGGTCATGGAGTCTCCATAGAATGGAGATTGAGAAGATATAGCACACAAGTAGACCCTGGCCTGGCAGACCAGCTAATCCATATGTATTATTTTGATTGTTTTGCAGAATCTGCCATAAGAAAAGCCATATTAGGACACATAGTTATTCCTAGGTGTAACTATCAAGCAGGACATAATAAGGTAGGATCTCTACAATACTTGGCACTGACAGCATTGATAAAACCAAAACAGATAAAGCCACCTCTGCCTAGTGTTAGGAAATTAGTAGAAGACAGATGGAACAAGCCCCAGAAGACCAGGGGCCGCAGAGGGAACCGTACAATGAATGGGCACTAGAGATTTTAGAGGAACTCAAGCAGGAAGCTGTCAGACACTTTCCTCGACCATGGCTCCATAGCTTAGGACAATATATCTATGAAACCTATGGGGATACCTGGACAGGAGTAGAAGCTATAATAAGAATATTGCAACAACTACTGTTTATTCATTTCAGAATTGGGTGCTTGCATAGCAGAATAGGCATTATGCGGCAAAGAAGAGCAAGAAATGGAGCCAGTAGATCCTAAACTAGAGCCCTGGAACCATCCAGGAAGTCAACCTAAAACTCCTTGTACTAAGTGTTTCTGTAAAGGATGTAGCTATCATTGTCTAGTTTGCTTTCAGACAAAAGGCTTAGGCATTTCCTATGGCAGGAAGAAGCGAGGACAGCGACGAAGCGCTCCTCCACGCAGTGAGGATCATCAAAATCTTATATCAAAGCAGTAAGTATATGTCATGGTAAATTTCTTAGCAGCAAAAGTAGATTATAGATTAGGAGTAGGAGCATTGATAGTAGCACTAATCATAGCAATAGTTGTGTGGAGCATAGTATATATAGAATATAAGAAAATGTTAAAACAAAAGAAAATAGACTGGTTAATTAAAAGAATTAGGGAAAGAGCAGAAGACAGTGGCAATGAGAGTGAGGGGGATACTGAGGAGTTGGCAACAATGGTGGATATGGGGCATCTTAGGCTTTTGGATTTGTAGTGGGTTAGGGAACTTGTGGGTCACAGTCTATTATGGGGTACCTGTGTGGAGAGAAGCAAGCACTACTCTATTCTGTGCATCAGATGCTAAAGCATATGAGAAAGAAGTGCATAATGTCTGGGCTACACATGCCTGTGTACCCACAGACCCCAACCCACAAGAAATAGAGCTGGACAATGTAACAGAAAATTTTAACATGTGGAAAAATGACATGGTGGATCAGATGCATGAGGATATAATCAGTTTATGGGATCAAAGCCTAAAGCCATGTGTAAAGTTGACCCCACTCTGTGTCACTTTAAAATGTACAAACTACAGTACAAACTACAGTAATACCATGAATGCTACTAGCTATAACAATAATACCACTGGAGAAATAAAAAATTGCACTTTCAATATGACCACAGAACTAAGAGATAAGAAACAGCAAGTGTATGCACTTTTTTATAAACTTGATATAGTACCACTTAATAGCAACTCTAGTGAGTATAGATTAATAAATTGTAATACCTCAGCCATAACACAAGCCTGTCCAAAGGTCTCTTTTGACCCAATTCCTATACATTATTGTGCTCCAGCTGGTTATGCGATTCTAAAGTGTAAAAACAATACATTCAATGGGACAGGACCATGCCAGAATGTCAGCACAGTACAATGTACACATGGAATTAAGCCAGTGGTATCAACTCAACTACTGTTAAATGGTAGCCTAGCAGAAGGAGGAGAGATAATAATTAGATCTAAAAACCTGTCAAATAATGCCTACACAATAATAGTACATCTTAATGACTCTGTAGAAATTGTGTGTACAAGACCTAACAATAATACAAGAAAAGGTATAAGGATAGGACCAGGACAAACATTCTATGCAACAGAAAACATAATAGGAGACATAAGACAAGCACATTGTAACATTAGTGCAGGTGAATGGAATAAAGCTGTACAAAGGGTAAGTGCAAAGTTAAGAGAACACTTCCCTAATAAAACAATAGAATTTCAACCATCCTCAGGAGGGGACCTAGAAATTACAACACATAGCTTTAATTGTAGAGGAGAATTTTTCTATTGCAATACATCAAAACTGTTTAATAGCAGTTATAATGGTACCAGTTATAGGGGTACAGAAAGTAATAGTTCAATCATCACACTCCCATGCAGAATAAAACAAATTATAAACATGTGGCAGAAGGTAGGACGAGCAATATATGCCCCTCCCATCGAAGGGAACATAACATGTAGCTCGAGTATCACAGGACTACTCTTGGCACGTGATGGAGGCTTAGATAATATCACCACAGAGATATTCAGACCACAAGGAGGAGATATGAAGGACAATTGGAGAAATGAATTATATAAATATAAAGTAGTAGAAATTAAGCCATTGGGAGTAGCGCCCACTGAGGCAAAAAGGAGAGTGGTGGAGAGAGAAAAACGAGCAGTGGGAATAGGAGCTGTGATCTTTGGGTTCTTGGGAGCAGCAGGAAGCACTATGGGCGCAGCGTCAATAACGCTGACGGCACAGGCCAGACAATTGTTGTCTGGAATAGTGCAACAGCAAAGCAATTTGCTGAGGGCTATAGAGGCGCAACAGCATATGTTGCAACTCACAGTCTGGGGCATTAAGCAGCTCCAGGCAAGAGTCTTGGCTATAGAAAGATACCTAAAGGATCAACAGCTCCTAGGGATTTGGGGCTGCTCTGGGAAACTCATCTGCACCACTACTGTGCCTTGGAACTCCAGTTGGAGTAATAAAACTCAAGGAGAGATTTGGGAAAACATGACCTGGATGCAGTGGGATAAAGAAATTAGTAATTACACAGGGATAATATACAGGTTGCTTGAAGAATCACAAAACCAGCAGGAACAAAATGAAAAGGATTTATTAGCATTGGACAGTTGGAACAATCTGTGGAGTTGGTTTAACATATCAAATTGGCTGTGGTATATAAAAATATTCATAATGATAGTAGGAGGCTTGATAGGCTTGAGAATAATTTTTGCTGTGCTCTCTATAGTGAATAGAGTTAGGCAGGGATACTCACCTTTATCGTTTCAGACCCTTACCCCGAACCCAAGGGGACTCGACAGGCTCGGAAGAATCGAAGAAGAAGGTGGAGAGCAAGACAGAGACAGATCGATTCGATTAGTACAAGGATTCTTAGCACTTGCCTGGGACGACCTGAGGAGCCTGTGCCTTTTCAGCTACCACCGATTGAGAGACTTAATATTGGTGACAGCGAGAGTGGTGGAACTTCTGGGACGCAGCAGTCTCAGGGGACTACAGAGGGGGTGGGAAGCCCTTAAGTATCTGGGAAGTCTTGTGCAGTATTGGGGTCTGGAACTAAAAAAGAGTGCTACTAGTCTGTTAGATTCCATAGCAATAGCAGTGGCTGAAGGAACGGATAGGATTATAGAAGTAATACAAAGAATTTATAGAGCTTTTTGCAATATACCTAGAAGAGTAAGACAGGGCTTTGAAGCAGCTTTGCAATAAAATGGGGGGCAAGTGGTCAAAAAGCAGTATAGTTGGATGGCCTGCTGTAAGAGAAAGAATAAGAAGAACTGAGCCAGCAGCAGAGGGGGTAGGAGCAGCGTCTCAAGACTTAGATAAATATGGAGCATTTACAAGCAGCAACACAGCCTCCAATAATGCTGATTGTGCCTGGCTAGAAGCACAAGAGGAGGCAGATGAAGTAGGCTTTCCAGTCAGACCTCAGGTGCCTTTAAGACCAATGGCTTATAAGGGAGCAGTAGATCTCAGCTTCTTTTTAAAAGAAAAGGGGGGACTGGATGGGTTAATTTACTCCCCGAAAAGGCAAGAAATCCTTGATTTGTGGGTCTATCACACACAAGGCTTCTTCCCTGATTGGCACAACTACACACCGGGACCAGGGGTCAGATATCCACTGACCTTTGGATGGTGCTACAAGCTAGTGCCAGTTGACCCAAGGGAAGTAGAAGAGAACAACCAAGGAGAGAACCACTGTTTGCTACACCCTATGAGCCAGCATGGAATGGATAATCCAGATAAAGAAGTATTAATGTGGAAGTTTGACAGTCACCTAGCACGCAGACACATGGCCCGCGAGCTACATCCGGAATATTACAAAGACTGCTGACACAGAAGGGACTTTCCGCTGGGACTTTCCACTAGGGCGTTCCAGGAGGTGTGGTCTGGGCGGGACGGGGAGTGGTTAACCCTCAGATGCTGCATATAAGCAGCTGCTTTTT
>C.ZA.99.99ZACM9_AF411967_F1.BR.89.BZ163_AY173958
TGGAAGGGTTAATTTACTCCAAGCAAAGGCAAGATATCCTTGATTTGTGGGTCTATAACACACAAGGCTACTTCCCAGATTGGCAAAACTACACACCAGGACCAGGGGTCAGATATCCACTGACCTTTGGATGGTGCTTCAAGCTGGTGCCAGTCGATCCAAAGGAAGTAGAAGAGGCCAATGAAGGAGAAAATAACTGTTTACTACACCCTATGAGCCTGCATGGAATGGAGGATGAGCACGGAGAAGTACTAAGATGGAAGTTTGACAGTATGCTAGCACGCAGACACATGGCCCGCGAGCTACATCCGGAGTATTACAAAGACTGCTGACACAGAAGGGACTTTCCGCTGGGACTTTCCACTGGGGCGTTCCAGGAGGTGTGGTCTGGGCGGGACCGGGGAGTGGCCAGCCCTCAGATGCTGCATATAAGCAGCTGCTTTTCGCCTGTACTGGGTCTCTCTAGGTAGACCAGATCTGAGCCCGGGAGCTCTCTGGCTATCTAGGGAACCCACTGCTTAAGCCTCAATAAAGCTTGCCTTGAGTGCTCTAAGTAGTGTGTGCCCGTCTGTTGTGTGACTCTGGTAACTAGAGATCCCTCAGACCCTTTTTGGTAGTGTGGAAAATCTCTAGCAGTGGCGCCCGAACAGGGACTTGAAAGCGAAAGTAAGACCAGAGCAGATCTCTCGACGCAGGACTCGGCTTGCTGAAGTGCACTCGGCAAGAGGCGAGAGCGGCGACTGGTGAGTACGCCGAATTTTATTTGACTAGCGGAGGCTAGAAGGAGAGAGATGGGTGCGAGAGCGTCAATATTAAGAGGGGGGAAATTAGATGCATGGGAAAAAATTAGGTTAAGGCCAGGGGGAAAGAAACAATATAGGATAAAACACCTAGTATGGGCAAGCAGGGAGCTGGAAAAATTTGCACTTAACCCTGGTCTTTTAGAAACTTCAGAAGGCTGTAAACAAATAATACAACAGCTACACCCAGCTCTTAAGACAGGAACAGAGGAACTTAGATCATTATATAACACAGTAGCAACTCTCTATTGTGTACATGAAAGGATAGAGGTACGAGACACCAAGGAAGCCTTAGATAAGATAGAGGAAGAACAAAACAAAAGTCAGCAAAAAACACAGCAGGCAAAAGAGGCTAATGGTAACGGGAAGATCAGTCAAAATTATCCAGTAGTGCAGAACCTCCAAGGGCAAATGGTACACCAGGCCATATCACCAAGGACTTTAAATGCATGGGTAAAAGTAGTAGAGGAGAAGGCGTTCAGCCCGGAGGTAATACCCATGTTTACAGCATTATCAGAAGGAGCCACCCCCTCAGATTTAAACACCATGTTAAATACAGTGGGGGGACATCAAGCAGCCATGCAAATGTTAAAGGATACCATCAATGAGGAGGCTGCAGAATGGGATAGGTTACATCCAGTGCATGCAGGGCCTATTGCACCAGGCCAAATGAGAGAACCAAGGGGTAGTGACATAGCAGGAACTACTAGTACCCTTCAGGAACAAATAGCATGGATGACAAGCAACCCACCTATTCCAGTGGGAGACATCTATAAAAGATGGATAATTCTGGGTTTAAATAAAATAGTAAGAATGTATAGCCCTGTCAGCATTTTGGACATAAAACAAGGGCCAAAAGAACCCTTTAGAGACTATGTAGACCGATTCTTTAAAACTTTAAGAGCTGAACAATCTACACAAGAGGTAAAAAATTGGATGACAGATACCTTGTTGGTTCAAAATGCGAACCCAGACTGTAAGACCATTTTAAGAGCATTAGGACCAGGGGCTACATTAGAAGAAATGATGACAGCATGTCAGGGAGTGGGAGGACCTGGCCACAAAGCAAGAGTCTTGGCTGAGGCAATGAGCCAAGCAAGCAAAGTGAACATAACGATGCAGAGAAGCAATTTTAAGGGCCATAAAAGAACTGTTAAATGTTTCAACTGTGGCAAGGAAGGGCACATAGCCAGAAATTGCAGGGCCCCTAGGAAAAAAGGCTGTTGGAAATGTGGAAAGGAAGGACACCAAATGAAAGATTGTACTGAAAGGCAGGCTAATTTTTTAGGGAAAATTTGGCCTTCCCACAAGGGGAGGCCAGGGAATTTCCTTCAGAGCAGACCAGAGCCAACAGCCCCACCAGCAGAGAGCTTCAGGTTCGAGGGGACAACTCCTGCTCCGAAGCGGGAGCTGAAAGACGAGGAACCACCCTTAACTTCCCTCAAATCACTCTTTGGCAGCGACCCCTTGTCTCAATAAAAGTAGGGGGTCAGATAAAGGAGGCTCTCTTAGACACAGGAGCAGATGACACAGTATTAGAAGAAATAAATTTGCCAGGAAAATGGAAACCAAAAATGATAGGAGGAATTGGAGGTTTTATCAAAGTAAGACAGTATGATCAAATACTTATAGAAATTTGTGGAAAAAAGGCTATAGGTGCAGTATTGGTAGGACCTACGCCTGTCAACATAATTGGAAGGAACATGTTGACTCAGATTGGTTGTACTTTAAATTTTCCAATTAGTCCTATTGAAACTGTACCAGTAAAACTGAAGCCAGGAATGGATGGCCCAAAGGTTAAACAATGGCCATTGACAGAAGAAAAAATAAAAGCATTAACAGCAATTTGTGAAGAAATGGAGAAGGAAGGAAAAATTACAAAAATTGGGCCTGAAAATCCATATAACACTCCAGTATTTGCCATAAAAAAGAAGGACAGTACCAAGTGGAGAAAATTAGTAGATTTCAGGGAACTCAATAAAAGAACTCAAGACTTTTGGGAAGTCCAATTAGGAATACCACACCCAGCAGGGTTAAAAAAGAAAAAATCAGTGACAGTACTGGATGTGGGGGATGCATATTTTTCAGTTCCTTTAGATGAAAACTTCAGGAAATATACTGCATTCACCATACCTAGTATAAACAATGAAACACCAGGGATTAGATATCAATATAATGTGCTTCCACAGGGATGGAAAGGATCACCAGCAATATTTCAGAGTAGCATGACAAAAATCTTAGAGCCCTTTAGGACACAAAATCCAGACATAGTTATTTATCAATATATGGATGACTTGTATGTAGGATCTGATTTAGAAATAAAGCAACATAGAGCAAAAATAGAGGAGTTAAGAGAACATCTATTAAAGTGGGGATTTACCACACCAGACAAGAAACATCAGAAAGAACCCCCATTTCTTTGGATGGGGTATGAACTCCATCCTGACAAATGGACAGTACAGCCTATACAACTGCCAGAAAAGGATAGCTGGACTGTCAATGATATACAGAAGTTAGTGGGAAAATTAAACTGGGCAAGTCAGATTTACCATGGGATTAAAGTAAGGCAACTTTGCAAACTCCTTAGGGGGGTCAAAGCACTAACAGACATAGTACCACTAACTGAAGAAGCAGAATTAGAATTGGCAGAGAACAGGGAAATTCTAAAAGAACCAGTACATGGAGTATATTATGACCCATCAAAAGACTTAATAGCAGAAATACAGAAACAGGGAAATGACCAATGGACATATCAAATTTACCAAGAACCATTCAAAAATCTGAAAACAGGAAAGTATGCAAAAATGAGGACTGCCCACACTAATGATGTAAAGCAGTTAACAGAGGCAGTACAAAAAATAGCCATGGAAAGCATAGTAATATGGGGAAAGACTCCTAAATTCAGACTACCCATCCAAAAAGAAACATGGGAGACATGGTGGACAGACTATTGGCAAGCCACCTGGATTCCTGAGTGGGAGTTTGTTAATACCCCTCCCCTAGTAAAATTATGGTACCAACTGGAAAAAGATCCAATAGCAGGGGTAGAAACTTTCTATGTAGATGGAGCAGCTAATAGGGAAACTAAAAAGGGAAAAGCAGGGTATGTTACTGACAAAGGAAGACAGAAAATTGTTTCTCTAACTGAAACAACAAATCAGAAGGCTGAGTTACAAGCAATTCAGCTAGCTCTGCAGGATTCAGGACCAGAAGTAAACATAGTAACAGACTCACAGTATGCATTAGGAATCATTCAAGCACAACCAGATAAGAGTGAATCAGAGTTGGTTAATCAAATAATAGAACAGTTAATAAACAAGGAAAGAATCTACCTGTCATGGGTACCAGCACATAAAGGAATTGGAGGAAATGAACAAGTGGACAAATTAGTAAGTAGTGGAATCAGGAAAGTGCTGTTTCTAGATGGGATAGATAAGGCTCAAGAAGAGCATGAAAAATATCACAGCAATTGGAGAGCAATGGCTAGTGAGTTTAATCTGCCACCCATAGTAGCAAAAGAAATAGTAGCTAGCTGTGATAAATGTCAACTAAAAGGGGAAGCCATGCATGGACAAGTAGACTGTAGTCCAGGGATATGGCAATTAGACTGTACACATTTAGAAGGAAAAATCATCCTGGTAGCAGTCCATGTAGCCAGTGGCTACGTAGAAGCAGAGGTTATCCCAGCAGAAACAGGACAAGAAACAGCATACTATATACTAAAGTTAGCAGGAAGATGGCCAGTCAAAGTAATACATACAGACAATGGCAGCAATTTCACCAGTACTGCAGTTAAGGCAGCCTGTTGGTGGGCAGGTATCCAACAGGAATTTGGAATTCCCTACAATCCTCAAAGCCAGGGAGTAGTAGAATCCATGAATAAAGAATTAAAGAAAATCATAGGGCAAGTAAGAGATCAAGCTGAGCACCTTAAGACAGCAGTACAAATGGCAGTATTCATTCACAATTTTAAAAGAAAAGGGGGGATTGGGGGATACAGTGCAGGGGAGAGAATAATAGACATAATAGCAACAGACATACAAACTAAAGAATTACAAAAACAAATTATAAAAATTCAAAATTTTCGGGTTTATTACAGAGACAGCAGAGACCCTATTTGGAAAGGACCAGCCAAACTACTCTGGAAAGGTGAAGGGGCAGTAGTAATACAAGATAATAGTGACATAAAGGTAGTACCAAGGAGGAAAGTAAAAATTATTAGGGACTATGGAAAACAGATGGCAGGTGATGATTGTGTGGCAGGTAGACAGGATGAGGATTAGAACATGGAATAGTTTAGTAAAACACCATATGTATGTTTCAAAGAAAGCTAATGGATGGTTCTACAGACATCATTATGAAAGCAGACATCCAAGAGTAAGTTCAGAAGTACACATTCCATTAGGGGAGGCTAGATTAGTGATAAAAACATATTGGGGTTTGCAGACAGGAGAAAGAGCTTGGCAATTGGGTCATGGAGTCTCCATAGAATGGAGATTGAGAAGATATAGCACACAAGTAGACCCTGGCCTGGCAGACCAACTAATTCATATGCATTATTTTGATTGTTTTGCAGACTCTGCCATAAGAAAAGCCATATTAGGACATATAGTTAGCCCTAGATGTGAATATCAAGCAGGACATAACAAGGTAGGATCTCTACAGTACTTGGCACTGACAGCATTGATAAAACCAAAAAAGAGAAAGCCACCTCTGCCTAGTGTTAGGAAATTAGTAGAGGACAGATGGAACAAGCCCCAGAAGACCAGGGGCCGCAGAGGGAACCATACAATGAATGGACATTAGAGATACTAGAGGAACTCAAGCAGGAAGCTGTCAGACACTTTCCTAGACCATGGCTTCATGGCTTAGGACAACATATCTATGAAACCTATGGGGATACTTGGACAGGAGTCGAAGTGATAATAAGAGTTCTGCAACAATTACTGTTCATTCATTTCAGAATTGGGTGCCAGCATAGCAGAATAGGCATTTTGCGACAGAGAAGAGCAAGAAATGGAGCCAATAGATCCTAATTTAGAACCTTGGAACCATCCAGGAAGTCAGCCTAAAACTGCTTGTAATAGGTGTTATTGCAAACGCTGCTGCTACCATTGTCTAGTTTGCTTTCAGACAAAAGGCTTAGGCATTTCCTATGGCAGGAAGAAGCGGAGACAGCGACGAAGCGCTCCTCCAAGCAGTGAAGATCATCAAAATCTTATATCAAAGCAGTAAGTACTAAATAGTATATGTAATGTTAAACTTAAATGCAAGAATAGATTATAGATTAGGAGTAGGAGCATTGATAGTAGCACTAATCATAGCAATAGTTGTGTGGACCATAGTATATATAGAATATAGGAAATTGTTAAGACAAAGAAAAATAGACCGTTTAATTAAAAGAATTAGGGAAAGAGCAGAAGACAGCGGCAATGAGAGTGAGGGAGATACTGAGGAATTATCAACAATGGTGGATATGGAGCATCTTAGGCTTTTGGATGATTTGTAATGTGGTGGGAAACTTGTGGGTCACAGTCTATTATGGGGTACCTGTGTGGAAAGAAGCAAAAACTACTCTATTCTGTGCATCAGATGCTAAAGCATATGAGAAAGAAGTGCATAATGTCTGGGCTACACATGCCTGTGTACCCACAGACCCCAACCCACAAGAAATGCATTTGGAAAATGTAACAGAAAATTTTAATATGTGGAAAAATGACATGGTGGATCAGATGCATGAGGATATAATCAGTTTATGGGACCAAAGCCTAAAACCATGTGTAAAGTTGACCCCACTCTGTGTCACTTTAGAATGTACAAATGCTACCTTTAATAGTACTACCCATAATAATGCTACCTATAATGATACCATAGCTGGAGAAATGAAAAATTGCTCTTTCAATGTAACCACAGAACTAAGAGATAGGAAAAAGAAAGAGTATGCACTTTTTTATAGACTTGATATAGTACCACTTGGGGGCAACTCTAGTAAGGGCAACGCTAGTAAGTATAGATTAATAAATTGTAATTCCTCAACCATAACACAAGCCTGTCCAAAGGTCTCTTTTGATCCAATTCCTATACATTATTGTGCTCCAGCTGGTTATGCGATTCTAAAGTGTAATAATAAGACATTCAATGGGACAGGACCATGCAATAATGTCAGCACAGTACAATGTACACATGGAATTAAGCCAGTGGTATCAACTCAACTACTGTTAAATGGTAGCCTAGCAGAAGAAGAAATAATAATTAGATCTGAAAATTTGACAGACAATGTCAAAACAATAATAGTACATCTTAATGAATCTGTACCGATTGTATGTGCAAGACCAGGCAATAATACAATAAAAAGGATAAGAATAGGACCAAGATACGCATTCTATGCAAAAGAAACTATAATAGGAGACATAAGACAAGCACATTGTAACATTAGTGAAGAGAAATGGAACAAAACGTTACAACAGGTAGGGAAAAAATTAAAAGAACATTTCCCTAATAAAACAATTACATTTGCACCACACTCAGGAGGGGATCTAGAAATTATAACACATAGCTTCAATTGTAGAGGAGAATTTTTCTATTGCAATACATCAAAACTGTTTAATAGGCCTAATGGTACAGAGAGTAATTCAAACCAAACCACAGAGAGTAATTCAAACAGAACCATCACACTCCAATGCAGAATAAGACAAATTATAAACATGTGGCAGGAGGTAGGACAAGCAATGTATGCCCCTCCCATTAAAGGAAACATAACATGTACCTCAAATATCACAGGACTACTATTGACACGAGATGGAGGAGAGAAAAATACAACAAATGAAAAAGAGATATTCAGACCTGGAGGAGGAGATATGAGGGACAATTGGAGAAGTGAATTATACAAATATAAAGTGGTAGAAATTAAGCCATTGGGAATAGCACCCACTGGGGCAAAAAGGAGAGTGGTGGAGAGAGAAAAAAGAGCTGTGGGACTACTAGGAGCTGTGTTCCTTGGGTTCTTGGGAGCAGCAGGAAGCACTATGGGCGCGGCGTCAATAGCGCTGACGGTACAGACTAGACAATTGTTGTCTGGTATAGTGCAACAGCAAAGTAATTTGCTGAGGGCTATAGAGGCGCAACAGCATATGTTGCAACTCACGGTCTGGGGCATTAAGCAGCTCCAGACAAGAGTCCTGTCTATAGAAAGATACCTAAGGGATCAACAGCTCCTAGGGCTTTGGGGCTGCTCTGGAAAACGCATCTGCACCACTGCTGTGCCTTGGAACTCCAGTTGGAGCAATAGATCTAAGGAAGAGATTTGGGACAATATGACCTGGATGCAGTGGGATAGAGAAATTAGTAATTACACAGACATAATATACAACTTGCTTGAAGAATCGCAAAACCAGCAGGAAGAGAATGAAAAAGAATTACTAGAATTGGACAGTTGGAAAAACTTGTGGAGTTGGTTTGACATAACACAGTGGCTGTGGTATATAAAAATATTCATAATGATAATAGGAGGCTTAATAGGCTTAAGAATAATTTTTGCTGTGCTCTCTATAGTAAATAGAGTTAGGCAGGGATACTCACCTTTGTCGTTTCAGACCCTTATCCCAACCTCGAGGGGTCCACCCGACAGACTCGAAAGAATCGAAGAAGAAGGTGGAGAGCAAGACAAAGACAGATCCGTGAGATTAGTGAGCGGATTCTTGCCACTTATCTGGGACGATCTGCGGAGCCTGTGCCTTTTCAGCTACCACCGATTGAGAGACTTCATATTAATTGTAGTGAGGGCAGTGGAACTTCTGGGACGCAGGGGGTGGGAAATCCTTAAGTATCTGGGAAGTCTTGTGCAATATTGGGGGCTAGAGCTAAAAAGGAGTGCTATTAGTCTGCTTGATACCATAGCAATAGCAGTAGCTGAAGGAACAGATAGGATTATAGAATTCATACAAAGACTTGGTAGAGCTATCTACCACATACCTAGAAGAATAAGACAAGGCTTTGAAGTAGCTTTGCAATAAAATGGGGGGCAAGTGGTCAAAAAGCAGTATAGTTGGATGGCCTGCTATAAGACAGGCTATGAGACGTACTGATCCAGCAGCAAGACATACTGAGCCAGCAGCAGAGGGAGTAGGAGCAGCGTCTCAAGACTTGGCTAAACATGGGGCACTTACAACTAGCAACACAGCAAGCAACAATGCTGCTTGTGCCTGGCTGGAGGCACAAGAGGAGGGAGAAGAAGTAGGCTTTCCAGTCAGACCTCAGGTACCTTTAAGACCAATGACTTATAAGAGAGCATTTGATCTCAGCTTCTTTTTAAAAGAAAAGGGGGGACTGGAAGGGTTAATTTACTCCAAGCAAAGGCAAGATATCCTTGATTTGTGGGTCTATAACACACAAGGCTACTTCCCAGATTGGCAAAACTACACACCAGGACCAGGGGTCAGATATCCACTGACCTTTGGATGGTGCTTCAAGCTGGTGCCAGTCGATCCAAAGGAAGTAGAAGAGGCCAATGAAGGAGAAAATAACTGTTTACTACACCCTATGAGCCTGCATGGAATGGAGGATGAGCACGGAGAAGTACTAAGATGGAAGTTTGACAGTATGCTAGCACGCAGACACATGGCCCGCGAGCTACATCCGGAGTATTACAAAGACTGCTGACACAGAAGGGACTTTCCGCTGGGACTTTCCACTGGGGCGTTCCAGGAGGTGTGGTCTGGGCGGGACCGGGGAGTGGCCAGCCCTCAGATGCTGCATATAAGCAGCTGCTTTTCGCCTGTACTGGGTCTCTCTAGGTAGACCAGATCTGAGCCCGGGAGCTCTCTGGCTATCTAGGGAACCCACTGCTTAAGCCTCAATAAAGCTTGCCTTGAGTGCTCTAAGTAGTGTGTGCCCGTCTGTTGTGTGACTCTGGTAACTAGAGATCCCTCAGACCCTTTTTGGTAGTGTGGAAAATCTCTAGCA
>C.ZA.04.04ZAPS205B1_DQ093599_F2.CM.95.MP257_AJ249237
TCTGTTGTGTGACTCTGGTAACTAGAGATCCCTCAGACCCTTTTGGTAGTGTGGAAAATCTCTAGCAGTGGCGCCCGAACAGGGACTTGAAATCGAAAGTAAGACCAGAGAAGAACTCTCGACGCAGGGCTCGGCTTGCTGAAGTGCACTCGGCAAGAGGCGAGAGGGGCGACTGGTGAGTACGCCAATTTTTATTTGACTAGCGGAGGCTAGAAGGAGAGAGATGGGTGCGAGAGCGTCAGTATTAAAAGGCGAAAAATTAGATAGATGGGAAAAAATTAGGTTAAGGCCAGGGGGAAAGAAACACTATATGCTAAAACACATAGTATGGGCAAGCAGGGAGCTGGAAAGATTTGCACTTAACCCTGGCCTTTTAGAAACAGCAGAAGGCTGTAAACAAATAATAGGACAGCTACAACCAGCTTTTAAGACAGGAACAGAGGAACTTAGGTCATTATACAACACAGTAGCAACTCTCTATTGTGTACATAAAAAGATAGATGTACGAGACACCAAGGAAGCCTTAGACAAGATAGAGGAAGAACAAAACAAAAGTCAGCAAAAAACACAGCAGACAAACGCGGCTGACGGAAAGATCAGTCAAAATTATCCTATAGTGCAGAATCTACCAGGGCAAATGGTACATCAAGCCATATCACCTAGAACCTTGAATGCATGGGTAAAAGTAATAGAGGAGAAGGCTTTTAGCCCAGAGGTAATACCCATGTTTACAGCATTATCAGAAGGAGCCACCCCACAAGATTTAAACACCATGTTAAATACAGTGGGGGGACATCAAGCAGCCATGCAAATGTTAAAGGATACCATCAATGAGGAGGCTGCAGAATGGGACAGGATACATCCAGTACATGCAGGGCCTATTGCACCAGGCCAAATGAGAGAACCAAGGGGAAGTGACATAGCAGGAACTACTAGTACCCTTCAGGAACAAATAGCATGGATGACAAGTAACCCACCTGTTCCAGTGGGAGAAATCTATAAAAGATGGATAATTCTGGGGTTAAATAAAATAGTGAGAATGTATAGCCCTGTCAGCATTTTGGACATAAGACAAGGGCCAAAGGAACCCTTTAGAGACTATGTAGACCGGTTCTTTAAAACTTTAAGAGCTGAACAAGCTACACAAGATGTAAAAAATTGGATGACAGACACCTTGTTGGTCCAAAATGCGAACCCAGATTGTAAGACCATTTTAAGAGCATTAGGACCAGGGGCTACATTAGAAGAAATGATGACAGCATGTCAGGGAGTGGGAGGACCCGGCCACAAAGCAAGAGTATTGGCTGAGGCAATGAGCCAAGCAAACAGTAACATAATGATGCAGAGGGGCAATTTTAAAGGCCAAAGAAAAATTGTTAAATGTTTCAACTGTGGCAAGGAAGGACATATAGCTAGAAATTGCAGGGCCCCTAGAAAAAGGGGCTGCTGGAAATGTGGACAGGAAGGACACCAAATGAAAGACTGCACTGAGAGACAGGCTAATTTTTTAGGGAAAATGTGGCCTTCCAACAAGGGGAGGCCCGGAAATTTCCTTCAGAACAGATCAGAGCCAACAGCCCCACCAGCAGAGCCAACAGCCCCTCCAGCAGAGAGCTTCAGGTTCGAGGAAACAACCCCCGCTCCGAAGCAGGGGCCGAAAGACAGGGAGCCCTACAGGGAGCCCTTAACCTCCCTCAGATCACTCTTTGGCAACGACCTCTTGTCTCAATAAAAGTAGGGGGTCAGGTAAAGGAGGCTCTCTTAGACACAGGAGCAGATGATACAGTATTAGAAGACATAAATTTGCCAGGAAAATGGAAACCAAGAATGATAGGAGGAATTGGAGGTTTTATCAAAGTAAGACAATATGATCAAATAACTATAGAAATTTGTGGAAAAAAGGCTATAGGTTCAGTATTAGTAGGGCCTACACCTGTCAACATAATTGGAAGGAATATGTTGACTCAGCTTGGATGCACCCTAAATTTTCCAATTAGTCCCATTGAAACTGTACCAGTAAAACTAAAGCCAGGAATGGATGGCCCAAAGGTTAAACAATGGCCATTGACAGAAGAAAAAATAAAAGCATTAACAGCAATTTGTGATGAAATGGAGAAGGAAGGAAAGATTACAAAAATTGGGCCTGAAAATCCATATAACACTCCAATATTTGCCATAAAAAAGAAGGACAGTACTAAGTGGAGAAAATTAGTAGATTTCAGGGAACTCAATAAAAGAACTCAAGACTTTTGGGAGGTTCAATTAGGAATACCACACCCAGCAGGGTTAAAAAAGAAAAGATCAGTGACAGTACTGGACGTGGGGGATGCATATTTTTCAGTTCCTTTAGATGAAAGCTTCAGGAAATATACTGCATTCACCATACCTAGTATAAACAATGAAACACCAGGGATTAGATATCAATATAATGTGCTTCCACAGGGATGGAAAGGATCACCAGCAATATTCCAGAGTAGCATGACAAAAATCCTAGAGCCCTTTAGGGCACAAAACCCAGAAATAGTCATCTATCAATATATGGATGACTTGTATGTAGGATCTGACTTAGAGATAGGGCAACATAGAGCAAAGATAGAGGAGTTAAGAGCACATCTATTAAAGTGGGGATTTACCACACCAGACAAGAAGCATCAGAAAGAACCCCCATTTCTTTGGATGGGGTATGAACTCCATCCTGACAAATGGACAGTACAGCCTATACAACTGCCAGAAAAGGATAGCTGGACTGTCAATGATATACAGAAGTTAGTGGGAAAATTAAACTGGGCAAGTCAGATTTACCCAGGGATTAAAGTAAGGCAACTTTGTAAACTCCTTAGGGGGGCCAAAGCACTAACAGACATAGTACCACTAACTGAAGAAGCAGAATTAGAATTAGCAGAGAACAGGGAGATTCTAAAAGAACCAGTACATGGAGTATATTATGACCCATCAAAAGACTTGATAGCTGAACTACAGAAACAGGGGCATGACCAGTGGACATATCAAATTTACCAAGAACCATTCAAAAATCTGAAAACAGGGAAGTATGCAAAAATGAGGACTGCCCACACTAATGATGTAAAACAGTTGACAGAGGCAGTGCAGAAAATAGCTGTGGAAAGCATAGTAATATGGGGGAAGACCCCTAAATTTAGACTACCCATCCAAAAAGAAACATGGGAGACATGGTGGACAGACTATTGGCAAGCCACCTGGATTCCTGAGTGGGAATTTGTTAACACCCCTCCCCTAGTAAAATTATGGTACCAGCTGGAGAAAGAGCCCATAGCAGGAGCAGAAACCTTCTATGTAGATGGAGCAGCTAATAGGGATTCTAAGATAGGAAAAGCAGGGTATGTTACTGACAGAGGAAGGCAGAAAATTATTTCTCTAACTGAAACAACAAATCAGAAGACTGAATTACAAGCAATTCAGCTAGCTTTGCAAGATTCAGGATCAGAAGTAAACATAGTAACAGATTCACAGTATGCATTAGGAATCATTCAAGCCCAGCCAGATAAGAGTGAATCAGAATTAGTCAATCAAATAATAGAGCAATTAATAAACAAGGAAAGGGTCTACCTGTCATGGGTACCAGCACACAAAGGAATTGGAGGAAATGAACAAGTAGATAAATTAGTAAGTAGAGGAATCAGAAAAGTGCTGTTTCTAGATGGAATAGATAAGGCTCAAGAAGAACATGAGAAATATCACAACAATTGGAGAGCAATGGCTAGTGACTTTAATCTACCACCCATAGTAGCAAAAGAAATAGTAGCTAGCTGTGATAAATGTCAGCTAAGGGGGGAGGCTATACATGGACAAGTAGACTGTAGTCCAGGGATATGGCAATTAGATTGTACACATTTAGAAGGAAAAGTCATCATGGTAGCAGTCCATGTAGCCAGTGGCTACATAGAAGCAGAGGTTATCCCAGCAGAAACAGGACAAGAAACAGCATACTTTATACTAAAATTAGCAGGAAGATGGCCAGTCAAAGTAATACATACAGACAATGGCAGTAATTTCACCAGTGCTACAGTCAAGGCAGCCTGTTGGTGGGCAGGTATCCAACAAGAATTTGGAATTCCCTACAATCCCCAAAGTCAGGGAGTAGTAGAATCCATGAATAAAGAATTAAAGAAAATTATAGGGCAGGTAAGAGATCAAGCTGAGCACCTTAAGACAGCAGTACAAATGGCAGTATTCATTCACAATTTTAAAAGAAAAGGGGGGATTGGGGGGTACAGTGCAGGGGAAAGAATAGTAGACATAATAGCAACAGACATACAAACCAGAGAACTACAAAAACAAATTATAAAAATTCAAAATTTTCGGGTTTATTACAGAGACAGCAGAGACCCTATTTGGAAAGGACCAGCCAAACTCCTCTGGAAAGGTGAAGGGGCAGTAGTAATACAAGATAACAGTGACATAAAGGTAGTACCAAGGAGGAAAGTAAAAATCATTAGGGATTATGGAAAACAGATGGCAGGGGCTGATTGTGTGGCAGGTAGACAGGATGAAGATTAGAACATGGAATAGTTTAGTAAAACACCATATGCATATTTCAAAGAAAGCTAAGGGATGGTTTTATAGACATCATTATGAAAGCAGACATCCAAAAATAAGTTCAGAAGTACACATCCCATTAGGGGATGCTAAATTAGTAATAACAACATATTGGGGTTTAAATACAGGAGAAAGAGAATGGCATTTGGGTCATGGAGCCTCCATAGAATGGAGATTGAGGAAGTATAGCACACAAGTAGACCCTGGCCTGGCAGACCAGCTAATTCATATGTATTATTTTGATTGTTTTGCAGAATCTGCCATAAGGAAAGCCATATTAGGACACATAGTTTTTCCTAGGTGTGAATATCAAGCAGGACATAATAAGGTAGGATCTCTACAATACTTGGCACTGACAGCATTGATAAAGCCAAAAAGGAGAAAGCCACCTCTGCCTAGTGTTAGAAAATTAGTAGAGGATAGATGGAACAAGCCCCAGAAGACCAGGGGCCGCAGAGGGAACCATACAATGAATGGACATTAGAGCTATTAGAGGAACTCAAGCAGGAGGCTGTCAGGCGCTTTCCTAGACCATGGCTCCATAACTTAGGACAATATGTCTATGAAACTTATGGGGACACTTGGACGGGAGTTGAAGCTATAATAAGGATTCTGCAACAACTACTGTTTATCCATTTCAGAATTGGGTGCCAACACAGCAGAATAGGCATTTTACGACAGAGAAGAGCAAGAAATGGAGCCAGTAGATCCTAACCTAGAGCCCTGGAACCATCCAGGAAGTCAGCCTAAAACTCCTTGTACTAAATGCTATTGTAAAAAATGCAGCTATCATTGTCTAGTTTGCTTTCAGACAAAAGGCTTAGGCATTTCCTATGGCAGGAAGAAGCGGAGACAGCGACGAAGCACTCCTCCAGGTAGTGAAGATCATCAAGATCTTATATCAAAGCAGTAAGTAAATATATGTAATGTTAAATTTGCTAGCAAGAGTAGATTATAGATTAGGAGTAGGAGCACTTATAGTAGCATTAATCATAGCAATAGTTGTGTGGACCATAGCATATATAGAGTATAGGAAATTATTAAGACAAAGAAAAATAGACTATTTGATTAAAAGAATTAGGGAAAGAGCAGAGGACAGTGGCAATGAGAGTGAGGGGGATACAGAGGAATTGGCCACAATGGTGGATATGGGGCATCTTAGGCTTTTGGATAATGATAATGTGTAATGGGAACTTGTGGGTCACAGTCTATTATGGGGTACCTGTGTGGCAAGAAGCAAAAACTACTCTATTCTGTGCATCAGATGCTAAAGCATATGAGAAAGAAGTGCATAATGTCTGGGCTACACATGCCTGTGTACCCACAGACCCCAACCCACAAGAATTAGTTTTGGCAAATGTAACAGAAAATTTTAATATGTGGAAAAATGATATGGTGGATCAGATGCATGAGGATGTGATCAGCTTATGGGACCAAAGCCTAAAGCCATGTGTAAAGTTGACCCCACTTTGTGTCACTTTAAATTGTTCAAAGGCTAATGTTACCAATGTTGCCATGGATGGTACTGTCCTTAATGATACCAATGGAGAAATAAAAAATTGCTCTTTCAATGCCACCACAGAAATAAGAGATAAGAAAAAGCAAGTATATGCACTTTTTTATAGATCTGATGTAGTACCACTTAATAATGGGACTGGGAATGACTCTAGTTATATATTAATAAATTGCAATACCTCAACCATAACACAGGCCTGCCCAAAGGTCTCCTTTGACCCGATTCCTATACATTATTGTGCTCCAGCTGGGTATGCGATTCTAAAGTGTAATAATAAGACATTTAATGGGATGGGACCATGCAATAATGTCAGCACAGTACAATGTACACATGGAATTAAGCCAGTGGTATCAACTCAACTACTGTTAAACGGTAGCCTATCAGAAGAGGGGATAATAATTATCTGAAAATCTGACAAACGATATCAAAACAATAATAGTACACCTTAATGAATCTATAGAAATTGTGTGTACAAGACCTGGCAATAATACAAGAAAAAGCATAAGGATAGGACCAGGACAAACATTCTATGCAACAGGAGACATAATAGGAAATATAAGACAAGCACACTGTAACATTAGCCAAGATAAATGGGATAAAACTTTACAAAGGATAAATGAAACATTAGCAGCACACTTCCCTAATAAAACAATAAAATTTGCACCACATTCAGGAGGGGACCCAGAAATTACAACACATAGCTTTAATTGTAGAGGAGAATTTTTCTATTGTGATACAACAAAGCTATTTAATAGTACATATAATCCTAATGTTACAACAAATGCAGCAAATGGGTCAGTAATCACACTCCCATGCAGGATAAAACAATTTATAAATATGTGGCAGCAGGTAGGACGAGCAATGTATGCTCCTCCCATTGCAGGAAACATAACATGTAAATCAAACATCACAGGATTACTATTGGTGCGTGATGGAGGAAATCGCACAGAAACAGATAACACAGAGATATTCAGACCTGGAGGAGGAGATATGAGGGACAATTGGAGAAGTGAATTATACAAATATAAAGTGGTAGAACTTAAACCATTGGGAATAGCACCTACTAAGGCAAAAAGGAGAGTGGTGGAGAGAGAAAAAAGAGCAGTGGGAATAGGAGCTGTGTTCCTTGGGTTCTTGGGATTAGCAGGAAGCACTATGGGCGCGGCGTCAATAACGCTGACGGTACAGGCCAGACAATTGTTGTCTGGTATAGTGCAACAGCAAAGCAATTTGCTGAGGGCCATAGAGGCGCAACAGCATATGTTGCAACTCACGGTCTGGGGCATTAAGCAGCTCCAGACAAGAGTCCTGGCTATAGAAAGATACCTAAAGGATCAACAGCTCCTAGGGATATGGGGATGCTCTGGAAAAATCATCTGCACCACTGCTGTGCCTTGGAACTCCAGTTGGAGTAATAAATCTGAAACAGATATTTGGAATAACATGACCTGGATGCAGTGGGATAGAGAAATTAATAACTACACAAACACAATATACTCGTTGCTTGAAGCCTCGCAAATCCAGCAGGAGAAAAATGAAAAGGATTTACTAGCATTGGAGAGTTGGGACAGTCTGTGGAATTGGTTTAGCATAACAAAATGGCTGTGGTATATAAAAATATTCATAATGATAGTAGGGGGCTTGATAGGTTTAAGAATAATTTTTGCTGTGCTCTCTTTAGTAAATAGAGTTAGGCAGGGATACTCACCTTTGTCGTTTCAGACCCTTACCCCAAACCCGAGGGAACCCGACAGGCCCGGAGGAATCGAAGAAGAAGGTGGAGAGCAAGACAGAGACAGATCCATAAGATTGGTGAACGGATTCTTACCACTTATTTGGGAGGACCTGCGGAGCCTGTGCCTTTTCAGCTACCACCGATTGAGAGACTTACTATCGATTGTAGCGAGAGCAGTGGAACTTCTGGGACGCAGCAGTCTCAAGGGACTGAGGAGGGGGTGGGAAGCTCTTAAGTATTTGGGAAGTCTTGTGCAGTATTGGGGTCAGGAACTAAAAAAGAGTGCTATTAGTCTGCTTGATACCATAGCAATAGCAGTAGCTGAAGGAACAGACAGGATTATAGAATTAATACAAAGAATTTGTAGAGCTATCTACAACATACCTAGAAGAATAAGACAGGGTTTTGAAGCAGCTTTGCTATAAAATGGGGGGCAAGTGGTCAAAAAGCAGCAAGGCTGGATGGCCTGCTGTAAGAGAAAGAATAAGGAGAACTGAGCCAGCAGCAGAGGGAGTAGGACCAGCATCTCAAGACTTAGATAAATATGGAGCACTTACAAGCAGCAACACAGCCCACAATAATGATGCTTGTGCCTGGCTAGAAGCACAGGAAGAGGA
>C.ZA.03.03ZASK213B1_DQ093607_G.ES.99.X138_AF450098
TCTGTTGTGTGACTCTGGTAACTAGAGATCCCTCAGACCCTTTGTGGTAGTGTGGAAAATCTCTAGCAGTGGCGCCCGAACAGGGACCTGAAAGCGAAAGTGAGACCAGAGGAGATCTCTCGACGCAGGACTCGGCTTGCTGAAGTGCACTCGGCAAGAGGCGAGAGGCGGCGGCGGGTGAGTACGCCAAATTTTATTTGACTAGCGGAGGCTAGAAGGAGAGAGATGGGTGCGAGAGCGTCAATATTAAGAGGAGGAAAATTAGATACATGGGAAAAAATCAGGTTAAGGCCAGGGGGAAAGAAACACTATATGCTAAAACACATAGTATGGGCAAGCAGGGAGCTGGAAAGATTTGCACTTAACCCTGGTCTTTTGGAAACAGCAGAAGGCTGTAAACAAATAATAAGACAGCTACAACCAGCTCTCCAGACAGGAACAGAGGAGCTTCGATCATTATTTAACACAGTAGCAACTCTCTATTGTGTACATGCGAAGATAGAGGTACGAGACACCAAGGAAGCCTTAGACAAGATAGAGGAAGAACAACGCAAATGTCAGCAAAAAACACAGCAGGCAGAAGCAGCTGACAAAGGAAAGGTTAGTCAAAATTATCCAATAGTACAGAATGCCCAAGGGCAAATGGTACACCAGCCCATATCACCTAGGACTTTAAATGCATGGGTAAAAGTGATAGAGGAGAAAGCTTTTAGTCCAGAGGTAATACCCATGTTTACAGCATTATCAGAAGGAGCCACCCCACAAGACTTAAACACCATGTTAAATACAGTGGGAGGACATCAAGCAGCCATGCAGATGTTAAAAGATACCATCAATGAGGGGGCTGCAGAATGGGATAGGATACATCCAGTGCATGCAGGGCCTGTTGCACCAGGCCAAATGAGAGAGCCAAGGGGAAGTGACATAGCAGGAACTACTAGTACCCTGGCGGAGCAAATAGCATGGATGACAGGTAACCCACCTATCCCAGTGGGAGACATCTATAAAAGATGGATAATTCTGGGGTTAAATAAAATAGTAAGAATGTATAGCCCTGTCAGCATTTTGGACATAAAACAAGGGCCAAAGGAACCCTTTAGAGACTATGTAGACCGGTTCTTTAAAACTTTAAGGGCTGAACAAGCTACACAAGATGTAAAAAATTGGATGACAGAGACCTTGTTAATCCAAAATGCGAACCCAGATTGTAAGACAATTTTAAGAGCATTAGGAGCAGGGGCTACACTAGAAGAAATGATGACAGCATGTCAGGGAGTGGGAGGACCTGGCCACAAAGCAAGAGTATTGGCTGAGGCAATGAGCCAAGCAAACAATGCAAGCATACTAATGCAGAGAGGCAATTTTAAAGGCCCTAAAAGAATTGTTAAATGTTTCAACTGTGGCAAGGAAGGGCACATAGCCAGAAATTGCAGGGCCCCTAGGAAAAAAGGCTGTTGGAAATGTGGAAAGGAAGGACACCAACTGAAAGATTGTACTGAAAGGCAGGCCAATTTTTTAGGGAAAATTTGGCCTTCCCACAAGGGGAGGCCAGGGAATTTCCTTCAGAACAGGCCAGAGCCAACAGCCCCACCAGCAGAGAGCTTCAGGTTCGAAGAGGAGATAGCCCCCTCCCCGAAGCAAGAGCAGAAGGAAAAGGAATACCCCTTAGCCTCCCTCAAATCACTCTTTGGCAGCGACCCCTAGTCACAGTAAGAATAGGGGGACAACCAATAGAAGCCCTGTTAGACACAGGAGCAGATGATACAGTATTAGAAGAAATGAGTCTACCAGGAAAATGGAAACCAAAAATGATAGGAGGAATTGGAGGTTTTATCAAAGTAAGACAGTATGATCAAATACCTATAGAAATTTGTGGAAAAAAGGCTATAGGGACAGTATTAATAGGGCCTACACCTGTCAACATAATTGGAAGGAATCTGTTGACTCAGCTTGGCTGTACACTAAATTTTCCAATTAGTCCCATTGAAACTGTACCAGTAAAATTAAAGCCAGGAATGGATGGCCCAAAGGTCAAACAATGGCCATTGACAGAAGAGAAAATAAAAGCATTAACAGAAATTTGTGAAGAAATGGAGAAGGAAGGAAAAATTACAAAAATTGGGCCTGAAAATCCATATAATACACCAGTATTTGCCATAAAAAAGAAAGACAGTACTAAGTGGAGAAAATTAGTAGATTTCAGGGAACTCAATAAAAGAACTCAAGACTTTTGGGAGGTTCAATTAGGAATACCACACCCAGCAGGGTTAAAAAAGAAGAAATCAGTGACAGTACTAGACGTGGGGGATGCATATTTTTCAGTTCCCTTAGATGAAAGCTTCAGGAAATATACTGCATTCACCATACCTAGTACAAACAATGAAACACCAGGGATTAGATATCAATATAATGTGCTGCCACAGGGATGGAAAGGATCACCAGCAATATTCCAGTGTAGCATGACAAAAATCTTAGAGCCCTTTAGAGCAAAAAATCCAGAAATTGTCATCTATCAATATATGGATGACTTGTACGTTGGATCTGACTTAGAAATAGGGCAACATAGGGCAAAAATAGAGGAGTTAAGAGCACATCTATTAAAGTGGGGACTCACCACACCAGACAAGAAACATCAAAAAGAACCCCCATTTCTTTGGATGGGGTATGAACTCCATCCTGACAAATGGACAGTACAGCCTATACAGCTGCCAGAAAAGGATAGTTGGACTGTCAATGATATACAGAAGTTAGTGGGAAAATTAAACTGGGCAAGTCAGATTTATCCAGGAATTAAAATAAAACAACTTTGTAAACTCCTTAGGGGGGCCAAAGCACTAACAGACATAGTACCACTAACTGAAGAAGCAGAATTAGAATTGGCAGAGAACAGGGAAATTCTGAAAGAACCAGTACATGGAGTGTATTATGACCCATCAAAAGACTTGATAGCTGAAATACAGAAACAGGGTAATGACCAATGGACATATCAAATTTACCAAGAACCATTCAAAAATCTGAAAACAGGAAAGTATGCAAAAATGAGGACTGCCCACACTAATGATGTAAGACAGTTAACAGAGGCAGTGCAAAAAATAGCCCTGGAAAGCATAGTAATATGGGGAAAGAGTCCTAAATTTAGACTACCCATCCAAAAGGAAACATGGGAGACATGGTGGACAGACTATTGGCAAGCCACCTGGATTCCTGAGTGGGAGTTTGTTAATACTCCTCCCCTAGTGAAGTTATGGTACCAGCTGGAGAAAGAACCCATAGCAGGAGCAGAAACTTTCTATGTAGATGGAGCAGCTCATAGAGAGACTAAAACAGGAAAAGCAGGGTATATTACTGACAAGGGAAGGCAAAAAATTGTTTCTCTAAATGAAACAACAAATCAGAAGGCTGAGTTACAAGCAATTCAGCTAGCTTTGCAGGATTCAGGATTAGAAGTAAACATAGTAACAGACTCACAATATGCATTAGGAATCATTCAAGCACAACCAGACAAGAGTGAATCAGAGTTAGTTAACCAAATAATAGAACTGTTAATAAACAAGGAAAGGATCTACCTGTCATGGGTACCAGCACATAAAGGAATTGGAGGAAATGAACAAATAGACAAACTAGTAAGTAGTGGCATCAGGAAAGCGCTGTTTCTAGATGGGGTAGATAAGGCACAAGAAGAACATGAAAAGTATCATAACAATTGGAGAGCAATGGCTAGTGAGTTTAATCTGCCACCTATAGTAGCAAAAGAAATAGTAGCTAGCTGTGATAAATGTCAGCTAAAAGGAGAAGCCATACATGGACAAATAGACTGTAGTCCAGGGGTATGGCAATTAGATTGTACACATTTAGAAGGAAAAGTCATCCTGGTAGCAGTCCATGTAGCCAGTGGCTACATGGAAGCAGAGGTTATCCCAGCAGAAACAGGACAAGAAACAGCATACTACATACTAAAATTAGCAGGAAGATGGCCTGTCAAAATAATACATACAGACAATGGCAGTAATTTCACCAGTGCTGCAGTCAAGGCAGCCTGTTGGTGGGCAGGTATCCAACAGGAATTTGGAATTCCCTACAATCCCCAAAGTCAGGGAGTAGTAGAATCCATGAATAAAGAATTAAAGAAAATCATAGGGCAAGTAAGAGATCAAGCTGAGCACCTTAAGACAGCAGTACAAATGGCAGTATTCATTCACAATTTTAAAAGAAAAGGGGGGATTGGGGGGTACAGTGCAGGGGAGAGAATAATAGACATAATAGCATCAGACATACAAACTAAAGAATTACAAAAACAAATTATACAAATTCAAAATTTTCGGGTTTATTACAGAGACAGCAGAGACCCTATTTGGAAAGGACCAGCCAAACTACTCTGGAAAGGTGAAGGGGCAGTAGTAATACAAGATAACGGTGACATAAAAGTAGTACCAAGGAGGAAAGCAAAAATCATTAAAGATTATGGAAAACAGATGGCAGGTGCTGATTGTGTGGCAGGTAGACAGGATGAGGATTAGAACATGGAACAGTTTAGTAAAGCACCATATGTATATTTCAAAGAAAGCTTATGGATGGTTCTACAGACATCATTATGAAAGCAGACATCCAAAAGTAAGTTCAGAAGTACACATCCCATTAGGGGATGCTAGACTAGTAATAAAAACATATTGGGGGTTGCAAACAGGAGAGAGAGCTTGGCATCTAGGTCATGGGGTCTCCATAGAATGGAGATTGAGAAGATATAGCACACAAGTAGACCCTGGCCTGGCAGACCAACTAATTCATATGCATTATTTTGATTGTTTTGCAGAATCTGCCATAAGAAAAGCCATATTAGGACATATAGTTAGTCCTAGGTGTGACTATCAAGCAGGACATAATAAGGTAGGATCTCTACAATACTTGGCACTGACAGCATTGATAAAACCAAAAAGGATAAAGCCACCTCTGCCTAGTGTTAGGAAATTAGTAGAGGATAGATGGAACAACCCCCAGCAGACCAGGGGCCGCAGAGGGAACCATACAATGAATGGACATTAGAGTTACTAGAGGAACTCAAGCAGGAAGCTGTCAGACACTTTCCTAGACCATGGCTCCATGACTTAGGACAATATATCTATGAAACCTATGGGGATACTTGGACAGGAGTCGAAGTAATAATGAGAATTCTGCAACAATTACTGTTTATCCATTACAGAATTGGGTGCCAGCATAGCAGAATAGGCATTTTGAGACAAAGAAGAGCAAGAAATGGAGCCAATAGATCCTAACCTAGAACCCTGGAACCATCCAGGAAGTCAGCCCAAAACTGCTTGTAATGGATGTTTCTGCAAGAGATGCAGCTATCATTGTCTAGTTTGCTTTCAGACAAAAGGCTTAGGCATTTCCTATGGCAGGAAGAAGCGGAGACAGCGGCGACGAAGCTCTCCTCCAAGCAATAAGGATCATCAAAATCCTATATCAGAGCAGTAAGTATATGTAATGTTAGACTTAATAGAAAGAGTAGATTATAGATTAGGAATAGGAGCATTAATAGTAGCACTAATCATAGCAATAGTTGTGTGGACCATAGCATATATAGAATATAGGAAATTGGTAAGACAAAGAAAAATAGACTGGTTAGTTAAAAGAATCAGGGAAAGAGCAGAAGACAGTGGCAATGAGAGTGACGGGGATACGGAAGAATTGTCAACAATGGTGGATATGGGGCGTCTTAGGCTTTTGGATGTTAATGATTTATAGTGTGTGGGGGAACAACTTGTGGGTCACAGTCTACTATGGGGTACCTGTGTGGAAAGAAGCAAAAACTACTTTATTCTGTGCATCAGATGCTAAGGCATATGAGAGAGAAGCACATAATGTATGGGCTACACATGCCTGTGTACCCACAGACCCAAACCCACATGAAATGGAATTGGAAAATGTAACAGAAAATTTTAACATGTGGAAAAATGACATGGTAGAACAGATGCATGAGGATATAATCAGTTTATGGGATCAAAGCCTGAAGCCATGTGTAAAGTTGACCCCACTCTGTGTCACTTTGAATTGTACAAATGTTACTATTAATAGTACAAAGGTTAATAATACTGAAAGTGCAAACGTTACTGCCAGTGATGCTAGGGCCAGGGAAGAAATGAAAAATTGCTCTTTCAATGCAACCACAGAAGTACAAGATAAGAAAAAGAAAGTGTATGCACTCTTTTATAAACTTGATATAGTATCACTTAATGAGACTAAAGGCAACTTTACTAACTATAGATTAATAAATTGCAATACCTCAGCCATAGCGCAAGCCTGTCCAAAGGTCTCTTTTGACCCAATTCCTATACATTATTGTGCTCCAGCTGGTTATGCGATTCTAAAGTGTAACAATAAGACATTCAATGGAACAGGACCATGTAATAATGTCAGTATAGTGCAATGTACACATGGGATTAAGCCAGTGGTATCAACTCAACTACTGTTAAATGGTAGCCTAGCAGAAGGAGAGATAATAATTAGATCTGAAAATCTGACAAACAATGCCAAAACAATAATAGTACATCTTAATAAATCTATAGAAATTGTGTGTACAAGACCCAACAATAATACAAGAAAAAGTATAAGGATAGGACCAGGACAAACATTCTATGCAACAGGAGAGATAATAGGGAACATAAGAGAAGCACATTGTAACATTACAAATTGGAACGAGACTTTGGAAAGGGTAAAAAGGAAATTAGAAGAACACTTTCCTAATAAAACAATAAAATTTGAACCATCCTCAGGAGGGGATTTAGAAATTACAACACATAGCTTTAATTGTAGAGGAGAATTTTTCTATTGTGACACATTAAAACTGTTTAATAATAGTCTGGTTAATGATAGTGCTACAAACGACTCAATCACCATCCCATGCAGAATAAAGCAAATTATAAATATGTGGCAAAAGGTAGGACGAGCAATGTATGCCCCTCCCATTGCAGGAAACATAACATGTAGATCAAATATCACAGGACTACTATTGACACGTGATGGAGGAACAATTAATGCAACTGAAAATAATATAGAGACATTCAGACCTGGAGGAGGAGATGTGAGGGACAATTGGAGAAGTGAATTATATAAATATAAAGTGGTAGAAATTAAGCCATTAGGAATAGCACCCACTGAAGCAAAAAGGAGAGTGGTGGAGAGAGAAAAAAGAGCAGTGGGAATAGGAGCCGTGTTCCTTGGGTTCTTGGGAGCAGCAGGAAGCACTATGGGCGCAGCGTCAATAACGCTGACGGTACAGGCCAGACAACTATTGTCTGGTATAGTGCAACAGCAAAGCAATTTGCTGAGGGCTATAGAGGCGCAACAGCATATGTTGCAACTCACGGTCTGGGACATTAAGCAGCTCCAGGCGAGAGTCCTGGCCATAGAAAGATACCTACAGGATCAACGGCTCCTAGGGATGTGGGGATGCTCTGGAAAACTCATCTGCACCACTAATGTGCCTTGGAACAACAGTTGGAGTAATAAATCTCTAGACAAGATTTGGAATAACATGACCTGGATGCAGTGGGAGAGAGAAATTGATAATTACACAGAAACAATATACAGCTTGCTTGAGGACTCGCAACGCCAGCAGGAGAAAAATGAAAAAGATTTATTAGCATTGGACAAGTGGAGCAATCTGTGGACTTGGTTTAGCATATCAAACTGGCTGTGGTATATAAGAATATTCATAATGATAGTAGGAGGCTTGATAGGTTTAAGAATAATTTTTGCTGTGCTCTCTCTAGTGAATAGAGTTAGGCAGGGATACTCACCTTTGCCATTTCAGACCCTTACCCCAAACCAGATCCAGAGGGAACCCGACAGGCTCGGAAGAATCGAAGAAGGAGGTGGAGAGCAAGACAGAGACACATCCATTCGATTAGTGAACGGATTCTTGGCAATATTCTGGGACGATCTGCGGAGCCTGTGCCTTTTCAGCTACCACCGATTGAGAGACTTAATATTAATTGTGGGGAGAGCAGCGGAACTTCTGGGACGCAGCAGTCTCAGGGGACTACAGAGGGGGTGGGAAGCTCTTAAGTATTTGTGGAATCTTGTGCAGTATTGGGGTCTGGAACTAAAAAGGAGTGCTATTAGTCTGCTTGATACCATAGCAATAACAGTAGCTGAAGGAACAGATAGAATTATAGAATTAATACAAAGAGTTTGTAGAGCTATCTGCAACATACCTACAAGAATTAGACAGGGCTTTGAAACAGCTTTGCTATAAAATGGGGGGCACGTGGTCAAAATTACAGCGTAGTTGGCCTAATGTAAGAGAAAGAATGAGACGAGCTAGGCCAGCGCCAGCAGCAGAGGGAGCAGCAGAGGGAGTAGGAACAGCGTCTCAAGACTTAGATAAACATGGAGCGCTTACAAGCAGCAATACACCCAGCAATAATGCTGCTTGTGCCTGGCTGCAAGCGCAAGAGGAGGA
>C.BW.00.00BW07621_AF443088_H.BE.93.VI991_AF190127
TCTCTAGCAGTGGCGCCCGAACAGGGACTTGAAAGTGAAAGTAAGACCAGAGGAGATCTCTCGACGCAGGACTCGGCTTGCTGAAGTGCACTCGGCAAGAGGCGAGAGCGGCGACTGGTGAGTACGCCAAAATTTTATTTGACTAGCGGAGGCTAGAAGGAGAGAGATGGGTGCGAGAGCGTCAATATTAAGAGGGGAAAAATTAGATAAATGGGAAAAAATTAGGTTAAGGCCAGGGGGGAGAAAGCATTATATGATAAAACACATAGTATGGGCAAGCAGGGAGCTGGAAAGATTTGCACTTAACCCTGGCCTTTTAGAGACATCAGAAGGCTGTAAACAAATAATAAAACAGCTACAACCAGCTCTTCAGACAGGAACAGAGGAACTTAGATCATTATATAACACAGTAGCAACTCTCTATTGTGTACATAAAAAGATAGATGTACGAGACACCAAGGAGGCATTAGACCAGATAGAGAAAGAACAAAACCAAAGTCAGCAAAAAACACAGCAGGCAGAAACGGCTGACAAAAAGGTCAGTCAAAATTATCCTATAGTACAGAATATCCAAGGGCAAATGGTACACCAGTCCTTATCACCTAGAACTTTGAATGCATGGGTAAAAGTAATAGAGGAGAAGGCTTTCAGCCCAGAGGTAATTCCCATGTTTACAGCATTATCAGAAGGAGCCACCCCACAAGATCTAAACACCATGTTAAACACAGTAGGGGGACATCAAGCAGCCATGCAAATGTTAAAAGATACCATCAATGAGGAGGCTGCAGAATGGGATAGGTTACATCCAGTACATGCAGGGCCTATTGCACCAGGCCAAATGAGAGAACCAAGGGGAAGTGACATAGCAGGAACTACTAGTACCCTTCAGGAACAAATAGCATGGATGACAAGTAACCCACCTGTCCCAGTAGGAGAAATCTATAAAAGATGGATAATTCTGGGGTTAAATAAAATAGTAAGAATGTATAGCCCTGTCAGCATTTTGGACATAAAACAAGGGCCAAAGGAACCCTTTAGAGACTATGTAGATCGGTTCTTCAAAACGTTAAGAGCTGAACAAGCTACACAAGAGGTAAAGAATTGGATGACAGACACCTTGTTAGTCCAAAATGCGAACCCAGATTGTAAGACCATTTTAAGAGCATTAGGACCAGGGGCTTCATTAGAAGAAATGATGACAGCATGTCAGGGAGTGGGAGGACCTAGCCACAAAGCTAGGGTTTTGGCTGAGGCAATGAGCCAAGCAAACAATACAAACATAATGTTGCAGAAAAACAATTTTAAAGGCCCTAGAAGAATTGTTAAATGTTTCAACTGTGGCAAGGAGGGGCATATAGCCAGGAATTGCAGGGCCCCTAGGAAAAAAGGCTGTTGGAAATGTGGAAAGGAAGGACACCAAATGAAAGACTGTACTGAAAGGCAGGCTAATTTTTTAGGGAAAATTTGGCCTTCCCACAAGGGGAGGCCAGGGAATTTCCTCCAGAGCAGACCAGAGCCAACAGCCCCACCAGCAGAGAGCTTCAAGTTCGAGGAGACAAACCCCACTCCGAAGCAGGAGCCGAAAGACAGGGAACCCTTAACTTCCCTCAAATCACTCTTTGGCAGCGACCCCTTGTCTCAATAAAGGTAGGGGGTCAAATAAAGGAGGCTCTTTTAGATACAGGAGCAGATGATACAGTACTAGAAGACATAAATTTGCCAGGAAAGTGGAAACCAAAAATGATAGGAGGAATTGGAGGTTTTATCAAAGTAAGACAGTATGATCAAATACTTATAGAGATTTGTGGAAAAAGGGCTATAGGTACAGTATTAGTAGGACCTACACCTGTCAACATAATTGGAAGAAATATGTTGACTCAGCTTGGATGCACACTAAATTTTCCAATTAGTCCTATTGAAACTGTACCAGTAAAATTAAAGCCAGGGATGGATGGCCCAAAGGTTAGACAATGGCCATTGACAGAAGAAAAAATAAAAGCATTAACAGCAATTTGTGATGAGATGGAAAAGGAAGGAAAAATTACAAAAATTGGGCCTGAAAATCCATATAACACTCCGGTATTTGCCATAAAAAAGAAGGACAGTACAAAGTGGAGAAAATTAGTAGATTTTAGGGAACTCAATAAAAGAACTCAAGACTTTTGGGAAGTTCAATTAGGAATACCACACCCAGCAGGGTTAAAAAAGAAAAAATCAGTGACAGTACTGGATGTGGGGGATGCATATTTTTCAGTTCCTCTAGATGAAAATTTCAGGAAATATACTGCATTCACCATACCTAGTATAAACAATGAAACACCAGGGATTAGGTATCAATATAATGTTCTTCCACAGGGATGGAAAGGGTCACCAGCAATATTCCAGAGTAGCATGACAAGAATCTTAGAGCCCTTTAGGACACAAAATCCAGAAATAGTTATCTATCAGTATATGGATGACTTGTATGTAGGATCTGATTTAGAAATAGGGCAACATAGAGTAAAAATAGAGGAGTTAAGAAGACACCTATTGAAATGGGGATTTACCACACCAGACAAGAAACATCAGAAAGAACCCCCATTTCTTTGGATGGGGTATGAACTCCATCCGGACAAATGGACAGTACAGCCTATACAGCTGCCAGAGAAAGAAGACTGGACTGTCAATGATATACAGAAGTTAGTGGGAAAGTTAAACTGGGCCAGTCAAATTTACCCAGGGATTAAAGTAAGGCAACTGTGTAAACTCCTTAGAGGAGCCAAAGCACTAACAGACATAGTGCCACTGACTGAAGAAGCAGAATTAGAATTGGCTGAGAACAGGGAAATTCTAAAAGAACCAGTACATGGAGTATATTATGACCCATCAAAAGATTTAATAGCTGACATACAAAAACAGGGGAATGACCAATGGACATATCAAATTTACCAAGAACCATTCAAAAATCTGAAAACAGGAAAGTATGCAAAAATGAGGACTGCCCACACTAATGATGTAAAACAGTTAACAGAGGCAGTGCAAAAGATAAGCAGAGAAAGCATAGTAATCTGGGGAAAGACTCCTAAATTCAGACTACCCATCCAAAAAGAAACATGGGAGACATGGTGGACAGACTATTGGCAAGCTACCTGGATTCCTGAGTGGGAGTTTGTTAACACCCCTCCCCTAGTAAAATTATGGTACCAGCTGGAAAAAGACCCCTTGGTAGGAGTAGAAACTTTCTATGTAGATGGAGCAGCTAATAGGGATACTAAAATAGGAAAAGCAGGATATGTTACTGACAAAGGAAGGCGGAAAGTCATTACTCTAACTGAAACAACAAATCAGAAAACTGAATTACAAGCAATTCAGCTAGCTTTGCAGGATTCAGGACCAGAAGTAAACATAGTAACAGATTCACAGTATGCACTAGGAATCATTCAAGCACAACCAGATAAGAGTGAATCAGAGTTAGTCAATCAAATAATAGAACAACTAATAAAAAAGGAAAAGGTCTACCTGTCATGGGTACCAGCACATAAAGGAATTGGAGGAAATGAACAAATAGATAAATTAGTAAGTAGTGGAATCAGAAAAGTACTATTTCTAGATGGGATAGATAAAGCTCAAGTACAGCATGAAAAATATCACAGTAATTGGAGAGCAATGGCCAGTGATTTTAATCTGCCACCTATAGTAGCAAAAGAAATAGTAGCTAGCTGTGATAAATGTCAGTTAAAAGGGGAAGCCATACATGGACAAGTAGACTGTAGTCCAGGGATATGGCAATTAGATTGTACACATTTAGAAGGAAAGACCATCCTGGTAGCAGTCCATGTAGCCAGTGGCTACATGGAAGCAGAGGTTATCCCAGCAGAAACAGGACAAGAAACAGCATATTACATACTAAAATTAGCAGGAAGATGGCCAGTCAAAATAATACATACAGACAATGGCAGTAATTTCACCAGTGCTGCAGTTAAGGCAGCCTGTTGGTGGGCAGGTATCCAGCAGGAATTTGGAATTCCCTACAATCCCCAAAGTCAGGGAGTAGTAGAATCCATGAACAAAGAATTAAAGAAAATCATAGGACAGGTAAGAGATCAAGCTGAGCACCTTAAGACGGCAGTACAAATGGCAGTATTCATTCACAATTTTAAAAGAAGAGGGGGGATTGGGGGGTACAGTGCAGGGGAAAGAATAATAGACATAATAGCAACAGACATACAAACTAGAGAATTACAAAAACGAATTATACAAATTCAAAATTTTCGGGTTTATTACAGAGACAGCAGAGACCCTATTTGGAAAGGACCAGCCAAACTACTCTGGAAAGGTGAAGGGGCAGTAGTAATACAAGATAATAGTGACATAAAGGTAATACCAAGGAGGAAAGCAAAAATCATTAAGGACTATGGAAAACAGATGGCAGGTGCTGATTGTGTGGCAGGTAGACAGGATGAAGATTAGAACATGGAACAGTTTAGTAAAACATCATATGTATGTTTCAAAGAGAGCAAATGGATGGTTTTACAGACATCATTATGAAAGCAGACATCCAAAATTAAGTTCAGAAGTACACATTCCATTAGGGGATGCTAGATTAGTAATAAAAACATATTGGGGTTTGCATACAGGAGAAAGAGATTGGCATTTGGGTCATGGAGTCTCCATAGAATGGAAATTGAGAAGATACAGCACACAAGTAGACCCTGGCCTGGCAGACCAGCTAATTCATATGCATTATTTTGATTGTTTTGCAGACTCTGCCATAAGAAAAGCCTTATTAGGACAAGTAGTTATTCCTAGGTGTGACTATCAAGCAGGACATAATAAGGTAGGATCTCTACAATATTTGGCACTGACAGCATTGATAAAACCAAAAAAGAGAAAGCCACCTCTGCCTAGTGTTAGGAAATTAGTAGAGGATAGATGGAACAAGCCCCAGAAGACCAGGGGCCGCAGAGGGAACCATACAATGAATGGACACTAGAGCTCCTAGAGGAACTCAAACAGGAAGCTGTCAGACACTTCCCTAGACCATGGCTCCATAGCTTAGGGCAGCATATCTATAATACATATGGAGATACTTGGACAGGAGTAGAGGCTATAATAAGAATTTTGCAACAACTACTGTTTATTCATTTCAGAATTGGATGCCAGCATAGCAGAATAGGTATTATGCGACAGAGAAGAACAAGAAATGGAGCAAGTAGATCCTAACCTAGAGCCCTGGAACCATCCAGGAAGTCAGCCTAAAACTCCTTGTAATAAGTGCTTTTGCAAAAGTTGTAGCTATCATTGTCTAGTTTGCTTTCAGACAAAAGGCTTAGGCATTTCATATGGCAGGAAGAAGCGGAGACAACGACGACACGCTCCTCCAGGCAGTAAGGATCATCAAAATCCTATATCAAAGCAGTAAGTACTAAATAGTAGATGTAATGATAGAGTTAATAGCTGCAGTAGATTATAGAATAGGAGTAGCAGCACTTATAATAGCACTAATCATAGCAATAGTTGTGTGGACCATAGCATATATAGAGTATAGGAAATTGTTAAAACAAAAGAAAATAGACAGGCTAATTAAGAGAATTATAGAAAGGGCAGAAGACAGTGGCAATGAGAGTGATGGGGATCATGAGGAATTGTCAACAATGGTGGATATGGGTCATCTTAGGCTTTTGGATGCTAATGGTTTGTAATGTAATAGGGAACTTGTGGGTCACAGTCTATTATGGGGTACCTGTGTGGAGAGAAGCAAAGACTACTCTATTTTGTGCATCAGATGCTAAAGCATATGACAGAGAAGTGCATAATGTCTGGGCTACACATGCCTGTGTACCCACAGACCCCAACCCACAAGAACTGGTTTTGGAAAATGTAACAGAAAATTTTAACATGTGGAAAAATTACATGGTGGACCAGATGCATGAGGATATAATCAGTTTATGGGATCAAAGCCTAAAACCATGTGTAAAGTTGACCCCACTCTGTGTCACTTTAAACTGTATTAATGTTACTAATGCTACCAATGTTACTAATGCTGACTATAAAAATTGCTCTTTCAATATAACCACAGAACTAAGAGATAAGAGAAAGAAAGAATATGCACTTTTTTATAGACTGGATATAGTACAACTTGGGGAGAATAATGCCAATTCCAGTGAGTATAGATTAATAAATTGTAATACCTCAACCATAACACAAGCCTGTCCAAAGGTCAATTTTGACCCAATTCCTATACATTATTGTGCTCCAGCTGGTTATGCGATTCTAAAGTGTAATACTAAGACATTCGATGGAACAGGACCATGCACTAATGTCAGCACTGTACAATGTACACATGGAATTAAGCCAGTAGTATCAACCCAACTACTGTTAAATGGTAGTCTATCAGAAGAAGGGATAGTAATTAGGTCTGAAAATATAACAAACAATGCTAAAACAATAATAGTGCATCTTAATGAATCTGTAGAAATCGTGTGTACAAGGCCCGGCAATAATACAAGAAGAAGTGTGAGGATAGGACCAGGACAAACATTCTATGCAACAGGAGACATAATAGGAAATATAAGACAAGCACATTGTAACATTAGTAAAACTAAATGGAATAAGACCTTGAGCAGGATTGGGGAAAAATTAAAGGAACACTTCCCTAATAAAACCATAAGATTTAACTCATCTGCAGGAGGGGACTTAGAAATTACAACACATAGCTTTAACTGTAGAGGAGAGTTTTTCTATTGCAATACAACAAGACTGTTTAATGGTACATATAATAGTACAGGAAATGATACAAATTCAACAAATTCAACCATCACACTCCAATGCAGAATAAAACAAATTATAAACATGTGGCAGGGGGTAGGAAAAGCAATGTATGCCCCGCCCATTGCAGGAAACATAATATGTAAATCAAACATTACAGGACTACTATTGACACGTGATGGAGGTGAAGGTGAAAATACAACAGAGACATTCAGGCCTGCAGGAGGAGATATGAGGGACAATTGGAGAAGTGAATTATATAAATATAAAGTGGTAGAAATTAAGCCATTAGGAATAGCACCCACTAGCGCAAAAAGGAGAGTGGTGGAGAGAGAAAAAAGAGCAGTAGTGGGAATAGGAGCTGTGTTCCTTGGATTCTTGGGAGCAGCAGGAAGCACTATGGGCGCAGCATCAATAACGCTGATGGTACAGGCCAGACAACTGTTGTCTGGTATAGTGCAACAGCAAAACAATTTGCTGAGAGCTATAGAGGCGCAACAGCATATGTTGCAACTCACGGTCTGGGGCATTAAGCAGCTCCAGACAAGAGTTCTGGCTATAGAAAGATACCTAAAGGATCAACAGCTCCTAGGGATTTGGGGCTGCTCTGGAAAACTCATCTGCACCACTGCCGTGCCTTGGAACGCTAGTTGGAGTAATAAATCTGAAGGAGATATTTGGAATAACATGACCTGGATGCAGTGGGATAGAGAAATTAGTAACTACACAAACACAATATACAGGTTGCTTGAAAACTCGCAAATCCAGCAGGAACAAAATGAAAAGGATTTACTAGCATTGGACAGTTGGAAAAATCTGTGGAGTTGGTTTGACATATCAAATTGGCTGTGGTATATAAAAATATTCATAATGATAGTAGGAGGCTTGATAGGCTTAAGAATAATTTTTGCTGTGCTATCTATAGTAAATAGAGTCAGGCAGGGATACTCACCTTTATCATTTCAGACCCTTACCCCAAACCAGAGGGGACCCGACAGGCTCGGAGGAATCGAAGAAGAAGGTGGAGAGCAAGACAGAGACAGATCCATTCGATTAGTGAGCGGATTCTTAGCACTGTTCTGGGACGACCTGCGGAGCCTGTGCCTTTTCAGCTACCACCGATTGAGAGACTTCATATTGGTTGCAGCGAGAGCGGTGGAACTTCTGGGACGCAGCAGCCTCAAGGGACTCCAGAGGGGATGGGAAATCCTTAAATATCTGGGAATTCTTGTGCAGTATTGGGGTCTAGAGCTAAAAAAGAGTGCTATTAGTTTGTTTGATACCATAGCAATAGCAGTAGCTGAGGGAACAGATAGGATTATAGAAGCGATACAAAGAATTTGTAGAGCTATCTGCAACATACCTAGAAGAATAAGACAAGGTTTTGAAGCAGCTTTGCAATAAAATGGGGGGCAAGTGGTCAAAAAGCAGTATAGTTGGATGGCCTGCTGTAAGAGAAAGAATAAGAAGAACTGATCCAGCAGCAGAGGGAGTAGGAGCAGCATCTCAAGACTTAGATAGACATGGGGCAATTACAAGCAGCAACACGCCCACCACTAACGCTGCTTGTGCCTGGCTGGAAGCGCAAGAGGAGGATGAAGTAGGCTTTCCAGTCAGACCTCAGGTACCTTTAAGGCCAATGACTTATAAGGGAGCATTAGATCTCGGCTTCTTTTTAAAAGAAAAGGGGGGACTGGAGGGGTTAATTTACTCCACTAAAAGGAAAGAGATATTAGATTTGTGGGTCTATCACACACAAGGCTACTTCCCTGATTGGCAAAACTACACACCGGGACCGGGGACCAGATATTCACTGACCTTTGGATGGCCCTTCAAGCTAGTACCAGTTGACCCAAAGGAAGTAGAAGAGGCCAATGAAGGGGAAAACAACTGTTTGCTACACCCTATGAGCCAGCATAGAATAGATGATGATCACAGAGAAGTATTAATGTGGAAGTTTGACAGTAGCCTAGCACGCAGACACGTGGCCCGCGAGCTACATCCGGAATATTACAAAGACTGCTGACACAGAAGGGACTTTCCGCTGGGACTTTCCACTGGGGCGTTCCAGGAGGAGTGGTCTGGGCGGGACTAGGGAGTGGCCAGCCCTCAGATGCTGCATATAAGCAGCTGCTTTTCGCCTGTACTGGGTCTCTCTAGGTAGACCAGATCTGAGCCTGGGAGCTCTCTGGCTATCTAGAGAACCCACTGCTTAAGCCTCAATAAAGCTTGCCTTGAGTGCTTTAAGTAGTGTGTGCCCGTCTGTTGTGTGACTCTGGTAACTAGAGATCCCTCAGACC
>C.ZA.04.04ZASK217B1_DQ056417_J.SE.94.SE7022_AF082395
TCTGTTGTGTGACTCTGGTAACTAGAGATCCCTCAGACCTTTTTGGCAGTGTGGAAAATCTCTAGCAGTGGCGCCCGAACAGGGACGCGAAAGCGAAAGCAAGACCAGAGAAGATCTCTCGACGCAGGACTCGGCTTGCTGAAGTGCACTCGGCAAGAGGCGAGAGGGGCGGCTGGTGAGTACGCCAATTTTTATTTGACTAGCGGAGGCTAGAAGGAGAGAGATGGGTGCGAGAGCGTCAATATTACGAGGCGGAAAATTAGATAAATGGGAAAAAATTAGGTTAAGGCCAGGGGGAAAGAAACATTATATGCTAAAACATTTAGTATGGGCAAGCAGGGAGCTGGAAAGATTTGCACTTAACCCTGGTCTTTTAGAAACAGCAGATGGCTGTAAGCAAATAATAAAACAGCTACAACCAGCTCTTCAGACAGGGACAGAGGAACTTAGATCATTATACAACACAGTAGCAACTCTCTATTGTGTACATCGAGAGATAGATGTACGAGATACCAAGGAAGCTTTAGACAAAATAGAGGAAGAACAAAACAAAAGTCAGCAAAAGGCACAGCAGGCAAAAATGGCTGACAATAAGGTCAGTCAAAATTATCCGATAGTGCAGAATCTCCAGGGGCAAATGGTACACCAGTCCCTATCACCAAGAACTTTGAATGCATGGGTAAAAGTCATAGAGGAGAAGGCTTTTAGCCCAGAGGTAATACCCATGTTTACAGCATTATCAGAAGGAGCCACTCCCCAAGACTTAAACACCATGTTAAATACAGTGGGGGGACATCAAGCAGCCATGCAAATGTTAAAAGATACCATCAATGAAGAGGCTGCAGAATGGGACAGAACTCATCCAGTACAGGCAGGGCCTATTCCACCAAATCAAATAAGAGATCCAAGGGGAAGTGATATAGCAGGAACTACTAGTACCCTTCAGGAACAAATAACATGGATGACAAGTAACCCACCTGTTCCAGTGGGAGAAATCTATAAAAGATGGATAATTCTGGGGTTAAATAAAATAGTAAGAATGTATAGCCCTGTCAGCATTTTGGACATAAGACAAGGGCCAAAGGAACCCTTTAGAGACTATGTAGATCGGTTCTTTAAAGTTTTAAGAGCTGAACAAGCTACACAAGATGTAAAAAATTGGATGACAGAAACCTTGTTGGTCCAAAATGCGAACCCAGATTGTAAAACCATTTTAAGAGCATTAGGACCAGCGGCTACATTAGAGGAAATGATGACAGCATGTCAGGGAGTGGGAGGACCTGGCCACAAAGCAAGAGTGTTGGCTGAGGCAATGAGCCAAGTAAACAATACAAATGTAATGATGCAGAGAAGCAATTTTAAAGGCCCTAGAAGAAGTATTAAATGTTTTAACTGTGGCAAGGAAGGGCACACAGCCAAAAATTGCAGGGCCCCTAGGAAAAAAGGCTGTTGGAAATGTGGAAGAGAAGGACACCAAATGAAAGACTGTACTGAAAGGCAGGCTAATTTTTTAGGGAGAATTTGGCCTTCCCACAAGGGGAGGCCAGGGAATTTCATGCAGAACAGGCTAGAGCCGACAGCCCCACCAGCAGAGAGCTTCAGGTTCGAGGAGACAACCTCAGCTCCGAAGCAGGAGCCGAAGGATGGGGAACCCTTAACTTCCCTCAAATCACTCTTTGGCAGCGACCCCTTGTCTCAATAAAAGTAGGGGGCCAGATAAAGGAGGCTCTCTTAGATACAGGAGCAGATGATACAGTATTAGAAGAAATAAATTTGCCAGGAAAATGGAAACCAAAAATGATAGGAGGAATTGGAGGTTTTATCAAAGTAAGACAGTATGATCAAATAACTATAGAAATTTGTGGAAAAAAGGCTATAGGTACAGTATTAGTGGGACCTACACCTGTCAACATAATTGGAAGAAATCTGTTGACTCAGCTTGGATGCACACTAAATTTTCCAATTAGTCCCATTGAAACTGTACCAGTAAAATTGAAGCCAGGAATGGATGGCCCAAAGGTTAAACAATGGCCATTGACAGAAGAGAAAATAAAAGCATTAACACAAATTTGTGCAGAACTGGAAGAGGAGGGAAAAATTTCAAGAATTGGGCCTGAAAATCCATATAACACCCCAGTATTTGCCATAAAGAAAAAAGACAGTACTAAATGGAGAAAATTAGTAGATTTTAGAGAACTCAATAAAAGAACTCAAGACTTTTGGGAAGTTCAATTAGGGATACCACACCCAGCAGGGTTGAAAAAGAAGAAATCAGTGACAGTACTGGATGTGGGGGATGCATATTTTTCAGTCCCTTTAGATGAAGAATTCAGGAAGTATACTGCATTCACCATACCTAGTACAAACAATGAAACACCAGGAATTAGATATCAATATAATGTGCTTCCACAGGGATGGAAGGGATCACCAGCAATATTCCAGAGTAGCATGACAAAAATCTTAGAGCCCTTTAGGACACAAAATCCAGAAATAGTCATCTATCAATATATGGATGACTTGTATGTAGGATCTGACTTAGAAATAGGGCAACATAGAGAAAAAATAGAGGAGTTAAGAGAACATCTGTTAAGGTGGGGATTTACCACACCAGACAAGAAACATCAGAAAGAACCCCCATTTCTTTGGATGGGATATGAACTCCATCCTGACAAATGGACAGTACAGCCTATACAGTTGCCAGAAAAGGATAGCTGGACTGTCAATGATATACAAAAGTTAGTGGGAAAATTAAACTGGGCGAGTCAGATTTACCCAGGAATTAAGGTAAGACAGCTGTGTAAACTAATTAGGGGGACCAAAGCACTAACAGACATAGTACCACTAACTGAAGAAGCAGAATTAGAATTGGCAGAGAATAGGGAAATTCTAAAAGAACCAGTACATGGGGTATACTATGACCCATCAAAAGACTTAATAGCTGAAATACAGAAACAGGGACATGATCAATGGACATATCAAATTTACCAGGAACCATTCAAAAATCTGAAAACAGGGAAATATGCAAAAATGAAAAATGCCCACACTAATGATGTGAAACAATTAGCAGAGGCAGTACAAAAAGTAGCCTTGGAAAGCATAGTAATATGGGGAAAGACTCCTAAATTTAGACTACCCATCCAAAAAGAAACATGGGAGGCATGGTGGACAGACTATTGGCAAGCCACCTGGATTCCTGAATGGGAGTTTGTTGATACCCCTCCCCTAGTAAAATTATGGTACCAGCTGGAGAAAGAACCTATAGCAGGAGCAGAGACTTTCTATGTAGATGGAGCAGCTAATAGGGAAACTAAATTAGGAAAAGCAGGGTATGTTACTGACAGAGGAAGGCAGAAAATTATTTCTCTGACTGAAACAACAAATCAGAAGACTGAATTACAGGCAATTCATCTAGCTTTGCAAGACTCAGGATCAGAAGTAAACATAGTGACAGACTCCCAATATGCACTAGGAACCATTCAAGCACAACCAGATAAGAGTGAATCAGAATTAGTCAACCAAATAATAGAACAATTAATAAACAAGGAAAGGGTCTACCTGTCATGGGTACCAGCACATAAAGGAATTGGAGGAAATGAACAAGTAGATAAATTAGTAAGTAGTGGAATCAGGAAAGTGCTGTTTCTAGATGGAATAGATAAGGTTCAGGAAGATCATGAAAAGTATCACAGCAATTGGAGAGCAATGGCTAATGAGTTTAATCTGCCACCCATAGTAGCAAAAGAAATAGTAGCTAGCTGTGATAAGTGTCAGTTAAAAGGGGAGGCCATGCATGGACAAGTAGACTGTAGTCCAGGGATATGGCAATTAGATTGTACACATCTGGAAGGAAAAATCATCATAGTAGCAGTCCATGTAGCCAGTGGCTACATAGAAGCAGAGGTTATCCCAGCAGAGACAGGACAAGAAACAGCATACTTTCTACTAAAATTAGCAGGAAGATGGCCAGTCAAGGTAGTACATACAGACAATGGCAGTAATTTCACCAGCGCTGCAGTTAAGGCAGCCTGTTGGTGGGCAGGTATCAAACAGGAATTTGGAATTCCCTACAATCCCCAAAGTCAGGGAGTAGTAGAGTCCATGAATAAAGAATTAAAGAAAATCATAGGGCAGGTAAGAGATCAAGCTGAGCACCTTAAGACAGCAGTACAAATGGCAGTATTCATTCACAATTTTAAAAGAAAAGGGGGGATTGGGGGGTACAGTGCAGGGGAAAGAATAATAGACATAATAGCAACAGACATACAAACTAAAGAATTACAAAAACAAATTACAAAAATTCAAAATTTTCGGGTTTATTACAGAGACAGCAGAGACCCCATTTGGAAAGGACCAGCAAAACTGCTCTGGAAAGGAGAAGGGGCAGTAGTAATACAAGATAATAGTGACATAAAGGTAATACCAAGAAGGAAAGCAAAAATTATTAGGGACTATGGAAAACAGATGGCAGGTGATGATTGTATGGCAAGTAGACAGGATGAGGATTAGAACATGGAATAGTTTAGTAAAGCACCATATGCATATTTCAAAGAGAGCTAGTGGATGGTATTACAGACATCATTTTGAAAGTAGACATCCAAAAGTAAGTTCAGAGGTACACATCCCAGTAGGGAAGGCTAAATTAATAATAAAAACATATTGGGGTCTGCATCCAGGAGAAAGAGATTGGCATTTGGGTAATGGAGTCTCCATAGAATGGAGATGGAATAATTATAGCACACAAGTAGAACCTGGCCTGGCAGACCAGCTAATTCATATGCATTATTTTGATTGTTTTGCAGACTCTGCCATAAGGAAAGCCATATTAGGACACATAGTTTATCCTAGGTGTGACTATCAAGCAGGACATAATAAGGTAGGATCTCTACAGTACTTGGCATTGACAGCATTGATAAAACCAAAAAGGGTAAAGCCACCTCTGCCTAGTCTTAGGAAATTAGTAGAGGATAGATGGAACAAGCCCCAGCAGATCAGGGGCCGCAGAGGGAGCCATACAATGAATGGACACTAGAGATTCTAGAGGAACTCAAGCAGGAAGCTGTCAGACACTTTCCTAGACCTTGGCTCCATGAATTAGGACAATACATCTATCAAACTTATGGGGACACTTGGGCAGGGGTCGAAGCTCTACTAAGAATGCTGCAACAACTACTGTTTGTCCATTTCAGAATTGGGTGCCAGCATAGCAGAATAGGCATTTTACGACAGAGAAGAACCAGAAATGGAGCCAATAGATCCTAACCTAGAGCCCTGGAACCATCCAGGAAGTCAGCCTAAAACTCCTTGTAATAAATGTTTTTGTAAACACTGTTGCTACCATTGTCAAGTTTGCTTCCTGACAAAAGGCTTAGGCATTTCCTATGGCAGGAAGAAGCGGAGACAGCGAAGAAACGCTCCTTCAAGCAGTGAGGATCATCAAAATCTTGTATCAGAGCAGTAAGTATATGTAATGTTAGAATCAATAGATTATAGATTAGGAGTAGCAGCTTTGTTATTAGCACTAATCATAGCAATAATTGTGTGGATCATAGCATATCTAGAATATAGGAAATTGTTAAGACAAAGAAGAATAGACAAGTTAATTAAAAGGATTAGGGAAAGAGCAGAAGACAGTGGCAATGAGAGTGAGGGGGATATTGAGGAATTATCAACAATGGTGGATGTGGAGCATCTTAGGCTTTTGGATGTTAATAATTTGTAGTGGGGTGGGAAACTTGTGGGTCACAGTCTATTATGGGGTACCCGTGTGGAAAGAAGCAAAAACTACTCTATTCTGTGCATCAGATGCTAAAGCATATGATACAGAAGTGCACAATGTCTGGGCCACACATGCCTGTGTACCCACAGACCCCAACCCACAAGAAATGGTTTTGGGAAATGTAACAGAAGATTTTAACATGTGGAACAATGACATGGTGGATCAGATGCATGAGGATGTAATCAGTTTATGGGATCAAAGCCTAAAACCATGTGTAGAATTGACCCCACTCTGTGTCACTCTACACTGCAATAATGATACCATTACTAACCACACTGGAAATGCTACCTTTAGTCCTAAAGACACTGAAGGAATGAGAAATTGCTCTTTCAATATAACCACAGAACTAAAAGATGAGACACAGCGAGCGTATGCGCTTTTTTATAGACCTGATATAGAGAAAATTGATGGAAGTGAGAGTAATGGTACATATAGATTAATAAATTGTAATACCTCAACCATAACACAAGCCTGTCCAAAGGTCACTTTTGACCCAATTCCTATACATTATTGTGCTCCAGCTGGTTATGCGATTCTAAAGTGTAATAATAAGACATTCAATGGGAAAGGACCATGTCAGAATGTCAGCACAGTACAATGTACACATGGAATTAAGCCAGTAGTAACAACTCAACTACTATTAAATGGTAGCCTAGCAGAAGAAGAGATAATAATTAGATCTGAAAATCTGACAAACAATGTCAAAACAATAATAGTGCAGCTTAATGAATCAATACCAATTGTGTGTAAAAGACCTGGCAATAACACAAGGAAAAGCATAGGGCTAGGACCAGGACGAGCATTCTTTGCACATGGAGACATAATTGGAGACATAAGACAAGCACATTGTATCATTAGTGAAGAAAAGTGGAATGACACTTTACAAAGGGTAGGCAAAAAACTAGGAGAACATTTCAATAGCACAATAAACTTTACAGCAGCCTCAGGAGGAGACTTAGAAATTACAACACATAGTTTTAATTGTGGAGGAGAATTTTTCTATTGCAATACATCAGGCCTATTTAATGGTACATACAATCCAGCATACACGTATAATGCGACAAATAACTCAACCATCACACTCCAATGCAGAATAAGACAAATTATAAACATGTGGCAGAAGGTGGGAAGAGCAATGTATGCCCCTCCCATTGCAGGAAACATAACATGTAATTCGAGCATCACAGGACTACTGTTGGTACGTGATGGAGGCAAAAACACAAGTGGAATAGAAACATTCAGACCCGGAGGAGGAAACATGAAGGACAATTGGAGAAGTGAATTATATAAATATAAAGTGGTAGAAATTAAGCCATTGGGAGTAGCACCCACGAGTGCAAAAAGGAGAGTGGTGGAGAGAGAAAAAAGAGCAGTGGGACTAGGAGCTGTGTTCCTTGGGTTCTTGGGAGCAGCAGGAAGCACTATGGGCGCGGCGTCAATAACGCTGACGGTACAGGCCAGACAATTATTGTCTGGTATAGTGCAGCAGCAAAGTAATTTGCTGAGAGCTATAGAGGCGCAACAACATATGTTGCAACTCACAGTCTGGGGCATTAAACAGCTCCAGGCAAGAGTCCTGGCTATCGAAAGATACCTAACGGATCAACAGTTCCTAGGGCTTTGGGGCTGCTCTGGAAAACTCATCTGCACCACTGCTGTACCGTGGAACTCCAGTTGGAGTAATAAATCTCAAGCAGATATTTGGGATAACATGACCTGGATGCAATGGGATAGAGAAATTAATAATTACACAAACACAATATACAGGTTGCTTGAAGAATCACAAAACCAGCAGGAAAAGAATGAAAAAGATTTATTAGCATTGGACAGTTGGAACAGCTTGTGGAGTTGGTTTAATATATCAAATTGGCTGTGGTATATAAGAATATTCATAATGATAGTAGGAGGCTTGATAGGCTTAAGAATAGTTTTTGCTGTGCTATCTATAGTAAATAGAGTTAGGCAGGGATACTCACCTTTGTCATTTCAGACCCTTACCCCGAACCCAGAGGGACCAGACAGGCTCGGAAGAATCGAAGAAGGAGGTGGAGAGCCAGACAAAAGCAGATCCATACGCTTAGTGAGCGGATTCTTGTCACTTGCCTGGGACGACCTACGGAGCCTGTGCCTCTTCTGCTACCACCGATTGAGAGACTTAACATTGGTGACAGCGAGAGCGGCGGAACTTCTGGGACGCAGCAGTCTCAGGGGACTACAGAGGGGGTGGGAAGCACTCAAGTATCTGGGGAGCCTTGTGCAGTATTGGGGTCTGGAACTGAAAAAGAGTGCAATTAGTTTGATTGATGCCATAGCAATAGCAGTAGCTGAAGGAACAGATAGGATTATAGAATTAGTACAAAGATTTTGTAGAGGTATCCTCAACGTACCTAGAAGAATAAGACAGGGCTTTGAAGCAGCTTTGCAATAAAATGGGGGGCAAGTGGTCAAAATGCAGTGGATGGCCTGTTGTAAGAGAAAGAATGAGGCGAGCTCAGCCAGCAGCAGAAAGAATGAGGCGAGCTCAGCCAGCAGCAGAGGGAGTAGGAACAGCATCTCAAGACTTAGATAGACATGGAGCACTTACAACCAGCAATACAGACACCAATAATGCTGCTTGTGCCTGGCTAAGAGCGCAAGAGGAGGA
>C.ZA.03.03ZASK097B1_AY878060_K.CM.96.MP535_AJ249239
TCTGTTGTGTGACTCTGGTAACTAGAGATCCCTCAGACCCTTGTTGGTAGTGTGGAAAATCTCTAGCAGTGGCGCCCGAACAGGGACCCGAAAGCGAAAGTAAGACCAGAGAAGATCTCTCGACGCAGGACTCGGCTTGCTGAAGTGCACTCGGCAAGAGGCGAGAGCGGCGGCTGGTGAGTACGCCAATTTTTATTTGACCAGCGGAGGCTAGAAGGAGAGAGATGGGTGCGAGAGCGTCAGTATTAAGAGGCGAAAAATTAGATGCATGGGAAAAGATTAGGTTAAGGCCAGGGGGAAAGAAACATTATATGTTAAAACACATAGTATGGGCAAGCAGGGAGCTGGAAAAATTTGCACTTAACCCTGGCCTTTTAGAAACATCAGAAGGCTGTAAACAAATACTGGCACAGCTACACCCAGCTCTTCAGACAGGAACAGAGGAACTTAAATCACTCTTCAACACAGTAGCAACTCTCTATTGTGTACATAAAAGGATAGATGTACGAGACACCAAGGAAGCATTAGACAAGATAGAGGAAGAACAAAACAAAAGTCAGCAACAAACACAGCAGGCAAAAGCGGCTGAAGGAAAGATCAGTCAAAATTATCCTATAGTACAGAATCTCCAAGGGCAAATGGTACATCAAGCCCTATCACCCAGAACCTTGAATGCCTGGGTAAAGGTAGTAGAGGAGAAGGCTTTTAGCCCAGAGGTAATACCCATGTTTTCAGCATTATCAGAAGGAGCCACCCCACAAGATTTAAACTCCATGCTAAATGCGGTGGGGGGACATCAAGCGGCCATGCAAATGTTAAAAGATACCATCAATGAGGAGGCTGCAGAATGGGATAGATTACATCCAGTACATGCAGGGCCTATTGCACCAGGCCAAATGAGAGAACCAAGGGGAAGTGACATAGCAGGAACTACTAGTACCCTTCAGGAACAAATAGGATGGATGACAAGCAACCCACCTATGCCAGTGGGAGAAATCTATAAAAGATGGATAACTCTGGGGTTAAATAAAATAGTGAGAATGTATAGCCCTGTCAGCATTTTGGACACAAGACAAGGGCCAAAGGAACCCTTCAGAGACTATGTAGACCGGTTCTTTAAAACTTTAAGAGCTGAACAAGCTACACAAGATGTAAAAAATTGGATGACAGACACCTTGTTGGCCCAAAATGCAAACCCAGATTGTAAGACCATTTTAAAAGCATTAGGACAAGGGGCTACATTAGAAGAAATGATGACAGCATGTCAGGGAGTGGGAGGGCCTAGCCACAAAGCAAGAGTGTTGGCTGAGGCAATGAGCCAGGCAAACAATGCAAACGTAATGATGCAGAGAAGCAATTTTAAAGGCCCTAAAAGAATTGTTAAGTGTTTCAACTGTGGCAAGGAAGGACACATAGCCAGAAATTGCAGGGCCCCTAGAAAGAAGGGCTGTTGGAAATGTGGAAAGGAAGGACACCAAATGAAAGATTGTACTACTGAGAGACAGGCTAATTTTTTAGGGAAAATTTGGCCTTCCCACAAGGGGGGGCCAGGGAATTTTCTTCAGAGCAGGCCAGAGCCAACAGCCCCACCAGCAGAGAGCTTCAGGTTCGAGGAGACAACCCCCGCTCCGAAGCAGGAGCAGAAAGACAGGGAACCCTTAACTTCCCTCAAATCACTCTTTGGCAGCGACCCCTTGTCACAATAAAAATAGGGGGCCAGACAAAGGAAGCTCTCTTAGACACAGGAGCAGATGATACAGTATTAGAAGAAATAAATTTGCCAGGAAAATGGAAACCAAAAATGATAGGAGGAATTGGAGGTTTTATTAAAGTAAGACAATATGAGCAAATATCTATAGAAATTTGTGGAAAAAAGGCTATAGGTACAGTATTAGTAGGACCTACGCCTGTCAACATAATTGGAAGAAATCTGTTGACTCAGCTTGGCTGCACTTTAAATTTTCCAATCAGTCCTGTTGAAACTGTACCAGTAAAATTAAAGCCAGGAATGGATGGCCCAAAGGTTAAACAATGGCCATTGACAGAAGAAAAAATAAAAGCATTAACAGCAATTTGTGATGAAATGGAAAAGGAAGGAAAAATTACAAAAATTGGGCCTGAAAATCCATATAATACTCCAGTATTTGCCATAAAAAAGAAGGACAGTACTAAATGGAGGAAATTAGTAGATTTCAAGGAACTTAATAAAAGAACTCAAGACTTTTGGGAGGTTCAATTAGGAATACCACACCCAGCAGGGTTAAAAAAGAAAAAATCAGTAACAGTATTGGATGTGGGGGATGCATATTTTTCAGTTCCTTTAGATGAAGGCTTCAGGAAATATACTGCATTCACCATACCTAGTATAAACAATGAAACACCAGGGATTAGATATCAATATAATGTGCTCCCACAGGGATGGAAAGGATCACCAGCAATATTCCAAAGTAGCATGATAAAAATCTTAGAACCCTTTAGAGCAAAAAATCCAGAAATAGTTATCTATCAATATATGGATGACTTGTATGTAGGATCTGACCTAGAAATAGAGCAACATAGAGCTAAAGTAGAGGAGTTAAGAGAGCATCTATTAAGGTGGGGATTTACCACACCAGACAAGAAACATCGGAAAGAACCCCCATTTCTTTGGATGGGGTATGAACTCCATCCTGACAAATGGACAGTACAGCCTATACAGTTGCCAGAAAAGGAGAGCTGGACTGTCAATGACATACAGAAGTTAGTGGGAAAATTAAACTGGGCAAGCCAGATTTACCCAGGGATTAAAGTAAAGCAACTGTGTAAACTCCTTAGGGGGACCAAAGCACTAACAGACATAGTACCACTAACTGAAGAAGCAGAATTAGAATTGGCAGAGAACAGGGAAATTTTAAAAGAACCAGTACATGGAGCATATTATGACCCATCAAAAGATTTGATAGCTGAAATACAGAAACAGGGGGATGGCCAATGGACATATCAGATTTACCAAGAGCCATTTAAAAATCTGAAAACAGGGAAGTATGCAAAAATGAGGACTGCCCATACTAATGATGTAAGACAGTTAACAGAGGCAGTACAAAAAATATCCATGGAAAGCATAGTAATATGGGGAAAGACTCCTAAATTTAGACTACCCATCCAGAAAGAAACATGGGAGACATGGTGGTCAGACTATTGGCAAGCCACCTGGATTCCTGAGTGGGAGTTTGTTAATACCCCTCCCCTAGTAAAGCTATGGTACCAGCTGGAGAAGGAACCCATAGCAGGAGTAGAAACTTTCTATGTAGATGGAGCAGCTAATAGGGAAACTAGAATAGGAAAAGCAGGGTATGTTACTGATAGAGGAAGGCAGAAGGTTATCTCTCTAACTGAAACAACAAATCAGAAAACTGAATTGCAAGCAATTCAGCTAGCTTTGCAAGATTCAGGATCAGAGGTAAACATAGTAACAGACTCACAGTATGCATTAGGAATCATTCAAGCACAACCAGATAAGAGTGAGTCAGAGATAGTCAACCAAATAATAGAACAATTGATAAAAAAGGAAAGGGTCTACCTGTCCTGGGTACCGGCACATAAAGGAATTGGAGGAAATGAACAAGTAGATAAACTAGTAAGTAGTGGAATCAGAAAAGTGCTATTTCTAGATGGAATAGATAAGGCTCAAGAAGAGCATGAAAAGTATCACAGCAATTGGAGAGCAATGGCTAGTGAGTTTAATCTGCCACCCATAGTAGCAAAAGAAATAGTAGCTAGCTGTGATAAATGTCAGCTAAAAGGGGAAGCCACACATGGACAAGTAGATTGTAGTCCAGGGATATGGCAATTAGATTGTACACATTTAGAGGGAAAAGTCATCCTGGTAGCAGTTCATGTAGCCAGTGGCTACATAGAAGCAGAGGTTATCCCCGCAGAAACAGGACAAGAAACAGCATACTGTATACTAAAATTAGCAGGAAGATGGCCAGTCAAAGTAATACATACAGACAATGGCAGTAATTTCACCAGTGCTGCAGTAAAAGCAGCCTGTTGGTGGGCAGGTATCCAACAGGAATTTGGAATTCCCTACAATCCCCAAAGTCAAGGAGTAGTAGAATCAATGAATAAAGAATTAAAGAAAATCATAGGGCAGGTGAGAGAACAAGCTGAGCATCTTAAGACAGCAGTACAAATGGCAGTATTCATTCACAATTTTAAAAGAAAAGGGGGGATTGGGGGGTATAGTGCAGGGGAAAGAATAATAGACATAATAGCAACAGGCATACAAACTAAAGAATTACAGAAACAAATTATAAAAATTCAAAATTTTCGGGTTTATTACAGAGACAGCAGAGACCCTATTTGGAAAGGACCAGCCAAACTACTCTGGAAAGGTGAAGGGGCAGTAGTAATACAAGATAACAGTGACATAAAGGTAGTACCAAGAAGGAAAGTAAAAATAATTAAGGATTATGGAAAACAGATGGCAGGTGCTGATTGTGTGGCAGGTAGACAGGATGAAGATTAGAACTTGGAATAGTTTAGTAAAACACCATATGTATGTTTCAAGGAGAGCTAGTGGATGGTTTTACAGACATCATTATGAAAGCAGACATCCAAAAATAAGTTCAGAAGTACACATACCATTAGGGGAGGCTAGATTAATAATAAAAACATATTGGGGTTTGCAAACAGGAGAAAGAGATTGGCATTTGGGTCATGGAGTCTCCATAGAATGGAGATTGAGAAGATATAGCACACAAGTAGACCCTGACATGGCAGACCAGCTAATTCATCTGTATTATTTTGATTGTTTTGCAGACTCTGCCATAAGAAAAGCCATATTAGGACACATAGTTATTCCTAGGTGTGACTATCAAGCAGGACATAATAAGGTAGGATCTCTACAATACTTGGCACTGACAGCATTGATAAAACCAAGAAGGATAAAACCACCTCTGCCTAGTGTTAGGAAGTTAGTAGAGGATAGATGGAACAAGCCCCAGAAGACCAGGGGCCACAGAGGGAACCATACAATGAATGGACACTAGAGATTTTAGAAGAACTCAAGCAGGAAGCTGTCAGACACTTTCCTAGACCATGGCTCCATAGCATAGGACAATATATCTATGAAACCTATGGAGATACTTGGACAGGAGTCGAAGCTATAATAAGAGTATTGCAACAACTACTGTTTATTCATTTCAGAATTGGGTGCCAGCATAGCAGAATAGGCATTTTGCGACAGAGAAGAGCAAGAAATGGAGCCAGTAGATCCTAACCTAGAGCCCTGGAACCATCCAGGAAGTCAGCCTAAAACTCCTTGTAATGCATGCTATTGTAAAAAACGCAGCTATCATTGTCTAGCTTGCTTTCAGAAAAAAGGCTTAGGAATTTCCTATGGCAGGAAGAAGCGGAGACAGCGACGAAGCGCTCCTCCAAGCAATAAGGATCATCAAAATTCTATATCAAAGCAGTAAGTATATATATGTAATGGTGGATTTACTAGCAGCAGTAGATTATAGAATAGGAGTAGGAGCTCTGGGAATAGCACTAATCATAGCAATAGTTGTGTGGACCATAGTATACATAGAATATAGGAAACTAGTAAGACAAAGAAAAATAGACAGGTTAATTAAAAGAATTAGGGAAAGAGCAGAAGATAGTGGCAATGAGAGTGAGGGGGATACAGAGGAATTGGCCACAATGGTGGATATGGAACATCTTAGGCTTTTGGATAATAATGACTTGTAGTGTGGTGGGGAACTTGTGGGTCACAGTCTATTATGGGGTACCTGTGTGGAAAGAAGCAAAAACTACTCTATTCTGTGCATCAGATGCTAGAGCATATGAGAAAGAAGTGCATAATGTTTGGGCTACACATGCCTGTGTACCCACAGACCCCAACCCACAAGAAATGGTTTTGGGAAATGTAACAGAAAATTTTAACATGTGGAGAAATGACATGGTGGATCAGATGCATGAAGATATAATCAGTTTATGGGATCAAAGCCTAAAGCCATGCGTAAAGTTGACCCCCCTCTGTGTCACTTTAAGATGTACAAAGCCAAATGTTACGAGTACTAATGTGACTGAAGGCATGAAAAATTGCTCTTTCAATACAACCACAGAAATAAGAGATAAGAAACAAAAAGCATATGCACTTTTTTATAGATCTGATATAGTACCACTTGGGACAAACAACAACTCTAGTAGTGAGTATATATTAATAAATTGCAATACCTCAACCATAACTCAAGCCTGTCCAAAGGTCTCTTTTGGCCCAATTCCTATACATTATTGTGCTCCAGCTGGTTATGCGATTCTAAAATGTAATGATAAGACATTTAATGGGATGGGACCATGCAATAATGTCAGCACAGTACAATGTACACATGGCATTAAGCCAGTGGTATCAACTCAACTACTATTAAATGGTAGCCTAGCAGAAGAGGAGATAATAATCAGATCTGAAAATCTGACAGATAATGGCAAAACAATAATAGTACACCTTAATGAATCTGCAAGCATTATATGTACAAGACCTGGCAATAATACAAGAAAAAGTATAAGGATAGGACCAGGACAAACATTCTATGCAACAGGAGATATAATAGGAGACATAAGAGAAGCACACTGTAACATTAGTAGAAGTAATTGGACTAACACTTTACACAGGGTAACGGAAAAATTAAAAGAACACTTCAATAAAACAATAATAACATTTAGACCACCCTCAGGAGGGGACTTAGAAATTATAACACATAGTTTTAATTGTAGAGGAGAATTTTTCTATTGCAATACACCAGGACTGTTTAATGGGACATACAATGAGAGTAGTGAAATAAGTAATGATACCATCAGACTCCCATGCAGAATAAAACAAATTATAAACATGTGGCAAGGGGTAGGACGAGCAATGTATGCCCCTCCCATTGCAGGGAACATAACTTGTAGCTCAAGTATCACAGGACTACTATTGACACGGGATGGAGGAAAGGATAATGATAATAATGGGAATGAGACATTCAGACCTGGAGGAGGAAATATGAAGGACAATTGGAGAAGTGAATTATATAAATATAAAGTGGTAGAAATTAAGCCATTGGGAATAGCACCCACTGGGGCAAAAAGGAGAGTGGTGGAAAGAGAAAAAAGAGCAGTGGGAATAGGAGCTGTGTTCCTTGGGTTCTTGGGAGCTGCAGGAAGCACTATGGGCGCGGCGTCAATAACGCTGACGGTACAGGCCAGACAACTGTTGTCTGGTATAGTGCAACAGCAAAGCAATTTGCTGAGAGCTATAGAGGCGCAACAGCATATGTTGCAACTCACGGTCTGGGGCATTAAGCAGCTCCAGGCAAGAGTCCTGGCCATAGAAAGATACCTAAAGGATCAACAGCTCCTAGGACTTTGGGGCTGCTCTGGAAAACTCATCTGCACCACTGCTGTGCCTTGGAACTCCAGTTGGAGTAATAAATCTCAAACAGATATTTGGGATAACATGACATGGATGCAGTGGGATAGAGAAATTGATAATTACACAAACATAATATACAACTTGCTTGAAATCTCGCAAAACCAGCAGGAGAAAAATGAAAAGGATTTATTAGCATTGGACAAGTGGGAAACTCTGTGGAATTGGTTTGACATAACACATTGGCTGTGGTATATAAAAATATTCATCATGATAGTAGGAGGCTTGATAGGCTTGAGAATAATTTTTGCTGTGCTCTCTATAGTGAATAGAGTTAGGCAGGGATACTCACCTTTATCATTTCAGACCCTTATCCCAACCTCGAGGGGAGCAGACAGACCCGAAGGAATCGAAGAAGAAGGTGGAGAGCAAGACAAAAACAGATCAGTTCGATTAGTGAGCGGCTTCTTAGCGCTTGCCTGGGACGATCTGCGGAACCTGTGCCTCTTGTGCTACCACCTATTGAGAGACTTCATATTGGTGGCAGCGAGGGCGGCGGAACTTCTGGGACGCAGCAGTCTCAGGGGACTACAGAGAGGGTGGGAAGCCCTTAAGTATCTGGGAAATCTTGTGCAGTACTGGGGTTTGGAGCTAAAAAAGAGTGCTATTAGTTTGCTTGATACCATAGCAATAGCAGTAGGTGAAGGAACAGATAGGCTTATAGAATTAATACAAAGATTTTGTAGAGCTATCCTCAACATACCTAGAAGAGTAAGACAGGGATTTGAAGCAGCTTTGCTATAAAATGGGGGGCAAGTGGTCAAAAAGCAGCATAGTAGGATGGCCTGATGTAAGACAAAGAATACAACAAACTGAACCAGCAGCAGAGGGAGTAGGAGCAGCGTCTCGAGACTTAGAGAAATATGGAGCACTTACAAGCAGCAACACATCCACCAACAATGCTGCCTGTGCCTGGCTGGAAGCGCAAGAGGAAGA
>D.CD.85.Z2Z6_M22639_F1.FI.93.FIN9363_AF075703
TGGAAGGGCTAATTTGGTCAAAAAGAAGACAAGACATCCTTGATCTTTGGGTCTACAACACACAAGGCATCTTCCCTGATTGGCAGAACTACACACCAGGGCCAGGGATCAGATATCCACTGACCTTTGGATGGTGCTTCGAGCTAGTACCAGTTGATCCACGGGAGGTAGAAGAGGCCACTGAAGGAGAGACCAACTGCTTGTTACACCCTGTATGCCAGCATGGAATGGAGGACACGGAGAGAGAAGTGTTAAAGTGGAGATTTAACAGCAGACTAGCATTTGAACACAAGGCCCGAGAGCTGCATCCGGAGTTCTACAAAGACTGCTGACACCAAGTTTTCTACAAGGGACTTTCCGCTGGGGACTTTCCGGGGAGGCGTGGACTGGGCGGGACTGGGGAGTGGCTAACCCTCAGATGCTGCATATAAGCAGCTGCTTTTTGCCTGTACTGGGTCTCTCTGGTTAGACCAGATTTGAGCCTGAGAGCTCTCTGGCTAGCTAGGGAACCCACTGCTTAAGCCTCAATAAAGCTTGCCTTGAGTGCTTCAAGTAGTGTGTGCCCGTCTGTTGTGTGACTCTGGTAACTAGAGATCCCTCAGACCCCTTTAGTCAGAGTGGAAAATCTCTAGCAGTGGCGCCCGAACAGGGACCTGAAAGCGAAAGTAGAACCAGAGAAGCTCTCTCGACGCAGGACTCGGCTTGCTGAAGCGCGCACGGCAAGAGGCGAGGGGCAGCGACCGGTGAGTACGCTAAAAATTTTGACTAGCGGAGGCTAGAAGGAGAGAGATGGGTGCGAGAGCGTCAGTATTAAGCGGGGGAAAATTGGATGCATGGGAAAAAATTCGGTTACGGCCAGGAGGAAAGAAAAAATATAGACTAAAACATCTAGTATGGGCAAGCAGGGAGCTAGAACGATTTGCACTTAATCCTGGCCTTTTAGAGACATCAGATGGCTGTAAACAAATAATAGGACAGCTACAACCAGCTATCCGGACAGGATCAGAAGAACTTAGATCATTATTTAATACAGTAGCAACCCTCTATTGTGTACATGAAAGGATAGAGGTAAAAGACACCAAGGAAGCTTTAGAAAAGATGGAGGAAGAACAAAACAAAAGTAAGAACAAAAAGGCACAGCAAGCGGCAGCTGCAGCTGACAAAGGGGTCAGTCAAAATTACCCTATAGTACAGAATCTTCAGGGACAAATGGTACATCAGGCTATATCACCTAGAACTTTAAATGCATGGGTAAAGGTGATAGAAGAGAAGGCTTTTAGCCCAGAAGTTATACCCATGTTTTCAGCATTATCAGAAGGAGCCACCCCACAAGATTTAAATACCATGCTAAACACAGTGGGGGGACATCAAGCAGCCATGCAAATGCTAAAGGAGACCATCAATGAGGAAGCTGCAGAATGGGATAGGTTACATCCAGTGCATGCAGGGCCTATTGCACCAGGCCAGATGAGAGAACCAAGGGGAAGTGATATAGCAGGAACTACTAGTACCCTTCAGGAACAAATAGCATGGATGACAAGCAACCCACCTATCCCAGTAGGAGAAATCTATAAAAGATGGATAATCCTGGGATTAAATAAAATAGTAAGAATGTATAGCCCTGTCAGCATTTTGGACATAAGACAGGGACCAAAGGAACCTTTTAGAGACTATGTAGACCGGTTCTATAAAACTCTAAGAGCCGAGCAAGCTTCACAGGAAGTAAAAGGTTGGATGACAGAAACCTTGTTGGTCCAAAATGCAAACCCAGATTGTAAGACCATCTTAAAAGCATTGGGACCACAGGCTACACTAGAAGAAATGATGACAGCATGTCAGGGAGTGGGGGGGCCCAGCCATAAAGCAAGAGTTCTGGCTGAGGCAATGAGCCAAGCAACAAATTCAGCTGCCGCAGTAATGATGCAGAGAGGCAATTTTAAGGGCCCAAGAAAAACTATTAAGTGTTTCAACTGTGGCAAAGAAGGGCACATAGCAAAAAATTGCAGGGCCCCTAGGAGAAAGGGCTGTTGGAAATGTGGAAAGGAAGGACACCAACTGAAGGATTGCACTGAAAGACAGGCTAATTTTTTAGGGAAGATTTGGCCTTCCCACAAGGGAAGGCCGGGGAACTTTCTTCAGAGCAGACCAGAGCCAACAGCCCCACCAGCAGAGAGCTTCGGGTTTGGGGAAGAGATAACCCCCTCTCAGAAACAGGAGCAGAAAGACAAGGAACTGTATCCTTCAACTGCCCTCAAATCACTCTTTGGCAACGACCCCTTGTTACAATAAAAATAGGGGGACAGCTAAAGGAAGCTCTATTAGATACAGGAGCAGATGATACAGTATTAGAAGAAATGAATTTGCCAGGAAAATGGAAACCAAAAATGATAGGGGGAATTGGAGGTTTTATCAAAGTAAGACAGTATGATCAAATACTCATAGAAATCTGTGGGCATAAAGCTATAGGTACAGTATTAGTAGGACCTACACCTGTCAACATAATTGGAAGAAATTTGTTGACCCAGATTGGCTGCACTTTAAATTTTCCAATTAGTCCTATTGAAACTGTACCAGTAAAATTAAAGCCAGGAATGGATGGCCCAAAAGTTAAACAATGGCCATTGACAGAAGAAAAAATAAAAGCATTAACAGAAATTTGTACAGAAATGGAAAAGGAAGGAAAAATTTCAAGAGTTGGGCCTGAAAATCCATACAATACTCCCATATTTGCCATAAAGAAAAAAGACAGTACCAAGTGGAGAAAATTAGTAGATTTCAGGGAACTTAATAAGAGAACTCAAGATTTCTGGGAAGTTCAATTAGGAATACCGCATCCGGCAGGGCTAAAAAAGAAAAAATCAGTAACAGTACTGGATGTGGGTGATGCATATTTTTCAGTTCCCTTAGATAAAGACTTTAGGAAATATACTGCATTTACCATACCTAGTATAAATAATGAGACACCAGGGATTAGATATCAGTACAATGTGCTTCCACAGGGATGGAAAGGATCACCGGCAATATTCCAAAGTAGCATGACAAAAATCTTAGAGCCCTTTAGAAAACAAAATCCAGAAATAGTTATCTATCAATACATGGATGATTTGTATGTAGGATCTGACTTAGAAATAGGGCAGCATAGAACAAAAATAGAGGAATTAAGAGAACATCTATTAAGGTGGGGATTTACCACACCAGATAAAAAACATCAGAAAGAACCCCCATTTCTTTGGATGGGGTATGAACTCCATCCTGATAAATGGACAGTACAGTCTATAAAATTGCCAGAAAAGGAGAGCTGGACTGTCAATGATATACAGAAGTTAGTGGGGAAATTAAACTGGGCAAGCCAGATTTATCCAGGAATTAAAGTAAGGCAATTGTGTAAACTCCTTAGGGGAACCAAAGCACTAACAGAAGTAATACCACTAACAGAAGAAGCAGAATTAGAACTGGCAGAAAACAGGGAAATTCTAAAAGAACCAGTACATGGAGTGTATTATGACCCATCAAAAGACTTAATAGCAGAAATACAGAAACAAGGGCACGGCCAATGGACATACCAAATTTATCAAGAACCATTTAAAAATCTGAAAACAGGAAAGTATGCAAGAATGAGGGGTGCCCACACTAATGATGTAAAACAATTAGCAGAGGTAGTGCAAAAAATATCCACAGAAAGCATAGTGATATGGGGAAAGACTCCTAAATTTAGATTACCCATACAAAAGGAAACATGGGAAACATGGTGGGTAGAGTATTGGCAAGCCACTTGGATTCCTGAGTGGGAATTTGTCAATACCCCTCCTTTAGTAAAATTATGGTACCAGTTAGAGAAGGAACCCATAATAGGAGCAGAAACTTTCTATGTAGATGGGGCAGCTAATAGAGAGACTAAATTAGGAAAGGCAGGATATGTTACTGACAGAGGAAGACAGAAAGTTGTCCCTTTTACTGATACAACAAATCAGAAGACTGAGTTACAAGCAATTAATTTAGCTTTGCAGGATTCGGGATTAGAAGTAAACATAGTAACAGATTCACAATATGCATTAGGAATCATTCAAGCACAACCAGATAAGAGTGAATCAGAGTTAGTCAGTCAAATAATAGAGCAGTTAATAAAAAAGGAAAAGGTTTACCTGGCATGGGTACCAGCACATAAAGGAATTGGAGGAAATGAACAAGTAGATAAATTAGTCAGTCAGGGAATCAGGAAAGTACTATTTTTGGATGGAATAGATAAAGCTCAAGAAGAACATGAGAAATATCACAACAATTGGAGAGCAATGGCTAGTGATTTTAACCTACCACCTGTGGTAGCAAAAGAAATAGTAGCTAGCTGTGATAAATGTCAGCTAAAAGGAGAAGCCATGCATGGACAAGTAGACTGTAGTCCAGGAATATGGCAATTAGATTGTACACATTTAGAAGGAAAAGTTATCCTGGTAGCAGTTCATGTAGCCAGTGGCTATATAGAAGCAGAAGTTATTCCAGCAGAAACAGGGCAGGAAACAGCATATTTTATTTTAAAATTAGCAGGAAGATGGCCAGTAAAAATAGTACATACAGACAATGGCAGCAATTTCACCAGTGCTGCAGTTAAGGCTGCCTGTTGGTGGGCAGGTATTAAACAGGAATTTGGAATTCCCTACAATCCCCAAAGTCAAGGAGTAGTAGAATCTATGAATAAAGAATTGAAGAAAATTATAGGACAGGTAAGAGATCAAGCTGAGCATCTTAAGACAGCTGTACAAATGGCAGTATTCATCCACAATTTTAAAAGAAAAGGGGGGATTGGGGGATACAGTGCAGGGGAGAGAATAATAGACATAATAGCAACAGACATACAAACTAAAGAATTACAAAAACAAATCACAAAAATTCAAAATTTTCGGGTTTATTACAGGGACAGCAGAGATCCAATTTGGAAAGGACCAGCAAAGCTCCTCTGGAAAGGTGAAGGGGCAGTAGTAATACAAGACAATAGTGACATAAAGGTAGTACCAAGAAGAAAAGTAAAGATTATCAGGGATTATGGAAAACAGATGGCAGGTGATGATTGTGTGGCAAGTAGACAGGATGAGGATTAGAACATGGAAAAGTTTAGTAAAACACCATATGTATGTTTCAAAGAAAGCTAGCAGATGGTTTTATAGACATCACTATGACAGCCCCCACCCAAAAATAAGTTCAGAAGTACACATTCCACTAGGAGAAGCTATGCTGGTAGTAAAAACATATTGGGGTCTGCATACAGGAGAAAGAGACTGGCATCTGGGTCAGGGAGTCTCCATAGAATGGAGGAAAAGGAGATATAGCACACAAGTAGACCCTGGCCTGGCAGACCAACTAATTCATATGTATTATTTTGATTGTTTTTCAGAAGCTGCCATAAGAAAAGCCATATTAGGACATATAGTCAGTCATAGGTGTGAGTATCAAGCAGGACATAGCAAGGTAGGATCCTTACAGTATTTGGCACTAACAGCATTAGTAGCACCAAAAAAGATAAAGCCGCCTTTGCCTAGTGTTAGGAAGTTAACAGAAGATAGATGGAACAAGCCCCAGAAGACCAAGGGCCACAAAGGGAGCCATACAATGAATGGACATTAGAGCTTTTAGAGGAGCTTAAGAGTGAAGCTGTTAGACATTTTCCTAGGATATGGCTCCATAGCTTAGGACAATATATTTATGAAACTTATGGGGATACCTGGGCAGGAGTTGAAGCTCTAATAAGAATTTTGCAACAATTACTGTTTATTCATTTCAGAATTGGGTGTCAACATAGCAGAATAGGTATTACTCGACAGAGAAGAGCAAGAAATGGATCCAGTAGATCCTAACATAGAGCCCTGGAACCATCCAGGAAGTCAGCCTAAGACTGCTTGTAACAGGTGTCATTGTAAAAAGTGTTGCTATCATTGCCAAGTTTGCTTCATAACGAAAGGCTTAGGCATCTCCTATGGCAGGAAGAAGCGGAGACAGAGACGAAGACCTTCTCAAGGCGGTCAGACTCATCAAGATCCTATACCAAAGCAGTAAGTAGTACATGTAATGCAACCTTCACAGATAATAGCAATAGCAGCATTAGTAGTAGCAGCAATAATAGCAATAGTTGTGTGGACCATAGTATTCATAGAATATAGGAGGATAAAAAGGCAAAGAAAAATAGACTGTATAATTGATAGAATAAGAGAAAGAGCAGAAGACAGTGGCAATGAGAGTGAGGGGGATAGAGAGGAATTGTCAAAACTTGTGGAAATGGGGCATCATGCTCCTTGGGATATTGATGACCTGTAGTAATGCAGACAATCTGTGGGTCACAGTGTATTATGGGGTGCCTGTATGGAAGGAAGCAACCACCACTCTATTTTGTGCATCAGATGCTAAATCATATAAAACAGAGGCACATAATATCTGGGCCACACATGCCTGTGTACCCACGGACCCCAACCCACAAGAAATAGAACTGGAAAATGTGACAGAAAACTTTAACATGTGGAGAAATAACATGGTGGAACAGATGCATGAGGATATAATCAGTTTATGGGATCAAAGCCTAAAACCATGTGTAAAATTAACCCCACTCTGTGTCACTTTAAACTGCATAGATGAAGTGATGGAGAATGTCACAATGAAGAATAATAATGTCACAGAGGAAATAAGAATGAAAAACTGCTCTTTCAATATAACTACAGTAGTAAGAGATAAGACAAAACAAGTACATGCACTTTTTTATAGACTTGATATAGTACCCATAGACAATGATAATAGTACCAATAGTACCAATTATAGATTAATAAATTGTAATACCTCAGCCATTACACAGGCTTGTCCAAAGGTGTCCTTTGAGCCAATTCCCATACATTATTGTGCCCCAGCTGGTTTTGCAATTCTAAAATGTAGAGATAAAAGGTTCAATGGAACAGGCCCATGCACAAATGTCAGCACAGTACAATGTACACATGGAATTAGGCCAGTGGTGTCAACTCAACTGCTGTTGAATGGCAGTCTAGCAGAAGAAGAGATCATAATTAGATCTGAAAACCTCACAAACAATGCTAAAATCATAATAGTACAGCTCAATGAGTCTGTAGCAATTAACTGTACAAGGCCCTACAGAAATATAAGACAAAGGACATCTATAGGATTAGGGCAAGCGCTCTATACAACAAAAACAAGAAGTATAATAGGACAAGCATATTGTAATATTAGTAAAAATGAATGGAATAAGACATTACAACAGGTAGCTATAAAATTAGGAAACCTTCTTAACAAAACAACAATAATTTTTAAACCATCCTCAGGAGGGGACCCAGAAATTACAACACACAGTTTTAATTGTGGAGGGGAATTCTTCTACTGTAATACATCAGGACTGTTTAATAGTACATGGGATATTAGTAAATCAGAATGGGCTAATAGTACAGAGTCAGATGATAAACCAATCACACTCCAATGCAGAATAAAACAAATTATAAACATGTGGCAGGGAGTAGGAAAAGCAATGTATGCCCCTCCCATCGAAGGACAAATTAATTGTTCATCAAATATTACAGGGCTATTATTGACAAGAGATGGTGGTACAAATAATAGTTCTAACGAGACCTTCAGACCTGGAGGAGGAGATATGAGGGACAATTGGAGAAGTGAATTATATAAATATAAGGTAGTAAAAATTGAGCCACTAGGAGTAGCACCTACCAGGGCAAAGAGAAGAGTGGTGGAAAGAGAAAAAAGAGCAATAGGACTAGGAGCTATGTTCCTTGGGTTCTTGGGAGCAGCAGGAAGCACGATGGGCGCACGGTCATTGACGCTGACGGTACAGGCCAGACAGTTATTGTCTGGTATAGTGCAACAGCAAAACAATTTGCTGAGGGCTATAGAGGCGCAACAGCATCTGTTGCAACTCACGGTCTGGGGCATTAAACAGCTCCAGGCAAGAATCCTGGCTGTAGAGAGATACCTAAAGGATCAACAGCTCCTAGGAATTTGGGGTTGCTCTGGAAAACTCATTTGCACCACTACTGTGCCCTGGAACTCTAGTTGGAGTAATAGATCTCTAAATGACATTTGGCAGAACATGACCTGGATGGAGTGGGAAAGAGAAATTGACAATTACACAGGCTTAATATATAGATTAATTGAAGAATCGCAAACCCAGCAAGAAAAGAATGAACAAGAATTATTGGAATTGGACAAGTGGGCAAGTTTGTGGAATTGGTTTAACATAACACAATGGCTGTGGTATATAAAAATATTCATAATGATAGTAGGAGGCTTGATAGGTTTAAGAATAGTTTTTGCTGTGCTTTCTTTAGTAAATAGAGTTAGGCAGGGATATTCACCTCTGTCATTTCAGACCCTCCTCCCAGCCCCGAGGGGACCCGACAGGCCCGAAGGAATAGAAGAAGAAGGTGGAGAGCGAGGCAGAGACAGATCCATTCGATTGGTGAACGGATTCTCAGCACTTATCTGGGACGATCTGAGGAACCTGTGCCTCTTCAGCTACCACCGCTTGAGAGACTTAATCTTAATTGCAGCGAGGATTGTGGAGCTTCTGGGACGCAGGGGGTGGGAAGCCCTCAAATATCTGTGGAATCTCCTACAGTATTGGAGTCGGGAACTGAAGAACAGTGCTAGTAGCTTGCTTGATACCATAGCAATAGCAGTAGCTGAGGGGACAGATAGGGTTATAGAAATAGTACGAAGAGCTTGCAGAGCTGTTCTTCACATACCCACAAGAATAAGACAGGGCTTAGAAAGGCTTTTGCTTTAACATGGGTGGCAGATGGTCAAAAAGTAGTATAGTTGGATGGCCTGCTATAAGGGAAAGAATAAGAAGAACTGATCCAGCAGCAGATGGGGTAGGAGCAGTATCTCGAGACCTGGAAAAACATGGGGCAATCACAAGTAGCAATACAAGGGGTACTAATGCTGACTGTGCCTGGCTAGAAGCACAAGAAGAGAGCGAGGAGGTGGGCTTTCCAGTCAGACCTCAGGTACCTTTAAGACCAATGACTTACAAAGGAGCGTTAGATCTTAGCCACTTTTTAAAAGAAAAGGGGGGAC
>D.TD.99.MN011_AJ488926_F2.CM.95.MP255_AJ249236
GAGAGAGATGGGTGCGAGAGCGTCAGTATTAAGCGGGGGAAAATTGGATGACTGGGAAAGAATTCAGTTACGGCCAGGGGGAAACAAAAAGTATAAGCTAAAACATATAGTATGGGCAAGCAGGGAGCTAGAACGATTTGCACTTAATCCTGGCCTTTTAGAGACATCAGATGGCTGTAAACAAATACTAGGCCAGCTACAGCCAGCTATTAAGACAGGATCAGAAGAACTTAGATCATTATTTAACACAGTAGCAACACTCTATTGTGTACATGAAAAGATACAGGTAAAGGACACCAAGGAAGCTTTAGATAAGATAGAGGAAGAACAAAACAAAAGTAAGAAAAAAGCACAGCAAGTACTAGCTGACACAGGAAACAGCAACCAGGTCAGCCACAATTACCCTATAGTGCAGAACTTACAGGGGCAAATGGTACACCAAGCCCTATCACCTAGAACCTTGAACGCATGGGTAAAAGTAATAGAGGAAAAGGCCTTCAACCCAGAAGTAATACCCATGTTTTCAGCCTTATCAGAAGGAGCCACTCCACAAGATTTAAACACCATGCTAAACACAGTGGGGGGACATCAAGCAGCAATGCAAATGTTAAAAGAGACCATCAATGAGGAAGCTGCAGAATGGGACAGGCTACATCCAGTGCATGCAGGGCCTGTTGCACCAGGCCAGATGAGAGAGCCAAGGGGGAGTGATATTGCAGGAACCACTAGTACCCTTCAGGAACAAATAGGATGGATGACAAGCAATCCACCTATTCCAGTAGGAGAAATCTATAAAAGATGGATAATCTTGGGATTAAATAAAATAGTAAGAATGTATAGCCCTGTCAGCATTTTGGATATAAGACAAGGACCAAAAGAACCCTTTAGAGATTATGTAGACCGGTTCTATAAAACTCTAAGAGCCGAGCAAGCTTCACAAGATGTAAAAAATTGGATGACAGAAACCTTGTTGGTCCAAAATGCAAACCCAGATTGTAAAACTATCTTAAAAGCATTGGGTCCAGGGGCCACATTAGAAGAAATGATGACAGCATGTCAGGGAGTGGGAGGGCCCAGCCATAAAGCAAGAATTCTGGCTGAGGCAATGAGCCAAGCAACAAGTAGCGCTGCTGCAATAATGATGCAGAGGGGCAATTTTAAGAACCCAAAGAGAATTGTTAAATGTTTCAACTGTGGCAAAGAAGGGCACATAGCAAAAAATTGCAGGGCCCCTAGGAAAAAGGGCTGTTGGAAATGTGGAAAGGAAGGACACCAAATGAAAGAGTGCACTGAAAGACAGGCTAATTTTTTAGGGAAAATTTGGCCTTCCAGCAAGGGAAGGCCGGGAAATTTTCTTCAGAGCAGACCAGAGCCAACAGCCCCACCAGCAGAGAGCTTCGGGTTTGGGGAAGAGATAACCCCCTCTCAGAAACAGGAGCAGAAGGACAAAGACAAGGAACTGTATCCTTTAGCTTCCCTCAAATCACTCTTTGGCAACGACCCCTTGTCACAATAAAAGTAGGGGGACAGCAAAAAGAAGCTCTATTAGACACAGGAGCAGATGATACAGTATTAGAAGACATAAATTTGCCAGGAAAATGGAAACCAAAAATGATAGGGGGAATTGGAGGTTTTATCAAAGTAAGACAATATGAGCAGATCCCTGTAGAAATCTGTGGACATACGGCTGTGGGTACAGTATTAGTAGGACCTACACCTGTCAACATAATTGGAAGAAATTTGTTGACCCAGATTGGATGCACTCTAAATTTTCCAATTAGTCCTATTGAAACTGTACCAGTAAAATTAAAGCCAGGAATGGATGGCCCAAAAGTTAAGCAATGGCCATTGACAGAAGAAAAAATAAAAGCATTAACAGAAATTTGTACAGAAATGGAAAAGGAAGGAAAAATTTCAAGAATTGGGCCTGAAAATCCATACAATACTCCAATATTTGCTATAAAGAAAAAAGACAGTACTAAGTGGAGAAAATTAGTAGATTTTAGAGAACTTAATAAGAGAACTCAAGACTTCTGGGAAGTTCAATTAGGAATACCGCATCCTGCAGGGCTGAAAAAGAAAAAATCAGTGACAGTACTAGATATAGGTGATGCATATTTTTCAGTTCCCTTAGATGCAGATTTTAGAAAATACACTGCATTCACTATACCTAGTATAAACAATGAGACACCAGGGACTAGATATCAGTACAATGTGCTTCCACAAGGGTGGAAGGGATCGCCAGCAATATTCCAATGTAGTATGACAAAAATCTTAGATCCCTTCAGAAAACAAAATCCAGAACTAGTTATCTATCAATACATGGATGATTTGTATGTAGGATCTGACTTAGAAATAGGGCAGCATAGAGCCAAAATAGAGAAATTAAGAGAACATTTATTGAAGTGGGGACTTACCACACCAGACAAAAAACATCAGAAAGAACCTCCATTTCTTTGGATGGGTTATGAACTCCATCCTGATAAATGGACAGTACAGCCTATAACACTACCAGAAAAAGAAAGCTGGACTGTCAATGATATACAGAAACTAGTGGGAAAATTAAATTGGGCAAGCCAGATTTATCCAGGAATTAAGGTAAAGCAATTATGTAGACTCCTTAGGGGAGCTAAAACATTAACAGAGGTAGTACCACTAACAAAAGAAGCAGAATTAGAACTGGCAGAAAACAGGGAGATTCTCAGAGAACCAGTGCATGGAGTGTATTATGACCCATCAAAAGACTTAATAGCAGAAGTACAAAAACAAGGGCAAGGCCAATGGACTTGGCAAATTTATCAAGAACCATTTAAAAATCTGAAAACAGGAAAGTATGCAAGAATAAAGGGTGCTCACACTAATGATGTAAAACAATTAACAGAGGCAGTGCAAAAAATATCCCTAGAAAGCATAGTGATATGGGGAAAGACTCCTAAATTTAGATTACCCATACAAAAGGAAACATGGGAAGCATGGTGGATGGAGTATTGGCAGGCCACTTGGATTCCTGAGTGGGAGTTTGTCAATACCCCTCCTTTAGTAAAATTATGGTATCAGTTAGAAAAGGAACCCATAATGGGAGCAGAAACTTTCTATGTAGATGGGGCAGCTAATAGAGAGACTAAATTAGGAAAAGCAGGATATGTTACTGACAGAGGAAGACAAAAAGTTGTCCCGTTTACTGACACCACAAATCAGAAGACTGAGTTACAAGCAATTAATCTAGCTTTGCAGGATTCGGGATCAGAAGTGAACATAGTAACAGATTCACAGTATGCATTAGGAATCATTCAAGCACAACCAGATAAAAGTGAATCAGAAATAGTCAGTCAAATAATAGAACAGTTAATAAAAAAGGAAAAGGTATACCTGGCATGGGTACCAGCACACAAAGGAATTGGAGGAAATGAACAAGTAGATAAATTAGTCAGTAGTGGAATCAGGAAAGTACTATTTTTGGATGGAATAAGTCAGGCTCAAGATGAACATGACAAATATCACAGCAATTGGAGAGCAATGGCTAGTGATTTTAACCTACCACCTGTGGTAGCAAAAGAAATAGTAGCTAGCTGTGATAAATGTCAAATAAAAGGAGAAGCCATGCATGGACAAGTAGACTGTAGTCCAGGAATATGGCAATTAGATTGTACACATCTAGAAGGACAAATTATCCTGGTAGCAGTTCATGTAGCCAGTGGCTATATAGAAGCAGAAGTTATCCCAGCAGAAACAGGACAGGAAACAGCCTACTTCATCCTAAAGTTAGCAGGAAGATGGCCAGTGAAAATAATACATACAGACAATGGCAGCAATTTCACCAGTACTGTGGTTAAGGCAGCCTGTTGGTGGGCAGGTATTAAGCAGGAATTTGGAATTCCCTACAATCCCCAAAGTCAAGGAGTAGTAGAATCTATGAATAAAGAATTAAAGAAAATTATAGAACAGGTAAGAGATCAAGCTGAACATCTTAAGACAGCAGTACAAATGGCAGTATTCATTCACAATTTTAAAAGAAAAGGGGGGATTGGGGGGTACAGTGCAGGGGAAAGAATAATAGACATAATAGCAACAGACATACAAACTAGAGAATTACAAAAACAAATCACAAAAATTCAAAATTTTCGGGTTTATTACAGGGACAGCAGAGATCCAATTTGGAAAGGACCAGCAAAGCTTCTCTGGAAAGGTGAAGGGGCAGTGGTAATACAAGAAAATAGTGACATAAAGGTAGTACCAAGAAGAAAAGCAAAGATCATTAGGGATTATGGAAAACAGATGGCAGGTGATGGTTGTGTGGCAAGTAGACAGGATGAGGATTAACACATGGAAAAGTTTAGTAAAATACCATATGTATGTGTCAAAGGAAGCTAAAGGATGGTTTTATAGACATCACTATGATAGCCCTCACCCAAAAATAAGTTCAGAAGTGCACATCCCATTAGGAGAAGCTAGACTGGTAGTAAAAACATATTGGGGTCTGAATACAGGGGAAAGAGATTGGCATCTGGGTCAGGGAGTCTCCATAGAATGGAGGAAAAGAAGATATAGCACACAAGTAGACCCTGGCCTGGCAGACCAACTAATTCATACGCATTACTTTGATTGTTTTTCAGACTCTGCTATAAGAAAAGCCATATTAGGACAGAGAGTTAGTCCTAGGTGTGATTATCAAGCAGGACATAACAAGGTAGGATCCTTACAGTATTTGGCACTAACAGCATTAATAAAGCCAAGAAAGAGAAAACCACCTTTGCCTAGTGTTAGGAAGTTAACAGAAGATAGATGGAACAAGCCCCAGCAGACCAAGGGCCACAGAGGGAGCCATACAATGAATGGACACTAGAACTTTTAGAGGAGCTCAAGAGTGAAGCTGTTAGACATTTCCCTAGGATATGGCTTCATGGCTTAGGACAACATATTTATGAAACTTATGGGGATACCTGGGCAGGAGTTGAAGCTCTAATAAGAATCCTGCAACAACTGATGTTCATTCATTTCAGAATTGGGTGTCGACATAGCAGAATAGGAATTCAGAGAACAGCAAGAGCAAGAAATGGACCCAGTAGATCCTAACTTAGAGCCCTGGAACCATCCAGGAAGTCAGCCAAGTACTTCTTGTAGCTCATGTTATTGTAAAATTTGTTGCTACCATTGCCAGCTTTGCTTCATAACAAAAGGCTTAGGCATCTCCTATGGCAGGAAGAAGAGAAGAAAACGACGAGGACTTCCTCAAGACAATAAGACTCATCAAGTGGCTGTACAAGAGCAGTGAGTAGTACATGTGATGCAACCTTTAGTGATATTAGCAATAGTAGCATTAGTAGCAGCGCTAATAATAGCAATAATTGTGTGGACCATAGTATACATAGAATATAGAAAAATAAAGAGGCAAAGAAAAATAGACTATCTAATTGATAGAATAATAGAAAGAGCAGAAGACAGTGGCAATGAGAGTGATGGAGATAAAGAGGAATTATCAACACTTATGGACATGGGGCACCCTGCTCCTTGGGCTGTTGTTGATGACCTATAGTGCAGCAGAGGATTCGTGGGTCACAGTATACTATGGGGTGCCTGTGTGGAAAGAAGCAAAAGCCACTCTATTTTGTGCATCAGATGCTAAATCAATTAAAACAGAGGCACATAATATCTGGGCTTCACATGCCTGTGTACCCACGGACCCCAGTCCCCAAGAAATAGAGCTGGAAAATGTCACAGAAAACTTTAACATGTGGAAAAATAACATGGTGGAGCAGATGCATGAGGATATAATCAGTTTATGGGATCAAAGCCTAAAACCATGTGTAAAATTAACCCCGCTCTGTGTTACTTTGAACTGCACTGATGTCAGCAACAATGTTACAGTGAGTAACAGCAGCTTAGGAGAGATGAAAAACTGCTCTTTCAATATAACCACAGTAGTAAGGGATAAGAAGAAGCAAGAATATGCACTTTTTTATAGACTTGATATAGTAGAAATGGGTGATAATGAGACAAGTGGAACTTATAGATTAATAAATTGTAATACCTCAGCCATTACACAGGCTTGTCCAAAGGTATCCTTTGAGCCAATTCCCATACATTATTGTGCCCCAGCTGGTTTTGGGATTCTAAAATGTAATGATAAGAAGTTCAATGGAACAGGTCCATGTACAAATGTCAGCACAGTACAGTGTACACATGGAATCAAGCCAGTGGTGTCAACTCAATTTCTATTAAATGGCAGTCTGGCAGAAGAAGAGATCGTGATTAGATCTGAAAATCTCACAGACAATACTAAAAACATAATAGTGCAGCTTAATGAAACTATAAACATTACTTGTATAAGGCCCAACAATAATACAAGAAGAAGTGTACATATAGGACCAGGGCAAGCACTCTATACAACAAATGTAATAGGAGATATAAGACAAGCACATTGTAATATTAGTGGAGCAAAATGGAATAACACTCTACAAGAGGTAGCTAGAAAATTAGGAGCAGCTCTTAACACCACACAAATAATTTTTAAACCATCCTCAGGAGGGGACCCAGAAATAACAACACACAGTTTTAATTGTGGAGGGGAATTTTTTTACTGCAATACATCAAAACTGTTTGATAGAGAATTTAACATAACAGGGAATAATAGTACTAACAATAGTACAGATGATACAATAACCATCCCATGCAGAATAAAACAAATTATAAACATGTGGCAGGGAGTAGGAAAAGCAATGTATGCCCCTCCCATCGCAGGACAAATTAAATGTTCATCAAATATTACAGGGCTACTATTGACAAGAGATGGTGGTAAAAATGCTTCTAATGAGACCTTCAGACCTGGAGGAGGAGATATGAGGGACAATTGGAGAAGTGAATTATATAAATATAAAGTAGTAAGAATTGAACCACTAGGAGTAGCACCCACCAAGGCAAGGAGAAGAGTGGTGGAAAGAGAAAAAAGAGCAATAGGATTAGGAGCTATGTTCCTTGGGTTCTTGGGAGCAGCAGGAAGCACGATGGGCGCAGCGTCAGTGACGCTGACGGTACAGGCCAGACAATTATTGTCTGGTATAGTGCAACAGCAAAACAATTTGCTGAGGGCTATAGAGGCGCAACAGCATCTGTTGCAACTCACGGTCTGGGGCATTAAACAGCTCCAGGCAAGACTCCTGGCTGTGGAAAGATACCTAAAGGATCAACAGCTCCTAGGAATTTGGGGTTGCTCTGGAAAACACATTTGCACCACTACTGTGCCTTGGAACTCTAGTTGGAGTAATAGATCTCTAAATGATATTTGGCAAAACATGACCTGGATGCAATGGGAAAAAGAAATAGAAAATTACACAGGTGTAATATACAACTTAATTGAAGAATCACAAATCCAGCAAGAGAAAAATGAAAAAGAATTATTAGAATTGGACAAGTGGGCAAGTTTGTGGAATTGGTTTAACATAAGTCAATGGCTGTGGTATATAAAAATATTCATCATGATAGTAGGAGGCTTAATAGGTTTAAGAATAGTTTTTGCTGTGCTTTCTATGGTAAATAGAGTTAGGCAGGGATACTCACCCCTGTCATTACAGACCCTCCTCCCAGCACCGAGGGGACCCGACAGGCCCGAAGGAATAGAAGAAGAAGGTGGAGAGCAAGACAGAGGCAGATCCATTCGATTGGTGAACGGATTCTCAGCACTTATCTGGGACGATCTGCGGAACCTGTGTCTCTTCAGCTACCACCAATTGAGAGACTTAATCTTAATTGCAGCGAGGACTGTGAACCTTCTGGGACGCAGGGGGTGGGAAGCTCTCAAATATCTGTGGAATCTCCTACAGTATTGGAGTCGGGAACTGAAGAATAGTGCCATTAGCTTGCTTGACGCCACAGCAATAGCAGTAGCTGAGGGGACAGATAGGATTATAGAAATAGTACAAAGAGCTGCTAGAGCTATTCTTAACATACCCAGAAGAATAAGACAGGGATTAGAAAGAGCTTTACTATAAAATGGGTGGCAAATGGTCAAAAAGTAGTATAGTTGGATGGCCTGCTATAAGGGAAAGAATAAGAAGAACTGATCCAGCAGCAGAGGGGGTAGGAGCAGTATCTCGAGATCTGGAAAGACATGGGGCAATCACAAGTAGCAATACAGCAACTACTAATGCTGCCTGTGCCTGGCTAGAAGCACAAGAAGGTGAGGAGGTGGGTTTTCCAGTCAGACCTCAGGTACCTTTAAGACCAATGACTTTCAAGGCAGCTGTAGATCTTAGCCACTTTTTAAAAGAAAAGGGGGGACTGGAAGGGCTAGTTTGGTCCCAAAAAAGACAAGATATCCTTGATCTTTGGGTCTACCACACACAAGGCTACTTCCCTGATTGGCAGAACTACACACCAGGGCCAGGGACCAGATATCCACTGACCTTTGGGTGGTGCTTCGAGCTAGTACCAGTTGACCCCAAGGTGGTAGAAGAGGAGACTGAAGGAGAGAACAACTGTTTGCTACACCCTATGAACCAGCATGGAGGGGACGACCCGGAGAAAGAAGTGCTAGTGTGGAGATTTAACAGCAGACTAGCATTTGAACACAAAGCCAAAGAGAAGCATCCGGAGTTCTTTAAAGACTGCTGACACCGAGTAAAGACTGCTGACACCAAGCCTTCTACAAGGGACTTTCCACTGGGGACTTTCCAGGGGAGGTGTGGCCTGGGCGGGACTGGGGAGTGGCCAACCCTCAGATGCTGCATATAAGCAGCTGCTCTTTGCCTGTACTGGGTCTCTCTGGTTAGACCAGATCTGAGCCTGAGAGCTCTCTGGCTAGCTAGGGAACCCACTGCTTAAGCCTCAATAAAG
>D.UG.98.98UG57143_AF484514_G.CM.01.01CM_4049HAN_AY371121
GCGAGAGCGTCAATATTAAGCGGGGGAAAATTAGATGCATGGGAAAAAATTCGATTAAGGCCAGGGGGAAAGAAAAAATATAGACTGAAACATCTAGTATGGGCAAGCAGGGAACTAGACCGATTTGCACTTAATCCTGGCCTTTTAGAGACATCAGAAGGCTGTAGACAACTCATAGGACAGCTACAACCAGCCATTCAGACAGGATCAGAAGAACTTAGATCATTGTTTAATACAATAGCAACCCTATATTGTGTACATGAGAAAATAGAGGTAAAGGACACCAAGGAAGCCTTAGAAAAGATAGAGGAAGAACAAAACAAAAGTAAGAAAAAGGCACAGCAGGCAACAGCTGACACAAGGAACAGCGGCCAGGTCAGCCAAAATTATCCTATAGTACAAAACCTACAGGGACAAATGGTACACCAGTCCTTATCACCTAGAACTTTGAACGCATGGGTAAAAGTAATAGAAGAGAAGGCTTTCAGCCCCGAAGTGATACCCATGTTTACAGCATTATCAGAAGGAGCCACCCCACAAGATTTAAACACCATGCTGAACACAGTGGGGGGACATCAAGCAGCCATGCAAATGTTAAAAGAGACCATCAATGATGAAGCTGCAGAATGGGATAGGCTACATCCAGTGCAGGCAGGGCCTGTTGCACCAGGCCAGATGAGAGAACCAAGGGGAAGTGATATAGCAGGAACTACTAGTAGCCTTCAGGAACAAATAGGGTGGATGACAAGCAATCCACCTATCCCAGTAGGAGAAATCTATAAAAGATGGATAATCCTGGGATTGAATAAAATAGTAAGAATGTATAGTCCTGTCAGCATCTTGGACATAAGACAAGGACCAAAGGAACCCTTTAGAGACTATGTAGATCGGTTCTATAAAACTCTAAGAGCCGAGCAAGCTTCACAGGAGGTAAAAAGTTGGATGACTGAAACCTTATTGGTCCAAAATGCGAACCCAGACTGTAAAACTATCTTAAAATCATTGGGAACAGGGGCTACATTAGAAGAAATGATGACAGCATGTCAGGGAGTAGGGGGACCCAGTCATAAAGCAAGAGTCTTGGCTGAGGCAATGAGCCAAGCAACAAGTGCAAATGTTGCCATAATGATGCAGAGAGGCAATTTTAAGGGCCCAAAGAGAATCATTAAGTGTTTCAACTGTGGCAAAGAAGGACATATAGCAAAAAATTGCAGGGCCCCTAGGAAAAAGGGCTGTTGGAAATGTGGAAGGGAAGGACACCAAATGAAAGATTGCACTGAAAGACAGGCTAATTTTTTAGGGAAAATTTGGCCTTCCCACAAGGGGAGGCCGGGCAACTTCCTTCAGAGCAGACCAGAGCCAACAGCCCCACCAGCAGAGAGCTTCGGGTTTGGGGAAGAGATAGCCCCCTCTCAGAAAATAGCACAGGAAGACAAGGGACTGCAACCTTTAACTTCCCTCAAATCACTCTTTGGCAACGACCCATTGTTACAATAAAGATAGGGGGACAGCTAAAGGAAGCTCTATTAGATACAGGAGCAGATGATACAGTACTAGAAGAAATGAATTTGCCAGGAAAATGGAAACCAAAAATGATAGGGGGGATTGGAGGTTTTATCAAAGTAAGACAGTATGACCAAATACCCATAGAAATCTGTGGACACAAAGCTATAGGTACAGTATTAATAGGACCTACACCTGTCAACATAATTGGAAGAAATTTGTTGACTCAGATAGGATGTACTTTAAATTTTCCAATCAGTCCTATTGAAACTGTACCAGTAAAATTAAAACCAGGGATGGATGGTCCAAAAGTTAAACAATGGCCATTGACAGAAGAAAAAATAAAAGCACTAACAGAAATTTGTACAGAGATGGAAAAAGAAGGAAAAATTTCACGAATTGGGCCTGAAAATCCATACAATACCCCAATATTTGCCATAAAGAAAAAAGACAGTACTAAATGGAGAAAATTAGTAGATTTCAGAGAACTTAATAAGAGAACTCAAGATTTCTGGGAAGTTCAACTAGGAATACCGCATCCTGCAGGGCTAAAAAAGAAAAAATCAGTAACAGTACTGGATGTGGGTGATGCATATTTTTCAGTTCCCTTACATGAAGACTTTAGAAAGTATACCGCATTCACCATACCTAGTACAAACAATGAGACACCAGGGGTTAGATATCAATACAATGTGCTTCCACAAGGATGGAAAGGATCACCAGCAATATTCCAAAGTAGCATGACAAAAATCCTAGAACCTTTCAGAAAACAAAATCCAGAAATGGTTATCTATCAATACATGGATGATTTGTATGTAGGATCGGACTTAGAAATAGGGCAGCATAGAACAAAAATAGAGGAATTAAGGGAACATCTATTAAGGTGGGGATTTACCACACCAGATAAAAAACATCAGAAAGAACCTCCATTTCTTTGGATGGGTTATGAACTCCATCCGGATAAATGGACAGTGCAACCTGTAGTATTGCCAGAGAAAGAAAGCTGGACTGTCAATGATATACAGAAGTTAGTGGGGAAATTAAATTGGGCAAGCCAAATTTATCCAGGAATTAAAGTAAGACAATTATGTAAACTTCTTAGGGGAGCCAAGGCACTGACAGAAGTAATATCACTGACAGAAGAAGCAGAATTAGAACTGGCAGAAAACAGGGAGATTTTAAAAGAACCAGTCCATGGAGTGTATTATGACCCATCAAAAGACTTAATAGCAGAAATACAGAAACAAGGGCAAGGCCAATGGACATATCAAATTTATCAAGAACCATTTAAAAATCTGAAAACAGGAAAGTATGCAAAAATGAGGGGTGCCCACACTAATGATGTAAAACAATTAACAGAGGCAGTGCAAAAAATATCCCATGAATGCATAGTGATATGGGGAAAGACTCCTAAATTTAGACTACCCATACAAAAGGAAACATGGGAAGCATGGTGGATAGAGTATTGGCAGGCCACCTGGATTCCTGAGTGGGAGTTTGTCAATACCCCTCCTTTAGTTAAATTATGGTATCAGTTAGAGAAGGAACCTATAATAGGAGCAGAAACTTTCTATGTAGATGGGGCAGCTAATAAAGAGACTAAATTAGGAAAAGCAGGATATGTTACAGACAGAGGAAGACAGAAAGTTGTCCCTCTAACTGACACAACAAATCAGAAGACTGAGCTACAAGCCATTAATCTAGCTTTGCAGGATTCAGGATTAGAAGTAAACATAGTAACAGATTCACAATATGCATTGGGAATCATTCAGGCACAACCAGATAAGAGTGAATCAGAATTAGTCAGTCAAATAATAGAGCAGCTAATAAAAAAGGAAAAGGTCTACCTGGCATGGGTACCAGCACACAAGGGGATTGGAGGAAATGAACAAGTAGATAAGCTAGTCAGTAATGGAATCAGGAAGATACTATTTTTGGATGGAATAGATAAGGCTCAAGAAGAACATGAGAAATACCACAACAATTGGAGAGCAATGGCTAGTGATTTTAACCTACCACCTGTGGTAGCGAAAGAAATAGTAGCTAGCTGTGATAAATGTCAGCTAAAAGGAGAAGCCATGCATGGACAAGTAGACTGTAGCCCAGGAATATGGCAATTAGATTGTACACATTTAGAAGGAAAAGTTATCCTGGTAGCAGTTCATGTAGCCAGTGGTTATATAGAAGCAGAAGTGATTCCAACAGAAACAGGGCAGGAAACAGCCTACTTTATCTTAAAACTAGCAGGAAGATGGCCAGTAAAAGTAGTACATACAGACAATGGCGGCAATTTCATCAGTGCTGCAGTTAAGGCCGCCTGCTGGTGGGCAGGCATTAAGCAGGAATTTGGAATTCCCTACAATCCCCAAAGTCAAGGAGTAGTGGAATCTATGAATAAAGAATTAAAGAAAATTATAGGACAGGTAAGAGATCAAGCTGAACATCTTAAGACAGCAGTACAAATGGCAGTATTCATCCACAATTTTAAAAGAAAAGGGGGGATTGGGGGGTACAGTGCAGGGGAAAGAATAATAGACATAATAGCAACAGACATACAAACTAAAGAACTACAAAAACAAATCATAAAAATTCAAAATTTTCGGGTTTATTACAGGGACAGCAGAGATCCAATTTGGAAAGGACCAGCAAAGCTTCTCTGGAAAGGTGAAGGGGCAGTAGTAATACAGGACAATAACGACATAAAGGTAGTACCAAGAAGAAAAGCAAAGATCATTAGGGATTATGGAAAACAGATGGCAGGTGATGATTGTGTGGCAAGTAGACAGGATGAGGATTAGAACATGGAAAAGTTTAGTAAAACACCATATGTATATTTCAAAGAAAGCTCAAGGATGGTTGTATAGACACCACTATGACAGCCCTCACCCAAAAATAAGTTCAGAAGTACACATCCCACTAGGAGAAGCTAGATTGGTAGTAAAAACATATTGGGGTCTGCATACAGGAGAAAGAGAATGGCATCTGGGTCAGGGAGTCTCCATAGAATGGAGGAAAAGGAGATATAGCACACAAGTAGACCCTGGCCTGGCAGACCAACTAATTCATATGTATTATTTTGATTGTTTTGCAGAATCTGCTATAAGACAAGCCATATTAGGACATATAGTTAGTCCTAGGTGTGATTATCAAGCAGGACATAACAAGGTAGGATCTTTACAGTATTTGGCACTAACAGCATTAATAAAACCAAAAAAGATAAAGCCACCTTTGCCTAGTGTGAGGAAGCTAACAGAAGATAGATGGAACAAGCCCCAGAAGACCAAGGGCCACAGAGGGAGCCGAACAATGAATGGACTTTAGAGCTTTTAGAGGAGCTCAAGAGTGAAGCTGTGAGACACTTTCCTAGGGGATGGCTCCATAGCTTAGGACAGTACATCTATGAAACTTATGGGGATACCTGGGCAGGAGTTATAGCTCTAATAAGAATCCTGCAACAACTACTGTTTATTCATTTCAGAATTGGGTGTCACCATAGCAGAATAGGCATTATTCCACAGAGAAGAACAAGAAATGGATCCAGTAGATCCTAAACTAGAGCCCTGGAACCATCCAGGAAGTCAGCCCGGGACTCCTTGTAACAAATGTTATTGTAAAAAGTGTTGCTATCATTGCCAAGTTTGCTTCTTAACAAAAGGCTTAGGCATCTCCTATGGCAGGAAGAAGCGGAGCCAGCGACGAAGACCTCATCAGGGTGGTCAGGCTTATCAAGATCCTCTACCAAAGCAGTAAGTAGTACATGTAATGCAATCTTTAGTGATATTAGCAATAGTAGCATTAGTAGTAGCATTAATAATAGCAATAGTTGTGTGGACTATAGTATTTATAGAGTGTAGGAGATTAAAAAGGCAAGAGAAAATAGATTGGTTAATTGATAGAATAAGAGAAAGAGCAGAAGATAGTGGCAATGAGAGTGATGGGGACAGAGAGGAACTATCAGGACTTGTGGAGATGGGCCATCATGCTCCTTGGGATGTTGATGACATGTAGTGTTGCAGAAAAGTGGGTCACAGTTTATTATGGGGTACCTGTGTGGAGAGAAGCAGACACCACTCTATTTTGTGCATCAGATGCTAAAGCATATAAAACAGAGGCACATAATATCTGGGCTACACATGCCTGTGTACCAACAGACCCCAATCCACAAGAAATAGCACTGGAAAATGTCACTGAGAATTTTAATATGTGGAAAAATAACATGGTGGAGCAGATGCATGAGGATATAAAAAGTTTATGGGATCAAAGCCTAAAACCATGTGTAAAATTAACCCCACTCTGTGTCACGTTAAACTGCACTGATGCTCAAGGGGAACTGATGAAGGAAGACATGAAAAACTGCTCTTTCAATACAACCACAGTATTAAGAGATAAGCAGCAGAAAGCATATGCACTTTTTTATAGACTTGATTTGGTACAACTAAATAATACCAATGATAATACCAATTATACCAGTTATATATTAATAAATTGCAATACTTCAACCATTACACAGGCTTGTCCAAAGGTATCCTTTGAGCCAATTCCCATACATTATTGTGCCCCAGCTGGTTTTGCGATTCTAAAGTGTAACGATAAGCAGTTCAATGGAACAGGCCCATGCAAGAATGTCAGCACAGTACAATGTACACATGGAATTAAGCCAGTGGTGTCAACTCAACTGCTGTTGAATGGCAGTCTAGCAGAAGAAAACATAATAATTAGATCTGAAAATATCACAGACAATGCTAAAACAATAATAGTACAGTTTACGGAGGGTGCACAAATTAATTGTACAAGGCCCTCCAACAATACAAGACAGAGCATACATATAGGACCAGGGCAAGCACTCTTTGCAAACAAGATAATAGGAGATATAAGACAAGCACATTGTAATATTAATGGAACACAATGGAACAAAACTTTACAACAGGTAGCTAAAAAATTAGGAGACCTTTTTAACCAGACAATAATTTTTAATTCATCCTCAGGAGGGGACCCAGAAATTACAACACACAGCTTTAATTGTGGAGGGGAATTTTTCTACTGCAATACATCAAAACTGTTTAATAGTACCTGGAATAATGGTACAGTAAATAGTACAGATACAGTAAATAGTATAATCACAATCCCATGCAGAATAAAACAAATTATAAACATGTGGCAGGAAGTAGGAAAAGCAATGTATGCCCCTCCCATAGAAGGACTAATCATGTGTAATTCAAATATTACAGGGCTATTACTGACAAGAGATGGTGGTATAAATACTAGTGATGAGAATGAGACTTTCAGACCTGGAGGAGGGAATATGAAAGATAATTGGAGAAGTGAATTATACAAATATAAGGTGGTAAGAATTGAACCACTAGGAATAGCACCCACCACGGCGAAGAGGAGAGTGGTGGAAAGAGAAAAAAGAGCAATAGGATTAGGAGCTTTGTTCCTTGGGTTCTTGGGAGCAGCAGGAAGCACGATGGGCGCAGCGTCATTGACGCTGACGGTACAGGCCAGACAATTATTGTCTGGTATAGTGCAACAGCAAAACAATTTGCTGAGGGCTATAGAGGCGCAACAGCATCTGTTGCAACTCACAGTCTGGGGCATTAAACAGCTCCAGGCAAGAGTCCTGGCTGTGGAAAGATACCTACAGGATCAACAGCTCCTAGGAAGTTGGGGTTGCTCTGGAAGACACATTTGCACCACTACTGTGCCCTGGAACTCTAGTTGGAGTAATAAATCTATAGATGAGATTTGGAATAACATGACTTGGATGGAGTGGGAAAAAGAAATTGCCAATTACACAGATTTAATATACACATTAATTGAGGAATCGCAAACCCAGCAAGAAAAGAATGAACAAGAACTATTGCAATTGGACAAATGGGCAAGTCTGTGGAATTGGTTTAGCATAACAAACTGGCTGTGGTATATAAAAATATTCATAATGATAGTAGGGGGCTTGATAGGATTAAGAATAGTTTTTACTGTGCTTTCTTTAGTAAATAGAGTTAGGCAGGGATACTCACCTCTATCGTTTCAGACCCTCTTCCCAGCCCCGAGGGAACCCGACAGGCCCGAAGGAATAGAAGAAGAAGGTGGAGAGCAAGGCAGAGGCAGATCCATTCGCTTGGTGAACGGATTCTCAGCACTTATCTGGGACGATCTGAGGAACCTGTGCCTCTTCAGTTACCACCGCTTGAGAGACTTAATCTTAATTGCAACGAGGATTGTGGAACTTCTGGGACGCAGGGGGTGGGAGGCCCTCAAATATCTGTGGAATCTCCTGCAGTATTGGATTCAGGAACTGAAGAATAGTGCTATTAGCTTGCTTAATACACTAGCAATAGCAGTAGCTAATTGGACAGATAGGGTTATAGAAGTAGCACAAGGAGCTGGTAGAGCTATTCTCCACATACCTAGAAGAATAAGACAAGGCTTAGAAAGAGCTTTGCTATAAAATGGGAGGCAAGTGGTCAAAAAGTAGATGGCTGGGTGGCCTACTATAAGGGAAAGGATAAGAAGAACTGATCCAGCAGAGCCAGCAGCAGAGGGGGTGGGAGCAGTATCTCGAGACCTGGAAAAATATGGGGCAATCACAAGTAGCAATACAGTAGAGACTAATCCTGACTGTGCCTGGCTAGAAGCGCAACAAGAGGATGAGGAGGTGGGTTTTCCAGTTAGACCTCAGGTACCATTAAGACCAATGACTTACAAAGGAGCTTTAGATCTAAGCCATTTTTTAAAAGAAAAGGGGGGACTGGATGGGTTAATTTGGTCCCAGAAAAGACAAGATATCCTTGATCTTTGGGTCTACAACACACAAGGCTACTTCCCTGATTGGCATAACTACACACCAGGGCCAGGGCCTAGATATCCACTGACCTTTGGATGGTGCTTCGAGCTAATACCAGTTGATCCAAAGGAGGTAGAAGAGGCCGCTGAAGGAGAGAACAACTGCTTGTTACACCCTATAAACCAGCATGGAATGGAGGACCCGGAGAGAGAAGTGTTGGTGTGGAAATTTAACAGCAGGCTAGCATTTGAACACATGGCCCGAATGAAGCACCCAGAGTTCTACAAAAACTGCTGACACCGAGAACTGCTGACACCGAGTTTCTACAAGGGACTTTCCGCTGGGGACTTTCCAGAGAGGCGTAACCGGGGCGGGACTGGGGAGTGGTCAACCCTCAGATGCTGCATATAAGCAGCTGCTTTTTGCCTGTACTGGTTCTCTCTAGTTGGACCAGATTTGAGCCTGAGAGCTCTCTGGCTAGCTAGGGAACCCACTGCT
>D.KE.93.MB2059_AF133821_H.CF.90.056_AF005496
ATTATGCTGTGTTGGATGCAAGGCATTGTATGTCTGATCCTTGATCTTTGGGTCTACCACACACAAGGCTTCTTCCCTGATTGGCAAAACTACACACCAGGGCCAGGGGTTAGATTTCCACTGACCTTTGGATGGTGCTTTGAGCTAGTACCAGTTGAACCAGAGAAGGTGGAAGAGCTCACTGAAGGAGAGAACAACTGCTTGTTACACCCTGTGTGCCAACATGGAATGGAGGACCCGGAGAGAGAAGTGTTAAGATGGAGATTCAACAGTAGACTAGCATTTGAACACAAGGCCAAAATAATGCATCCGGAGTACTTCAAAGACTGCTGACACTGAGTTTTCTACAAGGGACTTTCCGCTGGGGACTTTCCAGGGAGGCGTAACAGGGGCGGGACTGGGAGTGGCTAACCCTCAGATGCTGCATATAAGCAGCTGCTTTTTGCCTGTACTGGGTCTCTCTTGTTAGACCAGATTTGAGCCTGAGAGCTCTCTGGCTAGCTAGGGAACCCACTGCTTAAGCCTCAATAAAGCTTGCCTTGAGTGACTCAAGCAGTGTGTGCCCATCTGTTGTGTGACTCTGGTAACTAGAGATCCCTCAGACCTCTTTAGTCAGTGTAAAAAATCTCTAGCAGTGGCGCCCGAACAGGGACTTGAAAGCGAAAGTAGAACCAGAGGAGCTCTCTCGACGCAGGACTCGGCTTGCTGAAGCGCGCACAGCAAGAGGCGAGGGGCAGCGAACGGTGAGTACGCTAAACAACTTTTGACTAGCGGAGGCTAGAAGGAGAGAGATGGGTGCGAGAGCGTCAGTATTAAGCGGGGGAAAATTAGATGCCTGGGAAAAAATCCGGTTACGGCCAGGGGGAAGGAAAAAATATCGTCTAAAACATATAGTATGGGCAAGCAGGGAGCTAGACCGATTCGCACTTAATCCTGGCCTTTTAGAAACATCAGAAGGCTGTAAACAAATCATGGAACAGCTACAACCAGCTATTAAGACAGGATCAGAGGAACTTAAATCATTATATAATACAGTAGCAACCCTCTATTGTGTACACAAAAGAATACAGGTAACAGACACCAAGGAAGCTTTAGACAAGATAGAGGAAGAACAAACCAAAAGTAAGAAAAAAGCACAGCAAGCAACAGCTGACACAGGAAGCAGCAGCCAGGTCAGCCAAAATTATCCTATAGTGCAAAACCTACAGGGGCAAATGGTACACCAGGCCATATCACCTAGAACTTTGAACGCATGGGTCAAAGTAATAGAGGAGAAGGCTTTCAGCCCAGAAGTAATACCCATGTTTACAGCATTATCAGAAGGAGCCACCCCACAAGATTTAAACACCATGCTAAACACAGTGGGGGGACATCAAGCAGCCATGCAAATGTTAAAAGAGACCATCAATGAGGAAGCTGCAGAATGGGATAGGCTACATCCAGTGCATGCAGGGCCTAATGCACCAGGCCAAATGAGAGAACCAAGGGGAAGTGATATAGCAGGAACTACTAGTAGCCTTCAGGAACAAATAGGATGGATGACAAGCAATCCACCTATCCCAGTAGGAGAAATCTATAAAAGATGGATAATCCTAGGATTAAATAAAATAGTAAGAATGTATAGCCCTGTCAGCATTTTGGACATAAGACAAGGACCAAAGGAACCCTTTAGAGACTATGTAGATCGGTTCTATAAAACTCTAAGAGCTGAGCAAGCTTCACAGGATGTAAAAAATTGGATGACCGAAACCTTGTTGGTCCAAAATGCGAACCCAGATTGTAGAACTATCTTAAAAGCATTGGGACCAGCGGCTACATTAGAAGAAATGATGACAGCATGTCAAGGAGTGGGGGGACCTGGTCATAAAGCAAGAGTTTTGGCTGAGGCAATGAGCCAAGTAACAACTGGAAATGCTAATATAATGATGCAGAGAGGCAATTTTCAGAACCGAAAGAAAATCATTAAGTGTTTCAACTGTGGCAAAGAAGGGCACATAGCAAAAAATTGCAAGGCTCCTAGAAAAAGGGGCTGTTGGAAATGTGGAAGGGAAGGACACCAAATGAAAGATTGCACTGAAAGACAGGCTAATTTTTTAGGGAAAATCTGGTCTTCCCCACAAGGGAAGGCCAGGGAACTTCCTTCAGAGCAGACCAGAGCCAACAGCCCCTCCAATAGAGAGCTTCGGGTTTGGGGAGGAGATAACACCCTCTCAGAAACAGGAGCAGACAGACAAGGAGCTGTATCCCTTAGCCTCCCTCAAATCACTCTTTGGCAACGACCCGTCGTCACAGTAAAGGTAGGGGACAGCTAAAGGAAGCTCTATTAGATACAGGAGCAGATGATACAGTATTAGAAGAAATAAATTTGCCAGGAAAATGGAAACCAAAAATGATAGGGGGAATTGGAGGCTTTATCAAAGTAAGACAGTATGATCAAATACTAGTAGAAATCTGTGGACGTAAAGCTATAGGTACAGTATTAGTAGGACCTACACCTGTCAACATAATTGGAAGAAATTTGTTGACTCAAATTGGTTGCACTTTAAATTTTCCAATTAGTCCTATTGAAACTGTACCAGTAAAATTAAAGCCAGGGATGGATGGCCCAAAAGTTAAACAATGGCCGTTGACAGAAGAAAAAATAAGAGCACTAACAGATATTTGTACAGAAATGGAAAAGGAAGGAAAAATTTCAAGAATTGGGCCTGAAAATCCATACAATACTCCAATATTTGCCATAAAGAAAAAAGACAGTACTAAGTGGAGAAAATTAGTAGATTTCAGAGAGCTTAATAAGAGAACTCAAGACTTCTGGGAAGTTCAACTAGGAATACCACATCCCTGCAGGGCTAAAAAAGAAAAAATCAGTAACAGTACTGGATGTGGGTGATGCATACTTTTCAGTTCCCTTATATGAAGAATTTAGAAAATACACCGCATTCACCATACCTAGTATAAACAATGAGACACCAGGGATTAGATATCAGTACAATGTGCTTCCACAAGGATGGAAAGGATCACCGGCAGTATTCCAAAGTAGCAATGACAAAAATCTTAGAACCTTTTAGAAAACAAAATCCAGAAATGGTTATCTATCAATACATGGATGATTTGTATGTAGGATCTGACTTAGAAATAGGGCAACATAGAGCAAAAATAGAGGAGTTAAGAGCTCATTTGTTGAAATGGGGATTTACCACACCAGACAAAAAACATCAGAAAGAACCCCCATTTCTTTGGATGGGATATGAACTCCATCCTGACAAATGGACAGTACAGCCTATAAAGCTGCCAGAAAAAGAAAGCTGGACTGTCAATGATATACAGAAGCTAGTGGGGAAATTAAATTGGGCAAGCCAGATTTATCCAGGAATTAGAGTAAGACAATTATGCAAATGCCTTAGGGGAGCTAAAGCACTGACAGAAGTAGTACCACTGACAGAAGAAGCAGAGTTAGAACTGGCAGAAAACAGGGAAATTCTAAAGGAACCAGTACATGGAGTATATTATGACCCAGCAAAAGACTTAATAGCAGAAATACAGAAACTAAGGCAAGAAAAATGGACATATCAAATTTTTCAAGAACAATACAAAAATCTGAAAACAGGAAAGTATGCAAAAATGAGGGGTACCCACACTAATGATGTAAAACAATTAACAGAGGCAGTGCAAAAAGTAGCCCAAGAATGTATAGTCATATGGGGAAAGACTCCTAAATTTAGACTACCTATACAAAAGGAAACATGGGAAACATGGTGGGCAGAGTATTGGCAGGCCACCTGGATTCCTGAGTGGGAGTTTGTCAATACCCCTCCTTTAGTTAAATTATGGTACCAGTTAGAGAAGGAACCCATAATAGGAGCAGAAACTTTCTATGTAGATGGGGCAGCTAATAGAGAAACTAAATTAGGAAAAGCAGGATATATTACTGACAGAGGAAGACAGAAAGTTGTCTCTCTAACTGACACAACAAATCAGAAGACTGAATTACAAGCCATTAATCTAGCTTTACAGGATTCAGGAGTAGAAGTAAACATAGTGACAGACTCACAATATGCATTAGGAATCATTCAAGCACAACCAGATAAAAGTGAGTCAGAGTTAGTCAATCAAATAATAGAGCAGTTAATAAAAAAGGAAAAGGTCTACCTATCATGGGTACCAGCACACAAGGGGATTGGAGGAAATGAACAAGTAGATAAATTAGTCAGCAATGGAATCAGAAAAATATTATTCTTAGATGGGATAGATAAGGCTCAAGAAGAACATGAGAAATACCACAACAATTGGAGAGCAATGGCTAGTGATTTTAACCTGCCACCTGTGGTAGCAAAAGAAATAGTAGCTAGCTGTGATAAATGTCAGCTAAAAGGAGAAGCCTTGCATGGACAAGTAGACTGTAGTCCAGGTATATGGCAATTAGATTGTACACATTTAGAAGGAAAAGTTATCCTGGTAGCAGTCCATGTAGCCAGTGGCTATATAGAAGCGGAAGTTATTCCAGCAGAAACAGGGCAGGAAACAGCCTACTTTCTCTTGAAATTAGCAGGAAGATGGCCAGTAAAAGTAGTACATACAGACAATGGCAGCAATTTCACCAGTGCTGCAGTTAAGGCTGCCTGTTGGTGGGCAGGCATCAAACAGGAATTTGGAATTCCCTACAATCCCCAAAGTCAAGGGGTAGTAGAATCTATGAATAAAGAATTAAAGAAGATTATAGGACAGGTAAGAGACCAAGCTGAACATCTTAAGACAGCAGTACAAATGGCAGTATTCATCCACAATTTTAAAAGAAAAGGGGGGATTGGGGGGTACAGTGCAGGGGAAAGAATAATAGACATAATAGCAACAGACATACAAACTAAAGAATTACAAAAACAAATCATAAAAATTCAAAATTTTCGGGTTTATTACAGGGACAGCAGAGATCCAATTTGGAAAGGACCAGCAAAACTTCTCTGGAAAGGTGAAGGGGCAGTAGTAATACAAGACAATAGTGAAATAAAGGTAGTACCAAGAAGAAAGGTAAAGATCATTAGGGATTATGGAAAACAGATGGCAGGTGATGATTGTGTGGCAAGTAGACAGGATGAGGATTAGACAATGGAAGAGTTTAGTAAAACATCATATGTATGTTTCAAAGAGAGCTCAAGGATGGCTGTATAGACATCACTATGAATGCCCAAATCCAAAAACAAGTTCAGAAGTACACATCCCACTAGGAGAAGCTAGACTGGTAGTAAAAACATATTGGGGTCTGCATACAGGAGAAAGAGAATGGCATCTGGGTCAGGGAGTCTCCATAGAATGGAGGAAAAGGAGATATAGCACACAAGTAGACCCTGGCCTGGCAGACCAACTAATTCATATACATTATTTTGATTGTTTTGCAGAATCTGCTATAAGGAAAGCCATATTAGGACATATAGTTACTCCTAGGTGTAATTATCAAGCAGGACATAACAAGGTAGGATCTTTACAATATTTGGCACTAACAGCATTGTTAACACCAAAAAAGATAAAACCACCTTTGCCTAGTGTTAGGAAGCTGACAGAAGATAGATGGAACAAGCCCCAGAGGACCAAGGACCACAGAGGGAGCCATACAATGAATGGGCATTAGAGCTTTTAGAGGAGCTTAAAAGTGAAGCTGTTAGACACTTTCCTAGGATATGGCTTCATAGCCTAGGACAATATATCTATGAAACCTATGGGGATACCTGGGCAGGAGTTGAAGCTATAATAAGAACCCTTCAACAACTACTGTTTATACATTTCAGAATTGGGTGCCGACATAGCAGAATAGGCATTATTCGACAGAGAAGAACAGGAAATGGAGCCAGTAGATCCTAACCTAGAGCCCTGGAACCATCCAGGAAGTCAGCCTAGTACTCCTTGTACTAAGTGTTATTGTAAAAAATGCTGCTATCATTGCCAAGTGTGCTTCATAACGAAAGGCTTAGGCATCTCCTATGGCAGGAAGAAGCGGAGACAGCGACGAAGAACTCCTCAAGGCAGTAAGGCTCATCAAGATCCTATACCAAAGCAGTAAGTAGTACATGTAATGCTTTCTTTAGTGATATTAGCAATAGTAGCATTAGTAGTAGCGCTAATAATAGCCATAGTTGTGTGGACTATAGTATTCATAGAGTGCATAAGATTAAAAAGGCAAAGAAAAATAGACTGGTTAATTGATAGAATAAGAGAAAGAGCAGAAGATAGTGGCAATGAGAGTGAGGGAGATAAAGAGGAATTATCAGCACTTGTGGAGATGGGGCACCATGCTCCTTGGCATATTGATGATATGTAGAGTTACAGGAAATTTGTGGGTCACAGTTTATTATGGGGTACCTGTGTGGAAAGAAGCAACCACTACTCTATTTTGTGCATCAGATGCTAGAGCATATAAAGCAGAGGCACATAATATCTGGGCTACACATGCCTGTGTACCAACAGATCCCAACCCACGAGAAATAAACTTAGAAAATGTCACAGAAAACTTTAACATGTGGAAAAATAACATGGTGGAGCAGATGCATGAGGATATAATCAGTTTATGGGATCAAAGCCTAAAACCATGTGTAAAATTAACCCCACTCTGTGTCACTTTACACTGCACTGACTGGCAGAATAGTACCAGTAATGGTACTGAGGAAATAGGAATGAAAAACTGCTCTTTCAATGTAACCACAGAAGTAAGAGATAAGAAGAAGCAAGTACATGCACTTTTTTATAAACTTGATGTGGTACAAATGAATGATAGTAATACTGATAATACCAGCTATACATTAATAAACTGTAATACCTCAGCCATTACACAGGCGTGCCCAAAGGTATCCTTTGAACCAATTCCCATACATTATTGTGCCCCAGCTGGATTTGCGATTCTAAAATGTAACAATAAGAGGTTCAATGGGACGGGTCCATGCAAAAACGTCAGCACAGTACAGTGTACACATGGGATTAGGCCAGTAGTGTCAACTCAGCTGCTGTTGAATGGCAGTCTAGCAGAAGAAGAGATAATAATTAGATCTGAAAATCTCACAGATAATGCTAAGGTTATAATAGTACAGCTTAATGAGTCTGTAACAATTAATTGCACAAGGCCCAACAACAATACTGTACAAAGTATACACATGGGACCAGGGCGAGCACTCTTTACAACAAAAATAATAGGAAAGATAAGACAAGCACATTGTAATATTAGTGGAACAGGATGGAATAAAACGTTACAACAGGTAGCTACAAAATTAAGAGACCTTTATAACAGGACAGAAATAAATTTTAAACCATCCTCGGGAGGGGACCCAGAAATTACAACACACAGCTTTAATTGTGGAGGGGAATTTTTCTACTGCAATACATCAGGACTGTTTAATAGCAGATGGGGGAATGATACTATATCAAATAATAACGGGGAAAATGAGACTACAATCACACTCCCATGCAGAATAAAACAAATTATAAACATGTGGCAGGGAGTAGGAAAAGCAATGTATGCCCCTCCCATTGCAGGAGTAATTAGATGTTCATCAAATATTACAGGACTATTGTTGACAAGGGATGGTGGTGTAAATACTAGTCAGAATGAGACCTTCAGACCTGGAGGAGGAGATATGAGAGACAATTGGAGAAGTGAATTATACAAATATAAAGTAGTAAGAATTGAACCACTAGGTCTAGCACCCACCAAGGCAAAGAGAAGAGTGGTGGAAAGAGAAAAAAGAGCAATAGGACTGGGAGCTTTGTTCCTTGGGTTCTTGGGAACAGCAGGAAGCACGATGGGCGCAGCGTCACTGACGCTGACGGTACAGGCCAGAAATTTATTGTCTGGTATAGTGCAACAGCAAAACAATTTGCTGAGGGCTATAGAGACGCAACAGCATCTATTGCAACTCACAGTCTGGGGCATTAAACAGCTCCAGGCAAGAGTCCTGGCTGTGGAAAGATACCTAAAGGATCAACAGCTCCTAGGAATTTGGGGTTGCTCTGGAAAACACATTTGCACCACTAATGTGCCCTGGAACTCTAGCTGGAGTAATAAATCTATAGATGAGATTTGGAATAACATGACATGGATGGAGTGGGAAAGAGAAATTGACAATTACACAGGGTTAATATACAGCTTAATTGAAGAATCGCAAATCCAACAAGAAAAGAATGAAAAAGAACTATTAGAGTTGGACAAATGGGCAAGTTTATGGAATTGGTTTAACATAACACAATGGCTGTGGTATATAAAAATATTCATAATGATAGTAGGAGGCTTGATAGGTTTAAGAATAATTTTTGCTGTGCTTTCTTTAGTAAATAGAGTTAGGCAGGGATATTCACCTCTGTCGTTTCAGACCCTCCTCCCAGCACCGAGGGGACCCGACAGGCCCGAAGGAATAGAAGAAGAAGGTGGAGAGCAAGGCAGAGGCAGATCCATTCGATTGGTGAGCGGATTATCAGCACTTATCTGGGACGATCTGAGGAACCTGTGCCTCTTCAGCTACCACCACTTGAGAGACTTAATATTAATTGCAACGAGGATTGTGGAGCTTCTGGGACGCAGGGGGTGGGAAGCCATCAAGTACTTGTGGAATCTCCTGCAGTATTGGATTCAGGAACTAAAGAATAGTGCTATTAGCTTGTTCAATACCACAGCAATAGCAGTAGCTGAGGGGACAGATAGGATTATAGGAATATTACAAAGAACTATTAGAGCTGTTCTGAATATACCCACAAGAATAAGACAGGGCTTGGAAAGGGCTTTACTATAAAATGGGTGGCAAATGGTCAAAAAATAGTATAGTTGGATGGCCTGCTATAAGGGAAAGAATAAGAAGAACTGATCCAGTAGCAGAAGGGGTGGGAGCAGCATCTCGGGACCTAGGAAAGCATGGGGCAATCACAAGTAGCAATACAGCACAAACCAATCCTGACTGTGCCTGGCTAGAAGCACAAGAACAGGACGAGGAAGTGGGTTTTCCAGTCAGACCTCAGGTGCCGTTAAGACCAATGACTTACAAGGGAGCTCTCGATCTGAGCCACTTTTTAAAAGAAAAGGGGGGACTGGAAGGGTTAGTTTGGTCCCAGAAAAGACAAGAGATC
>D.UG.94.94UG114_U88824_J.SE.94.SE7022_AF082395
CTGAAAGCGAAAGTAGAACCAGAGGAGATCTCTCGACGCAGGACTCGGCTTGCTGAAGCGCGCACGGCAAGAGGCGAGGGGCAGCGGAAGGTGAGTACGCTAAAAAATTTTTGACTAGCGGAGGCTAGAAGGAGAGAGATGGGTGCGAGAGCGTCAGTATTAAGCGGAGGAAAATTAGATGAATGGGAAAAAATTCGGTTACGGCCAGGGGGAAAGAAAAAATATAGACTAAAACATCTAGTATGGGCAAGCAGGGAGCTAGAACGATTCGCACTTAATCCTGGCCTTTTAGAAACATCAGAAGGCTGTAGACAAATAATAAGACAGCTACAACCATCTATTCAGACAGGATCAGAGGAAATTAAATCATTATATAATACAGTGGTAACCCTCTATTGTGTACATGAGAGGATAAAGGTAGCAAGCACCAAGGAAGCTTTAGACAAGATAGAGGAAGAACAAGCCAAAAGTAAGAAAAAAGCACAGCAAGCAACAGCTGACACAAGAAACAGCAGCCAGGTCAGCCAAAATTATCCTATAGTGCAAAACCTACAGGGGCAAATGGTACACCATCCCCTATCACCTAGAACTTTGAACGCATGGGTAAAAGTAATAGAGGAGAAGGCTTTCAACCCAGAAGTAATACCCATGTTTTCAGCATTATCAGAAGGAGCCACCCCACAAGATTTAAATACCATGCTAAACACAGTGGGGGGACATCAAGCAGCCATGCAAATGTTAAAGGATACCATCAATGAGGAAGCTGCAGAATGGGATAGGCTACATCCAGTGCATGCAGGGCCTGTTGCACCAGGCCAATTGAGAGAACCAAGGGGAAGTGATATAGCAGGAACTACTAGTAACCTTCAGGAACAAATAGGATGGATGACAAGCAATCCACCTATCCCAGTAGGAGAAATCTATAAAAGATGGATAATCCTAGGATTAAATAAAATAGTAAGAATGTATAGCCCTGTCAGCATTTTGGACATAAGACAAGGACCAAAGGAACCCTTTAGAGACTATGTAGATCGGTTCTATAAAACTCTAAGAGCCGAGCAAGCTTCACAGGATGTAAAAAATTGGATGACTGAAACCTTGTTGGTCCAAAATGCGAACCCAGATTGTAAAACTATCTTAAAAGCATTGGGACCAGCGGCTACATTAGAAGAAATGATGACAGCATGTCAGGGAGTGGGGGGACCCAGTCATAAAGCAAGAGTTTTGGCTGAGGCAATGAGCCAAGCAACAAATGCAAATACTGCTATAATGATGCAGAGAGGCAATTTTAAGGGCCCAAAGAAAATCATTAAGTGTTTCAACTGTGGCAAAGAAGGGCACACGGCAAAAAATTGCAGGGCTCCTAGAAAAAAGGGCTGTTGGAAATGTGGAAGGGAAGGACACCAAATGAAAGATTGCACTGAAAGACAGGCTAATTTTTTAGGGAAAATTTGGCCTTCCCACAATGGAAGGCCAGGGAATTTCCTTCAGAGCAGACCCCCAGCAGAGCCAACAGCCCCACCAGCAGAGATCTTCGGATTAGGGGAGGAGATAACACCTCCTCAGAAACAGGAGCAGAAAGACAAGGAACTGTATCCTTTAACCTCCCTCAAATCACTCTTTGGCAACGACCCGTTGTCACAGTAAAGATAGGGGGACAGCTAAAGGAAGCTCTATTAGATACAGGAGCAGATGATACAGTATTAGAAGAAATAAATTTGCCAGGAAAATGGAAACCAAAAATGATAGGGGGAATTGGGGGCTTTATCAAAGTAAGACAGTATGATCAAATACCCTTAGAAATCTGTGGACATAAAGCTATAGGTACAGTATTAGTAGGACCTACACCTGTCAACATAATTGGAAGAAATTTGTTGACTCAGATTGGTTGCACTTTAAATTTTCCAATTAGTCCTATTGAAACTGTACCAGTAAAATTAAAGCCAGGGATGGATGGCCCAAAAGTTAAACAATGGCCGTTGACAGAAGAAAAAATAAAAGCACTAATAGAAATTTGTTCAGAACTAGAAAAGGAAGGAAAAATTTCAAAAATTGGGCCTGAAAACCCATACAATACTCCAATATTTGCCATAAAGAAAAAAGACAGTACTAAGTGGAGAAAATTAGTAGATTTCAGAGAACTTAATAAGAGAACTCAAGACTTTTGGGAAGTTCAACTAGGAATACCACATCCTGCAGGGCTAAAAAAGAAAAAATCAGTAACAGTACTGGATGTGGGTGACGCATATTTTTCAGTTCCCTTACATGAAGACTTTAGAAAATATACCGCATTCACCATACCTAGTACAAACAATGAGACACCAGGAATTAGATATCAGTACAATGTGCTTCCACAAGGATGGAAAGGATCACCAGCAATATTCCAAAGTAGCATGACAAAAATCTTAGAACCTTTTAGAAAACAAAATCCAGAAATGATTATCTATCAATACATGGATGATTTGTATGTAGGATCTGACTTAGAAATAGGGCAGCATAGAATAAAAATAGAGGAATTAAGGGGACACCTCTTGAAGTGGGGATTTACCACACCAGACAAAAAGTATCAGAAAGAACCCCCATTTCTTTGGATGGGTTATGAACTCCATCCTGATAAGTGGACAGTACAGCCTATACATCTGCCAGAAAAGGAAAGCTGGACTGTCAATGATATACAGAAGTTAGTGGGAAAATTAAATTGGGCAAGCCAGATTTATCCAGGAATTAAAGTAAGACAATTATGCAAATGCCTTAGGGGAGCCAAAGCACTGACAGAAGTAATACCACTGACAGCAGAAGCAGAATTAGAACTGGCAGAAAACAGGGAAATACTAAAAGAACCAGTACATGGAGCGTATTATGACCCATCAAAAGACTTAATAGCAGAAATACAGAAACAAGGGCAAGATCAATGGACATATCAAATATATCAAGAACAATATAAAAATCTGAAAACAGGAAAGTATGCGAAAATGAGGGGTACCCACACTAATGATGTAAAACAATTAACAGAGGCAGTGCAGAAAATAGCCCAAGAATGTATAGTAATATGGGGAAAGACTCCTAAATTTAGACTACCCATACAAAAGGAAACATGGGAAACATGGTGGACAGAGTATTGGCAGGCCACCTGGATTCCTGAGTGGGAGTATGTCAACACCCCTCCTTTAGTTAAATTATGGTATCAGTTAGAGAAGGAACCCATAGTAGGAGCAGAAACTTTCTATGTAGATGGGGCAGCTAATAGAGAGACTAAAATAGGAAAAGCAGGATATGTTACTGACAGAGGAAGACAGAAAGTTGTCTCTCTAACTGACACAACAAATCAGAAGACTGAATTACAAGCCATTAATCTAGCTTTGCAGGATTCGGGATTAGAAGTAAACATAGTAACAGACTCACAATATGCATTAGGAATCATTCAAGCACAACCAGATAAGAGTGAATCAGAGGTAGTCAGTCAAATAATAGAGCAGTTAATAAAAAAGGAAAAGGTCTACCTGTCATGGGTACCAGCACACAAGGGGATTGGAGGAAATGAACAAGTAGATAAATTAGTCAGTAATGGAATCAGAAAAATACTATTTTTGGATGGAATAGATAAGGCTCAAGAAGAACATGAGAAATACCACAACAATTGGAGGGCAATGGCTAGTGAGTTTAACCTGCCACCTGTAGTAGCAAAAGAAATAGTAGCCAGCTGTGATAAATGTCAGGTGAAAGGAGAAGCCTTGCATGGACAAGTAGACTGTAGTCCAGGAATATGGCAATTAGATTGTACACATTTAGAAGGAAAAGGTATCCTGGTAGCAGTCCATGTAGCCAGTGGTTATATAGAAGCAGAAGTTATTCCAGCAGAAACAGGGCAGGAAACAGCCTACTTTCTTTTGAAATTAGCAGGAAGATGGCCAGTAAAAGTAGTACATACAGATAATGGCAGCAATTTCACCAGCGCTGCAGTAAAGGCCGCCTGTTGGTGGGCAGGTATCAAGCAGGAATTTGGAATTCCCTACAATCCCCAAAGTCAAGGAGTAGTAGAATCTATGAATAAAGAATTAAAGAAAATTATCGGGCAGGTAAGAGAACAAGCTGAACATCTTAAGACAGCAGTACAAATGGCAGTATTCATCCACAATTTTAAAAGAAAAGGGGGGATTGGGGGGTACAGTGCAGGGGAAAGAATAATAGATATCATAGCAACAGACATACAAACTAAGGAATTACAAAAACAAATCATAAAAATTCAAAATTTTCGGGTTTATTACAGGGACAGCAGAGATCCAGTTTGGAAAGGACCAGCAAAGCTTCTCTGGAAAGGTGAAGGGGCAGTAGTAATACAAGACAATAGTGAAATAAAGGTAGTACCAAGAAGAAAAGCAAAGATTATTAGGGATTATGGAAAACAGATGGCAGGTGATGATTGTGTGGCAAGTAGACAGGATGAGGATTAGAACATGGAAAAGTTTAGTAAAACACCATATGTATATTTCAAAGAAAGCTAAAGGATGGTTGTATAGACATCACTATGACTGCCCAAATCCAAAAATAAGTTCAGAAGTACACATCCCATTAGGAGAAGCTAGGCTGGTAGTAAAAACATATTGGGGTCTGCATACAGGAGAAAGAGAATGGCATTTGGGTCAGGGAGTCTCCATAGAATGGAGAAAAGGGAGATATAACACACAAATAGACCCTGGCCTAGCAGACCAACTAATTCATATATATCATTTTGATTGTTTTGCAGAATCTGCTATAAGAAAAGCCATATTAGGACAAGTAGTTTATCCTAGGTGTAATTATCAAGCAGGACATAACAAGGTAGGATCTTTACAATACTTGGCACTAACAGCATTAGTAACACCAAGGAAGATAAAACCACCTTTGCCTAGCGTTGGGAAGCTGACAGAAGACAGATGGAACAAGCCCCAGAGAACCAAGGGCCACAGAGGGAGCCATACAATGAATGGACATTAGAGCTTTTAGAGGAGCTTAAGAGTGAAGCTGTTAGACACTTTCCTGGGCCATGGCTTCATAGCCTAGGACAATATATCTATGAAACTTATGGGGATACCTGGACAGGAGTTGAAGCTATAATCAGAATCCTTCAACAACTACTGTTTATCCATTTCAGAATTGGGTGTCGACATAGCAGAATAGGCATTAATCGACAGAGAAGAATAAGAAATGGAGCCAGTAGATCCCAATCTAGAGCCCTGGAACCATCCAGGAAGTCAGCCTAGGACTCCTTGTAACAAATGCTATTGTAAAAGGTGTTGCTATCATTGTTACGTGTGCTTCGTAACGAAAGGCTTAGGCATCTCCTATGGCAGGAAGAAGCGGAGACCGCGACGAAGAACTCCTCCAGGCGGTCAGGCTAATCAAGATCCTGTACCAAAGCAGTAAGTAGTACATGTAATGCAACCTTTAGAGATATTAGCAATAGTAGCATTAGTAGTAGCACTAATACTAGCAATAGTTGTGTGGACTATAGTATTCATAGAGTGTAAAAAATTAAGAAGGCAAAGAAAAATAGACTGGTTAATTGATAGAATAAGAGAAAGAGCAGAAGATAGTGGCAATGAGAGTGAGGGAGACAAAGAGGAATTATCAGCACTTGTGGAAATGGGGCACGATGCTCCTTGGGATGCTGATGATATGTAGTGTTACAGGAAAGTCGTGGGTCACAGTTTATTATGGGGTGCCTGTGTGGAAAGAAGCAACCACTACTCTATTTTGTGCATCAGATGCTAAGGCATATAAAGCAGAGGCACATAACATCTGGGCTACACATGCCTGTGTACCAACAGACCCCAACCCACAAGAAATAAAACTAGAAAATGTCACAGAAAACTTTAATATGTGGAAAAATAACATGGTGGAGCAGATGCATGAGGATATAATCAGTTTATGGGATCAAAGTCTAAAACCATGTGTAAAGTTAACCCCACTCTGTGTCACTTTAAACTGCACTAACTGGGTCACTGATACCACCAATACCACAGGAATGGCAAACTGCTCTTTCAATATAACCACAGAAATAAGAGATAAGAAGAAGCAAGTACAGGCACTTTTTTATAAACTTGATGTGGTAAAAATAAATGATAATGATAGTGATAACACCAGCTATAGACTAATAAATTGTAATACCTCAGCCATTACACAGGCGTGTCCAAAGATGACCTTTGAGCCAATTCCCATACATTATTGTGCCCCAGCTGGATTTGCAATTCTAAAATGTAACGAAAAGAAGTTCAATGGAACAGGTCCATGCAAAAATGTCAGCACAGTACAGTGTACACATGGGATTAAGCCAGTAGTGTCAACTCAACTGTTGTTGAATGGCAGTCTAGCAGAAGAAGAAATAATAATTAGATCTGAAAATCTCACAAACAATGCTAAAATCATAATAGTACAGCTTAATGAGTCTGTACCAATTAATTGCATAAGGCCCTATAACAATACAAGACAAAGTACACGTATAGGACCAGGGCAAGCACTCTTTACAACAAAAGTAATAGGAGATATAAGACAAGCACATTGTAACATTAGTGGAGCAGGATGGAATAAAACTTTACAACAGGTAGCTGAAAAATTAGGAAACCTTCTTAACCAGACAACAATAATTTTTAAACCATCCTCGGGAGGGGACCCAGAAATTACAACACACAGCTTTAATTGTGGAGGGGAATTTTTCTACTGCAATACAACAAGACTGTTTAATAGTACATGGAAAAGGAATAATAGTGAATGGAGGAGTGATAATACACCAGATGAGACAATCACACTCCAATGCAGAATAAAACAAATTATAAACATGTGGCAGGAAGTAGGAAAAGCAATGTATGCCCCTCCCATTGAAGGATTCATCAACTGTTCATCAAATATTACAGGACTATTGTTGACAAGAGATGGTGGTGCAATTAATAGTAGCCAGAATGAGACCTTCAGACCTGGAGGAGGAGATATGAGAAACAATTGGAGAAGTGAATTATACAAATATAAAGTAGTAAAACTTGAACCAATAGGTCTAGCGCCCACCGCGGCAAAGAGAAGAGTGGTAGAAAGAGAAAAAAGAGCAATAGGACTGGGAGCTCTGTTCCTTGGGTTCTTGGGAACAGCAGGAAGCACGATGGGCGCAGTGTCACTGACGCTGACGGTACAGGCCAGACAGGTATTGTCTGGTATAGTGCAACAGCAAAACAATTTGCTGAGGGCTATAGAGGCGCAACAGCATCTGTTGCAACTCACAGTCTGGGGCATTAAACAGCTCCAGGCAAGAATCCTGGCTGTGGAAAGCTACCTAAAGGATCAACAGCTCCTAGGAATTTGGGGTTGCTCTGGAAAACACATTTGCACCACTAATGTGCCCTGGAACTCTAGCTGGAGTAATAGATCTGTAGATGAAATTTGGAATAACATGACCTGGATGGAGTGGGAAAGAGAAATTGACAATTATACAGAGTTAGTATACAGCTTACTTGAAGTATCGCAAATCCAGCAAGAGAAAAATGAACAAGAACTATTGAAATTGGACACATGGGCAAGTTTGTGGAATTGGTTTAGCATAACACAATGGCTGTGGTATATAAAAATATTCATAATGATAGTAGGAGGCTTGATAGGTTTAAGAATAGTTTTTGCTGTGCTTTCTGTAGTAAATAGAGTTAGGCAGGGATACTCACCTCTGTCATTTCAGACCCTCCTCCCAGCCCCGAGGGAACCCGACAGGCCCGAAGGAATAGAAGAAGAAGGTGGAGAGCGAGACAGAGGCAGATCCATTCGATTGGTGAACGGATTATCAGCACTTATCTGGGACGATTTGAGGAACCTGTGCCTCTTCAGTTACCACCGCTTGAGAGACTTAATCTTAATTGCAGCGAGGATTGTGGAACTTCTGGGACGCAGGGGGTGGGAAGCCATCAAATATCTGTGGAATCTCCTGCAGTATTGGATTCAGGAACTAAAGAATAGTGCTATTAGTTTGCTTAATACCACAGCAATAGCAGTAGCTGAAGGAACAGATAGAATCATAGAAATAGCACAAAGAGCTTTTAGAGCTATTCTTCACATACCTAGAAGAATAAGACAGGGTTTAGAAAGAGCTTTGCTATAAAATGGGTGGCAAGTGGTCAAAAAGTAGTATAGTTGGGTGGCCTGCTGTAAGAGAAAGAATGAGAAGAACTGAGCCAGCAGCAGAAGGGGTGGGAGCAGCATCCCGGGACCTGGAAAAACATGGGGCAATCACAAGCAGCAATACAGCACAGACTAATGATGCCTGTGCCTGGCTAGAAGCACAGGAAGAGGAGGAAGTGGGATTTCCAGTCAGACCTCAGGTACCATTAAGACCAATGACTTACAAGGAAGCGGTAGACCTAAGCCACTTTTTAAAAGAAAAGGGGGGACTGGAAGGGTTAGTTTGGTCCCCGAAAAGACAAGAGATCCTTGATCTTTGGGTCTACCACACACAAGGCTTCTTCCCTGATTGGCAAAATTACACACCAGGGCCAGGGATTAGATATCCACTGACCTTTGGATGGTGCTTCGAGTTAGTACCAATGGAGCCAAAGGAGGTAGAAGAGAACACTGAAGGAGAGGACAACTGCTTGTTACACCCGATAAACCAGCATGGAATGGAGGACCCGGAGAGAGAAGTTTTAGTGTGGAGATTTAACAGCAGACTAGCATTTGAACACAAGGCCAAAATGAAACATCCGGAGTACTACAAAGACTGCTGACACCGAGCTTTCTACAAGGGACTTTCCGCTGGGGACTTTCCAGGGAGGCGTAACAGGGGCGGGACTGGGAGTGGCTAACCCTCAGATGCTGCATATAAGCAGCTGCTTTCTGCCTGTACTGGGTCTCTCTTGTTAGACCAGATACGAGCCTGGGAGCTCTCTGGCTAGCAAGGGAACCCACTGCTTAAGCCTCAATAAAGCTTGCCTTGAGTGCTTC
>D.UG.99.99UGF03726_AF484519_K.CD.97.EQTB11C_AJ249235
GCGAGAGCGTCAGTATTAAGTGGAGGAAAATTAGATGAATGGGAAAAAATTCGGTTACGGCCAGGGGGAAAGAAAAAATATCAACTAAAACATATAGTATGGGCAAGCAGGGAGCTGGAACGATATGCACTTAACCCTGGCCTTTTAGAGTCATCAGAAGGCTGTAAACAAATACTGGGACAGCTACAACCAGCTCTTCAGACAGGATCAGAGGACTTTAGATCATTATATAATACAGTAGCAACCCTCTATTGTGTACATGCAAGGATAAAGGTATCAGACACCAAGGAAGCTTTAGACAAGATAGAGGAAGAACAAAACAAAAGTAAGAAAAAGGCACAGCAAGCAACAGCTGACACAAGAAGCAGCAGCCAGGTCAGCCAAAATTATCCTATAGTGCAAAATCTACAGGGCCAAATGGTACACCAGGCCATATCACCTAGAACTTTGAACGCATGGGTAAAAGTGATAGAGGAGAAGGCTTTCAGCCCAGAAGTGATACCCATGTTTTCAGCATTATCAGAAGGAGCCACCCCACAAGATTTAAACACTATGCTAAACACAGTGGGGGGACATCAGGCAGCCATGCAAATGTTAAAAGAGACCATCAATGAGGAAGCTGCAGAATGGGATAGGCTACATCCAGTACATGCAGGGCCTGTTGCACCAGGACAAATGAGAGATCCAAGGGGAAGTGATATAGCAGGAACTACTAGTACCCTTCAGGAACAAATAGGATGGATGACAAGTAATCCACCTATCCCAGTAGGAGAAATCTATAAAAGATGGATAATCCTAGGGTTAAATAAAATAGTAAGAATGTATAGCCCTGTAAGCATTTTGGACATAAGACAAGGACCAAAGGAACCTTTTAGAGACTATGTAGATCGGTTCTATAAAACTCTAAGGGCCGAGCAAGCTACACAGGAGGTAAAAAATTGGATGACTGAAACCTTGTTGATCCAAAATGCAAACCCAGATTGCAAAACTATCTTAAAAGCATTGGGGCCAGCGGCTACATTAGAAGAAATGATGACAGCATGTCAGGGAGTGGGGGGACCCAGTCATAAAGCAAGAGTTTTGGCTGAGGCAATGAGCCAAGCCACTAATGCCAATGCTGCTATAATGATGCAAAGAGGCAATTTTAAGGGTCAAAGGAAAAACATTAAGTGTTTCAACTGTGGCAAAGAAGGGCACACAGCAAAAAATTGCAGGGCCCCTAGAAAAAGGGGCTGTTGGAAATGTGGAAAGGAAGGACACCAAATGAAAGATTGTACTGAAAGACAGGCTAATTTTTTAGGGAGAGCTTGGCCTTCCCTCAAGGGAAGGCCGGGGAACTTCCTCCAGAGCAGACCAGAGCCAACAGCCCCGCCAGCAGAGAGCTTCGGGTTTGGGGAGGAGATAACACCCCCTCAGAAAAAGGAGCAGAAAGACAAGGAGGAGCTGTATCCCTTAGCTTCCCTCAAATCACTCTTTGGCAACGACCCCTCGTCACAGTAAAAATAGGGGGACAGCTTAAGGAAGCTCTATTAGATACAGGAGCAGATGATACAGTATTAGAAGAAATAAATCTGCCAGGAAAATGGAAACCAAAAATGATAGGGGGAATTGGAGGTTTTATCAAAGTAAGACAGTATGATCAAATACCCATAGAAATCTGTGGACATAAAGCTGTAGGTACAGTATTAGTAGGACCTACACCTGTCAACATAATTGGAAGAAATTTGTTGACTCAGATTGGTTGCACTTTAAATTTTCCAATTAGTCCTATTGAAACTGTACCGGTAAAATTAAAGCCAGGGATGGATGGCCCAAAAGTTAAACAATGGCCGTTGACAGAAGAAAAAATAAAAGCACTAACAGAAATTTGTACAGACATGGAAAAGGAAGGAAAAATTTCAAGAATTGGGCCTGAAAATCCATATAATACTCCAATATTTGCCATAAAGAAAAAAGACAGTACTAAGTGGAGAAAATTAGTAGATTTCAGAGAACTCAATAAGAGAACTCAAGACTTCTGGGAAGTCCAACTAGGAATACCACATCCTGCAGGGCTAAAAAAGAAAAAATCAGTAACAGTACTGGATGTGGGTGATGCATACTTTTCAGTTCCCTTAGATGAAGACTTTAGAAAGTATACTGCATTCACTATACCTAGTACAAACAATGAGGCACCAGGAATTAGATATCAGTACAATGTGCTTCCACAAGGATGGAAAGGATCACCAGCAATATTCCAAAGTAGTATGACGAAAATCTTAGAACCTTTTAGAAAACAAAATCCAGAAATGGTTATCTATCAATACATGGATGATTTGTATGTAGGATCTGACTTAGAAATAGGGCAGCATAAAATAAAAATAGAGGAATTAAGGGAACACTTACTGAAGTGGGGATTTACCACACCAGACAAAAAGCATCAGAAAGAGCCTCCATTTCTTTGGATGGGTTATGAACTCCATCCTGATAAATGGACAGTACAACCTGTAAAACTGCCAGAAAAAGAAAGCTGGACTGTCAATGATATACAAAAATTAGTAGGAAAATTAAATTGGGCAAGTCAGATTTATGCAGGAATTAAAGTAAAACAATTATGCAGATGCATTAAGGGAGCCAAAGCACTGACAGAAGTAGTACCACTAACAAAAGAAGCAGAATTAGAACTAGCAGAAAACAGGGAAATTCTAAAAGAACCAGTACATGGAGTGTATTATGACCCATCAAAAGACTTAATAGCAGAAATACAGAAACAAGGGCAAGACCAATGGACATATCAAATCTATCAAGAACAATATAAAAATCTGAAAACAGGAAAGTATGCAAAAATGAGGGGTACCCACACTAATGATGTAAAGCAATTAACAGAGGCAGTGCAAAAAGTAGCCCAAGAATGTATAGTGATATGGGGAAAGACTCCTAAATTTAGGCTACCCATACAAAAGGAAACATGGGAAACATGGTGGACAGAGTATTGGCAGGCCACCTGGATTCCTGAGTGGGAGTTTGTTAATACCCCTCCTTTGGTTAAATTATGGTACCAGTTAGAAAAGGAACCCATAGCAGGAGCAGAAACTTTCTATGTAGATGGGGCAGCTAATAGAGAAACTAAATTAGGAAAAGCAGGATATGTTACTGACAGAGGAAGACAGAAAGTTGTCCCTCTAACTGACACAACAAATCAAAAGACTGAATTACAAGCCATTAACCTAGCTTTGCAGGATTCAGGATTAAAAGTAAACATAGTAACAGACTCGCAATATGCATTAGGAATCATTCAAGCACAACCAGATAAGAGTGAGTCAGAGTTAGTCAGTCAAATAATAGAGCAGTTAATAAAAAAGGAAAAGGTCTATCTATCATGGGTACCAGCACACAAAGGGATTGGAGGAAATGAACAAGTAGATAAATTAGTCAGTAATGGAATCAGGAAAATATTATTCTTGGATGGAATAGATAAGGCTCAAGAAGAACATGAAAAATACCACAACAATTGGAGAGCAATGGCTAGTGATTTTAACCTGCCACCTGTGGTAGCAAAAGAAATAGTAGCTAGCTGTGATAAATGCCAGGTAAAAGGAGAAGCCTTGCATGGACAAGTAGACTGTAGTCCAGGAATATGGCAATTAGATTGTACACATTTAGAAGGAAAAGTTATCCTGGTAGCAGTCCATGTAGCCAGTGGCTACATGGAAGCAGAAATTATTCCAGCAGAAACAGGGCAGGAAACAGCCTACTTTCTCTTGAAATTAGCAGGAAGATGGCCAGTAAAAGTAGTACATACAGACAATGGCAGCAATTTCACCAGCGCTGCAGTTAAGGCTGCCTGTTGGTGGGCAGGCATCAAACAGGAATTTGGGATTCCCTACAATCCCCAAAGTCAAGGAGTAGTAGAATCTATGAATAAAGAATTAAAGAAAATTATAGGACAGGTAAGAGACCAAGCTGAACATCTTAAGACAGCAGTACAGATGGCAGTATTCATTCACAATTTTAAAAGAAAAGGGGGGATTGGGGGGTACAGTGCAGGGGAAAGAATAATAGACATAATAGCAACAGACATACAAACTAAAGAATTACAAAAACAAATCATAAAAATTCAAAATTTTCGGGTTTATTACAGGGACAGCAGAGATCCAATTTGGAAAGGACCAGCAAAGCTTCTCTGGAAAGGTGAAGGGGCAGTAGTAATACAGGACAATAGTGAAATAAAGGTAGTACCAAGAAGAAAAGCAAAGATCATTAGGGATTATGGAAAACAGATGGCAGGTGATGATTGTGTGGCAAGTAGACAGGATGAGGATTAGAACATGGAATAGTTTAGTAAAACATCATATGTATGTTTCAAAGAAAGCTAAAAGATGGTTGTATAGGCATCACTATGAGTGCCCACACCCAAGAGTAAGTTCAGAAGTACACATTCCACTAGGAGAAGCTAGACTGGTAGTAAAAACATATTGGGGTCTGCATACAGGAGAAAGAGACTGGCATCTGGGTCAAGGAGTCTCCATAGAATGGAGGAAAAGGAGATATAGTACACAAGTAGATCCTGGCCTGGCAGACCAATTAATTCATACATATTATTTTGATTGTTTTGCAGAATCTGCTATAAGACAAGCCATATTAGGACATATAGTTAGTCCTAGGTGTGAATATCAAGCAGGACATACCCAGGTAGGATCCTTACAGTATTTGGCTCTAACAGCATTAATAGCTCCAAAAAAGACAAAACCACCGGTGCCTAGTGTCCAGAAACTAGTAGAAGATAGATGGAACAAGCCCCAGAGGACCAAGGGCCACCGAGGGAGCCATACAATGCATGGGCATTAAAGCTTTTAGAGGAACTTAAGAGTGAAGCTGTTAGACACTTTCCTAGGCCCTGGCTTCATAGCCTAGGACAACATATTTATGAAACTTATGGGGACACCTGGGCAGGAGTTGAAGCTCTAATAAGAATCCTTCAACAACTACTGTTTATCCATTTCAGAATTGGGTGTCAACATAGCAGAATAGGCATTATTCGATCAAGAAGAATAAGAAATGGAGCCAGTAGATCCTAACCTAGAGCCCTGGAACCATCCAGGAAGCCAGCCTAGTACTCCTTGTAATAAGTGTTATTGTAAAAAGTGCTGCTATCATTGCCAACATTGCTTCATAACGAAAGGCTTAGGCATCTCCTATGGCAGGAAGAAGCGGAGACAGAGACGAAGAGCTCATCAGAACGGTCCAGCTCATCAAGATCATATATCAAAGCAGTAAGTAGTACCTGTAATGCAATCTTTAGTGATATTAGCAATAGTAGCATTAGTAGTAGCGCTAATATTAGCAATAATTGTGTGGACTATAGTTTTCATAGAGTGTAGAAAACTAAGAAAGCAAAGAAAAATAGACTGGTTAATTGATAGAATAAGAGAAAGAGCAGAAGATAGTGGCAATGAGAGTGAGGGGGATAGAGAGGAATTACTTGAGATGGGGCATGATGCTCCTTGGGATATTGATGGCATATAGTGCTAAAGAACAGTTGTGGGTTACAGTGTATTATGGGGTACCTGTGTGGAAAGAAGCAACCACTACTCTATTCTGTGCATCAGATGCTAAATCATATGAAACAGAGGCACATAATATCTGGGCTACACATGCCTGTGTACCAACAGACCCCAACCCACAAGAAATGAAACTAGAAAATGTCACAGAAAATTTTAACATGTGGAAAAATGACATGGTGGAGCAGATGCATGAGGATATAATCAGTTTATGGGACCAAAGCCTAAAACCATGTGTAAGATTAACCCCACTCTGTGTCACTTTAAACTGTACAGATTGGAGGGGCACAAATGCCACAGGTACAAATGGCACAAATACAAGTGTCACAGAGGACATAGGAATGAAAAACTGCTCTTTCAATATAACCACAGAAATAAGAGATAAAAAGAAAAAGTATGCACTTTTTTATAAGCTTGATGTGGTACCAATAGGTAAGGATAATAGCAGCTATAGATTAATAAATTGTAATACCTCAGTCATTACACAGGTGTGTCCAAAGATAAGCTTTGAGCCAATTCCCATACATTATTGTGCCCCAGCTGGATATGCAATTCTAAAATGTAACGATAAGAAATTCAATGGAACGGGTCCATGCAAAAACGTCAGCACAGTACAGTGTACACATGGGATTAGGCCAGTAGTGTCAACTCAGCTGTTATTGAATGGCAGTCTAGCAGAAGAAGAGATAATAGTTAGATCTGAAAATCTCACAGATAATGCTAAAACCCTAATAGTACAGCTTAACGAGTCTGTAACAATCAATTGCACAAGGCCCCACAACAATACAAGACAAGGTATAAACATAGGACCAGGGCGAGCATGGTATACCTATTCAAAAGACATAGTAGGAGATATAAGACAAGCACATTGTAATATTAGTAAAGCAGAATGGAATAAAACTTTACAACATGTAGCTAAAACATTAGGAGACCTTTTTAACCAGACAACAGTAATTTTTAAACCATCCTCGGGAGGGGACCCAGAAATTACAACACACAGCTTTAACTGTGGAGGGGAATTTTTCTATTGCAACACATCAGGACTGTTTAATAGTACATGGACATCAAATAGTACATCAAATAGTACAAAGGTAAATAGTACTGAGCCAATCACACTCCAATGCAGAATAAAACAAATTATAAATATGTGGCAGGGAGTAGGAAGAGCAATGTATGCCCCGCCCATTGAAGGACTAATTCATTGTTCATCAAATATTACAGGACTACTGTTGACAAGAGATGGTGGTACAAATAATACTAGTCAGAATGAGACTTTCAGACCTGGAGGAGGAAATATGAGAGACAATTGGAGAAGTGAATTATACAAATATAAAGTAGTAAGAATTGAACCAATAGGTCTAGCACCCACCAAGGCAAAGAGGAGAGTGGTGGAAAGAGAAAAAAGAGCAATAGGACTAGGAGCTATGTTCCTTGGGTTCTTGGGAACAGCAGGAAGCACGATGGGCGCAGCGTCAATAACGCTGACGGTACAGGCCAGACAGTTACTGTCTGGTATAGTGCAGCAGCAAAACAATTTGCTGAGGGCTATAGAGGCGCAACAGCATCTGTTGCAACTCACAGTCTGGGGCATTAAACAGCTCCAGGCAAGAATCCTGGCTGTGGAAAGTTACCTAAAGGATCAACAGCTCCTAGGAATTTGGGGTTGCGCTGGAAAACACATCTGCACCACTAATGTGCGCTGGAACTCTAGCTGGAGTAATAAATCTCTAGGGGACATTTGGGGTAACATGACCTGGATGGAATGGGAAAAAGAAATTGACAATTACACAGGCTTAATATATAGCTTAATTGAAGAATCGCAAATCCAGCAAGAAAAGAATGAACAAGACCTATTGCAATTGGACCAATGGGCAAGTTTGTGGAATTGGTTCAGCATAACAAAATGGCTGTGGTATATAAAAATATTCATAATGATAGTAGGAGGCTTAATAGGTTTAAAGATAGTTTTTGCTGTGCTTTCTTTAGTAAATAGAGTTAGGCAGGGATACTCACCTCTGTCGTTTCAGACCCTCCTCCCAGCACCGAGGGGACCCGACAGGCCCGAAGAAATAGAAGAAGAAGGTGGAGAGCAAGGCAGAGGCAGATCAATTCGATTACTGAACGGATTCTCAGCACTTATCTGGGACGACTTGAGGAGCCTGTGCCTCTTCAGCTACCGCCACTTGAGAGACTTACTCTTAATTGCAGTGAGGATTGTGGAACTTCTGGGACGCAGGGGGTGGGAAGCCCTCAAGTATCTGTGGAACCTCCTCCAGTATTGGATTCAGGAACTAAAGAATAGTGCTATTAGTTTGCTTGATACCATAGCAATAGCAACAGCTGAGGGGACAGATAGGATTATAGGAATAATACAAAGAGCTATTAGAGCTATTCTACACGTACCCACACGAATAAGACAGGGCTTGGAAAGGCTTTTACTATAAAATGGGTGGCAAATGGTCAAAAATAGTTGGATGGCCTGCTGTAAGAGAAAGAATGAGAAGAGCTGCTCCAGCAGCAGAAGGGGTAGGAGCAGTATCCCGGGACCTAGAAAAACATGGGGCAATCACAAGTAGTAATACAGCCCATACTAATGCTGACTGTGCCTGGCTAGAAGCACAAGAAGAGGAGGAAGTAGGTTTTCCAGTCAGACCTCAGGTACCATTAAGACCAATGACTTACAAGGCAGCAGTAGATCTGAGTCACTTTTTAAAAGAAAAGGGGGGACTGGAAGGGTTAATTTGGTCCAAGCAAAGACAAGAAATCCTAGATCTGTGGGTCTACCACACACAAGGCTTCTTCCCTGATTGGCAAAACTACACACCAGGGCCAGGGATTAGATACCCACTGACCTTTGGATGGTGCTTCGAGCTGGTACCAGTGGAGACAAAGGAGGTAGAAGAGGCCACTGCAGGAGAGAACAACTGCTTGTTACACCCTATGAACCAGCATGGAATAGAGGACCCGGAGAGAGAAGTGTTAATGTGGAGATTTAACAGTCGCCTGGCATTTGAACACAAGGCCAAGCAGATGCATCCGGATTTCTACAAAGACTGCTGACACCAAAGTTCTACCAAGACCGCTGACACTGAGTTTTCTACAAGGGACTTTCCGCTGGGGACTTTCCAGGGAGGCGTAACAGGGGGTGGGACTGGGAGTGGCTAACCCTCAGATGCTGCATATAAGCAGCTGCGTTTCGCTTGTACTGGGTCTCTCTTGTCAGACCAGATTTGAGCCTGAGAGCTCTCTGGCCGACTAGGGAACCCACTGCT
>F1.FR.96.MP411_AJ249238_F2.CM.95.MP255_AJ249236
ATGGGTGCGAGAGCGTCAGTATTAAGCGGGGGAAAATTAGATGCATGGGAAAGAATTCGATTAAGACCGGGGGGAAAGAAAAAATATAGAATGAAGCATCTAGTATGGGCAAGCAGGGAGTTAGAACGATTTGCAGTTGATCCTGGACTTCTAGAAACACCAGAAGGCTGTAAGCAAATAATAAGACAGCTACAACCATCCCTTCAGACAGGATCAGAAGAGCTTAGATCATTGTTCAATACAGTAGCAGTTCTCTATTGTGTACATCAAAAGATAGAGATAAAGGACACCAAGGAAGCTTTAGAGAAGTTAGAGGAGGAACAAAACAAAGGTCAGCAAAAGACACAGCAAGCGGCAGCTGACAAAGGAGTCAGTCAAAATTACCCTATAGTACAAAATCTTCAGGGACAGATGGTACATCAGCCTATATCACCTAGAACTTTAAATGCATGGGTAAAAGTGATAGAAGAGAAGGCTTTTAGCCCAGAAGTAATACCCATGTTCTCAGCATTATCAGAAGGGGCCACCCCACAAGATTTAAACACCATGCTAAATACAGTGGGTGGACATCAAGCAGCCATGCAAATGTTAAAAGACACCATCAATGAGGAAGCTGCAGAATGGGACAGATTACATCCAGCGCATGCAGGGCCTATCCTACCAGGCCAGATGAGAGAACCTAGGGGTAGTGACATAGCTGGAACTACTAGTACCCTTCAGGAACAAATACAATGGATGACAAGCAACCCACCTGTCCCAGTGGGAGACATCTATAAAAGATGGATCATCCTAGGATTAAATAAAATAGTAAGAATGTATAGCCCTGTTAGCATTTTGGACATAAGACAAGGGCCAAAGGAACCTTTTAGAGACTATGTGGACAGGTTCTTTAAAACTCTAAGAGCTGAGCAAGCTTCACAGGAAGTAAAGAATTGGATGACAGAAAGCTTGCTGGTGCAAAATTCGAACCCAGACTGTAAGACCATCTTAAAAGCATTAGGACCAGGGGCTACACTAGAAGAAATGATGACAGCATGTCAGGGAGTGGGAGGACCTGGCCATAAGGCAAGGGTTTTGGCTGAGGCCATGAGCCAAGCAACAAATGCAGCTATAATGATGCAGAAAAGTAACTATAAGGGCCCAAGAAGATTTATTAAATGTTTTAATTGTGGCAAAGAAGGACACATAGCCAAAAATTGCAGGGCCCCTAGAAAAAAGGGCTGTTGGAAATGTGGAAAAGAAGGACATCAAATGAAAGACTGCACTGAAAGACAGGCTAATTTTTTAGGGAAAATTTGGCCTTCCAACAAGGGGAGGCCCGGAAATTTTCTTCAGAACAGGCCAGAGCCAACAGCCCCGCCAGCGGAGAGCTTCGGGTTCAAAGAGGAAATAACCCCCTCTCCGAAGCAGGAGCAGAAGGACGAGGGACAGGGACTGTATCCTCCCTTAGCCTCCCTCAAATCACTTTTTGGCAGCGACCCTTAGTCACCATAAGAGTGGGGGGACAGCTAAGGGAAGCTCTATTAGATACAGGAGCAGATGATACAGTATTAGAAGACATAGATTTGCCAGGAAAATGGAAACCAAAAATAATAGGGGGAATTGGAGGTTTTATCAAAGTAAAACAGTATGATCAAATAACCATAGATATTTGTGGACACAAGGCTATAGGTACAGTGTTAGTAGGACCTACACCTGTCAACATAATTGGAAGGAATATGTTGACTCAGATTGGTTGCACTTTAAATTTTCCAATTAGTCCTATTGAAACTGTACCAGTAAAATTGAAGCCAGGAATGGATGGCCCAAAGGTTAAACAATGGCCATTGACAGAGGAAAAAATAAAAGCACTAACAGAAATATGTACAGATATGGAAAAAGAAGGAAAGATTTCAAAAATTGGGCCTGAAAATCCATACAATACTCCAATATTTGCCATAAAGAAAAAAGACAGTACTAAATGGAGAAAATTAGTAGATTTTAGAGAACTTAATAAAAGAACTCAAGATTTTTGGGAAGTTCAATTAGGAATACCACATCCTGCAGGGTTAAAAAAGAAAAAGTCAGTAACAGTACTAGATGTGGGGGATGCATATTTTTCAGTTCCCTTAGATAAGGAGTTCAGGAAGTACACTGCATTCACCATACCTAGTCTCAACAATGAGACACCAGGAATCAGATACCAGTACAATGTGCTTCCACAAGGGTGGAAAGGATCACCAGCAATATTCCAAAGTAGTATGACAAAAATTTTAGAGCCCTTTAGAGCAAAAAATCCAGAAATAGTTATCTACCAATACATGGATGATTTGTATGTAGGGTCTGACTTAGAAATAGGGCAGCATAGGACAAAAATAGAGGAGTTAAGAGAACATCTATTGAAATGGGGATTTACTACACCAGATAAAAAACATCAGAAAGAACCCCCATTCCTTTGGATGGGGTATGAACTCCATCCTGATAAATGGACAGTACAGCCTATACAACTGCCAGAAAAGGACAGCTGGACTGTCAATGATATACAGAAGTTAGTAGGAAAATTAAATTGGGCAAGTCAGATTTATCCAGGGATTAAAATAAAGCAATTATGTAAACTCCTTAGGGGAGCCAAGGCACTAACAGACATAGTGCCACTGACTGAAGAAGCAGAGTTAGAATTGGCAGAGAACAGGGAGATTCTAAAAGAACCGGTACATGGGGTATATTATGACCCATCAAAAGACTTAATAGCAGAACTGCAGAAACAAGGGCAAGGCCAATGGACATATCAAATTTATCAAGAGCCATTTAAAAACCTAAAAACAGGAAAGTATGCAAAAACAAGGTCTGCCCACACTAATGATATAAAAGAATTAACAGATGCAGTGCAAAAGGTAGCTAGGGAATGCATAGTAATATGGGGAAAGAGTCCTAAGTTTAGGCTACCCATACAAAAGGAAACATGGGAGGCATGGTGGACAGATTATTGGCAAGCCACCTGGATTCCTGAATGGGAGTTTGTCAATACCCCCCCTCTAGTAAAACTATGGTATCAGTTAGAAACAGAGCCCATCATAGGAGCAGAAACCTTCTATGTAGATGGGGCATCTAATAGAGAGACCAAAAAAGGAAAAGCAGGATATGTTACTGACAGAGGAAGACAAAAGGCTGTCATCCTAACTGAAACCACAAATCAGAAGGCTGAGTTACAAGCAATTCATTTAGCTTTACAGGATTCAGGATCAGAAGTGAATATAGTAACAGACTCACAGTATGTATTAGGAATTATTCAAGCACAACCAGATAAGAGTGAATCAGAGATAGTCAATAAAATAATAGAGAAATTAATACAAAAGGAAAGGGTCTACCTGTCATGGGTACCAGCACACAAAGGGATTGGAGGAAATGAACAAGTAGATAGATTAGTCAGTGCTGGAATCAGGAAAATACTGTTTTTAGATGGGATAGATAAGGCACAAGAAGAACATGAAAAATATCACAACAACTGGAGAGCAATGGCTAGTGATTTTAATCTGCCACCAGTAGTAGCAAAAGAAATAGTAGCTAGCTGTGATAAATGTCAGCTAAAAGGAGAGGCCATGCATGGACAAGTAGACTGTAGTCCAGGAATATGGCAATTAGATTGTACACATTTAGAAGGAAAAATTATCCTAGTAGCAGTCCATGTAGCTAGTGGATATATAGAAGCAGAAGTCATTCCAGCAGAAACAGGACAGGAAACAGCCTACTTCATACTAAAGTTAGCAGGAAGATGGCCAGTAAAAATAATACATACAGACAATGGTAGCAATTTCACCAGTAGTGCAGTTAAGGCAGCCTGTTGGTGGGCAGGTATACAGCAGGAATTTGGAATTCCCTACAATCCCCAAAGTCAAGGAGTAGTAGAATCCATGAATAAAGAATTAAAGAAAATCATAGGACAAGTAAGAGATCAAGCTGAACATCTTAAGACAGCAGTACAAATGGCGGTATTCATTCACAATTTTAAAAGAAAAGGGGGGATTGGGGGGTACAGTGCAGGGGAAAGAATAATAGACATAATATCAACAGACATACAAACTAGAGAATTACAAAAACAAATTATAAAAATTCAAAATTTCCGGGTTTATTACAGGGACAGCAGAGACCCAGTTTGGAAAGGACCAGCAAAGCTACTCTGGAAAGGTGAAGGGGCAGTAGTCATACAAGACAATAGTGAAATAAAAGTAGTACCAAGAAGAAAAGCAAAGATCATTAGAGATTATGGAAAACAGATGGCAGGTGATGATTGTGTGGCAGGTAGACAGGATGAGGATTAGCACATGGAAAAGTTTAGTAAAATACCATATGCATGTTTCAAAGAAAGCCAAAAATTGGTTTTATAGACATCATTTTCAAAGCAGGCATCCAAAAATAAGTTCAGAAGTACACATCCCACTAGAAGAAGCTAAATTAGTAGTAACAACATATTGGGGTCTGCATACAGGAGAAAGAGATTGGCATCTGGGTCAGGGAGTCTCCATAGAATGGAGGCAGGGACGGTATAGGACACAAATAGATCCTGACCTGGCAGACCAACTGATCCATATATATTATTTTGATTGTTTTTCAGCCTCTGCCATAAGGAAAGCCATCTTAGGACATAGAATTAGCCCTAGGTGTAACTATCAAGCAGGACATAACAAGGTAGGATCCCTACAATATTTGGCACTAACAGCATTAATAGCTCCAAAGAAGACAAAGCCGCCTTTGCCTAGTGTCAAGAAACTAGTAGAAGATAGATGGAACAAGCCCCAGGAGACCAGGGGCCACAGAGGGAGCCATACAATGAATGGACACTAGAGCTTTTAGAGGAGCTTAAGAATGAAGCTATTAGACATTTTCCTAGGCCATGGCTTCATGGATTAGGACAATATATCTATAACACCTATGGGGATACTTGGGAAGGAGTTGAAGCTATAATAAGGATACTGCAACAACTACTGTTTATCCATTTCAGAATTGGGTGCCAACATAGCAGAATAGGCATTATTCGACAGAGAAGAGTAAGAAATGGAACTAGTAGATCCTAACTTAGATCCCTGGAATCAACCAGGAAGCCAGCCTACAACTCCTTGTACCAAATGTTATTGTAAAAAGTGTTGCTTTCATTGCTACTGCTGCTTTGCAACGAAGGGCTTAGGCATCTCCTATGGCAGGAAGAAGCGGAGACAACGACGAAGAACTCCTCAGAGCAGTCAGAGCCATAAAAATCCTATACCAGAGCAGTAAGTATTATAGTATATGTAATGTCCAATCTGTATGTATTATCAATAGTAGCATTTATAATAGCATTAATAATAGCAATAGTTGTGTGGACTATAGTATTTATAGAATATAAGAAATTGTTAAGGCAAAGAAAAATAAATAGGTTATATGAAAGAATAAGAGAAAGAGCAGAAGACAGTGGCAATGAGAGTGAGGGTGATGCAGAGGAACTGGCAGCACTTGGGGAAATGGGGTCTTTTATTTCTGGGGATATTAATAATCTGTAGTGCTGCAGACAACTTGTGGGTTACAGTCTATTATGGGGTACCTGTGTGGAAAGAAGCAACTACTACGTTATTTTGTGCATCAGATGCTAAAGGATATGAAAGAGAAGTGCATAATGTCTGGGCCACACATGCCTGCGTACCCACAGACCCCAACCCACAGGAAATATGGCTGAAAAATGTAACAGAAAATTTTGATATGTGGAAAAATAACATGGTAGAACAAATGCATGAAGATATAATCAGTTTATGGGATCAAAGCCTAAAGCCATGTGTAAAGTTAACTCCACTCTGTGTTACTTTACACTGTAGTGATGTCAATATCACTAGTAATGCCACTACCACTAATGACACCAGCACCCCGGAAGAGTCAGGGGCAATACAAAACTGTTCTTTCAATATGACCACAGAAGTAAAAGACAAGAAGCTGAGAGTAAATGCACTCTTTTATAAACTTGATATAATACCAATCAATAACAGCAGTAGTAGTGACTATAGGCTAATAAATTGTAATACCTCAACCATTAAACAGGCTTGTCCAAAGGTATCTTGGGATCCAATTCCCATACATTATTGTGCTCCAGCTGGTTATGCGATTCTAAAGTGTAGGGATCCAAGGTTCAATGGGACAGGGCCATGCAAGAATGTCAGCACAGTACAATGTACACATGGAATTAGGCCAGTGGTATCAACTCAATTGCTGTTAAATGGCAGCCTGGCAGAAGAAGATATAATAATCAGATCTCAAAATATCTCAGATAATGCAAAAACCATAATAGTACACCTTAATGAAAGTGTACAGATTAATTGTACAAGACCCAACAACAATACAAGAAAAAGTATACATTTAGGACCAGGACAAGCATTCTATGCAACAGGTGATATAATAGGAGATATAAAAAAGGCATATTGTGAAATTAATGGAACACAATGGAGTAAAACTAAAACACAGGTACAAGAAAAGTTACGGGCTCTTTTTAATAAAACAATAAAATTTAACCAATCCTCAGGAGGGGACCTAGAAATTACAATGCATAGTTTTAATTGTAGAGGAGAGTTCTTCTACTGCGATACATCAGGATTGTTTAATGAAAGTGAAAAGTACAATGGCACTATCATTCTCCCATGTAAAATAAAACAAATTATAAACATGTGGCAGGGAGTAGGACAAGCAATGTATTCCGCTCCCATTGCAGGACGCATTAACTGTAACTCAACTATTACAGGCCTACTATTAACAAGAGATGGTGGTCAGAGTAATGATACTAATAGGACTGAGACTTTCAGACCTGAGGGAGGAAACATGAAAGACAATTGGAGAAATGAACTATATAAATATAAAGTAGTAGAAATTGAACCACTAGGAGTAGCACCCACCAAGGCAAGAAGACGAGTGGTGCAGAGAGAAAGAAGAGCAGTGGGAATAGGAGCTCTGTTCCTTAGATTCTTGGGAGCAGCAGGAAGCAACATAGGCGCAGCGTCAATAACGCTGACGGTACAGGCCAGACAATTACTGTCTGGAATAGTGCAGCAGCAAAACAATTTGCTGAGGGCTATTGAAGCGCAACAGCATCTGTTGCAGCTCACAGTCTGGGGCATTAAACAGCTCCAGGCAAGAGTCCTTGCTGTAGAAAGATACCTAAAGGATCAACAGCTCCTAGGGATTTGGGGCTGCTCTGGAAAACTCATCTGCACCACTAACGTGCCTTGGAACACTAGTTGGAGTAATAAATCTCATGATGAGATTTGGAACAACATGACCTGGATGCAGTGGGAAAAAGAGATTAACAATTACTCAAACACAATATACAGGTTAATTGAAGAATCGCAGAACCAACAGGAAAAGAATGAACAAGAATTATTGGCATTGGACAAATGGGCAAGTCTGTGGAGTTGGTTTGACATATCAAATTGGCTGTGGTATATAAAAATATTCATAATGATAGTAGGAGGAATGATAGGCTTAAGAATAGTTTTTGCTGTGCTTTCTATAGTAAATAGAGTTAGGAAGGGATACTCACCTTTGTCATTACAGACCCTTATCCCAAGCCCGAGGGGACCCGACAGGCCCGAAGGAATCGAAGAAGGAGGTGGAGAGCAAGACAGAAACAGATCCGTTCGATTAGTGAACGGATTCTTGTCGCTTGTCTGGGACGACCTGAGGAACCTGTGCCTCTTCAGCTACCGCCACTTGAGAGACTTCATATTAATTGCAGCAAGGACTGTGGACAGGGGACTAACGAGGGGGTGGGAAACCCTCAAATATCTATGGAACCTCGCACAGTATTGGAGTCAGGAACTAAAGAATAGTGCTATTAGCTTGCTTAATACCACAGCAATAGTAGTAGCTGAGGGAACAGATAGAGTTATAGAAGTTTTGCAAAGAGCTGGTAGAGCTGTTCTCAACGTACCTAGAAGGATAAGACAGGGCTTAGAAAGGAGTTTGCTATAAAATGGGTGGTAAGTGGTCAAAAAGTAGTATAGTTGGATGGCCTGCTGTAAGGGAAAGAATGAGAAGGACCCCTCCAGCAGCAGAAGGGGTGGGAGCAGTGTCTCAAGACTTAGATAGGCGAGGGGCAGTTACAAGCAGCAATACTGCAGCTACTAATCCTGACTTGGCCTGGCTGGAAGCACAAGAGGATGAGGAAGTAGGCTTTCCAGTCAGACCTCAGGTACCTTTAAGACCTATGACTTTTAAGGCAGCTGTAGATCTCAGCCACTTTTTAAAAGAAAAGGGGGGACTGGAAGGGTTAATTTACTCCAAGAAAAGACAAGAAATCCTTGATCTGTGGGTTTACCACACACAAGGCTTCTTCCCTGATTGGCAGAACTACACCCCAGGGCCAGGGATTAGATTCCCATTGACTTTTGGATGGTGCTTCAAGCTAGTACCAGTTGATCCAGATGAGGTAGAAAAGGCCAATGAAGGAGAAAACAACTGCTTGCTACACCCAATGAGCCAACATGGAATGGATGATGAAGACAGAGAAGTACTGAGATGGGAGTTTGACAGTCGTCTGGCATTTAGACACATAGCCAGAGAGAAACATCCTGAGTTCTATCAAAACTGATGACACAGGACACAGAGATTGCTGACACAGAAG
>F1.FI.93.FIN9363_AF075703_G.NG.01.01NGPL0669_DQ168576
AAAGCGAAAGTAGAACCAGAGAAGATCTCTCGACGCAGGACTCGGCTTGCTGAAGTGCACACGGCAAGAGGCGAGAGCGGCGACTGGTGAGTACGCCAATTTTTGACTAGCGGAGGCTAGAAGGAGAGAGATGGGTGCGAGAGCGTCAGTATTAAGCGGGGGAAAACTAGATGCATGGGAAAAAATTCGGTTAAGGCCGGGGGGAAAGAAACAATATAGAATAAAACATCTAGTATGGGCAAGCAGGGAGCTAGAACGATTTGCAATAGATCCTGGCCTTCTAGAAACATCAGAAGGCTGTCAAAAAATAATAGCACAGATACAGCCATCCATTCAGACAGGATCAGAAGAGCTTAGATCATTATATAACACAATAGCAGTCCTCTATTTTGTACATCAAAAGATAGAGGTAAAGGACACCAAGGAAGCTTTAGATAAGCTAGAGGAAGAACAAAACAAAAGTCAGCAAAAGACACAGCAAGCGGCAGCTGCAGCTGACAAAGGGGTCAGTCAAAATTACCCTATAGTACAGAATCTTCAGGGACAAATGGTACATCAGGCTATATCACCTAGAACTTTAAATGCATGGGTAAAGGTGATAGAAGAGAAGGCTTTTAGCCCAGAAGTTATACCCATGTTTTCAGCATTATCAGAAGGGGCCACTCCACAAGATTTAAACACCATGCTAAATACAGTGGGGGGACATCAAGCAGCCATGCAAATGTTAAAAGACACCATTAATGAGGAAGCTGCAGAATGGGACAGATTACATCCAGTGCATGCAGGACCTATTCCACCAGGCCAGATGAGGGAACCTAGGGGAAGCGATATAGCTGGAACTACTAGTACCCTTCAGGAACAAATACAATGGATGACAAGTAACCCACCTGTCCCAGTGGGAGACATCTATAAAAGATGGATCATCCTAGGATTAAATAAAATAGTAAGGATGTATAGCCCTGTCAGCATTTTGGACATAAGACAAGGGCCAAAAGAACCCTTTAGAGACTATGTAGACAGGTTCTTTAAAGCTCTAAGAGCTGAGCAAGCTACACAGGAAGTAAAGGGTTGGATGACAGACACCTTGTTGGTCCAAAATGCGAATCCAGATTGTAAGATCATTTTAAAAGGATTGGGAATAGGGGCTACACTAGAAGAAATGATGACAGCATGTCGGGGAGTGGGAGGACCTGGCCATAAGGCAAGAATTTTGGCTGAGGCAATGAGCCAAGCAAATACAACCATAATGATGCAGAAAAGTAATTTTAGGGGCCAAAGAAGAATTGTTAAATGTTTTAATTGTGGCAAAGAAGGACACATAGCCAGAAATTGCAGGGCCCCCAGGAAAAAGGGCTGTTGGAAATGTGGACAAGAAGGGCACCAAATGAAAGACTGCACTGAAAGACAGGCTAATTTTTTAGGGAAAATTTGGCCTTCCAACAAGGGGAGGCCCGGAAATTTCCTTCAGAGTAGACCAGAGCCAACAGCCCCGCCAGCAGAGAGCCTCGGGATCAGAGAAGAGGTAACTCCCTCTCCGAGGCAGGAGCAGAAAGAAGAGGGACAGTACCCTCCCTTAGCTTCCCTCAAATCACTCTTTGGCAACGACCCCTAGTCACAATAAAAATAGGGGGACAGCTAAAGGAAGCTCTATTAGATACAGGAGCAGATGATACAGTATTAGAAGACATAAATTTGCCAGGAAAATGGAAACCAAAAATGATAGGGGGAATTGGAGGTTTTATTAAAGTAAAACAGTATGATCACATACCTATAGAAATTGAGGGGAAAAAAGCTATAGGGACAGTATTAGTAGGACCTACGCCTATCAACATAATTGGAAGAAATATGTTGACTCAGATTGGTTGTACTTTAAATTTTCCAATTAGTCCTATTGAAACTGTACCAGTAAAATTAAAGCCAGGAATGGATGGCCCAAAGGTTAAACAATGGCCATTGACAGAAGAAAAAATAAAAGCATTAACAGAGATATGTACAGATATGGAAAAAGAAGGAAAAATTTCAAGAATTGGGCCTGAAAATCCATACAATACTCCAGTATTTGCCATAAAGAAAAAAGACAGTACTAAATGGAGGAAGTTAGTAGATTTCAGAGAACTCAATAAAAGAACTCAAGATTTTTGGGAGGTTCAATTAGGAATACCACATCCTGCAGGGTTAAAAAAGAAAAAGTCAGTAACAGTACTGGATGTGGGGGATGCATATTTTTCAGTTCCCTTAGATAAAGATTTCAGGAAGTACACTGCATTCACCATACCTAGTGTCAACAATGAGACACCAGGAATTAGGTACCAGTACAATGTGCTTCCACAAGGATGGAAAGGATCACCAGCAATATTCCAATGTAGCATGACAAAAATCTTAGAGCCCTTTAGAACAAGAAATCCAGACATAGTTATCTACCAATACATGGATGATTTGTATGTAGGGTCTGACTTAGAAATAGGGCAGCATAGAACAAAAATAGAGGAGTTAAGAGAACATCTACTGAAATGGGGATTTACTACACCAGACAAAAAACATCAGAAAGAACCTCCATTCCTCTGGATGGGGTATGAACTCCATCCTGATAAATGGACAGTGCAGCCTATACAATTGCCAGACAAGGACAGCTGGACTGTCGATGATATACAGAAATTAGTAGGAAAACTAAACTGGGCAAGTCANATTTATCCAGGGATTAAAGTAAGGCAATTATGTAAACTCCTTAGAGGAGCCAAGGCACTAACAGACATGGTGCCACTGACTGCAGAAGCAAATTTAGAATTGGCAGAAAATAGGGAGATTCTAAAAGAACCAGTACATGGGGTATATTATGACCCATCAAAAGACTTAATACCAAAATTACAGAAACAAGGGCAAGGACAATGGACATATCAAATTTACCGAGAGCCATTTAAAAATCTAAAAACAGGAAAGTATGCAAAAATGAGGTCTGCCCACACTAATGATGTAAAACAATTAACAGAAGCAGTGCAAAAGATAGCTCTAGAAAGCATAGTAATATGGGGAAAGACTCCTAAGTTTAAACTACCTATTCTAAAAGAGACATGGGATACATGGTGGACAGAGTATTGGCAAGCCACCTGGATTCCTGAGTGGGAGTTTGTCAATACCCCCCCTCTAGTAAAACTATGGTATCAATTAGAAACAGAGCCCATAGCAGGAGCAGAAACATTCTATGTGGATGGGGCATCTAATAGAGAGACCAAAAAAGGAAAAGCAGGATATGTTACTGATAGAGGAAGACAAAAGGTTGTCTCCCTAACTGAGACCACAAATCAGAAGGCTGAGTTACAAGCAATTCATTTAGCTTTACAGGATTCAGGATCAGAAGTGAACATAGTAACAGATTCACAATATGCATTAGGAATCATTCAAGCACAACCAGATAAGAGTGAATCAGAGTTAGTCAATCAAATAATAGAGCAGTTAATACAAAAGGAAAAGATCTACCTGTCATGGGTACCAGCACACAAAGGGATTGGAGGAAATGAACAAGTAGATAAATTAGTCAGTGCTGGAATCAGAAAAATACTGTTTTTAGATGGGATAGATAAGGCACAAGAGGAACATGAAAAATATCACAACAATTGGAGAGCAATGGCTAGTGATTTTAATCTGCCACCTGTAGTAGCAAAAGAAATAGTAGCTAGCTGTGATAAGTGTCAGCTAAAAGGGGAAGCCATGCATGGACAAGTAGACTGTAGTCCAGGGATATGGCAATTAGATTGTACACATTTAGAAGGAAAAATTATCCTGGTAGCAGTCCATGTAGCTAGTGGATACATAGAAGCAGAAGTTATCCCAGCAGAAACAGGACAGGACACAGCCTACTTCATACTAAAGTTAGCAGGAAGATGGCCAGTAAAAATGATACATACAGACAATGGCAGCAATTTCACCAGTGCCGCGGTTAAGGCAGCCTGTTGGTGGGCAGGTATCCAGCAGGAATTTGGAATTCCCTATAACCCCCAAAGTCAAGGAGTAGTAGAATCAATGAATAAAGAGCTAAAGAAGATCATAGGACAGGTAAGAGATCAAGCTGAACATCTTAAGACAGCAGTACAAATGGCAGTATTCATCCACAATTTTAAAAGAAAAGGGGGGATTGGGGGGTACAGTGCAGGGGAAAGAATAATAGACATAATAGCAACAGACATACAAACTAAAGAATTACAAAAACAAGTTACAAAAATTCAAAATTTCCGGGTTTATTACAGGGACAGCAGAGACCCAGTTTGGAAAGGACCAGCAAAGCTACTCTGGAAAGGTGAAGGGGCAGTAGTCATACAAGACAATAGTGAAATAAAAGTAGTGCCAAGAAGAAAAGCAAAGATCATTAGGGATTATGGAAAACAGATGGCAGGTGACGATTGTGTGGCAGGTAGACAGGATGAGGATTAACACATGGAAAAGTTTAGTAAAATACCATATGCATGTTTCAAAGAAAGCCAAAAGATGGTTTTATAGACATCACTTTGAAAGCAGACATCCAAAAATAAGTTCAGAAGTACACATCCCCCTAGAGGAAGCTGAATTAGTAATAACAACATATTGGGGGCTGAATACAGGAGAAAGAGATTGGCATCTGGGTCAAGGAGTCTCCATAGAATGGAGGCAGGGGAGGTATAGGACACAAATAGACCCTGGCCTGGCAGACCAACTGATCCATATATATTACTTTGATTGTTTTTCAGAATCTGCCATAAGGAAAGCCATATTAGGACATAGAATTAGCCCTAGGTGTGACTATCAAGCAGGACATAACAAGGTAGGATCCCTACAATATTTGGCACTAACAGCATTAGTATCTCCAAAGAAGGCAAAGCCGCCTTTGCCTAGTGTCAAGAAACTAGTAGAAGACAGATGGAACAAGCCCCAGGAGATCAGGGGCCACAGAGGGAGCCATACAATGAATGGGCACTAGAACTTTTAGAGGAGCTTAAGAACGAAGCTGTTAGACATTTTCCTAGGCCATTCCTCCATGGCATAGGACAATATATCTATAACACCTATGGGGATACTTGGGAGGGAGTTGAAGCCATAATAAAAATATTGCAGCAACTACTGTTTATCCATTTCAGAATTGGGTGCCATCATAGCAGAATAGGCATTATTCGACAGAGAAGAGTAAGAAATGGAGCTAGTAGATCCTAATTTAGATCCCTGGAACCATCCAGGAAGCCAGCCTCCAACTCCTTGTAACAAATGCTATTGTAAACGGTGTTGCTTTCATTGCTACTGGTGCTTTGCAACGAAGGGCTTAGGCATCTCCTATGGCAGGAAGAAGCGGAGACAGCGACACAGAACTCCTCAAAGCAGTCAAATACATCAAGATCCTGTACCAAAGCAGTAAGTATTGTTAAGTAGTGTATGTAATGTCAGATTTGTTAGCAATAACGATAGTAGCATTTATAGTAGCCCTAATAATAGTAATAGTTGTGTGGACCATAGTATTTATAGAATATAAGAAGCTAGTAAGGCAAAGAAAAATAAATAGGTTGTATATAAGAATAAGAGAAAGAGCAGAAGACAGTGGCAATGAGAGTGAGGGGGATGCAGAGGAATTGGCAGCACTTGGGAAAATGGGGCCTTTTATTCCTGGGGATGTTAATAATCTGTAAAGCTGCGGATGACTTGTGGGTCACAATCTATTATGGGGTACCTGTGTGGAAAGAAGCAAACACCACTTTATTCTGTGCATCAGATGCTAAATCATATGAAAAAGAAGTACATAATGTCTGGGCTACACATGCCTGTGTACCCACAGACCCCAATCCACAAGAAGTAGCTCTAAATGTGACAGAAAATTTTAATATGTGGGAAAATGACATGGTAGAACAAATGCATAAAGATATAATCAGTTTATGGGATCAAAGTCTAAAGCCATGTGTAAAGCTAACCCCACTCTGTGTTACTTTAAATTGTACTAATGCCACTACCACCAATGACACTCTCTCTGACCAAAGCAGTACCCTGAAGGAAGAACCAGGGGCAATACAAAACTGTTCTTTCAATATGACCACAGAAGTAGAAGATAAGAAGCAGAAAGTACATGCGCTTTTTTATAGACTTGATATAGAACCAATCAGCAATAATAATAGCAGGGAAGAATATAGGCTAATAACTTGTAATACCTCAACCATTACACAGGCTTGTCCAAAGGTATCTTGGGATCCAATTCCCATACATTATTGTGCTCCAGCTGGTTATGCGATTCTAAAGTGTAAGGATAAAAGGTTCAATGGGACGGGGCCATGTAGGAATGTCAGCACAGTACAATGTACACATGGAATTAGGCCAGTGGTATCAACTCAATTGTTGTTAAATGGCAGCCTATCAGAAGGAGGTATAATAATCAGATCTCAAAATCTCTCAGATAATGCAAAAACTATAATAGTACACCTTAATGAATCTGTACAGATCAATTGTACAAGACCCAACAACAATACAAGAAAAAGTATACGTATAGGACCAGGACAATCATTTTATGCAACAGGAGAAATAATAGGAGACATAAGAAAGGCACATTGTAACATTAGTGGAGAACAATGGAATAAAACTTTAGACCGAGTAAAGGCAGAGTTAAAGCTTCATTTTAATAAAACAATACAATTTAACTCATCCTCAGGAGGGGACCTAGAAATTACAATGCATAGTTTTAATTGTAGAGGAGAATTTTTCTACTGCAATACATCACTACTGTTTAATAATACAGTACCTAATAATGGCACTATCACTCTCCCATGTCGAATAAAACAATTTGTAAACATGTGGCAGGAAGTAGGACGAGCAATGTATGCCGCTCCCATTGCAGGAAACATTACCTGTAACTCAAATATTACAGGTCTGCTATTGACAAGAGATGGTGGTCAGAGTAATAATAGTGATTCTGAGACCTTCAGACCTGGGGGAGGAGATATGAAAGACAATTGGAGAAGTGAACTATATAAATATAAAGTAGTAGAAATTGAACCACTAGGAGTAGCACCCACCAGGCCCAAAAGACCAGTGGTGAGGAGAGAAAGAAGAGCAGTGGCAATAGGAGCTGTATTCCTTGGGTTCTTGAGCGCAGCAGGAAGCACTATGGGCGCGGCGTCACTAACGCTGACGGTACAGGCCAGACAATTATTGTCTGGAATAGTGCAACAGCAGAACAATCTGCTGCAGGCTATTGAAGCGCAACAGCATATGTTGCAGCTCACAGTCTGGGGCATTAAACAGCTCCAGGCAAGAGTCCTGGCTGTGGAAAGATACCTAAAGGATCAACAGCTCCTAGGGCTTTGGGGATGCTCTGGAAAACTCATCTGCACCACTAATGTGCCCTGGAACTCTAGTTGGAGTAATAAATCTCAGGATGAGATTTGGAATAACATGACCTGGATGCAGTGGGAAAAAGAGATTAGCAATTACTCAAAAACAATATACATGTTAATTGAAAAATCGCAGAGCCAGCAGGAACGGAATGAACAAGAATTGTTGGAATTGGACAAGTGGGATAGTCTGTGGAGTTGGTTTGATATAACAAACTGGTTATGGTATATAAAAATATTCATAATGATAGTAGGAGGCTTGATAGGCTTAAGAATAGTTTTTGCTGTGCTTTCTATAGTAAATAGAGTTAGGAAGGGATACTCACCTTTGTCATTACAGACCCTTATCCCAGCCCCGACGGAACCCGACAGGCCCGAAGGAATCGAAGAAGGAGGTGGAGAGCAAGGCAAAGACAGATCCGTGCGATTAGTGAACGGATTCTTAGCTCTTGTCTGGGACGACTTGAGGAACCTGTGCCTCTTCAGCTACCGCCACTTGAGAGACTTCATATTAATTGCAGCGAGGATTGTGGACAGGGGACTGAGGAGGGGGTGGGAAGCCCTCAAATATCTGGGGAACATCATACAGTATTGGAGTCAGGAACTAAAGAATAGTGCTATTAGCTTGTTTAATACCACAGCAATAGTAGTAGCTGAGGGGACAGATAGAGTTATAGAAGCTTTGCAAAGAGCTGTTAGAGCTGTTCTCAACATACCTAGAAGAATAAGACAGAGAGTAGAAAGGGCTTTGATATAAAATGGGTGGCAAGTGGTCAAAAAGTAGTATAGTTGGATGGCCTGCTATAAGGGAAAGAATGAGACGACCCCCTCCAGCAGCAGCAGAAGGGGTGGGAGCAGTGTCTCAAGACTTAGAAAGACGGGGGGCAATTACAAGCAGCAATACTGGAGCTACTAATCCTGACTTGGCCTGGCTGGAAGCACAAGAGGACGAGGAAGTAGGCTTTCCAGTCAGACCCCAGGTACCTTTAAGACCAATGACTTATAAGGGAGCTTTTGATCTCAGTCAGTTTCNANAAGAAAAGGGGGGACTGGAAGGGTTAWTTTACTCCAAGAAAAGACAAGAGATCCTTGATCTGTGGCTTTACCACACACAAGGCTACTTCCCCTGATTGGCAGAACTACACACCAGGGCCGGGGGGTCAGATATCCCCTGACCTTTGGGTGGTGCTTCAAGCTAGTACCAGTTGAGCCAGAGGAGGTAGAAAAGGCCAATGAAGGAGAGAACAACTGCTTGCTACACCCCATGAGCCAACATGGAATGGAGGATGAAGACAGAGAAGTACTGAAATGGAAGTTTGACAGCCGCCTGGCACTGAAACACATAGCCAGAGAGAGACATCCGGAGTTCTACCGAGACTGAGATTGCTGACACAGAGATTGCTGACACAGAAGAATCTAAGGGACTTTCCACTGGGGACTTTCCAGAGGGCGGTCCAGAGGGCGGGACTGGGGAGTGGCTCACCCTCAGATGCTGCATATAAGCAGCCGCTTTTCGCTTGTACAGGGTCTCTCTGGTTAGACCAGATTTGAGCCTGGGAGCTCTCTGGCTAGCTGAGAACCCGCTGCTTAA
>F1.FI.93.FIN9363_AF075703_H.CF.90.056_AF005496
AAAGCGAAAGTAGAACCAGAGAAGATCTCTCGACGCAGGACTCGGCTTGCTGAAGTGCACACGGCAAGAGGCGAGAGCGGCGACTGGTGAGTACGCCAATTTTTGACTAGCGGAGGCTAGAAGGAGAGAGATGGGTGCGAGAGCGTCAGTATTAAGCGGGGGAAAACTAGATGCATGGGAAAAAATTCGGTTAAGGCCGGGGGGAAAGAAACAATATAGAATAAAACATCTAGTATGGGCAAGCAGGGAGCTAGAACGATTTGCAATAGATCCTGGCCTTCTAGAAACATCAGAAGGCTGTCAAAAAATAATAGCACAGATACAGCCATCCATTCAGACAGGATCAGAAGAGCTTAGATCATTATATAACACAATAGCAGTCCTCTATTTTGTACATCAAAAGATAGAGGTAAAGGACACCAAGGAAGCTTTAGATAAGCTAGAGGAAGAACAAAACAAAAGTCAGCAAAAGACACAGCAAGCGGCAGCTGCAGCTGACAAAGGGGTCAGTCAAAATTACCCTATAGTACAGAATCTTCAGGGACAAATGGTACATCAGGCTATATCACCTAGAACTTTAAATGCATGGGTAAAGGTGATAGAAGAGAAGGCTTTTAGCCCAGAAGTTATACCCATGTTTTCAGCATTATCAGAAGGGGCCACTCCACAAGATTTAAACACCATGCTAAATACAGTGGGGGGACATCAAGCAGCCATGCAAATGTTAAAAGACACCATTAATGAGGAAGCTGCAGAATGGGACAGATTACATCCAGTGCATGCAGGACCTATTCCACCAGGCCAGATGAGGGAACCTAGGGGAAGCGATATAGCTGGAACTACTAGTACCCTTCAGGAACAAATACAATGGATGACAAGTAACCCACCTGTCCCAGTGGGAGACATCTATAAAAGATGGATCATCCTAGGATTAAATAAAATAGTAAGGATGTATAGCCCTGTCAGCATTTTGGACATAAGACAAGGGCCAAAAGAACCCTTTAGAGACTATGTAGACAGGTTCTTTAAAGCTCTAAGAGCTGAGCAAGCTACACAGGAAGTAAAGGGTTGGATGACAGACACCTTGTTGGTCCAAAATGCGAATCCAGATTGTAAGATCATTTTAAAAGGATTGGGAATAGGGGCTACACTAGAAGAAATGATGACAGCATGTCGGGGAGTGGGAGGACCTGGCCATAAGGCAAGAATTTTGGCTGAGGCAATGAGCCAAGCAAATACAACCATAATGATGCAGAAAAGTAATTTTAGGGGCCAAAGAAGAATTGTTAAATGTTTTAATTGTGGCAAAGAAGGACACATAGCCAGAAATTGCAGGGCCCCCAGGAAAAAGGGCTGTTGGAAATGTGGACAAGAAGGGCACCAAATGAAAGACTGCACTGAAAGACAGGCTAATTTTTTAGGGAAAATTTGGCCTTCCAACAAGGGGAGGCCCGGAAATTTCCTTCAGAGTAGACCAGAGCCAACAGCCCCGCCAGCAGAGAGCCTCGGGATCAGAGAAGAGGTAACTCCCTCTCCGAGGCAGGAGCAGAAAGAAGAGGGACAGTACCCTCCCTTAGCTTCCCTCAAATCACTCTTTGGCAACGACCCCTAGTCACAATAAAAATAGGGGGACAGCTAAAGGAAGCTCTATTAGATACAGGAGCAGATGATACAGTATTAGAAGACATAAATTTGCCAGGAAAATGGAAACCAAAAATGATAGGGGGAATTGGAGGTTTTATTAAAGTAAAACAGTATGATCACATACTCATAGAAATTTGTGGACATAAAGCCATAGGTACAGTGTTAGTAGGACCTACGCCTGTCAACATAGTTGGAAGAAATATGTTGACTCAAATTGGTTGTACTTTAAATTTTCCAATTAGTCCTATTGAAACTGTACCAGTAAAACTGAAACCAGGAATGGATGGCCCAAAGGTTAAACAATGGCCATTGACAGAAGAAAAAATAAAAGCATTAACAGAGATATGTACAGATATGGAAAAAGAAGGAAAAATTTCAAGAATTGGGCCTGAAAATCCATACAATACTCCAGTATTTGCCATAAAGAAAAAAGACAGTACTAAATGGAGGAAGTTAGTAGATTTCAGAGAACTCAATAAAAGAACTCAAGATTTTTGGGAGGTTCAATTAGGAATACCACATCCTGCAGGGTTAAAAAAGAAAAAGTCAGTAACAGTACTGGATGTGGGGGATGCATATTTTTCAGTTCCCTTAGATAAAGATTTCAGGAAGTACACTGCATTCACCATACCTAGTGTCAACAATGAGACACCAGGAATTAGGTACCAGTACAATGTGCTTCCACAAGGATGGAAAGGATCACCAGCAATATTCCAATGTAGCATGACAAAAATCTTAGAGCCCTTTAGAACAAGAAATCCAGACATAGTTATCTACCAATACATGGATGATTTGTATGTAGGGTCTGACTTAGAAATAGGGCAGCATAGAACAAAAATAGAGGAGTTAAGAGAACATCTACTGAAATGGGGATTTACTACACCAGACAAAAAACATCAGAAAGAACCTCCATTCCTCTGGATGGGGTATGAACTCCATCCTGATAAATGGACAGTGCAGCCTATACAATTGCCAGACAAGGACAGCTGGACTGTCGATGATATACAGAAATTAGTAGGAAAACTAAACTGGGCAAGTCANATTTATCCAGGGATTAAAGTAAGGCAATTATGTAAACTCCTTAGAGGAGCCAAGGCACTAACAGACATGGTGCCACTGACTGCAGAAGCAAATTTAGAATTGGCAGAAAATAGGGAGATTCTAAAAGAACCAGTACATGGGGTATATTATGACCCATCAAAAGACTTAATACCAAAATTACAGAAACAAGGGCAAGGACAATGGACATATCAAATTTACCGAGAGCCATTTAAAAATCTAAAAACAGGAAAGTATGCAAAAATGAGGTCTGCCCACACTAATGATGTAAAACAATTAACAGAAGCAGTGCAAAAGATAGCTCTAGAAAGCATAGTAATATGGGGAAAGACTCCTAAGTTTAAACTACCTATTCTAAAAGAGACATGGGATACATGGTGGACAGAGTATTGGCAAGCCACCTGGATTCCTGAGTGGGAGTTTGTCAATACCCCCCCTCTAGTAAAACTATGGTATCAATTAGAAACAGAGCCCATAGCAGGAGCAGAAACATTCTATGTGGATGGGGCATCTAATAGAGAGACCAAAAAAGGAAAAGCAGGATATGTTACTGATAGAGGAAGACAAAAGGTTGTCTCCCTAACTGAGACCACAAATCAGAAGGCTGAGTTACAAGCAATTCATTTAGCTTTACAGGATTCAGGATCAGAAGTGAACATAGTAACAGATTCACAATATGCATTAGGAATCATTCAAGCACAACCAGATAAGAGTGAATCAGAGTTAGTCAATCAAATAATAGAGCAGTTAATACAAAAGGAAAAGATCTACCTGTCATGGGTACCAGCACACAAAGGGATTGGAGGAAATGAACAAGTAGATAAATTAGTCAGTGCTGGAATCAGAAAAATACTGTTTTTAGATGGGATAGATAAGGCACAAGAGGAACATGAAAAATATCACAACAATTGGAGAGCAATGGCTAGTGATTTTAATCTGCCACCTGTAGTAGCAAAAGAAATAGTAGCTAGCTGTGATAAGTGTCAGCTAAAAGGGGAAGCCATGCATGGACAAGTAGACTGTAGTCCAGGGATATGGCAATTAGATTGTACACATTTAGAAGGAAAAATTATCCTGGTAGCAGTCCATGTAGCTAGTGGATACATAGAAGCAGAAGTTATCCCAGCAGAAACAGGACAGGACACAGCCTACTTCATACTAAAGTTAGCAGGAAGATGGCCAGTAAAAATGATACATACAGACAATGGCAGCAATTTCACCAGTGCCGCGGTTAAGGCAGCCTGTTGGTGGGCAGGTATCCAGCAGGAATTTGGAATTCCCTATAACCCCCAAAGTCAAGGAGTAGTAGAATCAATGAATAAAGAGCTAAAGAAGATCATAGGACAGGTAAGAGATCAAGCTGAACATCTTAAGACAGCAGTACAAATGGCAGTATTCATCCACAATTTTAAAAGAAAAGGGGGGATTGGGGGGTACAGTGCAGGGGAAAGAATAATAGACATAATAGCAACAGACATACAAACTAAAGAATTACAAAAACAAGTTACAAAAATTCAAAATTTCCGGGTTTATTACAGGGACAGCAGAGACCCAGTTTGGAAAGGACCAGCAAAGCTACTCTGGAAAGGTGAAGGGGCAGTAGTCATACAAGACAATAGTGAAATAAAAGTAGTGCCAAGAAGAAAAGCAAAGATCATTAGGGATTATGGAAAACAGATGGCAGGTGACGATTGTGTGGCAGGTAGACAGGATGAGGATTAACACATGGAAAAGTTTAGTAAAATACCATATGCATGTTTCAAAGAAAGCCAAAAGATGGTTTTATAGACATCACTTTGAAAGCAGACATCCAAAAATAAGTTCAGAAGTACACATCCCCCTAGAGGAAGCTGAATTAGTAATAACAACATATTGGGGGCTGAATACAGGAGAAAGAGATTGGCATCTGGGTCAAGGAGTCTCCATAGAATGGAGGCAGGGGAGGTATAGGACACAAATAGACCCTGGCCTGGCAGACCAACTGATCCATATATATTACTTTGATTGTTTTTCAGAATCTGCCATAAGGAAAGCCATATTAGGACATAGAATTAGCCCTAGGTGTGACTATCAAGCAGGACATAACAAGGTAGGATCCCTACAATATTTGGCACTAACAGCATTAGTATCTCCAAAGAAGGCAAAGCCGCCTTTGCCTAGTGTCAAGAAACTAGTAGAAGACAGATGGAACAAGCCCCAGGAGATCAGGGGCCACAGAGGGAGCCATACAATGAATGGGCACTAGAACTTTTAGAGGAGCTTAAGAACGAAGCTGTTAGACATTTTCCTAGGCCATTCCTCCATGGCATAGGACAATATATCTATAACACCTATGGGGATACTTGGGAGGGAGTTGAAGCCATAATAAAAATATTGCAGCAACTACTGTTTATCCATTTCAGAATTGGGTGCCATCATAGCAGAATAGGCATTATTCGACAGAGAAGAGTAAGAAATGGAGCTAGTAGATCCTAATTTAGATCCCTGGAACCATCCAGGAAGCCAGCCTCCAACTCCTTGTAACAAATGCTATTGTAAACGGTGTTGCTTTCATTGCTACTGGTGCTTTGCAACGAAGGGCTTAGGCATCTCCTATGGCAGGAAGAAGCGGAGACAGCGACACAGAACTCCTCAAAGCAGTCAAATACATCAAGATCCTGTACCAAAGCAGTAAGTATTGTTAAGTAGTGTATGTAATGTCAGATTTGTTAGCAATAACGATAGTAGCATTTATAGTAGCCCTAATAATAGTAATAGTTGTGTGGACCATAGTATTTATAGAATATAAGAAGCTAGTAAGGCAAAGAAAAATAAATAGGTTGTATATAAGAATAAGAGAAAGAGCAGAAGACAGTGGCAATGAGAGTGAGGGGGATGCAGAGGAATTGGCAGCACTTGGGAAAATGGGGCCTTTTATTCCTGGGGATGTTAATAATCTGTAAAGCTGCGGATGACTTGTGGGTCACAATCTATTATGGGGTACCTGTGTGGAAAGAAGCAAACACCACTTTATTCTGTGCATCAGATGCTAAATCATATGAAAAAGAAGTACATAATGTCTGGGCTACACATGCCTGTGTACCCACAGACCCCAATCCACAAGAAGTAGCTCTAAATGTGACAGAAAATTTTAATATGTGGGAAAATGACATGGTAGAACAAATGCATAAAGATATAATCAGTTTATGGGATCAAAGTCTAAAGCCATGTGTAAAGCTAACCCCACTCTGTGTTACTTTAAATTGTACTAATGCCACTACCACCAATGACACTCTCTCTGACCAAAGCAGTACCCTGAAGGAAGAACCAGGGGCAATACAAAACTGTTCTTTCAATATGACCACAGAAGTAGAAGATAAGAAGCAGAAAGTACATGCGCTTTTTTATAGACTTGATATAGAACCAATCAGCAATAATAATAGCAGGGAAGAATATAGGCTAATAACTTGTAATACCTCAACCATTACACAGGCTTGTCCAAAGGTATCTTGGGATCCAATTCCCATACATTATTGTGCTCCAGCTGGTTATGCGATTCTAAAGTGTAAGGATAAAAGGTTCAATGGGACGGGGCCATGTAGGAATGTCAGCACAGTACAATGTACACATGGAATTAGGCCAGTGGTATCAACTCAATTGTTGTTAAATGGCAGCCTATCAGAAGGAGGTATAATAATCAGATCTCAAAATCTCTCAGATAATGCAAAAACTATAATAGTACACCTTAATGAATCTGTACAGATCAATTGTACAAGACCCAACAACAATACAAGAAAAAGTATACGTATAGGACCAGGACAATCATTTTATGCAACAGGAGAAATAATAGGAGACATAAGAAAGGCACATTGTAACATTAGTGGAGAACAATGGAATAAAACTTTAGACCGAGTAAAGGCAGAGTTAAAGCTTCATTTTAATAAAACAATACAATTTAACTCATCCTCAGGAGGGGACCTAGAAATTACAATGCATAGTTTTAATTGTAGAGGAGAATTTTTCTACTGCAATACATCACTACTGTTTAATAATACAGTACCTAATAATGGCACTATCACTCTCCCATGTCGAATAAAACAATTTGTAAACATGTGGCAGGAAGTAGGACGAGCAATGTATGCCGCTCCCATTGCAGGAAACATTACCTGTAACTCAAATATTACAGGTCTGCTATTGACAAGAGATGGTGGTCAGAGTAATAATAGTGATTCTGAGACCTTCAGACCTGGGGGAGGAGATATGAAAGACAATTGGAGAAGTGAACTATATAAATATAAAGTAGTAGAAATTGAACCACTAGGAGTAGCACCCACCAGGCCCAAAAGACCAGTGGTGAGGAGAGAAAGAAGAGCAGTGGCAATAGGAGCTGTATTCCTTGGGTTCTTGAGCGCAGCAGGAAGCACTATGGGCGCGGCGTCACTAACGCTGACGGTACAGGCCAGACAATTATTGTCTGGAATAGTGCAACAGCAGAACAATCTGCTGCAGGCTATTGAAGCGCAACAGCATATGTTGCAGCTCACAGTCTGGGGCATTAAACAGCTCCAGGCAAGAGTCCTGGCTGTGGAAAGATACCTAAAGGATCAACAGCTCCTAGGGCTTTGGGGATGCTCTGGAAAACTCATCTGCACCACTAATGTGCCCTGGAACTCTAGTTGGAGTAATAAATCTCAGGATGAGATTTGGAATAACATGACCTGGATGCAGTGGGAAAAAGAGATTAGCAATTACTCAAAAACAATATACATGTTAATTGAAAAATCGCAGAGCCAGCAGGAACGGAATGAACAAGAATTGTTGGAATTGGACAAGTGGGATAGTCTGTGGAGTTGGTTTGATATAACAAACTGGTTATGGTATATAAAAATATTCATAATGATAGTAGGAGGCTTGATAGGCTTAAGAATAGTTTTTGCTGTGCTTTCTATAGTAAATAGAGTTAGGAAGGGATACTCACCTTTGTCATTACAGACCCTTATCCCAGCCCCGACGGAACCCGACAGGCCCGAAGGAATCGAAGAAGGAGGTGGAGAGCAAGGCAAAGACAGATCCGTGCGATTAGTGAACGGATTCTTAGCTCTTGTCTGGGACGACTTGAGGAACCTGTGCCTCTTCAGCTACCGCCACTTGAGAGACTTCATATTAATTGCAGCGAGGATTGTGGACAGGGGACTGAGGAGGGGGTGGGAAGCCCTCAAATATCTGGGGAACATCATACAGTATTGGAGTCAGGAACTAAAGAATAGTGCTATTAGCTTGTTTAATACCACAGCAATAGTAGTAGCTGAGGGGACAGATAGAGTTATAGAAGCTTTGCAAAGAGCTGTTAGAGCTGTTCTCAACATACCTAGAAGAATAAGACAGAGAGTAGAAAGGGCTTTGATATAAAAATGGGAGGCAAATGGTCAAAAAGTAGGATGGGTGGGTGGTCTACTATAAGGGAAAGAATGAGGCGAGCTGAACCAGTAGCAGAAGGGGTAGGAGCAGTGTCTCGAGATTTGGATAGACGCGGGGCAGTCACAATTAATAATACAGCATCTACTAATCCTGACTTGGCCTGGCTGGAAGCACAAGAGGACGAGGAAGTAGGCTTTCCAGTCAGACCCCAGGTACCTTTAAGACCAATGACTTATAAGGGAGCTTTTGATCTCAGTCAGTTTCNANAAGAAAAGGGGGGACTGGAAGGGTTAWTTTACTCCAAGAAAAGACAAGAGATCCTTGATCTGTGGCTTTACCACACACAAGGCTACTTCCCCTGATTGGCAGAACTACACACCAGGGCCGGGGGGTCAGATATCCCCTGACCTTTGGGTGGTGCTTCAAGCTAGTACCAGTTGAGCCAGAGGAGGTAGAAAAGGCCAATGAAGGAGAGAACAACTGCTTGCTACACCCCATGAGCCAACATGGAATGGAGGATGAAGACAGAGAAGTACTGAAATGGAAGTTTGACAGCCGCCTGGCACTGAAACACATAGCCAGAGAGAGACATCCGGAGTTCTACCGAGACTGAGATTGCTGACACAGAGATTGCTGACACAGAAGAATCTAAGGGACTTTCCACTGGGGACTTTCCAGAGGGCGGTCCAGAGGGCGGGACTGGGGAGTGGCTCACCCTCAGATGCTGCATATAAGCAGCCGCTTTTCGCTTGTACAGGGTCTCTCTGGTTAGACCAGATTTGAGCCTGGGAGCTCTCTGGCTAGCTGAGAACCCGCTGCTTAA
>F1.BE.93.VI850_AF077336_J.SE.94.SE7022_AF082395
GGACTTGAAGCGAAAGTAGAACCAGAGAAGATCTCTCGACGCGGGGACTCGGCTTGCTGAAGTGCAACACGGCAAGAGGCGAGAGCGGCGACTGGTGAGTACGCCGAATTTTTTTTTTGACTAGCGGAGGCTAGAAGGAGAGAGATGGGTGCGAGAGCGTCAATATTAAGCGGGGGAAAATTAGATGAATGGGAAAAAATTCAGTTAAGGCCGGGGGGAAAGAAAAGATATAAAATGAAACATCTAATATGGGCAAGCAGGGAGCTAGAACGATTTGCACTTGATCCTGGCCTTCTAGAAACATCAGAAGGCTGTCAAAAAATAATAAGACAGCTACAACCATCCCTTCAGACAGGATCAGAAGAGCTTAAGTCATTATTTAATACAGTAGCAGTCCTCTATTATGTACATCAAAGGGCAGGGGTAACAGACACCAAGGAAGCTTTAGACAAGCTAGAGGAAGAACAAAACAAAAGTCAGCAAAAGACACAGCAAGCGGCAGCTGACAAAGGGGTCAGTCAAAATTACCCTATAGTACAGAATCTTCAGGGACAAATGGTACACCAGTCTCTATCACCTAGAACTTTAAATGCATGGGTAAAGGTGATAGAAGAGAAGGCTTTTAGCCCAGAAGTAATACCCATGTTTTCAGCATTATCAGAAGGGGCCACTCCCACAGATTTAAACACCATGCTAAATACAGTGGGGGGACATCAAGCAGCCATGCAAATGTTAAAAGACACCATCAATGAGGAAGCTGCAGAATGGGACAGATTACATCCAGTGCATGCAGGGCCTGCCCCACCAGGCCAGATGAGGGAACCTAGGGGGAGTGATATAGCTGGAACTACTAGTACCCTTCAGGAACAAATACAATGGATGACGGGCAACCCACCTGTCCCAGTGGGAGACATCTATAAAAGATGGATCATCCTAGGATTAAATAAAATAGTAAGAATGTATAGTCCTGTCAGCATTTTGGACATAAAACAAGGGCCAAAAGAACCCTTTAGAGACTATGTAGACAGATTCTTTAAAGTCCTAAGAGCTGAGCAAGCTTCACAGGACGTAAAGGGTTGGATGACAGACACATTGTTGGTCCAAAATGCGAACCCAGATTGTAAGACCATTTTAAAAGCATTGGGAACAGGGGCTACACTAGAAGAAATGATGACAGCATGTCAGGGAGTGGGAGGACCTAGCCATAAGGCAAGAGTTTTGGCCGAGGCAATGAGTCAAGCAAATTCAGCCATAATGATGCAGAAAAGTAATTTTAAGGGCCAAAGAAGAGTTGTTAAATGTTTTAATTGTGGCAAAGAAGGACACATAGCCAGAAATTGCAGGGCCCCTAGAAAAAAGGGCTGTTGGAAATGTGGAAGAGAAGGACACCAAATGAAAGACTGCACTGAAAGACAGGCTAATTTTTTAGGGAAAATTTGGCCTTCCAACAAGGGGAGGCCCGGAAATTTCCTTCAGAGCAGACCAGAGCCAACAGCCCCACCAGCAGAGAGCTTCGGGTTCAGAGAGGAGATAACCCCCTCTCCGAAGCAGGAGCAGAAAGACGGGGAACTGTACCCTCCCTTAGCTTCCCTCAAATCACTCTTTGGCAACGACCCTTAGTCACAATAAAAATAGGGGGACAGATAAAGGAGGCTCTATTAGATACAGGAGCAGATGATACAGTATTAGAAGACATAAATTTGCCAGGAAAATGGAAACCAAAAATGATAGGGGGAATTGGAGGTTTTATCAAAGTAAAACAGTATGATAACATACTCATAGAAATTTGTGGACACAAGGCTATAGGTACAGTGTTAGTAGGACCTACGCCTGTCAACATAATTGGAAGAAATATGTTGACTCAGATTGGTTGTACTTTAAATTTTCCAGTTAGTCCTATTGAAACTGTACCAGTAAAATTGAAGCCAGGAATGGATGGCCCAAAGGTTAAACAATGGCCATTGACAGAAGAAAAGATAAAAGCATTAACAGAAATATGTCTAGAAATGGAAAAAGAAGGAAAAATTTCAAAAATTGGGCCTGAAAATCCATACAATACTCCAGTATTTGCCATAAAGAAAAAAGACAGTAGTAAATGGAGGAAATTAGTAGATTTCAAAGAACTTAATAAAAGAACTCAAGATTTCTGGGAGGTTCAATTAGGAATACCACATCCTGCAGGGTTAAAAAAGAAAAAGTCAGTAACAGTACTGGATGTGGGGGATGCATATTTTTCAGTTCCCTTAGATAAGGATTTCAAGAAGTACACTGCATTCACCATACCTAGTGTCAACAATGAGACACCTGGAATTAGGTACCAGTACAATGTGCTTCCACAAGGATGGAAAGGATCACCAGCAATATTCCAATGTAGCATGACAAAAATCTTAGAGCCCTTTAGAATGAAAAACCCAGACATAGTCATCTACCAATACATGGATGATTTGTATGTAGGGTCTGACTTAGAAATAGGGCAGCATAGAACAAAAATAGAGGAGTTAAGAGAACATCTACTGAGATGGGGATTTACTACACCAGACAAAAAACATCAGAAAGAACCTCCATTCCTTTGGATGGGGCATGAACTCCATCCTGATAAATGGACAGTGCAGCCTATACAATTGCCAAACAAGGACAGCTGGACTGTCAATGACATACAGAAGTTAGTAGGAAAACTAAATTGGGCAAGTCAGATTTATCCAGGGATTAAAGTAAGGCCATTATGTAAACTCCTTAGGGGAGCCAAGGCACTAACAGACATAGTGCCACTGACTGCAGAGGCAGAGTTAGAATTGGCAAAAAATAGGGAGATTCTAAGAGAACCAGTACATGGGGTATATTATGACCCATCAAAAGACTTAATAGCAGAAATACAGAAACAAGGAGACGGGCAATGGACATATCAAATTTATCAGAACCCATTTAAAAATCTAAAAACAGGAAAGTATGCAAAAGTGAGGTCGGCCCACACTAATGATGTAAAACAATTAACAGAAGCAGTACAAAAGATAGCTTTAGAAAGCATAGTAATATGGGGGAAGAGATCTCCTAAGTTTAAACTACCCATACTGAAAGAGACATGGGATACATGGTGGACAGATTATTGGCAAGCCACCTGGATTCCTGAATGGGAGTTTGTCAATACCCCCCCTCTAGTGAAACTATGGTACCAGTTAGAAACAGAGCCCATAGCAGGAGCAGACACCTTCTATGTAGATGGGGCATCTAATAGAGAGACCAAAAAAGGAAAAGCAGGATATGTTACTGATAAAGGAAAACAAAAAGTTGTCTCCCTAACGGAGACCACAAATCAGAAGGCTGAGTTACAAGCAATTTATTTAGCTTTGCAGGATTCAGGATCAGAAGTGAACATAGTAACAGACTCACAATATGCATTAGGAATCATTCAGGCGCAACCAGATAAGAGTGAATCAGAAATAGTCAATCAAATAATAGAGCAATTAATACAAAAGGAAAGGGTCTACCTGTCATGGGTACCAGCACACAAAGGGATTGGAGGAAATGAACAAGTAGATAAATTAGTCAGTGCTGGAGTCAGGAAAATACTGTTTTTAGATGGGATAGATAAGGCACAAGAAGAACATGAAAAATATCACAACAATTGGAGAGCGATGGCTAGTGATTTTAATCTGCCACCTATAGTAGCAAAAGAAATAGTAGCTAGCTGTGATAAGTGTCAGCTAAAAGGGGAAGCCATGCACGGACAAGTAGACTGTAGTCCAGGGATATGGCAATTAGATTGCACACATTTAGAAGGCAAGGTTATCCTGGTAGCAGTCCATGTAGCTAGTGAGTACATAGAAGCAGAAGTTATTCCAGCAGAAACAGGACAGGAAACAGCCTACTTCATATTAAAGTTAGCAGGAAGATGGCCAGTAAAAATAATACATACAGACAATGGCAGCAATTTCACCAGTGCCGCGGTTAAGGCATCCTGTTGGTGGGCAGGTATCCAACAGGAATTTGGAATCCCCTACAATCCCCAAAGTCAAGGAGTAGTAGAATCTATAAATAAAGAGTTAAAAAAGATCATAGGACAGGTAAGAGATCAAGCTGAACATCTTAAGACAGCAGTACAAATGGCAGTATTCATCCACAATTTTAAAAGAAAAGGGGGGATTGGGGGGTACAGTGCAGGGGAAAGAATAATAGACATAATATCAACAGACATACAAACTAGAGAATTACAAAAACAAATTACGAAAATTCAAAATTTCCGGGTTTATTACAGGGACAGCAGAAACCCAGTTTGGAAAGGACCAGCAAAGCTACTCTGGAAAGGTGAAGGGGCAGTAGTCATACAAGACAATAGTGAAATAAAGATAGTACCAAGGAGGAAAGCAAAGATCATTAGGGATTATGGAAAACAGATGGCAGTTGATGATTGTGTGGCAGGTAGACAGGATGAGGATTAACACATGGAAAAGTTTAGTAAAATATCATATGTATGTTTCAAAGAAAGCCAAAGGATGGTCTTATAGACATCACTTTCAAAGCAGGCATCCAAGAGTAAGTTCAGAAGTACACATCCCACTAGAGGAAGTTAAATTAGTAATAACAACATATTGGGGGCTGCACCCAGGAGAAAGAGAATGGCATCTGGGTCAGGGAGTCTCCATAGAATGGAGGCAGGGGAAGTATAGGACACAAATAGACCCTGGCCTGGCGGACCAACTGATCCATATATATTATTTTGATTGTTTTTCAGAATCTGCCATAAGGAAAGCCATATTAGGACATAGAATTAGCCCTAGGTGTAACTATCAAGCAGGACATAATAAGGTAGGATCCCTACAATATTTGGCACTAACAGCATTAATAGCTCCAGAGAAGACAAAGCCACCGCTGCCTAGTGTCCAGAAACTAGTAGAGGACAGATGGAACAAGCCCCAGGAGACCAGGGGCCACAGAGGGAGCCATACAATGAATGGGCACTAGAAATTTTAGAGGAGCTTAAGAATGAAGCTGTTAGGCATTTTCCTAGGCCATGGCTTCACGGCTTAGGCCAACATATCTATAACACCTATGGGGACACTTGGGAGGGAGTTGAAGCTATAATAAGGATATTGCAACAACTACTGTTTATCCATTTCAGAATTGGGTGCCGTCATAGCAGAATAGGCATTGTTCCACAGAGAAGAGTAAGAAATGGAGCCAGTAGATCCTAGCTTAGATCCCTGGAATCATCCAGGAAGCCAGCCTACAACTCCTTGTACCAAATGTTATTGTAAACGATGTTGCTTTCATTGCCAATGGTGCTTTACAACGAAGGGCTTAGGCATCTCCTATGGCAGGAAGAAGCGGAGACAGCGACACAGAACTCCTCAAAGCAGTCAAGTGCATCAAAATTCTCTACCAAAGCAGTAAGTAGTGTTAAATAGTATATGTAATGTCATATTTGTTAGCAATAGGGATAGCAGCATTAATAGTAGCACTAATAATAGCCATAGTTGTGTGGACTATAGTATATATAGAATATAAGAAACTGGTAAGGCAAAGAAAAATAAATAAATTATATAAAAGAATAAGAGAAAGAGCAGAAGACAGTGGCAATGAGAGTGAGGGGGATGCAGAGGAATTGGCAGCACTTGGGGAAATGGGGCCTTTTATTCCTGGGGATATTAATAATCTGTAATGCTGCAGACAACTTGTGGGTCACAGTCTATTATGGGGTACCTGTGTGGAAAGAAGCAACCACTACTCTATTCTGTGCATCAGATGCTAAAGCATATGAAAGAGAGGCACATAACGTTTGGGCCACACATGCCTGTGTACCCACAGACCCCAACCCACAAGAAGTATTTCTGAAAAATGTAACAGAAAATTTTGATATGTGGAAAAATAACATGGTAGAACAAATGCATACAGATATAATCAGTTTATGGGATCAAAGCCTAAAGCCATGTGTAAAGTTAACCCCACTCTGTGTGACTTTAAACTGTACTAATGCCACCAATAACAGTCAGGAAAAGCCAGGGGCAATGCAAAACTGTTCTTTCAATATGACCACAGAAGTAAGAGATAAGAAGCTGAAATTATCTGCGCTTTTTTATAGGCTTGATATAGTACCAATAGGCAATAACAATAGCAGTGAATATAGGCTAATAAATTGTAATACCTCAACCATTACACAGGCTTGTCCAAAGGTATCTTGGGATCCAATCCCTATACATTATTGTGCTCCAGCTGGTTATGCAATTCTAAAATGTAATGATAAAAGATTCAATGGGACAGGGCCATGCAAGAATGTCAGCACAGTACAATGTACACATGGAATTAAACCAGTGGTATCAACTCAATTGTTGTTAAATGGCAGCCTAGCAGAAGAAGGTATAGTAATCAGATCTCAAAATATCTCAAATAATGCAAAAACCATAATAGTACACCTTAATGAATCTGTACAGATTAATTGTACAAGACCCAACAACAATACAAGGAAAGGTATACATTTAGGACCAGGACAAACATTCTATGCAACAGGAGCAATAATAGGAGACATAAGAAAGGCACATTGTAACATTAGTGGAACACAATGGAATAACACTCTGGAGTATGTAAAGGCAGAATTAAAGTCGCATTTCCCTAATAATACAGCAATAAAATTTAACCAATCCTCAGGAGGGGACCTAGAAATTACAATGCATAGTTTTAATTGTAGAGGAGAATTTTTCTACTGCGATACATCAGGACTGTTTAATGACACAGGCTCCAATAATGGCACTATCACTCTCCCATGTCGGATAAAACAAATTGTAAACATGTGGCAGGGAGTAGGACGAGCAATGTATACCTCTCCCATTGCAGGAAACATTACCTGTAACTCAAATATTACAGGTTTACTATTGACAAGAGATGGTGGTAATGAGAGTAACATTGAGACCTTCAGACCTGAGGGAGGAAATATGAAAGACAATTGGAGAAGTGAACTATATAAGTATAAAGTAGTAGAAATTGAACCATTAGGAGTAGCACCCACCAAGGCAAAAAGACAAGTGGTGCAGAGAGAAAAAAGAGCAGCGGGACTAGGAGCTTTGTTCCTTGGGTTTCTTGGGGACAGCAGGGAGCATATGGGCGCGGCGTCGATAACGCTGACGGTACAGGCCAGACAATTATTGTCTGGAATAGTGCAACAGCAAAACAATTTGCTGAGGGCTATTGAAGCGCAACAGCATCTGTTGCAGCTCACAGTCTGGGGCATTAAACAGCTCCAGGCAAGAGTCCTGGCTGTGGAAAGATACCTAAAGGATCAACAGCTCCTAGGGATCTGGGGCTGCTCTGGAAAACTCATCTGCACCACTAATGTGCCCTGGAACTCTAGTTGGAGTAATAAATCTCAGGAAGAGATTTGGAATAACATGACCTGGATGGAGTGGGAAAAGGAGATTAGCAATTACTCAAACATAATATACAAATTGATTGAAGAGTCACAAAACCAGCAGGAAAAGAATGAACAAGAATTATTGGCATTAGACAAATGGGCAAGTCTGTGGAATTGGTTTGACATATCAAACTGGCTGTGGTATATAAAAATATTCATAATGATAGTGGGAGGCTTGATAGGCTTAAGAATAGTTTTTGCTGTACTTTCTATAGTAAATAGAGTTAGGAAGGGATACTCACCTTTGTCATTACAGACCCTTATCCCAAGCCCGAGGGGACCCGACAGGCCCGAAGGAATCGAAGAAGGAGGTGGAGAGCAAGGCAAAGACAGATCCGTGCGCTTAGTGACCGGATTCTTAGCTCTTGCCTGGGACGATCTGAGGAACCTGTGCCTCTTCAGCTACCGCCACTTGAGAGACTTCATATTAATTGCAGCGAGGATTGTGGACAGGGGCCTGAGGAGGGGGTGGGAAGCTCTCAAATATCTGGGGAATCTCACGCGGTATTGGAGTCAGGAACTAAAGAATAGTGCTATCAGCCTGTTTAATACCACAGCAATAGTAGTAGCTGAAGGGACAGATAGAATTATAGAAGTTTTGCAAAGAGCTGGTAGAGCTGTTCTCAACATACCTAGAAGAATAAGACAGGGCGCAGAAAGGGCTTTGCTGTAAAATGGGGGGCAAGTGGTCAAAAAGCAGTATAGTTGGATGGCCTGCTGTAGGGGAAAGAATGAGACAAACCCCTACAGCAGCAGAAGGGGTGGGAGCAGTGTCTCGAGACTTAGACAGACGGGGAGCAATTACAAGCAGCAATACTAGAACTACTAATCCTGACTTGGCCTGGCTGGAAGCACAAGAGGAGGAGGAAGTAGGCTTTCCAGTCAGACCTCAGGTACCTGTAAGACCAATGACCTATAAGGCAGCTGTAGATCTCAGTCACTTTTTAAAAGAAAAGGGGGGACTGGAAGGGTTAATTTACTCCAAGAAAAGAGGAGATACCCTTGATCTGTGGGTTTACCACACACAAGGCTACTTCCCTGATTGGCAGAACTACACACCAGGGCCAGGGATCAGATATCCACTGACCTTGGGATGGTGCTTCAAGCTAGTACCAGTTGATCCAGAAGAGGTGGAGGAAGCTAATGAAGGAGAGAACAACTGCCTGTTACACCCCGCATGCCAGCATGGAATAGAGGATGAAGAAAGAGAAGTGCTAAAGTGGAAGTTTGACAGCTCCCTAGCACGGAGACACATAGCCCGAGAGCTACATCCGGAGTTTTACAGAGACTGCTGACACAGAGATTGCTGACACAGAAGAATCTAAAAGGGACTTTCCACTGGGGACTTTCCAGAGGGCGGTCCAGAGGGCGGGACTGGGGAGTGGCTCACCCTCAGATGCTGCATATAAGCAGCCGCTTTTCGCCTGTACTGGGTCTCTCTAGTTAGACCAGATTTGAGCCTGGGGGCTCTCTGGCTAGCTGGGGAACCCACTGCTTA
>F1.FR.96.MP411_AJ249238_K.CD.97.EQTB11C_AJ249235
ATGGGTGCGAGAGCGTCAGTATTAAGCGGGGGAAAATTAGATGCATGGGAAAGAATTCGATTAAGACCGGGGGGAAAGAAAAAATATAGAATGAAGCATCTAGTATGGGCAAGCAGGGAGTTAGAACGATTTGCAGTTGATCCTGGACTTCTAGAAACACCAGAAGGCTGTAAGCAAATAATAAGACAGCTACAACCATCCCTTCAGACAGGATCAGAAGAGCTTAGATCATTGTTCAATACAGTAGCAGTTCTCTATTGTGTACATCAAAAGATAGAGATAAAGGACACCAAGGAAGCTTTAGAGAAGTTAGAGGAGGAACAAAACAAAGGTCAGCAAAAGACACAGCAAGCGGCAGCTGACAAAGGAGTCAGTCAAAATTACCCTATAGTACAAAATCTTCAGGGACAGATGGTACATCAGCCTATATCACCTAGAACTTTAAATGCATGGGTAAAAGTGATAGAAGAGAAGGCTTTTAGCCCAGAAGTAATACCCATGTTCTCAGCATTATCAGAAGGGGCCACCCCACAAGATTTAAACACCATGCTAAATACAGTGGGTGGACATCAAGCAGCCATGCAAATGTTAAAAGACACCATCAATGAGGAAGCTGCAGAATGGGACAGATTACATCCAGCGCATGCAGGGCCTATCCTACCAGGCCAGATGAGAGAACCTAGGGGTAGTGACATAGCTGGAACTACTAGTACCCTTCAGGAACAAATACAATGGATGACAAGCAACCCACCTGTCCCAGTGGGAGACATCTATAAAAGATGGATCATCCTAGGATTAAATAAAATAGTAAGAATGTATAGCCCTGTTAGCATTTTGGACATAAGACAAGGGCCAAAGGAACCTTTTAGAGACTATGTGGACAGGTTCTTTAAAACTCTAAGAGCTGAGCAAGCTTCACAGGAAGTAAAGAATTGGATGACAGAAAGCTTGCTGGTGCAAAATTCGAACCCAGACTGTAAGACCATCTTAAAAGCATTAGGACCAGGGGCTACACTAGAAGAAATGATGACAGCATGTCAGGGAGTGGGAGGACCTGGCCATAAGGCAAGGGTTTTGGCTGAGGCCATGAGCCAAGCAACAAATGCAGCTATAATGATGCAGAAAAGTAACTATAAGGGCCCAAGAAGATTTATTAAATGTTTTAATTGTGGCAAAGAAGGACACATAGCCAAAAATTGCAGGGCCCCTAGAAAAAAGGGCTGTTGGAAATGTGGAAAAGAAGGACATCAAATGAAAGACTGCACTGAAAGACAGGCTAATTTTTTAGGGAAAATTTGGCCTTCCAACAAGGGGAGGCCCGGAAATTTTCTTCAGAACAGGCCAGAGCCAACAGCCCCGCCAGCGGAGAGCTTCGGGTTCAAAGAGGAAATAACCCCCTCTCCGAAGCAGGAGCAGAAGGACGAGGGACAGGGACTGTATCCTCCCTTAGCCTCCCTCAAATCACTTTTTGGCAGCGACCCTTAGTCACCATAAGAGTGGGGGGACAGCTAAGGGAAGCTCTATTAGATACAGGAGCAGATGATACAGTATTAGAAGACATAGATTTGCCAGGAAAATGGAAACCAAAAATAATAGGGGGAATTGGAGGTTTTATCAAAGTAAAACAGTATGATCAAATAACCATAGATATTTGTGGACACAAGGCTATAGGTACAGTGTTAGTAGGACCTACACCTGTCAACATAATTGGAAGGAATATGTTGACTCAGATTGGTTGCACTTTAAATTTTCCAATTAGTCCTATTGAAACTGTACCAGTAAAATTGAAGCCAGGAATGGATGGCCCAAAGGTTAAACAATGGCCATTGACAGAGGAAAAAATAAAAGCACTAACAGAAATATGTACAGATATGGAAAAAGAAGGAAAGATTTCAAAAATTGGGCCTGAAAATCCATACAATACTCCAATATTTGCCATAAAGAAAAAAGACAGTACTAAATGGAGAAAATTAGTAGATTTTAGAGAACTTAATAAAAGAACTCAAGATTTTTGGGAAGTTCAATTAGGAATACCACATCCTGCAGGGTTAAAAAAGAAAAAGTCAGTAACAGTACTAGATGTGGGGGATGCATATTTTTCAGTTCCCTTAGATAAGGAGTTCAGGAAGTACACTGCATTCACCATACCTAGTCTCAACAATGAGACACCAGGAATCAGATACCAGTACAATGTGCTTCCACAAGGGTGGAAAGGATCACCAGCAATATTCCAAAGTAGTATGACAAAAATTTTAGAGCCCTTTAGAGCAAAAAATCCAGACATAGTTATCTACCAATACATGGATGATTTGTATGTAGGGTCTGACTTAGAACTAGGGCAGCATAGGATGAAAATAGAGGAGTTAAGGGAACATCTACTGAAATGGGGCTTTACTACACCAGACAAGAAACATCAGAAAGAACCCCCATTCCTTTGGATGGGGTATGAACTCCATCCTGATAAATGGACAGTACAGCCTATACAACTGCCAGAAAAGGACAGCTGGACTGTCAATGATATACAGAAGTTAGTAGGAAAATTAAATTGGGCAAGTCAGATTTATCCAGGGATTAAAATAAAGCAATTATGTAAACTCCTTAGGGGAGCCAAGGCACTAACAGACATAGTGCCACTGACTGAAGAAGCAGAGTTAGAATTGGCAGAGAACAGGGAGATTCTAAAAGAACCGGTACATGGGGTATATTATGACCCATCAAAAGACTTAATAGCAGAACTGCAGAAACAAGGGCAAGGCCAATGGACATATCAAATTTATCAAGAGCCATTTAAAAACCTAAAAACAGGAAAGTATGCAAAAACAAGGTCTGCCCACACTAATGATATAAAAGAATTAACAGATGCAGTGCAAAAGGTAGCTAGGGAATGCATAGTAATATGGGGAAAGAGTCCTAAGTTTAGGCTACCCATACAAAAGGAAACATGGGAGGCATGGTGGACAGATTATTGGCAAGCCACCTGGATTCCTGAATGGGAGTTTGTCAATACCCCCCCTCTAGTAAAACTATGGTATCAGTTAGAAACAGAGCCCATCATAGGAGCAGAAACCTTCTATGTAGATGGGGCATCTAATAGAGAGACCAAAAAAGGAAAAGCAGGATATGTTACTGACAGAGGAAGACAAAAGGCTGTCATCCTAACTGAAACCACAAATCAGAAGGCTGAGTTACAAGCAATTCATTTAGCTTTACAGGATTCAGGATCAGAAGTGAATATAGTAACAGACTCACAGTATGTATTAGGAATTATTCAAGCACAACCAGATAAGAGTGAATCAGAGATAGTCAATAAAATAATAGAGAAATTAATACAAAAGGAAAGGGTCTACCTGTCATGGGTACCAGCACACAAAGGGATTGGAGGAAATGAACAAGTAGATAGATTAGTCAGTGCTGGAATCAGGAAAATACTGTTTTTAGATGGGATAGATAAGGCACAAGAAGAACATGAAAAATATCACAACAACTGGAGAGCAATGGCTAGTGATTTTAATCTGCCACCAGTAGTAGCAAAAGAAATAGTAGCTAGCTGTGATAAATGTCAGCTAAAAGGAGAGGCCATGCATGGACAAGTAGACTGTAGTCCAGGAATATGGCAATTAGATTGTACACATTTAGAAGGAAAAATTATCCTAGTAGCAGTCCATGTAGCTAGTGGATATATAGAAGCAGAAGTCATTCCAGCAGAAACAGGACAGGAAACAGCCTACTTCATACTAAAGTTAGCAGGAAGATGGCCAGTAAAAATAATACATACAGACAATGGTAGCAATTTCACCAGTAGTGCAGTTAAGGCAGCCTGTTGGTGGGCAGGTATACAGCAGGAATTTGGAATTCCCTACAATCCCCAAAGTCAAGGAGTAGTAGAATCCATGAATAAAGAATTAAAGAAAATCATAGGACAAGTAAGAGATCAAGCTGAACATCTTAAGACAGCAGTACAAATGGCGGTATTCATTCACAATTTTAAAAGAAAAGGGGGGATTGGGGGGTACAGTGCAGGGGAAAGAATAATAGACATAATATCAACAGACATACAAACTAGAGAATTACAAAAACAAATTATAAAAATTCAAAATTTCCGGGTTTATTACAGGGACAGCAGAGACCCAGTTTGGAAAGGACCAGCAAAGCTACTCTGGAAAGGTGAAGGGGCAGTAGTCATACAAGACAATAGTGAAATAAAAGTAGTACCAAGAAGAAAAGCAAAGATCATTAGAGATTATGGAAAACAGATGGCAGGTGATGATTGTGTGGCAGGTAGACAGGATGAGGATTAGCACATGGAAAAGTTTAGTAAAATACCATATGCATGTTTCAAAGAAAGCCAAAAATTGGTTTTATAGACATCATTTTCAAAGCAGGCATCCAAAAATAAGTTCAGAAGTACACATCCCACTAGAAGAAGCTAAATTAGTAGTAACAACATATTGGGGTCTGCATACAGGAGAAAGAGATTGGCATCTGGGTCAGGGAGTCTCCATAGAATGGAGGCAGGGACGGTATAGGACACAAATAGATCCTGACCTGGCAGACCAACTGATCCATATATATTATTTTGATTGTTTTTCAGCCTCTGCCATAAGGAAAGCCATCTTAGGACATAGAATTAGCCCTAGGTGTAACTATCAAGCAGGACATAACAAGGTAGGATCCCTACAATATTTGGCACTAACAGCATTAATAGCTCCAAAGAAGACAAAGCCGCCTTTGCCTAGTGTCAAGAAACTAGTAGAAGATAGATGGAACAAGCCCCAGGAGACCAGGGGCCACAGAGGGAGCCATACAATGAATGGACACTAGAGCTTTTAGAGGAGCTTAAGAATGAAGCTATTAGACATTTTCCTAGGCCATGGCTTCATGGATTAGGACAATATATCTATAACACCTATGGGGATACTTGGGAAGGAGTTGAAGCTATAATAAGGATACTGCAACAACTACTGTTTATCCATTTCAGAATTGGGTGCCAACATAGCAGAATAGGCATTATTCGACAGAGAAGAGTAAGAAATGGAACTAGTAGATCCTAACTTAGATCCCTGGAATCAACCAGGAAGCCAGCCTACAACTCCTTGTACCAAATGTTATTGTAAAAAGTGTTGCTTTCATTGCTACTGCTGCTTTGCAACGAAGGGCTTAGGCATCTCCTATGGCAGGAAGAAGCGGAGACAACGACGAAGAACTCCTCAGAGCAGTCAGAGCCATAAAAATCCTATACCAGAGCAGTAAGTATTATAGTATATGTAATGTCCAATCTGTATGTATTATCAATAGTAGCATTTATAATAGCATTAATAATAGCAATAGTTGTGTGGACTATAGTATTTATAGAATATAAGAAATTGTTAAGGCAAAGAAAAATAAATAGGTTATATGAAAGAATAAGAGAAAGAGCAGAAGACAGTGGCAATGAGAGTGAGGGTGATGCAGAGGAACTGGCAGCACTTGGGGAAATGGGGTCTTTTATTTCTGGGGATATTAATAATCTGTAGTGCTGCAGACAACTTGTGGGTTACAGTCTATTATGGGGTACCTGTGTGGAAAGAAGCAACTACTACGTTATTTTGTGCATCAGATGCTAAAGGATATGAAAGAGAAGTGCATAATGTCTGGGCCACACATGCCTGCGTACCCACAGACCCCAACCCACAGGAAATATGGCTGAAAAATGTAACAGAAAATTTTGATATGTGGAAAAATAACATGGTAGAACAAATGCATGAAGATATAATCAGTTTATGGGATCAAAGCCTAAAGCCATGTGTAAAGTTAACTCCACTCTGTGTTACTTTACACTGTAGTGATGTCAATATCACTAGTAATGCCACTACCACTAATGACACCAGCACCCCGGAAGAGTCAGGGGCAATACAAAACTGTTCTTTCAATATGACCACAGAAGTAAAAGACAAGAAGCTGAGAGTAAATGCACTCTTTTATAAACTTGATATAATACCAATCAATAACAGCAGTAGTAGTGACTATAGGCTAATAAATTGTAATACCTCAACCATTAAACAGGCTTGTCCAAAGGTATCTTGGGATCCAATTCCCATACATTATTGTGCTCCAGCTGGTTATGCGATTCTAAAGTGTAGGGATCCAAGGTTCAATGGGACAGGGCCATGCAAGAATGTCAGCACAGTACAATGTACACATGGAATTAGGCCAGTGGTATCAACTCAATTGCTGTTAAATGGCAGCCTGGCAGAAGAAGATATAATAATCAGATCTCAAAATATCTCAGATAATGCAAAAACCATAATAGTACACCTTAATGAAAGTGTACAGATTAATTGTACAAGACCCAACAACAATACAAGAAAAAGTATACATTTAGGACCAGGACAAGCATTCTATGCAACAGGTGATATAATAGGAGATATAAAAAAGGCATATTGTGAAATTAATGGAACACAATGGAGTAAAACTAAAACACAGGTACAAGAAAAGTTACGGGCTCTTTTTAATAAAACAATAAAATTTAACCAATCCTCAGGAGGGGACCTAGAAATTACAATGCATAGTTTTAATTGTAGAGGAGAGTTCTTCTACTGCGATACATCAGGATTGTTTAATGAAAGTGAAAAGTACAATGGCACTATCATTCTCCCATGTAAAATAAAACAAATTATAAACATGTGGCAGGGAGTAGGACAAGCAATGTATTCCGCTCCCATTGCAGGACGCATTAACTGTAACTCAACTATTACAGGCCTACTATTAACAAGAGATGGTGGTCAGAGTAATGATACTAATAGGACTGAGACTTTCAGACCTGAGGGAGGAAACATGAAAGACAATTGGAGAAATGAACTATATAAATATAAAGTAGTAGAAATTGAACCACTAGGAGTAGCACCCACCAAGGCAAGAAGACGAGTGGTGCAGAGAGAAAGAAGAGCAGTGGGAATAGGAGCTCTGTTCCTTAGATTCTTGGGAGCAGCAGGAAGCAACATAGGCGCAGCGTCAATAACGCTGACGGTACAGGCCAGACAATTACTGTCTGGAATAGTGCAGCAGCAAAACAATTTGCTGAGGGCTATTGAAGCGCAACAGCATCTGTTGCAGCTCACAGTCTGGGGCATTAAACAGCTCCAGGCAAGAGTCCTTGCTGTAGAAAGATACCTAAAGGATCAACAGCTCCTAGGGATTTGGGGCTGCTCTGGAAAACTCATCTGCACCACTAACGTGCCTTGGAACACTAGTTGGAGTAATAAATCTCATGATGAGATTTGGAACAACATGACCTGGATGCAGTGGGAAAAAGAGATTAACAATTACTCAAACACAATATACAGGTTAATTGAAGAATCGCAGAACCAACAGGAAAAGAATGAACAAGACTTATTGGCATTGGACAAGTGGGCAAGTCTGTGGAATTGGTTTGACATATCAAACTGGCTATGGTATATAAAAATATTCATAATGATAGTAGGAGGCTTGATAGGTTTAAGAATAGTTTTTACTGTGCTTTCTGTAGTAAATAGAGTTAGGAAGGGATACTCACCTTTGTCATTACAGACCCTTATCCCAAGCCCGAGGGGACCCGACAGGCCCGAAGGAATCGAAGAAGGAGGTGGAGAGCAAGACAGAAACAGATCCGTTCGATTAGTGAACGGATTCTTGTCGCTTGTCTGGGACGACCTGAGGAACCTGTGCCTCTTCAGCTACCGCCACTTGAGAGACTTCATATTAATTGCAGCAAGGACTGTGGACAGGGGACTAACGAGGGGGTGGGAAACCCTCAAATATCTATGGAACCTCGCACAGTATTGGAGTCAGGAACTAAAGAATAGTGCTATTAGCTTGCTTAATACCACAGCAATAGTAGTAGCTGAGGGAACAGATAGAGTTATAGAAGTTTTGCAAAGAGCTGGTAGAGCTGTTCTCAACGTACCTAGAAGGATAAGACAGGGCTTAGAAAGGAGTTTGCTATAAAATGGGTGGTAAGTGGTCAAAAAGTAGTATAGTTGGATGGCCTGCTGTAAGGGAAAGAATGAGAAGGACCCCTCCAGCAGCAGAAGGGGTGGGAGCAGTGTCTCAAGACTTAGATAGGCGAGGGGCAGTTACAAGCAGCAATACTGCAGCTACTAATCCTGACTTGGCCTGGCTGGAAGCACAAGAGGATGAGGAAGTAGGCTTTCCAGTCAGACCTCAGGTACCTTTAAGACCTATGACTTTTAAGGCAGCTGTAGATCTCAGCCACTTTTTAAAAGAAAAGGGGGGACTGGAAGGGTTAATTTACTCCAAGAAAAGACAAGAAATCCTTGATCTGTGGGTTTACCACACACAAGGCTTCTTCCCTGATTGGCAGAACTACACCCCAGGGCCAGGGATTAGATTCCCATTGACTTTTGGATGGTGCTTCAAGCTAGTACCAGTTGATCCAGATGAGGTAGAAAAGGCCAATGAAGGAGAAAACAACTGCTTGCTACACCCAATGAGCCAACATGGAATGGATGATGAAGACAGAGAAGTACTGAGATGGGAGTTTGACAGTCGTCTGGCATTTAGACACATAGCCAGAGAGAAACATCCTGAGTTCTATCAAAACTGATGACACAGGACACAGAGATTGCTGACACAGAAG
>F2.CM.02.02CM_0016BBY_AY371158_G.BE.96.DRCBL_AF084936
[truncated: 88,042 more chars]
