# Supplementary material for: More accurate recombination prediction in HIV-1 using a robust decoding algorithm for HMMs
Source: BMC Bioinformatics. 2011 May 17;12:168. doi: 10.1186/1471-2105-12-168 (PMC3123234; doi:10.1186/1471-2105-12-168)
Supplement: Additional file 1 — Data sets. This file contains sequences and their annotations for the single-breakpoint and short interval data sets. [file 1471-2105-12-168-S1.GZ › datasets/short_150_annotations.txt]

>A1.UG.98.98UG57136_AF484509_A2.CD.97.97CDKS10_AF286241
1	3508	A1
3509	3658	A2
3659	8807	A1

>A1.UG.98.98UG57134_AF484507_B.RU.04.04RU128005_AY682547
1	3111	A1
3112	3261	B
3262	8853	A1

>A1.UG.x.UG031_AB098331_C.TZ.01.BD22_11_AY253321
1	5819	A1
5820	5969	C
5970	9610	A1

>A1.UZ.02.02UZ0672_AY829212_D.UG.99.99UGF03726_AF484519
1	5374	A1
5375	5524	D
5525	8807	A1

>A1.SE.95.SE8538_AF069669_F1.BR.89.BZ126_AY173957
1	5275	A1
5276	5425	F1
5426	8801	A1

>A1.KE.00.KER2008_AF457052_F2.CM.95.MP255_AJ249236
1	1385	A1
1386	1535	F2
1536	8804	A1

>A1.UG.98.98UG57142_AF484512_G.SE.93.SE6165_AF061642
1	7765	A1
7766	7915	G
7916	8852	A1

>A1.KE.00.MSA4070_AF457081_H.CF.90.056_AF005496
1	644	A1
645	794	H
795	8827	A1

>A1.UG.92.92UG_029_AY713407_J.SE.94.SE7022_AF082395
1	2724	A1
2725	2874	J
2875	8245	A1

>A1.UA.00.98UA0116_AF413987_K.CM.96.MP535_AJ249239
1	3645	A1
3646	3795	K
3796	9740	A1

>A2.CY.94.94CY017_41_AF286237_B.NL.00.671_00T36_AY423387
1	5082	A2
5083	5232	B
5233	9060	A2

>A2.CY.94.94CY017_41_AF286237_C.BW.99.99BW393212_AF443083
1	4600	A2
4601	4750	C
4751	9060	A2

>A2.CD.97.97CDKFE4_AF286240_D.UG.99.99UGK09259_AF484498
1	3577	A2
3578	3727	D
3728	5100	A2

>A2.CY.94.94CY017_41_AF286237_F1.BR.93.93BR020_1_AF005494
1	4540	A2
4541	4690	F1
4691	9060	A2

>A2.CY.94.94CY017_41_AF286237_F2.CM.02.02CM_0016BBY_AY371158
1	3586	A2
3587	3736	F2
3737	9060	A2

>A2.CD.97.97CDKTB48_AF286238_G.SE.93.SE6165_AF061642
1	1530	A2
1531	1680	G
1681	8969	A2

>A2.CD.97.97CDKTB48_AF286238_H.CF.90.056_AF005496
1	5293	A2
5294	5443	H
5444	8959	A2

>A2.CD.97.97CDKFE4_AF286240_J.SE.94.SE7022_AF082395
1	3330	A2
3331	3480	J
3481	5100	A2

>A2.CY.94.94CY017_41_AF286237_K.CM.96.MP535_AJ249239
1	5644	A2
5645	5794	K
5795	9063	A2

>B.AU.95.MBCC54_AF042103_C.TZ.01.BD22_11_AY253321
1	6753	B
6754	6903	C
6904	8706	B

>B.CN.02.02HNsq4_DQ007902_D.UG.98.98UG57140_AF484511
1	3862	B
3863	4012	D
4013	8965	B

>B.KR.04.04KMH5_DQ295193_F1.BE.93.VI850_AF077336
1	4447	B
4448	4597	F1
4598	8976	B

>B.CO.01.PCM039_AY561239_F2.CM.97.CM53657_AF377956
1	8254	B
8255	8404	F2
8405	8696	B

>B.AU.x.C24_AF538304_G.ES.99.X138_AF450098
1	887	B
888	1037	G
1038	9450	B

>B.CN.x.CNHN24_AY180905_H.CF.90.056_AF005496
1	6977	B
6978	7127	H
7128	9007	B

>B.AU.x.C42_AF538305_J.SE.94.SE7022_AF082395
1	3917	B
3918	4067	J
4068	9437	B

>B.US.97.ARES2_AB078005_K.CD.97.EQTB11C_AJ249235
1	7106	B
7107	7256	K
7257	9631	B

>C.BW.96.96BW15C02_AF110974_D.KR.04.04KBH8_DQ054367
1	529	C
530	679	D
680	9019	C

>C.ZA.99.99ZACM9_AF411967_F1.BR.89.BZ163_AY173958
1	2466	C
2467	2616	F1
2617	9761	C

>C.ZA.04.04ZAPS205B1_DQ093599_F2.CM.95.MP257_AJ249237
1	1399	C
1400	1549	F2
1550	8443	C

>C.ZA.03.03ZASK213B1_DQ093607_G.ES.99.X138_AF450098
1	1613	C
1614	1763	G
1764	8461	C

>C.BW.00.00BW07621_AF443088_H.BE.93.VI991_AF190127
1	3572	C
3573	3722	H
3723	9047	C

>C.ZA.04.04ZASK217B1_DQ056417_J.SE.94.SE7022_AF082395
1	2064	C
2065	2214	J
2215	8420	C

>C.ZA.03.03ZASK097B1_AY878060_K.CM.96.MP535_AJ249239
1	7754	C
7755	7904	K
7905	8392	C

>D.CD.85.Z2Z6_M22639_F1.FI.93.FIN9363_AF075703
1	1145	D
1146	1295	F1
1296	9075	D

>D.TD.99.MN011_AJ488926_F2.CM.95.MP255_AJ249236
1	3699	D
3700	3849	F2
3850	8829	D

>D.UG.98.98UG57143_AF484514_G.CM.01.01CM_4049HAN_AY371121
1	7831	D
7832	7981	G
7982	8788	D

>D.KE.93.MB2059_AF133821_H.CF.90.056_AF005496
1	3126	D
3127	3276	H
3277	9096	D

>D.UG.94.94UG114_U88824_J.SE.94.SE7022_AF082395
1	7958	D
7959	8108	J
8109	8952	D

>D.UG.99.99UGF03726_AF484519_K.CD.97.EQTB11C_AJ249235
1	4632	D
4633	4782	K
4783	8812	D

>F1.FR.96.MP411_AJ249238_F2.CM.95.MP255_AJ249236
1	2275	F1
2276	2425	F2
2426	8614	F1

>F1.FI.93.FIN9363_AF075703_G.NG.01.01NGPL0669_DQ168576
1	1767	F1
1768	1917	G
1918	8925	F1

>F1.FI.93.FIN9363_AF075703_H.CF.90.056_AF005496
1	8092	F1
8093	8242	H
8243	8923	F1

>F1.BE.93.VI850_AF077336_J.SE.94.SE7022_AF082395
1	8533	F1
8534	8683	J
8684	8897	F1

>F1.FR.96.MP411_AJ249238_K.CD.97.EQTB11C_AJ249235
1	7353	F1
7354	7503	K
7504	8614	F1

>F2.CM.02.02CM_0016BBY_AY371158_G.BE.96.DRCBL_AF084936
1	4182	F2
4183	4332	G
4333	8349	F2

>F2.CM.95.MP257_AJ249237_H.CF.90.056_AF005496
1	3204	F2
3205	3354	H
3355	8589	F2

>F2.CM.02.02CM_0016BBY_AY371158_J.SE.93.SE7887_AF082394
1	6367	F2
6368	6517	J
6518	8349	F2

>F2.CM.02.02CM_0016BBY_AY371158_K.CM.96.MP535_AJ249239
1	1448	F2
1449	1598	K
1599	8349	F2

>G.SE.93.SE6165_AF061642_H.CF.90.056_AF005496
1	1714	G
1715	1864	H
1865	9074	G

>G.NG.92.92NG083_U88826_J.SE.93.SE7887_AF082394
1	8248	G
8249	8398	J
8399	8984	G

>G.KE.93.HH8793_12_1_AF061641_K.CD.97.EQTB11C_AJ249235
1	551	G
552	701	K
702	9035	G

>H.BE.93.VI997_AF190128_J.SE.94.SE7022_AF082395
1	7195	H
7196	7345	J
7346	8955	H

>H.BE.93.VI997_AF190128_K.CM.96.MP535_AJ249239
1	6463	H
6464	6613	K
6614	8955	H

>J.SE.93.SE7887_AF082394_K.CM.96.MP535_AJ249239
1	3996	J
3997	4146	K
4147	8943	J
