# Supplementary material for: More accurate recombination prediction in HIV-1 using a robust decoding algorithm for HMMs
Source: BMC Bioinformatics. 2011 May 17;12:168. doi: 10.1186/1471-2105-12-168 (PMC3123234; doi:10.1186/1471-2105-12-168)
Supplement: Additional file 1 — Data sets. This file contains sequences and their annotations for the single-breakpoint and short interval data sets. [file 1471-2105-12-168-S1.GZ › datasets/short_200.fas]

>A1.KE.97.ML752_AY322193_A2.CD.97.97CDKS10_AF286241
TGCCTTGAGTGCTTCAAGTAGTGTGTGCCCATTTGTTGTAAGACTCTGGTAACTAGAGATCCCTCAGACCACTCTAGACGGTGTAAAAATCTCTAGCAGTGGCGCCCGAACAGGGACTTGAAAGCGAAAGTTCCAGAGAGGTTCTCTCGACGCAGGACTCGGCTTGCTGAGGTGCACACAGCAAGAGGCGAGAGCGGCGACTGGTGAGTACGCCATTTTTTGACTAGCGGAGGCTAGAAGGAGAGAGATGGGTGCGAGAGCGTCAGTATTAAGTGGGGGAAAATTAGATGCATGGGAGAAAATTCGGTTAAGGCCAGGGGGAAAGAAAAAATATAGAATGAAACATTTAGTATGGGCAAGCAGGGAGCTGGAAAGATTCGCACTTAACCCTGGCCTTTTAGAAACAACAGAAGGGTGTCAACAAATAATGGAACAGTTACAATCAGCTCTCAATACAGGAACAGAAGAACTGAGATCATTATATAATACAGTAGCAACCCTCTATTGCGTACATCAACGGATAGATGTAAAAGACACCAAGGAAGCTCTAGATAAAATAGAGGAAATACGAAATAAGAGCAAGCAAAAGACACAACAGGCAGCAGCAGCTGACACAGGAAACAGCAGCAAAGTCAGCCAAAATTACCCTATAGTGCAAAATGCACAAGGGCAAATGACACATCAGAACTTGTCACCTAGGACTTTAAATGCATGGGTGAAAGTAATAGAAGAAAAGGCTTTCAGCCCAGAAGTAATACCCATGTTCTCAGCATTATCAGAAGGAGCCACCCCACAAGATTTAAATGTGATGCTGAACATAGTGGGGGGACACCAGGCAGCTATGCAAATGTTAAAAGACACCATCAATGAAGAAGCTGCAGAATGGGACAGGTTACATCCAGTACATGCAGGGCCTATTCCACCAGGCCAGATGAGAGAACCGAGGGGAAGTGACATAGCAGGAACTACTAGTACCCCTCAAGAACAATTACAATGGATGACAAGCAACCCACCTATCCCAGTGGGAGACATCTATAAAAGATGGATAATCCTGGGATTAAATAAAATAGTAAGAATGTATAGCCCTGTTAGCATTTTAGATATAAAACAAGGGCCAAAAGAACCCTTCAGAGACTATGTAGATAGGTTCTTTAAAACTCTCAGAGCTGAGCAAGCTACACAGGAGGTAAAAGGATGGATGACAGAAACATTACTGGTCCAAAATGCAAACCCAGACTGTAAGTCCATTTTAAAAGCATTAGGAACAGGGGCTTCATTAGAAGAAATGATGACAGCATGCCAGGGAGTGGGAGGACCCGGCCATAAAGCAAGGGTTTTAGCTGAGGCAATGAGTCAAGTACAACAGACAAACATAATGATGCAGAGAGGCAATTTTAGGGGCCAAAAAAGGATTAAGTGTTTTAATTGTGGCAAAGAAGGACACCTAGCCAGAAATTGCAAGGCCCCTAGGAAAAAGGGCTGTTGGAAATGTGGGAAGGAGGGACACCAAATGAAAGATTGCACTGAAAGACAGGCTAATTTTTTAGGGAAAATCTGGCCTTCCAGCAAGGGGAGGCCAGGGAACTTTCCTCAGAACAGACTGGAGCCAACAGCTCCACCAGCAGAGATCTTTGGGATGGGGGAAGAGATAACCTCCCCTCCGAAGCAGGAGCAGAAAGACAGGGAACAGGCCCCACCCTTAGTTTCCCTCAAATCACTCTTTGGCAACGACCCCTTGTCACAGTAAAAATAGGAGGACAGCTAAAAGAAGCTCTATTAGATACAGGAGCAGATGATACAGTATTAGAAGACATAAATTTGCCAGGAAAATGGAAACCAAAAATGATAGGGGGAATTGGAGGTTTCATTAAGGTAAAACAGTATGATCAGATATCTATAGAAATTTGTGGGAAAAAAGCTATAGGTACAGTATTAGTAGGACCTACACCTGTCAACATAATTGGGAGAAATATGTTGACCCAGATTGGTTGTACTTTAAATTTCCCAATTAGTCCTATTGAGACTGTACCAGTAAAATTAAAGCCAGGAATGGATGGCCCAAAGGTTAAACAATGGCCATTGACAGAAGAAAAAATAAAAGCATTAACAGAAATTTGTACAGAAATGGAAAAGGAAGGAAAAATTTCAAAAATTGGGCCCGAAAACCCATACAATACTCCAATCTTTGCTATAAAGAAAAAAGACAGCACTAAATGGAGGAAATTAGTAGATTTCAGAGAACTCAATAAAAGAACTCAAGACTTTTGGGAAGTTCAATTAGGAATACCGCATCCAGCGGGCCTAAAGAAGAAAAAATCAGTAACAGTACTGGATGTGGGGGACGCATATTTTTCAGTTCCTTTGGATGAAGGCTTTAGAAAGTACACTGCGTTCACCATACCTAGTACAAACAATGAGACACCAGGAATCAGGTATCAGTACAATGTGCTTCCACAGGGATGGAAAGGATCACCGGCAATATTCCAGAGTAGCATGACAAAAATCTTAGAGCCCTTTAGATCAAAAAATCCAGAAATAATTATCTATCAATACATGGATGACTTGTATGTGGGCTCTGATTTAGAAATAGGGCAGCATAGAGCAAAAATAGAAGAGCTGAGAGCTCATCTATTGAGCTGGGGATTTACTACCCCAGACAAAAAGCATCAGAAAGAACCGCCATTTCTTTGGATGGGATATGAACTCCACCCTGACAAGTGGACAGTCCAGCCTATAATGCTGCCAGAAAAAGAAAGCTGGACTGTCAATGATATACAGAAGTTAGTGGGGAAACTAAATTGGGCAAGTCAAATTTATGCAGGAATTAAAGTAAAGCAACTGTGTAAACTCCTCAGGGGAGCCAAAGCACTAACAGATATAGTACCACTGACTGAGGAGGCAGAATTAGAATTGGCAGAGAACAGGGAGATTCTAAAAGACCCTGTGCATGGAGTATACTATGACCCATCAAAAGACTTAATAGCAGAAATACAGAAACAAGGGCAAGACCAATGGACATACCAAATCTATCAAGAGCCATTTAAAAATCTAAAAACAGGAAAATATGCAAGAAAAAGGTCTGCTCACACTAATGATGTAAAACAGTTAACAGAAGTAGTGCAAAAAGTGGTCATGGAAAGCATAGTAATATGGGGAAAGACTCCTAAATTTAAACTACCCATACAAAAAGAAACATGGGAGACATGGTGGATGGACTATTGGCAGGCTACCTGGATTCCTGAATGGGAGTTTGTCAATACCCCTCCCCTAGTAAAATTATGGTACCAGTTAGAGAAAGACCCCATAGCAGGAGCAGAGACTTTCTATGTAGACGGGGCAGCCAATAGGGAGACTAAGCTAGGAAAAGCAGGGTATGTCACTGACAGAGGAAGACAAAAGGTTATTTCCCTAACTGAGACAACAAATCAAAAGACTGAATTACATGCAATCCATTTAGCCTTGCAGGATTCAGGGTCAGAAGTAAACATAGTAACAGACTCACAGTTTGCATTAGGAATCATTCAGGCACAACCAGACAGGAGTGAATCAGAGTTAGTCAATCAAATAATAGAGAAGCTAATAGGAAAGGACAAAGTCTACCTGGCATGGGTACCAGCACACAAAGGAATTGGAGGGAATGAACAAGTAGATAAATTAGTCAGTTCTGGAATCAGGAAGGTGCTGTTTTTAGATGGGATAGATAAAGCTCAAGAAGAACATGAAAGGTATCACAGCAATTGGAGGACAATGGCTAGTGATTTTAATCTGCCACCTATAGTAGCAAAGGAAATAGTAGCCAGCTGTGATAAATGTCAACTAAAAGGAGAAGCCATGCATGGACAAGTAGATTGTAGTCCAGGGATGTGGCAATTAGATTGCACACATCTAGAAGGAAAAGTAATTCTAGTAGCAGTCCATGTAGCCAGTGGCTATATAGAAGCAGAAGTTATCCCAGCAGAAACAGGACAGGAGGCAGCATACTTTCTGCTAAAATTAGCAGGAAGATGGCCAGTAAAAGTAGTACACACAGATAATGGCAGCAATTTCACCAGCGCTGCATTTAAAGCAGCCTGTTGGTGGGCAAATATCCAACAGGAATTTGGGATTCCCTACAATCCCCAAAGTCAAGGAGTGGTGGAATCTATGAATAAGGAATTAAAGAAAATCATAGGACAGGTAAGAGAGCAAGCTGAACATCTTAAAACAGCAGTACAAATGGCAGTATTCATTCACAATTTTAAAAGAAAAGGGGGGATTGGGGGGTACAGTGCAGGGGAAAGAATAATAGACATAATAGCAACAGACATACAAACTAAAGAATTACAAAAACATATTACAAAAATTCAAAATTTTCGGGTTTATTACAGGGACAGCAGAGATCCAATTTGGAAAGGACCAGCAAAACTACTCTGGAAAGGTGAAGGGGCAGTAGTAATACAGGACAATAGTGATATAAAGGTAGTACCAAGAAGAAAAGCAAAGATCATTAGGGATTATGGAAAACAGATGGCAGGTGATGATTGTGTGGCAAGTAGACAGGATGAGGATTAGAAAATGGCACAGTTTAGTAAAATATCATATGTATGTCTCAAAGAAAGCTAAAGATTGGTTTTATAGACATCACTTTGAAAGCAGGCATCCAAAAGTAAGTTCAGAAGTACACATCCCACTAGGGGATGCTAGATTAGTAGTAAGAACATATTGGGGTCTGCATACAGGAGAAAAAGATTGGCATTTGGGTCATGGGGTCTCCATAGAATGGAGGCTAAGAAGATATAGCACACAAATAGATCCTGACCTGGCAGACCAACTAATTCATCTGCATTATTTTAACTGTTTTTCAGACTCTGCCATAAGGAAAGCCATATTAGGACAAGTAGTTAGCCCTAGTTGTGAATATCAAGCAGGACATAACAAGGTAGGATCTCTACAATATTTGGCACTAAAAGCATTAGTAACACCAAAAAAGATAAGGCCACCTTTGCCTAGTGTTGGGAAATTAGCTGAGGACAGATGGAACAAGCCCCAGAAGACCAGGGGCCCCAGAGGGAGCCATACAATGAATGGACATTAGAACTGTTAGAAGAGCTAAAGCATGAAGCTGTTAGACATTTTCCTAGACCATGGCTCCATGGATTAGGACAACATATCTATAATACCTATGGGGATACTTGGGAAGGAGTTGAAGCTATAATCAGAACTTTGCAACAATTACTGTTTGTCCATTTCAGAATTGGGTGCCAACATAGTAGAATAGGCATTATGCGAAGGAGAAGAGTCAGGGATGGATCCGGTAGATCCTAACCTAGAGCCCTGGAACCATCCGGGAAGTCAGCCTACAACTGCTTGTAGCAAGTGTTACTGCAAAGTGTGTTGCTATCATTGTCCAGTTTGCTTTCTGAACAAAGGCTTAGGCATCTCCTATGGCAGGAAGAAGCGGAAACAGCGACGAGGAACTCCTCAACGCAATAAGGATCATCAAAATTCTGTACCAAAGCAGTAAGTATTAGTAGTTAGTATATGTAATGACACCTTTGGAAATCTGTGCAATAGTAGGACTGGTAGTGGCGCTAATCCTAGCAATAGTTGTGTGGACTATAGTAGGTCTAGAATATAAGAAAGTGCTAAAGCAAAGAAAAATAGACAGGTTAATTGAGAGAATAAGAGAAAGAGCAGAAGACAGTGGCAATGAGAGTGAAGGGGATACAGAGGAACTCTCATTGCTTATTGAGATGGGGCATTATGATCTTGGGAATGATAATAATCTGTAGTACTGCAGAAAACTTGTGGGTTACTGTTTACTATGGGGTGCCTGTGTGGAAAGACGCAGAGACCACCCTATTTTGTGCATCAGATGCTAAAGCATATGATACAGAAGTGCATAATATCTGGGCCACACATGCTTGTGTACCTACAGACCCCGACCCACAAGAAATAAATTTGGAAAATGTGACAGAAGAGTTTAACATGTGGAAAAATAACATGGTAGAGCAGATGCATACAGATATAATCAGTCTATGGGACCAAGGCCTAAAGCCATGTGTAAAGTTAACCCCTCTCTGCGTTACTTTAGATTGTAGCTATAATGTCACTACCAATGTCTCCAATGACATGCAAGGAGAAATAAAAAACTGCTCTTTCAATGTGACCACAGTATTAAGGGATAGGAAACAGCAAGTATATTCACTTTTTTATAGACTTGATGTAGTACCAATGAGTAATGATAGTCAGTACAGATTAATAAATTGTAACACCTCAGCCATTACACAGGCTTGTCCAAAGGTAACCTTTGAGCCAATTCCCATACATTATTGTGCCCCAGCTGGTTTTGCGATCCTAAAGTGTAAGGATAAGGATTTCAATGGAGCAGGGCTATGCAAGAATGTCAGCACAGTACAATGCACACATGGAATCAAGCCAGTAGTATCAACTCAACTGCTGTTAAATGGCAGTCTAGCAGAAGGAAATATAACAATTAGATCTGAAAATATCACAGACAATGGCAAAAACATTATAGTACAATTTACCAGCCCTGTAAAAATTAATTGTACCAGACCTAACAACAATACAAGGAAAAGTGTACATATAGGACCAGGACAAGCATTCTATGCAACAGGTGACATAATAGGGAATATAAGAAAAGCACATTGTGATGTTAATAGAACAGAATGGAATAAAACTTTGCAAGAGGTAGCCAAACAATTAGCAACATACTTTGAGAACAAAACAATAATCTTTACTAACTCCTCAGGAGGGGATCTAGAAGTTACAACTCATAGTTTTAATTGTGGAGGAGAATTTTTCTATTGTAACACATCAAGCCTATTTAATGGCACTTGGACGGGCAATGACAGCAGGCAGGAGTCAAATAGCAGCGACACTATAACTCTTCCATGCAGAATAAAACAAATTATAAATATGTGGCAGAGGGTAGGACAAGCAATATATGCCCCTCCCCTACAAGGAGTAATCAGATGTGATTCAAATATTACAGGACTAATCTTAACAAGAGATGGTGGGAGTCCGGATAATGAAACCTTCAGACCTGTTGGAGGAGATATGAGGGACAATTGGAGAAGTGAATTATATAAGTATAAAGTAGTAAAAATTGAACCATTAGGAGTAGCACCCACCAGGGCAAAGAGAAGAGTGGTGGAGAGAGAAAAAAGAGCAGTTGGAATAGGAGCTGTCCTCATTGGGTTCTTAGGAGCAGCAGGAAGCACTATGGGCGCGGCGTCAATAACGCTGACGGTACAGGCCAGACAATTATTGTCTGGCATAGTGCAACAGCAAAGCAATTTGCTGAGGGCTATAGAGGCTCAACAGCATCTGTTGAAACTCACGGTCTGGGGCATTAAACAGCTCCAGGCAAGAGTCCTGGCTGTGGAAAGATACCTAAAGGATCAACAGCTCCTAGGAATTTGGGGCTGCTCTGGAAAACTCATCTGCACCACTAATGTCCCTTGGAACTCTAGTTGGAGTAATAAATCCCTGACTGAGATATGGGACAATATGACCTGGCTACAATGGGATAAAGAAATTAGCAATTACACACAGCAAATATATGATCTAATTGAAAAATCGCAGAACCAGCAGGAAAAAAATGAACAAGACTTATTAGCATTGGACAAGTGGACAAATCTGTGGAATTGGTTTGACATATCAAACTGGCTGTGGTATATAAAGATATTTATAATAATAGTAGGAGGCTTAATAGGATTAAGAATAGTTTTTGCAGTGCTTTCTGTAATAAATAGAGTTAGGCAGGGATACTCACCTTTGTCATTCCAGACCCATACCCCAAACCCAAGGGATCTCGACAGGCTCGGAAGAATCGAAGAAGAAGGTGGAGAGCAAGACAGAATCAGATCGATTCGATTAGTGAGCGGATTCTTAGCACTTGCCTGGGACGATCTACGGAGCCTGTGCCTTTGCAGCTACCACCGATTGAGAGACTTCATCTTGATTGCCGCGAGGACTGTGGAACTTCTGGGACACAGCAGTCTCAAGGGGTTGAGACGGGGGTGGGAAAGCCTCAAGTATCTGGGGAATCTCCTGGTATATTGGGGTCGGGAACTAAAAATTAGTGCTATTAGTTTGCTTGATACCATAGCAATAGAAGTAGCTGGCTGGACAGATAGGGTTATAGAACTAGGACAAGGACTTTGTAGAGCTATTTTACACATACCTAGAAGAATCAGACAGGGCTTAGAAAGGGCTTTGCTATAACATGGGGGGCAAGTGGTCAAAAAGTAGCATAGTGGGATGGCCTGAGGTTAGAGAAAGAATAAGACAAGCTCCAGCAGCAGCAAAAGGAGTAGGAGCAGTATCTCAAGATTTAACTACACATGGAGCAGTCACAATTGGTAATACAGCAGCCTATAATCCTGATAGCGCCTGGGTAGAAGCGCAAGAAGAGGAGGAGGAAGTAGGCTTCCCAGTCAAGCCACAGGTACCTGTAAGACCAATGACCTTCAAGGGAGCTTTTGATCTCAGCCACTTTTTAAAAGAAAAGGGGGGACTGGATGGGTTAATTTACTCCAGGAAGAGGCAAGAGATCCTTGATCTGTGGGTAAACAACACACAAGGCTTCTTCCCTGATTGGCAGAATTACACACCAGGGCCAGGGATCAGGTTCCCACTAACATTTGGATGGTGCTTCAAGCTAGTACCAGTTGATCCAGAAGAAGTAGAGAAGGCTACTGAGGGAGAGAACAACAGCCTATTACACCCTATATGCCAACATGGAATGGATGATGAGGAGGGAGAAACATTAATGTGGAAGTTTGACAGCAAGCTGGCATTAAAACATCTAGCCCAGGAGAAGCATCCGGAGTACTTCAAAGACTGCTGACACAGACTGCGTAGACATAGAAGTTGCTGACTGGGACTTTCCGCTGGGGACTTTCCAGGGGAGGTGTGGTTTGGGCGGAGTTGGGGAGTGGCTAACCCTCAGATGCTGCATATAAGCAGCTGCTTTTTGCTTGTACTGGGTCTCTCTTGGTAGACCAGATCGAGCCTGGGAGCTCTCTGGCTAGCGAGGGAACCCACTGCTTAAGCCTCAATAAAGCTTGCCTTGAGTGCTTCAAGA
>A1.UZ.02.02UZ740_AY829208_B.UY.01.01UYTRA1092_AY781126
GCGAGAGCGTCAGTATTAAGCGGGGGAAAATTAGATGCATGGGAAAAAATTCGGTTAAGGCCAGGGGGAAAGAAAAAATATAGAATAAAACACCTAGTATGGGCAAGCAGGGAGCTGGAAAGATTCGCGCTTAACCCTAGCCTTTTAGAAACATCAGAAGGATGTCAACAAATACTGGAACAGTTACAACCAACTCTCAAGACAGGATCAGAAGAACTTAAATCATTATATAATACAGTAGCAACCCTCTATTGTGTACATCAACGGATAGAGATAAAAGACACCAAGGAAGCTTTAGATAAAATAGAGGAAATACAAAATAAGAGTAAGCAAAAGACCCAACAGGCAGCAACTGTCACAGGAAGCAGCAGCAAGGTCAGTCAAAATTACCCCATAGTGCAAAATGCACAAGGGCAAATGACACACCAGTCCATGTCACCTAGGACTTTGAATGCATGGGTGAAAGTAATAGAAGAAAAGGCTTTTAGCCCAGAAGTAATACCCATGTTTTCAGCATTATCAGAGGGAGCCACCCCACAAGATTTAAACATGATGCTGAACATAGTGGGGGGACACCAGGCAGCTATGCAAATGTTGAAAGATACCATCAATGAGGAAGCTGCTGAATGGGATAGGTTACATCCAGCACAGGCAGGGCCTTTTCCACCAGGGCAGATGAGAGAACCAAGGGGAAGTGACATAGCAGGAACTACTAGTACCCTTCAAGAACAAATAGGATGGATGACAAGCAACCCACCTATCCCAGTGGGAGACATCTATAAAAGATGGATAATCCTAGGATTAAATAAAATAGTACGAATGTATAGCCCTGTTAGCATTTTAGACATAAGACAAGGGCCAAAAGAACCCTTCAGAGACTATGTAGATAGGTTCTTTAAAACTCTTAGAGCTGAGCAAGCTACACAGGATGTAAAGAACTGGATGACAGAAACCCTGCTGGTCCAAAATGCAAATCCAGATTGTAAAACTATTTTAAGAGCATTAGGATCAGGGGCTACATTAGAAGAAATGATGACAGCATGCCAGGGAGTGGGAGGACCCGGCCATAAAGCAAGGGTTTTGGCCGAGGCAATGAGTCAAGTACAAAATGCAAACATAATGATGCAGAAAAGTAATTTTAGGGGCCCAAAAAGAATTAAGTGTTTCAACTGTGGCAAAGAAGGACACCTAGCCAGAAATTGCAGGGCCCCTAGGAAAAAGGGCTGTTGGAAATGTGGAAAGGAAGGCCATCAAATGAAAGACTGCACTGAGAGACAGGCTAATTTTTTAGGGAGAATTTGGCCTTCCAGCAAAGGGAGGCCAGGGAATTTTCCTCAGAGCAGACCAGAACCATCAGCCCCACCAGCAGAAAACTTTGGGATGGGGGAAGAGATAACCCCCTCCCTGAAACAGGAACAGAAAGACAGGGAACAACGTCCTCCTTCAATTTCCCTCAAATCACTCTTTGGCAACGACCCCTTGTCACAGTAAGGATAGGGGGGCAACTAAAGGAAGCTCTATTAGATACAGGAGCAGATGATACAGTTTTAGAAGAAATAAATTTGCCAGGAAGATGGAAACCAAAAATGATAGGGGGAATTGGAGGTTTTATCAAAGTAAGACAGTATGATCAGATACTCATAGAAATATGTGGACATAAAGCTATAGGTACAGTATTAGTAGGACCTACACCTGTCAACATAATTGGAAGAAATATGTTGACTCAGCTTGGTTGTACTTTAAATTTTCCAATAAGTCCTATTGAAACTGTACCAGTAACATTAAAGCCAGGAATGGATGGCCCAAAGGTTAAACAATGGCCATTAACAGAAGAGAAAATAAAAGCATTAATAGACATTTGTAAGGAGATGGAGAAGGAAGGAAAAATTTCAAAAATTGGGCCTGAAAATCCATACAATACTCCAATATTTGTTATAAAGAAAAAAGATAGCACTAAGTGGAGGAAATTAGTAGATTTCAGGGAGCTCAATAAAAGAACTCAGGACTTTTGGGAAGTTCAATTAGGAATACCCCATCCAGCGGGTTTAAAAAAGAAAAAATCAGTAACAGTACTAGATGTGGGGGATGCATATTTTTCAGTTCCTTTAGATGAAAGCTTCAGAAAGTATACTGCATTCACCATACCAAGTATAAACAATGAGACACCAGGGATCAGATATCAGTACAATGTACTCCCACAGGGATGGAAAGGATCACCATCAATATTCCAGAGTAGCATGACAAAAATCTTAGAGCCATTTAGATTAAAAAATCCAGAAATAGTTATTTATCAATACATGGATGACTTGTATGTAGGCTCTGATTTAGAAATAGGGCAACATAGAACAAAAATAGAGGAGTTAAGAGCTCATCTATTGAGCTGGGGATTTACTACACCAGACAAAAAGCATCAGAAAGAACCTCCATTTCTTTGGATGGGATATGAACTCCATCCTGACAAATGGACAGTCCAGCCTATAATGCTACCAGATAAAGACAGCTGGACTGTCAATGATATACAGAAATTAGTGGGAAAACTAAATTGGGCAAGTCAGATTTATCCAGGGATTAAAGTAAGGCAATTATGTAAACTCCTCAGGGGAGCCAAAGCACTGACAGATATAGTGACAATGACTGAGGAAGCAGAATTAGAATTGGCAGAGAACAGAGAGATTCTAAAAGAACCGGTGCATGGAGTATATTATGACCCATCAAAAGATTTAGTAGCAGAAATACAGAAACAAGGACAAGACCAATGGACATATCAAATTTATCAGGAGCCATTTAAAAATCTAAAAACAGGAAAATATGCAAAAAAGGGGTCTGCTCACACTAATGATGTAAAACAATTAACAGCAGTGGTGCAAAAAGTGGCCACAGAAAGCATAATAATATGGGGAAAGACTCCTAAATTTAGACTACCCATACAAAAAGAAACATGGGAAGCATGGTGGATGGAGTACTGGCAGGCTACCTGGATTCCTGAATGGGAGTTTGTCAATACCCCTCCTCTAGTAAAACTATGGTACCAGTTGGAGAAAGAACCCATAGTAGGAGCAGAGACTTTCTATGTAGATGGGGCAGCTAACAGGGAGACTAAGATAGGAAAAGCAGGGTATGTTACTGACAGAGGAAGACAAAAGGTTGTTCCTCTAACTGAGACAACAAATCAAAAGACTGAATTACATGCAATCCATCTAGCTTTGCAGGATTCAGGATCAGAAGTAAATATAGTAACAGACTCACAATATGCATTAGGAATTATTCAGGCACAACCAGACAGGAGTGAATCAGGGATAGTCAATAACATAATAGAGAAACTAATAGAAAAAGAAAGAGTCTACCTGTCATGGGTACCCGCGCACAAGGGGATTGGAGGAAATAAACAAGTAGATAAATTAGTCAGTAATGGAATCAGGAGGGTGTTATTTTTAGAAGGGATAGATAAGGCTCAAGAAGAACATGAAAAATATCACAGCAATTGGAAAGCAATGGCTAGTGATTTTAATCTGCCACCTATAGTAGCAAAGGAAATAGTAGCCAGCTGTGATAAATGTCAATTAAAAGGGGAAGCTATGCATGGACAGGTAGACTGTAGTCCAGGGATATGGCAATTAGATTGCACACATCTAGAAGGAAAAGTAATCATGGTAGCAGTCCATGTAGCCAGTGGCTATATAGAAGCAGAAGTTATCCCAGCAGAAACAGGACAGGAGACAGCATACTTTCTGCTAAAATTAGCAGGAAGATGGCCAGTAAAAGTAGTACACACAGATAATGGCCCCAATTTCACCAGCAGTGCAGTTAAGGCTGCCTGTTGGTGGGCAAATATCCAACAGGAATTTGGGATTCCCTACAATCCCCAAAGTCAAGGAGTAGTGGAGTCTATGAATAAGGAATTAAAGAAAACCATAGGGCAGGTAAGAGAGCAAGCTGAACACCTTAAGACAGCAGTACAAATGGCAGTATTCATTCACAATTTTAAAAGAAAAGGGGGGATTGGGGGGTACAGTGCAGGGGAAAGAATAATAGACATAATAGCAACAGACATACAAACTAAAGAATTACAAAAACAAATTATAAAAATTCAAAATTTTCGGGTTTATTACAGAGACAGCAGAGATCCAATTTGGAAAGGACCAGCAAAACTACTCTGGAAAGGTGAAGGGGCAGTGGTAATACAGGACAATAACGATATAAAAGTAGTACCAAGAAGAAAAGCAAAGATCATTAGGGATTATGGAAAACAGATGGCAGGTGATGATTGTGTGGCAAGTAGACAGGATGAGGATTAGAACATGGAACAGTTTAGTAAAACATCATATGTATGTCTCAAAGAAAGCTAGAAAGTGGTTTTATAGACATCACTATGAAAGCAGAAATCCAAGAGTAAGTTCAGGAGTACACATCCCACTAGGGAATGCTAGGCTAGTAGTAAAAACATATTGGGGTCTGCATACAGGAGAAAAAGACTGGCACTTGGGTCATGGGGTCTCCATAGAATGGAGACAGGAAAGGTATAGCACACAAATAGACCCTGACCTGGCGGACCAACTAATTCATCTGTATTATTTTGACTGTTTTTCAGAATCTGCCATAAGGAAAGCCATAGTAGGACACATAGTTAGCCCTAGGTGTAACTATCCAGCAGGACACAACAAGGTAGGATCTCTACAATACTTGGCACTGAAAGCATTAGTAACACCAACAAGGGAAAGGCCACCTTTGCCTAGTGTTAGGAAACTAACAGAGGATAGATGGAACAAGCCCCAGAAGACCAGGGGCCGCAGAGGGAACCACACAATGAATGGATGTTAGAACTGTTAGAAGATCTTAAGCATGAAGCTGTCAGACATTTTCCAAGGCAGTGGCTCCATGGATTAGGACAACATATCTATAACACCTATGGGGATACTTGGGAAGGGGTTGAAGCTATAATAAGAACTTTGCAACAACTACTGTTTGTTCATTTCAGAATTGGGTGCCAACATAGCAGAATAGGCATTTTGCAAAGGAGAAGAGTCAGGAATGGATCCAGTAGATCCTAACCTAGAGCCCTGGAATCATCCGGGAAGTCAGCCTAAAACTGCTTGTAGCAATTGTTACTGTAAAAAGTGTTGCTGGCATTGCCAAGTTTGCTTTCTAAAAAAAGGCTTAGGCATCTCCTATGGCAGGAAGAAGCGGAGACACAGACGAGGAACTCCTCACAGCAGTAAGGATCATCAAAATCTTATATCAAAGCAGTAAGTACTAAATAAATGTAATGACACCTTTAGAAATCTATGCAATAGTAGCATTAGTAGTAGTGTTTGTCATAGCAGTAGTTGTGTGGACTATAGTAGGTATAGAATATAGGAAATTACTAAAACAAAGAAAAATAGACAGGTTAATTGAGAGAATAAGAGAAAGAGCAGAAGATAGTGGCAATGAAAGCGAGGGGGATGAAGAGGAATTATCAACACTTATGGAGGTGGGGAACCATGCTCTTTTGGATGATAATAATGTGTAAGGCTGCAGGAAACTTGTGGGTCACGGTATACTATGGGGTACCTGTGTGGAGAGATGCAGAGACCACCCTATTTTGTGCATCAGATGCTAAAGCATATGATAAAGAAGTACACAATGTCTGGGCTACACATGCCTGTGTACCCACAGACCCTGACCCACAAGAAATGGCTTTGGAAAATGTGACAGAAAAATTTGACATGTGGAAAAATAACATGGTAGAACAAATGCAAACAGATATAATCAGTCTCTGGGACCAAAGCCTACAGCCATGTGTAAAGTTAACCCCTCTCTGCGTTACTTTAAATTGTACTGAACCCAACAGCACTAGCTCTAACAACAGTAGCGTTAACAGCAACAGCAGCGATATGAAAAACTGCACTTTCAACATGACCACAGAACTAAGAGATAAAAGGAAAACTGTACATTCGCTTTTTTATAAACTTGATATAGTATCAACTGATAGTAATGGTAGTGGGCAGTATAGACTAATAAATTGCAATACATCAACCATGACACAGGCCTGTCCTAAGGTAACCTTTGAGCCAATTCCTATACATTATTGTACCCCAGCTGGTTTTGCGATTCTAAAGTGCAAGGATACAAATTTTACTGGAACAGGGCCATGCAAGAATGTCAGCACAGTACAATGCACACATGGAATCAAGCCAGTAGTATCAACTCAACTGCTGTTAAATGGCAGTCTAGCAGAGAAAGAGGTAATGCTTAGATCTGAAAATATCACAGACAATGGCAAAATCATAATAGTACAGCTTACTGAGCCTGTAAACATCACTTGTATCAGACCTGGCAACAATACAAGAACAAGTATACGTATAGGACCAGGACAAACCTTCTATGCAACAGGTGCTGTAATAGGGGACATAAGAAAAGCATATTGTAATGTCAGCAGGGCAGCATGGAATAACACTTTACAAAAGATAAGTACACAATTAAGAAAATACTTTAATAACAAAACAATAATCTTTAAGAACTCCTCAGGAGGGGATTTAGAAGTTACAACACATAGTTTCAATTGTGGAGGAGAATTTTTCTATTGCAATACAACAGACCTGTTCAATAGCACTTGGGACAATGTCACAAATGTCACAAATGGCGCAAGGGCCAATGAAACTATAACTTTACCATGCAGAATAAAGCAAATTATAAATATGTGGCAGAGAGTAGGACAAGCAATGTATGCCCCTCCTATCAAAGGAAGTATAAGGTGTGAATCAAACATTACAGGACTACTACTAATAAGAGATGGTGGAGGTGGAACTAATAGCAGCAATGAGACCTTCAGACCTATAGGAGGAAATATGAAGGACAATTGGAGAAGTGAACTATATAAGTATAAAGTAGTAAAAATTGAACCAATAGGAGTAGCACCTACCAGGGCAAAGAGAAGAGTGGTGGAGAGAGAAAAAAGAGCAATTGGATTGGGAGCTGCCTTCCTTGGGTTCTTAGGAGCAGCAGGAAGTACTATGGGCGCGGCGTCAATGACGCTGACGGTACAGGCCAGACAATTGTTGTCTGGCATAGTGCAACAGCAAAGCAATTTGCTGAGGGCTATAGAGGCTCAGCAGCATCTGCTGAAACTCACGGTCTGGGGCATTAAACAGCTCCAGGCAAGAGTCCTGGCTGTGGAAAGATACCTAAAGGATCAGCAGCTCCTAGGAATTTGGGGTTGCTCTGGAAAACTCATCTGCACCACTAATGTGCCCTGGAACTCTAGTTGGAGTAACAAATCTCAGAGTGAGATATGGGATAACATGACCTGGATGCAATGGGACAAGGAAGTTATCAATTACACAGACATAATATATGATCTAATTGAAAAATCGCAAAACCAGCAGGAACAGAATGAACAAGATTTATTGGCATTGGATAAGTGGGCAAGTCTGTGGAGTTGGTTTGACATATCAAATTGGTTATGGTATATAAAAATATTCATAATAATAGTAGGAGGCTTAATAGGATTAAGAATAGTTTTTGCTGTGCTTTCTATAATAAATAGAGCCAGGCAGGGATACTCACCCTTGTCATTGCAGACCCTTATCCCGCACCCAGAGGGACCAGACAGGCCCGGAAGAATCAACGAAGAAGGTGGAGAGCAAGGCAGAGACAGATCGATTCGATTGGTGAGCGGATTCTTAGCACTTGTCTGGGACGATCTGCGGAGCCTGTGTCTCTTCAGCTACCACCGATTGAGAGACTTCATCTCGATTGCAGCGAGGACTGTGGAACTTCTGGGACGCAGCAGTCTCAAGGGACTGAGACTGGGGTGGGAGGGCCTCAAGTATCTGGGGAATCTTCTGGGATATTGGGGTCAGGAACTAAAGAGTAGTGCTATCAATCTAATAGATACCATAGCAATAGTAGTAGCTAGGTGGACAGATAGGGTTATAGAAATAGGACAAAGACTTTGTAGAGCCATTCGTAACATACCTAGGAGAATCAGACAGGGCGCAGAAAGGGCTTTGCAATAACATGGGGGGCAAATGGTCAAAAAGTAGTATAGTGGGATGGCCTCAGGTTAGGGAAAGAATAAGACGAGCTCCTGCTCCAGCAGCAAGAGGAGTAGGACCAGTATCTCAAGATTTGGATAAGCATGGAGCAGTCACAAGCAGTAATACAGCAGCCAATAATGCTGATTGCGCCTGGCTGGAGGCGCAAGAGGAAGAGGAGGTAGGCTTTCCAGTCAGGCCGCAGGTACCTTTGAGACCGATGACATATAAGGGAGCTTTCGATCTCAGCCACTTTTTAAAAGAAAAGGGGGGACTGGATGGGCTAATTTACTCCAAGAAAAGACAAGAAATCCTTGATCTGTGGGTCTATCACACACAAGGCTACTTCCCTGATTGGCAGAATTATACCCCAGGGCCAGGGATTAGATTCCCACTAACATTTGGGTGGTGCTACAAGCTAGTACCAGTTGACCCAGAGGAAGTAGAAGAGGCCACAGAGGGAGAGAACAACAGCCTATTACACCCTATATGCCAACACGGAATGGATGATGAGGAGAAAGAAGTGTTAAGGTGGAAGTTTGACAGTCGCCTGGCTCTAACACACAGAGCCCGAGAGCTACATCCGGAGTTCTACAAAGACTGCTGACACAGACTGCTGACATGAAGTTGCTGACAGGGACTTTCCGCGGGGACTTTCCAGGGGAGGTGTGGTTTGGGCGAAGTTGGGGAGTGGCTAACCCTCAGATGCTGCATATAAGCAGCTGCTTTTCGCCTGTACTGGGTCTCTCTGGTTAGACCAGATCGAGCCTGGGAGCTCTCTGGCTAGCTAGGGAACCCACTGCT
>A1.KE.00.KER2012_AF457055_C.BW.96.96BW15C02_AF110974
GCGAGAGCGTCAGTATTAAGTGGGGGAAAATTAGATGCATGGGAGAGAATTCGGTTAAGGCCAGGGGGAAAGAAACAATATAGACTGAAACATCTAGTATGGGCAAGCAGGGAGCTGGACAGATTTGCACTTAACCCTAGCCTTTTAGAAACAACAGAAGGATGTCAACAAATAATAACACAGTTACAACCAGCTATCGGAACAGGAACAGAAGAACTTAAATCATTATATAATACAGTAGCAACCCTCTATTGTGTACATCAGGGGATAAAGGTAAAAGACACCAAGGAAGCTCTAGATAAAATAGAGGAAATACAAAAGAAAAGCAAACAACAGACAGCAGCTGACACAGGAAGCAGCAGCCAAAATTACCCTATAGTGCAAAATGCACAAGGGCAAATGATACACCAGTCCTTGTCACCTAGGACTTTGAATGCATGGGTGAAAGTAATAGAAGAAAAGGCTTTCAGCCCAGAAGTAATACCCATGTTTTCAGCATTATCAGAAGGAGCCACCCCACAAGATTTAAATATGATGCTGAACATAGTGGGGGGACACCAGGCAGCTATGCAAATGTTAAAAGACACCATCAATGAGGAAGCTGCAGAATGGGACAGGCTACATCCAGTACATGCAGGGCCTCCTGCACCAGGCCAGCTGAGAGAACCAAGGGGAAGTGATATAGCAGGAACTACTAGCACCCCTCAAGAACAGATAGGATGGATGACAGGCAACCCACCTATCCCAGTGGGAGACATCTATAAAAGATGGATAATTCTGGGATTAAATAAAATAGTAAGAATGTATAGCCCTGTTAGCATTCTGGATATAAAACAAGGGCCAAAAGAACCCTTCAGAGATTATGTAGATAGGTTCTTTAAAGTTCTCAGAGCTGAGCAAGCTACACAGGAGGTAAAAGGTTGGATGACAGAAACATTATTGATCCAAAATGCAAATCCAGATTGTAAGTCCATTTTAAGAGCATTAGGAGCAGGGGCTACATTAGAAGAAATGATGACAGCATGCCAGGGAGTGGGAGGACCCGGCCATAAAGCAAGGGTCTTGGCAGAGGCAATGAGCCAAGTACAACAAACAAACATAATGATGCAGAGAGGCAATTTTAGGGGCCAAAAAAGGATTAAGTGTTTCAACTGTGGCAAAGAAGGACACCTAGCCAGAAATTGCAGGGCCCCTAGGAAAAAGGGCTGCTGGAAATGTGGGAAGGAGGGACACCAGATGAAAGACTGCACTGAGAGACAGGCCAATTTTTTAGGGAAAATTTGGCCTTCCAGCAAGGGGAGGCCAGGGAATTTTCCTCAGAGCAGGCCAGAGCCAACAGCCCCACCAGCAGAGAGCTTCAAGTTCGAGGAGACAACCCCCGCTCCGAAGCAGGAGCCGAAAGACAGGGAACCCTTAATTTCCCTCAAATCACTCTTTGGCAGCGACCCCTTGTCTCAATAAAAGTAGGGGGTCAAATAAAGGAGGCTCTCTTAGACACAGGGGCTGATGATACAGTATTAGAAGAAATGAGTTTGCCAGGAAAATGGAAACCAAAAATGATAGGGGGAATTGGAGGTTTCATTAAGGTAAAACAGTATGATCAGATAGTTATAGAAATTTGTGGAAAAAAGGCTATAGGTACAGTATTGGTAGGACCTACACCTGTCAACATAATTGGAAGAAATATGTTGACCCAGATTGGCTGTACTTTAAATTTCCCAATTAGTCCTATTAGTACTGTACCGGTAAAACTAAAGCCAGGAATGGATGGCCCAAGGGTTAAACAATGGCCATTGACAGAAGAAAAAATAAAAGCATTAACAGAGATTTGTAAAGAGATGGAAAAGGAAGGAAAAATTTCAAAAATTGGGCCTGAAAATCCATACAATACCCCAATATTTGCTATAAAGAAAAAAGACAGCACTAAATGGAGAAAATTAGTAGATTTCAGAGAGCTCAATAAAAGAACTCAAGACTTTTGGGAAGTTCAATTAGGAATACCGCATCCAGCGGGCTTAAAAAAGAAAAAATCAGTAACAGTACTAGATGTGGGGGACGCATATTTTTCAGTTCCCTTAGATGAAAGCTTTAGAAAGTATACTGCATTCACCATACCTAGTACAAACAATGAGACACCAGGAATCAGGTATCAGTACAATGTGCTTCCACAGGGATGGAAAGGATCACCGGCAATATTTCAGAGTAGCATGACAACAATTTTAGAGCCCTTTAGATCAAAAAATCCAGAAATAATTATCTATCAATACATGGATGACTTATATGTAGGATCTGATTTAGAAATAGGGCAACATAGAGCAAAAATAGAGGAGTTGAGAGCTCATCTATTGAGCTGGGGACTTACTACACCAGACAAAAAGCATCAGAAAGAACCCCCATTTCTTTGGATGGGATATGAACTCCATCCTGACAAGTGGACAGTCCAACCTATACAGCTGCCAGAGAAAGAAAGCTGGACTGTCAATGATATACAGAAATTAGTGGGAAAACTAAATTGGGCAAGCCAAATTTACCCAGGGATTAAAGTAAAACAATTGTGTAGACTCCTCAGGGGAGCCAAAGCACTGACAGATGTAGTAACATTGACTGAGGAAGCAGAATTAGAACTGGCAGAAAACAGGGAGATTCTAAAAGACCCTGTGCATGGAGTATATTATGACCCATCAAAAGACTTGATAGCAGAAATACAGAAACAAGGGCAAGACCAATGGACATATCAAATTTATCAAGAGCCATTTAAAAATTTAAAAACAGGAAAATATGCAAGAAAGAAATCTGCTCATACTAATGATGTAAAACAATTAGCAGAAGTGGTGCAAAAGGTGGTCATGGAAAGCATAGTAATATGGGGAAAGACTCCTAAATTTAAACTACCCATACAAAAGGAAACATGGGAAACATGGTGGATGGATTATTGGCAGGCTACCTGGATTCCTGAATGGGAATTTGTCAATACCCCTCCTCTGGTAAAATTATGGTACCAGTTAGAGAAAGACCCCATAGCAGGAGCAGAAACTTTCTATGTAGATGGGGCAGCCAATAGGGAGACTAAACTAGGGAAGGCAGGGTATGTCACTGACAGAGGAAGACAAAAGGTTGTTCCCCTAACTGAGACAACAAATCAAAAGACTGAATTATATGCAATAGATTTAGCCTTGCAGGATTCAGGATCAGAAGTAAACATAGTAACAGATTCACAGTATGCATTAGGAATCATCCAGGCACAACCAGACAGGAGTGAATCAGAGATAGTCAATCAAATAATAGAGAAGCTAATAGGAAAGGACAAGGTCTACCTGTCATGGGTACCAGCACACAAAGGAATTGGAGGAAATGAACAAGTAGATAAATTAGTCAGTTCTGGAATCAGGAAGGTGCTATTTTTAGATGGAATAGATAAAGCTCAAGAAGAACATGAAAGATATCACAGTAATTGGAGAGCAATGGCTAGTGATTTTAATCTGCCACCTATAGTAGCAAAGGAAATAGTAGCCAGCTGTGATAAATGCCAGCTAAAAGGGGAAGCCATACATGGACAAGTAGACTGCAGTCCAGGGATGTGGCAATTAGATTGCACACATCTAGAAGGAAAAGTAATTCTGGTAGCAGTCCATGTAGCCAGTGGCTATATAGAAGCAGAAGTAATCCCAGCAGAAACAGGACAGGAGACAGCCTACTTTCTACTAAAATTAGCAGGAAGATGGCCAGTAAAAGTAGTACACACAGATAATGGCAGCAATTTTACCAGTGCTGCATTTAAAGCAGCCTGTTGGTGGGCAGGTGTCCAACAGGAATTTGGGATTCCCTACAATCCCCAAAGTCAAGGAGTAGTGGAATCTATGAATAGAGAATTAAAGAAAATCATAGGACAAGTAAGGGAGCAGGCTGAACACCTTAAGACAGCAGTACAAATGGCAGTATTCATTCACAATTTTAAAAGAAAAGGGGGGATTGGGGGGTACAGTGCAGGGGAAAGAATAATAGACATAATAGCAACAGACATACAAACTAAAGAATTACAAAAACAAATTACAAAAATTCAAAAATTTCGGGTTTATTACAGGGACAGCAGAGATCCAATTTGGAAAGGACCAGCAAAACTACTCTGGAAAGGTGAAGGGGCAGTGGTGATACAGGACAATAGTGATATAAAGGTAGTACCAAGAAGAAAAGCAAAGATCATTAGGGATTATGGAAAACAGGTGGCAGGTGATGATTGTGTGGCAGGTAGACAGGATGAGGATTAGAACATGGAACAGTTTAGTAAAATACCATATGTATGTCTCAAAGGAAGCTAAAGGTTGGTTTTATAGACATCACTATGAAAGTAGTCATCCAAAAGTAAGTTCAGAAGTACACATCCCACTAGGGGATGCTAAAATAGTAGTAAGAACATATTGGGGTCTGCATACAGGAGAAAAAGATTGGCACTTGGGTCATGGGGTCTCCATAGAATGGAGGCTAAAAAGATATAGCACACAAATAGATCCTGACGTGGCAGACCAACTAATTCATCAACATTATTTTGCCTGTTTTTCAGACTCTGCCATAAGGAGAGCCATATTAGGGCATGTAGTTAGCCCTAGGTGTGAATATCAAACAGGACATAACAAGGTAGGATCTCTACAATATTTAGCACTGAAAGCATTAGTAAAACCAACAAGGAGAAAGCCACCTTTGCCTAGTGTTAGGAAATTAACAGAGGATAGATGGAACAAGCCCCGGAAGACCAGGGGCCACAGAGGGAGCCATACAATGAATGGATGTTAGAGCTGTTAGAAGATCTTAAGCATGAAGCTGTAAGGCATTTTCCTAGGCCATGGCTTCATGGATTAGGACAACATATCTATAACACCTATGGGGACACTTGGGAAGGAGTTGAGGCTATAATAAGAATCTTGCAACAACTACTGTTTGTTCATTTCAGAATTGGGTGCCAACACAGCAGAATAGGCATTATTCGAGGGAGAAGAGCCAGGGATGGATCCGGTAGATCATAAACTAGAGCCCTGGAACCATCCGGGAAGTCAGCCTACAACTCCTTGTAGCAAATGCTACTGTAAAAAATGTTGCTATCATTGCATAGTTTGCTTTCAGACCAAAGGCTTAGGCATCTCCTATGGCAGGAAGAAGCGGAGACAGCGACGAGGAGCTTCTCAAAGCAGTAAGGATCATCAAAATCCTGTACCAAAGCAGTAAGTAGTAGTAATTAACATATGTAATGTCTCCTTTGGAAGTTTGGGCAATAGTAGGACTCGTAGTAGCGCTAATACTAGCAATAGTTGTGTGGACTATAGTAGGTATAGAATATAGAAAAGTGTTAAAGCAAAGAAAAATAGACAGGTTAATTGAGAGAATAACAGAAAGAGCAGAAGACAGTGGCAATGAGAGTGATGGGGATACAGAGGAATTGTCAGCACTTGTTGAGATGGGGAATTATAATCTTGGGTATGATAATGATCTGTAGTATGGCACAAAACTTGTGGGTTACTGTCTATTATGGGGTACCTGTGTGGAGAGATGCAGACACCACCCTATTTTGTGCATCAGATGCTAAAGCATATAAGACAGAAGTGCATAATGTCTGGGCTACACATGCCTGTGTGCCCACAGACCCCAACCCACAAGAAATATATTTGACAAATGTGACAGAAAATTTTAACATGTGGAAAAATAAAATGGTAGAGCAGATGCATGAAGACATAATTAGTCTATGGGACCAAAGCCTAAAGCCATGTGTACAGTTAACCCCTCTCTGCGTTACGTTAAACTGTAGCGATGTCACGAATAACACCCTCAGGAATGCCACTGTGAATGCCAATGCCAATGCCACTGTCACTGGGGACATGGAAGGAGAAATGAAAAACTGCTCTTACAATATGACCACAGCAGTAAGGGATAAGCAAAAGAAAGTATACTCACTTTTTTATAGGCTAGATGTAGTGCAAATTAGCAATAATAGTAGCAGTAGTAGTGAGTATAGATTAATAAATTGTAATACCTCAGCCATTACACAAGCTTGTCCAAAAGTAACCTTTGAGCCAATTCCCATACATTATTGTGCCCCAGCTGGTTTTGCGATCCTAAAGTGTAATGAAGAAGGGTTCAATGGAACAGGACCATGCAAAAATGTCAGCACAGTACAATGCACACATGGAATCAAGCCAGTAGTATCAACTCAACTGCTGTTAAATGGCAGTCTAGCAGAAAAAGGGGTAATAATCAGATCTGAAAACATCTCAAACAATGCTAAAACCATAATAGTACAACTTGCCGAGCCTGTAACAATTAATTGTACCAGACCTAACAACAATACAAGAAAAGGTATACATATAGGACCAGGACGAGCATTCTATGCAACAGGTGACATAATAGGGGATATAAGAAAAGCATATTGTAATGTCAGTAGAACACAATGGAATAAAACTTTGGCACAGGTAGCTGCACAATTAACAAAATATTGGAACAAAACAATAAACTTTACTAGCTCCTCAGGAGGGGATGTAGAAATTACAACACATAGTTTTAATTGTGGGGGAGAATTTTTCTATTGTAATACAACAAACCTGTTTAATAGCACCTGGAGAGGAAATAAAACTGTCAGCAATAGCACAGAGTTAGATGAAAATGGCACTATAACTCTCCCATGCAGAATAAAGCAAATTATAAATATGTGGCAGAGAACAGGACAAGCAATGTATGCCCCTCCCATCCAAGGAGTAATAAAGTGTGTATCAAACATTACAGGACTACTATTAACAAGAGATGGTGGAAGTGATAACAATATAAGTAGTGAAACCTTCAGACCAGGAGGAGGAGATATGAGGGACAATTGGAGAAGTGAATTATATAAGTATAAAGTAGTGAAACTTGAACCACTAGGAGTAGCACCCAACAAGGCAAGGAGAAGAGTGGTGGAGAGAGAAAAAAGAGCAGTTGGACTGGGAGCTGTATTCATTGGGTTCTTAGGAGCAGCAGGAAGCACTATGGGCGCGGCGTCAATAACGCTGACGGCACAGGCCAGACAATTATTGTCTGGCATAGTGCAACAGCAAAGCAATTTGCTGAAGGCTATAGAGGCTCAACAGCATCTGTTGAAACTCACGGTCTGGGGCATTAAACAGCTCCAGGCAAGAGTCCTGGCTCTGGAAAGATACCTAAAGGATCAACAGCTCCTAGGAATTTGGGGCTGCTCTGGAAAACTCATCTGCACCACTAGTGTGCCCTGGAACTCTAGTTGGAGTAATAAATCTTTTGAGCAAATATGGAATAACATGACCTGGTTGGAATGGGATAAAGAAGTTAGCAATTACACACAAATAATATATGAGCTACTTGAAGTATCGCAGAACCAGCAAGAAAAGAATGAACAAGACTTATTGTCATTGGACAAATGGGCAAGTCTGTGGAATTGGTTTGACATATCAAAATGGCTGTGGTATATAAAAATATTTATAATGATAGTAGGAGGCTTAATAGGCTTAAGAATAGTTTTTGCTGTGCTTTCTATAATAAATAGAGTTAGGCAGGGATACTCACCTTTGTCATTTCAGACCCTTACCCCAAACCCAGGGGGACTCGACAGGCCCGGAAGAATCGAAGAAGAAGGTGGAGAGCAAGGCAGAGACAGATCGATTCGATTAGTGAGCGGATTCTTAGCACTTGCCTGGGACGATCTGAGGAACCTGTGCCTTTTCAGCTACCACCGCTTGAGAGACTTCATCTTGATTGCCGCGAGGACTGTGGAACTTCTGGGACACAGCAGTCTCAAGGGGTTGAGACTGGGGTGGGAAGGGATCAAGTATCTGGGGAATCTCCTGTTGTATTGGGGTCGGGAACTGAAAAATAGTGCTATTAATTTGTTAGATACTATAGCAATAGCAGTAGCTGGCTGGACAGATAGGGTTATAGAAATAGGACAAAGAATTGGTAGAGCTATTCTCAACATACCTAGAAGAATCAGACAGGGCGCTGAAAGAATCTTAGTATAACATGGGTGGCAAGTGGTCAAAAAGTAGCATAGTGGGATGGCCTGAGGTTAGGAAAAGAATACAACAAACTCCTCCAGCAGCAAGAGGAGTAGGAGCAGTATCTCAAGATTTAGAAAAACATGGTGCAATCACAAGCAGTAATATAAATCATCCTAGTTGCACGTGGCTGGAAGCACAAGAAGAAGATGAGGAGGTAGGCTTTCCAGTCAGGCCACAAGTACCTTTAAGACCAATGACTTACAAGGGAGCTGTGGATCTCAGCCACTTTTTAAAAGAACAGGGGGGACTGGATGGGTTAGTTTGGTCCAGGAAAAGACAAGAAATCCTTGATCTGTGGGTCTACAACACACAGGGCTACTTCCCTGACTGGCAGAATTACACACCAGGGCCAGGGATCAGATTCCCACTAACATTTGGATGGTGCTTCAAGCTAGTACCAGTTGATCCAGATGAAGTAGAGAAGGCTAATGAAGGAGAGAACAACAGCCTGTTACATCCCATATGCCAACATGGAATGGATGACGAGGAGAAAGAAACATTAATATGGAGGTTTGACAGCCGCCTAGCACTGAAACACAGAGCCCAAGAGATACATCCGGAGTTCTACAAAGACTGCTGACACAGAACACTGGGGACTTTCCAGGGGAGGTGTGGTTTGGGCGGAGTTGGGGAGTGGCTAACCCTCAGATGCTGCATATAAGCAGCTGCTTTTCGCCTGTACTGGGTCTCTCTTGTTAGACCAGATCGAGCCTGGGAGCTCTCTGGCTAGCTAGGGAACCCACTGCT
>A1.KE.00.KER2008_AF457052_D.ZA.86.R482_AY773341
GCGAGAGCGTCAGTATTAAGTGGGGGAAAATTAGATGCATGGGAGAAAATTCGGTTAAGGCCAGGGGGAAAGAAAAAATATAGACTGAAACACTTAGTATGGGCAAGCAGGGAGCTGGAAAAATTCGCACTTAACCCTGGCCTTTTAGAAACTTCAGAAGGATGTCAGCAAATAATGAACCAAATACAACCAGCTCTTCAGACAGGAACAGAAGAACTTAGATCATTATTTAATGCAGTAGCAACCCTCTATTGTGTACATCAGCGGATAGAGGTAAAAGACACCAAGGAAGCTTTAGATAAAGTAGAGGAAATACAAAACAAGAGCAAACAAAAGACACAACAGGCAGCAGCTGATACAGGAAACAACAGCAAGGTCAGCCATAATTACCCTATAGTGCAAAATGCACAAGGGCAAATGATACATCAGTCCTTATCACCAAGGACTTTGAATGCATGGGTAAAGGTAATAGAAGAAAGGGGTTTTAGCCCAGAAGTAATACCCATGTTCTCAGCATTATCAGAAGGAGCCACCCCACAAGATTTAAATATGATGCTGAACATAGTGGGGGGACACCAGGCAGCTATGCAAATGTTAAAAGAAACCATCAATGAGGAAGCTGCAGAATGGGACAGATTACATCCAGCACAGGCAGGGCCTATTCCACCAGGCCAGATAAGAGACCCAAGGGGAAGTGACATAGCAGGAACTACTAGCACCCCTCAAGAACAAATAACATGGATGACAAACAACCCACCTATCCCAGTGGGAGACATCTATAAAAGATGGATAATCCTAGGATTAAATAAAATAGTAAGAATGTATAGCCCTGTTAGCATTCTGGATATAAAACAAGGGCCAAAAGAACCCTTCAGAGACTATGTAGATAGGTTCTTTAAAGTTCTCAGAGCCGAACAAGCTACACAGGAAGTAAAAGGTTGGATGACAGAGACCCTGCTGGTTCAAAATGCAAATCCAGATTGTAAATCCATCCTAAGAGCATTAGGAACAGGGGCTACATTAGAAGAAATGATGACAGCATGCCAGGGAGTGGGAGGACCCAGCCATAAAGCAAGGGTTTTAGCTGAGGCAATGAGTCAAGCACAACAGGCAAATGTAATGATGCAGAGGGGCAATTTTAAGGGCCAGAAAAGAATTAAGTGTTTCAACTGTGGCAAAGAGGGACACCTAGCCAGAAATTGCAGAGCCCCTAGGAAAAAAGGCTGTTGGAAGTGTGGGAAAGAAGGACACCAAATGAAAGATTGCATTGAGAGACAGGCTAATTTTTTAGGGAAAATTTGGCCTTCCAGCAAAGGGAGGCCAGGGAATTTTCCTCAGAGCAGACCGGAGCCAACAGCCCCACCAGCAGAGATCTTTGGGATGGGGGAAGAGATAACCTCCCCTCCGAAGCAGGAGCAGAAAGAGAGGGAACAAACCCCACCCTTTGTTTCCCTCAAATCACTCTTTGGCAACGACCCGTTGTCACAGTAAAAGTAGGAGGAGAGATGAGAGAAGCTCTATTAGATACAGGAGCAGATGATACAGTATTAGAAGATATAAATTTGCCAGGAAAATGGAAACCAAAAATGATAGGGGGAATTGGAGGTTTTATCAAGGTAAAACAATATGATCAGGTATCTATAGAAATTTGTGGAAAAAAGGCTATAGGTACAGTATTAGTAGGACCTACACCTGTCAACATAATTGGAAGAAATATGTTGACTCAAATTGGTTGTACTTTAAATTTTCCAATTAGTCCTATTGAAACTGTACCAGTAACATTAAAGCCAGGAATGGATGGCCCAAGGGTTAAACAATGGCCATTGACAGAAGAAAAAATAAAAGCATTGACAGAAATTTGTCAAGAGATGGAAAAGGAAGGAAAAATTTCAAAAATTGGGCCTGAAAATCCATACAATACTCCAATATTTGCAATAAAGAAAAAAGATAGCACTAAATGGAGGAAATTAGTAGATTTCAGAGAGCTCAATAAAAGAACACAAGACTTTTGGGAAGTTCAATTAGGGATACCGCACCCAGCGGGACTAAAAAGGAAAAAATCAGTAACAGTACTAGATGTGGGGGACGCATATTTCTCAGTTCCCCTAGATAAAAACTTTAGAAAGTATACTGCATTTACCATACCTAGTTTAAATAATGAAACACCAGGAATTAGGTATCAATACAATGTGCTTCCACAAGGATGGAAAGGATCACCAGCAATATTCCAGTGCAGTATGACAAAAATCTTAGAGCCCTTTAGATCAAAAAATCCAGAAATAATTATCTATCAATATATGGATGACCTGTATGTAGGATCAGATTTAGAAATAGGGCAGCATAGAGCAAAAATAGAAGAATTAAGAGCTCATCTACTGAGCTGGGGATTTACTACACCAGACAAAAAGCATCAGAAAGAACCTCCATTCCTTTGGATGGGATATGAGCTCCATCCTGACAAGTGGACAGTCCAGCCTATAGAGCTGCCAGAAAAAGAAAGCTGGACTGTCAATGATATACAGAAATTAGTGGGAAAACTAAATTGGGCCAGTCAAATTTATCCAGGAATTAAAGTAAAGCAATTATGTAAACTTCTTAGGGGAGCCAAAGCACTAACAGATATAGTAACACTGACTGAGGAAGCAGAATTAGAATTAGCAGAGAACAGGGAGATTCTAAAAGACCCTGTACATGGAGTATATTATGACCCATCAAAAGACTTAACAGCAGAAATACAGAAGCAAGGGCAAGACCAATGGACATACCAAATTTATCAGGAGCCATTTAAAAATTTAAAGACAGGAAAATATGCAAGAAAAAGGTCTGCCCACACTAATGATGTAAGACAATTAGCAGAAGTGGTGCAGAAAGTGGTCATGGAAAGCATAGTAATATGGGGAAAGACTCCTAAATTTAAACTACCCATACAAAAAGAGACATGGGAGACATGGTGGATGGACTATTGGCAGGCTACCTGGATTCCTGAATGGGAGTTTGTCAATACCCCTCCCCTAGTAAAATTATGGTACCAGTTGGAGAAAGACCCCATAGCAGGAGCAGAGACTTTCTATGTAGATGGGGCAGCCCATAGGGAGACTAAGCTAGGAAAGGCAGGATATGTCACTGACAGGGGAAGACAAAAGGTTGTTTCCCTGACTGAGACAACAAATCAAAAAACTGAACTACATGCAATTTATCTAGCCTTGCAGGATTCAGGATCAGAAGTAAATATAGTAACAGACTCACAGTATGCATTAGGAATCATTCAGGCACAACCAGACAGAAGTGAATCAGAGATAGTTAATCAAATAATAGAGAAGCTAATAGGAAAGGACAAAGTCTACCTGTCATGGGTACCAGCACACAAAGGGATTGGAGGAAATGAACAAGTAGATAAATTAGTCAGCTCTGGAATCAGGAGGGTACTATTTCTAGATGGGATAGATAAGGCTCAAGAAGAACATGAAAGATATCACAACAATTGGAGAGCAATGGCTAGTGATTTTAATATCCCACCTATAATAGCAAAGGAAATAGTAGCCAGCTGTGATAAATGTCAACTAAAAGGGGAAGCCATGCATGGACAAGTAGACTGTAGTCCAGGGATGTGGCAATTAGATTGCACACATCTAGAAGGAAAAGTAATTCTGGTAGCAGTCCATGTAGCCAGTGGCTATATAGAAGCAGAAGTTATCCCAGCAGAAACAGGACAGGAGACAGCATACTTTCTGCTAAAATTAGCAGGAAGATGGCCAGTAAAAGTAGTACACACAGACAATGGCAGCAACTTCACCAGCGCTGCATTTAAAGCAGCCTGTTGGTGGGCAAATGTCCAACAAGAATATGGAATTCCCTACAATCCCCAAAGTCAAGGAGTAGTGGAATCTATGAATAAGGAATTAAAGAAAATCATAGGGCAGGTAAGGGACCAAGCTGAACACCTCAAGACAGCAGTACAAATGGCAGTATTCATTCACAATTTTAAAAGAAAAGGGGGGATTGGGGGGTACAGTGCAGGGGAAAGAATAATAGACATAATAGCATCAGACATACAAACCAAAGAACTACAAAAACAAATTACAAAAATTCAAAATTTTCGGGTTTATTACAGGGACAGCAGAGATCCACTTTGGAAAGGACCAGCAAAACTACTCTGGAAAGGTGAAGGGGCAGTAGTAATACAGGACAATAGTGATATAAAGGTAGTACCAAGGAGAAAAGCAAAGATTATCAGGGACTATGGAAAACAGATGGCAGGTGATGATTGTGTGGCAGGTAGACAGGATGAGGATTAGAACATGGAACAGTTTAGTAAAACATCATATGTATATTTCAAAGAAAGCTAAAGGTTGGTTTTATAGACATCACTATGAAAGCAGGCATCCAAAAGTAAGTTCAGAAGTACACATCCCACTAGGGGATGCTAAATTAGTAGTAAGGACATATTGGGGTCTGCATCCAGGAGAAAAAGATTGGCACTTGGGTCATGGGGTCTCCATAGAATGGAGGCTAAAAAGATATAGCACACAAGTAGATCCTGAACTGGCAGACCAACTAATTCATCTGCATTATTTTAACTGTTTTTCAGAATCTGCCATAAGGAAAGCCATATTAGGACAAGTAGTTAGCCCTAGTTGTGAATATCAAGCAGGACATAACAAGGTAGGATCTCTACAATATTTGGCACTGAAAGCATTAGTAACACCAAAGAAGACAAAGCCACCTTTGCCTAGTGTTAAGAAACTAGCAGAGGATAGATGGAACAAGCCCCAGAAGATCAGGGGCCACAGAGAGAGCCATACAATGAATGGACATTAGAATTGTTAGAAGAGCTTAAAAATGAAGCTGTTAGACATTTTCCTGGGCCATGGCTTCATGGATTAGGACAATATATCTATCACACCTATGGGGATACTTGGGAAGGAGTTGAAGCTATGCTAAGAATTTTGCAACAACTACTGTTTGTTCATTTCAGAATTGGGTGCACACATAGCAGAATAGGCATTATTCCCAGGAGAAGAGCCAGGGATGGATCCGGTAGATCCTAACCTAGCGCCCTGGCAACACCCGGGAAGTCAGCCTACAACTCCTTGTAACAAGTGTTTCTGTAAAAAGTGTTGCTATCATTGTCCAGTTTGCTTGCTGAACAAAGGCTTAGGCATCTCCTATGGCAGGAAGAAGCGGAGACAGCGACGAGGAACTCCTCAAAGCAATAAGGATCATCAAAATCCTATACCAAAGCAGTAAGTACTTAGTAACTAATATATGTAATGTTGTCTGCTTTAGAAATCTGTGCAATTGCAGGACTGGTAATAGCTTTAATCATAGCAATAGTTGTGTGGACTATAGTAGGTATAGAATATAGGAGATTGTTAAAACAAAGAAAAATAGACAGGTTAATTGAGAGAATAAGAGAAAGAGCAGAAGACAGTGGCAATGAGAGTGATGGGGACACAGAGGAATTGGCAGCCCTTATTGAGATGGGGAACTATGATCTTGGGGATGCTAATGATCTGTAGTGCTGCAGACAACTTGTGGGTTACTGTCTATTATGGGGTACCTGTGTGGAAAGATGCAGAGACCACCTTATTTTGTGCATCAGATGCTAAAGCATATGAGACAGAAAAACATAATGTCTGGGCTACACATGCCTGTGTACCCACAGACCCCAGCCCACAAGAAATACCTTTGAAAAATGTGACAGAAAAGTTTAACATGTGGAAAAATAACATGGTAGAACAGATGCATACAGATATAATCAGTCTATGGGACCAAAGCCTAAAGCCATGTGTACAGTTAACCCCTCTCTGCGTCACTCTAAATTGTAGTGACGTCACCACCAATAACACCAAGGTCAATACCACCAGTGCCCCTACCACCGCTGCCACTGTCAACAATGACAGTGACATGAAAAACTGTTCTTACAATATGACCACAGAACTAAGGGATAAGAAACAGAAAATGTATTCACTCTTTTATAGACTTGATGTAGAACTAATAAATAAGAATAATAGTAATAGCACTGAGTATGTATTAATAAATTGTAAAACCTCAACCCTTACACAGGCTTGTCCAAAGGTATCCTTTGAGCCAATTCCCATACATTATTGTGCTCCAGCTGGTTTTGCGATTCTAATGTGTAAGGATAAGGAGTTCAATGGAACAGGGCTATGCAAGAATGTCAGCACAGTACAATGCACACATGGAATCAAGCCAGTAGTGTCTACTCAACTACTATTAAATGGCAGTTTAGCGGAAAAAAGGGTAATGATTAGATCTGCAAATATCACAGACAATACCAAAAACATAATAGTACAACTTAAGGATCCTGTAGAAATTAATTGTACCAGACCTAACAACAATACAAGAAGAGGTGTACATATAGGGCTAGGGAGAAGATTCTATACAACACAGGTAGTAGGGGATATAAGACAAGCATATTGTAATGTCAGTAAATCAAAATGGGATGATACTTTGAAAAAAGTAGTTTACCAATTAAGAAAATACTTTAACAAAACAATAATCTTTAACTCCTCCTCAGGAGGGGATGTAGAAATTACAACACATATGTTTACTTGTGGAGGAGAGTTTTTCTATTGTAATACATCAGGCCTGTTCAATAGCACTTGGCCTGTCAATCAGGAGTCAAATAGCACAAAGTCAAATGGCATTATAACTCTCCGATGCAGAATAAAGCAAATCATAAATATGTGGCAGAGAACAGGACAAGCAATGTATGCCCCTCCCATTCAAGGAATAATAAAGTGTGTATCAAACATTACAGGACTACTGTTAACAAGAGATGGTGGGAATAGTACTGTCAATGAAACTTTCAGACCTGGAGGAGGAGATATGAGGGACAATTGGAGAAGTGAATTATATAAGTATAAAGTAGTAAAAATTGAACCACTAGGAGTAGCACCCACCAAGGCAAGGAGAAGAGTGGTGGGAAGAGAAAAAAGAGCAGTTGGAATAGGAGCTGTTTTCCTTGGGTTCTTAGGAGCAGCTGGCAGCACTATGGGCGCGGCGTCAATAACGCTGACGGTACAGGCCAGACAATTACTGTCTGGCATAGTGCAACAGCAAAACAATTTGCTGAGGGCTATAGAGGCTCAACAACAACTGTTGAAACTCACGGTCTGGGGCATTAAACAGCTCCAGGCAAGAGTCCTGGCTGTGGAAAGATACCTAAGGGATCAACAGCTCCTAGGAATTTGGGGCTGCTCTGGAAAACTCATCTGCACCACTAATGTGCCTTGGAACTCCAGTTGGAGTAATAAGTCTCAGAGTGAGATATGGGACAACATGACCTGGCTGCAATGGGATAGAGAAATTAACAATTATACAGACATAATATATAGACTACTTGAAGATTCGCAAAACCAGCAGGAAAAGAATGAACAAGACTTATTGGCATTGGACAAGTGGGCAAGCCTGTGGACTTGGTTTGACCTATCAAACTGGCTGTGGTACATAAAAATATTTATAATGATAGTAGGAGGTTTAATAGGATTAAGAATAGTTTTTGCTGTGCTTGCTGTAATAAATAGAGTTAGGCAGGGATACTCACCTTTGTCGTTCCAGACCCTTACCCCAAACCCAAGGGAACTCGACAGGCCCGGAAGAATCGAAGAAGAAGGTGGAGAGCAAGACAGAGGCAGATCGATTCGCTTAGTGAGCGGATTCTTAGCACTTGCCTGGGACGACCTGCGGAGCCTGTGCCTCTTCAGCTACCACCACTTGAGAGACTTCATCTTGATTGCAGCGAGGATTGTGGGACTTCTGGGACGCAGGGGGTGGGAAGGCCTCAAGTATCTGTGGAATCTCCTGATATATTGGGGTCAGGAACTAAAAACTAGTGCTGTTAGCTTGCTTGATACCACAGCAATAGTAGTAGCTGGCTGGACAGATAGGGTTCTAGAAATAGGACAAAGAATTGGTAGGGCTTTTATCAACATACCTAGAAGAATTAGACAGGGTTTTGAAAGGGCTTTGCTGTAACATGGGTGGCAAGTGGTCAAAAAGTAGCATAGTGGGATGGCCTCAGATTAGGGAAAGAATAAGACGTACTAATCCAGCAGCAGATGGGGTGGGAGCAGTATCTCGAGACCTAGAAAAACATGGGGCAATCACAAGTAGCAATACAGCAAGTACTAATGCTGACTGTGCCTGGCTAGAAGCACAAGAAGAGAGTGAGGAAGTGGGCTTTCCAGTCAAACCTCAGGTACCTTTAAGACCAATGACTTACAAAGCAGCTGTAGATCTTAGCCACTTTTTAAAAGAAAAGGGGGGACTGGAAGGGTTAATTTACTCCAGGAAAAGACAGGAAATCCTTGATTTGTGGGTCTACCACACACAAGGCTTTTTCCCTGATTGGCATAATTACACACCAGGGCCAGGAATTAGGTTCCCACTAACATTTGGATGGTGCTTCAAGCTGGTGCCAGTTGATCCAGATGAAGTAGAAAGAGCTACTGAGGGAGAGAACAACAGCCTGTTACACCCGATATGTCAACATGGAATGGATGATGAAGAGAGAGAAGTATTAAAGTGGCAGTTTGACAGCCGCCTGGCATTTACACACCAAGCCAGAGAGATACATCCGGAGTACTACAAAGACTGCTGACACAGAAGTTGCTGACTGGGGACTTTCCACTGGGGACTTTCCAGGGGAGGTGTGGTTTGGGCGGAGTTGGGGAGTGGCTAACCCTCAGAAGCTGCATATAAGCAGCCGCTTTTCGCTTGTACTGGGTCTCTCTTGTTAGACCAGGTCGAGCCCGGGAGCTCTCTGGCTAGCGAGGGAACCCACTGCT
>A1.TZ.01.A173_AY253305_F1.BE.93.VI850_AF077336
GCGAGAGCGTCAATATTAAGTGGGGGAAAATTGGATGCATGGGAGAAAATTCGGTTAAGGCCAGGGGGAAAGAAAAAATATAGACTAAAACACCTAGTATGGGCAAGCAGGGAGCTGGACAGATTCGCACTTAACCCTAGCCTTTTAGAAACAACAGAAGGATGTCAACAGATAATGAACCAGTTACAACCAGCTGTCAAGACAGGAACAGAAGAAATTAAATCATTATTTAATACAGTAGCAACCCTCTATTGTGTACATCAACGGATAGATGTAAAAGATACCAAGGAAGCTCTAGATAAAATAGAGGAAATACAGAATAAGAGCAAGCAAAAGACACAACAGGCAGCAGCTGACACAGGAGACAGCAGCAAGGTCAGCCAAAATTACCCTATAATACAAAATGCACAAGGGCAAATGATACACCAGAACTTGTCACCTAGGACTTTAAATGCATGGGTAAAAGTAATAGAAGAAAAGGCTTTCAGCCCAGAAGTAATACCCATGTTCTCAGCATTATCAGAAGGAGCCACCCCACAAGATTTAAATGTGATGCTGAACATAGTGGGGGGACATCAAGCAGCTATGCAAATGTTAAAAGACACCATCAATGAAGAAGCTGCAGAATGGGACAGGTTACATCCAGTACAGGCAGGGCCTATTCCACCAGGCCAGATAAGAGAACCAAGAGGAAGTGACATAGCAGGAACTACTAGCACCCCTCAAGAACAATTACAATGGATGACAGGTAACCCACCTATCCCAGTGGGAAACATTTATAAAAGGTGGATAATCCTGGGATTAAATAAAATAGTAAGAATGTATAGCCCTGTTAGTATTTTGGATATAAAACAAGGGCCAAAAGAACCCTTCAGAGACTATGTAGATAGGTTCTTTAAGGCTCTCAGAGCTGAGCAAGCTACACAGGATGTAAAAGGTTGGATGACAGAAACCTTATTGGTCCAAAATGCAAATCCAGATTGTAAGTCCATCTTAAAAGCATTAGGATCAGGGGCTACATTAGAAGAAATGATGACAGCATGCCAGGGAGTGGGAGGACCTGGCCATAAAGCAAGGGTTTTAGCTGAGGCAATGAGCCAAGCACAACAGACAAACATAATGATGCAGAGAGGTAATTTTAGGGGCCAGAAAAGGATTAAGTGTTTTAACTGTGGCAAGGAAGGACACCTAGCCAGAAATTGCAGGGCCCCTAGGAAAAAGGGCTGTTGGAAATGTGGGAAAGAGGGACACCAAATGAAAGACTGCACTGAGAGACAGGCTAATTTTTTAGGGAAAATTTGGCCTTCCAGCAAAGGGAGGCCAGGAAATTTTCCCCAGAGCAGACCGGAGCCAACAGCCCCACCAGCAGAGCTCTTTGGGATGGGGGAAGGGATAGCCTCCCTTCCGAAACAGGAGCAGAAGGACAGGGAACAGGTCCCACCCTTAGTTTCCCTCAAATCACTCTTTGGCAACGACCCCTTGTCACAGTAAGAATAGGAGGACAGCTAAAAGAAGCCCTATTAGATACAGGAGCAGATGATACAGTATTAGAAGACATAAATTTGCCAGGAAAATGGAAACCAAAAATGATAGGGGGAATTGGAGGGTTTATCAAGGTAAAACAGTATGATCAGATACCTATAGAAATTTGTGGGAAAAGGGCTATAGGTACAGTATTAGTAGGACCTACACCTGTCAACATAATTGGAAGAAATATGTTGACCCAGATTGGTTGTACTTTAAATTTCCCAATTAGTCCTATTGAGACTGTACCAGTAAAATTAAAGCCAGGAATGGATGGCCCAAAAGTTAAACAATGGCCATTAACAGAAGAAAAAATAAGAGCATTAACAGAAATTTGTATGGAGATGGAAAAGGAAGGAAAAATTTCAAAAATTGGGCCTGAAAATCCATACAATACTCCAATATTTGCTATAAAGAAAAAAGACAGCACTAAATGGAGAAAATTAGTAGATTTCAGAGAGCTCAATAAAAGAACTCAAGACTTTTGGGAAGTTCAGTTAGGAATACCGCATCCAGCGGGCCTAAAAAAGAAAAAATCAGTAACAGTATTAGATGTGGGGGACGCATATTTTTCAGTTCCTCTAGATGAAAGCTTTAGGAAGTATACTGCGTTCACCATACCTAGTACAAACAATGAGACACCAGGAGTCAGGTATCAGTATAATGTGCTTCCACAGGGATGGAAAGGATCACCAGCAATATTCCAGAGTAGCATGACAAAAATCTTAGAGCCCTTTAGATCAAAAAATCCAGAAATAATTATCTATCAATACATGGATGACTTGTATGTAGGATCTGATTTAGAAATAGGGCAGCATAGAACAAAAATAGAAGAGTTGAGAAATCATCTATTGAAATGGGGATTTACTACCCCAGACAAAAAGCATCAGAAAGAACCACCATTTCTTTGGATGGGATATGAACTCCATCCTGACAAGTGGACAGTCCAGCCTATAGTACTGCCAGACAAAGAAAGCTGGACTGTCAATGATATACAGAAATTAGTGGGAAAACTAAATTGGGCAAGTCAAATTTATGCAGGGATTAAAGTAAAGCAATTGTGTAAGCTCCTCAGGGGAGCCAAAGCACTAACAGATATAGTAACAATGACTGAGGAAGCAGAATTAGAATTGGCAGAAAACAGGGAAATTCTAAAAGAACCTGTGCATGGAGTGTACTATGATCCATCAAAAGACTTAATAGTAGAAATACAGAAACAAGGGCAAGACCAATGGACATACCAAATTTATCAAGAGCCATTTAAAAATCTAAAAACAGGAAAATATGCAAGAAAGAGGTCTGCTCACACTAATGATGTAAAACAATTAGCAGAAGTGGTGCAAAAGGTGGTCACAGAAAGCATAGTAATATGGGGAAAGACTCCTAAATTTAAACTACCCATACAAAAGGAAACATGGGAAACATGGTGGATGGACTATTGGCAGGCTACCTGGATCCCTGAATGGGAATTTGTCAATACCCCTCCTCTAGTAAAATTATGGTACCAGTTAGAGAAAGACCCCATAATAGGAGCAGAGACTTTCTATGTAGATGGGGCAGCCAATAGGGAGACTAAGCTAGGAAGAGCAGGGTATGTCACTGATAGAGGAAGACAAAAGGTTGTTTCCCTAACTGAGACAACAAATCAGAAGACTGAACTACATGCAATCCAGCTAGCCTTGCAGGATTCAGGACCAGAAGTAAACATAGTAACAGACTCACAATATGCATTAGGAATCATTCAGGCACAACCAGACAGAAGTGACTCAGAGATAGTCAATCAAATAATAGAGAAGCTAATAGAAAAAGACAAAGTATACCTGTCATGGGTACCAGCACACAAAGGAATTGGAGGGAATGAACAGGTAGATAAATTAGTCAGTTCTGGAATCAGGAAGGTGCTATTTTTAGATGGGATAGATAAAGCTCAAGAAGACCATGAAAAATATCACAGCAATTGGAGAGCAATGGCTAGTGATTTTAATCTGCCACCTATAGTAGCAAAAGAAATAGTAGCCAGCTGTGATAAATGTCAACTAAAAGGGGAAGCAGTGCATGGACAAGTAGATTGTAGTCCAGGGATGTGGCAATTAGATTGTACACATCTAGAAGGAAAAGTAATTCTGGTAGCAGTCCATGTAGCCAGTGGATATATAGAAGCAGAAGTTATCCCAGCAGAAACAGGACCGGAGACAGCATACTTTCTGCTAAAATTAGCAGGAAGATGGCCAGTAAAAGTAGTACACACAGACAATGGCAGCAATTTCACCAGCGCTGCATTTAAAGCAGCCTGTTGGTGGGCAAGTGTCCAACAGGAATATGGGATTCCATACAATCCCCAAAGTCAAGGAGTAGTGGAATCTATGAATAAGGAATTAAAGAAAATCATAGGACAAGTAAGAGAGCAAGCTGAACACCTTAAAACAGCAGTACAAATGGCAGTATTCATTCACAATTTTAAAAGAAAAGGGGGGATTGGGGGGTACAGTGCAGGGGAAAGAATAATAGACATAATAGCAACAGACATACAAACTAAAGAATTACAAAAACAAATTACAAAAATTCAAAATTTTCGGGTTTATTACAGGGACAGCAGAGATCCAATTTGGAAAGGACCAGCAAAACTACTCTGGAAAGGTGAAGGGGCAGTAGTAATACAAGATAATAGTGATATAAAGGTAGTACCAAGAAGAAAAGCAAAGATCATTAGGGATTATGGAAAACAGATGGCAGGTGATGATTGTGTGGCAGGTAGACAGGATGAGGATTAGAACATGGAACAGTTTAGTAAAACATCATATGTATGTCTCAAGGAAAGCTAAAGATTGGTTTTATAGACATCACTATGAAAGCAGACATCCAAAAGTAAGTTCAGAAGTACACATCCCACTAGGGGATGCTAGATTAGTGGTACGAACATATTGGGGTCTGCAGACAGGAGAAAAAGATTGGCACTTGGGTCATGGGGTCTCCATAGAATGGAGGCTAAAAAGATATAGCACACAGATAGATCCTGACCTGGCAGACCAACTAATTCATCTGCATTACTTTGACTGTTTTTCAGACTCTGCCATAAGGAAAGCCATATTAGGACAAGTAGTTAGACCTAGGTGTGACTATCAAGCAGGACATAACAAGGTAGGATCTCTACAATATTTGGCACTGAAAGCATTAGTAACACCAAAAAAGATAAAGCCACCTTTGCCTAGTGTTAGGAAATTAGCAGAGGACAGATGGAACAAGCCCCAGGAGACCAGGGGCCACAGAGGGAGCCATACAATGAATGGGCACTAGAAATTTTAGAGGAGCTTAAGAATGAAGCTGTTAGGCATTTTCCTAGGCCATGGCTTCACGGCTTAGGCCAACATATCTATAACACCTATGGGGACACTTGGGAGGGAGTTGAAGCTATAATAAGGATATTGCAACAACTACTGTTTGTGCATTTCAGAATTGGGTGCCAACATAGCAGAATAGGCATTATTCGAGGAGGGAGAAGAGTCAGGAATGGATCCAGTAGATCCTAACCTAGAGCCCTGGAATCACCCAGGAAGTCAGCCTGCAACTGCTTGTAGCCCGTGTTACTGCAAAAAGTGTTGCTATCATTGTCAAGTTTGCTTTCTGAACAAAGGCTTAGGCATCTCCTATGGCAGGAAGAAGCGGAAACAGCGACGAAGACCTCCTCAAAGCAGTAAGGATCATCAAAATCCTATACCAAAGCAGTAAGTAAAATATATGTAATGACTCCTTTGGAAATTTGGGCAATAGTAGGACTGGTAGTGGCGCTAATCATAGTAATAGTTGTGTGGACTATAGTAGGCATAGAATATAAGAGATTGTTAAAACAAAGGAAAATAGACAGGTTGATTGAGAGAATAAGAGAAAGAGCAGAAGACAGTGGCAATGAGAGTGAAGGGGATACAGAGGAACTCTCAGCACTTCTTGAGATGGGGAACTATGATCTTGGGATTGATAATAATCTGTAGTGCTGCAGACAACTTATGGGTTACAGTCTACTATGGGGTACCAGTGTGGAAAGATGCAGAGACCACCTTGTTTTGTGCATCAGATGCGAAAGCATATGATGCAGAAGTGCATAATGTCTGGGCTACACATGCCTGTGTACCTACAGACCCCAACCCACAAGAAATACATTTGGAAAATGTGACAGAAGAGTTTAACATGTGGAAAAATAACATGGTAGAGCAGATGCATACAGATATAATCAGTCTATGGGACCAAAGCTTAAAGCCATGTGTAAAGTTAACCCCTCTCTGCGTTACTTTAAATTGTAGCAATGTCAGTAATAATACTGACAGTGACAACAGTGACAATGCCACCAATTCCACCATCACCAGGGAAATGATTGGAGAAATAAAAAACTGCTCTTTCAATATAACCACAGAAATAAGGGACAAGAAACAGAAAGTATATTCACTTTTTTATAAACTTGATGTAGTGGAAATTAGTAATAGTAATAGTAGTCAGTATAGATTAATAAACTGTAATACCTCAGCCATTACCCAGGCTTGTCCAAAGGTAACCTTTGAGCCAATTCCCATACACTATTGTGCTCCAGCTGGTTTTGCGATTCTAAAGTGTAAGAATAAAACGTTCAATGGAACAGGGCCATGCAATAATGTCAGCTCAGTACAATGCACACATGGAATCAGGCCAGTAGTATCAACTCAACTGCTGTTAAATGGCAGTCTAGCAGAAGGAGAGATACAAATTAGATCTGAGAATATCACAAACAATGCCAAAAATATAATAGTACAATTTACCGAGCCTGTACAAATTATTTGCATCAGACCTAACAACAATACAAGAAAAAGGGTACATATAGGACCAGGACAGACATTCTATGCAACAGACATAATAGGGAATATAAGACAAGCATATTGTACTGTCAATAGAACAGAATGGAATACAACTTTGCAAAAGGTAGGCAAACAATTAAGAGATTTATACTTTAATAACAAAACAATAATTTTTACTAGCTCCTCAGGAGGGGATCTAGAAATTACAACACATAGTTTTAATTGTGGGGGAGAATTTTTCTATTGTAACACATCAGGCCTGTTTAATGGCCTGTTTAATGGCACCTGGAATGGCAATCACACAAACAGCACGGAGTTAAATAGCACTATAATTCTCCAATGCAAAATAAAGCAAATTATAAATATGTGGCAGAGAGCAGGACAAGCAATATATGCCCCTCCCATCCAAGGAGTAATAAAGTGTGTATCAAATATTACAGGACTAATATTAACAAGAGATGGTGAGAGGAACAATAGTCTAAATGAAACCTTCAGACCTGGAGGAGGAGATATGAGGGACAATTGGAGAAGTGAATTATATAAGTATAAAGTAGTAAAAATTGAACCACTAGGAGTAGCACCTACCAGGGCAAAGAGAAGAGTGGTGGAGAGAGAAAAAAGAGCAGTCGGACTGGGAGCTGTCTTCATTGGGTTCTTAGGAGCAGCAGGAAGCACTATGGGCGCGGCGTCAGTAACGCTGACGGTACAGGCCAGACAATTATTGTCTGGCATAGTGCAACAGCAAAGCAATTTGCTGAGGGCTATAGAGGCTCAACAGCATCTGTTGAAACTCACGGTCTGGGGCATTAAACAGCTCCAGGCAAGAGTCCTGGCTGTGGAAAGATACCTAAAGGATCAACAGCTCCTAGGAATTTGGGGCTGCTCTGGAAAACTCATCTGCACCACTAATGTGCCCTGGAATTCTAGTTGGAGTAATAAATCCCATGATGACATATGGAATAACATGACCTGGCTGCAATGGGATAAAGAGATTAGCAATTACACACAGCTAATATATAATCTAATTGAAGAATCACAGAACCAGCAGGAAAAGAATGAACAAGAGTTATTGGCATTGGACAAGTGGGCAAGTCTGTGGAATTGGTTTGATATATCAAATTGGCTGTGGTATATAAGGATATTTATAATGATAGTAGGAGGCTTAATAGGATTAAGAATAATTTTTGCAGTGCTTTCTATAATAAATAGAGTTAGGCAGGGATACTCACCTTTGTCATTTCAGACCCATACCCCAAACCCAAGGGATCTCGACAGGCCCGGAAGAATCGAAGAAGAAGGTGGAGAGCAAGGCAGAGACAGATCGATTCGATTAGTGAGCGGATTCTTAGCACTTGCCTGGGACGATCTCCGGAGCCTGTGCCTCTTCAGCTACCACCGCTTGAGAGACTTCACCTTGATTGTTGCGAGGACTGTGGAACTTCTGGGACACAACAGTCTCAAGGGGTTGAGACTGGGGTGGGAGGGCCTCAAGTATCTGGGGAATCTCCTGGTGTATTGGGGACAGGAACTAAAAAGTAGTGCTATTAATTTGCTTGATACCATAGCAATAGCAGTAGCTGGCTGGACAGATAGGGTTATAGAAATAGGACAAAGAATTTGTAGAGCTATTTACAACATACCTAGAAGAATCAGACAGGGCTTAGAAAGGGCTTTGCTATAATATGGGGGGCAAGTGGTCAAAAAGTAGCATAGTGGGATGGCCTGAGATTAGGGAAAGAATAAGACGAACCCCTCCAGCAGTAAGAGGAGTAGGAGCAGTATCTCAAGATCTAGATAAACATGGAGCAATCACAAACAGCAATATAAATCACCCTAGTTGTGTCTGGCTGGAAGCACAAGAGGATGAGGATGTGGGCTTTCCAGTCAGGCCACAAGTACCTCTAAGACCAATGACTTACAAGGCAGCTTTTGATCTCAGCTACTTTTTAAATCACTCCAGGAGGAGACAAGACATCCTTGATCTGTGGGTGTACCACACACAGGGCTACTTCCCTGATTGGCAGTGTTACACACCAGGGCCAGGGATCAGGTACCCACTAACGTTTGGATGGTGCTTCAAGCTAGTTCCAGTTGATCCAGAAGAAGTAGAGAAGGCTACTGAAGGAGAGAACACCCGCCTATTACACCCTATAAGCCAGCATGGAATGGATGATGATGAGAGAGAAACATTAAGGTGGACATTTGACAGCAAGCTGGCATTAAAACACATAGCCAGAGAGCTGCATCCGGACTTCTACAAAGACTGCTGACACAGAAGTTGCTGACAGGGACTTTCCGCTGGGGACTTTCCAGGGGAGGTGTGGTTTGGGCGGAGTTGGGGAGTGGCTAACCCTCAGATGCTGCATATAAGCAGCTGCTTTTCGCCTGTACTGGGTCTCTCTTGGTAGACCAGATTGAGCCT
>A1.KE.94.Q23_17_AF004885_F2.CM.02.02CM_0016BBY_AY371158
AAGCTTGCCTTGAGTGCTTCAAGTAGTGTGTGCCCGTCTGTTGTGTGACTCTGGTAACTAGAGATCCCTCAGACCACTCTAGACGGTGTGAAAATCTCTAGCAGTGGCGCCCGAACAGGGACTCGAAAGCGAAAGTTCCAGAGAAGTTCTCTCGACGCAGGACTCGGCTTGCTGAGGTGCACACAGCAAGAGGCGAGAGCGGCGACTGGTGAGTACGCCAATTTTTTGACTAGCGGAGGCTAGAAGGAGAGAGATGGGTGCGAGAGCGTCAGTATTAAGCGGGGGAAAATTCGATGCATGGGAGAAAATTCGGTTAAGGCCAGGGGGAAAGAAAAAATATAGAATGAAGCATCTAATATGGGCAAGCAGGGAGCTGGACAGATTTGCACTTAACCCTAGCCTTTTAGAAACAGCAGACGGATGTCAACAAATAATGGAAAAATTACAACCAGCTCTCAAGACAGGAACAGAAGAAATAAAATCATTATTTAATACTGTAGCAACCCTCTATTGTGTACATCAACGGATAGATGTAAAAGACACCAAGGAAGCTCTAGATAAAATAGAGGAAATAAAAAATAAGAGCAAGCAAAAGACACAACAGGCAGCAGCTGACACAGGAAACAGCAGCAATGTCAGCCAAAATTACCCTATAGTGCAAAATGCACAAGGGCAAATGATACACCAGTCCTTGTCACCTAGGACTTTGAATGCATGGGTAAAAGTAATAGAAGAAAAGGCTTTCAGCCCAGAAGTAATACCCATGTTCTCAGCATTATCAGAAGGAGCCACCCCACAAGATTTAAATATGATGCTGAACATAGTGGGGGGACACCAGGCAGCTATGCAAATGTTAAAAGATACCATCAATGAGGAAGCTGCAGAATGGGACAGGTTACATCCAGTACATGCAGGGCCTATCCCACCAGGCCAGATGAGAGAACCAAGGGGAAGTGACATAGCAGGAACTACTAGTACCCCTCAAGAACAAATAGGGTGGATGACAGGCAACCCACCTATCCCAGTGGGAGACATCTATAAAAGATGGATAATTCTGGGATTAAATAAAATAGTAAGAATGTATAGCCCTGTTAGCATTTTGGATATAAAACAAGGGCCAAAAGAACCCTTCAGAGATTATGTAGATAGGTTTTTTAAAACTTTCAGAGCTGAGCAAGCTACACAGGATGTAAAAAATTGGATGACAGACACATTACTGGTCCAAAATGCAAATCCAGATTGCAAGGCAATTTTAAGAGCATTAGGACCAGGGGCTACATTAGAAGAAATGATGACAGCATGCCAGGGAGTGGGAGGACCCGGCCATAAAGCAAGGGTTTTGGCTGAGGCAATGAGTCAAGTACAACATACAAACATAATGATGCAGAGAGGCAATTTTAAGGGCCAGAAAAGAATTAAGTGTTTCAACTGTGGCAAAGAAGGACACCTAGCCAGAAATTGCAGGGCCCTTAGGAAAAAGGGCTGTTGGAAATGTGGGAAGGAGGGACACCAAATGAAAGATTGCACTGAAAGACAGGCTAATTTTTTAGGGAAAATTTGGCCTTCCAGAAAGGGGAGGCCAGGGAATTTTCCTCAGAACAGACTGGAACCAACAGCTCCACCAGCAGAGACCTGTGGGATGGGGGAAGAGACAGTCTCCCCTCTGAAGCAGGAGCAGAAAGACAGGGAACAGGCCCAACCCTTAGTTTCCCTCAAATCACTCTTTGGCAACGACCTCTTGTCACAGTAAGAATAGGGGGACAGCTAAAAGAAGCTCTATTAGATACAGGAGCAGATGATACAGTATTAGAAGACATAAATTTGCCAGGAAAATGGAAACCAAAAATGATAGGGGGAATTGGAGGTTTCATCAAGGTAAAACAATATGATCAGATACTTATAGAAATTTGTGGGAAAAAGGCTATAGGTACAGTATTAGTAGGACCTACACCTGTCAACATAATTGGAAGAAACATGTTGACTCAGATTGGTTGTACTTTAAATTTCCCAATTAGTCCTATTGAGACTGTACCAGTAAAATTAAAGCCAGGAATGGATGGCCCAAAGGTTAAACAATGGCCATTGACAGAAGAGAAAATAAAAGCATTAACAGAAATTTGTACAGAAATGGAAAAGGAAGGAAAAATTTCAAAAATTGGGCCTGAAAATCCATATAATACTCCAATATTTGCAATAAAGAAAAAAGATAGCACTAAGTGGAGAAAATTAGTAGATTTCAGAGAGCTCAATAAAAGAACACAAGACTTTTGGGAAGTTCAATTAGGGATACCGCATCCAGCGGGTCTAAAAAAGAAAAAATCAGTAACAGTACTAGATGTGGGGGACGCATATTTTTCAGTTCCTTTACATGAAGAGTTTAGGAAATATACTGCATTCACCATACCTAGTACAAACAACGAGACACCAGGAGTCAGGTATCAGTACAATGTGCTTCCACAGGGATGGAAAGGATCACCAGCAATATTCCAGAGTAGCATGACAAAAATCTTAGAGCCCTTTAGATCAAAAAATCCAGAAATAGTTATCTATCAATACATGGATGATTTGTATGTAGGATCTGATTTAGAAATAGGGCAGCATAGAGCAAAGATAGAAGAATTAAGAGCTCATCTATTGAGCTGGGGACTTATTACACCAGACAAAAAGCATCAGAAAGAACCTCCATTCCTTTGGATGGGATATGAGCTCCATCCTGACAAGTGGACAGTCCAGCCTATAGAGCTGCCAGAAAAAGACAGCTGGACTGTCAATGATATACAGAAATTAGTGGGGAAACTAAATTGGGCAAGTCAGATTTATGCAGGAATTAAAGTAAAGCAATTATGTAAACTCCTCAGGGGAGCCAAAGCACTAACAGATGTAGTAACATTGACTGAGGAAGCAGAATTAGAATTGGCAGAGAACAGGGAGATTCTAAAAGAACCTGTACATGGGGTATATTATGACCCATCAAAAGACTTAATAGCAGAAATACAGAAACAAGGGCAAGACCAATGGACATATCAAATTTTTCAAGAGCCATTTAAAAATCTAAAAACAGGAAAATATGCAAGAAAAAGGTCTGCTCACACTAATGATGTAAGACAATTAGCAGAAGTGGTGCAAAAGGTGGTCATGGAAAGCATAGTAATATGGGGAAAGACTCCTAAATTTAGACTACCCATACAAAAAGAAACATGGGACACATGGTGGATGGACTATTGGCAGGCTACCTGGATTCTTGAATGGGAATTTGTCAATACCCCTCCTCTAGTAAAATTGTGGTACCAATTAGAGAAAGACCCCATAGCAGGAGCAGAGACTTTCTATGTAGATGGGGCAGCTAATAGGGAAACTAAGCTAGGAAAAGCAGGATATGTTACTGATAAGGGAAGACAAAAGGTAGTTTCCCTAACTGAGACAACAAATCAAAAGACTGAACTACATGCAATCCATTTAGCCTTGCAGGATTCAGGATCAGAAGTAAACATAGTAACAGACTCACAATATGCATTAGGAATCATTCAGGCACAACCAGACAAGAGTGAATCAGAGATAGTCAATCAAATAATAGAGAAGCTAATAGAAAAGGACAAAGTTTACCTGTCATGGGTACCAGCACACAAAGGAATTGGAGGAAATGAACAAGTAGATAAATTAGTCAGTTCCGGAATCAGAAAGGTGCTGTTTTTAGATGGGATAGACAAAGCTCAAGAAGAACATGAAAGATATCATAGCAATTGGAGAACAATGGCTAGTGATTTTAATCTGCCACCTATAGTAGCAAAAGAAATAGTAGCCAGCTGTGATAAATGTCAGCTAAAAGGGGAAGCCATGCATGGACAAGTAGACTGCAGTCCAGGAATATGGCAATTAGATTGCACACATTTAGAAGGGAAAGTAATTGTGGTAGCAGTTCATGTAGCCAGTGGCTATATAGAAGCAGAAGTTATCCCAGCAGAAACAGGACAAGAGACAGCATACTTTCTACTAAAATTAGCAGGAAGATGGCCAGTAAAAATAGTACACACAGACAATGGCAGCAATTTCACCAGCGCTGCAGTTAAAGCAGCCTGTTGGTGGGCAAATATCCAACAGGAATTTGGGATTCCCTACAATCCCCAAAGTCAAGGAGTAGTGGAATCTATGAATAAGGAATTAAAGAAAATCATAGGGCAAGTAAGAGAGCAAGCTGAACACCTTAAAACAGCAGTACAAATGGCAGTATTCATTCACAATTTTAAAAGAAAAGGGGGGATTGGGGGGTACAGTGCAGGGGAAAGAATAATAGACATAATAGCAACAGACATACAAACTAAAGAATTACAAAAACACATTACAAAAATTCAAAATTTTCGGGTTTATTACAGGGACAGCAGAGATCCACTTTGGAAAGGACCAGCAAAACTATTCTGGAAAGGTGAAGGGGCAGTAGTAATACAGGACAATAGTGACATAAAGGTAGTACCAAGAAGAAAAGCAAAGATCATTAGGGATTATGGAAAACAGATGGCAGGCGATGATTGTGTGGCAGGTAGACAGGATGAGGATTAGAACATGGAACAGTTTAGTAAAACATCATATGCATGTCTCCAAGAAAGCTCAAGGATGGTTTTATAGACATCACTATGAAAGCAGGCATCCAAGAGTAAGTTCAGAAGTACACATCCCTCTAGAGAATGATTCTAAATTAGTAATAGTAACCTATTGGGGTCTACATACAGGAGAAAAAGATTGGCATTTGGGTCATGGAGTCTCCATAGAATGGAGGCAGAAAAGGTATAGGACACAAGTAGATCCTGACCTGGCAGACCAACTAATTCATATGCATTATTTTGACTGTTTTTCAGACTCTGCCATAAGGAAAGCCATAGTAGGACAAGTAGTTAGTCCTAAATGTGAATATCAAGCAGGACATAACAAGGTAGGATCTCTACAATATTTAGCACTGAAAGCATTAGTAACACCAAAAAAGACAAAGCCACCTTTGCCTAGTGTTAGGATATTAACAGAAGATAGATGGAACAAGCCCCAGAAGACCAGGGGCCTCAGAGAGAGCCACACAATGAATGGATGTTAGAGCTGTTAGATGATCTTAAGCATGAAGCTGTTAGACATTTTCCTAGGCCATGGCTTCATGGATTAGGACAACATATCTATAACACCTATGGAGATACTTGGGAAGGAGTTGAAGCTATAACAAGAATTCTGCAACAACTACTGTTTGTTCATTTCAGAATTGGGTGCCAACATAGCAGAATAGGCATTATTCCAGGGAGAAGAGGCAGGAATGGACCCGGTAGATCCTAACCTAGAGCCCTGGAATCACCCGGGAAGTCAGCCTACAACTGCTTGCAACAAATGTTACTGTAAAAAGTGTTGTTATCATTGTCAAGTTTGCTTTTTGAACAAAGGCTTAGGCATCTCCTATGGCAGGAAGAAGCGGAGACAGCGACGAGGAGCTCCTCAGAGCAGTAAGGATCATCAAAATTCTATACAAAAGCAGTAAGTATTAGTAATAAGTATATGTAATGTCTCCTTTGGAAATCAGTGCAATAGTAGGGCTGATAGTAGCGCTAATCCTAGCAATAGCTGTGTGGACTATAGTAGGTATAGAATATAAGAAAATAAGAAAACAAAGAAAAATAGATAGGTTGATTGAGAGAATAAGAGAAAGAGCAGAAGACAGTGGCAATGAGAGTGATGGGGATACAGAGGAATTGTCAACACTTATTGACATGGGGGATTATGATCTTGGGGACAATAATATTCTGTAGTGCTGTGGAAAACTTGTGGGTTACTGTCTATTATGGGGTACCTGTGTGGAGAGATGCAGACACCACCTTATTTTGTGCATCAGATGCTAAAGCATATGAGACAGAAAAGCATAATGTCTGGGCTACACATGCTTGTGTACCCACAGACCCCAACCCACAAGAAATACATTTGGACAATGTGACAGAAAAGTTTAACATGTGGAAAAATAACATGGTAGAGCAGATGCACACAGATATAATCAGTCTATGGGATCAAAGCCTAAAGCCATGTGTAAAGTTAACCCCTCTCTGCGTTACTTTACATTGTACAAATGTCACAAGTGTCAACACCACTGGAGACAGGGAAGGCTTAAAAAACTGCTCTTTCAATATGACCACAGAACTAAGGGATAAGAGACAGAAAGTATATTCACTTTTTTATAGACTTGATATAGTACCAATTAATGAAAATCAGGGTAGTGAATATAGATTAATAAATTGTAATACCTCAGCCATTACACAGGCGTGCCCAAAGGTATCCTTTGAGCCAATTCCTATACATTATTGTACCCCAGCTGGTTTTGCGATCCTAAAGTGTAAGGATGAGGGGTTCAATGGGACAGGGTTATGCAAGAATGTCAGCACAGTCCAATGCACACATGGAATCAAGCCAGTAGTATCAACTCAATTGCTGTTGAATGGCAGTCTAGCAGAAAAAAATATAACAATTAGATCTGAAAATATCACAAACAATGCCAAAATTATAATAGTACAACTTGTCCAACCTGTGACAATTAAGTGTATCAGACCTAACAACAATACAAGAAAAAGTATACGTATAGGACCAGGACAAGCATTCTATGCAACAGGTGACATAATAGGGGATATAAGACAAGCACATTGTAATGTCACTAGATCAAGATGGAATAAGACTTTACAAGAGGTAGCTGAAAAATTAAGAACATACTTTGGGAACAAAACAATAATATTTGCTAACTCCTCAGGAGGGGATCTAGAGATCACAACACATAGTTTTAATTGTGGAGGAGAATTTTTCTATTGTAATACATCAGGCTTGTTTAATAGCACTTGGTATGTTAATAGCACTTGGAATGACACTGACAGCACTCAGGAGTCAAATGACACTATAACTCTCCCATGCAGAATAAAGCAAATTATAAATATGTGGCAGAGAGCAGGACAAGCAATGTATGCCCCTCCCATCCCAGGAGTAATAAAGTGTGAATCAAACATTACAGGACTACTATTAACAAGGGATGGTGGAAAGGATAACAATGTAAATGAAACCTTCAGACCTGGAGGAGGAGATATGAGGGACAATTGGAGAAGTGAATTATATAAGTATAAAGTAGTAGAAATTGAACCACTAGGAGTAGCACCTACCAGGGCAAAGAGAAGAGTGGTGGAGAGAGAAAAAAGAGCAGTTGGAATAGGAGCTGTCTTCCTTGGGTTCTTAGGAGCAGCAGGAAGCACTATGGGCGCAACGTCAATAACGCTGACGGTACAGGCCAGACAATTATTGTCTGGCATAGTGCAACAGCAAAACAATTTGCTGAGGGCTATAGAGGCTCAACAACATCTGTTGAAACTCACGGTCTGGGGCATTAAACAGCTCCAGGCAAGAGTCCTGGCTGTGGAAAGATACCTAAGGGATCAACAGCTCCTAGGAATTTGGGGCTGCTCTGGAAAACTCATCTGCACCACTAATGTGCCCTGGAACTCTAGTTGGAGTAATAAATCTCTGGATGAGATATGGAACAACATGACCTGGCTGCAATGGGATAAAGAAATTAACAATTACACACAACTAATATATAGACTAATTGAAGAATCGCAGAACCAGCAGGAAAAGAATGAAAAGGAATTATTGGAGTTGGACAAGTGGGCAAATCTGTGGAGTTGGTTTGACATATCAAATTGGCTGTGGTATATAAAAATATTTATAATAATAGTAGGAGGCTTAATAGGATTAAGAATAGTTTTTGCTGTGCTTTCTGTAATAAATAGAGTTAGGCAGGGATACTCACCTTTGTCATTTCAGACCCATACCCCAAACCCAAGGGGTCTCGACAGGCCCGAAAGAATCGAAGAAGAAGATGGAGAGCAAGGCAGAGGCAGATCGATTCGATTAGTGAGCGGATTCTTAGCACTTGCTTGGGACGACCTACGGAGCCTGTGCCTCTTCAGCTACCACCGCTTGAGAGACTTCATCTTGATTGCTGCGAGGACTGTGGAACTTCTGGGACACAGCAGTCTCAAGGGGCTGAGACTGGGGTGGGAAGGCATCAAGTATCTGTGGAATCTCCTGTCATATTGGGGTCGGGAACTAAAAATTAGTGCTATTAATCTAGTTGATACCATAGCAATAGCAGTAGCTGGCTGGACAGATAGGGTTATAGAAATAGCACAAAGAATTGGTAGAGCTATCCTCCACATACCTGTAAGAATCAGACAGGGCTTAGAAAGGGCTTTGCTATAACATGGGGGGCAAGTGGTCAAAAAGTAGCATAGTGGGATGGCCTGAGATTAGGGAAAGAATGAGACGTGCCCCTCCAGCAGCACCAGGAGTAGGAGCAGTATCTCAAGACTTAGATAAACATGGAGCAGTCACAAGTAAGAATATAAATCACCCTAGTTACGCCTGGCTGGAAGCGCAAGAGGACGAGGATGTAGGCTTTCCAGTCAGGCCACAAGTACCTCTAAGACCAATGACTTACAAGGGAGCTGTGGATCTCAGCCACTTTTTAAAAAAAAAGGGGGGACTGGATGGGTTAGTTTACTCTAGGAAAAGACAAGAAATCCTTGATCTGTGGGTCTATCACACACAAGGCTATTTCCCTGATTGGCAGAATTACACACCAGGGCCAGGGACCAGGTTCCCACTAACATTTGGGTGGTGCTTCAAGCTAGTACCAGTTGATCCAGATGAAGTAGAGAAGGCTACTGAGGGAGAGAACAACAGCCTATTACACCCGATATGTCAACATGGAATGGATGATGAAGAGAGAGAAGTATTAAAGTGGAAGTTTGACAGCCGCCTGGCACTAAAACACAGAGCCCGAGAGCTGCATCCGGAGTGGTACAAGGACTGCTGACACAGAAGTTGTTGACTGGGACTTTCCGCTGGGGACTTTCCAGGGGAGGTGTGGTTTGGGCGGAGTTGGGGAGTGGCCAACCCTCAGATGCTGCATATAAGCAGCTGCTTTTCGCCTGTACTGGGTCTCTCTTGTTAGACCAGATCGAGCCTGGGAGCTCTCTGGCTAGCTGGGGAACCCACTGCTTAAGCCTCAATAAAGCTTGCCTTGAGTGCTTCAAGTAGTGTGTGCCCGTCTGTTGTGTGACTCTGGTAACTAGAGATCCCTCAGACCACTCTAGACGGTGTAAAA
>A1.TZ.97.97TZ03_AF361873_G.ES.00.X558_AF423760
GGACCCTAAAGTGAAAGTAATAGGGACTCGAAAGCGAAAGTTCCAGAGAAGTTCTCTCGACGCAGGACTCGGCTTGCTGAGGTGCACACAGCAAGAGGCGAGAGCGGCGACTGGTGAGTACGCCATTTTTGACTAGCGGAGGCTAGAAGGAGAGAGATGGGTACGAGAGCGTCAGTATTAAGTGGGGGAAAATTAGATTCATGGGAGAAAATTCGGTTAAGGCCAGGGGGAAAGAAAAAATATAGACTAAAACATCTAGTATGGGCAAGCAGGGAGCTGGAAAGATTCGCACTTAACCCTGGCCTTTTAGAAACAACAGAAGGATGTCAACAAATAATGGAACAGTTACAACCAGCTTTCAAGACAGGAACAGAAGAACTTAAATCATTATTTAATACAGTAGCAGTCCTCTATTGCGTACATCAAAGGATAGATGTAAAAGACACCAAGGAAGCTCTAGATAAAATAGAGGAAATGCAAAAGAAGAGCAAGCAAAAGACACAACAGGCAGTAGCTGACACAGGAAGCAGCAGCAAGGTCAGCCAAAATTACCCTATAGTGCAAAATGCACAAGGGCAAATGATACACCAGAACTTGTCACCTAGAACTTTAAATGCATGGGTGAAAGTAATAGAAGAAAAGGCTTTCAGTCCAGAAATAATACCCATGTTCTCAGCATTATCAGACGGAGCCACTCCGTATGATTTAAACACGATGCTGAACATAGTGGGGGGACACCAGGCAGCTATGCAAATGTTAAAAGACACCATCAATGAGGAAGCTGCAGAATGGGACAGAACACATCCAGTACATGCAGGGCCTATTCCACCAGGCCAGATGAGAGAACCAAGGGGAAGTGACATAGCAGGAACCACTAGTACCCTTCAAGAACAAGTACAGTGGATGACAGGCAACCCACCCATCCCAGTGGGAGACATCTATAAAAGATGGATAATTCTGGGACTAAATAAAATAGTAAGAATGTATAGCCCTGTTAGCATTTTGGATATAAGACAAGGGCCAAAAGAGCCTTTCAGAGACTATGTAGATAGGTTCTTTAAAACTCTCAGAGCTGAGCAAGCTACACAGGAGGTAAAAAATTGGATGACAGACACATTACTGGTCCAAAATGCAAATCCAGATTGTAAGTCCATTCTAAGAGCACTAGGACCGGGGGCTACATTAGAAGAAATGATGACAGCATGCCAGGGAGTGGGAGGACCCGGCCATAAGGCAAGGGTCTTAGCTGAAGCAATGAGTCAAGTACAACAGCCAAACATAATGATGCAGAGAGGCAATTTTAGAGGCCAAAAAAGGATTAAGTGTTTTAACTGTGGCAAAGATGGACACCTAGCCAGGAATTGCAGAGCCCCTAGGAAAAAGGGCTGTTGGAAATGTGGGAAGGAGGGACACCAAATGAAAGACTGCACTGAGAGACAGGCTAATTTTTTAGGGAAAATCTGGCCTTCCAGCAAGGGGAGGCCAGGGAATTTTCCTCAGAGCAGACCAGAGCCAACAGCCCCACCAGCAGAGATCTTGGATTGGGGGGAAAGGAGGATGACCTCCCCTCCGAAGCAGGAGCAGAAGGACAAGGAACAGAACCCACCCTTAGTTTCCCTCAAATCACTCTTTGGCAACGACCCATTGTCACAGTAAGAATAGGGGGACAGCTAAAAGAAGCTCTGTTAGATACAGGAGCAGATGATACAGTATTAGAAGACATAAATTTGCCAGGAAAATGGAAACCAAAAATGATAGGGGGAATTGGAGGCTTCATCAAAGTAAAACAATATGATCAAATACTTATAGAAATTTGTGGGAAAAAGGCTATAGGTACAGTATTAGTAGGGCCTACACCTGTCAACATAATTGGAAGAAATATGTTGACCCAGATTGGTTGTACTTTAAATTTCCCAATTAGTCCTATTGAGACTGTACCAGTAAAACTAAAGCCAGGAATGGATGGTCCTAAGGTTAAACAATGGCCATTGACAGAAGAGAAAATAAAAGCATTAACAGAAATTTGTACAGAGATGGAAAAGGAAGGAAAAATTTCAAAAATTGGGCCAGAAAATCCATACAATACCCCAATATTTGCTATAAAGAAAAAAGATAGCACTAAATGGAGGAAATTAGTAGACTTCAGAGAGCTCAATAAAAGAACTCAAGACTTTTGGGAAGTTCAATTGGGAATACCGCATCCAGCGGGCCTAAAAAAGAAAAAATCAGTAACAGTACTGGATGTGGGGGACGCATATTTTTCAGTTCCTTTAGATGAAAGTTTTAGAAAGTATACTGCGTTCACCATACCCAGTACAAACAATGAGCTACCAGGAATAAGGTATCAGTACAATGTGCCTCCACAGGGATGGAAAGGATCACCAGCAATATTCCAGAGTAGCATGACAAAAATCTTAGAGCCATTTAGAGCAAAAAATCCAGAAATAGTTATCTATCAATACATGGATGACTTGTATGTAGGATCTGATTTAGAAATAGGGCAGCATAGAGCAAAAATAGAAGAGTTGAGAGCTCATCTATTGAGCTGGGGATTTACTACCCCAGACAAAAAGCATCAGAAAGAACCGCCATTTCTTTGGATGGGATATGAACTCCATCCTGATAAGTGGACAGTCCAGCCTATAGTGCTGCCAGAAAAGGAAAGCTGGACTGTCAATGATATACAGAAATTAGTGGGAAAACTAAATTGGGCAAGTCAAATTTATCCAGGGATTAAAGTAAAGCAATTGTGCAAGCTCCTCAGGGGAGCCAAAGCACTAACAGATATAGTAACACTGACTGAGGAAGCAGAGTTAGAACTGGCAGAAAACAGGGAGATTCTAAAAGACCCTGTGCATGGAGTGTAGTATGGCCCATCAAAAGACTTAATAGCAGAAATACAGAAACAAGGGCAAGACCAATGGACATACCAAATTTATCAAGAGCCATTTAAAAATCTAAAAACAGGAAAATATGCAAGAAAGAGGTCTGCTCACACTAATGATGTAAAGCAATTAGCAGAAGTGGTACAAAAGGTGGTCCTGGAAAGCATAGTAATATGGGGAAAGACTCCTAAATTTAAACTACCCATACAAAAGGAAACATGGGAAACATGGTGGATGGACTATTGGCAGGCTACCTGGATTCCTGAATGGGAGTTTGTCAATACCCCTCCTCTAGTAAAATTATGGTACCAATTAGAAAAAGACCCCATAGTAGGAGCAGAGACTTTCTATGTAGATGGGGCAGCCAATAGGAAAACTAAGCTAGGAAAAGCAGGGTATGTCACTGACAGAGGAAGACAAAAGGTTGTTTCCTTAACTGAGACAACAAATCAAAAGACTGAACTACATGCAATCTATCTAGCCTTGCAGGATTCAGGACCAGAAGTAAATATAGTTACAGACTCACAATATGCATTAGGAATCATTCAGGCACAACCAGACAGAAGTGAAGCAGAGTTAGTCAATCAGATAATAGAGAAGCTAATAGGAAAGGACAAAGTCTATCCGTCATGGGTACCAGCACACAAAGGAATTGGAGGGAATGAACAAGTGGATAAATTAGTCAGTTCTGGAATCAGGAAGGTACTGTTTTTAGATGGGATAGATAAAGCTCAAGAAGACCATGAAAAATATCACAGCAATTGGAGAGCAATGGCTAGTGATTTTAATCTGCCACCTATAGTAGCAAAGGAAATAGTAGCCAGCTGTGATAAATGTCAACTAAAAGGGGAAGCCATGCATGGACAAGTAGACTGTAGTCCAGGAATGTGGCAATTAGATTGCACACATCTAGAAGGAAAAGTAATCCTGGTAGCAGTTCATGTAGCCAGTGGCTATATAGAAGCAGAAGTTATCCCAGCAGAAACAGGACAGGAGACAGCATACTTTCTGCTAAAATTAGCAGGAAGATGGCCAGTAAAAGTAGTACACACAGACAATGGCAGCAATTTCACCAGCGCTGCATTTAAAGCAGCCTGTTGGTGGGCAAATGTCCAACAGGAATATGGGATCCCCTACAATCCCCAAAGTCAAGGAGTAGTGGAATCTATGAATAAAGAATTAAAGAAAATCATAGGACAAGTAAGAGAGCAAGCTGAACACCTTAAAACAGCAGTACAAATGGCAGTATTCATTCACAATTTTAAAAGAAAAGGGGGGATTGGGGGGTACAGTGCAGGAGAAAGAATAATAGACATAATAGCAACAGACATACAAACTAAAGAATTACAAAAACAAATTACAAAAATTCAAAATTTTCGGGTTTATCACAGGGACAGCAGAGATCCAATTTGGAAAGGACCAGCAAAACTACTCTGGAAAGGTGAAGGGGCGGTAGTAATACAGGACAATAGTGATATAAGGATAGTACCAAGAAGGAAAGCAAAGATCATTAGGGATTATGGAAAACAGATGGCAGGTGATGATTGTGTGGCAGATAGACAGAATGAGGATCAGAACATGGAATAGTTTAGTGAAACATCATATGTATGTCTCAAGGAAAGCTAAAGATTGGTCTTATAGACATCACTTTGAAAGCAGGCATCCAAAAGTAAGTTCAGAAGTACACATCCCACTAGGAGATGCTAGATTAGTAGTAAGAACATATTGGGGTCTGCATCCAGGAGAAAAGGATTGGCACTTGGGTCATGGGGTCTCCATAGAATGGAAGCAAAAAGACTATAGCACACAAATAGATCCTGCTCTGGCAGACCAACTAATTCATCTGAACTATTTTGACTGTTTTTCAGACTCTGCCATAAGGAAAGCCATATTAGGACACGTAGTTAGCCCTAGTTGTGAATATCAAGCAGGACATAACAAGGTAGGATCTCTACAATATTTGGCACTGAAAGCATTAGTAACACCAAAAAAGACAAGGCCACCTTTGCCTAGTGTTAGGAAATTAACAGAGGACAGATGGAACAAGCCCCAGAAGACCAGGGGCCACAGAGGGAGCCACACAATGAATGGACACTAGAACTGTTAGAAGAGCTTAAGCATGAAGCTGTTAGACATTTTCCTAGGCCATGGCTACATGGATTAGGACAACATATCTATAATACCTATGGGGATACTTGGGAAGGGGTTGAAGCTATAATAAGAATTTTGCAACAATTACTGTTTGTTCATTTCAGAATTGGGTGCCAACATAGCAGAATAGGCATTACTCGAGAGAGAAGAGTCAGGGATGGATCCGGTAGATCCTAACCTAGAGCCCTGGAGCCATCCAGGGAGTCAGCCTGCAACTCCTTGTAGCAAGTGCTATTGCAAAAAGTGTTGCTATCATTGCCCAGTTTGCTTTCTGAACAAAGGCTTAGGCATCTCCTATGGCAGGAAGAAGCGGAAACAGCGACGAGGATCTCCTCAGAGCAGTAAGGATCATCAAAATCCTATACCAAAGCAGTAAGTATCAATAGTTAGTATATGTAATATATCCTTTGCAAATCTGTGCAATAGTAGGACTGGTAGTGGCAATAATCCTAGCAATAGTTGTGTGGACTATAGTAGGTATAGAATATAAGAGATTGCTAAAGCAAAGAAAAATACAAAGGATACTTGATAGAATAAGAGAAAGAGCAGAAGACAGTGGAAATGAAAGCGAGGGGGACACAGAGGAGTTGGCAACCCTTGTGGAAATGGGGGATTTTGATCCTTGGGTTGGTGATAATTTGTAATGCCTCAAATGACTTGTGGGTCACAGTCTATTATGGGGTACCTGTGTGGGAGGATGCAAATACCACTCTCTTTTGTGCATCAGATGCTAAAGCATATAAGACAGAAAGGCATAATGTCTGGGCTACGCATGCCTGTGTACCCACAGACCCCAACCCACAAGAAATACATTTGAAAAATGTGACAGAAAACTTTAACATGTGGAAAAATAACATGGTAGAACAAATGCATACAGATATAATCAGTCTATGGGATGAAAGCCTAAAGCCATGTGTAAAGTTAACCCCTCTCTGTGTTACTTTAACTTGCTCTAATGCCAACTTTACTAATGTCAACGTTAGCACCACTGACATGCAAGAAGTAAAAAACTGCTCTTACAATATAACCACAGAATTAAGGGATAAGAAACAGCAAGTATATTCACTCTTTTATAGACTTGATATAGTACAACTGAATGAAAATAAGAAGAGTAGTAGTCAGAATAATAGTCAATATAGATTAATAAATTGTAATACCTCAGCCATTACACAGGCTTGTCCAAAGGTATCCTTTGAGCCAATTCCCATACATTATTGTGCTCCAGCTGGTTTTGCGATTCTAAAGTGTAAGGATAAAGAGTTCAATGGAACAGGGCCATGCAAGAATGTCAGCACAGTACAATGCACACATGGAATCAAGCCAGTAGCATCAACTCAACTGCTGTTAAATGGCAGTCTAGCAGAAAGCAAGACAATGATTAGATCTGAAAATATCACAAACAATATAAAAAACATAATAGTACAGCTCGCCAACCCTGTAAAAATTAATTGTACCAGACCTAACAACAATACAAGGAAAAGTGTACATATAGGACCAGGACAAGCATTCTATGCAACAGGTGCCATAATAGGGGATATAAGACAAGCATATTGTAATGTTAGTGAAGTAGAATGGAATAAAACTTTGCATGAGGTAGTCAAACAATTAAGAACATACTTTAGGAATAAAACAATAATCTTTGACAAATCAGCAGGAGGGGATCCAGAAATTACAACGCATACTTTTAATTGTGGGGGAGAATTTTTCTATTGTAACACATCAGGCCTGTTTAACAGCACTTGGCATAGCAATGCCAGCATACAAGAGCCAAACAGCACAGAGTCAAATGACACTATTATAACTCTCCAATGTAGAATAAAACAAATTATAAATATGTGGCAGAGAACAGGAAAAGCAATATATGCTCCTCCCATCCAAGGAATAATAAGGTGTGAATCAAACATTACAGGACTAATATTAACAAGAGATGGTGGGAGTAATAATAGCACCAATGAAACCTTCAGACCTGGAGGAGGAGATATGAGGGACAATTGGAGAAGTGAATTATATAAGTATAAAGTAGTAAAAATTGAACCACTAGGAGTAGCACCCTCCTGGGCAAGGAGAAGAGTGGTGCAGAGAAAAAAAAGAGCAGTTGGAATAGGAGCTGTCTTCCTTGGGTTCTTAGGAGCAGCTGGAAGCACTATGGGCGCGGCGTCAATAACGCTGACGGTACAGGCCAGACAATTATTGTCTGGCATAGTGCAACAGCAAAGCAATTTGCTGAGGGCTATAGAGGCTCAACAGCATCTGTTGAAACTCACGGTCTGGGGCATTAAACAGCTCCAGGCAAGAGTCCTGGCTGTGGAAAGATACCTAAGGGATCAACAGCTCCTAGGAATTTGGGGCTGCTCTGGAAGACTCATCTGCACCACTAATGTACCCTGGAACTCTACTTGGAGTAATAAATCCTATCATGACATATGGGATAACATGACCTGGCTGCAATGGGATAAAGAAATTAGCAATTACACACAGATAATATATGATCTAATTGAAGAATCGCAGAACCAGCAGGAAAAGAATGAACAAGACCTATTGGCATTGGACAAATGGGCAAATCTGTGGAACTGGTTTGACATAACAAACTGGCTGTGGTATATAAAAATATTTATAATGATAGTAGGAGGCTTAATAGGATTAAGAATAGTTTTTGCAGTGCTTTCTATAATAAATAGAGTCAGGCAGGGATACTCACCTTTGTCATTTCAGACCCATTCCCCAAACCCAAGGGATCTCGACAGGCCCGGAAGAATCGAAGAAGAAGGTGGAGAGCAAGACAGAGACAGATCGATTCGATTAGTGAGCGGATTCTTAGCACTTGCCTGGGACGACCTACGGAGCCTGTGCCTTTTCATCTACCACCGCTTGAGAGACTTAGCCTTGATTGCTGCGAGGACTGTGGAACTTCTGGGACACAACAGTCTCAAGGGGTTGAGACTGGGGTGGGAAGGCCTCAAGTATCTGGGGAATCTCCTGAGATATTGGGGTCGGGAGCTGAAACTTAGTGCTATTAATTTGCTTGATACCATAGCAATAGCAGTAGCTGGCTGGACAGATAGGGTTATAGAAATAGGACAAAGATTTTGTAGAGCTATTTACAACATACCTAGAAGAATCAGACAGGGCTTTGAAAGGGCTTTGCTATAACATGGGGGGCAAGTGGTCAAAAAGTAGCATAGTGGGATGGCCTGAGATTAGGGAAAGAATGAGACGAACTCCTACAGCAGCAACAGGAACAGGAGCAGTATCTCAAGATTTAGATAAACATGGAGCAATCACAAGCAGCAATATAAATCACCCTAGTTGTGTCTGGCTGGAGGCACAAGAGGAAGAGGAGGTAGGGTTTCCAGTCAGGCCACAGGTACCTCTAAGACCAATGACTTACAAGGGAGCGCTTGATCTCAGCCACTTTTTAAAAGAAAAAGGGGGACTGGATGGGCTAATTCATTCCAGAAAGAGACAAGACATCCTTGATTTGTGGGTCTACCACACACAAGGCTACTTCCCTGATTGGCAGAATTATACACCAGGGCCAGGGACCAGGTTCCCACTAACATTTGGATGGTGCTTTAAGCTAGTACCAGTTGAACCAGAAGAAGTAGAGAAGGCTACTGAAGGAGAGAACAACAGCCTCCTACACCCTATATGCCAACATGGAATGGATGACCCAGAGAAAGAAGTCTTAATGTGGAAGTTTGATAGCAGACTGGCATTAACACACAGAGCCCGAGAGCTGCATCCGGAGTTCTACAAAGACTGCTGACACAGAAGTTGCTGACAGGGACTTTCCGCTGGGGACTTTCCAGGGGAGGTGTGGTTTGGGCGGAGTTGGGGAGTGGCTAACCCTCAGATGCTGCATATAAGCAGCTGCTTTTCGCTTGTACTGGGTCTCTCTTGGTAGACCAGATCGAGCCTGGGAGCTCTCTGGCTAGCGAGGGAACCCACTGCTTAAGCCTCAATAAAGCTTGCCTTGAGTGCCCAAAGCAGTGTGTGCCCGTCTGTTGTGT
>A1.TZ.01.A173_AY253305_H.BE.93.VI997_AF190128
GCGAGAGCGTCAATATTAAGTGGGGGAAAATTGGATGCATGGGAGAAAATTCGGTTAAGGCCAGGGGGAAAGAAAAAATATAGACTAAAACACCTAGTATGGGCAAGCAGGGAGCTGGACAGATTCGCACTTAACCCTAGCCTTTTAGAAACAACAGAAGGATGTCAACAGATAATGAACCAGTTACAACCAGCTGTCAAGACAGGAACAGAAGAAATTAAATCATTATTTAATACAGTAGCAACCCTCTATTGTGTACATCAACGGATAGATGTAAAAGATACCAAGGAAGCTCTAGATAAAATAGAGGAAATACAGAATAAGAGCAAGCAAAAGACACAACAGGCAGCAGCTGACACAGGAGACAGCAGCAAGGTCAGCCAAAATTACCCTATAATACAAAATGCACAAGGGCAAATGATACACCAGAACTTGTCACCTAGGACTTTAAATGCATGGGTAAAAGTAATAGAAGAAAAGGCTTTCAGCCCAGAAGTAATACCCATGTTCTCAGCATTATCAGAAGGAGCCACCCCACAAGATTTAAATGTGATGCTGAACATAGTGGGGGGACATCAAGCAGCTATGCAAATGTTAAAAGACACCATCAATGAAGAAGCTGCAGAATGGGACAGGTTACATCCAGTACAGGCAGGGCCTATTCCACCAGGCCAGATAAGAGAACCAAGAGGAAGTGACATAGCAGGAACTACTAGCACCCCTCAAGAACAATTACAATGGATGACAGGTAACCCACCTATCCCAGTGGGAAACATTTATAAAAGGTGGATAATCCTGGGATTAAATAAAATAGTAAGAATGTATAGCCCTGTTAGTATTTTGGATATAAAACAAGGGCCAAAAGAACCCTTCAGAGACTATGTAGATAGGTTCTTTAAGGCTCTCAGAGCTGAGCAAGCTACACAGGATGTAAAAGGTTGGATGACAGAAACCTTATTGGTCCAAAATGCAAATCCAGATTGTAAGTCCATCTTAAAAGCATTAGGATCAGGGGCTACATTAGAAGAAATGATGACAGCATGCCAGGGAGTGGGAGGACCTGGCCATAAAGCAAGGGTTTTAGCTGAGGCAATGAGCCAAGCACAACAGACAAACATAATGATGCAGAGAGGTAATTTTAGGGGCCAGAAAAGGATTAAGTGTTTTAACTGTGGCAAGGAAGGACACCTAGCCAGAAATTGCAGGGCCCCTAGGAAAAAGGGCTGTTGGAAATGTGGGAAAGAGGGACACCAAATGAAAGACTGCACTGAGAGACAGGCTAATTTTTTAGGGAAAATTTGGCCTTCCAGCAAAGGGAGGCCAGGAAATTTTCCCCAGAGCAGACCGGAGCCAACAGCCCCACCAGCAGAGCTCTTTGGGATGGGGGAAGGGATAGCCTCCCTTCCGAAACAGGAGCAGAAGGACAGGGAACAGGTCCCACCCTTAGTTTCCCTCAAATCACTCTTTGGCAACGACCCCTTGTCACAGTAAGAATAGGAGGACAGCTAAAAGAAGCCCTATTAGATACAGGAGCAGATGATACAGTATTAGAAGACATAAATTTGCCAGGAAAATGGAAACCAAAAATGATAGGGGGAATTGGAGGGTTTATCAAGGTAAAACAGTATGATCAGATACCTATAGAAATTTGTGGGAAAAGGGCTATAGGTACAGTATTAGTAGGACCTACACCTGTCAACATAATTGGAAGAAATATGTTGACCCAGATTGGTTGTACTTTAAATTTCCCAATTAGTCCTATTGAGACTGTACCAGTAAAATTAAAGCCAGGAATGGATGGCCCAAAAGTTAAACAATGGCCATTAACAGAAGAAAAAATAAGAGCATTAACAGAAATTTGTATGGAGATGGAAAAGGAAGGAAAAATTTCAAAAATTGGGCCTGAAAATCCATACAATACTCCAATATTTGCTATAAAGAAAAAAGACAGCACTAAATGGAGAAAATTAGTAGATTTCAGAGAGCTCAATAAAAGAACTCAAGACTTTTGGGAAGTTCAGTTAGGAATACCGCATCCAGCGGGCCTAAAAAAGAAAAAATCAGTAACAGTATTAGATGTGGGGGACGCATATTTTTCAGTTCCTCTAGATGAAAGCTTTAGGAAGTATACTGCGTTCACCATACCTAGTACAAACAATGAGACACCAGGAGTCAGGTATCAGTATAATGTGCTTCCACAGGGATGGAAAGGATCACCAGCAATATTCCAGAGTAGCATGACAAAAATCTTAGAGCCCTTTAGATCAAAAAATCCAGAAATAATTATCTATCAATACATGGATGACTTGTATGTAGGATCTGATTTAGAAATAGGGCAGCATAGAACAAAAATAGAAGAGTTGAGAAATCATCTATTGAAATGGGGATTTACTACCCCAGACAAAAAGCATCAGAAAGAACCACCATTTCTTTGGATGGGATATGAACTCCATCCTGACAAGTGGACAGTCCAGCCTATAGTACTGCCAGACAAAGAAAGCTGGACTGTCAATGATATACAGAAATTAGTGGGAAAACTAAATTGGGCAAGTCAAATTTATGCAGGGATTAAAGTAAAGCAATTGTGTAAGCTCCTCAGGGGAGCCAAAGCACTAACAGATATAGTAACAATGACTGAGGAAGCAGAATTAGAATTGGCAGAAAACAGGGAAATTCTAAAAGAACCTGTGCATGGAGTGTACTATGATCCATCAAAAGACTTAATAGTAGAAATACAGAAACAAGGGCAAGACCAATGGACATACCAAATTTATCAAGAGCCATTTAAAAATCTAAAAACAGGAAAATATGCAAGAAAGAGGTCTGCTCACACTAATGATGTAAAACAATTAGCAGAAGTGGTGCAAAAGGTGGTCACAGAAAGCATAGTAATATGGGGAAAGACTCCTAAATTTAAACTACCCATACAAAAGGAAACATGGGAAACATGGTGGATGGACTATTGGCAGGCTACCTGGATCCCTGAATGGGAATTTGTCAATACCCCTCCTCTAGTAAAATTATGGTACCAGTTAGAGAAAGACCCCATAATAGGAGCAGAGACTTTCTATGTAGATGGGGCAGCCAATAGGGAGACTAAGCTAGGAAGAGCAGGGTATGTCACTGATAGAGGAAGACAAAAGGTTGTTTCCCTAACTGAGACAACAAATCAGAAGACTGAACTACATGCAATCCAGCTAGCCTTGCAGGATTCAGGACCAGAAGTAAACATAGTAACAGACTCACAATATGCATTAGGAATCATTCAGGCACAACCAGACAGAAGTGACTCAGAGATAGTCAATCAAATAATAGAGAAGCTAATAGAAAAAGACAAAGTATACCTGTCATGGGTACCAGCACACAAAGGAATTGGAGGGAATGAACAGGTAGATAAATTAGTCAGTTCTGGAATCAGGAAGGTGCTATTTTTAGATGGGATAGATAAAGCTCAAGAAGACCATGAAAAATATCACAGCAATTGGAGAGCAATGGCTAGTGATTTTAATCTGCCACCTATAGTAGCAAAAGAAATAGTAGCCAGCTGTGATAAATGTCAACTAAAAGGGGAAGCAGTGCATGGACAAGTAGATTGTAGTCCAGGGATGTGGCAATTAGATTGTACACATCTAGAAGGAAAAGTAATTCTGGTAGCAGTCCATGTAGCCAGTGGATATATAGAAGCAGAAGTTATCCCAGCAGAAACAGGACCGGAGACAGCATACTTTCTGCTAAAATTAGCAGGAAGATGGCCAGTAAAAGTAGTACACACAGACAATGGCAGCAATTTCACCAGCGCTGCATTTAAAGCAGCCTGTTGGTGGGCAAGTGTCCAACAGGAATATGGGATTCCATACAATCCCCAAAGTCAAGGAGTAGTGGAATCTATGAATAAGGAATTAAAGAAAATCATAGGACAAGTAAGAGAGCAAGCTGAACACCTTAAAACAGCAGTACAAATGGCAGTATTCATTCACAATTTTAAAAGAAAAGGGGGGATTGGGGGGTACAGTGCAGGGGAAAGAATAATAGACATAATAGCAACAGACATACAAACTAAAGAATTACAAAAACAAATTACAAAAATTCAAAATTTTCGGGTTTATTACAGGGACAGCAGAGATCCAATTTGGAAAGGACCAGCAAAACTACTCTGGAAAGGTGAAGGGGCAGTAGTAATACAAGATAATAGTGATATAAAGGTAGTACCAAGAAGAAAAGCAAAGATCATTAGGGATTATGGAAAACAGATGGCAGGTGATGATTGTGTGGCAGGTAGACAGGATGAGGATTAGAACATGGAACAGTTTAGTAAAACATCATATGTATGTCTCAAGGAAAGCTAAAGATTGGTTTTATAGACATCACTATGAAAGCAGACATCCAAAAGTAAGTTCAGAAGTACACATCCCACTAGGGGATGCTAGATTAGTGGTACGAACATATTGGGGTCTGCAGACAGGAGAAAAAGATTGGCACTTGGGTCATGGGGTCTCCATAGAATGGAGGCTAAAAAGATATAGCACACAGATAGATCCTGACCTGGCAGACCAACTAATTCATCTGCATTACTTTGACTGTTTTTCAGACTCTGCCATAAGGAAAGCCATATTAGGACAAGTAGTTAGACCTAGGTGTGACTATCAAGCAGGACATAACAAGGTAGGATCTCTACAATATTTGGCACTGAAAGCATTAGTAACACCAAAAAAGATAAAGCCACCTTTGCCTAGTGTTAGGAAATTAGCAGAGGATAGATGGAACAAGCCCCAGAAGATCAGGGGCCCCAGAGGGAGCCATACAATGAATGGACACTAGAACTGTTAGAAGAGCTTAAGCATGAAGCTGTTAGACATTTTCCTAGGCCATGGCTACATGGATTAGGACAACATGTCTATGAAACCTATGGGGACACTTGGGAAGGAGTTGAAGCTATAATAAGAATATTGCAACAACTACTGTTTGTGCATTTCAGAATTGGGTGCCAACATAGCAGAATAGGCATTATTCGAGGAGGGAGAAGAGTCAGGAATGGATCCAGTAGATCCTAACCTAGAGCCCTGGAATCACCCAGGAAGTCAGCCTGCAACTGCTTGTAGCCCGTGTTACTGCAAAAAGTGTTGCTATCATTGTCAAGTTTGCTTTCTGAACAAAGGCTTAGGCATCTCCTATGGCAGGAAGAAGCGGAAACAGCGACGAAGACCTCCTCAAAGCAGTAAGGATCATCAAAATCCTATACCAAAGCAGTAAGTAAAATATATGTAATGACTCCTTTGGAAATTTGGGCAATAGTAGGACTGGTAGTGGCGCTAATCATAGTAATAGTTGTGTGGACTATAGTAGGCATAGAATATAAGAGATTGTTAAAACAAAGGAAAATAGACAGGTTGATTGAGAGAATAAGAGAAAGAGCAGAAGACAGTGGCAATGAGAGTGAAGGGGATACAGAGGAACTCTCAGCACTTCTTGAGATGGGGAACTATGATCTTGGGATTGATAATAATCTGTAGTGCTGCAGACAACTTATGGGTTACAGTCTACTATGGGGTACCAGTGTGGAAAGATGCAGAGACCACCTTGTTTTGTGCATCAGATGCGAAAGCATATGATGCAGAAGTGCATAATGTCTGGGCTACACATGCCTGTGTACCTACAGACCCCAACCCACAAGAAATACATTTGGAAAATGTGACAGAAGAGTTTAACATGTGGAAAAATAACATGGTAGAGCAGATGCATACAGATATAATCAGTCTATGGGACCAAAGCTTAAAGCCATGTGTAAAGTTAACCCCTCTCTGCGTTACTTTAAATTGTAGCAATGTCAGTAATAATACTGACAGTGACAACAGTGACAATGCCACCAATTCCACCATCACCAGGGAAATGATTGGAGAAATAAAAAACTGCTCTTTCAATATAACCACAGAAATAAGGGACAAGAAACAGAAAGTATATTCACTTTTTTATAAACTTGATGTAGTGGAAATTAGTAATAGTAATAGTAGTCAGTATAGATTAATAAACTGTAATACCTCAGCCATTACCCAGGCTTGTCCAAAGGTAACCTTTGAGCCAATTCCCATACACTATTGTGCTCCAGCTGGTTTTGCGATTCTAAAGTGTAAGAATAAAACGTTCAATGGAACAGGGCCATGCAATAATGTCAGCTCAGTACAATGCACACATGGAATCAGGCCAGTAGTATCAACTCAACTGCTGTTAAATGGCAGTCTAGCAGAAGGAGAGATACAAATTAGATCTGAGAATATCACAAACAATGCCAAAAATATAATAGTACAATTTACCGAGCCTGTACAAATTATTTGCATCAGACCTAACAACAATACAAGAAAAAGGGTACATATAGGACCAGGACAGACATTCTATGCAACAGACATAATAGGGAATATAAGACAAGCATATTGTACTGTCAATAGAACAGAATGGAATACAACTTTGCAAAAGGTAGGCAAACAATTAAGAGATTTATACTTTAATAACAAAACAATAATTTTTACTAGCTCCTCAGGAGGGGATCTAGAAATTACAACACATAGTTTTAATTGTGGGGGAGAATTTTTCTATTGTAACACATCAGGCCTGTTTAATGGCCTGTTTAATGGCACCTGGAATGGCAATCACACAAACAGCACGGAGTTAAATAGCACTATAATTCTCCAATGCAAAATAAAGCAAATTATAAATATGTGGCAGAGAGCAGGACAAGCAATATATGCCCCTCCCATCCAAGGAGTAATAAAGTGTGTATCAAATATTACAGGATTAATCCTGACTTATGACGAAGATAAGGGAAATAATGATAATGTTACCTTCAGACCTGGAGGAGGAGATATGAGGGACAATTGGAGAAGTGAATTATATAAATATAAAGTAGTAAAAATTGAACCACTGGGAGTAGCACCCACCGAGGCAAGGAGAAGAGTGGTGGAGAGAGAAAAAAGAGCTGTGGGACTGGGAGCTGTCTTCATTGGGTTCTTAGGAGCAGCAGGAAGCACTATGGGCGCGGCGTCAGTAACGCTGACGGTACAGGCCAGACAATTATTGTCTGGCATAGTGCAACAGCAAAGCAATTTGCTGAGGGCTATAGAGGCTCAACAGCATCTGTTGAAACTCACGGTCTGGGGCATTAAACAGCTCCAGGCAAGAGTCCTGGCTGTGGAAAGATACCTAAAGGATCAACAGCTCCTAGGAATTTGGGGCTGCTCTGGAAAACTCATCTGCACCACTAATGTGCCCTGGAATTCTAGTTGGAGTAATAAATCCCATGATGACATATGGAATAACATGACCTGGCTGCAATGGGATAAAGAGATTAGCAATTACACACAGCTAATATATAATCTAATTGAAGAATCACAGAACCAGCAGGAAAAGAATGAACAAGAGTTATTGGCATTGGACAAGTGGGCAAGTCTGTGGAATTGGTTTGATATATCAAATTGGCTGTGGTATATAAGGATATTTATAATGATAGTAGGAGGCTTAATAGGATTAAGAATAATTTTTGCAGTGCTTTCTATAATAAATAGAGTTAGGCAGGGATACTCACCTTTGTCATTTCAGACCCATACCCCAAACCCAAGGGATCTCGACAGGCCCGGAAGAATCGAAGAAGAAGGTGGAGAGCAAGGCAGAGACAGATCGATTCGATTAGTGAGCGGATTCTTAGCACTTGCCTGGGACGATCTCCGGAGCCTGTGCCTCTTCAGCTACCACCGCTTGAGAGACTTCACCTTGATTGTTGCGAGGACTGTGGAACTTCTGGGACACAACAGTCTCAAGGGGTTGAGACTGGGGTGGGAGGGCCTCAAGTATCTGGGGAATCTCCTGGTGTATTGGGGACAGGAACTAAAAAGTAGTGCTATTAATTTGCTTGATACCATAGCAATAGCAGTAGCTGGCTGGACAGATAGGGTTATAGAAATAGGACAAAGAATTTGTAGAGCTATTTACAACATACCTAGAAGAATCAGACAGGGCTTAGAAAGGGCTTTGCTATAATATGGGGGGCAAGTGGTCAAAAAGTAGCATAGTGGGATGGCCTGAGATTAGGGAAAGAATAAGACGAACCCCTCCAGCAGTAAGAGGAGTAGGAGCAGTATCTCAAGATCTAGATAAACATGGAGCAATCACAAACAGCAATATAAATCACCCTAGTTGTGTCTGGCTGGAAGCACAAGAGGATGAGGATGTGGGCTTTCCAGTCAGGCCACAAGTACCTCTAAGACCAATGACTTACAAGGCAGCTTTTGATCTCAGCTACTTTTTAAATCACTCCAGGAGGAGACAAGACATCCTTGATCTGTGGGTGTACCACACACAGGGCTACTTCCCTGATTGGCAGTGTTACACACCAGGGCCAGGGATCAGGTACCCACTAACGTTTGGATGGTGCTTCAAGCTAGTTCCAGTTGATCCAGAAGAAGTAGAGAAGGCTACTGAAGGAGAGAACACCCGCCTATTACACCCTATAAGCCAGCATGGAATGGATGATGATGAGAGAGAAACATTAAGGTGGACATTTGACAGCAAGCTGGCATTAAAACACATAGCCAGAGAGCTGCATCCGGACTTCTACAAAGACTGCTGACACAGAAGTTGCTGACAGGGACTTTCCGCTGGGGACTTTCCAGGGGAGGTGTGGTTTGGGCGGAGTTGGGGAGTGGCTAACCCTCAGATGCTGCATATAAGCAGCTGCTTTTCGCCTGTACTGGGTCTCTCTTGGTAGACCAGATTGAGCCT
>A1.KE.99.KSM4021_AF457075_J.SE.94.SE7022_AF082395
GCGAGAGCGTCAGTATTAAGCGGGGGAAAATTAGATTCATGGGAGAAGATTCGGTTAAGGCCAGGGGGAAAGAAAAAATATAGACTGAAACATTTAGTATGGGCAAGCAGGGAGCTGGAAAGATTTGCACTTAACCCCAGCCTTTTAGAAACAGCAGAAGGATGTCAGCAAATAATGGATCGGTTACAACCAGCTCTCAAGACAGGAACAGAGGAACTTAGATCATTATTTAATACAGTGGCAACCCTCTATTGTGTACACCACAGAATAGATGTAAAAGACACCAAGGAAGCTCTAGATAAAATAGAGGAAATGCAAAATAAGAGCAAGCAAAAGCCACAACAGGCAGCCGCTGATACAGGAAACAGCAGCAAGGTTAGCCAAAATTACCCTATAGTGCAAAATGCACAGGGACAAATGGTACACCAGACCTTGTCACCTAGGACTTTGAATGCATGGGTAAAAGTAATAGAAGAAAAGGCTTTCAGCCCAGAAGTAATACCCATGTTCTCAGCATTATCAGAAGGAGCCACCCCACAAGATTTAAATATGATGCTGAACATAGTGGGGGGACACCAGGCAGCTATGCAAATGTTAAAAGATACCATCAATGAGGAAGCTGCAGAATGGGACAGGTTACATCCAGTACATGCAGGGCCCGTTCCACCAGGCCAGATGAGAGAACCAAGGGGAAGTGACATAGCAGGAACTACTAGTACCCCTCAAGAACAAATAGGATGGATGACAAGCAACCCACCTATCCCAGTAGGAGACATCTATAAAAGATGGATAATACTGGGATTAAATAAAATAGTAAGAATGTATAGCCCTGTTAGCATTTTGGATATAAAACAAGGGCCAAAAGAACCCTTCAGAGATTATGTAGATAGGTTCTTTAAAACTCTTAGAGCTGAGCAAGCTACACAGGATGTAAAAAATTGGATGACAGACACATTACTGGTCCAAAATGCAAATCCAGATTGTAGGTCTATTTTAAGAGCATTAGGAGCAGGGGCTACATTAGAAGAAATGATGACAGCATGCCAGGGAGTGGGAGGACCCAGCCATAAAGCAAGGATTTTGGCTGAGGCAATGAGTCAGGCACAACATACAAACATAATGATGATGCAGAAAGGCAATTTTAGGGGTCCGAAAAGGATCAAGTGTTTCAACTGTGGCAAAGAAGGACACCTAGCCAGAAATTGCAGGGCCCCTAGGAAAAAGGGCTGTTGGAAATGTGGGAGGGAAGGACACCAAATGAAAGACTGCACTGAAAGACAGGCTAATTTTTTAGGGAAAATTTGGCCTTCCAACAAGGGGAGGCCAGGAAATTTTCCCCAGAACAGATTGGAGCCAACAGCCCCACCAGCAGAGATCTGCGGGATGGGGGAAGGGATAGCCTCCTCTCCGAAGCAGGAGCAGAAGGACAAGGAACAGGCTACACCTTCAATTTCCCTCAAATCACTCTTTGGCAACGACCTCTTGTCACAGTAAGAATAGGGGGACAGCTAAGAGAAGCTCTACTAGATACAGGAGCAGATGACACAGTATTAGAAGACATAGATTTGCCAGGAAAATGGAAACCAAAAATGATAGGGGGAATTGGAGGTTTCATCAAGGTAAAACAATATGATCAGATACTTATAGAAATTTGTGGAAAAAAGGCTATAGGTACAGTATTAGTAGGACCTACACCTGTCAACATAATTGGAAGAAACATGTTGACCCAGATTGGCTGTACCTTAAATTTCCCAATTAGTCCTATTGAGACTGTACCAGTACAATTAAAGCCAGGAATGGATGGCCCAAAGGTTAAACAGTGGCCATTAACAGAAGAAAAAATAAAAGCATTAACAGAAATTTGTATGGAAATGGAAAAGGAAGGAAAAATTTCAAAAATTGGGCCTGAAAATCCATACAATACTCCAATATTTGCGATAAAGAAAAAAGATAGCACCAAATGGAGGAAATTAGTAGATTTCAGAGAGCTTAATAAAAGAACACAAGACTTTTGGGAAGTCCAATTAGGAATACCGCACCCAGCGGGCCTAAAAAAGAAAAAATCAGTAACAGTACTAGATGTGGGGGATGCATATTTTTCAGTCCCTTTATATGAAGATTTCAGGAAGTATACTGCATTCACTATACCTAGTATAAACAATGAGACACCAGGGATCAGATATCAGTACAACGTGCTACCACAGGGATGGAAAGGATCACCAGCAATATTTCAGTGTAGCATGACAAAAATCTTAAAACCTTTTAGAGAAAGAAACCCAGAAATAGTTATCTACCAATACATGGATGATTTGTATGTAGGATCTGATTTAGAAATAGGGCAGCATAGAGCAAAAATAGAAGAATTAAGAGCTCATCTATTGAGATGGGGATTAACTACACCAGACAAAAAGCATCAGAAAGAACCCCCATTCCTTTGGATGGGATATGAGCTCCATCCTGACAAGTGGACAGTCCAGCCTATAATGCTGCCAGAAAAAGACAGCTGGACTATCAATGATATACAGAAATTAGTGGGAAAACTAAATTGGGCAAGTCAAATTTATCCAGGGATTAAAGTAAAGCAATTGTGTAAACTCCTCAGGGGAGCCAAAGCACTAACAGATATAGTGACATTGACTGAGGAAGCAGAATTAGAATTGGCAGAGAACAGGGAGATTCTAAAAGAACCTGTGCATGGAGTATATTATGACCCATCAAAAGACTTAATAGCAGAAATACAGAAACAAGGGCAAGACCAATGGACATACCAAATTTATCAAGAGCCATTTAAAAATTTAAAAACAGGAAAATATGCAAGAAAAAGGGCTGCCCACACTAATGATGTAAGACAATTAGCAGAAGTGGTGCAAAAGGTGGTCATGGAAAGCATAGTAATATGGGGAAAGGCTCCTAGATTTAAACTACCCATACAAAAAGAGACATGGGAAACATGGTGGATGGACTATTGGCAGGCTACCTGGATTCCTGAATGGGAATTTGTCAATACCCCTCCTTTAGTAAAACTGTGGTACCAATTAGAAAAAGACCCCATAGCAGGAGCAGAGACATTCTATGTAGATGGGGCAGCCAATAGGGAGACTAAGCTAGGAAAAGCAGGGTATGTCACTGACAGGGGAAGACAAAAGGTTGTTCCCCTAACTGAGACAACAAATCAAAAGACTGAACTACATGCAATCTTTCTAGCCTTGCAGGATTCAGGATCAGAAGTAAACATAGTAACAGACTCACAGTATGCACTAGGAATCATTCAGGCACAACCAGACAGGAGTGAATCAGAGTTAGTCAATCAAATAATAGAGAAGCTAATAGAAAAGGACAGAGTCTACCTGTCATGGGTACCGGCACACAAAGGAATTGGAGGAAATGAACAAGTAGATAAATTAGTCAGTTCCGGAATCAGAAAGGTGCTGTTTTTAGATGGGATAGATAAAGCTCAAGAAGAACATGAAAGATATCACAGCAATTGGAAAGCAATGGCTAGTGATTTTAACCTGCCACCTGTAGTAGCAAAGGAAATAGTAGCCAGCTGTGATAAATGTCAACTAAAAGGGGAAGCCATACATGGACAAGTAGACTGCAGTCCAGGGATATGGCAATTAGATTGCACACATCTAGAAGGAAAAGTAATTCTGGTAGCAGTTCATGTAGCCAGTGGTTATATAGAAGCAGAAGTTATCCCAGCAGAAACAGGACAGGAGACAGCATACTTTCTACTAAAATTAGCAGGAAGATGGCCAGTAAAAGTAGTACACACAGACAATGGCAGCAATTTCACCAGTGCTGCAGTTAAAGCAGCCTGTTGGTGGGCAGGTATCCAACAAGAATTTGGGATTCCCTACAATCCCCAAAGTCAAGGAGTAGTGGAATCTATGAATAAGGAATTAAAGAAAATCATAGGGCAGGTAAGAGAGCAAGCTGAACACCTTAGAACAGCAGTACAAATGGCAGTATTCATTCACAATTTTAAAAGAAAAGGGGGGATTGGAGGGTACAGTGCAGGGGAAAGAATAATAGACATAATAGCAACAGACATACAAACTAAAGAATTACAAAAACAAATTACAAAAATTCAAAATTTTCGGGTTTATTACAGGGACAGCAGAGATCCAGTTTGGAAAGGACCAGCAAAACTACTCTGGAAAGGTGAAGGGGCAGTAGTAATACAGGATAATAGTGATATAAAGGTAGTACCAAGAAGGAAAGCAAAGATCATAAGGGACTATGGAAAACAGATGGCAGGTGATGATTGTGTGGCAGGTAGACAGGATGAGGATTAGAACATGGAACAGTTTAGTAAAACATCACATGTATGTCTCAAAGAAAGCTAATAAGTGGGTTTATAGACATCACTATGAGAGCAGGCATCCAAAAGTAAGTTCAGAAGTACACATCCCACTAGGGGATGCTAGATTAGTAGTAAGAACATATTGGGGTCTACATACAGGAGAAAAAGACTGGCACTTGGGTCATGGGGTCTCCATAGAATGGAGGCTAAAAAGATATAGCACACAAATAGATCCTGACCAGGCAGACCAACTAATTCATCTGCATTATTTTGACTGTTTTTCAGACTCTGCCATAAGGAAAGCCATAGTAGGACAAGTAGTTAGCCCTAGGTGTGACTACCAGACAGGACATAACCAGGTAGGATCTCTACAATACCTAGCACTGAAAGCATTAGTAACACCAACAAAAAGAAGGCCGCCTTTGCCTAGTGTTAGGAAATTAACAGAGGATAGATGGAACAAGCCCCAGAAGACCAGGGGCCCCAGAGAGAGCCATACAATGAATGGATGTTAGAGCTGTTAGAAGATCTTAAGCATGAAGCAGTTAGACATTTTCCTAGGCCATGGCTTCATGGATTAGGGCAACATATCTATGACACCTATGGGGATACTTGGGAAGGAGTTGAAGCTATAACAAGAACTCTGCAACAACTACTGTTTGTTCATTTCAGAATTGGGTGCCAACATAGCAGAATAGGCATTATTCCAGGGAGAAGAGGCAGGAATGGATCCAGTAGACCCTAACCTAGAGCCCTGGAACCACCCGGGAAGTCAGCCTACAACACCTTGTAGCAAGTGTTACTGTAAAAAGTGTTGCTATCATTGCCCAGTTTGCTTTTTGAACAAAGGCTTAGGCATCTCCTATGGCAGGAAGAAGCGGAGACAGCGACGAGGAACTCCTCAGGATAATAAGGACCATCAAAATCCTGTACGACAGCAGTAAGTAGTAGTAATTAGTACATGTAATGTTGCCTCCTTTACACATCTGTACAATAGTAGGACTGACAGTAGCGCTAATCCTAGCAATAGTTGTGTGGACTATAGTAGGTATAGAAATTAAGAAAGTGCTAAAACAAAGAAAATTAGACAGGTTAATTGAAAGAATAAGAGAAAGAGCAGAAGACAGTGGCAATGAAAGTGAGGGTGATACAGAGGAATTGTCAGCACTTGTTGAGATGGGGGACTATGATCTTGGGGATGATATTAATCTGTAGTGCTGCAGGAAACTTGTGGGTTACTGTCTACTATGGGGTACCTGTGTGGAAAGATGCAGAGACCACCCTATTTTGTGCATCAGATGCTAAAGCATATGAGACAGAAAAACATAATGTCTGGGCTACACATGCCTGTGTACCCACAGACCCCAACCCACAAGAAATACATTTGGAAAATGTGACAGAAGAATTTAACATGTGGAAAAATAAAATGGTAGAGCAGATGCATACAGATATAATCAGTCTATGGGATCAAAGCCTAAAGCCATGTGTAAAATTAACCCCTCTCTGCGTTACTTTAAACTGTAGTGATGTCACAACAAACAATGTCACAACAAATGTCACAGAGGGCGGGGAGGACATGAGAAACTGCTCTTTCAATATGACTACAGAATTAAGGGATAAACAGAAGAAGGTATATTCACTTTTTTATAGACTTGATGTAGTACAAATTAATGGAAGTCAAAGTAATAGTAATTACAGTGAGTATAGACTAATAAATTGTAATACCTCAGCCATTACACAGGCCTGCCCAAAGGTATCCTTTGAGCCAATTCCCATACATTATTGTGCTCCAGCTGGTTTTGCGATCCTAAAGTGTAATGATGAGAATTTCAATGGAACAGGGCCATGCAAAAAGGTCAGCACAGTACAATGTACACATGGAATCAAGCCAGTAGTATCAACTCAACTGCTGTTAAATGGCAGTCTAGCAGCAGGAAATAAAACAAAAATTAGATCTGAAAATATCACAAACAATGCCAAAAATATAATAGTACAATTTACCGAGCCTGTGGAAATTAATTGTATCAGACCTAACAACAATACAAGAAAAAGTATGCGTATAGGACCAGGACAAGCATTCTATGCAACAGGGGATATAGTAGGGGATATAAGAAAAGCATATTGTAATATCTCTGAATCAAAATGGAATATAACTTTACAAAAGGTAGGTGAACAATTAAGAACATACTTTGTGAACAAAGCAATAATATTTACTAACTCCTCAGGAGGGGATCTAGAAATCACAACACATAGTTTTAATTGTGGAGGAGAATTTTTCTATTGTGATACATCAAGCCTGTTTAATGGCACTTTAGAGGCCAATGCCACCGTGCAAAACTTCAATAGCACAGAGCATATAATTCTCCCATGCAAAATAAAGCAAATTATAAATATGTGGCAGAGAGCAGGACAAGCAATGTATGCCCCTCCCATCCAAGGAGTAATAAATTGTGTGTCAAACATTACAGGACTAATATTAACAAGAGATGGTGGGGATAATAATAATAGTACAAATGAAACATTCAGACCTGGAGGAGGAGATATGAGGGACAATTGGAGAAGTGAATTATATAAGTATAAAGTAGTAAAAATTGAACCACTAGGAGTAGCACCAACCAAGGCAAAAAGAAGAGTGGTGGAGAGAGAAAAAAGAGCAGTAATTGGACTGGGAGCTGTTTTCATTGGGTTCTTAGGAGCAGCAGGAAGCACTATGGGCGCGGCGTCAATAACGCTGACGGTACAGGCCAGACAATTATTGTCTGGTATAGTGCAACAGCAAAGCAATTTGCTGAGGGCTATAGAGGCTCAACAACATCTGTTGAAACTCACGGTCTGGGGCATTAAACAGCTCCAGGCAAGAGTCCTGGCTGTGGAAAGATACCTAAGGGATCAACAGCTCCTAGGAATTTGGGGCTGCTCTGGAAAACTCATCTGCACCACTAATGTGCCTTGGAACTCTAGTTGGAGTAATAAATCTGAAAAGGAAATATGGGATAACATGACCTGGCTGCAATGGGATAAAGAAATTGGCAATTACACAGACATAATATATAGGCTAATTGAAGAATCGCAGAATCAGCAGGAAAAGAATGAACAAGACTTATTGGCATTGGACAAGTGGGCAGGCCTGTGGAATTGGTTTAGCATAACAAACTGGCTGTGGTATATAAGAATATTTATAATGATAGTAGGAGGCTTAATAGGATTAAGAATAGTTTTTGCTGTGCTTTCTATAATAAATAGAGTTAGGCAGGGGTACTCACCTTTGTCATTTCAGACCCACACCCCAAACCCACGGGGTCTCGACAGGCCCGGAAGAATCGAAGAAGAAGGTGGAGAGCAAGACAGAGACAGATCGATTCGCTTAGTGAGCGGATTCTTAGCACTTGCCTGGGACGACCTGCGGAGCTTGTGCCTCTTCAGCTACCACCGCTTGAGAGACTTCATCTTGATTGCAGCGAGGACTGTGGAACTTCTGGGACACAGCAGTCTCAAGGGGTTGAGACTGGGGTGGGAAGGCCTCAAGTATCTGTGGAATCTCCTGTTATATTGGGGTCGGGAACTAAAAACTAGTGCTGTTAATTTGATTGATACCATAGCAATAGTAGTAGCTGGCTGGACAGATAGGGTTATAGAAATAGGACAAGTAGTAGGTAGAGCTATTCTCCACATACCTAGAAGAATCAGACAGGGCCTCGAAAGAATTTTGCTATAACATGGGTGGCAAGTGGTCAAAAAGCAGCATAGTGGGATGGCCTGAGGTTAGGGAAAGAATAAGACGTGCATCTCCAGCAGCACCAGGAGTAGGAGCAGTATCTCAAGATTTAGATAAACATGGAGCAGTTACAAATAGTAATATAAACCACCCCAGTTGTGTCTGGCTGGAAGCGCAAGAGGAAGAGGATGTAGGCTTTCCGGTCAGGCCACAAGTACCTCTAAGACCAATGACTTACAAGGGAGCTGTGGATCTCAGCCACTTTTTAAAAGAAAATGGGGGACTGGAAGGGTTAATTTACTCCAGAAAAAGACAAGAAATCCTTGATTTGTGGGTCTACAACACACAGGGCTATTTCCCTGATTGGCAGAGTTACACACCAGGGCCTGGGATCAGATACCCACTAACATTTGGATGGTGCTTCAAGCTAGTACCAGTTGATCCAGATGAAGTAGAAAAGGCTACTGAAGGAGAGACCAACAGATTGTTACACCCGATATGTCAACATGGAATGGATGATGAGGAGAGAGAAGTATTAAAGTGGAAGTTTGACAGCCGCCTGGCATTAATACACACAGCTCGAGTGATGCACCCGGAGTTCTACAAAGACTGCTGACACAGAAGTTGCTGACAGGGACTTTCCGCTGGGGACTTTCCAGGGGAGGTGTGGTTTGGGCGGAGTTGGGGAGTGGCTAACCCTCAGATGCTGCATATAAGCAGCTGCTTTTCGCCTGTACTGGGTCTCTCTTGTTAGACCAGATCGAGCCTGGGAGCTCTCTGGCTAGCAAGGAACCCACTGCT
>A1.RW.93.93RW_024_AY713406_K.CD.97.EQTB11C_AJ249235
GCGAGAGCGTCAGTATTAAGCGGGGGAAAATTAGATGCATGGGAGAAAATTCGGTTAAGGCCAGGGGGAAAGAAAAAATATAGAATGAAACATCTAGTGTGGGCAAGCAGGGAGCTGGAAAGATTTGCACTTAACCCTAGCCTTTTAGAATCAACAGAAGGATGTCAACAAATAATAGAACAGTTACAACCAGCTCTTAAGACAGGAACAGAAGAAATTAAATCATTATATAATACAGTAGCAACCCTCTACTGCGTACATCGAAGGATAGATGTAAAAGACACCAAGGAAGCTCTAGATAAAGTAGAGGAGATACAAAATAAGAGCAAGCAAAAGACTCAACAGGCAGCAGCTGACACAGGAAACAGCAGCAGGAGCGTCAGCCAAAATTACCCTATAGTGCAAAATGCACAAGGGCAAATGGTACACCAGCCCTTATCACCTAGGACTTTGAATGCATGGGTCAAAGTAATAGAAGAAAAGGCTTTCAGCCCAGAAGTAATACCCATGTTCTCAGCACTATCAGAAGGAGCCACCCCACAAGATTTAAATATGATGCTGAATGTAGTGGGGGGACACCAGGCAGCTATGCAAATGTTAAAAGATACCATCAATGAGGAAGCTGCAGAATGGGACAGGTTACATCCAGTACATGCAGGGCCTATTCCACCAGGTCAGATGAGAGAACCAAGGGGAAGTGACATAGCAGGAACTACTAGTACCCCTCAAGAACAAATAGGATGGATGACAGGCAATCCACCTATCCCAGTGGGAGACATCTATAAAAGATGGATAATCCTGGGATTAAATAAAATAGTAAGAATGTATAGCCCTGTTAGCATTTTGGATATAAAACAAGGGCCAAAAGAACCCTTCAGGGATTATGTAGATAGATTTTTTAAAACACTCAGAGCTGAGCAAGCTACACAGGAGGTAAAAGGTTGGATGACAGAAACATTACTGGTCCAAAATGCAAATCCAGATTGTAAGTCCATTTTAAGAGCATTAGGACCAGGGGCTTCATTAGAAGAAATGATGACAGCATGTCAGGGAGTGGGAGGACCCAGCCATAAAGCAAGGGTTTTAGCTGAGGCAATGAGTCAAGCACAACAGACAAACATAATGATGCAGAGAGGCAATTTTAGGGGCCAGAAAAAGATTAAGTGTTTCAACTGTGGCAAAGAAGGACACCTAGCTAGAAATTGCAGGGCCCCTAGGAAAAAGGGCTGTTGGAAATGTGGGAAGGAGGGACACCAAATGAAAGACTGCTCTGAAAGACAAGCTAATTTTTTAGGGAGAATTTGGCCTTCCAGCAAGGGGAGGCCAGGAAATTTTCCTCAGAGCAGACCAGAGCCAACAGCCCCACCAGCAGAGCTCCTTGGGATGGGGGAAGAGATAGCCCCCCCTCCGAAGCAGGAGCAGAAAGACAGGGAACAGGGCCCACCTTTAGTTTCCCTCAAATCACTCTTTGGCAACGACCCCTTGTCACAATAAAAATAGGGGGACAGCTAAAAGAAGCTCTATTAGATACAGGAGCAGATGACACAGTTTTAGAAGACATAAATTTGCCAGGAAAATGGAAACCAAAAATGATAGGGGGAATTGGGGGTTTCATCAAAGTAAGACAGTATGATCAGATACTTATAGAAATTTGTGGAAAAAAGGCTATAGGTACAGTATTAGTAGGACCTACACCTGTCAACATAATTGGAAGGAATATGTTGACCCAGATTGGTTGTACTTTAAATTTCCCAATTAGTCCTATTGAGACTGTACCAGTAAAATTAAAGCCAGGAATGGATGGCCCAAAGGTTAAACAATGGCCATTGACAGAAGAAAAAATAAAAGCATTAACAGAAATTTGTACAGAAATGGAAAAGGAAGGAAAAATTTCAAAAATTGGGCCTGAAAATCCATACAATACTCCAATATTTGCTATAAAGAAAAAGGACAGCACTAAATGGAGAAAATTAGTAGATTTCAGAGAGCTCAATAAAAGAACACAAGACTTTTGGGAAGTTCAATTGGGGATACCGCACCCAGCGGGCCTAAAAAAGAAAAAATCAGTAACAGTACTAGATGTAGGGGACGCATATTTTTCAGTTCCTTTAGATGAAGACTTTAGAAAATATACTGCATTTACCATACCTAGTACAAACAATGAGACACCAGGAATCAGGTATCAGTACAATGTGCTTCCACAGGGATGGAAAGGATCACCGGCAATATTCCAGAGTAGCATGACAAAAATCTTAGAGCCCTTTAGATCAAGAAATCCAGACATAATTATCTATCAATACATGGATGACTTATATGTAGGATCTGATTTAGAAATAGGGCAGCATAGAGCAAAAATAGAAGAGTTAAGAGCTCATCTATTGAGCTGGGGATTTACTACACCAGACAAAAAGCATCAGAAAGAACCTCCATTCCTTTGGATGGGATATGAGCTCCATCCTGACAAGTGGACAGTCCAGCCTATAGTGCTGCCAGAGAAGGAAAGCTGGACTGTCAATGATATACAGAAATTAGTAGGGAAACTAAATTGGGCAAGTCAAATTTATGCAGGAATTAAAGTAAAGCAATTGTGTAAACTCCTCAGGGGAGCCAAAGCACTAACAGAGATAGTAACATTGACTGAGGAAGCAGAATTAGAATTGGCAGAGAACAGGGAGATTCTAAAAGAACCTGTGCATGGAGTATATTATGATCCATCAAAAGACTTAATAGCAGAAATACAGAAACAAGGGCAAGACCAATGGACATACCAAATTTATCAAGAGCCATTTAAAAATCTAAAAACAGGAAAATATGCAAGAAAAAGGTCTGCACACACTAATGATGTAAGACAATTAGCAGAAGTGGTGCAAAAGGTGGTCATGGAAAGCATAGTAATATGGGGAAAGACTCCTAAATTTAAACTACCCATACAAAAAGAGACATGGGAAACATGGTGGATGGACTATTGGCAGGCTACCTGGATTCCTGAATGGGAGTTTGTCAATACCCCTCCTCTAGTAAAACTATGGTACCAGTTAGAGAAGGACCCCATAGAAGGAGCAGAGACTTACTATGTAGATGGGGCAGCCAATAGGGAGACTAAGCTAGGAAAAGCAGGGTATGTCACTGACAGAGGAAGACAAAAGGTTATTTCCCTAGCTGAGACAACAAATCAAAAGACTGAACTACATGCAATCCATCTAGCCTTGCAGGATTCAGGATCAGAAGTGAACATAGTAACAGACTCACAGTATGCATTAGGAATCATTCAGGCACAACCAGACAGGAGTGAATCAGGGTTAGTCAATCAGATAATAGAGAAATTAATAGAAAAGGACAAAGTCTACCTGTCATGGGTACCAGCACACAAGGGAATTGGAGGAAATGAACAAGTAGATAAATTAGTCAGTTCCGGAATCAGGAAGGTGCTGTTTTTAGATGGGATAGATAAAGCTCAAGAAGAACATGAAAGATATCACAGTAATTGGAGAACAATGGCTAGTGATTTTAATCTGCCACCTGTAGTAGCAAAAGAAATAGTAGCCAGCTGTGATAAATGTCAGCTAAAAGGGGAAGCCATGCATGGACAAGTAGACTGCAGTCCAGGGATATGGCAATTAGATTGCACACATCTAGAAGGAAAAGTAATTCTAGTAGCAGTCCATGTAGCCAGTGGCTATATAGAAGCAGAAGTTATCCCAGCAGAAACAGGACAAGAGACAGCCTACTTTCTACTAAAATTAGCAGGCAGATGGCCAGTAAAAGTAGTACACACAGACAATGGTAGCAATTTCACCAGCGCTGCAGTTAAAGCAGCCTGTTGGTGGGCAAATATCCAACAGGAATTTGGGATCCCCTACAATCCCCAAAGTCAAGGGGTAGTAGAATCTATGAATAAGGAATTAAAGAAAATCATAGGACAGGTAAGAGAGCAAGCTGAACACCTTAAAACAGCAGTACAAATGGCAGTATTCATTCACAATTTTAAAAGAAAAGGGGGGATTGGGGGGTACAGTGCAGGGGAAAGAATAATAGACATAATAGCAACAGATATACAAACTAAAGAATTACAAAAACAAATTACAAAAATTCAAAATTTTCGGGTTTATTACAGGGACAGCAGAGATCCAATTTGGAAAGGACCAGCAAAACTACTTTGGAAAGGTGAAGGGGCAGTAGTAATACAGGACAATAGTGATATAAAGGTAGTACCAAGAAGAAAAGTAAAGATCATCAGGGATTATGGAAAACAGATGGCAGGTGATGATTGTGTGGCAGGTAGACAGGATGAGGATTAGAACATGGAACAGTTTAGTAAAACATCATATGTATGTCTCAAAGAAAACAAAGAATTGGTTTTATAGACATCACTATGAAAGCAGACATCCAAGAGTAAGCTCAGAAGTACACATCCCACTAGGGGATGCTAGACTAATAGTAAGAACATATTGGGGTCTGCATACAGGAGAAAAAGACTGGCACTTGGGGCATGGGGTCTCCATAGAATGGAGGCTAAAAAGATATAGCACACAAATAGATCCTGACCTGGCAGACCAACTAATTCATCTGCATTATTTTGACTGTTTTTCAGAATCTGCCATAAGGAGAGCCATATTAGGACAAGTAGTTAGCCCTAGTTGTGAATATCACACAGGACATAACCAGGTAGGATCCCTACAATATTTAGCACTGAAAGCATTAGTAACACCAACAAAGACAAGGCCACCTTTGCCTAGTGTTAGGAAATTAGCAGAGGATAGATGGAACAAGCCCCGGAAGACCAAGGACCACAGAGGGAGCCATACAATGAATGGATGTTAGAGCTGTTAGAAGATCTTAAGCATGAAGCCGTTAGACATTTTCCTAGACCATGGCTTCATGGATTAGGACAACATATCTATGAAACCTATGGGGATACTCAGGAAGGAGTTGAGGCTATAGTAAGAATTCTGCAACAACTACTGTTTGTTCATTTCAGAATCGGGTGCCAACATAGCAGAATAGGCATTATTCCAGGGAGAAGAGGCAGGAATGGATCCAGTAGATCCTAACCTAGAGCCCTGGAACCATCCGGGAAGTCAGCCTACAACTGCTTGTAACAAGTGTTACTGTAAAAAGTGTTGCTATCATTGTCCAAGTTGCTTTTTGAACAAAGGCTTAGGCATCTCCTATGGCAGGAAGAAGCGGAGACAGCGACGAGGAACTCCTCAAAGCAGTAAGGATCATCAAAATCCTATACAAAAGCAGTAAGTAATTAGCATATGTAATGCAGTCTTTGGAAATCTGTACAATAGTAGGATTCATAGTAGCGCTAATCCTAGCAATAGTTGTGTGGACTATAGTAGGAATAGAATATAAGAAAGTGCTAAGACAAAGAAAAATAGACAGGATAATTGAGAGAATAAGAGAAAGAGCAGAAGACAGTGGCAATGAGAGTGATGGGGATACAGAGGAATTATCAGCACTTGTTAGAATGGGGAACTATGATCTTGGGGATGATAATATTCTGTAGTGCTGTAGAAAACTTGTGGGTTACTGTCTACTATGGGGTACCGGTGTGGAAAGATGCAGAGACCACCCTATTTTGTGCCTCAGATGCTAAAGCATATGAGACAGAAGTGCATAATGTCTGGGCTACACATGCCTGTGTGCCCACAGACCCAAACCCACAAGAAATACCTTTGGAAAATGTGACAGAAAAGTTTAACATGTGGAAAAATTATATGGTAGAGCAGATGCATACAGATATAATCAGCCTATGGGATGAAAGCCTAAAGCCATGTGTAAAGTTAACCCCTCTCTGCGTTACTTTAAATTGTAGCGATGCCATTGGCAACTTTACAAATATCAAGGAAGAAATAACAAACTGCTCTTTCAATGTGACCACAGAACTAAGGGATAAGACAAAGAAAGTACATTCACTTTTTTATAGACTTGATATAGTACCACTTAATGAATATAGTAGTAGCAATAAAAGTAGTAACAATAATAATAGTAGCCAGGAATATGTATTAATAAATTGTAATACCTCAGCCATTACACAAGCCTGTCCAAAGGTAACCTTTGAGCCAATTCCCATACATTATTGTGCCCCAGCTGGTTTTGCGATCCTAAAGTGTAAGGACACAGATTACAATGGAACAGGGCCATGCAGGAATGTCAGCACAGTACAATGCACACATGGAATCAAGCCAGTAGTATCAACTCAACTGCTGTTAAATGGCAGCCTAGCAGAAAGAAATGTAACAATTAGATCTGAAAATATCACAAACAATGCCAAAACCATACTAGTACAACTTGTCAAGCCTGTGAGAATTAATTGTACCAGACCTTATAACAATACATTCAGAAGTATACATATAGGACCAGGAAGAGCATTCTATGCAACAGGTGACATAATAGGAGATATAAGGCAGGCGCATTGTAACATTAGCGGAGGACAGTGGAATAAAACTGTAAACCAAGTAAAGAAAGAATTAGGAAAACACTTTAACAAAACAATAATATTTCAACCATCCTCAGGAGGGGACCCACAAGTCACAAGGCACATTTTTAATTGTAGAGGAGAATTTTTCTATTGTAATACATCAAGCCTGTTTAATAGCACTTGGAATAACACTGCCAGCATGCAGAAGTCAAATAGCACGGGGTCAAATGACACTATAACTCTCCAATGCAGAATAAAGCAAATTATAAGAATGTGGCAAAGAACAGGACAGGCAATGTATGCCCCTCCCATCAAAGGAGATATAAGGTGTGAATCAAACATTACAGGACTAATATTAACAAGAGATGGTGGGAATGATAGCAGTCCAGATGAAATCTTCAGACCTGGAGGAGGAGATATGAGGGACAATTGGAGAAGTGAATTATATAAGTATAAAGTAGTACAAATTGAACCTCTAGGAGTAGCACCCACCAAGGCAAGAAGAAGAGTGGTGCAGAGAGAGAAAAGAGCAATTGGAATAGGAGCTGTCTTCCTTGGGTTCTTAGGAGCAGCAGGAAGCACTATGGGCGCGGCGTCAATAACGCTGACGGTACAGGCCAGACAATTATTGTCTGGCATAGTGCAACAGCAAAGCAATTTGCTGAGGGCTATAGAGGCTCAACAACATCTGTTGAAACTCACGGTCTGGGGCATTAAACAGCTCCAGGCAAGAGTCCTGGCTGTGGAAAGATACCTAAAGGATCAACAGCTCCTAGGAATTTGGGGTTGCTCTGGGAAACTCATCTGCACCACTAATGTGCCCTGGAATACTAGTTGGAGTAAAAATAAATCTCTGAGTGAAATATGGGATAACATGACCTGGCTGCAATGGGATAAAGAAATTAGCAATTACACAAACCTAATATATAACCTAATTGAAGAATCGCAGAACCAGCAGGAAAAGAATGAACAAGACTTATTAGCATTGGATAAGTGGGCAAATCTTTGGACTTGGTTTGACATATCAAATTGGCTGTGGTATATAAAAATATTCATAATGATAGTAGGAGGCTTAATAGGATTAAGAATAGTTTTTGCTGTGCTTACTGTAATAAATAGAGTTAGGCAGGGATACTCACCTTTGTCATTTCAGATCCATACCCCAAACCCAGGGGATCCCGACAGGCCCGGAAGAATCGAAGAAGAAGGTGGAGAGCAAGACAGAAACAGATCGATTCGATTAGTAAGCGGATTCTTAGCGCTTGCCTGGGACGATCTGCGGAGCCTGTGCCTTTTCTGCTACCACCGCTTGAGGGACTTCACCTTGATTGCAGCGAGGACTGTGGAACTTCTGGGACACAGCAGTCTCAAGGGGTTGAGACTGGGGTGGGAAGGCCTCAAGTATCTTGGGAATCTCCTGTTGTATTGGGGTCAGGAACTGAAAAATAGTGCTATTAATTTGTTTGATACCATAGCAATAGCAGTAGCTGGCTGGACAGATAGGGTTATAGAAGTAGGACAAAGAGTTGGTAGAGCTTTGCTCCACGTACCTAGAAGGATCAGACAGGGCTTTGAAAGGGCTTTGCTATAACATGGGTGGCAAGTGGTCAAAAAGTAAAATGGGCTGGCCTGAGATTAGGGAAAGAATGAGACGCGCTCCTGCTCCTTCAGCAGCAACAGGAGTAGGAGCAGTATCTCAAGATTTAGCTAGACATGGAGCAGTCACAAGCAGCAATACCAATCACCCTAGTTGCGTCTGGCTGGAAGCGCAAGAAGAAGA
>A2.CY.94.94CY017_41_AF286237_B.US.90.WEAU160_U21135
TTGAAAAGCGAAAGTAACAGGGACTCGAAAGCGAAAGTTCCAGAGGAGTTCTCTCGACGCAGGACTCGGCTTGCTGAGGTGCACACGGCAAGAGGCGAGGGGCGGCGACTGGTGAGTACGCCTAATATTTTTGACTAGCAGAGGCTAGAAGGAGAGAGATGGGTGCGAGAGCGTCAATATTAAGCGGGGGAAAATTAGATGCTTGGGAGAAAATTCGGTTAAGGCCAGGGGGAAAGAAAAAATATAGACTGAAACATTTGGTATGGGCAAGCAGGGAGCTGGAGAAATTCTCAATTAACCCTGGCCTTTTAGAAACACCAGAGGGATGTAGACAAATAATAAGGCAGTTACAACCAGCTCTCCAAACAGGAACAGAAGAACTTAAATCATTATATAATACAGTAGTAGTCCTCTACTGGGTACATCAAAGGGTAGATGTAAAAGACACCAAGGAAGCTCTAGATAAAATAGAGGAAGAACAAAACAAGCAGAAAACACAGCATGCAGCAGCTGACACAGGGAACAGCAGCAGTCAAAATTATCCCATAGTGCAAAATGCACAAGGGCAAATGGTACACCAGGCTATATCACCTAGGACGTTGAATGCCTGGGTCAAAGTAGTAGAAGAAAAGGCTTTCAGCCCAGAAGTAATACCTATGTTTACAGCATTATCAGAAGGAGCCACCCCACAAGACTTAAATACTATGCTAAACACAGTGGGGGGACATCAAGCAGCTATGCAAATGTTAAAAGATACCATCAATGAGGAAGCTGCAGAATGGGACAGGGTACATCCAGTACATGCAGGGCCTATTCCACCAGGCCAGATGAGAGAACCAAGGGGAAGTGACATAGCAGGAACTACTAGTACCCTTCAGGAACAAATAGGTTGGATGACCAGCGATCCACCCATCCCAGTGGGAGAAATTTATAAAAGATGGATAATCCTGGGATTAAATAAAATAGTAAGAATGTATAGCCCTGTCAGCATTTTGGACATAAGACAAGGGCCAAAAGAACCCTTTAGAGATTATGTGGATAGGTTCTTTAAAACTCTAAGAGCTGAGCAAGCCACACAGGAGGTAAAAAACTGGATGACGGACACCTTGCTGGTCCAAAATGCGAACCCAGATTGTAGATCCATCTTGAGAGCATTAGGACCAGGGGCCTCATTAGAAGAAATGATGACAGCATGTCAGGGAGTGGGAGGACCCAGCCATAAAGCAAGGGTTTTGGCTGAAGCAATGAGCCATGTACAAAGTACAAATACAAACATAATGATGCAGAGAGGCAATTTTAGGGGTCAAAAAAGAATTAAGTGTTTCAACTGTGGCAAGGAAGGACACCTAGCCAGAAATTGCAGGGCCCCTAGGAAAAAGGGCTGCTGGAAATGTGGAAAGGAAGGACATCAAATGAAAGATTGCACTGAGAGACAGGCTAATTTTTTAGGGAAAATTTGGCCTTCCAACAAAGGGAGGCCAGGAAATTTTCCTCAGAGCAGAACAGAGCCAACAGCCCCACCAGCAGAGAACTTGAGAATGGGGGAAGAGATAACCTCCTCCCTGAAGCAGGAACTGGAGACCAGGGAACCATACAATCCTGCAATTTCCCTCAAATCACTCTTTGGCAACGACCCCTTGTTACAGTAAAGATAGAGGGACAGCTAAAAGAAGCTCTATTAGATACAGGAGCAGATGATACAGTGTTAGAAGAAATAAATTTGCCAGGAAAATGGAAACCAAAAATGATAGGGGGAATTGGAGGTTTTATCAAAGTAAGACAATATGATCAGATAGCTATAGAAATTTGTGGAAAAAGGGCCATAGGTACAGTATTAGTAGGACCTACCCCTGTCAACATAATCGGAAGAAATATGTTGGTTCAGCTTGGTTGTACTTTAAATTTTCCAATTAGTCCTATTGAAACTGTACCAGTAAAATTAAAGCCAGGAATGGATGGTCCAAAGGTTAAACAATGGCCATTGACAGAAGAAAAAATAAAAGCATTAACAGAAATCTGTAAAGAAATGGAAAAGGAAGGAAAAATTTCAAAAATTGGGCCTGAAAATCCATACAACACTCCAGTGTTTGCTATAAAGAAAAAAGACAGCACTAAATGGAGAAAATTAGTAGATTTTAGAGAACTCAATAAGAGAACTCAAGACTTCTGGGAAGTTCAGTTAGGAATACCACATCCAGCAGGATTAAAAAAGAAAAAAGCAGTAACAGTACTTGATGTGGGGGACGCATATTTTTCCGTTCCCTTACATGAAGACTTCAGAAAATATACTGCATTCACCATACCTAGTACCAACAATGAGACACCAGGAGTTAGGTATCAGTACAATGTACTTCCACAGGGATGGAAAGGATCACCAGCAATATTCCAGAGTAGCATGACAAAGATCTTAGAGCCCTTTAGATCAAAGAATACAGAATTAATCATCTACCAATACATGGATGACTTGTATGTAGGATCTGATTTAGAAATAAGCCAGCATAGAGTAAAAATAGAGGAATTAAGGGCTCACTTATTGAAATGGGGATTTTATACACCAGACAAAAAACATCAGAAAGAACCTCCATTTCTTTGGATGGGATATGAGCTTCATCCTGACAAATGGACAGTCCAGCCTATAAAGCTGCCAGAAAAAGACAGCTGGACTGTCAATGATATACAGAAATTAGTAGGGAAATTAAATTGGGCAAGTCAGATTTATGCAGGGATTAAAGTAAAGCAACTGTGTAAACTCCTTAGAGGAGCCAAAGCACTAACAGACATAGTAACACTGACTAAAGAAGCAGAGTTAGAATTAGAAGAGAACAGGGAAATTTTAAAAACCCCTGTACATGGGGTATACTATGACCCATCAAAAGACTTAATAGCAGAAATACAGAAACAAGGGCAAGACCAATGGACATATCAAATTTATCAGGAACCCTTTAAGAATCTGAAAACAGGGAAATATGCAAAAAGGAGGTCCACCCACACTAATGATATAAAACAGTTAACAGAAGCAGTACAAAAAATAACCATGGAAAGCATAGTGATATGGGGAAAGACTCCTAAATTTAAATTACCCATACAAAAGGAAACATGGGAGACATGGTGGGCGGAGTATTGGCAGGCTACCTGGATTCCTGAGTGGGAGTTTGTCAATACCCCTCCTCTAGTAAAACTGTGGTACCAGTTAGAAAAAGAACCCATAGCAGGAGCAGAAACTTTCTATGTAGATGGGGCAGCTAATAGAGAGACTAAACTAGGAAAGGCAGGGTATGTCACTGACAGAGGAAGACAAAAAATTGTCTCCCTGACGGAGACAACAAATCAAAAGACTGAATTACATGCAATCTATTTGGCTTTACAGGATTCAGGATTAGAAGTGAACATAGTGACAGATTCACAGTATGCATTAGGAATCATTCAAGCACAACCAGAAAGGAGTGAATCAGAGATAGTCAATCAAATAATAGAAAAATTAATAGAAAAGGAAAGGGTCTACCTATCATGGGTACCAGCACACAAAGGGATTGGAGGAAATGAACAAGTAGACAAATTAGTCAGTTCTGGAATCAGGAAAGTGCTATTTTTAGATGGGATAGATAAGGCTCAAGAGGAACATGAAAGATATCACAGCAATTGGAGAGCAATGGCTCATGACTTTAATCTACCACCTGTAGTAGCAAAAGAAATAGTAGCTAGCTGTGATAAATGTCAGCTAAAAGGGGAAGCCATGCATGGACAAGTAGACTGTAGTCCAGGAATATGGCAACTAGATTGCACACATCTTGAAGGAAAAGTTATCCTGGTGGCAGTCCATGTGGCCAGTGGCTATATAGAAGCAGAAGTCATCCCAACAGAAACAGGACAGGATACAGCATACTTTATATTAAAACTAGCAGGAAGATGGCCAGTAAAAGTAATACATACAGACAATGGGCCCAATTTCATCAGTGCAACAGTTAAGGCAGCCTGTTGGTGGGCAGGTATCCAACAAGAATTTGGGATTCCCTACAATCCCCAAAGTCAAGGAGTAGTGGAATCTATGAATAAAGAATTAAAGAAAATCATAGGGCAGGTAAGAGATCAAGCTGAACACCTTAAGACAGCAGTACAAATGGCAGTATTCATTCACAATTTTAAAAGAAAAGGGGGGATTGGGGGATACAGTGCAGGGGAAAGAATAATAGACATAATAGCAACAGATATACAAACTAAAGAACTACAAAGACAAATTACAAAAATTCAAAATTTTCGGGTTTATTACAGGGACAGCAGAGATCCAATTTGGAAAGGACCAGCAAAACTCCTTTGGAAAGGTGAAGGGGCAGTAGTAATACAAGACAATAGTGACATAAAGGTAGTACCAAGAAGAAAAGCAAAGATCATTAGGGATTATGGAAAACAGATGGCAGGTGATGATTGTGTGGCAGGTAGACAGGATGAGGATTAGAACATGGAACAGTTTAGTTAAACATCATATGTATATTTCAAGGAAAGCTAAAGGTTGGGTCTATAAACATCACTATGAAAGCAGAAATCCAAGAATAAGTTCAGAAGTACACATCCCGCTAGGGGAGGCTAGAATAATAGTAAGAACATATTGGGGTCTGCACATAGGAGAAAAAGACTGGCACTTGGGTCATGGAGTCTCCATAGAATGGAGGCAAAACAGGTATCATACACAAATAGACCCTGATCTGGCAGACCATCTAATCCATCTGTATTATTTTGACTGTTTTTCAGAATCTGCCATAAGGAAAGCCATAATAGGAGAAATAGTTAGTCCTAGGTGTGAATATCAAGCAGGACATAACAAGGTAGGGTCTCTGCAATATTTGGCATTGAAAGCAGTAGTAGCTTCAACAAGGACAAAGCCACCTTTGCCTAGTGTTAGGAAATTAGTAGAGGATAGATGGAACAAGCCCCAGAAGACCAAGGGCCACAGAGGGAGCCATACAATGAATGGATGTTAGAACTGTTAGAGGAGCTCAAGCAGGAAGCTGTTAGACATTTCCCTAGGCACTGGCTACATGGCCTAGGACAATACATCTATAATACCTATGGGGATACCTGGGAAGGAGTTGAAGTTATCATAAGATATCTGCAACAACTACTGTTTGTCCATTTCAGAATTGGGTGCCAACATAGCAGGATAGGCATTATTCGAAGAAGAAGAGTAAGGGATGGAGCCAGTAGACCCTAAACTAGAGCCCTGGAACCATCCGGGAAGTCAGCCTAAAACTGCTTGTACCAAATGTTATTGTAAACGCTGTTGCTATCATTGCCAGTTGTGCTTTATAAACAAAGGCTTAGGCATCTCCTACGGCAGGAAGAAGCGACGACCCCGACGAAAGCCTTCTCCAAGCAATAAGGACCATCAAAATCCTATACCAAAGCAGTAAGTAGTAGTAATTAATATATGTAATGTTACCTTTAGTAATATTGGCAATAGTAGGACTGATAGTAGCTTTAATCTTAGCAATAGTTGTATGGACTATAGTATTCATAGAATATAAGAAAATTAAGAAGCAAAGGAAAATAGACTGGTTAATCAAAAGAATAAGTGAGAGAGCAGAAGACAGTGGCAATGAGAGTGATGGGGACACAGAGGAACTATCAGCACTTGTGGAGAGGGGGCATCTTGATTTTGGGGATGTTAATAATGTGTAAAGCTACAGATTTGTGGGTCACAGTATACTATGGAGTACCTGTGTGGAAAGATGCAGATACCATCCTATTTTGTGCATCAGATGCTAAAGCATATGATACAGAAGTGCATAATGTATGGGCCACACATGCCTGTGTACCCACAGACCCCAACCCACAAGAAATAAACCTGGAAAATGTAACAGAAAATTTTAATATGTGGAAAAATAACATGGTAGAGCAGATGCAAGAAGATATAATCAGCTTATGGGATCAAAGCCTAAAGCCATGTGTAAAATTAACCCCGCTCTGCGTCATTTTAAATTGTAGCAATGCCAATACCAGCACCCATAGCAATAGCAGTAGCACCCAGAGCCCCATTAATGAAGAAATAAAAAACTGCTCTTACAATACTACCACAATACTAAGAGATAAGACACAAAAAGTTTATTCACTGTTTTATAGACTTGATGTAGTACAACTTGATGAAAGTGAAAATAAGAATACATCAGGTAGTAATACTCTGTATAGACTAATAAATTGTAATACCTCAACCATCACACAAGCGTGTCCAAAGGTAACCTTTGAGCCAATTCCTATACATTATTGTGCCCCAGCTGGTTTTGCGATTCTAAAGTGTAAGGATCCGAGATTCAATGGAACAGGGTCATGCAAGAATGTTAGCTCAGTACAATGTACACATGGAATTAAACCAGTAGCATCAACTCAACTGCTGTTGAATGGCAGTCTAGCAGAAGGAGGGAAAATAATGATTAGATCTGAAAATATTACAAACAATGCCAAAAACATAATAGTTCAGTTTACTAAGCCTGTACTAATTACTTGTATCAGACCCAACAACAATACAAGAAAAAGTATACGCTTTGGACCAGGACAAGCCTTCTATACAAATGAAATAATAGGGGACATAAGACAAGCACATTGTAATATCAACAAAACATTATGGAATGACACTTTACAAAAGGTAGCTGAACAATTAAGAGAGAAATTCCCTAAGAAAACCATAATCTTTACTAACTCCTCAGGAGGGGACCCAGAAATTACAACACTTAGTTTTAATTGTGCAGGAGAATTTTTCTATTGCAATACAACAGGCCTGTTTAATGGTACGTGGTGGAACAATGGTACGTGGAACGGGCCCTACACACCTAATAACACCAATGGAAGTATAATCCTCCCATGCAGAATAAAACAAATTATAAACATGTGGCAGAGAGTAGGAAGAGCAATGTATGCCCCTCCCATTGCAGGAATAATAAAGTGTACATCAAACATTACAGGAATAATATTGACAAGAGATGGTGGTAACAATGGGACTAATGAGACCTTCAGACCTGGAGGAGGAGATATGAGGGACAATTGGAGAAGTGAATTATATAAATATAAAGTAGTAAAACTTGAACCACTAGGAGTAGCACCTACCAGGGCAAAAAGAAGAGTGGTGGAGAGAGAAAAAAGAGCAGTTGGACTGGGAGCTGTCTTCCTTGGGTTCTTGGGAGCAGCAGGAAGCACTATGGGCGCGGCGTCACTAACGCTGACGGTACAGGCCAGACAATTATTGTCTGGTATAGTGCAACAGCAAAGCAATTTGCTGCAGGCTATAGAAGCTCAACAGCATCTGTTGAAACTCACAGTCTGGGGCATTAAACAGCTCCAGGCGAGGGTCCTGGCTGTGGAAAGATACCTAAAGGATCAACAGCTCCTGGGAATTTGGGGCTGCTCTGGAAAACTCATCTGCGCCACTACTGTGCCCTGGAACACTAGTTGGAGTAATAAGTCTCAGGATGAGATTTGGGACAACATGACCTGGTTGCAATGGGATAAAGAAATTAGCAATTACACAAACATAATATATAGGTTACTTGAAGAATCGCAAAACCAGCAGGAAAAGAATGAGCAAGACTTATTGGCATTAGACAAATGGGCAGATTTGTGGAGTTGGTTCAACATTTCACACTGGCTGTGGTATATAAGAATATTTATAATGATAGTAGGAGGCTTGATAGGATTAAGAATAGTTTTTGCTATAATTACTGTAGTAAATAGAGTTAGGCAGGGATACTCACCTGTGTCATTTCAGATCCCTACCCCAAGCCCAGAGGGTCCCGACAGGCCCAGAGGAACCGAAGAAGGAGGTGGAGAGCAAGGCAGAGACAGATCGATTCGATTAGTGAACGGGTTCTTCGCACTTGCCTGGGACGACCTACGGAGCCTGTGCCTCTTCAGTTACCACCGCTTGAGAGATTGCATATTGATTGCAGCGAGGACTGTGGAACTTCTGGGACACTGCAGTCTCAAGGGACTGAGACTGGGGTGGGAAGGTCTCAAGAATCTGTGGAATCTTCTGTTATACTGGGGTCGGGAACTGAAGAATAGTGCTATTAGCTTATTTGATACTATAGCAGTAGCAGTAGCTGAGTGGACAGATAGGGTTATAGAAATAGGGCAAAGAGCTTTCAGAGCTATTCTCAACATACCTAGAAGAATCAGACAGGGCTTAGAAAGGGCTTTACTATAAAATGGGGGGCAAGTGGTCAAAAAGGAGCATACCAGGATGGCCTGCTATTAGGGAGAGAATGAGAAGAACTCCTCCAACAGCACAAAGAACAGAAGCAGTGTCTCCAGCAGCAGAAGGGGTGGGAGCAGTATCTCGAGACTTGGCAAAACATGGAGCAATCACAAGTAGCAATGAGAATAATGCTGATTGCGTCTGGTTAAAAGCACAAGAGGATGAGGAGGTGGGTTTTCCAGTTAGACCTCAGGTACCTTTAAGACCAATGACTTACAAGGCAGCGCATGATCTTAGCCACTTTTAAAAGAAAAGGGGGGACTGGATGGGTTAATTTACTCCCAGAAAAGACAAGACATCCTTGATATGTGGGTCTACCACACACAAGGCTACTTCCCTGATTGGCAGAATTACACACCAGGGCCAGGGATCAGATACCCATTAACATTTGGATGGTGCTTCAAGCTAGTACCAGTAGAGCCATCTGAGGTAGAAGAAGCTACTCAGGGAGAGAACAACAGCTTATTACACCCTATATGCCAACATGGAGTAGATGACCCTGAAAGAGAAGTGTTAAGATGGGAGTTTGATAGAAGCCTGGCACGGAGACACAGAGCCCGAGAGCTGCATCCGGAGTACTACAAAGACTGCTGACACAGAAGTTGCTGACGGGGACTTTCCGCTGGGGACTTTCCAGGGAGGTGTGGTGTGGGCGGAGTTGGGGAGTGGCTAACCCTCAGATGCTGCATATAAGCAGCTGCTTCTCGCATGTACTGGGTCTCTCTTGTTGGACCAGATAGAGCCCGGGAGCTCTCTGGCTAGCAGGGGAACCCACTGCTTAAGCCTCAATAAAGCTTGCCTTGAGAGCTTC
>A2.CD.97.97CDKS10_AF286241_C.ZA.03.SK029B2_AY772691
AGCTATAAGAGAGACTTAATTAGGAAAAGCAGGATTTGTCACTGACAGAGGAAGACAAAAAATTGTCTCCCTGACGGAGACAACAAATCAAAAGACTGAATTACATGCAATCTATTTAGCTTTACAGGATTCAGAATTAGAAGTAAACATAGTAACAGATTCACAGTATGCATTAGGAATCATTCAGGCACAACCAGATAGGAGTGAATCAGAGTTAGTCAATCAAATAATAGAAAAGTTAATAGAAAAAGAGAGGGTCTACCTGTCATGGGTACCAGCACACAAGGGGATTGGAGGAAATGAACAGGTAGACAAATTAGTCAGTTCTGGAATCAGGAAAGTGTTATTTTTAGATGGAATAGATAAAGCTCAAGAAGAACATGAAAGATATCACAGCAATTGGAGAGCCATGGCTCATGACTTTAATCTGCCACCTATAGTAGCAAAAGAAATAGTAGCTAGTTGTGACAAATGTCAGCTAAAAGGGGAAGCCATGCATGGACAAGTAGACTGTAGCCCAGGAATATGGCAACTAGATTGCACACATCTAGAAGGAAAAGTTATCCTGGTAGCAGTCCATGTAGCCAGTGGCTATATAGAAGCAGAAGTCATTCCAGCAGAAACAGGACAGGAAACAGCATACTTTATATTAAAACTAGCAGGAAGATGGCCAGTAAAAGTAATACATACTGACAATGGGTCCAATTTCACCAGTGCAACAGTTAAGGCAGCCTGTTGGTGGGCAGGAGTCCAACAGGAATTTGGAATTCCCTACAATCCCCAAAGTCAAGGAGTAGTGGAATCTATGAACAAAGAATTAAAGAAAATCATAGGGCAAGTAAGAGACCAAGCTGAACACCTTAAGACAGCAGTACAAATGGCAGTATTCATCCACAATTTTAAAAGAAAAGGGGGGATTGGGGGATACAGTGCAGGGGAAAGAATAATAGACATAATAGCAACAGATATACATACTAAAGAATTACATTTACAAATTATGAAAATTTAAAATTTTCGGGTTTATTACAGAGACAGCATAGATCCCATTTGGAAAGGACCAGCAAAACTCCTCTGGAAAGGTGAAGGGGCAGTAGTAATACAAGACAATAGTGAGATAAAGGTAGTACCAAGAAGAAAAGCAAAGATCATTAGGGATTATGGAAAACAGATGGCAGGTGATGATTGTGTGGCAGGTAGACAGGATGAGGATTAGAACATGGAACAGTTTAGTAAAACATCATATGTATATTTCAAAGAAAGCTAAAAAGTGGTTCTATAGACATCACTATGAAAGTAGACATCCGAGAGTAAGTTCAGAAGTACACATCCCGTTAGGGGAGGCTACATTAATAGTAAGAACATATTGGGGTCTGCACCCAGGAGAGAAAGAATGGCAATTGGGTCATGGGGTCTCCATAGAATGGAGGCAGAAGAGGTATAGTACACAAATAGACCCTGATCTGGCAGACCATCTAATCCATCTGTATTATTTTGACTGTTTTTCAGAATCTGCCATAAGGAAAGCCATATTAGGAGAAATAGTTAGTCCTAGGTGCGAATATCAAGCAGGACATAACAAGGTAGGATCTCTGCAATATTTGGCATTGAAAGCATTAGTAGTCCCAAACAAGGCAAGGCCACCCTTGCCTAGTGTTAGGAAATTAGTAGAGGATAGATGGAACAAGCCCCGGAAGACCAGGGGCCACCGAGGGAGCCACACAATGAATGGGTGCTAGAACTATTAGAGGAGCTCAAGCAGGAAGCTGTTAGGCATTTCCCTCGGCAGTGGCTACATGGCCTAGGACAACTTATATATAGTACCTATGGGGATACTTGGGAAGGAGTTGAAGCTATAATAAGAACTTTGCAACAACTGCTGTTTGTCCATTTCAGAATTGGGTGCCGACATAGCAGAATAGGCATTTCGAAGAAGAAGAGTAAGGATGGAGCCAGTAGATCCTAAACTAGAGCCCTGGAACCATCCGGGAAGCCAGCCTAAAACTGCTTGTAACAAGTGCTATTGTAAAAAGTGTTGCTATCATTGCCAGCTGTGCTTTTTAAACAAAGGCTTAGGCATCTCCTATGGCAGGAAGAAGCGGAGACCCCGACGAGGACCTTCTCAGAGCAGTAAAGATCATCAAAATCCTATACCAAAGCAGTAAGTAGTGGTAATTAATAATGTAATGTTGTCCTTAGAAATAGCTGCAATAGTAGGACTGGTAGTAGCATTAATCGCAGCAATAGTTGTATGGACTATAGTATTTATAGAATATAGGAAGATTAGGGAGCAAAGGAAAATAGACTGGTTAATCCAAAGAATAAGTGAAAGAGCAGAAGACAGTGGCAATGAGAGTGATGGGGACACAGACGAGTTATCAGCACTTGTGGAGATGGGGAATCTTAATTTTGGGGATGCTAATAATTTGTAAAGCTACAGATTGGTGGGTCACAGTATACTATGGAGTACCTGTGTGGAAAGATGCAGAAACCACCTTATTTTGCGCATCAGATGATAAAGCATATGAGACAGAAGCGCATAATGTCTGGGCCACACATGCCTGTGTACCCACAGACCCCAACCCACAAGAAGTAAACCTAAAAAATGTGACAGAAGATTTTAACATGTGGAAAAATAATATGGTAGAGCAGATGCATGAAGATATAATCAGTCTATGGGATCAAAGCCTAAAGCCATGTGTAAAATTAACCCCTCTCTGTGTCACGTTAAACTGTAGCAATGCCAACACCAATAGCACCAATAGCACTAGCGCCCCTAGCATGGGCCCTGGAGAAATAAAAAACTGTTCTTTTAATGTTACCACAGAAGTAAGAGATAAAGAAAAGAAAGTCTATGCACTGTTTTATAAACTTGATGTAGTACAAATTAATGAAAGTGACAGTAATAGTACAAAGGATAGTACTCAGTATAGACTAATAAATTGTAATACCTCAGCCATCACACAGGCTTGTCCAAAGGTATCCTTTGAGCCAATTCCTATACATTATTGTGCCCCAGCTGGTTTTGCGATTCTAAAGTGTGAGGATCCGAGATTCAATGGAACAGGACCATGCAATAATGTTAGCTCAGTACAATGTACACATGGAATTATGCCAGTAGCATCAACTCAACTGCTGTTGAATGGCAGTCTAGCAGAAAAAGAGGTGATGATTAGATCTGAAAATATTACAAACAATGCCAAAAACATAATAGTACAGTTTAATGAATCGGTACCAATTACTTGTATCAGACCCAACAACAATACGAGAAAAGGTATACCTATTGGACCAGGACAAGTCTTCTATACAAGTGACATAATAGGGGATATAAGACAAGCATATTGTAGTATCAACAAAACAAAATGGGATGCCTCTTTACAAAAGGTAGCTGAACAATTAAGAAAACACTTCCCTAATAAAACAATAAATTTTACCAAACCCTCAGGAGGGGATCTAGAAATTACAACACATAGTTTTAATTGTGGAGGAGAATTTTTCTATTGTAATACAACAAGCCTGTTTAATAGCACATGGAAGAATGGCGCCACCATACAGGAGAATAGCACGGAGACAAATGGAATTATGACTCTCCCATGCAGAATAAAACAAATTGTAGACATGTGGCAGGAAGTAGGACAAGCAATGTATGCCCCTCCCATTGCAGGAGTAATATATTGTACATCAAACATTACAGGAATAATATTGACAAGAGATGGTGGGAGCAGTAACACCAATAGTGAGATCTTTAGGCCTGGAGGAGGAGATATGAGGGACAATTGGAGAAGTGAATTATATAAGTATAAAGTAGTAAAAATTGAACCACTAGGAGTAGCACCCTCCAGGGCAAAGAGAAGAGTGGTGGAGAGAGAAAAAAGAGCAGTGGGAATAGGAGCTGTTTTCCTTGGGTTCTTGGGAGCTGCAGGAAGCACTATGGGCGCGGCGTCAATAACGCTGACGGTACAGGCCAGACAGTTATTATCTGGCATAGTGCAACAGCAAAGCAATTTGCTGAAGGCTATAGAGGCTCAACAGCATCTGTTGAAACTCACAGTCTGGGGCATTAAACAGCTCCAGGCAAGAGTCCTGGCTCTGGAGAGATACCTACAAGATCAACAGCTCCTGGGAATTTGGGGTTGCTCTGGAAAACTCATCTGCACCACTACTGTGCCCTGGAACTCTAGTTGGAGTAATAAGACTTACGAGGAGATTTGGAACAACATGACCTGGTTGCAATGGGATAGAGAAATTGACAATTACACAAATATAATATACAATCTACTTGAAGAATCGCAGAACCAGCAGGAAAAGAATGAACAAGACTTACTGGCATTAGATAAATGGGCAAGTTTGTGGAATTGGTTTAGCATAACAAACTGGCTGTGGTATATAAGAATATTCATAATGATAGTAGGAGGCTTGATAGGATTAAGAATAGTTATGGCTATAATTTCTGTAGTGAATAGAGTTAGGCAGGGATACTCACCTTTGTCATTTCAGATCCCTACCCCAAACCCAGAGGGTCTCGACAGGCACGGAAGAATCGAAGAAGGAGGTGGAGAGCAAGACAGAACCAGATCGATTCGATTAGTGAGCGGATTCTTGGGACTTGCCTGGGACGACCTACGGAGCCTGTGCCTCTTCAGCTACCACCGATTGAGAGATTGCATCTTGATTGTAGCGAGGACTGTGGAACTTCTGGGACACAGCAGTCTCAAGGGACTGAGACTGGGGTGGGAGGGCCTCAAATATTTGGGGGGTCTTGTGCAGTATTGGGGTCTAGAACTAAAAAAGAGTGCTATTAGTCTGCTTGATACCATAGCAATAAGAGTAGCTGAAGGAACAGATAGAATTATAGAAATAGTACAAAGATTTTGCAGAGCTATCCGCAACATACCTAGAAGAATAAGACAGGGCTTTGAAGCAGCTTTGCTATAAAATGGGGGGCAAGTGGTCAAAAAGTACCATAGTGGGATGGCCTGCTATTAGGGAGAGAATAAGAAGAACTCCTCCAGCAGCAGAAAGAGTAGGGGCAACAAGACAAACTCCCCCAGCAGCAGAAGGAGTAGGAGCAGTGTCTCGAGATTTAACTACACATGGAGCAGTCACAATTGGTAATACAGCAGCCTATAATCCTGATAGCGCCTGGGTAGAAGCGCAAGAAGAGGAGGAGGAAGTAGGCTTCCCAGTCAAGCCACAGGTACCTGTAAGACCAATGACCTTCAAGGGAGCTTTTGATCTCAGCCACTTTTTAAAAGAAAAGGGGGGACTGGATGGGTTAATTTACTCCCAGAAAAGACAAGACATCCTTGATCTGTGGGTCTACAAC
>A2.CY.94.94CY017_41_AF286237_D.UG.99.99UGA03349_AF484518
TTGAAAAGCGAAAGTAACAGGGACTCGAAAGCGAAAGTTCCAGAGGAGTTCTCTCGACGCAGGACTCGGCTTGCTGAGGTGCACACGGCAAGAGGCGAGGGGCGGCGACTGGTGAGTACGCCTAATATTTTTGACTAGCAGAGGCTAGAAGGAGAGAGATGGGTGCGAGAGCGTCAATATTAAGCGGGGGAAAATTAGATGCTTGGGAGAAAATTCGGTTAAGGCCAGGGGGAAAGAAAAAATATAGACTGAAACATTTGGTATGGGCAAGCAGGGAGCTGGAGAAATTCTCAATTAACCCTGGCCTTTTAGAAACACCAGAGGGATGTAGACAAATAATAAGGCAGTTACAACCAGCTCTCCAAACAGGAACAGAAGAACTTAAATCATTATATAATACAGTAGTAGTCCTCTACTGGGTACATCAAAGGGTAGATGTAAAAGACACCAAGGAAGCTCTAGATAAAATAGAGGAAGAACAAAACAAGCAGAAAACACAGCATGCAGCAGCTGACACAGGGAACAGCAGCAGTCAAAATTATCCCATAGTGCAAAATGCACAAGGGCAAATGGTACACCAGGCTATATCACCTAGGACGTTGAATGCCTGGGTCAAAGTAGTAGAAGAAAAGGCTTTCAGCCCAGAAGTAATACCTATGTTTACAGCATTATCAGAAGGAGCCACCCCACAAGACTTAAATACTATGCTAAACACAGTGGGGGGACATCAAGCAGCTATGCAAATGTTAAAAGATACCATCAATGAGGAAGCTGCAGAATGGGACAGGGTACATCCAGTACATGCAGGGCCTATTCCACCAGGCCAGATGAGAGAACCAAGGGGAAGTGACATAGCAGGAACTACTAGTACCCTTCAGGAACAAATAGGTTGGATGACCAGCGATCCACCCATCCCAGTGGGAGAAATTTATAAAAGATGGATAATCCTGGGATTAAATAAAATAGTAAGAATGTATAGCCCTGTCAGCATTTTGGACATAAGACAAGGGCCAAAAGAACCCTTTAGAGATTATGTGGATAGGTTCTTTAAAACTCTAAGAGCTGAGCAAGCCACACAGGAGGTAAAAAACTGGATGACGGACACCTTGCTGGTCCAAAATGCGAACCCAGATTGTAGATCCATCTTGAGAGCATTAGGACCAGGGGCCTCATTAGAAGAAATGATGACAGCATGTCAGGGAGTGGGAGGACCCAGCCATAAAGCAAGGGTTTTGGCTGAAGCAATGAGCCATGTACAAAGTACAAATACAAACATAATGATGCAGAGAGGCAATTTTAGGGGTCAAAAAAGAATTAAGTGTTTCAACTGTGGCAAGGAAGGACACCTAGCCAGAAATTGCAGGGCCCCTAGGAAAAAGGGCTGCTGGAAATGTGGAAAGGAAGGACATCAAATGAAAGATTGCACTGAGAGACAGGCTAATTTTTTAGGGAAAATTTGGCCTTCCAACAAAGGGAGGCCAGGAAATTTTCCTCAGAGCAGAACAGAGCCAACAGCCCCACCAGCAGAGAACTTGAGAATGGGGGAAGAGATAACCTCCTCCCTGAAGCAGGAACTGGAGACCAGGGAACCATACAATCCTGCAATTTCCCTCAAATCACTCTTTGGCAACGACCCCTTGTTACAGTAAAGATAGAGGGACAGCTAAAAGAAGCTCTATTAGATACAGGAGCAGATGATACAGTGTTAGAAGAAATAAATTTGCCAGGAAAATGGAAACCAAAAATGATAGGGGGAATTGGAGGTTTTATCAAAGTAAGACAATATGATCAGATAGCTATAGAAATTTGTGGAAAAAGGGCCATAGGTACAGTATTAGTAGGACCTACCCCTGTCAACATAATCGGAAGAAATATGTTGGTTCAGCTTGGTTGTACTTTAAATTTTCCAATTAGTCCTATTGAAACTGTACCAGTAAAATTAAAGCCAGGAATGGATGGTCCAAAGGTTAAACAATGGCCATTGACAGAAGAAAAAATAAAAGCATTAACAGAAATCTGTAAAGAAATGGAAAAGGAAGGAAAAATTTCAAAAATTGGGCCTGAAAATCCATACAACACTCCAGTGTTTGCTATAAAGAAAAAAGACAGCACTAAATGGAGAAAATTAGTAGATTTTAGAGAACTCAATAAGAGAACTCAAGACTTCTGGGAAGTTCAGTTAGGAATACCACATCCAGCAGGATTAAAAAAGAAAAAAGCAGTAACAGTACTTGATGTGGGGGACGCATATTTTTCCGTTCCCTTACATGAAGACTTCAGAAAATATACTGCATTCACCATACCTAGTACCAACAATGAGACACCAGGAGTTAGGTATCAGTACAATGTACTTCCACAGGGATGGAAAGGATCACCAGCAATATTCCAGAGTAGCATGACAAAGATCTTAGAGCCCTTTAGATCAAAGAATACAGAATTAATCATCTACCAATACATGGATGACTTGTATGTAGGATCTGATTTAGAAATAAGCCAGCATAGAGTAAAAATAGAGGAATTAAGGGCTCACTTATTGAAATGGGGATTTTATACACCAGACAAAAAACATCAGAAAGAACCTCCATTTCTTTGGATGGGATATGAGCTTCATCCTGACAAATGGACAGTCCAGCCTATAAAGCTGCCAGAAAAAGACAGCTGGACTGTCAATGATATACAGAAATTAGTAGGGAAATTAAATTGGGCAAGTCAGATTTATGCAGGGATTAAAGTAAAGCAACTGTGTAAACTCCTTAGAGGAGCCAAAGCACTAACAGACATAGTAACACTGACTAAAGAAGCAGAGTTAGAATTAGAAGAGAACAGGGAAATTTTAAAAACCCCTGTACATGGGGTATACTATGACCCATCAAAAGACTTAATAGCAGAAATACAGAAACAAGGGCAAGACCAATGGACATATCAAATTTATCAGGAACCCTTTAAGAATCTGAAAACAGGGAAATATGCAAAAAGGAGGTCCACCCACACTAATGATATAAAACAGTTAACAGAAGCAGTACAAAAAATAACCATGGAAAGCATAGTGATATGGGGAAAGACTCCTAAATTTAAATTACCCATACAAAAGGAAACATGGGAGACATGGTGGGCGGAGTATTGGCAGGCTACCTGGATTCCTGAGTGGGAGTTTGTCAATACCCCTCCTCTAGTAAAACTGTGGTACCAGTTAGAAAAAGAACCCATAGCAGGAGCAGAAACTTTCTATGTAGATGGGGCAGCTAATAGAGAGACTAAACTAGGAAAGGCAGGGTATGTCACTGACAGAGGAAGACAAAAAATTGTCTCCCTGACGGAGACAACAAATCAAAAGACTGAATTACATGCAATCTATTTGGCTTTACAGGATTCAGGATTAGAAGTGAACATAGTGACAGATTCACAGTATGCATTAGGAATCATTCAAGCACAACCAGAAAGGAGTGAATCAGAGATAGTCAATCAAATAATAGAAAAATTAATAGAAAAGGAAAGGGTCTACCTATCATGGGTACCAGCACACAAAGGGATTGGAGGAAATGAACAAGTAGACAAATTAGTCAGTTCTGGAATCAGGAAAGTGCTATTTTTAGATGGGATAGATAAGGCTCAAGAGGAACATGAAAGATATCACAGCAATTGGAGAGCAATGGCTCATGACTTTAATCTACCACCTGTAGTAGCAAAAGAAATAGTAGCTAGCTGTGATAAATGTCAGCTAAAAGGGGAAGCCATGCATGGACAAGTAGACTGTAGTCCAGGAATATGGCAACTAGATTGCACACATCTTGAAGGAAAAGTTATCCTGGTGGCAGTCCATGTGGCCAGTGGCTATATAGAAGCAGAAGTCATCCCAACAGAAACAGGACAGGATACAGCATACTTTATATTAAAACTAGCAGGAAGATGGCCAGTAAAAGTAATACATACAGACAATGGGCCCAATTTCATCAGTGCAACAGTTAAGGCAGCCTGTTGGTGGGCAGGTATCCAACAAGAATTTGGGATTCCCTACAATCCCCAAAGTCAAGGAGTAGTGGAATCTATGAATAAAGAATTAAAGAAAATCATAGGGCAGGTAAGAGATCAAGCTGAACACCTTAAGACAGCAGTACAAATGGCAGTATTCATTCACAATTTTAAAAGAAAAGGGGGGATTGGGGGATACAGTGCAGGGGAAAGAATAATAGACATAATAGCAACAGATATACAAACTAAAGAACTACAAAGACAAATTACAAAAATTCAAAATTTTCGGGTTTATTACAGGGACAGCAGAGATCCAATTTGGAAAGGACCAGCAAAACTCCTTTGGAAAGGTGAAGGGGCAGTAGTAATACAAGACAATAGTGACATAAAGGTAGTACCAAGAAGAAAAGCAAAGATCATTAGGGATTATGGAAAACAGATGGCAGGTGATGATTGTGTGGCAGGTAGACAGGATGAGGATTAGAACATGGAACAGTTTAGTTAAACATCATATGTATATTTCAAGGAAAGCTAAAGGTTGGGTCTATAAACATCACTATGAAAGCAGAAATCCAAGAATAAGTTCAGAAGTACACATCCCGCTAGGGGAGGCTAGAATAATAGTAAGAACATATTGGGGTCTGCACATAGGAGAAAAAGACTGGCACTTGGGTCATGGAGTCTCCATAGAATGGAGGCAAAACAGGTATCATACACAAATAGACCCTGATCTGGCAGACCATCTAATCCATCTGTATTATTTTGACTGTTTTTCAGAATCTGCCATAAGGAAAGCCATAATAGGAGAAATAGTTAGTCCTAGGTGTGAATATCAAGCAGGACATAACAAGGTAGGGTCTCTGCAATATTTGGCATTGAAAGCAGTAGTAGCTTCAACAAGGACAAAGCCACCTTTGCCTAGTGTTAGGAAATTAGTAGAGGATAGATGGAACAAGCCCCAGAAGACCAAGGGCCACAGAGGGAGCCATACAATGAATGGATGTTAGAACTGTTAGAGGAGCTCAAGCAGGAAGCTGTTAGACATTTCCCTAGGCACTGGCTACATGGCCTAGGACAATACATCTATAATACCTATGGGGATACCTGGGAAGGAGTTGAAGTTATCATAAGATATCTGCAACAACTACTGTTTGTCCATTTCAGAATTGGGTGCCAACATAGCAGGATAGGCATTATTCGAAGAAGAAGAGTAAGGGATGGAGCCAGTAGACCCTAAACTAGAGCCCTGGAACCATCCGGGAAGTCAGCCTAAAACTGCTTGTACCAAATGTTATTGTAAACGCTGTTGCTATCATTGCCAGTTGTGCTTTATAAACAAAGGCTTAGGCATCTCCTACGGCAGGAAGAAGCGACGACCCCGACGAAAGCCTTCTCCAAGCAATAAGGACCATCAAAATCCTATACCAAAGCAGTAAGTAGTAGTAATTAATATATGTAATGTTACCTTTAGTAATATTGGCAATAGTAGGACTGATAGTAGCTTTAATCTTAGCAATAGTTGTATGGACTATAGTATTCATAGAATATAAGAAAATTAAGAAGCAAAGGAAAATAGACTGGTTAATCAAAAGAATAAGTGAGAGAGCAGAAGACAGTGGCAATGAGAGTGATGGGGACACAGAGGAACTATCAGCACTTGTGGAGAGGGGGCATCTTGATTTTGGGGATGTTAATAATGTGTAAAGCTACAGATTTGTGGGTCACAGTATACTATGGAGTACCTGTGTGGAAAGATGCAGATACCATCCTATTTTGTGCATCAGATGCTAAAGCATATGATACAGAAGTGCATAATGTATGGGCCACACATGCCTGTGTACCCACAGACCCCAACCCACAAGAAATAAACCTGGAAAATGTAACAGAAAATTTTAATATGTGGAAAAATAACATGGTAGAGCAGATGCAAGAAGATATAATCAGCTTATGGGATCAAAGCCTAAAGCCATGTGTAAAATTAACCCCGCTCTGCGTCATTTTAAATTGTAGCAATGCCAATACCAGCACCCATAGCAATAGCAGTAGCACCCAGAGCCCCATTAATGAAGAAATAAAAAACTGCTCTTACAATACTACCACAATACTAAGAGATAAGACACAAAAAGTTTATTCACTGTTTTATAGACTTGATGTAGTACAACTTGATGAAAGTGAAAATAAGAATACATCAGGTAGTAATACTCTGTATAGACTAATAAATTGTAATACCTCAACCATCACACAAGCGTGTCCAAAGGTAACCTTTGAGCCAATTCCTATACATTATTGTGCCCCAGCTGGTTTTGCGATTCTAAAGTGTAAGGATCCGAGATTCAATGGAACAGGGTCATGCAAGAATGTTAGCTCAGTACAATGTACACATGGAATTAAACCAGTAGCATCAACTCAACTGCTGTTGAATGGCAGTCTAGCAGAAGGAGGGAAAATAATGATTAGATCTGAAAATATTACAAACAATGCCAAAAACATAATAGTTCAGTTTACTAAGCCTGTACTAATTACTTGTATCAGACCCAACAACAATACAAGAAAAAGTATACGCTTTGGACCAGGACAAGCCTTCTATACAAAGATAATAGGAGATATAAGACAAGCACATTGCAACATTAGTGGAGCAGAATGGAATAAGACTTTATATCGGGTAGCTAAAAAATTAAGAGACCTATTTAACAAGACAATAATTTTTAAACCATCCTCCGGAGGGGACCCAGAAATTACAACACACAGCTTTAATTGTAGAGGGGAATTTTTCTACTGCAATACAACAGGCCTGTTTAATGGTACGTGGTGGAACAATGGTACGTGGAACGGGCCCTACACACCTAATAACACCAATGGAAGTATAATCCTCCCATGCAGAATAAAACAAATTATAAACATGTGGCAGAGAGTAGGAAGAGCAATGTATGCCCCTCCCATTGCAGGAATAATAAAGTGTACATCAAACATTACAGGAATAATATTGACAAGAGATGGTGGTAACAATGGGACTAATGAGACCTTCAGACCTGGAGGAGGAGATATGAGGGACAATTGGAGAAGTGAATTATATAAATATAAAGTAGTAAAACTTGAACCACTAGGAGTAGCACCTACCAGGGCAAAAAGAAGAGTGGTGGAGAGAGAAAAAAGAGCAGTTGGACTGGGAGCTGTCTTCCTTGGGTTCTTGGGAGCAGCAGGAAGCACTATGGGCGCGGCGTCACTAACGCTGACGGTACAGGCCAGACAATTATTGTCTGGTATAGTGCAACAGCAAAGCAATTTGCTGCAGGCTATAGAAGCTCAACAGCATCTGTTGAAACTCACAGTCTGGGGCATTAAACAGCTCCAGGCGAGGGTCCTGGCTGTGGAAAGATACCTAAAGGATCAACAGCTCCTGGGAATTTGGGGCTGCTCTGGAAAACTCATCTGCGCCACTACTGTGCCCTGGAACACTAGTTGGAGTAATAAGTCTCAGGATGAGATTTGGGACAACATGACCTGGTTGCAATGGGATAAAGAAATTAGCAATTACACAAACATAATATATAGGTTACTTGAAGAATCGCAAAACCAGCAGGAAAAGAATGAGCAAGACTTATTGGCATTAGACAAATGGGCAGATTTGTGGAGTTGGTTCAACATTTCACACTGGCTGTGGTATATAAGAATATTTATAATGATAGTAGGAGGCTTGATAGGATTAAGAATAGTTTTTGCTATAATTACTGTAGTAAATAGAGTTAGGCAGGGATACTCACCTGTGTCATTTCAGATCCCTACCCCAAGCCCAGAGGGTCCCGACAGGCCCAGAGGAACCGAAGAAGGAGGTGGAGAGCAAGGCAGAGACAGATCGATTCGATTAGTGAACGGGTTCTTCGCACTTGCCTGGGACGACCTACGGAGCCTGTGCCTCTTCAGTTACCACCGCTTGAGAGATTGCATATTGATTGCAGCGAGGACTGTGGAACTTCTGGGACACTGCAGTCTCAAGGGACTGAGACTGGGGTGGGAAGGTCTCAAGAATCTGTGGAATCTTCTGTTATACTGGGGTCGGGAACTGAAGAATAGTGCTATTAGCTTATTTGATACTATAGCAGTAGCAGTAGCTGAGTGGACAGATAGGGTTATAGAAATAGGGCAAAGAGCTTTCAGAGCTATTCTCAACATACCTAGAAGAATCAGACAGGGCTTAGAAAGGGCTTTACTATAAAATGGGGGGCAAGTGGTCAAAAAGGAGCATACCAGGATGGCCTGCTATTAGGGAGAGAATGAGAAGAACTCCTCCAACAGCACAAAGAACAGAAGCAGTGTCTCCAGCAGCACCAGGAGTAGGAGCAGTGTCTCAAGATTTAGCTACTCATGGAGCAGTCACAAGCAGTAATACAGCAGCTACTAATCCTGATTGCGCCTGGGTGGAAGCGCAAGAAGAGGAGAGTGAAGTAGGCTTCCCAGTCAGGCCACAGGTACCTTTAAGGCCAATGACCTTCAAGGGAGCGTTTGATCTCAGCTTCTTTTTAAAAGAAAAGGGGGGACTGGATGGGTTAATTTACTCCCAGAAAAGACAAGACATCCTTGATATGTGGGTCTACCACACACAAGGCTACTTCCCTGATTGGCAGAATTACACACCAGGGCCAGGGATCAGATACCCATTAACATTTGGATGGTGCTTCAAGCTAGTACCAGTAGAGCCATCTGAGGTAGAAGAAGCTACTCAGGGAGAGAACAACAGCTTATTACACCCTATATGCCAACATGGAGTAGATGACCCTGAAAGAGAAGTGTTAAGATGGGAGTTTGATAGAAGCCTGGCACGGAGACACAGAGCCCGAGAGCTGCATCCGGAGTACTACAAAGACTGCTGACACAGAAGTTGCTGACGGGGACTTTCCGCTGGGGACTTTCCAGGGAGGTGTGGTGTGGGCGGAGTTGGGGAGTGGCTAACCCTCAGATGCTGCATATAAGCAGCTGCTTCTCGCATGTACTGGGTCTCTCTTGTTGGACCAGATAGAGCCCGGGAGCTCTCTGGCTAGCAGGGGAACCCACTGCTTAAGCCTCAATAAAGCTTGCCTTGAGAGCTTC
>A2.CY.94.94CY017_41_AF286237_F1.BR.93.93BR020_1_AF005494
TTGAAAAGCGAAAGTAACAGGGACTCGAAAGCGAAAGTTCCAGAGGAGTTCTCTCGACGCAGGACTCGGCTTGCTGAGGTGCACACGGCAAGAGGCGAGGGGCGGCGACTGGTGAGTACGCCTAATATTTTTGACTAGCAGAGGCTAGAAGGAGAGAGATGGGTGCGAGAGCGTCAATATTAAGCGGGGGAAAATTAGATGCTTGGGAGAAAATTCGGTTAAGGCCAGGGGGAAAGAAAAAATATAGACTGAAACATTTGGTATGGGCAAGCAGGGAGCTGGAGAAATTCTCAATTAACCCTGGCCTTTTAGAAACACCAGAGGGATGTAGACAAATAATAAGGCAGTTACAACCAGCTCTCCAAACAGGAACAGAAGAACTTAAATCATTATATAATACAGTAGTAGTCCTCTACTGGGTACATCAAAGGGTAGATGTAAAAGACACCAAGGAAGCTCTAGATAAAATAGAGGAAGAACAAAACAAGCAGAAAACACAGCATGCAGCAGCTGACACAGGGAACAGCAGCAGTCAAAATTATCCCATAGTGCAAAATGCACAAGGGCAAATGGTACACCAGGCTATATCACCTAGGACGTTGAATGCCTGGGTCAAAGTAGTAGAAGAAAAGGCTTTCAGCCCAGAAGTAATACCTATGTTTACAGCATTATCAGAAGGAGCCACCCCACAAGACTTAAATACTATGCTAAACACAGTGGGGGGACATCAAGCAGCTATGCAAATGTTAAAAGATACCATCAATGAGGAAGCTGCAGAATGGGACAGGGTACATCCAGTACATGCAGGGCCTATTCCACCAGGCCAGATGAGAGAACCAAGGGGAAGTGACATAGCAGGAACTACTAGTACCCTTCAGGAACAAATAGGTTGGATGACCAGCGATCCACCCATCCCAGTGGGAGAAATTTATAAAAGATGGATAATCCTGGGATTAAATAAAATAGTAAGAATGTATAGCCCTGTCAGCATTTTGGACATAAGACAAGGGCCAAAAGAACCCTTTAGAGATTATGTGGATAGGTTCTTTAAAACTCTAAGAGCTGAGCAAGCCACACAGGAGGTAAAAAACTGGATGACGGACACCTTGCTGGTCCAAAATGCGAACCCAGATTGTAGATCCATCTTGAGAGCATTAGGACCAGGGGCCTCATTAGAAGAAATGATGACAGCATGTCAGGGAGTGGGAGGACCCAGCCATAAAGCAAGGGTTTTGGCTGAAGCAATGAGCCATGTACAAAGTACAAATACAAACATAATGATGCAGAGAGGCAATTTTAGGGGTCAAAAAAGAATTAAGTGTTTCAACTGTGGCAAGGAAGGACACCTAGCCAGAAATTGCAGGGCCCCTAGGAAAAAGGGCTGCTGGAAATGTGGAAAGGAAGGACATCAAATGAAAGATTGCACTGAGAGACAGGCTAATTTTTTAGGGAAAATTTGGCCTTCCAACAAAGGGAGGCCAGGAAATTTTCCTCAGAGCAGAACAGAGCCAACAGCCCCACCAGCAGAGAACTTGAGAATGGGGGAAGAGATAACCTCCTCCCTGAAGCAGGAACTGGAGACCAGGGAACCATACAATCCTGCAATTTCCCTCAAATCACTCTTTGGCAACGACCCCTTGTTACAGTAAAGATAGAGGGACAGCTAAAAGAAGCTCTATTAGATACAGGAGCAGATGATACAGTGTTAGAAGAAATAAATTTGCCAGGAAAATGGAAACCAAAAATGATAGGGGGAATTGGAGGTTTTATCAAAGTAAGACAATATGATCAGATAGCTATAGAAATTTGTGGAAAAAGGGCCATAGGTACAGTATTAGTAGGACCTACCCCTGTCAACATAATCGGAAGAAATATGTTGGTTCAGCTTGGTTGTACTTTAAATTTTCCAATTAGTCCTATTGAAACTGTACCAGTAAAATTAAAGCCAGGAATGGATGGTCCAAAGGTTAAACAATGGCCATTGACAGAAGAAAAAATAAAAGCATTAACAGAAATCTGTAAAGAAATGGAAAAGGAAGGAAAAATTTCAAAAATTGGGCCTGAAAATCCATACAACACTCCAGTGTTTGCTATAAAGAAAAAAGACAGCACTAAATGGAGAAAATTAGTAGATTTTAGAGAACTCAATAAGAGAACTCAAGACTTCTGGGAAGTTCAGTTAGGAATACCACATCCAGCAGGATTAAAAAAGAAAAAAGCAGTAACAGTACTTGATGTGGGGGACGCATATTTTTCCGTTCCCTTACATGAAGACTTCAGAAAATATACTGCATTCACCATACCTAGTACCAACAATGAGACACCAGGAGTTAGGTATCAGTACAATGTACTTCCACAGGGATGGAAAGGATCACCAGCAATATTCCAGAGTAGCATGACAAAGATCTTAGAGCCCTTTAGATCAAAGAATACAGAATTAATCATCTACCAATACATGGATGACTTGTATGTAGGATCTGACTTAGAAATAGGACAGCATAGAACAAAAATAGAAGAGTTAAGAGAACATCTACTGAAATGGGGATTAACTACACCAGACAAAAAACATCAAAAAGAACCCCCATTCCTTTGGATGGGGTATGAACTCCATCCTGATAAATGGACAGTGCAGCCTATACAATTGCCAGACAAGGACAGCTGGACTGTCAATGATATACAGAAATTAGTAGGGAAATTAAATTGGGCAAGTCAGATTTATGCAGGGATTAAAGTAAAGCAACTGTGTAAACTCCTTAGAGGAGCCAAAGCACTAACAGACATAGTAACACTGACTAAAGAAGCAGAGTTAGAATTAGAAGAGAACAGGGAAATTTTAAAAACCCCTGTACATGGGGTATACTATGACCCATCAAAAGACTTAATAGCAGAAATACAGAAACAAGGGCAAGACCAATGGACATATCAAATTTATCAGGAACCCTTTAAGAATCTGAAAACAGGGAAATATGCAAAAAGGAGGTCCACCCACACTAATGATATAAAACAGTTAACAGAAGCAGTACAAAAAATAACCATGGAAAGCATAGTGATATGGGGAAAGACTCCTAAATTTAAATTACCCATACAAAAGGAAACATGGGAGACATGGTGGGCGGAGTATTGGCAGGCTACCTGGATTCCTGAGTGGGAGTTTGTCAATACCCCTCCTCTAGTAAAACTGTGGTACCAGTTAGAAAAAGAACCCATAGCAGGAGCAGAAACTTTCTATGTAGATGGGGCAGCTAATAGAGAGACTAAACTAGGAAAGGCAGGGTATGTCACTGACAGAGGAAGACAAAAAATTGTCTCCCTGACGGAGACAACAAATCAAAAGACTGAATTACATGCAATCTATTTGGCTTTACAGGATTCAGGATTAGAAGTGAACATAGTGACAGATTCACAGTATGCATTAGGAATCATTCAAGCACAACCAGAAAGGAGTGAATCAGAGATAGTCAATCAAATAATAGAAAAATTAATAGAAAAGGAAAGGGTCTACCTATCATGGGTACCAGCACACAAAGGGATTGGAGGAAATGAACAAGTAGACAAATTAGTCAGTTCTGGAATCAGGAAAGTGCTATTTTTAGATGGGATAGATAAGGCTCAAGAGGAACATGAAAGATATCACAGCAATTGGAGAGCAATGGCTCATGACTTTAATCTACCACCTGTAGTAGCAAAAGAAATAGTAGCTAGCTGTGATAAATGTCAGCTAAAAGGGGAAGCCATGCATGGACAAGTAGACTGTAGTCCAGGAATATGGCAACTAGATTGCACACATCTTGAAGGAAAAGTTATCCTGGTGGCAGTCCATGTGGCCAGTGGCTATATAGAAGCAGAAGTCATCCCAACAGAAACAGGACAGGATACAGCATACTTTATATTAAAACTAGCAGGAAGATGGCCAGTAAAAGTAATACATACAGACAATGGGCCCAATTTCATCAGTGCAACAGTTAAGGCAGCCTGTTGGTGGGCAGGTATCCAACAAGAATTTGGGATTCCCTACAATCCCCAAAGTCAAGGAGTAGTGGAATCTATGAATAAAGAATTAAAGAAAATCATAGGGCAGGTAAGAGATCAAGCTGAACACCTTAAGACAGCAGTACAAATGGCAGTATTCATTCACAATTTTAAAAGAAAAGGGGGGATTGGGGGATACAGTGCAGGGGAAAGAATAATAGACATAATAGCAACAGATATACAAACTAAAGAACTACAAAGACAAATTACAAAAATTCAAAATTTTCGGGTTTATTACAGGGACAGCAGAGATCCAATTTGGAAAGGACCAGCAAAACTCCTTTGGAAAGGTGAAGGGGCAGTAGTAATACAAGACAATAGTGACATAAAGGTAGTACCAAGAAGAAAAGCAAAGATCATTAGGGATTATGGAAAACAGATGGCAGGTGATGATTGTGTGGCAGGTAGACAGGATGAGGATTAGAACATGGAACAGTTTAGTTAAACATCATATGTATATTTCAAGGAAAGCTAAAGGTTGGGTCTATAAACATCACTATGAAAGCAGAAATCCAAGAATAAGTTCAGAAGTACACATCCCGCTAGGGGAGGCTAGAATAATAGTAAGAACATATTGGGGTCTGCACATAGGAGAAAAAGACTGGCACTTGGGTCATGGAGTCTCCATAGAATGGAGGCAAAACAGGTATCATACACAAATAGACCCTGATCTGGCAGACCATCTAATCCATCTGTATTATTTTGACTGTTTTTCAGAATCTGCCATAAGGAAAGCCATAATAGGAGAAATAGTTAGTCCTAGGTGTGAATATCAAGCAGGACATAACAAGGTAGGGTCTCTGCAATATTTGGCATTGAAAGCAGTAGTAGCTTCAACAAGGACAAAGCCACCTTTGCCTAGTGTTAGGAAATTAGTAGAGGATAGATGGAACAAGCCCCAGAAGACCAAGGGCCACAGAGGGAGCCATACAATGAATGGATGTTAGAACTGTTAGAGGAGCTCAAGCAGGAAGCTGTTAGACATTTCCCTAGGCACTGGCTACATGGCCTAGGACAATACATCTATAATACCTATGGGGATACCTGGGAAGGAGTTGAAGTTATCATAAGATATCTGCAACAACTACTGTTTGTCCATTTCAGAATTGGGTGCCAACATAGCAGGATAGGCATTATTCGAAGAAGAAGAGTAAGGGATGGAGCCAGTAGACCCTAAACTAGAGCCCTGGAACCATCCGGGAAGTCAGCCTAAAACTGCTTGTACCAAATGTTATTGTAAACGCTGTTGCTATCATTGCCAGTTGTGCTTTATAAACAAAGGCTTAGGCATCTCCTACGGCAGGAAGAAGCGACGACCCCGACGAAAGCCTTCTCCAAGCAATAAGGACCATCAAAATCCTATACCAAAGCAGTAAGTAGTAGTAATTAATATATGTAATGTTACCTTTAGTAATATTGGCAATAGTAGGACTGATAGTAGCTTTAATCTTAGCAATAGTTGTATGGACTATAGTATTCATAGAATATAAGAAAATTAAGAAGCAAAGGAAAATAGACTGGTTAATCAAAAGAATAAGTGAGAGAGCAGAAGACAGTGGCAATGAGAGTGATGGGGACACAGAGGAACTATCAGCACTTGTGGAGAGGGGGCATCTTGATTTTGGGGATGTTAATAATGTGTAAAGCTACAGATTTGTGGGTCACAGTATACTATGGAGTACCTGTGTGGAAAGATGCAGATACCATCCTATTTTGTGCATCAGATGCTAAAGCATATGATACAGAAGTGCATAATGTATGGGCCACACATGCCTGTGTACCCACAGACCCCAACCCACAAGAAATAAACCTGGAAAATGTAACAGAAAATTTTAATATGTGGAAAAATAACATGGTAGAGCAGATGCAAGAAGATATAATCAGCTTATGGGATCAAAGCCTAAAGCCATGTGTAAAATTAACCCCGCTCTGCGTCATTTTAAATTGTAGCAATGCCAATACCAGCACCCATAGCAATAGCAGTAGCACCCAGAGCCCCATTAATGAAGAAATAAAAAACTGCTCTTACAATACTACCACAATACTAAGAGATAAGACACAAAAAGTTTATTCACTGTTTTATAGACTTGATGTAGTACAACTTGATGAAAGTGAAAATAAGAATACATCAGGTAGTAATACTCTGTATAGACTAATAAATTGTAATACCTCAACCATCACACAAGCGTGTCCAAAGGTAACCTTTGAGCCAATTCCTATACATTATTGTGCCCCAGCTGGTTTTGCGATTCTAAAGTGTAAGGATCCGAGATTCAATGGAACAGGGTCATGCAAGAATGTTAGCTCAGTACAATGTACACATGGAATTAAACCAGTAGCATCAACTCAACTGCTGTTGAATGGCAGTCTAGCAGAAGGAGGGAAAATAATGATTAGATCTGAAAATATTACAAACAATGCCAAAAACATAATAGTTCAGTTTACTAAGCCTGTACTAATTACTTGTATCAGACCCAACAACAATACAAGAAAAAGTATACGCTTTGGACCAGGACAAGCCTTCTATACAAATGAAATAATAGGGGACATAAGACAAGCACATTGTAATATCAACAAAACATTATGGAATGACACTTTACAAAAGGTAGCTGAACAATTAAGAGAGAAATTCCCTAAGAAAACCATAATCTTTACTAACTCCTCAGGAGGGGACCCAGAAATTACAACACTTAGTTTTAATTGTGCAGGAGAATTTTTCTATTGCAATACAACAGGCCTGTTTAATGGTACGTGGTGGAACAATGGTACGTGGAACGGGCCCTACACACCTAATAACACCAATGGAAGTATAATCCTCCCATGCAGAATAAAACAAATTATAAACATGTGGCAGAGAGTAGGAAGAGCAATGTATGCCCCTCCCATTGCAGGAATAATAAAGTGTACATCAAACATTACAGGAATAATATTGACAAGAGATGGTGGTAACAATGGGACTAATGAGACCTTCAGACCTGGAGGAGGAGATATGAGGGACAATTGGAGAAGTGAATTATATAAATATAAAGTAGTAAAACTTGAACCACTAGGAGTAGCACCTACCAGGGCAAAAAGAAGAGTGGTGGAGAGAGAAAAAAGAGCAGTTGGACTGGGAGCTGTCTTCCTTGGGTTCTTGGGAGCAGCAGGAAGCACTATGGGCGCGGCGTCACTAACGCTGACGGTACAGGCCAGACAATTATTGTCTGGTATAGTGCAACAGCAAAGCAATTTGCTGCAGGCTATAGAAGCTCAACAGCATCTGTTGAAACTCACAGTCTGGGGCATTAAACAGCTCCAGGCGAGGGTCCTGGCTGTGGAAAGATACCTAAAGGATCAACAGCTCCTGGGAATTTGGGGCTGCTCTGGAAAACTCATCTGCGCCACTACTGTGCCCTGGAACACTAGTTGGAGTAATAAGTCTCAGGATGAGATTTGGGACAACATGACCTGGTTGCAATGGGATAAAGAAATTAGCAATTACACAAACATAATATATAGGTTACTTGAAGAATCGCAAAACCAGCAGGAAAAGAATGAGCAAGACTTATTGGCATTAGACAAATGGGCAGATTTGTGGAGTTGGTTCAACATTTCACACTGGCTGTGGTATATAAGAATATTTATAATGATAGTAGGAGGCTTGATAGGATTAAGAATAGTTTTTGCTATAATTACTGTAGTAAATAGAGTTAGGCAGGGATACTCACCTGTGTCATTTCAGATCCCTACCCCAAGCCCAGAGGGTCCCGACAGGCCCAGAGGAACCGAAGAAGGAGGTGGAGAGCAAGGCAGAGACAGATCGATTCGATTAGTGAACGGGTTCTTCGCACTTGCCTGGGACGACCTACGGAGCCTGTGCCTCTTCAGTTACCACCGCTTGAGAGATTGCATATTGATTGCAGCGAGGACTGTGGAACTTCTGGGACACTGCAGTCTCAAGGGACTGAGACTGGGGTGGGAAGGTCTCAAGAATCTGTGGAATCTTCTGTTATACTGGGGTCGGGAACTGAAGAATAGTGCTATTAGCTTATTTGATACTATAGCAGTAGCAGTAGCTGAGTGGACAGATAGGGTTATAGAAATAGGGCAAAGAGCTTTCAGAGCTATTCTCAACATACCTAGAAGAATCAGACAGGGCTTAGAAAGGGCTTTACTATAAAATGGGGGGCAAGTGGTCAAAAAGGAGCATACCAGGATGGCCTGCTATTAGGGAGAGAATGAGAAGAACTCCTCCAACAGCACAAAGAACAGAAGCAGTGTCTCCAGCAGCACCAGGAGTAGGAGCAGTGTCTCAAGATTTAGCTACTCATGGAGCAGTCACAAGCAGTAATACAGCAGCTACTAATCCTGATTGCGCCTGGGTGGAAGCGCAAGAAGAGGAGAGTGAAGTAGGCTTCCCAGTCAGGCCACAGGTACCTTTAAGGCCAATGACCTTCAAGGGAGCGTTTGATCTCAGCTTCTTTTTAAAAGAAAAGGGGGGACTGGATGGGTTAATTTACTCCCAGAAAAGACAAGACATCCTTGATATGTGGGTCTACCACACACAAGGCTACTTCCCTGATTGGCAGAATTACACACCAGGGCCAGGGATCAGATACCCATTAACATTTGGATGGTGCTTCAAGCTAGTACCAGTAGAGCCATCTGAGGTAGAAGAAGCTACTCAGGGAGAGAACAACAGCTTATTACACCCTATATGCCAACATGGAGTAGATGACCCTGAAAGAGAAGTGTTAAGATGGGAGTTTGATAGAAGCCTGGCACGGAGACACAGAGCCCGAGAGCTGCATCCGGAGTACTACAAAGACTGCTGACACAGAAGTTGCTGACGGGGACTTTCCGCTGGGGACTTTCCAGGGAGGTGTGGTGTGGGCGGAGTTGGGGAGTGGCTAACCCTCAGATGCTGCATATAAGCAGCTGCTTCTCGCATGTACTGGGTCTCTCTTGTTGGACCAGATAGAGCCCGGGAGCTCTCTGGCTAGCAGGGGAACCCACTGCTTAAGCCTCAATAAAGCTTGCCTTGAGAGCTTC
>A2.CD.97.97CDKFE4_AF286240_F2.CM.95.MP255_AJ249236
CCAGCCAAAATTACCCTATAGTGCAGAATGCACAAGGGCAAATGGTACACCAGGCCCTATCACCTAGGACTTTAAATGCATGGGTCAAAGTAGTAGAAGAAAAGGCTTTCAGCCCAGAAGTAATACCCATGTTTTCAGCATTATCAGAAGGAGCCACCCCACAAGATTTAAATACTATGCTAAACACGGTGGGGGGACATCAAGCAGCTATGCAAATATTAAAAGATACCATCAATGAGGAAGCTGCAGAATGGGACAGGCTACATCCAGTACATGCAGGGCCTATTCCACCAGGCCAGATGAGAGAACCAAGGGGAAGTGACATAGCAGGAACTACTAGTACCCTTCAGGAACAAATAGGATGGATGACTAGCAACCCACCTATCCCAGTGGGAGAAATCTATAAAAGATGGATAATCCTGGGATTAAATAAGATAGTAAGAATGTATAGCCCTGTCAGTATTTTGGACATAAGACAAGGGCCAAAAGAACCCTTTAGAGACTATGTAGATAGGTTCTTTAAAACTCTCAGAGCTGAGCAAGCTACACAAGAGGTAAAAAACTGGATGACAGACACCTTGCTGGTCCAAAATGCGAACCCAGATTGTAAATCAATCCTGAAAGCATTAGGACCAGGGGCTACATTAGAAGAAATGATGACAGCATGTCAGGGAGTGGGGGGACCCGGCCATAAAGCAAGGGTTTTGGCTGAAGCAATGAGCCAATTACAAAATGCAACTCCAAACATAATGATGCAGAAAGGCAATTTTAGGGGTCAAAAAAGAATCAAATGTTTCAACTGTGGCAAGGAAGGACACCTAGCCAGAAATTGCAGGGCCCCTAGGAAAAAGGGCTGCTGGAAATGTGGGAAGGAAGGACATCAGATGAAAGACTGCACTGAGAGACAGGCTAATTTTTTAGGGAAAATTTGGCCTCCCAACAGAGGGAGGCCAGGAAATTTTCCCCAGAGCAGACCAGAGCCAACAGCCCCACCAGCAGAGGACTTTGGAATGGGGGAAGAGACAAAAAACAGGGAACCGCATACTCCTGCAATTTCCCTCAAATCACTCTTTGGCAGCGACCTCTTGTCACAGTAAAAATAGAAGGACAGCTAAGAGAAGCTCTATTAGATACAGGAGCAGATGATACAGTGTTAGAAGACATAAATTTGCCAGGAAAATGGAAACCAAAAATGATAGGGGGAATTGGAGGTTTTATCAAAGTAAGACAATATGATCAGATAGCTATAGAAATTTGTGGAAAAAGGGCCATAGGTACAGTATTAGTAGGACCTACACCTGTCAACATAATTGGAAGAAATATGTTGGTTCAGCTTGGTTGTACTTTAAATTTTCCAATAAGTCCTATTGAAACTGTACCAGTAAAATTAAAGCCAGGAATGGATGGCCCAAAGGTTAAACAATGGCCATTGACAGAAGAAAAAATAAAAGCATTAACAGAAATTTGTGGAGAAATGGAAAAGGAAGGAAAAATTTCAAAAATTGGGCCTGAAAACCCATACAACACTCCAGTGTTTGCTATAAAGAAAAAAGACAGCACTAAATGGAGAAAATTAGTAGATTTCAGAGAACTCAATAAGAGAACTCAAGACTTTTGGGAAGTTCAGTTAGGAATACCACATCCAGCAGGATTAAAAAAGAAAAAATCAGTAACAGTACTAGATGTGGGGGACGCATATTTTTCCGTTCCCTTAGATGAAGACTTCAGAAAGTATACTGCATTCACCATACCTAGTATAAACAATGAGTCACCAGGAATTAGGTATCAGTACAATGTACTTCCACAGGGATGGAAAGGATCACCATCAATATTCCAGAGTAGCATGACAAAAATTTTAGAGCCCTTTAGATCAAAATATCCAGAGATGGTTATATACCAGTACATGGATGACTTGTATGTAGGATCTGATTTGGAAATAGGTCAGCATAGAGCAAAAATAGAGGAATTAAGGGCTCATTTATTAAGATGGGGATTTACTACACCAGACAAAAAACATCAGAAAGAACCCCCATTTCTTTGGATGGGGTATGAACTCCATCCTGACAAATGGACAGTACAGCCTATACAATTGCCAGAAAAGAGCAGCTGGACTGTCAATGATATACAGAAGTTAGTAGGAAAACTAAATTGGGCAAGTCAGATTTATCCAGGGATTAGAATAAAACACTTATGTAGACTCCTTAGGGGAACCAAAGCACTAACAGACATAGTAACACTGACTAAAGAAGCAGAATTAGAATTGGAAGAGAACAGGGAGATTCTAAAAAACCCTGTACATGGGGTATACTATGACCCATCAAAAGACTTAATAGCAGAAATACAGAAACAAGGGCAAGATCAATGGACATATCAAATTTATCAAGAGCCATTTAAAAATCTAAAAACAGGGAAATATGCAAAAAAGAAATCCACACACACTAATGATGTAAAACAATTAACAGAAGCAGTACAAAAAATAGCCATAGAAAGCATAGTAATATGGGGAAAGACTCCTAAATTTAGATTACCCATACAAAAAGAAACATGGGAGACATGGTGGACGGAGTATTGGCAGGCTACCTGGATTCCTGAGTGGGAGTTTGTCAATACCCCTCCTCTAGTAAAACTATGGTACCAATTAGAAACAGAACCCCTAGCAGGAGCAGAAACTTTCTATGTAGATGGGGCAGCTAATAGAGAGACTAAACTAGGAAAGGCAGGGTATGTCACTGACAGAGGAAGACAAAAAATTGTCTCCCTGACGGAAACAACAAATCAAAAGACTGAATTACATGCAATCTATTTGGCTTTACAGGATTCAGGATTAGAAGTGAACATAGTGACAGATTCACAGTATGCATTAGGAATCATTCAGGCACAACCAGATAGGAGTGAATCAGAGTTAGTCAATCAAATAATAGAAAAGTTAATAGAAAAGGAAAGGGTCTACCTGGCATGGGTACCAGCACACAAAGGGATTGGAGGAAATGAACAGGTAGATAAATTAGTCAGTTCTGGAATCAGGAAAGTGCTATTTTTAGATGGGATAGATAAGGCTCAAGAAGAACATGAAAGATATCACAGTAATTGGAGAGCAATGGCTCAGGACTTTAATCTGCCACCTATAGTAGCAAAAGAAATAGTAGCTAGCTGTGATAAGTGTCAGCTAAAAGGGGAAGCCATGCATGGACAAGTAGATTGTAGTCCAGGAATATGGCAACTAGATTGTACACATCTAGAAGGAAAAGTTATCCTGGTAGCAGTCCATGTAGCCAGTGGCTACATAGAAGCAGAAGTTATTCCAGCAGAGACAGGACAGGAAACAGCATACTTTATATTAAAATTAGCAGGAAGATGGCCAGTAAAAGTGATACATACAGACAATGGGCCCAATTTCACTAGTGCAACAGTCAAGGCAGCCTGTTGGTGGGCAGGTGTCCAACAAGAATTTGGGATTCCCTACAATCCCCAAAGTCAAGGAGTAGTAGAATCTATGAATAAAGAATTAAAGAGAATCATAGGGCAGATAAGAGATCAAGCTGAACACCTTAAGACAGCAGTACAAATGGCAGTATTCATTCACAATTTTAAAAGAAAAGGGGGGATTGGGGGATACAGTGCAGGGGAAAGAATAATAGACATAATAGCAACAGATATACAAACTAAAGAATTACAAAAACAAATTATAAAAATTCAAAATTTTCGGGTTTATTACAGGGACAGCAGGGATCCAATTTGGAAAGGACCAGCAAAACTCCTCTGGAAAGGTGAAGGGGCAGTAGTAATACAAGACAACAGTGATATCAAGGTAGTACCAAGAAGAAAAGCAAAGATCATCAGGGATTATGGAAAACAGATGGCAGGTGATGATTGTGTGGCATGTAGACAGGATGAGGATTAGAACATGGAACAGTTTAGTAAAACATCATATATATGTTTCAAGGAAAGCTAAAGATTGGTCCTATAGACATCACTATGAAAGCAGACATCCAAAAGTAAGTTCAGAAGTACACATCCCGCTAGGGGAGGCTAGATTAGTAGTAAGAACATATTGGGGTCTGCAACCAGGAGAACAAGCCTGGCACTTGGGGCATGGGGTCTCCATAGAATGGAGGCAGAAAAGGTATAGTACACAAATAGACCCTGATCTGGCAGATCATCTAATCCATCTGTATTATTTTGACTGTTTTTCAGAATCTGCCATAAGGAAAGCCATATTAGGAGAAATAGTTAGCCCTAGGTGTGAATATCAAGCAGGACATAACAAGGTAGGATCGCTGCAGTACTTGGCATTGAAAGCATTAGTAGCTCCAACAAGGGCAAAGCCACCTTTACCTAGTGTTAAGAAATTAGTAGAGGATAGATGGAACAAGCCCCAGAAGACCAGGGGCCACAGAGGGAGCCATACAATGAATGGGTGTTAGAACTGTTAGAAGAGCTCAAGCAGGAGGCTGTTAGACATTTCCCTGGGCAGTGGCTACACGGCCTAGGACAACATATCTATAATACCTATGGGGATACTTGGGAAGGAGTTGAAGCTATAACAAGAACTCTGCAACAACTACTGTTTGTCCATTTCAGAATGGGGTGCCATCATAGCAGGATAGGTGTTACGCGACAGAGGAGAGCAAGGAATGGATCCAGTAGACCCTAAATTAGAGCCCTGGAACCATCCGGGAAGTCAGCCTAAAACTGCTTGTACCAAGTGTTATTGTAAAAAGTGTTGCTATCATTGCCCAGTGTGCTTTCTAAACAAGGGCTTAGGCATCTCCTATGGCAGGAAGAAGCGGAGACACCGACGAGGACCTGCTCAAAGCAGTAAGAATCATCAAAATCCTGTACCAAAGCAGTAAGTAGTAGTAATTAATAGATGTAATGATACCTTTAGCAATTTTGTCAATAGTAGGGCTGATAGTAGCATTAATCTTAGCAATAGTTATATGGACTATAGTATTTATAGAATATAGGAAAATTCAGAAGGAAAGGAAAATAGACAGGCTAATCAAGAGAATAAGTGAAAGAGCAGAAGACAGTGGCAATGAGAGTGATGGGGATACAGAGGAATTGTCCACCCTTATGGGGGTGGGAATCTTGCTTTTT
>A2.CD.97.97CDKTB48_AF286238_G.ES.00.X558_AF423760
TTTTTCGAAGCGAAGTACCAGGGAAGTTCTCTCGACGCAAGACTCGGCTTGCTGAGGTGCACACGGCAAGAGGCGAGAAGCGACGGCTGGTGAGTACGCCTAAAATTTTTGACTAGCGGAGGCTAGAAGGAGAGAGATGGGTGCGAGAGCGTCAGTATTGAGCGGCGGAAAATTAGAAGCTTGGGAGAAAATTCGGTTAAGGCCAGGGGGAAAGAAAAAATATAGACTGAAACATTTAGTATGGGCAAGCAGGGAGCTGGAAAAATTCTCAATCAACCCCAGCCTTTTAGAAACAGAAACAGGATGTAGACGAATATTTGGGCAATTACAACCAGCTCTCGAGACAGGAACAGAAGAACTTAGATCATTATATAATACAATAGCAGTCCTCTACTTTGTTCATCAAAAGATAGAGGTAAAAGACACCAAGGAAGCTCTAGATAAAATAGAGGAAGAACAAAACAAATGCAAGCAGAAGACACAGCAGGCAGCAGCTGACACAGGAAGCAGCAGCAGTCAAAATTACAGAGGTAGCAGCAGTCAAAATTACCCTATAGTGCAAAATGCACAAGGGCAAATGGTACACCAGGCCGTGTCACCTAGGACTTTGAATGCATGGGTCAAAGTAGTTGAAGAGAAGGCTTTTAGCCCAGAAGTAATACCCATGTTTACAGCATTATCAGAAGGAGCCACCCCACAAGACTTAAATACTATGCTAAACACAGTGGGGGGACATCAAGCAGCTATGCAAATGTTAAAAGATACCATCAATGAGGAAGCTGCAGAATGGGACAGGTTACATCCAGTACAGGCAGGGCCTATTCCACCAGGCCAGATGAGAGAACCAAGGGGAAGTGACATAGCGGGAGCTACTAGTAACCTTCAGGAACAAATAGGATGGATGACCAGCAACCCACCTATTCCAGTGGGAGAAATCTATAAAAGATGGATAATCCTGGGATTAAATAAAATAGTAAGAATGTATAGCCCTGTCAGCATTTTGGACATAAAACAAGGGCCAAAAGAACCCTTTAGAGACTATGTAGATAGGTTCTTTAAAACTCTCAGAGCTGAGCAAGCTACACAGGAGGTAAAAAATTGGATGACAGACACCTTGCTGGTCCAAAATGCAAACCCAGATTGTAAATCCATCTTGAGGGCATTAGGACCAGGGGCTACATTAGAAGAAATGATGACAGCATGTCAGGGAGTGGGAGGACCCGGCCATAAAGCAAGGGTTTTAGCTGAAGCAATGAGCCAAGTACAAAATACAAACATAATGATACAGAGAGGCAATTTTAAGGGTCAAAAAAGAATTAAGTGTTTCAACTGTGGCAAGGAAGGACACCTAGCTAGAAATTGCAGGGCCCCTAGGAAAAAGGGCTGCTGGAAATGTGGGAAGGAAGGACATCAAATGAAAGACTGCACTGAGAGACAGGCTAATTTTTTAGGGAAAATTTGGCCTTCCAACAAAGGGAGGCCAGGGAATTTTCCTCAGAGCAGGACAGAGCCAACAGCCCCACCAATGGAGGAAGAGATAACCTCCTCGCTGAAGCAGGAGAACAGGGAGCCGTCCACCCCTGCAATTTCCCTCAAATCACTCTTTGGCAACGACCTCTTGTCACAGTGAAAATAGAAGGACAGCTAAGAGAAGCTTTATTAGATACAGGAGCAGATGATACAGTGTTAGAAGACATAAATCTGCCATGGAAATGGAAACCAAAAATGATAGGGGGAATTGGAGGTTTTATCAAAGTAAGACAATATGATCAGATAGTTATAGAAATTTGTGGAAAAAGGGCTATCGGTACAGTATTAGTAGGACCTACACCTGTCAACATAATTGGAAGAAATATGTTGGTTCAGCTTGGTTGTACTCTAAATTTTCCAATTAGTCCTATTGAAACTGTACCAGTAAAATTGAAGCCAGGAATGGATGGTCCAAAGGTCAAACAATGGCCATTGACAGAAGAAAAAATAAAAGCATTAACAGAAATTTGTAAAGAAATGGAAAAGGAAGGGAAAATTTCAAAAATTGGGCCTGAAAATCCATACAACACTCCAGTGTTTGCTATAAAGAAAAAAGACAGCGATAAATGGAGAAAATTAGTAGATTTCAGAGAACTCAATAAGAGAACTCAAGACTTCTGGGAAGTTCAGTTAGGAATACCACACCCAGCGGGATTAAAAAAGAAAAAATCAGTAACAGTATTAGATGTGGGGGACGCATATTTTTCCGTTCCCCTACATGAAGACTTCAGGAAATATACTGCATTCACCATACCTAGTATAAACAATGAGACACCAGGAATTAGGTATCAGTACAATGTACTTCCACAGGGATGGAAAGGATCACCAGCAATATTCCAGAGTAGCATGACAAAAATCCTAGATCCCTTTAGGGCAAGAAATCCAGAGATGGTCATCTACCAATACATGGATGACTTGTATGTAGGATCTGATTTAGAAATAGATCAGCATAGAGCAAAAATAGAGGAGTTAAGGGCTCATTTATTAAGATGGGGATTTACTACACCAGACAAAAAGCATCAGAAAGAACCTCCATTTCTGTGGATGGGATATGAGCTTCATCCTGACAAGTGGACAGTCCAGCCTATAAAGCTGCCAGAAAAAGACAGCTGGACTGTCAATGATATACAGAAATTAGTAGGAAAGTTAAATTGGGCAAGTCAGATTTATGCAGGGATTAAAGTAAGGCAACTGTGTAAACTCCTTAGAGGAACCAAAGCATTAACAGACATAGTACCACTGACTAGAGAAGCAGAATTAGAATTGGAAGAGAACAGGGAGATTCTAAAAGACCCTGTACATGGGGTATATTATGACCCATCAAAAGACTTAATAGCAGAAATACAGAAACAAGGGCAAGGCCAATGGTCATATCAAATTTATCAAGAACCATTTAAAAATCTAAAAACAGGGAAATATGCAAAAAGGAAGTCCACCCACACCAATGATGTAAAACAATTAACAGAAGCAGTACAAAAAATAGCCACAGAAAGCATAGTAATATGGGGAAAGATTCCTAAATTTAGACTACCCATACAAAAAGAAACATGGGAGACATGGTGGACGGAGTGGTGGCAGGCTACCTGGATTCCTGAGTGGGAGTTTGTCAATACCCCTCCTCTAGTAAAACTATGGTACCAGTTAGAAACAGAACCCATAGCAGGAGCAGAAACTTTCTATGTAGATGGGGCAGCTAATAGAGAGACTAAACTAGGAAAGGCAGGGTATGTCACTGATAGAGGAAGACAAAAAATTGTCCCCTTGACAGAGACAACAAATCAAAAGACTGAATTACATGCAATCTATTTGGCTTTACAGGATTCAGGGTCAGAAGTAAACATAGTAACAGATTCACAGTATGCATTAGGAATCATTCAAGCGCAACCAGATAGCAGTGAATCAGAGTTAGTCAATCAAATAATAGAAAAGTTAATAGAAAAGGAAAGGGTCTACCTGTCATGGGTACCAGCACACAAAGGGATTGGAGGAAATGAACAGGTGGATAAATTAGTCAGTTGTGGAATCAGAAAAGTGTTATTTTTAGATGGGATAGATAAGGCTCAAGAAGAACATGAAAAATATCACAGTAATTGGAGAGCAATGGCTCATGACTTTAATCTGCCACCTATAGTAGCCAAAGAAATAGTAGCCAGCTGTGATAAATGGTCAGGCTAAAAGGGGAAGCCATGCATGGACAAGTAGACTGCAGTCCAGGAATATGGCAACTAGATTGCACACATCTAGAAGGAAAAATTATCGTGGTAGCAGTCCATGTAGCCAGTGGCTATATAGAAGCAGAAGTCATCCCAGCAGAGACAGGACAGGAGACAGCATACTTTCTATTAAAATTAGCAGGAAGATGGCCAGTAAAAGTAATACATACAGACAATGGGCCCAATTTCACCAGTGCAGCAGTTAAGGCAGCCTGTTGGTGGGCAGATGTCAAACAGGAATTTGGGATTCCCTACAATCCCCAAAGTCAAGGAGTAGTGGAATCTATGAATAAAGAATTAAAGAAAATCATAGGGCAGGTAAGAGATCAAGCTGAACATCTTAAGACAGCAGTGCAAATGGCAGTGTTCATCCACAATTTTAAAAGAAAAGGGGGGATTGGGGGATACAGTGCAGGGGAAAGAATAATAGACATAATAGCAACAGATATACAAACTAAAGAATTACAAAAACAAATCATAAAAATTCAAAATTTTCGGGTTTATTACAGGGACAGCAGAGATCCAATTTGGAAAGGACCAGCAAAACTCCTTTGGAAAGGTGAAGGGGCAGTAGTAATACAAGACAATGGTGATATAAAAGTAGTACCAAGAAGAAAAGCAAAGATCATTAGGGATTATGGAAAACAGATGGCAGGTGATGATTGTGTGGCAGGTAGACAGGATGAGGATTAGAACATGGAACAGTCTAGTAAAACATCATATGTATGTGTCAAAGAAAGCTAGAGAGTGGTTCTATAGACATCACTATGAAAGCAGACATCCAAGAGTAAGTTCAGAAGTACACATCCCGCTAAAGGAGGCTAGATTAATAGTAAGAACATATTGGGGTCTGCACCCAGGAGAAAAAGACTGGCACTTGGGTCATGGGGTCTCCATAGAATGGAGGCAGGGAAGGTACAGTACACAAATAGACCCTGATCTGGCAGACCATCTAATCCATCTGTATTATTTTGACTGTTTTTCAGAATCTGCCATAAGGAGAGCCATATTAGGAGAAATAGTTAGGCCTAGATGTGAATATCAAGCAGGACATAATAAGGTAGGGTCTCTGCAATATTTGGCATTGAGAGCATTAGTAGCTTCAACAAGGACAAAGCCACCTTTGCCTAGTGTTAGGAAATTAGTAGAGGATAGATGGAACAAGCCCCAGAAGACCAGGGGCCACCGAGGGAGCCACACAATGAATGGGTGTTAGAACTGTTAGAGGAGCTAAAGCAAGAAGCAGTTAGACATTTCCCTAGGCCGTGGCTACATGGCCTGGGACAACATATCTATAATACCTATGGGGATACTAGGGAGGGAGTTGAAGCTATAGTAAGAATTTTGCAACAACTACTGTTTGTTCATTTCAGAATTGGGTGCCAACATAGCAGAATAGGCATTATTCCAAGAAGAAGAGTAAGGGATGGAGCCAGTAGACCCTAACTTAGAGCCCTGGAACCATCCGGGAAGCCAGCCTAAAACTGCTTGTAACAATTGCTATTGTAAAAAGTGTTGCTATCATTGCCAAAGGTGCTTTCTAAACAAAGGCTTAGGCATCTCCTATGGCAGGAAGAAGCGGAGACCCCGACGAGGACCTGATCAGGGCAATACGGATCATCAAAATCCTGTACCAAAGCAGTAAGTAGTAGTAATCAATATAGGTAATGTCACCTTTAGCAATACTGTCAATAGTAGGACTGGTAGTAGCATCAATTTTAGCAATAGTTGTGTGGACTGTAGTATTTATAGAATATAGAAAGATTAAGAAGCAAAGGAAAATAGACTGGTTACTTGAGAGAATAAGTGAAAGAGCAGAAGACAGTGGCAACGAGAGTGATGGGGACACAGAGGAATTGTCAAAAATGGTGGGAATGGGGAATCTTGGTTTTTGGGATGATAATGATGTGTAAGGCTGCAGATTTGTGGGTCACAGTATACTATGGAGTACCTGTGTGGAGAGATGCAGATACCACCCTATTTTGTGCATCAGACGCTAAAGCATATGCTACAGAAAAGCATAATGTCTGGGCCACACATGCCTGTGTACCCACAGACCCCAACCCACAAGAAGTAAACCTGGCAAATGTAACAGAAGATTTTAACATGTGGAAAAATAACATGGTAGAGCAGATGCATGCAGATATAATCAGTCTATGGGATCAAAGCCTAAAGCCATGTGTAAAATTAACCCCTCTCTGCGTCACTTTAAATTGTAGCAATGCCAACACCACTAACACCAATAGCACTGAAGAAATAAAAAACTGCTCTTACAATATGCCCACAGAACTAAAAGATAAAACACAGAAAGTCTATTCACTGTTTTATGAACTTGATGTAGTACTACTTAATAGAAGTAAGAATAGTAGTTATAGTACTTATAGACTAATAAGTTGTAATACCTCAGTCATCACACAAGCTTGTCCAAAGGTATCCTTTGAGCCAATTCCTATACATTATTGTGCCCCAGCTGGTTATGCGATTCTAAAGTGTAAGGATAAGGAATTCAATGGAAAAGGGTCATGCAGTAATGTTAGCTCAGTACAATGTGCACATGGAATTAGGCCAGTAGCATCAACTCAACTGCTGCTGAATGGCAGTCTAGCAGAAGGAAAGGTAATGATTAGATCTGAAAATATTACAGACAATGCCAAAAACATAATAGTACAGTTTAATAAACCTGTACCAATTAATTGTACCAGACCCAACAACAATACAAGAAAAAGTATACGCTTTGGACCAGGACAGGCCTTCTATACAAATAATAACATAATAGGGGATATAAGACAAGCACATTGTAATATCAGCATAACAGAATGGAATGCCACTCTAAAAAAGGTAGTTGAACAATTAAGAGAACACTTCCCTAATAAAACAATAATCTTTAATAGCTCCTCAGGAGGGGACCTAGAAATTACAACACATAGTTTTAATTGTGGAGGAGAATTTTTCTATTGCAATACAACAGGCCTGTTTAATAGCACATGGGAAAATGGCACTAACAAACAGAATTACACGGAGTCAAATGACACTATAACGCTCCAATGCAGAATAAAACAAATTATAAACATGTGGCAGAGAGTAGGCCGAGCAATGTATGCCCCTCCCATTGCAGGAGTAATAAAGTGTACATCAAACATTACAGGAATGATATTGACAAGAGACGGTGGGAAGAACAGTATTAATGAGACCTTCAGACCTGGAGGAGGAGATATGAGGGACAATTGGAGAAGTGAATTATATAAGTATAAAGTAGTAAAAATTGAACCACTAGGAATAGCACCCACAGAGGCAAGGAGAAGAGTGGTGCAGAGAGAAAAAAGAGCAGTTGGATTGGGAGCTGTTTTCCTTGGGTTCTTGGGAGCAGCAGGAAGCACTATGGGCGCGGCGTCAATAACGCTGACGGTACAGGCCAGACAATTATTGACTGGCATAGTGCAACAGCAAAGCAATTTGCTGAAGGCTATAGAGGCTCAACAACAGATGTTGAGGCTCACAGTCTGGGGCATTAAACAGCTCCAGGCAAGAGTCCTGGCTCTGGAAAGATACCTACAGGATCAACAGCTCCTAGGAATTTGGGGCTGCTCTGGAAAACTCATCTGCGCCACTGATGTGAGATGGAACTCTAGTTGGAGTAATAAGACTCAGGAGCAGATTTGGAAAAACCTGACATGGGTACAATGGGAAAGGGAAATCAGCAATTATACACAACAAATATACAACCTACTTGAAGAATCGCAGAACCAGCAGGAAAAGAATGAACAAGACTTATTGGCATTGGACAAGTGGGCAAGTTTGTGGAATTGGTTTGACATATCAAACTGGCTATGGTATATAAAAATATTTATAATGATAGTAGGAGGTTTGATAGGATTAAGAATAGTTATTGCTATAATTTCTGTAGTAAAAAGAGTTAGGCAGGGATACTCACCATTGTCATTTCAGATCCCTACCCCAAACCCAGAGGGACTCGACAGGCCCGGAAGAATCGAAGAAGAAGGTGGAGAGCAAGGCAGAGACAGATCGATTCGATTAGTGAGCGGATTCTTAGCACTTGCCTGGGACGACCTACGGAGCCTGTGCCTCTTCAGCTACCACCGCTTGAGAGATTGCATCTTGATTGCAGCGAGGATTGTGGAACTTGTGGGACACAGCAGTCTCAAGGGGCTGAGACTGGGGTGGGAAGGCCTCAAACATCTGTGGAATCTTCTGGTATATTGGGGTCAGGAATTGAAGACTAGTGCTATTAGATTGCTTGATACCATAGCAGTAGCAGTAGCTGAGTGGACAGATAGGGTTATAGAAATAGGACAAAGAGCTTGCAGAGCTATCCGCAACATACCTAGAAGAATCAGACAGGGCCTCGAAAGGGCGTTACTATAAAATGGGGGGCAAGTGGTCAAAAAGAACCATAGTGGGATGGCCTGAGATTAGGGAAAGAATGAGACGAACTCCTCCAGCAGCAGAAGGAGTAAGACCAACTCCTCCAGCTGCAGAAGGAGTAGGAGCAGTGTCTCAAGATTTAGCCAGACATGGAGCAGTCACAAGCAGTAATACAGCAGCTAACAATCCTGATTGCGCCTGGCTGGAAGCGCAAGAAGAGGAGGAAGTAGGCTTTCCAGTCAGGCCACAGGTACCTTTAAGGGCGATGACCTACAAGGGAGCTGTAGATCTCAGCCACTTTTTAAAAGAAAAGGGGGGACTGGATGGGCTAATTTACTCCCAGAGAAGACAAGACATCCTTGATCTGTGGGTCTACAACACACAGGGCTACTTCCCTGATTGGCAGAATTACACACCAGGGCCAGGGGCCAGGTTCCCACTAACATTTGGATGGTGCTTCAAGCTAGTACCAGTTGATCCATCTGAGGTAGAAGAGGCTACGGAGGGGGAGAACAACAGTTTATTACACCCCATATGCCAACATGGAGCAGAGGACCCTGAAAGAGAAGTGTTAAAGTGGAAGTTTGATAGTCGCCTGGCGCTGAGACACCTAGCCAGAGAGCAGCATCCGGAGTTCTACAAAGACTGCTGACACAGAAGATGCTGACACAGAAGTTGCTGACAGGGACTTTCCACGGGGACTTTCCGGGGAGGTGTGGTGAGGGCGGAGTTGGGAGTGGCTAACCCTCAGATGCTGCATATAAGCAGCTGCTTTGCGCCTGTACTGGGTCTCTCCTTGTTGGACCAGATAGAGCCTGGGAGCTCTCAGGCTAGCAGGGGAACCCA
>A2.CY.94.94CY017_41_AF286237_H.BE.93.VI997_AF190128
TTGAAAAGCGAAAGTAACAGGGACTCGAAAGCGAAAGTTCCAGAGGAGTTCTCTCGACGCAGGACTCGGCTTGCTGAGGTGCACACGGCAAGAGGCGAGGGGCGGCGACTGGTGAGTACGCCTAATATTTTTGACTAGCAGAGGCTAGAAGGAGAGAGATGGGTGCGAGAGCGTCAATATTAAGCGGGGGAAAATTAGATGCTTGGGAGAAAATTCGGTTAAGGCCAGGGGGAAAGAAAAAATATAGACTGAAACATTTGGTATGGGCAAGCAGGGAGCTGGAGAAATTCTCAATTAACCCTGGCCTTTTAGAAACACCAGAGGGATGTAGACAAATAATAAGGCAGTTACAACCAGCTCTCCAAACAGGAACAGAAGAACTTAAATCATTATATAATACAGTAGTAGTCCTCTACTGGGTACATCAAAGGGTAGATGTAAAAGACACCAAGGAAGCTCTAGATAAAATAGAGGAAGAACAAAACAAGCAGAAAACACAGCATGCAGCAGCTGACACAGGGAACAGCAGCAGTCAAAATTATCCCATAGTGCAAAATGCACAAGGGCAAATGGTACACCAGGCTATATCACCTAGGACGTTGAATGCCTGGGTCAAAGTAGTAGAAGAAAAGGCTTTCAGCCCAGAAGTAATACCTATGTTTACAGCATTATCAGAAGGAGCCACCCCACAAGACTTAAATACTATGCTAAACACAGTGGGGGGACATCAAGCAGCTATGCAAATGTTAAAAGATACCATCAATGAGGAAGCTGCAGAATGGGACAGGGTACATCCAGTACATGCAGGGCCTATTCCACCAGGCCAGATGAGAGAACCAAGGGGAAGTGACATAGCAGGAACTACTAGTACCCTTCAGGAACAAATAGGTTGGATGACCAGCGATCCACCCATCCCAGTGGGAGAAATTTATAAAAGATGGATAATCCTGGGATTAAATAAAATAGTAAGAATGTATAGCCCTGTCAGCATTTTGGACATAAGACAAGGGCCAAAAGAACCCTTTAGAGATTATGTGGATAGGTTCTTTAAAACTCTAAGAGCTGAGCAAGCCACACAGGAGGTAAAAAACTGGATGACGGACACCTTGCTGGTCCAAAATGCGAACCCAGATTGTAGATCCATCTTGAGAGCATTAGGACCAGGGGCCTCATTAGAAGAAATGATGACAGCATGTCAGGGAGTGGGAGGACCCAGCCATAAAGCAAGGGTTTTGGCTGAAGCAATGAGCCATGTACAAAGTACAAATACAAACATAATGATGCAGAGAGGCAATTTTAGGGGTCAAAAAAGAATTAAGTGTTTCAACTGTGGCAAGGAAGGACACCTAGCCAGAAATTGCAGGGCCCCTAGGAAAAAGGGCTGCTGGAAATGTGGAAAGGAAGGACATCAAATGAAAGATTGCACTGAGAGACAGGCTAATTTTTTAGGGAAAATTTGGCCTTCCAACAAAGGGAGGCCAGGAAATTTTCCTCAGAGCAGAACAGAGCCAACAGCCCCACCAGCAGAGAACTTGAGAATGGGGGAAGAGATAACCTCCTCCCTGAAGCAGGAACTGGAGACCAGGGAACCATACAATCCTGCAATTTCCCTCAAATCACTCTTTGGCAACGACCCCTTGTTACAGTAAAGATAGAGGGACAGCTAAAAGAAGCTCTATTAGATACAGGAGCAGATGATACAGTGTTAGAAGAAATAAATTTGCCAGGAAAATGGAAACCAAAAATGATAGGGGGAATTGGAGGTTTTATCAAAGTAAGACAATATGATCAGATAGCTATAGAAATTTGTGGAAAAAGGGCCATAGGTACAGTATTAGTAGGACCTACCCCTGTCAACATAATCGGAAGAAATATGTTGGTTCAGCTTGGTTGTACTTTAAATTTTCCAATTAGTCCTATTGAAACTGTACCAGTAAAATTAAAGCCAGGAATGGATGGTCCAAAGGTTAAACAATGGCCATTGACAGAAGAAAAAATAAAAGCATTAACAGAAATCTGTAAAGAAATGGAAAAGGAAGGAAAAATTTCAAAAATTGGGCCTGAAAATCCATACAACACTCCAGTGTTTGCTATAAAGAAAAAAGACAGCACTAAATGGAGAAAATTAGTAGATTTTAGAGAACTCAATAAGAGAACTCAAGACTTCTGGGAAGTTCAGTTAGGAATACCACATCCAGCAGGATTAAAAAAGAAAAAAGCAGTAACAGTACTTGATGTGGGGGACGCATATTTTTCCGTTCCCTTACATGAAGACTTCAGAAAATATACTGCATTCACCATACCTAGTACCAACAATGAGACACCAGGAGTTAGGTATCAGTACAATGTACTTCCACAGGGATGGAAAGGATCACCAGCAATATTCCAGAGTAGCATGACAAAGATCTTAGAGCCCTTTAGATCAAAGAATACAGAATTAATCATCTACCAATACATGGATGACTTGTATGTAGGATCTGATTTAGAAATAAGCCAGCATAGAGTAAAAATAGAGGAATTAAGGGCTCACTTATTGAAATGGGGATTTTATACACCAGACAAAAAACATCAGAAAGAACCTCCATTTCTTTGGATGGGATATGAGCTTCATCCTGACAAATGGACAGTCCAGCCTATAAAGCTGCCAGAAAAAGACAGCTGGACTGTCAATGATATACAGAAATTAGTAGGGAAATTAAATTGGGCAAGTCAGATTTATGCAGGGATTAAAGTAAAGCAACTGTGTAAACTCCTTAGAGGAGCCAAAGCACTAACAGACATAGTAACACTGACTAAAGAAGCAGAGTTAGAATTAGAAGAGAACAGGGAAATTTTAAAAACCCCTGTACATGGGGTATACTATGACCCATCAAAAGACTTAATAGCAGAAATACAGAAACAAGGGCAAGACCAATGGACATATCAAATTTATCAGGAACCCTTTAAGAATCTGAAAACAGGGAAATATGCAAAAAGGAGGTCCACCCACACTAATGATATAAAACAGTTAACAGAAGCAGTACAAAAAATAACCATGGAAAGCATAGTGATATGGGGAAAGACTCCTAAATTTAAATTACCCATACAAAAGGAAACATGGGAGACATGGTGGGCGGAGTATTGGCAGGCTACCTGGATTCCTGAGTGGGAGTTTGTCAATACCCCTCCTCTAGTAAAACTGTGGTACCAGTTAGAAAAAGAACCCATAGCAGGAGCAGAAACTTTCTATGTAGATGGGGCAGCTAATAGAGAGACTAAACTAGGAAAGGCAGGGTATGTCACTGACAGAGGAAGACAAAAAATTGTCTCCCTGACGGAGACAACAAATCAAAAGACTGAATTACATGCAATCTATTTGGCTTTACAGGATTCAGGATTAGAAGTGAACATAGTGACAGATTCACAGTATGCATTAGGAATCATTCAAGCACAACCAGAAAGGAGTGAATCAGAGATAGTCAATCAAATAATAGAAAAATTAATAGAAAAGGAAAGGGTCTACCTATCATGGGTACCAGCACACAAAGGGATTGGAGGAAATGAACAAGTAGACAAATTAGTCAGTTCTGGAATCAGGAAAGTGCTATTTTTAGATGGGATAGATAAGGCTCAAGAGGAACATGAAAGATATCACAGCAATTGGAGAGCAATGGCTCATGACTTTAATCTACCACCTGTAGTAGCAAAAGAAATAGTAGCTAGCTGTGATAAATGTCAGCTAAAAGGGGAAGCCATGCATGGACAAGTAGACTGTAGTCCAGGAATATGGCAACTAGATTGCACACATCTTGAAGGAAAAGTTATCCTGGTGGCAGTCCATGTGGCCAGTGGCTATATAGAAGCAGAAGTCATCCCAACAGAAACAGGACAGGATACAGCATACTTTATATTAAAACTAGCAGGAAGATGGCCAGTAAAAGTAATACATACAGACAATGGGCCCAATTTCATCAGTGCAACAGTTAAGGCAGCCTGTTGGTGGGCAGGTATCCAACAAGAATTTGGGATTCCCTACAATCCCCAAAGTCAAGGAGTAGTGGAATCTATGAATAAAGAATTAAAGAAAATCATAGGGCAGGTAAGAGATCAAGCTGAACACCTTAAGACAGCAGTACAAATGGCAGTATTCATTCACAATTTTAAAAGAAAAGGGGGGATTGGGGGATACAGTGCAGGGGAAAGAATAATAGACATAATAGCAACAGATATACAAACTAAAGAACTACAAAGACAAATTACAAAAATTCAAAATTTTCGGGTTTATTACAGGGACAGCAGAGATCCAATTTGGAAAGGACCAGCAAAACTCCTTTGGAAAGGTGAAGGGGCAGTAGTAATACAAGACAATAGTGACATAAAGGTAGTACCAAGAAGAAAAGCAAAGATCATTAGGGATTATGGAAAACAGATGGCAGGTGATGATTGTGTGGCAGGTAGACAGGATGAGGATTAGAACATGGAACAGTTTAGTTAAACATCATATGTATATTTCAAGGAAAGCTAAAGGTTGGGTCTATAAACATCACTATGAAAGCAGAAATCCAAGAATAAGTTCAGAAGTACACATCCCGCTAGGGGAGGCTAGAATAATAGTAAGAACATATTGGGGTCTGCACATAGGAGAAAAAGACTGGCACTTGGGTCATGGAGTCTCCATAGAATGGAGGCAAAACAGGTATCATACACAAATAGACCCTGGCTTGGCAGACCAACTAATTCATACCCATTATTTTGATTGTTTTTCAGAATCTGCCATAAGGGGAGCCATATTAGGACGAGTAGTTAGTCCTAGGTGTGAATATCAAGCAGGACATAACCAGGTAGGATCTCTACAGTATTTGGCACTGACAGCATTAGTTGCACCAAAAAAGACAAAGCCACCTTTGCCTAGTGTTAAGAAATTAGTAGAGGATAGATGGAACAAGCCCCAGAAGACCAAGGGCCACAGAGGGAGCCATACAATGAATGGATGTTAGAACTGTTAGAGGAGCTCAAGCAGGAAGCTGTTAGACATTTCCCTAGGCACTGGCTACATGGCCTAGGACAATACATCTATAATACCTATGGGGATACCTGGGAAGGAGTTGAAGTTATCATAAGATATCTGCAACAACTACTGTTTGTCCATTTCAGAATTGGGTGCCAACATAGCAGGATAGGCATTATTCGAAGAAGAAGAGTAAGGGATGGAGCCAGTAGACCCTAAACTAGAGCCCTGGAACCATCCGGGAAGTCAGCCTAAAACTGCTTGTACCAAATGTTATTGTAAACGCTGTTGCTATCATTGCCAGTTGTGCTTTATAAACAAAGGCTTAGGCATCTCCTACGGCAGGAAGAAGCGACGACCCCGACGAAAGCCTTCTCCAAGCAATAAGGACCATCAAAATCCTATACCAAAGCAGTAAGTAGTAGTAATTAATATATGTAATGTTACCTTTAGTAATATTGGCAATAGTAGGACTGATAGTAGCTTTAATCTTAGCAATAGTTGTATGGACTATAGTATTCATAGAATATAAGAAAATTAAGAAGCAAAGGAAAATAGACTGGTTAATCAAAAGAATAAGTGAGAGAGCAGAAGACAGTGGCAATGAGAGTGATGGGGACACAGAGGAACTATCAGCACTTGTGGAGAGGGGGCATCTTGATTTTGGGGATGTTAATAATGTGTAAAGCTACAGATTTGTGGGTCACAGTATACTATGGAGTACCTGTGTGGAAAGATGCAGATACCATCCTATTTTGTGCATCAGATGCTAAAGCATATGATACAGAAGTGCATAATGTATGGGCCACACATGCCTGTGTACCCACAGACCCCAACCCACAAGAAATAAACCTGGAAAATGTAACAGAAAATTTTAATATGTGGAAAAATAACATGGTAGAGCAGATGCAAGAAGATATAATCAGCTTATGGGATCAAAGCCTAAAGCCATGTGTAAAATTAACCCCGCTCTGCGTCATTTTAAATTGTAGCAATGCCAATACCAGCACCCATAGCAATAGCAGTAGCACCCAGAGCCCCATTAATGAAGAAATAAAAAACTGCTCTTACAATACTACCACAATACTAAGAGATAAGACACAAAAAGTTTATTCACTGTTTTATAGACTTGATGTAGTACAACTTGATGAAAGTGAAAATAAGAATACATCAGGTAGTAATACTCTGTATAGACTAATAAATTGTAATACCTCAACCATCACACAAGCGTGTCCAAAGGTAACCTTTGAGCCAATTCCTATACATTATTGTGCCCCAGCTGGTTTTGCGATTCTAAAGTGTAAGGATCCGAGATTCAATGGAACAGGGTCATGCAAGAATGTTAGCTCAGTACAATGTACACATGGAATTAAACCAGTAGCATCAACTCAACTGCTGTTGAATGGCAGTCTAGCAGAAGGAGGGAAAATAATGATTAGATCTGAAAATATTACAAACAATGCCAAAAACATAATAGTTCAGTTTACTAAGCCTGTACTAATTACTTGTATCAGACCCAACAACAATACAAGAAAAAGTATACGCTTTGGACCAGGACAAGCCTTCTATACAAATGAAATAATAGGGGACATAAGACAAGCACATTGTAATATCAACAAAACATTATGGAATGACACTTTACAAAAGGTAGCTGAACAATTAAGAGAGAAATTCCCTAAGAAAACCATAATCTTTACTAACTCCTCAGGAGGGGACCCAGAAATTACAACACTTAGTTTTAATTGTGCAGGAGAATTTTTCTATTGCAATACAACAGGCCTGTTTAATGGTACGTGGTGGAACAATGGTACGTGGAACGGGCCCTACACACCTAATAACACCAATGGAAGTATAATCCTCCCATGCAGAATAAAACAAATTATAAACATGTGGCAGAGAGTAGGAAGAGCAATGTATGCCCCTCCCATTGCAGGAATAATAAAGTGTACATCAAACATTACAGGAATAATATTGACAAGAGATGGTGGTAACAATGGGACTAATGAGACCTTCAGACCTGGAGGAGGAGATATGAGGGACAATTGGAGAAGTGAATTATATAAATATAAAGTAGTAAAACTTGAACCACTAGGAGTAGCACCTACCAGGGCAAAAAGAAGAGTGGTGGAGAGAGAAAAAAGAGCAGTTGGACTGGGAGCTGTCTTCCTTGGGTTCTTGGGAGCAGCAGGAAGCACTATGGGCGCGGCGTCACTAACGCTGACGGTACAGGCCAGACAATTATTGTCTGGTATAGTGCAACAGCAAAGCAATTTGCTGCAGGCTATAGAAGCTCAACAGCATCTGTTGAAACTCACAGTCTGGGGCATTAAACAGCTCCAGGCGAGGGTCCTGGCTGTGGAAAGATACCTAAAGGATCAACAGCTCCTGGGAATTTGGGGCTGCTCTGGAAAACTCATCTGCGCCACTACTGTGCCCTGGAACACTAGTTGGAGTAATAAGTCTCAGGATGAGATTTGGGACAACATGACCTGGTTGCAATGGGATAAAGAAATTAGCAATTACACAAACATAATATATAGGTTACTTGAAGAATCGCAAAACCAGCAGGAAAAGAATGAGCAAGACTTATTGGCATTAGACAAATGGGCAGATTTGTGGAGTTGGTTCAACATTTCACACTGGCTGTGGTATATAAGAATATTTATAATGATAGTAGGAGGCTTGATAGGATTAAGAATAGTTTTTGCTATAATTACTGTAGTAAATAGAGTTAGGCAGGGATACTCACCTGTGTCATTTCAGATCCCTACCCCAAGCCCAGAGGGTCCCGACAGGCCCAGAGGAACCGAAGAAGGAGGTGGAGAGCAAGGCAGAGACAGATCGATTCGATTAGTGAACGGGTTCTTCGCACTTGCCTGGGACGACCTACGGAGCCTGTGCCTCTTCAGTTACCACCGCTTGAGAGATTGCATATTGATTGCAGCGAGGACTGTGGAACTTCTGGGACACTGCAGTCTCAAGGGACTGAGACTGGGGTGGGAAGGTCTCAAGAATCTGTGGAATCTTCTGTTATACTGGGGTCGGGAACTGAAGAATAGTGCTATTAGCTTATTTGATACTATAGCAGTAGCAGTAGCTGAGTGGACAGATAGGGTTATAGAAATAGGGCAAAGAGCTTTCAGAGCTATTCTCAACATACCTAGAAGAATCAGACAGGGCTTAGAAAGGGCTTTACTATAAAATGGGGGGCAAGTGGTCAAAAAGGAGCATACCAGGATGGCCTGCTATTAGGGAGAGAATGAGAAGAACTCCTCCAACAGCACAAAGAACAGAAGCAGTGTCTCCAGCAGCACCAGGAGTAGGAGCAGTGTCTCAAGATTTAGCTACTCATGGAGCAGTCACAAGCAGTAATACAGCAGCTACTAATCCTGATTGCGCCTGGGTGGAAGCGCAAGAAGAGGAGAGTGAAGTAGGCTTCCCAGTCAGGCCACAGGTACCTTTAAGGCCAATGACCTTCAAGGGAGCGTTTGATCTCAGCTTCTTTTTAAAAGAAAAGGGGGGACTGGATGGGTTAATTTACTCCCAGAAAAGACAAGACATCCTTGATATGTGGGTCTACCACACACAAGGCTACTTCCCTGATTGGCAGAATTACACACCAGGGCCAGGGATCAGATACCCATTAACATTTGGATGGTGCTTCAAGCTAGTACCAGTAGAGCCATCTGAGGTAGAAGAAGCTACTCAGGGAGAGAACAACAGCTTATTACACCCTATATGCCAACATGGAGTAGATGACCCTGAAAGAGAAGTGTTAAGATGGGAGTTTGATAGAAGCCTGGCACGGAGACACAGAGCCCGAGAGCTGCATCCGGAGTACTACAAAGACTGCTGACACAGAAGTTGCTGACGGGGACTTTCCGCTGGGGACTTTCCAGGGAGGTGTGGTGTGGGCGGAGTTGGGGAGTGGCTAACCCTCAGATGCTGCATATAAGCAGCTGCTTCTCGCATGTACTGGGTCTCTCTTGTTGGACCAGATAGAGCCCGGGAGCTCTCTGGCTAGCAGGGGAACCCACTGCTTAAGCCTCAATAAAGCTTGCCTTGAGAGCTTC
>A2.CD.97.97CDKTB48_AF286238_J.SE.94.SE7022_AF082395
TTTTTCGAAGCGAAGTACCAGGGAAGTTCTCTCGACGCAAGACTCGGCTTGCTGAGGTGCACACGGCAAGAGGCGAGAAGCGACGGCTGGTGAGTACGCCTAAAATTTTTGACTAGCGGAGGCTAGAAGGAGAGAGATGGGTGCGAGAGCGTCAGTATTGAGCGGCGGAAAATTAGAAGCTTGGGAGAAAATTCGGTTAAGGCCAGGGGGAAAGAAAAAATATAGACTGAAACATTTAGTATGGGCAAGCAGGGAGCTGGAAAAATTCTCAATCAACCCCAGCCTTTTAGAAACAGAAACAGGATGTAGACGAATATTTGGGCAATTACAACCAGCTCTCGAGACAGGAACAGAAGAACTTAGATCATTATATAATACAATAGCAGTCCTCTACTTTGTTCATCAAAAGATAGAGGTAAAAGACACCAAGGAAGCTCTAGATAAAATAGAGGAAGAACAAAACAAATGCAAGCAGAAGACACAGCAGGCAGCAGCTGACACAGGAAGCAGCAGCAGTCAAAATTACAGAGGTAGCAGCAGTCAAAATTACCCTATAGTGCAAAATGCACAAGGGCAAATGGTACACCAGGCCGTGTCACCTAGGACTTTGAATGCATGGGTCAAAGTAGTTGAAGAGAAGGCTTTTAGCCCAGAAGTAATACCCATGTTTACAGCATTATCAGAAGGAGCCACCCCACAAGACTTAAATACTATGCTAAACACAGTGGGGGGACATCAAGCAGCTATGCAAATGTTAAAAGATACCATCAATGAGGAAGCTGCAGAATGGGACAGGTTACATCCAGTACAGGCAGGGCCTATTCCACCAGGCCAGATGAGAGAACCAAGGGGAAGTGACATAGCGGGAGCTACTAGTAACCTTCAGGAACAAATAGGATGGATGACCAGCAACCCACCTATTCCAGTGGGAGAAATCTATAAAAGATGGATAATCCTGGGATTAAATAAAATAGTAAGAATGTATAGCCCTGTCAGCATTTTGGACATAAAACAAGGGCCAAAAGAACCCTTTAGAGACTATGTAGATAGGTTCTTTAAAACTCTCAGAGCTGAGCAAGCTACACAGGAGGTAAAAAATTGGATGACAGACACCTTGCTGGTCCAAAATGCAAACCCAGATTGTAAATCCATCTTGAGGGCATTAGGACCAGGGGCTACATTAGAAGAAATGATGACAGCATGTCAGGGAGTGGGAGGACCCGGCCATAAAGCAAGGGTTTTAGCTGAAGCAATGAGCCAAGTACAAAATACAAACATAATGATACAGAGAGGCAATTTTAAGGGTCAAAAAAGAATTAAGTGTTTCAACTGTGGCAAGGAAGGACACCTAGCTAGAAATTGCAGGGCCCCTAGGAAAAAGGGCTGCTGGAAATGTGGGAAGGAAGGACATCAAATGAAAGACTGCACTGAGAGACAGGCTAATTTTTTAGGGAAAATTTGGCCTTCCAACAAAGGGAGGCCAGGGAATTTTCCTCAGAGCAGGACAGAGCCAACAGCCCCACCAATGGAGGAAGAGATAACCTCCTCGCTGAAGCAGGAGAACAGGGAGCCGTCCACCCCTGCAATTTCCCTCAAATCACTCTTTGGCAACGACCTCTTGTCACAGTGAAAATAGAAGGACAGCTAAGAGAAGCTTTATTAGATACAGGAGCAGATGATACAGTGTTAGAAGACATAAATCTGCCATGGAAATGGAAACCAAAAATGATAGGGGGAATTGGAGGTTTTATCAAAGTAAGACAATATGATCAGATAGTTATAGAAATTTGTGGAAAAAGGGCTATCGGTACAGTATTAGTAGGACCTACACCTGTCAACATAATTGGAAGAAATATGTTGGTTCAGCTTGGTTGTACTCTAAATTTTCCAATTAGTCCTATTGAAACTGTACCAGTAAAATTGAAGCCAGGAATGGATGGTCCAAAGGTCAAACAATGGCCATTGACAGAAGAAAAAATAAAAGCATTAACAGAAATTTGTAAAGAAATGGAAAAGGAAGGGAAAATTTCAAAAATTGGGCCTGAAAATCCATACAACACTCCAGTGTTTGCTATAAAGAAAAAAGACAGCGATAAATGGAGAAAATTAGTAGATTTCAGAGAACTCAATAAGAGAACTCAAGACTTCTGGGAAGTTCAGTTAGGAATACCACACCCAGCGGGATTAAAAAAGAAAAAATCAGTAACAGTATTAGATGTGGGGGACGCATATTTTTCCGTTCCCCTACATGAAGACTTCAGGAAATATACTGCATTCACCATACCTAGTATAAACAATGAGACACCAGGAATTAGGTATCAGTACAATGTACTTCCACAGGGATGGAAAGGATCACCAGCAATATTCCAGAGTAGCATGACAAAAATCCTAGATCCCTTTAGGGCAAGAAATCCAGAGATGGTCATCTACCAATACATGGATGACTTGTATGTAGGATCTGATTTAGAAATAGATCAGCATAGAGCAAAAATAGAGGAGTTAAGGGCTCATTTATTAAGATGGGGATTTACTACACCAGACAAAAAGCATCAGAAAGAACCTCCATTTCTGTGGATGGGATATGAGCTTCATCCTGACAAGTGGACAGTCCAGCCTATAAAGCTGCCAGAAAAAGACAGCTGGACTGTCAATGATATACAGAAATTAGTAGGAAAGTTAAATTGGGCAAGTCAGATTTATGCAGGGATTAAAGTAAGGCAACTGTGTAAACTCCTTAGAGGAACCAAAGCATTAACAGACATAGTACCACTGACTAGAGAAGCAGAATTAGAATTGGAAGAGAACAGGGAGATTCTAAAAGACCCTGTACATGGGGTATATTATGACCCAGCAAGAGAATTAATAGCAGAAGTGCAGAAACAAGGACTGGACCAATGGACATATCAAATTTATCAGGAGCCATTTAAAAACCTGAAAACAGGGAAATATGCAAAAAGGAGGAGTGCCCACACTAATGATGTAAAGCAATTATCACAAGTGGTGCAAAAAATAGCCTTGGAAGCCATAGTAATATGGGGAAAGATTCCTAAATTTAGACTACCCATACAAAAAGAAACATGGGAGACATGGTGGACGGAGTGGTGGCAGGCTACCTGGATTCCTGAGTGGGAGTTTGTCAATACCCCTCCTCTAGTAAAACTATGGTACCAGTTAGAAACAGAACCCATAGCAGGAGCAGAAACTTTCTATGTAGATGGGGCAGCTAATAGAGAGACTAAACTAGGAAAGGCAGGGTATGTCACTGATAGAGGAAGACAAAAAATTGTCCCCTTGACAGAGACAACAAATCAAAAGACTGAATTACATGCAATCTATTTGGCTTTACAGGATTCAGGGTCAGAAGTAAACATAGTAACAGATTCACAGTATGCATTAGGAATCATTCAAGCGCAACCAGATAGCAGTGAATCAGAGTTAGTCAATCAAATAATAGAAAAGTTAATAGAAAAGGAAAGGGTCTACCTGTCATGGGTACCAGCACACAAAGGGATTGGAGGAAATGAACAGGTGGATAAATTAGTCAGTTGTGGAATCAGAAAAGTGTTATTTTTAGATGGGATAGATAAGGCTCAAGAAGAACATGAAAAATATCACAGTAATTGGAGAGCAATGGCTCATGACTTTAATCTGCCACCTATAGTAGCCAAAGAAATAGTAGCCAGCTGTGATAAATGGTCAGGCTAAAAGGGGAAGCCATGCATGGACAAGTAGACTGCAGTCCAGGAATATGGCAACTAGATTGCACACATCTAGAAGGAAAAATTATCGTGGTAGCAGTCCATGTAGCCAGTGGCTATATAGAAGCAGAAGTCATCCCAGCAGAGACAGGACAGGAGACAGCATACTTTCTATTAAAATTAGCAGGAAGATGGCCAGTAAAAGTAATACATACAGACAATGGGCCCAATTTCACCAGTGCAGCAGTTAAGGCAGCCTGTTGGTGGGCAGATGTCAAACAGGAATTTGGGATTCCCTACAATCCCCAAAGTCAAGGAGTAGTGGAATCTATGAATAAAGAATTAAAGAAAATCATAGGGCAGGTAAGAGATCAAGCTGAACATCTTAAGACAGCAGTGCAAATGGCAGTGTTCATCCACAATTTTAAAAGAAAAGGGGGGATTGGGGGATACAGTGCAGGGGAAAGAATAATAGACATAATAGCAACAGATATACAAACTAAAGAATTACAAAAACAAATCATAAAAATTCAAAATTTTCGGGTTTATTACAGGGACAGCAGAGATCCAATTTGGAAAGGACCAGCAAAACTCCTTTGGAAAGGTGAAGGGGCAGTAGTAATACAAGACAATGGTGATATAAAAGTAGTACCAAGAAGAAAAGCAAAGATCATTAGGGATTATGGAAAACAGATGGCAGGTGATGATTGTGTGGCAGGTAGACAGGATGAGGATTAGAACATGGAACAGTCTAGTAAAACATCATATGTATGTGTCAAAGAAAGCTAGAGAGTGGTTCTATAGACATCACTATGAAAGCAGACATCCAAGAGTAAGTTCAGAAGTACACATCCCGCTAAAGGAGGCTAGATTAATAGTAAGAACATATTGGGGTCTGCACCCAGGAGAAAAAGACTGGCACTTGGGTCATGGGGTCTCCATAGAATGGAGGCAGGGAAGGTACAGTACACAAATAGACCCTGATCTGGCAGACCATCTAATCCATCTGTATTATTTTGACTGTTTTTCAGAATCTGCCATAAGGAGAGCCATATTAGGAGAAATAGTTAGGCCTAGATGTGAATATCAAGCAGGACATAATAAGGTAGGGTCTCTGCAATATTTGGCATTGAGAGCATTAGTAGCTTCAACAAGGACAAAGCCACCTTTGCCTAGTGTTAGGAAATTAGTAGAGGATAGATGGAACAAGCCCCAGAAGACCAGGGGCCACCGAGGGAGCCACACAATGAATGGGTGTTAGAACTGTTAGAGGAGCTAAAGCAAGAAGCAGTTAGACATTTCCCTAGGCCGTGGCTACATGGCCTGGGACAACATATCTATAATACCTATGGGGATACTAGGGAGGGAGTTGAAGCTATAGTAAGAATTTTGCAACAACTACTGTTTGTTCATTTCAGAATTGGGTGCCAACATAGCAGAATAGGCATTATTCCAAGAAGAAGAGTAAGGGATGGAGCCAGTAGACCCTAACTTAGAGCCCTGGAACCATCCGGGAAGCCAGCCTAAAACTGCTTGTAACAATTGCTATTGTAAAAAGTGTTGCTATCATTGCCAAAGGTGCTTTCTAAACAAAGGCTTAGGCATCTCCTATGGCAGGAAGAAGCGGAGACCCCGACGAGGACCTGATCAGGGCAATACGGATCATCAAAATCCTGTACCAAAGCAGTAAGTAGTAGTAATCAATATAGGTAATGTCACCTTTAGCAATACTGTCAATAGTAGGACTGGTAGTAGCATCAATTTTAGCAATAGTTGTGTGGACTGTAGTATTTATAGAATATAGAAAGATTAAGAAGCAAAGGAAAATAGACTGGTTACTTGAGAGAATAAGTGAAAGAGCAGAAGACAGTGGCAACGAGAGTGATGGGGACACAGAGGAATTGTCAAAAATGGTGGGAATGGGGAATCTTGGTTTTTGGGATGATAATGATGTGTAAGGCTGCAGATTTGTGGGTCACAGTATACTATGGAGTACCTGTGTGGAGAGATGCAGATACCACCCTATTTTGTGCATCAGACGCTAAAGCATATGCTACAGAAAAGCATAATGTCTGGGCCACACATGCCTGTGTACCCACAGACCCCAACCCACAAGAAGTAAACCTGGCAAATGTAACAGAAGATTTTAACATGTGGAAAAATAACATGGTAGAGCAGATGCATGCAGATATAATCAGTCTATGGGATCAAAGCCTAAAGCCATGTGTAAAATTAACCCCTCTCTGCGTCACTTTAAATTGTAGCAATGCCAACACCACTAACACCAATAGCACTGAAGAAATAAAAAACTGCTCTTACAATATGCCCACAGAACTAAAAGATAAAACACAGAAAGTCTATTCACTGTTTTATGAACTTGATGTAGTACTACTTAATAGAAGTAAGAATAGTAGTTATAGTACTTATAGACTAATAAGTTGTAATACCTCAGTCATCACACAAGCTTGTCCAAAGGTATCCTTTGAGCCAATTCCTATACATTATTGTGCCCCAGCTGGTTATGCGATTCTAAAGTGTAAGGATAAGGAATTCAATGGAAAAGGGTCATGCAGTAATGTTAGCTCAGTACAATGTGCACATGGAATTAGGCCAGTAGCATCAACTCAACTGCTGCTGAATGGCAGTCTAGCAGAAGGAAAGGTAATGATTAGATCTGAAAATATTACAGACAATGCCAAAAACATAATAGTACAGTTTAATAAACCTGTACCAATTAATTGTACCAGACCCAACAACAATACAAGAAAAAGTATACGCTTTGGACCAGGACAGGCCTTCTATACAAATAATAACATAATAGGGGATATAAGACAAGCACATTGTAATATCAGCATAACAGAATGGAATGCCACTCTAAAAAAGGTAGTTGAACAATTAAGAGAACACTTCCCTAATAAAACAATAATCTTTAATAGCTCCTCAGGAGGGGACCTAGAAATTACAACACATAGTTTTAATTGTGGAGGAGAATTTTTCTATTGCAATACAACAGGCCTGTTTAATAGCACATGGGAAAATGGCACTAACAAACAGAATTACACGGAGTCAAATGACACTATAACGCTCCAATGCAGAATAAAACAAATTATAAACATGTGGCAGAGAGTAGGCCGAGCAATGTATGCCCCTCCCATTGCAGGAGTAATAAAGTGTACATCAAACATTACAGGAATGATATTGACAAGAGACGGTGGGAAGAACAGTATTAATGAGACCTTCAGACCTGGAGGAGGAGATATGAGGGACAATTGGAGAAGTGAATTATATAAGTATAAAGTAGTAAAAATTGAACCACTAGGAATAGCACCCACAGAGGCAAGGAGAAGAGTGGTGCAGAGAGAAAAAAGAGCAGTTGGATTGGGAGCTGTTTTCCTTGGGTTCTTGGGAGCAGCAGGAAGCACTATGGGCGCGGCGTCAATAACGCTGACGGTACAGGCCAGACAATTATTGACTGGCATAGTGCAACAGCAAAGCAATTTGCTGAAGGCTATAGAGGCTCAACAACAGATGTTGAGGCTCACAGTCTGGGGCATTAAACAGCTCCAGGCAAGAGTCCTGGCTCTGGAAAGATACCTACAGGATCAACAGCTCCTAGGAATTTGGGGCTGCTCTGGAAAACTCATCTGCGCCACTGATGTGAGATGGAACTCTAGTTGGAGTAATAAGACTCAGGAGCAGATTTGGAAAAACATGACCTGGTTGCAATGGGATAAGGAAATTAGCACTTACACAGACATAATATATATGCTACTTGAGGAATCGCAGAACCAGCAGGAAAAGAATGAACAAGACTTATTGGCATTAGACAAATGGGCAAATTTGTGGAATTGGTTTGACATAACAAGATGGCTGTGGTATATAAAAATATTTATAATGATAGTAGGAGGCTTGATAGGATTAAGAATAGTTATTGCTATAATTTCTGTAGTAAAAAGAGTTAGGCAGGGATACTCACCATTGTCATTTCAGATCCCTACCCCAAACCCAGAGGGACTCGACAGGCCCGGAAGAATCGAAGAAGAAGGTGGAGAGCAAGGCAGAGACAGATCGATTCGATTAGTGAGCGGATTCTTAGCACTTGCCTGGGACGACCTACGGAGCCTGTGCCTCTTCAGCTACCACCGCTTGAGAGATTGCATCTTGATTGCAGCGAGGATTGTGGAACTTGTGGGACACAGCAGTCTCAAGGGGCTGAGACTGGGGTGGGAAGGCCTCAAACATCTGTGGAATCTTCTGGTATATTGGGGTCAGGAATTGAAGACTAGTGCTATTAGATTGCTTGATACCATAGCAGTAGCAGTAGCTGAGTGGACAGATAGGGTTATAGAAATAGGACAAAGAGCTTGCAGAGCTATCCGCAACATACCTAGAAGAATCAGACAGGGCCTCGAAAGGGCGTTACTATAAAATGGGGGGCAAGTGGTCAAAAAGAACCATAGTGGGATGGCCTGAGATTAGGGAAAGAATGAGACGAACTCCTCCAGCAGCAGAAGGAGTAAGACCAACTCCTCCAGCTGCAGAAGGAGTAGGAGCAGTGTCTCAAGATTTAGCCAGACATGGAGCAGTCACAAGCAGTAATACAGCAGCTAACAATCCTGATTGCGCCTGGCTGGAAGCGCAAGAAGAGGAGGAAGTAGGCTTTCCAGTCAGGCCACAGGTACCTTTAAGGGCGATGACCTACAAGGGAGCTGTAGATCTCAGCCACTTTTTAAAAGAAAAGGGGGGACTGGATGGGCTAATTTACTCCCAGAGAAGACAAGACATCCTTGATCTGTGGGTCTACAACACACAGGGCTACTTCCCTGATTGGCAGAATTACACACCAGGGCCAGGGGCCAGGTTCCCACTAACATTTGGATGGTGCTTCAAGCTAGTACCAGTTGATCCATCTGAGGTAGAAGAGGCTACGGAGGGGGAGAACAACAGTTTATTACACCCCATATGCCAACATGGAGCAGAGGACCCTGAAAGAGAAGTGTTAAAGTGGAAGTTTGATAGTCGCCTGGCGCTGAGACACCTAGCCAGAGAGCAGCATCCGGAGTTCTACAAAGACTGCTGACACAGAAGATGCTGACACAGAAGTTGCTGACAGGGACTTTCCACGGGGACTTTCCGGGGAGGTGTGGTGAGGGCGGAGTTGGGAGTGGCTAACCCTCAGATGCTGCATATAAGCAGCTGCTTTGCGCCTGTACTGGGTCTCTCCTTGTTGGACCAGATAGAGCCTGGGAGCTCTCAGGCTAGCAGGGGAACCCA
>A2.CD.97.97CDKTB48_AF286238_K.CD.97.EQTB11C_AJ249235
TTTTTCGAAGCGAAGTACCAGGGAAGTTCTCTCGACGCAAGACTCGGCTTGCTGAGGTGCACACGGCAAGAGGCGAGAAGCGACGGCTGGTGAGTACGCCTAAAATTTTTGACTAGCGGAGGCTAGAAGGAGAGAGATGGGTGCGAGAGCGTCAGTATTGAGCGGCGGAAAATTAGAAGCTTGGGAGAAAATTCGGTTAAGGCCAGGGGGAAAGAAAAAATATAGACTGAAACATTTAGTATGGGCAAGCAGGGAGCTGGAAAAATTCTCAATCAACCCCAGCCTTTTAGAAACAGAAACAGGATGTAGACGAATATTTGGGCAATTACAACCAGCTCTCGAGACAGGAACAGAAGAACTTAGATCATTATATAATACAATAGCAGTCCTCTACTTTGTTCATCAAAAGATAGAGGTAAAAGACACCAAGGAAGCTCTAGATAAAATAGAGGAAGAACAAAACAAATGCAAGCAGAAGACACAGCAGGCAGCAGCTGACACAGGAAGCAGCAGCAGTCAAAATTACAGAGGTAGCAGCAGTCAAAATTACCCTATAGTGCAAAATGCACAAGGGCAAATGGTACACCAGGCCGTGTCACCTAGGACTTTGAATGCATGGGTCAAAGTAGTTGAAGAGAAGGCTTTTAGCCCAGAAGTAATACCCATGTTTACAGCATTATCAGAAGGAGCCACCCCACAAGACTTAAATACTATGCTAAACACAGTGGGGGGACATCAAGCAGCTATGCAAATGTTAAAAGATACCATCAATGAGGAAGCTGCAGAATGGGACAGGTTACATCCAGTACAGGCAGGGCCTATTCCACCAGGCCAGATGAGAGAACCAAGGGGAAGTGACATAGCGGGAGCTACTAGTAACCTTCAGGAACAAATAGGATGGATGACCAGCAACCCACCTATTCCAGTGGGAGAAATCTATAAAAGATGGATAATCCTGGGATTAAATAAAATAGTAAGAATGTATAGCCCTGTCAGCATTTTGGACATAAAACAAGGGCCAAAAGAACCCTTTAGAGACTATGTAGATAGGTTCTTTAAAACTCTCAGAGCTGAGCAAGCTACACAGGAGGTAAAAAATTGGATGACAGACACCTTGCTGGTCCAAAATGCAAACCCAGATTGTAAATCCATCTTGAGGGCATTAGGACCAGGGGCTACATTAGAAGAAATGATGACAGCATGTCAGGGAGTGGGAGGACCCGGCCATAAAGCAAGGGTTTTAGCTGAAGCAATGAGCCAAGTACAAAATACAAACATAATGATACAGAGAGGCAATTTTAAGGGTCAAAAAAGAATTAAGTGTTTCAACTGTGGCAAGGAAGGACACCTAGCTAGAAATTGCAGGGCCCCTAGGAAAAAGGGCTGCTGGAAATGTGGGAAGGAAGGACATCAAATGAAAGACTGCACTGAGAGACAGGCTAATTTTTTAGGGAAAATTTGGCCTTCCAACAAAGGGAGGCCAGGGAATTTTCCTCAGAGCAGGACAGAGCCAACAGCCCCACCAATGGAGGAGAAGATAACCCCCTCTCTGAGACAGGAAATGAAAGATCAGGAACAGGGTCCTCCTTTAACTTCCCTCAAATCACTCTTTGGCAGCGACCCGTTGTCACAGTAAAAGTAGGGGGACAGTTAAGAGAAGCTCTATTAGATACAGGAGCAGATGATACAGTATTAGAAGAAATAAATTTACCGGGAAAATGGAAACCAAAAATGATAGGGGGAATTGGAGGTTTTATCAAAGTAAGACAATATGATCAGATAGTTATAGAAATTTGTGGAAAAAGGGCTATCGGTACAGTATTAGTAGGACCTACACCTGTCAACATAATTGGAAGAAATATGTTGGTTCAGCTTGGTTGTACTCTAAATTTTCCAATTAGTCCTATTGAAACTGTACCAGTAAAATTGAAGCCAGGAATGGATGGTCCAAAGGTCAAACAATGGCCATTGACAGAAGAAAAAATAAAAGCATTAACAGAAATTTGTAAAGAAATGGAAAAGGAAGGGAAAATTTCAAAAATTGGGCCTGAAAATCCATACAACACTCCAGTGTTTGCTATAAAGAAAAAAGACAGCGATAAATGGAGAAAATTAGTAGATTTCAGAGAACTCAATAAGAGAACTCAAGACTTCTGGGAAGTTCAGTTAGGAATACCACACCCAGCGGGATTAAAAAAGAAAAAATCAGTAACAGTATTAGATGTGGGGGACGCATATTTTTCCGTTCCCCTACATGAAGACTTCAGGAAATATACTGCATTCACCATACCTAGTATAAACAATGAGACACCAGGAATTAGGTATCAGTACAATGTACTTCCACAGGGATGGAAAGGATCACCAGCAATATTCCAGAGTAGCATGACAAAAATCCTAGATCCCTTTAGGGCAAGAAATCCAGAGATGGTCATCTACCAATACATGGATGACTTGTATGTAGGATCTGATTTAGAAATAGATCAGCATAGAGCAAAAATAGAGGAGTTAAGGGCTCATTTATTAAGATGGGGATTTACTACACCAGACAAAAAGCATCAGAAAGAACCTCCATTTCTGTGGATGGGATATGAGCTTCATCCTGACAAGTGGACAGTCCAGCCTATAAAGCTGCCAGAAAAAGACAGCTGGACTGTCAATGATATACAGAAATTAGTAGGAAAGTTAAATTGGGCAAGTCAGATTTATGCAGGGATTAAAGTAAGGCAACTGTGTAAACTCCTTAGAGGAACCAAAGCATTAACAGACATAGTACCACTGACTAGAGAAGCAGAATTAGAATTGGAAGAGAACAGGGAGATTCTAAAAGACCCTGTACATGGGGTATATTATGACCCATCAAAAGACTTAATAGCAGAAATACAGAAACAAGGGCAAGGCCAATGGTCATATCAAATTTATCAAGAACCATTTAAAAATCTAAAAACAGGGAAATATGCAAAAAGGAAGTCCACCCACACCAATGATGTAAAACAATTAACAGAAGCAGTACAAAAAATAGCCACAGAAAGCATAGTAATATGGGGAAAGATTCCTAAATTTAGACTACCCATACAAAAAGAAACATGGGAGACATGGTGGACGGAGTGGTGGCAGGCTACCTGGATTCCTGAGTGGGAGTTTGTCAATACCCCTCCTCTAGTAAAACTATGGTACCAGTTAGAAACAGAACCCATAGCAGGAGCAGAAACTTTCTATGTAGATGGGGCAGCTAATAGAGAGACTAAACTAGGAAAGGCAGGGTATGTCACTGATAGAGGAAGACAAAAAATTGTCCCCTTGACAGAGACAACAAATCAAAAGACTGAATTACATGCAATCTATTTGGCTTTACAGGATTCAGGGTCAGAAGTAAACATAGTAACAGATTCACAGTATGCATTAGGAATCATTCAAGCGCAACCAGATAGCAGTGAATCAGAGTTAGTCAATCAAATAATAGAAAAGTTAATAGAAAAGGAAAGGGTCTACCTGTCATGGGTACCAGCACACAAAGGGATTGGAGGAAATGAACAGGTGGATAAATTAGTCAGTTGTGGAATCAGAAAAGTGTTATTTTTAGATGGGATAGATAAGGCTCAAGAAGAACATGAAAAATATCACAGTAATTGGAGAGCAATGGCTCATGACTTTAATCTGCCACCTATAGTAGCCAAAGAAATAGTAGCCAGCTGTGATAAATGGTCAGGCTAAAAGGGGAAGCCATGCATGGACAAGTAGACTGCAGTCCAGGAATATGGCAACTAGATTGCACACATCTAGAAGGAAAAATTATCGTGGTAGCAGTCCATGTAGCCAGTGGCTATATAGAAGCAGAAGTCATCCCAGCAGAGACAGGACAGGAGACAGCATACTTTCTATTAAAATTAGCAGGAAGATGGCCAGTAAAAGTAATACATACAGACAATGGGCCCAATTTCACCAGTGCAGCAGTTAAGGCAGCCTGTTGGTGGGCAGATGTCAAACAGGAATTTGGGATTCCCTACAATCCCCAAAGTCAAGGAGTAGTGGAATCTATGAATAAAGAATTAAAGAAAATCATAGGGCAGGTAAGAGATCAAGCTGAACATCTTAAGACAGCAGTGCAAATGGCAGTGTTCATCCACAATTTTAAAAGAAAAGGGGGGATTGGGGGATACAGTGCAGGGGAAAGAATAATAGACATAATAGCAACAGATATACAAACTAAAGAATTACAAAAACAAATCATAAAAATTCAAAATTTTCGGGTTTATTACAGGGACAGCAGAGATCCAATTTGGAAAGGACCAGCAAAACTCCTTTGGAAAGGTGAAGGGGCAGTAGTAATACAAGACAATGGTGATATAAAAGTAGTACCAAGAAGAAAAGCAAAGATCATTAGGGATTATGGAAAACAGATGGCAGGTGATGATTGTGTGGCAGGTAGACAGGATGAGGATTAGAACATGGAACAGTCTAGTAAAACATCATATGTATGTGTCAAAGAAAGCTAGAGAGTGGTTCTATAGACATCACTATGAAAGCAGACATCCAAGAGTAAGTTCAGAAGTACACATCCCGCTAAAGGAGGCTAGATTAATAGTAAGAACATATTGGGGTCTGCACCCAGGAGAAAAAGACTGGCACTTGGGTCATGGGGTCTCCATAGAATGGAGGCAGGGAAGGTACAGTACACAAATAGACCCTGATCTGGCAGACCATCTAATCCATCTGTATTATTTTGACTGTTTTTCAGAATCTGCCATAAGGAGAGCCATATTAGGAGAAATAGTTAGGCCTAGATGTGAATATCAAGCAGGACATAATAAGGTAGGGTCTCTGCAATATTTGGCATTGAGAGCATTAGTAGCTTCAACAAGGACAAAGCCACCTTTGCCTAGTGTTAGGAAATTAGTAGAGGATAGATGGAACAAGCCCCAGAAGACCAGGGGCCACCGAGGGAGCCACACAATGAATGGGTGTTAGAACTGTTAGAGGAGCTAAAGCAAGAAGCAGTTAGACATTTCCCTAGGCCGTGGCTACATGGCCTGGGACAACATATCTATAATACCTATGGGGATACTAGGGAGGGAGTTGAAGCTATAGTAAGAATTTTGCAACAACTACTGTTTGTTCATTTCAGAATTGGGTGCCAACATAGCAGAATAGGCATTATTCCAAGAAGAAGAGTAAGGGATGGAGCCAGTAGACCCTAACTTAGAGCCCTGGAACCATCCGGGAAGCCAGCCTAAAACTGCTTGTAACAATTGCTATTGTAAAAAGTGTTGCTATCATTGCCAAAGGTGCTTTCTAAACAAAGGCTTAGGCATCTCCTATGGCAGGAAGAAGCGGAGACCCCGACGAGGACCTGATCAGGGCAATACGGATCATCAAAATCCTGTACCAAAGCAGTAAGTAGTAGTAATCAATATAGGTAATGTCACCTTTAGCAATACTGTCAATAGTAGGACTGGTAGTAGCATCAATTTTAGCAATAGTTGTGTGGACTGTAGTATTTATAGAATATAGAAAGATTAAGAAGCAAAGGAAAATAGACTGGTTACTTGAGAGAATAAGTGAAAGAGCAGAAGACAGTGGCAACGAGAGTGATGGGGACACAGAGGAATTGTCAAAAATGGTGGGAATGGGGAATCTTGGTTTTTGGGATGATAATGATGTGTAAGGCTGCAGATTTGTGGGTCACAGTATACTATGGAGTACCTGTGTGGAGAGATGCAGATACCACCCTATTTTGTGCATCAGACGCTAAAGCATATGCTACAGAAAAGCATAATGTCTGGGCCACACATGCCTGTGTACCCACAGACCCCAACCCACAAGAAGTAAACCTGGCAAATGTAACAGAAGATTTTAACATGTGGAAAAATAACATGGTAGAGCAGATGCATGCAGATATAATCAGTCTATGGGATCAAAGCCTAAAGCCATGTGTAAAATTAACCCCTCTCTGCGTCACTTTAAATTGTAGCAATGCCAACACCACTAACACCAATAGCACTGAAGAAATAAAAAACTGCTCTTACAATATGCCCACAGAACTAAAAGATAAAACACAGAAAGTCTATTCACTGTTTTATGAACTTGATGTAGTACTACTTAATAGAAGTAAGAATAGTAGTTATAGTACTTATAGACTAATAAGTTGTAATACCTCAGTCATCACACAAGCTTGTCCAAAGGTATCCTTTGAGCCAATTCCTATACATTATTGTGCCCCAGCTGGTTATGCGATTCTAAAGTGTAAGGATAAGGAATTCAATGGAAAAGGGTCATGCAGTAATGTTAGCTCAGTACAATGTGCACATGGAATTAGGCCAGTAGCATCAACTCAACTGCTGCTGAATGGCAGTCTAGCAGAAGGAAAGGTAATGATTAGATCTGAAAATATTACAGACAATGCCAAAAACATAATAGTACAGTTTAATAAACCTGTACCAATTAATTGTACCAGACCCAACAACAATACAAGAAAAAGTATACGCTTTGGACCAGGACAGGCCTTCTATACAAATAATAACATAATAGGGGATATAAGACAAGCACATTGTAATATCAGCATAACAGAATGGAATGCCACTCTAAAAAAGGTAGTTGAACAATTAAGAGAACACTTCCCTAATAAAACAATAATCTTTAATAGCTCCTCAGGAGGGGACCTAGAAATTACAACACATAGTTTTAATTGTGGAGGAGAATTTTTCTATTGCAATACAACAGGCCTGTTTAATAGCACATGGGAAAATGGCACTAACAAACAGAATTACACGGAGTCAAATGACACTATAACGCTCCAATGCAGAATAAAACAAATTATAAACATGTGGCAGAGAGTAGGCCGAGCAATGTATGCCCCTCCCATTGCAGGAGTAATAAAGTGTACATCAAACATTACAGGAATGATATTGACAAGAGACGGTGGGAAGAACAGTATTAATGAGACCTTCAGACCTGGAGGAGGAGATATGAGGGACAATTGGAGAAGTGAATTATATAAGTATAAAGTAGTAAAAATTGAACCACTAGGAATAGCACCCACAGAGGCAAGGAGAAGAGTGGTGCAGAGAGAAAAAAGAGCAGTTGGATTGGGAGCTGTTTTCCTTGGGTTCTTGGGAGCAGCAGGAAGCACTATGGGCGCGGCGTCAATAACGCTGACGGTACAGGCCAGACAATTATTGACTGGCATAGTGCAACAGCAAAGCAATTTGCTGAAGGCTATAGAGGCTCAACAACAGATGTTGAGGCTCACAGTCTGGGGCATTAAACAGCTCCAGGCAAGAGTCCTGGCTCTGGAAAGATACCTACAGGATCAACAGCTCCTAGGAATTTGGGGCTGCTCTGGAAAACTCATCTGCGCCACTGATGTGAGATGGAACTCTAGTTGGAGTAATAAGACTCAGGAGCAGATTTGGAAAAACATGACCTGGTTGCAATGGGATAAGGAAATTAGCACTTACACAGACATAATATATATGCTACTTGAGGAATCGCAGAACCAGCAGGAAAAGAATGAACAAGACTTATTGGCATTAGACAAATGGGCAAATTTGTGGAATTGGTTTGACATAACAAGATGGCTGTGGTATATAAAAATATTTATAATGATAGTAGGAGGCTTGATAGGATTAAGAATAGTTATTGCTATAATTTCTGTAGTAAAAAGAGTTAGGCAGGGATACTCACCATTGTCATTTCAGATCCCTACCCCAAACCCAGAGGGACTCGACAGGCCCGGAAGAATCGAAGAAGAAGGTGGAGAGCAAGGCAGAGACAGATCGATTCGATTAGTGAGCGGATTCTTAGCACTTGCCTGGGACGACCTACGGAGCCTGTGCCTCTTCAGCTACCACCGCTTGAGAGATTGCATCTTGATTGCAGCGAGGATTGTGGAACTTGTGGGACACAGCAGTCTCAAGGGGCTGAGACTGGGGTGGGAAGGCCTCAAACATCTGTGGAATCTTCTGGTATATTGGGGTCAGGAATTGAAGACTAGTGCTATTAGATTGCTTGATACCATAGCAGTAGCAGTAGCTGAGTGGACAGATAGGGTTATAGAAATAGGACAAAGAGCTTGCAGAGCTATCCGCAACATACCTAGAAGAATCAGACAGGGCCTCGAAAGGGCGTTACTATAAAATGGGGGGCAAGTGGTCAAAAAGAACCATAGTGGGATGGCCTGAGATTAGGGAAAGAATGAGACGAACTCCTCCAGCAGCAGAAGGAGTAAGACCAACTCCTCCAGCTGCAGAAGGAGTAGGAGCAGTGTCTCAAGATTTAGCCAGACATGGAGCAGTCACAAGCAGTAATACAGCAGCTAACAATCCTGATTGCGCCTGGCTGGAAGCGCAAGAAGAGGAGGAAGTAGGCTTTCCAGTCAGGCCACAGGTACCTTTAAGGGCGATGACCTACAAGGGAGCTGTAGATCTCAGCCACTTTTTAAAAGAAAAGGGGGGACTGGATGGGCTAATTTACTCCCAGAGAAGACAAGACATCCTTGATCTGTGGGTCTACAACACACAGGGCTACTTCCCTGATTGGCAGAATTACACACCAGGGCCAGGGGCCAGGTTCCCACTAACATTTGGATGGTGCTTCAAGCTAGTACCAGTTGATCCATCTGAGGTAGAAGAGGCTACGGAGGGGGAGAACAACAGTTTATTACACCCCATATGCCAACATGGAGCAGAGGACCCTGAAAGAGAAGTGTTAAAGTGGAAGTTTGATAGTCGCCTGGCGCTGAGACACCTAGCCAGAGAGCAGCATCCGGAGTTCTACAAAGACTGCTGACACAGAAGATGCTGACACAGAAGTTGCTGACAGGGACTTTCCACGGGGACTTTCCGGGGAGGTGTGGTGAGGGCGGAGTTGGGAGTGGCTAACCCTCAGATGCTGCATATAAGCAGCTGCTTTGCGCCTGTACTGGGTCTCTCCTTGTTGGACCAGATAGAGCCTGGGAGCTCTCAGGCTAGCAGGGGAACCCA
>B.NL.96.H434_42_A1_AY970948_C.TZ.97.97TZ04_AF361874
TAGCAGAACTACACATCAGGGCCAGGGATCAGATATCCACTGACCTTTGGATGGTGCTTCAAGCTAGTACCAGTTGATCCAGATGAGGTAGAAAAGGCCAATGAGGGAGAGAACAACAGCCTGTTACACCCTATGAGCCTGCATGGGATGGAGGACAAGGAGAAAGAAGTACTAGTGTGGAAGTTTGACAGCCACCTAGCATTTCGTCACATGGCCCGAGAGCTGCATCCGGAGTACTACAAGAACTGCTGACATCGAGCTTTCTACAAGGGACTTTCCGCTGGGGACTTTCCAGGGAGGTGTGGCCTGGGCGGGACAGGGGAGTGGCGAGCCCTCAGATGCTGCATATAAGCAGCTGCTTTTTGCCTGTACTGGGTCTCTCTGGTTAGACCAGATCAGAGCCTGGGAGCTCTCTGGCTAGCTAGGGAACCCACTGCTTAAGCCTCAATAAAGCTTGCCTTGAGTGCTTCAAGTAGTGTGTGCCCGTCTGTTGTGTGACTCTGGTAACTAGAGATCCCTCAGACCCTTTTAGTCAGTATGGAAAATCTCTAGCAATGGCGCCCGAACAGGGACGCGAAAGCGAAAGTAGAACCAGAGGAGCTCTCTTGACGCAGGACTCGGCTTGCTGAAGCGCGCGCGGCAAGAGGCGAGGGGCGGCGGCTGGTGAGTACGCCNAAAAATTTTGACTAGCGGAGGCTAGAAGGAGAGAGATGGGTGCGAGAGCGTCAGTATTAAGCGGGGGAGAATTAGATAGATGGGAAAAAATTCGGTTAAGGCCAGGGGGAAAGAAAAAATATCGCTTAAAACATATAGTATGGGCAAGCAGGGAGCTAGAACGATTCGCAGTCAATCCTGGCCTGTTAGAAACAGCAGAAGGCTGCAGACAAATACTGGGACAGCTACAACCGTCCCTTCAGACAGGATCAGAAGAACTTAGATCATTATTTAATACAATAGCAACCCTCTATTGTGTACATCAAAGAATAGAGGTAAAAGACACCAAGGAAGCTTTAGACAAGATAGAGGAAGAGCAAAACAAAAGTAAGAAAAAGGCACAGCAAGCAGCAGCTGGCGCTGGCACAGGAAACAACAGCCAGGTCAGCCAAAATTACCCTATAGTGCAGAACCTACAGGGGCAAATGGTACATCAGGCCATATCACCTAGAACTTTAAATGCATGGGTAAAAGTAATAGAAGAAAAGGCTTTTAACCCAGAAGTAATACCCATGTTTACAGCATTATCAGAAGGAGCCACCCCACAAGATTTAAACACCATGCTAAACACAGTGGGGGGACATCAAGCAGCCATGCAAATGTTAAAAGAGACCATCAATGAGGAAGCTGCAGAATGGGATAGATTGCATCCAGTGCATGCAGGGCCTCCCGTACCAGGCCAGATGAGAGAACCAAGGGGAAGTGATATAGCAGGAACTACTAGTACCCTTCAGGAACAAATAGGATGGATGACAAGTAATCCACCTATCCCAGTAGGAGAGATCTATAAAAAATGGATAGTCATGGGATTAAATAAAATAGTAAGAATGTATAGCCCTGTCAGCATTCTGGACATAAGACAAGGACCAAAAGAACCCTTTAGAGACTATGTAGACCGGTTCTACAAAACTCTAAGAGCCGAGCAAGCTACACAGGAAGTAAAAAATTGGATGACAGAAACCTTGTTGGTCCAAAATGCGAACCCAGATTGTAAAACTATTTTAAAAGCATTGGGACCAGCAGCTACACTAGAAGAAATGATGACAGCATGCCAGGGAGTAGGGGGACCTGGCCATAAGGCAAGAATTTTGGCTGAAGCAATGAGCCAAGCAACAAATTCAGCTGCTATAATGATGCAGAAAGGCTATGTTAGGAACCAAAGAAAGACTGTTAAGTGTTTTAATTGTGGCAAAGAAGGGCACATAGCCAAAAACTGCAGGGCCCCTAGGAAAAAGGGCTGTTGGAAATGTGGAAGGGAAGGACACCAAATGAAAGATTGTACTGAGAGACAGGCTAATTTTTTAGGGAAAATCTGGCCTTCCCACAAGGGGAGGCCAGGGAATTTTCTTCAGAGCAGACCAGAGCCAACAGCCCCACCAGAAGAGAGCTTCAGGTTTGGGGAAGAGACAACAACTCCCTCTCAGAAGCAGGAGCCGATAGACAAGGAACTGTATCCTTTAGCTTCCCTCAAATCACTCTTTGGCAACGACCCCTCGTCACAATAAAGATAGGGGGGCAGCTAAAGGAAGCTCTATTAGATACAGGAGCAGATGATACAGTATTAGAAGACATGAATTTGCCAGGAAAATGGAAACCAAAAATGATAGGGGGAATTGGAGGTTTTATCAAAGTAAGACAGTATGATCAGATACCCTTAGAAATCTGCGGACACAAAGCTATAGGTACAGTATTAGTAGGACCTACACCTGTCAACATAATTGGAAGAAATCTGTTGACTCAGATTGGTTGTACTTTAAATTTTCCCATTAGTCCTATTGAAACTGTACCAGTAAAATTAAAGCCAGGAATGGATGGCCCAAAAGTTAAACAGTGGCCATTGACAGAAGAAAAAATAAAAGCATTAGTAGAAATTTGTACAGAAATGGAAAAGGAAGGAAAAATTTCAAAAATTGGGCCTGAAAACCCATACAATACTCCAATATTTGCCATAAAGAAAAAAGACAGTACTAAGTGGAGAAAATTAGTAGATTTCAGAGAACTTAATAAGAGAACTCAAGACTTTTGGGAAGTTCAATTGGGAATACCACATCCCGCAGGGTTAAAAAAGAAAAAATCAGTAACAGTACTGGATGTGGGTGATGCATACTTTTCAGTTCCCTTAGATAAAGACTTCAGAAAGTATACTGCATTTACCATACCTAGTGTAAACAATGAAACACCAGGGATTAGATATCAGTACAATGTGCTGCCACAGGGATGGAAAGGATCACCAGCAATATTCCAATGTAGCATGACAAAAATCTTAGAGCCTTTTAGAAAACAAAATCCAGACATAGTTATCTACCAATACATGGATGATTTGTATGTAGGATCTGACTTAGAAATAGGGCAGCATAGAACAAAAATAGAGGAATTGAGACAACATCTGTTGAAGTGGGGATTTACCACACCAGACAAAAAGCATCAGAAAGAACCCCCATTCCTTTGGATGGGTTATGAACTCCATCCTGATAAATGGACAGTACAGCCTATAGTGCTGCCAGAAAAAGACAGCTGGACTGTCAATGACATACAGAAGTTAGTGGGAAAGTTGAATTGGGCAAGTCAGATTTATGCAGGGATTAAAGTAAAGCAATTATGTAAACTCCTTAGGGGAGCCAAAGCACTAACAGAAGTAATACCACTAACAAAAGAAGCAGAGCTAGAGCTGGCAGAAAACAGGGAGATTCTAAAGGTACCAGTACATGGAGTATATTATGACCCATCAAAAGATTTAGTAGCAGAAATACAGAAGCAGGGGCTAGGCCAATGGACATATCAAATTTACCAAGAGCCATTTAAAAATCTGAAAACAGGAAAATATGCAAAAATGAGGACTGCCCACACTAATGATGTAAAACAGTTAACAGAGGCAGTGCAAAAAATAGCCATGGAAAGCATAGTAATATGGGGAAAGACCTCTAAATTTAGACTACCCATCCAAAAGGAAACATGGGAGACATGGTGGACAGACTATTGGCAAGCCACCTGGATTCCTGAATGGGAGTTTGTCAATACCCCTCCCTTAGTGAAATTATGGTACCAGTTAGAGAAAGAACCCATAGTAGGGGCAGAAACTTTCTATGTAGATGGGGCAGCTAATAGGGAAACTAAATTAGGAAAAGCAGGATATGTTACTGACAGAGGAAGACAAAAAGTTGTCTCCCTAACTGACACAACAAATCAAAAGACTGAGTTACAAGCAATACATCTAGCTTTGCAGGATTCAGGATTAGAAGTAAACATAGTAACAGACTCACAATATGCATTAGGAATCATTCAAGCACAACCAGATAAGAGTGAATCAGAGATAGTCAGTCAAATAATAGAGCAGTTAATAAAAAAGGAAAAGGTCTACCTGGCATGGGTACCAGCACACAAAGGAATTGGAGGAAATGAGCAAGTAGATAAATTAGTCAGTGCTGGAATCAGGAAAGTACTATTTTTGGATGGAATAGATAAGGCCCAAGAAGACCATGAGAAATATCATAGTAATTGGAGAGCAATGGCTAGTGATTTTAACCTGCCACCTATAGTAGCAAAAGAAATAGTAGCCAGCTGTGATAAATGTCAGCTAAAAGGGGAAGCCATACATGGACAAGTAGACTGTAGTCCAGGAATATGGCAACTAGATTGTACACATTTAGAAGGAAAAATTATCCTGGTAGCAGTTCATGTCGCCAGTGGATATATAGAAGCAGAAGTTATCCCAGCAGAGACAGGGCAGGAAACAGCATACTTTCTTTTAAAATTAGCAGGAAGATGGCCAGTAAAAACAATACATACAGACAATGGCAGCAATTTCACCAGTACTACAGTTAAGGCTGCCTGTTGGTGGGCAGGGATCAAGCAGGAATTTGGCATTCCCTACAATCCCCAAAGTCAAGGAGTAGTAGAATCTATGAATAAAGAATTAAAGAAAATTATAGGACAGGTAAGAGATCAGGCTGAACATCTTAAGACAGCAGTACAAATGGCAGTATTCATCCACAATTTTAAAAGAAAAGGGGGGATTGGGGAGTACAGTGCAGGGGAAAGAATAATAGACATAATAGCAACAGACATACAAACTAAAGAATTACAAAAGCAAATTACAAAAATTCAAAATTTTCGGGTTTATTACAGGGACAACAGAGATCCACTTTGGAAGGGACCAGCAAAGCTGCTCTGGAAAGGTGAAGGGGCAGTAGTAATACAAGATAATAGTGACATAAAAGTAGTGCCAAGAAGAAAAGCAAAGATCATTAGAGATTATGGAAAACAGATGGCAGGTGATGATTGTGTGGCAAGTAGACAGGATGAGGATTAGAACATGGAAAAGTTTAGTAAAACACCATATATATATTTCAAAGAAAGCTAAGGGATGGCTTTATAAACATCACTATGAAAGCACTAATCCAAGAATAAGTTCAGAAGTACACATCCCACTAGGGGATGCTAGATTAGTAATAACAACATATTGGGGTCTGCATACAGGAGAAAGAGATTGGCATTTGGGTCAGGGAGTCTCCATAGAATGGAGGAAAGAGAGATATAGCACACAAGTAGACCCTGACATAGCAGACCAACTAATTCATCTATATTATTTTGATTGTTTTTCAGAATCTGCTATAAGAAATGCCATATTAGGACATTTAGTTAGTCCCAGGTGTGAATATCAAGCAGGACATAACAAGGTAGGGTCTCTACAGTATTTGGCACTAGTAGCATTGATANCACCAAAAAAGATAAAGCCACCTTTGCCTAGTGTTAAGAAATTGACAGAGGATAGATGGAACAAGCCCCAGAAAACCAAGGGCCACAGAGGGAGCCATACAATGAATGGACACTAGAGCTTTTGGAGGAACTTAAGAGTGAAGCTGTTAAACATTTTCCTAGAACATGGCTCCATAACTTTGGACAATATATCTATGACACTTATGGGGATACTTGGGCAGGAGTGGAAGCCTTAATAAGAAGTCTGCAACAACTGCTGTTTATCCATTTCAGAATTGGGTGCCGACATAGCAGAATAGGCATTCAACAGAGGAGAGGAAGAAGAAATGGAGCCAGTAGATCCTAGACTAGAGCCCTGGAAGCATCCAGGAAGTCAGCCTAGGACTGCTTGTACCAATTGCTATTGTAAAAAATGCTGCTTTCATTGCCAAGTTTGTTTCATAAAAAAAGGCTTAGGCATCTCCTATGGCAGGAAGAAGCGGAGACAGCGACGAAGACCTCCTCAGGACAGTCAGACTCATCAAACAGCTCTATCAAAGCAGTAAGTAGTACATGTAATGCAGCCTTTATACATATGGACAATAGTAGCATTAGTAGTAGCAGCAATAATAGCAATAGTTGTGTGGGCCATAGTAATCATAGAATATAGGAAAATATTAAGACAAAGAAAAATAGACAGGTTACTTGATAGAATAATAGAAAGAGCAGAAGACAGTGGCAATGAAAGCGAGGGGGACCAGGAAGAATTATCAGCACTTATGGAAATGGGGCACCATGCTCCAGCACTTAGGGAAATGGGGCATCATGCTCCTTGGGATGTTAATGATCTGTAGTGCTACAGAGAAATTGTGGGTCACAGTTTATTATGGGGTACCTGTGTGGAAAGAAGCAACCACCACTCTATTTTGTGCATCAGATGCTAAAGCATATGAAACAGAGGTGCATAATGTTTGGGCCACACATGCCTGTGTACCCACAGACCCCAACCCACAAGAAGTATTCTTGGGAAATGTGACAGAAAATTTTAACATGTGGAAAAATAACATGGTAGAACAAATGCATGAGGACATGATCAGTTTATGGGATCAAAGTCTAAAGCCATGTGTAAAATTAACCCCACTCTGTGTTACTTTAAATTGCATTGATGTAAATACTACTAATACCAATGTCAATGGTACTAATACCACTGTTAGTGAAGGGGGAAAAGATATGACAAACTGCTCTTTCAATATCACCACAAGCATAAGAGATAGGGTTCAGCGAGAATATGCACTTTTTTATAAACTTGATGTAGTACAAGTAGATGGTGATAATACCACATATAGGTTGATAAATTGTAACACCTCAGTCATTACACAAGCTTGTCCAAAGGTATCATTCGAGCCAATTCCCATACATTATTGTGCCCCGGCTGGTTTTGCGATTCTAAAATGTAATAATAATACGTGCAATGGATCAGGACCATGTACAAATGTCAGCACAGTACAATGTACACATGGAATTAGGCCAGTAGTGTCAACTCAATTACTGTTAAATGGCAGTTTGGCAAAAGAAGGGGTAGTACTTAGATCTGAAAATTTCACGGACAATGCTAAAAACATAATAGTACAGCTGAAGAATCCTGTAAACATTACTTGTACAAGACCTAACAACAATACCAGAAAAAGTATACATATAGGACCAGGGAGAGCATTCTATGCAACAGGAGATATAATAGGAAATATAAGACAAGCACATTGTAACATTAGTAGAGCACAATGGAATGACACCTTAAAACACATAGTTGCAAAATTACAAGAACAATATGGGAATAAAACAATACAATTTAAGGAATCTGCAGGAGGGGACCCAGAAATTGCAATGCACAGTTTCAATTGTGGAGGGGAATTTTTCTACTGTGATTCAACACAACTGTTTAATAGCACTTGGAACGAGACTGGAGCGATAAATGGCACTGTAGGAAATGACACCATCACACTCCAATGTAAAATAAAACAAATTATAAACAGATGGCAGGAAGTAGGGAAAGCAATGTATGCCCCTCCCATCAAAGGACTAATTAAATGTTCATCAAATATTACAGGGCTGCTATTAACAAGAGATGGTGGTAACGAAACTAATACCACCAAACCCAATGTCGAGGTCTTCAGACCTGGAGGAGGAGATATGAGGGACAATTGGAGAAGTGAATTATATAAATATAAAGTAGTAAGAATTGAACCATTAGGAGTAGCACCTACCAGGGCAAAGAGAAGAGTGGTGCAGAGAGAAAAAAGAGCAGTGGGAACGCTGGGAGCTGTGTTCCTTGGGTTCTTGGGAGCAGCAGGAAGCACCATGGGCGCAGCGTCAATGGCGCTGACGGTACAGGCCAGACAATTATTGTCTGGTATAGTGCAACAGCAGAATAATCTGCTGAGGGCTATTGAGGCGCAACAACATCTGTTGCAACTCACAGTCTGGGGCATCAAGCAGCTCCAGGCACGAGTCCTGGCTGTGGAAAGATACCTAAGAGATCAACAGCTCCTAGGGATTTGGGGTTGCTCTGGAAAACTCATCTGCACCACTGCTGTGCCTTGGAATGCTAGTTGGAGTAATAAATCTCAGGATGAGATTTGGAATAACATGACCTGGATGGAGTGGGAAAGAGAAATTGACAATTACACAAGCATAATATACAACTTAATTGAAAAATCGCAGAACCAGCAAGAAAAGAATGAACAAGAATTATTGGAATTAGATAAGTGGGACAGTTTGTTGAGTTGGTTTAGCATAACAAACTGGCTGTGGTATATAAAAATATTCATAATGATAGTAGGAGGCTTGATAGGTTTAAGAATAGTTTTTACTGTACTTTCTATAGTGAATAGAGTTAGGCAGGGATACTCACCATTATCATTCCAGACCCACCTCCCAGCTCCGAGGGGACCCGACAGGCCCGACGGAATCGAAGAAGAAGGTGGAGACAGAGACAGAGACAGATCCGTACGATTAGTGAATGGATTCTTACCACTCATCTGGGACGATCTGCGGAGCCTGTGCCTCTTCAGCTACCACCGCTTGAGAGACTTACTCTTGACTGTAGCGAGGATTGTGGAACTTCTGGGACGCAGGGGGTGGGAAGCCCTCAAATATTGGTGGAGTCTCCTGCAGTATTGGAGTCAGGAACTAAAGAATAGTGCTGTTAGTTTGCTTAATACTACAGCTATAGTAGTAGCTGAGGGGACAGATAGGATTATAGAAGTAGTACAAATAATCTGTAGAGCTATCCGCCACATACCTAGAAGAATAAGACAGGGCTTCGAAAGGGCTTTACTATAAGATGGGGGGCAAGTGGTCAAAATATAGTGGATGGTCTACCATAAGGGAAAGAATGAGAAGAACTAGGCCAACAGCAGAGGAAAGGATGAGACAACCTGAACCAGCAGCAGAGGGGGTAGGAGCAGCATCTCGAGACTTGGAAAAACATGGAGCAATCACAAGTAGCAATACAGCAGCTACTAATGCTGATTGTGCTTGGCTAGAAGCACAAGAGGAGGA
>B.KR.97.WK_AF224507_D.UG.99.99UGE23438_AF484489
GGGTCTCTCTGGTTAGACCAGATCTGAGCCTGGGAGCTCTCTGGCTAACTAGGGAACCCACTGCTTAAGCCTCAATAAAGCTTGCCTTGAGTGCTCAAAGTAGTGTGTGCCCGTCTGTTGTGTGACTCTGGTAACTAGAGATCCCTCAGACCATTTTAGTCAGTGTGGAAAATCTCTAGCAGTGGCGCCCGAACAGGGACTTGAAAACGAAAGTAGAACCGGAGGAGCTCTCTCGACGCAGGACTCGGCTTGCTGAAGCGCGCACGGCAAGAGGCGAGGGGCGGCGACTGGTGAGTACGCCAAAAATTTTGACTAGCGGAGGCTAGAAGGAGAGAGATGGGTGCGAGAGCGTCAATATTAAGCGGGGGAGAATTAGATCAATGGGAAAAAATTCGGTTAAGGCCAGGAGGAAAGAAAAAATATAGGTTAAAACATCTAGTATGGGCAAGCAGGGAGCTAGAAAGGTTCGCAGTTAATCCTGGCCTGTTAGAAACATCAGAAGGTTGTAGACAAATATTGGGACAGCTACAACCATCCCTTCAGACAGGATCAGAAGAACTTAAATCATTATTTAATGCAGTAGCAGTCCTCTATTGTGTACATCAAAGGATAGAGATAAAAGACACCAAGGAAGCTTTAGAGAAAATAGAGGAAGAGCAAAGCAAAAGTAAGAAAAAGGCACAGCAAGCAACAGCTGACACAGGAAGCAGCAGCCAGGTCAGCCAAAATTACCCTATAGTGCAGAACCTCCAGGGGCAAATGGTACATCAGCCCATATCACCTAGAACTTTAAATGCACGGGTAAAAGTAATAGAAGAGAAGGCTTTCAGCCCAGAGGTAATACCCATGTTTTCAGCATTATCAGAAGGGGCCACCCCACAAGATTTAAACACCATGTTAAACACAGTGGGGGGACATCAAGCAGCTATGCAAATGTTAAAAGAGACCATCAATGAGGAAGCTGCAGACTGGGATAGATTGCATCCAGTGCATGCAGGGCCTATTGCACCAGGCCAGATGAGAGAACCAAGGGGAAGTGACATAGCAGGAACTACTAGTACCCTTCAGGAACAAATAGGATGGATGACAAATAATCCACCTATCCCAGTAGGAGAAATCTATAAAAGATGGATAATCCTGGGATTAAATAAAATAGTAAGAATGTATAGCCCTGCCAGCATTCTGGACATAAGACAAGGACCAAAGGAACCCTTTAGAGACTATGTAGACCGGTTCTATAAAACTCTAAGAGCCGAGCAAGCGTCACAGGAGGTAAAAAATTGGATGACAGAAACCTTGTTGGTCCAAAATGCAAACCCTGATTGTAAGACTATTTTAAAAGCATTGGGACCAGGAGCTACACTAGAAGAAATGATGACAGCATGTCAGGGAGTGGGAGGACCCAGCCATAAAGCAAGAGTTTTGGCTGAAGCAATGAGCCAAGCAACAAATTCAGCCACCATAATGATGCAGAGAGGCAATTTCAGGAACCAAAGAAGGACTGTTAAGTGTTTCAATTGTGGCAAAGAAGGGCACATAGCCAAAAATTGCAGGGCCCCTAGGAAAAAGGGATGTTGGAAATGTGGAAAGGAAGGACACCAAATGAAAGATTGTACTGAGAGACAGGCTAATTTTTTAGGGAAAATTTGGCCTTCCCACAAGGGAAGGCCAGGGAATTTCCTTCAGAGCAGACCAGAACCAACAGCCCCACCAGCAGAGAGCTTCGGGTTTGGGGAGGAGATAGCATCCTCCCAGAAACAGGAGCAGAAAGACAAGGAGCTGTATCCTTTGGCTTCCCTCAAATCACTCTTTGGCAACGACCCCTCGTCGCAATAAAGATAGGGGGGCAACTAAAGGAAGCTCTATTAGATACAGGAGCAGATGATACAGTATTAGAAGAAATGAGTTTACCAGGGAGATGGAAACCAAAAATGATAGGGGGAATTGGAGGTTTTATCAAAGTAAGACAGTATGATCAGGTAGCCATAGAAATCTGTGGACATAAAGCTATAGGTACAGTATTAATAGGACCTACACCTGTCAACATAATTGGAAGAAATCTGTTGACTCAGATTGGCTGCACTTTAAATTTTCCCATTAGTCCTATTGAAACTGTACCAGTAAAATTAAAGCCAGGAATGGATGGTCCAAAAGTTAAACAATGGCCATTGACAGAAGAAAAAATAAAGGCATTAGTAGAAATTTGTACAGAAATGGAAAAGGAAGGAAAAATTTCAAAAATTGGGCCTGAAAATCCATATAATACTCCAGTATTTGCTATAAAGAAAAAAGACAGTACTAAATGGAGAAAATTAGTAGATTTCAGAGAACTTAATAAGAGAACTCAAGACTTCTGGGAAGTTCAATTAGGAATACCACATCCAGCAGGGTTAAAAAAGAAAAAATCAGTAACAGTACTGGATGTGGGTGATGCATATTTTTCAGTTCCCTTAGATGAGGACTTCAGAAAGTATACTGCATTTACCATACCTAGTACAAACAATGAGACACCAGGGATTAGATATCAGTACAATGTGCTTCCACAGGGGTGGAAAGGATCGCCAGCGATATTCCAAAGTAGCATGACAAAAATCTTAGAGCCTTTTAGAAAACAAAATCCAGACATAGTTATCTATCAATACATGGATGATTTATATGTAGGATCTGACTTAGAAATAGGACAGCATAGAATAAAAATAGAGGAACTGAGACAACATCTGTTGAGGTGGGGGTTTACCACACCAGACAAAAAACATCAGAAAGAGCCTCCATTCCTTTGGATGGGTTATGAACTCCATCCTGATAAATGGACAGTACAGCCTATAGTGCTACCAGAAAAAGATAGCTGGACTGTCAATGACATACAGAAGTTAGTGGGAAAACTGAATTGGGCAAGTCAGATTTATGCAGGCATTAAAGTAAAGCAATTATGTAAACTCCTTAGGGGAACCAAGGCACTAACAGAAGTAGTACCACTAACAGAAGAAGCAGAGCTAGAACTGGCAGAAAACAGGGAAATTCTAAAAGAACCAGTACATGGAGTGTATTATGACCCAGCAAAAGACTTAATAGCAGAGATACAGAAGCAGGGGCAAGGCCAATGGACATATCAAATTTATCAAGAGCCATTTAAAAATCTAAAAACAGGAAAATATGCAAGAATGAGGGGTGCCCACACTAATGATGTAAAACAATTAACAGAGGCTGTGCAAAAAGTAGCCATAGAAAGCATAGTAATATGGGGAAAGACTCCTAAATTTAAACTACCCATACAAAAAGAAACATGGGAAGCATGGTGGACAGAGTATTGGCAAGCCACTTGGATTCCTGAGTGGGAGTTTGTCAATACCCCTCCCTTAGTGAAGTTATGGTACCAGTTAGAGAAAGAACCCATAGTAGGAGCAGAAACTTTCTATGTAGATGGGGCAGCTAATAGGGAAACTAAATTAGGAAAAGCAGGATATGTTACTGACAGAGGAAGACAAAAGGTTGTCCCCCTAACGGACACAACAAATCAGAAGACTGAGTTACAAGCAATTCATCTAGCTTTGCAGGATTCAGGATTAGAAGTAAACATAGTAACAGACTCACAATATGCATTAGGAATCATTCAAGCACAACCAGATAAAAGTGAATCAGAGTTAGTCAGCCAAATAATCGAGCAGTTAATAAAAAAGGAAAAGGTCTACCTGGCATGGGTACCAGCACACAAAGGAATTGGAGGAAATGAACAAGTAGATAAATTAGTCAGTGCTGGAATCAGGAAAGTACTGTTTCTAGATGGAATAGATAAGGCCCAAGAAGAGCATGAAAAATATCACAGTAATTGGAGAGCAATGGCTGGTGATTTTAACCTGCCACCTGTGGTAGCAAAAGAAATAGTAGCCTGCTGTGATAAATGTCAGCTAAAAGGAGAAGCCATGCATGGACAAGTAGACTGTAGTCCAGGAATATGGCAGCTAGATTGTACACATTTAGAAGGAAAAGTTATCCTGGTAGCAGTTCATGTAGCCAGTGGATATATAGAAGCAGAAGTTATTCCAGCAGAGACAGGGCAGGAAACAGCATACTTTCTCTTAAAATTAGCAGGAAGATGGCCAGTAAAAACAATACATACAGACAATGGCAGCAATTTCACCAGTAATACAGTTAAGGCCGCCTGTTGGTAGGCGAGGATCAAGCAGGAATTTGGCATTCCCTACAATCCCCAAAGTCAAGGAGTAGTAGAATCTATGAATAAAGAATTAAAGAAAATTATAGGACAGGTAAGAGATCAAGCTGAACATCTTAAGACAGCAGTACAAATGGCAGTATTCATCCACAATTTTAAAAGAAAAGGGGGGATTGGGGGGTACAGTGCAGGGGAAAGGATAATAGACATAATAGCAACAGACATACAGACCAAAGAACTACAAAAACAAGTTACAAAAATTCAAAATTTTCGGGTTTATTACAGGGACAGCAGAGATCCACTTTGGAAAGGACCAGCAAAGCTTCTCTGGAAAGGTGAAGGGGCAGTAGTGATACAAGATAATAGTGACATAAAAGTAGTGCCAAGAAGAAAAGCAAAGATCATTAGGGATTATGGAAAACAGATGGCAGGTGATGATTGTGTGGCAAGTAGACAGGATGAGGATTAAAACATGGAAAAGTTTAGTAAAACACCATATGTATATTTCAAAGAAAGCTAAGGAATGGGTCTATAGACATCACTATGAAAGCACTCATCCAAGAATAAGTTCAGAAGTACACATCCCACTAGGGGATGCTAAATTAGTAATAACAACATATTGGGGTCTGCATACAGGAGAAAGAGAATGGCATCTGGGTCAGGGAGTCTCCATAGAATGGAGGAAAAAGAGATATAATACACAAGTAGACCCTGACCTAGCAGACAAACTAATCCACCTGCATTATTTTGATTGTTTTTCAGACTCTGCTATAAGACATGCCATATTAGGACATAGAGTTAGGCCTAAGTGTGAATATCAAGCAGGACATAACAAGGTAGGGTCTCTACAGTACTTGGCACTAACAGCATTAATAACACCAAAAAAGATAAAGCCACCTTTGCCTAGTGTTAGGAAACTAACAGAGGATAGATGGAACAAGCCCCAGAAGACCAAGGGCCACAGAGGGAGCCATACAATGAATGGACACTAGAGCTCTCAGAGGAACTTAAGAGTGAAGCTGTTAGACATTTTCCTAGGCCATGGCTCCATAGCTTAGGACAACATATCTATGAAACTTATGGGGATACTTGGACAGGAGTAGAAGCCATAATAAGAATTCTGCAACAACTGCTGTTTATTCATTTCAGAATTGGATGTCACCATAGCAGGTTAGGCATTATTCGACAGAGGAGAGCAAGGAATGGAGCCAGTAGATCCTAGACTAGAGCCCTGGAAGCATCCAGGAAGTCAGCCTAAGACTCCTTGTACCAAATGCTATTGTAAAAAGTGTTGCCTTCATTGTCAAGTTTGCTTCATGACAAAAGGCTTAGGCATATCCTATGGCAGGAAGAAGCGGAGACAGCGACGAAGAGCTCCTCAGGACAATAAGAATCATCAAGTTTCTCTATCAAAGCAGTAAGTAATACGTGTGATGCAACTTTTAGCAATATTAGCAATAGTAGGATTAGTAGTAGCAGCAATATTAGCAATAGTTGTGTGGTTCATAGTATTCATAGAATATAAGAAAATATTAAAACAAAAAAAAATAGACAGGTTAATTGATAGAATAAGAGAAAGAGCAGAAGACAGTGGCAATGAGAGTGAAGGGGATCAGGAAGAATTATCAGCACTGGTGGAGATGGGGCATCATGCTCCTTGGGATGTGGATGATCTGTAGTGCTGCAGAAAAATTGTGGGTCACAGTCTATTATGGGGTACCTGTGTGGAAAGAAGCAACCACCACCCTATTCTGTGCATCAGACGCTAAAGCATATGACACAGAGGTACATAATGTTTGGGCCACACATGCCTGTGTACCCATAGACCCCAACCCACAAGAAGTATTTTTGGAAAATGTGACAGAAAATTTTAACATGTGGAAAAATAACATGGTAGAACAGATGCATGAGGATATAATCAGTTTATGGGATCAAAGCCTAAAGCCATGTGTAAAACTAACTCCACTCTGTGTTACTTTAAAGTGCACTGATTTGAATGATACTAATACCAATAATAGTAGTACTTCGGAAAATAATACTAATCCCACTATTAGTGGTGGGGAAGGGATGGGGGAAGGAGAGATGAAAAACTGCTCTTTCAATGTTACCACAAACATAAGAGATAAGGTGCAGAAAGAATATGCTCTTTTCTATAAACTTGATATAATACCAATAGATAATACAAGCTATGCATTGAGACATTGTAACACCTCAGTCATTACACAGGCCTGTCCAAAGGTATCCTTTGAACCAATTCCCATACATTATTGTGCCCCGGCTGGTTTTGCGATTCTACAATGTAATGATAAGAAGTTCAATGGAACAGGACCATGTTCAAATGTCAGCACAGTACAATGTACACATGGAATTAGGCCAGTAGTATCAACTCAACTGCTGTTAAATGGCAGTCTAGCAGAAGAAGAGATAGTACTTAGATCTGAAAATTTCACAAACAATGCTAAAACCATAATAGTACAGCTGAATGCATCTGTAGAAATTAATTGTACAAGACTCAACAACAATACAAGGAAAAGTATAAGGATAGGACCAGGAAGCACATTTTATGCAACAGGAGCCATAATAGGAGATATAAGACAAGCACATTGTAACATTAGTAGAGAAAAATGGAATGACACTTTAAAACAGCTAGTTATAAAATTAGGAGAGCAATTTGGGAATAGTAACATAATAGTCTTTAAACAATCCTCAGGAGGGGACCCAGAGATTGTAATGCACAGTTTTATTTGTGGAGGGGAGTTTTTCTACTGTAATACAACACAACTGTCTAATAGTACTTGGCAGAGGTCTGATGGTACTTGGAATAGAACTGGAGGGTTAAATGAAACTAAAGAAAATATCACACTCCCATGCAGAATAAAACAAATTATAAACAGGTGGCAGGAAGTAGGAAAAGCAATGTATGCCCCTCCCATCAGTGGACTAATTAGATGTTCATCAAATATTACAGGGCTGCTATTAACAAGAGATGGGGGGAATGAGAACAATGGGACCAATGGGACTGAGACCTTCAGACCTGAGGGAGGAAATATGAAGGACAATTGGAGAAGTAAATTATATAAATATAAAGTAGTAAGAATTGAGCCATTAGGGATAGCACCCACCAGGGCAAGGAGAAGAGTGGTGCAGAGAGAAAAAAGAGCAGTAACATTCGGAGCTCTGTTCCTTGGGTTCTTGGGAGCAGCAGGAAGCACTATGGGCTGCACGTCAATGACGCTGACGGTACAGGCCAGACTATTATTGTCTGGTATAGTGCAACAGCAGAATAATTTGCTGAGAGCTATTGAGGCGCAACAGCATCTGTTGCAACTCACAGTCTGGGGCATCAAGCAGCTACAGGCAAGAGTCCTGGCTGTGGAAAGGTACCTAAGAGATCAACAGCTCCTGGGGATTTGGGGATGCTCTGGAAAGCTCATCTGCACCACTAATGTGCCTTGGAATACTAGTTGGAGTAATAAATCTGAGAATGAGATCTGGGATAACATGACCTGGATGGAGTGGGACAGAGAAATTAACAATTACACAAACTTAATATACGACCTACTTGAAAAATCGCAGAACCAACAAGAAAAAAATGAACAGGAACTATTGGAATTGGATAAATGGGCAAGTTTGTGAAATTGGTTTAACATAACAAAATGGCTGTGGTATATAAAAATATTCATAATGATAGTAGGAGGCTTAGTAGGTTTAAGAATAATTTTCTTTGTACTTTCTATAGTGAATAGAGTTAGGCAGGGATACTCACCATTATCGTTTCAGACCCACTTCCCGAGCCCGAGGGGACCCGACAGGCCAGGAGGAATCGAAGGAGAAGGTGGAGAAGGAGACAGTGGTGGATCCAGTCACTTAGTGGATGGATTCTTAACACTCATCTGGGTCGACCTGCGGAGCCTGTGCCTCTTCAGCTACCACCTCTTGAGAGACTTACTCTTGATTGTAACGAGGAGTGTGGAACTTCTGGGACTCAGGGGGTGGGAAATCCTCAAATACTTGTGGAATCTCCTGCAGTATTGGAGTCAGGAACTAAAGAATAGTGCTGTTAGTTTGCTTAATGCCACAGCTGTAGCAGTAGCTGAGGGGACAGATAGGATTATAGAAATATTACAAAGAGCTTATAGAGCTATTCTCAACATACCTAGAAGAATAAGACAGGGCTTGGAAAGGGCTTTGCTATAAGATGGGTGGCAAGTGGTCAAAACGTAGTGTGCCAGGGTGGAATACTATAAGGAAAAGAATGAGACGAGCTGAGCCAGCAGCAGAAGGGGTGGGAGCAGCATCTCGAGACCTGGAACAACGTGGAGCAATCACAACTAGTAATACAGCAAGTAACAATGCTGCTTGTGCCTGGCAGGAAGCACAAGAGGAGGAGGAGGTGGGTTTTCCAGTCAGACCTCAGGTACCCTTAAGACCAATGACTTACAAGTCAGCTTTAGATCTCAGCCACTTTTTAAAAGAAAAGGGGGGGCTGGAAGGGCTAGTTTACTCCCAAAAAAGACAAGATATCCTTGATCTGTGGGTCTACCACACACAAGGCTTCTTCCCTGATTGGCAGAACTACACACCAGGGCCAGGGACCAGATTTCCACTGACCTTCGGGTGGTGCTTCAAGCTAGTACCAGTTGAGCCAGAAAAGGTAGAAGAGGCCACTGTAGGAAAAAACAACTGCTTGTTACACCCCATGAACCTGCATGGAATGGATGACCCAGAGGGAGAAGTGTTAGTGTGGAGATTTGACAGCCGCCTAGCATTTCATCACATGGCCCGAGAGAAACATCCGGAGTACTACAAGGACTGCTGACATCGAGCTAAGGACTGCTGACATCGAACTTTCTACAAGGGACTTTCCGCTGGGGACTTTCCGCAGGGAGGCGTGGACTGGGCGGGACTGGGGAGTGGCGAGCCCTCAGATGCTGCATAAAAGCAGCTGCTTTTTGCCTGTACTGGGTCTCTCTGGTTAGACCAGATCTGAGCCTGGGAGCTCTCTGGCTAACTAGGGAACCCACTGCTTAAGCCTCAATAAAGCTTGCCTTGAGTGCTTCAAGT
>B.RU.04.04RU139089_AY751407_F1.FR.96.MP411_AJ249238
AGTGGCGCCCGAACAGGGACTTGAAAGCGAAAGTAGAACCAGAGAAGCTCTCTCGACGCAGGACTCGGCTTGCTGAAGCGCGCACAGCAAGAGGCGAGGGGCGGCGACTGGTGAGTACGCCAAAAATAAAATTTCTGACTAGCGGAGGCTAGAAGGAGAGAGATGGGTGCGAGAGCGTCAGTATTAAGCGGGGGTGAATTAGATAGATGGGAAAAAATTCGATTAAGGCCAGGGGGAAAGAAAAAATATAGATTAAAACATATAGTATGGGCAAGCAGGGAGCTAGAACGATTTGCAGTTAATCCTGGCCTTTTAGAAACATCAGGAGGCTGTAGACAAATACTAGAACAGCTACAACCAGCCCTTCAGACAGGATCAGAAGAACTTAGATCCTTATATAATACAATAGCAACCCTCTATTGTGTGCATAGCAAGATAGAGGTAAAAGACACCAAGGAAGCTTTAGAGAAGATAGAGGAAGAGCAAAACAAAAGTAAGAAAAGGACACAGCAAGCAGCAGCTGACACAGGAAACAGCGGCCAGGTCAGCCAAAATTACCCTATAGTACAGAACCTCCAGGGGCAAATGGTACATCAGCCCCTATCACCTAGAACTTTAAATGCATGGGTAAAAGTAGTAGAAGAAAAGGCTTTTAGCCCAGAAGTAATACCCATGTTTTCAGCATTATCAGAAGGGGCCACCCCACAAGACTTAAATACCATGCTAAACACAGTGGGGGGACATCAAGCAGCCATGCAAATGTTAAAAGAGACCATCAATGAGGAAGCTGCAGACTGGGATAGATTGCATCCAGTACATGCAGGGCCTATTGCACCAGGCCAGATGAGAGAACCAAGGGGAAGTGACATAGCAGGAACTACTAGTACCCTTCAGGAACAAATAGGGTGGATGACACATAATCCACCTATCCCAGTAGGAGAAATCTATAAAAGATGGATAATTCTGGGATTAAATAAAATAGTAAGAATGTATAGTCCTACCAGCATTCTGGACATAAGGCAGGGACCAAAAGAACCTTTTAGAGACTATGTAGACCGGTTCTATAAAACTCTAAGAGCCGAGCAAGCTTCACAGGAGGTAAAAAATTGGATGACAGAAACCTTGTTGGTCCAAAATGCGAACCCAGATTGTAAAACTATCTTAAAAGCATTAGGACCAGCAGCTACACTAGAAGAAATGATGACCGCATGTCAGGGAGTAGGGGGGCCCGGCCATAAAGCAAGAGTTTTGGCTGAAGCAATGAGCCAAGTAACAAATTCTTCAGCTACAATGATGATGCAGAGGGGCAATTTTAGGAACCAAAGAAAGCTTGTTAAGTGTTTCAATTGTGGCAAAGAAGGGCATATAGCCAAAAATTGCAGGGCCCCTAGGAAAAAGGGCTGTTGGAAATGTGGAAAAGAAGGACACCAAATGAAAGATTGTATTGAGAGACAAGCTAATTTTTTAGGGAAGCTCTGGCCTTCCCACAAGGGAAGGCCAGGGAATTTTCCTCAGAGCAGATCAGAGCCAACAGCCCCACCAGAAGAGAGCTTCAGGTTTGGGGAGGAAACAACAACTCCCTCTCAGAAACAGGAGCCGATAGACAAGGAACTATATCCCTTAGTTTCCCTCAAATCACTTTTTGGCAGCGACCCTTAGTCACCATAAGAGTGGGGGGACAGCTAAGGGAAGCTCTATTAGATACAGGAGCAGATGATACAGTATTAGAAGACATAGATTTGCCAGGAAAATGGAAACCAAAAATAATAGGGGGAATTGGAGGTTTTATCAAAGTAAAACAGTATGATCAAATAACCATAGATATTTGTGGACATAAAACTAAAGGTACAGTGTTAGTAGGACCTACACCTGTCAACATAATTGGAAGAAATCTGCTGACTCAGCTTGGCTGCACTTTAAATTTTCCCATTAGTCCTATTGAGACTGTACCAGTAAAATTAAAGCCAGGAATGGATGGCCCAAAAGTTAAACAATGGCCATTGACAGAAGAAAAAATAAAAGCATTAGTAGAAATTTGTACAGAAATGGAGAAGGAAGGAAAAATTTCAAAAATTGGGCCTGAAAACCCATACAATACTCCAGTATTTGCCATAAAGAAAAAAGACAGTACTAAATGGAGAAAATTAGTAGATTTTAGAGAGCTTAATAAAAGAACTCAAGACTTCTGGGAAGTTCAATTAGGGATACCACATCCTGCAGGGTTAAAAAGGAAAAAATCAGTAACAGTACTGGATGTGGGTGATGCATATTTTTCAGTTCCCTTAGATAAAGACTTCAGGAAGTATACTGCATTCACCATACCTAGTATAAACAATGAGACACCAGGGTTTAGATATCAGTACAATGTGCTTCCACAGGGGTGGAAAGGATCACCAGCAATATTCCAATGTACCATGACAAGGATCTTAGAGCCTTTTAGAAAACAAAATCCAGACATGGTTATCTATCAATATATGGATGATTTGTATGTAGGATCTGACTTAGAAATAGGGCAGCATAGAACAAAGATAGAGGAACTAAGACAACATCTGTTAAGGTGGGGATTTACAACACCAGACAAAAAACACCAAAAGGAACCTCCATTCCTTTGGATGGGTTATGAACTACATCCTGATAAATGGACAGTACAGCCTATAGAGCTGCCAGAAAAGGATAGCTGGACTGTCAATGACATACAGAAGTTAGTGGGAAAATTGAATTGGGCAAGCCAGATTTACCCAGGGATTAAAGTAAAGCAATTATGTAAACTCCTTAGGGGAGCCAAAGCACTAACACAAGTAATCCCACTAACTAAAGAAGCAGAGCTAGAATTGGCAGAAAACAGGGAGATTCTAAGAGAACCAGTACATGGAGTGTATTATGACCCATCAAAAGACTTAATAGCAGAAATACAGAAGCAGGAACAAGGCCAATGGACATATCAAATTTATCAAGAGCCATTTAAAAATCTGAAAACAGGAAAGTATGCAAAAATGAGGGGTGCCCACACTAATGATGTAAGGCAATTAGTAGAAGCAGTGCACAAAATAACCATGGAAAGCATAGTCATATGGGGAAAGACCCCTAAATTTAAACTACCCATACAAAAGGAAACATGGGAAACATGGTGGACAGAGTATTGGCAAGCCACCTGGATTCCTGAATGGGAGTTTGTCAATACCCCTCCCTTAGTAAAATTATGGTACCAGTTAGAGAAAGAACCCATAACAGGAGCAGAAACTTTCTATGTAGATGGGGCAGCTAATAGGGAGACTAAATTAGGAAAAGCAGGGTATGTTACTGACAGAGGAAGACAAAAAGTTGTCTCCTTTAATGACACAACAAATCAGAAGACTGAGTTACAAGCAATCCATCTAGCTTTGCAGGATTCAGGAGCAGAAGTAAATATAGTTACAGACTCACAATATGCATTAGGAATCATTCAAGCACAACCAGATAAAAGTGAATCAGAGTTAGTCAGTCAAATAATAGAGCAATTAATAAAAAAGGAAAAGATCTACCTGGCATGGGTACCAGCACACAAAGGAATTGGAGGAAATGAACAAGTAGATAAATTAGTCAGTTCTGGGATCAGGAAAGTACTATTTTTAGATGGAATAGATAAAGCCCAAGAAGATCATGAGAAATATCACAGTAACTGGAAAGCAATGGCTAGTGATTTTAACCTGCCACCTRTAGTAGCAAAAGAAATAGTAGCCARCTGTGATAAATGTCARTTAAAAGGAGAAGCCATGCATGGACAAGTAGACTGTAGTCCAGGAATATGGCAACTAGATTGTACACATTTGGAAGGAAAAATTATCCTGGTAGCAGTTCATGTAGCYAGTGGATATATAGAAGCAGAAGTTATCCCAGCAGAGACAGGGCAAGAAACAGCATACTTTATCTTAAAATTAGCAGGAAGATGGCCAGTTAAAACGATACATACAGACAATGGCAGCAATTTCATCAGCGCCACGGTTAAGGCCGCCTGCTGGTGGGCAGGGATCAAGCAAGAGTTTGGCATTCCCTACAATCCCCAAAGTCAAGGAGTAATAGAATCTATGAATAAAGAATTAAAGAAAATTATAGGACAGGTAAGAGATCAGGCTGAACATCTTAAGACAGCAGTACAAATGGCAGTATTCATCCACAATTTTAAAAGAAAAGGGGGGATTGGGGGGTACAGTGCAGGAGAAAGAATAGTAGACATAATAGCATCAGATATACAAACTAAAGAATTACAAAAACAAATTACAAAAATCCAAAATTTTCGGGTTTATTACAGGGACAGCAGAGATCCACTTTGGAAAGGACCAGCAAAGCTTCTTTGGAAAGGTGAAGGGGCAGTAGTAATACAAGATAACAGTGACATAAAAGTAGTGCCAAGAAGAAAAGCAAAGATCATTAGGGATTATGGAAAACAGATGGCAGGTGATGATTGTGTGGCAAGTAGACAGGATGAGGATTAGAGCATGGAACAGTTTAGTAAAACACCATAAGTATATTTCAAAGAAAGCTAAGGGATGGTTTTATAGACACCATTATGAAAGCACTCATCCAAAAATAAGTTCAGAAGTACACATCCCATTAGAGGATGGAAAATTAGTAATAACAACATATTGGGGTCTGAATACAGGAGAAAGAGATTGGCATTTGGGTCAGGGAGTCTCCATAGAATGGAGGAAAAGGAGATATAGCACTCAAGTAGACCCTAACCTAGCAGACCAACTAATTCACCTGCATTATTTTGATTGTTTTTCAGAGTCTGCTATAAGAAATGCCATATTAGGACGTATAGTTAGTCCTAGGTGTGAATATCAAGCAGGACATAACAAGGTAGGATCCTTACAGTACTTGGCACTAACAGCATTAATACCATCAAAAAAGAATAAGCCACCTTTGCCTAGTGTTAGGAAACTGACAGAGGATAGATGGAACAAGCCCCAGAAGACCAAGGGCCACAGAGGGAACCATACAATGAATGGACACTAGAGCTTTTAGAGGACCTTAAGAGTGAAGCTGTTAGACACTTTCCTAGACTATGGCTACATGCCTTAGGACAACATATCCATGAAACTTATGGGGATACTTGGGCAGGAGTAGAAGCCATAATAAGAACTCTGCAACAGCTGCTGTTTGTTCATTACAGAATTGGATGTCAACATAGCAGAATAGGCATTACTCAACGGAGGAGAGCAAGGAATGGATCCAGTAGATCCTAGATTAGAGCCCTGGAAGCATCCAGGAAGTCAGCCTAAGACTGCTTGTAACAAATGCTATTGTAAAAAGTGTTGCCTTCATTGCCAAGTTTGTTTCATAAGCAAAGGCTTAGGCATCTCCTATGGCAGGAAGAAGCGGAGACAGCGACGAAGAGCTCCTCAAGACAATCCGACTCATCAAGTTCCTCTACCAAAGCAGTAAGTAGTACATGTAATGCAACCTTTAAGCATAGTAGCAATAGTAGCATTAGTAGTAGTAGCAATAATAGCAATAGTTGTGTGGACCATAGTGCTCATAGAATATAGGAAAATAGTGAGACAAAGAAAAATAGATAGATTAATTGATAGAATAGTAGAAAGAGCAGAAGACAGTGGCAATGAGAGTGAAGGAGACCAGGAAGAACTATCAGCACTTATGGAAATGGGGCATCATGCTCCTTGGAATGTTGATGATCTGTAGTACCGCAGAACAATTGTGGGTCACAGTCTATTATGGGGTACCTGTGTGGAAAGAAGCAACTACCACTTTATTTTGTGCATCAGATGCTAAAGCATATGACACAGAGGTACATAATGTTTGGGCCACACATGCCTGTGTTCCCACAGACCCTAGCCCACAAGAAGTAAGACTGGAAAATGTGTCAGAAGACTTTAACATGTGGAAAAATAACATGGTAGAACAGATGCATGAGGATATAATCAGTTTATGGGATCAAAGCCTAAAGCCATGTGTAAAATTAACCCCACTTTGTGTTACTTTAAATTGCACTGATGCTAAGAATAATGCCACTAATACCAATAATAGTACTGTGGAAAAGATGGAACAAGGAGAAATAAAAAACTGTTCTTTTAATATCACCACAAGCATAACAAATAAGATGCAGAAAGAATATGCACTTTTCTATAAACTTGATCTAGCACCAATTGATAATGATACAAGCTATACATTGATAAGTTGTAACACCTCAGTCCTTACACAGGCCTGTCCAAAGATATCCTTTGAACCAATTCCCATACATTATTGTGCCCCGGCTGGTTTTGCGATTCTAAAGTGTAATGATAAGACGTTCAATGGAACAGGACCATGTACAAATGTCAGCACAGTACAATGTACACATGGAATTAGGCCAGTGGTGTCAACTCAACTGCTGTTAAATGGCAGTTTAGCAGAAGGAGAGGTAGTAATTAGATCTGAAAATTTCACAGACAATGCTAAAAACATATTGGTACAGCTGAATGAAGCTGTAGAAATTAATTGTACAAGACCCAACAACAATACAAGAAAAAGTATACATATGGGACTGGGGAGAGCATTTTATGCAACAGGAGACATAATAGGAGATATAAGACAAGCACATTGTAACATTAGTGCAACAAAATGGAATAACACGTTAGCACAGATAGCTAAAAAATTACAAGAACACTTTAGGAATAAAACAATAGTCTTTAATCACTCCTCAGGAGGGGACCCAGAAATTGTAATGCACAGTTTTAATTGTGGAGGGGAATTTTTCTACTGTAATTCAACAAAACTGTTTAACAGGACTTGGCTGACTAATGATACTTGGAATGATACTACAGATAACAATGGAACTATCACACTCCCATGCAGAATAAGACAAATTATAAACAGATGGCAGGAGGTAGGAAAAGCAATGTATGCCCCTCCCATCAGTGGACTAATTAGATGTTCATCAAATATCACAGGGTTGATATTAACAAGAGATGGTGGGGGTGGGAACGAGAGCGAGAACAAGGAGACCTTCAGACCTGGAGGAGGAAATATGAGGGACAATTGGAGAAGTGAATTATATAAATATAAAGTAGTAAAAATTGAACCATTAGGAGTAGCACCCACCAGGGCAAAGAGGAGAGTGGTGCAGAGAGAAAAAAGAGCAATAGGAGCACTAGGAGCTATGTTCCTTGGGTTCTTGGGAGCAGCAGGAAGCACTATGGGCRCAGCGTCACTGACGCTGACGGTACAGGCCAGACTATTATTGTCTGGTATAGTGCAACAGCAGAATAATCTGCTGAGGGCTATTGAGGCGCAACAGCATCTGTTGCAACTCACAGTCTGGGGCATCAAGCAGCTCCAGGCTAGAGTCCTGGCTGTGGAAAGATACCTAAAGGATCAACAGCTCCTAGGGATTTGGGGTTGCTCTGGGAAACTCATTTGCACCACCGCTGTGCCTTGGAATGCTAGTTGGAGTAATAAATCACTAAATGAGATTTGGGATAACATGACCTGGATGGAGTGGGAAAGAGAAATTAACAATTACACAGGATTAATATACACCTTAATTGAAGAATCGCAGAACCAACAGGAAAAGAATGAACAAGAATTATTGGCATTGGATACATGGGCAAATTTGTGGAGTTGGTTTGATATATCAAATTGGCTGTGGTATATAAAAATATTCATAATGATAATAGGAGGGTTAGTAGGTTTAAGAATAATCTTTACTGTGCTTTCTATAGTGAATAGAGTTAGGCAGGGATACTCACCATTATCATTTCAGACCCGCCTCCCAGTCAGGAGGGAACCCGACAGGCCCGGAGAAATCGAAGAAGAAGGTGGAGAGCGAGACAGAGACACATCAACACCATTAGTAGCTGGATTCTTAGCACTCATCTGGGACGACCTACGGAGCCTGTGCCTCTTCAGCTACCACCGCTTGAGAGACTTACTCTTGATTGTAGTGAGGATTGTGGAACTTCTGGGACGCAGGGGGTGGGAGGCCCTCAAATATTGGTGGAATCTCCTGCAGTATTGGAGTCAGGAACTAAAGAATAGTGCTGTTAGTTTGTTTAACGCCACCGCTATAGCAGTAGCTGAGGGGACAGATAGAGTTATAGAAGTAATACAAAGAACTTGTAGAGCTGTCCTCCATATACCTAGAAGAATAAGACAGGGCTTAGAAAGGGCTTTGCAATAAGATGGGGGGCAAGTGGTCAAAACGTAGTGGATGGAGTGCTGTAAGGGAAAAAATGCACCGAACTGAGCCAGCGGCAGACGGGGTGGGAGCAGTATCTCGGGACCTGGAAAAACATGGAGCAATCWCAAGTAGTAATACAGCAGCTACTAATGCTGATTGTGCCTGGCTAGAAGCACAAGAGAGTGAGGAGGTGGGTTTTCCAGTCAGACCTCAGGTACCGTTAAGACCAATGGATTACAAGGGAGCTGTAGATCTTAGCCACTTTTTAAGAAAAGAGGGGGGACTGGATGGGCTAATTTACTCCCAGAAAAGACAAGATATCCTTGATCTGTGGGTTTACCACACACAAGGCTACTTCCCTGATTGGCAGAACTACACACCAGGGCCAGGGATCAGATATCCACTGACCCTTGGATGGTGCTACAAGCTAGTACCAGTTAAGTCAGAGCAGGTGGAAGAAGCCAATAGAGGAGAGAACAACTGCTTGTTACACCCTATGAGCCAGCATGGAATGGAGGACCCGGAGAGAGAAGTATTAGAATGGAGGTTTGACAGCCGCCTGGCATTTCATCACGTAGCCCGAGAGATGCATCCGGAGTACTACAAAGACTGCTGACATCGAGATTTCTACAAGGGACTTTCCGCTGGGGACTTTCCAGGGAGGTGTGGCCTGGGCGGGACCGGGGAGTGGCGAGCCCTCAGATGCTGCATATAAGCAGCTGCTTTCTGCCTGTACTGGGTCTCTCTGGTTAGACCAGATCTGAGCCTGGGAGCTCTCTGGCTAACTAGGGAACCCACTGCT
>B.YE.02.02YE507_AY795904_F2.CM.97.CM53657_AF377956
GCGAGAGCGTCAGTATTAAGCGGGGGAAAATTGGATAGATGGGAAAGAATTCGGTTGAGGCCAGGGGGAAACAAAAAGTATAAATTAAAACATATAGTATGGGCAAGCAGGGAGCTAGAACGATTTGCAGTTAACCCTGGTCTATTAGAAACAGCAGAAGGCTGTAGACAAATATTGGGACAGCTACAACCTTCCCTTCAGACAGGATCAGAAGAACTTAAATCATTATTTAATACAGTAGCAGTCCTCTATTGTGTGCATCAACAGATAGATGTAAAAGACACCAAGGAAGCTTTAGACAAGATAGAGGAAGAGCAAAACAAAAGTAAGAAAAAAGCACAGCAAGCAGCAGCTGACACAGGAAGTAGCAGCCAGGTCAGCCAAAATTACCCCATAGTGCAAAACCTTCAGGGGCAAATGGTACATCAGGCCCTGTCACCTAGAACTTTAAATGCATGGGTAAAAGTAATAGAAGAAAAGGCTTTCAGCCCAGAAGTAATACCCATGTTTACAGCATTATCAGAAGGAGCCACCCCACAAGATTTAAACACCATGCTAAACACAGTGGGAGGACATCAAGCAGCCATGCAAATGTTAAAAGATACCATCAATGAGGAAGCTGCAGAATGGGATAGAACGCATCCAGTGCATGCAGGACCTGTTGCACCAGGCCAAATGAGAGAACCAAGGGGAAGTGACATAGCAGGAACTACTAGTACCCTTCAGGAACAAATAGGATGGATGACAAGTAATCCACCTATGCCAGTAGGAGAAATCTATAAAAGGTGGATAATCCTGGGATTAAATAAAATAGTAAGGATGTATAGTCCTACCAGCATTCTGGACATAAAACAAGGACCAAAAGAACCCTTTAGAGACTATGTAGACCGGTTCTATAAAACTCTAAGAGCCGAGCAAGCTTCACAGGATGTGAAGAATTGGATGACAGAAACCTTGTTAGTCCAAAATTCGAACCCAGACTGTAAGACTATTCTAAAAGCATTGGGACCAGGAGCTACACTAGAAGAAATGATGACAGCATGTCAGGGAGTGGGAGGACCTGGCCATAAAGCTAGAGTTTTGGCAGAAGCTATGAGCCAAATGAGCCAAATGACAAATCCAGCTACCATCATGATGCAGAAAGGCAATTTTAGGAACCAAAGAAAGCCTGTTAAGTGTTTCAATTGTGGCAAAGAGGGGCACATAGCCAGAAATTGCAAGGCTCCTAGGAAAAGGGGCTGTTGGAAATGTGGAAAAGAAGGCCACCAAATGAAAGATTGTACTGAGAGACAGGCTAATTTTTTAGGGAAAATCTGGCCTTCCCACAAGGGGAGGCCAGGGAATTTTCTTCAGAGCAGACCAGAGCCGACAGCCCCACCAGCAGAGAGCTTCAAGTTTGGGGAAGAGACAACAGCTCCCTCTCAGAAGCAGGAGCGGATAGACAAGGAGGAGATGTATCCCTTAGCTTCCCTCAGATCACTCTTTGGCAACGACCCATTGTCACAGTAAAAATAGGGGGACAAATAAAGGAAGCTCTATTAGATACAGGAGCAGATGATACAGTATTAGAAGAAATGAATTTGCCAGGAAAATGGAAACCAAAAATGATAGGGGGAATTGGAGGTTTTATTAAAGTAAGACAGTATGAACAGATACCCATAGAAATCAGTGGACATAAAGCTATAGGTACAGTATTAGTAGGACCTACACCTGTCAACATAATTGGAAGAAATCTGTTGACTCAAATTGGTTGCACTTTAAATTTTCCCATTAGTCCTATTGAAACTGTACCAGTAAAATTAAAGTCAGGAATGGATGGCCCAAAAGTTAAACAATGGCCATTGACAGAAGAAAAAATAAAAGCATTAATAGAAATATGTTCAGAAATGGAAAAGGAAGGGAAAATTTCAAAAATTGGGCCTGAAAATCCATACAATACTCCAGTATTTGCCATAAAGAAAAAAGATAGTACTAAATGGAGAAAATTAGTAGATTTCAGAGAACTTAATAAGAGAACTCAAGACTTCTGGGAAGTCCAGTTAGGAATACCACATCCCTCAGGGTTAAAAAAGAAAAAATCAGTAACAGTACTGGATGTGGGTGATGCATATTTTTCAGTTCCCTTAGATGAAGCATTCAGAAAGTACACTGCATTCACTATACCTAGTTTAAACAATGAGACACCAGGGATTAGATATCAGTATAATGTGCTTCCACAGGGATGGAAAGGATCACCAGCAATATTCCAAAGTAGCATGACAAAAATCTTAGAGCCTTTTAGAAAACAAAATCCAGACATAGTCATCTATCAATACATGGATGATTTGTATGTAGGATCTGACTTAGAAATAGAGCAGCATAGAACAAAAATAGAAAAACTGAGACAACATCTGTTGAGGTGGGGATTTACCACACCAGACAAAAAACATCAGAAAGAACCCCCATTCCTTTGGATGGGTTATGAACTCCATCCTGATAAATGGACAGTACAGCCTATAGAACTGCCAGACAAAGACAGCTGGACTGTCAATGACATACAGAAGTTAGTGGGAAAATTAAATTGGGCAAGTCAGATTTACCCAGGGATTAAAGTAAAGCAATTATGTAAACTCCTTAGGGGAGCCAAGGCGCTAACAGAAGTAATACAATTAACAAAAGAAGCAGAATTAGAACTGGCAGAAAACAGGGAAATTATAAAAGAACCAGTACATGGAGTGTATTATGATCCATCAAAAGAATTAATAGCAGAAATACAGAAGCAGGGGCAAGGCCAATGGACATATCAAATTTATCAAGAGCCATTTAAAAATCTAAAAACAGGAAAGTATGCAAGAATGAGGGGTGCCCACACTAATGATGTCAAACAATTAACAGAGGCAGTGCAGAAAATAACCACAGAAAGCATAGTAATATGGGGAAAGATTCCTAAATTTAGACTACCCATACAAAAAGAAACATGGGAAACATGGTGGACAGAATATTGGCAAGCCACCTGGATTCCTGAGTGGGAGTTTGTCAATACCCCTCCCTTAGTAAAATTATGGTACCAGTTAGAGAAAGAACCCATACCAGGAGCAGAAACTTACTATGTAGATGGGGCAGCTAACAGAGAGACTAGATTAGGAAAAGCAGGATATGTTACTAACAAAGGGAGGCAAAAAGTTGTCTCCCTAACTGACACAACAAATCAGAAGACTGAGTTACAAGCAATTTATCTAGCTTTACAGGATTCAGGATTAGAAGTAAACATAGTAACAGACTCACAATATGCATTGGGAATCATTCAAGCACAACCAGATAAAAGTGAATCAGAATTAGTCAGTCAAATAATAGAGCAGTTAATAAAAAAGGAAAAGGTCTACCTGGCATGGGTACCAGCGCATAAAGGAATAGGAGGAAATGAACAAGTAGACAAATTAGTCAGTGCTGGAATCAGGAAAGTACTATTTTTAGATGGAATAGATAAAGCCCAAGAAGAACATGAAAAATATCACAGTAATTGGAGAGCAATGGCTAGTGATTTTAACCTGCCACCGGTGGTAGCAAAAGAAATAGTAGCCTGCTGTGATAAATGTCAACTAAAAGGAGAAGCCATACATGGACAAGTAGACTGTAGTCCAGGAATATGGCAACTAGATTGCACACATTTAGAAGGAAAAGTTATCCTGGTAGCAGTCCATGTAGCCAGTGGGTATATAGAAGCAGAAGTTATCCCAGCAGAGACAGGGCAGGAAACAGCATACTTTCTCCTAAAACTAGCAGGAAGATGGCCAGTAAAAACAATACATACAGACAATGGTAGCAATTTCACCAGTGCTACAGTTAAGGCCGCCTGTTGGTGGGCGGGGATCAAGCAGGAATTTGGCATTCCCTACAATCCCCAAAGTCAAGGAGTAGTAGAATCTATGAATAAAGAATTAAAGAAAATTATAGGACAGGTAAGAGATCAGGCTGAACATCTTAAGACAGCAGTACAAATGGCAGTATTCATCCACAATTTTAAAAGAAAAGGGGGGATTGGGGGGTACAGTGCAGGGGAAAGAATAGTAGACATAATAGCAACAGACATACAAACTAAAGAACTACAAAAACATATTACAAAAATTCAAAATTTTCGGGTTTATTACAGGGACAGCAGAGATCCACTTTGGAAAGGACCAGCAAAGCTTCTCTGGAAAGGTGAAGGAGCAGTAGTAATACAAGATAATAGTGACATAAAAGTAGTGCCAAGAAGAAAAGCAAAGATTATTAGGGATTATGGAAAACAGATGGCAGGTGATGATTGTGTGGCAAGCAGACAGGATGAGGATTAGAACATGGATAAGTTTAGTAAAACACCATATATATATTTCAAAGAAAGCTAGGGGATGGGTGTATAGACATCACTATGAAAGCACTAATCCAAGAGTAAGCTCAGAAGTACAAATCCCACTAGGGGACGCGAGATTGACAATAACAACATATTGGGGACTACATACAGGAGAAAGAGACTGGCACTTGGGTCAAGGAGTCTCCATAGAATGGAGGAGAGGGAGATATAGCACACAAGTAGACCCTAACCTAGCAGACCAACTAATTCATATGCACTACTTTGATTGTTTTTCAGAATCTGCTATAAGAAAGGCCTTATTAGGACATAGAGTTAGTCCTAGGTGTGAATATCAAGCAGGACATAACAAGGTAGGATCTCTACAGTACTTGGCATTAGCAGCATTAATAAAGCCAAAAAAGATAAAGCCACCTTTGCCTAGTGTTACGAAACTGACAGAGGATAGATGGAACAAGCCCCAGAAGACCAAGGGCCACAGAGGGAGCCATACAATGAATGGACACTAGAGCTTTTAGAGGAGCTTAAGAGTGAAGCTGTTAGACATTTTCCTAGGCTATGGCTCCATAGCTTAGGGCAATATATCTATGAAACTTATGGAGATACCTGGGCAGGAGTGGAAGCCTTAGTAAGAATGCTGCAACAACTGCTGTTTATTCATTTCAGAATTGGGTGTCAACATAGCAGAATAGGCATTACTCCACGGAGGAGAGCAAGAAATGGAGCCAGTAGATCCTAGATTAGAGCCCTGGAATCACCCAGGAAGTCAGCCTAAGACTCCTTGTACCGCTTGCTATTGCAAAAAGTGTTGCTTTCACTGTCAAGTGTGTTTTACAACAAAAGGCTTAGGCATCTCCTATGGCAGGAAGAAGCGGAGACAGCGACGAAGACCTCCTCAAGGCAGTCAGACTCATCAAGTTCCTCTATCAAAGTAGTAAGTAGTACATGTAATGCAACCTCTACACTTAGCAGCAATAATAGCATTAGTAGTAGCAGCAATAATAGCAATAGTTGTGTGGACCATAGTAGGCTTAGAATATAGGAGAATATTAAGACAAAGAAAAATAGATAGGTTAATTGATAGAATAAGTGAAAGAGCAGAAGACAGTGGCAATGAGAGTGATGAAGACCAGGAGGAATTGGCAGCACTTATGGAAATGGGGCGTCTTGCTCCTTGGGATGTTAATGATCTGTAAGGCTACACAGAATATGTGGGTTACAATCTATTATGGGGTACCTGTGTGGAAAGACGCAAACACCACTCTATTTTGTGCATCAGATGCTAAAGCATATGATGAAGAAGTACATAATGTTTGGGCCACACATGCCTGTGTACCCACAGATCCCAACCCACAAGAAATAAAATTGGAAAATGTAACAGAAAATTTTAACATGTGGAAAAATAACATGGTAGAACAGATGCATGAGGATGTAATTAGTTTATGGGATCAAAGCCTAAAGCCATGTGTAAAGTTAACCCCACTATGTGTTACTTTAAATTGCAGTGATTGGAATGGTACTAGTACCAATAGTAGTATGAATAGTATTAATACCAAGAATAATAGTAGTGAGGGAATGCTGGAGGGAGAAAAAATGAAAAATTGCTCTTTTAATGTCACCACTGTCATAAGAGATAAAGTGACGAAAGAACATGCACTTTTTTATAGACTTGATGTAGTACCAATAGGAAACAGTAATACTAGTTATAGGTTGATAAATTGTAACACCTCAACCATTACCCAGGCCTGTCCAAAGGTATCCTTTGAGCCAATTCCCATACATTATTGTGCCCCGGCTGGTTTTGCGATTCTAAAGTGTAATAATAAGAAATTCAATGGAACAGGACCATGTAATAATGTCAGCTCAGTACAATGCACACATGGAATTAAGCCAGTAGTATCAACTCAATTGCTGTTAAATGGCAGTTTAGCAGAAGAAGAGATAGTAATCAGATCCGCCAATTTCTCGAACAATGCAAAAACCATAATAGTACAGTTTAATAGATCTGTAGCAATTAACTGTACAAGACCCACCAACATTACAAGAAGAAGTATGCGTATAGGACCAGGACGAGTATTTTATGCAACAGGTACCGTACTAGGAGATATAAGAAAGGCATATTGTACCATTAATGGAACACTGTGGAATAAAACTTTAGAAGGAGTAGCTAAAGAGTTAAGAGACCAATTTGGAGAAAATAAAACAATAGTCTTTAATCAATCCTCAGGAGGGGATCCAGAAATTGTAACGCACAGTTTTAATTGTGGAGGGGAATTTTTCTACTGTAATACAACACAACTGTTTAATAGTAGTTGGCAGTTTAATAGTACTTGGAATGATACTCAAATGTTAGATAATATCACACTCACACTCCCATGCAGAATAAAACAAATCATAAACATGTGGCAAGAAGTAGGAAAAGCAATGTATGCCCCTCCCATTGCAGGAAAAATTAGCTGTTCATCAAATATTACAGGGATACTATTAACAAGGGATGGTGGTAACGAGAACCAGACCACCCCCGAGGTCTTCAGACCTGCAGGAGGAGATATGAGGGACAATTGGAGAAGTGAATTATATAAATATAAAGTAGTAAGAGTTGAGCCATTAGGAATAGCACCCACCAAGGCAAAGAGAAGAGTGGTGCAGAGAGAAAAAAGAGCAATAGGAATGGGAGCTGTGTTCCTTGGGTTCTTGGGAGCAGCAGGAAGCACTATGGGCGCAGCGTCAATAACGCTGACGGTACAGGCCAGACAATTATTGTCTGGTATAGTGCAACAGCAAAGTAATTTGCTGAGAGCTGTTGAGGCGCAACAACATCTGTTGCAACTCACAGTCTGGGGCATCAAACAGCTCCAGGCAAGAGTCCTGGCTGTGGAAAGATACCTAAGGGATCAACAGCTCCTAGGGCTTTGGGGTTGCTCTGGAAAACTCATCTGCACCACTACTGTACCTTGGAATACTACCTGGAGCAATAGATCTCTGGATCATATTTGGCAAAACATGACATGGATGCAGTGGGAAAGAGAAATTGATAATTACACAGGATTAATATACACCTTACTTGAGGAATCGCAAAACCAACAAGAAAAGAATGAACAAGAATTATTGGCATTAGATGAATGGGCAAGTTTGTGGAATTGGTTTGACATATCAAAGTGGTTGTGGTACATAAAAATATTCATAATGATAGTAGGAGGCTTGGTAGGTTTAAGAATAATTTTTACTGTACTTTCTATAGTGAATAGAGTTAGGAAGGGATACTCACCATTATCGTTCCAGACCCGCCCCCCAGCACCGAGGGGACCAGACAGGCCCGAAGGAATAGAAGAAGAAGGTGGAGAGAGAGACAGAGACACATCAGGACTACTAGTCAATGGATTCTTAGCAATTATCTGGATCGACCTGCGGAGCCTGTGCCTCTGGAGCTACCGCCACTTGAGAGACTTACTCTTGATTGTAACGAGGATTGTGGAACTTCTGGGACGGAGGGCGTGGGAAGCTCTCAAATACGGGTGGAATCTCCTACAGTATTGGGGTCAGGAACTAAAGAATAGTGCTGTTAGCTTGCTCAATGCCACAGCCATAGCAGTAGCTGAGGGGACAGATAGGATTATAGAAGCAATACAAAGAACTTTTAGAGCTATCCTCAATATACCTAGGAGAGTAAGACAGGGCTTGGAAAGGGCTTTGCTATAAGATGGGTGGTAAGTGGTCAAAAAGTAGTGTGGTTGGATGGCCTGCTATAAGGGAAAGAATGAGAAAAACTGAGCCAGCAGCCGATGGGGTGGGAGCAGCATCTCGAGACCTGGACAAACGTGGAGCAATAACAAGTAGTAATACAGCAGCTACCAATGCTGATTGTGCCTGGCTAGAAGCACAAGAAGAGCA
>B.US.90.US1_AY173952_G.CM.96.96CMABB55_AY772535
GGACCTGAAAGCGAAAGAGAAACCAGAGGAGATCTCTCGACGCAGGACTCGGCTTGCTGAAGCGCGCGGCAAGAGGCGAGGGGCGGCGACTGGTGAGTACGCCAAAAATTTTGACTAGCGGAGGCTAGAAGGAGAGAGATGGGTGCGAGAGCGTCAGTATTAAGCGGGGGAGAATTAGATAAATGGGAAAAAATTCGGTTAAGGCCAGGGGGAAAGAAACAATATAAATTAAAACATATAGTATGGGCAAGCAGGGAGCTAGAACGATTCGCAGTTAACCCTGGCCTGTTAGAAACATCAGATGGCTGTAGACAAATACTGGGACAGCTACAACCAGCCCTTCAGACAGGATCAGAAGAGCTTAAATCATTATATAATACAGTAGCAACCCTCTATTGTGTACATCAAAGGATAGACGTAAGAGACACCAAGGAAGCTTTAGACAAGATAGAGGAAGAGCAAAACAAAAGTAAGAAAAAAGCACAGCAAGCAGCAGCTGACACAAACAGCAGCCAGGTCAGCCAAAATTACCCTATAGTGCAGAACCTCCAGGGGCAAATGGTACATCAGGCCATATCACCTAGAACTTTAAATGCATGGGTAAAAGTAGTAGAAGAGAAGGCCTTCAGCCCAGAAGTAATACCCATGTTTTCAGCATTATCAGAAGGAGCCACCCCACAAGATTTAAACACCATGTTAAACACAGTGGGGGGACATCAAGCAGCCATGCAAATGTTAAAAGAGACCATCAATGAGGAAGCTGCAGAATGGGATAGATTGCATCCAGTACATGCAGGGCCTATTGCACCAGGCCAGATGAGAGAACCAAGGGGAAGTGACATAGCAGGAACCACTAGTACCCTTCAGGAACAAATAGGATGGATGACAAATAATCCACCTATCCCAGTAGGAGAAATCTATAAAAGATGGATAATCCTGGGATTAAATAAAATAGTAAGAATGTATAGTCCTACCAGCATTCTGGACATAAGACAAGGACCAAAGGAACCCTTTAGAGACTATGTAGACCGGTTCTATAAAACTCTAAGAGCCGAGCAAGCTTCACAGGAAGTAAAAAATTGGATGACAGAAACCTTGTTGGTCCAAAATGCGAACCCAGATTGTAAGACTATCTTAAGAGCATTAGGACCAGGAGCTACACTAGAAGAGATGATGACGGCATGTCAGGGAGTGGGAGGACCCGGCCATAAAGCAAGAGTTTTAGCCGAGGCAATGAGCCAGGTATCAGGTGCATCAACAGCCATAATGATGCAGAGAGGCAACTTTAAGGGCCAGAAAAGAACGATCAAGTGTTTTAATTGTGGTAAAGAAGGGCACATAGCCAGAAATTGCAGGGCCCCTAGGAAAAAGGGCTGTTGGAAATGTGGAAAGGAAGGACACCAAATGAAAGATTGTACTGAGAGACAGGCTAATTTTTTAGGGAAAATCTGGCCTTCCCACAAGGGAAGGCCAGGGAATTTTCTTCAGAGCAGACCAGAGCCAACAGCCCCACCAGAAGAGAGCTTCAGATTTGGGGAAGAGACAACAACTCCCTCTCAGAAGCAGGAGACGATAGACAAAGAAATGTATCCTTTAGCTTCCCTCAGATCACTCTTTGGCAACGACCCCTCGTCTCAATAAAGATAGGGGGGCAACTAAAGGAAGCTCTATTAGATACAGGAGCAGATGATACAGTATTAGAAGAAATGAATTTGCCAGGAAGATGGAAACCAAAAATGATAGGGGGAATTGGAGGTTTTATCAAAGTAAGACAGTATGATCAGATACCCATAGAAATCTGTGGACACAAAGCAATAGGTACAGTATTAGTAGGACCTACACCTGTCAACATAATTGGAAGAAATCTGTTGACTCAGATTGGTTGCACTTTAAATTTTCCCATTAGTCCTATTGAAACTGTACCAGTAAAATTAAAGCCAGGAATGGATGGCCCAAAAGTTAAACAATGGCCATTGACAGAAGAAAAAATAAAAGCATTAGTAGAAATTTGTACAGAAATGGAAAAGGAAGGGAAAATTTCAAAAATTGGGCCTGAAAATCCATACAATACTCCAGTATTTGCCATAAAGAAAAAAGACAGTACTAAATGGAGAAAATTAGTAGATTTCAGAGAACTTAATAAGAAAACTCAAGACTTCTGGGAAGTTCAATTAGGAATACCACATCCCGCAGGGTTAAAAAAGAAAAAATCAGTAACCGTACTGGATGTGGGTGATGCATATTTTTCAGTTCCCTTAGATGAAGACTTCAGAAAGTATACTGCCTTCACCATACCTAGTATAAACAATGAGACACCAGGAATTAGATACCAGTACAATGTACTTCCACAAGGATGGAAAGGATCACCAGCTATATTCCAATGTAGCATGACAAAAATCTTAGAGCCTTTTAGAAAACAAAATCCAGACCTAGTTATCTATCAATACATGGATGATTTGTATGTAGGATCTGACTTAGAAATAGGGCAACATAGAATAAAAATAGAGGAACTGAGACAACATCTGTTAAGGTGGGGATTTACCACACCAGACAAAAAACATCAGAAAGAACCTCCATTCCTTTGGATGGGTTATGAACTCCATCCTGATAAATGGACAGTACAGCCTATAGTGCTGCCAGAAAAGGACAGCTGGACTGTCAATGACATACAGAAGTTAGTGGGAAAGTTGAATTGGGCAAGTCAGATTTACCCAGGGATTAAAGTAAGACAATTATGTAAACTCCTTAGGGGAACCAAAGCATTGACAGAAGTAATACCTCTAACAGCAGAAGCAGAGCTAGAACTGGCAGAAAACAGGGAGATTCTAAAAGAACCAGTACATGGAGTGTATTATGACCCATCAAAAGATTTAATAGCAGAAATACAGAAACAGGGGCAGGGCCAATGGACATATCAAATCTATCAAGAACCATTTAAAAATCTTAAAACAGGAAAATATGCAAGAGTGAGGGGTGCCCACACTAATGATGTAAAGCAATTAACAGAGGCAGTGCAAAAAATAGCCACAGAAAGCATAGTAATATGGGGAAAGACTCCTAAATTTAAATTACCCATACAAAAAGAAACATGGGAAACATGGTGGACAGAGTATTGGCAAGCCACCTGGATTCCTGAGTGGGAGTTTGTCAACACCCCTCCCTTAGTAAAATTATGGTACCAGTTAGAGAAAGAACCCATAGTAGGAGCAGAAACTTTCTATGTAGATGGGGCAGCTAACAGGGAGACTAAATTAGGAAAAGCAGGATATGTTACTAACAAAGGAAGACAAAAAGTTGTCTCCATAACTGACACAACAAATCAGAAGACCGAATTACAAGCAATTTATCTAGCTTTGCAGGATTCAGGATCAGAAGTAAACATAGTGACAGACTCACAATATGCATTAGGAATCATTCAAGCACAACCAGATAAAAGTGAATCAGAGTTAGTCAGTCAAATAATAGAGCAGCTAATAAAAAAGGAAAAGGTCTACCTGGCATGGGTACCAGCACACAAAGGAATTGGAGGAAATGAACAAGTAGATAAATTAGTCAGTGCTGGAATCAGGAAAATACTATTTTTAGATGGAATAGATAAGGCCCAAGAAGAACATGAGAAATATCACAATAATTGGAGAGCAATGGCTAGTGATTTTAACCTGCCACCTGTAGTAGCAAAAGAAATAGTAGCCAGCTGTGATAAATGCCAGCTAAAAGGAGAAGCCATGCATGGACAAGTAGACTGTAGTCCAGGCATATGGCAACTAGATTGTACACATTTAGAAGGAAAAGTTATCCTGGTAGCAGTTCATGTAGCCAGTGGATATGTAGAAGCAGAAGTTATTCCAGCAGAGACAGGGCAGGAAACAGCATACTTTCTCTTAAAATTAGCAGGAAGATGGCCAGTAAAAACAATACATACAGACAATGGCAGCAATTTCACCAGTGCTACGGTTAAGGCCGCCTGTTGGTGGGCGGGGATCAAGCAGGAATTTGGCATTCCCTACAATCCCCAAAGTCAAGGAGTAGTAGAATCTATAAATAAAGAATTAAAGAAAATTATAGGACAAGTAAGAGATCAGGCTGAACATCTTAGGACAGCAGTACAAATGGCAGTATTCATCCACAATTTTAAAAGAAAAGGGGGGATTGGGGGGTACAGTGCAGGGGAAAGAATAGTAGACATAATAGCAACAGACATACAAACTAAAGAATTACAAAAACAAATTACAAAAATTCAAAATTTTCGGGTTTATTACAGGGACAGCAGAGATCCGCTTTGGAAGGGACCAGCAAAGCTTCTCTGGAAAGGTGAAGGGGCAGTAGTAATACAAGATAATAGTGACATAAAAGTAGTGCCAAGAAGAAAAGCAAAGATCATTAGGGATTATGGAAAACAGATGGCAGGTGATGATTGTGTGGCAAGTAGACAGGATGAGGATTAACACATGGAAAAGTTTAGTAAAATACCATATGTATAGATCAGGGAAAGCTAGGGGATGGTTTTATAAACATCACTATGAAAGCACTAATCCAAGAATAAGTTCAGAAGTACACATCCCACTAGGGGATGCTAGATTGGTAATAACAACATATTGGGGTCTGCATACAGGAGAAAGAGACTGGCATTTGGGTCAGGGAGTCTCCATAGAATGGAGGAAAAAGAGATATAGCACACAAGTAGACCCTGGCCTAGCAGACCAACTAATTCATCTGCATTATTTTGATTGTTTTTCAGAATCTGCTATAAGAAATGCCATAGTAGGACATATAGTTAGGCCTAGTTGTGAATATCAAGCAGGACATAACAGGGTAAGATCTCTACAGTACTTGGCACTAACAGCATTAATAACACCAAAAAAGAAAAAGCCACCTTTGCCTAGTGTTACAAAATTGACAGAGGATAGATGGAACAAGCCCCAGAAGACCAAGGGCCACAGAGGGAACCATACAATGAATGGACACTAGAGCTTTTAGAGGAGCTTAAAAATGAAGCTGTTAGGCATTTCCCTAGGATATGGCTTCATGGTTTAGGGCAACATATCTATGAAACTTATGGGGATACTTGGGCAGGAGTAGAAGCCATAATAAGAATTCTGCAACAATTGCTGTTTATCCATTTCAGAATTGGGTGCCGACATAGCAGAATAGGCATTACTCCACAGAGGAGAGCAAGAAATGGAGCCAGTAGATCCTAGACTGGAGCCCTGGAAGCATCCAGGAAGCCAGCCTAGGACTGCTTGTACCCCTTGCTATTGTAAAAAGTGCTGCTTTCATTGCCAAGTTTGTTTCACATCAAAAGCATTAGGCATCTCCTATGGCAGGAAGAAGCGGAGACAGCGACGAAGACCTCCTCAAGACAGTCAGACTCATCAAGCTTCTCTATCAGAGCAGTAAGTAGTACATGTAATGCAATCTTTAGAGATATTAGCAATAGTAGCATTAGTAGTAGCAATAATAATAGCAATAGTTGTGTGGTCCATAGTATTCTATTTGTATAAGTCTATATTAAGACAAAGAAAAATAGATAGGTTAATTGATAGAATAATAGAAAGAGCAGAAGACAGTGGCAATGAGAGTGAAGGGGATCAAGAAGACTTATCGGCACTTATGGAGATGGGGTACCATGCTCCTTGGGATATTGATGATCAGTAGTGCTGCAGGACAATTGTGGGTCACAGTCTATTATGGGGTACCTGTGTGGAAAGAAGCAACCACCACTTTATTTTGTGCATCAGATGCCAAAGCTTATGATAAGGAAGTACATAATGTTTGGGCCACACATGCCTGTGTACCCACAGACCCCGACCCAAAAGAATTACCATTGGAAAATGTGACAGAAAATTTTAACATGTGGAAAAATAACATGGTAGAACAGATGCATGAGGATATAATCAGTTTATGGGATCAAAGTCTAAAGCCATGTGTGAAATTGACCCCACTCTGTGTTACTTTAAATTGCACTGACTTCAGTAGGAATGATACTAATACCAATAATAGTAGTGGGGAAAAGATGGAGAAAGGAGAAATAAAAAATTGCTCTTTCAATATCACCACAGAAGTAAGAGATAAGATACAGAAACAATATGCACTTTTTTATAAACTTGATGTAGTACCAATAGAAAATGATAATGATAATACTAGCTATAGGTTGATAAGTTGTAACACCTCAGTCATTACACAAGCCTGTCCAAAGGTAACCTTTGAGCCAATTCCCATACATTATTGTGCTCCGGCTGGTTTTGCGATTCTAAAGTGTAAAGATAAGACGTTCAATGGAACAGGACCATGTACAAATGTCAGCACAGTACAATGTACACATGGAATTAGGCCAGTAGTATCAACTCAACTGCTGTTAAATGGCAGTCTAGCAGAAGAAGAGGTAGTAATTAGGTCTGAAAATTTCACGAACAATGCTAGAACCATAATAGTACAGCTGAGAGAAGCTGTAGAAATTAATTGTACAAGACCCAGCAACAATACAAGAAAAAGTATACATATAGGACCAGGGAGAGCATTTTATACAACAGGAAATATAATAGGAGATATAAGACAAGCACATTGTAACATTAGTAGAGGAAAATGGAATAACACTTTAAAACAGATAGTTAGCAAATTAAGAGAACAATTTGGAAATAAAACAATAGTCTTTAATCAATCCTCAGGAGGGGACCCAGAAATTGTAATGCACAGTTTTAATTGTGGAGGGGAATTTTTCTACTGTAATTCAACACAACTGTTTAATAGTACTTGGGGGGCTAATGATACTTGGACTGAGTCAAATAACAATGAAACAATCACACTCCCATGCAGAATAAAACAAATTATAAACATGTGGCAGGAAGTAGGAAAAGCAATGTATGCCCCTCCCATCGCAGGACAAATTAGATGTTCATCAAATATTACAGGGCTGCTACTAACAAGAGATGGTGGTAATAAAAACGATAGCAACGGGACCGAGATCTTCAGACCTGGAGGAGGAGATATGAGGGACAATTGGAGAAGTGAATTATATAAATATAAAGTAGTAAAAATTGAACCATTAGGAATAGCACCCACCAAGGCAAAGAGAAGAGTGGTGCAGAGAGAAAAAAGAGCAGTAGGCCTAGGAGCTATGTTCCTTGGGTTCTTGGGAGCAGCAGGAAGCACTATGGGCGCAGCGTCAATAACGCTGACGGTACAGGCCAGACAATTATTGTCTGGTATAGTGCAACAGCAGAACAATTTGCTGAGGGCTATTGAGGCGCAACAGCATCTGTTGCAACTCACAGTCTGGGGCATCAAACAGCTCCAGGCAAGAGTCCTGGCTGTGGAAAGATATCTAAAGGATCAACAGCTCCTGGGGATTTGGGGTTGCTCTGGAAAACTCATCTGCACCACTGCTGTGCCTTGGAATACTAGTTGGAGTAATAAATCTCTGGATCAAATTTGGGATAACATGACCTGGATGGAGTGGGAAAGAGAAATTGACAATTACACAAACACAATATACACCTTACTTGAAGAATCGCAGCTCCAACAGGAAAAGAATGAACAAGAATTATTGGAATTGGATAAATGGGCAAGTTTGTGGAGTTGGTTTAGCATAACACACTGGCTGTGGTATATAAAAATATTCATAATGATAGTAGGAGGCTTAATAGGTTTAAGAATAGTTTTTGCTGTACTTTCTATAGTGAAGAGAGTTAGGCAGGGATATTCACCATTGTCGTTTCAGACCCTCCTCCCAGTCCCGAGGGGACCCGACAGGCCCGAAGGAACAGAAGAAGAAGGTGGAGAGAGAGACAGAGACAGATCCATACGTTTAGTGGATGGATTCTTAGCACTTATCTGGGACGATCTGCGGAGCCTGTGCCTCTTCAGCTACCACCGCTTGAGAGACTTACTCTTGATTGTAACGAGGACTGTGGAACTTCTGGGACGCAGGGGGTGGGAAGCCCTCAAATATTGGTGGAATCTCCTACAGTATTGGAGTCAGGAACTAAAGAATAGTGCTGTTAACTTGCTCAACACCACAGCCATCGCAGTAGCTGAGGGGACAGATAGGGTTATAGAAGTATTACAAAGAATTTATAGAGCTTTTTGCAACATACCTAGAAGAATAAGACAGGGCTTGGAAAGGCTTTTGCTATAAGATGGGTGGCAAGTGGTCAAAACTGGGTGGGTGGACTACTGTGAGGGAAAGAATGAGACGAACTGAGCCAACAGCAGAGCCAGCAGTTGGGGTGGGAGCAGTATCTCGGGACCTGGGAAAACATGGAGCAATCACAAGTAGCAATACAGCAGCTACCAATGCTGATTGTGCCTGGCTAGAAGCACAAGAGGAAGAGGAGGTGGGTTTTCCAGTCAAACCTCAGGTACCTTTAAGACCAATGACTTACAAGGCAGCTCTAGATCTTAGCCACTTTTTAAAAGAAAAGGGGGGACTGGAAGGGCTAATTTACTCCCAAAAGAGACAAGAGATCCTTGATTTGTGGATGTACCACACACAAGGCTACTTCCCTGATTGGCAGAACTACACACCAGGGCCAGGGGTCAGATTTCCACTGACCTTTGGATGGTGCTTCAAACTAGTACCAGTTGAGCCAGAGAGGCTAGAGGCCAGTGAAGGAGAGAACAGCACATTGTTACACCCTGCGAGCCTGCATGGGATGGAAGACCCGGAGAGAGAAGTATTAGAGTGGAGGTTTGACAGCAGCCTAGCATTTCATCACAGAGCCCGAGAGCTGTATCCGGAGTACTACAAGGATTGCTGACATTGAACTTTCTACAAGGGACTTTCCGCTGGGGACTTTCCGGGGAGGCGTGGCCTGGGCGGGACTGGGGAGTGGCGAGCCCTCAGATGCTGCATATAAGCAGCTGCTTTTTGCCTGTACTGGGTCTCTCTGGTTAGACCAGATTTGAGCCTGGGAGCTCTCTGGCTAACTAGGGAACCCACTGCTTAAGCCTCAATAAAGCTTGCCTTGAGTGCTTCAAGTAGTGTGTGCCCGTCTGTTGTGT
>B.TH.96.96TH_NP1538_AY713408_H.BE.93.VI991_AF190127
GCGAGAGCGTCAGTACTAAGCGGGGGAGAATTAGATAGATGGGAAAAAATTCGGTTACGGCCAGGGGGAAAGAAAAAATATAGGTTAAAACATGTAGTATGGGCAAGCAGGGAACTAGAACGATTCGCAGTTAACCCTGGCCTGTTAGAAACATCAGGAGGCTGTAGACAAATACTGGAACAGCTACAACCAGCCCTTCAGACAGGATCAGAAGAACTTAGATCAGTATACAATACAGTAGCAACCCTCTATTGTGTGCATGAAAAGATAGAGATAAAAGACACCAAGGAAGCTTTAGAAAAGATAGAGGAAGAGCAAAACAAAAGTAAGAAAAAGGCACAGCAAACAGCAGCTGACACAGGAAACAACAGCCAGGTCAGCCACAATTACCCTATAGTGCAAAACCTCCAGGGGCAAATGGTACATCAGGCCCTATCACCTAGAACTTTAAATGCATGGGTAAAAGTAGTAGAAGAAAAGGCTTTTAGTCCAGAAGTAATACCCATGTTTTCAGCATTATCAGAAGGAGCCACCCCACAAGATTTAAACACCATGCTAAACACAGTGGGGGGACATCAAGCAGCTATGCAAATGTTAAAAGAAACCATCAATGAGGAAGCTGCAGAATGGGATAGATTGCATCCAGTGCATGCAGGGCCAGTTGCACCAGGCCAGCTGAGAGAACCAAGGGGAAGTGACATAGCAGGAACTACTAGTACTCTTCAGGAGCAAATAGGATGGATGACAAATAATCCACCTATCCCAGTAGGGGAAATCTATAAAAGATGGATAATCCTGGGATTAAATAAAATAGTAAGAATGTATAGCCCTGTTAGCATTCTGGACATAAGACAAGGACCAAAGGAACCCTTTAGAGACTATGTAGACCGGTTCTATAAAACTCTAAGAGCCGAGCAAGCTTCACAAGATGTAAAAAATTGGATGACAGAAACCTTGTTGGTCCAAAATGCGAACCCAGATTGTAAGACTATTTTAAAAGCATTGGGACCAGCAGCTACATTAGAAGAAATGATGACAGCATGTCAGGGAGTAGGGGGACCCAGCCATAAAGCCAGAATTTTGGCTGAAGCAATGAGCCAAGTAACAAATCCAACTACCATAATGATGCAGAGAGGCAATTTTAGGAACCAAAGAAAGCCTGTCAAGTGTTTCAATTGTGGCAAAGAAGGGCACATAGCCAGAAATTGCAAGGCCCCTAGAAAAAAGGGCTGTTGGAAATGTGGAAAGGAAGGACACCAACTGAAAGATTGTACGGAGAGACAGGCTAATTTTTTAGGGAAGATCTGGCCTTCCCACAAGGGAAGGCCAGGGAATTTTCTTCAGAACAGACCAGAGCCAACAGCCCCACCAGAGGAGAGCTTCAGGTTTGGGGAAGAGACAACGACTCCATCTCAGAAGCAGGAGCCGATAGACAAGGAACTATATCCTTCAGCTTCCCTCAAATCACTCTTTGGCAGCGACCCCTAGTCACAATAAAGATAGGGGGGCAATTAAAGGAAGCTCTATTAGATACAGGAGCAGATGATACAGTATTAGAAGACATGAATTTGCCAGGAAGATGAAAACCAAAAATGATAGGGGGAATTGGAGGTTTTATCAAAGTAAGACAGTATGATCAGGTACCCATAGAAATCTGCGGACACAAAGCTATAGGTACAGTATTAGTAGGACCTACACCTGTCAACATAATTGGAAGAAATCTGTTGACTCAGCTTGGTTGCACTTTAAATTTTCCCATTAGTCCTATTGAAACTGTACCAGTAAAATTAAAGCCAGGAATGGATGGCCCAAAAGTTAAACAATGGCCATTGACAGAAGAAAAAATAAAAGCATTAGTAGAAATTTGTACAGAAATGGAAAAAGAAGGGAAAATTTCAAAAATCGGGCCTGAAAATCCATACAATACTCCAGTATTTGCCATAAAGAAAAAAGACAGTACTAAATGGAGAAAATTAGTAGATTTTAGAGAACTTAATAAAAGAACTCAAGACTTCTGGGAAGTTCAATTAGGAATACCACATCCTGCAGGGTTAAAAAAGAAAAAATCCGTAACAGTCCTGGATGTGGGTGATGCATATTTCTCAGTTCCTTTAGATAAAGACTTCAGGAAGTATACTGCATTTACCATACCTAGTGTAAACAATGAGACACCAGGGATTAGATATCAGTACAATGTGCTTCCACAGGGATGGAAAGGATCACCAGCAATATTCCAATGTAGCATGACAAAAATCTTAGAGCCTTTTAGAAAACAAAATCCAGACATAGTTATCTATCAATACATGGATGATTTGTATGTAGGATCTGACTTAGAAATAGGGGAGCATAGAACAAAAATAGAGGAACTGAGAAAACATCTGTTGAAGTGGGGGTTTACCACACCAGACAAAAAACATCAGAAAGAACCTCCATTCCTTTGGATGGGTTATGAACTCCATCCTGATAAATGGACAGTACAGCCTATAATGCTGCCAGTAAAAGACAGCTGGACTGTCAATGACATACAGAAGTTAGTGGGAAAGTTAAATTGGGCAAGTCAGATTTATGCAGGGATTAAGGTAAGGGAATTATGTAAACTCCTTAGGGGAGCCAAAGCACTAACAGAAGTAATACCACTAACAAAAGAAGCAGAGCTAGAACTGGCAGAAAACAGGGAAATTCTGAAAGTACCAGTACATGGGGTGTATTATGACCCATCAAAAGATTTAATAGCAGAACTACAGAAGCAGGGGCTAGGTCAATGGACATACCAAATTTATCAAGAACCATGTAAAAATCTGAAAACAGGAAAGTATGCAAAAATGAGGGGTGCCCACACTAATGATGTAAAACAATTAGCAGAAGCAGTGCAAAAAATAGCCACAGAAAGCATAGTAATATGGGGGAAGACTCCTAAATTTAAACTACCCATACAAAAGGAAACATGGGAAGCATGGTGGACAGAGTATTGGCAAGCCACCTGGATTCCTGAGTGGGAGTTTGTCAATACCCCTCCCTTAGTGAAATTATGGTACCAGTTAGAGAAAGAACCCATAGAAGGAGCAGAAACTTTCTATGTAGATGGGGCAGCTAATAGGGAGACTAAATTAGGAAAAGCAGGATATGTTACTAACAAAGGAAGACAAAAAGTTGTCACCCTAACTGACACAACAAATCAGAAGACTGAGTTACAAGCAATTCATTTAGCTTTGCAGGATTCGGGATTAGAAGTAAACATAGTAACAGACTCACAATATGCATTGGGAATCATTCAAGCACAACCAGATAAGAGTGAATCAGAGTTAGTCAGTCAAATAATAGAGCAGTTAATAAAAAAGGAAAAGGTCTACCTGGCATGGGTGCCAGCACACAAAGGAATTGGAGGGAATGAACAAGTAGATAAATTAGTTAGTGCTGGAATCAGGAAAGTACTATTTTTAGATGGAATAGATAAGGCCCAAGAAGAACATGAGAAATATCACAGTAACTGGAGAGCAATGGCTAGTGATTTTAACCTACCACCTGTAGTAGCAAAAGAAATAGTAGCCAGCTGTGATAAATGTCAGCTAAAAGGAGAAGCTATGCATGGACAAGTAGACTGTAGCCCAGGAATATGGCAACTAGATTGTACACATTTAGAAGAAAAAATTATCCTGGTAGCAGTCCATGTAGCCAGTGGATATATAGAAGCAGAAGTTATTCCAGCAGAGACAGGGCAGGAAACAGCATACTTTCTCCTAAAATTAGCAGGAAGATGGCCAGTGAAAACAATACATACAGACAATGGCAGAAATTTCACCAGTAATGCGGTTAAGGCCGCCTGTTGGTGGGCGGGGATCAAGCAGGAATTTGGCATTCCCTACAATCCCCAAAGTCAAGGAGTAGTAGAATCTATGAATAAAGAATTAAAGAAAATTATAGGACAGGTAAGAGATCAAGCTGAACATCTTAAAACTGCAGTACAAATGGCAGTATTCATACACAATTTTAAAAGAAAAGGGGGGATTGGGGGGTACAGTGCAGGGGAAAGAATAGTAGACATAATAGCAACAGACATACAAACTAGAGAATTACAAAAACAAATTACAAAAATTCAAAATTTTCGGGTTTATTACAGGGACAGCAGAGATCCACTTTGGAAAGGACCAGCAAAGCTCCTTTGGAAAGGTGAAGGGGCAGTAGTAATACAAGATAATAGTGACATAAAAGTAGTGCCAAGAAGAAAAGCAAAGATCATTAGGGACTATGGAAAACAGATGGCAGGTGATGATTGTGTGGCAAGTAGACAGGATGAGGATTAACACATGGAAAAGTTTAGTAAAACACCATATGTATATTTCAGGGAAAGCTAAGGGATGGGTTTATAAACATCACTATGATAGCACTCATCCAAAAATAAGTTCGGAAGTACACATCCCACTAGGGGATGCTAGATTGGTAATAACAACATATTGGGGTCTGCATACAGGAGAAAGAGACTGGCATTTGGGCCAGGGAGTCTCCATAGAATGGAGAAAAAAGAGATATAACACACAAGTAGACCCTGGCCTAGCAGATCAACTAATTCATCTGTATTATTTTGATTGTTTTTCAGAATCTGCTATAAGAAATGCTATATTAGGACATAGAGTTAGTCCCATTTGTGACTATCAAGCAGGACATAGAAAGGTAGGATCTTTACAATATTTGGCACTGACAGCATTAATATCACCAAAAAGGACAAAGCCACCTTTGCCTAGTGTTAGAAAACTAGTAGAGGATAGATGGAACAAGCCCCAGAAGACCAGGGGCCACAGAGGGAGCCACACAATGAGTGGACACTAGAGCTTTTGGAGGAACTTAAGAGTGAAGCTGTTAAACATTTTCCTAGGCCATGGCTCCATGGGCTGGACAACATATCTATGACACATATGGAGATACTTGGGCAGGAGTGGAAGCCATAATAAGAATCCTTCAACAACTGCTGTTTATTCATTTCAGAATTGGGTGTCGACATAGCAGAATAGGCATTACTCACCAGAGGAGAGCAAGAAATGGAGCCAGTAGATCCTAGATTAGAGCCTTGGAAGCATCCAGGAAGTCAGCCTAAGACTGCTTGTAACAATTGCTATTGTAAAAAGTGCAGCTTTCATTGCCAAGTTTGTTTCATGAAAAAAGGCTTAGGCATCTTCTATGGCAGGAAGAAGCGAAGACAGAGACGAAGAGCTCCTCAAGACAGTCAGACTCATCAAGTTCCTCTACCAAAGCAGTAAGTAGTAAATGTAATGCAATCTTTAACCATTTTAGCAATAGTAGGCTTAGTAGTAGCAGCAATAATAGCAATAGTTGTGTGGACTATAGTACTCATAGAATATAGGAAAATATTAAGGCAGAGAAAAATAGATAGGCTAATTGATAGAATAAGAGAAAGAGCAGAAGACAGTGGCAATGAGAGTGACGGGGATCAGGAAGAATTATCAGCATTTATGGAGATGGGGCACCATGCTCCTTGGGATGTTGATGATCTGTAGTGCTGCAGAAAACTTGTGGGTCACAGTCTATTATGGGGTACCTGTATGGAAAGAAGCAACCACCACTCTATTTTGTGCATCAGATGCTAAAGCATATGATACAGAGGTACATAATGTTTGGGCCACACATGCCTGTGTACCCACAGACCCCAACCCACAAGAAGTAGTATTGGGAAATGTGACAGAAAATTTTAACATGTGGAAAAATGACATGGTAGAACAGATGCATGAAGATATAATCAGTTTATGGGATCAAAGCCTAAAGCCATGTGTAAAGTTAACCCCACTCTGTGTTACTTTAAGTTGCACTGATTTGAGGAATGCTACTAATACCAGTACAATGGAGGGAGGAGAAATAAAAAACTGCTCTTTCAATATCACCACAAGCATAAAAACTAAGGTGAAAGACTATGCACTTTTGTATAAACATGATGTAGTACAAATAGGTAATGATACCAGCTATAGGTTGACAAAGTGTAACACCTCAGTCATTACACAAGCTTGTCCAAAGGTATCCTTTGAGCCAATTCCCATACATTATTGTACTCCGGCTGGTTTTGCGATTCTAAAGTGTAACAATAAAAAGTTCAATGGAACAGGACCATGTAAAAATGTCAGTACAGTACAATGTACACATGGAATTAGGCCAGTAGTATCAACTCAACTGCTGTTAAATGGCAGTTTAGCAGAAGAAGAGGTAGTAATTAGATCTAGCAATTTCACGAACAATGCTAAAGTCATAATAGTACAGCTAAATGAATCTGTAGAAATTAATTGTACAAGACCCAACAACAATACAAGAAAAAGTATACAGCTAGGACCAGGGAGAGCATGGTATACAACAGGGCAAATAATAGGAGATATAAGACAAGCACATTGTAACCTTAGTAGCACAAAATGGAAAAACACTTTAAAACAGATAACTGAAAAATTAAGAGAACAATTTAGGAATAAAACAATAGTCTTCAAGCAATCCTCAGGAGGGGACCCAGAGGTTGAAATGCACAGTTTTAATTGTGGAGGGGAATTTTTCTACTGTAATACAACACAACTGTTTAATAGTACTTGGAAAAATAATAGTACTTGGAATAATACTACAGGAAATAGCACTATCATGCTCCCTTGCAGAATAAGACAAATTGTAAACATGTGGCAGGAAGTAGGAAAAGCAATGTATGCCCCTCCCATCGGAGGACAAATTAGATGTTCATCAAATATTACAGGGTTGCTATTAACAAGAGATGGTGGTAATGGGAACGAGACCAATGAGAACGAGACCACAGAGACCTTCAGACCTGGAGGAGGAGATATGAGGGACAATTGGAGAAGTGAATTATATAAATATAAAGTAGTAAAAATTGAACCATTAGGAGTAGCACCCACCAAGGCAAAGAGAAGAGTGGTGCAGAGAGAAAAAAGAGCAGTGGGAACGATAGGAGCTATGTTCCTTGGGTTCTTGGGAGCAGCAGGAAGCACTATGGGCGCAGCGTCAATAACGCTGACGGTACAGGCCAGACAATTGTTGTCTGGTATAGTGCAACAGCAGAGAAATTTGCTGAGGGCTATTGAGGCGCAACAACATATGTTGCAACTCACAGTCTGGGGCATCAAGCAGCTCCAGGCAAGAGTCCTGGCTGTGGAAAGATACCTAAAGGATCAACAGCTCCTAGGGATTTGGGGTTGCTCTGGAAAACTCATTTGCACCACTGCTGTGCCTTGGAATACTAGTTGGAGTAATAAATCTCTGGATAAGATTTGGAATAACATGACTTGGATGGAGTGGGAAAGAGAAATTAACAATTACACAAAAGAAATATACACCTTAATTGAAGAATCGCAGAACCAACAAGAAAAGAATGAACTAGAATTATTGGAATTGGATAAGTGGGCAAGCTTGTGGAATTGGTTTGACATAACAAAATGGCTGTGGTATATAAAAATATTCATAATGATAGTAGGAGGCTTGATAGGTTTAAGAATAGTTTTTGCAGTACTTTCAATAGTAAATAGAGTTAGGCAGGGATACTCACCATTGTCATTACAGACCCGCTTCCCAGCCCAGAGGGGACCCGGCAGGCCCGAAGGAATCGAAGAAGAAGGTGGAGAGAGAGACAGAGACAGATCCGAGAGATTAGTACACGGATTCTTGACACTTATCTGGGAGGATCTACGGAGCCTGTGCCTCTTCAGCTACCACCACTTGAGAGACTTACTCTTGATTGTAGCGAGGATTGTGGAACTTCTGGGACGCAGGGGGTGGGAAGCCCTCAGATATTGGTGGAATCTCCTGCAGTATTGGATTCAGGAACTAAAGAATAGTGCTGTTAGCTTGCTCAATACCACAGCTATAGCAGTAGCTGAGGGGACAGATAGGGTTATAGAAGTAGTACAAAGAGCTTATAGAGCTATTATCCACATACCTACAAGAATAAGACAGGGCTTAGAAAGGGCTTTGCAATAAGATGGGTGGCAAGTGGTCAAAATGTAGTCTGGTTGGATGGCCTAGTGTAAGGGAAAGAATGGTAAGAGCTGAGCCAGCAGCAGATGGGGTGGGAGCAGTATCTCGAGACCTGGAAAAGCATGGGGCAATCACAAGTAGAAATACAGCAGCTACTAATGCTGCTTGTGCCTGGCTAGAAACACAAGAGGAAGA
>B.CO.01.PCM001_AY561236_J.SE.94.SE7022_AF082395
GCGAGAGCGTCAGTATTAAGCGGGGGAGAATTAGATAGATTTGAAAAAATTCGTTTAAGGCCAGGAGGAAAGAAAAAGTATAAATTAAAACATATAGTATGGGCAAGCAGGGAACTAGAAAGATTTGCAGTTAATCCTGGCCTTCTGGAATCATCAGAAGGTTGTAGACAAATACTGGGACAGCTACAACCATCCCTTCAGACAGGATCAGAAGAGCTTAAATCATTATTTAATACAATAGCAGTCCTCTATTGTGTACATCAAAGGATAGAGGTAAAAGACACCAAGGAAGCTCTAGATAGGATAGAGGAAGAGCAAAACAAAAGTAAGAAAAAAGCACAGCAAGCAGCAGCTGACACAGGAAACAGCAGCCAGGTCAGCCAGAATTACCCTATAGTGCAGAACCTCCAGGGGCAAATGGTACATCAGGCCTTATCACCTAGAACTTTAAATGCATGGGTAAAAGTAGTAGAAGAGAAAGCTTTCAGCCCAGAAGTAATACCCATGTTTTCAGCATTGTCAGAAGGAGCCACCCCACAAGATTTAAACACCATGCTAAACACAGTGGGGGGACATCAAGCAGCCATGCAAATGTTAAAAGAGACCATCAATGAGGAAGCTGCAGAATGGGATAGATTGCATCCAGTGCATGCAGGGCCTATTGCACCAGGCCAGATGAGAGAACCAAGGGGAAGTGACATAGCAGGAACTACTAGTACCCTTCAGGAACAAATAGGATGGATGACACATAATCCACCTATCCCAGTAGGAGAGATCTATAAAAGATGGATAATCTTGGGATTAAATAAAATAGTGAGAATGTATAGCCCCACCAGCATTTTGGACATAAGACAAGGACCAAAGGAACCCTTCAGAGACTATGTAGACCGGTTCTATAAAACTCTAAGAGCAGAGCAAGCTTCACAGGAGGTAAAAAATTGGATGACAGAAACCTTGTTGGTCCAAAATGCGAACCCAGATTGTAAAACTATTTTAAAAGCATTAGGACCAGGAGCTACACTAGAAGAAATGATGACAGCATGCCAGGGAGTGGGAGGACCCGGCCATAAAGCAAGAGTTTTGGCTGAAGCAATGAGCCAAGTAACAAATTCAACTGCCATAATGATGCAGAGAGGCAATTATAAGAACCAAAGAAAACCTGTTAAGTGTTTCAATTGTGGCAAAGAGGGGCACATAGCTAAAAATTGCAGGGCCCCTAGAAAGAAGGGTTGTTGGAAATGTGGAAAGGAAGGACACCAAATGAAAGATTGTATCGAGAGACAGGCTAATTTTTTAGGGAAAATCTGGCCTTCCAACAAGGGGAGGCCAGGGAATTTTCCTCAGAACAGACTAGAGCCAACAGCCCCACCAGAAGAGAGCTTCAGGTTTGGGGAGGAGGTGACAACTCCCCTTCAGAAACAGGAGCCAACAGACAAGGAACTGTATCCTTTAACTTCCCTCAAATCACTCTTTGGCAACGACCCCTCGTCACAATAAAGATAGGGGGACAGCTAAAGGAAGCTCTATTAGATACAGGAGCAGATGACACAGTATTAGAAGAAATGAGTTTGCCAGGGAAATGGAGACCAAAAATGATAGGGGGAATTGGAGGGTTTATCAAAGTAAGACAGTATGATCATATACTCGTAGAAATCTGTGGGCATAAAGCTATAGGTACAGTCTTAGTAGGACCTACACCTGTCAACATAATTGGAAGAAATCTGTTGACTCAGATTGGCTGCACTTTAAATTTTCCCATTAGTCCTATTGAAACTGTACCAGTAAAATTAAAGCCAGGAATGGATGGCCCAAAAGTTAAGCAATGGCCATTGACAGAAGAAAAAATAAAAGCATTAGTAGAAATTTGTACAGAAATGGAAAAGGAAGGAAAAATTTCAAAAATTGGGCCTGAAAATCCATACAATACTCCAGTATTTGCCATAAAGAAAAAAGACAGTACTAAATGGAGAAAATTAGTAGATTTCAGAGAACTTAATAAGAGAACTCAAGACTTTTGGGAAGTTCAATTAGGAATACCACATCCCGCAGGGTTAAAAAAGAAAAAATCAGTAACAGTACTGGATGTGGGGGATGCTTATTTTTCAGTTCCCTTAGATGAAGATTTCAGGAAATATACTGCATTTACCATACCTAGCATAAACAATGAGACACCAGGGGTTAGATATCAGTACAATGTGCTTCCACAGGGATGGAAAGGATCACCAGCAATATTCCAATGTAGCATGACAAAAATCTTAGAGCCTTTTAGAAAACAAAATCCAGACATAGTTATCTATCAATACATGGATGATTTGTATGTAGGATCTGACTTAGAAATAGGGCAGCATAGAACAAAAGTAGAAGAACTGAGAGAACATCTGTTGAAGTGGGGATTTGCCACACCAGACAAAAAACACCAGAAAGAACCTCCATTTCTTTGGATGGGTTATGAACTCCATCCTGACAAATGGACAGTACAGCCCATAATACTGCCAGAAAAAGACAGCTGGACTGTCAATGACATACAGAAGTTAGTGGGAAAATTAAATTGGGCAAGTCAAATTTATCCAGGGATTAAGGTAAAGCAATTATGTAAACTCCTTAGGGGAACCAAAGCCCTAACAGAAGTAGTACCCCTATCAGCAGAGGCGGAGCTAGAATTGGCAGAAAACAGGGAGATTCTAAAAGAGCCAGTACATGGAGTGTATTATGACCCATCAAAAGACTTGATAGCAGAACTACAGAAGCAAGGGCAAGGACAATGGTCATATCAAATTTATCAAGAGCCATTTAAAAATCTGAAAACAGGAAAATATGCAAGAATGAGGGGTACCCACACTAATGATGTAAAACAATTAACAGAAGCAGTGCAAAAAATAGCCACAGAAAGCATAGTAATATGGGGAAAGACTCCTAAATTTAAACTACCCATACAAAAAGAAACATGGGAAGCATGGTGGACAGAGTATTGGCAAGCCACCTGGATCCCTGAGTGGGAGTTTGTCAATACCCCTCCCTTAGTAAAATTATGGTACCAGTTAGAAAAAGAACCCATAGTAGGAGCAGAAACCTTCTATGTAGATGGGGCAGCTAATAGGGATACTAAATCAGGAAAAGCAGGATATGTTACTGACAGAGGAAGACAAAAAGTGGTCTCCCTAACTGATACAACAAATCAGAAGACTGAGTTACAGGCAATTCATCTAGCTTTACAGGATTCGGGACTAGAAGTAAACATAGTAACAGACTCACAATATGCATTAGGAATCATTCAAGCACAACCAGATAAGAGTGAATCAGAATTAGTCAGTCAAATAATAGAGCAGTTAATAAAAAAGGAAAAGGTCTATCTGGCATGGGTACCAGCACACAAGGGAATTGGAGGAAATGAACAAGTAGATAAGCTAGTCAGTGCTGGAATCAGGAAAGTACTGTTTTTGGATGGGATAGATAAAGCTCAGGAAGACCATGAGAAATATCACAGTAATTGGAGAGCAATGGCTAGTGATTTTAACCTGCCACCTATAGTAGCAAAAGAAATAGTAGCCAGCTGTGATAAATGTCAACTAAAAGGAGAAGCCATGCATGGACAAGTAGACTGTAGTCCAGGAGTATGGCAACTAGATTGTACACATTTAGAAGGAAAAATTATCCTGGTAGCAGTTCATGTAGCCAGTGGATATATAGAAGCAGAAGTTATTCCAGCAGAGACAGGGCCGGAAACAGCATACTTTATCTTAAAATTAGCAGGAAGATGGCCAGTAAAAACAATACATACAGATAATGGCAGCAATTTCACCAGCACTACAGTTAAGGCCGCCTGTTGGTGGGCAGGGGTCAAGCAAGAATTTGGCATTCCCTACAATCCCCAAAGTCAAGGAGTAGTAGAATCTATGAATAATGAATTAAAGAAAATTATAGGGCAGGTAAGAGATCAGGCTGAACATCTTAAGACAGCAGTACAAATGGCAGTGTTCATTCACAATTTTAAAAGAAAAGGGGGGATTGGGAGGTACAGTGCAGGGGAAAGAATAGTAGACATAATAGCAACAGACATACAAACTAAAGAATTACAAAAACAGATTACAAAAATTCAAAATTTTCGGGTTTATTACAGGGACAGCAGAGATCCACTTTGGAAAGGACCAGCAAAGCTTCTCTGGAAAGGTGAAGGGGCAGTAGTAATACAAGATAATAGTGACATAAAAGTAGTGCCAAGAAGAAAAGCAAAGATCATTAGGGATTATGGAAAACAGATGGCAGGTGATGATTGTGTGGCAAGTAGACAGGATGAGGATTAGAACATGGAAGAGTTTAGTGAAACACCACATGTATATTTCAAAGAAAGCTAAGGGTTGGTTTTATAGACATCACTATGAAAGCACTCATCCAAAAATAAGTTCAGAAGTACACATCCCACTAGGGGAAAATAGATTAGTAGTAACAACATATTGGGGTCTGCATACAGGAGAAAGAGACTGGCATTTGGGTCAGGGAGTCTCCATAGAATGGAGGAAAAGGAGATATAGCACACAAGTAGACCCTGACCTAGCAGACCAACTAATTCATCTGTATTATTTTGATTGTTTTTCAGAATCTGCTATAAGAAATGCCATATTAGGAAACTTAGTTAGGCCTAGGTGTGAATATCAAGCAGGACATAACAAGGTAGAATCTCTACAGTACTTGGCACTAACAGCATTAATCACACCAAAAAAGATAAAGCCACCGTTGCCTAGTGTTAAGAAACTGACAGAGGATAGATGGAACAAGCCCCGGAAGATCAAGGGCCACAGAGGGAGCCATACAATGAATGGACACTAGAGCTTTTGGAGGAGCTTAAGAGAGTAGCTGTTAGACATTTTCCTAGCTCATGGCTACATGGCCTAGGACAACATATCTATGAAACTTATGGGAATACTTGGGCAGGAGTGGAAGTCTTAATAAGAACCCTGCAACAACTGCTGTTTATTCATTTCAGAATCGGGTGCCGACTTAGCAGAATAGGCATCCAACAGAGAGGAGCAAGAAATGGAGCCAGTAGATCCTAGACTAGAGCCCTGGAAACATCCAGGAAGTCAGCCTAAGACTGCTTGTACCAATTGCTATTGTAAAAAGTGCTGCTTTCATTGCCAAGTTTGTTTCACAAAAAAAGGCTTAGGCATCTCCTATGGCAGGAAGAAGCGGAGACAGCGACGAAGATCTCATCCAGACAGTAAGATTCATCAGGCTCCTCTATCAACTCAGTAAGTACTGCCTGTAATGCACGCTTTACAAATATCAGCAATAGTAGCTTTAGTAGTAACAGCAATAATAGCAATAGTTGTGTGGACCATAGTAGGCTTAGAAATTAGGAAGGTATTAAGACAAAGAAAAATAGACAGGTTAATTGAAAGAATAGCAGAAAGAGCAGAAGACAGCGGCAATGAGAGCGAAGGGGATCAGGAAGAATTGGCAGCACTTGTGGAAATGGGGCACGATGCTCCTTGGGATGTTAATGATATGTAGTGCTACAGAACAATTGTGGGTCACAGTCTATTATGGGGTACCTGTATGGAAAGAAGCAAACACTGTTCTATTTTGTGCCTCAGATGCTAAAGCATATGGTACAGAGGTACATAATGCTTGGGCCACACGTGCCTGTGTACCCACAGACCCCAACCCACAAGAAGTAGTATTGGAAAATGTGACAGAAAATTTTAACATGTGGAAAAATGGCATGGTAGACCAGATGCATGAAGATATAATTAGTTTATGGGATGAAAGCCTAAAGCCATGTGTCAAATTAACCCCACTATGTGTCACTTTAAATTGCACGAATGCTAATACCACTAGTAGTGGGAGAGTGATGCCCACAATGAAGCCAGAAGAAATAAAAAACTGCTCTTTCAATGTCACCACAAGCATAGGAAGTAAGGTACAAGAAACTGCACTTTTTTATAGACTTGATGTAGAACCAATAGATAAGAATGATAGCAGATATAGGTTGATACATTGTAACACCTCAGTCATTAAACAGGCCTGTCCAAAGGTATCCTTTGAGCCAATTCCCATACATTATTGTACCCCGGCTGGTTTTGCGATTCTACAGTGTAATGATAAAAAGTTCAATGGAACAGGACCATGTACAAATGTCAGCACAGTACAATGTACACATGGAATTAGGCCAGTAGTGTCAACTCAACTACTGCTAAATGGCAGTCTAGCAGAAGAAGAGATAGTAATTAGATCTGAGAATTTCACGGACAATGCTAAAACCATAATAGTACAGCTAAATGTTTCTGTAGAAATTAATTGTACAAGACCCAACAATAATACAAGAAAAGGTATACATCTAGGACCAGGGAAAGCATTCTATGCATCAGGAGACATAGTAGGAAACATAAGACAAGCACATTGTACACTTAATAGAACAAAATGGGAGAAAACTTTAGGACAGGTAGCTAACAAACTAAGAGAACAATATAAAAATAAAACAATAATCTTTAATCAATCCTCAGGAGGGGACCTAGAAACTGTAATGCATAGTTTTAATTGTGGAGGGGAATTTTTCTACTGTAATACAACACAACTGTTTAATAGTACTTGGAATGAGAATAGTACTTGGAATGGGACTATTACTGAAAATTCAAATAACACTAATATCACACTCCCATGTAAAATAAAGCAAATTATAAATATGTGGCAGAGAGTAGGAAAAGCAATGTATGCCCCTCCCATCAGAGGAGTAATAAGATGTGTATCAAACATCACAGGGCTACTATTAACAAGAGATGGTGGAAACAGGAATGGCAGTGAGAATGGCACTGAGACCTTCAGACCTACAGGAGGAAATATGAAAGATAATTGGAGAAGTGAATTATATAAATATAAAGTAGTAGAGCTTGAGCCACTAGGAGTAGCACCCACCAAGGCAAAAAGAAGAGTGGTGGAGAGAGAAAAAAGAGCAGTGGGAATAGGAGCTGTGTTCCTTGGGTTCTTGGGAGCAGCAGGAAGCACTATGGGCGCAGCGTCAATAACGCTGACGGTACAGGCCAGACAATTATTGTCTGGTATAGTGCAACAGCAGAACAATCTGCTGAGGGCTATTGAGGCGCAACAACATCTGTTGCAACTCACAGTCTGGGGCATTAAGCAGCTCCAGGCAAGAGTCCTGGCTGTAGAAAGATACCTAAAGGATCAACAGCTCCTGGGAATTTGGGGTTGCTCTGGAAAGCTCATTTGCACCACTACTGTGCCTTGGAATGCTAGCTGGAGCAATAAATCTCTAGATATGATTTGGAATAACATGACCTGGATGGACTGGGAAAAAGAAATTGACAATTACACAGGCTTAATATATACCTTAATTGAAGAATCGCAGAACCAACAGGAAAAGAATGAAAAAGAATTATTGGAATTGGACAAGTGGGCAAGTCTGTGGACATGGTTTGACATAACAAACTGGCTGTGGTATATAAGACTATTCATAATAATAGTAGGAAGCTTAGTAGGTTTAAGAATAATTTTTGCTGTACTTTCTATAGTGAATAGAGTTAGGCAGGGCTACTCACCATTATCATTTCAGACCCACCTCCCAGCCGCGAGGGGACCCGACAGGCCCGAAGGAATCGAAGGAGAAGGTGGAGAGAGAGACAGAGACAGATCGGGTCGATTAGTGCATGGATTCTTAGGAGTCATCTGGGACGATCTGCGGAGCCTGTGCCTCTTCAGCTACCACCTCTTGAGAGACTCAATCTTGATTGTAGCGAGGATTGTGGAACTGCTGGGACGCAGGGGGTGGGAAGCCCTCAGGTATTGGTGGAGTCTCCTGCAGTATTGGAGTCAGGAACTGAAGAATAGTGCTGTTAGCTTGCTTAATGTCACAGCTATAGCAGTAGCTGAGGGGACAGATAGGATTATAGAAGGAGTACAAAGAGCTTGTAGAGCTATTCGCAACGTACCTAGAAGAATAAGACAGGGCTTAGAAAGGGCTTTACTATAAAATGGGTGGCAAGTGGTCAAAACGAAAGGCAGCTGAGTGGGCTGATGTAAGGGAAAGAATGGAACGAGCTGAACCAGCAGCAGAAGGGGTGGGAGCAGCATCTCGAGACCTAGAAAAACATGGAGCAATCACAAGTAGCAACACAGCAGCTACTAATGCTGATTGTGCCWGGCTAGAAGCACATGAGGATGAAGAGGTAGGCTTTCCAGTCAGACCTCAGGTCCCTTTAAGACCAATGACTCGCAAGGCAGCTATAGATATGAGCCACTTTTTAAAAGAAAAGGGGGGACTGGAAGGGCTAATTTACTCACAAAAGAGAAAAGATATCCTTGATCTGTGGGTCTACCACACGGAAGGCTACTTCCCTGATTGGCAGTGCTACACACCAGGGCCAGGGGTCAGATATCCACTGACCTTTGGATGGTGCTTCAAGCTAGTACCAGTCGAGCCAGAGGAGGTGGAAAAGGCCAATGAAGGAGAGAACAACAGCTTGTTACACCCTATGAGCCTGCATGGGATGGATGACCCAGAGAAAGAAGTGCTGCAGTGGAAGTTTGACAGCCGCCTCGCATTCCATCACGTAGCCAGAGAGCTGCATCCGGAGTTCTTCAAAGACTGCTGACACCAAGCTTTGTACAAGGGACTTTCCGCTGGGGACTTTCCAGGGGAGGCGTGGACTGGGCGGGACTAGGGAGTGGCGAGCCCTCAGATGCTGCATATAAGCAGCTGCTTTCTGCCTGTACTGGGTCTCTCTGGTTAGACCAGATCAGAGCCTGGGAGCTCTCTGGCTAGCTAGGGAACCCACTGCT
>B.US.89.P896_U39362_K.CM.96.MP535_AJ249239
TGGAAGGGCTAGTTCACTCCCAGAAAAGACAAGATATCCTTGATCTGTGGGTCTACCACACACAAGGCTTCTTCCCAGATTGGCAGAACTACACACCAGGGCCAGGAATCAGATATCCACTGACCTTTGGATGGTGCTACAAGCTAGTACCAGTTGAGCCAGATGAAGGAGAGAACAACAGAGAGGACAACAGCTTGCTACACCCTGCTAACCAGCATGGAGTAGAAGACTCGGAGAGACAAGTGTTAGTGTGGAGGTTTGACAGCCGCCTAGCATTCCATCACGTGGCCCGAGAGCTGCATCCGGAGTACTTCAAGAACTGAACTGCTGACACTGAGCTATCTACAAGGGACTTTCCGCTGGGGACTTTCCAGGGAGGTGTGGCCTGGGCCGAACTGGGGAGTGGCGAGCCCTCAGATGCTGCATATAAGCAGCTGCTTTTTGCCTGTACTGGGTCTCTCTGGTTAGACCAGATCTGAGCCTGGGAGCTCTCTGGCTAGCTAGGGAACCCACTGCTTAAGCCTCAATAAAGCTTGCCTTGAGTGCTTCAAGTAGTGTGTGCCCGTCTGTTGTGTGACTCTGGTAGCTAGAGATCCCTCAGACCATCCTAGTTAGTGTAGAAAATCTCTAGCAGTGGCGCCCGAACAGGGACCGGAAAGCGAAAGAGAAACCAGAGGAGATCTCTCGACGCAGGACTCGGCTTGCTGAAGCGCGCACAGCAAGAGGCGAGGGGCGGCGACTGGTGAGTACGCCAAATTTTTTGACTAGCGGAGGCTAGAAGGAGAGAGATGGGTGCGAGAGCGTCAGTATTAAGCGGGGGAGAATTAGATAGATGGGAGAAAATTCGGTTAAGGCCAGGGGGAAAGAAAAAATATAAACTAAAACATATAGTATGGGCAAGCAGGGAGCTAGAACGATTCGCAGTTAACCCTAGCCTGTTAGAAACATCAGAGGGCTGTAGACAAATACTGGGACAGCTACAATCATCCCTTCAGACAGGATCAGAAGAACTTAAATCATTATATAATACAGTAGCAACCCTCTATTGTGTGCATCAAAGGATAGAGGTAAAAGACACCAAGGAAGCTTTAGATAAGATAGAGGAAGAGCAAAACAAAAGTAAGAAAAAGGCACAGCAAGCAGCAGCTGACACAGGAAATAGCAGCCAGGTCAGCCAAAATTACCCTATAGTGCAGAACATCCAGGGGCAAATGGTACATCAGGCCATCTCACCTAGAACTTTAAATGCATGGGTAAAAGTAGTAGAAGAGAAGGCTTTCAGCCCAGAAGTAATACCCATGTTTTCAGCATTATCAGAAGGAGCCACCCCACAAGATTTAAACACCATGCTAAACACAGTGGGGGGACATCAGGCAGCCATGCAAATGTTAAAAGAGACCATCAATGAGGAAGCTGCAGAATGGGATAGATTGCATCCAGTGCAGGCAGGGCCTGTTGCACCAGGCCAGATGAGAGAACCAAGGGGAAGTGACATAGCAGGAACTACTAGTACCCTTCAGGAACAAATAGGATGGATGACAAATAATCCACCTATCCCAGTAGGAGAAATCTATAAAAGATGGATAATCCTGGGATTAAATAAAATAGTAAGAATGTATAGCCCTTCCAGCATTTTGGACATAAAACAAGGACCAAAGGAACCCTTTAGAGACTATGTAGACCGGTTCTATAAAACTCTAAGAGCCGAGCAAGCTTCACAGGAGGTAAAAAATTGGATGACAGAAACCTTGTTGGTCCAAAATGCAAACCCAGATTGTAAAACTATATTAAAAGCATTGGGACCAGGAGCTACACTAGAAGAAATGATGACAGCATGTCAGGGAGTGGGAGGACCCGGACATAAAGCAAGAGTCTTGGCTGAGGCAATGAGCCAAGTAACAAATTCAGCTACCATAATGATGCAGAGAGGCAATTTTAGAAACCAAAGAAAGACTGTTAAGTGCTTCAATTGTGGCAAAGAAGGGCACATAGCCAAAAATTGCAGGGCCCCTAGGAAAAAGGGCTGTTGGAAATGTGGAAAGGAAGGACACCAAATGAAAGATTGTACTGAGAGACAGGCTAATTTTTTAGGGAAAATCTGGCCTTCCCACAAGGGAAGGCCAGGGAATTTTCTTCAGAGCAGACCAGAGCCAACAGCCCCACCAGAAGAGAGCTTCAGGTTTGGGGAGGAGACAACAACTCCCTCTCAGAAGCAGGAGCCGATAGACAAGGAACTGTATCCCTTAGCTTCCCTCAGATCACTCTTTGGCAACGACCCCTCGTCACAATAAAAGTAGGGGGGCAACTAAAGGAAGCTCTATTAGATACAGGAGCAGATGATACAGTATTAGAAGACATGAGTTTGCCAGGAAGATGGAAACCAAAAATGATAGGGGGAATTGGAGGTTTTATCAAAGTAAGACAGTATGAGCAGATAGACATAGAAATCTGTGGACATAAAGCTAAAGGTACAGTATTAGTAGGACCTACACCTGTCAACATAATTGGAAGAAATCTGTTGACTCAGATTGGTTGCACTTTAAATTTTCCCATTAGTCCTATTGAAACTGTACCAGTAAAATTAAAGCCAGGAATGGATGGTCCAAAAGTGAAACAATGGCCATTGACAGAAGAAAAAATAAAAGCATTAGTAGAAATTTGTACAGAAATGGAAAAGGAAGGAAAAATTTCAAAAATTGGGCCTGAGAATCCATACAATACTCCAGTATTTGCCATAAAGAAAAAAGACAGTACTAAATGGAGAAAATTAGTAGATTTCAGAGAACTTAATAAGAGAACCCAAGACTTCTGGGAAGTTCAATTAGGCATACCACATCCCGCAGGGTTAAAAAAGAAAAAATCAGTAACAGTACTGGATGTGGGTGATGCATATTTTTCAGTTCCCTTAGATGAAGACTTCAGGAAGTACACTGCATTTACCATACCTAGTATAAACAATGAGACACCAGGGATTAGATATCAATACAATGTGCTTCCACAGGGATGGAAAGGATCACCAGCAATATTCCAAAGTAGCATGACAAAAATCTTAGAGCCTTTTAGAAAACAAAATCCAGACATAGTTATCTATCAATACATGGATGACTTGTATGTAGGATCTGACTTAGAAATAGGGCAGCATAGAGCAAAAATAGAGGATCTGAGACAACATCTGTTGAAGTGGGGGTTTACCACACCAGACAAAAAACATCAGAAAGAACCTCCATTTCTTTGGATGGGTTATGAACTCCATCCTGATAAATGGACAGTACAGCCTATAGTGCTGCCAGAAAAAGACAGCTGGACTGTCAATGATATACAGAAGTTAGTGGGGAAATTGAATTGGGCAAGTCAGATTTATGCAGGGATTAAAGTAAAGCAATTATGTAAACTCCTTAGGGGAACCAAAGCACTAACAGAAGTAGTACCACTAACAGAAGAAGCAGAGCTAGAACTGGCAGAAAACAGGGAGATTCTAAAAGAACCAGTACATGGAGTGTATTATGACCCAACAAAAGACTTAATAGCAGAGCTACAGAAGCAGGGGCAGGGCCAATGGACATATCAAATTTATCAGGAGCCATATAAAAATCTGAAAACAGGAAAATATGCAAGAATGAGGGGTGCCCACACTAATGATGTAAAACAATTAACAGAGGCAGTGCAAAAAATAGCCACAGAAAGCATAGTAATATGGGGAAAGACTCCTAAATTTAAACTACCCATTCAAAAGGAAACATGGGAAGCATGGTGGACAGATTATTGGCAAGCCACCTGGATTCCTGAGTGGGAGTTTGTCAATACCCCTCCCTTAGTGAAATTATGGTATCAGTTAGAGAAAGAACCCATAGTAGGAGCAGAAACTTTCTATGTAGATGGAGCAGCTAACAGGGACACCAAATCAGGAAAAGCAGGATATGTTACTGACAGAGGAAGACAAAAAGTTGTCTCCCTAGCTGACACAACAAATCAGAAGACTGAGCTACAAGCAATTCATCTAGCTTTGCAGGATTCGGGATTAGAAGTAAACATAGTGACAGACTCACAATATGCATTAGGGATCATTCAAGCACAGCCAGATAAAAGTGAATCAGAGTTAGTCAGTCAAATAATAGAGCAGTTAATAAAAAAGGAAAAGGTCTACCTGGCATGGGTACCAGCACACAAAGGAATTGGAGGAAATGAACAAGTAGATAAATTAGTCAGTGCTGGAATCAGGAAAGTACTATTTTTAGATGGAATAGATAAGGCCCAAGAAGAACATGAGAAATATCACACTAATTGGAGAGCAATGGCTAGTGATTTTAACCTGCCACCTGTAGTAGCAAAAGAAATAGTAGCCAGCTGTAATAAATGTCAGCTAAAAGGAGAAGCCATGCATGGACAAGTAGACTGTAGTCCAGGAATATGGCAACTAGATTGCACACATTTAGAAGGAAAAGTTATCCTGGTAGCAGTTCATGTAGCCAGTGGATATATAGAAGCAGAAGTTATTCCAGCAGAGACAGGGCAGGAAACAGCATACTTTCTCCTAAAATTAGCAGGCAGATGGCCAGTAAAAACAATACATACAGACAATGGCAGCAATTTCACCAGTACCACAGTTAAGGCCGCCTGTTGGTGGGCAGGGATCAAGCAGGAATTTGGCATTCCCTACAATCCCCAAAGTCAAGGAGTAGTAGAATCTATGAATAAAGAATTAAAGAAAATTATAGGACAGGTAAGAGATCAGGCTGAACATCTTAAGACAGCAGTACAAATGGCAGTATTCATCCACAATTTTAAAAGAAAAGGGGGGATTGGGGGGTACAGTGCAGGGGAAAGAATAGTAGACATAATAGCATCAGACATACAAACTAAAGAACTACAAAAACAAATTACAAAAATTCAAAATTTTCGGGTTTATTACAGGGACAGCAGAGATCCACTTTGGAAAGGACCAGCAAAGCTTCTCTGGAAAGGTGAAGGGGCAGTAGTAATACAGGATAATAGTGACATAAAAGTAGTGCCAAGAAGAAAAGCAAAGATCATTAGGGATTATGGAAAACAGATGGCAGGTGATGATTGTGTGGCAAGTAGACAGGATGAGGATTAGAACATGGAAAAGTTTAGTAAAACACCATATGTATATTTCAGGGAAAGCTAAGGGATGGTCTTATAGACATCACTATGAAAGCACTAATCCAAGAATAAGTTCAGAAGTACACATCCCACTAGGGGATGCTAAATTGGTAGTAACAACATATTGGGGTCTGCATACAGGAGAAAGAGACTGGCATTTGGGTCAGGGAGTCTCCATAGAATGGAGGAAAAAGAGATATAGCACACAAGTAGACCCTGGCCTAGCAGACCGACTAATTCATCTGTATTACTTTGATTGTTTTTCAGACTCTGCTATAAGAAAGTCCATATTAGGACATATAGTTAGCCCTAGTTGTGAATATCAAGCAGGACATAACAAGGTAGGATCTCTACAGTACTTGGCACTAGCAGCATTAACAACACCAAGAAGGATAAAGCCACCCTTTCCTAGTGTTACGAAACTGACAGAGGATAGATGGAACAAGCCCCAGAAGACCAAGGGCCACAGAGGGAGCCATACAATGACTGGACACTAGAGCTTTTAGAGGAGCTTAAGAATGAAGCTGTGAGACATTTCCCTAGGATATGGCTCCATAGTTTAGGGCAACATATCTATGAAACTTATGGGGATACTTGGACAGGAGTGGAAGCCTTAATAAGAATTCTGCAACAACTGCTGTTTATTCATTTCAGAATTGGGTGTCGACATAGCAGAATAGGCATTATTCAACAGAGGAGAACAAGAAATGGAGCCAGTAAATCCTAGCCTAGAGCCCTGGAAGCATCCAGGAAGTCAGCCTAAAACTGCTTGTACCAATTGCTATTGCAAAAAATGTTGCTTTCATTGCCAAGCTTGTTTCATAACAAAAGGCTTAGGCATCTCCTATGGCAGGAAGAAGCGGAGACAGCGACGAAGACCTCCTCAAGACAGTCAGACTCATCAAGTTTCTCTATCAAAGCAGTAAGTAGTACATGTAATGCTTTCTTTACAAATATTAGCAATAGTAGCATTAGTAGTAGCAGCAATAATAGCAATAGTTGTGTGGTCTATAGTATTCATAGAATATAGGAAAATATTAAGACAAAGAAAAATAGACAGATTAATTGATAGAATAAGAGAAAGAGAAGAAGACAGTGGCAATGAGAGTGAAGGAGATCAGGAAGAATTGGCAGCACTTGAGAGGGGGCATCTTGCTCCTTGGGATGTTGATGATCTGTAGTGCTGCAAAAGAAAAAACGTGGGTCACAATCTATTATGGGGTACCTGTGTGGAGAGAAGCAACCACCACTCTATTTTGTGCATCAGATGCTAAAGCCTATGATACAGAGGTACATAATGTTTGGGCCACACATGCCTGTGTACCCACAGACCCCAACCCACAAGAAGTAGTATTGGGAAATGTGACAGAAAATTTTAACATGTGGAAAAATAACATGGTAGATCAGATGCATGAGGATATAATCAGTTTATGGGATGAAAGCCTAAAGCCATGTGTAAAATTAACCCCACTCTGTGTTACTTTAAATTGCACTAATTTGAATATCACTAAGAATACTACTAATCCCACTAGTAGCAGCTGGGGAATGATGGAGAAAGGAGAAATAAAAAATTGCTCTTTCTATATCACCACAAGCATAAGAAATAAGGTAAAGAAAGAATATGCACTTTTTAATAGACTTGATGTAGTACCAATAGAAAATACTAATAATACTAAGTATAGGTTAATAAGTTGTAACACCTCAGTCATTACACAGGCCTGTCCAAAGGTATCCTTTCAGCCAATTCCCATACATTATTGTGTCCCGGCTGGGTTTGCGATGCTAAAGTGTAACAATAAGACATTCAATGGATCAGGACCATGCACAAATGTCAGCACAGTACAATGTACACATGGAATTAGGCCAGTGGTGTCAACTCAACTGCTGTTAAATGGCAGTCTAGCAGAAGAAGACATAGTAATTAGATCTGAAAATTTCACAGACAATGCTAAAACCATAATAGTACAGCTAAATGAATCTGTAGTAATTAATTGTACAAGACCCAACAACAATACAAGAAGAAGGTTATCTATAGGACCAGGGAGAGCATTTTATGCAAGAAGAAACATAATAGGAGATATAAGACAAGCACATTGTAACATTAGTAGAGCAAAATGGAATAACACTTTACAACAGATAGTTATAAAATTAAGAGAAAAATTTAGGAATAAAACAATAGCCTTTAATCAATCCTCAGGAGGGGACCCAGAAATTGTAATGCACAGTTTTAATTGTGGAGGGGAATTTTTCTACTGTAATACAGCACAACTGTTTAATAGTACTTGGAATGTTACTGGAGGGACAAATGGCACTGAAGGAAATGACATAATCACACTCCAATGCAGAATAAAGCAGATTATAAACATGTGGCAGAAAGTGGGAAAAGCAATATATGCCCCTCCCATTGCAGGAAGTATTAACTGTAGCTCAAATATTACAGGAATGATATTGACAAGAGATGGTGGTAATAATACTCATAATGAGACCTTCAGACCTGGAGGAGGAGACATGAGGGACAATTGGAGAAGTGAACTGTATAAATATAAAGTAGTAAGAATTGAACCAATAGGAGTAGCACCCACCAGGGCAAAGAGAAGAACAGTGCAAAGAGAAAAAAGAGCAGTGGGAATAGGAGCTGTGTTCCTTGGGTTCTTGGGAGCAGCAGGAAGCACTATGGGCGCAGCGTCAGTGACGCTGACGGTACAGGCCAGGCTATTATTGTCTGGTATAGTGCAGCAGCAGAACAATCTGCTGAGGGCTATTGAGGCGCAACAGCATATGTTGCAACTCACAGTCTGGGGCATCAAGCAGCTCCAGGCAAGAGTCCTGGCTCTGGAAAGATACCTAAGGGATCAACAGCTCATGGGAATTTGGGGTTGCTCTGGAAAACTCATTTGCACCACTTCTGTGCCTTGGAATGTTAGTTGGAGTAATAAATCTGTGGATGATATTTGGAATAACATGACCTGGATGGAGTGGGAAAGAGAAATTGACAATTACACAGACTATATATATGACTTACTTGAAAAATCGCAAACCCAACAAGAAAAGAATGAAAAAGAATTATTGGAATTGGATAAATGGGCAAGTTTGTGGAATTGGTTTGACATAACAAACTGGCTGTGGTATATAAGATTATTCATAATGATAGTAGGAGGCTTGATAGGTTTAAGAATAGTTTTTGCTGTACTTTCTATAGTAAATAGAGTTAGGCAGGGATATTCACCATTATCGTTTCAGACCCTCCTCCCAGCCTCGAGGGGACCCGACAGGCCCGAAGGAACAGAAGAAGAAGGTGGAGAGAGAGACAGAGACAGATCCGGTCCATTAGTGAACGGATTCTTGGCACTTTTCTGGGTCGATTTGAGGAACCTGTGCCTCTTCCTCTACCACCTCTTGAGAAACTTACTCTTGATTGTAACGAGGATTGTGGAACTTCTGGGACGCAGGGGGTGGGAAGCCCTCAAATATTGGTGGAATCTCCTGCAATATTGGAGCCAGGAACTAAAGAATAGTGCTGTTAGCTTGCTCAACGCCACAGCCATAGCAGTAGCTGAGGGGACAGATAGGGTTATAAAAATAGTACAAAGAGCTTGTAGAGCTATTCGCAACATACCTACAAGAATCAGACAGGGCTTGGAAAGGGCTTTGCTATAAGATGGGAGGCAAGTGGTCAAAACGTAGGGCAGAGGGATGGCAGACTATAAGGGAAAGAATGAGACGAGCTGAACCAGCTGAACCAGCAGCAGATGGGGTGGGAGCAGTATCTCGAGACCTGGCGAGACATGGAGCTATCACAAGTAGCAATACTAACAATGCTGATATTGCCTGGCTGGAAGCACAAGAGGAGGGAGAAGTGGGTTTTCCAGTCAGACCTCAGGTACCTTTAAGACCAATGACTTACAAGGCAGCTGTAGATCTTAGCCACTTTTTAAAAGAAAAGGGGGGACTGGAAGGGCTAGTTCACTCCCAGAAAAGACAAGATATCCTTGATCTGTGGGTCTACCACACACAAGGCTTCTTCCCAGATTGGCAGAACTACACACCAGGGCCAGGAATCAGATATCCACTGACCTTTGGATGGTGCTACAAGCTAGTACCAGTTGAGCCAGATGAAGGAGAGAACAACAGAGAGGACAACAGCTTGCTACACCCTGCTAACCAGCATGGAGTAGAAGACTCGGAGAGACAAGTGTTAGTGTGGAGGTTTGACAGCCGCCTAGCATTCCATCACGTGGCCCGAGAGCTGCATCCGGAGTACTTCAAGAACTGAACTGCTGACACTGAGCTATCTACAAGGGACTTTCCGCTGGGGACTTTCCAGGGAGGTGTGGCCTGGGCCGAACTGGGGAGTGGCGAGCCCTCAGATGCTGCATATAAGCAGCTGCTTTTTGCCTGTACTGGGTCTCTCTGGTTAGACCAGATCTGAGCCTGGGAGCTCTCTGGCTAGCTAGGGAACCCACTGCTTAAGCCTCAATAAAGCTTGCCTTGAGTGCTTCAAGTAGTGTGTGCCCGTCTGTTGTGTGACTCTGGTAGCTAGAGATCCCTCAGACCATCCTAGTTAGTGTAGAAAATCTCTAGCAGGG
>C.ZA.00.1217MB_AY463226_D.UG.98.98UG57132_AF484506
AGTAGTGTGTGCCCGTCTGTTGTGTGACTCTGGTAACTAGAGATCCCTCAGACCCTTTTTGGTAGTGTGGAAAATCTCTAGCAGTGGCGCCCGAACAGGGACTTGAAAGCGAAAGTAAGACCAGAGAAGATCTCTCGACGCAGGACTCGGCTTGCTGAAGTGCACTCGGCAAGAGGCGAGAGCGGCGACTGGTGAGTACGCCAAATTTTATTTTGACTAGCGGAGGCTAGAAGGAGAGAGATGGGTGCGAGAGCGTCAATATTAAGAGGCGACAAATTAGATACATGGGAAAGAATTAGGTTAAGGCCAGGGGGAAAGAAACACTATATGTTAAAACACCTAGTATGGGCAAGCAGGGAGCTGGAAAGATTTGCACTTAACCCTGGCCTTTTAGAAACATCAGAAGGCTGTAAACAAATAATGAAACAGCTACAACCAGCTCTTCAGACAGGAACAGAGGAACTGAAATCATTATACAACACAGTAGCAACTCTCTATTGTGTACATGAAAAGATAGCTGTGCGAGACACTAAGGAAGCCCTAGACAAGATAGAAGAAGAACAAAACAAAAGTCAGCAAGAAACACAGCAGGCACAAGCAGCTGACGGAAAGGTCAGTCAAAATTATCCTATAGTGCAGAATCTCCAAGGGCAAATGGTACATCAAGCCATATCACCTAGAACATTGAATGCATGGGTAAAAGTAATAGAGGAGAAGGCTTTTAGCCCAAAGGTAATACCCATGTTTACAGCATTATCAGAAGGAGCCACCCCACAAGATTTAAATACCATGTTAAATACGGTGGGGGGACATCAAGCAGCCATGCAAATGTTAAAAGATACCATCAATGAAGAGGCTGCAGAATGGGATAGATTACATCCAGTCCATGCAGGGCCTATTGCACCAGGCCAAATGAGAGAACCAAGGGGAAGTGATATAGCAGGAACTACTAGTACCCTTCAAGAACAAGTAGCATGGATAACAGGTAACCCACCTATTCCAGTGGGAGAAATCTATAAAAGATGGATAATTCTGGGGTTAAATAAAATAGTGAGAATGTATAGCCCTGTCAGCATTCTGGACATAAGACAAGGGCCAAAGGAACCCTTTAGAGACTATGTAGATCGGTTCTTTAAAACTTTAAGAGCTGAACAAGCTACGCAAGATGTAAAAAATTGGATGACAGACACCTTGTTGGTCCAAAATGCAAACCCAGATTGTAAGACCATTTTAAGAGCATTAGGACCAGGGGCTACATTAGAAGAAATGATGACAGCATGTCAGGGAGTGGGAGGACCTGGCCACAAAGCAAGAGTGTTGGCTGAGGCAATGAGCAAAGCAAACGGTAATATAATGATGCAGAGAAGCAATTTTAAAGGCCCTAAAAGAATTATTAAATGTTTTAACTGTGGCAAGGAAGGGCACCTAGCCAGAAATTGCAGAGCCCCCAGGAAAAAAGGCTGTTGGAAATGTGGAAAGGAAGGACACCAAATGAAAGACTGTAATGAGAGGCAGGCTAATTTTTTAGGGAAAATTTGGCCTTCCCACAAGGGGAGGCCAGGGAATTTCCTCCAGAACAGACCAGAGCCAACAGCCCCACCAGCAGAGAGCTTCAGGTTCGAGGAGACAACCCCCGCGCCGAAGCAGGAGCCGGGAGACAGGGAACCCTTAATTTCCCTCAAATCACTCTTTGGCAGCGACCCCTTGTCGCAATAAAAGTAGGGGGCCAGACAAGGGAGGCTCTCTTAGACACAGGAGCAGATGATACAGTATTAGAAGATATAAATTTGCCAGGAAAATGGAAACCAAAAATGATAGGAGGAATTGGAGGTTTTATCAAAGTAAGACAGTATGATCAAATAGTTATAGAAATTTGTGGAAAAAAGGCTATAGGTACAGTATTAGTAGGGCCTACCCCTGTCAACATAATTGGAAGAAACATGTTGACTCAGCTTGGATGCACATTAAATTTTCCAATCAGTCCTATTGAAACTGTACCAGTAAAACTGAAGCCAGGAATGGATGGCCCAAAGGTTAAACAATGGCCATTGACAGAAGAGAAAATAAAAGCATTGACAGAAATTTGTGACGAAATGGAAAAGGAAGGAAAAATTACAAAAATTGGGCCTGAAAATCCATATAATACTCCAATATTTGCCATAAAAAAGAAGGATAGTACTAAGTGGAGAAAATTAGTAGATTTCAGGGAACTCAATAAAAGAACTCAAGATTTTTGGGAGGTACAATTAGGAATACCACACCCAGCAGGGCTAAAAAAAAAAAGGTCAGTGACAGTACTGGATGTGGGGGATGCATATTTTTCAGTTCCTTTAGATGAAGGCTTCAGGAAATATACTGCATTCACCATACCTAGTATAAACAATGAAACACCAGGAATTAGATATCAATATAATGTGCTTCCACAAGGATGGAAAGGGTCACCAGCAATTTTCCAGAGTAGCATGACAAGAATCTTAGAGCCCTTTAGAACACAAAATCCAGAGATAGTCATCTACCAATATATGGATGACTTGTATGTAGGATCTGACTTGGAAATAGGGCAACATAGAGCAAAAATAGAAGAGTTAAGAAAACACCTATTAAAGTGGGGATTTACCACACCAGACAAGAAACATCAGAAAGAACCCCCATTTCTTTGGATGGGGTATGAACTCCATCCAGACAAATGGACAGTACAGCCTATACAGCTGCCAGAAAAGGAGAGCTGGACTGTCAATGATATACAGAAGTTAGTGGGAAAATTAAACTGGGCAAGTCAGATTTACCCAGGGATTAAAGTAAAGCAACTTTGTAAACTCCTTAGGGGGGCCAAAGCATTAACAGACATAGTACCACTAACTGAAGAAGCAGAATTAGAATTGGCAGAGAACAGGGAAATACTAAAAGAACCAGTACATGGGGTATATTATGACCCATCAAAAGACTTAATAGCTGAAATACAGAAACAGGGGGAGGATCAATGGACATATCAAATTTATCAAGAACCATTCAAAAATCTGAAGACAGGAAAATATGCAAAAAGGGGGACTGCCCACACTAATGATGTAAAACAGTTAACAGAGGCAGTGCAAAAAATAGCCTTGGAAAGCATAGTGATATGGGGAAAGACTCCTAAATTTAGACTACCCATCCAAAAGGAGACATGGGAGTTATGGTGGACAGACTATTGGCAAGCCACCTGGATTCCTGAGTGGGAGTTTGTTAATACCCCTCCCCTAGTAAAATTATGGTACCAGTTAGAAAAGGAACCCATAGCAGGAGCAGAAACTTTCTATGTAGATGGGGCAGCTAATAGAGAGACTAAATTAGGAAAAGCAGGATATGTTACTGACAGAGGAAGACAGAAAGTTGTCTCTCTAATTGACACAACAAATCAGAAAACTGAATTACAAGCCATTAATCTAGCTTTGCAGGATTCGGGAGTAGAAGTAAACATAGTAACAGACTCACAGTATGCATTAGGAATCATTCAAGCACAACCAGATAAGAGTGAATCAGAGTTAGTCAACCAAATAATAGAACAATTAATAAGAAAAGAAAGGGTCTACCTGTCATGGGTACCAGCACACAAAGGAATTGGAGGAAATGAACAAGTAGATAAATTAGTGAGTAGTGGAATCAGGAAAGTACTGTTTCTAGATGGGATAGATAAGGCCCAAGAAGATCATGAAAAGTATCACAACAATTGGAGAGCAATGGCTGATGAGTTTAATCTGCCACCCATAGTAGCAAAAGAAATAGTAGCTAGCTGTGATAAATGTCAGCTAAAAGGAGAAACCATACATGGACAAGTAGGCTGTAGCCCGGGGATATGGCAATTAGATTGTACACATTTAGAAGGGAAAGTCATCCTGGTAGCAGTCCATGTAGCCAGTGGCTACATAGAAGCAGAGGTTATCCCAGCAGAAACAGGAAGCGAAACAGCATACTATATACTAAAATTAGCAGGGAGATGGCCAGTCAAAGTAATACATACAGACAATGGCAGTAATTTCACCAGTGCTGCAGTTAAAGCAGCCTGTTGGTGGGCAGGTATCCAACAGGAATTTGGAATTCCCTACAATCCCCAAAGTCAGGGAGTAGTAGAATCCATGAATAAAGAATTAAAGAAAATCATAGGGCAGGTAAGAGATCAAGCTGAGCACCTTAAGACAGCAGTACAAATGGCTGTATTCATTCACAATTTTAAAAGAAAAGGGGGGATTGGGGGGTACAGTGCAGGGGAAAGAATAATAGACATAATAGCAACAGACATACAAACTAAAGAGTTACAAAAACAAATTACAAAAATTCAAAATTTTCGGGTTTATTACAGAGACAGCAGAGACCCCATTTGGAAAGGACCAGCCAAGCTACTCTGGAAAGGTGAAGGGGCAGTAGTAATACAAGATAACAGTGACATAAAGGTAGTACCAAGGAGGAAAGCAAAAATCATTAAGGACTATGGAAAACAGATGGCAGGTGCTGATTGTGTGGCAGGTAGACAGGATGAGGATTAGAACATGGAATAGTTTAGTAAAGCACCATATGTATGTCTCAAAGAGAGCTAGTGGATGGTTTTACAGACATCATTATGAAAGCAGACATCCAAAAGTAAGTTCAGAAGTACACATACCATTAGGGGATGCTAGATTAGTAGTAAGAACATATTGGGGTTTGCGACCAGGAGAAAGAGATTGGCATTTGGGTCATGGAGTCTCCATAGAATGGAGACAGAGAAGATACAGCACACAAGTAGATCCTGGCCTGGCAGACCAGCTAATTCATATGCATTATTTTGATTGTTTTGCAGACTCTGCTATAAGGAAAGCCATATTAGGACATATAGTTATTCCTAGGTGTGACTATCAAGCAGGACATAATAAGGTAGGATCCCTACAATACTTGGCGCTGACAGCATTGATAAAGCCAAAAAAGAGAAAGCCACCTCTGCCTAGTATTAGCAAATTAGTAGAGGATCGATGGAACAACCCCCAGAAGATCAGGGGCCGCAGAGAGAACCATACAATGAATGGACATTAGAGATTCTAGAGGAACTCAAGCAGGAAGCTGTCAGACACTTTCCTAGACAATGGCTCCATAACTTAGGACAGTATATCTATGCAACCTATGGGGATACTTGGAGGGGAGTTGAAGCTATAATGAGAGTCCTGCAACAACTACTGTTTATCCATTTCAGAATTGGGTGCCAGCATAGCAGAATAGGAATCTTGCGACAGAGAAGAGCAAGAAATGGAGCCAGTAGATCCTAACCTAGAGCCCTGGAATCATCCAGGAAGTCAGCCTAAAACTCCTTGTAACAAGTGCTATTGTAAATACTGTAGCTACCATTGTTTAGTTTGCTTTCAGACAAAAGGCTTAGGCATTTCCTATGGCAGGAAGAAGCGGAGACAGCGACGAAGCACTCCTCTTGGCAGTGAGGACCATCAAAATCTTATATCAAAGCAGTAAGTATATGTAGTGTTAAGTTTACTAGCAAGAGTAGATTATAGATTAGGAGTAGGAGCATTGATAATAGCTTTAGGCATAGCAATAGTTGTGTGGATTTTAGCATATATAGAATATAGGAAATTGGTAAGACAAAGAAAAATAGACTGGTTAGTTAAAAGAATTAGGGAAAGAGCAGAAGACAGTGGCAATGAGAGTGAAGGGGATACTGAGGAATTGGCCACAATGGTGGATATGGGCCATCTTAGGCTTTTGGATGATAATAATGTGTAGGGTGATGGGGAACTTGTGGGTCACAGTCTATTATGGGGTACCTGTGTGGACAGAAGCAAAAACTACTCTATTCTGTGCATCAGATGCTAAAGCATATGACACAGAAGTGCATAATGTCTGGGCCACACATGCCTGTGTACCCACAGACCCCAACCCACAAGAAATAGTTTTGGAAAATGTAACAGAAAATTTTAACATGTGGAAAAATGACATGGCGGATCAGATGCATGAGGATATAATCAGTTTATGGGATCAAAGTCTAAAACCATGTGTAAAGTTGACCCCACTCTGTGTCACTTTAAATTGTACAAATACTACTGGGAATAACATCGAAAATAACATGAAGGAAGAAATAAAAAATTGCTCTTTCAATACAACCACAGAATTAAGAGATAAGAAACAGAAAGCATATGCACTTTTTTATAGACCTGATATAGTACCACTTAGTGGGAGTAACTCTAGTGAGTATATATTAATAAATTGCAATACCTCAACCATAACACAAGCCTGTCCAAAGGTCACTTTTGACCCAATTCCTATACATTATTGTACTCCAGCTGGTTATGCGATTCTAAAGTGTAATAATAAGACATTCAATGGGACTGGGCCATGCCATAATGTCAGTACAGTACAATGTACACATGGAATTAAGCCAGTGGTATCAACTCAACTACTGTTAAATGGTAGCCTAGCAGAAAAGGAGATAATAATTAAATCTGAAAATATGACAGACAATGTCAAGACAATAATAGTCCACCTTAATGAATCTGTAGGAATTGTGTGTACAAGACCCAACAATAATACAAGAAAAAGTATAAGGATAGGACCAGGACAAACATTCTATGCAAATGACATAATAGGAAATATAAGAGAAGCACATTGTAACATTAGTGAACGCCAATGGAACATAACTTTAGAAAGGGTAAAGGAAAAATTAAGAGAACATTACCCTAATAAAACAATAAAATTTAACTCATCTTCAGGAGGGGATCTAGAAGTTACAACACATAGCTTTAATTGTAGAGGAGAATTTTTCTATTGCAATACCACAAACCTGTTTGCCACAGAACTGGGTTCTAATAGAAGTGAGTCAAACATCACAAAGGAGTCAAACATCACACTCCCATGTAGGATAAAACAAATTATAAACATGTGGCAGGGGGTAGGACGAGCAATGTATGCCCCTCCCATTGAAGGAAACATAATGTGTAACTCAAGTATCACAGGAATACTATTAACACGTGATGGAGGAGGAGGAGGAGACAATCTCACAGAGATATTCAGACCTGGAGGAGGAAATATGAAGGACAATTGGAGAAATGAATTATATAAATATAAAGTGGTAGAAATTAAGCCATTGGGAGTGGCACCCACTGAATCAAAAAGGAGAGTGGTGGAGAGAGAAAAAAGAGCAGTGGGAATAGGAGCTGTACTCCTTGGGTTCTTGGGAGCAGCAGGAAGCACTATGGGCGCGGCGTCAATAACGCTGACGGTACAGGCCAGACAATTGTTGTCTGGTATAGTGCAACAGCAAAGCAATTTGCTGAGAGTCATAGAGGCGCAACAGCATATGTTGCAACTCACGGTCTGGGGCATTAAGCAGCTCCAGACAAGAGTCCTGGCTATAGAAAGATGCCTAAAGGATCAACAGCTCCTAGGGCTTTGGGGCTGCTCTGGAAAACTCATCTGCACCACTAATGTGCCTTGGAACTCCAGTTGGAGTAATAAATCTCAAACAGATATTTGGAATAACATGACCTGGATGCAGTGGGATAAAGAAATTAGTAATTACACAGGCACAATATACAGGTTGCTTGAAGACTCGCAAAACCAGCAAGAGAGAAATGAAAAAGATTTATTAGCATTGGACAGTTGGAAAAACCTGTGGACTTGGTTTGACATATCAAATTGGCTGTGGTATATAAGAATATTCATCATGATAGTAGGAGGCTTGATAGGTTTGAGAATAATTTTTGGTGTACTCTCTATAGTGAAAAGAGTTAGGCAGGGATACTCACCTTTGTCATTTCAGACCCTTACCCCAAACCCGAGGGGACCCGACAGGCTCGGAAGAATCGAAGAAGAAGGTGGAGAGCAAGACAAAGACAGATCAGTGAGATTAGTAACCGGATTCTTAGCACTTGCCTGGGACGATCTGCGGAGCCTGTGCCTCTTCAGCTACCACCAATTGAGAGACTTCATATTGATTGCAGCGAGAGCAGTGGAACTTCTGGGACGCAGCAGTCTCCGGGGACTACAGAAAGGGTGGGAAGCCCTTAAGTATCTGGGAAATCTTGTGCAGTATTGGGGTTTGGAGCTAAAAAAGAGTGCTATTAATCTACTTAATACCATAGCAATAGCAGTAGCTGAAGGAACAGATAGGATTCTTGAAATAGTACAAAGAATTTGTAGAGCTATCCGCAACATACCTAGAAGAATAAGACAGGGCTTTGAAGCAGCTTTGCTATAAAATGGGAAGCAAGTGGTCAAAAAGCAGCATAGTTGGATGGCCTGCTGTAAGAGAAAGACTAAGACAAGCTGAGCCAGCAGCAGAGGGAGTAGGAGCAGCGTCTCAAGACCTAGATAAATATGGAGCACTTACAAGCAGCAACACAGTCCACAATAATGCTGATTGTGCCTGGCTGCAAGCACAAGAGGAGGAAGAAGAAGTAGGCTTTCCAGTCAGGCCTCAGGTGCCTTTAAGACCAATGACTTATAAGGCAGCATTCGATCTCAGCTTCTTTTTAAAAGATAAGGGGGGACTGGAAGGGTTAATTTGGTCTAAGAAAAGGCAAGATACCCTTGATTTATGGGTCTATCACACACAAGGCTACTTCCCTGATTGGCAAAACTACACACCGGGACCAGGGGTCAGATATCCCCTGACCTTTGGATGGTGCTTCAAGCTAGTGCCAGTCGACCCAAGGGAAGTAGAAGAAGCCAACAAAGGAGAAAACAATTGTTTGCTACACCCTTTGAGCCAGCATGGAATAGAGGATGCAGAAAGAGAAGTATTAAAGTGGGAGTTTGACAGCAGCCTAGCACGCAGACACCTGGCCCGCGAGAAACATCCGGAGTTTTACAAAGACTGCTGACACAGAAGGGACTTTCCGACTGGGACTTTCCACTGGGGCGTTCCAGGAGGTGTGGTCTGGGCGGGACGAGGGAGTGGTCAACCCGCAGATGCTGCATATAAGCAGCTGCTTTTCGCCTGTACTGGGTCTCTCTAGGTGGACCAGATCTGAGCCTGGGAGCTCTCTGGCTACTTAGGGAACCCACTGCTTAAGCCTCAATAAAGCTTGCCTTGAGTGCTCTA
>C.ZA.03.03ZASK006B2_AY878056_F1.BE.93.VI850_AF077336
TCTGTTGTGTGACTCTGGTAACTAGAGATCCCTCAGACCCTTTTTGGTAGTGTGGAAAATCTCTAGCAGTGGCGCCCGAACAGGGACTTGAAAGCGAAAGTAAGACCAGAGAAGATCTCTCGACGCAGGACTCGGCTTGCTGAAGTGCACTCGGCAAGAGGCGAGAGCGGCGGCTGGTGAGTACGCCAAATTTTATTTGACTAGCGGAGGCTAGAAGGAGAGAGATGGGTGCGAGAGCGTCAATATTAAGAGGGGAGAATTTGGATAGATGGGAAAAAATTAGGTTAAGGCCAGGGGGAAAGAAACAATATAGGTTAAAACATTTAGTATGGGCAAGCAGGGAGCTGGAAAGATTCGCACTTAACCCTGGCCTTTTAGAAACATCAGAGGGCTGTAAACAAATACTGGCACAGCTACAACCAGCTCTTCAGACAGGAACAGAGGAAATTAAATCACTATACAACACAGTAGCAACTCTCTATTGTGTACATAAAAAGATAGATGTACGAGACACCAAGGAAGCCTTAGACAAGATAGAGGAAGAACAAAACAAAAGTCAGCAAAAAACACAACAGGCAAAAACGGCTGACGGAAAGGTCAGTCAAAATTATCCTATAGTACAGAATCTCCAAGGGCAAATGGTACATCAAGCCATATCACCTAGAACCTTGAACGCATGGGTAAAAGTAATAGAAGAGAAGGGCTTTAATCCAGAAGTAATACCCATGTTTACAGCATTATCAGAAGGAGCCACCCCACAAGATTTAAACACCATGTTAAATACGATAGGGGGACATCAAGCAGCCATGCAAATGTTAAAAGATACCATCAATGAGGAGGCTGCAGAATGGGATAGATTACATCCAGTACATGCAGGGCCTGTTGCACCAGGCCAAATGAGGGAACCAAGGGGAAGCGACATAGCAGGATCTACTAGTACCCTTCAGGAACAAGTAGCATGGATTACAGGTAATCCAGCTATCCCAGTGGGAGAAATCTATAAAAGATGGATAATTCTGGGGTTAAATAAAATAGTAAGAATGTATAGCCCTGTCAGCATTTTGGACATAAAACAAGGGCCAAAGGAACCCTTTAGAGACTATGTAGGTCGGTTCTTTAAAGCTTTAAGAGCTGAACAAGCTACACAAGATGTAAAAAATTGGATGACAGACACCTTGTTGGTCCAAAATGCGAACCCAGATTGTAAGACCATTTTGAAATCATTAGGAACGGGGGCTACATTAGAAGAAATGATGACAGCATGCCAGGGAGTGGGAGGACCTAGCCACAAAGCAAGAGTGTTGGCTGAGGCAATGAGCCAGGCAAACAGTACAAACATAATGATGCAGAGAAGCAATTTTAAAGGCTCTAGAAGAGTTGTTAAATGTTTCAACTGTGGCAAGGAGGGGCACATAGCCAAAAATTGCAGGGCCCCTAGAAAAAAGGGCTGTTGGAAATGTGGAAAGGAAGGACACCAAATGAAAGACTGTACTGAGAGACAGGCTAATTTTTTAGGGAAAATTTGGCCTTCCCACAAGGGGAGGCCAGGAAATTTTTTGCAGAACAGACCAGAGCCAACAGCCCCACCAGCAGAGAGCTTCAGACCAGAGCCAACAGCCCCACCAGCAGAGAGCTTCAGGTTCGAGGAGACACCCCCCGCTCCGAAGCAGGAGCCGAAAGACAGGGAACCCTTAACTTCCCTCAAATCACTCTTTGGCAGCGACCCCTGGTCTCAATAAAAGTAGGAGGCCAAATAAAAGAGGCTCTCTTAGATACAGGAGCAGATGATACAGTATTGGAAGAAATAAATTTGCCAGGAAAATGGAAACCAAGAATGATAGGAGGAATTGGAGGTTTTATCAAAGTAAGACAGTATGATCAAATACCTATAGAAATTTGTGGACAAAAGGCAATAGGTACAGTATTAGTAGGGCCTACACCTGTCAACATAATTGGAAGAAATCTGTTGACTCAGCTTGGATGCACGCTAAATTTTCCAATTAGTCCCATTGAAACTGTACCAGTACAACTGAAGCCAGGAATGGATGGCCCAAAGGTTAAACAATGGCCATTGACAGAAGAGAAAATAAAAGCATTAACAGAAATTTGTGAAGAAATGGAAAGGGAGGGAAAAATTACAAAAATTGGGCCTGAAAATCCATATAACACTCCAGTATTTGCCATCAAAAAGAAGGATGGTAATAAATGGAGAAAATTAGTAGATTTCAGGGAACTCAATAAAAGGACCCAAGACTTCTGGGAGGTTCAATTAGGAATACCACACCCAGCAGGGTTAAAAAAGAAAAAATCAGTGACAGTACTGGATGTGGGAGATGCATATTTTTCAGTTCCCTTATATGAAGGCTTCAGGAAATATACTGCATTCACCATACCTAGTATAAACAATGAAGCACCAGGGATTAGATATCAATATAATGTGCTTCCACAGGGATGGAAAGGATCACCAGCAATATTCCAGAGTAGCATGACAAAGATCTTAGAGCCCTTTAGAGCACAAAATCCAGAAATAGTCATCTATCAATATATGGATGATTTGTATGTAGGATCTGACTTAGAAATAGGGCAACATAGAGCAAAAATAGAGGAGTTAAGAGAACATCTATTAAAGTGGGGATTTACCACACCAGACAAGAAACATCAGAAAGAACCCCCATTTCTCTGGATGGGATATGAACTCCATCCTGACAAATGGACAGTACAGCCTATACAGCTGCCAGAAAAGGATAGCTGGACTGTCAATGATATACAGAAGTTAGTGGGAAAATTAAACTGGGCAAGTCAGATTTATGCAGGGATTAAAGTAAGGCAACTTTGTAAACTCCTTAGGGGGGTCAAGGCACTAACAGACATAGTACCACTAACTGAAGAAGCAGAATTAGAATTGGCAGAGAACAGGGAAATTCTAAAGGAACCAGTACATGGAGTATATTATGACCCATCAAAAGACCTAATAGCTGAAATACAGAAACAGGGGGATGACCAATGGACATATCAAATTTACCAAGAACCATTCAAGAATCTGAAAACAGGAAAGTATGCAAAAATGAGGAATGCACACATTAATGATGTAAAACAGCTAACAGAGGCAGTGCAAAAAATAGCATTGGAAAGCATAGTGATATGGGGAAAGACTCCTAAATTTAGACTACCCATCCAAAAAGAAACATGGGAGGTATGGTGGACAGACTATTGGCAAGCCACCTGGATTCCTGAGTGGGAGTTTGTTAATACCCCTCCCCTAGTAAAATTATGGTACCAGCTGGAGAAAGAACCCATAGCAGGAGCAGAAACTTTCTATGTAGATGGAGCAGCTAATAGGGAAACTAAAAAAGGAAAAGCAGGGTATGTTACTGACAAAGGAAGGCAGAAAATTGTTTCTCTAAGTGAAACAACAAACCAGAAGACTGAATTACAAGCAATTCAACTAGCTTTGCAAGATTCAGGACCAGAAGTAAACATAGTAACAGACTCACAGTATGCATTAGGAATCATTCAAGCACAACCAGATAAGAGTGAATCAGAATTAGTCAACCAGATAATAGAACAATTAATAAAGAAAGAAAAGGTCTACCTGTCATGGGTACCAGCACACAAGGGAATTGGAGGAAATGAACAAGTAGACAAATTAGTAAGTAATGGAATCAGGAAAGTGTTGTTTCTAGATGGAATAGATAAGGCTCAAGAAGAGCATGAAAAGTATCACAGCAATTGGAGAGCAATGGCTAGTGAGTTTAATCTGCCACCTGTAGTAGCAAGAGAAATAGTAGCCAGCTGTGACAAATGTCAGCTAAAAGGGGAAGCCATGCATGGATAAGTAGACTGTAGTCCAGGGATATGGCAATTAGATTGTACACATTTAGAAGGAAAAGTCATCCTAGTAGCAGTCCACGTAGCCAGTGGCTACATAGAAGCAGAGGTTATCCCAGCAGAAACGGGACAAGAAACAGCATACTATATACTAAAATTAGCAGGCAGATGGCCAGTCAAAGTGATACATACAGACAATGGCAGTAATTTCACCAGTGCTGCAGTTAAGGCAGCCTGTTGGTGGGCAGGTATCCAACAGGAATTTGGGATCCCCTACAATCCCCAAAGTCAGGGAGTAGTAGAATCCATGAATAAAGAATTAAAGAAAATCATAGGGCAGGTAAGAGATCAAGCTGAGCACCTTAAGACAGCAGTACAAATGGCAGTGTTCATTCACAATTTTAAAAGAAAAGGGGGGATTGGGGGGTACAGTGCAGGGGAAAGAATAATAGACATAATAGCAACAGACATACAAACTAAAGAATTACAAAAACAAATTATAAAAATTCAAAACTTTCGGGTTTATTACAGAGACAGCAGAGACCCTATTTGGAAAGGACCAGCCAAACTACTCTGGAAAGGTGAAGGGGCAGTAGTAATACAAGACAACAGTGACATAAAGGTAGTACCAAGGAGGAAAGTAAAAATCATTAGGGACTATGGAAAACAGATGGCAGGTGCTGATTGTGTGGCAGGTAGACAGAATGAGGATCAGAACATGGAATAGTTTAGTAAAGCACCATATGTATATTTCAAAGAAAGCTAAGGGATGGTTTTACAGACATCATTATGAAAGCAGAAATCCAAAAGTAAGTTCAGAAGTACACATACCATTAGGGGAAGCTAGATTAATAATAAGAACATATTGGGGTTTGCAAACAGGAGAAAGAGAGTGGCATTTGGGTCATGGAGTCTCCATAGAATGGAGCTGGAAAAAATATAGCACACAAGTAGACCCTGGCCTGGCAGATCAGCTAATTCATATGCATTATTTTGATTGTTTTGCAGACTCTGCCATAAGAAAAGCCATATTAGGACACATAGTTATTCCTAGGTGTGACTATCAAGCAGGACATAATAAGGTAGGATCTCTACAATACTTGGCACTGACAGCATTGATAAAACCAAAAAAGAGAAAGCCACCTCTGCCTAGTGTCAGGAAATTAGTAGAGGATAGATGGAACAAATCCCAGAAGACCAGGGGCCGCAGAGGGAACCATACAATGAATGGGCACTAGAGATTCTAGAGGAACTCAAGCAGGAAGCTGTCAGACACTTTCCTAGACCTTGGCTCCATGGCTTAGGACAGCATATCTATGAAACCTATGGAGATACTTGGACAGGAGTTGAAAGTCTGATAAGAATACTGCAACAACTGCTGTTTATTCATTTCAGAATTGGGTGCCAGCATAGCAGAATAGGAATCTGGCGACAGAGAAGAGCAAGAAATGGAGCCAGTAGATCCTAACCTAGAGCCCTGGAACCATCCAGGAAGTCAGCCTCAAACTCCTTGTAATAATTGCTATTGTAAACACTGTAGCTACCATTGTTTAGTTTGCTTTCAGACAAAAGGCTTAGGCATTTCCTATGGCAGGAAGAAGCGGAGACAGCGACGAAGCACTCCTCCAAGCAGTGAGGATCATCAGAATCTTATATCAAAGCAGTGAGTATACATATATGTAATGTTAAGTTTACTAGCAAGAGTAGATTATAGATTAGGAGTAGGAGCATTGATAGTAGCATTAATCTTAGCAATAGTTGTGTGGGTCATAGCATATTTAGAATATAAGAAACTGGTAAGGCAAAGAAAAATAAATAAATTATATAAAAGAATAAGAGAAAGAGCAGAAGACAGTGGCAATGAGAGTGAGGGGGATGCAGAGGAATTGGCAGCACTTGGGGAAATGGGGCCTTTTATTCCTGGGGATATTAATAATCTGTAATGCTGCAGACAACTTGTGGGTCACAGTCTATTATGGGGTACCTGTGTGGACAGATGCAAAAACCACTCTATTCTGTGCATCAGATGCTAAAGCATATGAGAAAGAAGTGCATAATGTCTGGGCTACACATGCCTGTGTACCCACAGACCCCAACCCACAAGAATTGGGTTTAGGAAATGTAACAGAAAATTTTAACATGTGGAAAAATGACATGGTGGATCAGATGCATGAGGATATAATCAGTTTGTGGGATCAAAGTCTAAAACCATGTGTAAAGTTAACTCCACTCTGTGTCACTTTAAAGTGTACAAATGCCACTGCTAATGCTAACATAAAGGGAGAAATAAACCTTATGAATGCTAGCATAAAGGGAGAAATGAAAAACTGCTCTTTCAATATAACCACAGAAATAAGAGATAAGAAACAGAAAGTGCATGCACTCTTTTATAGATCTGATGCAATACCACTTAATGGGAATAGCTCTAATAGCTCTAGTAACTCTAGTGAGTATATATTAATAAATTGCAATACTTCAACCATAACACAAGCCTGTCCAAAGGTTTCCTTTGATCCAATTCCTATACATTATTGTGCTCCAGCTGGTTATGCGATTCTAAAGTGTAATAATAATACATTCAATGGGACAGGACCATGCCTTAATGTCAACACAGTACAATGTACACATGGAATTAAGCCTGTGGTATCAACTCAACTACTGTTAAATGGTAGCCTAGCAGAAGGGGAAGTAATAATTAGATCTGAAAATCTGACAGACAATGCTAAAACAATAATAGTACACCTTAATGAATCTGTAGAAATTGTGTGTATAAGACCTGGCAATAATACAAGACAAAGTACAAGGATAGGACCTGGGCAAGTATTCTATACACATAGCATAATAGGAGACATAAGACAAGCATATTGTAACATTAGTGCAGAAAAATGGAACAAAACTTTGGAAAGGGTAGAGGAGAAACTAAAAGAACACTTCCCTAATAAAACAATACAATTTAACTCGTCCTCAGGAGGGGACCTAGAAGTTACAACACATAGCTTTAATTGTAGAGGAGAATTTTTCTATTGCAATACAACAAAATTATTTTCTAGCAATACAACTTATAATGCTAGTGAGGGAAACAGGACCATCACCATCCTATGCAGGATAAAACAAATTATAAACATGTGGCAGGGGGTAGGACAAGCAATGTACGCCCCTCCCATTGCAGGAAACATAACATGTAACTCAAATATCACAGGACTACTATTGACACGTGATGGTGGTACCAACAACAACAACACAGAGACATTCAGACCTGGAGGAGGAAATATGAAGGACAGTTGGAGAAGTGAATTATATAAATATAAAGTGGTAGAAATTAAGCCATTGGGAGTAGCACCCACCAAGGCAAAAAGGAGAGTGGTGGAGAGAGAAAAAAGAGCAGCGGGAATAGGAGCTGTGATCTTTGGGTTCTTGGGAGCAGCAGGAAGCACTATGGGCGCGGCGTCATTAACGCTGACGGTACAGGCCAGACAACTGTTGTCTGGTATAGTGCAACAGCAAAGCAATTTGCTGAGAGCTATAGAGGCGCAACAGCATATGTTGCAACTCACGGTCTGGGGCATTAAGCAGCTCCAGGCAAGAGTCCTGGCTATAGAAAGATACCTAAAGGATCAACAGCTCCTAGGGCTTTGGGGCTGCTCTGGAAAACTCATCTGCACCACTGCCGTGCCTTGGAACGTCAGTTGGAGCAATAGATCTACAGAAGATATTTGGAATAATCTGACCTGGATGCAGTGGGATAGAGAAATTAATAATTACACAGACACAATATATAGGTTGCTTGAAGCCTCGCAAAACCAGCAGGAGAAAAATGAACAGGATTTATTAGCATTGGACAGCTGGAAAAATCTGTGGAGTTGGTTTAACATAACAAATTGGCTGTGGTGTATAAAAATATTCATCATGATAGTAGGAGGCTTGATAGGTTTAAGAATAATTTTGGGTGTGATCTCTATAGTGCATAGAGTTAGGCAGGGATACTCACCTTTGTCGTTTCAGACCCTTACCCCAGTCCCGAGGGGACTCGACAGGCTCGGAAGAATCGAAGAAGAAGGTGGAGAGCAAGACAAAGACAGACCCATTCGATTAGTGAACGGATTCTTGTCGATTGCCTGGGACGATCTGCGGAGCCTGTGCCTCTTCAGCTACCACCAATTGAGAGACTTCATATTGATTGTGACGAGAGCAGTGGAACTTCTGGGACGCAGCAGCCTCAAGGGACTACAGAGGGGGTGGGAAGCTCTTAGGTATCTGGGAAATCTTGTGCAGTATTGGGGGCTGGAGCTAAAAAAGAGTGCTATTAGTCTGCTTGATACCATAGCAATAGCAGTAGCTGAGGGAACAGATAGGATTATTGAAGTAATACAAAGACTTTGTAGAAGAACAAGACAGGGCCCTGAAGTAGCTCTGCTATAAAATGGGGGGCAAGTGGTCAAAAAGCAGCATAGTTGGATGGCCTGCTGTAAGAGAAAGAATAAGACGAACTAGGTCAGCAGCAGAGGGCAGAGCAGCAGAGGGAGTAGGAGCAGCATCTCGAGACTTAGATAAACATGGAGCACTTACAACTAGCAACACAGCCCACAATAATGCTGATTGTGCCTGGCTGCAAGCACAAGAGGAGGA
>C.TZ.97.97TZ04_AF361874_F2.CM.95.MP257_AJ249237
GTGCGAGAGCGTCAATATTAAGAGGGGGAAAATTAGATACATGGGAAAAAATTAGGTTAAGGCCAGGGGGAAAGAAACACTATATGATAAAACACCTAGTATGGGCAAGCAGAGAGCTGGAAAGATTTGCACTTAACCCTGGTCTTTTAGAGACATCAGAAGGCTGTAAACAAATAATAAAACAGCTACACCCAGCTCTTCAGACCGGAACAGAAGAACTTAGATCATTATATAACACAGTAGCAACTCTCTATTGTGTACATGCAAAAATAGAGGTACGAGACACCAAGGAAGCCTTAGATAAGATAGAGGAAGAACAAAACAAAAGTCAGCAAAAAGCACAGCAGGCAGAAGCGGCTGGCGGAAAGGTCAGTCAAAATTATCCTATAGTGCAGAATCTCCAAGGGCAAATGGTACACCAGGCCATATCACCTAGAACTTTAAATGCATGGGTAAAAGTAGTAGAGGAGAAGAACTTCAGCCCAGAGGTAATACCCATGTTTACAGCATTATCAGAAGGTGCCACCCCACAAGATTTAAACACCATGTTAAATACAGTGGGGGGACATCAAGCAGCCATGCAAATGTTAAAAGACACCATCAATGAAGAGGCTGCAGAATGGGATAGGGTGCATCCAGTACATGCAGGGCCTGTTGCGCCAGGCCAAATAAGAGAACCAAGGGGAAGCGATATAGCAGGAACTACTAGTACCCTTCAGGAACAAATAACCTGGATGACAAGTAACCCACCTATCCCAGTGGGAGACATCTATAAAAGATGGATAATCATGGGGTTAAATAAAATAGTAAGAATGTATAGCCCTGTCAGCATTTTGGACATAAGACAAGGGCCAAAGGAACCCTTTAGAGACTATGTAGACAGATTCTTTAAAGCATTAAGAGCTGAACAAGCTACACAAGATGTAAAAAATTGGATGGCAGACACCTTGTTGGTCCAAAATGCGACCCCAGATTGTAAGACCATCTTAAGGGGATTAGGACCAGGGGCTACATTAGAAGAAATGATGACAGCATGTCAGGGAGTGGGAGGACTTGGCCACAAAGCAAGAGTTTTGGCTGAGGCAATGAGCCAGGTAAACAAGACAAATATACTGGTACAGAGAAGCAATTTTACTAGAAAACCAGTTAAATGTTTCAATTGTGGCAAGGAAGGACACATAGCCAGAAATTGCAGGGCCCCTAGGAAGAAAGGCTGTTGGAAGTGTGGAATGGAAGGACACCAAATGAAAGACTGTACTGAGAGGCAGGCTAATTTTTTAGGGAAAATTTGGCCTTCCCACAAGGGGAGGCCAGGAAACTTTCTTCAGAACAGACCAGAGCCAACAGCCCCACCAGAGCCAACGGCCCCACCAGCAGAGAGCTTCAGGTTCGAGGAGATGACCCCCTCTCAGAAGCAGGAGCTGAAGGACAGGGAACCCTTAACTTCCCTCAAATCACTCTTTGGCAGCGACCCCTAGTCTCAATAAAAGTAGGGGGACAGATAAAAGAGGCTCTCCTAGATACAGGAGCAGATGATACAGTATTAGAAGAAATAAATTTGCCAGGAAAATGGAAACCAAAAATGATAGGAGGAATTGGAGGTTTTATCAAAGTAAGACAATATGATCAAATACCTATAGAAATTTGTGGAAAAAAGGCTATAGGTACAGTATTAGTGGGACCTACACCTGTCAACATAATTGGAAGAAATTTGTTGACTCAGCTGGGATGCACACTAAATTTTCCAATTAGTCCCATTGAAACTGTACCAGTAAAATTAAAGCCAGGAATGGATGGCCCAAAGGTTAAACAATGGCCATTGACAGAAGAGAAAATAAAAGCATTAACAGCAATTTGTGAAGAAATGGAGAAGGAAGGAAAAATTACAAAAATTGGGCCTGAAAATCCATATAACACTCCAGTATTTGCCATAAAAAAGAAAGACAGTACTAAGTGGAGAAAATTAGTAGATTTCAGGGAACTCAATAAAAGAACTCAAGACTTTTGGGAAGTTCAGTTAGGAATACCACACCCAGCAGGGTTAAAAAAGAAAAAATCAGTGACAGTACTGGATGTGGGGGATGCATATTTTTCAGTCCCTTTAGATGAAGACTTTAGGAAATATACTGCATTCACCATACCTAGTACAAATAATGAGACACCAGGGATTAGATATCAATATAATGTGCTACCACAGGGATGGGAAGGATCACCAGCAATATTCCAGTGTAGCATGACAAAAATTTTAGAGCCTTTTGGGGCACGAAATCCAGAAATAGTCATTTATCAATATATGGATGACTTGTATGTAGGATCTGACTTAGAAATAGGGAAGCATAGAGCAAAAGTAGAGGAGTTAAGAGAACATTTATTGAGATGGGGATTTACCACACCAGACAAGAAACATCAGAAAGAACCCCCATTTCTTTGGATGGGGTATGAACTCCATCCTGACAAATGGACAGTGCAGACTATACAGCTGCCAGAAAAAGATAGCTGGACTGTCAATGATATACAGAAGTTAGTGGGAAAATTAAACTGGGCAAGTCAGATTTACCCAGGGATTAGAGTAAAGCAACTGTGTAAACTCCTTAGGGGAGCCAAAGCACTAACGGACATAGTAACACTGACTGAAGAAGCAGAATTAGAATTGGCAGAGAACAGGGAAATTTTAAAAGAACCAGTACATGGAGTATATTATGACCCATCAAAAGACTTAATAGCTGAAATACAGAAACAGGGGCATGACCAATGGACATACCAAATTTACCAAGAGCCATTTAAAAATCTGAAAACAGGAAAATATGCAAAAATGAGGACTGCCCACACTAATGATGTAAAACAGTTAACAGAGGCAGTGCAAAAAATAGCCATGGAAAGCATAGTAATATGGGGAAAGACCTCTAAATTTAGACTACCCATCCAAAAGGAAACATGGGAGACATGGTGGACAGACTATTGGCAAGCCACCTGGATTCCTGATTGGGAGTTTGTTAATACCCCTCCCCTAGTAAAATTATGGTATCAGTTAGAGAAAGAACCCATAGTAGGAGCAGAAACTTTCTATGTAGATGGAGCAGCTAATAGGGAAACTAAAGTAGGAAAAGCAGGGTATGTTACTGACAGAGGAAGGCAGAAGATTGTTACTCTAGCTGAAACAACAAATCAGAAGACTGAATTACAAGCAATTCAGCTAGCTTTGCAGGATTCGGGATCAGAAGTAAATATAGTAACAGACTCACAGTATGCATTAGGAATCATTCAAGCACAACCAGATAAGAGTGAATCAGAGTTAGTCAATCAAATCATAGAACAGTTAATAAAAAAGGAAAAGGTCTATCTGTCATGGGTACCAGCACATAAAGGAATTGGAGGAAATGAACAAGTAGATAAATTAGTAAGCAGTGGAATCAGGAAAGTGCTGTTCCTAGATGGAATAGATAAGGCTCAAGAGGAACATGAAAAATATCACAGCAATTGGAGAGCAATGGCTAGTGATTTTAACCTGCCACCTGTAGTAGCAAAAGAAATAGTAGCCAGCTGTGATAAATGTCAGCTAAAAGGGGAAGCCATGCATGGACAAGTAGACTGCAGTCCAGGGATATGGCAATTAGATTGTACACATTTAGAAGGAAAAATTATCCTAGTAGCAGTCCATGTAGCTAGTGGCTATATGGAAGCAGAGGTTATCCCAGCAGAAACAGGACAAGAAACAGCATACTTTCTACTAAAACTAGCAGGAAGATGGCCAGTCAAAGTGGTACATACAGACAATGGCAGTAATTTCACCAGTAATGCAGTCAAGGCAGCCTGTTGGTGGGCAGGTATCCAACAGGAATTTGGAATTCCCTACAATCCCCAAAGTCAGGGAGTAGTAGAATCCATGAATAAAGAATTAAAGAAGATCATAGGGCAGGTAAGAGATCAAGCTGAACACCTTAAGACAGCAGTACAAATGGCAGTATTCATTCACAATTTTAAAAGAAAAGGGGGGATTGGGGGGTATAGTGCAGGGGAAAGAATAATAGACATAATAGCAACAGACATACAAACTAAGGAATTACAAAAACAAATTATAAAAATTCAAAATTTTCGGGTTTATTACAGAGACAGCAGAGACCCTATTTGGAAAGGACCAGCCAAACTACTCTGGAAAGGTGAAGGAGCAGTAGTGATACAAGATAATAGTGACATAAAGGTAGTACCAAGGAGGAAAGTAAAAATCATTAAGGACTATGGAAAACAGATGGCAGGTGCTGATTGTGTGGCAGGTAGACAGGATGAGGATTAGAACATGGAATAGTTTAGTAAAGCACCATATGTATATTTCAAGAAGAGCTAAGGGATGGTTTTACAGACACCATTATGAAAGCAGACATCCAAAAATAAGTTCAGAAGTACACATCCCATTAGGGGATGCTAGATTAATCATAAAAACATATTGGGGTTTACATACAGGAGAAAGAGAATGGCATTTGGGTCATGGAGTCTCCATAGAATGGAGATTGAGAAAATATAGTACACAAGTAGACCCTGGCCTGGCAGACCAATTAATTCATATGCATTATTTTGATTGTTTTACAGACTCTGCCATAAGGAAAGCCATATTAGGACATATAGTTATTCCTAGGTGTGACTATCAAGCAGGACATAATAAGGTAGGATCTCTACAATACTTGGCACTGACAGCATTAATAAAACCAAGAAAGATAAAGCCACCTCTGCCTAGTGTTAGGAAACTAGTAGAGGATAGATGGAACAAGCCCCAGAAGACCAGGGGCCGCAGAGGGAACCATACAATGAATGGACACTAGAGCTTTTAGAGGAACTCAAGCAAGAAGCTATCAAACATTTTCCTAGACCATGGCTCCATAGCTTAGGACAACATATCTATGAAACCTATGGGGATACCTGGACAGGAGTTGAAGCTCTAATAAGAATACTGCAACAACTGCTGTTTATTCATTTCAGAATTGGGTGCCTGCATAGCAGAATAGGCATTGGGCGACGGAGAGGAGCAAGAAATGGATCCAGTAGATCCTAACCTAGAGCCCTGGAACCATCCAGGAAGTCAGCCTACAACCCCTTGTAATAAGTGCTATTGTAAACACTGTGGCTATCATTGTCTAGTTTGCTTTCAGACAAAAGGCTTAGGCATTTCCTATGGCAGGAAGAAGCGGAGACAGCGACGAAGCGCTCCTCCAAGCAGTGAGGATCATCAAAATCCTATATCAAAGCAGTAAGTACAACATAGCAGATGTAATGTTAGATTTAACAGCAAAAGTAGATTATAGACTAGGAGTAGGAGCACTTATAGTAGCACTAATCATAGCAATAGTTGTGTGGACCATAGCATATATAGAATATAGGAAATTGTTAAGACAAAGAAAAATAGACTGCTTAATTAAAAGAATTAGAGAAAGAGCAGAAGACAGTGGCAATGAGAGTGATGGGGACACGGAGGAATTATCCACGATGGTGGATATGGGGCATCTTAGGCTTTTGGATGTTAATGATTTATAATGTGGGGGGAAACTTGTGGGTCACAGTCTATTATGGGGTACCTGTGTGGAAAGAAGCAAAAACTACTCTATTTTGTGCATCAAATGCTAAAGCATATGAGAGAGAAGTGCATAATGTCTGGGCAACACATGCCTGTGTACCCACAGACCCCAGCCCACAAGAACTGGTTTTGGAAAATGTAACAGAAAACTTTAACATGTGGAAAAATGACATGGTGGATCAGATGCATGAGGATGTAATCAGTTTATGGGATGAAAGCCTAAAGCCATGTGTAAAGTTGACCCCACTCTGTGTCACTTTAAACTGTAGCGATGCTAGGAATAATACTGGCAATGTTGCAATGGATGGTACTAAAGAATTAACAAATTGCTCTTTCAATATGACCACAGTACTAAGAGATAAGAAACAGAAGGTAGTTGCACTTTTTTATAAACTTGATGTAGTACAACTCAGTAGTAACTCTAGTGAGTATAGATTAATAAATTGTAATACCTCAGCCATAACACAAGCCTGTCCAAAGGTCTCTTTTGACCCAATTCCTATACATTATTGTGCTCCAGCTGGTTATGCGATTCTAAAGTGTAATAATAAGACATTCAATGGAACAGGGCCGCGCAATAATGTCAGCACAGTACAATGTACACATGGAATTAAGCCAGTGGTATCAAGTCAACTACTGCTAAACGGTAGCCTAGCAGAAGGAGAGATAATAATTAGATCTGAAAATCTGACAAACAATGTCAAAACAATAATAGTACATCTTAATGAATCTGTAGGAATTAATTGTACAAGACCCAACAATAATACAAGAGAGAGCATAAGGATAGGACCAGGACAAACATTCTATGCAACAGGAGACATAATAGGAGATATAAGACAGGCCCATTGTAACGTTAGTAGAGAGGAATGGAATAAAACTTTACAAAGGATAAGAGAAAAATTAAAGGAACACTTCCATGATAAAAATATAAGCTTTGCACCATCCTCAGGAGGGGACCTAGAAATTACAACACATAGCTTTAATTGTAGAGGAGAATTTTTCTATTGCGATACATCAAGGCTATTTAATGAAAGTCTTAATGAAAGACTGTTTAATGAAAGTAGTGAGTCAAATGACACCATCACACTCCAATGTAGAATAAAACAAATTATAAACATGTGGCAGAAGGTAGGACAAGCAATATATGCCCCTCCCATAAAAGGAAACATATCATGTACATCAAACATCACAGGACTACTATTGACACGTGATGGAGGAAATGATGATGGAGGAAATGATACAGGGTCAAGGCCAGAGACATTCAGACCTGGAGGAGGAGATATGAGGGACAATTGGAGAAGTGAATTATATAAATATAAAGTGGTAGAAATTAAGCCATTAGGAATAGCACCCACTGCGGCAAAAAGAAGAGTGGTGGAGAGAGAAAAAAGAGCAGTGGGAATAGGAGCTGTGTTCCTTGGGTTCTTGGGAGCAGCAGGAAGCACTATGGGCGCGGCGTCAATAACGCTGACGGTACAGGCCAGACAACTATTGTCTGGTATAGTGCAACAGCAAAGCAATTTGCTGAGAGCTATAGAGGCGCAACAGCATATGTTGCAACTCACGGTCTGGGGCATTAAGCAGCTCCAGGCAAGAGTCCTGGCTATAGAAAGATACCTAAAGGATCAACAGCTCCTAGGGATTTGGGGCTGCTCTGGAAAACTCATCTGCACCACTAATGTGCCTTGGAACTCTAGTTGGAGTACTAAAACTCAGGAAGAGATTTGGAATAACATGACCTGGATGCAGTGGGATAGAGAAATTAATAATTACACGAACACAATATACAAGTTGCTTGAAGACTCGCAAAACCAGCAGGAAAAGAATGAACAAGATTTATTAGCATTGGACAAGTGGGAAAATCTGTGGAATTGGTTTAACATAACTCACTGGCTGTGGTATATAAAAATATTCATAATGATAATAGGAGGTTTGATAGGTCTAAGAATAATTTTTGCTGTACTTTCTATAGTAAATAGAGTTAGGCAGGGATACTCACCTTTGTCATTTCAGACCCTTATCCCAAACCCGAGGGGACCCGACAGGCTCGGAGGAATCGAAGAAGAAGGTGGAGAGCAAGACAGAGACAGATCCGTGAGATTAGTGAGCGGATTCTTAGCACTTGCCTGGGACGATCTGCGGAGCCTGTGCCTCTTCAGCTACCACCGATTGAGAGACTTCATATTGGTGACGGCGAGAGCAGTGGAACTTCTGGGACGCAACAGTCTCAGGGGACTACAGTACCTGGGGGGTCTTGTACAGTATTGGGGTCTTGAGCTAAAAAAGAGTGCTATTAATCTGCTTGATACCATAGCAATAGCAATAGCTGAAGGAACAGATAGGATCATAGAACTCATAAGGGGAATTTGCAGAGCTATCCGCAACATACCTAGAAGAATAAGACAAGGCTTTGAAACAGCTTTAGTATAAAATGGGGGGCAAGTGGTCAAAAAGCAGTATAGTTGGGTGGCCTGCTGTAAGAGAAAGAATAAGAAGAACTGAGCCAGCAGCAGAGAGAACAAGAAGAACTGAGCCAGCAGCAGAGGGAGTAGGAGCAGCGTCTCAAGACTTAGATAAACATGGGGCACTTACAAGCAGCAACACACCCGCCAATAATGCTGATTGTGCCTGGCTAGAAGCGCAAGAGGAGGAAAATGAGGTAGGCTTTCCAGTCAGACCTCAGGTGCCTTTAAGACCAATGACTTACAAGGGAGCATTTAATCTCAGCTTCTTTTTAAAAGAAAAGGGGGGACTGGATGGGTTAATTTACTCTAAGAAAAGGCAAGAGATCCTTGATTTGTGGGTCTATAACACACAAGGCTACTTCCCTGATTGGCAAAACTACACACCGGGACCAGGGGTCAGACATCCACTGACCTTTGGATGGTGCTACAAGCTAGTGCCAGTTGACCCAGGGGAAGTAGAGGAGGCCAATGAAGGAGAGAATAACTGTTTGCTACACCCTATAAGCCAGCATGGAATGGAGGATGAAGACAGAGAAGTATTAAAATGGAAGTTTGACAGTCACCTAGCATGCAGACACATGGCCCGCGAGCTACATCCGGAGTATTACAAAGACTGCTGACACAGAAGGGACTTTCCGCTGGGACTTTCCACTGGGGCGTGCCAGGAGGAGTGGTCTGGGCGGGACTGGGAGTGGCCTACCCTCAGATGCTGCATATAAGCAGCTGCTTTTCGCCTGTACTGGGTCTCTCTAGGTAGACCAGATCTGAGCCTGGGAGCTCTCTGGCTACTTGGGGAACCCACTGCT
>C.ZA.04.SK134B1_AY703909_G.NG.01.01NGPL0669_DQ168576
TCTGTTGTGTGACTCTGGTAACTAGAGATCCCTCAGACCCTTTGTGGTAGTGTGGAAAATCTCTAGCAGTGGCGCCCGAACAGGGACGCGAAAGCGAAAGTAAGACCAGAGGAGATCTCTCGACGCAGGACTCGGCTTGCTGAAGTGCACACGGCAAGAGGCGAGAGCGGCGGCTGGTGAGTACGCCATTTTTATTTGACTAGCGGAGGCTAGAAGGAGAGAGATGGGTGCGAGAGCGTCAATATTAAGAGGCGGAAAATTAGATACATGGGAAAGAATTAGGTTAAGGCCAGGAGGAAAGAAAACTTATATGATAAAGCACATAGTATGGGCAAGCAGGGAGCTGGACAGATTTGCACTTAACCCTGGCCTTTTAGAGACAGCAGACGGCTGTAAACAAATAATACAACAGCTTGATCCAGCTCTCAAGACAGGAACAGAGGAACTTAGATCATTATACAACACAGTAGCAACTCTCTATTGTGTACATAAAGGGATAGATGTAAAAGACACCAAGGAAGCCTTAGACAAGATAGAGGAAGGACAAAACAAATGTCAGCAAAAAACAAAGCAGGCAGAAGCGGCTGCGGCTGCCGAAAAGGTCAGTCAAAATTACCCTATAGTACAGAATCTACAAGGGCAAATGGTACACCAAGCCATATCACCTAGAACCTTGAATGCATGGGTAAAAGTAATAGAAGAGAAGGGCTTTAGCCCCGAGGTAATACCCATGTTTACAGCATTATCAGAAGGAGCCACCCCACAAGATTTAAACACCATGTTAAATACAGTGGGGGGACATCAAGCAGCCATGCAAATGTTAAAGGATACCATCAATGAGGAGGCTGCAGATTGGGATAGATTACATCCAGTACATGCAGGGCCTGCTGCACCAGGCCAAATGAGAGAACCAAGGGGAAGTGACATAGCAGGAACTACTAGTACCCTTCAGGAACAAATAGGATGGATGACAAGCAACCCACCAATTCCAGTGGGAGAAATCTATAAAAGATGGATAATTCTGGGGTTAAATAAGATAGTAAGAATGTATAGCCCTGTCAGCGTTTTGGACATCAAACAAGGGCCAAAGGAACCCTTTAGAGACTATGTAGATCGGTTCTTTAAAACTTTAAGAGCTGAACAAGCTACACAAGATGTAAAGAATTGGATGACAGAAACCTTGTTGGTCCAAAATGCAAACCCAGATTGTAAGACCATTTTAAGAGCATTAGGACAAGGGGCTACATTAGAAGAAATGATGACAGCATGTCAAGGAGTGGGAGGACCTAGCCACAAAGCAAGAGTGTTGGCTGAGGCAATGAGCCAAGCAAACAATACAAACATAATGATGCAAAGAGGCAATTTCAAGGGCCAGAAAAGAAGTATTAAATGTTTCAACTGTGGCAAGGAAGGGCACATAGCCAGAAATTGCAGGGCTCCTAGAAAAAAGGGCTGTTGGAAATGTGGAAAGGAAGGACACCAGATGAAAGACTGTACTGAAAGACAGGCTAATTTTTTAGGGAAAATCTGGCCTTCCCACAAGGGGAGGCCAGGGAATTTCCTTCGGGGCAGGCCAGAGCCAACAGCCCCACCAGCAGAGAGCTTCAGGTTCGAGGAGACAACCCCCGCTCCGAAGCAGGAGCCGAAAGACAGGGAACCCTACAAGGAACCCTTAACTGCCCTCAAATCACTCTTTGGCAGCGACCCCTTGTCTCAATAAAAGTAGGGGGCCAGATAAAGGAGGCTCTCTTAGACACAGGAGCAGATGATACAGTATTAGAAGAAATAAGTTTGCCAGGAAAACGGAAACCAAAAATGATAGGGGGAATTGGAGGTTTTATCAAAGTAAGACAGTATGATGAAATACTTATAGAAATTTGTGGAAAAAAGGCTATAGGTACAGTATTAGTAGGACCTACACCTGTCAACATAATTGGAAGAAATATGTTGACTCAGCTTGGCTGCACTCTAAATTTTCCAATCAGTCCTATTGAAACTGTACCAGTAAAATTAAAACCAGGAATGGATGGGCCAAAGGTTAAACAATGGCCATTGACAGAAGAAAAAATAAAAGCATTAACAGAAATTTGTACAGAAATGGAAAAGGAAGGAAAAATTTCAAAAATTGGGCCTGAAAACCCATATAATACTCCAGTATTTGCCATAAAAAAGAAGGACAGTACTAAATGGAGAAAATTAGTAGATTTCAGGGAACTTAATAAAAGAACCCAAGACTTCTGGGAGGTTCAATTAGGAATACCACACCCAGCAGGGTTAAAAAAGAAAAAATCAGTAACAGTATTGGATGTGGGGGATGCATATTTTTCAGTTCCTTTAGATGAAAGTTTTAGGAAATACACTGCATTCACCATACCTAGTATAAACAATGAGACACCAGGGATTAGATATCAATATAATGTGCTTCCACAGGGATGGAAAGGATCACCAGCAATATTCCAGAGTAGCATGACAAAAATCTTAGAGCCCTTTAGGGCACAAAATCCAGACATAGTCATCTATCAATATATGGATGATTTATATGTAGGATCTGACTTAGAAATAGGGCAGCATAGAGCAAAAATAGAAGAGTTGAGAAATCATCTACTGAGATGGGGATTTACCACACCAGATAAAAAACATCAGAAAGAACCTCCATTCCTTTGGATGGGATATGAGCTCCATCCTGATAAATGGACGGTACAACCTATACAGCTGCCAGATAAGGAAAACTGGTCTGTCAATGATCTACAGAAGTTAGTGGGGAAATTAAACTGGGCAAGTCAGATTTACCCAGGGATTCAAGTAAGGCAAATTTGTAAACTCCTTAGGGGAGCCAAAGCACTAACAGACATAGTACCACTGACTGAAGAAGCAGAATTAGAATTGGCAGAGAACAGGGAAATTCTAAAAGAACCAGTACATGGAGTATATTATGACCCATCAAAAGACTTGATAGCTGAAATACAGAAACAGGGACAAGATCAGTGGACATATCAAATTTACCAAGAACCATTCAAGAATCTAAAAACAGGAAAGTATGCAAAAATGAGGACTGCCCACACTAATGATGTAAAACAGTTAACAGAGGCAGTGCAGAAAATAGCCAAGGAAAGCATAGTAATATGGGGAAAGATTCCTAAATTTAGACTACCCATCCAAAAAGAAACATGGGAGACATGGTGGACAGACTATTGGCAAGCCACCTGGATTCCTGAGTGGGAGTTTGTTAATACCCCTCCCCTAGTAAAACTATGGTACCAGCTAGAAAAAGAACCCATAGTTGGAGCAGAAACTTTCTATGTAGATGGAGCAGCTAATAGGGAAACTAAAGCAGGAAAAGCAGGATATGTTACTGACAGAGGAAGGCAAAAAGTTATGACTCTAACTGAAACAACAAATCAGAAGTCTGAATTACAAGCAATTCAGCTAGCTTTGCAAGATTCAGGATCGGAAGTAAACATAGTAACAGACTCACAATATGCATTAGGAATCATACAAGCACAACCAGATAAGAGTGAGTCAGAGTTAGTCAACCAAATAATAGAACAGTTAATAAAGAAAGAAAGGATCTACCTGTCATGGGTCCCAGCACATAAAGGGATTGGAGGAAATGAACAAGTAGATAAATTAGTAAGTAGTGGAATCAGGAAAGTGCTATTTCTAGATGGAATAGATAAAGCTCAAGAAGAGCATGAAAAGTATCACAACAATTGGAGAGCAATGGCTGGTGAGTTTAATCTACCACCTGTAGTAGCAAAAGAAATAGTAGCTTGCTGTGATAAGTGCCAGCTAAAAGGGGAAGCCATACATGGACAAGTGGATTGTAGTCCAGGAATATGGCAATTAGATTGTACACATCTAGAAGGAAAAGTCATCCTGGTAGCAGTCCACGTAGCCAGTGGCTATATAGAAGCAGAAGTTATCCCAGCAGAAACAGGACAGGAAACAGCATACTATATACTAAAATTAGCAGGAAGATGGCCAGTCAAAGTAATACATACAGACAATGGCAGCAATTTCACCAGTGCTGCAGTTAAGGCAGCCTGCTGGTGGGCAGGTATCCAACAGGAATTTGGAATTCCCTACAATCCCCAAAGTCAGGGAGTAGTAGAATCTATGAATAAAGAGTTAAAGAAAATCATAGGGCAGGTAAGAGAGCAAGCTGAGCACCTTAAGACAGCAGTACAAATGGCAGTATTCATTCACAATTTTAAAAGAAAAGGGGGGATTGGGGGGTACAGTGCAGGGGAAAGAATAATAGATATAATAGCAACAGACATACAAACTAAAGAACTACAAAAACAAATTACAAAAATTCAAAATTTTCGGGTTTATTACAGAGACAGCAGAGACCCTATTTGGAAAGGACCAGCCAAACTACTCTGGAAAGGTGAAGGGGCAGTAGTAATACAAGAAAACAGTGACATAAAGGTAGTACCAAGGAGGAAAGCAAAGATCATTAGGGAATATGGAAAACAGATGGCAGGTGCTGATTGTGTGGCAGGTAGACAGGATGAGGATCAGAACATGGAACAGTCTAGTGAAGCATCATATGTATGTTTCAAAGAGAGCTAGTGGATGGTTTTACAGACATCATTATGAAAGCAGACATCCAAAAATAAGCTCAGAAGTACACATCCCAGTAGGGGAAGCTAGATTAGTAATAACAACATATTGGGGTCTACAAACAGGAGAAAGAGAATGGCATTTGGGTCATGGAGCCTCCATAGAATGGAGACTGAGAAGATATAGCACACAAGTAGACCCTGGCCTGGCAGACCAGCTAATCCATATGCACTATTTTGATTGTTTTGCAGAATCTGCCATAAGACAAGCCATATTAGGACACATAGTTTATCCCAGGTGTGACTATCCAGCAGGACATAATCAGGTAGGATCTCTACAGTACTTGGCACTGACAGCATTGATAAAACCAAAAAGAATAAAGCCACCTCTGCCTAGTACTAGAAAATTAGTAGAAGATAGATGGAACAAGCCCCAGAAGACCAGGGGCCGCAGAGGGAACCATACAATGAATGGGCACTAGAGATTCTAGAGGATCTCAAGCAGGAAGCTGTCAGACACTTCCCTAGAGTGTGGCTTCATGGCTTAGGACAATATATCTATGAAACCTATGGGGATACTTGGACAGGAGTCGAGGTTCTAATAAGAACACTGCAACAACTACTGTTTATTCATTTCAGAATTGGGTGCCAGCATAGCAGAATAGGCATTTTACAACAGAGAAGAGCAAGAAATGGAGCCAGTAGATCCTAACCTAGAGCCCTGGAAGCACCCGGGAAGTCAGCCTAAAACTCCCTGTACTCCTTGTTATTGTAAAAAATGCAGCTATCATTGTCTAGTTTGCTTTCAGAAAAAAGGCTTAGGCATTTACTATGGCAGGAAGAAGCGGAGACAGCGACGAAGCGCTCCTCCAAGCAATAAGGATCATCAGAATCCTGTATCAAAGCAGTAAGTACCATATAGTGGATGTAATGTTAAATTTACTGGCAAGAGTAGATTATAGAATAGGAATAGCAGCATTTATAGTAGCACTAATTATAGCAATAATTGTGTGGACCATAGTATATATAGAATATAGGAAACTAGTAAAACAAAGAAAAATAGACAGGTTAATTAAAAGAATTAGGGAAAGAGAAGAAGACAGTGGCAATGAGAGTGAGGGGGATATTGAGGAATTGGCAACAATGGGGGATATGGGGCATCTTAGGCTTTTGGATGGTGTGTAGTGTGATGGGGAACTTGTGGGTCACAGTCTATTATGGAGTACCTGTATGGAAAGAAGCAAAAACTACTCTATTCTGTGCATCAGATGCCAAAGCATATGAAAAGGAAGTACATAATGTCTGGGCTATACATGCCTGTGTACCCACAGACCCCAACCCACAAGAAATACTTTTGGTAAATGTAACAGAAAATTTTAACATGTGGAAAAATGACATGGTAGATCAGATGCATGAAGATATAATTAGTCTATGGGATCAAAGCCTAAAGCCATGTGTAAAGTTGACCCCACTCTGTGTCACTCTAAATTGTACTAATGTTAATAATAGTACCAGTAATGGTACTGCTACCTACAATGGTACCAGGTGGGAAGAAATGAAAAATTGCTCTTTCAATATAACCACAGAACTAAGAGATAAGAGAAAGAATGTGTATGCACTTTTTTATAAACTTGATATAGTGTCACTTGAGAGTAACAACTCTAACGAGTATAGATTAATAAATTGTAATACCTCAACCATATCACAAGCCTGTCCAAAGATCAGTTTTGACCCAATTCCTATACATTATTGTGCTCCAGCTGGTTATGCGATTCTAAAGTGTAATAATAAGGCATTCAATGGGAAAGGGCCATGCAACAATGTTAGCACAGTACAATGTACACATGGAATTAAGCCAGTGGTATCAACTCAACTACTGTTAAATGGTAGCCTAGCAGAAGAAGATATAATAATCAGATCTGAAAATCTGACAAACAATGCCAAAATAATAATAGTACATCTTAATGAATCTGTAACAATTAATTGTACAAGACCTGGCAATAATACAAGACAAAGTATAAGGATAGGACCAGGACAAACATTTTATGCAACAGGAGACATAATAGGAGACATAAGACAAGCATACTGTAACATTAGTGGTAGTGAATGGAATAAAACTATAGAAAGGGTAGAGAACAAATTACAAACACTCTTCAATAAGACAATCAAATTTAATTCATCCGCAGGAGGGGACCTAGAAGTTACATCACATACCTTTAATTGTGGAGGAGAATTTTTCTATTGCAATACATCAAAACTGTTTAATAATAATAAGACAGAATGGAATTCAACCATCATACTGCCATGCAGAATAAAACAAATTATAAACATGTGGCAGGAGGTAGGAAGAGCAATATATGCCCCTCCCATTGCAGGAAACATAACATGTATATCAAATATCACAGGACTACTATTGGAACGGGATGGAGGAGATAATTCAACAGAGAATGGCACAGAGATATTCAGACCTATAGGAGGAGATATGAGGAACAATTGGAGAAGTGAATTATATAAATATAAAGTGGTAGAAATTAAGCCACTGGGAGTAGCACCCACTAAGGCAAAAAGGAGAGTGGTGGAGAGAGAAAAAAGAGCAGTGGGACTAGGAGCTTTGTTCCTTGGGTTCTTGGGAGCAGCAGGAAGCACTATGGGCGCAGCATCAATAACGCTGACGGTACAGGCCAGACAAGTGCTGTCTGGAATAGTGCAACAGCAAAGCAATTTGCTGAGAGCTGTAGAGGCGCAACAGCATATGTTGCAACTCACTGTCTGGGGCATTAAACAACTCCAGACAAGAGTCCTGGCTATAGAAAGATACCTAAAGGATCAACAGCTCCTAGGGTTGTGGGGCTGCTTTGGAAAACTCATCTGCACCACTGCTGTGCCCTGGAATGCCAGTTGGAGTAATAAATCTCAAGATGATATTTGGAATAACATGACCTGGATGCAGTGGGATAGAGAAATTGATAATTACACAGGAACAATATACAGGTTGCTTCAAGACTCGCAAATCCAGCAGGAGAAAAATGAAAAAGATTTATTAGCATTGGACAGTTGGGCAAATCTGTGGAATTGGTTCGACATAACAAATTGGCTGTGGTATATAAAAATATTTATAATGATAGTAGGAGGCTTGATAGGTTTGAGAATAATTTTTGCTGTGCTTTCTATAGTGAATAGAGCTAGGCAGGGATACTCACCTCTGTCGTTGCAGACCCTTCCCCCGAACCCAAGGGAACTCGACAGGCTCGGAAGAATCGAAGAAGGAGGTGGAGAGCAAGACAGAGACAGATCAATTCGATTGCTGAACGGATTCTTAGCGATTGCCTGGGACGATCTGCGGAGCCTGTGCCTTTTCAGCCACCACCGATTGAGAGACTTCATCTTGATTGCAGCGAGAGTACTGGAGCTTCTGGGACGCAGGGGGTGGGAAATCCTTAAGTATCTGGGAGGTCTTGCTCAGTATTGGGGTCTGGAACTAAAAAAGAGTGCTATTAGCTTGCTTGATGCCATAGCAATAGCAACAGCTGAGGGAACAGATAGGATTATAGAATTAATACTAAGAATTTGTAGAGCTATCCGCAACGTACCTACTAGAATAAGACAGGGCTTTGAAGCAGCTTTGCTATAAAATGGGGAACAAGTGGTCAAAAAGCTGGCCTGCTGTAAGAGAAAGAATAAGAAAAACCGAACCAGTAGCAGAGGGTGTAGGAGCAGCAGCAGAGGGAGTAGGAGCAGCATCTCAAGACTTAGCTAAACATGGAGCATTTACAACCAGTAACACAGTCACCAATAATGCTGCTTGTGCCTGGGTGGAAGCACAAGAGGAGGGAGAGGAAGTAGGCTTTCCAGTCAAGCCTCAAGTACCTTTAAGGCCAATGACTTATAAAGCAGCATTTGACCTCGGCTTCTTTTTAAAAGAAAAGGGGGGACTGGATGGGTTAATTTACTCCCAGAAAAGGCAAGATATCCTTGATTTGTGGGTCTATCACACACAAGGTTACTTCCCTGATTGGCAAAACTACACACCGGGACCAGGGGTCAAATATCCACTGACCTTTGGCTGGCCCTTCAAACTAGTGCCAGTTGACCCAAGGGAAGTAGAAGAGGCCAACAAAGATGAGAACAACTGTTTGCTACACCCAATGAGCCAGCGTGGAGCGGAAGATGCAGACAGAGAAGTGCTGATATGGAAGTTTGACAGCAGCCTAGCACGCAGACACATGGCCCGCGAGCTATATCCGGAGTATTACAAGAACTGCTGACACAGAAGGGACTTTCCGTTGGGACTTTCCACTGGGGCGTTCCAGGAGGAGTGGTCTGGGCGGGACGGGGAGTGGTCAACCCTCAATTGCTGCATATAAGCAGCCGCTTTTCGCCTGTACTGGGTCTCTCTAGGTAGACCAGATCTGAGCCTGAGAGCTCTCTGGCTGTCTAGGGAACCCACTGCTTAAGCCTCAATA
>C.ZA.00.1214MB_AY463236_H.BE.93.VI991_AF190127
AGTAGTGTGTGCCCGTCTGTTGTGTGACTCTGGTAACTAGAGATCCCTCAGACCATTCGTGGTAGTGTGGAAAATCTCTAGCAGTGGCGCCCGAACAGGGACTTGAAAGTGAAAGTAAGACCAGAGGAAATCTCTCGACGCAGGACTCGGCTTGCTGAAGTGCACTCGGCAAGAGGCGAGAGCGGCGGCTGGTGAGTACGCCAAAATTTATTTGACTAGCGGAGGCTAGAAGGAGAGAGATGGGTGCGAGAGCGTCAATACTAAGAGGGGGGAAATTAGATACATGGGAAAAAATCAGGTTAAGGCCAGGGGGAAAGAAACGTTACAGGCTAAAACACCTAGTATGGGCAAGCAGGGAGCTGGAAAGATTTGCACTTAACCCTGGCCTTTTAGAGACAGCAGACGGCTGTAAACAAATAATACAACAGCTACAACCAGCTCTTCAGACAGGAACAGAGGAACTTAAATCATTATTTAACACAGTAGCAACTCTCTATTGTGTACATGCAAAGATAGAGGTAAAAGGCACCAAGGAAGCCTTAGACAAGATAGAGAAAGAACAACGCAAAAGTCAGCAAAAAACACAGCAAGCGGAAGCGGCTGACAGAGGACAGAGTAGTCAAAATTATCCTATAGTGCAGAATCTCCAAGGGCAAATGGTACACCAGGCCATATCACCAAGAACTTTGAATGCATGGGTAAAAGTGATAGAAGAGAAGGCTTTCAGCCCAGAGGTAATACCCATGTTTACGGCATTATCAGAAGGAGCTACCTCACAAGATTTAAACACCATGTTAAATACAGTGGGGGGACATCAAGCAGCCATGCAAATGTTAAAAGATACCATCAATGAGGAGGCTGCAGAATGGGATAGGTTACATCCAGTACATGCAGGGCCTATTGCACCAGGCCAAATGAGAGAACCAAGGGGAGGTGACATAGCAGGAACTACTAGTACCCTTCAGGAACAAATAGCATGGATGACAAGTAACCCACCTATTCCAGTAGGAGACATCTATAAAAGATGGATAATTCTGGGGTTAAATAAAATAGTAAGAATGTATAGTCCTGTCAGCATTTTGGACATAAAACAAGGGCCAAAGGAACCCTTTAGAGACTATGTAGACCGGTTCTTTAAAACTTTAAGAGCTGAACAATCCACACAAGAGGTAAAAAATTGGATGACAGACACCTTGTTGGTCCAAAATGCGAACCCAGATTGTAAGACCATTTTAAGAGCATTAGGACCAGCGGCTTCATTAGAAGAAATGATGACAGCATGCCAAGGAGTGGGAGGACCTAGCCACAAAGCAAGAGTTTTAGCTGAGGCAATGAGCCAAGCAGGCAATACAAATATAATGATGCAGAGAGGCAACTTTAAAGGCCCTAGAAGAATTATCAAATGTTTCAACTGTGGCAAGGAAGGGCACATAGCCAGAAATTGCAAGGCCCCTAGGAAAAAAGGCTGTTGGAAATGTGGAAAGGAAGGACACCAAATGAAAGATTGTACTGAGAGACAGGCTAATTTTTTAGGGAAAATTTGGCCTTCCAAGGGAAGGCCAGGGAATTTCCTTCAGAGCAGACCAGAGCCAACAGCCCCACCAGCAGAGAGCTTCAGGTTCGAGGAGACAACCCCTGCTCCGAAGCAGGAGCAGAAAGACAAGGAGCCACCCTTAGCTTCCCTCAAATCACTCTTTGGCAACGACCCCTTGTCTCAATAAAAGTAGGGGGTCAGACAAAGGAAGCCCTCTTAGATACAGGAGCAGATGATACAGTATTAGAAGACATAAATTTGCCAGGAAAATGGAAACCAAAAGTGATAGGAGGAATTGGAGGTTTTATCAAAGTAAGGCAGTATGATCAAATAGTTATAGAAATTTGTGGAAAAAAGGCTATAGGTTCAGTATTAGTGGGACCTACACCTGTCAACATAATTGGAAGAAATATGTTGACTCAGCTTGGATGCACACTAAATTTTCCAATTAGTCCCATTGAAACTGTACCAGTGAAATTAAAGCCAGGAATGGATGGCCCAAAAGTTAAACAATGGCCATTGACAGAAGAAAAAATAAAAGCATTAACAGCAATTTGCGAAGAAATGGAGAAGGAAGGAAAAATTACAAAAATTGGGCCTGAAAATCCATATAATACTCCAGTATTTGCCATAAAAAAGAAGGACAGTACTAAGTGGAGAAAATTAGTAGATTTCAGGGAACTCAATAAAAGAACTCAGGACTTTTGGGAAGTTCAATTAGGAATACCACACCCAGCAGGGTTAAAACAGAAAAAATCAGTGACAGTACTAGATGTGGGGGATGCATATTTTTCAGTTCCTTTAGATGAGAATTTCAGGAAGTACACTGCATTCACCATACCTAGTATAAACAATGAAACACCAGGAATTAGATATCAATATAATGTGCTTCCACAAGGATGGAAAGGATCACCAGCAATATTCCAAAGTAGCATGACAAAAATCTTAGAGCCCTTTAGGACAAGAAACCCAGACATAGTTATCTATCAATATATGGATGACTTGTATGTAGGATCTGACTTAGAAATAGGGCAACATAGAGCAAAAATAGAGGAGTTAAGAGAACATTTATTGAAATGGGGACTCACCACTCCAGACAAGAAACATCAAAAAGAGCCCCCATTTCTGTGGATGGGGTATGAACTCCATCCTGATAAGTGGACAGTACAGCCTATACATCTGCCAGAAAAAGAGAGCTGGACTGTCAATGATATACAGAAGTTAGTGGGAAAATTAAACTGGGCGAGTCAGATTTACGCAGGGATTAAAGTAAAACAACTATGTAAGCTCATTAGAGGAACCAAAGCACTAACAGACATAGTACCACTGACTGAAGAGGCAGAATTAGAATTGGCAGAAAACAGGGAAATTCTAAAAGAACCAGTACATGGAGTATATTATGATCCATCAAAAGACTTAATAGCTGAACTACAGAAACAGGGACATGACCAGTGGACATATCAAATTTACCAAGAACCATTTAAAAATCTGAAAACAGGGAAGTATGCAAGAATGAGGACTGCCCACACTAATGATGTAAAACAGTTAACAGAGGCAGTGCAAAAGATAACTATGGAAAGTATAGTAATATGGGGAAAGACTCCTAAATTTAGACTACCCATCCAAAAAGACACATGGGAGACATGGTGGACAGACTATTGGCAAGCCACCTGGATTCCTGAGTGGGAGTTTGTTAATACCCCTCCCCTAGTAAAACTATGGTACCAGCTAGAGAAGGAACCCATAGCAGGAGCAGAAACTTTCTATGTAGATGGAGCAGCTAATAGGGATACTAAAATAGGAAAAGCAGGGTATGTTACTGACAGAGGAAGACAGAAAATTGTTCCTCTAACTGAAACAACAAATCAGAAGACTGAACTGCAAGCAATTCAGATAGCTTTGCAGGATTCAGGACCAGAAGTAAACATAGTAACAGATTCACAGTATGCATTAGGCATCATTCACGGACTACCAGATAAGAGTGAATCAGAGTTAGTTAATCAAATAATAGAACAATTGATAAACAAGGAAAGAGTCTACCTGTCATGGGTACCAGCACATAAAGGAATTGGAGGAAATGAGCAAGTAGACAAATTAGTAAGTAGGGGAATTAGAAAAGTGCTGTTTCTAGATGGGATAGATAAGGCTCAAGAAGACCATGAAAAACATCACAGCAATTGGAGAGCAATGGCTAATGAGTTTAATCTGCCACCCATAGTAGCAAAAGAAATAGTAGCTAGCTGTGATAAATGTCAGATAAAAGGGGAAGCCATGCATGGACAAGTAGACTGTAGTCCAGGGATATGGCAATTAGATTGTACACATTTAGAAGGAAAAGTCATTCTGGTAGCAGTCCATGTAGCCAGTGGCTACATAGAAGCAGAGGTATTCCAGCAGAAACAGGACAAGAAACAGCATACTATATACTAAAATTAGCAGGAAGATGGCCAGTCAAAGTAATACACACAGACAATGGCAGTAATTTCACCAGTACTGCAGTAAAGGCAGCTCTGTTGGTGGGCAGGTATCCAACAGGAATTTGGGATTCCCTACAATCCCCAAAGTCAGGGAGTGGTAGAATCCATGAATAAAGAATTGAAGAAAATCATAGGGCAAGTAAGAGATCAAGCTGAGCACCTTAAGACAGCAGTACAAATGGCAGTATTCATTCACAATTTTAAAAGAAAAGGGGGGATTGGGGGGTACAGTGCAGGGGAAAGAATAATAGACATGATAGCAACAGACATACAAACTAAAGAATTACAAAAACAAATCATAAAAATTCAAAATTTTCGGGTTTATTACAGAGACAGCAGAGACCCTATTTGGAAAGGACCAGCCAAACTACTCTGGAAAGGTGAAGGGGCAGTAGTTATACAAGATAGCAGTGACATAAAGGTGGTACCAAGGAGGAAAGTAAAAATCATTAAGGACTATGGAAAACAGATGGCAGGTGCTGATTGTGTGGCAAGTAGACAGGATGAAGATTAGAACATGGAATAGTTTAGTAAAGCACCATATGTATATTTCAAGGAAAGCTAAGGGATGGTTTTACAGACATCATTATGAAAGCAGGCATCCAAAAGTAAGTTCAGAAGTACACATCCCATTAGGGGATGCTAGATTAGTAATAAAAACATATTGGGGTTTGCAGACAGGAGAAAGAGAGTGGCATTTGGGTCATGGAGTCTCCATAGAATGGAGATGGAAAAGATATAGCACACAGGTAGACCCTGGCCTGGCAGACCAACTAATTCATATGCATTATTTTGATTGTTTTGCAGACTCTGCCATAAGACAAGCCATCTTAGGACATATAGTTAGCCCTAGGTGTAACTATCAAGCAGGACATAACAAGGTAGGATCTCTACAATACTTGGCACTGACAGCATTGATCAAGCCAAAAAAGATAAAGCCACCTCTGCCTAGTGTTCAGAAATTGGTAGAGGATAGATGGAACAAGCCCCAGAAGACCAGGGGCCGCAGAGGGAACCATACAATGAATGGGCACTAGAGCTTTTAGAAGATCTTAAGCAGGAAGCTGTCAGACACTTTCCTAGACCATGGCTCCATAGCTTAGGACAGCACATCTATGAAACCTATGGGGATACTTGGACGGGAGTCGAAGTGATAATAAGAATTCTGCAACAATTACTGTTTATTCATTTCAGAATTGGGTGCCAGCATAGCAGAATAGGCATTTTGCGACAAAGAAGAGCAAGAAATGGAGCCAATAGATCCTAAACTAGAACCCTGGAAACATCCAGGGAGTCAGCCTAAAACTGCTTGCAATAGGTGTTATTGCAAACGCTGCTGCTATCATTGTCTAGTTTGCTTTCAGACAAAAGGCTTAGGCATTTCCTATGGCAGGAAGAAGCGGAGACAGCGACGAAGCGCTCCTCCAAGCAGTGAAGATCATCAAGATCCTATACCAAAGCAGTAAGTACTAAATGGTAGATGTAATGTTAAATTTACTAGCAAGAGTAGATTATAGATTAGGAGTAGGAGCATTGATAGTAGCACTAATTATAGCAATAGTTGTGTGGATCATAGCATATATAGAATATAAGAAACTGGTAAGGCAGAGAAGAATAGACAAGCTAGTTGAAAGAATTAGGGAAAGAGAAGAAGACAGTGGCAATGAGAGTGATGGGGATGTTGAGGAATTGTCAACAATGGTGGATATGGAGCATCTTAGGCTTATGGATGTTAATAATTTGTAATGGGGACAATTTGTGGGTCACTGTCTACTATGGGGTACCTGTGTGGAAAGAAGCACAAACTACTCTATTTTGTGCATCAGATGCTAAAGGATATGAAAAAGAAGTGCATAATGTCTGGGCTACACATGCTTGTGTACCCACAGACCCCAACCCACAAGAAATGGTTTTGGCAAATGTAACAGAAAATTTTAATATGTGGAAAAATGACATGGTAGATCAGATGCATGAGGATATAATCAGTTTATGGGATCAAAGCTTAAAGCCATGTGTAAAGTTGACCCCACTCTGCGTCACTTTAAACTGTACTAATGTCACCTGTACTGATAACAGCACCTGTAAGGGTAACACAAGTGAAATAAAAAATTGCTCTTTCGACACAACCTCAGAAATGGAAGATAAGAAGAAAAGACAGAATGCACTTTTCTATGCACTTGATATAGTCCCACTTAATAACGGTGAAAGAAATAAAAGTGATAATCATTATAGGCTAATAAATTGTAATACCTCGGTCATTAAACAAGCTTGCCCAAAGGTGTCCTTTGAACCAATTCCCATACATTATTGTGCTCCAGCTGGTTTTGCGATTCTAAAGTGCAATGGGAAAAAATTTAATGGAACAGGACCATGCACAAATGTCAGCACAGTACAATGCACACATGGAATTAAGCCAGTGGTATCAACTCAGCTACTGTTAAATGGCAGCCTAGCAGAAGAAGAGATAATAATTAGATCTGAAAATATTACAGACAATGTCAAAACAATAATAGTACACCTTAAGGATGCTGTAGAAATTGTGTGTATAAGACCCGGCAATAATACAAGAACCAGTGTGAGGATAGGCCCAGGACAGACATTCTATGCAACAGGAGACATAATAGGAGATATACGACAAGCACATTGTAACATTACTGAAAGCAAGTGGAATAACACTTTAAAAAAGGTAACAGGAAAATTAGGAGAATACTTCCCTAATCGAACAATACAATTTGCACCATCCTCAGGAGGAGATTTAGAAATTACAACACATAGCTTTAATTGTGGAGGAGAATTTTTCTATTGCGATACAGCAGCCCTGTTTAATGGCACATATAATGGCACATATGGTAATGAGACTTCAAACATCACACTCCAATGCAGAATAAAACAGATGATAAACATGTGGCAGGGGGTAGGACGAGCAATGTATGCTCCTCCCATTGCAGGAAACATAACATGTAGATCGAATATCACAGGACTACTATTGACACGTGATGGAAGTAACGATACTGGGCCAGAGATATTCAGACCTGGAGGAGGAAATATGAAGGACAATTGGAGAAGTGAATTATATAAATACAAAGTGGTAGAAATTAAGCCATTAGGAATAGCACCCACTAAAGCAAAAAGGAGAGTGGTGGAGAGAGAGAAAAGAGCAGTGGGAATAGGAGCTGTGTTCCTTGGGTTCTTAGGAGCAGCAGGAAGCACTATGGGCGCAGCATCAATAACGCTGACGGTACAGGCCAGACAATTATTGTCTGGTATAGTGCAACAGCAAAGCAATTTGCTGAGAGCTATAGAGGCGCAACAGCATATGTTGCAACTCACAGTCTGGGGCATTAAACAGCTCCAAGCAAGAGTCCTGGCTATAGAAAGATACCTAAAGGATCAACAGCTCCTAGGGATTTGGGGCTGCTCTGGAAAACTCATCTGCACCACCACTGTATCTTGGAACTCCAGTTGGAGTAATAAAACTTACGATGAAATTTGGGAAAACATGACCTGGATGCAGTGGGAGAGAGAAATCAGTAATTACACAAACACAATATATAGGTTGCTTGAAGACTCGCAAAACCAGCAGGAAAAAAATGAACAAGATTTACTAGCATTGGACAGTTGGGCAAGTCTGTGGAATTGGTTTAGCATAACAAAATGGCTGTGGTATATAAAAATATTCATAATGATAGTAGGAGGCTTGATAGGTTTAAGAATAATTTTTGCTATACTCTCTATAGTAAATAGAGTTAGGCAGGGATACTCACCTTTGTCGTTTCAGACCCTTACCCCAAACCCGAGGGAACTCGACAGGCCCGAAAGAATCGAAGAAGAAGGTGGAGAGCAAGACAGAGACAGATCCATACGATTAGTGAGCGGATTCTTGTCACTTGCCTGGGACGATCTGCGGAGCCTGAGCCTCTTCAGCTACCGCCAATTGAGAGACTTCATATTGGTGATAGTGAGAGTAGTGGAACTTCTGGGACGCAGCAGTCTCAGGGGACTACAGAAGGGGTGGGAAACCCTTAAGTATTTGGGAAGTCTTGTACAGTATTGGGGTTTAGAGTTAAAAAGGAGTGCTATTAGTCTGCTTGATACCATAGCAATAGTAGTAGCTGAGGGAACAGATAGGATTATAGAATTAATACAAAGAATTTGGAGAGCTATCTGCCACATACCTACAAGAATAAGACAGGGCTTTGAAGCAGCTTTGCAATAAAATGGGGGGCAAGTGGTCAAAAAGCAGTATAGTTGGATGGCCTGCTGTAAGAGAAAGAGTCAGAAGAACTCAGACAGGAACAAGAATCAGAAGAACTCAGACAGCAGCAGAGGGAGTAGGAGCAGCATCTCAAGACCTAGATAAACATGGGGCACTTACAACCAGTAACACAGCCACTAACAATGCTGCTTGTGCCTGGCTGGAAGCACAAGAGGAGGAAGAAGAAGTAGGTTTTCCAGTCAGACCTCAGGTACCTCTAAGACCAATGACTTATAAGGCAGCAGTTGATCTCAGCTTCTTTTTAAAAGAAAAGGGGGGACTGGAAGGGTTAATTTACTCCAAGAAAAGGCAAGATATCCTTGATTTATGGGTCTATAACACACAAGGTTTCTTCCCTGATTGGCAAAACTACACACCGGGACCAGGGGTCAGATTTCCACTGACCTTTGGATGGTGCTTCAAGCTAGTGCCTGTTGACCCAAGGGAAGTAGAAGAGGCCAATGAAGGAGAAAACAACTGTTTGCTACACCCTATGAGCCAGCAGGGAATGGAGGATGATGACAGAGAAGTACTAATGTGGAAGTTTGACAGTCTCCTAGCACGCAGACACATGGCCCGCGAGCTACATCCGGAGTATTACAAAGACTGCTGACACAGAAGGGACTTTCCGCTGGGGCTTTCCACTGGGGCGTTCCGGGAGGTGTGGTCTGGGCGGGACTGGGGAGTGGCCAGCCCTTGAATGCTGCATATAAGCAGCTGCTTTTCGCCTGTACTGGGTCTCTCTAGGTAGACCAGATCTGAGCCTGGGAGCTCTCTGGCTATCTAGGGAACCCACTGCTTAAGCCTCAATAAAGCTTGCCTTGAGTGCTTA
>C.ZA.04.04ZASK196B1_DQ056413_J.SE.94.SE7022_AF082395
TCTGTTGTGTGACTCTGGTAACTAGAGATCCCTCAGACCCTTGTTGGTAGTGTGGAAAATCTCTAGCAGTGGCGCCCGAACAGGGACTTGAAAGCGAAAGTAAGACCAGAGGAGATCTCTCGACGCAGGACTCGGCTTGCTGAAGTGCACTCGGCAAGAGGCGAGAGCGGCGGCTGGTGAGTACGCCAATTTTTATTTGACTAGCGGAGGCTAGAAGGAGAGAGATGGGTGCGAGAGCGTCAATATTAAGAGGGGGAAAATTAGATACATGGGAAAAAATTAAGTTAAGGCCAGGAGGAAAGAAACGCTATATGCTAAAACACCTAGTATGGGCAAGCAGGGAGCTGGAAAGATTTGCACTTAACCCTGGCCTTTTAGAAACATCAGAAGGCTGTAAACAAATAATAAACCAGCCCCAACCAGCTATTCAGACAGGAACAGAGGAACTTAAATCATTATACAACACAATAGCAGTGCTTTATTGTGTCCATGAAGGGATAAAGATACAAGACACCAAAGAAGCCCTAGACAAGATAGAGGAAGAACAAAACAAAAGTCAGCAAAAAAGTCAGCAAAAAACACAGCAAGCAAAAGCGGCTGACGGGAAAGTCAGTCAAAACTATCCTATAGTACAGAATCTCCAAGGGCAAATGGTACACCAGTCCCTATCACCTAGAACTTTGAATGCATGGGTAAAAGTAGTAGAGGAGAAGGGTTTTAACCCCGAGGTAATACCCATGTTTACAGCATTATCAGAAGGAGCCACCCCACAAGATTTAAACACCATGTTAAATACAGTGGGGGGACATCAAGCAGCCATGCAGATGTTAAAAGATACCATCAATGAGGAGGCTGCAGAATGGGATAGGTTACATCCAGTCCATGCAGGGCCTGTTGCACCAGGCCAAATGAGGGAACCTAGAGGAAGTGACATAGCAGGAACTACTAGTACCCCTCAGGAACAAATAGGATGGATGACAAACAACCCGCCTATTCCAGTGGGAGACATCTATAAAAGGTGGATAATTTTGGGGTTGAATAAAATAGTAAGAATGTATAGCCCTGTTAGCATTTTGGACATAAAACAAGGGCCAAAGGAACCCTTTAGAGATTATGTAGATCGGTTCTTTAAAACTTTAAGAGCTGAACAAGCTACACAAGATGTAAAGAATTGGATGACAGACACCTTGTTGGTCCAAAATGCAAACCCAGACTGTAAGACCATTTTAAGAGGATTAGGACAAGGGGCTACATTAGAAGAAATGATGACAGCATGTCAGGGAGTGGGAGGACCTGGCCACAAAGCAAGAGTATTGGCTGAGGCAATGAGCCAAGCAAACAGTCACATAATGATGCAAAGAAGCAATTTTAAAGGATCTAAGAGAACTGTTAAATGTTTCAACTGTGGCAAGGAAGGGCACATAGCCAGGAATTGCAGGGCCCCTAGGAAAAAGGGCTGTTGGAAGTGTGGAAAAGAAGGACACCAAATGAAAGACTGTACTGAAAGGCAGGCTAATTTTTTAGGGAAAATCTGGCCTTCCCACAAGGGGAGGCCAGGGAATTTCCTTCAGAGCAGGCCAGAGCCGACAGCCCCACCATTAGAGAGCTTCAGGTTCGAGGAGACAACCCCTGCTCCGAAACAGGAGTCGAAAGACAGGGAGTCGAAAGACAGGGAACCCTTAACTTCCCTCAAATCACTCTTTGGCAGCGACCCCTTGTCTCAATAAAGTAGGGGGCCAGACAAAGGAGGCTCTATTAGACACAGGAGCAGATGATACCGTATTAGAAGAAATAAATTTGCCAGGAAAATGGAAACCAAAGATGGTAGGGGGAATTGGAGGTTTTATTAAAGTAAGACAGTATGATCAAATACTTATAGAAATTTGTGGAAAAAAGGCTATAGGTACAGTATTAGTAGGACCTACGCCTGTCAACATAATTGGGAGAAATCTGTTGACTCAGCTTGGATGTACTCTAAATTTTCCAATCAGTCCTATTGAAACTGTACCAGTAAAATTAAAGCCAGGAATGGATGGCCCAAAGGTTAAACAATGGCCATTGACAGAAGAAAAAATAAAAGCATTAACAGCAATTTGTGAGGAAATGGAGAAGGAAGGAAAAATTACAAAAATTGGGCCTGAAAATCCATATAACACTCCTATATTTGCCATAAAAAAGAAAGACAGTACTAAGTGGAGGAAATTAGTAGATTTCAGGGAACTTAATAAAAGAACTCAAGATTTTTGGGAGGTTCAATTAGGAATACCACACCCAGCAGGATTAAAAAAGAAAAAATCAGTGACAGTATTGGATGTGGGGGATGCATATTTTTCAGTTCCTTTAGATGAAGGCTTTAGGAAATATACTGCCTTCACCATACCTAGTACAAACAATGAAACACCAGGGATTAGATATCAATATAATGTGCTTCCACAGGGATGGAAAGGATCACCAGCAATATTCCAGTGTAGCATGACAAAAATCTTAGAGCCTTTTAGAGTAAAAAATCCAGAAATAGTCACCTATCAATATATGGATGACTTATATGTGGGATCTGACTTAGAAATAGGGCAACATAGAGCAAAAATAGAAGAATTAAGAGAACATCTATTAAAGTGGGGATTCACCACACCAGATAAGAAACATCAGAAAGAACCCCCATTTCTTTGGATGGGATATGAACTCCATCCTGACAAATGGACAGTACAGCCTATAGAGTTGCCAGAAAAGGATAGCTGGACTGTCAATGATATACAGAAGTTAGTGGGAAAGTTAAACTGGGCAAGTCAGATTTACCCAGGAATTAAAGTAAAGCAACTTTGTAAACTACTTAGGGGGACCAAAGCACTAACAGACTTAATACCACTAACTGAAGAAGCAGAATTAGAATTGGCAGAGAACAGGGAAATTTTAAAAGAACCAGTACATGGAGTATATTATGACCCATCAAAAGACTCGATAGCTGAAATACAGAAACAGGGAGATGATCAATGGACATATCAAATTTACCAAGAACCATTCAAAAATCTGAAAACAGGGAAGTATGCAAAAAGGAGGACTGCCCACACTAATGATGTGAAACAGTTAACAGAGGCAGTGCAAAAAATAGCCATGGAAAGCATAGTAATATGGGGAAAGACTCCTAGATTTAGACTACCCATCCAAAAAGAGACATGGGAGACATGGTGGTCAGACTATTGGCAAGCCACCTGGATTCCTGAGTGGGAGTTTGTTAATACCCCTCCCCTAGTAAAATTATGGTACCAGCTGGAGAAAGAACCCATGGCAGGAGTAGAAACTTTCTATGTAGATGGAGCAGCTAATAGGGACACTAAAATGGGAAGAGCAGGGTATGTTACTGACAAAGGAAGGCAGAAAGTTATAACTCTAACTGAAACAACAAACCAGAAGACTGAATTGCAAACAATCCAGCTAGCTTTGCAAGATTCAGGATCAGAAGTAAACATAGTGACAGACTCACAGTATGCATTAGGAATCATTCAAGCACAACCAGATAAGAGTGAGTCAGAGTTAGTTAACCAAGTAATAGAACAATTAATAAAAAAGGAAAGGGTCTACCTGTCATGGGTACCAGCACATAAAGGAATTGGAGGAAATGAACAAGTAGATAAATTAGTAAGTAATGGAATCAGGAAAGTACTGTTTCTAGATGGAATAGATAAGGCTCAAGAAGAGCATGAAAAGTATCACAGCAATTGGAGAGCAATGGCTAGTGAATTTAATCTGCCACCCATAGTAGCAAAAGAAATAGTAGCTAGCTGTGATAAATGCCAGTTAAAAGGGGAAGCCATGCATGGACAAGTAGACTGTCGTCCAGGGATCTGGCAATTAGATTGTACACATCTAGAAGGGAAAGTCATCCTAGTAGCAGTCCATGTAGCCAGTGGCTACATAGAAGCAGAGGTTATCCCAGCAGAAACAGGACAAGAAACAGCATACTATATATTAAAACTAGCAGGAAGATGGCCAGTCAAAGTAATACACACAGACAATGGTACTAATTTCACCAGTGCTGCAGTTAAGGCAGCCTGTTGGTGGGCAGGTATCCAACAGGAATTTGGAATTCCCTACAATCCCCAAAGTCAAGGAGTAGTAGAATCCATGAATAAAGAATTAAAGAAAATCATAGGGCAGGTAAGAGATCAAGCTGAGCACCTTAAGACAGCAGTACAAATGGCAGTATTCATTCACAATTTTAAAAGAAAAGGGGGGATTGGGGGGTACAGTGCAGGGGAAAGAATAATAGACATAATATCAACAGACATACAAACTAAAGAACTACAAAAGCAAATTATAAAAATTCAAAATTTTCGGGTTTATTACAGAGACAGCAGAGACCCTATTTGGAAAGGACCAGCCAAACTACTCTGGAAAGGTGAAGGGGCAGTAGTAATACAAGATAATAGTGACATAAAGGTAGTACCAAGAAGGAAAGTAAAAATCATTAAGGATTATGGAAAACAGATGGCAGGTGCTGATTGTGTGGCAGGTAGACAGGATGAGGATTAGAACATGGAATAGTTTAGTAAAGCACCATATGTATATTTCAAAAAGAGCTAAAGGGTGGTTTTACAGACATCATTATGAAAGCAGACATCCAAAAGTAAGTTCAGAAGTACACATTCCATTAGGGGACGCAAGATTAATTATAAAAACATATTGGGGTTTGCAAACAGGAGAAAGGGATTGGCATTTGGGTCATGGATGTTCCATAGAATGGAGACTGAGAAGGTACAGAACACAAGTAGACCCTGGCCTGGCAGACCAACTAATTCATATGCATTACTTTGATTGTTTTTCAGACTCTGCCATAAGGAAGGCCATATTAGGACAAATAGTTAGCCCTAGGTGTGACTACCAAGCAGGACATAACAAGGTAGGATCTCTACAATATCTGGCATTAACAGCATTAATAAAACCAAAAAGGATAAAGCCACCTCTGCCTAGTGTTAGGAAATTAGTAGAGGATAGATGGAACAAGCCCCGGAAGACCAGGGGCCGCAGAGGGAACCATACAATGAATGGACACTAGAAATTTTAGAAGAACTCAAGCAGGAAGCTGTCAGACACTTTCCTAGACCGTGGCTCCAAAATTTAGGACAACACATCTATGATACCTATGGGGATACTTGGACAGGAGTTGAAGCTATCATAAGAATACTACAACAACTACTGTTTGTTCATTTCAGAATTGGGTGTCAGCATAGCAGAATAGGCATTTTGCAGCGGAGAAGAGCAAGAAATGGAGCCAGTAGATCCTAACCTAGAGCCCTGGAACCATCCGGGAAGTCAGCCTAAAACTCCTTGTAGTCAATGCTATTGTAAAAAATGCAGCTATCATTGTTTAGTTTGCTTTCAGACAAAAGGCTTAGGCATTTACTATGGCAGGAAGAAGCGGAGACAGCGACGAAGCGCTCCTTCAAGCAATAAGGATCATCAAAATCCTATATCAAAGCAGTAAGTACCAGTAGATGTAATGATAAGTTTATTAGCAAGAATAGATTATAGAATAGGAATAGCAGCACTTCTAATAGCACTAATCATAGCAATAGTTGTGTGGACCATAGTATATTTAGAATATAGAAAATTGGTAAAACAAAGAAAAATAGACTGGTTAATTAAAAGAATTAGGGAAAGAGCAGAAGACAGTGGCAATGAGAGTGAGAGGGATACAGAGGAATTATCCACAATGGTGGATATGGGGCATCTTAGGCTTTTGGATGTTAATGATTTGTAATGTGTTAGGAAACTTGTGGGTCACAGTATATTATGGGGTACCTGTGTGGAAAGAAGCAAAAACTACTCTATTCTGTGCATCAGATGCTAAAGCATATGAGAGGGAGGTGCATAATGTCTGGGCTACACATGCCTGTGTACCCACAGGCCCCAACCCACAAGAACTAGTTTTGGAAAATGTAACAGAAAACTTTAATATGTGGAAAAATGACATGGTGGATCAGATGCATGAGGATGTAATCAGTTTATGGGATCAAAGCCTAAAGCCATGTGTAAAGTTGACCCCACTCTGTGTCACTTTAGACTGCAGAGATGTCACCATTAATGTTACCAAGAAGGACAATGGTACCAGTAGGAATGAGACCTATGAGGATAATGGCAGGAAGGAGATAAAGAATTGCTCTTTCAATGCAACCGCAGAAATAAGAGATAAGAAGAACAAAGAGTATGCACTTTTTTATAAACTTGATATAGTACCACTTAATGACAACTCTAGTGAGAAATATGACAACTCTAGTAAGGAATATAGATTAATAAATTGTAATACCTCAACCATAACACAAGCCTGTCCAAAGGTCTCTTTTGACCCAATTCCTATACATTATTGTGCTCCAGCTGGTTATGCGATTCTAAAATGTAATGATAAAGAATTCAATGGAACAGGACCATGCCATAATGTCAGTACAGTACAATGTACACATGGAATTAAACCAGTGGTATCAACTCAACTACTGTTAAATGGTAGCTTATCAGAAAAAGAGATAATAATTAGATCTGAAAATCTGACAGACAATGCTAAAACAATAATAGTACAGCTTAATCAATCCATAGACATTGTGTGCACAAGACCCAACAATAATACAAGGAAAAGTATAAGGATAGGACCAGGACAAGCATTCTATGCAACAAATGACATAATAGGAAACATAAGACAAGCACATTGTAACATTAATAAGACAGACTGGAATAGAACTTTACAATGGGTAGGGGAAAAATTAAAAGAGCACTTCCCTAATATAACTACAATAGAATTTAAGCCACCCTCAGGAGGGGACCTAGAAATTACAATGCATAGTTTCAATTGTAGAGGAGAATTTTTCTATTGCAATACATCAAAACTATTTAATAGCACATATGTTAATAGGACAGACATGAATGATGATACAGGAAATAATTCAACCATCACACTTCCATGCAGAATAAAACAAATTATAAACATGTGGCAGGAGGTAGGACGAGCAATGTATGCCCCTCCCATTGAAGGAAACATAACATGTAAATCAAATATCACAGGAATACTATTAGTACGTGATGGAGGAATAAATAAGACAAATAACACAGAGACATTCAGACCAGGAGGAGGAAATATGAAGGACAATTGGAGAAGTGAATTATATAAATATAAAGTGGTAGAAATTAAGCCATTAGGAATAGCACCCACTGAAGCAAAAAGGAGAGTGGTGGAGAGAGAAAAAAGAGCAGTAGGAATGGGAGCTGTGTTCCTTGGGTTCTTGGGAGTAGCAGGAAGCACTATGGGCGCAGCGTCAATAGCGCTGACGGCACAGGCCAGACAAGTGTTGTCTGGTATAGTGCAACAGCAAAGCAATTTGCTGAGGGCTATAGAGGCGCAACAGCATATGTTGCAACTCACGGTCTGGGGCATTAAGCAGCTCCAGGCAAGAGTCCTGGCTATGGAAAGATACCTACAGGATCAACAGCTCCTAGGAATTTGGGGCTGCTCTGGAAAACTCATCTGCACCACTGCTGTGCCCTGGAACTCCAGTTGGAGTAATAAATCTTATCATGATATTTGGGATAACATGACCTGGATGCAGTGGGATAAAGAAATTAGTAATTACACAAACATCATATACCAGTTGCTTGAAGAATCGCACATCCAGCAGGAACAAAATGAAAAAGACTTATTAGCATTGGACAAGTGGCAAAATCTGTGGAATTGGTTTAGCATAACAAAATGGTTGTGGTATATAAAAATATTTATACTAATAGTAGGAGGCTTAATAGGTTTGAGAATAATTTTTGCTGTGCTATCTATAGTAAACAGAGTTAGGCAGGGATACTCACCTCTGTCGTTGCAGACCCTTGCCCCAAACCCGAGGGGACCCGACAGGCTCAGAGGAATCGAAGAAGAAGGTGGAGAGCAAGACAGAGACAGATCCATTCGATTAGTGAGCGGATTCTTAGCACTTGCCTGGGACGATCTGCGGAGCCTGTGCCTTTTCAGCTACCACCGATTGAGGGACTTCATATTGATTGTAACGAGAGTGGTGGAACTTCTGCTACAGAGGGGGTGGGAAGCCCTTAAATATCTAGGAAGTCTTGTGCAGTATTGGGGTTTGGAACTAAAAAAGAGTGCTATTAATCTGCTTGATACCATAGCAATAGTAGTAGCTGAAGGAACAGATAGGATTATAGAATTAGTACAAAGAATTTGTAGAGCTATCCTCAACATACCTACAAGAATAAGACAGGGCTTTGAAGCAGCTTTGCAATAAAATGGGGAGCAAATGGTCAAAAAGCAGCATAGTTGGATGGCCTAAAGTAAGAGAAAGAATGGAAAGAGCCGAGCCAGCAGCAGAGGGAGTAGGAGCAACGTCTCAAGACTTAGCTAAATATGGAGCACTTACAAGCAGCAACACAGTCACCAATAATGCTGACTGTGCCTGGCTGGAAGCACAAGAGGAAGG
>C.ZA.99.99ZACM9_AF411967_K.CM.96.MP535_AJ249239
TGGAAGGGTTAATTTACTCCAAGCAAAGGCAAGATATCCTTGATTTGTGGGTCTATAACACACAAGGCTACTTCCCAGATTGGCAAAACTACACACCAGGACCAGGGGTCAGATATCCACTGACCTTTGGATGGTGCTTCAAGCTGGTGCCAGTCGATCCAAAGGAAGTAGAAGAGGCCAATGAAGGAGAAAATAACTGTTTACTACACCCTATGAGCCTGCATGGAATGGAGGATGAGCACGGAGAAGTACTAAGATGGAAGTTTGACAGTATGCTAGCACGCAGACACATGGCCCGCGAGCTACATCCGGAGTATTACAAAGACTGCTGACACAGAAGGGACTTTCCGCTGGGACTTTCCACTGGGGCGTTCCAGGAGGTGTGGTCTGGGCGGGACCGGGGAGTGGCCAGCCCTCAGATGCTGCATATAAGCAGCTGCTTTTCGCCTGTACTGGGTCTCTCTAGGTAGACCAGATCTGAGCCCGGGAGCTCTCTGGCTATCTAGGGAACCCACTGCTTAAGCCTCAATAAAGCTTGCCTTGAGTGCTCTAAGTAGTGTGTGCCCGTCTGTTGTGTGACTCTGGTAACTAGAGATCCCTCAGACCCTTTTTGGTAGTGTGGAAAATCTCTAGCAGTGGCGCCCGAACAGGGACTTGAAAGCGAAAGTAAGACCAGAGCAGATCTCTCGACGCAGGACTCGGCTTGCTGAAGTGCACTCGGCAAGAGGCGAGAGCGGCGACTGGTGAGTACGCCGAATTTTATTTGACTAGCGGAGGCTAGAAGGAGAGAGATGGGTGCGAGAGCGTCAATATTAAGAGGGGGGAAATTAGATGCATGGGAAAAAATTAGGTTAAGGCCAGGGGGAAAGAAACAATATAGGATAAAACACCTAGTATGGGCAAGCAGGGAGCTGGAAAAATTTGCACTTAACCCTGGTCTTTTAGAAACTTCAGAAGGCTGTAAACAAATAATACAACAGCTACACCCAGCTCTTAAGACAGGAACAGAGGAACTTAGATCATTATATAACACAGTAGCAACTCTCTATTGTGTACATGAAAGGATAGAGGTACGAGACACCAAGGAAGCCTTAGATAAGATAGAGGAAGAACAAAACAAAAGTCAGCAAAAAACACAGCAGGCAAAAGAGGCTAATGGTAACGGGAAGATCAGTCAAAATTATCCAGTAGTGCAGAACCTCCAAGGGCAAATGGTACACCAGGCCATATCACCAAGGACTTTAAATGCATGGGTAAAAGTAGTAGAGGAGAAGGCGTTCAGCCCGGAGGTAATACCCATGTTTACAGCATTATCAGAAGGAGCCACCCCCTCAGATTTAAACACCATGTTAAATACAGTGGGGGGACATCAAGCAGCCATGCAAATGTTAAAGGATACCATCAATGAGGAGGCTGCAGAATGGGATAGGTTACATCCAGTGCATGCAGGGCCTATTGCACCAGGCCAAATGAGAGAACCAAGGGGTAGTGACATAGCAGGAACTACTAGTACCCTTCAGGAACAAATAGCATGGATGACAAGCAACCCACCTATTCCAGTGGGAGACATCTATAAAAGATGGATAATTCTGGGTTTAAATAAAATAGTAAGAATGTATAGCCCTGTCAGCATTTTGGACATAAAACAAGGGCCAAAAGAACCCTTTAGAGACTATGTAGACCGATTCTTTAAAACTTTAAGAGCTGAACAATCTACACAAGAGGTAAAAAATTGGATGACAGATACCTTGTTGGTTCAAAATGCGAACCCAGACTGTAAGACCATTTTAAGAGCATTAGGACCAGGGGCTACATTAGAAGAAATGATGACAGCATGTCAGGGAGTGGGAGGACCTGGCCACAAAGCAAGAGTCTTGGCTGAGGCAATGAGCCAAGCAAGCAAAGTGAACATAACGATGCAGAGAAGCAATTTTAAGGGCCATAAAAGAACTGTTAAATGTTTCAACTGTGGCAAGGAAGGGCACATAGCCAGAAATTGCAGGGCCCCTAGGAAAAAAGGCTGTTGGAAATGTGGAAAGGAAGGACACCAAATGAAAGATTGTACTGAAAGGCAGGCTAATTTTTTAGGGAAAATTTGGCCTTCCCACAAGGGGAGGCCAGGGAATTTCCTTCAGAGCAGACCAGAGCCAACAGCCCCACCAGCAGAGAGCTTCAGGTTCGAGGGGACAACTCCTGCTCCGAAGCGGGAGCTGAAAGACGAGGAACCACCCTTAACTTCCCTCAAATCACTCTTTGGCAGCGACCCCTTGTCTCAATAAAAGTAGGGGGTCAGATAAAGGAGGCTCTCTTAGACACAGGAGCAGATGACACAGTATTAGAAGAAATAAATTTGCCAGGAAAATGGAAACCAAAAATGATAGGAGGAATTGGAGGTTTTATCAAAGTAAGACAGTATGATCAAATACTTATAGAAATTTGTGGAAAAAAGGCTATAGGTGCAGTATTAGTGGGACCTACACCTGTCAACATAATTGGAAGGAATATGTTGACTCAGCTCGGATGTACACTAAATTTTCCAATTAGTCCCATTGAAACTGTACCAGTAAAATTAAAGCCAGGAATGGATGGCCCAAAAGTTAAACAATGGCCATTGACAGAAGAAAAAATAAAAGCATTAACAGCAATTTGTGAAGAAATGGAGAAGGAAGGAAAAATTACAAAAATTGGGCCTGAAAATCCATATAACACTCCAGTATTTGCCATAAAAAAGAAGGACAGTACCAAGTGGAGAAAATTAGTAGATTTCAGGGAACTCAATAAAAGAACTCAAGACTTTTGGGAAGTCCAATTAGGAATACCACACCCAGCAGGGTTAAAAAAGAAAAAATCAGTGACAGTACTGGATGTGGGGGATGCATATTTTTCAGTTCCTTTAGATGAAAACTTCAGGAAATATACTGCATTCACCATACCTAGTATAAACAATGAAACACCAGGGATTAGATATCAATATAATGTGCTTCCACAGGGATGGAAAGGATCACCAGCAATATTTCAGAGTAGCATGACAAAAATCTTAGAGCCCTTTAGGACACAAAATCCAGACATAGTTATTTATCAATATATGGATGACTTGTATGTAGGATCTGATTTAGAAATAAAGCAACATAGAGCAAAAATAGAGGAGTTAAGAGAACATCTATTAAAGTGGGGATTTACCACACCAGACAAGAAACATCAGAAAGAACCCCCATTTCTTTGGATGGGGTATGAACTCCATCCTGACAAATGGACAGTACAGCCTATACAACTGCCAGAAAAGGATAGCTGGACTGTCAATGATATACAGAAGTTAGTGGGAAAATTAAACTGGGCAAGTCAGATTTACCATGGGATTAAAGTAAGGCAACTTTGCAAACTCCTTAGGGGGGTCAAAGCACTAACAGACATAGTACCACTAACTGAAGAAGCAGAATTAGAATTGGCAGAGAACAGGGAAATTCTAAAAGAACCAGTACATGGAGTATATTATGACCCATCAAAAGACTTAATAGCAGAAATACAGAAACAGGGAAATGACCAATGGACATATCAAATTTACCAAGAACCATTCAAAAATCTGAAAACAGGAAAGTATGCAAAAATGAGGACTGCCCACACTAATGATGTAAAGCAGTTAACAGAGGCAGTACAAAAAATAGCCATGGAAAGCATAGTAATATGGGGAAAGACTCCTAAATTCAGACTACCCATCCAAAAAGAAACATGGGAGACATGGTGGACAGACTATTGGCAAGCCACCTGGATTCCTGAGTGGGAGTTTGTTAATACCCCTCCCCTAGTAAAATTATGGTACCAACTGGAAAAAGATCCAATAGCAGGGGTAGAAACTTTCTATGTAGATGGAGCAGCTAATAGGGAAACTAAAAAGGGAAAAGCAGGGTATGTTACTGACAAAGGAAGACAGAAAATTGTTTCTCTAACTGAAACAACAAATCAGAAGGCTGAGTTACAAGCAATTCAGCTAGCTCTGCAGGATTCAGGACCAGAAGTAAACATAGTAACAGACTCACAGTATGCATTAGGAATCATTCAAGCACAACCAGATAAGAGTGAATCAGAGTTGGTTAATCAAATAATAGAACAGTTAATAAACAAGGAAAGAATCTACCTGTCATGGGTACCAGCACATAAAGGAATTGGAGGAAATGAACAAGTGGACAAATTAGTAAGTAGTGGAATCAGGAAAGTGCTGTTTCTAGATGGGATAGATAAGGCTCAAGAAGAGCATGAAAAATATCACAGCAATTGGAGAGCAATGGCTAGTGAGTTTAATCTGCCACCCATAGTAGCAAAAGAAATAGTAGCTAGCTGTGATAAATGTCAACTAAAAGGGGAAGCCATGCATGGACAAGTAGACTGTAGTCCAGGGATATGGCAATTAGACTGTACACATTTAGAAGGAAAAATCATCCTGGTAGCAGTCCATGTAGCCAGTGGCTACGTAGAAGCAGAGGTTATCCCAGCAGAAACAGGACAAGAAACAGCATACTATATACTAAAGTTAGCAGGAAGATGGCCAGTCAAAGTAATACATACAGACAATGGCAGCAATTTCACCAGTACTGCAGTTAAGGCAGCCTGTTGGTGGGCAGGTATCCAACAGGAATTTGGAATTCCCTACAATCCTCAAAGCCAGGGAGTAGTAGAATCCATGAATAAAGAATTAAAGAAAATCATAGGGCAAGTAAGAGATCAAGCTGAGCACCTTAAGACAGCAGTACAAATGGCAGTATTCATTCACAATTTTAAAAGAAAAGGGGGGATTGGGGGATACAGTGCAGGGGAGAGAATAATAGACATAATAGCAACAGACATACAAACTAAAGAATTACAAAAACAAATTATAAAAATTCAAAATTTTCGGGTTTATTACAGAGACAGCAGAGACCCTATTTGGAAAGGACCAGCCAAACTACTCTGGAAAGGTGAAGGGGCAGTAGTAATACAAGATAATAGTGACATAAAGGTAGTACCAAGGAGGAAAGTAAAAATTATTAGGGACTATGGAAAACAGATGGCAGGTGATGATTGTGTGGCAGGTAGACAGGATGAGGATTAGAACATGGAATAGTTTAGTAAAACACCATATGTATGTTTCAAAGAAAGCTAATGGATGGTTCTACAGACATCATTATGAAAGCAGACATCCAAGAGTAAGTTCAGAAGTACACATTCCATTAGGGGAGGCTAGATTAGTGATAAAAACATATTGGGGTTTGCAGACAGGAGAAAGAGCTTGGCAATTGGGTCATGGAGTCTCCATAGAATGGAGATTGAGAAGATATAGCACACAAGTAGACCCTGGCCTGGCAGACCAACTAATTCATATGCATTATTTTGATTGTTTTGCAGACTCTGCCATAAGAAAAGCCATATTAGGACATATAGTTAGCCCTAGATGTGAATATCAAGCAGGACATAACAAGGTAGGATCTCTACAGTACTTGGCACTGACAGCATTGATAAAACCAAAAAAGAGAAAGCCACCTCTGCCTAGTGTTAGGAAATTAGTAGAGGACAGATGGAACAAGCCCCAGAAGACCAGGGGCCGCAGAGGGAACCATACAATGAATGGACATTAGAGATACTAGAGGAACTCAAGCAGGAAGCTGTCAGACACTTTCCTAGACCATGGCTTCATGGCTTAGGACAACATATCTATGAAACCTATGGGGATACTTGGACAGGAGTCGAAGTGATAATAAGAGTTCTGCAACAATTACTGTTCATTCATTTCAGAATTGGGTGCCAGCATAGCAGAATAGGCATTTTGCGACAGAGAAGAGCAAGAAATGGAGCCAATAGATCCTAATTTAGAACCTTGGAACCATCCAGGAAGTCAGCCTAAAACTGCTTGTAATAGGTGTTATTGCAAACGCTGCTGCTACCATTGTCTAGTTTGCTTTCAGACAAAAGGCTTAGGCATTTCCTATGGCAGGAAGAAGCGGAGACAGCGACGAAGCGCTCCTCCAAGCAGTGAAGATCATCAAAATCTTATATCAAAGCAGTAAGTACTAAATAGTATATGTAATGTTAAACTTAAATGCAAGAATAGATTATAGATTAGGAGTAGGAGCATTGATAGTAGCACTAATCATAGCAATAGTTGTGTGGACCATAGTATATATAGAATATAGGAAATTGTTAAGACAAAGAAAAATAGACCGTTTAATTAAAAGAATTAGGGAAAGAGCAGAAGACAGCGGCAATGAGAGTGAGGGAGATACTGAGGAATTATCAACAATGGTGGATATGGAGCATCTTAGGCTTTTGGATGATTTGTAATGTGGTGGGAAACTTGTGGGTCACAGTCTATTATGGGGTACCTGTGTGGAAAGAAGCAAAAACTACTCTATTCTGTGCATCAGATGCTAAAGCATATGAGAAAGAAGTGCATAATGTCTGGGCTACACATGCCTGTGTACCCACAGACCCCAACCCACAAGAAATGCATTTGGAAAATGTAACAGAAAATTTTAATATGTGGAAAAATGACATGGTGGATCAGATGCATGAGGATATAATCAGTTTATGGGACCAAAGCCTAAAACCATGTGTAAAGTTGACCCCACTCTGTGTCACTTTAGAATGTACAAATGCTACCTTTAATAGTACTACCCATAATAATGCTACCTATAATGATACCATAGCTGGAGAAATGAAAAATTGCTCTTTCAATGTAACCACAGAACTAAGAGATAGGAAAAAGAAAGAGTATGCACTTTTTTATAGACTTGATATAGTACCACTTGGGGGCAACTCTAGTAAGGGCAACGCTAGTAAGTATAGATTAATAAATTGTAATTCCTCAACCATAACACAAGCCTGTCCAAAGGTCTCTTTTGATCCAATTCCTATACATTATTGTGCTCCAGCTGGTTATGCGATTCTAAAGTGTAATAATAAGACATTCAATGGGACAGGACCATGCAATAATGTCAGCACAGTACAATGTACACATGGAATTAAGCCAGTGGTATCAACTCAACTACTGTTAAATGGTAGCCTAGCAGAAGAAGAAATAATAATTAGATCTGAAAATTTGACAGACAATGTCAAAACAATAATAGTACATCTTAATGAATCTGTACCGATTGTATGTGCAAGACCAGGCAATAATACAATAAAAAGGATAAGAATAGGACCAAGATACGCATTCTATGCAAAAGAAACTATAATAGGAGACATAAGACAAGCACATTGTAACATTAGTGAAGAGAAATGGAACAAAACGTTACAACAGGTAGGGAAAAAATTAAAAGAACATTTCCCTAATAAAACAATTACATTTGCACCACACTCAGGAGGGGATCTAGAAATTATAACACATAGCTTCAATTGTAGAGGAGAATTTTTCTATTGCAATACATCAAAACTGTTTAATAGGCCTAATGGTACAGAGAGTAATTCAAACCAAACCACAGAGAGTAATTCAAACAGAACCATCACACTCCAATGCAGAATAAGACAAATTATAAACATGTGGCAGGAGGTAGGACAAGCAATGTATGCCCCTCCCATTAAAGGAAACATAACATGTACCTCAAATATCACAGGACTACTATTGACACGAGATGGAGGAGAGAAAAATACAACAAATGAAAAAGAGATATTCAGACCTGGAGGAGGAGATATGAGGGACAATTGGAGAAGTGAATTATACAAATATAAAGTGGTACAGATTGAACCACTAGGAATAGCACCCACCAGGGCCAGGAGAAGAGTGGTGCAGAGAGAAAAAAGAGCAGTAGGATTAGGAGCTGTGTTCTTTGGATTCTTGGGAGCAGCAGGAAGCACTATGGGCGCGGCGTCAATAACGCTGACGGTACAGGCCAGACAATTATTGTCTGGTATAGTGCAACAGCAAAGCAATTTGCTGAGGGCTATAGAGGCGCAACAGCATATGTTGCAACTCACGGTCTGGGGCATTAAGCAGCTCCAGACAAGAGTCCTGTCTATAGAAAGATACCTAAGGGATCAACAGCTCCTAGGGCTTTGGGGCTGCTCTGGAAAACGCATCTGCACCACTGCTGTGCCTTGGAACTCCAGTTGGAGCAATAGATCTAAGGAAGAGATTTGGGACAATATGACCTGGATGCAGTGGGATAGAGAAATTAGTAATTACACAGACATAATATACAACTTGCTTGAAGAATCGCAAAACCAGCAGGAAGAGAATGAAAAAGAATTACTAGAATTGGACAGTTGGAAAAACTTGTGGAGTTGGTTTGACATAACACAGTGGCTGTGGTATATAAAAATATTCATAATGATAATAGGAGGCTTAATAGGCTTAAGAATAATTTTTGCTGTGCTCTCTATAGTAAATAGAGTTAGGCAGGGATACTCACCTTTGTCGTTTCAGACCCTTATCCCAACCTCGAGGGGTCCACCCGACAGACTCGAAAGAATCGAAGAAGAAGGTGGAGAGCAAGACAAAGACAGATCCGTGAGATTAGTGAGCGGATTCTTGCCACTTATCTGGGACGATCTGCGGAGCCTGTGCCTTTTCAGCTACCACCGATTGAGAGACTTCATATTAATTGTAGTGAGGGCAGTGGAACTTCTGGGACGCAGGGGGTGGGAAATCCTTAAGTATCTGGGAAGTCTTGTGCAATATTGGGGGCTAGAGCTAAAAAGGAGTGCTATTAGTCTGCTTGATACCATAGCAATAGCAGTAGCTGAAGGAACAGATAGGATTATAGAATTCATACAAAGACTTGGTAGAGCTATCTACCACATACCTAGAAGAATAAGACAAGGCTTTGAAGTAGCTTTGCAATAAAATGGGGGGCAAGTGGTCAAAAAGCAGTATAGTTGGATGGCCTGCTATAAGACAGGCTATGAGACGTACTGATCCAGCAGCAAGACATACTGAGCCAGCAGCAGAGGGAGTAGGAGCAGCGTCTCAAGACTTGGCTAAACATGGGGCACTTACAACTAGCAACACAGCAAGCAACAATGCTGCTTGTGCCTGGCTGGAGGCACAAGAGGAGGGAGAAGAAGTAGGCTTTCCAGTCAGACCTCAGGTACCTTTAAGACCAATGACTTATAAGAGAGCATTTGATCTCAGCTTCTTTTTAAAAGAAAAGGGGGGACTGGAAGGGTTAATTTACTCCAAGCAAAGGCAAGATATCCTTGATTTGTGGGTCTATAACACACAAGGCTACTTCCCAGATTGGCAAAACTACACACCAGGACCAGGGGTCAGATATCCACTGACCTTTGGATGGTGCTTCAAGCTGGTGCCAGTCGATCCAAAGGAAGTAGAAGAGGCCAATGAAGGAGAAAATAACTGTTTACTACACCCTATGAGCCTGCATGGAATGGAGGATGAGCACGGAGAAGTACTAAGATGGAAGTTTGACAGTATGCTAGCACGCAGACACATGGCCCGCGAGCTACATCCGGAGTATTACAAAGACTGCTGACACAGAAGGGACTTTCCGCTGGGACTTTCCACTGGGGCGTTCCAGGAGGTGTGGTCTGGGCGGGACCGGGGAGTGGCCAGCCCTCAGATGCTGCATATAAGCAGCTGCTTTTCGCCTGTACTGGGTCTCTCTAGGTAGACCAGATCTGAGCCCGGGAGCTCTCTGGCTATCTAGGGAACCCACTGCTTAAGCCTCAATAAAGCTTGCCTTGAGTGCTCTAAGTAGTGTGTGCCCGTCTGTTGTGTGACTCTGGTAACTAGAGATCCCTCAGACCCTTTTTGGTAGTGTGGAAAATCTCTAGCA
>D.UG.98.98UG57130_AF484504_F1.BE.93.VI850_AF077336
GCGAGAGCGTCAGTATTAAGCGGGGGAAAATTAGATGCATGGGAAAAAATTCGGTTACGGCCAGGAGGAAAGAAAAAATATAGACTGAAACATATAGTATGGGCAAGCAGGGAGTTAGAACGATTCGCACTTAATCCTGGCCTTTTAGAGACATCAGAAGGCTGTAAACAAATAATAGGACAGCTACAACCAGCTGTTAAGACAGGATCAGAAGAACTTAAATCATTATTTAATACAGTAGCAACCCTCTATTGTGTACATGAGAGGATAGAGGTAAAGGACACCAAGGAAGCTTTAGAAAAAATAGAGGAAGAACAAACCAAAAGTAAGAAAAAGGCACAGCAAGCAACAGCTGACAAAGGGGTCAGTCAAAATTACCCTATAGTACAGAATCTTCAGGGACAAATGGTACACCAGTCTCTATCACCTAGAACTTTAAATGCATGGGTAAAGGTGATAGAAGAGAAGGCTTTTAGCCCAGAAGTAATACCCATGTTTTCAGCATTATCAGAAGGGGCCACTCCCACAGATTTAAACACCATGCTAAATACAGTAGGGGGGCATCAAGCAGCCATGCAAATGTTAAAAGAGACCATCAATGAGGAAGCTGCAGAATGGGATAGGCTACATCCACCGCAGGCAGGGCCTGTTGCACCAGGCCAGATGAGGGAACCAAGGGGAAGTGATATAGCAGGAACTACTAGCACCCTTCAGGAACAAATAGGGTGGATGACAAGCAATCCGCCTGTCCCAGTAGGAGAGATCTATAAAAGATGGATAATCCTGGGGTTAAATAAAATAGTAAGAATGTATAGTCCTGTCAGCATTTTGGACATAAGACAAGGTCCAAAGGAACCCTTTAGAGATTATGTAGATCGGTTCTATAAAACTCTAAGAGCCGAGCAAGCTTCACAAGATGTAAAAAATTGGATGACCGAAACCTTGTTGGTCCAAAATGCAAACCCAGATTGTAAAACTATCTTAAAAGCACTGGGACCAGGGGCTACATTAGAAGAAATGATGACAGCATGTCAGGGAGTAGGGGGACCCAGTCATAAAGCAAGAGTTTTGGCTGAGGCAATGAGCCAAGCAACAAATTTGAATGGTGCCGCAATGATGCAGAGAAGCAATTTTAAGGGCCCAAGGAAAATTGTTAAGTGTTTCAACTGTGGCAAAGAAGGGCACATAGCAAGAAATTGCAAGGCTCCTAGGAAAAAGGGCTGTTGGAAATGTGGCAGGGAAGGACACCAAATGAAAGATTGCACTGAAAGACAGGCTAATTTTTTAGGGAAAATTTGGCCTTCCCACAAGGGGAGGCCAGGCAACTTCCTTCAAAACAGACCAGAGCCAACAGCCCCACCAGCAGAGAGCTTCGGGTTTGGGGAGGAGATAACCCCCTCTCAGAAACAAGAGCAGAAAAACCAGGAACCACAACCTTTAACTTCCCTCAGATCACTCTTTGGCAACGACCCCTTGTTACCATAAAGATAGGGGGACAGCTAAAGGAAGCTCTATTAGATACAGGAGCAGATGATACAGTGTTAGAAGACATAAATTTGCCAGGAAAATGGAAACCAAAAATGATAGGGGGAATTGGAGGTTTTATCAAAGTAAGACAGTATGATCAAATACCCATAGAAATCTGCGGATATAAAGCTATAGGTACAGTATTAATAGGACCTACACCTGTCAACATAATTGGAAGAAATTTGTTGACTCAGATTGGCTGCACTTTAAATTTTCCAATTAGTCCTATTGAAACTGTACCAGTAAAATTAAAGCCAGGGATGGATGGCCCAAAAGTTAAACAATGGCCATTGACAGAAGAAAAAATAAAAGCACTAACAGAAATTTGTGCAGACATGGAAAAAGAAGGAAAAATTTCAAGAATTGGGCCTGAAAATCCATACAATACTCCAGTATTTGCCATAAAGAAAAAAGACAGTACTAAGTGGAGAAAATTAGTAGATTTCAGAGAACTTAATAAGAGAACTCAAGATTTCTGGGAAGTTCAACTAGGAATACCACATCCTGCAGGGCTAAAGAAGAAAAAATCAGTAACAGTACTGGATGTGGGTGATGCATATTTTTCAGTTCCCTTAGATATAGACTTTAGAAAGTATACAGCATTCACCATACCTAGTACAAACAATGAGGCACCAGGAATTAGATATCAGTACAATGTGCTTCCACAGGGATGGAAAGGATCACCAGCAATATTCCAATGTAGCATGACAAAAATCTTAGAACCCTTTAGAAAACAAAATCCAGAAATAGTTATCTATCAATACATGGATGATTTGTATGTAGGATCTGACTTAGAAATAGGGCAGCATAGAACAAAAATAGATGAATTAAGGGAACATCTATTAAGGTGGGGATTTACCACACCAGACAAAAAACATCAGAAAGAACCTCCATTTCTTTGGATGGGTTATGAACTCCATCCTGATAAATGGACAGTGCAGCCTATAAAGCTGCCAGAAAAAGAAAGCTGGACTGTCAATGATATACAGAAGTTAGTGGGAAAATTAAATTGGGCAAGCCAGATTTATCCAGGAATTAGAGTAAGACACTTATGTAAACTCCTTAGGGGAGCCAAAGCACTGACAGAAGTAATACCACTGACAAAAGAAGCAGAATTAGAACTGGCAGAAAACAAGGAAATTCTAAAAGAACCAGTACATGGAGTGTATTATGACCCATCAAAAGACTTAATAGCAGAAGTACAGAAACAAGGGCAAGACCAATGGACATATCAAATTTATCAAGAGCCATTTAAAAATCTGAAAACAGGAAAGTATGCAAAAATGAGGAGTGCCCACACTAATGATGTAAAACAATTAACAGAGGCAGTGCAAAAAATAGCCCAAGAATGCATAGTAATATGGGGAAAGACTCCTAAATTTAGACTACCCATACAAAAGGAAACATGGGAAGCATGGTGGAAAGAATATTGGCAGGCCACCTGGATTCCTGAGTGGGAGTTTGTCAATACCCCCCCCTTAGTTAAATTATGGTACCAGTTAGAGAAGGAACCCATACTAGGAGCAGAAACTTTCTATGTAGATGGGGCAGCTAATAGAGAGACCAAATTAGGAAAAGCAGGATATGTTACTGACAAAGGAAGACAGAAAGTAGTCTCTCTAACTGACACAACAAATCAGAAGACTGAGTTACAAGCCATTAATCTAGCTTTGCAGGATTCGGGATTAGAAGTAAACATAGTAACAGATTCACAATATGCCTTAGGAATCATTCAGGCACAACCAGATAAAAGTGAATCAGAATTAGTCAGTCAAATAATAGAGCAGTTAATAAAAAAGGAAAAGGTCTACCTAGCATGGGTACCAGCACACAAGGGGATTGGAGGAAATGAGCAAGTAGATAAATTGGTCAGTAATGGAATCAGGAAAGTATTATTTTTGGATGGAATAGATAAGGCTCAAGAAGAACATGAAAAATACCACAACAATTGGAGAGCAATGGCTAGTGATTTTAACCTGCCACCTGTGGTAGCGAAAGAAATAGTAGCTAGCTGTGATAAATGTCAGCTAAAAGGAGAAGCCATGCATGGACAAGTAGACTGTAGTCCAGGAATATGGCAACTAGATTGTACACATCTAGAAGGAAAAGTTATCCTGGTAGCAGTTCATGTAGCCAGTGGCTATATAGAAGCAGAAGTGATCCCAGCAGAAACAGGGCAGGAAACAGCCTACTTTATCTTAAAATTAGCAGGAAGATGGCCAGTAAAAGTAGTACATACAGACAATGGCAGCAATTTCACCAGTTCTGCAGTTAAGGCCGCCTGTTGGTGGGCAGGCGTTAAGCAGGAATTTGGAATTCCCTACAATCCCCAAAGTCAAGGAGTAGTGGAATCTATGAATAAAGAATTAAAGAAAATTATAGGACAGGTAAGAGATCAAGCTGAACATCTTAAGACAGCAGTACAAATGGCAGTATTCATTCACAATTTTAAAAGAAAAGGGGGGATTGGGGGGTACAGTGCAGGGGAAAGAATAATAGACATAATAGCAACAGACTTACAAACTAAAGAATTACAAAAACAAATCATAAAAATTCAAAATTTTCGGGTTTATTACAGGGACAGCAGAGATCCAATTTGGAAAGGACCAGCAAAGCTTCTCTGGAAAGGTGAAGGGGCAGTAGTAATACAAGATAATAGTGACATAAAGGTAGTACCAAGAAGAAAAGTAAAGATCATTAGGGATTATGGAAAACAGATGGCAGGTGATGATTGTGTGGCAAGTAGACAGGATGAGGATTAGCACTTGGAAAAGTTTAGTAAAACACCATATGTATGTTTCAAAGAAAGCTCAAGGATGGTTGTATAGACATCACTATGACGGCCCTCACCCAAAAATAAGTTCAGAAATACACATCCCATTAGGAGACGCTAGACTGGTAGTAAAAACATATTGGGGCCTGCATACAGGAGAAAGAGAATGGCATTTGGGTCAAGGAGTCTCCATAGAATGGAGAAAAAGGAGATATAGCACACAAGTAGACCCTGGCCTAGCAGACCAACTAATTCATATGTATTATTTTGATTGTTTTGCAGAATCTGCTATAAGAAAAGCCATATTAGGACAATTAGTTAGTCCTAGGTGTGAATATCAAGCAGGACATAACAAGGTAGGATCCTTACAGTATTTGGCACTAACAGCATTAATAAAACCAGAAAAAACAAAGCCACCTTTGCCTAGTGTTAGGAAGCTAACAGAAGATAGATGGAACAAGCCCCAGAAGACCAAGGGCCACAGAGGGAGCCGAACAATGAATGGACATTAGAGCTTTTAGAGGAACTTAAGAGTGAAGCTGTTAGACATTTTCCTAGGATATGGCTCCATAGTTTAGGACAATATATCTATGAAACTTATGGGGATACATGGGCAGGAGTTGAAGCTCTAATAAGAACCCTGCAACAACTACTGTTTATTCATTTCAGAATTGGGTGTCAACATAGCAGAATAGGCATTATTCAACAGAGAAGACCAAGAAATGGACCCCGTAGATCCTAACTTAGAGCCCTGGAACCATCCAGGATGTAAGCCTAGGACTCCTTGTAACAATTGCTATTGTAAAAAGTGTTGCTATCATTGCCAAAAGTGCTTCTTAACGAAAGGCTTAGGCATCTCATATGGCAGGAAGAAGCGGAGACAGCGACGAAGAGCTCCTCCGGACGATCAGGCTCATCAAGATCCTATACCAAAGCAGTGAGTAATCTATGTAATGCAATCTTTAGAGATATTAGCAATAGTAGCATTAGTAGTAGCGCTAATACTAGCAATAGTGGTGTGGACCATAGTATTTATAGAGTGGAAGAAAATAAAAAGGCAAAGAAAAGTAGACTGGTTAATTGATAGAATAAGAGAAAGAGCAGAAGATAGTGGCAATGAGAGTGAGGGAGATAGAGAGGAATTATCTATGCTTGTGGAGATGGGGCATCATGCTCCTTGGGATGTTGATGACATATAGTGTTGCAGAGAAGAAGTGGGTCACAGTGTATTATGGGGTACCTGTGTGGAAAGAAGCAACAACCACTCTATTTTGTGCATCAGATGCTAAATCATATAAAACAGAGGTACATAATATCTGGGCTACACATGCCTGTGTACCAACAGACCCCAACCCACGAGAAATAGAACTGGAAAATGTCACAGAAAACTTTAACATGTGGAAAAATAACATGGTGGAGCAGATGCATGAGGATATCATCAGTTTATGGGATCAAAGCCTAAAACCATGTGTAAAATTAACCCCACTCTGTGTCACTTTAAACTGCACTGATGCAAGGAGGAATGAGACTAGGAATAATACAGGAATGGAAAACAATGATCAAATAGAAATGAAAAACTGCTCTTTCAATATAACCACAAAATTAATAGATAAGAAGAAGCAAGTACATGCACTTTTTTATAGACTTGATGTGGTACAAATAGATAATGAGACTAGTAATAGCAACTATAGCAACTATAGATTAATAAATTGCAATACCTCAGCCATTACACAGGCTTGTCCAAAGGTAACTTTTGAGCCAATTCCCATACATTATTGTGCCCCAGCTGGTTTTGCAATTCTAAAGTGTAGAGATAAGAAGTTCAATGGAACAGGACCATGCAAAAATGTCAGCACAGTACAATGCACACATGGAATTAGGCCAGTAGTGTCAACCCAACTGCTGTTGAATGGCAGTCTAGCAGAAGAAGAGATAATAATTAGATCTGAAAATCTCACAAACAATGCTAAAACCCTAATAGTACAGCTTAATGAGTCTGTAGAAATTAATTGTACAAGGCCCTACTACAACCAGATAAGACAAAGAACATCTATAGGACAAGGGCAAGCACTCTATACAACAAGAGTAACAGGAGATATAAGAAAAGCATATTGCAATATTAGTAAAGCAGGATGGAATAAAACTTTACAGCAGGTAGCAAAAAAATTAGGAGACCTCTTTAACCAGACAACAATAATTTTTAAACCATCCTCGGGAGGAGACCCAGAAATTACAACACATAGCTTTAATTGTGGAGGGGAATTTTTCTACTGCAATACATCAAAACTGTTTAACAGTGCATGGAATGACAGTACATGGAATATAGGGAATAATGATACAGGGTCAGATAATGGCCCATGCAGAATAAAACAAATTATAAACATGTGGCAGGGAGTAGGAAAAGCAATGTATGCCCCTCCCATCGAAGGATGGATCAATTGTACATCAAATATTACAGGGCTCTTACTGGTAAGGGATGGTGGTGGTGCAAATAGTAGTCAGAACGAGACCTTCAGACCTCAAGGAGGAGATATGAGAGACAATTGGAGAAGTGAATTATACAAGTATAAAGTAGTAAAAATTGAACCACTAGGAATAGCACCCACCAAGGCAAAGAGAAGAGTGGTGGAAAGAGAAAAAAGAGCAATAGGACTAGGAGCTATGTTCCTTGGGTTCTTGGGAGCAGCAGGAAGCACGATGGGCGCAGCGTCATTGACGCTGACGGTACAGGCCAGACAATTATTGTCTGGTATAGTGCAACAGCAAAACAATTTGCTGATGGCTATAGAGGCGCAACAGCATCTGTTGCAACTCACAGTCTGGGGCATTAAACAGCTCCAGGCAAGAATCCTGGCTGTGGAAAGATACCTACAGGATCAACAGCTCCTAGGAAGTTGGGGGTGCTCTGGAAGACACATTTGCACCACTACTGTGCCCTGGAACTCTAGTTGGAGTAATAAATCTATAGATGACATTTGGAATAACATGACCTGGATGGAGTGGGAAAAAGAAATTGACAATTACACAGGTGTAATATACAGATTAATTGAGGAATCGCAAACCCAGCAAGAAAAGAATGAACAAGAACTATTGCAATTGGACAAATGGGCAAGTTTGTGGAATTGGTTTAGCATAACAAAATGGCTGTGGTATATAAAAATATTCATAATGATAGTAGGAGGCTTAATAGGGTTAAGAATAGTTTTTACTGTGCTTTCTTTAGTAAATAGAGTTAGGCAGGGATACTCACCTCTATCGTTTCAGACCCTCTTCCCAGCCCCGAGGGGACCCGACAGGCCCGAAGAAATAGAAGAAGGAGGTGGAGAGCAAGGCAGAGGCAGATCCACTCGATTGGTGAACGGATTCTCAACACTTATCTGGGACGATCTGAGGAACCTGTGCCTCTTCAGCTACCACCGCTTGAGAGACTTAATCTTAATTGCAACGAGGATTGTGGAACTTCTGGGACGCAGGGGGTGGGAAGCCATCAAATATCTGTGGAATCTCCTGCAGTATTGGAGTCAGGAACTGAAGACTAGTGCTATTAGCTTGTTTAACGCTACAGCAGTAGCAGTAGCTGAGGGGACAGATAGGGTTATAGAAGTAGTACAAAGATTTTTTAGAGGTATTCTTAACGTACCCACACGAATAAGACAGGGCTTGGAAAGGGCGTTACTATAAAATGGGTGGCAAATGGTCAAAAAGTAGTAAAGTTGGGTGGCCTGCTGTAAGGGACAGAATACAAAGAACTAGTCCAGCAGCAGAGGGGGTGGGAGCAGCATCTCGAGACCTGGAAAAACATGGGGCAATCACAAGTAGCAATACAGCAGAGATTAATCCTGACTGTGCCTGGCTAGAAGCACAAGAAGAGGAAGAGGAGGTGGGTTTTCCAGTTAGACCTCAGGTACCGTTAAGACCAATGACTTACAAGGCAGCTTTTGATCTAAGCCACTTTTTAAAAGAAAAGGGGGGACTGGAAGGGTTAATTTACTCCAAGAAAAGACAAGAAATCCTTGATCTTTGGGTCTACCACACACAAGGCTATTTCCCTGATTGGCAAAACTACACACCAGGGCCAGGGATTAGATACCCACTGACCTTTGGTTGGTGCTTCGAGCTAGTACCAGTGGATCCAGAGGAGGTAGAAAAGGCCAATAAAGGAGAGAACAACTGCTTGTTACACCCTATGAGCCAGCATGGAATGGAGGACCCGGAGAGAGAGGTGTTAGTGTGGAGATTTAACAGCAGACTAGCATTTGAACACAAGGCCCGAATACAGCATCCGGAGTTCTACAAAGACTGCTGACACCAGTACTACAAGGACTGCTGACACCGAGTTTGCTACAAGGGACTTTCCGCTGGGGACTTTCCAGGGAGGCGTAACCGGGCGGGACAGGGGAGTGGCTGACCCTCAGATGCTGCATATAAGCAGCTGCTTGTTGCCTGTACTGGGTCTCTCTGGTTAGACCAGATTTGAGCCTGAGAGCTCTCTGGCTAGCTAGGGAACCCACTGCT
>D.UG.98.98UG57130_AF484504_F2.CM.02.02CM_0016BBY_AY371158
GCGAGAGCGTCAGTATTAAGCGGGGGAAAATTAGATGCATGGGAAAAAATTCGGTTACGGCCAGGAGGAAAGAAAAAATATAGACTGAAACATATAGTATGGGCAAGCAGGGAGTTAGAACGATTCGCACTTAATCCTGGCCTTTTAGAGACATCAGAAGGCTGTAAACAAATAATAGGACAGCTACAACCAGCTGTTAAGACAGGATCAGAAGAACTTAAATCATTATTTAATACAGTAGCAACCCTCTATTGTGTACATGAGAGGATAGAGGTAAAGGACACCAAGGAAGCTTTAGAAAAAATAGAGGAAGAACAAACCAAAAGTAAGAAAAAGGCACAGCAAGCAACAGCTGACACAAGAAACAGCAGCCAGGTCAGCCAAAATTATCCTATAGTGCAAAACCTACAGGGACAAATGGTACACCAGGCCATATCACCTAGAACTTTAAATGCATGGGTAAAAGTAATAGAAGAAAAGGCTTTCAGCCCAGAAGTAATACCCATGTTTACAGCATTATCAGAAGGAGCCACCCCGCAAGACCTAAACACCATGCTGAACACAGTAGGGGGGCATCAAGCAGCCATGCAAATGTTAAAAGAGACCATCAATGAGGAAGCTGCAGAATGGGATAGGCTACATCCACCGCAGGCAGGGCCTGTTGCACCAGGCCAGATGAGGGAACCAAGGGGAAGTGATATAGCAGGAACTACTAGCACCCTTCAGGAACAAATAGGGTGGATGACAAGCAATCCGCCTGTCCCAGTAGGAGAGATCTATAAAAGATGGATAATCCTGGGGTTAAATAAAATAGTAAGAATGTATAGTCCTGTCAGCATTTTGGACATAAGACAAGGTCCAAAGGAACCCTTTAGAGATTATGTAGATCGGTTCTATAAAACTCTAAGAGCCGAGCAAGCTTCACAAGATGTAAAAAATTGGATGACCGAAACCTTGTTGGTCCAAAATGCAAACCCAGATTGTAAAACTATCTTAAAAGCACTGGGACCAGGGGCTACATTAGAAGAAATGATGACAGCATGTCAGGGAGTAGGGGGACCCAGTCATAAAGCAAGAGTTTTGGCTGAGGCAATGAGCCAAGCAACAAATTTGAATGGTGCCGCAATGATGCAGAGAAGCAATTTTAAGGGCCCAAGGAAAATTGTTAAGTGTTTCAACTGTGGCAAAGAAGGGCACATAGCAAGAAATTGCAAGGCTCCTAGGAAAAAGGGCTGTTGGAAATGTGGCAGGGAAGGACACCAAATGAAAGATTGCACTGAAAGACAGGCTAATTTTTTAGGGAAAATTTGGCCTTCCCACAAGGGGAGGCCAGGCAACTTCCTTCAAAACAGACCAGAGCCAACAGCCCCACCAGCAGAGAGCTTCGGGTTTGGGGAGGAGATAACCCCCTCCCCGAAGCAGGAGCAGAAAGACAAGGGACTGTATCCTCCCTTGACTTCCCTCAAATCACTCTTTGGCAACGACCCGTAGTCACAATAAAGGTAGAGGGGCAACTAAGGGAGGCTCTATTAGATACAGGGGCAGATGATACAGTATTAGAAGATATAAATTTGTCAGGAAAATGGAAACCAAGAATGATAGGGGGAATTGGAGGTTTTATCAAAGTAAGACAGTATGATCAAATACCCATAGAAATCTGCGGATATAAAGCTATAGGTACAGTATTAATAGGACCTACACCTGTCAACATAATTGGAAGAAATTTGTTGACTCAGATTGGCTGCACTTTAAATTTTCCAATTAGTCCTATTGAAACTGTACCAGTAAAATTAAAGCCAGGGATGGATGGCCCAAAAGTTAAACAATGGCCATTGACAGAAGAAAAAATAAAAGCACTAACAGAAATTTGTGCAGACATGGAAAAAGAAGGAAAAATTTCAAGAATTGGGCCTGAAAATCCATACAATACTCCAGTATTTGCCATAAAGAAAAAAGACAGTACTAAGTGGAGAAAATTAGTAGATTTCAGAGAACTTAATAAGAGAACTCAAGATTTCTGGGAAGTTCAACTAGGAATACCACATCCTGCAGGGCTAAAGAAGAAAAAATCAGTAACAGTACTGGATGTGGGTGATGCATATTTTTCAGTTCCCTTAGATATAGACTTTAGAAAGTATACAGCATTCACCATACCTAGTACAAACAATGAGGCACCAGGAATTAGATATCAGTACAATGTGCTTCCACAGGGATGGAAAGGATCACCAGCAATATTCCAATGTAGCATGACAAAAATCTTAGAACCCTTTAGAAAACAAAATCCAGAAATAGTTATCTATCAATACATGGATGATTTGTATGTAGGATCTGACTTAGAAATAGGGCAGCATAGAACAAAAATAGATGAATTAAGGGAACATCTATTAAGGTGGGGATTTACCACACCAGACAAAAAACATCAGAAAGAACCTCCATTTCTTTGGATGGGTTATGAACTCCATCCTGATAAATGGACAGTGCAGCCTATAAAGCTGCCAGAAAAAGAAAGCTGGACTGTCAATGATATACAGAAGTTAGTGGGAAAATTAAATTGGGCAAGCCAGATTTATCCAGGAATTAGAGTAAGACACTTATGTAAACTCCTTAGGGGAGCCAAAGCACTGACAGAAGTAATACCACTGACAAAAGAAGCAGAATTAGAACTGGCAGAAAACAAGGAAATTCTAAAAGAACCAGTACATGGAGTGTATTATGACCCATCAAAAGACTTAATAGCAGAAGTACAGAAACAAGGGCAAGACCAATGGACATATCAAATTTATCAAGAGCCATTTAAAAATCTGAAAACAGGAAAGTATGCAAAAATGAGGAGTGCCCACACTAATGATGTAAAACAATTAACAGAGGCAGTGCAAAAAATAGCCCAAGAATGCATAGTAATATGGGGAAAGACTCCTAAATTTAGACTACCCATACAAAAGGAAACATGGGAAGCATGGTGGAAAGAATATTGGCAGGCCACCTGGATTCCTGAGTGGGAGTTTGTCAATACCCCCCCCTTAGTTAAATTATGGTACCAGTTAGAGAAGGAACCCATACTAGGAGCAGAAACTTTCTATGTAGATGGGGCAGCTAATAGAGAGACCAAATTAGGAAAAGCAGGATATGTTACTGACAAAGGAAGACAGAAAGTAGTCTCTCTAACTGACACAACAAATCAGAAGACTGAGTTACAAGCCATTAATCTAGCTTTGCAGGATTCGGGATTAGAAGTAAACATAGTAACAGATTCACAATATGCCTTAGGAATCATTCAGGCACAACCAGATAAAAGTGAATCAGAATTAGTCAGTCAAATAATAGAGCAGTTAATAAAAAAGGAAAAGGTCTACCTAGCATGGGTACCAGCACACAAGGGGATTGGAGGAAATGAGCAAGTAGATAAATTGGTCAGTAATGGAATCAGGAAAGTATTATTTTTGGATGGAATAGATAAGGCTCAAGAAGAACATGAAAAATACCACAACAATTGGAGAGCAATGGCTAGTGATTTTAACCTGCCACCTGTGGTAGCGAAAGAAATAGTAGCTAGCTGTGATAAATGTCAGCTAAAAGGAGAAGCCATGCATGGACAAGTAGACTGTAGTCCAGGAATATGGCAACTAGATTGTACACATCTAGAAGGAAAAGTTATCCTGGTAGCAGTTCATGTAGCCAGTGGCTATATAGAAGCAGAAGTGATCCCAGCAGAAACAGGGCAGGAAACAGCCTACTTTATCTTAAAATTAGCAGGAAGATGGCCAGTAAAAGTAGTACATACAGACAATGGCAGCAATTTCACCAGTTCTGCAGTTAAGGCCGCCTGTTGGTGGGCAGGCGTTAAGCAGGAATTTGGAATTCCCTACAATCCCCAAAGTCAAGGAGTAGTGGAATCTATGAATAAAGAATTAAAGAAAATTATAGGACAGGTAAGAGATCAAGCTGAACATCTTAAGACAGCAGTACAAATGGCAGTATTCATTCACAATTTTAAAAGAAAAGGGGGGATTGGGGGGTACAGTGCAGGGGAAAGAATAATAGACATAATAGCAACAGACTTACAAACTAAAGAATTACAAAAACAAATCATAAAAATTCAAAATTTTCGGGTTTATTACAGGGACAGCAGAGATCCAATTTGGAAAGGACCAGCAAAGCTTCTCTGGAAAGGTGAAGGGGCAGTAGTAATACAAGATAATAGTGACATAAAGGTAGTACCAAGAAGAAAAGTAAAGATCATTAGGGATTATGGAAAACAGATGGCAGGTGATGATTGTGTGGCAAGTAGACAGGATGAGGATTAGCACTTGGAAAAGTTTAGTAAAACACCATATGTATGTTTCAAAGAAAGCTCAAGGATGGTTGTATAGACATCACTATGACGGCCCTCACCCAAAAATAAGTTCAGAAATACACATCCCATTAGGAGACGCTAGACTGGTAGTAAAAACATATTGGGGCCTGCATACAGGAGAAAGAGAATGGCATTTGGGTCAAGGAGTCTCCATAGAATGGAGAAAAAGGAGATATAGCACACAAGTAGACCCTGGCCTAGCAGACCAACTAATTCATATGTATTATTTTGATTGTTTTGCAGAATCTGCTATAAGAAAAGCCATATTAGGACAATTAGTTAGTCCTAGGTGTGAATATCAAGCAGGACATAACAAGGTAGGATCCTTACAGTATTTGGCACTAACAGCATTAATAAAACCAGAAAAAACAAAGCCACCTTTGCCTAGTGTTAGGAAGCTAACAGAAGATAGATGGAACAAGCCCCAGAAGACCAAGGGCCACAGAGGGAGCCGAACAATGAATGGACATTAGAGCTTTTAGAGGAACTTAAGAGTGAAGCTGTTAGACATTTTCCTAGGATATGGCTCCATAGTTTAGGACAATATATCTATGAAACTTATGGGGATACATGGGCAGGAGTTGAAGCTCTAATAAGAACCCTGCAACAACTACTGTTTATTCATTTCAGAATTGGGTGTCAACATAGCAGAATAGGCATTATTCAACAGAGAAGACCAAGAAATGGACCCCGTAGATCCTAACTTAGAGCCCTGGAACCATCCAGGATGTAAGCCTAGGACTCCTTGTAACAATTGCTATTGTAAAAAGTGTTGCTATCATTGCCAAAAGTGCTTCTTAACGAAAGGCTTAGGCATCTCATATGGCAGGAAGAAGCGGAGACAGCGACGAAGAGCTCCTCCGGACGATCAGGCTCATCAAGATCCTATACCAAAGCAGTGAGTAATCTATGTAATGCAATCTTTAGAGATATTAGCAATAGTAGCATTAGTAGTAGCGCTAATACTAGCAATAGTGGTGTGGACCATAGTATTTATAGAGTGGAAGAAAATAAAAAGGCAAAGAAAAGTAGACTGGTTAATTGATAGAATAAGAGAAAGAGCAGAAGATAGTGGCAATGAGAGTGAGGGAGATAGAGAGGAATTATCTATGCTTGTGGAGATGGGGCATCATGCTCCTTGGGATGTTGATGACATATAGTGTTGCAGAGAAGAAGTGGGTCACAGTGTATTATGGGGTACCTGTGTGGAAAGAAGCAACAACCACTCTATTTTGTGCATCAGATGCTAAATCATATAAAACAGAGGTACATAATATCTGGGCTACACATGCCTGTGTACCAACAGACCCCAACCCACGAGAAATAGAACTGGAAAATGTCACAGAAAACTTTAACATGTGGAAAAATAACATGGTGGAGCAGATGCATGAGGATATCATCAGTTTATGGGATCAAAGCCTAAAACCATGTGTAAAATTAACCCCACTCTGTGTCACTTTAAACTGCACTGATGCAAGGAGGAATGAGACTAGGAATAATACAGGAATGGAAAACAATGATCAAATAGAAATGAAAAACTGCTCTTTCAATATAACCACAAAATTAATAGATAAGAAGAAGCAAGTACATGCACTTTTTTATAGACTTGATGTGGTACAAATAGATAATGAGACTAGTAATAGCAACTATAGCAACTATAGATTAATAAATTGCAATACCTCAGCCATTACACAGGCTTGTCCAAAGGTAACTTTTGAGCCAATTCCCATACATTATTGTGCCCCAGCTGGTTTTGCAATTCTAAAGTGTAGAGATAAGAAGTTCAATGGAACAGGACCATGCAAAAATGTCAGCACAGTACAATGCACACATGGAATTAGGCCAGTAGTGTCAACCCAACTGCTGTTGAATGGCAGTCTAGCAGAAGAAGAGATAATAATTAGATCTGAAAATCTCACAAACAATGCTAAAACCCTAATAGTACAGCTTAATGAGTCTGTAGAAATTAATTGTACAAGGCCCTACTACAACCAGATAAGACAAAGAACATCTATAGGACAAGGGCAAGCACTCTATACAACAAGAGTAACAGGAGATATAAGAAAAGCATATTGCAATATTAGTAAAGCAGGATGGAATAAAACTTTACAGCAGGTAGCAAAAAAATTAGGAGACCTCTTTAACCAGACAACAATAATTTTTAAACCATCCTCGGGAGGAGACCCAGAAATTACAACACATAGCTTTAATTGTGGAGGGGAATTTTTCTACTGCAATACATCAAAACTGTTTAACAGTGCATGGAATGACAGTACATGGAATATAGGGAATAATGATACAGGGTCAGATAATGGCCCATGCAGAATAAAACAAATTATAAACATGTGGCAGGGAGTAGGAAAAGCAATGTATGCCCCTCCCATCGAAGGATGGATCAATTGTACATCAAATATTACAGGGCTCTTACTGGTAAGGGATGGTGGTGGTGCAAATAGTAGTCAGAACGAGACCTTCAGACCTCAAGGAGGAGATATGAGAGACAATTGGAGAAGTGAATTATACAAGTATAAAGTAGTAAAAATTGAACCACTAGGAATAGCACCCACCAAGGCAAAGAGAAGAGTGGTGGAAAGAGAAAAAAGAGCAATAGGACTAGGAGCTATGTTCCTTGGGTTCTTGGGAGCAGCAGGAAGCACGATGGGCGCAGCGTCATTGACGCTGACGGTACAGGCCAGACAATTATTGTCTGGTATAGTGCAACAGCAAAACAATTTGCTGATGGCTATAGAGGCGCAACAGCATCTGTTGCAACTCACAGTCTGGGGCATTAAACAGCTCCAGGCAAGAATCCTGGCTGTGGAAAGATACCTACAGGATCAACAGCTCCTAGGAAGTTGGGGGTGCTCTGGAAGACACATTTGCACCACTACTGTGCCCTGGAACTCTAGTTGGAGTAATAAATCTATAGATGACATTTGGAATAACATGACCTGGATGGAGTGGGAAAAAGAAATTGACAATTACACAGGTGTAATATACAGATTAATTGAGGAATCGCAAACCCAGCAAGAAAAGAATGAACAAGAACTATTGCAATTGGACAAATGGGCAAGTTTGTGGAATTGGTTTAGCATAACAAAATGGCTGTGGTATATAAAAATATTCATAATGATAGTAGGAGGCTTAATAGGGTTAAGAATAGTTTTTACTGTGCTTTCTTTAGTAAATAGAGTTAGGCAGGGATACTCACCTCTATCGTTTCAGACCCTCTTCCCAGCCCCGAGGGGACCCGACAGGCCCGAAGAAATAGAAGAAGGAGGTGGAGAGCAAGGCAGAGGCAGATCCACTCGATTGGTGAACGGATTCTCAACACTTATCTGGGACGATCTGAGGAACCTGTGCCTCTTCAGCTACCACCGCTTGAGAGACTTAATCTTAATTGCAACGAGGATTGTGGAACTTCTGGGACGCAGGGGGTGGGAAGCCATCAAATATCTGTGGAATCTCCTGCAGTATTGGAGTCAGGAACTGAAGACTAGTGCTATTAGCTTGTTTAACGCTACAGCAGTAGCAGTAGCTGAGGGGACAGATAGGGTTATAGAAGTAGTACAAAGATTTTTTAGAGGTATTCTTAACGTACCCACACGAATAAGACAGGGCTTGGAAAGGGCGTTACTATAAAATGGGTGGCAAATGGTCAAAAAGTAGTAAAGTTGGGTGGCCTGCTGTAAGGGACAGAATACAAAGAACTAGTCCAGCAGCAGAGGGGGTGGGAGCAGCATCTCGAGACCTGGAAAAACATGGGGCAATCACAAGTAGCAATACAGCAGAGATTAATCCTGACTGTGCCTGGCTAGAAGCACAAGAAGAGGAAGAGGAGGTGGGTTTTCCAGTTAGACCTCAGGTACCGTTAAGACCAATGACTTACAAGGCAGCTTTTGATCTAAGCCACTTTTTAAAAGAAAAGGGGGGACTGGAAGGGTTAATTTACTCCAAGAAAAGACAAGAAATCCTTGATCTTTGGGTCTACCACACACAAGGCTATTTCCCTGATTGGCAAAACTACACACCAGGGCCAGGGATTAGATACCCACTGACCTTTGGTTGGTGCTTCGAGCTAGTACCAGTGGATCCAGAGGAGGTAGAAAAGGCCAATAAAGGAGAGAACAACTGCTTGTTACACCCTATGAGCCAGCATGGAATGGAGGACCCGGAGAGAGAGGTGTTAGTGTGGAGATTTAACAGCAGACTAGCATTTGAACACAAGGCCCGAATACAGCATCCGGAGTTCTACAAAGACTGCTGACACCAGTACTACAAGGACTGCTGACACCGAGTTTGCTACAAGGGACTTTCCGCTGGGGACTTTCCAGGGAGGCGTAACCGGGCGGGACAGGGGAGTGGCTGACCCTCAGATGCTGCATATAAGCAGCTGCTTGTTGCCTGTACTGGGTCTCTCTGGTTAGACCAGATTTGAGCCTGAGAGCTCTCTGGCTAGCTAGGGAACCCACTGCT
>D.UG.99.99UGE13613_AF484515_G.CM.96.96CMABB55_AY772535
GCGAGAGCGTCAGTATTAAGCGGGGGAAAATTAGATGAATGGGAAAAAATTCAGTTACGGCCAGGGGGAAGCAAAAAATATAAACTAAAACATATAGTATGGGCAAGCAGGGAGCTAGAACGATTTGCACTTAATCCTGGCCTTTTAGAAACATCAGAAGGCTGTAAACAAATAATGGGACAGCTACAACCATCTATTCAGACAGGATCAGAGGAAATTAAATCATTATATAATACAGTAGCAACCCTCTATTGTGTACATGAAGGGATAAAAGTAACAAACACCAAGGAAGCTTTAGATAAAATAGAGGAAGAACAAACCAAAAGTAAGAAAAAAGCACAGCAAGCAACAGCTGACACAAGAAACAACAGCCAGGTCAGCCAAAATTATCCTATAGTGCAAAACCCACAGGGGCAAATGATATACCAGTCCCTGTCACCTAGAATTTTGAACGCATGGGTAAAAGTAATAGAGGAGAAGGCTTTCAGCCCAGAAGTAATACCCATGTTTTCAGCATTATCAGAAGGAGCCACCCCACAAGATTTAAACACCATGCTAAATACAGTGGGGGGACATCAAGCAGCCATGCAAATGTTAAAAGAAACCATCAATGAGGAAGCTGCAGAATGGGATAGGCTACATCCAGTGCAGGCAGGGCCTATTGCACCAGGCCAAATGAGAGAACCAAGGGGAAGTGATATAGCAGGAACCACTAGTAACCTTCAGGAACAAATAGCATGGATGACAAGCAATCCACCTATCCCAGTAGGAGAAATCTATAAAAGATGGATAATCTTAGGATTAAATAAAATAGTAAGAATGTATAGCCCTGTCAGCATTTTGGACATAAGACAAGGACCAAAGGAGCCTTTTAGAGACTATGTAGATCGGTTCTATAAAACTCTAAGAGCCGAGCAAGCTTCACAGGATGTAAAAAATTGGATGACAGAAACCTTGTTGGTCCAGAATGCAAACCCAGATTGTAAAACCATCTTAAAAGCATTGGGACCAGGGGCTACATTAGAAGAAATGATGACAGCATGTCAAGGAGTGGGGGGACCTGGTCATAAAGCAAGAGTTTTGGCTGAGGCAATGAGCCAAGCAACAAATGGAAGTGCTATTATGATGATGCAGAGAGGTAATTTTAAGGGCTCAAAGAGAATCATTAAGTGTTTCAACTGTGGCAGAGAAGGGCACATAGCAAAAAATTGCAGGGCTCCTAGGAAAAAGGGTTGTTGGAAATGTGGAAAGGAAGGACACCAAATGAAAAATTGCACTGAAAGACAGGCTAATTTTTTAGGGAGATTTTGGCCTTCCCAGAAGGGAAGGCCAGGGAACTTCCTTCAGAGCAGACCAGAGCCAACAGCCCCACCAGCGGAGAGCTTCGGGTTTGGGGAGGAGATAACACCCTCTCAGAAACAGGAGCAGAAAGACAAGGAGCTGTATCCCTTAACCTCCCTCAAATCACTCTTTGGCAACGACCCCTTGTCACAGTAAAGATAGGGGGACAGCTAAAGGAAGCTCTCTTAGATACAGGAGCAGATGATACAGTAGTAGAAGAAATGAATTTGCCAGGAAAATGGAAACCAAAAATGATAGGGGGAATTGGAGGCTTTATCAAAGTAAGACAGTATGATCAAATACTTGTAGAAATCTGTGGACATAAAGCTATAGGTACAGTATTAGTAGGACCTACACCTGTCAACATAATTGGAAGAAATTTGTTGACTCAGATTGGTTGCACTTTAAATTTTCCAATTAGTCCTATTGAAACTGTACCAGTAAAATTAAAACCAGGGATGGATGGCCCAAAAGTTAAACAATGGCCATTGACAGAAGAGAAAATAAAAGCATTAACAGAAATTTGTACAGACATGGAAAAGGAAGGAAAAATTTCAAGAATTGGGCCTGAAAATCCATACAACACTCCAATATTTGCCATAAAGAAAAAAGACAGTACTAAATGGAGAAAATTAGTAGATTTCAGAGAGCTCAATAAAAGAACTCAAGATTTCTGGGAAGTTCAACTAGGAATACCACATCCTGCAGGGCTAAAAAAGAAAAGGTCAGTAACAGTACTGGATGTGGGTGATGCATATTTTTCAGTTCCCTTATATGAGGACTTTAGAAAATATACCGCATTCACCATACCTAGCATAAACAATGAGACACCAGGCATTAGGTATCAGTACAATGTGCTTCCACAAGGATGGAAAGGATCACCGGCAATATTCCAAAGTAGCATGATAAAAATCTTAGAACCTTTTAGAAAGCAAAATCCAGAAATAGTTATCTATCAATACATGGATGATTTGTATGTAGGATCTGACTTAGAAATAGAGCAGCATAGAATAAAAATAGAGAAATTAAGGGAACATCTATTAAAGTGGGGATTTACCACACCAGACAAAAAGCATCAGAAAGAACCTCCATTTCTTTGGATGGGTTATGAACTCCATCCTGATAAATGGACAGTACAGCCTATAAAACTGCCAGAAAAGGAAAGCTGGACTGTCAATGATATACAGAAGTTAGTGGGAAAATTAAATTGGGCAAGCCAGATTTATTCAGGAATTAAAGTAAGACAATTATGCAAGTGCCTTAGGGGAGCCAAGGCACTGACAGCAGTAGTACCACTGACGGAAGAAGCAGAATTAGAGCTGGCAGAAAACAGGGAAATTCTAAAAGAATCAGTACATGGAGTGTATTATGACCCATCAAAAGACTTAATAGCAGAAATACAGAAACAAGGGCAAGACCAATGGACATATCAGATATATCAAGAGCAATATAAAATTCTGAAAACAGGAAAGTATGCAAAAATAAGGGGTACCCACACTAATGACGTAAAACAATTAACAGCGGCAGTGCAAAAAGTAGCCCAAGAATGTATAGTGATATGGGGAAAGATTCCTAAATTTAGACTACCCATACAAAAGGAAACATGGGACACATGGTGGACAGAGTATTGGCAGGCCACCTGGATTCCTGAGTGGGAGTTTGTCAATACCCCTCCTTTAGTTAAATTATGGTATCAGTTAGAGAAGGAACCCATAGTAGGAGCAGAAACTTTCTATGTAGATGGGGCAGCTAATAGAGAGACTAAATTAGGAAAAGCAGGATATGTTACTGACAGAGGAAGACAGAAAGTTGTCTCTCTAACTGATACAACAAATCAGAAGACTGAATTACAAGCCATTAATCTAGCTCTGCAGGATTCAGGATTAGAAGTAAACATAGTAACAGACTCACAATATGCATTAGGAATCATTCAAGCACAACCAGATAAGAGTGAATCAGAGTTAGTCAGTCAGATAATAGAGCAGTTAATAAAAAAGGAAAAGGTCTACCTATCATGGGTACCAGCACACAAGGGGATTGGAGGAAATGACCAAGTAGATAAATTAGTCAGTAATGGAATCAGAAAAATACTATTCTTGGATGGAATAGATAAGGCCCAAGAAGAACATGAGAAATACCACAACAATTGGAGAGCAATGGCTAGTGATTTTAACCTGCCACCTGTGGTAGCAAAAGAAATAGTAGCTAGCTGTGATAAATGTCAGCTAAAAGGAGAAGCCTTGCATGGACAAGTAGACTGTAGTCCAGGAATATGGCAATTAGATTGTACACATTTAGAAGGAAAAGTTATCCTGGTAGCAGTCCATGTAGCCAGTGGCTATATAGAAGCAGAAGTTATTCCAGCAGAAACAGGGCAGGAAACGGCCTACTTTCTCTTGAAATTAGCAGGAAGATGGCCAGTAAAAGTAGTACATACAGACAATGGCAGTAATTTCACCAGCACTGTAGTTAAGGCCGCCTGTTGGTGGGCAGGCATCAAGCAGGAATTTGGAATTCCCTACAATCCTCAAAGTCAAGGAGTAGTAGAATCTATGAATAAAGAATTAAAAAGAATTATAGGACAAGTAAGAGATCAAGCTGAACATCTTAAGACAGCAGTACAAATGGCAGTATTCATCCACAATTTTAAAAGAAAAGGGGGGATTGGGGGATACAGTGCAGGGGAAAGAATAATAGACATAATAGCAACAGACATACAAACTAAAGAATTACAAAAACAAATCACAAAAATTCAAAATTTTCGGGTTTATTACAGGGACAGCAGAGATCCAATTTGGAAAGGACCAGCAAAGCTTCTCTGGAAAGGTGAAGGGGCAGTAGTACTACAAGACAATAGTGAAATAAAGGTAGTACCAAGAAGAAAAGTAAAGATCATTAGGGATTATGGAAAACAGATGGCAGGCGATGATTGTGTGGCAAGTAGACAGGATGAGGATTAGAACATGGAAGAGTTTAGTAAAACACCATATCTATGTTTCAAAGAGAGCTCAAGGATGGTGGTATAGACATCACTATGACTGCCCAAATCCAAAAATAAGTTCAGAAGTACACATTCCATTAGGAGAAGCTAGACTGGTAGTAAAAACATATTGGGGTCTGCATACAGGAGAAAGAGAATGGCATTTGGGTCAGGGAGTCTCCATAGAATGGAGGAAAAGGAGATATAGCACACAAGTAGACCCTGGCCTGGCAGACCAACTAATTCATATGTACTATTTTGATTGTTTTGCAGAATCTGCTATAAGAAAAGCCATATTAGGACATATAGTTACTTCTAGGTGTAATTATCAAGCAGGACATAACAAGGTAGGATCTTTACAATATTTGGCACTAACAGCATTAATAACACCAAAAAAGATAAAACCACCTTTGCCTAGTATTAGGAAGCTGACAGAAGACAGATGGAACAAGCCCCAGAGGACCAAGGGCCACAGAGGGAGCCATACAATGAATGGACATTAGAGCTTTTAGAGGAGCTTAAGAGTGAAGCTGTTAGACACTTTCCTAGGATATGGCTTCAGGGCTTAGGACAATACATCTATGAAACTTATGGGGATACCTGGACAGGAGTTGAAGCTATAATAAGAATCCTCCAACAACTGCTGTTTATCCATTTCAGAATTGGGTGTCGACATAGCAGAATAGGCATTAATCTACGGAGAAGAATAAGAAATGGATCCAGTAGATCCTAACATAGAGCCCTGGAACCATCCAGGAAGTCAGCCTAAGACTCCTTGTAACAAGTGTTATTGTAAAAAGTGTTGCTATCATTGTCAAAATTGCTTCATAACGAAAGGCTTAGGCATCTCCTATGGCAGGAAGAAGCGGAGACAACGACGAAAGACTCCTCAAGGCGATCCAGCTAATCAAGATCCTATACCAAAGCAGTAAGTAGTAGTACATGTAATGCAATCTTTAGAGATATTAGCAATAGTAGCATTAGTAGTAGCGCTAATACTAGCAATAGTTGTGTGGACTATATTATTCATAGAGTGTAGAAGATTAAGAAAGCAAAGGAAAATAGACAGGTTAATTGATAGAATAAGAGACAGAGCAGAAGATAGTGGCAATGAGAGTGAGGGGGATAAAGAGGAATTATCAGCACTTGTGGAGATGGGGCACCATGCTCCTTGGGTTGTTGATGATATGTAATGCAGAACAGTTGTGGGTCACAGTTTATTATGGGGTACCTGTGTGGAAAGAAGCAACCACTACTCTATTCTGTGCATCAGATGCTAAAGCATATGAAAAAGAGGTACATAATATTTGGGCTACACATGCCTGTGTGCCAACAGACCCCAACCCACGAGAAATAAAACTAGAAAATGTCACAGAAGACTTTAACATGTGGAAAAATAACATGGTGGAGCAGATGCATGAGGATATAATCAGTTTATGGGATGAAAGCCTAAAACCATGTGTAAAATTAACCCCACTCTGTGTCACTTTAAACTGCACTGAATGGAAAGATGCAAAGGCCACTAATGATACAGGAGTGCAAAATGATACAGGAGTGCAAAACTGCTCTTTCAAGGTAACCACAGAACTAAAAGATAAGAAGACGCAAGTGCATGCACTTTTTTATAGGCTTGATGTAGTACAAATAGGTAATGATAATACTAGCTATAGATTAATAAATTGTAATACCTCAGCCATCACACAGGCGTGTCCAAAGGTAACCTTTGAGCCAATTCCCATACATTATTGTGCCCCAGCTGGATTTGCAATTCTAAAATGTAATGATAAGAAGTTCAATGGGACGGGTCCATGCAAAAATGTCAGCACAGTACAGTGTACACATGGGATTAGGCCAGTAGTGTCAACTCAACTGTTGTTGAATGGCAGTCTAGCAGAAGAAGAAATAATAATTAGATCTGAAAATCTCACAAATAATGCTAAAACCATAATAGTACAGTTTCATGAGTCTGTGTCAATTAATTGCACAAGGCCCTACAACAATACAAGACAAGGTACACATATAGGACCAGGGCGAACACTCTTCACAACAAGGATAATAGGAAATATAAGAAAGGCATATTGTAACATTAGTGAAGAACAATGGAATAAAACTTTACAACAGGTAGCTAAAAAATTAGGAAACCTTCTGAATAAAACAGCAATAAATTTTAGACCATCCTCGGGAGGGGACTTAGAAATTACAACACACAGCTTTAATTGTGGAGGGGAATTTTTCTACTGCAATACATCAGGACTGTTTAATAGTGAATGGAATGATACTACATGGAACGATAATAGTACAAGGACAGATGAGACAATCAAACTCCAGTGCAAAATAAAACAAATTATAAACATGTGGCAGGGAGTAGGAACAGCAATGTATGCTCCTCCCATTGAAGGACTAATCCAATGTAGATCAAATATTACAGGACTATTGTTGACAAGAGATGGTGGTGCAGATGAGAATAAGACTGAGACCTTCAGACCTGGAGGAGGAGATATGAGAGACAATTGGAGAAGTGAATTATACAAATATAAAGTAGTAAGAATTGAACCACTAGGTCTAGCACCCACCAGGGCAAAGAGAAGAGTGGTGGAAAGAGAAAAAAGAGCAATAGGACTAGGAGCTGTGTTCCTTGGGTTCTTGGGAGCAGCAGGAAGCACGATGGGCGCAGCGTCACTGACGCTGACGGTACAGGCCAGACAGTTATTGTCTGGTATAGTGCAACAGCAAAACAATTTGCTGAGGGCTATAGAGGCGCAACAGCATCTGTTGCAACTCACAGTCTGGGGCATTAAACAGCTCCAGGCAAGAGTCCTGGCTGTGGAAAACTACCTAAGGGATCAACAGCTCCTAGGAATTTGGGGTTGCTCTGGAAAACACATTTGCACCACTAATGTGCCCTGGAACTCTAGCTGGAGTAATAAATCTGTAGAGGAGATTTGGGATAACATGACCTGGAGGGATTGGGAGAGAGAAATTGACAATTACACAGGTTTAATATACAGCTTAATTGAAAGGTCACAAATCCAGCAAGAAAAGAATGAACAAGAACTATTGCAATTGGACAAATGGGCAAGTTTGTGGAATTGGTTTAGCATAACAAAATGGCTATGGTATATAAAAATCTTCATAATGATAGTAGGAGGCTTGATAGGTTTAAGAATAGTTTTTGCTGTGCTTTCGTTAGTAAATAGAGTTAGGCAGGGATATTCACCTCTGTCGTTTCAGACCCTCCTCCCAGCCCCGAGGGGACTCGACAGGCCCGAAGGAATAGAAGAAGAAGGTGGAGAGCAAGGCAGAGGCAGATCCATTCGATTGGTGAACGGATTCTTAGCACTTATCTGGGACGATTTGAGGAACCTGTGCCTCTTCAGCTACCACCACTTGAGAGACTTAGTCTTAATTGCAACGAGGATTGTGGGACTTCTGGGACGCAGGGGGTGGGAAACCCTCAAATATCTGTGGAATCTCCTACAGTATTGGATCCAGGAACTAAAGAATAGTGCTATTAGCTTGCTTGATACTACAGCAATAGCAGTAGCTGAGGGGACAGATAGGGTTATAGAAATAGTACAAAGAGTTATTAGAGCTGTTCTCAACGTACCCACACGAATAAGACAGGGCTTAGAAAGAGCTTTACTATAAAATGGGTGGCAAATGGTCAAAAAGTAGTCTAGTTGGATGGCCTGCTGTAAGGGAAAGAATGAGAAGAACTGTTCCAGCAGCAGCAGGGGTGGGAGCAGTATCTCGGGATCTGGAAAAGCATGGGGCAGTCACAAGTAGCAATACAGCACATACCAATCCTGACTGTGCCTGGCTAGAAGCACAAGAAGAAGAGGAAGTGGGTTTTCCAGTCAAACCTCAAGTACCATTAAGACCAATGACTTACAAGGGAGCTGTAGATCTGAGCCACTTTTTAAAAGAAAAGGGGGGACTGGAAGGGTTAATTTGGTCCCAGAACAGACAAGATATCCTTGATCTTTGGGTCTACCACACACAAGGCTACTTCCCTGATTGGCAAAACTACACACCAGGGCCAGGGGTTAGATATCCACTGACCTTCGGATGGTGCTTCGAGCTAGTACCAGTGGATCCAAAAGAGGTAGAAGAGGGCACTGCAGGAGAGAACAGCTGCTTGTTACACCCTATGTGCCAGCATGGAGCGGAGGACTTGGAGAAAGAAGTGTTAAAGTGGAGATTTAACAGTAGACTGGCATTTGAACATAAAGCCAAAATGCTACATCCGGAGTACTTCAAAGACTGCTGACACCGAGTTTTCTACAAGGGACTTTCCGCTGGGGACTTTCCAGGGAGGAGTCAGGGGCGGGACTGGGAGTGGCTAACCCTCAGATGCTGCATATAAGCAGCTGCTTTTCGCCTGTACTGGGTCTCTCTTGTTAGACCAGATTTGAGCCTGAGAGCTCTCTGGCTAGCTAGGGAACCCACTGCT
>D.KE.97.ML415_2_AY322189_H.BE.93.VI991_AF190127
GCTTGCCTTGAGTGCTTCAAGTAGTGTGTGCCCGTCTGTTGTGTGACTCTGGTAACTAGAGATCCCTCAGACCTCTGTAGTCAGTGTGAAAATCTCTAGCAGTGGCGCCCGAACAGGGACTTGAAAGCGAAAGTAGAACCAGAGGAGCTCTCTCGACGCAGGACTCGGCTTGCTGAAGCGCGCACAGCAAGAGGCGAGGGCAGCGAACGGTGAGTACGCTGAAATTTTTGACTAGCGGAGGCTAGAAGGAGAGAGATGGGTGCGAGAGCGTCAGTATTAAGCGGGGGAAAATTAGATGAATGGGAAAAAATTCGGTTAAGCCCAGGGGGAAGCAAAAAATATAGACTAAAACATTTAGTATGGGCAAGCAGGGGGCTTGAACGATTTGCACTTAATCCTGGCCTTTTAGAAACATCAGAAGGGTGTAAACAAATAATGGGACAGCTTCAACCAACTATTCAGACAGGATCAGAGGAAATTAAATCATTATATAATACAGTAGCAACCCTTTATTGTGTACATCAAAGGATAAAGGTAGCAGACACCAAGGAAGCTTTAGACAAGATAGAGGAAGAACAAACCAAAAGTAAGAAAAAGGCACAGCAAGCAACAGCTGACACAAGAAACAGCAGTCAGGTCAGCCAAAATTACCCTATAGTGCAAAACTTACAGGGGCAAATGGTACACCAGCCCATATCACCTAGAACTTTGAACGCATGGGTAAAAGTAATAGAGGAAAAGGCTTTCAGCCCAGAAGTAATACCCATGTTTTCAGCATTATCAGAAGGAGCCACCCCCCAAGATTTGAACGTCATGCTAAACACAGTGGGGGGACATCAAGCAGCCATGCAAATGTTTAAAGAAACCATCAATGAGGAAGCTGCAGAATGGGATAGGCTACATCCAGTGCATGCAGGGCCTCCTGCACCAGGCCAACTGAGAGAACCAAGGGGAAGTGATATAGCAGGAACTACTAGTACCCTTCAGGAACAAATAGGATGGATGACAAGCAATCCACCTATCCCGGTAGGAGACATCTATAAAAGATGGATAATCCTAGGATTAAATAAAATAGTAAGAATGTATAGCCCTGTCAGCATTTTGGACATAAAACAAGGACCAAAGGAACCCTTTAGAGACTATGTAGATCGGTTCTATAAAGTTTTAAGAGCCGAGCAAGCTTCACAGGATGTAAAAAATTGGATGACTGAAACCTTGTTGGTCCAAAATGCGAACCCAGATTGTAAAACTATCTTAAAAGCTTTGGGACCAGCGGCTACATTAGAAGAAATGATGACAGCATGCCAGGGAGTAGGGGGACCCAGTCATAAGGCAAGAGTTTTGGCTGAGGCAATGAGCCAAGCAACAAATGCAAATGTTGCTATAATGATGCAGAGAGGCAATTTTAAGGGCCCAAAGAGAATCATTAAGTGTTTCAACTGTGGCAAAGAAGGGCACATAGCAAAAAATTGCAGGGCTCCTAGGAAAAGAGGTTGTTGGAAATGTGGACAGGAAGGACACCAAATGAAAGATTGCACTGAAAGACAGGCTAATTTTTTAGGGAAAATCTGGCCTTCCAACAAAGGAAGGCCAGGGAACTTCCCTCAGAGCAGACTAGAACCAACAGCCCCACCAGCAGAGAGCTTTGGGTTCGGGGAGGAGATGACACCCCCTCAGAGACAGGAGCAGAGGGACAAGGAACTGTGTCCTTTAGCTTCCCTCAAATCACTCTTTGGCAACGACCCCTCGTCACAGTAAAGATAGGGGGACAGCTAAAGGAAGCTCTATTAGACACAGGAGCAGATGATACAGTATTAGAAGAAATGAATTTGCCAGGAAAATGGAAACCAAAAATGATAGGGGGAATTGGAGGATTCATCAAAGTAAGACAATATGATCAAATACTAGTAGAAATCTGTGGACATAAGGCTATTGGTACAGTATTAATAGGACCTACACCTGTCAACATAATTGGAAGAAATTTGTTGACTCAGATTGGCTGCACTTTAAATTTTCCAATTAGTCCTATTGAAACAGTACCAGTAAAATTAAAGCCAGGGATGGATGGCCCAAAAGTTAAACAATGGCCATTGACAGAAGAAAAAATAAAAGCACTAACAGAAATTTGTACAGAAATGGAAAAGGAAGGAAAAATTTCAAGAATTGGGCCTGAAAATCCATACAATACTCCAATATTTGCCATAAAGAAAAAAGACAGTACTAAGTGGAGAAAGTTAGTAGATTTCAGAGAACTTAATAAGAGAACTCAAGACTTCTGGGAGGTTCAACTAGGAATACCACATCCTGCAGGGCTAAAAAAGAAAAAATCAGTAACAGTACTGGATGTGGGTGATGCATACTTTTCAGTTCCCTTACATGAAGACTTTAGAAAATATACTGCATTCACCATACCTAGTATAAACAATGAGACACCAGGAATTAGATATCAGTACAATGTGCTTCCACAAGGGTGGAAAGGATCACCAGCAATATTCCAAAGTAGCATGACAAAAATCTTAGAACCTTTTAGAAAACGAAATCCAGAAATGGTTATCTACCAATACATGGATGATTTGTATGTAGGATCTGACTTGGAAATAGGGCAGCATAGAAGCAAGATAGAGGAATTAAGGGAACACCTATTGAAGTGGGGATTTACCACACCAGACAAAAAGCATCAGAAAGAACCTCCATTTCTTTGGATGGGTTATGAACTCCATCCTGATAAATGGACAGTACAGCCTATACAGCTGCCAGAAAAAGAAAGCTGGACTGTCAATGATATACAGAAGTTAGTGGGAAAATTAAATTGGGCAAGCCAGATCTATCCAGGAATTAAAGTAAGACAATTATGCAAATGTCTTAGGGGAACCAAAGCATTGACAGATGTAGTACCATTAACAGAAGAAGCAGAATTAGAACTGGCAGAAAACAGGGAAATTCTAAAAGAACCAGTACATGGAGTATATTATGACCCATCAAAAGACTTAATAGCAGAAATACAGAAGCAAGGGCAAGACCAGTGGACATATCAAATTTATCAAGAACAATATAAAAATCTGAAAACAGGAAAATATGCAAAAATGAGGGGTGCCCACACCAATGATGTAAGACAATTAACAGAGGCAGTGCAAAAAATAGCCCAAGAATGTATAGTGATATGGGGAAAGACTCCTAAATTTAGACTACCCATACAAAAGGAAACATGGGAGACATGGTGGACAGAGTATTGGCAGGCCACCTGGATTCCTGAGTGGGAGTTTGTCAATACCCCTCCTTTAGTTAAATTATGGTCCCAGTTAGAAAAGGAACCCATAGCAGGAGCAGAAACTTTCTATGTAGATGGAGCAGCTAATAAAGAAACTAAGTTAGGAAAAGCAGGATATGTTACTGACAAAGGAAGACAGAAAGTTGTCTCTATAACTGATACAACAAATCAGAAGACTGAATTACAAGCCATTAATCTAGTTTTACAGGATTCAGGATTAGAAGTAAACATAATAACAGACTCACAATATGCATTAGGAATCATTCAAGCACAACCAGATAAGAGTGAATCAGAGTTAGTCAATCAAATAATAGAGCAGTTAATAAGGAAGGAAAAGGTCTACCTATCATGGGTACCAGCACACAAAGGGATTGGAGGAAATGAACAAGTAGATAAATTAGTCAGTAATGGGATCAGGAAAGTACTATTCTTGGATGGGATAGATAAGGCTCAAGAAGAACATGAGAAATACCACAACAATTGGAGAGCAATGGCTAGTGATTTTAACCTGCCACCTGTGGTAGCAAAAGAAATAGTAGCTAGCTGTGATAAATGTCAACTAAAAGGAGAAGCCATGCATGGACAAGTAGACTGTAGTCCAGGAATATGGCAATTAGATTGTACACACTTAGAAGGAAAAGTTATCCTGGTAGCAGTCCATGTAGCCAGTGGCTATATGGAAGCAGAAGTTATTCCAGCAGAAACAGGACAGGAAACAGCCTACTTTATCTTGAAGTTAGCAGGAAGATGGCCAGTAAAAATAGTACATACAGACAATGGCAGCAATTTCACCAGCGCTGCAGTTAAGGCCGCATGTTGGTGGGCAGGTGTTAAGCAGGAATTTGGAATTCCCTACAATCCCCAAAGTCAAGGAGTAGTAGAATCTACGAATAAAGAGTTAAAGAAAATTATAGGACAGGTAAGAGATCAAGCTGAACATCTTAAGACAGCAGTACAAATGGCAGTATTTATCCACAATTTTAAAAGAAAAGGGGGGATTGGGGGGTACAGTGCAGGGGAAAGAATAATAGACATAATAGCATCAGACATACAAACTAAAGAATTACAGAAACAAATCATAAAAATTCAAAATTTTCGGGTTTATTACAGGGACAGCAGAGATCCAATTTGGAAAGGACCAGCAAAGCTTCTCTGGAAAGGTGAAGGGGCAGTAGTACTACAAGACAATAGTGAAATAAAGGTAGTACCAAGAAGAAAAGCAAAGATCATTAGGGATTATGGAAAACAGATGGCAGGTGATGATTGTGTGGCAAGTAGACAGGATGAGGATTAGAACATGGAAGAGTTTAGTAAAACATCATATGCATATTTCAAAGCAAGCTCGAGGATGGTTGTATAGACATCACTTTGAAAGCAGGCATCCAAAAATAAGTTCAGAAGTACACATCCCACTAGGAGAAGCTAGACTGGTAGTAAAAACATATTGGGGTCTGCATACAGGAGAAAGAGATTGGCATCTGGGTCAGGGAGTCTCCATAGAATGGAGGAAAGGGAGATATAGCACACAAGTAGACCCTGGCCTAGCAGACCAACTAATTCATATACATTATTTTGATTGTTTTGCAGAATCTGCTATAAGAAAAGCCATATTAGGACAAATAGTTATTCCTAGGTGTAATTACCCAGCAGGACATACCCAGGTAGGATCTTTACAATATTTGGCATTAACTGCATTAATAACACCAAAAAAGATAAAACCACCTTTGCCTAGTGTTAGGAAGCTGACAGAAGACAGATGGAACAAGCCCCAGAGGACCAAGGGCCACAGAGGGAGCCATACAATGAATGGACATTAGAGCTTTTAGAGGAGCTTAAGAGTGAAGCTGTTAGACACTTTCCTAGGGTTTGGCTTCATGGCCTAGGACAACATATCTATGAGACTTATGGGGATACCTGGACAGGAGTTGAAGCTATAATAAGAATCCTTCAACAATTACTATTTATCCATTTCAGAATTGGGTGTCGCCATAGCAGGATAGGCATTAATCGACAGAGAAGAACAAGAAATGGAGCCAGTAGATCATAACCTAGAGCCCTGGAACCATCCAGGAAGTCAGCCTAGTACTCCTCGTAACAAGTGTTATTGTAAAAAGTGTTGCTATCATTGCCAAGTTTGCTTCATAACGAAAGGCTTAGGCATCTCCTATGGCAGGAAGAAGTGGAGACAGAGACGAAGATCTTCTCAAGGCGGTCAGGCTCATCAAGATCCTATACCAAAGCAGTAAGTAGGTACAAGTAATGAATGCTCTAGAGATATCAGCAATAGTAGCATTAGTAGTAACGCTAATAATAGCAATAGTTGTGTGGACTATAGTAATCATAGAGTGGATAAGATTAAAAAAGCAAAGAAAAATAGACAGGTTAATTGAGAGAATAAGAGAAAGAGCAGAAGACAGTGGCAATGAAAGTGAGGGGGACACAGATGAATTGGCAAAACTTGTGGAGATGGGGAACTATGATCCTGGGGATGATAATAATTTGTAGTGCTGCAGAAAACTTGTGGGTTACTGTCTACTATGGGGTACCTGTGTGGAAAGAAGCAACCACTACTCTATTTTGTGCATCAGATGCTAAATCATATGAAGCAGAGGCACATAACATCTGGGCTACACATGCCTGTGTACCAACAGACCCCAACCCACAAGAAATAGTACTAGAAAATGTCACAGAAAACTTTAACATGTGGAAAAATAACATGGTGGAGCAGATGCATGAGGATATAATCAGTTTATGGGATCAAAGCTTAAAACCATGTGTAAAATTAACCCCGCTCTGTGTCACTTTAAACTGCACTGATGCGAATGCCACTAATGTCACTACTACAGATGCTGCTGCTGATGTTACCGATAGTGACATTGGCACGAAGACCAGCTGTTCTACTGATGCCGCCACAGAAGGGAATAAGAGGGAGCCAGGAGTTGCACCTCTTTCTGATCTTGTTGCGGCGCCACTGGTTAATGGTAATAATAATACTGCTGCCTTTTGTTTAATAAATGGTGGTGCCCCAACCGTTACACAAGATTGTCCAAAGGGGACAATTGAGCCAATTCCTATACATTATTGTGCCCCAGCTGGATTGGCAATTCTAAAATGTAACGACAAGAATTTTAGTGGGGGGGGTGGATGCTGCAACATCAGCACAATACATCGTACACATGGTGGGAGGGCACCAGTCCCAACTAAACTGTTGTTGAATGGCAGTCTAGCAGAAGAAGACATAGTAATTAGATCTGAGAATATCACAAATAATGCTAAAATTATAATAGTACAGCTTAAGCAGTCTGTACCAATTACTTGCACAAGGCCCAACAACAATACAAGAAAAAGTGTACATATAGGACCAGGACGAGCACTCTATACAATAGAATTAGTAGGAGATATAAGACAAGCACATTGTGCCATCAATGGAACAAGATGGAATGACACTTTACAGCAGGTAGCTACAAAATTAGGAGCCTTTTTAACAAAGAAAGAAATAATTTTTAAACCATCCTCGGGAGGGGACCCAGAAATTACAACACATAGCTTTAATTGTGGAGGGGAATTTTTCTACTGCAACACATCAAACCTGTTTAATAGCATTTGGAATGTTACTAATGGTACTAGCCAGCTGGAGTCAAATAGCACAGAGTTAGCCGGAAATATAACTCTCCCATGCAGAATAAAGCAAATTATAAACATGTGGCAGGGAGTAGGAATAGCAATGTATGCCCCTCCCATCAGAGGAAACATCACATGTATATCAAATATTACAGGACTAATATTGACATTTGACCGGAATAATACAAATAATGTTACCTTCAGACCTGGAGGAGGAGATATGAGGGACAATTGGAGAAGTGAATTATATAAATATAAAGTAGTAAAAATTGAACCACTGGGAGTAGCACCAACCGAGGCAAGGAGAAGAGTGGTGGAAAGAGAAAAAAGAGCAATAGGACTGGGAGCTATGTTCCTTGGGTTCTTGGGAGCAGCAGGAAGCACGATGGGCGCAGCGTCAGTGACGCTGACGGTACAGGCCAGACAGTTACTGTCTGGTATAGTGCAACAGCAAAACAATTTGCTGAGAGCTATAGAGGCGCAACAGCATCTGTTGCAACTCACAGTCTGGGGCATTAAACAGCTCCAGGCAAGAGTCCTGGCTGTGGAAAGCTACCTAAAGGATCAACAGCTCCTAGGACTGTGGGGTTGCTCTGGAAAACTCATTTGCACCACTACTGTGCCTTGGAACTCTAGCTGGAGTAATAAATCTCAAGAGGAGATTTGGAATAACATGACCTGGATGCAGTGGGAAAGAGAAATTGACAATTACACAGATTTAATATACACCTTAATTGAAAAATCGCAAAACCAGCAAGAACAGAATGAACACGAACTTTTGAAATTGGACAAATGGGCAAGTTTGTGGAATTGGTTTAGCATAACACAATGGCTGTGGTATATAAAAATATTCATAATGATAGTAGGAGGCTTGATAGGTTTAAGAATAGTTTTTGCTGTGCTTTCCTTAGTAAATAGAGTTAGGCAGGGATATTCACCTCTGTCGTTTCAGACCCTCCTCCCAGTCCCGAGGGAACCCGACAGGCCCGAAGGAATAGAAGAAGAAGGTGGAGAGCAAGGCAGAAGCAGATCGATTCGCTTGGTGCACGGATTCTCAGCACTTATCTGGGACGATCTGAGGAACCTGTGCCTCTTCAGCTACCACCGCTTGAGAGACTTTCTCTTGATTGCAACGAGGATTGTGGAACTCCTGGGACGCAGGGGGTGGGAAGCCCTCAAATATCTGTGGAACCTCCTGCAGTATTGGATTCAGGAACTAAAAAATAGTGCTATTAGCTTGCTTAATACCACAGCAATAGTAGTAGCTGAGGGGACAGATAGGGCTATAGAAATAATACAAAGAGCTTTTAGAGCTTTTCTTAACATACCCACACGAATAAGACAGGGCTTGGAAAGGGCTTTGCTATAACATGGGTGGCAAATGGTCAAAAAGTAGTATAGTTGGATGGCCTGCTATAAGGGATAGAATAAGAAGAACTGCTCCAGCAGCAGAAGGGGAGAGAGCAGCAGCAGAAGGGGTGGGAGCAGCATCTCGGGACCTGGAAAAACATGGGGCAATCACAAGTAGCAATGCAGCGCAGACCAATCCTGACTGTGCCTGGCTGGAAGCACAGGAAGAGGAAGAGGAAGTGGGTTTTCCAGTCAGACCTCAGGTACCGTTAAGACCAATGACTTACAAGGCAGCTTTTGATCTAAGCTTCTTTTTAAAAGAAAAGGGGGGACTGGAAGGGTTAATTTGGTCCCAGAAAAGACAAGAGATCCTTGATCTTTGGGTCTATAACACACAAGGCTTCTTCCCTGATTGGCAAAACTACACACCAGGGCCAGGGATTAGATATCCACTGACCTTTGGATGGTGCTTCGAGCTAGTACCAGTTGAGCCAAAGGAGGTAGAAGAGGCCACTGAAGGAGAGAACAACTGCTTGTTACACCCTATGTGCCAGCATGGAATGGAGGACCCAGAGAGAGAAGTGTTAATGTGGAGATTTAACAGTAAATTGGCATATGAACACAAGGCCAAGATGCTGCATCCGGAGTTCTACAAAGACTGCTGACACTGATGTACACACTGTGGACACTGATGTTACTACAAGGGACTTTACGCTGGGGACTTTGCAGACTAGGTGTGGTTTGGGCGGAGTTGGGGAGTGGCTAACCCTCAGATGCTGCATATAAGCAGCTGCTTTTCGCCTGTACTGGGTCTCTCTTGTTAGACCAGATTGAGCCTG
>D.UG.99.99UGE23438_AF484489_J.SE.94.SE7022_AF082395
GCGAGAGCGTCAGTATTAAGCGGGGGAAAATTAGATGAATGGGAAAAAATTCGGTTACGGCCAGGGGGAAAGAAAAAATATAGACTAAAACATATAGTATGGGCAAGCAGGGAGCTAGAACGATATGCACTTAATCCTGGCCTTTTAGAAACATCAGAAGGCTGTAGACAAATAATAGGACAGCTACAACCAGCTATTCAGACAGGATCAGAGGCACTTAAATCATTATATAACACAGTAGCAACCCTCTATTGTGTACATGAAAAGATAAAGGTAACAGACACCAAGGAAGCTTTAGACAAGATAGAGGAAGAACAAACCAAAAGTAAGAAAAAGGCACAGCAAGTAACAGCTGACACAAGAAGCAACAACCAGGTCAGCCAAAATTATCCTATAGTACAAAACCTACAGGGGCAAATGGTACACCAGCCCTTATCACCTAGAACTTTGAATGCATGGGTAAAAGTAATAGAGGAGAAGGCTTTCAGCCCAGAAGTAATACCCATGTTTTCAGCGTTATCAGAAGGAGCCACCCCACAAGATTTAAACACCATGCTAAACACAGTGGGGGGACATCAAGCCGCCATGCAAATGTTAAAGGAGACCATCAATGAGGAAGCTGCAGAATGGGATAGGCTACATCCAGTGCATGCAGGGCCTATTGCACCAGGCCAAATGAGAGAACCAAGGGGAAGTGATATAGCAGGAACTACTAGTACCCTTCAGGAGCAGATAGCATGGATGACAAACAATCCACCTATCCCAGTGGGAGAAATCTATAAAAGATGGATAATCCTAGGATTAAATAAAATAGTAAGAATGTATAGCCCTGTTAGCATTTTGGACATAAGACAAGGACCAAAGGAACCCTTTAGAGACTATGTAGATCGGTTCTATAAAACTCTAAGAGCCGAGCAAGCTTCACAGGATGTAAAAAATTGGATGACCGAAACCTTGTTGGTCCAAAATGCGAACCCAGATTGTAAAACTATTTTAAAGGCATTGGGACCAGCGGCTACATTAGAAGAAATGATGACAGCATGTCAGGGAGTAGGGGGACCCAGTCATAAAGCAAGAGTTTTGGCTGAAGCAATGAGCCAAGCATCAAATGCAAACGTTGCTATAATGATGCAGAGGGGCAATTTTAAGGGCCCAAGGAAAAACATTAAGTGTTTCAATTGTGGCAAAGAAGGACACATAGCAAAAAATTGCAGGGCTCCTAGAAAAAGGGGCTGTTGGAAATGTGGAAAGGAAGGACACCAAATGAAAGATTGCACTGAAAGACAGGCTAATTTTTTAGGGAAAATTTGGCCTTCCCACAAGGGAAGGCCAGGGAATTTCCTTCAGAGCAGACCAGAACCAACAGCCCCACCAGCAGAGAGCTTCGGGTTTGGGGAGGAGATAGCATCCTCCCAGAAACAGGAGCAGAAAGACAAGGAGCTGTATCCTTTGGCTTCCCTCAAATCACTCTTTGGCAACGACCCCTAGTCACAATAAAAATAGGGGGACAGCTAAAGGAAGCTCTATTAGATACAGGAGCAGATGATACAGTATTAGAGGAAATAAATTTGCCAGGAAAATGGAAACCAAAAATGATAGGGGGAATTGGAGGCTTTATCAAAGTAAGACAGTATGATCAAATACACATAGAAATCTGTGGACATAAAGCTATAGGTACAGTATTAGTAGGACCTACACCTGTCAACATAATTGGAAGAAACTTGTTGACTCAGATTGGTTGTACTTTAAATTTTCCAATTAGTCCTATTGAAACTGTACCAGTAAAATTAAAGCCAGGGATGGATGGCCCAAAAGTTAAACAATGGCCGCTGACAGAAGAAAAAATAAAAGCACTAACAGAAATTTGTACAGAAATGGAAAAGGAGGGAAAAATTTCAAGAATTGGGCCTGAAAATCCATACAATACTCCAATATTTGCCATAAAGAAAAAAGACAATACTAAGTGGAGAAAATTAGTAGATTTCAGAGAACTTAATAAGAGAACTCAAGACTTCTGGGAAGTTCAACTAGGAATACCACATCCCGCAGGGTTAAAAAAGAAAAAATCAGTAACAGTACTGGATGTGGGTGATGCATATTTTTCAGTTCCCTTATATGAAGACTTCAAAAAATATACTGCATTTACCATACCTAGTATAAACAATGAGACACCAGGAATTAGATATCAGTACAATGTGCTTCCACAAGGATGGAAAGGATCACCGGCAATATTCCAAAGTAGCATGACAAAAATCTTAGAACCTTTTAGAAAACAAAATCCAGAAATGGTTATCTATCAATACATGGATGATTTGTATGTAGGATCTGACTTAGAAATAGGGGAGCATAGAATAAAAATAGAGGAATTAAGGGGACACCTATTGAAGTGGGGATTTACCACACCAGACAAAAAGCATCAGAAAGAACCTCCATTTCTTTGGATGGGTTATGAACTTCATCCTGACAAATGGACAATACAGCCTATAGAACTGCCAGAACAGGAAAGCTGGACTGTCAATGATATACAGAAGTTAGTGGGGAAATTGAATTGGGCAAGCCAGATTTATTCAGGGATTAAGGTAAGACAATTATGCAAATGCCTTAGGGGAGCCAAAGCACTGACAGAAGTAGTACCACTGACAAAAGAAGCAGAATTAGAACTGGCAGAAAACAGGGAAATTCTAAAAGAACCAGTACATGGAGTGTATTATGACCCATCAAAAGACTTAATAGCAGAAATACAGAAACAAGGGCAAGACCAATGGACATATCAAATTTATCAAGAGCAATATAAAAATCTGAAAACAGGAAAGTATGCAAAAATGAGAGGTACCCACACTAATGATGTAAGACAATTAACAGAGGCAGTGCAAAAAATAGCCCAAGAATGTATAGTGATATGGGGAAAGACTCCTAAATTTAGACTACCCATACAAAAGGAAACATGGGAAACATGGTGGACAGAGTATTGGCAAGCCACCTGGATTCCTGAGTGGGAGTATGTCAATACCCCTCCTTTAGTTAAATTATGGTACCAGTTAGAAAAGGAACCCATAGTAGGAGCAGAAACATTCTATGTAGATGGGGCAGCCAATAGAGAAACTAAATTAGGAAAAGCAGGATATGTTACTGACAGAGGAAGACAGAAAGTTGTCTCTCTATCGGACACAACAAATCAGAAGACTGAATTACAAGCCATTTATTTAGCTTTACAGGATTCAGGGATAGAAGTAAACATAGTAACAGATTCACAATATGCATTGGGGATTATTCAAGCACAACCAGATAAGAGTGAATCAGAATTAGTCAATCAAATAATAGAGGAGTTAATAAAGAAGGAAAAGGTCTACCTGTCGTGGGTACCAGCACACAAAGGAATTGGAGGAAATGAACAAGTAGATAAATTAGTCAGTAATGGAATTAGAAGAGTACTATTTTTGGATGGAATAGATAAGGCTCAAGAAGAACATGAGAAATACCACAACAATTGGAGAGCAATGGCTAGTGATTTTAACCTGCCACCTGTGGTAGCAAAAGAAATAGTAGCTAGTTGTGATAAATGTCAGATAAAAGGAGAAGCCTTGCATGGACAAGTAGACTGTAGTCCAGGAATATGGCAATTAGATTGTACACATTTAGAAGGAAAAGTCATCCTGGTAGCAGTCCATGTAGCCAGTGGCTATATAGAAGCAGAAGTTATTCCAGCAGAAACAGGGCAGGAAACAGCCTACTTTCTCTTGAAATTAGCAGCAAGATGGCCAGTAAAAGTAGTACATACAGACAATGGCAGCAATTTCATCAGCGCTGCAGTTAAGGCCGCCTGTTGGTGGGCAGGCATCAAGCAGGAATTTGGAATTCCCTACAATCCCCAAAGTCAAGGAGTAGTAGAATCTATGAATAAAGAATTAAAGAAAATTATTGGACAGGTAAGAGAGCAAGCTGAACATCTTAGGACAGCAGTACAAATGGCAGTATTCATTCACAATTTTAAAAGAAAAGGGGGGATTGGGGAGTACAGTGCAGGGGAAAGAATAATAGACATAATAGCAACAGACATACAAACTAAAGAATTACAAAAACAAATTATAAAAATTCAAAATTTTCGGGTTTATTACAGGGACAGCAGAGATCCAATTTGGAAAGGACCAGCAAAGCTTCTTTGGAAAGGTGAAGGGGCAGTAGTAATACAAGATAATAGTGAAATAAAGGTAGTACCAAGAAGAAAAGCAAAAATCATTAGGGATTATGGAAAACAGATGGCAGGTGATGATTGTGTGGCAAGTAGACAGGATGAGGATTAGAACATGGAAGAGTTTAGTAAAACATCATATGTATGTTTCAAAGAAAGCTCATGGATGGTTGTACAGACATCACTATGACTGCCCAAACCCAAAAATAAGTTCAGAAGTACACATCCCACTAGGAGAAGCCAGACTGGTAATAAAAACATATTGGGGTCTGCATACAGGAGAAAGAGAATGGCATCTGGGTCAGGGAGTCTCCATAGAATGGAGGAAAAGGAGATATAGCACACAAGTAGACCCTGGCCTGGCAGACCAACTAATTCATATATATTATTTTGATTGTTTTACAGAATCTGCTATAAGGAAAGCCATATTAGGACATATAGTTACTCCTAGGTGTAATTATCAAGCAGGACATAACAAGGTAGGATCTTTACAATATTTGGCACTAACAGCATTAATAACACCAAAAAAGATAAAGCCACCTTTGCCTAGTGTTAGGAAGCTGACAGAAGATAGATGGAACAAGCCCCAGAGGACCAAGGGCCACAGAGGGAACCATACAATGAATGGACATTGGAGCTTTTAGAGGAGCTTAAACATGAAGCTGTTAGGCACTTTCCTAGGCCATGGCTTCATAGCATAGGACAATACATCTATGAAACTTATGGAGATACCTGGACAGGAGTTGAAGCTATAATAAGAGTCCTTCAACAACTACTGTTTATCCATTTCAGAATTGGGTGTCACCATAGCAGAATAGGCATTGCTCGACAGAGAAGAACAAGAAATGGAGCCAGTAGATCCTAACTTAGATCCCTGGAACCATCCAGGAAGTCAGCCTAGTACTCCTTGTAACAAGTGTTATTGTAAAAAGTGCTGCTATCATTGTCCAGTTTGCTTCGTAACGAAAGGCTTAGGCATCTCCTATGGCAGGAAGAAGCGGAGACAGCGACGAAGACCTCCTCAAGGCGGTCAGGCTCATCAAGATCCTATACCAAAGCAGTAAGTAGTACATGTAATGCAACCTTTAGAGATATCAGCAATAGTAGCATTAGTAGTAGCGCTAATACTAGCAATAATTGTGTGGACTATAGTATTCATAGAGTGTAGAAGAGTAAAAAGGCAAAGAAAAATAGACTGGTTAATTGATAGAATAAGAGAAAGAGAAGAAGACAGTGGCAATGAGAGTGAGGGAGATAGAGAGGAATTATCAGCACTTGCGGAGATGGGGCACCATGCTCCTTGGAATGTTGATGATATGTAGTGTTACAGGAAAGTTGTGGGTCACAGTTTATTATGGGGTACCTGTGTGGAAAGAGGCAACCACTACTCTATTTTGTGCATCAGATGCTAAAGCATATGAAGCAGAGGCACATAATGTCTGGGCTACACATGCCTGTGTACCAACAGACCCCAACCCACGAGAAATAAAACTAGAAAATGTCACAGAAAACTTTAACATGTGGAAAAATCACATGGTGGAGCAAATGCATGAGGATATAATCAGTTTATGGGATCAAAGCCTAAAACCATGTGTAAAATTAACCCCACTCTGTGTCACTTTAAACTGCACTGAATGGAAGAATGCAACTGCAACTGCCCTTAATAGAACTGAGGAAATAGGAATGAAAAACTGCTCTTTCAATATAACCACAGAAGTTAGAGATAGGAAGAAGCAAGTATATGCACTTTTTTATAAACTTGATGTGGTACAATTAGATGGTGATAATAGTACTAATACCAACTATACCAGCTATAGGTTAATAAACTGTAATACCTCAGCCATTACACAAGCGTGTCCAAAGGTATCCTTTGAGCCAATTCCCATACATTATTGTGCCCCAGCTGGATTTGCAATTCTAAAATGTAATAATGAGACGTTCAATGGGACGGGTCCATGCACAAACGTCAGCACAGTACAATGTACACATGGGATTAAGCCAGTAGTGTCAACTCAACTGTTGTTGAATGGCAGCCTAGCAGAGAAAGAAGTAATAATTAGATCTGAAAATATCACAGATAATGCTAAAATCATAATAGTACAGCTTAATGAGTCTGTATCAATTAATTGCACAAGGCCCTACAAAACTATGAGACAAAGTACACCTATAGGAATAGGGCAAGTATACTACACAAAACAAATAGTAGGAAATATAAAACAAGCATATTGTAACATTAGTAAAACAAGATGGCATAACACTTTATACTATGTAACTAACAAATTAAAAACCCTTCTTAACAACAGTGAAATAACATTTAAGCCATCCTCGGGAGGGGACCCAGAAATTACAACACACAGTTTTAATTGTGGAGGGGAATTTTTCTACTGCAATACATCAAGACTGTTTAATGGTACTTATGATACTTATGATACATCGAATGGTACAGGGAGTGAAAATATCACACTCCAATGCAGAATAAAACAAATGATAAACATGTGGCAAGGAGTAGGCAAAGCAATGTATGCCCCTCCCATTGAAGGAACAATCAACTGTTTATCAAATATTACAGGACTATTGTTGACAAGAGATGGTGGTGTAAAAAATAGTACTAATGAGACCTTCAGACCTGGAGGAGGAGATATGAGAGACAATTGGAGAAGTGAATTATATAAGTATAAAGTAGTAAGACTTGAACCACTAGGCCTAGCGCCCACAGAGGCAAGAAGAAGAGTGGTGGAAAGAGAAAAAAGAGCAATAGGCCTACTAGGAGCTATGTTCCTTGGGTTCTTGGGAGCAGCAGGAAGCACGATGGGCGCAGCGTCACTGACGCTGACGGTACAGGCCAGACAGTTAATGTCTGGTATAGTGCAACAGCAAAACAATCTGCTGAGGGCTATAGAGGCGCAACAGCATATGTTGCAACTCACAGTCTGGGGCATTAAACAGCTCCAGGCAAGAATCCTGGCTGTGGAAAGTTACCTAAAGGATCAACAGCTCCTAGGAATTTGGGGTTGCTCTGGAAAACTCATTTGCACCACTAATGTGCCCTGGAACTCTAGCTGGAGTAATAAATCTCTAGATGAGATTTGGAATAACATGACCTGGATAGAGTGGGAAAGAGAAATTGACAATTACACAGGATTAATATACAACTTAATTGAAGAATCGCAAGCCCAGCAAGAAAAAAATGAACAAGAACTATTGCAATTGGACAAATGGGCAAGTTTATGGAATTGGTTTAGCATAACACAATGGCTGTGGTATATAAAAATATTCATAATAATAGTAGGAGGCTTGATAGGTTTAAGAATAGTTTTTGCTGTGCTTTCTGTAGTAAATAGAGTTAGGCAGGGATACTCACCTCTATCGTTTCAGACCCTCCTCCCAGCCCCGAGGGGACCCGACAGGCCCGAAGGAATAGGAGAAGCAGGTGGAGAGCAAGGCAGAGGCAAATCCATTCGATTGGTGAACGGATTCTCAGCACTTATCTGGGACGACTTGAGGAACCTGTGCCTCTTCAGCTACCACCGCTTGAGAGACTTACTCTTAATTGCAGCGAGGATTGTGGAACTTCTGGGACGCAGGGGGTGGGAAGCCATCAAATATCTGGGGAATCTCCTGCAGTATTGGATTCAGGAACTAAAGAATAGTGCTATTAGCTTGCTTAATATCACAGCAATAGCAGTAGCTGAGGGGACAGATAGGGTTATAGAAGTAGCACAAAGAGCTGTTAGAGCTGTTCGTAACGTACCCAGACGAATAAGACAAGGCGCGGAAAGGGCTTTACTATAAAATGGGTGGCAAATGGTCAAAAAGTAGTATAGTTGGATGGCCTGCTATAAGAGAAAGAATGAGAAGAACTAGTCCAGCAGCAGAAGGGGTGGGAGCTGTATCTCGGGACCTGGAAAAACATGGGGCAATTACAAGTAGTAATACAGCACAGACTAATCCTGACTGTGCCCGGTTAGAAGCACAAGAAGAGGACGGAGGAGTGGGTTTTCCAGTCAGACCTCAGGTACCATTAAGACCAATGACTTACAAGGGAGCTCTCGATCTGAGCCACTATTTAAAAGAAAAGGGGGGACTGGATGGGTTAATTTGGTCCCAGAAAAGGCAAGAAATCCTTGATCTTTGGGTCTATCACACACAAGGCTACTTCCCTGATTGGCAAAACTACACACCAGGGCCAGGGATTAGATTTCCACTAACCTTTGGATGGTGCTTCGAGCTAGTACCAGTTGATCCAAAGGAGGTAGAAGAGGACACTGAAGGAGAGAACAACTGCTTGTTACACCCTATGTGCCAGCATGGAATGGAGGACCTGGAGAGAGAAGCGCTAATGTGGAGATTTAACAGTAGGCTGGCATTTGAACACAAGGCCCGAGAGAAGCATCCGGAGTACTACAAAGACTGCTGACACCGAGTTAAAGACTGCTGACACCGAGTTTCTACAAGGGACTTTCCGCTGGGGACTTTCCGGGGAGGCGTAACAGGGGCGGGACTGGGAGTGGCTAACCCTCAGATGCTGCATATAAGCAGCTGCCTTTTGCCTGTACTGGGTCTCTCTTGTTAGACCAGATTTGAGCCTGAGAGCTCTCTGGCTAACTAGGGAACCCACTGCT
>D.UG.98.98UG57143_AF484514_K.CM.96.MP535_AJ249239
GCGAGAGCGTCAATATTAAGCGGGGGAAAATTAGATGCATGGGAAAAAATTCGATTAAGGCCAGGGGGAAAGAAAAAATATAGACTGAAACATCTAGTATGGGCAAGCAGGGAACTAGACCGATTTGCACTTAATCCTGGCCTTTTAGAGACATCAGAAGGCTGTAGACAACTCATAGGACAGCTACAACCAGCCATTCAGACAGGATCAGAAGAACTTAGATCATTGTTTAATACAATAGCAACCCTATATTGTGTACATGAGAAAATAGAGGTAAAGGACACCAAGGAAGCCTTAGAAAAGATAGAGGAAGAACAAAACAAAAGTAAGAAAAAGGCACAGCAGGCAACAGCTGACACAAGGAACAGCGGCCAGGTCAGCCAAAATTATCCTATAGTACAAAACCTACAGGGACAAATGGTACACCAGTCCTTATCACCTAGAACTTTGAACGCATGGGTAAAAGTAATAGAAGAGAAGGCTTTCAGCCCCGAAGTGATACCCATGTTTACAGCATTATCAGAAGGAGCCACCCCACAAGATTTAAACACCATGCTGAACACAGTGGGGGGACATCAAGCAGCCATGCAAATGTTAAAAGAGACCATCAATGATGAAGCTGCAGAATGGGATAGGCTACATCCAGTGCAGGCAGGGCCTGTTGCACCAGGCCAGATGAGAGAACCAAGGGGAAGTGATATAGCAGGAACTACTAGTAGCCTTCAGGAACAAATAGGGTGGATGACAAGCAATCCACCTATCCCAGTAGGAGAAATCTATAAAAGATGGATAATCCTGGGATTGAATAAAATAGTAAGAATGTATAGTCCTGTCAGCATCTTGGACATAAGACAAGGACCAAAGGAACCCTTTAGAGACTATGTAGATCGGTTCTATAAAACTCTAAGAGCCGAGCAAGCTTCACAGGAGGTAAAAAGTTGGATGACTGAAACCTTATTGGTCCAAAATGCGAACCCAGACTGTAAAACTATCTTAAAATCATTGGGAACAGGGGCTACATTAGAAGAAATGATGACAGCATGTCAGGGAGTAGGGGGACCCAGTCATAAAGCAAGAGTCTTGGCTGAGGCAATGAGCCAAGCAACAAGTGCAAATGTTGCCATAATGATGCAGAGAGGCAATTTTAAGGGCCCAAAGAGAATCATTAAGTGTTTCAACTGTGGCAAAGAAGGACATATAGCAAAAAATTGCAGGGCCCCTAGGAAAAAGGGCTGTTGGAAATGTGGAAGGGAAGGACACCAAATGAAAGATTGCACTGAAAGACAGGCTAATTTTTTAGGGAAAATTTGGCCTTCCCACAAGGGGAGGCCGGGCAACTTCCTTCAGAGCAGACCAGAGCCAACAGCCCCACCAGCAGAGAGCTTCGGGTTTGGGGAAGAGATAGCCCCCTCTCAGAAAATAGCACAGGAAGACAAGGGACTGCAACCTTTAACTTCCCTCAAATCACTCTTTGGCAACGACCCATTGTTACAATAAAGATAGGGGGACAGCTAAAGGAAGCTCTATTAGATACAGGAGCAGATGATACAGTACTAGAAGAAATGAATTTGCCAGGAAAATGGAAACCAAAAATGATAGGGGGGATTGGAGGTTTTATCAAAGTAAGACAGTATGACCAAATACCCATAGAAATCTGTGGACACAAAGCTATAGGTACAGTATTAATAGGACCTACACCTGTCAACATAATTGGAAGAAATTTGTTGACTCAGATAGGATGTACTTTAAATTTTCCAATCAGTCCTATTGAAACTGTACCAGTAAAATTAAAACCAGGGATGGATGGTCCAAAAGTTAAACAATGGCCATTGACAGAAGAAAAAATAAAAGCACTAACAGAAATTTGTACAGAGATGGAAAAAGAAGGAAAAATTTCACGAATTGGGCCTGAAAATCCATACAATACCCCAATATTTGCCATAAAGAAAAAAGACAGTACTAAATGGAGAAAATTAGTAGATTTCAGAGAACTTAATAAGAGAACTCAAGATTTCTGGGAAGTTCAACTAGGAATACCGCATCCTGCAGGGCTAAAAAAGAAAAAATCAGTAACAGTACTGGATGTGGGTGATGCATATTTTTCAGTTCCCTTACATGAAGACTTTAGAAAGTATACCGCATTCACCATACCTAGTACAAACAATGAGACACCAGGGGTTAGATATCAATACAATGTGCTTCCACAAGGATGGAAAGGATCACCAGCAATATTCCAAAGTAGCATGACAAAAATCCTAGAACCTTTCAGAAAACAAAATCCAGAAATGGTTATCTATCAATACATGGATGATTTGTATGTAGGATCGGACTTAGAAATAGGGCAGCATAGAACAAAAATAGAGGAATTAAGGGAACATCTATTAAGGTGGGGATTTACCACACCAGATAAAAAACATCAGAAAGAACCTCCATTTCTTTGGATGGGTTATGAACTCCATCCGGATAAATGGACAGTGCAACCTGTAGTATTGCCAGAGAAAGAAAGCTGGACTGTCAATGATATACAGAAGTTAGTGGGGAAATTAAATTGGGCAAGCCAAATTTATCCAGGAATTAAAGTAAGACAATTATGTAAACTTCTTAGGGGAGCCAAGGCACTGACAGAAGTAATATCACTGACAGAAGAAGCAGAATTAGAACTGGCAGAAAACAGGGAGATTTTAAAAGAACCAGTCCATGGAGTGTATTATGACCCATCAAAAGACTTAATAGCAGAAATACAGAAACAAGGGCAAGGCCAATGGACATATCAAATTTATCAAGAACCATTTAAAAATCTGAAAACAGGAAAGTATGCAAAAATGAGGGGTGCCCACACTAATGATGTAAAACAATTAACAGAGGCAGTGCAAAAAATATCCCATGAATGCATAGTGATATGGGGAAAGACTCCTAAATTTAGACTACCCATACAAAAGGAAACATGGGAAGCATGGTGGATAGAGTATTGGCAGGCCACCTGGATTCCTGAGTGGGAGTTTGTCAATACCCCTCCTTTAGTTAAATTATGGTATCAGTTAGAGAAGGAACCTATAATAGGAGCAGAAACTTTCTATGTAGATGGGGCAGCTAATAAAGAGACTAAATTAGGAAAAGCAGGATATGTTACAGACAGAGGAAGACAGAAAGTTGTCCCTCTAACTGACACAACAAATCAGAAGACTGAGCTACAAGCCATTAATCTAGCTTTGCAGGATTCAGGATTAGAAGTAAACATAGTAACAGATTCACAATATGCATTGGGAATCATTCAGGCACAACCAGATAAGAGTGAATCAGAATTAGTCAGTCAAATAATAGAGCAGCTAATAAAAAAGGAAAAGGTCTACCTGGCATGGGTACCAGCACACAAGGGGATTGGAGGAAATGAACAAGTAGATAAGCTAGTCAGTAATGGAATCAGGAAGATACTATTTTTGGATGGAATAGATAAGGCTCAAGAAGAACATGAGAAATACCACAACAATTGGAGAGCAATGGCTAGTGATTTTAACCTACCACCTGTGGTAGCGAAAGAAATAGTAGCTAGCTGTGATAAATGTCAGCTAAAAGGAGAAGCCATGCATGGACAAGTAGACTGTAGCCCAGGAATATGGCAATTAGATTGTACACATTTAGAAGGAAAAGTTATCCTGGTAGCAGTTCATGTAGCCAGTGGTTATATAGAAGCAGAAGTGATTCCAACAGAAACAGGGCAGGAAACAGCCTACTTTATCTTAAAACTAGCAGGAAGATGGCCAGTAAAAGTAGTACATACAGACAATGGCGGCAATTTCATCAGTGCTGCAGTTAAGGCCGCCTGCTGGTGGGCAGGCATTAAGCAGGAATTTGGAATTCCCTACAATCCCCAAAGTCAAGGAGTAGTGGAATCTATGAATAAAGAATTAAAGAAAATTATAGGACAGGTAAGAGATCAAGCTGAACATCTTAAGACAGCAGTACAAATGGCAGTATTCATCCACAATTTTAAAAGAAAAGGGGGGATTGGGGGGTACAGTGCAGGGGAAAGAATAATAGACATAATAGCAACAGACATACAAACTAAAGAACTACAAAAACAAATCATAAAAATTCAAAATTTTCGGGTTTATTACAGGGACAGCAGAGATCCAATTTGGAAAGGACCAGCAAAGCTTCTCTGGAAAGGTGAAGGGGCAGTAGTAATACAGGACAATAACGACATAAAGGTAGTACCAAGAAGAAAAGCAAAGATCATTAGGGATTATGGAAAACAGATGGCAGGTGATGATTGTGTGGCAAGTAGACAGGATGAGGATTAGAACATGGAAAAGTTTAGTAAAACACCATATGTATATTTCAAAGAAAGCTCAAGGATGGTTGTATAGACACCACTATGACAGCCCTCACCCAAAAATAAGTTCAGAAGTACACATCCCACTAGGAGAAGCTAGATTGGTAGTAAAAACATATTGGGGTCTGCATACAGGAGAAAGAGAATGGCATCTGGGTCAGGGAGTCTCCATAGAATGGAGGAAAAGGAGATATAGCACACAAGTAGACCCTGGCCTGGCAGACCAACTAATTCATATGTATTATTTTGATTGTTTTGCAGAATCTGCTATAAGACAAGCCATATTAGGACATATAGTTAGTCCTAGGTGTGATTATCAAGCAGGACATAACAAGGTAGGATCTTTACAGTATTTGGCACTAACAGCATTAATAAAACCAAAAAAGATAAAGCCACCTTTGCCTAGTGTGAGGAAGCTAACAGAAGATAGATGGAACAAGCCCCAGAAGACCAAGGGCCACAGAGGGAGCCGAACAATGAATGGACTTTAGAGCTTTTAGAGGAGCTCAAGAGTGAAGCTGTGAGACACTTTCCTAGGGGATGGCTCCATAGCTTAGGACAGTACATCTATGAAACTTATGGGGATACCTGGGCAGGAGTTATAGCTCTAATAAGAATCCTGCAACAACTACTGTTTATTCATTTCAGAATTGGGTGTCACCATAGCAGAATAGGCATTATTCCACAGAGAAGAACAAGAAATGGATCCAGTAGATCCTAAACTAGAGCCCTGGAACCATCCAGGAAGTCAGCCCGGGACTCCTTGTAACAAATGTTATTGTAAAAAGTGTTGCTATCATTGCCAAGTTTGCTTCTTAACAAAAGGCTTAGGCATCTCCTATGGCAGGAAGAAGCGGAGCCAGCGACGAAGACCTCATCAGGGTGGTCAGGCTTATCAAGATCCTCTACGAAAGCAGTGAGTAGTGCTAAGTAGTACATGTAATGGTGTCCTTAGCAATTTCAATAGTAGCATTAGTAGTAGCACTAATATTAGCAATAATTGTATGGACCATAGTATATATAGAATATAGGAAATTGGTAAAACAAAAAAGAATAAACTGGTTAATAGATAGAATAAGAGAAAGAGCAGAAGACAGTGGCAATGAGAGTGATGGGGACAGAGAGGAACTATCAGGACTTGTGGAGATGGGCCATCATGCTCCTTGGGATGTTGATGACATGTAGTGTTGCAGAAAAGTGGGTCACAGTTTATTATGGGGTACCTGTGTGGAGAGAAGCAGACACCACTCTATTTTGTGCATCAGATGCTAAAGCATATAAAACAGAGGCACATAATATCTGGGCTACACATGCCTGTGTACCAACAGACCCCAATCCACAAGAAATAGCACTGGAAAATGTCACTGAGAATTTTAATATGTGGAAAAATAACATGGTGGAGCAGATGCATGAGGATATAAAAAGTTTATGGGATCAAAGCCTAAAACCATGTGTAAAATTAACCCCACTCTGTGTCACGTTAAACTGCACTGATGCTCAAGGGGAACTGATGAAGGAAGACATGAAAAACTGCTCTTTCAATACAACCACAGTATTAAGAGATAAGCAGCAGAAAGCATATGCACTTTTTTATAGACTTGATTTGGTACAACTAAATAATACCAATGATAATACCAATTATACCAGTTATATATTAATAAATTGCAATACTTCAACCATTACACAGGCTTGTCCAAAGGTATCCTTTGAGCCAATTCCCATACATTATTGTGCCCCAGCTGGTTTTGCGATTCTAAAGTGTAACGATAAGCAGTTCAATGGAACAGGCCCATGCAAGAATGTCAGCACAGTACAATGTACACATGGAATTAAGCCAGTGGTGTCAACTCAACTGCTGTTGAATGGCAGTCTAGCAGAAGAAAACATAATAATTAGATCTGAAAATATCACAGACAATGCTAAAACAATAATAGTACAGTTTACGGAGGGTGCACAAATTAATTGTACAAGGCCCTCCAACAATACAAGACAGAGCATACATATAGGACCAGGGCAAGCACTCTTTGCAAACAAGATAATAGGAGATATAAGACAAGCACATTGTAATATTAATGGAACACAATGGAACAAAACTTTACAACAGGTAGCTAAAAAATTAGGAGACCTTTTTAACCAGACAATAATTTTTAATTCATCCTCAGGAGGGGACCCAGAAATTACAACACACAGCTTTAATTGTGGAGGGGAATTTTTCTACTGCAATACATCAAAACTGTTTAATAGTACCTGGAATAATGGTACAGTAAATAGTACAGATACAGTAAATAGTATAATCACAATCCCATGCAGAATAAAACAAATTATAAACATGTGGCAGGAAGTAGGAAAAGCAATGTATGCCCCTCCCATAGAAGGACTAATCATGTGTAATTCAAATATTACAGGGCTATTACTGACAAGAGATGGTGGTATAAATACTAGTGATGAGAATGAGACTTTCAGACCTGGAGGAGGGAATATGAAAGATAATTGGAGAAGTGAATTATACAAATATAAGGTGGTAAGAATTGAACCACTAGGAATAGCACCCACCACGGCGAAGAGGAGAGTGGTGGAAAGAGAAAAAAGAGCAATAGGATTAGGAGCTTTGTTCCTTGGGTTCTTGGGAGCAGCAGGAAGCACGATGGGCGCAGCGTCATTGACGCTGACGGTACAGGCCAGACAATTATTGTCTGGTATAGTGCAACAGCAAAACAATTTGCTGAGGGCTATAGAGGCGCAACAGCATCTGTTGCAACTCACAGTCTGGGGCATTAAACAGCTCCAGGCAAGAGTCCTGGCTGTGGAAAGATACCTACAGGATCAACAGCTCCTAGGAAGTTGGGGTTGCTCTGGAAGACACATTTGCACCACTACTGTGCCCTGGAACTCTAGTTGGAGTAATAAATCTATAGATGAGATTTGGAATAACATGACTTGGATGGAGTGGGAAAAAGAAATTGCCAATTACACAGATTTAATATACACATTAATTGAGGAATCGCAAACCCAGCAAGAAAAGAATGAACAAGAACTATTGCAATTGGACAAATGGGCAAGTCTGTGGAATTGGTTTAGCATAACAAACTGGCTGTGGTATATAAAAATATTCATAATGATAGTAGGGGGCTTGATAGGATTAAGAATAGTTTTTACTGTGCTTTCTTTAGTAAATAGAGTTAGGCAGGGATACTCACCTCTATCGTTTCAGACCCTCTTCCCAGCCCCGAGGGAACCCGACAGGCCCGAAGGAATAGAAGAAGAAGGTGGAGAGCAAGGCAGAGGCAGATCCATTCGCTTGGTGAACGGATTCTCAGCACTTATCTGGGACGATCTGAGGAACCTGTGCCTCTTCAGTTACCACCGCTTGAGAGACTTAATCTTAATTGCAACGAGGATTGTGGAACTTCTGGGACGCAGGGGGTGGGAGGCCCTCAAATATCTGTGGAATCTCCTGCAGTATTGGATTCAGGAACTGAAGAATAGTGCTATTAGCTTGCTTAATACCACAGCAATAGTAGTAGCTGAGGGGACAGATAGGGTCATAGAACTAGTACAAAGAGCTTTTAGAGGTATTCTTAACATACCCAGGAGAATAAGACAGGGCTTGGAAAGGGCTTTACTATAAAATGGGTGGCAAATGGTCAAAACGTATGGCTGGGTGGCCTACTATAAGGGAAAGGATAAGAAGAACTGATCCAGCAGAGCCAGCAGCAGAGGGGGTGGGAGCAGTATCTCGAGACCTGGAAAAATATGGGGCAATCACAAGTAGCAATACAGTAGAGACTAATCCTGACTGTGCCTGGCTAGAAGCGCAACAAGAGGATGAGGAGGTGGGTTTTCCAGTTAGACCTCAGGTACCATTAAGACCAATGACTTACAAAGGAGCTTTAGATCTAAGCCATTTTTTAAAAGAAAAGGGGGGACTGGATGGGTTAATTTGGTCCCAGAAAAGACAAGATATCCTTGATCTTTGGGTCTACAACACACAAGGCTACTTCCCTGATTGGCATAACTACACACCAGGGCCAGGGCCTAGATATCCACTGACCTTTGGATGGTGCTTCGAGCTAATACCAGTTGATCCAAAGGAGGTAGAAGAGGCCGCTGAAGGAGAGAACAACTGCTTGTTACACCCTATAAACCAGCATGGAATGGAGGACCCGGAGAGAGAAGTGTTGGTGTGGAAATTTAACAGCAGGCTAGCATTTGAACACATGGCCCGAATGAAGCACCCAGAGTTCTACAAAAACTGCTGACACCGAGAACTGCTGACACCGAGTTTCTACAAGGGACTTTCCGCTGGGGACTTTCCAGAGAGGCGTAACCGGGGCGGGACTGGGGAGTGGTCAACCCTCAGATGCTGCATATAAGCAGCTGCTTTTTGCCTGTACTGGTTCTCTCTAGTTGGACCAGATTTGAGCCTGAGAGCTCTCTGGCTAGCTAGGGAACCCACTGCT
>F1.BR.89.BZ126_AY173957_F2.CM.97.CM53657_AF377956
CAGTGGCGCCCGAACAGGGACGCGAAAGCGAAAGTAGAACCAGAGAAGATCTCTCGACGCAGGACTCGGCTTGCTGAAGTGCACACGGCAAGAGGCGAGAGGGGCGACTGGTGAGTACGCCAAATTTTGACTAGCGGAGGCTAGAAGGAGAGAGATGGGTGCGAGAGCGTCAGTATTAAGCGGGGGAAAACTAGATGCATGGGAAAAAATTCGGTTGAGGCCGGGGGGAAAGAAAAAATATAGATTGAAGCATCTAGTATGGGCAAGCAGGGAGCTAGAACGATTTGCAATTAATCCTGGCCTTCTAGAAACATCAGAAGGCTGTCAAAAAATAATAGGACAGTTACAACCATCCCTTCAGACAGGATCAGAAGAGCTTAGATCATTATATAATACAGTAGCAGTCCTCTATTTTGTACATCAAAGRATAGAGGTAAAGGACACCAAGGAAGCTTTAGACAAGCTAGAGGAAGAACAAAACAAAAATCAGCAAAAGACAAAGCAAGCGGCAGCTGACAAAGGGGTCAGTCAAAATTACCCTATAGTACAGAATCTTCAGGGACAAATGGTACATCAGTCTATATCACCTAGAACTTTAAATGCATGGGTAAAGGTGATAGAAGAGAAGGCTTTTAGCCCAGAAGTAATACCCATGTTTTCAGCATTATCAGAAGGGGCCACTCCACAAGATTTAAACACCATGTTAAATACAGTGGGGGGACATCAAGCAGCCATGCAAATGTTAAAAGACACCATCAATGAGGAAGCTGCAGAATGGGACAGATTACATCCAGCGCAGGCAGGACCTATCCCACCAGGCCAGATAAGGGAACCTAGGGGAAGTGATATAGCTGGAACTACTAGTACCCTTCAGGAACAAATACAATGGATGACAAGCAACCCACCTGTCCCAGTGGGAGAAATCTATAAAAGATGGATCATCCTAGGATTAAATAAAATAGTAAGAATGTATAGCCCTGTCAGCATTTTGGACATAAGACAAGGGCCAAAGGAGCCCTTTAGAGACTATGTAGACAGGTTCTTTAAAACCCTAAGAGCTGAGCAAGCTACACAGGAAGTAAAGGGTTGGATGACAGACACCTTGTTGGTCCAAAATGCGAACCCAGATTGTAAGACCATTTTAAAAGCATTGGGACCAGGGGCTACACTAGAAGAAATGATGACAGCATGTCAGGGAGTGGGAGGACCTGGCCATAAGGCGAGAGTTTTGGCTGAGGCAATGAGCCAAGCAACAAATGCAACTATACTGATGCAGAAAAGTAACTTTAAGGGCCAAAGAAGAATTGTTAAATGTTTTAATTGTGGCAAAGCAGGACACATAGCCAAAAATTGTAGGGCCCCTAGAAAAAAGGGCTGTTGGAAATGTGGAAGAGAAGGACACCAAATGAAAGACTGCACTGAAGGACAGGCTAATTTTTTAGGGAAAATTTGGCCTTCCCACAAGGGGAGGCCCGGAAATTTCCTTCAGAACAGGCCAGAGCCAACAGCCCCACCAGCAGAGAGCTTCGGGTTCAGAGAGGAGATAAACCCCTCTCCGAAGCAGGAGCAGAAAGAAGAGGGACTGTACCCTCCCTTAGCTTCCCTCAAATCACTCTTTGGCAACGACCACTAGTCACAATAAAAGTAGGGGGACAGCTAAGGGAAGCTCTATTAGATACAGGAGCAGATGATACAGTATTAGAAGACATAAATTTGCAAGGAAAATGGAAACCAAAAATGATAGGGGGAATTGGAGGTTTTATCAAAGTAAAACAGTATGATAACATACTTATAGAAATTTGTGGACACAAGGCTATAGGTACAGTGTTGGTAGGACCTACGCCTGTCAACATAATTGGAAGAAACATGTTGACTCAGATTGGTTGTACTTTAAATTTTCCAATTAGTCCTATTGAAACTGTACCAGTAAAATTGAAGCCAGGAATGGATGGCCCAAAGGTTAAACAATGGCCATTGACAGAAGAAAAAATAAAAGCATTAACAGAAATATGTACAGAAATGGAAAAAGAAGGAAAAATTTCAAAAATTGGGCCTGAAAATCCATACAATACTCCAGTATTTGCCATAAAGAAAAAAGACAGTACTAAATGGAGAAAATTAGTAGATTTCAGAGAACTTAATAAAAGAACTCAAGATTTTTGGGAGGTTCAATTAGGAATACCACATCCTGCAGGGTTAAAAAAGAAAAAGTCAGTAACAGTACTGGATGTAGGGGATGCATATTTCTCAGTTCCCTTAGATAAGGATTTCAGGAAGTACACTGCATTCACCATACCTAGTGTCAACAATGAGACACCAGGAATTAGGTACCAGTACAATGTGCTTCCACAAGGATGGAAAGGATCACCAGCAATATTCCAATGTAGCATGACAAAAATCTTAGATCCCTTTAGAACAAAAAATCCAGACTTAGTTATCTACCAATACATGGATGATTTGTATGTAGGGTCTGACTTAGAAATAGGGCAGCATAGAACAAAAGTAGAGGAGTTAAGAGAACATCTACTGAAATGGGGATTTACTACACCAGACAAAAAACATCAAAAAGAACCCCCATTCCTTTGGATGGGGTATGAACTCCATCCTGATAAATGGACAGTGCAGCCTATACAATTGCCAGACAAGGATAGCTGGACTGTCAATGATATACAGAAGTTAGTAGGAAAACTAAATTGGGCAAGTCAGATTTATCCAGGGATTAAAGTAAAGCAATTATGTAAACTCCTTAGRGGAGCYAAGACACTAACAGACATAGTGCCACTGACTACAGAAGCAGAGTTAGAATTGGCAGAGAATAGGGAGATTCTAAAAGAACCAGTACATGGGGTATATTATGACCCGTCAAAAGACTTAATAGCAGAAATACAGAAACAAGGGCATGGGCAATGGACATATCAAATTTATCAAGAGCCATTTAAAAATCTAAAAACAGGAAAGTATGCAAAAATGAGGTCTGCCCACACTAATGATGTAAAACAATTAACAGAAGCAGTGCAAAAGATAGCTCTAGAAAGCATAGTAATATGGGGAAAGACTCCTAAGTTTAAACTACCCATACTAAAAGAGACATGGGACACATGGTGGACAGAGTATTGGCAAGCCACCTGGATTCCTGAATGGGAGTTTGTCAATACCCCCCCTCTAGTAAAACTATGGTATCAGCTAGAAACAGAGCCCATAGCAGGAGCAGAAACCTTCTATGTAGATGGGGCAGCTAATAGAGAGACCAAAAAAGGAAAAGCAGGATATGTTACTGACAGAGGAAAACAAAAGACTGTCTCCCTAACCGAGACCACAAATCAGAAGGCTGAGTTACAAGCAATTCAGTTAGCTTTACAGGATTCAGGATCAGAAGTGAACATAGTAACAGACTCACAGTATGCATTAGGAATCATTCAAGCACAACCAGATAAGAGTGAATCAGAGTTAGTCAATCAAATAATAGAGCAATTAATACAAAAGGAAAAGGTCTACCTGTCATGGGTACCAGCACACAAAGGGATTGGAGGAAATGAACAAGTAGATAAATTAGTCAGTGCTGGAATCAGAAAAATACTGTTTTTAGATGGGATAGATAAAGCACAGGAGGAACATGAAAAATATCACAACAATTGGAGAGCAATGGCTAGTGATTTTAATCTGCCACCTGTAGTAGCAAAAGAAATAGTAGCTAGCTGTGATAAGTGTCAGCTAAAAGGGGAAGCCATGCATGGACAAGTAGATTGTAGTCCAGGGATATGGCAATTAGATTGTACACATTTAGAAGGAAAAGTTATTCTAGTAGCAGTCCATGTAGCTAGTGGGTACCTAGAAGCAGAAGTKATCCCAACAGAAACAGGGCAAGAAACAGCCTACTTCATACTAAAGTTAGCAGGAAGATGGCCAGTAAAAACAATACATACAGACAATGGCACTAATTTCACCAGTGCCGCGGTTAAGGCAGCCTGTTGGTGGGCAGGTATCCAGCAGGAGTTTGGAATTCCCTACAACCCCCAAAGTCAAGGAGTAGTAGAATCTATGAATAAAGAGCTAAAGAAGATCATAAGACAGGTAAGAGATCAAGCTGAACATCTTAAGACAGCAGTACAAATGGCAGTATTCATCCACAATTTTAAAAGAAAAGGGGGGATTGGGGGATACAGTGCAGGGGAAAGAATAATAGACATAATATCATCAGACATACAAACTAAAGAATTACAAAAACAAATTATAAAAATTCGAAATTTCCGGGTTTATTACAGGGACAGCAGAGACCCAGTTTGGAAAGGACCAGCAAAGCTACTCTGGAAAGGTGAAGGGGCAGTAGTCATACAAGACAATAGTGAAATAAAGGTAGTACCAAGAAGAAAAGCAAAGATCATTAGGGATTATGGAAAACAGATGGCAGGTGATGATTGTGTGGCAGGTAGACAGGATGAGGATTAACACATGGAAAAGTTTAGTAAAATACCATATGTATGTTTCAAAGAAAGCCAAAAGATGGTCTTATAGACATCACTTTGAAAGCAGGAATCCAAGAGTAAGTTCAGAAGTACACATTCCATTAGAGGAAGCTAAATTAATAATAACAACATACTGGGGGCTGCATACAGGAGAAAGAGATTGGCATCTGGGTCAGGGAGTCTCCATMGAATGGAGGCAGGGGAGGTATAGCACACAAATAGACCCTGGCCTGGCAGACCAACTGATCCATATATATTATTTTGATTGTTTTGCAGAATCTGCCATAAGGAAAGCCATATTAGGACATAAAGTTAGCCCTAGGTGTAACTATCAAGCAGGACATAACAAGGTAGGATCTCTACAATATTTGGCACTAAYAGCATTAATAGCTCCAAAGAAGACAAAGCCGCCTTTGCCTAGTGTCAAGAAACTAGTAGAAGACAGATGGAACGAGCCCCAGGAGACCAGGGGCCACAAAGGGAGCCATACAATGAATGGACACTAGAGCTTTTAGAGGAGCTTAAGAATGAAGCTGTTAGACATTTTCCTAGGCCCTGGCTACATGGCTTAGGACAACATATCTATAACACCTATGGGGATACTTGGGAGGGAGTTGAAGCTATAATAAGGATATTGCAACAACTACTGTTTATCCATTTCAGAATTGGGTGCCAGCATAGCAGAATAGGCATTACTCGACAGAGAAGAGTAAGAAATGGAGCTAGTAGATCCTAACTTAGACCCCTGGAACCATCCAGGAAGCCAGCCTGCAACTCCTTGTACCAAATGCTATTGTAAACGATGTTGCTTTCATTGTCAATGGTGCTTTACAACAAAGGGCTTAGGCATCTCCTATGGCAGGAAGAAGCGGAAACAGCGACACCGAACTCCTCAGAGCAGTCAGATACATCAAGATCTTGTACCAAAGCAGTAAGTAATATATGTAATGTCCTACTTTTTAGCAATAAGCATAACAGCATTAATAGTAGCATTAATAATAGCAATAGTTGTGTGGACTATAGCATATATAGAATATAGGAAACTGTTAAGGCAAAGAAAAATAAATAGGTTATATGAAAGAATAAGAGAAAGAGCAGAAGACAGTGGCAATGAGAGTGAGGGGGATGCAGAGGAATTGGCAGCACTTGGGGAAATGGGGCCTTTTATTCCTGGGGATATTGATAATCTGTAATGCTGAAAACTTGTGGGTCACAGTCTATTATGGGGTACCTGTGTGGAAAGAAGCAACCACTACTCTATTCTGTGCATCAGATGCTAAATCATATGAAAAAGAGGTACATAATGTCTGGGCTACACATGCCTGTGTACCCACAGATCCCAATCCACAAGAAGTAGTTCTGGAAAATGTAACAGAAAATTTTGATATGTGGAAAAATAACATGGTAGAACAAATGCATACAGATATAATCAGTTTATGGGATCAAAGCCTAAAGCCATGTGTGAAGTTAACCCCACTCTGTGTTACTTTACATTGTACTAGTGCCACTCCTAATGCCACTGCCACTCAAAACGGAACAACCCTGAAGGAAGAACCAGGGGCAATACAAAACTGTTCTTTCAATATGTCCACAGAAGTAAGRRATAAGCAGCAGAAAGTACATGCACTTTTTTATAAACTTGATATAGTACCAATTAGCAATAGCAGTAATAACAGTAGAGAATACAGACTAATACATTGCGATACCTCAACCATTACACAGGCTTGTCCAAAGGTATCTTGGGATCCAATTCCCATACATTATTGTGCTCCAGCTGGTTATGCGATTCTAAAATGTAATGATAAAAAGTTCAATGGGACGGGACCATGCAAGAATGTCAGCACAGTACAATGTACACATGGAATTAAACCAGTGGTATCAACTCAATTGTTGTTAAATGGCAGCCTAGCAGAAGAAGATATAATAATCAGATCCCAAAATATCTCAGATAATGCAAAAACCATAATAGTACACTTTAATGAATCTGTACAGATTAATTGTACAAGACCCAACAACTATACAAGAAAAAGTATATATTTWGGACCAGGACGAGCATTTCATACAGCAGGAAAAATAATAGGAGACATCAGAAAGGCCCATTGTAACGTTAGTGGAACACAATGGAATAAAACATTAGAACGGGTAAGGGCAAAGTTAAAGTCTCATTTCCCTAATACAACAATAAAATTTAAMTCATCCTCAGGAGGGGACCTAGAAATTACAATGCATAGTTTTAATTGTAGAGGAGAATTTTTCTACTGCAATACATCAGGACTGTTTAATGACACAGGATCCAATGGCACTATCACTCTCCTATGTCGCATAAGACAAATTGTAAACATGTGGCAGGAAGTAGGACGAGCAATGTATGCCGCTCCCATTGAAGGAAACATTACCTGTAACTCAAATATTACAGGTCTACTATTGACAAGAGATGGTGGTCAGAATAGTAATCAGACTGAGACCTTCAGACCTGGGGGAGGAAATATGAAAGACAATTGGAGAAGTGAATTATATAAGTATAAAGTAGTAGAAATTGAACCACTAGGAGTAGCACCCACCAGGGCAAAAAGACAAGTGGTAAAGAGAGAAAAAAGAGCAGCAGTAATAGGAGCTTTGTTCCTTGGGTTCTTGAGCGCGGCAGGAAGCACTATGGGCGCGGCGTCAATAGCGCTGACGGTACAGGCCAGACAATTATTGTCTGGAATAGTGCAACAGCAGAGCAATCTGCTGAGGGCTATTGAAGCGCAACAGCATCTGTTGCAGCTCACAGTCTGGGGCATTAAACAGCTCCAGGCAAGAGTCCTGGCTGTGGAAAGATACCTACAGGATCAACAGCTCCTAGGACTTTGGGGCTGCTCTGGAAAACTCATCTGCACCACTAATGTGCCCTGGAACTCTAGTTGGAGTAATAAATCTCAGGAGGAGATTTGGGAGAACATGACCTGGATGGAGTGGGAAAAGGAGATTAGCAATTACTCATACGAGATATACAGGTTAATTGAACAATCACAGAACCAGCAGGAAAAGAATGAACAAGAATTATTGGCATTGGACAAATGGGCAAGTCTGTGGAATTGGTTTGACATATCAAATTGGCTGTGGTATATAAAAATATTCATAATGATAGTAGGAGGCTTGATAGGCTTAAGAATAGTTTTTGCTGTGCTTTCTATAGTAAATAGAGTTAGGAAGGGATACTCACCTTTGTCATTACAGACCCATATCCCAAGCCCGAGGGAACCCGACAGGCCCGAAGGAATCGAAGAAGGAGGTGGAGAGCAAGGCAACGAGAGATCCGTGCGCTTAGTGAACGGATTCTTACCTCTTGTCTGGGACGACCTGAGGAACCTGTGCCTCTTCAGCTACCGCCACTTGAGAGACTTAATATTAATAGCAGCGAGGATTGTGAACAGGGGGCTGAGGAGGGGGTGGGAAGCCCTCAAACTTCTGGGGAATCTCACGCTGTATTGGGGTCAGGAACTAAAGAATAGTGCTATTAGCTTGCTTAACACCACAGCAATAGTAGTAGCTGAGGGAACAGATAGAATTATAGCAGCTTTGCAAAGAATTGGTAGAGCTATTCTTAACATACCTACAAGAATAAGACAGGGCTTCGAAAGGGCTTTGCTGTAAAATGGGTGGCAAGTGGTCAAAAAGTAGCATAGTTGGATGGCCTGCTATAAGGGAAAGAATGAGACGAGCCCCTCCAGCAGCAGAARGGGAGGGAGCAGCTCCAGCAGCAGAAGGGGTGGGAGCAGTRTCTCAAGACTTAGAAAGAAGGGGGGCAATTACAAGCARCAATACTAGAGCTAATAATCCTGACTTGGCCTGGCTRGAAGCACAAGAGGATGAAGAAGTAGGCTTTCCAGTCAAACCTCAGGTACCTTTAAGACCAATGACTTATAAGGCAGCTTTCGATCTCGGCTTCTTTTTAAAAGAAAAGGGGGGACTGGAAGGGTTAATTTATTCCAAGAGAAGACAAGAAATCCTTGATCTGTGGGTCTACCACACACAAGGCTACTTCCCTGATTGGCAGAACTACACACCAGGGCCAGGGACTAGATATCCACTGACCTTTGGATGGTGCTTCAAGCTAGTACCAGTTGAGCCAGAGGAGGTAGAAAAGGCCAATGAAGGAGAGAACAACTGTTTATTGCACCCTATGAGCCAACATGGAATGGATGATGAAGACGGAGAAGTACTGATGTGGAAGTTTGACAGCAGCCTGGCACGGAGACACATAGCCAGAGAGAAACATCCGGAGTTCTACCAAGGCTGAGACTGCTGACACAGAGATTGCTGACACAGAAGAATCTAAAGGGACTTTCCACTGGGGACTTTCCAGAGGGCGGGCCAGAGGGCGGTACTGGGGAGTGGCTCACCCTCAGATGCTGCATATAAGCAGCCGCTTTTCGCCTGTACTGGGTCTCTCTAGTTAGACCAGATTTGAGCCCGGGAGCTCTCTGGCTAGCTAGGGAACCCACTGCTTAAGCCTCAATAAAGCTTGCCTTGAGTGCTTCAAGTAGTGTGTGCCCGTCTGTTGTGTGACTCTGGTAACTAGAGA
>F1.FI.93.FIN9363_AF075703_G.NG.01.01NGPL0760_DQ168579
AAAGCGAAAGTAGAACCAGAGAAGATCTCTCGACGCAGGACTCGGCTTGCTGAAGTGCACACGGCAAGAGGCGAGAGCGGCGACTGGTGAGTACGCCAATTTTTGACTAGCGGAGGCTAGAAGGAGAGAGATGGGTGCGAGAGCGTCAGTATTAAGCGGGGGAAAACTAGATGCATGGGAAAAAATTCGGTTAAGGCCGGGGGGAAAGAAACAATATAGAATAAAACATCTAGTATGGGCAAGCAGGGAGCTAGAACGATTTGCAATAGATCCTGGCCTTCTAGAAACATCAGAAGGCTGTCAAAAAATAATAGCACAGATACAGCCATCCATTCAGACAGGATCAGAAGAGCTTAGATCATTATATAACACAATAGCAGTCCTCTATTTTGTACATCAAAAGATAGAGGTAAAGGACACCAAGGAAGCTTTAGATAAGCTAGAGGAAGAACAAAACAAAAGTCAGCAAAAGACACAGCAAGCGGCAGCTGCAGCTGACAAAGGGGTCAGTCAAAATTACCCTATAGTACAGAATCTTCAGGGACAAATGGTACATCAGGCTATATCACCTAGAACTTTAAATGCATGGGTAAAGGTGATAGAAGAGAAGGCTTTTAGCCCAGAAGTTATACCCATGTTTTCAGCATTATCAGAAGGGGCCACTCCACAAGATTTAAACACCATGCTAAATACAGTGGGGGGACATCAAGCAGCCATGCAAATGTTAAAAGACACCATTAATGAGGAAGCTGCAGAATGGGACAGATTACATCCAGTGCATGCAGGACCTATTCCACCAGGCCAGATGAGGGAACCTAGGGGAAGCGATATAGCTGGAACTACTAGTACCCTTCAGGAACAAATACAATGGATGACAAGTAACCCACCTGTCCCAGTGGGAGACATCTATAAAAGATGGATCATCCTAGGATTAAATAAAATAGTAAGGATGTATAGCCCTGTCAGCATTTTGGACATAAGACAAGGGCCAAAAGAACCCTTTAGAGACTATGTAGACAGGTTCTTTAAAGCTCTAAGAGCTGAGCAAGCTACACAGGAAGTAAAGGGTTGGATGACAGACACCTTGTTGGTCCAAAATGCGAATCCAGATTGTAAGATCATTTTAAAAGGATTGGGAATAGGGGCTACACTAGAAGAAATGATGACAGCATGTCGGGGAGTGGGAGGACCTGGCCATAAGGCAAGAATTTTGGCTGAGGCAATGAGCCAAGCAAATACAACCATAATGATGCAGAAAAGTAATTTTAGGGGCCAAAGAAGAATTGTTAAATGTTTTAATTGTGGCAAAGAAGGACACATAGCCAGAAATTGCAGGGCCCCCAGGAAAAAGGGCTGTTGGAAATGTGGACAAGAAGGGCACCAAATGAAAGACTGCACTGAAAGACAGGCTAATTTTTTAGGGAAAATTTGGCCTTCCAACAAGGGGAGGCCCGGAAATTTCCTTCAGAGTAGACCAGAGCCAACAGCCCCGCCAGCAGAGAGCCTCGGGATCAGAGAAGAGGTAACTCCCTCTCCGAGGCAGGAGCAGAAAGAAGAGGGACAGTACCCTCCCTTAGCTTCCCTCAAATCACTCTTTGGCAACGACCCCTAGTCACAATAAAAATAGGGGGACAGCTAAAGGAAGCTCTATTAGATACAGGAGCAGATGATACAGTATTAGAAGACATAAATTTGCCAGGAAAATGGAAACCAAAAATGATAGGGGGAATTGGAGGTTTTATTAAAGTAAAACAGTATGATCACATACTCATAGAAATTTGTGGACATAAAGCCATAGGTACAGTGTTAGTAGGACCTACGCCTGTCAACATAGTTGGAAGAAATATGTTGACTCAAATTGGTTGTACTTTAAATTTTCCAATTAGTCCTATTGAAACTGTACCAGTAAAACTGAAACCAGGAATGGATGGCCCAAAGGTTAAACAATGGCCATTGACAGAAGAAAAAATAAAAGCATTAACAGAGATATGTACAGATATGGAAAAAGAAGGAAAAATTTCAAGAATTGGGCCTGAAAATCCATACAATACTCCAGTATTTGCCATAAAGAAAAAAGACAGTACTAAATGGAGGAAGTTAGTAGATTTCAGAGAACTCAATAAAAGAACTCAAGATTTTTGGGAGGTTCAATTAGGAATACCACATCCTGCAGGGTTAAAAAAGAAAAAGTCAGTAACAGTACTGGATGTGGGGGATGCATATTTTTCAGTTCCCTTAGATAAAGATTTCAGGAAGTACACTGCATTCACCATACCTAGTGTCAACAATGAGACACCAGGAATTAGGTACCAGTACAATGTGCTTCCACAAGGATGGAAAGGATCACCAGCAATATTCCAATGTAGCATGACAAAAATCTTAGAGCCCTTTAGAACAAGAAATCCAGACATAGTTATCTACCAATACATGGATGATTTGTATGTAGGGTCTGACTTAGAAATAGGGCAGCATAGAACAAAAATAGAGGAGTTAAGAGAACATCTACTGAAATGGGGATTTACTACACCAGACAAAAAACATCAGAAAGAACCTCCATTCCTCTGGATGGGGTATGAACTCCATCCTGATAAATGGACAGTGCAGCCTATACAATTGCCAGACAAGGACAGCTGGACTGTCGATGATATACAGAAATTAGTAGGAAAACTAAACTGGGCAAGTCANATTTATCCAGGGATTAAAGTAAGGCAATTATGTAAACTCCTTAGAGGAGCCAAGGCACTAACAGACATGGTGCCACTGACTGCAGAAGCAAATTTAGAATTGGCAGAAAATAGGGAGATTCTAAAAGAACCAGTACATGGGGTATATTATGACCCATCAAAAGACTTAATACCAAAATTACAGAAACAAGGGCAAGGACAATGGACATATCAAATTTACCGAGAGCCATTTAAAAATCTAAAAACAGGAAAGTATGCAAAAATGAGGTCTGCCCACACTAATGATGTAAAACAATTAACAGAAGCAGTGCAAAAGATAGCTCTAGAAAGCATAGTAATATGGGGAAAGACTCCTAAGTTTAAACTACCTATTCTAAAAGAGACATGGGATACATGGTGGACAGAGTATTGGCAAGCCACCTGGATTCCTGAGTGGGAGTTTGTCAATACCCCCCCTCTAGTAAAACTATGGTATCAATTAGAAACAGAGCCCATAGCAGGAGCAGAAACATTCTATGTGGATGGGGCATCTAATAGAGAGACCAAAAAAGGAAAAGCAGGATATGTTACTGATAGAGGAAGACAAAAGGTTGTCTCCCTAACTGAGACCACAAATCAGAAGGCTGAGTTACAAGCAATTCATTTAGCTTTACAGGATTCAGGATCAGAAGTGAACATAGTAACAGATTCACAATATGCATTAGGAATCATTCAAGCACAACCAGATAAGAGTGAATCAGAGTTAGTCAATCAAATAATAGAGCAGTTAATACAAAAGGAAAAGATCTACCTGTCATGGGTACCAGCACACAAAGGGATTGGAGGAAATGAACAAGTAGATAAATTAGTCAGTGCTGGAATCAGAAAAATACTGTTTTTAGATGGGATAGATAAGGCACAAGAGGAACATGAAAAATATCACAACAATTGGAGAGCAATGGCTAGTGATTTTAATCTGCCACCTGTAGTAGCAAAAGAAATAGTAGCTAGCTGTGATAAGTGTCAGCTAAAAGGGGAAGCCATGCATGGACAAGTAGACTGTAGTCCAGGGATATGGCAATTAGATTGTACACATTTAGAAGGAAAAATTATCCTGGTAGCAGTCCATGTAGCTAGTGGATACATAGAAGCAGAAGTTATCCCAGCAGAAACAGGACAGGACACAGCCTACTTCATACTAAAGTTAGCAGGAAGATGGCCAGTAAAAATGATACATACAGACAATGGCAGCAATTTCACCAGTGCCGCGGTTAAGGCAGCCTGTTGGTGGGCAGGTATCCAGCAGGAATTTGGAATTCCCTATAACCCCCAAAGTCAAGGAGTAGTAGAATCAATGAATAAAGAGCTAAAGAAGATCATAGGACAGGTAAGAGATCAAGCTGAACATCTTAAGACAGCAGTACAAATGGCAGTATTCATCCACAATTTTAAAAGAAAAGGGGGGATTGGGGGGTACAGTGCAGGGGAAAGAATAATAGACATAATAGCAACAGACATACAAACTAAAGAATTACAAAAACAAGTTACAAAAATTCAAAATTTCCGGGTTTATTACAGGGACAGCAGAGACCCAGTTTGGAAAGGACCAGCAAAGCTACTCTGGAAAGGTGAAGGGGCAGTAGTCATACAAGACAATAGTGAAATAAAAGTAGTGCCAAGAAGAAAAGCAAAGATCATTAGGGATTATGGAAAACAGATGGCAGGTGACGATTGTGTGGCAGGTAGACAGGATGAGGATTAACACATGGAAAAGTTTAGTAAAATACCATATGCATGTTTCAAAGAAAGCCAAAAGATGGTTTTATAGACATCACTTTGAAAGCAGACATCCAAAAATAAGTTCAGAAGTACACATCCCCCTAGAGGAAGCTGAATTAGTAATAACAACATATTGGGGGCTGAATACAGGAGAAAGAGATTGGCATCTGGGTCAAGGAGTCTCCATAGAATGGAGGCAGGGGAGGTATAGGACACAAATAGACCCTGGCCTGGCAGACCAACTGATCCATATATATTACTTTGATTGTTTTTCAGAATCTGCCATAAGGAAAGCCATATTAGGACATAGAATTAGCCCTAGGTGTGACTATCAAGCAGGACATAACAAGGTAGGATCCCTACAATATTTGGCACTAACAGCATTAGTATCTCCAAAGAAGGCAAAGCCGCCTTTGCCTAGTGTCAAGAAACTAGTAGAAGACAGATGGAACAAGCCCCAGGAGATCAGGGGCCACAGAGGGAGCCATACAATGAATGGGCACTAGAACTTTTAGAGGAGCTTAAGAACGAAGCTGTTAGACATTTTCCTAGGCCATTCCTCCATGGCATAGGACAATATATCTATAACACCTATGGGGATACTTGGGAGGGAGTTGAAGCCATAATAAAAATATTGCAGCAACTACTGTTTATCCATTTCAGAATTGGGTGCCATCATAGCAGAATAGGCATTATTCGACAGAGAAGAGTAAGAAATGGAGCTAGTAGATCCTAATTTAGATCCCTGGAACCATCCAGGAAGCCAGCCTCCAACTCCTTGTAACAAATGCTATTGTAAACGGTGTTGCTTTCATTGCTACTGGTGCTTTGCAACGAAGGGCTTAGGCATCTCCTATGGCAGGAAGAAGCGGAGACAGCGACACAGAACTCCTCAAAGCAGTCAAATACATCAAGATCCTGTACCAAAGCAGTAAGTATTGTTAAGTAGTGTATGTAATGTCAGATTTGTTAGCAATAACGATAGTAGCATTTATAGTAGCCCTAATAATAGTAATAGTTGTGTGGACCATAGTATTTATAGAATATAAGAAGCTAGTAAGGCAAAGAAAAATAAATAGGTTGTATATAAGAATAAGAGAAAGAGCAGAAGACAGTGGCAATGAGAGTGAGGGGGATGCAGAGGAATTGGCAGCACTTGGGAAAATGGGGCCTTTTATTCCTGGGGATGTTAATAATCTGTAAAGCTGCGGATGACTTGTGGGTCACAATCTATTATGGGGTACCTGTGTGGAAAGAAGCAAACACCACTTTATTCTGTGCATCAGATGCTAAATCATATGAAAAAGAAGTACATAATGTCTGGGCTACACATGCCTGTGTACCCACAGACCCCAATCCACAAGAAGTAGCTCTAAATGTGACAGAAAATTTTAATATGTGGGAAAATGACATGGTAGAACAAATGCATAAAGATATAATCAGTTTATGGGATCAAAGTCTAAAGCCATGTGTAAAGCTAACCCCACTCTGTGTTACTTTAAACTGTACTGATGTACCCAACAATAGTACTAAGAACAGCAATAGTACTGTACCCAACAATAGTACTGAGAACAGCAATAGTACTCAGAACAACTCCACAGTATATAATAAACTAGAAATGACAAACTGCACTTTCAATATAACCACAGAAGTAAGAGATAAGCAGAAGCAAGAATATGCGCTTTTTTATAGACTTGATATAGAACCAATCAGCAATAATAATAGCAGGGAAGAATATAGGCTAATAACTTGTAATACCTCAACCATTACACAGGCTTGTCCAAAGGTATCTTGGGATCCAATTCCCATACATTATTGTGCTCCAGCTGGTTATGCGATTCTAAAGTGTAAGGATAAAAGGTTCAATGGGACGGGGCCATGTAGGAATGTCAGCACAGTACAATGTACACATGGAATTAGGCCAGTGGTATCAACTCAATTGTTGTTAAATGGCAGCCTATCAGAAGGAGGTATAATAATCAGATCTCAAAATCTCTCAGATAATGCAAAAACTATAATAGTACACCTTAATGAATCTGTACAGATCAATTGTACAAGACCCAACAACAATACAAGAAAAAGTATACGTATAGGACCAGGACAATCATTTTATGCAACAGGAGAAATAATAGGAGACATAAGAAAGGCACATTGTAACATTAGTGGAGAACAATGGAATAAAACTTTAGACCGAGTAAAGGCAGAGTTAAAGCTTCATTTTAATAAAACAATACAATTTAACTCATCCTCAGGAGGGGACCTAGAAATTACAATGCATAGTTTTAATTGTAGAGGAGAATTTTTCTACTGCAATACATCACTACTGTTTAATAATACAGTACCTAATAATGGCACTATCACTCTCCCATGTCGAATAAAACAATTTGTAAACATGTGGCAGGAAGTAGGACGAGCAATGTATGCCGCTCCCATTGCAGGAAACATTACCTGTAACTCAAATATTACAGGTCTGCTATTGACAAGAGATGGTGGTCAGAGTAATAATAGTGATTCTGAGACCTTCAGACCTGGGGGAGGAGATATGAAAGACAATTGGAGAAGTGAACTATATAAATATAAAGTAGTAGAAATTGAACCACTAGGAGTAGCACCCACCAGGCCCAAAAGACCAGTGGTGAGGAGAGAAAGAAGAGCAGTGGCAATAGGAGCTGTATTCCTTGGGTTCTTGAGCGCAGCAGGAAGCACTATGGGCGCGGCGTCACTAACGCTGACGGTACAGGCCAGACAATTATTGTCTGGAATAGTGCAACAGCAGAACAATCTGCTGCAGGCTATTGAAGCGCAACAGCATATGTTGCAGCTCACAGTCTGGGGCATTAAACAGCTCCAGGCAAGAGTCCTGGCTGTGGAAAGATACCTAAAGGATCAACAGCTCCTAGGGCTTTGGGGATGCTCTGGAAAACTCATCTGCACCACTAATGTGCCCTGGAACTCTAGTTGGAGTAATAAATCTCAGGATGAGATTTGGAATAACATGACCTGGATGCAGTGGGAAAAAGAGATTAGCAATTACTCAAAAACAATATACATGTTAATTGAAAAATCGCAGAGCCAGCAGGAACGGAATGAACAAGAATTGTTGGAATTGGACAAGTGGGATAGTCTGTGGAGTTGGTTTGATATAACAAACTGGTTATGGTATATAAAAATATTCATAATGATAGTAGGAGGCTTGATAGGCTTAAGAATAGTTTTTGCTGTGCTTTCTATAGTAAATAGAGTTAGGAAGGGATACTCACCTTTGTCATTACAGACCCTTATCCCAGCCCCGACGGAACCCGACAGGCCCGAAGGAATCGAAGAAGGAGGTGGAGAGCAAGGCAAAGACAGATCCGTGCGATTAGTGAACGGATTCTTAGCTCTTGTCTGGGACGACTTGAGGAACCTGTGCCTCTTCAGCTACCGCCACTTGAGAGACTTCATATTAATTGCAGCGAGGATTGTGGACAGGGGACTGAGGAGGGGGTGGGAAGCCCTCAAATATCTGGGGAACATCATACAGTATTGGAGTCAGGAACTAAAGAATAGTGCTATTAGCTTGTTTAATACCACAGCAATAGTAGTAGCTGAGGGGACAGATAGAGTTATAGAAGCTTTGCAAAGAGCTGTTAGAGCTGTTCTCAACATACCTAGAAGAATAAGACAGAGAGTAGAAAGGGCTTTGATATAAAATGGGTGGCAAGTGGTCAAAAAGTAGTATAGTTGGATGGCCTGCTATAAGGGAAAGAATGAGACGACCCCCTCCAGCAGCAGCAGAAGGGGTGGGAGCAGTGTCTCAAGACTTAGAAAGACGGGGGGCAATTACAAGCAGCAATACTGGAGCTACTAATCCTGACTTGGCCTGGCTGGAAGCACAAGAGGACGAGGAAGTAGGCTTTCCAGTCAGACCCCAGGTACCTTTAAGACCAATGACTTATAAGGGAGCTTTTGATCTCAGTCAGTTTCNANAAGAAAAGGGGGGACTGGAAGGGTTAWTTTACTCCAAGAAAAGACAAGAGATCCTTGATCTGTGGCTTTACCACACACAAGGCTACTTCCCCTGATTGGCAGAACTACACACCAGGGCCGGGGGGTCAGATATCCCCTGACCTTTGGGTGGTGCTTCAAGCTAGTACCAGTTGAGCCAGAGGAGGTAGAAAAGGCCAATGAAGGAGAGAACAACTGCTTGCTACACCCCATGAGCCAACATGGAATGGAGGATGAAGACAGAGAAGTACTGAAATGGAAGTTTGACAGCCGCCTGGCACTGAAACACATAGCCAGAGAGAGACATCCGGAGTTCTACCGAGACTGAGATTGCTGACACAGAGATTGCTGACACAGAAGAATCTAAGGGACTTTCCACTGGGGACTTTCCAGAGGGCGGTCCAGAGGGCGGGACTGGGGAGTGGCTCACCCTCAGATGCTGCATATAAGCAGCCGCTTTTCGCTTGTACAGGGTCTCTCTGGTTAGACCAGATTTGAGCCTGGGAGCTCTCTGGCTAGCTGAGAACCCGCTGCTTAA
>F1.BR.93.93BR020_1_AF005494_H.BE.93.VI997_AF190128
CTGAAAGCGAAAGTAAACCAGAGAAGAACTCTCGACGCAGGACTCGGCTTGCTGAAGTGCACACGGCAAGAGGCGAGAGCGGCGACTGGTGAGTACGCCAAAATTTGACTAGCAGAGGCTAGAAGGAGAGAGATGGGTGCGAGAGCGTCAGTATTAAGCGGGGGAAAATTAGATGCTTGGGAAAAAATTCGGTTAAGGCCGGGGGGAAAGAAAAAATATAGACTAAAACATCTAGTATGGGCAAGCAGGGAGCTAGAACGATTTGCACTTGATCCAGGCCTTCTAGAAACATCAGAAGGCTGTCGAAAAATAATAGGACAGTTACAACCATCCCTTCAGACAGGATCAGAAGAGCTCAAATCATTATATAATACAATAGCAGTCCTCTATTATGTACATCAAAAGGTAGAGGTAAAAGACACCAAGGAGGCTTTAGAGAAGCTAGAGGAAGAACAAAACAAAGGTCGGCAAAAGACACAGCAAGCGACTGCTGAAAAAGGGGTCAGTCAAAATTACCCTATAGTACAGAATCTTCAGGGACAAATGGTACACCAGTCTTTATCACCTAGAACTTTAAATGCATGGGTAAAGGTGATAGAAGAGAAGGCTTTTAGTCCAGAAGTAATACCCATGTTTTCAGCATTATCAGAAGGGGCCACTCCACAAGATTTAAACACCATGTTAAATACAGTGGGGGGACATCAAGCAGCCATGCAAATGTTAAAAGACACCATCAATGAGGAGGCTGCAGAATGGGACAGATTACATCCAACACAGGCAGGACCCATCCCCCCAGGTCAGATAAGGGAACCTAGGGGAAGTGATATAGCTGGAACTACTAGTACCCTTCAGGAACAAATACAATGGATGACAGGCAACCCACCTGTCCCAGTGGGAGAAATGTATAAAAGATGGATCATCCTAGGATTAAATAAAATAGTAAGAATGTATAGCCCTGTCGGCATTTTGGACATAAGACAAGGGCCAAAAGAACCCTTTAGAGACTATGTAGACAGGTTCTTTAAAACCCTAAGAGCTGAGCAAGCTACACAGGAAGTAAAGGGTTGGATGACAGACACCTTGTTGGTCCAAAATGCGAACCCAGATTGTAAGACCATTTTAAAAGCATTGGGACCAGGGGCTACACTAGAGGAAATGATGACAGCATGTCAGGGAGTGGGAGGACCTAGCCATAAGGCAAGAGTTTTGGCTGAGGCAATGAGCCAAGCAACAAATACAGCTATAATGATGCAGAAAAGTAACTTTAAGGGCCAAAGAAGAATTGTTAAATGCTTTAATTGTGGCAAAGAAGGACACATAGCCAAAAATTGCAGGGCCCCTAGAAAAAAGGGCTGTTGGAAGTGTGGAAGAGAGGGACACCAAATGAAGGACTGCACTGAGAGACAGGCTAATTTTTTAGGGAAAATTTGGCCTTCCAACAAGGGGAGGCCCGGAAACTTCATCCAGAACAGGCCAGAGCCGTCAGCCCCGCCAGCAGAGAGCTTCAGGTTCGGGGAGGAGACAACCCCATCTCCGAAGCAGGAGCAGAAAGACGAGGGACTGTACCCTCCCTTAGCTTCCCTCAAATCACTCTTTGGCAACGACCCCTAGTCACAATAAGAGTAGGGGGACAGCTAAAGGAAGCTCTATTAGATACAGGAGCAGATGATACAGTATTAGAAGACGTAAATTTGCCAGGAAAATGGAAACCAAAAATGATAGGGGGAATTGGAGGTTTTATCAAAGTAAAACAGTATGATAGCATACTCATAGAAATTTGTGGACACAGAGCTATAGGTACAGTGTTAGTAGGACCTACGCCTGTCAACATAATTGGAAGAAATATGTTGACCCAGATTGGTTGTACTTTACATTTTCCAATTAGTCCTATTGAGACTGTACCAGTAAAATTGAAGCCAGGAATGGATGGCCCAAAGGTTAAACAATGGCCATTGACAGAAGAAAAAATAAAAGCATTAACAGAAATATGTATGGAAATGGAAAAGGAAGGAAAAATTTCAAAAATTGGGCCTGAAAATCCATACAATACTCCAGTATTTGCCATAAAGAAAAAAGACAGTACTAAATGGAGGAAATTAGTAGATTTCAGAGAACTTAATAAAAGAACTCAAGATTTTTGGGAGGTTCAATTAGGAATACCGCATCCAGCAGGGTTAAAAAAGAAAAAGTCAGTAACAGTACTGGATGTGGGGGATGCATATTTTTCAGTTCCCTTAGATAAGGATTTCAGGAAGTACACTGCATCCACCATACCTAGTACCAACAATGAGACACCAGGAGTTAGGTACCAGTACAATGTGCTTCCACAAGGATGGAAAGGATCACCAGCAATATTCCAATATAGCATGACAAAAATCTTAGATCCCTTTAGAGCAAAAAATCCAGACATAGTTATCTACCAATACATGGATGATTTGTATGTAGGGTCTGACTTAGAAATAGGACAGCATAGAACAAAAATAGAAGAGTTAAGAGAACATCTACTGAAATGGGGATTAACTACACCAGACAAAAAACATCAAAAAGAACCCCCATTCCTTTGGATGGGGTATGAACTCCATCCTGATAAATGGACAGTGCAGCCTATACAATTGCCAGACAAGGACAGCTGGACTGTCAATGATATACAGAAGTTAGTAGGAAAACTAAATTGGGCAAGTCAGATTTATCCAGGGATTAAAGTAAAACAATTATGTAAACTCCTTAGGGGAGCCAAGGCACTAACAGACATAGTGCCACTGACTACAGAAGCAGAGTTAGAATTGGCAGAGAATAGGGAGATTCTAAAAGAACCAGTACATGGGGCATATTATGACCCGTCAAAAGACTTAATAGCAGAAATACAGAAACAAGGGCAAGGGCAATGGACATATCAAATTTATCAAGAGCCATTTAAAAATCTAAAAACAGGAAAGTATGCAAAAATGAGGTCTGCCCACACTAATGATGTAAAACAGTTAACAGAAGCAGTGCAAAAGATATCTCTAGAAAGCATAGTAATATGGGGCAAGACTCCTAAGTTTAGACTACCCATATTAAAAGAGACATGGGATACATGGTGGACAGAGTACTGGCAAGCCACCTGGATTCCTGAGTGGGAGTTTGTCAATACCCCCCCTCTAGTAAAACTATGGTATCAGTTAGAAACAGAGCCCATAGTAGGAGCAGAAACCTTCTATGTAGATGGGGCATCTAATAGAGAGACCAAAAAAGGAAAAGCAGGATATGTTACTGACAGAGGAAGACAAAAAGCGGTCTCCCTAACTGAGACTACAAATCAGAAGGCTGAGTTACAAGCAATTCAGTTAGCTTTACAGGATTCAGGATCAGAAGTAAACATAGTAACAGACTCACAGTATGCATTAGGAATCATTCAAGCACAACCAGATAAGAGTGAATCAGAGTTAGTCAATCAAATAATAGAGCAATTAATAAAAAAGGAAAAGGTCTACCTGTCATGGGTACCAGCACACAAAGGGATTGGAGGAAATGAACAAGTAGATAAATTAGTCAGTGCTGGAATCAGGAAAGTACTGTTTCTAGATGGGATAGATAAGGCACAAGAGGAACATGAAAAATATCACAACAATTGGAGAGCAATGGCTAGTGATTTTAATATACCAGCTGTAGTAGCAAAAGAAATAGTAGCTAGCTGTGATAAATGTCAGCTAAAAGGGGAAGCCATGCATGGACAAGTAGATTGTAGCCCAGGGATATGGCAATTAGATTGCACACATTTAGAAGGAAAAATTATCCTGGTAGCAGTCCATGTAGCTAGTGGGTACCTAGAAGCAGAAGTTATCCCAGCAGAAACAGGACAAGAGACAGCCTACTTCCTACTAAAGTTAGCAGGAAGATGGCCAGTAAAAACAATACATACAGACAATGGCACCAATTTCACCAGTGCCACGGTTAAGGCAGCTTGTTGGTGGGCAGGTATCCAGCAGGAATTTGGAATTCCTTACAACCCCCAAAGTCAAGGAGTAGTAGAATCTATGAATAAAGAGCTAAAGAAAATCATAGGACAGATAAGAGATCAAGCTGAACATCTTAAGACAGCAGTCCAAATGGCAGTATTCATTCACAATTTTAAAAGAAAAGGGGGGATTGGGGGATACAGTGCAGGGGAAAGAACAATAGACATAATAGCAACAGACATACAAACTAGAGAATTACAAAAACAAATTATAAAAATTCAAAATTTCCGGGTTTATTACAGGGACAGCAGAGACCCAGTTTGGAAAGGACCAGCAAAGCTACTCTGGAAAGGTGAAGGGGCAGTAGTCATACAAGACAATAGTGAAATAAAGGTAGTTCCAAGAAGAAAAGCAAAGATCATTAGGGATTATGGAAAACAGATGGCAGGTGATGATTGTGTGGCAGGTAGACAGGATGAGGATTAACACATGGAAAAGTTTAGTAAAATACCATATGCATATTTCAAAGAAAGCCAAAGGATGGTTTTATAGACATCACTTTGAAAGCAGGCATCCAAAAATAAGTTCAGAAGTACACATCCCACTAGAGACAGCTGAATTAGTAATAACAACATACTGGGGGCTGCTTCCAGGAGAAAGAGAATGGCATCTGGGTCAGGGAGTCTCCATAGAATGGAGGCAGGGGAGGTATAGAACACAAATAGACCCTGGCCTGGCAGACCAACTGATCCATATATATTATTTTGATTGTTTTTCAGAATCTGCCATAAGGAAAGCCATATTAGGACATAAAATTAGCCCTAGGTGTAACTATCAAGCAGGACATAACAAGGTAGGATCTCTACAATACTTGGCACTAACAGCATTAATAGCTCCAAAAAAGACAAAGCCGCCTTTGCCTAGTGTCCAGAAACTAGTAGAAGACAGATGGAACAAGCCCCAGAAGACCAGGGGCCACAGAGAGAGCCATACAATGAATGGACACTAGATCTTTTAGAGGAGCTTAAGAATGAAGCTGTTAGACATTTTCCTAGGCCATGGCTCCATAGCTTAGGACAACATATCTATAACACCTATGGGGATACTTGGGAAGGAGTTGAAGCAATCATAAGGATATTGCAACAACTACTGTTTATCCATTTCAGAATTGGGTGCCGTCATAGCAGAATAGGCATTACTCGACAGAGAAGAGTAAGAAATGGAACTAGTAGATCCTAACTTAGATCCCTGGAACCATCCAGGAAGCCAGCCTACAACTCCTTGTACCAGATGTTATTGTAAATGGTGTTGCTTTCATTGTTACTGGTGCTTTACAACGAAGGGCTTAGGCATCTCCTATGGCAGGAAGAAGCGGAGACAGCGACCAAGAACTCCTCAAAGCAGTCAGATACATCAAGATTTTGTACCAAAGCAGTAAGTATTGTTAAGCATATGTAATGTCAAATTTGTTAGCAATAGGCATAGCAGCATTAATAGTAGCACTAATAATAACAATAGTTGTGTGGACTATAGCATATATAGAATATAAGAAACTGGTAAGGCAAAGAAAAATAAATAGGTTATATAAAAGAATAAGCGAAAGAGCAGAAGACAGTGGCAATGAGAGTGAGGGGGATGCAGAGGAATTGGCAGCACTTGGGGAAGTGGGGCCTTTTATTCCTGGGGACATTAATAATCTGTAATGCTGCAGAAAACTTATGGGTTACAGTCTATTATGGGGTACCTGTGTGGAAAGAAGCAACCACTACTCTATTCTGTGCATCAGATGCTAAATCATATGAAAAAGAGGCACATAATGTCTGGGCTACACATGCTTGTGTACCCACAGATCCCAATCCACAAGAAGTAGTTCTGGAAAATGTAACAGAAAGGTTTAATATGTGGGAAAATAACATGGTAGAACAAATGCATACAGATATAATCAGTTTATGGGATCAAAGCCTAAAGCCATGTGTGAAGTTAACCCCACTCTGTGTTACTTTAGATTGTAGAAACATTGCCACCAATGGCACCAATGACACTATTGCCATCAATGACACTCTGAAGGAAGATCCAGAGGCAATACAAAACTGTTCTTTCAATACAACCACAGAAATAAGAGATAAGCAGCTGAAAGTACATGCACTTTTTTATAAACTTGATATAGTACAAATCAACAAGGATGACAATAGAACATACAGACTAATAAATTGTGATGCCTCAACCATTACACAGGCTTGTCCAAAGGTATCTTGGGATCCAATTCCCATACATTATTGTGCTCCAGCTGGTTATGCGATTCTAAAGTGTAATGAGAAAAATTTCACAGGGACAGGGTCATGCAAGAATGTCAGTACAGTACAATGTACACATGGAATTAAACCAGTGGTATCCACTCAATTGTTGTTAAATGGCAGCCTAGCAGAAGGAGAGATAGTAATCAGATCTCAAAATATCTCAGATAATGCAAAAACCATAATAGTGCACCTTAATGAATCTGTACAGATTAATTGTACAAGACCCAACAACAATACAAGAAAAAGAATATCTTTAGGACCAGGACGAGTATTTTATACAACAGGAGAAATAATAGGAGACATCAGAAAGGCACATTGTAACGTTAGTGGAACACAATGGAGGAACACGTTAGCAAAGGTAAAGGCAAAGTTAGGGTCTTATTTCCCTAATGCAACAATAAAATTTAACTCATCCTCAGGAGGGGACCTAGAAATTACAAGGCATAATTTTAATTGTATGGGAGAATTTTTCTACTGTAATACAGATGAACTGTTTAATGACACAAAATTCAATGACACAGGATTCAATGGCACTATCACTCTCCCATGTCGAATAAAACAAATTGTAAACATGTGGCAGGAAGTGGGACGAGCAATGTATGCCAATCCCATTGCAGGAAACATTACCTGTAACTCAAATATTACAGGTCTGCTATTGACAAGAGATGGTGGTCTGAATAGTACTAATGAGACCTTCAGACCTGGGGGAGGAGATATGAGGGACAATTGGAGAAGTGAATTATATAAATATAAAGTAGTAAAAATTGAACCACTGGGAGTAGCACCCACCGAGGCAAGGAGAAGAGTGGTGGAGAGAGAAAAAAGAGCTGTGGGAATGGGAGCTTTTTTCCTTGGGTTCTTGGGAGCAGCTGGAAGCACTATGGGCGCAGCGTCAATAACGCTGACGGTACAGGCCAGACAATTATTGTCTGGAATAGTGCAACAGCAGAGCAATCTGCTGAGGGCTATTGAAGCGCAACAGCATCTGTTGCAGCTCACAGTCTGGGGCATTAAACAGCTCCAGGCAAGAGTCCTGGCTGTGGAAAGATACCTAAAGGATCAACAGCTCCTAGGGCTTTGGGGCTGCTCTGGAAAACTCATCTGCACCACTAATGTGCCCTGGAACTCTAGTTGGAGTAATAAATCTCTTGAGGAGATTTGGGGGAACATGACCTGGATGGAGTGGGAAAAAGAGGTTAGCAATTACTCAAAAGAAATATACAGGTTAATTGAAGACTCGCAGAACCAGCAGGAAAAGAATGAACAAGAATTATTAGCATTGGACAAATGGGCAAGTCTGTGGAATTGGTTTGACATAACACAGTGGCTGTGGTATATAAAAATATTCATAATGATAGTAGGAGGCTTGATAGGCTTAAGAATAGTTTTTACTGTGCTTTCTATAGTAAATAGAGTTAGGAAGGGATACTCACCTTTGTCATTTCAGACCCATATCCCAAGCCCGAGGGAACCCGACAGGCCCGAAGGAATCGAAGAAGGAGGTGGAGAGCAAGGCAAAGACAGATCCGTGAGATTAGTGACCGGATTCTTAGCTCTTGCCTGGGACGACCTGCGGAACCTGTGCCTCTTCAGCTACCGCCACTTGAGAGACTTCATATTAATTGCAGCGAGGATTGTGGACAGGGGGCTGAAGAGGGGGTGGGAAGCTCTCAAATATCTGGGGAATCTCACACAGTATTGGGGTCAGGAACTAAAGAATAGTGCTATTAGCTTGCTTAATGCCACAGCAATAGCAGTAGCTGAGTGGACAGATAGAGTTATAGAAGCTTTGCAAAGAGCTGGTAGAGCTATTCTCAACATACCTAGAAGAATAAGACAGGGCTTGGAAAGGGCTTTGCTATAAAATGGGTGGCAAGTGGTCAAAAAGTAGTATAGTTGGATGGCCTGCTATAAGGGAAAGAATGAGGCGAACCCCTCCAACCCCTCCAGCAGCAGAGGGGGTGGGAGCAGTGTCTCAAGACTTAGAAAGACGGGGGGCAATTACAAGCAGCAATACTAGAGCTAATAATCCTGACTTGGCCTGGCTGGAAGCACAAGAGGAAGACGAAGTAGGCTTTCCAGTCAGACCTCAGGTACCTTTAAGACCAATGACCTATAAGGGAGCTGTAGATCTCAGTCACTTTTTAAAAGAAAAGGGGGGACTGGAAGGGTTAATTTACTCCAAGAGAAGACAAGAGATCCTTGATCTGTGGGTCTACCACACACAAGGCTACTTCCCTGATTGGCAGAACTACACACCAGGGCCAGGGATCAGATATCCACTGACCATGGGGTGGTGCTTCAAGCTAGTACCAGTTGACCCAGAGGAGGTAGAAAAGGCCAATGAAGGAGAGAACAACTGCTTGCTACACCCCATGAGCCAACATGGAATGGAGGATGAAGACAAAGAAGTACTGAAATGGGAGTTTGACAGCCGCTTGGCACTGAGACACATAGCCAGAGAGAGACATCCGGAGTACTACCAAGACTGAGACTGCTGACACAGAGATTGCTGACACAGAAGAATCTAAAGGGACTTTCCACTGGGGACTTTCCAGAGGGTGGGCCAGAGGGCGGGACTGGGGAGTGGCTCACCCTCAGATGCTGCATATAAGCAGCCGCTTTTCGCCTGTACTGGGTCTCTCTAGTTAGACCAGATTTGAGCCCGGGAGCTCTCTGGCTAGCTAGGGAACCCACTGCTTAAGCCTCAATAAAGCTTGCCTTGAGTGCTTT
>F1.BE.93.VI850_AF077336_J.SE.94.SE7022_AF082395
GGACTTGAAGCGAAAGTAGAACCAGAGAAGATCTCTCGACGCGGGGACTCGGCTTGCTGAAGTGCAACACGGCAAGAGGCGAGAGCGGCGACTGGTGAGTACGCCGAATTTTTTTTTTGACTAGCGGAGGCTAGAAGGAGAGAGATGGGTGCGAGAGCGTCAATATTAAGCGGGGGAAAATTAGATGAATGGGAAAAAATTCAGTTAAGGCCGGGGGGAAAGAAAAGATATAAAATGAAACATCTAATATGGGCAAGCAGGGAGCTAGAACGATTTGCACTTGATCCTGGCCTTCTAGAAACATCAGAAGGCTGTCAAAAAATAATAAGACAGCTACAACCATCCCTTCAGACAGGATCAGAAGAGCTTAAGTCATTATTTAATACAGTAGCAGTCCTCTATTATGTACATCAAAGGGCAGGGGTAACAGACACCAAGGAAGCTTTAGACAAGCTAGAGGAAGAACAAAACAAAAGTCAGCAAAAGACACAGCAAGCGGCAGCTGACAAAGGGGTCAGTCAAAATTACCCTATAGTACAGAATCTTCAGGGACAAATGGTACACCAGTCTCTATCACCTAGAACTTTAAATGCATGGGTAAAGGTGATAGAAGAGAAGGCTTTTAGCCCAGAAGTAATACCCATGTTTTCAGCATTATCAGAAGGGGCCACTCCCACAGATTTAAACACCATGCTAAATACAGTGGGGGGACATCAAGCAGCCATGCAAATGTTAAAAGACACCATCAATGAGGAAGCTGCAGAATGGGACAGATTACATCCAGTGCATGCAGGGCCTGCCCCACCAGGCCAGATGAGGGAACCTAGGGGGAGTGATATAGCTGGAACTACTAGTACCCTTCAGGAACAAATACAATGGATGACGGGCAACCCACCTGTCCCAGTGGGAGACATCTATAAAAGATGGATCATCCTAGGATTAAATAAAATAGTAAGAATGTATAGTCCTGTCAGCATTTTGGACATAAAACAAGGGCCAAAAGAACCCTTTAGAGACTATGTAGACAGATTCTTTAAAGTCCTAAGAGCTGAGCAAGCTTCACAGGACGTAAAGGGTTGGATGACAGACACATTGTTGGTCCAAAATGCGAACCCAGATTGTAAGACCATTTTAAAAGCATTGGGAACAGGGGCTACACTAGAAGAAATGATGACAGCATGTCAGGGAGTGGGAGGACCTAGCCATAAGGCAAGAGTTTTGGCCGAGGCAATGAGTCAAGCAAATTCAGCCATAATGATGCAGAAAAGTAATTTTAAGGGCCAAAGAAGAGTTGTTAAATGTTTTAATTGTGGCAAAGAAGGACACATAGCCAGAAATTGCAGGGCCCCTAGAAAAAAGGGCTGTTGGAAATGTGGAAGAGAAGGACACCAAATGAAAGACTGCACTGAAAGACAGGCTAATTTTTTAGGGAAAATTTGGCCTTCCAACAAGGGGAGGCCCGGAAATTTCCTTCAGAGCAGACCAGAGCCAACAGCCCCACCAGCAGAGAGCTTCGGGTTCAGAGAGGAGATAACCCCCTCTCCGAAGCAGGAGCAGAAAGACGGGGAACTGTACCCTCCCTTAGCTTCCCTCAAATCACTCTTTGGCAACGACCCTTAGTCACAATAAAAATAGGGGGACAGATAAAGGAGGCTCTATTAGATACAGGAGCAGATGATACAGTATTAGAAGACATAAATTTGCCAGGAAAATGGAAACCAAAAATGATAGGGGGAATTGGAGGTTTTATCAAAGTAAAACAGTATGATAACATACTCATAGAAATTTGTGGACACAAGGCTATAGGTACAGTGTTAGTAGGACCTACGCCTGTCAACATAATTGGAAGAAATATGTTGACTCAGCTTGGTTGTACTTTAAATTTTCCAATTAGTCCTATTGAAACTGTACCAGTAAAATTAAAGCCAGGAATGGATGGCCCAAAAATTAAACAATGGCCATTGACAGAAGAAAAAATAAAAGCATTAACACAAATTTGTGCAGAACTGGAAGAGGAGGGAAAAATTTCAAGAATTGGGCCTGAAAATCCATATAATACTCCAGTATTTGCCATAAAGAAAAAAGACAGTAGTAAATGGAGGAAATTAGTAGATTTCAAAGAACTTAATAAAAGAACTCAAGATTTCTGGGAGGTTCAATTAGGAATACCACATCCTGCAGGGTTAAAAAAGAAAAAGTCAGTAACAGTACTGGATGTGGGGGATGCATATTTTTCAGTTCCCTTAGATAAGGATTTCAAGAAGTACACTGCATTCACCATACCTAGTGTCAACAATGAGACACCTGGAATTAGGTACCAGTACAATGTGCTTCCACAAGGATGGAAAGGATCACCAGCAATATTCCAATGTAGCATGACAAAAATCTTAGAGCCCTTTAGAATGAAAAACCCAGACATAGTCATCTACCAATACATGGATGATTTGTATGTAGGGTCTGACTTAGAAATAGGGCAGCATAGAACAAAAATAGAGGAGTTAAGAGAACATCTACTGAGATGGGGATTTACTACACCAGACAAAAAACATCAGAAAGAACCTCCATTCCTTTGGATGGGGCATGAACTCCATCCTGATAAATGGACAGTGCAGCCTATACAATTGCCAAACAAGGACAGCTGGACTGTCAATGACATACAGAAGTTAGTAGGAAAACTAAATTGGGCAAGTCAGATTTATCCAGGGATTAAAGTAAGGCCATTATGTAAACTCCTTAGGGGAGCCAAGGCACTAACAGACATAGTGCCACTGACTGCAGAGGCAGAGTTAGAATTGGCAAAAAATAGGGAGATTCTAAGAGAACCAGTACATGGGGTATATTATGACCCATCAAAAGACTTAATAGCAGAAATACAGAAACAAGGAGACGGGCAATGGACATATCAAATTTATCAGAACCCATTTAAAAATCTAAAAACAGGAAAGTATGCAAAAGTGAGGTCGGCCCACACTAATGATGTAAAACAATTAACAGAAGCAGTACAAAAGATAGCTTTAGAAAGCATAGTAATATGGGGGAAGAGATCTCCTAAGTTTAAACTACCCATACTGAAAGAGACATGGGATACATGGTGGACAGATTATTGGCAAGCCACCTGGATTCCTGAATGGGAGTTTGTCAATACCCCCCCTCTAGTGAAACTATGGTACCAGTTAGAAACAGAGCCCATAGCAGGAGCAGACACCTTCTATGTAGATGGGGCATCTAATAGAGAGACCAAAAAAGGAAAAGCAGGATATGTTACTGATAAAGGAAAACAAAAAGTTGTCTCCCTAACGGAGACCACAAATCAGAAGGCTGAGTTACAAGCAATTTATTTAGCTTTGCAGGATTCAGGATCAGAAGTGAACATAGTAACAGACTCACAATATGCATTAGGAATCATTCAGGCGCAACCAGATAAGAGTGAATCAGAAATAGTCAATCAAATAATAGAGCAATTAATACAAAAGGAAAGGGTCTACCTGTCATGGGTACCAGCACACAAAGGGATTGGAGGAAATGAACAAGTAGATAAATTAGTCAGTGCTGGAGTCAGGAAAATACTGTTTTTAGATGGGATAGATAAGGCACAAGAAGAACATGAAAAATATCACAACAATTGGAGAGCGATGGCTAGTGATTTTAATCTGCCACCTATAGTAGCAAAAGAAATAGTAGCTAGCTGTGATAAGTGTCAGCTAAAAGGGGAAGCCATGCACGGACAAGTAGACTGTAGTCCAGGGATATGGCAATTAGATTGCACACATTTAGAAGGCAAGGTTATCCTGGTAGCAGTCCATGTAGCTAGTGAGTACATAGAAGCAGAAGTTATTCCAGCAGAAACAGGACAGGAAACAGCCTACTTCATATTAAAGTTAGCAGGAAGATGGCCAGTAAAAATAATACATACAGACAATGGCAGCAATTTCACCAGTGCCGCGGTTAAGGCATCCTGTTGGTGGGCAGGTATCCAACAGGAATTTGGAATCCCCTACAATCCCCAAAGTCAAGGAGTAGTAGAATCTATAAATAAAGAGTTAAAAAAGATCATAGGACAGGTAAGAGATCAAGCTGAACATCTTAAGACAGCAGTACAAATGGCAGTATTCATCCACAATTTTAAAAGAAAAGGGGGGATTGGGGGGTACAGTGCAGGGGAAAGAATAATAGACATAATATCAACAGACATACAAACTAGAGAATTACAAAAACAAATTACGAAAATTCAAAATTTCCGGGTTTATTACAGGGACAGCAGAAACCCAGTTTGGAAAGGACCAGCAAAGCTACTCTGGAAAGGTGAAGGGGCAGTAGTCATACAAGACAATAGTGAAATAAAGATAGTACCAAGGAGGAAAGCAAAGATCATTAGGGATTATGGAAAACAGATGGCAGTTGATGATTGTGTGGCAGGTAGACAGGATGAGGATTAACACATGGAAAAGTTTAGTAAAATATCATATGTATGTTTCAAAGAAAGCCAAAGGATGGTCTTATAGACATCACTTTCAAAGCAGGCATCCAAGAGTAAGTTCAGAAGTACACATCCCACTAGAGGAAGTTAAATTAGTAATAACAACATATTGGGGGCTGCACCCAGGAGAAAGAGAATGGCATCTGGGTCAGGGAGTCTCCATAGAATGGAGGCAGGGGAAGTATAGGACACAAATAGACCCTGGCCTGGCGGACCAACTGATCCATATATATTATTTTGATTGTTTTTCAGAATCTGCCATAAGGAAAGCCATATTAGGACATAGAATTAGCCCTAGGTGTAACTATCAAGCAGGACATAATAAGGTAGGATCCCTACAATATTTGGCACTAACAGCATTAATAGCTCCAGAGAAGACAAAGCCACCGCTGCCTAGTGTCCAGAAACTAGTAGAGGACAGATGGAACAAGCCCCAGGAGACCAGGGGCCACAGAGGGAGCCATACAATGAATGGGCACTAGAAATTTTAGAGGAGCTTAAGAATGAAGCTGTTAGGCATTTTCCTAGGCCATGGCTTCACGGCTTAGGCCAACATATCTATAACACCTATGGGGACACTTGGGAGGGAGTTGAAGCTATAATAAGGATATTGCAACAACTACTGTTTATCCATTTCAGAATTGGGTGCCGTCATAGCAGAATAGGCATTGTTCCACAGAGAAGAGTAAGAAATGGAGCCAGTAGATCCTAGCTTAGATCCCTGGAATCATCCAGGAAGCCAGCCTACAACTCCTTGTACCAAATGTTATTGTAAACGATGTTGCTTTCATTGCCAATGGTGCTTTACAACGAAGGGCTTAGGCATCTCCTATGGCAGGAAGAAGCGGAGACAGCGACACAGAACTCCTCAAAGCAGTCAAGTGCATCAAAATTCTCTACCAAAGCAGTAAGTAGTGTTAAATAGTATATGTAATGTCATATTTGTTAGCAATAGGGATAGCAGCATTAATAGTAGCACTAATAATAGCCATAGTTGTGTGGACTATAGTATATATAGAATATAAGAAACTGGTAAGGCAAAGAAAAATAAATAAATTATATAAAAGAATAAGAGAAAGAGCAGAAGACAGTGGCAATGAGAGTGAGGGGGATGCAGAGGAATTGGCAGCACTTGGGGAAATGGGGCCTTTTATTCCTGGGGATATTAATAATCTGTAATGCTGCAGACAACTTGTGGGTCACAGTCTATTATGGGGTACCTGTGTGGAAAGAAGCAACCACTACTCTATTCTGTGCATCAGATGCTAAAGCATATGAAAGAGAGGCACATAACGTTTGGGCCACACATGCCTGTGTACCCACAGACCCCAACCCACAAGAAGTATTTCTGAAAAATGTAACAGAAAATTTTGATATGTGGAAAAATAACATGGTAGAACAAATGCATACAGATATAATCAGTTTATGGGATCAAAGCCTAAAGCCATGTGTAAAGTTAACCCCACTCTGTGTGACTTTAAACTGTACTAATGCCACCAATAACAGTCAGGAAAAGCCAGGGGCAATGCAAAACTGTTCTTTCAATATGACCACAGAAGTAAGAGATAAGAAGCTGAAATTATCTGCGCTTTTTTATAGGCTTGATATAGTACCAATAGGCAATAACAATAGCAGTGAATATAGGCTAATAAATTGTAATACCTCAACCATTACACAGGCTTGTCCAAAGGTATCTTGGGATCCAATCCCTATACATTATTGTGCTCCAGCTGGTTATGCAATTCTAAAATGTAATGATAAAAGATTCAATGGGACAGGGCCATGCAAGAATGTCAGCACAGTACAATGTACACATGGAATTAAACCAGTGGTATCAACTCAATTGTTGTTAAATGGCAGCCTAGCAGAAGAAGGTATAGTAATCAGATCTCAAAATATCTCAAATAATGCAAAAACCATAATAGTACACCTTAATGAATCTGTACAGATTAATTGTACAAGACCCAACAACAATACAAGGAAAGGTATACATTTAGGACCAGGACAAACATTCTATGCAACAGGAGCAATAATAGGAGACATAAGAAAGGCACATTGTAACATTAGTGGAACACAATGGAATAACACTCTGGAGTATGTAAAGGCAGAATTAAAGTCGCATTTCCCTAATAATACAGCAATAAAATTTAACCAATCCTCAGGAGGGGACCTAGAAATTACAATGCATAGTTTTAATTGTAGAGGAGAATTTTTCTACTGCGATACATCAGGACTGTTTAATGACACAGGCTCCAATAATGGCACTATCACTCTCCCATGTCGGATAAAACAAATTGTAAACATGTGGCAGGGAGTAGGACGAGCAATGTATACCTCTCCCATTGCAGGAAACATTACCTGTAACTCAAATATTACAGGTTTACTATTGACAAGAGATGGTGGTAATGAGAGTAACATTGAGACCTTCAGACCTGAGGGAGGAAATATGAAAGACAATTGGAGAAGTGAACTATATAAGTATAAAGTAGTAGAAATTGAACCATTAGGAGTAGCACCCACCAAGGCAAAAAGACAAGTGGTGCAGAGAGAAAAAAGAGCAGCGGGACTAGGAGCTTTGTTCCTTGGGTTTCTTGGGGACAGCAGGGAGCATATGGGCGCGGCGTCGATAACGCTGACGGTACAGGCCAGACAATTATTGTCTGGAATAGTGCAACAGCAAAACAATTTGCTGAGGGCTATTGAAGCGCAACAGCATCTGTTGCAGCTCACAGTCTGGGGCATTAAACAGCTCCAGGCAAGAGTCCTGGCTGTGGAAAGATACCTAAAGGATCAACAGCTCCTAGGGATCTGGGGCTGCTCTGGAAAACTCATCTGCACCACTAATGTGCCCTGGAACTCTAGTTGGAGTAATAAATCTCAGGAAGAGATTTGGAATAACATGACCTGGATGGAGTGGGAAAAGGAGATTAGCAATTACTCAAACATAATATACAAATTGATTGAAGAGTCACAAAACCAGCAGGAAAAGAATGAACAAGAATTATTGGCATTAGACAAATGGGCAAGTCTGTGGAATTGGTTTGACATATCAAACTGGCTGTGGTATATAAAAATATTCATAATGATAGTGGGAGGCTTGATAGGCTTAAGAATAGTTTTTGCTGTACTTTCTATAGTAAATAGAGTTAGGAAGGGATACTCACCTTTGTCATTACAGACCCTTATCCCAAGCCCGAGGGGACCCGACAGGCCCGAAGGAATCGAAGAAGGAGGTGGAGAGCAAGGCAAAGACAGATCCGTGCGCTTAGTGACCGGATTCTTAGCTCTTGCCTGGGACGATCTGAGGAACCTGTGCCTCTTCAGCTACCGCCACTTGAGAGACTTCATATTAATTGCAGCGAGGATTGTGGACAGGGGCCTGAGGAGGGGGTGGGAAGCTCTCAAATATCTGGGGAATCTCACGCGGTATTGGAGTCAGGAACTAAAGAATAGTGCTATCAGCCTGTTTAATACCACAGCAATAGTAGTAGCTGAAGGGACAGATAGAATTATAGAAGTTTTGCAAAGAGCTGGTAGAGCTGTTCTCAACATACCTAGAAGAATAAGACAGGGCGCAGAAAGGGCTTTGCTGTAAAATGGGGGGCAAGTGGTCAAAAAGCAGTATAGTTGGATGGCCTGCTGTAGGGGAAAGAATGAGACAAACCCCTACAGCAGCAGAAGGGGTGGGAGCAGTGTCTCGAGACTTAGACAGACGGGGAGCAATTACAAGCAGCAATACTAGAACTACTAATCCTGACTTGGCCTGGCTGGAAGCACAAGAGGAGGAGGAAGTAGGCTTTCCAGTCAGACCTCAGGTACCTGTAAGACCAATGACCTATAAGGCAGCTGTAGATCTCAGTCACTTTTTAAAAGAAAAGGGGGGACTGGAAGGGTTAATTTACTCCAAGAAAAGAGGAGATACCCTTGATCTGTGGGTTTACCACACACAAGGCTACTTCCCTGATTGGCAGAACTACACACCAGGGCCAGGGATCAGATATCCACTGACCTTGGGATGGTGCTTCAAGCTAGTACCAGTTGATCCAGAAGAGGTGGAAAAGGCCAATGAAGGAGAGAACAACTGCTTGTTACACCCCATGAGCCAACATGGAATGGAGGATGAAGACAGAGAAGTACTGAGGTGGAAGTTTGACAGCAGCCTGGCACTGAGACACATAGCCAGAGAGAGACATCCGGAGTTCTACCAAGACTGAGACTGCTGACACAGAGATTGCTGACACAGAAGAATCTAAAAGGGACTTTCCACTGGGGACTTTCCAGAGGGCGGTCCAGAGGGCGGGACTGGGGAGTGGCTCACCCTCAGATGCTGCATATAAGCAGCCGCTTTTCGCCTGTACTGGGTCTCTCTAGTTAGACCAGATTTGAGCCTGGGGGCTCTCTGGCTAGCTGGGGAACCCACTGCTTA
>F1.BE.93.VI850_AF077336_K.CM.96.MP535_AJ249239
GGACTTGAAGCGAAAGTAGAACCAGAGAAGATCTCTCGACGCGGGGACTCGGCTTGCTGAAGTGCAACACGGCAAGAGGCGAGAGCGGCGACTGGTGAGTACGCCGAATTTTTTTTTTGACTAGCGGAGGCTAGAAGGAGAGAGATGGGTGCGAGAGCGTCAATATTAAGCGGGGGAAAATTAGATGAATGGGAAAAAATTCAGTTAAGGCCGGGGGGAAAGAAAAGATATAAAATGAAACATCTAATATGGGCAAGCAGGGAGCTAGAACGATTTGCACTTGATCCTGGCCTTCTAGAAACATCAGAAGGCTGTCAAAAAATAATAAGACAGCTACAACCATCCCTTCAGACAGGATCAGAAGAGCTTAAGTCATTATTTAATACAGTAGCAGTCCTCTATTATGTACATCAAAGGGCAGGGGTAACAGACACCAAGGAAGCTTTAGACAAGCTAGAGGAAGAACAAAACAAAAGTCAGCAAAAGACACAGCAAGCGGCAGCTGACAAAGGGGTCAGTCAAAATTACCCTATAGTACAGAATCTTCAGGGACAAATGGTACACCAGTCTCTATCACCTAGAACTTTAAATGCATGGGTAAAGGTGATAGAAGAGAAGGCTTTTAGCCCAGAAGTAATACCCATGTTTTCAGCATTATCAGAAGGGGCCACTCCCACAGATTTAAACACCATGCTAAATACAGTGGGGGGACATCAAGCAGCCATGCAAATGTTAAAAGACACCATCAATGAGGAAGCTGCAGAATGGGACAGATTACATCCAGTGCATGCAGGGCCTGCCCCACCAGGCCAGATGAGGGAACCTAGGGGGAGTGATATAGCTGGAACTACTAGTACCCTTCAGGAACAAATACAATGGATGACGGGCAACCCACCTGTCCCAGTGGGAGACATCTATAAAAGATGGATCATCCTAGGATTAAATAAAATAGTAAGAATGTATAGTCCTGTCAGCATTTTGGACATAAAACAAGGGCCAAAAGAACCCTTTAGAGACTATGTAGACAGATTCTTTAAAGTCCTAAGAGCTGAGCAAGCTTCACAGGACGTAAAGGGTTGGATGACAGACACATTGTTGGTCCAAAATGCGAACCCAGATTGTAAGACCATTTTAAAAGCATTGGGAACAGGGGCTACACTAGAAGAAATGATGACAGCATGTCAGGGAGTGGGAGGACCTAGCCATAAGGCAAGAGTTTTGGCCGAGGCAATGAGTCAAGCAAATTCAGCCATAATGATGCAGAAAAGTAATTTTAAGGGCCAAAGAAGAGTTGTTAAATGTTTTAATTGTGGCAAAGAAGGACACATAGCCAGAAATTGCAGGGCCCCTAGAAAAAAGGGCTGTTGGAAATGTGGAAGAGAAGGACACCAAATGAAAGACTGCACTGAAAGACAGGCTAATTTTTTAGGGAAAATTTGGCCTTCCAACAAGGGGAGGCCCGGAAATTTCCTTCAGAGCAGACCAGAGCCAACAGCCCCACCAGCAGAGAGCTTCGGGTTCAGAGAGGAGATAACCCCCTCTCCGAAGCAGGAGCAGAAAGACGGGGAACTGTACCCTCCCTTAGCTTCCCTCAAATCACTCTTTGGCAACGACCCTTAGTCACAATAAAAATAGGGGGACAGATAAAGGAGGCTCTATTAGATACAGGAGCAGATGATACAGTATTAGAAGACATAAATTTGCCAGGAAAATGGAAACCAAAAATGATAGGGGGAATTGGAGGTTTTATCAAAGTAAAACAGTATGATAACATACTCATAGAAATTTGTGGACACAAGGCTATAGGTACAGTGTTAGTAGGACCTACGCCTGTCAACATAATTGGAAGAAATATGTTGACTCAGATTGGTTGTACTTTAAATTTTCCAGTTAGTCCTATTGAAACTGTACCAGTAAAATTGAAGCCAGGAATGGATGGCCCAAAGGTTAAACAATGGCCATTGACAGAAGAAAAGATAAAAGCATTAACAGAAATATGTCTAGAAATGGAAAAAGAAGGAAAAATTTCAAAAATTGGGCCTGAAAATCCATACAATACTCCAGTATTTGCCATAAAGAAAAAAGACAGTAGTAAATGGAGGAAATTAGTAGATTTCAAAGAACTTAATAAAAGAACTCAAGATTTCTGGGAGGTTCAATTAGGAATACCACATCCTGCAGGGTTAAAAAAGAAAAAGTCAGTAACAGTACTGGATGTGGGGGATGCATATTTTTCAGTTCCCTTAGATAAGGATTTCAAGAAGTACACTGCATTCACCATACCTAGTGTCAACAATGAGACACCTGGAATTAGGTACCAGTACAATGTGCTTCCACAAGGATGGAAAGGATCACCAGCAATATTCCAATGTAGCATGACAAAAATCTTAGAGCCCTTTAGAATGAAAAACCCAGACATAGTCATCTACCAATACATGGATGATTTGTATGTAGGGTCTGACTTAGAAATAGGGCAGCATAGAACAAAAATAGAGGAGTTAAGAGAACATCTACTGAGATGGGGATTTACTACACCAGACAAAAAACATCAGAAAGAACCTCCATTCCTTTGGATGGGGCATGAACTCCATCCTGATAAATGGACAGTGCAGCCTATACAATTGCCAAACAAGGACAGCTGGACTGTCAATGACATACAGAAGTTAGTAGGAAAACTAAATTGGGCAAGTCAGATTTATCCAGGGATTAAAGTAAGGCCATTATGTAAACTCCTTAGGGGAGCCAAGGCACTAACAGACATAGTGCCACTGACTGCAGAGGCAGAGTTAGAATTGGCAAAAAATAGGGAGATTCTAAGAGAACCAGTACATGGGGTATATTATGACCCATCAAAAGACTTAATAGCAGAAATACAGAAACAAGGAGACGGGCAATGGACATATCAAATTTATCAGAACCCATTTAAAAATCTAAAAACAGGAAAGTATGCAAAAGTGAGGTCGGCCCACACTAATGATGTAAAACAATTAACAGAAGCAGTACAAAAGATAGCTTTAGAAAGCATAGTAATATGGGGGAAGAGATCTCCTAAGTTTAAACTACCCATACTGAAAGAGACATGGGATACATGGTGGACAGATTATTGGCAAGCCACCTGGATTCCTGAATGGGAGTTTGTCAATACCCCCCCTCTAGTGAAACTATGGTACCAGTTAGAAACAGAGCCCATAGCAGGAGCAGACACCTTCTATGTAGATGGGGCATCTAATAGAGAGACCAAAAAAGGAAAAGCAGGATATGTTACTGATAAAGGAAAACAAAAAGTTGTCTCCCTAACGGAGACCACAAATCAGAAGGCTGAGTTACAAGCAATTTATTTAGCTTTGCAGGATTCAGGATCAGAAGTGAACATAGTAACAGACTCACAATATGCATTAGGAATCATTCAGGCGCAACCAGATAAGAGTGAATCAGAAATAGTCAATCAAATAATAGAGCAATTAATACAAAAGGAAAGGGTCTACCTGTCATGGGTACCAGCACACAAAGGGATTGGAGGAAATGAACAAGTAGATAAATTAGTCAGTGCTGGAGTCAGGAAAATACTGTTTTTAGATGGGATAGATAAGGCACAAGAAGAACATGAAAAATATCACAACAATTGGAGAGCGATGGCTAGTGATTTTAATCTGCCACCTATAGTAGCAAAAGAAATAGTAGCTAGCTGTGATAAGTGTCAGCTAAAAGGGGAAGCCATGCACGGACAAGTAGACTGTAGTCCAGGGATATGGCAATTAGATTGCACACATTTAGAAGGCAAGGTTATCCTGGTAGCAGTCCATGTAGCTAGTGAGTACATAGAAGCAGAAGTTATTCCAGCAGAAACAGGACAGGAAACAGCCTACTTCATATTAAAGTTAGCAGGAAGATGGCCAGTAAAAATAATACATACAGACAATGGCAGCAATTTCACCAGTGCCGCGGTTAAGGCATCCTGTTGGTGGGCAGGTATCCAACAGGAATTTGGAATCCCCTACAATCCCCAAAGTCAAGGAGTAGTAGAATCTATAAATAAAGAGTTAAAAAAGATCATAGGACAGGTAAGAGATCAAGCTGAACATCTTAAGACAGCAGTACAAATGGCAGTATTCATCCACAATTTTAAAAGAAAAGGGGGGATTGGGGGGTACAGTGCAGGGGAAAGAATAATAGACATAATATCAACAGACATACAAACTAGAGAATTACAAAAACAAATTACGAAAATTCAAAATTTCCGGGTTTATTACAGGGACAGCAGAAACCCAGTTTGGAAAGGACCAGCAAAGCTACTCTGGAAAGGTGAAGGGGCAGTAGTCATACAAGACAATAGTGAAATAAAGATAGTACCAAGGAGGAAAGCAAAGATCATTAGGGATTATGGAAAACAGATGGCAGTTGATGATTGTGTGGCAGGTAGACAGGATGAGGATTAACACATGGAAAAGTTTAGTAAAATATCATATGTATGTTTCAAAGAAAGCCAAAGGATGGTCTTATAGACATCACTTTCAAAGCAGGCATCCAAGAGTAAGTTCAGAAGTACACATCCCACTAGAGGAAGTTAAATTAGTAATAACAACATATTGGGGGCTGCACCCAGGAGAAAGAGAATGGCATCTGGGTCAGGGAGTCTCCATAGAATGGAGGCAGGGGAAGTATAGGACACAAATAGACCCTGGCCTGGCGGACCAACTGATCCATATATATTATTTTGATTGTTTTTCAGAATCTGCCATAAGGAAAGCCATATTAGGACATAGAATTAGCCCTAGGTGTAACTATCAAGCAGGACATAATAAGGTAGGATCCCTACAATATTTGGCACTAACAGCATTAATAGCTCCAGAGAAGACAAAGCCACCGCTGCCTAGTGTCCAGAAACTAGTAGAGGACAGATGGAACAAGCCCCAGGAGACCAGGGGCCACAGAGGGAGCCATACAATGAATGGGCACTAGAAATTTTAGAGGAGCTTAAGAATGAAGCTGTTAGGCATTTTCCTAGGCCATGGCTTCACGGCTTAGGCCAACATATCTATAACACCTATGGGGACACTTGGGAGGGAGTTGAAGCTATAATAAGGATATTGCAACAACTACTGTTTATCCATTTCAGAATTGGGTGCCGTCATAGCAGAATAGGCATTGTTCCACAGAGAAGAGTAAGAAATGGAGCCAGTAGATCCTAGCTTAGATCCCTGGAATCATCCAGGAAGCCAGCCTACAACTCCTTGTACCAAATGTTATTGTAAACGATGTTGCTTTCATTGCCAATGGTGCTTTACAACGAAGGGCTTAGGCATCTCCTATGGCAGGAAGAAGCGGAGACAGCGACACAGAACTCCTCAAAGCAGTCAAGTGCATCAAAATTCTCTACCAAAGCAGTAAGTAGTGTTAAATAGTATATGTAATGTCATATTTGTTAGCAATAGGGATAGCAGCATTAATAGTAGCACTAATAATAGCCATAGTTGTGTGGACTATAGTATATATAGAATATAAGAAACTGGTAAGGCAAAGAAAAATAAATAAATTATATAAAAGAATAAGAGAAAGAGCAGAAGACAGTGGCAATGAGAGTGAGGGGGATGCAGAGGAATTGGCAGCAATTGGGGAACTGGGGCATCTTATTCTTGGGAATATTGATAATCTGTAGCAATGCAGACAAATTGTGGGTCACAGTCTATTATGGGGTACCTGTGTGGAAAGAAGCAACACCCACTCTATTCTGTGCATCAGATGCTAAAGCATATGAGAAGGAGGTACATAATGTCTGGGCTACCCATGCCTGTGTACCCACGGACCCCAACCCACAAGAAGTATTTCTGAAAAATGTAACAGAAAATTTTGATATGTGGAAAAATAACATGGTAGAACAAATGCATACAGATATAATCAGTTTATGGGATCAAAGCCTAAAGCCATGTGTAAAGTTAACCCCACTCTGTGTGACTTTAAACTGTACTAATGCCACCAATAACAGTCAGGAAAAGCCAGGGGCAATGCAAAACTGTTCTTTCAATATGACCACAGAAGTAAGAGATAAGAAGCTGAAATTATCTGCGCTTTTTTATAGGCTTGATATAGTACCAATAGGCAATAACAATAGCAGTGAATATAGGCTAATAAATTGTAATACCTCAACCATTACACAGGCTTGTCCAAAGGTATCTTGGGATCCAATCCCTATACATTATTGTGCTCCAGCTGGTTATGCAATTCTAAAATGTAATGATAAAAGATTCAATGGGACAGGGCCATGCAAGAATGTCAGCACAGTACAATGTACACATGGAATTAAACCAGTGGTATCAACTCAATTGTTGTTAAATGGCAGCCTAGCAGAAGAAGGTATAGTAATCAGATCTCAAAATATCTCAAATAATGCAAAAACCATAATAGTACACCTTAATGAATCTGTACAGATTAATTGTACAAGACCCAACAACAATACAAGGAAAGGTATACATTTAGGACCAGGACAAACATTCTATGCAACAGGAGCAATAATAGGAGACATAAGAAAGGCACATTGTAACATTAGTGGAACACAATGGAATAACACTCTGGAGTATGTAAAGGCAGAATTAAAGTCGCATTTCCCTAATAATACAGCAATAAAATTTAACCAATCCTCAGGAGGGGACCTAGAAATTACAATGCATAGTTTTAATTGTAGAGGAGAATTTTTCTACTGCGATACATCAGGACTGTTTAATGACACAGGCTCCAATAATGGCACTATCACTCTCCCATGTCGGATAAAACAAATTGTAAACATGTGGCAGGGAGTAGGACGAGCAATGTATACCTCTCCCATTGCAGGAAACATTACCTGTAACTCAAATATTACAGGTTTACTATTGACAAGAGATGGTGGTAATGAGAGTAACATTGAGACCTTCAGACCTGAGGGAGGAAATATGAAAGACAATTGGAGAAGTGAACTATATAAGTATAAAGTAGTAGAAATTGAACCATTAGGAGTAGCACCCACCAAGGCAAAAAGACAAGTGGTGCAGAGAGAAAAAAGAGCAGCGGGACTAGGAGCTTTGTTCCTTGGGTTTCTTGGGGACAGCAGGGAGCATATGGGCGCGGCGTCGATAACGCTGACGGTACAGGCCAGACAATTATTGTCTGGAATAGTGCAACAGCAAAACAATTTGCTGAGGGCTATTGAAGCGCAACAGCATCTGTTGCAGCTCACAGTCTGGGGCATTAAACAGCTCCAGGCAAGAGTCCTGGCTGTGGAAAGATACCTAAAGGATCAACAGCTCCTAGGGATCTGGGGCTGCTCTGGAAAACTCATCTGCACCACTAATGTGCCCTGGAACTCTAGTTGGAGTAATAAATCTCAGGAAGAGATTTGGAATAACATGACCTGGATGGAGTGGGAAAAGGAGATTAGCAATTACTCAAACATAATATACAAATTGATTGAAGAGTCACAAAACCAGCAGGAAAAGAATGAACAAGAATTATTGGCATTAGACAAATGGGCAAGTCTGTGGAATTGGTTTGACATATCAAACTGGCTGTGGTATATAAAAATATTCATAATGATAGTGGGAGGCTTGATAGGCTTAAGAATAGTTTTTGCTGTACTTTCTATAGTAAATAGAGTTAGGAAGGGATACTCACCTTTGTCATTACAGACCCTTATCCCAAGCCCGAGGGGACCCGACAGGCCCGAAGGAATCGAAGAAGGAGGTGGAGAGCAAGGCAAAGACAGATCCGTGCGCTTAGTGACCGGATTCTTAGCTCTTGCCTGGGACGATCTGAGGAACCTGTGCCTCTTCAGCTACCGCCACTTGAGAGACTTCATATTAATTGCAGCGAGGATTGTGGACAGGGGCCTGAGGAGGGGGTGGGAAGCTCTCAAATATCTGGGGAATCTCACGCGGTATTGGAGTCAGGAACTAAAGAATAGTGCTATCAGCCTGTTTAATACCACAGCAATAGTAGTAGCTGAAGGGACAGATAGAATTATAGAAGTTTTGCAAAGAGCTGGTAGAGCTGTTCTCAACATACCTAGAAGAATAAGACAGGGCGCAGAAAGGGCTTTGCTGTAAAATGGGGGGCAAGTGGTCAAAAAGCAGTATAGTTGGATGGCCTGCTGTAGGGGAAAGAATGAGACAAACCCCTACAGCAGCAGAAGGGGTGGGAGCAGTGTCTCGAGACTTAGACAGACGGGGAGCAATTACAAGCAGCAATACTAGAACTACTAATCCTGACTTGGCCTGGCTGGAAGCACAAGAGGAGGAGGAAGTAGGCTTTCCAGTCAGACCTCAGGTACCTGTAAGACCAATGACCTATAAGGCAGCTGTAGATCTCAGTCACTTTTTAAAAGAAAAGGGGGGACTGGAAGGGTTAATTTACTCCAAGAAAAGAGGAGATACCCTTGATCTGTGGGTTTACCACACACAAGGCTACTTCCCTGATTGGCAGAACTACACACCAGGGCCAGGGATCAGATATCCACTGACCTTGGGATGGTGCTTCAAGCTAGTACCAGTTGATCCAGAAGAGGTGGAAAAGGCCAATGAAGGAGAGAACAACTGCTTGTTACACCCCATGAGCCAACATGGAATGGAGGATGAAGACAGAGAAGTACTGAGGTGGAAGTTTGACAGCAGCCTGGCACTGAGACACATAGCCAGAGAGAGACATCCGGAGTTCTACCAAGACTGAGACTGCTGACACAGAGATTGCTGACACAGAAGAATCTAAAAGGGACTTTCCACTGGGGACTTTCCAGAGGGCGGTCCAGAGGGCGGGACTGGGGAGTGGCTCACCCTCAGATGCTGCATATAAGCAGCCGCTTTTCGCCTGTACTGGGTCTCTCTAGTTAGACCAGATTTGAGCCTGGGGGCTCTCTGGCTAGCTGGGGAACCCACTGCTTA
>F2.CM.02.02CM_0016BBY_AY371158_G.NG.01.01NGPL0760_DQ168579
[truncated: 89,878 more chars]
