# Supplementary material for: More accurate recombination prediction in HIV-1 using a robust decoding algorithm for HMMs
Source: BMC Bioinformatics. 2011 May 17;12:168. doi: 10.1186/1471-2105-12-168 (PMC3123234; doi:10.1186/1471-2105-12-168)
Supplement: Additional file 1 — Data sets. This file contains sequences and their annotations for the single-breakpoint and short interval data sets. [file 1471-2105-12-168-S1.GZ › datasets/short_200_annotations.txt]

>A1.KE.97.ML752_AY322193_A2.CD.97.97CDKS10_AF286241
1	8335	A1
8336	8535	A2
8536	9091	A1

>A1.UZ.02.02UZ740_AY829208_B.UY.01.01UYTRA1092_AY781126
1	1492	A1
1493	1692	B
1693	8819	A1

>A1.KE.00.KER2012_AF457055_C.BW.96.96BW15C02_AF110974
1	1340	A1
1341	1540	C
1541	8795	A1

>A1.KE.00.KER2008_AF457052_D.ZA.86.R482_AY773341
1	8068	A1
8069	8268	D
8269	8813	A1

>A1.TZ.01.A173_AY253305_F1.BE.93.VI850_AF077336
1	4752	A1
4753	4952	F1
4953	8766	A1

>A1.KE.94.Q23_17_AF004885_F2.CM.02.02CM_0016BBY_AY371158
1	4599	A1
4600	4799	F2
4800	9163	A1

>A1.TZ.97.97TZ03_AF361873_G.ES.00.X558_AF423760
1	5548	A1
5549	5748	G
5749	9046	A1

>A1.TZ.01.A173_AY253305_H.BE.93.VI997_AF190128
1	6774	A1
6775	6974	H
6975	8766	A1

>A1.KE.99.KSM4021_AF457075_J.SE.94.SE7022_AF082395
1	2096	A1
2097	2296	J
2297	8822	A1

>A1.RW.93.93RW_024_AY713406_K.CD.97.EQTB11C_AJ249235
1	6350	A1
6351	6550	K
6551	8207	A1

>A2.CY.94.94CY017_41_AF286237_B.US.90.WEAU160_U21135
1	8297	A2
8298	8497	B
8498	9050	A2

>A2.CD.97.97CDKS10_AF286241_C.ZA.03.SK029B2_AY772691
1	4752	A2
4753	4952	C
4953	5323	A2

>A2.CY.94.94CY017_41_AF286237_D.UG.99.99UGA03349_AF484518
1	6556	A2
6557	6756	D
6757	9054	A2

>A2.CY.94.94CY017_41_AF286237_F1.BR.93.93BR020_1_AF005494
1	2480	A2
2481	2680	F1
2681	9060	A2

>A2.CD.97.97CDKFE4_AF286240_F2.CM.95.MP255_AJ249236
1	2008	A2
2009	2208	F2
2209	5100	A2

>A2.CD.97.97CDKTB48_AF286238_G.ES.00.X558_AF423760
1	7408	A2
7409	7608	G
7609	8972	A2

>A2.CY.94.94CY017_41_AF286237_H.BE.93.VI997_AF190128
1	4697	A2
4698	4897	H
4898	9060	A2

>A2.CD.97.97CDKTB48_AF286238_J.SE.94.SE7022_AF082395
1	2826	A2
2827	3026	J
3027	8972	A2

>A2.CD.97.97CDKTB48_AF286238_K.CD.97.EQTB11C_AJ249235
1	1530	A2
1531	1730	K
1731	8978	A2

>B.NL.96.H434_42_A1_AY970948_C.TZ.97.97TZ04_AF361874
1	3496	B
3497	3696	C
3697	8967	B

>B.KR.97.WK_AF224507_D.UG.99.99UGE23438_AF484489
1	1624	B
1625	1824	D
1825	9235	B

>B.RU.04.04RU139089_AY751407_F1.FR.96.MP411_AJ249238
1	1628	B
1629	1828	F1
1829	8960	B

>B.YE.02.02YE507_AY795904_F2.CM.97.CM53657_AF377956
1	6302	B
6303	6502	F2
6503	8218	B

>B.US.90.US1_AY173952_G.CM.96.96CMABB55_AY772535
1	1110	B
1111	1310	G
1311	9000	B

>B.TH.96.96TH_NP1538_AY713408_H.BE.93.VI991_AF190127
1	4611	B
4612	4811	H
4812	8163	B

>B.CO.01.PCM001_AY561236_J.SE.94.SE7022_AF082395
1	6779	B
6780	6979	J
6980	8793	B

>B.US.89.P896_U39362_K.CM.96.MP535_AJ249239
1	7465	B
7466	7665	K
7666	9707	B

>C.ZA.00.1217MB_AY463226_D.UG.98.98UG57132_AF484506
1	3257	C
3258	3457	D
3458	9058	C

>C.ZA.03.03ZASK006B2_AY878056_F1.BE.93.VI850_AF077336
1	5607	C
5608	5807	F1
5808	8454	C

>C.TZ.97.97TZ04_AF361874_F2.CM.95.MP257_AJ249237
1	3473	C
3474	3673	F2
3674	8834	C

>C.ZA.04.SK134B1_AY703909_G.NG.01.01NGPL0669_DQ168576
1	2526	C
2527	2726	G
2727	9028	C

>C.ZA.00.1214MB_AY463236_H.BE.93.VI991_AF190127
1	6211	C
6212	6411	H
6412	9098	C

>C.ZA.04.04ZASK196B1_DQ056413_J.SE.94.SE7022_AF082395
1	4749	C
4750	4949	J
4950	8465	C

>C.ZA.99.99ZACM9_AF411967_K.CM.96.MP535_AJ249239
1	7700	C
7701	7900	K
7901	9758	C

>D.UG.98.98UG57130_AF484504_F1.BE.93.VI850_AF077336
1	354	D
355	554	F1
555	8815	D

>D.UG.98.98UG57130_AF484504_F2.CM.02.02CM_0016BBY_AY371158
1	1412	D
1413	1612	F2
1613	8830	D

>D.UG.99.99UGE13613_AF484515_G.CM.96.96CMABB55_AY772535
1	1815	D
1816	2015	G
2016	8774	D

>D.KE.97.ML415_2_AY322189_H.BE.93.VI991_AF190127
1	7003	D
7004	7203	H
7204	9078	D

>D.UG.99.99UGE23438_AF484489_J.SE.94.SE7022_AF082395
1	3196	D
3197	3396	J
3397	8811	D

>D.UG.98.98UG57143_AF484514_K.CM.96.MP535_AJ249239
1	5239	D
5240	5439	K
5440	8793	D

>F1.BR.89.BZ126_AY173957_F2.CM.97.CM53657_AF377956
1	8434	F1
8435	8634	F2
8635	9030	F1

>F1.FI.93.FIN9363_AF075703_G.NG.01.01NGPL0760_DQ168579
1	5929	F1
5930	6129	G
6130	8967	F1

>F1.BR.93.93BR020_1_AF005494_H.BE.93.VI997_AF190128
1	6944	F1
6945	7144	H
7145	8968	F1

>F1.BE.93.VI850_AF077336_J.SE.94.SE7022_AF082395
1	1855	F1
1856	2055	J
2056	8903	F1

>F1.BE.93.VI850_AF077336_K.CM.96.MP535_AJ249239
1	5608	F1
5609	5808	K
5809	8903	F1

>F2.CM.02.02CM_0016BBY_AY371158_G.NG.01.01NGPL0760_DQ168579
1	5133	F2
5134	5333	G
5334	8359	F2

>F2.CM.02.02CM_0016BBY_AY371158_H.BE.93.VI991_AF190127
1	1418	F2
1419	1618	H
1619	8343	F2

>F2.CM.97.CM53657_AF377956_J.SE.94.SE7022_AF082395
1	3635	F2
3636	3835	J
3836	8782	F2

>F2.CM.95.MP257_AJ249237_K.CM.96.MP535_AJ249239
1	409	F2
410	609	K
610	8589	F2

>G.BE.96.DRCBL_AF084936_H.CF.90.056_AF005496
1	4824	G
4825	5024	H
5025	9705	G

>G.NG.92.92NG083_U88826_J.SE.93.SE7887_AF082394
1	6868	G
6869	7068	J
7069	8996	G

>G.BE.96.DRCBL_AF084936_K.CD.97.EQTB11C_AJ249235
1	3419	G
3420	3619	K
3620	9705	G

>H.CF.90.056_AF005496_J.SE.94.SE7022_AF082395
1	1880	H
1881	2080	J
2081	8953	H

>H.BE.93.VI991_AF190127_K.CD.97.EQTB11C_AJ249235
1	6502	H
6503	6702	K
6703	9053	H

>J.SE.93.SE7887_AF082394_K.CM.96.MP535_AJ249239
1	3576	J
3577	3776	K
3777	8943	J
