# Supplementary material for: More accurate recombination prediction in HIV-1 using a robust decoding algorithm for HMMs
Source: BMC Bioinformatics. 2011 May 17;12:168. doi: 10.1186/1471-2105-12-168 (PMC3123234; doi:10.1186/1471-2105-12-168)
Supplement: Additional file 1 — Data sets. This file contains sequences and their annotations for the single-breakpoint and short interval data sets. [file 1471-2105-12-168-S1.GZ › datasets/short_250.fas]

>A1.TZ.01.A173_AY253305_A2.CD.97.97CDKTB48_AF286238
GCGAGAGCGTCAATATTAAGTGGGGGAAAATTGGATGCATGGGAGAAAATTCGGTTAAGGCCAGGGGGAAAGAAAAAATATAGACTAAAACACCTAGTATGGGCAAGCAGGGAGCTGGACAGATTCGCACTTAACCCTAGCCTTTTAGAAACAACAGAAGGATGTCAACAGATAATGAACCAGTTACAACCAGCTGTCAAGACAGGAACAGAAGAAATTAAATCATTATTTAATACAGTAGCAACCCTCTATTGTGTACATCAACGGATAGATGTAAAAGATACCAAGGAAGCTCTAGATAAAATAGAGGAAATACAGAATAAGAGCAAGCAAAAGACACAACAGGCAGCAGCTGACACAGGAGACAGCAGCAAGGTCAGCCAAAATTACCCTATAATACAAAATGCACAAGGGCAAATGATACACCAGAACTTGTCACCTAGGACTTTAAATGCATGGGTAAAAGTAATAGAAGAAAAGGCTTTCAGCCCAGAAGTAATACCCATGTTCTCAGCATTATCAGAAGGAGCCACCCCACAAGATTTAAATGTGATGCTGAACATAGTGGGGGGACATCAAGCAGCTATGCAAATGTTAAAAGACACCATCAATGAAGAAGCTGCAGAATGGGACAGGTTACATCCAGTACAGGCAGGGCCTATTCCACCAGGCCAGATAAGAGAACCAAGAGGAAGTGACATAGCAGGAACTACTAGCACCCCTCAAGAACAATTACAATGGATGACAGGTAACCCACCTATCCCAGTGGGAAACATTTATAAAAGGTGGATAATCCTGGGATTAAATAAAATAGTAAGAATGTATAGCCCTGTTAGTATTTTGGATATAAAACAAGGGCCAAAAGAACCCTTCAGAGACTATGTAGATAGGTTCTTTAAGGCTCTCAGAGCTGAGCAAGCTACACAGGATGTAAAAGGTTGGATGACAGAAACCTTATTGGTCCAAAATGCAAATCCAGATTGTAAGTCCATCTTAAAAGCATTAGGATCAGGGGCTACATTAGAAGAAATGATGACAGCATGCCAGGGAGTGGGAGGACCTGGCCATAAAGCAAGGGTTTTAGCTGAGGCAATGAGCCAAGCACAACAGACAAACATAATGATGCAGAGAGGTAATTTTAGGGGCCAGAAAAGGATTAAGTGTTTTAACTGTGGCAAGGAAGGACACCTAGCCAGAAATTGCAGGGCCCCTAGGAAAAAGGGCTGTTGGAAATGTGGGAAAGAGGGACACCAAATGAAAGACTGCACTGAGAGACAGGCTAATTTTTTAGGGAAAATTTGGCCTTCCAGCAAAGGGAGGCCAGGAAATTTTCCCCAGAGCAGACCGGAGCCAACAGCCCCACCAGCAGAGCTCTTTGGGATGGGGGAAGGGATAGCCTCCCTTCCGAAACAGGAGCAGAAGGACAGGGAACAGGTCCCACCCTTAGTTTCCCTCAAATCACTCTTTGGCAACGACCCCTTGTCACAGTAAGAATAGGAGGACAGCTAAAAGAAGCCCTATTAGATACAGGAGCAGATGATACAGTATTAGAAGACATAAATTTGCCAGGAAAATGGAAACCAAAAATGATAGGGGGAATTGGAGGGTTTATCAAGGTAAAACAGTATGATCAGATACCTATAGAAATTTGTGGGAAAAGGGCTATAGGTACAGTATTAGTAGGACCTACACCTGTCAACATAATTGGAAGAAATATGTTGACCCAGATTGGTTGTACTTTAAATTTCCCAATTAGTCCTATTGAGACTGTACCAGTAAAATTAAAGCCAGGAATGGATGGCCCAAAAGTTAAACAATGGCCATTAACAGAAGAAAAAATAAGAGCATTAACAGAAATTTGTATGGAGATGGAAAAGGAAGGAAAAATTTCAAAAATTGGGCCTGAAAATCCATACAATACTCCAATATTTGCTATAAAGAAAAAAGACAGCACTAAATGGAGAAAATTAGTAGATTTCAGAGAGCTCAATAAAAGAACTCAAGACTTTTGGGAAGTTCAGTTAGGAATACCGCATCCAGCGGGCCTAAAAAAGAAAAAATCAGTAACAGTATTAGATGTGGGGGACGCATATTTTTCAGTTCCTCTAGATGAAAGCTTTAGGAAGTATACTGCGTTCACCATACCTAGTACAAACAATGAGACACCAGGAGTCAGGTATCAGTATAATGTGCTTCCACAGGGATGGAAAGGATCACCAGCAATATTCCAGAGTAGCATGACAAAAATCTTAGAGCCCTTTAGATCAAAAAATCCAGAAATAATTATCTATCAATACATGGATGACTTGTATGTAGGATCTGATTTAGAAATAGGGCAGCATAGAACAAAAATAGAAGAGTTGAGAAATCATCTATTGAAATGGGGATTTACTACCCCAGACAAAAAGCATCAGAAAGAACCACCATTTCTTTGGATGGGATATGAACTCCATCCTGACAAGTGGACAGTCCAGCCTATAGTACTGCCAGACAAAGAAAGCTGGACTGTCAATGATATACAGAAATTAGTGGGAAAACTAAATTGGGCAAGTCAAATTTATGCAGGGATTAAAGTAAAGCAATTGTGTAAACTCCTTAGAGGAACCAAAGCATTAACAGACATAGTACCACTGACTAGAGAAGCAGAATTAGAATTGGAAGAGAACAGGGAGATTCTAAAAGACCCTGTACATGGGGTATATTATGACCCATCAAAAGACTTAATAGCAGAAATACAGAAACAAGGGCAAGGCCAATGGTCATATCAAATTTATCAAGAACCATTTAAAAATCTAAAAACAGGGAAATATGCAAAAAGGAAGTCCACCCACACCAATGATGTAAAACAATTAGCAGAAGTGGTGCAAAAGGTGGTCACAGAAAGCATAGTAATATGGGGAAAGACTCCTAAATTTAAACTACCCATACAAAAGGAAACATGGGAAACATGGTGGATGGACTATTGGCAGGCTACCTGGATCCCTGAATGGGAATTTGTCAATACCCCTCCTCTAGTAAAATTATGGTACCAGTTAGAGAAAGACCCCATAATAGGAGCAGAGACTTTCTATGTAGATGGGGCAGCCAATAGGGAGACTAAGCTAGGAAGAGCAGGGTATGTCACTGATAGAGGAAGACAAAAGGTTGTTTCCCTAACTGAGACAACAAATCAGAAGACTGAACTACATGCAATCCAGCTAGCCTTGCAGGATTCAGGACCAGAAGTAAACATAGTAACAGACTCACAATATGCATTAGGAATCATTCAGGCACAACCAGACAGAAGTGACTCAGAGATAGTCAATCAAATAATAGAGAAGCTAATAGAAAAAGACAAAGTATACCTGTCATGGGTACCAGCACACAAAGGAATTGGAGGGAATGAACAGGTAGATAAATTAGTCAGTTCTGGAATCAGGAAGGTGCTATTTTTAGATGGGATAGATAAAGCTCAAGAAGACCATGAAAAATATCACAGCAATTGGAGAGCAATGGCTAGTGATTTTAATCTGCCACCTATAGTAGCAAAAGAAATAGTAGCCAGCTGTGATAAATGTCAACTAAAAGGGGAAGCAGTGCATGGACAAGTAGATTGTAGTCCAGGGATGTGGCAATTAGATTGTACACATCTAGAAGGAAAAGTAATTCTGGTAGCAGTCCATGTAGCCAGTGGATATATAGAAGCAGAAGTTATCCCAGCAGAAACAGGACCGGAGACAGCATACTTTCTGCTAAAATTAGCAGGAAGATGGCCAGTAAAAGTAGTACACACAGACAATGGCAGCAATTTCACCAGCGCTGCATTTAAAGCAGCCTGTTGGTGGGCAAGTGTCCAACAGGAATATGGGATTCCATACAATCCCCAAAGTCAAGGAGTAGTGGAATCTATGAATAAGGAATTAAAGAAAATCATAGGACAAGTAAGAGAGCAAGCTGAACACCTTAAAACAGCAGTACAAATGGCAGTATTCATTCACAATTTTAAAAGAAAAGGGGGGATTGGGGGGTACAGTGCAGGGGAAAGAATAATAGACATAATAGCAACAGACATACAAACTAAAGAATTACAAAAACAAATTACAAAAATTCAAAATTTTCGGGTTTATTACAGGGACAGCAGAGATCCAATTTGGAAAGGACCAGCAAAACTACTCTGGAAAGGTGAAGGGGCAGTAGTAATACAAGATAATAGTGATATAAAGGTAGTACCAAGAAGAAAAGCAAAGATCATTAGGGATTATGGAAAACAGATGGCAGGTGATGATTGTGTGGCAGGTAGACAGGATGAGGATTAGAACATGGAACAGTTTAGTAAAACATCATATGTATGTCTCAAGGAAAGCTAAAGATTGGTTTTATAGACATCACTATGAAAGCAGACATCCAAAAGTAAGTTCAGAAGTACACATCCCACTAGGGGATGCTAGATTAGTGGTACGAACATATTGGGGTCTGCAGACAGGAGAAAAAGATTGGCACTTGGGTCATGGGGTCTCCATAGAATGGAGGCTAAAAAGATATAGCACACAGATAGATCCTGACCTGGCAGACCAACTAATTCATCTGCATTACTTTGACTGTTTTTCAGACTCTGCCATAAGGAAAGCCATATTAGGACAAGTAGTTAGACCTAGGTGTGACTATCAAGCAGGACATAACAAGGTAGGATCTCTACAATATTTGGCACTGAAAGCATTAGTAACACCAAAAAAGATAAAGCCACCTTTGCCTAGTGTTAGGAAATTAGCAGAGGATAGATGGAACAAGCCCCAGAAGATCAGGGGCCCCAGAGGGAGCCATACAATGAATGGACACTAGAACTGTTAGAAGAGCTTAAGCATGAAGCTGTTAGACATTTTCCTAGGCCATGGCTACATGGATTAGGACAACATGTCTATGAAACCTATGGGGACACTTGGGAAGGAGTTGAAGCTATAATAAGAATATTGCAACAACTACTGTTTGTGCATTTCAGAATTGGGTGCCAACATAGCAGAATAGGCATTATTCGAGGAGGGAGAAGAGTCAGGAATGGATCCAGTAGATCCTAACCTAGAGCCCTGGAATCACCCAGGAAGTCAGCCTGCAACTGCTTGTAGCCCGTGTTACTGCAAAAAGTGTTGCTATCATTGTCAAGTTTGCTTTCTGAACAAAGGCTTAGGCATCTCCTATGGCAGGAAGAAGCGGAAACAGCGACGAAGACCTCCTCAAAGCAGTAAGGATCATCAAAATCCTATACCAAAGCAGTAAGTAAAATATATGTAATGACTCCTTTGGAAATTTGGGCAATAGTAGGACTGGTAGTGGCGCTAATCATAGTAATAGTTGTGTGGACTATAGTAGGCATAGAATATAAGAGATTGTTAAAACAAAGGAAAATAGACAGGTTGATTGAGAGAATAAGAGAAAGAGCAGAAGACAGTGGCAATGAGAGTGAAGGGGATACAGAGGAACTCTCAGCACTTCTTGAGATGGGGAACTATGATCTTGGGATTGATAATAATCTGTAGTGCTGCAGACAACTTATGGGTTACAGTCTACTATGGGGTACCAGTGTGGAAAGATGCAGAGACCACCTTGTTTTGTGCATCAGATGCGAAAGCATATGATGCAGAAGTGCATAATGTCTGGGCTACACATGCCTGTGTACCTACAGACCCCAACCCACAAGAAATACATTTGGAAAATGTGACAGAAGAGTTTAACATGTGGAAAAATAACATGGTAGAGCAGATGCATACAGATATAATCAGTCTATGGGACCAAAGCTTAAAGCCATGTGTAAAGTTAACCCCTCTCTGCGTTACTTTAAATTGTAGCAATGTCAGTAATAATACTGACAGTGACAACAGTGACAATGCCACCAATTCCACCATCACCAGGGAAATGATTGGAGAAATAAAAAACTGCTCTTTCAATATAACCACAGAAATAAGGGACAAGAAACAGAAAGTATATTCACTTTTTTATAAACTTGATGTAGTGGAAATTAGTAATAGTAATAGTAGTCAGTATAGATTAATAAACTGTAATACCTCAGCCATTACCCAGGCTTGTCCAAAGGTAACCTTTGAGCCAATTCCCATACACTATTGTGCTCCAGCTGGTTTTGCGATTCTAAAGTGTAAGAATAAAACGTTCAATGGAACAGGGCCATGCAATAATGTCAGCTCAGTACAATGCACACATGGAATCAGGCCAGTAGTATCAACTCAACTGCTGTTAAATGGCAGTCTAGCAGAAGGAGAGATACAAATTAGATCTGAGAATATCACAAACAATGCCAAAAATATAATAGTACAATTTACCGAGCCTGTACAAATTATTTGCATCAGACCTAACAACAATACAAGAAAAAGGGTACATATAGGACCAGGACAGACATTCTATGCAACAGACATAATAGGGAATATAAGACAAGCATATTGTACTGTCAATAGAACAGAATGGAATACAACTTTGCAAAAGGTAGGCAAACAATTAAGAGATTTATACTTTAATAACAAAACAATAATTTTTACTAGCTCCTCAGGAGGGGATCTAGAAATTACAACACATAGTTTTAATTGTGGGGGAGAATTTTTCTATTGTAACACATCAGGCCTGTTTAATGGCCTGTTTAATGGCACCTGGAATGGCAATCACACAAACAGCACGGAGTTAAATAGCACTATAATTCTCCAATGCAAAATAAAGCAAATTATAAATATGTGGCAGAGAGCAGGACAAGCAATATATGCCCCTCCCATCCAAGGAGTAATAAAGTGTGTATCAAATATTACAGGACTAATATTAACAAGAGATGGTGAGAGGAACAATAGTCTAAATGAAACCTTCAGACCTGGAGGAGGAGATATGAGGGACAATTGGAGAAGTGAATTATATAAGTATAAAGTAGTAAAAATTGAACCACTAGGAGTAGCACCTACCAGGGCAAAGAGAAGAGTGGTGGAGAGAGAAAAAAGAGCAGTCGGACTGGGAGCTGTCTTCATTGGGTTCTTAGGAGCAGCAGGAAGCACTATGGGCGCGGCGTCAGTAACGCTGACGGTACAGGCCAGACAATTATTGTCTGGCATAGTGCAACAGCAAAGCAATTTGCTGAGGGCTATAGAGGCTCAACAGCATCTGTTGAAACTCACGGTCTGGGGCATTAAACAGCTCCAGGCAAGAGTCCTGGCTGTGGAAAGATACCTAAAGGATCAACAGCTCCTAGGAATTTGGGGCTGCTCTGGAAAACTCATCTGCACCACTAATGTGCCCTGGAATTCTAGTTGGAGTAATAAATCCCATGATGACATATGGAATAACATGACCTGGCTGCAATGGGATAAAGAGATTAGCAATTACACACAGCTAATATATAATCTAATTGAAGAATCACAGAACCAGCAGGAAAAGAATGAACAAGAGTTATTGGCATTGGACAAGTGGGCAAGTCTGTGGAATTGGTTTGATATATCAAATTGGCTGTGGTATATAAGGATATTTATAATGATAGTAGGAGGCTTAATAGGATTAAGAATAATTTTTGCAGTGCTTTCTATAATAAATAGAGTTAGGCAGGGATACTCACCTTTGTCATTTCAGACCCATACCCCAAACCCAAGGGATCTCGACAGGCCCGGAAGAATCGAAGAAGAAGGTGGAGAGCAAGGCAGAGACAGATCGATTCGATTAGTGAGCGGATTCTTAGCACTTGCCTGGGACGATCTCCGGAGCCTGTGCCTCTTCAGCTACCACCGCTTGAGAGACTTCACCTTGATTGTTGCGAGGACTGTGGAACTTCTGGGACACAACAGTCTCAAGGGGTTGAGACTGGGGTGGGAGGGCCTCAAGTATCTGGGGAATCTCCTGGTGTATTGGGGACAGGAACTAAAAAGTAGTGCTATTAATTTGCTTGATACCATAGCAATAGCAGTAGCTGGCTGGACAGATAGGGTTATAGAAATAGGACAAAGAATTTGTAGAGCTATTTACAACATACCTAGAAGAATCAGACAGGGCTTAGAAAGGGCTTTGCTATAATATGGGGGGCAAGTGGTCAAAAAGTAGCATAGTGGGATGGCCTGAGATTAGGGAAAGAATAAGACGAACCCCTCCAGCAGTAAGAGGAGTAGGAGCAGTATCTCAAGATCTAGATAAACATGGAGCAATCACAAACAGCAATATAAATCACCCTAGTTGTGTCTGGCTGGAAGCACAAGAGGATGAGGATGTGGGCTTTCCAGTCAGGCCACAAGTACCTCTAAGACCAATGACTTACAAGGCAGCTTTTGATCTCAGCTACTTTTTAAATCACTCCAGGAGGAGACAAGACATCCTTGATCTGTGGGTGTACCACACACAGGGCTACTTCCCTGATTGGCAGTGTTACACACCAGGGCCAGGGATCAGGTACCCACTAACGTTTGGATGGTGCTTCAAGCTAGTTCCAGTTGATCCAGAAGAAGTAGAGAAGGCTACTGAAGGAGAGAACACCCGCCTATTACACCCTATAAGCCAGCATGGAATGGATGATGATGAGAGAGAAACATTAAGGTGGACATTTGACAGCAAGCTGGCATTAAAACACATAGCCAGAGAGCTGCATCCGGACTTCTACAAAGACTGCTGACACAGAAGTTGCTGACAGGGACTTTCCGCTGGGGACTTTCCAGGGGAGGTGTGGTTTGGGCGGAGTTGGGGAGTGGCTAACCCTCAGATGCTGCATATAAGCAGCTGCTTTTCGCCTGTACTGGGTCTCTCTTGGTAGACCAGATTGAGCCT
>A1.UG.99.99UGA07072_AF484478_B.CA.97.CANB3FULL_AY779553
GCGAGAGCGTCAGTATTAAGTGGGGGAAAATTAGATGCATGGGAGAAAATTCGGTTAAGGCCAGGGGGAAAGAAAAAATATAGACTAAAACATCTAGTATGGGCAAGCAGGGAGCTGGACAGATTTGCACTTAACCCTGGCCTTTTAGAAACAGCAGAAGGATGTCAACAAATAATGGCACAATTACAACCAGCTATCAAGACAGGAACAGAAGAAATTAAATCATTATTTAATACAGTAGCAACCCTCTATTGCGTACATCAAAGGATAGATATAAAAGACACCAAGGAAGCTTTAGATAAAATAGAGGAGATGCAAGATAAGAGCAAGCAAAAGACACAACAGGCAGCAGTTGATACAGGAAGCAGCAGCAAGGTCAGCCAAAATTACCCTATAGTGCAAAATGCACAAGGGCAAATGATACACCAGCCCGTATCACCAAGAACTTTGAATGCATGGGTGAAAGTAGTAGAAGAAAGGGGTTTCAGCCCAGAAGTGATACCCATGTTTTCAGCATTATCAGAAGGAGCCACCCCACAAGATTTAAATATGATGCTGAACATAGTGGGGGGACATCAGGCAGCTATGCAAATGTTAAAAGATACCATCAATGAGGAAGCTGCAGAATGGGACAGGGTACATCCAGTACATGCAGGGCCTATTCCACCAGGCCAGATGAGAGAACCAAGGGGAAGTGACATAGCAGGAACTACTAGTAATATTCAAGAACAAATAGGGTGGATGACAAGCAACCCACCTATCCCAGTGGGAGACATCTATAAAAGATGGATAATCCTGGGATTAAATAAAATAGTAAGAATGTACAGCCCTGTTAGCATCTTGGATGTAAAACAAGGGCCAAAAGAACCCTTTAGAGAATATGTAGACAGGTTCTTTAAAATTCTCAGAGCTGAACAAGCTACACAGGAGGTAAAAGGTTGGATGACAGACACCTTGCTGGTCCAAAATGCAAATCCAGATTGTAAGTCCATTTTAAAAGCATTAGGATCAGGGGCTACATTAGAAGAAATGATGACAGCATGCCAGGGAGTGGGAGGACCCAGCCATAAAGCAAGGGTTCTAGCTGAGGCAATGAGTCAAGTACAACAGGCAAACATAATGGTGCAGAGAGGCAATTTCAGGGGCCAGAAAAGGATTAAGTGTTTCAACTGTGGCAAAGAAGGACACCTAGCTAGAAATTGCAGGGCCCCTAGGAAAAAAGGCTGCTGGAAATGTGGGAAAGAAGGACACCAAATGAAAGACTGCACTGAAAGACAGGCTAATTTTTTAGGGAAAATTTGGCCTTCCAGCAAGGGGAGGCCAGGAAATTTTCCTCAGAGCAGACCGGAGCCAACAGCCCCACCAGCAGAGCTCTTTGGGATGGGGGAAGAGATGACCTCCCCTCCGAAGCAGGAGCAGAAAGACAGGGAACAGGTCCCACCCTTAGTTTCCCTCAAATCACTCTTTGGCAACGACCCCTTGTCACAGTAAGAATAGGAGGGCAGTTAAAAGAAGCTTTATTGGATACAGGAGCAGATGATACAGTATTAGAAGATATAAATTTACCAGGAAAATGGAAACCAAGAATGATAGGGGGAATTGGAGGCTTTATCAAGGTAAAACAGTATGATCAGATACTTATAGAAATTTGTGGAAAAAAGGCTATAGGTACAGTATTAGTAGGACCTACACCTGTCAACATAATTGGAAGAAATATGTTGACTCAGATTGGTTGTACTTTAAATTTTCCAATTAGTCCTATTGAGACTGTACCAGTAACATTAAAGCCAGGAATGGATGGCCCAAGGATTAAACAATGGCCATTGACAGAAGAAAAAATAAAAGCATTAACAAAAATTTGTAAAGAGATGGAAAAGGAAGGAAAAATTTCAAAAATTGGGCCTGAAAATCCATACAATACTCCAGTATTTGCTATAAAGAAAAAAGATAGCACTAAATGGAGAAAATTAGTAGATTTTAGAGAGCTCAATAAAAGAACTCAGGACTTTTGGGAAGTTCAATTAAGAATACCACATCCCGCAGGTTTAAAAAAGAAAAAATCAGTAACAGTACTAGATGTGGGGGATGCATATTTTTCAGTTCCTTTAGATGAAAATTTTAGAAAGTATACTGCATTCACCATACCTAGTATAAACAATGAGACACCAGGAATCAGGTATCAGTACAATGTGCTTCCACAGGGATGGAAAGGATCACCGGCAATATTCCAGAGTAGCATGACAAAAATCTTAGAGCCCTTTAGATCAAAAAATCCAGAAATAATTATCTATCAATACATGGATGACTTGTATGTAGGATCTGATTTAGAAATAGAGCAGCATAGAACAAAAGTGGAGGAGTTGAGAGCTCATCTATTGAGTTGGGGATTTACTACACCAGACAAAAAGCATCAGAAAGAACCACCATTTCTTTGGATGGGATATGAACTCCATCCTGACAAATGGACAGTACAGCCTATACAGCTGCCAAACAAAGAAAGCTGGACTGTCAATGATATACAGAAACTAGTGGGAAAACTAAATTGGGCAAGTCAAATTTATCCAGGGATTAAAGTAAAGCAACTGTGTAAACTCCTCAGAGGAGCCAAAACACTAACAGATATAGTGCCACTGACTGAAGAAGCAGAATTAGAATTGGCAGAGAACAGGGAGATTCTAAAAGACCCTGTGCATGGAGTATATTATGATCCATCAAAAGACTTAATAGCAGAAATACAGAAACAAGGGCAAGACCAGTGGACATATCAAATTTATCAAGAGCCATTTAAAAATCTGAAAACAGGGAAATATGCAAGAAAAAAGTCTGCTCACACTAATGATGTAAAACAACTGGCAGAAGTGGTGCAAAAAGTGGTCCTGGAAAGCATAGTAATATGGGGAAAGACTCCTAAATTTAAATTACCCATACAAAAAGAAACATGGGAAACATGGTGGATGGACTATTGGCAGGCTACCTGGATTCCTGACTGGGAGTTTGTCAATACCCCTCCTCTAGTAAAATTATGGTACCAGTTAGAAAAAGACCCCATATCAGGAGTAGAGACTTTCTATGTAGATGGGGCAGCTAATAGGGAAACTAAGTTAGGAAAAGCAGGATATGTCACTGACAGAGGAAGACAAAAGGTTGTTTCCCTAGATGAGACAACAAATCAAAAGGCTGAACTACATGCAATCCTTTTAGCCTTGCAGGATTCAGGATCAGAAGTAAATATAGTAACAGACTCACAGTATGCATTAGGAATCATTCAGGCACAACCAGACAGAAGTGAATCAGAGTTAGTCAATCAAATAATAGAGAAGCTAATAGGAAAGGACAAAGTCTACCTGTCATGGGTACCAGCACACAAGGGGATTGGAGGAAATGAACAAGTAGATAAATTAGTCAGCTCTGGAATCAGGAAAATACTATTTTTAGATGGGATAGATAAGGCTCAAGAAGAACATGAAAGATATCACAGCAATTGGAGAACAATGGCTAGTGATTTTAATCTGCCACCTATAGTAGCAAAGGAAATAGTAGCCAGCTGTGATAAATGTCAACTAAAAGGGGAAGCCATGCATGGACAAGTAGACTGTAGCCCAGGGATGTGGCAATTAGATTGCACACATCTAGAAGGAAAAGTGATTCTGGTAGCAGTCCATGTAGCCAGTGGCTATATAGAAGCAGAAGTTATCCCAGCAGAAACAGGACAGGAGACAGCATACTTTCTACTAAAATTAGCAGGAAGGTGGCCAGTAAAAGTAGTACACACAGACAATGGCCCCAATTTCACCAGCGCTGCATTTAAAGCAGCCTGTTGGTGGGCAAATGTCCAACAGGAATTTGGGATTCCCTACAATCCCCAAAGTCAAGGAGTAGTGGAATCTATGAATAAGGAATTAAAGAAAATCATAGGGCAGGTAAGAGAGCAAGCTGAACACCTTAAGACAGCAGTACAAATGGCAGTATTCATTCACAATTTTAAAAGAAAAGGGGGGATTGGGGGATACAGTGCAGGGGAAAGAATAATAGACATAATAGCAACAGACATACAAACTAGAGAACTACAAAAACACATTACAAAAATGCAAAATTTTCGGGTTTATTTCAGGGACAGCAGAGATCCACTTTGGAAAGGACCAGCAAAACTACTCTGGAAAGGTGAAGGGGCAGTAGTAATACAGGATAATGGTGATATAAAGGTAGTGCCCAGAAGAAAAGCAAAGATCATTAGGGATTATGGAAAACAGATGGCAGGTGATGATTGTGTGGCAGGTAGACAGGATGAGGATTAGAACATGGAACAGTTTAGTAAAACATCATATGTATGTCTCAAAGAAAGCTAAAGGTTGGTTTTATAGACATCACTTTGAAAGCAGACATCCAAAAGTAAGTTCAGAAGTACACATCCCACTAGGAGATGCTAGACTAGTAGTAACAACATATTGGGGTCTGCAGACAGGAGAAAAAGACTGGCAATTGGGTCATGGGGTCTCCATAGAATGGAGGCTAAAAAGATATAGCACACAAATAGATCCTGACCTGGCAGACCAACTAATCCATCTGCATTATTTTAACTGTTTTTCAGACTCTGCCATAAGGAGAGCCATATTAGGACAAGTAGTTAGCCCTAGTTGTGAATATCAAGCAGGACATAACAAGGTAGGATCTCTACAATATTTGGCACTGAGAGCATTAGTAACACCAACAAGGACAAGGCCACCTTTGCCTAGTGTTAGGAAGTTAGCAGAGGACAGATGGAACAAGCCCCAGAAGACCAGGGGCCACAGAGGGAGCCATACAATGAATGGACATTAGAACTGTTAGAAGAACTTAAGCATGAAGCTGTTAGACATTTTCCTAGGCCATGGCTCCATGGATTAGGACAACATATCTATAACACCTATGGGGATACTTGGGAAGGAGTTGAAGCTATAATAAGAACTTTGCAACAACTACTGTTTGTCCATTTCAGAATTGGGTGCTCACATAGCAGAATAGGCATTACGCGAAGGAGAAGAGCTAGGGATGGATCCAGTAGATCCTAACCTAGAGCCCTGGAACCATCCGGGAAGTCAGCCTGCAACTGCTTGTAGCACGTGTCACTGTAAAAAGTGTTGCTATCATTGTCCAGTTTGCTTTCTGAACAAAGGCTTAGGCATCTCCTATGGCAGGAAGAAGCGGAGACAGCGACGAAGAGCTCCTCAAAGCAGTAAGGATCATCAAAATCCTGTACCAAAGCAGTAAGTAGTAGTAATTAAGTATATGTAATGACTCCTTTGGAAATCTCTGCAATAGTAGGACTGGTAGTGGCGCTAATCCTAGCAATAGTTGTGTGGACTATAGTAGGTATAGAATATAAGAGATTAAGAAAGCAAAGGAAAATAGACAGGATAATTAAGAGAATAAGTGAAAGAGCAGAAGACAGTGGCAATGAGAGTGATGGGGACGCAGAGGAATTGGCAAAACTTGTGGAGATGGGGTACTATGATCTTGGGGATGATAATAATTTGTAGTACTGCAGAAAACTTGTGGGTTACTGTCTACTATGGGGTACCTGTGTGGAAAGACGCAGAGACCACCTTATTTTGTGCATCAGATGCGAAAGCGTATGATACAGAAATGCATAATGTCTGGGCTACGCATGCCTGTGTACCTACAGACCCCAACCCACAAGAAATAAATTTGAAAAATGTGACAGAAGAATTTAACATGTGGAAAAATAACATGGTAGAGCAGATGCATGCAGATATACTTAGTCTATGGGACCAAAGCCTAAAGCCATGTGTAAAGTTAACCCCTCTCTGCGTTACTTTAGAATGTCAAAACTATGAAGGCACCAATTTAACTAATAGTAACACCACTGTCAACATCACCGAGGACATGAAAGGAGAAATAAAAAACTGCTCTTTCAATATGACCACAGAATTAAGGGATAAGAGGCAGAAAATGCATTCGCTTTTTTATAGACTGGATATAGTACAAATTAATGGCAACAGAAGCAATAGTAGTGAACAGTATAGATTAATAAATTGTAATACCTCAGCCATTACACAAGCTTGTCCAAAGGTATCCTTTGAGCCAATTCCCATACATTATTGTGCCCCAGCTGGTTTTGCGATTCTGAAGTGTAAGGATAGAGATTTCAATGGAACAGGGCCATGCACAAATGTCAGTACAGTACAATGTACACATGGAATTAGGCCAGTAGTGTCAACTCAACTGCTGTTAAATGGCAGTTTAGCAGAAGAAGAGGTAGTAATTAGATCTGCCAATTTCACGGACAATACTAAAACCATAATAGTACAGCTGAACGAAACTGTAGAAATTAATTGTACAAGACCCAACAACAATACAAGAAAAAGTATACATATAGCACCAGGGAGAGCATTTTATGCAACAGGAGAAATAACAGGGGATATAAGACAAGCATATTGTGATGTCAATAGAACAGAATGGAATAAAACTTTGCAAGAGGTAGCCTACCAATTAGGAAAACACTTTGGGAACAAAACAATAATCTTTGCTAACTCCACAGGAGGGGATCTAGAAATAACAACACATAGTTTTAATTGTGGAGGAGAATTTTTCTATTGTAACACAACAAACCTGTTTAATAACATTTGGAGTAATGCCAGCATGCAGAAGGCAAATAGCATAAACGACACTATAACTCTCCAATGCAGAATAAAGCAAATTATAAATATGTGGCAGAGAGTAGGACAAGCAATATATGCCCCTCCCATCCAAGGAGTGATAAAGTGTGAATCAAACATTACAGGACTAATATTAACAAGAGATGGTGGGGGTAATAACAATACAAATGAAACCTTCAGACCTGGAGGAGGAGATATGAGGGACAATTGGAGAAGTGAATTATATAAGTATAAAGTAGTAAAAATTGAACCACTAGGAGTAGCACCTACCAGGGCAAAGAGAAGAGTGGTGGAGAGAGAAAAAAGAGCAGTTGGAATGGGAGCTGTCCTCATTGGGTTCTTAGGAGCAGCAGGAAGCACTATGGGCGCGGCGTCAATAACGCTGACGGTACAGGCCAGACAATTATTGTCTGGCATAGTGCAACAGCAAAGCAATTTGCTGAGGGCTATAGAGGCTCAACAGCATCTGTTGAAACTCACGGTCTGGGGCATTAAACAGCTCCAGGCAAGAGTCCTGGCTGTGGAAAGATACCTAAAGGATCAACAGCTCCTAGGAATTTGGGGCTGCTCTGGAAAACTCATCTGCACCACTAATGTGCCCTGGAACTCTAGTTGGAGTAATAAATCCCAGAGTGAGATATGGGACAACATGACCTGGCTGCAATGGGATAAAGAAATTAGCAATTACACACAGATAATATATAATCTAATTGAAGAATCGCAGATCCAGCAGAAAAAGAATGAACAAGACTTATTGGCATTGGACAAGTGGGCAAACCTGTGGAATTGGTTTGACATATCAAACTGRCTGTGGTATATAAGAATATTTATAATGATAGTAGGAGGCTTAATAGGATTAAGAATAGTTTTTACTGTGCTTTCCATAATAAATAGAGTTAGGCAGGGATACTCACCTTTGTCGTTCCAGACCCATACCCCAAACCCAAGGGGTCTCGACAGGCCAGGAAGAATCGAAGAAGAAGGTGGAGAGCAAGACAGAGACAGATCGATTCGATTAGTAAGCGGATTCTTAGCACTTGCCTGGGACGATCTGCGGAGCCTGTGCCTTTTCAGCTACCACCGATTGAGAGACTTCATCTTGATTGTAGCGAGGACTGTGGAACTTCTGGGACACAGCAGTCTCAAGGGACTGAGACTGGGGTGGGAAGGCCTCAAGTATCTGGGGAATCTTCTAATATATTGGGGTCAGGAACTAAAAATTAATGCTATTAATTTGCTTGATACCATAGCAATAGCAACAGCTGAGTGGACAGATAGGGTTATAGAAATAGGACAAAGACTTTGTAGAGCTATTCTCCACATACCTAGAAGAATCAGACAGGCCTTAGAAAGGGCTTTGCTATAACATGGGGGGCAAGTGGTCAAAAAGTAGCATAGTGGGATGGCCTGAGATTAGGGAGAGAATAAGACGAACTCCAGCAGCAGCAAAAGGAGTAGGAGCAGTATCTCAAGGTTTAGATCAATATGGAGCAATCACAAGCAGCAATATAAATCACCCTAGTTGCGCCTGGCTGGAAGCGCAAGAGGACGAGGAGGTAGGCTTTCCAGTTAGGCCACAGATACCTTTAAGACCAATGACTTACAAGGGAGCTTTTGATCTCAGCCACTTTTTAAAAGAAAAGGGGGGACTGGATGGGTTAATTTACTCCAGGAAGAGACAAGAGATCCTTGATCTGTGGGTATACCACACACAAGGCTTCTTCCCTGATTGGCAGAATTACACACCAGGGCCAGGGACCAGATACCCACTAACATTTGGATGGTGCTTCAAGCTAGTACCAGTTGATCCAGATGAAGTGGAGAAGGCTACTGAGGGAGAGAACAACAGCCTGTTACACCCTATATGCCAACATGGAATGGATGATGAGGAGAGAGAAACATTAATGTGGAAGTTTGACAGCCGCCTGGCATTAAAACACAGAGCCCTAGAGTTGCATCCGGAGTTCTACAAAGACTGCTGACACAGAAGTTGCTGACAGGGACTTTCCGCTGGGGACTTTCCAGGGGAGGTGTGGTTTGGGCGGAGTTGGGGAGTGGCCAACCCTCAGATGCTGCATATAAGCAGCTGCTTTTCGCCTGTACTGGGTCTCTCTTGGTAGTCCAGATCGAGCCTGGGAGCTCTCTGGCTAGCAAGGGAACCCACTGCT
>A1.KE.00.MSA4076_AF457084_C.ZA.03.03ZASK076B1_AY901975
GCGAGAGCGTCAGTATTAAGTGGGGGAAAATTAGATGCATGGGAGAAAACTCGGTTAAGGCCAGGGGGAAAGAAAAAATATAAACTGAAACATATAGTATGGGCAAGCAGGGAGCTGGAAAGATTCGCACTTAACCCTAGCCTTTTAGAAACAACAGAAGGATGTCAACAAATAATGAACCAATTACAACCAGCTCTCAATACAGGGACAGAAGAACTTAGATCATTATTTAATACAGTAGCAACCCTCTATTGTGTACACCAACGGATAGAGATAAAAGACACCAAGGAAGCTCTAGATAAAATAGAGGAAATGCAAAATAAGAGCAAGCAAAAGACACAGCAGGCAGGAGCTGATACAGGAAATAGCAGCCAGGTCAGCCAAAATTACCCTATAGTGCAAAACGCACAAGGGCAAATGATACATCAGAGCTTGTCACCTAGGACTTTGAATGCATGGGTAAAAGTAATAGAAGAAAAGGCTTTCAGCCCAGAAGTGATACCCATGTTTTCAGCATTATCAGAAGGAGCCACCCCACAAGATTTAAATATGATGCTGAACATAGTGGGGGGACACCAGGCAGCTATGCAAATGTTAAAAGATACCATCAATGAGGAAGCTGCAGAATGGGACAGATTACATCCAGTACAGGCAGGGCCTATTCCACCAGGCCAGATGAGAGAACCAAGGGGAAGTGATATAGCGGGAACTACTAGTACCATACAAGAACAAATAGGATGGATGACAGGCAACCCACCTATCCCAGTGGGAGACATCTATAAAAGATGGATAATCCTGGGATTAAATAAAATAGTAAGAATGTATAGCCCTGTTAGCATTTTGGATATAAAACAAGGGCCAAAAGAACCCTTCAGAGATTATGTAGATAGGTTCTTTAAAGCTCTCAGAGCTGAACAAGCTACACAGGATGTAAAAAGGTGGATGACTGAAACATTACTGGTCCAAAATGCAAATCCAGATTGTAAGTCCATTCTAAAAGCATTAGGAGTAGGGGCTACACTAGAAGAAATGATGACAGCATGTCAGGGAGTGGGAGGACCCGGCCATAAAGCAAGGGTCTTGGCTGAGGCAATGAGTCAAGTACAACATACAAACATAATGATGCAGAGAGGTAATTTTAGGGGCCAGAAAAGGATGATTAAGTGTTTTAACTGTGGCAAAGAAGGACACCTAGCCAGAAATTGTAGGGCCCCTAGGAAAAAGGGCTGTTGGAAATGTGGGAAGGAGGGACACCAAATGAAAGACTGCACTGAAAGACAGGCTAATTTTTTAGGGAAAATTTGGCCTTCCAGCAAAGGGAGGCCAGGAAATTTTCCTCAGAACAGACTGGAACCAACAGCTCCACCAGCAGAGATCTTTGGGATGAGGGAAGAGATAGCCTCCCCTCCGAAGCAGGAGCAGAAAGACAGGGAACCCTTAATTTCCCTCAAATCACTCTTTGGCAACGACCTCTCGTCACAGTAAGAGTAGGGGGACAGCTAAAAGAAGCTCTATTAGATACAGGAGCAGATGATACAGTATTAGAAGACATAAATTTGCCAGGAAAATGGAAACCAAAAATGATAGGAGGAATTGGAGGTTTTATCAAGGTAAGACAATATGATCAAATACCTATAGAAATTTGTGGAGAAAAGGCTATAGGTACAGTATTAGTGGGGCCTACACCTGTCAACATAATTGGAAGGAACATGTTGACTCAGCTTGGATGCACACTAAATTTTCCAATTAGTCCCATTGAAACTGTACCAGTAAAATTGAAGCCAGGAATGGATGGCCCAAAGGTTAAACAATGGCCATTGACAGAAGAGAAAATAAGAGCATTAACAGAAATTTGTACAGAAATGGAAAAGGAAGGAAAAATTTCAAAAATTGGGCCTGAAAATCCATACAACACCCCAATATTTGCAATAAAGAAAAAAGATAGTACTAAATGGAGAAAATTAGTAGATTTCAGAGAGCTCAATAAAAGAACACAAGACTTTTGGGAAGTTCAATTAGGAATACCGCATCCAGCGGGCCTAAAAAAGAAAAAATCAGTAACAGTACTAGATGTGGGGGACGCATATTTTTCAGTTCCTTTAGATGAAAGCTTTAGAAAGTATACTGCGTTCACCATACCTAGTAGAAACAATGAGACACCAGGAATCAGGTATCAGTACAATGTGCTACCACAGGGATGGAAAGGATCACCGGCAATATTCCAGGCTAGCATGACAAAAATCTTAGAGCCCTTTAGATCACAAAATCCAGACATAATTATCTATCAATACATGGATGACTTGTATGTAGGATCTGATTTAGAAATAGGGCAGCATAGAACAAAAATAGAAGAGTTGAGAGCTCATCTATTGAGCTGGGGATTTACCACACCAGACAAAAAGCATCAGAAAGAACCTCCATTCCTTTGGATGGGGTATGAGCTCCATCCTGACAAGTGGACAGTCCAGCCTATAGTACTGCCAGAAAAGGACCACTGGACTGTCAATGATATACAGAAATTAGTGGGGAAACTAAATTGGGCAAGCCAAATTTATCCAGGGATTAAAGTAAAGCAATTGTGTAAACTCCTTAGGGGAGCCAAAGCACTAACAGATATAGTAACATTGACTGAGGAAGCAGAATTAGAATTGGCAGAGAACAGGGAGATTCTAAAAGAACCTGTGCATGGAGTATATTATGACCCATCAAAAGACTTAATAGCAGAAATACAGAAACAAGGGCAAGACCAATGGACATATCAAATTTATCAAGAGCCATTTAAGAATCTAAAAACAGGAAAATATGCAAGAAAAAGGTCTGCGCACACTAATGATGTAAAACAATTAACAGAAGTGGTGCAAAAAGTGACCATGGAAAGCATAGTAATATGGGGAAAGACTCCTAAATTTAAACTACCCATACAAAAAGAAACATGGGAAACATGGTGGATGGACTATTGGCAAGCTACTTGGATTCCTGAATGGGAATTTGTCAATACCCCTCCTCTAGTAAAATTGTGGTACCAATTAGAAAAAGACCCCATAGCAGGAGCAGAGACTTTCTATGTAGATGGGGCAGCCAATAGGGAGACTAAGCTAGGAAGAGCAGGGTATGTCACTGACAAGGGAAGACAAAAGGTTGTTTCCCTAACAGAGACAACAAATCAAAAGACTGAACTACATGCAATCTATCTAGCCTTGCAGGATTCAGGATCAGAAGTTAACATAGTAACAGACTCACAGTATGCATTAGGAATCATTCAGGCACAACCAGACAGGAGTGAATCAGAGTTAGTCAATCAAATAATAGAGAAGCTAATAGGAAAAGACAGAGTCTACCTGTCATGGGTCCCAGCACACAAAGGAATTGGAGGAAATGAACAAGTAGATAAATTAGTCAGTGCTGGAATCAGGAAGATACTATTTTTAGATGGGATAGATAAGGCTCAAGAAGATCATGAAAGATATCATAGCAATTGGAGAACAATGGCTAGTGATTTTAACCTGCCACCTGTAGTAGCAAAGGAGATAGTAGCCAGCTGTGATAAATGTCAGCTAAAAGGGGAAGCCATGCATGGACAGGTAGACTGTAGCCCAGGGATATGGCAATTAGATTGCACACATCTAGAAGGAAAAGTAATTCTGGTAGCAGTTCATGTAGCCAGTGGCTATATAGAAGCAGAAGTTATCCCAGCAGAAACAGGGCAGGAGACAGCATACTTTCTGCTAAAATTAGCAGGAAGATGGCCAGTAAAAGTAATTCACACAGACAATGGCAGCAATTTCACCAGTGCTGCAGTTAAAGCAGCCTGTTGGTGGGCAGGTATCCAACAGGAATTTGGGATTCCCTACAATCCCCAAAGTCAAGGAGTAGTGGAATCTATGAATAAGGAATTAAAAAAAATCATAGGGCAGGTAAGAGAGCAAGCTGAACATCTTAAAACAGCAGTACAAATGGCAGTATTCATTCACAATTTTAAAAGAAAAGGGGGGATTGGGGGGTACAGTGCAGGGGAAAGAATAATAGACATAATAGCAACAGACATCCAAACTAAAGAACTACAAAAACAAATTACAAAAATTCAAAATTTTCGGGTTTATTACAGGGACAGCAGAGATCCACTTTGGAAAGGACCAGCAAAACTACTCTGGAAAGGTGAAGGGGCAGTAGTAATACAGGACAATAGTGATATAAAAGTAGTGCCCAGAAGAAAAGCAAAAATCATTAGGGATTATGGAAAACAGATGGCAGGTGATGATTGTGTGGCAGGTAGACAGGATGAGGATTAGAACATGGAACAGTCTAGTAAAACATCATATGTATGTCTCAAAGAAAGCTAAAGCTTGGTTTTATAGACATCATTTTGAAAGCAGTCATCCAAAAGTAAGTTCAGAAGTACACATCCCACTAGGAGACGCTAGATTAGTAGTAAGAACATATTGGGGTCTGCATACAGGAGAACAAGACTGGCACTTGGGTCATGGGGTTTCTATAGAATGGAGGCTAAAAAGATATAGCACACAAATAGATCCTGACCTGGCAGACCAACTAATTCATCAGTATTATTTTAACTGTTTTTCAGACTCTGCCATAAGGAAAGCCATATTAGGACAAGTAGTTAGCCCTAGCTGTGAATATCAAGCAGGACATAAAAAGGTAGGATCTCTACAATATTTGGCACTGAAAGCATTAGTAACACCAACAAGAGTAAAGCCACCTTTGCCTAGTGTTAGGAAATTAACAGAGGACAGATGGAACAAGCCCCAGAAGACCAAGGGCCACAGAGGGAGCCATACAATGAAGGGACATTAGAAGTGTTAGAAGAGCTTAAGCATGAAGCTGTTAGACACTTTCCTAGGCCATGGCTTCATGGATTAGGACAACATATCTATAACACCTATGGGGATACTTGGGAAGGAGTTGAAGCTATAATAAGAATTTTGCAACAACTATTGTTTGTTCATTTCAGAATTGGGTGCTCACATAGCAGAATAGGCATTATTCGAGGGAGAAGAGGCAGGGATGGATCCAGTAGATCCTAACCTAGAGCCCTGGAACCATCCGGGAAGTCGGCCTACAACTGCTTGTAACAATTGCTACTGTAAAAGATGTTGCTATCATTGTCAAAAATGCTTTCTGAACAAAGGCTTAGGCATCTCCTATGGCAGGAAGAAGCGGAGACAGCGACGAGGAACTCCTCAAAGCAATAAGAATCATCAAAATCCTATACCAAAGCAGTAAGTATTAGTAATTAGTATATGTAATGAATTCTTTAGAAATCTGGGCAATAGTAGGACTGGTAGTGGCGCTAATCCTAGCAATAGTTGTGTGGACTATAGTAGGTATAGAATATAAGAGATTAAGAAGGCAAAAGAAAATAGATAGGTTAATTAAGAGAATAAGTGAAAGAGCAGAAGACAGTGGCAATGGGAGCGATGGGGATACAGATGAATTGGCAAAACTTGTGGAGATGGGGGACTATGATCTTGGGAATGTTAATAATTTGTAGTGTTGCAGAAAAATCGTGGGTTACTGTCTACTATGGGGTACCTGTGTGGAGAGATGCAGAGACCACCTTGTTTTGTGCATCAGATGCGAAAGCACATGATAAGGAAGTGCATAATGTTTGGGCTACACATGCCTGTGTACCTACAGACCCCAACCCACAAGAAATGATTTTGGAAAATGTGACAGAAGATTTTAACATGTGGAAAAATAGCATGGTAGAGCAGATGCATACAGATATAATCAGTCTATGGGACCAAAGCCTAAAGCCATGTGTAAAGTTAACCCCTCTCTGTGTTACTTTAAATTGTAGTGATAGCAATATCACCTCTAATAGCACCTCTAATAGCACCAAGGACAGTGCCACCCTTGATATGAAAAGCGAAATACAAAACTGCTCTTTCAATATGACCACAGAACTAAGGGATAAGAAACAGAAAGTATATTCACTTTTTTATAGACTTGATGTAGTACAAATTAATGAAAATAGTAGTGACTATAGATTAATAAATTGTAATACCTCAGCCATCACACAAGCATGCCCAAAGGTAACCTTTGAGCCAATTCCCATACATTATTGTGCCCCAGCTGGTTTTGCGATTCTAAAGTGTAATGATAAGAAATTCAATGGAACAGGACCATGCACTAATGTCAGCACAGTCCAATGCACACATGGAATCAAGCCAGTAGTAACAACTCAACTGCTGTTAAATGGCAGTCTAGCAGAAGAAGAAGTAATGATTAGATCTGAAAATATTACAGAAAATGCCAAAAACATAATAGTACAATTTAAAGAGCCTGTACAAATTATTTGTATCAGACCTGGCAACAATACAAGAAAAAGTGTGCATATAGGACCAGGACAAGCATTCTATGCAACAGGTGACATAATAGGGGATATAAGACAAGCACATTGTAATGTCAGTAGAGAGTTATGGAATAAAACTTTGCAAGAAGTAGCCACCCAATTAAGAAAACACTTTAGGAACAACACAAAGATAATCTTTACTAACTCCTCAGGAGGAGATGTAGAAATAACAACACATAGTTTTAATTGTGGAGGAGAATTTTTCTATTGTGACACATCAGGCCTGTTTAATAGCAGTTGGACTGCTAGCAATGATAGCATGCAGGAGGCACATAGCACAGAGTCAAATATAACTCTCCAATGCAGAATAAAGCAAATTATAAATATGTGGCAGAGAGCAGGACAAGCAATGTATGCCCCTCCCATTCCAGGAATAATAAGGTGTGAATCAAACATTACAGGACTAATATTAACAAGAGATGGTGGTGAGGGTAATAACAGTACAAATGAAACCTTCAGACCAGTAGGAGGAAATATGAGGGACAATTGGAGAAGTGAATTATATAAGTATAAAGTAGTAAAAGTTGAACCACTAGGAGTAGCACCCACCAAGTCAAGGAGGAGAGTGGTGGAGAGAGAAAAAAGAGCAGTTGGACTAGGAGCTGTGTTCATTGGGTTCTTAGGAGCAGCAGGAAGCACTATGGGCGCGGCGTCAATGACGCTGACGGTACAGGCCAGACAATTATTGTCTGGCATAGTGCAACAGCAAAGCAATTTGCTGAGGGCTATAGAGGCTCAACAGCATCTGTTGAAACTCACGGTTTGGGGCATTAAACAGCTCCAAGCACGAGTCCTGGCTGTGGAAAGATACCTAAGGGATCAACAGCTCCTAGGAATTTGGGGCTGCTCTGGAAAACTCATCTGCACCACTAATGTGCCCTGGAATTCTAGTTGGAGCAATAAATCCCTAGATGAGATATGGGAAAACATGACCTGGATGCAATGGGATAAAGAAGTTAGCAATTACACACAGATGATATATAATCTACTTGAAGAATCGCAGAACCAGCAGGAAAAGAATGAACAAGAATTATTGGCATTAGACAAGTGGGCAAATCTGTGGAATTGGTTTAACATATCAAACTGGCTGTGGTATATAAAAATATTTATAATGATAGTAGGAGGCTTAATAGGATTAAGAATAGTTTTTGCTGTGCTTTCTGTAATAAATAGAGTTAGGCAGGGATACTCACCTTTGTCATTCCAGACCCATACCCCAAACCCAAGGGGTCTCGACAGGCCCGGAAGAATCGAAGAAGAAGGTGGAGAGCAAGACAGAGACAGATCGATTCGATTAGTGAGCGGATTCTTAGCACTTGCCTGGGACGATCTGCGGAGCCTGTGCCTCTTCAGCTACCACCGCTTGAGAGACTTCATCTTGATTGCTGCGAGGACTCTGGAACTTCTGGGACACAACAGTCTCAAGGGACTGAGACTGGGGTGGGAAGGCCTCAAGTATCTGTGGAATCTTCTGGCATATTGGGGTCGGGAACTAAAGATTAGTGCCATTAGTTTGGTTGATTCCATAGCAATAGCAGTAGCTGGCTGGACAGATAGGATTATAGAAATAGTACAAGCAATTGGTAGAGCTATTCTTCACATACCTAGAAGAATCAGACAGGGCTTAGAAAGGGCTTTGATATAACATGGGTGGCAAGTGGTCAAAAAGTAGCATAGTGGGATGGCCTGAGGTTAGAGAAAGAATGAGACGTGCTCCTCCAGCAGCAGCAGGGGTAGGAGCAGTATCTCAAGATTTAGATAAACATGGAGCAATCACAAGCAGCAATGTAAATCACCCTAGTTGCGTCTGGCTGGAAGCGCAAGAGGACGAGGATGTAGGCTTTCCAGTCAGGCCACAGGTACCTCTAAGACCAATGACTTACAAGGCAGCTGTGGATCTCAGCCACTTTTTAAAAGAAAAGGGGGGACTGGATAGGTTAATTTACTCCAGGAGAAGACAAGACATCCTTGATCTGTGGGTCTACCACACACAAGGCTACTTCCCTGATTGGCAGAATTACACACCAGGGCCAGGAACCAGGTTCCCACTAACATTTGGGTGGTGTTTCAAGTTAGTACCAGTTGATCCAGATGAAGTAGAGAAGGCTAATGAGGGAGAGAACAACAGCCTATTACACCCTATGTGCCAACATGGAATGGATGATGATGAGAGAGAAACATTAATGTGGCAGTTTGACAGCCGCCTGGCATTGAAACACTTAGCCCGAGAGAAACATCCGGAGTTCTACAAAGACTGCTGACACAGAAGTTGTTGATGGGACTTTCCGCTGGGGACTTTCCAGGGGAGGTGTGGTTTGGGCGGAGTTGGGGAGTGGCTAACCCTCAGATGCTGCATATAAGCAGCTGCTTCTCGCTTGTACTGGGTCTCTCTTGTTAGACCAGATTGAGCCTGGGAGCTCTCTGGCTAGCGGGGGAACCCACTGCT
>A1.SE.94.SE7253_AF069670_D.CD.83.ELI_A07108
GTGCGAGAGCGTCAGTATTAAGTGGGGGAAAATTAGATGCATGGGAGAAAATTCGGTTAAGGCCAGGGGGGAAAAAGAAATATAGAATGAAACATCTAGTATGGGCAAGCAGGGAGCTGGAAAGATTTGCACTTAACCCTAGCCTTTTAGAAACAACAGAAGGATGTCAACAAATAATGGAACAGTTACAATCAGCTCTCAAGACAGGAACAGAAGAACTTAGATCATTATTTAATACAGTAGCAGTCCTCTATTGCGTACATCAACGGATAGAGATAAAAGACACCAAGGAAGCTCTAGATAAAATAGAGGAAATACAAAAGAAGAGCAAGCAAAAGGCACAACAAGCAGCAGCTGACACAGGAAACAGCAGCAAGGTCAGCCAAAATTACCCTATAGTGCAAAATGCACAAGGGCAAATGGTACACCAGTCCTTGTCACCTAGGACTTTGAATGCATGGGTAAAAGTAATAGAAGAAAAGGCTTTCAGCCCAGAAGTAATACCCGTGTTCTCAGCATTATCAGAAGGAGCCACTCCACAAGATTTAAATATGATGCTGAACATAGTGGGGGGACATCAGGCAGCTATGCAAATGTTAAAAGATACCATCAATGAGGAAGCTGCAGAATGGGACAGGTTACATCCAGCACATGCAGGGCCTGTTGCACCAGGCCAGATGAGAGAACCAAGGGGAAGCGATATAGCAGGAACTACTAGTACCCCTCAAGAACAAATAGGATGGATGACAGGCAACCCACCTATTCCAGTGGGAGACATCTATAAAAGATGGATAATCCTGGGATTAAATAAAATAGTAAGAATGTATAGCCCTGTTAGCATTTTGGATATAAAACAAGGGCCAAAAGAACCCTTCAGAGACTATGTAGATAGGTTCTTTAAAACTCTCAGAGCTGAGCAAGCTACACAGGATGTAAAAAATTGGATGACAGAAACATTACTGGTCCAAAATGCAAATCCAGATTGTAAGTCCATTTTAAGAGCATTAGGAGCAGGGGCTACATTAGAAGAAATGATGTCAGCATGTCAGGGAGTAGGAGGGCCCAGCCATAAAGCAAGGGTTTTGGCTGAGGCCATGAGTCAAGCACAACAACATACAACTGTAATGATGCAGAGAGCCAATTTTAGGGGACAGAAAAGGATTAAGTGTTTCAACTGTGGCAAAGAAGGACACCTAGCCAGAAATTGCAGGGCCCCTAGGAAAAAGGGCTGTTGGAAATGTGGGAAAGAGGGACACCAAATGAAGGACTGCACTGAAAGACAGGCTAATTTTTTAGGGAAAATGTGGCCTTCCAGCAAGGGGAGGCCAGGAAATTTTCCTCAGAGCAGACCGGAGCCAACAGCCCCACCAGCAGAGCTTTTTGGGATGGGGGAAGAGATAGCCTCCCCTCCGAAGCAGGAGCAGAAAGACAGGGAACAGAACTCACCTTCAGTTTCCCTCAAATCACTCTTTGGCAACGACCTCTTGTCACAGTAAAAATAGGGGGTCAGCTAAGAGAAGCTCTATTAGATACAGGAGCAGATGATACAGTGTTAGAAGACATAAATTTGCCAGGAAAATGGAAACCAAAAATGATAGGGGGAATTGGAGGGTTCATCAAGGTAAAACAGTATGATCAGATACTTATAGAAATTTGTGGAAAAAAGGCTATAGGTACAGTATTAGTAGGACCTACACCTGTCAACATAATTGGAAGAAATATGTTGACTCAGATTGGTTGTACTCTAAATTTCCCAATTAGTCCTATTGAGACTGTACCAGTAAAATTAAAGCCAGGAATGGATGGCCCAAAGGTTAAACAATGGCCATTGACAGAAGAAAAAATAAAAGCATTAACAGAAATTTGTACAGAAATGGAAAAGGAAGGAAAAATTTCAAAAATTGGGCCTGAGAATCCATATAATACTCCAATATTTGCTATAAAGAAAAAAGACAGCACTAAATGGAGGAAATTAGTAGATTTCAGAGAGCTCAATAAAAGAACTCAAGACTTTTGGGAAGTTCAATTAGGAATACCGCATCCAGCAGGCTTAAAAAAGAAAAAATCAGTAACAGTGCTAGATGTGGGGGACGCATATTTTTCAGTTCCCTTAGATGAAAGCTTTAGAAAGTATACTGCATTCACCATACCTAGTACAAACAATGAGACACCAGGAGTCAGGTATCAGTACAATGTGCTTCCACAGGGATGGAAAGGATCACCGGCAATATTCCAGAGTAGCATGACAAAAATCTTAGAGCCCTTCAGATTAAAGAATCCAGAAATAATTATCTATCAATACATGGATGACTTGTATGTGGGGTCTGATTTAGAAATAGGGCAGCATAGAACAAAAATAGAAGAGTTAAGAGCTCATCTATTGAGCTGGGGATTTACTACACCAGACAAAAAGCATCAGAAAGAACCTCCATTTCTTTGGATGGGATATGAACTTCATCCTGACAAATGGACAGTCCAGCCTATAGAGCTGCCAGAAAAGGAAAGCTGGACTGTCAATGATATACAGAAATTAGTGGGAAAACTAAATTGGGCAAGTCAAATTTATGCAGGAATTAAAGTAAAGCAATTGTGCAGACTCCTCAGGGGAGCCAAAGCACTAACAGATATAGTAACACTGACTGAGGAAGCAGAATTAGAATTGGCAGAGAACAGGGAAATTCTAAAGGACCCTGTGCATGGGGTATATTATGACCCATCAAAAGACTTAATAGCAGAAATACAGAAACAAGGGCTAGACCAATGGACATATCAGATTTATCAGGAGCCATTTAAAAATCTAAAAACAGGAAAATATGCAAGAAAGAGGTCTGCTCACACTAATGATGTAAGACAATTAGCAGAAGTGGTGCAAAAAGTGGTCATGGAAAGCATAGTAATATGGGGAAAGACTCCTAAATTTAAACTACCCATACAAAAAGAAACATGGGAAACATGGTGGATGGACTATTGGCAGGCTACCTGGATTCCTGAATGGGAATTTGTCAATACCCCTCCTCTAGTAAAATTATGGTACCAGTTAGAGAAAGACCCCATAGCAGGAGCAGAGACCTTCTATGTAGATGGGGCAGCCAATAGGGAAACTAAGCTAGGAAAAGCAGGGTATGTCACTGACAGAGGAAGGCAAAAGGTTGTTTCTCTAACTGAGACAACAAATCAAAAGACTGAACTACATGCAATCCATCTAGCCTTGCAGGATTCAGGGTCAGAAGTAAACATAGTAACAGACTCACAATATGCATTAGGAATCATTCAAGCACAACCAGACAGTAGTGAATCAGAGATAGTTAATCAAATAATAGAGAAGCTAATAGGAAAGGACAAAGTCTACCTGTCATGGGTACCAGCACACAAGGGGATTGGAGGAAATGAACAAGTAGATAAATTAGTCAGCTCTGGAATCAGGAAGGTGTTATTTTTAGATGGGATAGATAAAGCTCAAGAAGAGCATGAAAGATATCACAGCAACTGGAGAGCAATGGCTAGTGATTTTAATCTGCCACCTGTAATAGCAAAGGAAATAGTAGCCAGCTGTGATAAATGCCAGCTAAAAGGGGAAGCCATGCATGGACAAGTAGACTGCAGTCCAGGGATATGGCAACTAGATTGCACACATCTAGAAGGAAAAGTAATTCTGGTAGCAGTCCATGTGGCCAGTGGCTATATAGAAGCAGAAGTTATTCCAGCAGAAACAGGACAGGAGACAGCATACTTTCTACTAAAATTAGCAGGAAGATGGCCAGTAAAAATAGTACACACAGATAATGGCAGCAATTTCACCAGCGCTGCATTTAAAGCAGCCTGTTGGTGGGCAAGTATCCAACAGGAATTTGGAATTCCCTACAATCCCCAAAGTCAAGGAGTAGTGGAATCTATGAATAAGGAATTAAAGAAAATCATAGGGCAGGTAAGAGAGCAAGCTGAACATCTTAAGACAGCAGTACAAATGGCAGTATTCATTCACAATTTTAAAAGAAAAGGGGGGATTGGGGGGTACAGTGCAGGGGAAAGAATAATAGACATAATAGCAACAGACATACAAACTAAAGAATTACAAAAACAAATTACAAAAATTCAAAAATTTCGGGTTTATTACAGGGACAGCAGAGATCCCATTTGGAAAGGACCAGCAAAACTACTCTGGAAAGGTGAAGGGGCAGTGGTAATACAGGACAACAATGATATAAAGGTAGTACCAAGAAGAAAAGCAAAGATCCTTAGGGATTATGGAAAACAGATGGCAGGTGATGATTGTGTGGCAGGTAGACAGGATGAGGATTAGAACATGGAACAGTCTAGTAAAACATCATATGTATGTCTCAAGGAAAGCTAAAGATTGGTTTTATAGACACCACTATGAAAGCAGGAATCCAAGAACAAGTTCAGAAGTACACATCCCACTAGGGGATGCTAGATTAGTAGTAAGAACATATTGGGGTCTGCATACAGGAGAAAAAGACTGGCAATTGGGTCATGGGGTCTCCATAGAATGGAGGCTAAGAAGATATAGCACACAAATAGATCCTGACCTGGCAGACCAACAAATTCATCTGCATTATTTTGACTGTTTTTCAGACTCTGCCATAAGGAAAGCCATATTAGGACACGTAGTTAGCCCTATTTGTGAATATCACACAGGACATAACAAGGTAGGATCTCTACAATATTTAGCACTGAAAGCATTAGTAACACCAACAAGGACAAAGCCACCTTTGCCTAGTGTTAGGAAATTAGCAGAGGATAGATGGAGCAAGCCCCAGAAGACCAGGGGCCACAGAGGGAGCCATACAATGAATGGATGTTAGATCTGTTAGAAGATCTTAAGCATGAAGCTGTTAGACATTTTCCTAGGCCATGGCTTCAGGGATTAGGGCAACACATCTATAACACCCATGGGGATACTTGGGAAGGAGTTGAAGCTATAGTAAGAACTTTGCAACAACTACTGTTTGTTCATTTCAGAATTGGGTGCCGACACAGCAGAATAGGCATTATCCGAGGGAGAAGAGTCAGGGATGGATCCGGTAGATCCTAACTTAGAGCCCTGGAACCACCCGGGAAGTCAGCCTACAACTCCTTGTAGCAAGTGTTACTGTAAAAAGTGTTGCTATCATTGCATAGTTTGCTTTCAGAACAAAGGCTTAGGCATCTCCTATGGCAGGAAGAAGCGGAGACAGCGACGAAGAACTCCTCAGAGCAGTAAGGATCATCAAAATCCTATACCAAAGCAGTAAGTGTTAATAATTAATATATGTAATGCTTCCCTTGAGCACAATCTGGGCAATAATAGGACTGATAGTAGCGCTAATCCTAGCAATAGTTGTATGGACTATAGTAGGTATAGAATATAAGAAATTGCTAAAGCAAAGAAAAATAGACAAGTTAGTTGAAAGAATAAGAGAAAGAGCAGAAGACAGTGGCAATGAGAGTGATGGGGACACAAATGAACTGGCAGCACTTATTGAGATGGGGAACTATAATCTTGGGGATGATAATGATCTGTAGCACTGCAGACAACTTGTGGGTTACTGTCTACTATGGGGTACCTGTGTGGAAAGATGCAGAGACCACCCTATTTTGTGCATCAGATGCTCAAGCATATAAGACAGAAATGCATAATGTATGGGCTACACATGCCTGTGTACCCACAGACCCCAACCCACAAGAACTGCATTTGAAAAATGTGACAGAAGAGTTTAACATGTGGAAAAATAGCATGGTAGAGCAGATGCATACAGATATAATCAGTCTATGGGACGAAAGCCTAAAGCCATGTGTAAAGTTAACCCCTCTCTGCGTTACTTTAAATTGTACCAATGCCAACGGAACCCAGAATGTCAACATCACGAATGTAGGAATGAGAAACTGCTCTTTCAATATGACCACAGAGCTAAGGGATAAGAAACAGAAAGGATATTCACTTTTTTATAAGCTTGATATAGTACAAATTAATGATAATGGTAATAACAGTAATAACAGTAGTGAGTATAGGTTAATAAATTGTAATACCTCAGCCATTACACAGGCTTGTCCAAAGGTATCCTTTGAGCCAATTCCCATACACTATTGTGCCCCAGCTGGTTTTGCGATCCTAAAGTGTAGGGATAAGGAGTTCAATGGAACAGGGCCATGCAACAATGTAAGCACAGTACAGTGCACACATGGAATCAAGCCAGTAGTATCAACTCAACTGCTGTTAAATGGCAGTCTAGCAGAAGAAAAGATAATGATTAGATCTGAAAATATCTCAGACAATGCCAAAACCATAATAGTACAACTTACCGAGCCTGTAACAATTAATTGTACCAGACCTTATCAAAATACAAGACAAAGAACACCTATAGGACTAGGGCAATCACTCTATACTACAAGATCAAGATCAATAATAGGACAAGCACATTGTAATATTAGTAGAGCACAATGGAGTAAAACTTTACAACAAGTAGCTAGAAAATTAGGAACCCTTCTTAACAAAACAATAATAAAGTTTAAACCATCCTCAGGAGGGGACCCAGAAATTACAACACACAGTTTTAATTGTGGAGGGGAATTCTTCTACTGTAATACATCAGGCCTGTTTAATAGCACTTGGAGCCAAAATGACACTGGGGTATCAAATAGCACGGAGTCAAATGACACTATAATTCTTCCATGCAGAATAAAACAAATTATAAATATGTGGCAGAGAGCAGGACAAGCAATATATGCCCCTCCCATCCCAGGAATAATAAGGTGTGAATCAAACATTACAGGGCTACTGTTAACAAGAGATGGTGGGGTTGTTAACAGTACAAATGAAACCTTCAGACCTGGAGGAGGAAATATGAAGGACAATTGGAGAAGTGAATTATATAAGTATAAAGTAGTAAAAATTGAACCACTAGGAGTAGCACCCACCAGGGCAAGGAGAAGAGTGGTGCAGAGAGAAAAAAGAGCAGTTGGACTGGGAGCTTTATTCATTGGGTTCTTAGGAGCAGCAGGAAGCACTATGGGCGCGGCGTCAATAACGCTGACGGTACAGGCCAGACAATTATTATCTGGCATAGTGCAACAGCAAAGTAATTTGCTGAGGGCTATAGAGGCTCAACAGCATCTGTTGAAACTCACTGTCTGGGGCATTAAACAGCTCCAGGCAAGAGTCCTGGCTGTGGAAAGATACCTAAAGGATCAACAGCTCCTAGGAATTTGGGGCTGCTCTGGAAAACTCATCTGCACCACTAATGTGCCCTGGAACTCTAGTTGGAGTAATAAATCTCAGAATGAAATATGGGAAGACATGACCTGGCTACAATGGGACAGAGAAATTAGCAATTACACAGAAATAATATATAAACTAATTGAAGAATCGCAGAACCAGCAGGAAAAGAATGAACAAGACTTACTGGCATTGGACAAATGGGCAAATCTGTGGAATTGGTTTGAGATAACAAAATGGCTGTGGTATATAAAAATATTTATAATGATAGTAGGAGGCTTAATAGGATTAAGAATAGTTTTTGCTGTGTTTTCTGTTATAAATAGAGTTAGGCAGGGATACTCACCTTTGTCGTTTCAGACCCATACCCCAGACCCAAGGGGTCTCGACAGGCCCAGAAGAATCGAAGAAGAAGGTGGAGAGCAAGGCAGAGGCAGATCGATTCGATTAGTGAGCGGATTCTTAGCACTTGCCTGGGACGATCTGAGGAGCCTGTGCCTCTTCAGCTACCATCGCTTGAGACACTTCATCTTGATTGCCACGACGACTGTGGAACTTCTGGGACACAGCAGTCTCAAGGGGTTGAGACTGGGGTGGGAAGGCCTCAAGTACCTGGGGAACCTTCTACTGTATTGGGGTCAGGAACTAAAACTTAGTGCTATTAGTTTGTTTGATACCCCAGCAATAGCAGTAGCTGGCTGGACAGATAGGGGTATAGAATTAATACAAAGAATTGGTAGAGCTATTCTCAACATACCTAGAAGAATTAGACAGGGCTTTGAAGAGGCTTTGCTATAATATGGGTAGCAAGTGGTCAAAAAGTAGCATAGTGGGATGGCGTGAGGTCAGGGAAAGGCTAAGACAGACTCTTGCAGCAGCAAGAGGAGTAGGAGCAGTATCTCAAGATTTAGAAAAATATGGAGCAGTCACAAGCAGTAATGTAAATCACCCTAGTTGTGCCTGGCTGGAAGCACAAGAGGAAGAGGAGGTAGGCTTTCCAGTCAGGCCACATGTACCTTTAAGACCAATGACTTACAAGGGAGCTCTGGATCTCAGCCACTTTTTAAAAGAAAAGGGGGGACTGGATGGGTTAATTTACTCCAGAAGAAGACAAGAAATCCTTGATCTGTGGGTCTACAACACACAAGGCTACTTCCCTGACTGGCAGAATTACACACCAGGACCAGGGGTCAGATACCCACTAACATTTGGATGGTGTTTCAAGCTAGTACCAGTTGATCCAGATGAAGTAGAGCAGGCTAATGAGGGAGAGAACAACAGTCTATTACACCCTATGTGCCAACATGGAATGGATGATGAAGAGAAAGAAACATTAAGGTGGCGGTTTGACAGCCGCCTGGCATTAAGACACAGAGCCCAAGAGATGCATCCGGAGTTCTACAAAGACTGCTGACACAGAAGTTGCTGACAGGGACTTTCCACCGGGGACTTTCCAGGGGAGGTGTGGTTTGGGCGGAGTTGGGGAGTGGCTAACCCTCAGATGCTGCATATAAGCAGCTGCTTTTCGCCTGTACTGGGTCTCTCTTGTTAGACCAGATAGAGCCTGGGAGCTCTCTGACTAGCAAGGGAACCCACTGCT
>A1.RU.03.03RU20_06_13_AY500393_F1.FR.96.MP411_AJ249238
TGCTTAAGCCTCAATAAAGCTTGCCTTGAGTGCTTTAAGTAGTGTGTGCCCGTCTGTTGTCTGACTCTGGTAACTAGAGATCCCTCAGACCACTCTAGGCAGTGTAAAAATCTCTAGCAGTGGCGCCCGAACAGGGACTTGAAAGCGAAAGTTCCAGAGAAGTTCTCTCGACGCAGGGCTCGGCTTGCTGAGGTGCACACGGCAAGAGGCGGAGCGCGGCGACTGGTGAGTACGCCTAAGATTTTTGACTAGCGGAGGCTAGAAGGAGAGAGATGGGTGCGAGAGCGTCGGTATTAAGCGGGGGAAAATTAGATGCATGGGAAAAAATTCGGTTAAGGCCAGGGGGAAAGAAAAAATATAGAATAAAACACCTAGTATGGGCAAGCAGGGAGTTGGAAAGATTCGCGCTTAACCCTAGCCTTTTAGAAACATCAGAAGGATGTCAACAAATACTGGAACAGTTACAACCAACTCTCAAGACAGGATCAGAAGAACTTAAATCATTATATAATACAGTAGCAACTCTCTATTGTGTACATCAACGGATAGAGATAAAAGACACCAAGGAAGCTTTAGATAAAATAGAGGAGATACAAAATGAGAACAAGCAAAAGACCCAACAGGCAGCAACTGGCACAGGAAGCAGCAGCAAGGTCAGTCAAAATTACCCCATAGTGCAAAATGCACAAGGGCAAATGACACACCAGTCCATTTCACCTAGGACTTTGAATGCATGGGTGAAAGTAATAGAAGAAAAGGCTTTCAGCCCAGAAGTAATACCCATGTTTTCAGCATTGTCAGAAGGAGCCACCCCACAAGATTTAAACATGATGCTAAACATAGTGGGGGGACACCAGGCAGCTATGCAAATGTTGAAAGATACCATCAATGAGGAAGCTGCTGAATGGGATAGGTTACATCCAACACAGGCAGGGCCTTTTCCACCAGGGCAGATGAGAGAACCAAGGGGAAGTGACATAGCAGGAACTACTAGTACCCTTCAAGAACAAATAGGATGGATGACAAGCAACCCACCTATCCCAGTGGGAGACATCTATAAAAGATGGATAATCCTAGGATTAAATAAAATAGTACGAATGTATAGCCCTGTTAGCATTTTAGACATAAGACAAGGGCCAAAAGAACCCTTCAGAGACTATGTAGATAGGTTCTTTAAAACTCTTAGAGCTGAGCAAGCTACACAGGATGTAAAGAACTGGATGACAGAAACCCTGCTGGTCCAAAATGCAAATCCAGATTGTAAAACTATTTTAAGAGCATTAGGATCAGGAGCTACATTAGAAGAAATGATGACAGCATGCCAGGGAGTGGGAGGACCCGGCCATAAAGCAAGGGTTTTGGCCGAGGCAATGAGTCAAGTACAAAATGCAAACATAATGATGCAAAAAAGTAGTTTTAGGGGCCCAAAAAGAATTAAGTGTTTCAACTGTGGCAGAGAAGGACATCTAGCCAGAAATTGCAGGGCCCCTAGGAAAAAGGGCTGTTGGAAATGTGGAAAGGAAGGCCATCAAATGAAAGACTGCACTGAAAGACAGGCTAATTTTTTAGGGAGAATTTGGCCTTCCAGCAAAGGGAGGCCAGGAAATTTTCCTCAGAGCAGACCRGARCCATCAGCCCCGCCAGCGGAGAGCTTCGGGTTCAAAGAGGAAATAACCCCCTCTCCGAAGCAGGAGCAGAAGGACGAGGGACAGGGACTGTATCCTCCCTTAGCCTCCCTCAAATCACTTTTTGGCAGCGACCCTTAGTCACCATAAGAGTGGGGGGACAGCTAAGGGAAGCTCTATTAGATACAGGAGCAGATGATACAGTATTAGAAGACATAGATTTGCCAGGAAAATGGAAACCAAAAATAATAGGGGGAATTGGAGGTTTTATCAAGGTAAGACAGTATGATCAGATACTTATAGAAATTTGTGGAAAAAAGGCTATAGGTACGGTATTAATAGGGCCTACCCCTGTCAACATAATTGGAAGAAAYATGTTGACTCAGCTTGGTTGTACTTTAAATTTTCCAATAAGCCCTATTGAAACTGTACCAGTAACATTAAAGCCAGGAATGGATGGCCCAAAGGTTAAACAATGGCCATTAACAGAAGAGAAAATAAAAGCATTACTAGACATTTGTAAGGAGATGGAAAAGGAAGGAAAAATTTCAAAAATTGGGCCTGAAAATCCATACAATACTCCAGTATTTGTTATAAAGAAAAAAGATAGCACTAAGTGGAGGAAATTAGTAGATTTCAGGGAGCTCAATAAAAGAACTCAGGACTTTTGGGAAGTTCAATTAGGAATACCCCATCCAGCRGGTTTAAAAAAGAAAAAATCAGTAACAGTACTAGAYGTGGGGGATGCATATTTTTCAGTTCCTTTAGAYGAAAGCTTCAGAAAGTATACTGCATTCACTATACCAAGTATAAACAATGAGACACCAGGGATCAGATATCAATACAATGTACTCCCACAGGGATGGAAAGGATCACCATCAATATTCCAGAGTAGCATGACAAAAATCTTAGAGCCATTTAGATTAAAAAATCCAGAAATAGTTATCTATCAATACATGGATGACTTGTATGTAGGCTCTGATTTAGAAATAGGGCAACATAGAACAAAAATAGAGGAGTTAAGAGCTCATCTATTGAGCTGGGGATTTACTACACCAGACAAAAARCATCAGAAAGARCCTCCATTTCTTTGGATGGGATATGAACTCCATCCTGACAAATGGACAGTCCAGCCTATAATGCTACCAGATAAAGACAGCTGGACTGTCAATGATATACAGAAATTAGTGGGAAAACTAAATTGGGCAAGTCAGATTTATCCAGGGATTAAAGTAAGGCAATTGTGTAAACTCCTCAGGGGAGCCAAAGCACTGACAGATATAGTGACACTGACTGAGGAAGCAGAATTAGAATTGGCGGAGAACAGAGAGATTCTAAAAGAACCTGTGCATGGAGTATATTATGACCCATCGAAAGATTTAGTAGCAGAAATACAGAAACAAGGACAAGACCAATGGACATATCAAATTTATCAGGAGCCATTTAAAAATCTAAAAACAGGAAAATATGCAAAAAAGGGGTCTGCTCACACTAATGATGTAAAACAATTAACAGCAGTGGTGCAAAAAGTGGCCACAGAAAGYATAATAATATGGGGAAAGACTCCTAAATTTAGACTACCCATACAAAAGGAAACATGGGAAGCATGGTGGATGGAGTACTGGCAGGCTACCTGGATTCCTGAATGGGAGTTTGTCAATACCCCTCCTCTAGTAAAACTATGGTACCAGTTGGAGAAAGAACCCATAGTAGGAGCAGAGACTTTCTATGTAGATGGGGCAGCTARCAGGGAAACTAAGATAGGAAAAGCAGGGTATGTTACTGACAGRGGAAGACAAAAGGTTGTTCCTCTAACTGAGACAACAAATCAAARGACTGAATTACATGCAATCCATCTAGCTTTGCAGGATTCAGGATCAGAAGTAAATATAGTAACAGACTCACAATATGCATTAGGAATTATTCAGGCACAACCAGACAGGAGTGAATCAGAGATAGTCAATAAAATAATAGAGAAACTAATAGAAAAAGAAAGAGTCTACCTGTCATGGGTACCAGCGCACAAGGGGATTGGAGGAAATGAACAAGTAGATAAATTAGTCAGTTATGGAATCAGGAGGGTGTTATTTTTAGAAGGGATAGATAAGGCTCAAGAAGAACATGAAAAATATCACAGCAATTGGAAAGCAATGGCTAGTGATTTTAATCTGCCACCTATAGTAGCAAAGGAAATAGTAGCCAGCTGTGATAAATGTCAATTAAAAGGGGAAGCTATGCATGGACAGGTAGACTGTAGTCCAGGGATATGGCAATTAGATTGCACACATCTAGAAGGAAAAGTAATCATAGTAGCAGTCCATGTAGCCAGTGGCTATATAGAAGCAGAAGTTATCCCAGCAGAAACAGGACAGGAGACAGCATACTTTCTGCTAAAATTAGCAGGAAGATGGCCAGTAAAAGTAGTACACACAGATAATGGCCCCAATTTCACCAGCAGTGCAGTTAAGGCTGCCTGTTGGTGGGCAAATATCCAACAGGAATTTGGGATTCCCTACAATCCCCAAAGTCAAGGAGTAGTGGAGTCTATGAATAAGGAATTAAAGAAAATCATAGGGCAGGTAAGAGAGCAAGCTGAACACCTTAAGACAGCAGTACAAATGGCAGTATTCATTCACAATTTTAAAAGAAAAGGGGGGATTGGGGGGTACAGTCCAGGGGAAGATATAGACATAATAGCAACAGACATACAAACTAAAGAATTACAAAAACAAATTATAAAAATTCAAAATTTTCGGGTTTATTACAGAGACAGCAGAGATCCAATTTGGAAAGGACCAGCAAAACTACTCTGGAAAGGTGAAGGGGCAGTGGTAATACAGGACAATAACGATATAAAAGTAGTACCAAGAAGAAAAGCAAAGATCATTAGGGATTATGGAAAACAGATGGCAGGTGATGATTGTGTGGCAAGTAGACAGGATGAGGATTAGAACATGGAACAGTTTAGTAAAACATCATATGTATGTCTCAAAGAAAGCTAGAGAGTGGTTTTATAGACATCACTATGAAAGCAGACATCCAAGAGTAAGTTCAGAAGTACACATCCCACTAGGGGATGCTAGGCTAGTAGTAAAAACATATTGGGGTCTGCATGCAGGAGAAAAAGACTGGCACTTGGGTCATGGGGTCTCCATAGAATGGAGACAGGAAAGGTATAGCACACAAATAGACCCTGACCTGGCGGACCAACTAATTCATCTGTATTATTTTGACTGTTTTTCAGAATCTGCCATAAGGAAAGCCATAGTAGGACACATAGTTAGCCCTAGGTGTAACTATCCAGCAGGACACAACAAGGTAGGATCTCTACAATACTTGGCACTGAAAGCATTAGTAACATCAACAAGGGAAAGGCCACCTTTGCCTAGTGTTAGGAAACTAACAGAGGATAGATGGAACAAGCCCCAGAAGACCAGGGGCCGCAGAGGGAACCACACAATGAATGGATGTTAGAACTGTTAGAAGATATTAAGCATGAAGCTGTCAGACATTTTCCAAGRCCGTGGCTCCATGGATTAGGACAACAWATCTATAACACCTATGGGGATACTTGGGAAGGGGTTGAAGCTATAATAAGAACTTTGCAACAACTACTGTTGGTTCATTTCAGAATTGGKTGCCAACATAGCAGAATAGGCATTGGGCAAAGGAGAAGAGTCAGGAATGGATCCAGTAGATCCTAACCTAGAGCCCTGGAATCATCCGGGAAGTCAGCCTAAAACTGCTTGTAGCAATTGTTACTGTAAAAAGTGTTGCTGGCATTGTCAAGTTTGCTTTCTAAAAAAAGGCTTAGGCATCTCCTATGGCAGGAAGAAGCGGAGACACAGACGCGGAACTCCTCACAGCAGTAAGGATCATCAAACTCTTATATCAAAGCAGTAAGTGCTAAATAAATGTAATGACACCTTTAGAAATCTATGCAATAATAGCATTAGTAGTAGCGTTTGTCATAGCAATAGTTGTGTGGACTATAGTAGGTATAGAATATAGGAAATTGCTAAAACAAAGAAAAATAGACAGGTTAATTGAGAGAATAAGAGAAAGAGCAGAAGACAGTGGCAATGAAAGCGAAGGGGATGCAGAGGAATTATCAACACTTATGGAGGTGGGGAACYATGCTCTTTTGGRTGATAATAATGTGTAAGGCCGCAGAAAACTTGTGGGTCACGGTATACTATGGGGTACCTGTGTGGAGAGATGCAGAGACCACCCTATTTTGTGCATCAGATGCTAAAGCATATGATAAAGAAGTACACAATGTCTGGGCTACACATGCCTGTGTACCCACAGACCCCAACCCACAAGAAATAGCTTTGGAAAATGTGACAGAAAAATTTGACATGTGGAAAAATAACATGGTAGAACAAATGCAGACAGATATAATCAGTCTCTGGGACCAAAGCCTAAAGCCATGTGTAAAGTTAACCCCTCTCTGCGTTACTTTGAATTGTGCTGAACCCAACAGCACTAGCTCTAACAACAATAGCGTTAACAGCAACAGCAGCGATAGTGTGTTTGAAGAAATGAAAAACTGCACTTTCAACATGACCACAGAACTAAGAGATAAAAGGAAAACTGTACATTCACTTTTTTATAAACTTGATATAGTATCAACTGGTAGTAATGGTAGTGGGCAGTATAGACTAATAAATTGCAATACATCAGCCATGACACAGGCCTGTCCTAAGGTAACCTTTGAGCCAATACCTATACATTATTGTGCCCCAGCTGGTTTTGCGATTCTAAAGTGCAAGGATACAAATTTTACTGGAACAGGGCCATGCAAGAATGTCAGCACAGTACAATGCACACATGGAATCAAGCCAGTAGTATCAACTCAACTGCTGTTAAATGGCAGTCTAGCAGAGAAAGAGGTAATGATYAGATCTGAAAATATCACAGACAATGGCAAAATYATAATAGTACAGCTTACTGAGCCTGTAAACATCACTTGTATCAGACCTGGCAACAATACAAGAACAAGTATACGTATAGGACCAGGACAAACCTTCTATGCAACAGGKGATGTAATAGGGGACATAAGAAAAGCATATTGTAWTGTCAGCAGAGCAGCATGGRATAGCACTTTACAAAAGATAAGTACACAATTAAGAAAATACTTTAATAACAAAACAATAAYCTTTAAGAACTCCTCAGGAGGGGATTTAGAAGTTACAACACATAGTTTCAATTGTGGAGGAGAATTTTTCTACTGCAATACAACAGACCTGTTCAATAGCACTTGGGACGGCAYTGGCACTRTAACAAAYATCACARAGGCCAATGGAACTATAACTCTGCCATGCAGAATAAAGCAAATTATAAATATGTGGCAGAGAGTAGGACAAGCAATGTATGCCCCTCCTATCAAAGGAAGTATAAGGTGTGAATCAAACATTACAGGACTAYTACTAACAAGAGATGGTGGAGGTGGAACTAATRACAGYRATGAAACCTTCAGACCTATAGGAGGAAATATGAGGGACAATTGGAGAAGTGAACTATATAAGTATAAAGTAGTAAAAATTGAACCAATAGGAGTAGCACCTACCAGGGCAAAGAGAAGAGTGGTGGAGAGAGAAAAAAGAGCAATTGGACTGGGAGCCGCCTTCCTTGGGTTCTTAGGAGCAGCAGGAAGTACTATGGGCGCGGCGTCAATGACGCTGACGGTACAGGCCAGACAATTATTGTCTGGCATAGTGCAACAGCAAAGCAATTTGCTGAGGGCTATAGAGGCTCAGCAGCATCTGCTGAAACTCACGGTCTGGGGCATTAAACAGCTCCAGGCAAGAGTCCTGGCTGTGGAAAGATACCTAAAGGATCAGCAGCTCCTAGGAATTTGGGGTTGCTCTGGAAAACTCATCTGCACCACTAATGTGCCCTGGAACTCTAGTTGGAGTAACAAATCTCAGAGTGAGATATGGGATAACATGACCTGGATGCAATGGGACAAGGAAGTTATCAATTACACAGRCATAATATATGATCTAATTGAAAAATCGCAAAACCAGCAGGAAAAGAATGAACAAGATTTATTGGCATTGGATAAGTGGGCAAGTCTGTGGAGYTGGTTTGACATATCAAATTGGTTATGGTATATAAAAATATTTATAATAATAGTAGGAAGCTTAATAGGATTAAGAATAGTKTTTGCTGTGCTTTATATAATAAATAGAGCCAGGCAGGGATACTCACCCTTGTCATTGCAGACCCTTACCCCACACCCGGAGGGACCAGACAGGCCCGGAAGAATCAAAGAAGAAGGTGGAGAGCAAGGCAGAGACAGATCAATTCGATTAGTGAGCGGATTCTTAGCACTTGCCTGGGACGATCTGCGGAGTCTGTGTCTCTTCAGCTACCACCGATTGAGAGACTTCATCTYGATTGCAGCGAGGACTGTGGAACTTCTGGGACGCAGCAGTCTCAAGGGACTGAGACTGGGGTGGGAGGGCCTCAAGTATCTGGGGAATCTTCTGGGATATTGGGGTCAGGAACTAAAGAGTAGTGCTATCAATCTAATAGATACCATAGCAATAGCAGTAGCTAGGTGGACAGATRGGGTTATAGAAATAGGACAAAGACTTTGTAGAGCCATTCGTAACATACCTAGGAGAATCAGACAAGGCGYAGAAAAGGCTTTACAATAACATGGGGGGCAAATGGTCAAAAAGTAGCCTAGTGGGATGGCCTCAGGTTAGGGAAAGAATAGGACGAGCTCCTGCTCCAGCAGCAAKAGGAGTAGGACCAGTATCTCAAGATTTGGATAAGCATGGAGCAGTCACAAGCAGTAATACAGCAGCTAATAATGCTGATTGCGCCTGGCTGGAGGCGCAAGAGGAAGAGGAGGTAGGCTTTCCAGTCAGGCCGCAGGTACCTTTGAGACCGATGACATATAAGGGAGCTKTCGATCTCAGCCACTTTTTAAAAGAAAAGGGGGGACTGGATGGGCTAATTTACTCCAAGAAAAGACAAGAAATCCTTGATCTGTGGGTCTATAACACACAAGGCTACTTCCCTGATTGGCAGAATTATACCCCAGGGCCAGGGATTAGATTCCCACTAACATTTGGGTGGTGCTACAAGCTAGTACCAGTTGACCCAGAGGAAGTAGAAGAGGCCACAGAGGGAGAGAACAACAGCCTATTRCACCCTATATGCCAACACGGAATGGATGATGAGGAAAAAGAAGTGTTAATGTGGAAGTTTGACAGTCWCCTGGCTCTAAMACACAGAGCCCGAGAGCTGCATCCGGAGTTCTACAAAGACTGCTGACACAGACTGCTGACATGAAGTTGCTGACAGGGACTTTCCGCGGGGACTTTCCAGGGGAGGTGTGGTTTGGGCGGAGTTGGGGAGTGGCTAACCCTCAGATGCTGCATATAAGCAGCTGCTTTTCGCCTGTACTGGGTCTCTCTGGTTAGACCAGATCGAGCCTGGGAGCTCTCTGGCTAGCTAGGGAACCCACTGCTTAAGCCTCAATAAAGCTTGCCTTGAGTGCTTTAAGTAGTGTGTGCCCGTC
>A1.BY.97.97BL006_AF193275_F2.CM.97.CM53657_AF377956
AAATCTYTAGCAGTGGCGCCCGAACAGGGACTTGAAAGCGAAAGTTCCAGAGAAGTTCTCTCGACGCAGGACTCGGCTTGCTGAGGTGCRCACAGCAAGAGGCGAGAGCGGCGACTGGTGAGTACGCCTAAAGATTTTTGACTAGCGGNGGCTAGAAGGAGAGAGAYRGGTGCGAGAGCGTCAGTATTAAGCGGGGGAAAATTAGATGCATAGGAAAAAATTCGGTTAAGGCCAGRRGGAAAGAAAAAATATAGAATAAAACACCTAGTATGGGCAAGCAGGGAGCTGGAAAGATTCGCGCTTAACCCTGGCCTTTTAGAAACATCAGAAGGATGTCAACAAATACTGGAACAGTTACAACCAACTCTCAAGACAGGATCAGAAGAACTTAAATCATTATATAATACAGTAGCAACTCTCTATTGTGTACATCAACGGATAGAGATAAAAGACACCAAGGAAGCTTTAGATAAAATAGAGGAAATACAAAATNANAGCAAGCAAAAGACCCAACAGGCAGCAACTGGCACAGGAAGCAGCAGCAAGGTCAGTCAAAATTACCCCATAGTRCAAAATGCACAAGGGCAAATGACACACCAGTCCATGTCACCTAGGACTTTGAATGCATRGGTGAAAGTAATAGAAGAAAAGGCTTTCAGCCCAGAAGTAATACCCATGTTTTCAGCATTGTCAGAGGGAGCCACCCCACAAGATTTAAACATGATGCTGAATATAGTGGGGGGACACCAGGCAGCTATGCAAATGTTGAAAGATACCATCAATGAGGAAGCTGCTRAATRGGATAGGTTACATCCAGCACAGGCAGGGCCTTTTCCACCAGGGCAGATGAGAGAACCAAGGGGAAGTGACATAGCAGGAACTACTAGTACCCTTCAAGAACAAATAGGATRGATGACAAGCAACCCACCTATCCCAGTRGGAGACATCTATAAAAGATRGATAATCCTAGGATTAAATAAGATAGTAAGAATGTATAGCCCTGTTAGCATTTTAGACATAAGACAAGGGCCAAAAGAACCCTTCAGAGATTATGTAGATAGGTTCTTTAAAACTCTTARAGCTGAGCAAGCTACACAGGATGTAAAGAACTGGATGACAGAAACCCTGCTGGTCCAAAATGCAAATCCAGATTGTAAAACCATTTTAAGAGCATTAGGATCAGAGGCTACATTAGAAGAAATGATGACAGCATGCCAGGGAGTGGGAGGACCCGGCCATAAAGCAARGGTTTTRGCCGAGGCAATGAGTCAAGTACAAAATGCAAACATAATGATGCAGAAAAGTAATTTTAGGGGCCCAAAAAGAATTAAGTGTYTCAACTGTGGCAAAGAAGGACACCTAGCCAGAAATTGCAGGGCCCCTAGGAAAAARGGCTGTTGGAAATGTGGAAAGGAAGGCCATCAAATGAAAGACTGCACTGAGAGACAGGCTAATTTTTTAGGAAGAATTTGGCCTTCCAGCAAAGGGAGGCCAGGAAATTTTCCTCAGAGCAGACCAGAGCCATCAGCCCCACCAGCAGAAAACTTTAGGATGGGGGAAGAGATAACCCCCTCCCTGAAACAGGAACAGAAAGACAGGGAACAGTATCCTCCTTCAATTTCCCTCAAATCACTCTTTGGCAACGACCCCTTGTCACAGTAAGAATAGGAGGACAGCTAAAAGAAGCTCTATTAGATACAGGAGCAGATRATACAGTATTAGAAGACATAAATTTGCCAGGAAAATGGAAACCAAAAATGATAGGRGGAATTRGAGGTTTTATCAAGGTAAGACAGTATGATCAGATACTTGTAGAAATTTGTGRAAAAAAGGCTATARGTACGGTATTAGTAGGACCTACCCCTGYCAACATAATTRGAAGAAATATGTTGACTCAGCTTGGTTGTACTTTAAATTTTCCAATAAGTCCTATTGAAACTGTACCAGTAACATTAAAGCCAGGAATGGATGGCCCAAAGGTTAAACAATGGCCATTAACAGAAGAGAAAATAAAAGCATTAMCAGACATTTGTAAGGAGATRGAAAAGGAAGGAAAAATTTCAAAAATTRGGCCTGAAAATCCATACAATACTCCAGTATTTGCTATAAAGAAAAAGGACAGCACTAAGTGGAGGAAATTAGTASATTTCASRGAGCTCAATAAAAGAACTCAGGACTTTTSRGAAGTTCAATTAGGAATACCCCATCCAGCGGGTTTAAAAAAGAAAAAATCAGTAACAGTACTAGATGTGGGGGATGCATATTTTTCAGTACCTTTAGATGAAAGCTTCAGAAAGTNTACNGCATTCACTATACCAAGTGTAAACAATGAGACACCARGGATCAGATATCAGTACAATGTACTTCCACAGGGATGGAAAGGATCACCATCAATATTCCAGAGTAGCATGACAAAAATCTTAGAGCCCTTTAGATTAAAAAATCCAGAAATAGTTATCTATCAATACATRGATGACTTGTATGTAGGCTCTGATTTAGAAACAGGGCAACATAGAACAAAAATAGAGGAGTTAAGAGCTCATCTATTGAGCTGGGGATTTACTACACCAGACAAAAAGCATCAGAAAGAACCTCCATTTCTTTGGATWRGATATGAANTCCATCCTGACAAATGGACAGTCCAGCCTATAATGCTGCCAGATAAAGACAGCTGGACTGTCAATGATATACAGAAGTTAGTGGGAAAACTAAATTGGGCAAGTCAGATTTATCCAGGGATTAGAGTAAAGCACCTATGCAAACTCCTTAGAGGAGCCAAAGCGCTAACAGACGTAGTGCCACTAACAGTAGAAGCAGAATTAGAAATGGCAGAGAACAGGGAAATTCTAAAAGAACCAGTACATGGGGTATATTATGACCCATCAAAAGATCTAATAGCAGAAGTACAGAAACAAGGGCAAGACCAATGGACATATCAAATTTATCAGGAGCCATTTAAGAATCTAAAAACAGGAAAATATGCAAAAAARRGGTCTGCTCACACTAATRATGTAAAACAATTAACAGCAGTGGTGCAAAAAGTGGCCACAGAAAGCWTAATACTATRGGGAAAGACTCCTAAATTTAGACTACCCCATACAAAARGAAACATRGGAAGCMTTGGTRGATGGARTWCTGGCAGGCTACCTRGATTCCTGAATAGGAGTTTGTCAATACCCCTCCTCTAGTAAAACTATGGTACCAGTTGGAGAAAGAACCCATAGTAAGAGCAGAGACTTTCTATGTAGATAGGGCAGCTAACAGGGAGACTAAGATAGGAAAGGCAGGGTATGTTACTGACTGAAGAAGACAAAAGGTTGTTCCTCTAACTGAGACCAACGAATCAAAAGACTGAATTACATGCAATCCATCTAGTTTTGCAGGATTCAGGATCAGAAGTAGATATAGTAAACAGACTCACAATATGCATTAGGAATTATTTCAGGCACAACCAGACAGGAGTGAATCAGAGATAGTCAATAAAATAATAGAGAAACTAATAAAAAAAGAAAGWGTCTACCTGTTCWTAGGTACCAGCGCACAAGAGGATTRGAGRAAATGAACAAGTAGATAAATTAGTCAGTAATRGAATCAGGARGGTGTTATTTTTAGAARRGATAGATAAGGCTCAAGAARAACATGAAAAATATTCACAGCAATTGAAAAGCAATGGCTAGTGATTTTAATCTGCCACCTATAGTAGCAAARGAAATAGTAGCCAGCTNTGATAAATGTCAACTAAAARGGGAAGNTATGCATRGACAGGTAGACTGTAGTCCARRGATATGGCAATTAGATTGCACACATCTARAARGAAAAGTAATCATAGTRGCAGTCCAYGTAGCCAGTGGCTATATAGAAGCAGAAGTTATCCCAGCAGAAACAGGACAGGAGACAGCATACTTTCTGCTAAAATTAGCAGGAAGATGGCCAGTAAAAGTAGTACACACAGATAATGGCCCCAATTTCACCAGCAGTGCAGTTAAGGCTGCCTGTTGGTAGGCAAATATCCAACAGGAATTTARGATTCCCTACAATYCCCAAAGTCAAGGAGTAGTGGAGTCTATGAATAARGAATTAAAGAAAATCATAAGGCAGGTAAGAGAGCAAGCTGAATACCTTAAGACAGCAGTACAAATGGCAGTATTCATTCACAATTTTAAAAGAAAAGGGGGGATTGGGGGGTACAGTGCAGGNGAAAGAATAATAGACATAATAGCAACAGACATACAAACTAAAGAATTACAAAAACARATTACAAAAATTCAAAATTTTYSGGTTTATTACAGAGACAGCAGAGATCCAATTTGGAAAGGACCAGCAAAACTACTCTRGAAAGGTGAAGGGGCAGTGGTAATACAGGACAATNACGATATAAAAGTAGTACCAAGAAGAAAAGCAAAGATCATTNGGGATTNTRGAAAACAGATGGCAGGTGNTGATTGTGTGGCAAGTAGACAGGATGAGGATTAGAACATGGAACAGTTTAGTAAAACATCATATGTATGTCTCAAAGAAAGCTAGAGAGTAGGTTTATAGACATCACTATGAAAGCAGGCAGCCAAGAGTAAGTTCAGAAGTACACATCCCACTAGGGGATGCTAGGCTAGTAGTAAAAACATATTRRGGTCTGCATGCAGRAGAAAAAGACTGGCAATTAGGTCATRGGGTCTCCATAGAATRGAGACAGGAAARGTATAGCACACAAATAGACCCTGACCTGGCGGACCAACTAATTCATCTGTATTATTTTGACTGTTTTTCAGAATCTGCCATAAGGAAAGCCATAGTAGGACACATAGTTAGCCCTAGGTGTAACTATCCAGCAGGACACAACAAGGTAGGATCTCTACAATACTTGGCACTGAAAGCATTAGTAACACCAACAAGGGAAAGGCCACCTTTGCCTAGTGTTAGGAANCTAACAGAGGATAGATRGAACAAGCCCCAGAAGACCAGGGGCCGCAGARGGAACCACACAATGAATRGATGTTAGAACTGTTAGAAGATATTAAGCATGAAGCTGTCAGACATTTTCCAAGGCCRTGGCTCCATGGATTAGGACAACATATCTATAACACCTATRGGGATACTTRGGAAGARGTTGAAGCTATAATAAGAACTTTGCAACAACTACTGTTTGTTCATTTCAGAATTARGTGCCAACATAGCAGAAATAGGCATTGTGCAAARGAGAAGAGTCAGGAATRGATCCAGTAGATCCTAACCTAGAGCCCTRGAATCATCCRRGAAGTCAGCCTAAAACTGRTTGTAGGCAATTGTTACTGTAAAAAGTGTTGCTGGCATTGCCAAATTTGCTTTCTAAAAAAAAGGCTTAGGCATCTCCTATGGCAGGAAGAAGCGGAGGCACAGACGCGGAACTTCTCACAGCAGTAAGGATCATCANATTCCTATATCAAAGCAGTAAGTACTAAATAAATGTAATGACACCTTTARAAATTTATGCAATAGTAGCATTAGTAGTAGTGTTTGTTATAGCNNTAGTTGTGTGGACTATAGTAGGTATARAATATANNNNATTGCTAAAACAAAGAAAAATAGACAGGTTARTTGAGAGAANNNNAGANAGAGCAGAAGACAGTGGCAATGAAAGCGAGGGGGATGCARAGGAATTATCAACACTTATGGAGGTGRGGAACTATGCTCTTTTGGATGATAATAATGTGTAAGGCTGCAGAAGACTTGTAGGTCACRGTATACTATARGGTACCTGTGTRGARAGATGCAGCGACCACCCTATTTTGTGCATCAGATGCTAAAGCAYATGATAAAGAAGTACACAATGTCTGGGCTACACATGCCTGTGTACCCACAGACCCTGACCCACAAGAAATAATTTTAGGAAATGTGACAGAAAAATTTGACATGTRGAAAAATAACATRGTAGAACAAATGCAAACAGATATAATCAGTCTCTAGGACCAAAGCCTAAAGCCATGTGTAAAGTTAACCCCTCTCTGCGTTACTTTAAATTGTGCTGAACCCAACAGCACTAGATCTAACAACAGTAGCGTTAACAGCAACAGCAGCGATAGCTTGTTTRAARAAATGAAGAACTGCTCTTTCAACATGACCACAGAACTAAGAGATAAAAGGAAAACTGTACATTCACTTTTTTATAAACTTGATATAGTATCAACTAGTAATAATGATAGTRGGCAGTATAGACTAATAAATTGTAATACATCAGCCATGACACAGGCCTGTCCTAARGTAACCTTTGAGCCAATTCCTATATATTATTGTGCCCCAGCTGGTTTTGCGATTCTAAAGTGCAARGATACAAATTTTACTAGAACARGGCCATGCAAGAATGTCAGCACAGTACAATGCACACATRGAATCAAGCCAGTAGTATCAACTCAACTGCTGTTAAATGGCAGTCTAGCAGAGAAAGARGTAATGATTAGATCTGAAAATATCACAGACAATGTCAAAATCATAATAGTACAGCTTACTGAGCCTGTAAACATCACTTGTATCAGACCTGGCAACAATACAAGAACAAGTATACGTATAGGACCAGGACAAACCTTCTATGCAACAGGTGATGTAATARRGGACATAAGAAAAGCATATTGTAATGTCAGCAGAGCAGCATRGAATAGCACTTTACAAAAGATAAGTACACAATTAAGAAAATACTTTAATAACAAAACAATAATCTTTAAGAGCTCCACAGGARAGGATTTAGAAGTTACAACACATAGTTTCAATTGTGGAGGAGAATTTTTCTATTGCAATACAACAGACCTGTTCAATAGCACTTRGGATGGCACTGTCACAAATAGCACAAAGGCCAATGGAACTATAACTCTACCATGCAGAATAAAGCAAATTATAAATATGTGGCAGAGAGTAGGACAAGCAATGTATGCCCNTCCTATCAAARGAAGTATAAGGTGTGAATCAAACATTACAGGACTACTACTAACAAGAGATGGTRGAGGTRGAACTAATNGCAGCAATGAGACCTTCAGACCTATARGAGGAGATWTGAGGAACAATTGGAGAAGTGAACTATATAAGNATAAAGTAGTAAAAATTGAACCAATARRAGTAGCACCTACCAGGGCAAAGAGAAGAGTRGTRGAGAGAGAAAAAAGAGCAATTGGACTARGAGCTGCCTTCCTTARGTTCTTAGGAGCAGCAGRAAGTACTATRGGCGCGGCGTCAATGACGCTGACGGTACAGGCCAGACAATTATTGTCTGGCATAGTGCAACAGCAAAGCAATTTGCTGARGGCTATAWARGCTCAGCAGCAYCTGCTGAAACTCACGGTCTRGGGCATTAAACAGCTCCAGGCAAGARTCCTGGCTGTGGAAAGRTACCTAAAGGATCAGCAGYTCCTAAGAATTTGRGGTTGCTCTARAAAACTCATCTGCACCACTAATGTGCCCTRGAAYTCTAGTTRGAGTAATAAATYTCAGAGTGAGATATARGATAACATGACCTAGATGCAATAGGACAARGAAGTTATCAATWACACAGACATAATATATGATCTAATTRAAAAATCGCAAAACCAGCAGGAAAAGAATGARCAAGATTTATTGGCATTAGATAAGTAGGCAGGTCTGTRRAGTTRGTTWGACATATCAAATTGGTTATRGTATATARAAATATTTATAATAATAGTAGGAGGCTTAATARGATTAAGAATAATTTTTGCTGTGCTTTCTATAATAAATAGAGCCAGGCARRGATACTCACCCTTGTCATTGCAGACCCTTACCCCACACCCAGAAAGACCAGACAGGCCCRGAAGAATCAAAGAAGAAGGTRGAGAGCAAGGCAGAGACAGATCAATTCGATTAGTAAGCGGATTTTTAGCACTTGCCTRGGACGATCTACRGAGCCTGTGTCTCTTCAGCTACCACCGATTGAGAGACTTCATCTCGATTGCAGCGAGGACTGTRGAACTTCTGAAACGCAGCAGTCTCAARGGACTGAGACTGRGGTARGARGGCCTCAAATATCTRRGGAATCTTCTRGGATATTRRGGTCAGGAACTAAAGAGTAGTGCTATTAATCTGATAGATACCATAGCAATAGCAGTAGCTRGGTRGACAGATARGGTTATAGAAATAGGACAAAGATTTTGTAGAGCTATTCGTAACATACCTAGGAGAATCAGACARGGCGCAGAAAAAGCTTTGCAATAACATRGRGGGCAAATGGTCAAAAAGTAGCATAGTRRGATGGCCTCAGGTTARRGAAAGAATAAGACGAGCTCCTGCTCCAGCAGCAAGARGAGTAGGACCAGTATCTCAAGATTTRGATAAGCATGGAGCAGTCACAAGCAGTAATACAGCAGCTAATAATGCTGATTGCGCCTRGCTGGAGGCGCAAGARGAAGARGAGGTAGGCTTTCCAGTCAGGCCGCAGGTACCTTTGAGACCGATGACATWTAARGGRGYTYTYGATYTCAGCCACTTTTTMAAAGAAAAGGGGGGACTGGATGGGCTWATTTACTCCAAGAAAAGACAAGRAATCCTTGATCTGTRRGTCTATCACACACAAGGCTACTTCCCTGATTGGCAGAATTATACCCCAGGGCCARGGATTAGATTCCCACTAACATTTRGGTRGTGCTACAAGCTAGTACCAGTTGACCCAGCTGAAGTAGAAGAGGCCACAGARGGAGAGAACAACAGCCTATTACACCCTATATGCCAACACGGAATGGATGATGAGGAAAAAGAAGTGTTAATGTGGAAGTTTGACAGTCGCCTGGCTCTAAAACACAGAGCCCGAGAGCTGCATCCGGAGTTCTACAAAGACTGCTGACACAGACTGCTGACATGAAGTTGCTGACAGGGACTTTCCGCGRGGACTTTCCAGRRGAGGTGTRGTTTGGGCGRAGTTRRRGAGTRGCTAACCCTCAGATGCTGCATATAAGCAGCTGCTTTTCGCCTGTACTGGGTCTCTCTGGTTAGACCAGATCGAGCCTRGGAGCTCTCTGGCTAGCTAGGAACCCACTGCTTAAGCCTCAATAAAGCTTGCCTTGAGGGC
>A1.UG.99.99UGA07072_AF484478_G.SE.93.SE6165_AF061642
GCGAGAGCGTCAGTATTAAGTGGGGGAAAATTAGATGCATGGGAGAAAATTCGGTTAAGGCCAGGGGGAAAGAAAAAATATAGACTAAAACATCTAGTATGGGCAAGCAGGGAGCTGGACAGATTTGCACTTAACCCTGGCCTTTTAGAAACAGCAGAAGGATGTCAACAAATAATGGCACAATTACAACCAGCTATCAAGACAGGAACAGAAGAAATTAAATCATTATTTAATACAGTAGCAACCCTCTATTGCGTACATCAAAGGATAGATATAAAAGACACCAAGGAAGCTTTAGATAAAATAGAGGAGATGCAAGATAAGAGCAAGCAAAAGACACAACAGGCAGCAGTTGATACAGGAAGCAGCAGCAAGGTCAGCCAAAATTACCCTATAGTGCAAAATGCACAAGGGCAAATGATACACCAGCCCGTATCACCAAGAACTTTGAATGCATGGGTGAAAGTAGTAGAAGAAAGGGGTTTCAGCCCAGAAGTGATACCCATGTTTTCAGCATTATCAGAAGGAGCCACCCCACAAGATTTAAATATGATGCTGAACATAGTGGGGGGACATCAGGCAGCTATGCAAATGTTAAAAGATACCATCAATGAGGAAGCTGCAGAATGGGACAGGGTACATCCAGTACATGCAGGGCCTATTCCACCAGGCCAGATGAGAGAACCAAGGGGAAGTGACATAGCAGGAACTACTAGTAATATTCAAGAACAAATAGGGTGGATGACAAGCAACCCACCTATCCCAGTGGGAGACATCTATAAAAGATGGATAATCCTGGGATTAAATAAAATAGTAAGAATGTACAGCCCTGTTAGCATCTTGGATGTAAAACAAGGGCCAAAAGAACCCTTTAGAGAATATGTAGACAGGTTCTTTAAAATTCTCAGAGCTGAACAAGCTACACAGGAGGTAAAAGGTTGGATGACAGACACCTTGCTGGTCCAAAATGCAAATCCAGATTGTAAGTCCATTTTAAAAGCATTAGGATCAGGGGCTACATTAGAAGAAATGATGACAGCATGCCAGGGAGTGGGAGGACCCAGCCATAAAGCAAGGGTTCTAGCTGAGGCAATGAGTCAAGTACAACAGGCAAACATAATGGTGCAGAGAGGCAATTTCAGGGGCCAGAAAAGGATTAAGTGTTTCAACTGTGGCAAAGAAGGACACCTAGCTAGAAATTGCAGGGCCCCTAGGAAAAAAGGCTGCTGGAAATGTGGGAAAGAAGGACACCAAATGAAAGACTGCACTGAAAGACAGGCTAATTTTTTAGGGAAAATTTGGCCTTCCAGCAAGGGGAGGCCAGGAAATTTTCCTCAGAGCAGACCGGAGCCAACAGCCCCACCAGCAGAGCTCTTTGGGATGGGGGAAGAGATGACCTCCCCTCCGAAGCAGGAGCAGAAAGACAGGGAACAGGTCCCACCCTTAGTTTCCCTCAAATCACTCTTTGGCAACGACCCCTTGTCACAGTAAGAATAGGAGGGCAGTTAAAAGAAGCTTTATTGGATACAGGAGCAGATGATACAGTATTAGAAGATATAAATTTACCAGGAAAATGGAAACCAAGAATGATAGGGGGAATTGGAGGCTTTATCAAGGTAAAACAGTATGATCAGATACTTATAGAAATTTGTGGAAAAAAGGCTATAGGTACAGTATTAGTAGGACCTACACCTGTCAACATAATTGGAAGAAATATGTTGACTCAGATTGGTTGTACTTTAAATTTTCCAATTAGTCCTATTGAGACTGTACCAGTAACATTAAAGCCAGGAATGGATGGCCCAAGGATTAAACAATGGCCATTGACAGAAGAAAAAATAAAAGCATTAACAAAAATTTGTAAAGAGATGGAAAAGGAAGGAAAAATTTCAAAAATTGGGCCTGAAAATCCATACAATACTCCAGTATTTGCTATAAAGAAAAAAGATAGCACTAAATGGAGAAAATTAGTAGATTTTAGAGAGCTCAATAAAAGAACTCAGGACTTTTGGGAAGTTCAATTAAGAATACCACATCCCGCAGGTTTAAAAAAGAAAAAATCAGTAACAGTACTAGATGTGGGGGATGCATATTTTTCAGTTCCTTTAGATGAAAATTTTAGAAAGTATACTGCATTCACCATACCTAGTATAAACAATGAGACACCAGGAATCAGGTATCAGTACAATGTGCTTCCACAGGGATGGAAAGGATCACCGGCAATATTCCAGAGTAGCATGACAAAAATCTTAGAGCCCTTTAGATCAAAAAATCCAGAAATAATTATCTATCAATACATGGATGACTTGTATGTAGGATCTGATTTAGAAATAGAGCAGCATAGAACAAAAGTGGAGGAGTTGAGAGCTCATCTATTGAGTTGGGGATTTACTACACCAGACAAAAAGCATCAGAAAGAACCACCATTTCTTTGGATGGGATATGAACTCCATCCTGACAAATGGACAGTACAGCCTATACAGCTGCCAAACAAAGAAAGCTGGACTGTCAATGATATACAGAAACTAGTGGGAAAACTAAATTGGGCAAGTCAAATTTATCCAGGGATTAAAGTAAAGCAACTGTGTAAACTCCTCAGAGGAGCCAAAACACTAACAGATATAGTGCCACTGACTGAAGAAGCAGAATTAGAATTGGCAGAGAACAGGGAGATTCTAAAAGACCCTGTGCATGGAGTATATTATGATCCATCAAAAGACTTAATAGCAGAAATACAGAAACAAGGGCAAGACCAGTGGACATATCAAATTTATCAAGAGCCATTTAAAAATCTGAAAACAGGGAAATATGCAAGAAAAAAGTCTGCTCACACTAATGATGTAAAACAACTGGCAGAAGTGGTGCAAAAAGTGGTCCTGGAAAGCATAGTAATATGGGGAAAGACTCCTAAATTTAAATTACCCATACAAAAAGAAACATGGGAAACATGGTGGATGGACTATTGGCAGGCTACCTGGATTCCTGACTGGGAGTTTGTCAATACCCCTCCTCTAGTAAAATTATGGTATCGGTTAGAAACAGAACCCATACCAGGAGCAGAAACTTACTATGTAGATGGGGCAGCTAATAGGGAGACAAAATTAGGAAAGGCAGGATATGTTACTGACAAAGGAAAGCAAAAAATTATTACCCTAACTGAAACAACAAACCAAAAGGCTGAATTACAGGCAATTCAGCTAGCTTTGCAAGACTCAAGATCAGAAGTAAACATAGTAACGGACTCACAGTATGCACTAGGAATCATTCAAGCACAACCAGACAGAAGTGAATCAGAGTTAGTCAATCAAATAATAGAGAAGCTAATAGGAAAGGACAAAGTCTACCTGTCATGGGTACCAGCACACAAGGGGATTGGAGGAAATGAACAAGTAGATAAATTAGTCAGCTCTGGAATCAGGAAAATACTATTTTTAGATGGGATAGATAAGGCTCAAGAAGAACATGAAAGATATCACAGCAATTGGAGAACAATGGCTAGTGATTTTAATCTGCCACCTATAGTAGCAAAGGAAATAGTAGCCAGCTGTGATAAATGTCAACTAAAAGGGGAAGCCATGCATGGACAAGTAGACTGTAGCCCAGGGATGTGGCAATTAGATTGCACACATCTAGAAGGAAAAGTGATTCTGGTAGCAGTCCATGTAGCCAGTGGCTATATAGAAGCAGAAGTTATCCCAGCAGAAACAGGACAGGAGACAGCATACTTTCTACTAAAATTAGCAGGAAGGTGGCCAGTAAAAGTAGTACACACAGACAATGGCCCCAATTTCACCAGCGCTGCATTTAAAGCAGCCTGTTGGTGGGCAAATGTCCAACAGGAATTTGGGATTCCCTACAATCCCCAAAGTCAAGGAGTAGTGGAATCTATGAATAAGGAATTAAAGAAAATCATAGGGCAGGTAAGAGAGCAAGCTGAACACCTTAAGACAGCAGTACAAATGGCAGTATTCATTCACAATTTTAAAAGAAAAGGGGGGATTGGGGGATACAGTGCAGGGGAAAGAATAATAGACATAATAGCAACAGACATACAAACTAGAGAACTACAAAAACACATTACAAAAATGCAAAATTTTCGGGTTTATTTCAGGGACAGCAGAGATCCACTTTGGAAAGGACCAGCAAAACTACTCTGGAAAGGTGAAGGGGCAGTAGTAATACAGGATAATGGTGATATAAAGGTAGTGCCCAGAAGAAAAGCAAAGATCATTAGGGATTATGGAAAACAGATGGCAGGTGATGATTGTGTGGCAGGTAGACAGGATGAGGATTAGAACATGGAACAGTTTAGTAAAACATCATATGTATGTCTCAAAGAAAGCTAAAGGTTGGTTTTATAGACATCACTTTGAAAGCAGACATCCAAAAGTAAGTTCAGAAGTACACATCCCACTAGGAGATGCTAGACTAGTAGTAACAACATATTGGGGTCTGCAGACAGGAGAAAAAGACTGGCAATTGGGTCATGGGGTCTCCATAGAATGGAGGCTAAAAAGATATAGCACACAAATAGATCCTGACCTGGCAGACCAACTAATCCATCTGCATTATTTTAACTGTTTTTCAGACTCTGCCATAAGGAGAGCCATATTAGGACAAGTAGTTAGCCCTAGTTGTGAATATCAAGCAGGACATAACAAGGTAGGATCTCTACAATATTTGGCACTGAGAGCATTAGTAACACCAACAAGGACAAGGCCACCTTTGCCTAGTGTTAGGAAGTTAGCAGAGGACAGATGGAACAAGCCCCAGAAGACCAGGGGCCACAGAGGGAGCCATACAATGAATGGACATTAGAACTGTTAGAAGAACTTAAGCATGAAGCTGTTAGACATTTTCCTAGGCCATGGCTCCATGGATTAGGACAACATATCTATAACACCTATGGGGATACTTGGGAAGGAGTTGAAGCTATAATAAGAACTTTGCAACAACTACTGTTTGTCCATTTCAGAATTGGGTGCTCACATAGCAGAATAGGCATTACGCGAAGGAGAAGAGCTAGGGATGGATCCAGTAGATCCTAACCTAGAGCCCTGGAACCATCCGGGAAGTCAGCCTGCAACTGCTTGTAGCACGTGTCACTGTAAAAAGTGTTGCTATCATTGTCCAGTTTGCTTTCTGAACAAAGGCTTAGGCATCTCCTATGGCAGGAAGAAGCGGAGACAGCGACGAAGAGCTCCTCAAAGCAGTAAGGATCATCAAAATCCTGTACCAAAGCAGTAAGTAGTAGTAATTAAGTATATGTAATGACTCCTTTGGAAATCTCTGCAATAGTAGGACTGGTAGTGGCGCTAATCCTAGCAATAGTTGTGTGGACTATAGTAGGTATAGAATATAAGAGATTAAGAAAGCAAAGGAAAATAGACAGGATAATTAAGAGAATAAGTGAAAGAGCAGAAGACAGTGGCAATGAGAGTGATGGGGACGCAGAGGAATTGGCAAAACTTGTGGAGATGGGGTACTATGATCTTGGGGATGATAATAATTTGTAGTACTGCAGAAAACTTGTGGGTTACTGTCTACTATGGGGTACCTGTGTGGAAAGACGCAGAGACCACCTTATTTTGTGCATCAGATGCGAAAGCGTATGATACAGAAATGCATAATGTCTGGGCTACGCATGCCTGTGTACCTACAGACCCCAACCCACAAGAAATAAATTTGAAAAATGTGACAGAAGAATTTAACATGTGGAAAAATAACATGGTAGAGCAGATGCATGCAGATATACTTAGTCTATGGGACCAAAGCCTAAAGCCATGTGTAAAGTTAACCCCTCTCTGCGTTACTTTAGAATGTCAAAACTATGAAGGCACCAATTTAACTAATAGTAACACCACTGTCAACATCACCGAGGACATGAAAGGAGAAATAAAAAACTGCTCTTTCAATATGACCACAGAATTAAGGGATAAGAGGCAGAAAATGCATTCGCTTTTTTATAGACTGGATATAGTACAAATTAATGGCAACAGAAGCAATAGTAGTGAACAGTATAGATTAATAAATTGTAATACCTCAGCCATTACACAAGCTTGTCCAAAGGTATCCTTTGAGCCAATTCCCATACATTATTGTGCCCCAGCTGGTTTTGCGATTCTGAAGTGTAAGGATAGAGATTTCAATGGAACAGGGCCATGCAAGAATGTCAGCACAGTACAGTGCACACATGGAATCAAGCCAGTAGCATCAACTCAATTGCTGTTAAATGGCAGTCTAGCAGAAGGAGAGGTTATGATTAGATCTGAAAATATCACAAACAATGCCAAAAACATAATAGTACAACTTAACAAGCCTGTAAACATTACTTGTATCAGACCTAACAACAATACAAGACAAAGTGTACGTATAGGACCAGGACAAGCATTCTATGCAACAGGTAACATAATAGGGGATATAAGACAAGCATATTGTGATGTCAATAGAACAGAATGGAATAAAACTTTGCAAGAGGTAGCCTACCAATTAGGAAAACACTTTGGGAACAAAACAATAATCTTTGCTAACTCCACAGGAGGGGATCTAGAAATAACAACACATAGTTTTAATTGTGGAGGAGAATTTTTCTATTGTAACACAACAAACCTGTTTAATAACATTTGGAGTAATGCCAGCATGCAGAAGGCAAATAGCATAAACGACACTATAACTCTCCAATGCAGAATAAAGCAAATTATAAATATGTGGCAGAGAGTAGGACAAGCAATATATGCCCCTCCCATCCAAGGAGTGATAAAGTGTGAATCAAACATTACAGGACTAATATTAACAAGAGATGGTGGGGGTAATAACAATACAAATGAAACCTTCAGACCTGGAGGAGGAGATATGAGGGACAATTGGAGAAGTGAATTATATAAGTATAAAGTAGTAAAAATTGAACCACTAGGAGTAGCACCTACCAGGGCAAAGAGAAGAGTGGTGGAGAGAGAAAAAAGAGCAGTTGGAATGGGAGCTGTCCTCATTGGGTTCTTAGGAGCAGCAGGAAGCACTATGGGCGCGGCGTCAATAACGCTGACGGTACAGGCCAGACAATTATTGTCTGGCATAGTGCAACAGCAAAGCAATTTGCTGAGGGCTATAGAGGCTCAACAGCATCTGTTGAAACTCACGGTCTGGGGCATTAAACAGCTCCAGGCAAGAGTCCTGGCTGTGGAAAGATACCTAAAGGATCAACAGCTCCTAGGAATTTGGGGCTGCTCTGGAAAACTCATCTGCACCACTAATGTGCCCTGGAACTCTAGTTGGAGTAATAAATCCCAGAGTGAGATATGGGACAACATGACCTGGCTGCAATGGGATAAAGAAATTAGCAATTACACACAGATAATATATAATCTAATTGAAGAATCGCAGATCCAGCAGAAAAAGAATGAACAAGACTTATTGGCATTGGACAAGTGGGCAAACCTGTGGAATTGGTTTGACATATCAAACTGRCTGTGGTATATAAGAATATTTATAATGATAGTAGGAGGCTTAATAGGATTAAGAATAGTTTTTACTGTGCTTTCCATAATAAATAGAGTTAGGCAGGGATACTCACCTTTGTCGTTCCAGACCCATACCCCAAACCCAAGGGGTCTCGACAGGCCAGGAAGAATCGAAGAAGAAGGTGGAGAGCAAGACAGAGACAGATCGATTCGATTAGTAAGCGGATTCTTAGCACTTGCCTGGGACGATCTGCGGAGCCTGTGCCTTTTCAGCTACCACCGATTGAGAGACTTCATCTTGATTGTAGCGAGGACTGTGGAACTTCTGGGACACAGCAGTCTCAAGGGACTGAGACTGGGGTGGGAAGGCCTCAAGTATCTGGGGAATCTTCTAATATATTGGGGTCAGGAACTAAAAATTAATGCTATTAATTTGCTTGATACCATAGCAATAGCAACAGCTGAGTGGACAGATAGGGTTATAGAAATAGGACAAAGACTTTGTAGAGCTATTCTCCACATACCTAGAAGAATCAGACAGGCCTTAGAAAGGGCTTTGCTATAACATGGGGGGCAAGTGGTCAAAAAGTAGCATAGTGGGATGGCCTGAGATTAGGGAGAGAATAAGACGAACTCCAGCAGCAGCAAAAGGAGTAGGAGCAGTATCTCAAGGTTTAGATCAATATGGAGCAATCACAAGCAGCAATATAAATCACCCTAGTTGCGCCTGGCTGGAAGCGCAAGAGGACGAGGAGGTAGGCTTTCCAGTTAGGCCACAGATACCTTTAAGACCAATGACTTACAAGGGAGCTTTTGATCTCAGCCACTTTTTAAAAGAAAAGGGGGGACTGGATGGGTTAATTTACTCCAGGAAGAGACAAGAGATCCTTGATCTGTGGGTATACCACACACAAGGCTTCTTCCCTGATTGGCAGAATTACACACCAGGGCCAGGGACCAGATACCCACTAACATTTGGATGGTGCTTCAAGCTAGTACCAGTTGATCCAGATGAAGTGGAGAAGGCTACTGAGGGAGAGAACAACAGCCTGTTACACCCTATATGCCAACATGGAATGGATGATGAGGAGAGAGAAACATTAATGTGGAAGTTTGACAGCCGCCTGGCATTAAAACACAGAGCCCTAGAGTTGCATCCGGAGTTCTACAAAGACTGCTGACACAGAAGTTGCTGACAGGGACTTTCCGCTGGGGACTTTCCAGGGGAGGTGTGGTTTGGGCGGAGTTGGGGAGTGGCCAACCCTCAGATGCTGCATATAAGCAGCTGCTTTTCGCCTGTACTGGGTCTCTCTTGGTAGTCCAGATCGAGCCTGGGAGCTCTCTGGCTAGCAAGGGAACCCACTGCT
>A1.UZ.02.02UZ652_AY829203_H.BE.93.VI997_AF190128
GCGAGAGCGTCAGTATTAAGCGGGGGAAAATTAGATGCATGGGAAAAAATTCGGTTAAGGCCAGGGGGAAAGAAAAAATATAGAATAAAACACCTAGTATGGGCAAGCAGGGAGCTGGAAAGATTCGCGCTTAACCCTAGCCTTTTAGAAACATCAGAAGGATGTCAACAAATACTGGAACAGTTACAACCAACTCTCAAGACAGGATCAGAAGAACTTAAATCATTATATAATACAGTAGCAACCCTCTATTGTGTACATCAACGGATAGAGATAAAAGACACCAAGGAAGCTTTAGATAAAATAGAGGAAATACAAAATAAGAGCAAGCAAAAGACCCAACAGGCAGCAACTGTCACAGGAAGCAGCAGCAAGGTCAGTCAAAATTACCCCATAGTGCAAAATGCACAAGGGCAAATGACACACCAGTCCATGTCACCTAGGACTTTGAATGCATGGGTGAAAGTAATAGAAGAAAAGGCTTTCAGCCCAGAAGTAATACCCATGTTTTCAGCATTGTCAGAGGGAGCCACCCCACAAGATTTAAACATGATGCTGAACATAGTGGGGGGACACCAGGCAGCTATGCAAATGTTGAAAGATACCATCAATGAGGAAGCTGCTGAATGGGATAGGTTACATCCAGCACAGGCAGGGCCTTTTCCACCAGGGCAGATGAGAGAACCAAGGGGAAGTGACATAGCAGGAACTACTAGTACCCTTCAAGAACAAATAGGATGGATGACAAGCAACCCACCTATCCCAGTGGGAGACATCTATAAAAGATGGATAATCCTAGGATTAAATAAAATAGTACGAATGTATAGCCCTGTTAGCATTTTAGACATAAGACAAGGGCCAAAAGAACCCTTCAGAGACTATGTAGATAGGTTCTTTAAAACTCTTAGAGCTGAGCAAGCTACACAGGATGTAAAGAACTGGATGACAGAAACCCTGCTGGTCCAAAATGCAAATCCAGATTGTAAAACTATTTTAAGAGCATTAGGATCAGGGGCTACATTAGAAGAAATGATGACAGCATGCCAGGGAGTGGGAGGACCCGGCCATAAAGCAAGGGTTTTGGCCGAGGCAATGAGTCAAGTACAAAATGCAAACATAATGATGCAGAAAAGTAATTTTAGGGGCCCAAAAAGAATTAAGTGTTTCAACTGTGGCAAAGAAGGACACCTAGCCAGAAATTGCAGGGCCCCTAGGAAAAAGGGCTGTTGGAAATGTGGAAAGGAAGGCCATCAAATGAAAGACTGCACTGAGAGACAGGCTAATTTTTTAGGGAGAATTTGGCCTTCCAGCAAAGGGAGGCCAGGAAATTTTCCTCAGAGCAGACCAGAACCATCAGCCCCACCAGCAGAAAACTTTGGGATGGGGGAAGAGATAACCCCCTCCCTGAAACAGGAACAGAAAGACAGGGAACAACGTCCTCCTTCAATTTCCCTCAAATCACTCTTTGGCAACGACCCCTTGTCACAGTAAGAATAGGAGGACAGCTAAAAGAAGCTCTATTAGATACAGGAGCAGATGATACGGTATTAGAAGACATAAATTTGCCAGGAAAATGGAAACCAAAAATGATAGGGGGAATTGGAGGTTTTATCAAGGTAAGACAGTATGATCAGATACTTATAGAAATTTGTGGAAAAAAGGCTATAGGTACGGTATTAATAGGGCCTACCCCTGTCAACATAATTGGAAGAAATATGTTGACTCAGCTTGGTTGTACTTTAAATTTTCCAATAAGTCCTATTGAAACTGTACCAGTAACATTAAAGCCAGGAATGGATGGCCCAAAGGTTAAACAATGGCCATTAACAGAAGAGAAAATAAAAGCATTAATAGACATTTGTAAGGAGATGGAGAAGGAAGGAAAAATTTCAAAAATTGGGCCTGAAAATCCATACAATACTCCAATATTTGTTATAAAGAAAAAAGATAGCACTAAGTGGAGGAAATTAGTAGATTTCAGGGAGCTCAATAAAAGAACTCAGGACTTTTGGGAAGTTCAATTAGGAATACCCCATCCAGCGGGTTTAAAAAAGAAAAAATCAGTAACAGTACTAGATGTGGGGGATGCATATTTTTCAGTTCCTTTAGATGAAAGCTTCAGAAAGTATACTGCATTCACTATACCAAGTATAAACAATGAGACACCAGGGATCAGATATCAGTACAATGTACTCCCACAGGGATGGAAAGGATCACCATCAATATTCCAGAGTAGCATGACAAAAATCTTAGAGCCATTTAGATTAAAAAATCCAGAAATAGTTATTTATCAATACATGGATGACTTGTATGTAGGCTCTGATTTAGAAATAGGGCAACATAGAACAAAAATAGAGGAGTTAAGAGCTCATCTATTGAGCTGGGGATTTACTACACCAGACAAAAAGCATCAGAAAGAACCTCCATTTCTTTGGATGGGATATGAACTCCATCCTGACAAATGGACAGTCCAGCCTATAATGCTACCAGATAAAGACAGCTGGACTGTCAATGATATACAGAAATTAGTGGGAAAACTAAATTGGGCAAGTCAGATTTATCCAGGGATTAAAGTAAGGCAATTGTGTAAACTCCTCAGGGGAGCCAAAGCACTGACAGATATAGTGACACTGACTGAGGAAGCAGAATTAGAATTGGCAGAGAACAGAGAGATTCTAAAAGAACCGGTGCATGGAGTATATTATGACCCATCAAAAGATTTAGTAGCAGAAATACAGAAACAAGGACAAGACCAATGGACATATCAAATTTATCAGGAGCCATTTAAAAATCTAAAAACAGGAAAATATGCAAAAAAGGGGTCTGCTCACACTAATGATGTAAAACAATTAACAGCAGTGGTGCAAAAAGTGGCCACAGAAAGCATAATAATATGGGGAAAGACTCCTAAATTTAGACTACCCATACAAAAAGAAACATGGGAAGCATGGTGGATGGAGTACTGGCAGGCTACCTGGATTCCTGAATGGGAGTTTGTCAATACCCCTCCTCTAGTAAAACTATGGTACCAGTTGGAGAAAGAACCCATAGTAGGAGCAGAGACTTTCTATGTAGATGGGGCAGCTAACAGGGAGACTAAGATAGGAAAAGCAGGGTATGTTACTGACAGAGGAAGACAAAAGGTTGTTCCTCTAACTGAGACAACAAATCAAAAGACTGAATTACATGCAATCCATCTAGCTTTGCAGGATTCAGGATCAGAAGTAAATATAGTAACAGACTCACAATATGCRTTAGGAATTATTCAGGCACAACCAGACAGGAGTGAATCAGGGATAGTCAATAAAATAATAGAGAAACTAATAGAAAAAGAAAGAGTCTACCTGTCATGGGTACCAGCGCACAAGGGGATTGGAGGAAATAAACAAGTAGATAAATTAGTCAGTAATGGAATCAGGAGGGTGTTATTTTTAGAAGGGATAGATAAGGCTCAAGAAGAACATGAAAAATATCACAGCAATTGGAAAGCAATGGCTAGTGATTTTAATCTGCCACCTATAGTAGCAAAGGAAATAGTAGCCAGCTGTGATAAATGTCAATTAAAAGGGAAAGCTATGTATGGACAGGTAGACTGTAGTCCAGGGATATGGCAATTAGATTGCACACATCTAGAAGGAAAAGTAATCATGGTAGCAGTCCATGTAGCCAGTGGCTATATAGAAGCAGAAGTTATCCCAGCAGAAACAGGACAGGAGACAGCATACTTTCTGCTAAAATTAGCAGGAAGATGGCCAGTAAAAGTAGTACACACAGATAATGGCCCCAATTTCACCAGCAGTGCAGTTAAGGCTGCCTGTTGGTGGGCAAATATCCAACAGGAATTTGGGATTCCCTACAATCCCCAAAGTCAAGGAGTAGTGGAGTCTATGAATAAGGAATTAAAAAAGATCATAGGGCAGGTAAGAGACCAAGCTGAACACCTTAGGACAGCAGTACAAATGGCAGTATTCATTCACAATTTTAAAAGAAAAGGGGGGATTGGGGGGTACAGTGCAGGGGAAAGAATAATAGACATAATAGCAACAGACATACAAACTAAAGAATTACAAAAACAAATTTCAAATATTCAAAAATTTCGGGTTTATTACAGGGACAGCAGAGACCCAATTTGGAAAGGACCAGCAAAACTACTCTGGAAAGGTGAAGGGGCAGTGGTAATACAGGACAATAACGATATAAAAGTAGTACCAAGAAGAAAAGCAAAGATCATTAGGGATTATGGAAAACAGATGGCAGGTGATGATTGTGTGGCAAGTAGACAGGATGAGGATTAGAACATGGAACAGTTTAGTAAAACATCATATGTATGTCTCAAAGAAAGCTAGAGAGTGGTTTTATAGACATCACTATGAAAGCAGAAATCCAAGAGTAAGTTCAGAAGTACACATCCCACTAGGGGATGCTAGGCTAGTAGTAAAAACATATTGGGGTCTGCATACAGGAGAAAAAGACTGGCACTTGGGTCATGGGGTCTCCATAGAATGGAGACAGGAAAGGTATAGCACACAAATAGACCCTGACCTGGCGGACCAACTAATTCATCTGTATTATTTTGACTGTTTTTCAGAATCTGCCATAAGGAAAGCCATAGTAGGACACATAGTTAGCCCTAGGTGTAACTATCCAGCAGGACACAACAAGGTAGGATCTCTACAATACTTGGCACTGAAAGCATTAGTAACACCAACAAGGGAAAGGCCACCTTTGCCTAGTGTTAGGAAACTAACAGAGGATAGATGGAACAAGCCCCAGAAGACCAGGGGCCGCAGAGGGAACCACACAATGAATGGATGTTAGAACTGTTAGAAGATATTAAGCATGAAGCTGTCAGACATTTTCCAAGGCCGTGGCTCCATGGATTAGGACAACATATCTATAACACCTATGGGGATACTTGGGAAGGGGTTGAAGCTATAATAAGAACTTTGCAACAACTACTGTTTGTTCATTTCAGAATTGGGTGCCAACATAGCAGAATAGGCATTGTGCAAAGGAGAAGAGTCAGGAATGGATCCAGTAGATCCTAACCTAGAGCCCTGGAATCATCCGGGAAGTCAGCCTAAAACTGCTTGTAGCAATTGTTACTGTAAAAAGTGTTGCTGGCATTGCCAAGTTTGCTTTCTAAAAAAAGGCTTAGGCATCTCCTATGGCAGGAAGAAGCGGAGACACAGACGAGGAACTCCTCACAGCAGTAAGGATCATCAAAATCTTATATCAAAGCAGTAAGTACTAAATAAATGTAATGACACCTTTAGAAATCTATGCAATAGTAGCATTAGTAGTAGTGTTTGTCATAGCAATAGTTGTGTGGACTATAGTAGGTATAGAATATAGGAAATTACTAAAACAAAGAAAAATAGACAGGTTAATYGAGAGAATAAGAGAAAGAGCAGAAGATAGTGGCAATGAAAGCGAGGGGGATGCAGAGGAATTATCAACACTTATGGAGGTGGGGAACCATGCTCTTTTGGATGATAATAATGTGTAAGGCTGCAGGAAACTTGTGGGTCACGGTATACTATGGGGTACCTGTGTGGAGAGATGCAGAGACCACCCTATTTTGTGCATCAGATGCTAAAGCCTATGATAAAGAAGTACACAATGTCTGGGCTACACATGCCTGTGTACCCACAGACCCTGACCCACAAGAAATGGCTTTGGAAAATGTGACAGAAAAATTTGACATGTGGAAAAATAACATGGTAGAACAAATGCAAACAGATATAATCAGTCTCTGGGACCAAAGCCTACAGCCATGTGTAAAGTTAACCCCTCTCTGCGTTACTTTAAATTGTGCTGAACCCAACAGCACTAGCTCTAACAACAGTAGCGTTAACAGCAACAGCAGCGATAGTTTGTTTGAAGAAATGAAAAACTGCCCTTTCAACATGACCACAGAACTAAGAGATAAAAGGAAAACTGTACATTCACTTTTTTATAAACTTGATATAGTATCAACTGATAGTAATGGTAGTGGGCAGTATAGACTAATAAATTGCAATACATCAACCATGACACAGGCCTGTCCTAAGGTAACCTTTGAGCCAATTCCTATACATTATTGTGCCCCAGCTGGTTTTGCGATTCTAAAGTGCAAGGATCCAAATTTTACTGGAACAGGGCCATGCAAGAATGTCAGCACAGTACAATGCACACATGGAATCAAGCCAGTAGTATCAACTCAACTGCTGTTAAATGGCAGTCTAGCAGAGAAAGAGGTAATGCTTAGATCTGAAAATATCACAGATAATGGCAAAATCATAATAGTACAGCTTACTGAGCCTGTAAACATCACTTGTATCAGACCTGGCAACAATACAAGAACAAGTATACGTATAGGACCAGGACAAACCTTCTATGCAACAGGTGATGTAATAGGGGACATAAGAAAAGCATATTGTAATGTCAGCAGAGCAGCATGGGATAGCACTTTACAAAAGATAAGTACACAATTAAGAAAATACTTTAATAACAAAACAATAATCTTTAAGAACTCCCCAGGAGGGGATTTAGAAGTTACAACACATAGTTTCAATTGTGGAGGAGAATTTTTCTATTGCAATACAACAGACCTGTTCAATAGCACTTGGGACAATGTCACAAATGTCACAAAGGCCAATGAAACTATAACTCTACCATGCAGAATAAAGCAAATTATAAATATGTGGCAGAGAGTAGGACAAGCAATGTATGCCCCTCCTATCAAAGGAAGTATAAGGTGTGAATCAAACATTACAGGACTACTACTAACAAGAGATGGTGGAGGTGGAACTAATAGCAGCAATGAGACCTTCAGACCTATAGGAGGAAATATGAAGGACAATTGGAGAAGTGAACTATATAAGTATAAAGTAGTAAAAATTGAACCAATAGGAGTAGCACCTACCAGGGCAAAGAGAAGAGTGGTGGAGAGAGAAAAAAGAGCAATTGGACTGGGAGCTGCCTTCCTTGGGTTCTTAGGAGCAGCAGGAAGTACTATGGGCGTGGCGTCAATGACGCTGACGGTACAGGCCAGACAATTGTTGTCTGGCATAGTGCAACAGCAAAGCAATTTGCTGAGGGCTATAGAGGCTCAGCAGCATCTGCTGAAACTCACGGTCTGGGGCATTAAACAGCTCCAGGCAAGAGTCCTGGCTGTGGAAAGATACCTAAAGGATCAGCAGCTCCTAGGAATTTGGGGTTGCTCTGGAAAACTCATCTGCACCACTAATGTGCCCTGGAACTCTAGTTGGAGTAACAAATCTCAGAGTGAGATATGGGATAACATGACCTGGATGCAATGGGACAAGGAAGTTATCAATTACACAGACATAATATATGATCTAATTGAAAAATCGCAAAACCAGCAGGAAAAGAATGAACAAGATTTATTGGCATTGGATAAGTGGGCAAGTCTGTGGAGTTGGTTTGACATATCAAATTGGTTATGGTATATAAAAATATTTATAATAATAGTAGGAGGCTTAATAGGATTAAGAATAGTTTTTGCTGTGCTTTCTATAATAAATAGAGCCAGGCAGGGATACTCACCCTTGTCATTGCAGACCCTTACCCCGCACCCAGAGGGACCAGACAGGCCCGGAAGAATCAACGAAGAAGGTGGAGAGCAAGGCAGAGACAGATCGATTCGATTGGTGAGCGGATTCTTAGCACTTGCCTGGGACGATCTGCGGAGCCTGTGTCTCTTCAGCTACCACCGATTGAGAGACTTCATCTCGATTGCAGCGAGGACTGTGGAACTTCTGGGACGCAGCAGTCTCAAGGGACTGAGACTGGGGTGGGAGGGCCTCAAGTATCTGGGGAATCTTCTGGGATATTGGGGTCAGGAACTAAAGAGTAGTGCTATCAATCTAATAGATACCATAGCAATAGCAGTAGCTAGGTGGACAGATAGGGTTATAGAAATAGGACAAAGACTTTGTAGAGCCATTCGTAACATACCTAGGAGAATCAGACAGGGCGCAGAAAGGGCTTTGCAATAACATGGGGGGCAAATGGTCAAAAAGTAGTATAGTGGGATGGCCTCAGGTTAGGGAAAGAATAAGACGAGCTCCTGCTCCAGCAGCAAGAGGAGTAGGACCAGTATCTCAAGATTTGGATAAGCATGGAGCAGTCACAAGCAGTAATACAGCAGCCAATAATGCTGATTGCGCCTGGCTGGAGGCGCAAAAGGAAGAGGAGGTAGGCTTTCCAGTCAGGCCGCAGGTACCTTTGAGACCGATGACATATAAGGGAGCTATCGATCTCAGCCACTTTTTAAAAGAAAAGGGGGGACTGGATGGGCTAATTTACTCCAAGAAAAGACAAGAAATCCTTGATCTGTGGGTCTATCACACACAAGGCTACTTCCCTGATTGGCAGAATTATACCCCAGGGCCAGGGATTAGATTCCCACTAACATTTGGGTGGTGCTACAAGCTAGTACCAGTTGACCCAGAGGAAGTAGAAGAGGCCACAGAGGGAGAGAACAACAGCCTATTACACCCTATATGCCAACACGGAATGGATGATGAGGAAAAAGAAGTGTTAATGTGGAAGTTTGACAGTCGCCTGGCTCTAACACACAGAGCCCGAGAGCTACATCCGGAGTTTTACAAAGACTGCTGACACAGACTGCTGACATGAAGTTGCTGACAGGGACTTTCCGCGGGGACTTTCCAGGGGAGGTGTGGTTTGGGCGAAGTTGGGGAGTGGCTAACCCTCAGATGCTGCATATAAGCAGCTGCTTTTCGCCTGTACTGGGTCTCTCTGGTTAGACCAGATCGAGCCTGGGAGCTCTCTGGCTAGCTAGGGAACCCACTGCT
>A1.KE.00.KSM4030_AF457079_J.SE.93.SE7887_AF082394
GCGAGAGCGTCAGTATTAAGCGGGGGAAAATTAGATGCATGGGAGAAGATTCGGTTAAGGCCAGGGGGAAAGAAAAAATATAGAATGAAACATTTAGTATGGGCAAGCAGGGAGCTGGACAGATTTGCACTTAACCCTAGCCTTTTAGAAACAACAGAAGGATGTCAACAAGTAATGGAAAAATTACAACCAGCTCTCAAGACAGGAACAGAAGAAATTAGATCATTGTATAATACAGTAGCAACCCTCTATTGCGTACATCAAAGGATAGAGGTAAAAGACACCAAGGAAGCCTTAGATAAAATAGAGGAAATACAAAATAAGAGCCAGCAAAAGACACAACAGGCAGCAGCTGCTACAGGAAGCAGCAGCAAGATCAGTCAAAATTACCCTATAGTGCAAAATGCACAAGGGCAAATGGTACATCAGTCCTTGTCACCTAGGACTTTGAATGCATGGGTAAAAGTAATAGAAGAAAAGGCTTTTAGCCCAGAAGTAATACCAATGTTTTCAGCATTATCAGAAGGAGCCACCCCACAAGATTTAAATACGATGCTGAATATAGTGGGGGGACACCAGGCAGCGATGCAAATGTTAAAAGATACCATCAATGAGGAAGCTGCAGAATGGGACAGGTTACATCCAGTACATGCAGGGCCTATTCCACCAGGCCAAATGAGAGAACCAAGGGGAAGTGATATAGCAGGAACTACTGGTACCCCTCAAGAGCAAATAGGATGGATGACAGGCAATCCACCTATCCCAGTGGGAGACATCTATAAAAGATGGATAATCCTGGGATTAAATAAAATAGTAAGAATGTATAGCCCTGTTAGCATTTTGGATATAAAACAAGGGCCAAAAGAGCCCTTCAGAGATTATGTAGATAGGTTCTTTAAAGCTCTCAGAGCTGAGCAAGCTACACAGGAGGTAAAAGGTTGGATGACAGAAACATTGCTGGTCCAAAATGCAAATCCAGATTGTAAGTCCATTTTAAGAGCATTAGGAGCAGGGGCTACAATAGAAGAAATGATGACAGCATGCCAGGGAGTGGGAGGACCCGGCCATAAGGCAAGGGTTTTGGCTGAGGCAATGAGTCAGGTACAGAATACAAACATAATGATGCAAAGAGGCAATTTTAAGGGCCAGAAAAAGATTAAGTGTTTCAACTGTGGCAAAGAAGGGCACCTAGCCAGAAATTGCAGGGCCCCCAGGAAAAAGGGCTGTTGGAAATGTGGGAAGGAGGGACACCAAATGAAAGATTGCACTGAAAGACAGGCTAATTTTTTAGGGAGAATTTGGCCTTCCAACAAGGGGAGGCCGGGAAATTTTCCTCAGAACAGATTAGAGCCAACAGCCCCACCAGCAGAGGACTGGAGGATGAGGGAAGAGATAGCCTCCCCTCCGAAGCAGGAGCAGAACGACAGGGAGCCGGATCAACCTTTAATTTCCCTCAAATCACTCTTTGGCAACGACCCCTTGTCACAGTAAGAATAGGGGGACAACTAAGAGAAGCTCTATTAGATACAGGAGCAGATGATACAGTTTTAGAAGACATAGATTTGCCAGGAAAATGGAAACCAAAAATGATAGGGGGAATTGGAGGTTTTATTAAGGTAAAACAGTATGATCAGATACTTATAGAAATTTGTGGAAAAAAGGCTATAGGTACAGTATTAGTAGGACCTACACCTGTCAACATAATTGGAAGAAATATGTTGACTCAGATTGGTTGTACTTTAAATTTTCCAATTAGTCCTATTAAGACTGTACCAGTAACATTAAAGCCAGGAATGGATGGCCCAAGGATTAAACAATGGCCATTGACAGAAGAAAAGATAAAGGCATTAACAGAAATTTGTAAAGAGATGGAAAAGGAAGGAAAAATTTCAAAAATTGGGCCTGAAAATCCATACAATACTCCAGTATTTGCTATAAAGAAAAAAGATAGCACTAAATGGAGAAAATTAGTAGATTTTAGAGAACTCAATAAAAGAACTCAGGACTTCTGGGAAGTTCAATTAGGAATACCGCATCCCGCAGGTCTAAAAAAGAAAAAATCAGTAACAGTACTAGATGTGGGGGACGCATATTTTTCAGTTCCTTTAGATGAAAGCTTTAGAAAGTACACTGCGTTCACCATACCTAGTATAAACAATGAGACACCAGGAATCAGGTATCAGTACAATGTGCTTCCACAGGGATGGAAAGGATCACCGGCAATATTCCAGAGTAGCATGACAAAAATCTTAGAGCCCTTTAGATCACAAAATCCAGGAATAATTATCTATCAATACATGGATGACTTATACGTAGGGTCTGATTTAGAAATAGGGCAGCATAGAACAAAAGTAGAGGAGTTGAGGGCTCATCTATTGAATTGGGGATTTACTACACCAGACAAAAAGCATCAGAAAGAACCTCCATTTCTTTGGATGGGATATGAACTCCATCCTGACAAATGGACAGTACAGCCTATACAGTTGCCAAACAAAGACAGCTGGACTGTCAATGATATACAGAAATTAGTGGGAAAACTAAATTGGGCAAGTCAAATTTATGCAGGAATTAAAGTAAAGCAATTGTGCAGACTCCTCAGGGGAGCCAAAGCACTAACAGATATAGTACCATTGACTGAGGAAGCAGAATTAGAATTGGCAGAGAACAGGGAGATTCTAAAAAACCCTGTGCATGGAGTATATTATGACCCATCAAAAGACTTAATAGCAGAAATACAGAAACAGGGGCAAGACCAATGGACATATCAAATTTATCAAGAGCCATTTAAAAATCTAAAAACAGGAAAATATGCAAGAAAAAGGTCTGCTCACACTAACGATGTAAAACAATTGGCAGAAGTGGTGCAAGCAGTGGTCAAGGAAAGCATAGTAATATGGGGAAAGACTCCTAAATTTAAACTACCCATACAAAAAGAAACATGGGAGACATGGTGGATGGACTATTGGCAGGCTACCTGGATTCCTGAATGGGAGTTTGTCAATACCCCTCCTCTAGTAAAATTATGGTATCAGTTAGAGAAAGACCCCCTAGAAAGAGTAGAGACTTTCTATGTAGATGGAGCAGCTAATAGGGAAACTAAGCTAGGAAAAGCAGGATATGTCACTGATAGGGGAAGACAAAAGGTTGTTTCCCTAACTGAGACAACAAATCAAAAGGCTGAACTACATGCAATCCATCTAGCCTTGCAGGATTCAGGATCAGAAGTAAATATAGTAACAGACTCACAGTATGCATTAGGAATCATTCAGGCACAACCAGACAGAAGTGAATCAGAAATAGTCAATCAAATAATAGAGAAGCTAATAGAAAAGGACAAAGTCTACCTGTCATGGGTACCAGCACACAAGGGGATTGGAGGAAATGAACAAGTAGATAAATTAGTCAGCTCTGGAATCAGGAAGATACTATTTTTAGATGGGATAGATAAGGCTCAAGAAGAACATGAAAGATATCATAGCAATTGGAGAGCAATGGCTAGTGATTTTAATCTGCCACCTGTAGTAGCAAAAGAGATAGTAGCTAGCTGTGATAAATGTCAGCTAAAGGGGGAAGCCATGCATGGACAAGTAGACTGTAGTCCAGGGATATGGCAATTAGATTGTACACATCTAGAAGGAAAAGTTATCCTGGTAGCAGTTCATGTAGCCAGTGGCTATATAGAAGCAGAAGTTATCCCAGCAGAAACAGGACAGGAAGCAGCATTCTTTATACTAAAATTAGCAGGAAGATGGCCAGTAAAAGTAGTACACACAGACAATGGCAGCAATTTCACCAGCGGTGCATTCAAAGCAGCCTGTTGGTGGGCAGGTATCCAACAGGAATTTGGAATTCCCTACAATCCCCAGAGTCAAGGAGTAGTAGAATCTATGAATAAGGAATTAAAGAAAATCATAGGACAGGTAAGAGAGCAAGCTGAACACCTTAAAACAGCAGTACAAATGGCAGTATTCATTCACAATTTTAAAAGAAAAGGGGGGATTGGGGGGTACAGTGCAGGGGAAAGAATAATAGACATAATAGCAACAGACATACAAACTAAAGAATTACAAAAACAAATTACAAAAATTCAAAATTTTCGGGTTTATTACAGGGACAGCAGAGATCCACTTTGGAAAGGACCAGCAAAACTGCTCTGGAAAGGTGAAGGGGCAGTAGTAATACAGGATAATAGTGATATAAAGGTAGTACCAAGAAGAAAAGCAAAGATCATCAGGGACTATGGAAAACAGATGGCAGGTGATGATTGTGTGGCAGGTAGACAGGATGAGGATTAGAACATGGAACAGTTTAGTAAAACATCATATGTATGTCTCAAAGAAAGCTAAAAATTGGTTTTATAGACATCATTATGAAAGCAGACATCCAAGAGTAAGTTCAGAAGTACATATCCCACTAGGGGATGCTAGATTAGTAGTAAGAACTTATTGGGGTCTACATACAGGAGAAAAAGACTGGCAATTGGGTCATGGGGTCTCCATAGAATGGAGGCTAAAAAAATATAGCACACAAATAGATCCTGACCTGGCAGACCAACTAATTCATCTGCATTATTTTAACTGTTTTTCAGACTCTGCCATAAGGAAAGCCATATTAGGACAAGTAGTTAGCCCTAGTTGTGAATATCAAGCAGGACATAACAAGGTAGGATCTCTACAATATTTGGCACTGAAAGCATTAGCAACACCAACAAAGGCAAGGCCACCTTTGCCTAGTGTTAGGAAACTAACAGAGGACAGATGGAACAAGCCCCAGAAGACCAGGGGCCCCCAAGGGAGCCATACCATCAATGGATGTTAGAACTGTTAGAAGAGCTTAAGCATGAAGCGGTTAGACATTTTCCTAGGCCATGGCTCCATGGATTAGGACAACATATCTATGAAACCTATGGGGATACTTGGGAAGGAGTTGAAGCTATAATAAGACTTTTGCAACAACTACTGTTTGTTCATTTCAGAATTGGGTGCCAACATAGCAGAATAGGCATTATTCGAGGGAGAAGAGTCAGGAATGGACCCGGTAGATCCTAACCTAGAGCCCTGGAACCACCCGGGAAGTCAGCCTACAACACCTTGTAGCAAATGTTATTGTAAAAAGTGTTGCTATCATTGCCAAGTTTGCTTTTTGAACAAAGGCTTAGGCATCTCCTATGGCAGGAAGAAGCGGAGACAGAGACGAAGAACTCCTCAGAGCAATAAGGATCATCAAAATCCTATACCAAAGCAGTAAGTATTAGTAATTAACATATGTAATGTCGGCTTTAGAAATCTGTGCAATAATAGGACTGGTAGTGGCATTAATCTTAGCAATAGTTGTGTGGACTATAGTAGGTATAGAGTGTAAGAGATTGCAAAAACAAAGGAAAATAGACAGGTTAATTAGGAGGATAAGAGAAAGAGCAGAAGACAGTGGCAATGAGAGCGATGGGGATACAGATGAATTATCAAAACTTGTGGAGATGGGGAACTATGATCTTGTGGATGATAATAATTTGTAGTGCTACAGGACACTTGTGGGTTACTGTCTACTATGGGGTACCAGTGTGGAAAGACGCAGAGACCACCTTATTTTGTGCCTCAGATGCTAAAACATATGAGTCAGAAAAGCATAATGTCTGGGCTACACATGCCTGTGTACCCACAGACCCCAACCCACAAGAAATACATTTGGAAAATGTGACAGAAGAGTTTAACATGTGGAAAAATAAAATGGTAGAACAGATGCATACAGATATAATCAGTCTATGGGATCAAAGCCTAAAGCCATGTGTAAAGTTAACCCCTCTCTGCGTTACTTTAAATTGTCACAACATATCCCTCACGAATACCACTGGTAATATCACCAATGACATGGGAGAAGAAATAAAAAACTGCTCTTTCAATATGACCACAGAATTAAGGGATAAGAGCCAGGAAGTACATTCACTTTTTTATAAACTGGATGTAGTACCTATGAAAGACAGGCAGTATAGATTAATAAATTGTAATACCTCAGTCATTAAACAAGCTTGTCCAAAAGTATCCTTTGAGCCAATTCCCATACATTATTGTGCCCCAGCTGGTTTTGCGATTCTAAAGTGTAATGATAAGGAGTTCAATGGAACAGGGCCATGCAAGAATGTCAGCACAGTACAATGCACACATGGAATCAAGCCAGTGGTGTCAACTCAACTGCTGTTAAATGGCAGTCTAGCAGAAGAAAAGATAATAATTAGATCTGAAAATATCACAAATAATGCCAAAAACATAATAGTACAACTTAAAAAGCCTGTAAAAATTAATTGTACCAGACCTAGCAACAATACAAGAAAAAGTGTACGTATAGGACCAGGCCAAGTATTCTATGCAACAGACATAATAGGGAACATAAGACAAGCACATTGTAATGTCAGTAAATTAGAATGGAATAACACTTTACAACAGGTAGCTGAACAATTAAGAGGATACTTTAAGAACAAAACAATAATATTTACTAACTCCTCAGGAGGGGATCTAGAAATCACAACACATAGTTTTAATTGTAGAGGAGAATTTTTCTATTGTGACACATCAGGCCTGTTTTATTGGAATAGCACTTGGAATGGCACTGAGTCAAACAACACAAAGTCAAACGACACTATAACTCTCCAATGCAGAATAAAGCAAATTATAAATATGTGGCAGAGAGTAGGACAAGCAATATATGCCCCTCCCATCAAAGGAGTAATAAGGTGTGAATCAGACATTACAGGACTTATACTAACAAGAGATGGTGGGAATACTAACAATACAGAGGAAACCTTCAGACCTGGAGGAGGAGATATGAGGGACAATTGGAGAAGTGAATTATATAAGTATAAAGTAGTAAAAATTGAACCACTAGGAGTAGCACCCACCAAGGCAAAGAGAAGAGTGGTGGGGAGAGAAAAAGAGCAGTTGGAATAGGAGCTGTCTTCCTTGGGTTCTTAGGAGCAGCCGGAAGCACTATGGGCGCGGCGTCAATAACGCTGACGGTACAGGCCAGACAATTATTGTCTGGCATAGTGCAACAGCAAAGCAATTTGCTGAGGGCTATAGAGGCTCAACAGCATCTGTTGAAACTCACGGTCTGGGGCATTAAACAGCTCCAGGCAAGAGTCCTGGCTCTGGAAAGATACCTAAAGGATCAACAGCTCCTAGGAATTTGGGGCTGCTCTGGAAAACTCATCTGCACCACTAATGTGCCCTGGAACTCTAGTTGGAGTAATAAAACCCAGGAAGAGATATGGGGAAACATGACCTGGCTGCAATGGGATAAAGAAATTAGCAATTACACAAATATAATATATACTCTAATTGAAGAATCGCAGAACCAGCAGGAAAAGAATGAACAAGACTTATTGGCATTGGACAAGTGGGCAAATTTGTGGAATTGGTTTGACATAACAAACTGGCTGTGGTATATAAAAATATTTATAATGATAGTAGGAGGCTTAATAGGATTAAGAATAGTTTTTGCTGTGCTTTCTATAATAAATAGAGTTAGGCAGGGATACTCACCTTTGTCGTTCCAGACCCATACCCCAAACCCAGGGGGACTCGACAGGCCCGGAAGAATCGAAGAAGAAGATGGAGAGCAAGGCAGAGACAGATCGATTCGATTAGTGAGCGGATTCTTAGCACTTGCCTGGGACGATCTACGGAGCCTGTGCCTCTTCAGCTACCACCGCTTGAGAGACTTCATCTTGATTGCTGCGAGGACTGTGGAACTTCTGGGACGCAACAGTCTCAAGGGGTTGAGACTGGGGTGGGAAGGCCTCAAGTATCTGTGGAATCTCCTGTGCTATTGGGGTCGGGAACTAAAAATTAGTGCTATTAGTTTAGTCAATACCATAGCAATAGCAGTAGCTGGCTGGACAGATAGGGTTATAGAAATAGGACAAGGAATTGGTAGCCACATACCTAGAAGAATTAGACAGGGCTTAGAAAGGGTTTTGCTATAACATGGGTGGCAAGTGGTCAAAAAGTAGCATAGTGGGATGGCCTGAGGTGAGGGAAAGAATAAGGCGTGCCCCTGCAGCAGCACCAGGAGTAGGAGCAGTATCTCGAGATTTAGATAGACATGGAGCAATTACAAGTAGTAATGTAAACCACCCTAGTTGCGTCTGGCTGGAAGCACAAGAGGAAGAGGAGGTAGGCTTTCCAGTTAAGCCACAAGTACCTCTAAGACCAATGACCTACAAGGGAGCTCTGGATCTCAGCCACTTTTTAAAAGAAAAGGGGGGACTGGAAGGGTTAATTTACTCCAGAAGAAGACAAGAAATCCTTGATCTGTGGGTCTACAACACACAAGGATATTTCCCTGATTGGCAGAATTACACGCCAGGGCCAGGGACAAGATTCCCACTAACATTTGGATGGTGCTTACCAGTTAATCCAGATGAAGTAGAGAAGGCTACTGAGGGAGAGAACAACAGCCTGTTACACCCGATATGTCAACATGGAATGGATGATGAGGAGAGAGAAGTATTAAAGTGGCAATTTGACAGCAGACTGGCATTTAAACACATAGCCCAAGAGATGCATCCGGAGTTCTACAAAGACTGCTGACACAGAAGTTGCTGACAGGGACTTTCCGCTGGGGACTTTCCAGGGGAGGTGTGGTTTGGGCGGAGTTGGGGAGTGGCTAACCCTCAGATGCTGCATATAAGCAGCCGCTTTTCGCCTGTACTGGGTCTCTCTTAGTAGACCAGATAGAGCCTGGGAGCTCTCTGGCTAGTAAGGGAACCCATTGCT
>A1.KE.94.Q23_17_AF004885_K.CM.96.MP535_AJ249239
AAGCTTGCCTTGAGTGCTTCAAGTAGTGTGTGCCCGTCTGTTGTGTGACTCTGGTAACTAGAGATCCCTCAGACCACTCTAGACGGTGTGAAAATCTCTAGCAGTGGCGCCCGAACAGGGACTCGAAAGCGAAAGTTCCAGAGAAGTTCTCTCGACGCAGGACTCGGCTTGCTGAGGTGCACACAGCAAGAGGCGAGAGCGGCGACTGGTGAGTACGCCAATTTTTTGACTAGCGGAGGCTAGAAGGAGAGAGATGGGTGCGAGAGCGTCAGTATTAAGCGGGGGAAAATTCGATGCATGGGAGAAAATTCGGTTAAGGCCAGGGGGAAAGAAAAAATATAGAATGAAGCATCTAATATGGGCAAGCAGGGAGCTGGACAGATTTGCACTTAACCCTAGCCTTTTAGAAACAGCAGACGGATGTCAACAAATAATGGAAAAATTACAACCAGCTCTCAAGACAGGAACAGAAGAAATAAAATCATTATTTAATACTGTAGCAACCCTCTATTGTGTACATCAACGGATAGATGTAAAAGACACCAAGGAAGCTCTAGATAAAATAGAGGAAATAAAAAATAAGAGCAAGCAAAAGACACAACAGGCAGCAGCTGACACAGGAAACAGCAGCAATGTCAGCCAAAATTACCCTATAGTGCAAAATGCACAAGGGCAAATGATACACCAGTCCTTGTCACCTAGGACTTTGAATGCATGGGTAAAAGTAATAGAAGAAAAGGCTTTCAGCCCAGAAGTAATACCCATGTTCTCAGCATTATCAGAAGGAGCCACCCCACAAGATTTAAATATGATGCTGAACATAGTGGGGGGACACCAGGCAGCTATGCAAATGTTAAAAGATACCATCAATGAGGAAGCTGCAGAATGGGACAGGTTACATCCAGTACATGCAGGGCCTATCCCACCAGGCCAGATGAGAGAACCAAGGGGAAGTGACATAGCAGGAACTACTAGTACCCCTCAAGAACAAATAGGGTGGATGACAGGCAACCCACCTATCCCAGTGGGAGACATCTATAAAAGATGGATAATTCTGGGATTAAATAAAATAGTAAGAATGTATAGCCCTGTTAGCATTTTGGATATAAAACAAGGGCCAAAAGAACCCTTCAGAGATTATGTAGATAGGTTTTTTAAAACTTTCAGAGCTGAGCAAGCTACACAGGATGTAAAAAATTGGATGACAGACACATTACTGGTCCAAAATGCAAATCCAGATTGCAAGGCAATTTTAAGAGCATTAGGACCAGGGGCTACATTAGAAGAAATGATGACAGCATGCCAGGGAGTGGGAGGACCCGGCCATAAAGCAAGGGTTTTGGCTGAGGCAATGAGTCAAGTACAACATACAAACATAATGATGCAGAGAGGCAATTTTAAGGGCCAGAAAAGAATTAAGTGTTTCAACTGTGGCAAAGAAGGACACCTAGCCAGAAATTGCAGGGCCCTTAGGAAAAAGGGCTGTTGGAAATGTGGGAAGGAGGGACACCAAATGAAAGATTGCACTGAAAGACAGGCTAATTTTTTAGGGAAAATTTGGCCTTCCAGAAAGGGGAGGCCAGGGAATTTTCCTCAGAACAGACTGGAACCAACAGCTCCACCAGCAGAGACCTGTGGGATGGGGGAAGAGACAGTCTCCCCTCTGAAGCAGGAGCAGAAAGACAGGGAACAGGCCCAACCCTTAGTTTCCCTCAAATCACTCTTTGGCAACGACCTCTTGTCACAGTAAGAATAGGGGGACAGCTAAAAGAAGCTCTATTAGATACAGGAGCAGATGATACAGTATTAGAAGACATAAATTTGCCAGGAAAATGGAAACCAAAAATGATAGGGGGAATTGGAGGTTTCATCAAGGTAAAACAATATGATCAGATACTTATAGAAATTTGTGGGAAAAAGGCTATAGGTACAGTATTAGTAGGACCTACACCTGTCAACATAATTGGAAGAAACATGTTGACTCAGATTGGTTGTACTTTAAATTTCCCAATTAGTCCTATTGAGACTGTACCAGTAAAATTAAAGCCAGGAATGGATGGCCCAAAGGTTAAACAATGGCCATTGACAGAAGAGAAAATAAAAGCATTAACAGAAATTTGTACAGAAATGGAAAAGGAAGGAAAAATTTCAAAAATTGGGCCTGAAAATCCATATAATACTCCAATATTTGCAATAAAGAAAAAAGATAGCACTAAGTGGAGAAAATTAGTAGATTTCAGAGAGCTCAATAAAAGAACACAAGACTTTTGGGAAGTTCAATTAGGGATACCGCATCCAGCGGGTCTAAAAAAGAAAAAATCAGTAACAGTACTAGATGTGGGGGACGCATATTTTTCAGTTCCTTTACATGAAGAGTTTAGGAAATATACTGCATTCACCATACCTAGTACAAACAACGAGACACCAGGAGTCAGGTATCAGTACAATGTGCTTCCACAGGGATGGAAAGGATCACCAGCAATATTCCAGAGTAGCATGACAAAAATCTTAGAGCCCTTTAGATCAAAAAATCCAGAAATAGTTATCTATCAATACATGGATGATTTGTATGTAGGATCTGATTTAGAAATAGGGCAGCATAGAGCAAAGATAGAAGAATTAAGAGCTCATCTATTGAGCTGGGGACTTATTACACCAGACAAAAAGCATCAGAAAGAACCTCCATTCCTTTGGATGGGATATGAGCTCCATCCTGACAAGTGGACAGTCCAGCCTATAGAGCTGCCAGAAAAAGACAGCTGGACTGTCAATGATATACAGAAATTAGTGGGGAAACTAAATTGGGCAAGTCAGATTTATGCAGGAATTAAAGTAAAGCAATTATGTAAACTCCTCAGGGGAGCCAAAGCACTAACAGATGTAGTAACATTGACTGAGGAAGCAGAATTAGAATTGGCAGAGAACAGGGAGATTCTAAAAGAACCTGTACATGGGGTATATTATGACCCATCAAAAGACTTAATAGCAGAAATACAGAAACAAGGGCAAGACCAATGGACATATCAAATTTTTCAAGAGCCATTTAAAAATCTAAAAACAGGAAAATATGCAAGAAAAAGGTCTGCTCACACTAATGATGTAAGACAATTAGCAGAAGTGGTGCAAAAGGTGGTCATGGAAAGCATAGTAATATGGGGAAAGACTCCTAAATTTAGACTACCCATACAAAAAGAAACATGGGACACATGGTGGATGGACTATTGGCAGGCTACCTGGATTCTTGAATGGGAATTTGTCAATACCCCTCCTCTAGTAAAATTGTGGTACCAATTAGAGAAAGACCCCATAGCAGGAGCAGAGACTTTCTATGTAGATGGGGCAGCTAATAGGGAAACTAAGCTAGGAAAAGCAGGATATGTTACTGATAAGGGAAGACAAAAGGTAGTTTCCCTAACTGAGACAACAAATCAAAAGACTGAACTACATGCAATCCATTTAGCCTTGCAGGATTCAGGATCAGAAGTAAACATAGTAACAGACTCACAATATGCATTAGGAATCATTCAGGCACAACCAGACAAGAGTGAATCAGAGATAGTCAATCAAATAATAGAGAAGCTAATAGAAAAGGACAAAGTTTACCTGTCATGGGTACCAGCACACAAAGGAATTGGAGGAAATGAACAAGTAGATAAATTAGTCAGTTCCGGAATCAGAAAGGTGCTGTTTTTAGATGGGATAGACAAAGCTCAAGAAGAACATGAAAGATATCATAGCAATTGGAGAACAATGGCTAGTGATTTTAATCTGCCACCTATAGTAGCAAAAGAAATAGTAGCCAGCTGTGATAAATGTCAGCTAAAAGGGGAAGCCATGCATGGACAAGTAGACTGCAGTCCAGGAATATGGCAATTAGATTGCACACATTTAGAAGGGAAAGTAATTGTGGTAGCAGTTCATGTAGCCAGTGGCTATATAGAAGCAGAAGTTATCCCAGCAGAAACAGGACAAGAGACAGCATACTTTCTACTAAAATTAGCAGGAAGATGGCCAGTAAAAATAGTACACACAGACAATGGCAGCAATTTCACCAGCGCTGCAGTTAAAGCAGCCTGTTGGTGGGCAAATATCCAACAGGAATTTGGGATTCCCTACAATCCCCAAAGTCAAGGAGTAGTGGAATCTATGAATAAGGAATTAAAGAAAATCATAGGGCAAGTAAGAGAGCAAGCTGAACACCTTAAAACAGCAGTACAAATGGCAGTATTCATCCACAATTTTAAAAGAAAAGGGGGGATTGGGGGGTACAGTGCAGGGGAAAGAATAGTAGATATAATAGCAACAGACATACAAACTAAAGAATTACAAAAACAAATTTTAAACATTCAAAAATTTCGGGTTTATTACAGGGACAGCAGAGAACCAATTTGGAAAGGACCAGCAAAGCTACTCTGGAAAGGTGAAGGGGCAGTAGTAATACAAGACAACAGTGAAATAAAGGTAGTACCAAGAAGAAAAGCAAAGATCATTAGGGATTATGGAAAACAGATGGCAGGCGATGATTGTGTGGCAGGTAGACAGGATGAGGATTAGAACATGGAACAGTTTAGTAAAACATCATATGCATGTCTCCAAGAAAGCAAAAAGGTGGTTTTATAGACATCACTATGAAAGCAGGCATCCAAAAGTAAGTTCAGAAGTACACATCCCACTAGGGGATGCTACATTAGTAGTAAGAGCATATTGGGGTCTGCATACAGGAGAAAAAGACTGGCACTTGGGTCATGGGGTCTCCATAGAATGGAGGCTAAAAAGATATAGCACACAAATAACTCCTGACCTGGCAGACCAACTAATTCATATGCATTATTTTGACTGTTTTTCAGACTCTGCCATAAGGAAAGCCATAGTAGGACAAGTAGTTAGTCCTAAATGTGAATATCAAGCAGGACATAACAAGGTAGGATCTCTACAATATTTAGCACTGAAAGCATTAGTAACACCAAAAAAGACAAAGCCACCTTTGCCTAGTGTTAGGATATTAACAGAAGATAGATGGAACAAGCCCCAGAAGACCAGGGGCCTCAGAGAGAGCCACACAATGAATGGATGTTAGAGCTGTTAGATGATCTTAAGCATGAAGCTGTTAGACATTTTCCTAGGCCATGGCTTCATGGATTAGGACAACATATCTATAACACCTATGGAGATACTTGGGAAGGAGTTGAAGCTATAACAAGAATTCTGCAACAACTACTGTTTGTTCATTTCAGAATTGGGTGCCAACATAGCAGAATAGGCATTATTCCAGGGAGAAGAGGCAGGAATGGACCCGGTAGATCCTAACCTAGAGCCCTGGAATCACCCGGGAAGTCAGCCTACAACTGCTTGCAACAAATGTTACTGTAAAAAGTGTTGTTATCATTGTCAAGTTTGCTTTTTGAACAAAGGCTTAGGCATCTCCTATGGCAGGAAGAAGCGGAGACAGCGACGAGGAGCTCCTCAGAGCAGTAAGGATCATCAAAATTCTATACAAAAGCAGTAAGTATTAGTAATAAGTATATGTAATGTCTCCTTTGGAAATCAGTGCAATAGTAGGGCTGATAGTAGCGCTAATCCTAGCAATAGCTGTGTGGACTATAGTAGGTATAGAATATAAGAAAATAAGAAAACAAAGAAAAATAGATAGGTTGATTGAGAGAATAAGAGAAAGAGCAGAAGACAGTGGCAATGAGAGTGATGGGGATACAGAGGAATTGTCAACACTTATTGACATGGGGGATTATGATCTTGGGGACAATAATATTCTGTAGTGCTGTGGAAAACTTGTGGGTTACTGTCTATTATGGGGTACCTGTGTGGAGAGATGCAGACACCACCTTATTTTGTGCATCAGATGCTAAAGCATATGAGACAGAAAAGCATAATGTCTGGGCTACACATGCTTGTGTACCCACAGACCCCAACCCACAAGAAATACATTTGGACAATGTGACAGAAAAGTTTAACATGTGGAAAAATAACATGGTAGAGCAGATGCACACAGATATAATCAGTCTATGGGATCAAAGCCTAAAGCCATGTGTAAAGTTAACCCCTCTCTGCGTTACTTTACATTGTACAAATGTCACAAGTGTCAACACCACTGGAGACAGGGAAGGCTTAAAAAACTGCTCTTTCAATATGACCACAGAACTAAGGGATAAGAGACAGAAAGTATATTCACTTTTTTATAGACTTGATATAGTACCAATTAATGAAAATCAGGGTAGTGAATATAGATTAATAAATTGTAATACCTCAGCCATTACACAGGCGTGCCCAAAGGTATCCTTTGAGCCAATTCCTATACATTATTGTACCCCAGCTGGTTTTGCGATCCTAAAGTGTAAGGATGAGGGGTTCAATGGGACAGGGTTATGCAAGAATGTCAGCACAGTCCAATGCACACATGGAATCAAGCCAGTAGTATCAACTCAATTGCTGTTGAATGGCAGTCTAGCAGAAAAAAATATAACAATTAGATCTGAAAATATCACAAACAATGCCAAAATTATAATAGTACAACTTGTCCAACCTGTGACAATTAAGTGTATCAGACCTAACAACAATACAAGAAAAAGTATACGTATAGGACCAGGACAAGCATTCTATGCAACAGGTGACATAATAGGGGATATAAGACAAGCACATTGTAATGTCACTAGATCAAGATGGAATAAGACTTTACAAGAGGTAGCTGAAAAATTAAGAACATACTTTGGGAACAAAACAATAATATTTGCTAACTCCTCAGGAGGGGATCTAGAGATCACAACACATAGTTTTAATTGTGGAGGAGAATTTTTCTATTGTAATACATCAGGCTTGTTTAATAGCACTTGGTATGTTAATAGCACTTGGAATGACACTGACAGCACTCAGGAGTCAAATGACACTATAACTCTCCCATGCAGAATAAAGCAAATTATAAATATGTGGCAGAGAGCAGGACAAGCAATGTATGCCCCTCCCATCCCAGGAGTAATAAAGTGTGAATCAAACATTACAGGACTACTATTAACAAGGGATGGTGGAAAGGATAACAATGTAAATGAAACCTTCAGACCTGGAGGAGGAGATATGAGGGACAATTGGAGAAGTGAATTATATAAGTATAAAGTAGTAGAAATTGAACCACTAGGAGTAGCACCTACCAGGGCAAAGAGAAGAGTGGTGGAGAGAGAAAAAAGAGCAGTTGGAATAGGAGCTGTCTTCCTTGGGTTCTTAGGAGCAGCAGGAAGCACTATGGGCGCAACGTCAATAACGCTGACGGTACAGGCCAGACAATTATTGTCTGGCATAGTGCAACAGCAAAACAATTTGCTGAGGGCTATAGAGGCTCAACAACATCTGTTGAAACTCACGGTCTGGGGCATTAAACAGCTCCAGGCAAGAGTCCTGGCTGTGGAAAGATACCTAAGGGATCAACAGCTCCTAGGAATTTGGGGCTGCTCTGGAAAACTCATCTGCACCACTAATGTGCCCTGGAACTCTAGTTGGAGTAATAAATCTCTGGATGAGATATGGAACAACATGACCTGGCTGCAATGGGATAAAGAAATTAACAATTACACACAACTAATATATAGACTAATTGAAGAATCGCAGAACCAGCAGGAAAAGAATGAAAAGGAATTATTGGAGTTGGACAAGTGGGCAAATCTGTGGAGTTGGTTTGACATATCAAATTGGCTGTGGTATATAAAAATATTTATAATAATAGTAGGAGGCTTAATAGGATTAAGAATAGTTTTTGCTGTGCTTTCTGTAATAAATAGAGTTAGGCAGGGATACTCACCTTTGTCATTTCAGACCCATACCCCAAACCCAAGGGGTCTCGACAGGCCCGAAAGAATCGAAGAAGAAGATGGAGAGCAAGGCAGAGGCAGATCGATTCGATTAGTGAGCGGATTCTTAGCACTTGCTTGGGACGACCTACGGAGCCTGTGCCTCTTCAGCTACCACCGCTTGAGAGACTTCATCTTGATTGCTGCGAGGACTGTGGAACTTCTGGGACACAGCAGTCTCAAGGGGCTGAGACTGGGGTGGGAAGGCATCAAGTATCTGTGGAATCTCCTGTCATATTGGGGTCGGGAACTAAAAATTAGTGCTATTAATCTAGTTGATACCATAGCAATAGCAGTAGCTGGCTGGACAGATAGGGTTATAGAAATAGCACAAAGAATTGGTAGAGCTATCCTCCACATACCTGTAAGAATCAGACAGGGCTTAGAAAGGGCTTTGCTATAACATGGGGGGCAAGTGGTCAAAAAGTAGCATAGTGGGATGGCCTGAGATTAGGGAAAGAATGAGACGTGCCCCTCCAGCAGCACCAGGAGTAGGAGCAGTATCTCAAGACTTAGATAAACATGGAGCAGTCACAAGTAAGAATATAAATCACCCTAGTTACGCCTGGCTGGAAGCGCAAGAGGACGAGGATGTAGGCTTTCCAGTCAGGCCACAAGTACCTCTAAGACCAATGACTTACAAGGGAGCTGTGGATCTCAGCCACTTTTTAAAAAAAAAGGGGGGACTGGATGGGTTAGTTTACTCTAGGAAAAGACAAGAAATCCTTGATCTGTGGGTCTATCACACACAAGGCTATTTCCCTGATTGGCAGAATTACACACCAGGGCCAGGGACCAGGTTCCCACTAACATTTGGGTGGTGCTTCAAGCTAGTACCAGTTGATCCAGATGAAGTAGAGAAGGCTACTGAGGGAGAGAACAACAGCCTATTACACCCGATATGTCAACATGGAATGGATGATGAAGAGAGAGAAGTATTAAAGTGGAAGTTTGACAGCCGCCTGGCACTAAAACACAGAGCCCGAGAGCTGCATCCGGAGTGGTACAAGGACTGCTGACACAGAAGTTGTTGACTGGGACTTTCCGCTGGGGACTTTCCAGGGGAGGTGTGGTTTGGGCGGAGTTGGGGAGTGGCCAACCCTCAGATGCTGCATATAAGCAGCTGCTTTTCGCCTGTACTGGGTCTCTCTTGTTAGACCAGATCGAGCCTGGGAGCTCTCTGGCTAGCTGGGGAACCCACTGCTTAAGCCTCAATAAAGCTTGCCTTGAGTGCTTCAAGTAGTGTGTGCCCGTCTGTTGTGTGACTCTGGTAACTAGAGATCCCTCAGACCACTCTAGACGGTGTAAAA
>A2.CD.97.97CDKTB48_AF286238_B.US.86.YU_2_M93258
TTTTTCGAAGCGAAGTACCAGGGAAGTTCTCTCGACGCAAGACTCGGCTTGCTGAGGTGCACACGGCAAGAGGCGAGAAGCGACGGCTGGTGAGTACGCCTAAAATTTTTGACTAGCGGAGGCTAGAAGGAGAGAGATGGGTGCGAGAGCGTCAGTATTGAGCGGCGGAAAATTAGAAGCTTGGGAGAAAATTCGGTTAAGGCCAGGGGGAAAGAAAAAATATAGACTGAAACATTTAGTATGGGCAAGCAGGGAGCTGGAAAAATTCTCAATCAACCCCAGCCTTTTAGAAACAGAAACAGGATGTAGACGAATATTTGGGCAATTACAACCAGCTCTCGAGACAGGAACAGAAGAACTTAGATCATTATATAATACAATAGCAGTCCTCTACTTTGTTCATCAAAAGATAGAGGTAAAAGACACCAAGGAAGCTCTAGATAAAATAGAGGAAGAACAAAACAAATGCAAGCAGAAGACACAGCAGGCAGCAGCTGACACAGGAAGCAGCAGCAGTCAAAATTACAGAGGTAGCAGCAGTCAAAATTACCCTATAGTGCAAAATGCACAAGGGCAAATGGTACACCAGGCCGTGTCACCTAGGACTTTGAATGCATGGGTCAAAGTAGTTGAAGAGAAGGCTTTTAGCCCAGAAGTAATACCCATGTTTACAGCATTATCAGAAGGAGCCACCCCACAAGACTTAAATACTATGCTAAACACAGTGGGGGGACATCAAGCAGCTATGCAAATGTTAAAAGATACCATCAATGAGGAAGCTGCAGAATGGGACAGGTTACATCCAGTACAGGCAGGGCCTATTCCACCAGGCCAGATGAGAGAACCAAGGGGAAGTGACATAGCGGGAGCTACTAGTAACCTTCAGGAACAAATAGGATGGATGACCAGCAACCCACCTATTCCAGTGGGAGAAATCTATAAAAGATGGATAATCCTGGGATTAAATAAAATAGTAAGAATGTATAGCCCTGTCAGCATTTTGGACATAAAACAAGGGCCAAAAGAACCCTTTAGAGACTATGTAGATAGGTTCTTTAAAACTCTCAGAGCTGAGCAAGCTACACAGGAGGTAAAAAATTGGATGACAGACACCTTGCTGGTCCAAAATGCAAACCCAGATTGTAAATCCATCTTGAGGGCATTAGGACCAGGGGCTACATTAGAAGAAATGATGACAGCATGTCAGGGAGTGGGAGGACCCGGCCATAAAGCAAGGGTTTTAGCTGAAGCAATGAGCCAAGTACAAAATACAAACATAATGATACAGAGAGGCAATTTTAAGGGTCAAAAAAGAATTAAGTGTTTCAACTGTGGCAAGGAAGGACACCTAGCTAGAAATTGCAGGGCCCCTAGGAAAAAGGGCTGCTGGAAATGTGGGAAGGAAGGACATCAAATGAAAGACTGCACTGAGAGACAGGCTAATTTTTTAGGGAAAATTTGGCCTTCCAACAAAGGGAGGCCAGGGAATTTTCCTCAGAGCAGGACAGAGCCAACAGCCCCACCAATGGAGGAAGAGATAACCTCCTCGCTGAAGCAGGAGAACAGGGAGCCGTCCACCCCTGCAATTTCCCTCAAATCACTCTTTGGCAACGACCTCTTGTCACAGTGAAAATAGAAGGACAGCTAAGAGAAGCTTTATTAGATACAGGAGCAGATGATACAGTGTTAGAAGACATAAATCTGCCATGGAAATGGAAACCAAAAATGATAGGGGGAATTGGAGGTTTTATCAAAGTAAGACAATATGATCAGATAGTTATAGAAATTTGTGGAAAAAGGGCTATCGGTACAGTATTAGTAGGACCTACACCTGTCAACATAATTGGAAGAAATATGTTGGTTCAGCTTGGTTGTACTCTAAATTTTCCAATTAGTCCTATTGAAACTGTACCAGTAAAATTGAAGCCAGGAATGGATGGTCCAAAGGTCAAACAATGGCCATTGACAGAAGAAAAAATAAAAGCATTAACAGAAATTTGTAAAGAAATGGAAAAGGAAGGGAAAATTTCAAAAATTGGGCCTGAAAATCCATACAACACTCCAGTGTTTGCTATAAAGAAAAAAGACAGCGATAAATGGAGAAAATTAGTAGATTTCAGAGAACTCAATAAGAGAACTCAAGACTTCTGGGAAGTTCAGTTAGGAATACCACACCCAGCGGGATTAAAAAAGAAAAAATCAGTAACAGTATTAGATGTGGGGGACGCATATTTTTCCGTTCCCCTACATGAAGACTTCAGGAAATATACTGCATTCACCATACCTAGTATAAACAATGAGACACCAGGAATTAGGTATCAGTACAATGTACTTCCACAGGGATGGAAAGGATCACCAGCAATATTCCAGAGTAGCATGACAAAAATCCTAGATCCCTTTAGGGCAAGAAATCCAGAGATGGTCATCTACCAATACATGGATGACTTGTATGTAGGATCTGATTTAGAAATAGATCAGCATAGAGCAAAAATAGAGGAGTTAAGGGCTCATTTATTAAGATGGGGATTTACTACACCAGACAAAAAGCATCAGAAAGAACCTCCATTTCTGTGGATGGGATATGAGCTTCATCCTGACAAGTGGACAGTCCAGCCTATAAAGCTGCCAGAAAAAGACAGCTGGACTGTCAATGATATACAGAAATTAGTAGGAAAGTTAAATTGGGCAAGTCAGATTTATGCAGGGATTAAAGTAAGGCAACTGTGTAAACTCCTTAGAGGAACCAAAGCATTAACAGACATAGTACCACTGACTAGAGAAGCAGAATTAGAATTGGAAGAGAACAGGGAGATTCTAAAAGACCCTGTACATGGGGTATATTATGACCCATCAAAAGACTTAATAGCAGAAATACAGAAACAAGGGCAAGGCCAATGGTCATATCAAATTTATCAAGAACCATTTAAAAATCTAAAAACAGGGAAATATGCAAAAAGGAAGTCCACCCACACCAATGATGTAAAACAATTAACAGAAGCAGTACAAAAAATAGCCACAGAAAGCATAGTAATATGGGGAAAGATTCCTAAATTTAGACTACCCATACAAAAAGAAACATGGGAGACATGGTGGACGGAGTGGTGGCAGGCTACCTGGATTCCTGAGTGGGAGTTTGTCAATACCCCTCCTCTAGTAAAACTATGGTACCAGTTAGAAACAGAACCCATAGCAGGAGCAGAAACTTTCTATGTAGATGGGGCAGCTAATAGAGAGACTAAACTAGGAAAGGCAGGGTATGTCACTGATAGAGGAAGACAAAAAATTGTCCCCTTGACAGAGACAACAAATCAAAAGACTGAATTACATGCAATCTATTTGGCTTTACAGGATTCAGGGTCAGAAGTAAACATAGTAACAGATTCACAGTATGCATTAGGAATCATTCAAGCGCAACCAGATAGCAGTGAATCAGAGTTAGTCAATCAAATAATAGAAAAGTTAATAGAAAAGGAAAGGGTCTACCTGTCATGGGTACCAGCACACAAAGGGATTGGAGGAAATGAACAGGTGGATAAATTAGTCAGTTGTGGAATCAGAAAAGTGTTATTTTTAGATGGGATAGATAAGGCTCAAGAAGAACATGAAAAATATCACAGTAATTGGAGAGCAATGGCTCATGACTTTAATCTGCCACCTATAGTAGCCAAAGAAATAGTAGCCAGCTGTGATAAATGGTCAGGCTAAAAGGGGAAGCCATGCATGGACAAGTAGACTGCAGTCCAGGAATATGGCAACTAGATTGCACACATCTAGAAGGAAAAATTATCGTGGTAGCAGTCCATGTAGCCAGTGGCTATATAGAAGCAGAAGTCATCCCAGCAGAGACAGGACAGGAGACAGCATACTTTCTATTAAAATTAGCAGGAAGATGGCCAGTAAAAGTAATACATACAGACAATGGGCCCAATTTCACCAGTGCAGCAGTTAAGGCAGCCTGTTGGTGGGCAGATGTCAAACAGGAATTTGGGATTCCCTACAATCCCCAAAGTCAAGGAGTAGTGGAATCTATGAATAAAGAATTAAAGAAAATCATAGGGCAGGTAAGAGATCAAGCTGAACATCTTAAGACAGCAGTGCAAATGGCAGTGTTCATCCACAATTTTAAAAGAAAAGGGGGGATTGGGGGATACAGTGCAGGGGAAAGAATAATAGACATAATAGCAACAGATATACAAACTAAAGAATTACAAAAACAAATCATAAAAATTCAAAATTTTCGGGTTTATTACAGGGACAGCAGAGATCCAATTTGGAAAGGACCAGCAAAACTCCTTTGGAAAGGTGAAGGGGCAGTAGTAATACAAGACAATGGTGATATAAAAGTAGTACCAAGAAGAAAAGCAAAGATCATTAGGGATTATGGAAAACAGATGGCAGGTGATGATTGTGTGGCAGGTAGACAGGATGAGGATTAGAACATGGAACAGTCTAGTAAAACATCATATGTATGTGTCAAAGAAAGCTAGAGAGTGGTTCTATAGACATCACTATGAAAGCAGACATCCAAGAGTAAGTTCAGAAGTACACATCCCGCTAAAGGAGGCTAGATTAATAGTAAGAACATATTGGGGTCTGCACCCAGGAGAAAAAGACTGGCACTTGGGTCATGGGGTCTCCATAGAATGGAGGCAGGGAAGGTACAGTACACAAATAGACCCTGATCTGGCAGACCATCTAATCCATCTGTATTATTTTGACTGTTTTTCAGAATCTGCCATAAGGAGAGCCATATTAGGAGAAATAGTTAGGCCTAGATGTGAATATCAAGCAGGACATAATAAGGTAGGGTCTCTGCAATATTTGGCATTGAGAGCATTAGTAGCTTCAACAAGGACAAAGCCACCTTTGCCTAGTGTTAGGAAATTAGTAGAGGATAGATGGAACAAGCCCCAGAAGACCAGGGGCCACCGAGGGAGCCACACAATGAATGGGTGTTAGAACTGTTAGAGGAGCTAAAGCAAGAAGCAGTTAGACATTTCCCTAGGCCGTGGCTACATGGCCTGGGACAACATATCTATAATACCTATGGGGATACTAGGGAGGGAGTTGAAGCTATAGTAAGAATTTTGCAACAACTACTGTTTGTTCATTTCAGAATTGGGTGCCAACATAGCAGAATAGGCATTATTCCAAGAAGAAGAGTAAGGGATGGAGCCAGTAGACCCTAACTTAGAGCCCTGGAACCATCCGGGAAGCCAGCCTAAAACTGCTTGTAACAATTGCTATTGTAAAAAGTGTTGCTATCATTGCCAAAGGTGCTTTCTAAACAAAGGCTTAGGCATCTCCTATGGCAGGAAGAAGCGGAGACCCCGACGAGGACCTGATCAGGGCAATACGGATCATCAAAATCCTGTACCAAAGCAGTAAGTAGTAGTAATCAATATAGGTAATGTCACCTTTAGCAATACTGTCAATAGTAGGACTGGTAGTAGCATCAATTTTAGCAATAGTTGTGTGGACTGTAGTATTTATAGAATATAGAAAGATTAAGAAGCAAAGGAAAATAGACTGGTTACTTGAGAGAATAAGTGAAAGAGCAGAAGACAGTGGCAACGAGAGTGATGGGGACACAGAGGAATTGTCAAAAATGGTGGGAATGGGGAATCTTGGTTTTTGGGATGATAATGATGTGTAAGGCTGCAGATTTGTGGGTCACAGTATACTATGGAGTACCTGTGTGGAGAGATGCAGATACCACCCTATTTTGTGCATCAGACGCTAAAGCATATGCTACAGAAAAGCATAATGTCTGGGCCACACATGCCTGTGTACCCACAGACCCCAACCCACAAGAAGTAAACCTGGCAAATGTAACAGAAGATTTTAACATGTGGAAAAATAACATGGTAGAGCAGATGCATGCAGATATAATCAGTCTATGGGATCAAAGCCTAAAGCCATGTGTAAAATTAACCCCTCTCTGCGTCACTTTAAATTGTAGCAATGCCAACACCACTAACACCAATAGCACTGAAGAAATAAAAAACTGCTCTTACAATATGCCCACAGAACTAAAAGATAAAACACAGAAAGTCTATTCACTGTTTTATGAACTTGATGTAGTACTACTTAATAGAAGTAAGAATAGTAGTTATAGTACTTATAGACTGATAAGTTGTAACACCTCAGTCATTACACAGGCCTGTCCAAAGGTATCCTTTGAGCCAATTCCCATACATTATTGTGCCCCGGCTGGTTTTGCGATTCTAAAATGTAATGATAAAAAGTTCAATGGAACAGGACCATGTACAAATGTCAGCACAGTACAATGTACACATGGAATTAGGCCAGTAGTATCAACTCAACTGCTGTTAAATGGCAGTCTAGCAGAAGAAGAGATAGTAATTAGATCTGAAAATATTACAGACAATGCCAAAAACATAATAGTACAGTTTAATAAACCTGTACCAATTAATTGTACCAGACCCAACAACAATACAAGAAAAAGTATACGCTTTGGACCAGGACAGGCCTTCTATACAAATAATAACATAATAGGGGATATAAGACAAGCACATTGTAATATCAGCATAACAGAATGGAATGCCACTCTAAAAAAGGTAGTTGAACAATTAAGAGAACACTTCCCTAATAAAACAATAATCTTTAATAGCTCCTCAGGAGGGGACCTAGAAATTACAACACATAGTTTTAATTGTGGAGGAGAATTTTTCTATTGCAATACAACAGGCCTGTTTAATAGCACATGGGAAAATGGCACTAACAAACAGAATTACACGGAGTCAAATGACACTATAACGCTCCAATGCAGAATAAAACAAATTATAAACATGTGGCAGAGAGTAGGCCGAGCAATGTATGCCCCTCCCATTGCAGGAGTAATAAAGTGTACATCAAACATTACAGGAATGATATTGACAAGAGACGGTGGGAAGAACAGTATTAATGAGACCTTCAGACCTGGAGGAGGAGATATGAGGGACAATTGGAGAAGTGAATTATATAAGTATAAAGTAGTAAAAATTGAACCACTAGGAATAGCACCCACAGAGGCAAGGAGAAGAGTGGTGCAGAGAGAAAAAAGAGCAGTTGGATTGGGAGCTGTTTTCCTTGGGTTCTTGGGAGCAGCAGGAAGCACTATGGGCGCGGCGTCAATAACGCTGACGGTACAGGCCAGACAATTATTGACTGGCATAGTGCAACAGCAAAGCAATTTGCTGAAGGCTATAGAGGCTCAACAACAGATGTTGAGGCTCACAGTCTGGGGCATTAAACAGCTCCAGGCAAGAGTCCTGGCTCTGGAAAGATACCTACAGGATCAACAGCTCCTAGGAATTTGGGGCTGCTCTGGAAAACTCATCTGCGCCACTGATGTGAGATGGAACTCTAGTTGGAGTAATAAGACTCAGGAGCAGATTTGGAAAAACATGACCTGGTTGCAATGGGATAAGGAAATTAGCACTTACACAGACATAATATATATGCTACTTGAGGAATCGCAGAACCAGCAGGAAAAGAATGAACAAGACTTATTGGCATTAGACAAATGGGCAAATTTGTGGAATTGGTTTGACATAACAAGATGGCTGTGGTATATAAAAATATTTATAATGATAGTAGGAGGCTTGATAGGATTAAGAATAGTTATTGCTATAATTTCTGTAGTAAAAAGAGTTAGGCAGGGATACTCACCATTGTCATTTCAGATCCCTACCCCAAACCCAGAGGGACTCGACAGGCCCGGAAGAATCGAAGAAGAAGGTGGAGAGCAAGGCAGAGACAGATCGATTCGATTAGTGAGCGGATTCTTAGCACTTGCCTGGGACGACCTACGGAGCCTGTGCCTCTTCAGCTACCACCGCTTGAGAGATTGCATCTTGATTGCAGCGAGGATTGTGGAACTTGTGGGACACAGCAGTCTCAAGGGGCTGAGACTGGGGTGGGAAGGCCTCAAACATCTGTGGAATCTTCTGGTATATTGGGGTCAGGAATTGAAGACTAGTGCTATTAGATTGCTTGATACCATAGCAGTAGCAGTAGCTGAGTGGACAGATAGGGTTATAGAAATAGGACAAAGAGCTTGCAGAGCTATCCGCAACATACCTAGAAGAATCAGACAGGGCCTCGAAAGGGCGTTACTATAAAATGGGGGGCAAGTGGTCAAAAAGAACCATAGTGGGATGGCCTGAGATTAGGGAAAGAATGAGACGAACTCCTCCAGCAGCAGAAGGAGTAAGACCAACTCCTCCAGCTGCAGAAGGAGTAGGAGCAGTGTCTCAAGATTTAGCCAGACATGGAGCAGTCACAAGCAGTAATACAGCAGCTAACAATCCTGATTGCGCCTGGCTGGAAGCGCAAGAAGAGGAGGAAGTAGGCTTTCCAGTCAGGCCACAGGTACCTTTAAGGGCGATGACCTACAAGGGAGCTGTAGATCTCAGCCACTTTTTAAAAGAAAAGGGGGGACTGGATGGGCTAATTTACTCCCAGAGAAGACAAGACATCCTTGATCTGTGGGTCTACAACACACAGGGCTACTTCCCTGATTGGCAGAATTACACACCAGGGCCAGGGGCCAGGTTCCCACTAACATTTGGATGGTGCTTCAAGCTAGTACCAGTTGATCCATCTGAGGTAGAAGAGGCTACGGAGGGGGAGAACAACAGTTTATTACACCCCATATGCCAACATGGAGCAGAGGACCCTGAAAGAGAAGTGTTAAAGTGGAAGTTTGATAGTCGCCTGGCGCTGAGACACCTAGCCAGAGAGCAGCATCCGGAGTTCTACAAAGACTGCTGACACAGAAGATGCTGACACAGAAGTTGCTGACAGGGACTTTCCACGGGGACTTTCCGGGGAGGTGTGGTGAGGGCGGAGTTGGGAGTGGCTAACCCTCAGATGCTGCATATAAGCAGCTGCTTTGCGCCTGTACTGGGTCTCTCCTTGTTGGACCAGATAGAGCCTGGGAGCTCTCAGGCTAGCAGGGGAACCCA
>A2.CD.97.97CDKFE4_AF286240_C.ZA.03.03ZASK072B1_DQ093593
CCAGCCAAAATTACCCTATAGTGCAGAATGCACAAGGGCAAATGGTACACCAGGCCCTATCACCTAGGACTTTAAATGCATGGGTCAAAGTAGTAGAAGAAAAGGCTTTCAGCCCAGAAGTAATACCCATGTTTTCAGCATTATCAGAAGGAGCCACCCCACAAGATTTAAATACTATGCTAAACACGGTGGGGGGACATCAAGCAGCTATGCAAATATTAAAAGATACCATCAATGAGGAAGCTGCAGAATGGGACAGGCTACATCCAGTACATGCAGGGCCTATTCCACCAGGCCAGATGAGAGAACCAAGGGGAAGTGACATAGCAGGAACTACTAGTACCCTTCAGGAACAAATAGGATGGATGACTAGCAACCCACCTATCCCAGTGGGAGAAATCTATAAAAGATGGATAATCCTGGGATTAAATAAGATAGTAAGAATGTATAGCCCTGTCAGTATTTTGGACATAAGACAAGGGCCAAAAGAACCCTTTAGAGACTATGTAGATAGGTTCTTTAAAACTCTCAGAGCTGAGCAAGCTACACAAGAGGTAAAAAACTGGATGACAGACACCTTGCTGGTCCAAAATGCGAACCCAGATTGTAAATCAATCCTGAAAGCATTAGGACCAGGGGCTACATTAGAAGAAATGATGACAGCATGTCAGGGAGTGGGGGGACCCGGCCATAAAGCAAGGGTTTTGGCTGAAGCAATGAGCCAATTACAAAATGCAACTCCAAACATAATGATGCAGAAAGGCAATTTTAGGGGTCAAAAAAGAATCAAATGTTTCAACTGTGGCAAGGAAGGACACCTAGCCAGAAATTGCAGGGCCCCTAGGAAAAAGGGCTGCTGGAAATGTGGGAAGGAAGGACATCAGATGAAAGACTGCACTGAGAGACAGGCTAATTTTTTAGGGAAAATTTGGCCTCCCAACAGAGGGAGGCCAGGAAATTTTCCCCAGAGCAGACCAGAGCCAACAGCCCCACCAGCAGAGGACTTTGGAATGGGGGAAGAGACAAAAAACAGGGAACCGCATACTCCTGCAATTTCCCTCAAATCACTCTTTGGCAGCGACCTCTTGTCACAGTAAAAATAGAAGGACAGCTAAGAGAAGCTCTATTAGATACAGGAGCAGATGATACAGTGTTAGAAGACATAAATTTGCCAGGAAAATGGAAACCAAAAATGATAGGGGGAATTGGAGGTTTTATCAAAGTAAGACAATATGATCAGATAGCTATAGAAATTTGTGGAAAAAGGGCCATAGGTACAGTATTAGTAGGACCTACACCTGTCAACATAATTGGAAGAAATATGTTGGTTCAGCTTGGTTGTACTTTAAATTTTCCAATAAGTCCTATTGAAACTGTACCAGTAAAATTAAAGCCAGGAATGGATGGCCCAAAGGTTAAACAATGGCCATTGACAGAAGAAAAAATAAAAGCATTAACAGAAATTTGTGGAGAAATGGAAAAGGAAGGAAAAATTTCAAAAATTGGGCCTGAAAACCCATACAACACTCCAGTGTTTGCTATAAAGAAAAAAGACAGCACTAAATGGAGAAAATTAGTAGATTTCAGAGAACTCAATAAGAGAACTCAAGACTTTTGGGAAGTTCAGTTAGGAATACCACATCCAGCAGGATTAAAAAAGAAAAAATCAGTAACAGTACTAGATGTGGGGGACGCATATTTTTCCGTTCCCTTAGATGAAGACTTCAGAAAGTATACTGCATTCACCATACCTAGTATAAACAATGAGTCACCAGGAATTAGGTATCAGTACAATGTACTTCCACAGGGATGGAAAGGATCACCATCAATATTCCAGAGTAGCATGACAAAAATTTTAGAGCCCTTTAGATCAAAATATCCAGAGATGGTTATATACCAGTACATGGATGACTTGTATGTAGGATCTGATTTGGAAATAGGTCAGCATAGAGCAAAAATAGAGGAATTAAGGGCTCATTTATTAAGATGGGGATTTACTACACCAGACAAAAAACATCAGAAAGAGCCCCCATTTCTTTGGATGGGATATGAGCTTCATCCTGACAAATGGACAGTCCAGCCTATAAAGCTGCCAGAAAAAGACAGCTGGACTGTCAATGATATACAGAAATTAGTAGGAAAGTTAAATTGGGCAAGTCAGATTTATGCAGGGATTAAAGTAAAGCAACTGTGTAGACTCCTTAGAGGAACCAAAGCACTAACAGACATAGTAACACTGACTAAAGAAGCAGAATTAGAATTGGAAGAGAACAGGGAGATTCTAAAAAACCCTGTACATGGGGTATACTATGACCCATCAAAAGACTTAATAGCAGAAATACAGAAACAAGGGCAAGATCAATGGACATATCAAATTTATCAAGAGCCATTTAAAAATCTAAAAACAGGGAAATATGCAAAAAAGAAATCCACACACACTAATGATGTAAAACAATTAACAGAAGCAGTACAAAAAATAGCCATAGAAAGCATAGTAATATGGGGAAAGACTCCTAAATTTAGATTACCCATACAAAAAGAAACATGGGAGACATGGTGGACGGAGTATTGGCAGGCTACCTGGATTCCTGAGTGGGAGTTTGTTAATACTCCTCCCCTAGTAAAATTATGGTACCAGCTGGAGAAAGAACCCATAGCAGGAGTAGAAACTTTCTATGTAGATGGAGCAGCTAATAGGGACACTAAAATGGGAAAAGCAGGGTATGTTACTGATAGAGGAAGGCAGAAAGTTGTTACCATAAATGAAACAACAAATCAGAAGACTGAATTACAAGCAATTCAGCTAGCTTTGCAAGATTCAGGACCAGAAGTAAATATAGTGACAGATTCACAGTATGCATTAGGAATCATTCAGGCACAACCAGATAGGAGTGAATCAGAGTTAGTCAATCAAATAATAGAAAAGTTAATAGAAAAGGAAAGGGTCTACCTGGCATGGGTACCAGCACACAAAGGGATTGGAGGAAATGAACAGGTAGATAAATTAGTCAGTTCTGGAATCAGGAAAGTGCTATTTTTAGATGGGATAGATAAGGCTCAAGAAGAACATGAAAGATATCACAGTAATTGGAGAGCAATGGCTCAGGACTTTAATCTGCCACCTATAGTAGCAAAAGAAATAGTAGCTAGCTGTGATAAGTGTCAGCTAAAAGGGGAAGCCATGCATGGACAAGTAGATTGTAGTCCAGGAATATGGCAACTAGATTGTACACATCTAGAAGGAAAAGTTATCCTGGTAGCAGTCCATGTAGCCAGTGGCTACATAGAAGCAGAAGTTATTCCAGCAGAGACAGGACAGGAAACAGCATACTTTATATTAAAATTAGCAGGAAGATGGCCAGTAAAAGTGATACATACAGACAATGGGCCCAATTTCACTAGTGCAACAGTCAAGGCAGCCTGTTGGTGGGCAGGTGTCCAACAAGAATTTGGGATTCCCTACAATCCCCAAAGTCAAGGAGTAGTAGAATCTATGAATAAAGAATTAAAGAGAATCATAGGGCAGATAAGAGATCAAGCTGAACACCTTAAGACAGCAGTACAAATGGCAGTATTCATTCACAATTTTAAAAGAAAAGGGGGGATTGGGGGATACAGTGCAGGGGAAAGAATAATAGACATAATAGCAACAGATATACAAACTAAAGAATTACAAAAACAAATTATAAAAATTCAAAATTTTCGGGTTTATTACAGGGACAGCAGGGATCCAATTTGGAAAGGACCAGCAAAACTCCTCTGGAAAGGTGAAGGGGCAGTAGTAATACAAGACAACAGTGATATCAAGGTAGTACCAAGAAGAAAAGCAAAGATCATCAGGGATTATGGAAAACAGATGGCAGGTGATGATTGTGTGGCATGTAGACAGGATGAGGATTAGAACATGGAACAGTTTAGTAAAACATCATATATATGTTTCAAGGAAAGCTAAAGATTGGTCCTATAGACATCACTATGAAAGCAGACATCCAAAAGTAAGTTCAGAAGTACACATCCCGCTAGGGGAGGCTAGATTAGTAGTAAGAACATATTGGGGTCTGCAACCAGGAGAACAAGCCTGGCACTTGGGGCATGGGGTCTCCATAGAATGGAGGCAGAAAAGGTATAGTACACAAATAGACCCTGATCTGGCAGATCATCTAATCCATCTGTATTATTTTGACTGTTTTTCAGAATCTGCCATAAGGAAAGCCATATTAGGAGAAATAGTTAGCCCTAGGTGTGAATATCAAGCAGGACATAACAAGGTAGGATCGCTGCAGTACTTGGCATTGAAAGCATTAGTAGCTCCAACAAGGGCAAAGCCACCTTTACCTAGTGTTAAGAAATTAGTAGAGGATAGATGGAACAAGCCCCAGAAGACCAGGGGCCACAGAGGGAGCCATACAATGAATGGGTGTTAGAACTGTTAGAAGAGCTCAAGCAGGAGGCTGTTAGACATTTCCCTGGGCAGTGGCTACACGGCCTAGGACAACATATCTATAATACCTATGGGGATACTTGGGAAGGAGTTGAAGCTATAACAAGAACTCTGCAACAACTACTGTTTGTCCATTTCAGAATGGGGTGCCATCATAGCAGGATAGGTGTTACGCGACAGAGGAGAGCAAGGAATGGATCCAGTAGACCCTAAATTAGAGCCCTGGAACCATCCGGGAAGTCAGCCTAAAACTGCTTGTACCAAGTGTTATTGTAAAAAGTGTTGCTATCATTGCCCAGTGTGCTTTCTAAACAAGGGCTTAGGCATCTCCTATGGCAGGAAGAAGCGGAGACACCGACGAGGACCTGCTCAAAGCAGTAAGAATCATCAAAATCCTGTACCAAAGCAGTAAGTAGTAGTAATTAATAGATGTAATGATACCTTTAGCAATTTTGTCAATAGTAGGGCTGATAGTAGCATTAATCTTAGCAATAGTTATATGGACTATAGTATTTATAGAATATAGGAAAATTCAGAAGGAAAGGAAAATAGACAGGCTAATCAAGAGAATAAGTGAAAGAGCAGAAGACAGTGGCAATGAGAGTGATGGGGATACAGAGGAATTGTCCACCCTTATGGGGGTGGGAATCTTGCTTTTT
>A2.CY.94.94CY017_41_AF286237_D.UG.99.99UGB25647_AF484481
TTGAAAAGCGAAAGTAACAGGGACTCGAAAGCGAAAGTTCCAGAGGAGTTCTCTCGACGCAGGACTCGGCTTGCTGAGGTGCACACGGCAAGAGGCGAGGGGCGGCGACTGGTGAGTACGCCTAATATTTTTGACTAGCAGAGGCTAGAAGGAGAGAGATGGGTGCGAGAGCGTCAATATTAAGCGGGGGAAAATTAGATGCTTGGGAGAAAATTCGGTTAAGGCCAGGGGGAAAGAAAAAATATAGACTGAAACATTTGGTATGGGCAAGCAGGGAGCTGGAGAAATTCTCAATTAACCCTGGCCTTTTAGAAACACCAGAGGGATGTAGACAAATAATAAGGCAGTTACAACCAGCTCTCCAAACAGGAACAGAAGAACTTAAATCATTATATAATACAGTAGTAGTCCTCTACTGGGTACATCAAAGGGTAGATGTAAAAGACACCAAGGAAGCTCTAGATAAAATAGAGGAAGAACAAAACAAGCAGAAAACACAGCATGCAGCAGCTGACACAGGGAACAGCAGCAGTCAAAATTATCCCATAGTGCAAAATGCACAAGGGCAAATGGTACACCAGGCTATATCACCTAGGACGTTGAATGCCTGGGTCAAAGTAGTAGAAGAAAAGGCTTTCAGCCCAGAAGTAATACCTATGTTTACAGCATTATCAGAAGGAGCCACCCCACAAGACTTAAATACTATGCTAAACACAGTGGGGGGACATCAAGCAGCTATGCAAATGTTAAAAGATACCATCAATGAGGAAGCTGCAGAATGGGACAGGGTACATCCAGTACATGCAGGGCCTATTCCACCAGGCCAGATGAGAGAACCAAGGGGAAGTGACATAGCAGGAACTACTAGTACCCTTCAGGAACAAATAGGTTGGATGACCAGCGATCCACCCATCCCAGTGGGAGAAATTTATAAAAGATGGATAATCCTGGGATTAAATAAAATAGTAAGAATGTATAGCCCTGTCAGCATTTTGGACATAAGACAAGGGCCAAAAGAACCCTTTAGAGATTATGTGGATAGGTTCTTTAAAACTCTAAGAGCTGAGCAAGCCACACAGGAGGTAAAAAACTGGATGACGGACACCTTGCTGGTCCAAAATGCGAACCCAGATTGTAGATCCATCTTGAGAGCATTAGGACCAGGGGCCTCATTAGAAGAAATGATGACAGCATGTCAGGGAGTGGGAGGACCCAGCCATAAAGCAAGGGTTTTGGCTGAAGCAATGAGCCATGTACAAAGTACAAATACAAACATAATGATGCAGAGAGGCAATTTTAGGGGTCAAAAAAGAATTAAGTGTTTCAACTGTGGCAAGGAAGGACACCTAGCCAGAAATTGCAGGGCCCCTAGGAAAAAGGGCTGCTGGAAATGTGGAAAGGAAGGACATCAAATGAAAGATTGCACTGAGAGACAGGCTAATTTTTTAGGGAAAATTTGGCCTTCCAACAAGGGAAGGCCAGGGAATTTCCTTCAGAGCAGACCAGAGCCAACTGCCCCGCCAGCGGAGAGCTTCGGGTTTGGGGAGGAGATAGCCCCCTCTCAGAAACAGAAGCAGGAAGACAAGGAGCTATATCCTTTAGCTTCCCTCAAATCACTCTTTGGCAACGACCCCTCGTCACAGTAAAGATAGGGGGACAGTTAAAGGAAGCTCTATTAGATACAGGAGCAGATGATACAGTAGTAGAAGAAATAAATTTGCCAGGAAAATGGAAACCAAAAATGATAGGGGGAATTGGAGGTTTTATCAAAGTAAGACAATATGATCAGATAGCTATAGAAATTTGTGGAAAAAGGGCCATAGGTACAGTATTAGTAGGACCTACCCCTGTCAACATAATCGGAAGAAATATGTTGGTTCAGCTTGGTTGTACTTTAAATTTTCCAATTAGTCCTATTGAAACTGTACCAGTAAAATTAAAGCCAGGAATGGATGGTCCAAAGGTTAAACAATGGCCATTGACAGAAGAAAAAATAAAAGCATTAACAGAAATCTGTAAAGAAATGGAAAAGGAAGGAAAAATTTCAAAAATTGGGCCTGAAAATCCATACAACACTCCAGTGTTTGCTATAAAGAAAAAAGACAGCACTAAATGGAGAAAATTAGTAGATTTTAGAGAACTCAATAAGAGAACTCAAGACTTCTGGGAAGTTCAGTTAGGAATACCACATCCAGCAGGATTAAAAAAGAAAAAAGCAGTAACAGTACTTGATGTGGGGGACGCATATTTTTCCGTTCCCTTACATGAAGACTTCAGAAAATATACTGCATTCACCATACCTAGTACCAACAATGAGACACCAGGAGTTAGGTATCAGTACAATGTACTTCCACAGGGATGGAAAGGATCACCAGCAATATTCCAGAGTAGCATGACAAAGATCTTAGAGCCCTTTAGATCAAAGAATACAGAATTAATCATCTACCAATACATGGATGACTTGTATGTAGGATCTGATTTAGAAATAAGCCAGCATAGAGTAAAAATAGAGGAATTAAGGGCTCACTTATTGAAATGGGGATTTTATACACCAGACAAAAAACATCAGAAAGAACCTCCATTTCTTTGGATGGGATATGAGCTTCATCCTGACAAATGGACAGTCCAGCCTATAAAGCTGCCAGAAAAAGACAGCTGGACTGTCAATGATATACAGAAATTAGTAGGGAAATTAAATTGGGCAAGTCAGATTTATGCAGGGATTAAAGTAAAGCAACTGTGTAAACTCCTTAGAGGAGCCAAAGCACTAACAGACATAGTAACACTGACTAAAGAAGCAGAGTTAGAATTAGAAGAGAACAGGGAAATTTTAAAAACCCCTGTACATGGGGTATACTATGACCCATCAAAAGACTTAATAGCAGAAATACAGAAACAAGGGCAAGACCAATGGACATATCAAATTTATCAGGAACCCTTTAAGAATCTGAAAACAGGGAAATATGCAAAAAGGAGGTCCACCCACACTAATGATATAAAACAGTTAACAGAAGCAGTACAAAAAATAACCATGGAAAGCATAGTGATATGGGGAAAGACTCCTAAATTTAAATTACCCATACAAAAGGAAACATGGGAGACATGGTGGGCGGAGTATTGGCAGGCTACCTGGATTCCTGAGTGGGAGTTTGTCAATACCCCTCCTCTAGTAAAACTGTGGTACCAGTTAGAAAAAGAACCCATAGCAGGAGCAGAAACTTTCTATGTAGATGGGGCAGCTAATAGAGAGACTAAACTAGGAAAGGCAGGGTATGTCACTGACAGAGGAAGACAAAAAATTGTCTCCCTGACGGAGACAACAAATCAAAAGACTGAATTACATGCAATCTATTTGGCTTTACAGGATTCAGGATTAGAAGTGAACATAGTGACAGATTCACAGTATGCATTAGGAATCATTCAAGCACAACCAGAAAGGAGTGAATCAGAGATAGTCAATCAAATAATAGAAAAATTAATAGAAAAGGAAAGGGTCTACCTATCATGGGTACCAGCACACAAAGGGATTGGAGGAAATGAACAAGTAGACAAATTAGTCAGTTCTGGAATCAGGAAAGTGCTATTTTTAGATGGGATAGATAAGGCTCAAGAGGAACATGAAAGATATCACAGCAATTGGAGAGCAATGGCTCATGACTTTAATCTACCACCTGTAGTAGCAAAAGAAATAGTAGCTAGCTGTGATAAATGTCAGCTAAAAGGGGAAGCCATGCATGGACAAGTAGACTGTAGTCCAGGAATATGGCAACTAGATTGCACACATCTTGAAGGAAAAGTTATCCTGGTGGCAGTCCATGTGGCCAGTGGCTATATAGAAGCAGAAGTCATCCCAACAGAAACAGGACAGGATACAGCATACTTTATATTAAAACTAGCAGGAAGATGGCCAGTAAAAGTAATACATACAGACAATGGGCCCAATTTCATCAGTGCAACAGTTAAGGCAGCCTGTTGGTGGGCAGGTATCCAACAAGAATTTGGGATTCCCTACAATCCCCAAAGTCAAGGAGTAGTGGAATCTATGAATAAAGAATTAAAGAAAATCATAGGGCAGGTAAGAGATCAAGCTGAACACCTTAAGACAGCAGTACAAATGGCAGTATTCATTCACAATTTTAAAAGAAAAGGGGGGATTGGGGGATACAGTGCAGGGGAAAGAATAATAGACATAATAGCAACAGATATACAAACTAAAGAACTACAAAGACAAATTACAAAAATTCAAAATTTTCGGGTTTATTACAGGGACAGCAGAGATCCAATTTGGAAAGGACCAGCAAAACTCCTTTGGAAAGGTGAAGGGGCAGTAGTAATACAAGACAATAGTGACATAAAGGTAGTACCAAGAAGAAAAGCAAAGATCATTAGGGATTATGGAAAACAGATGGCAGGTGATGATTGTGTGGCAGGTAGACAGGATGAGGATTAGAACATGGAACAGTTTAGTTAAACATCATATGTATATTTCAAGGAAAGCTAAAGGTTGGGTCTATAAACATCACTATGAAAGCAGAAATCCAAGAATAAGTTCAGAAGTACACATCCCGCTAGGGGAGGCTAGAATAATAGTAAGAACATATTGGGGTCTGCACATAGGAGAAAAAGACTGGCACTTGGGTCATGGAGTCTCCATAGAATGGAGGCAAAACAGGTATCATACACAAATAGACCCTGATCTGGCAGACCATCTAATCCATCTGTATTATTTTGACTGTTTTTCAGAATCTGCCATAAGGAAAGCCATAATAGGAGAAATAGTTAGTCCTAGGTGTGAATATCAAGCAGGACATAACAAGGTAGGGTCTCTGCAATATTTGGCATTGAAAGCAGTAGTAGCTTCAACAAGGACAAAGCCACCTTTGCCTAGTGTTAGGAAATTAGTAGAGGATAGATGGAACAAGCCCCAGAAGACCAAGGGCCACAGAGGGAGCCATACAATGAATGGATGTTAGAACTGTTAGAGGAGCTCAAGCAGGAAGCTGTTAGACATTTCCCTAGGCACTGGCTACATGGCCTAGGACAATACATCTATAATACCTATGGGGATACCTGGGAAGGAGTTGAAGTTATCATAAGATATCTGCAACAACTACTGTTTGTCCATTTCAGAATTGGGTGCCAACATAGCAGGATAGGCATTATTCGAAGAAGAAGAGTAAGGGATGGAGCCAGTAGACCCTAAACTAGAGCCCTGGAACCATCCGGGAAGTCAGCCTAAAACTGCTTGTACCAAATGTTATTGTAAACGCTGTTGCTATCATTGCCAGTTGTGCTTTATAAACAAAGGCTTAGGCATCTCCTACGGCAGGAAGAAGCGACGACCCCGACGAAAGCCTTCTCCAAGCAATAAGGACCATCAAAATCCTATACCAAAGCAGTAAGTAGTAGTAATTAATATATGTAATGTTACCTTTAGTAATATTGGCAATAGTAGGACTGATAGTAGCTTTAATCTTAGCAATAGTTGTATGGACTATAGTATTCATAGAATATAAGAAAATTAAGAAGCAAAGGAAAATAGACTGGTTAATCAAAAGAATAAGTGAGAGAGCAGAAGACAGTGGCAATGAGAGTGATGGGGACACAGAGGAACTATCAGCACTTGTGGAGAGGGGGCATCTTGATTTTGGGGATGTTAATAATGTGTAAAGCTACAGATTTGTGGGTCACAGTATACTATGGAGTACCTGTGTGGAAAGATGCAGATACCATCCTATTTTGTGCATCAGATGCTAAAGCATATGATACAGAAGTGCATAATGTATGGGCCACACATGCCTGTGTACCCACAGACCCCAACCCACAAGAAATAAACCTGGAAAATGTAACAGAAAATTTTAATATGTGGAAAAATAACATGGTAGAGCAGATGCAAGAAGATATAATCAGCTTATGGGATCAAAGCCTAAAGCCATGTGTAAAATTAACCCCGCTCTGCGTCATTTTAAATTGTAGCAATGCCAATACCAGCACCCATAGCAATAGCAGTAGCACCCAGAGCCCCATTAATGAAGAAATAAAAAACTGCTCTTACAATACTACCACAATACTAAGAGATAAGACACAAAAAGTTTATTCACTGTTTTATAGACTTGATGTAGTACAACTTGATGAAAGTGAAAATAAGAATACATCAGGTAGTAATACTCTGTATAGACTAATAAATTGTAATACCTCAACCATCACACAAGCGTGTCCAAAGGTAACCTTTGAGCCAATTCCTATACATTATTGTGCCCCAGCTGGTTTTGCGATTCTAAAGTGTAAGGATCCGAGATTCAATGGAACAGGGTCATGCAAGAATGTTAGCTCAGTACAATGTACACATGGAATTAAACCAGTAGCATCAACTCAACTGCTGTTGAATGGCAGTCTAGCAGAAGGAGGGAAAATAATGATTAGATCTGAAAATATTACAAACAATGCCAAAAACATAATAGTTCAGTTTACTAAGCCTGTACTAATTACTTGTATCAGACCCAACAACAATACAAGAAAAAGTATACGCTTTGGACCAGGACAAGCCTTCTATACAAATGAAATAATAGGGGACATAAGACAAGCACATTGTAATATCAACAAAACATTATGGAATGACACTTTACAAAAGGTAGCTGAACAATTAAGAGAGAAATTCCCTAAGAAAACCATAATCTTTACTAACTCCTCAGGAGGGGACCCAGAAATTACAACACTTAGTTTTAATTGTGCAGGAGAATTTTTCTATTGCAATACAACAGGCCTGTTTAATGGTACGTGGTGGAACAATGGTACGTGGAACGGGCCCTACACACCTAATAACACCAATGGAAGTATAATCCTCCCATGCAGAATAAAACAAATTATAAACATGTGGCAGAGAGTAGGAAGAGCAATGTATGCCCCTCCCATTGCAGGAATAATAAAGTGTACATCAAACATTACAGGAATAATATTGACAAGAGATGGTGGTAACAATGGGACTAATGAGACCTTCAGACCTGGAGGAGGAGATATGAGGGACAATTGGAGAAGTGAATTATATAAATATAAAGTAGTAAAACTTGAACCACTAGGAGTAGCACCTACCAGGGCAAAAAGAAGAGTGGTGGAGAGAGAAAAAAGAGCAGTTGGACTGGGAGCTGTCTTCCTTGGGTTCTTGGGAGCAGCAGGAAGCACTATGGGCGCGGCGTCACTAACGCTGACGGTACAGGCCAGACAATTATTGTCTGGTATAGTGCAACAGCAAAGCAATTTGCTGCAGGCTATAGAAGCTCAACAGCATCTGTTGAAACTCACAGTCTGGGGCATTAAACAGCTCCAGGCGAGGGTCCTGGCTGTGGAAAGATACCTAAAGGATCAACAGCTCCTGGGAATTTGGGGCTGCTCTGGAAAACTCATCTGCGCCACTACTGTGCCCTGGAACACTAGTTGGAGTAATAAGTCTCAGGATGAGATTTGGGACAACATGACCTGGTTGCAATGGGATAAAGAAATTAGCAATTACACAAACATAATATATAGGTTACTTGAAGAATCGCAAAACCAGCAGGAAAAGAATGAGCAAGACTTATTGGCATTAGACAAATGGGCAGATTTGTGGAGTTGGTTCAACATTTCACACTGGCTGTGGTATATAAGAATATTTATAATGATAGTAGGAGGCTTGATAGGATTAAGAATAGTTTTTGCTATAATTACTGTAGTAAATAGAGTTAGGCAGGGATACTCACCTGTGTCATTTCAGATCCCTACCCCAAGCCCAGAGGGTCCCGACAGGCCCAGAGGAACCGAAGAAGGAGGTGGAGAGCAAGGCAGAGACAGATCGATTCGATTAGTGAACGGGTTCTTCGCACTTGCCTGGGACGACCTACGGAGCCTGTGCCTCTTCAGTTACCACCGCTTGAGAGATTGCATATTGATTGCAGCGAGGACTGTGGAACTTCTGGGACACTGCAGTCTCAAGGGACTGAGACTGGGGTGGGAAGGTCTCAAGAATCTGTGGAATCTTCTGTTATACTGGGGTCGGGAACTGAAGAATAGTGCTATTAGCTTATTTGATACTATAGCAGTAGCAGTAGCTGAGTGGACAGATAGGGTTATAGAAATAGGGCAAAGAGCTTTCAGAGCTATTCTCAACATACCTAGAAGAATCAGACAGGGCTTAGAAAGGGCTTTACTATAAAATGGGGGGCAAGTGGTCAAAAAGGAGCATACCAGGATGGCCTGCTATTAGGGAGAGAATGAGAAGAACTCCTCCAACAGCACAAAGAACAGAAGCAGTGTCTCCAGCAGCACCAGGAGTAGGAGCAGTGTCTCAAGATTTAGCTACTCATGGAGCAGTCACAAGCAGTAATACAGCAGCTACTAATCCTGATTGCGCCTGGGTGGAAGCGCAAGAAGAGGAGAGTGAAGTAGGCTTCCCAGTCAGGCCACAGGTACCTTTAAGGCCAATGACCTTCAAGGGAGCGTTTGATCTCAGCTTCTTTTTAAAAGAAAAGGGGGGACTGGATGGGTTAATTTACTCCCAGAAAAGACAAGACATCCTTGATATGTGGGTCTACCACACACAAGGCTACTTCCCTGATTGGCAGAATTACACACCAGGGCCAGGGATCAGATACCCATTAACATTTGGATGGTGCTTCAAGCTAGTACCAGTAGAGCCATCTGAGGTAGAAGAAGCTACTCAGGGAGAGAACAACAGCTTATTACACCCTATATGCCAACATGGAGTAGATGACCCTGAAAGAGAAGTGTTAAGATGGGAGTTTGATAGAAGCCTGGCACGGAGACACAGAGCCCGAGAGCTGCATCCGGAGTACTACAAAGACTGCTGACACAGAAGTTGCTGACGGGGACTTTCCGCTGGGGACTTTCCAGGGAGGTGTGGTGTGGGCGGAGTTGGGGAGTGGCTAACCCTCAGATGCTGCATATAAGCAGCTGCTTCTCGCATGTACTGGGTCTCTCTTGTTGGACCAGATAGAGCCCGGGAGCTCTCTGGCTAGCAGGGGAACCCACTGCTTAAGCCTCAATAAAGCTTGCCTTGAGAGCTTC
>A2.CY.94.94CY017_41_AF286237_F1.BE.93.VI850_AF077336
TTGAAAAGCGAAAGTAACAGGGACTCGAAAGCGAAAGTTCCAGAGGAGTTCTCTCGACGCAGGACTCGGCTTGCTGAGGTGCACACGGCAAGAGGCGAGGGGCGGCGACTGGTGAGTACGCCTAATATTTTTGACTAGCAGAGGCTAGAAGGAGAGAGATGGGTGCGAGAGCGTCAATATTAAGCGGGGGAAAATTAGATGCTTGGGAGAAAATTCGGTTAAGGCCAGGGGGAAAGAAAAAATATAGACTGAAACATTTGGTATGGGCAAGCAGGGAGCTGGAGAAATTCTCAATTAACCCTGGCCTTTTAGAAACACCAGAGGGATGTAGACAAATAATAAGGCAGTTACAACCAGCTCTCCAAACAGGAACAGAAGAACTTAAATCATTATATAATACAGTAGTAGTCCTCTACTGGGTACATCAAAGGGTAGATGTAAAAGACACCAAGGAAGCTCTAGATAAAATAGAGGAAGAACAAAACAAGCAGAAAACACAGCATGCAGCAGCTGACACAGGGGTCAGTCAAAATTACCCTATAGTACAGAATCTTCAGGGACAAATGGTACACCAGTCTCTATCACCTAGAACTTTAAATGCATGGGTAAAGGTGATAGAAGAGAAGGCTTTTAGCCCAGAAGTAATACCCATGTTTTCAGCATTATCAGAAGGGGCCACTCCCACAGATTTAAACACCATGCTAAATACAGTGGGGGGACATCAAGCAGCCATGCAAATGTTAAAAGACACCATCAATGAGGAAGCTGCAGAATGGGACAGGGTACATCCAGTACATGCAGGGCCTATTCCACCAGGCCAGATGAGAGAACCAAGGGGAAGTGACATAGCAGGAACTACTAGTACCCTTCAGGAACAAATAGGTTGGATGACCAGCGATCCACCCATCCCAGTGGGAGAAATTTATAAAAGATGGATAATCCTGGGATTAAATAAAATAGTAAGAATGTATAGCCCTGTCAGCATTTTGGACATAAGACAAGGGCCAAAAGAACCCTTTAGAGATTATGTGGATAGGTTCTTTAAAACTCTAAGAGCTGAGCAAGCCACACAGGAGGTAAAAAACTGGATGACGGACACCTTGCTGGTCCAAAATGCGAACCCAGATTGTAGATCCATCTTGAGAGCATTAGGACCAGGGGCCTCATTAGAAGAAATGATGACAGCATGTCAGGGAGTGGGAGGACCCAGCCATAAAGCAAGGGTTTTGGCTGAAGCAATGAGCCATGTACAAAGTACAAATACAAACATAATGATGCAGAGAGGCAATTTTAGGGGTCAAAAAAGAATTAAGTGTTTCAACTGTGGCAAGGAAGGACACCTAGCCAGAAATTGCAGGGCCCCTAGGAAAAAGGGCTGCTGGAAATGTGGAAAGGAAGGACATCAAATGAAAGATTGCACTGAGAGACAGGCTAATTTTTTAGGGAAAATTTGGCCTTCCAACAAAGGGAGGCCAGGAAATTTTCCTCAGAGCAGAACAGAGCCAACAGCCCCACCAGCAGAGAACTTGAGAATGGGGGAAGAGATAACCTCCTCCCTGAAGCAGGAACTGGAGACCAGGGAACCATACAATCCTGCAATTTCCCTCAAATCACTCTTTGGCAACGACCCCTTGTTACAGTAAAGATAGAGGGACAGCTAAAAGAAGCTCTATTAGATACAGGAGCAGATGATACAGTGTTAGAAGAAATAAATTTGCCAGGAAAATGGAAACCAAAAATGATAGGGGGAATTGGAGGTTTTATCAAAGTAAGACAATATGATCAGATAGCTATAGAAATTTGTGGAAAAAGGGCCATAGGTACAGTATTAGTAGGACCTACCCCTGTCAACATAATCGGAAGAAATATGTTGGTTCAGCTTGGTTGTACTTTAAATTTTCCAATTAGTCCTATTGAAACTGTACCAGTAAAATTAAAGCCAGGAATGGATGGTCCAAAGGTTAAACAATGGCCATTGACAGAAGAAAAAATAAAAGCATTAACAGAAATCTGTAAAGAAATGGAAAAGGAAGGAAAAATTTCAAAAATTGGGCCTGAAAATCCATACAACACTCCAGTGTTTGCTATAAAGAAAAAAGACAGCACTAAATGGAGAAAATTAGTAGATTTTAGAGAACTCAATAAGAGAACTCAAGACTTCTGGGAAGTTCAGTTAGGAATACCACATCCAGCAGGATTAAAAAAGAAAAAAGCAGTAACAGTACTTGATGTGGGGGACGCATATTTTTCCGTTCCCTTACATGAAGACTTCAGAAAATATACTGCATTCACCATACCTAGTACCAACAATGAGACACCAGGAGTTAGGTATCAGTACAATGTACTTCCACAGGGATGGAAAGGATCACCAGCAATATTCCAGAGTAGCATGACAAAGATCTTAGAGCCCTTTAGATCAAAGAATACAGAATTAATCATCTACCAATACATGGATGACTTGTATGTAGGATCTGATTTAGAAATAAGCCAGCATAGAGTAAAAATAGAGGAATTAAGGGCTCACTTATTGAAATGGGGATTTTATACACCAGACAAAAAACATCAGAAAGAACCTCCATTTCTTTGGATGGGATATGAGCTTCATCCTGACAAATGGACAGTCCAGCCTATAAAGCTGCCAGAAAAAGACAGCTGGACTGTCAATGATATACAGAAATTAGTAGGGAAATTAAATTGGGCAAGTCAGATTTATGCAGGGATTAAAGTAAAGCAACTGTGTAAACTCCTTAGAGGAGCCAAAGCACTAACAGACATAGTAACACTGACTAAAGAAGCAGAGTTAGAATTAGAAGAGAACAGGGAAATTTTAAAAACCCCTGTACATGGGGTATACTATGACCCATCAAAAGACTTAATAGCAGAAATACAGAAACAAGGGCAAGACCAATGGACATATCAAATTTATCAGGAACCCTTTAAGAATCTGAAAACAGGGAAATATGCAAAAAGGAGGTCCACCCACACTAATGATATAAAACAGTTAACAGAAGCAGTACAAAAAATAACCATGGAAAGCATAGTGATATGGGGAAAGACTCCTAAATTTAAATTACCCATACAAAAGGAAACATGGGAGACATGGTGGGCGGAGTATTGGCAGGCTACCTGGATTCCTGAGTGGGAGTTTGTCAATACCCCTCCTCTAGTAAAACTGTGGTACCAGTTAGAAAAAGAACCCATAGCAGGAGCAGAAACTTTCTATGTAGATGGGGCAGCTAATAGAGAGACTAAACTAGGAAAGGCAGGGTATGTCACTGACAGAGGAAGACAAAAAATTGTCTCCCTGACGGAGACAACAAATCAAAAGACTGAATTACATGCAATCTATTTGGCTTTACAGGATTCAGGATTAGAAGTGAACATAGTGACAGATTCACAGTATGCATTAGGAATCATTCAAGCACAACCAGAAAGGAGTGAATCAGAGATAGTCAATCAAATAATAGAAAAATTAATAGAAAAGGAAAGGGTCTACCTATCATGGGTACCAGCACACAAAGGGATTGGAGGAAATGAACAAGTAGACAAATTAGTCAGTTCTGGAATCAGGAAAGTGCTATTTTTAGATGGGATAGATAAGGCTCAAGAGGAACATGAAAGATATCACAGCAATTGGAGAGCAATGGCTCATGACTTTAATCTACCACCTGTAGTAGCAAAAGAAATAGTAGCTAGCTGTGATAAATGTCAGCTAAAAGGGGAAGCCATGCATGGACAAGTAGACTGTAGTCCAGGAATATGGCAACTAGATTGCACACATCTTGAAGGAAAAGTTATCCTGGTGGCAGTCCATGTGGCCAGTGGCTATATAGAAGCAGAAGTCATCCCAACAGAAACAGGACAGGATACAGCATACTTTATATTAAAACTAGCAGGAAGATGGCCAGTAAAAGTAATACATACAGACAATGGGCCCAATTTCATCAGTGCAACAGTTAAGGCAGCCTGTTGGTGGGCAGGTATCCAACAAGAATTTGGGATTCCCTACAATCCCCAAAGTCAAGGAGTAGTGGAATCTATGAATAAAGAATTAAAGAAAATCATAGGGCAGGTAAGAGATCAAGCTGAACACCTTAAGACAGCAGTACAAATGGCAGTATTCATTCACAATTTTAAAAGAAAAGGGGGGATTGGGGGATACAGTGCAGGGGAAAGAATAATAGACATAATAGCAACAGATATACAAACTAAAGAACTACAAAGACAAATTACAAAAATTCAAAATTTTCGGGTTTATTACAGGGACAGCAGAGATCCAATTTGGAAAGGACCAGCAAAACTCCTTTGGAAAGGTGAAGGGGCAGTAGTAATACAAGACAATAGTGACATAAAGGTAGTACCAAGAAGAAAAGCAAAGATCATTAGGGATTATGGAAAACAGATGGCAGGTGATGATTGTGTGGCAGGTAGACAGGATGAGGATTAGAACATGGAACAGTTTAGTTAAACATCATATGTATATTTCAAGGAAAGCTAAAGGTTGGGTCTATAAACATCACTATGAAAGCAGAAATCCAAGAATAAGTTCAGAAGTACACATCCCGCTAGGGGAGGCTAGAATAATAGTAAGAACATATTGGGGTCTGCACATAGGAGAAAAAGACTGGCACTTGGGTCATGGAGTCTCCATAGAATGGAGGCAAAACAGGTATCATACACAAATAGACCCTGATCTGGCAGACCATCTAATCCATCTGTATTATTTTGACTGTTTTTCAGAATCTGCCATAAGGAAAGCCATAATAGGAGAAATAGTTAGTCCTAGGTGTGAATATCAAGCAGGACATAACAAGGTAGGGTCTCTGCAATATTTGGCATTGAAAGCAGTAGTAGCTTCAACAAGGACAAAGCCACCTTTGCCTAGTGTTAGGAAATTAGTAGAGGATAGATGGAACAAGCCCCAGAAGACCAAGGGCCACAGAGGGAGCCATACAATGAATGGATGTTAGAACTGTTAGAGGAGCTCAAGCAGGAAGCTGTTAGACATTTCCCTAGGCACTGGCTACATGGCCTAGGACAATACATCTATAATACCTATGGGGATACCTGGGAAGGAGTTGAAGTTATCATAAGATATCTGCAACAACTACTGTTTGTCCATTTCAGAATTGGGTGCCAACATAGCAGGATAGGCATTATTCGAAGAAGAAGAGTAAGGGATGGAGCCAGTAGACCCTAAACTAGAGCCCTGGAACCATCCGGGAAGTCAGCCTAAAACTGCTTGTACCAAATGTTATTGTAAACGCTGTTGCTATCATTGCCAGTTGTGCTTTATAAACAAAGGCTTAGGCATCTCCTACGGCAGGAAGAAGCGACGACCCCGACGAAAGCCTTCTCCAAGCAATAAGGACCATCAAAATCCTATACCAAAGCAGTAAGTAGTAGTAATTAATATATGTAATGTTACCTTTAGTAATATTGGCAATAGTAGGACTGATAGTAGCTTTAATCTTAGCAATAGTTGTATGGACTATAGTATTCATAGAATATAAGAAAATTAAGAAGCAAAGGAAAATAGACTGGTTAATCAAAAGAATAAGTGAGAGAGCAGAAGACAGTGGCAATGAGAGTGATGGGGACACAGAGGAACTATCAGCACTTGTGGAGAGGGGGCATCTTGATTTTGGGGATGTTAATAATGTGTAAAGCTACAGATTTGTGGGTCACAGTATACTATGGAGTACCTGTGTGGAAAGATGCAGATACCATCCTATTTTGTGCATCAGATGCTAAAGCATATGATACAGAAGTGCATAATGTATGGGCCACACATGCCTGTGTACCCACAGACCCCAACCCACAAGAAATAAACCTGGAAAATGTAACAGAAAATTTTAATATGTGGAAAAATAACATGGTAGAGCAGATGCAAGAAGATATAATCAGCTTATGGGATCAAAGCCTAAAGCCATGTGTAAAATTAACCCCGCTCTGCGTCATTTTAAATTGTAGCAATGCCAATACCAGCACCCATAGCAATAGCAGTAGCACCCAGAGCCCCATTAATGAAGAAATAAAAAACTGCTCTTACAATACTACCACAATACTAAGAGATAAGACACAAAAAGTTTATTCACTGTTTTATAGACTTGATGTAGTACAACTTGATGAAAGTGAAAATAAGAATACATCAGGTAGTAATACTCTGTATAGACTAATAAATTGTAATACCTCAACCATCACACAAGCGTGTCCAAAGGTAACCTTTGAGCCAATTCCTATACATTATTGTGCCCCAGCTGGTTTTGCGATTCTAAAGTGTAAGGATCCGAGATTCAATGGAACAGGGTCATGCAAGAATGTTAGCTCAGTACAATGTACACATGGAATTAAACCAGTAGCATCAACTCAACTGCTGTTGAATGGCAGTCTAGCAGAAGGAGGGAAAATAATGATTAGATCTGAAAATATTACAAACAATGCCAAAAACATAATAGTTCAGTTTACTAAGCCTGTACTAATTACTTGTATCAGACCCAACAACAATACAAGAAAAAGTATACGCTTTGGACCAGGACAAGCCTTCTATACAAATGAAATAATAGGGGACATAAGACAAGCACATTGTAATATCAACAAAACATTATGGAATGACACTTTACAAAAGGTAGCTGAACAATTAAGAGAGAAATTCCCTAAGAAAACCATAATCTTTACTAACTCCTCAGGAGGGGACCCAGAAATTACAACACTTAGTTTTAATTGTGCAGGAGAATTTTTCTATTGCAATACAACAGGCCTGTTTAATGGTACGTGGTGGAACAATGGTACGTGGAACGGGCCCTACACACCTAATAACACCAATGGAAGTATAATCCTCCCATGCAGAATAAAACAAATTATAAACATGTGGCAGAGAGTAGGAAGAGCAATGTATGCCCCTCCCATTGCAGGAATAATAAAGTGTACATCAAACATTACAGGAATAATATTGACAAGAGATGGTGGTAACAATGGGACTAATGAGACCTTCAGACCTGGAGGAGGAGATATGAGGGACAATTGGAGAAGTGAATTATATAAATATAAAGTAGTAAAACTTGAACCACTAGGAGTAGCACCTACCAGGGCAAAAAGAAGAGTGGTGGAGAGAGAAAAAAGAGCAGTTGGACTGGGAGCTGTCTTCCTTGGGTTCTTGGGAGCAGCAGGAAGCACTATGGGCGCGGCGTCACTAACGCTGACGGTACAGGCCAGACAATTATTGTCTGGTATAGTGCAACAGCAAAGCAATTTGCTGCAGGCTATAGAAGCTCAACAGCATCTGTTGAAACTCACAGTCTGGGGCATTAAACAGCTCCAGGCGAGGGTCCTGGCTGTGGAAAGATACCTAAAGGATCAACAGCTCCTGGGAATTTGGGGCTGCTCTGGAAAACTCATCTGCGCCACTACTGTGCCCTGGAACACTAGTTGGAGTAATAAGTCTCAGGATGAGATTTGGGACAACATGACCTGGTTGCAATGGGATAAAGAAATTAGCAATTACACAAACATAATATATAGGTTACTTGAAGAATCGCAAAACCAGCAGGAAAAGAATGAGCAAGACTTATTGGCATTAGACAAATGGGCAGATTTGTGGAGTTGGTTCAACATTTCACACTGGCTGTGGTATATAAGAATATTTATAATGATAGTAGGAGGCTTGATAGGATTAAGAATAGTTTTTGCTATAATTACTGTAGTAAATAGAGTTAGGCAGGGATACTCACCTGTGTCATTTCAGATCCCTACCCCAAGCCCAGAGGGTCCCGACAGGCCCAGAGGAACCGAAGAAGGAGGTGGAGAGCAAGGCAGAGACAGATCGATTCGATTAGTGAACGGGTTCTTCGCACTTGCCTGGGACGACCTACGGAGCCTGTGCCTCTTCAGTTACCACCGCTTGAGAGATTGCATATTGATTGCAGCGAGGACTGTGGAACTTCTGGGACACTGCAGTCTCAAGGGACTGAGACTGGGGTGGGAAGGTCTCAAGAATCTGTGGAATCTTCTGTTATACTGGGGTCGGGAACTGAAGAATAGTGCTATTAGCTTATTTGATACTATAGCAGTAGCAGTAGCTGAGTGGACAGATAGGGTTATAGAAATAGGGCAAAGAGCTTTCAGAGCTATTCTCAACATACCTAGAAGAATCAGACAGGGCTTAGAAAGGGCTTTACTATAAAATGGGGGGCAAGTGGTCAAAAAGGAGCATACCAGGATGGCCTGCTATTAGGGAGAGAATGAGAAGAACTCCTCCAACAGCACAAAGAACAGAAGCAGTGTCTCCAGCAGCACCAGGAGTAGGAGCAGTGTCTCAAGATTTAGCTACTCATGGAGCAGTCACAAGCAGTAATACAGCAGCTACTAATCCTGATTGCGCCTGGGTGGAAGCGCAAGAAGAGGAGAGTGAAGTAGGCTTCCCAGTCAGGCCACAGGTACCTTTAAGGCCAATGACCTTCAAGGGAGCGTTTGATCTCAGCTTCTTTTTAAAAGAAAAGGGGGGACTGGATGGGTTAATTTACTCCCAGAAAAGACAAGACATCCTTGATATGTGGGTCTACCACACACAAGGCTACTTCCCTGATTGGCAGAATTACACACCAGGGCCAGGGATCAGATACCCATTAACATTTGGATGGTGCTTCAAGCTAGTACCAGTAGAGCCATCTGAGGTAGAAGAAGCTACTCAGGGAGAGAACAACAGCTTATTACACCCTATATGCCAACATGGAGTAGATGACCCTGAAAGAGAAGTGTTAAGATGGGAGTTTGATAGAAGCCTGGCACGGAGACACAGAGCCCGAGAGCTGCATCCGGAGTACTACAAAGACTGCTGACACAGAAGTTGCTGACGGGGACTTTCCGCTGGGGACTTTCCAGGGAGGTGTGGTGTGGGCGGAGTTGGGGAGTGGCTAACCCTCAGATGCTGCATATAAGCAGCTGCTTCTCGCATGTACTGGGTCTCTCTTGTTGGACCAGATAGAGCCCGGGAGCTCTCTGGCTAGCAGGGGAACCCACTGCTTAAGCCTCAATAAAGCTTGCCTTGAGAGCTTC
>A2.CD.97.97CDKS10_AF286241_F2.CM.95.MP255_AJ249236
AGCTATAAGAGAGACTTAATTAGGAAAAGCAGGATTTGTCACTGACAGAGGAAGACAAAAAATTGTCTCCCTGACGGAGACAACAAATCAAAAGACTGAATTACATGCAATCTATTTAGCTTTACAGGATTCAGAATTAGAAGTAAACATAGTAACAGATTCACAGTATGCATTAGGAATCATTCAGGCACAACCAGATAGGAGTGAATCAGAGTTAGTCAATCAAATAATAGAAAAGTTAATAGAAAAAGAGAGGGTCTACCTGTCATGGGTACCAGCACACAAGGGGATTGGAGGAAATGAACAGGTAGACAAATTAGTCAGTTCTGGAATCAGGAAAGTGTTATTTTTAGATGGAATAGATAAAGCTCAAGAAGAACATGAAAGATATCACAGCAATTGGAGAGCCATGGCTCATGACTTTAATCTGCCACCTATAGTAGCAAAAGAAATAGTAGCTAGTTGTGACAAATGTCAGCTAAAAGGGGAAGCCATGCATGGACAAGTAGACTGTAGCCCAGGAATATGGCAACTAGATTGCACACATCTAGAAGGAAAAGTTATCCTGGTAGCAGTCCATGTAGCCAGTGGCTATATAGAAGCAGAAGTCATTCCAGCAGAAACAGGACAGGAAACAGCATACTTTATATTAAAACTAGCAGGAAGATGGCCAGTAAAAGTAATACATACTGACAATGGGTCCAATTTCACCAGTGCAACAGTTAAGGCAGCCTGTTGGTGGGCAGGAGTCCAACAGGAATTTGGAATTCCCTACAATCCCCAAAGTCAAGGAGTAGTGGAATCTATGAACAAAGAATTAAAGAAAATCATAGGGCAAGTAAGAGACCAAGCTGAACACCTTAAGACAGCAGTACAAATGGCAGTATTCATCCACAATTTTAAAAGAAAAGGGGGGATTGGGGGATACAGTGCAGGGGAAAGAATAATAGACATAATAGCAACAGATATACATACTAAAGAATTACATTTACAAATTATGAAAATTTAAAATTTTCGGGTTTATTACAGAGACAGCATAGATCCCATTTGGAAAGGACCAGCAAAACTCCTCTGGAAAGGTGAAGGGGCAGTAGTAATACAAGACAATAGTGAGATAAAGGTAGTACCAAGAAGAAAAGCAAAGATCATTAGGGATTATGGAAAACAGATGGCAGGTGATGATTGTGTGGCAGGTAGACAGGATGAGGATTAGAACATGGAACAGCTTGGTAAAACACCATATGTATGTTTCAAGGAGAGCTAAAGGATGGTTTTATAGACATCACTATGAAAGCAGGCATCCAAAAGTAAGTTCAGAAGTACACATCCCATTAGAGGATGATTCTAAATTAGTAATAATAACCTATTGGGGTCTACATACAGGAGAAAGAGATTGGCATTTGGGTCATGGGGTCTCCATAGAATGGAGGCAGAAGAGGTATAGTACACAAATAGACCCTGATCTGGCAGACCATCTAATCCATCTGTATTATTTTGACTGTTTTTCAGAATCTGCCATAAGGAAAGCCATATTAGGAGAAATAGTTAGTCCTAGGTGCGAATATCAAGCAGGACATAACAAGGTAGGATCTCTGCAATATTTGGCATTGAAAGCATTAGTAGTCCCAAACAAGGCAAGGCCACCCTTGCCTAGTGTTAGGAAATTAGTAGAGGATAGATGGAACAAGCCCCGGAAGACCAGGGGCCACCGAGGGAGCCACACAATGAATGGGTGCTAGAACTATTAGAGGAGCTCAAGCAGGAAGCTGTTAGGCATTTCCCTCGGCAGTGGCTACATGGCCTAGGACAACTTATATATAGTACCTATGGGGATACTTGGGAAGGAGTTGAAGCTATAATAAGAACTTTGCAACAACTGCTGTTTGTCCATTTCAGAATTGGGTGCCGACATAGCAGAATAGGCATTTCGAAGAAGAAGAGTAAGGATGGAGCCAGTAGATCCTAAACTAGAGCCCTGGAACCATCCGGGAAGCCAGCCTAAAACTGCTTGTAACAAGTGCTATTGTAAAAAGTGTTGCTATCATTGCCAGCTGTGCTTTTTAAACAAAGGCTTAGGCATCTCCTATGGCAGGAAGAAGCGGAGACCCCGACGAGGACCTTCTCAGAGCAGTAAAGATCATCAAAATCCTATACCAAAGCAGTAAGTAGTGGTAATTAATAATGTAATGTTGTCCTTAGAAATAGCTGCAATAGTAGGACTGGTAGTAGCATTAATCGCAGCAATAGTTGTATGGACTATAGTATTTATAGAATATAGGAAGATTAGGGAGCAAAGGAAAATAGACTGGTTAATCCAAAGAATAAGTGAAAGAGCAGAAGACAGTGGCAATGAGAGTGATGGGGACACAGACGAGTTATCAGCACTTGTGGAGATGGGGAATCTTAATTTTGGGGATGCTAATAATTTGTAAAGCTACAGATTGGTGGGTCACAGTATACTATGGAGTACCTGTGTGGAAAGATGCAGAAACCACCTTATTTTGCGCATCAGATGATAAAGCATATGAGACAGAAGCGCATAATGTCTGGGCCACACATGCCTGTGTACCCACAGACCCCAACCCACAAGAAGTAAACCTAAAAAATGTGACAGAAGATTTTAACATGTGGAAAAATAATATGGTAGAGCAGATGCATGAAGATATAATCAGTCTATGGGATCAAAGCCTAAAGCCATGTGTAAAATTAACCCCTCTCTGTGTCACGTTAAACTGTAGCAATGCCAACACCAATAGCACCAATAGCACTAGCGCCCCTAGCATGGGCCCTGGAGAAATAAAAAACTGTTCTTTTAATGTTACCACAGAAGTAAGAGATAAAGAAAAGAAAGTCTATGCACTGTTTTATAAACTTGATGTAGTACAAATTAATGAAAGTGACAGTAATAGTACAAAGGATAGTACTCAGTATAGACTAATAAATTGTAATACCTCAGCCATCACACAGGCTTGTCCAAAGGTATCCTTTGAGCCAATTCCTATACATTATTGTGCCCCAGCTGGTTTTGCGATTCTAAAGTGTGAGGATCCGAGATTCAATGGAACAGGACCATGCAATAATGTTAGCTCAGTACAATGTACACATGGAATTATGCCAGTAGCATCAACTCAACTGCTGTTGAATGGCAGTCTAGCAGAAAAAGAGGTGATGATTAGATCTGAAAATATTACAAACAATGCCAAAAACATAATAGTACAGTTTAATGAATCGGTACCAATTACTTGTATCAGACCCAACAACAATACGAGAAAAGGTATACCTATTGGACCAGGACAAGTCTTCTATACAAGTGACATAATAGGGGATATAAGACAAGCATATTGTAGTATCAACAAAACAAAATGGGATGCCTCTTTACAAAAGGTAGCTGAACAATTAAGAAAACACTTCCCTAATAAAACAATAAATTTTACCAAACCCTCAGGAGGGGATCTAGAAATTACAACACATAGTTTTAATTGTGGAGGAGAATTTTTCTATTGTAATACAACAAGCCTGTTTAATAGCACATGGAAGAATGGCGCCACCATACAGGAGAATAGCACGGAGACAAATGGAATTATGACTCTCCCATGCAGAATAAAACAAATTGTAGACATGTGGCAGGAAGTAGGACAAGCAATGTATGCCCCTCCCATTGCAGGAGTAATATATTGTACATCAAACATTACAGGAATAATATTGACAAGAGATGGTGGGAGCAGTAACACCAATAGTGAGATCTTTAGGCCTGGAGGAGGAGATATGAGGGACAATTGGAGAAGTGAATTATATAAGTATAAAGTAGTAAAAATTGAACCACTAGGAGTAGCACCCTCCAGGGCAAAGAGAAGAGTGGTGGAGAGAGAAAAAAGAGCAGTGGGAATAGGAGCTGTTTTCCTTGGGTTCTTGGGAGCTGCAGGAAGCACTATGGGCGCGGCGTCAATAACGCTGACGGTACAGGCCAGACAGTTATTATCTGGCATAGTGCAACAGCAAAGCAATTTGCTGAAGGCTATAGAGGCTCAACAGCATCTGTTGAAACTCACAGTCTGGGGCATTAAACAGCTCCAGGCAAGAGTCCTGGCTCTGGAGAGATACCTACAAGATCAACAGCTCCTGGGAATTTGGGGTTGCTCTGGAAAACTCATCTGCACCACTACTGTGCCCTGGAACTCTAGTTGGAGTAATAAGACTTACGAGGAGATTTGGAACAACATGACCTGGTTGCAATGGGATAGAGAAATTGACAATTACACAAATATAATATACAATCTACTTGAAGAATCGCAGAACCAGCAGGAAAAGAATGAACAAGACTTACTGGCATTAGATAAATGGGCAAGTTTGTGGAATTGGTTTAGCATAACAAACTGGCTGTGGTATATAAGAATATTCATAATGATAGTAGGAGGCTTGATAGGATTAAGAATAGTTATGGCTATAATTTCTGTAGTGAATAGAGTTAGGCAGGGATACTCACCTTTGTCATTTCAGATCCCTACCCCAAACCCAGAGGGTCTCGACAGGCACGGAAGAATCGAAGAAGGAGGTGGAGAGCAAGACAGAACCAGATCGATTCGATTAGTGAGCGGATTCTTGGGACTTGCCTGGGACGACCTACGGAGCCTGTGCCTCTTCAGCTACCACCGATTGAGAGATTGCATCTTGATTGTAGCGAGGACTGTGGAACTTCTGGGACACAGCAGTCTCAAGGGACTGAGACTGGGGTGGGAGGGCCTCAAATATTTGGGGAACCTTCTACTGTATTGGGGTCGGGAATTGAAAAATAGTGCTATTAGTTTACTAAATTCCACAGCAATAGCAGTAGCTGAGTGGACAGATAGGGTTATAGAAATAGGACAAAGAGCTTGCAGAGCTATTCTCAACATACCTAGAAGAATCAGACAGGGCTTCGAAAGAGCTTTACTATAAAATGGGGAACAAGTGGTCAAAAAGTACCATAGTGGGATGGCCTGCTATTAGGGAGAGAATAAGAAGAACTCCTCCAGCAGCAGAAAGAGTAGGGGCAACAAGACAAACTCCCCCAGCAGCAGAAGGAGTAGGAGCAGTGTCTCGAGATTTAACTACACATGGAGCAGTCACAATTGGTAATACAGCAGCCTATAATCCTGATAGCGCCTGGGTAGAAGCGCAAGAAGAGGAGGAGGAAGTAGGCTTCCCAGTCAAGCCACAGGTACCTGTAAGACCAATGACCTTCAAGGGAGCTTTTGATCTCAGCCACTTTTTAAAAGAAAAGGGGGGACTGGATGGGTTAATTTACTCCCAGAAAAGACAAGACATCCTTGATCTGTGGGTCTACAAC
>A2.CD.97.97CDKTB48_AF286238_G.ES.00.X558_AF423760
TTTTTCGAAGCGAAGTACCAGGGAAGTTCTCTCGACGCAAGACTCGGCTTGCTGAGGTGCACACGGCAAGAGGCGAGAAGCGACGGCTGGTGAGTACGCCTAAAATTTTTGACTAGCGGAGGCTAGAAGGAGAGAGATGGGTGCGAGAGCGTCAGTATTGAGCGGCGGAAAATTAGAAGCTTGGGAGAAAATTCGGTTAAGGCCAGGGGGAAAGAAAAAATATAGACTGAAACATTTAGTATGGGCAAGCAGGGAGCTGGAAAAATTCTCAATCAACCCCAGCCTTTTAGAAACAGAAACAGGATGTAGACGAATATTTGGGCAATTACAACCAGCTCTCGAGACAGGAACAGAAGAACTTAGATCATTATATAATACAATAGCAGTCCTCTACTTTGTTCATCAAAAGATAGAGGTAAAAGACACCAAGGAAGCTCTAGATAAAATAGAGGAAGAACAAAACAAATGCAAGCAGAAGACACAGCAGGCAGCAGCTGACACAGGAAGCAGCAGCAGTCAAAATTACAGAGGTAGCAGCAGTCAAAATTACCCTATAGTGCAAAATGCACAAGGGCAAATGGTACACCAGGCCGTGTCACCTAGGACTTTGAATGCATGGGTCAAAGTAGTTGAAGAGAAGGCTTTTAGCCCAGAAGTAATACCCATGTTTACAGCATTATCAGAAGGAGCCACCCCACAAGACTTAAATACTATGCTAAACACAGTGGGGGGACATCAAGCAGCTATGCAAATGTTAAAAGATACCATCAATGAGGAAGCTGCAGAATGGGACAGGTTACATCCAGTACAGGCAGGGCCTATTCCACCAGGCCAGATGAGAGAACCAAGGGGAAGTGACATAGCGGGAGCTACTAGTAACCTTCAGGAACAAATAGGATGGATGACCAGCAACCCACCTATTCCAGTGGGAGAAATCTATAAAAGATGGATAATCCTGGGATTAAATAAAATAGTAAGAATGTATAGCCCTGTCAGCATTTTGGACATAAAACAAGGGCCAAAAGAACCCTTTAGAGACTATGTAGATAGGTTCTTTAAAACTCTCAGAGCTGAGCAAGCTACACAGGAGGTAAAAAATTGGATGACAGACACCTTGCTGGTCCAAAATGCAAACCCAGATTGTAAATCCATCTTGAGGGCATTAGGACCAGGGGCTACATTAGAAGAAATGATGACAGCATGTCAGGGAGTGGGAGGACCCGGCCATAAAGCAAGGGTTTTAGCTGAAGCAATGAGCCAAGTACAAAATACAAACATAATGATACAGAGAGGCAATTTTAAGGGTCAAAAAAGAATTAAGTGTTTCAACTGTGGCAAGGAAGGACACCTAGCTAGAAATTGCAGGGCCCCTAGGAAAAAGGGCTGCTGGAAATGTGGGAAGGAAGGACATCAAATGAAAGACTGCACTGAGAGACAGGCTAATTTTTTAGGGAAAATTTGGCCTTCCAACAAAGGGAGGCCAGGGAATTTTCCTCAGAGCAGGACAGAGCCAACAGCCCCACCAATGGAGGAAGAGATAACCTCCTCGCTGAAGCAGGAGAACAGGGAGCCGTCCACCCCTGCAATTTCCCTCAAATCACTCTTTGGCAACGACCTCTTGTCACAGTGAAAATAGAAGGACAGCTAAGAGAAGCTTTATTAGATACAGGAGCAGATGATACAGTGTTAGAAGACATAAATCTGCCATGGAAATGGAAACCAAAAATGATAGGGGGAATTGGAGGTTTTATCAAAGTAAGACAATATGATCAGATAGTTATAGAAATTTGTGGAAAAAGGGCTATCGGTACAGTATTAGTAGGACCTACACCTGTCAACATAATTGGAAGAAATATGTTGGTTCAGCTTGGTTGTACTCTAAATTTTCCAATTAGTCCTATTGAAACTGTACCAGTAAAATTGAAGCCAGGAATGGATGGTCCAAAGGTCAAACAATGGCCATTGACAGAAGAAAAAATAAAAGCATTAACAGAAATTTGTAAAGAAATGGAAAAGGAAGGGAAAATTTCAAAAATTGGGCCTGAAAATCCATACAACACTCCAGTGTTTGCTATAAAGAAAAAAGACAGCGATAAATGGAGAAAATTAGTAGATTTCAGAGAACTCAATAAGAGAACTCAAGACTTCTGGGAAGTTCAGTTAGGAATACCACACCCAGCGGGATTAAAAAAGAAAAAATCAGTAACAGTATTAGATGTGGGGGACGCATATTTTTCCGTTCCCCTACATGAAGACTTCAGGAAATATACTGCATTCACCATACCTAGTATAAACAATGAGACACCAGGAATTAGGTATCAGTACAATGTACTTCCACAGGGATGGAAAGGATCACCAGCAATATTCCAGAGTAGCATGACAAAAATCCTAGATCCCTTTAGGGCAAGAAATCCAGAGATGGTCATCTACCAATACATGGATGACTTGTATGTAGGATCTGATTTAGAAATAGATCAGCATAGAGCAAAAATAGAGGAGTTAAGGGCTCATTTATTAAGATGGGGATTTACTACACCAGACAAAAAGCATCAGAAAGAACCTCCATTTCTGTGGATGGGATATGAGCTTCATCCTGACAAGTGGACAGTCCAGCCTATAAAGCTGCCAGAAAAAGACAGCTGGACTGTCAATGATATACAGAAATTAGTAGGAAAGTTAAATTGGGCAAGTCAGATTTATGCAGGGATTAAAGTAAGGCAACTGTGTAAACTCCTTAGAGGAACCAAAGCATTAACAGACATAGTACCACTGACTAGAGAAGCAGAATTAGAATTGGAAGAGAACAGGGAGATTCTAAAAGACCCTGTACATGGGGTATATTATGACCCATCAAAAGACTTAATAGCAGAAATACAGAAACAAGGGCAAGGCCAATGGTCATATCAAATTTATCAAGAACCATTTAAAAATCTAAAAACAGGGAAATATGCAAAAAGGAAGTCCACCCACACCAATGATGTAAAACAATTAACAGAAGCAGTACAAAAAATAGCCACAGAGAGCATAATAATATGGGGAAAAACTCCTAAATTTAAATTACCTATACGAAAAGAAACATGGGAAGTATGGTGGACAGAATATTGGCAGGCCACCTGGATTCCTGACTGGGAATTTGTCAATACCCCTCCTCTAGTAAAATTATGGTATCGGTTAGAAACAGAACCCATAGCAGGAGCAGAAACTTATTATGTAGATGGGGCAGCTAATAGGGAAACAAAATTAGGAAAGGCAGGATATGTTACTGACAGAGGAAGACAAAAAATTGTCCCCTTGACAGAGACAACAAATCAAAAGACTGAATTACATGCAATCTATTTGGCTTTACAGGATTCAGGGTCAGAAGTAAACATAGTAACAGATTCACAGTATGCATTAGGAATCATTCAAGCGCAACCAGATAGCAGTGAATCAGAGTTAGTCAATCAAATAATAGAAAAGTTAATAGAAAAGGAAAGGGTCTACCTGTCATGGGTACCAGCACACAAAGGGATTGGAGGAAATGAACAGGTGGATAAATTAGTCAGTTGTGGAATCAGAAAAGTGTTATTTTTAGATGGGATAGATAAGGCTCAAGAAGAACATGAAAAATATCACAGTAATTGGAGAGCAATGGCTCATGACTTTAATCTGCCACCTATAGTAGCCAAAGAAATAGTAGCCAGCTGTGATAAATGGTCAGGCTAAAAGGGGAAGCCATGCATGGACAAGTAGACTGCAGTCCAGGAATATGGCAACTAGATTGCACACATCTAGAAGGAAAAATTATCGTGGTAGCAGTCCATGTAGCCAGTGGCTATATAGAAGCAGAAGTCATCCCAGCAGAGACAGGACAGGAGACAGCATACTTTCTATTAAAATTAGCAGGAAGATGGCCAGTAAAAGTAATACATACAGACAATGGGCCCAATTTCACCAGTGCAGCAGTTAAGGCAGCCTGTTGGTGGGCAGATGTCAAACAGGAATTTGGGATTCCCTACAATCCCCAAAGTCAAGGAGTAGTGGAATCTATGAATAAAGAATTAAAGAAAATCATAGGGCAGGTAAGAGATCAAGCTGAACATCTTAAGACAGCAGTGCAAATGGCAGTGTTCATCCACAATTTTAAAAGAAAAGGGGGGATTGGGGGATACAGTGCAGGGGAAAGAATAATAGACATAATAGCAACAGATATACAAACTAAAGAATTACAAAAACAAATCATAAAAATTCAAAATTTTCGGGTTTATTACAGGGACAGCAGAGATCCAATTTGGAAAGGACCAGCAAAACTCCTTTGGAAAGGTGAAGGGGCAGTAGTAATACAAGACAATGGTGATATAAAAGTAGTACCAAGAAGAAAAGCAAAGATCATTAGGGATTATGGAAAACAGATGGCAGGTGATGATTGTGTGGCAGGTAGACAGGATGAGGATTAGAACATGGAACAGTCTAGTAAAACATCATATGTATGTGTCAAAGAAAGCTAGAGAGTGGTTCTATAGACATCACTATGAAAGCAGACATCCAAGAGTAAGTTCAGAAGTACACATCCCGCTAAAGGAGGCTAGATTAATAGTAAGAACATATTGGGGTCTGCACCCAGGAGAAAAAGACTGGCACTTGGGTCATGGGGTCTCCATAGAATGGAGGCAGGGAAGGTACAGTACACAAATAGACCCTGATCTGGCAGACCATCTAATCCATCTGTATTATTTTGACTGTTTTTCAGAATCTGCCATAAGGAGAGCCATATTAGGAGAAATAGTTAGGCCTAGATGTGAATATCAAGCAGGACATAATAAGGTAGGGTCTCTGCAATATTTGGCATTGAGAGCATTAGTAGCTTCAACAAGGACAAAGCCACCTTTGCCTAGTGTTAGGAAATTAGTAGAGGATAGATGGAACAAGCCCCAGAAGACCAGGGGCCACCGAGGGAGCCACACAATGAATGGGTGTTAGAACTGTTAGAGGAGCTAAAGCAAGAAGCAGTTAGACATTTCCCTAGGCCGTGGCTACATGGCCTGGGACAACATATCTATAATACCTATGGGGATACTAGGGAGGGAGTTGAAGCTATAGTAAGAATTTTGCAACAACTACTGTTTGTTCATTTCAGAATTGGGTGCCAACATAGCAGAATAGGCATTATTCCAAGAAGAAGAGTAAGGGATGGAGCCAGTAGACCCTAACTTAGAGCCCTGGAACCATCCGGGAAGCCAGCCTAAAACTGCTTGTAACAATTGCTATTGTAAAAAGTGTTGCTATCATTGCCAAAGGTGCTTTCTAAACAAAGGCTTAGGCATCTCCTATGGCAGGAAGAAGCGGAGACCCCGACGAGGACCTGATCAGGGCAATACGGATCATCAAAATCCTGTACCAAAGCAGTAAGTAGTAGTAATCAATATAGGTAATGTCACCTTTAGCAATACTGTCAATAGTAGGACTGGTAGTAGCATCAATTTTAGCAATAGTTGTGTGGACTGTAGTATTTATAGAATATAGAAAGATTAAGAAGCAAAGGAAAATAGACTGGTTACTTGAGAGAATAAGTGAAAGAGCAGAAGACAGTGGCAACGAGAGTGATGGGGACACAGAGGAATTGTCAAAAATGGTGGGAATGGGGAATCTTGGTTTTTGGGATGATAATGATGTGTAAGGCTGCAGATTTGTGGGTCACAGTATACTATGGAGTACCTGTGTGGAGAGATGCAGATACCACCCTATTTTGTGCATCAGACGCTAAAGCATATGCTACAGAAAAGCATAATGTCTGGGCCACACATGCCTGTGTACCCACAGACCCCAACCCACAAGAAGTAAACCTGGCAAATGTAACAGAAGATTTTAACATGTGGAAAAATAACATGGTAGAGCAGATGCATGCAGATATAATCAGTCTATGGGATCAAAGCCTAAAGCCATGTGTAAAATTAACCCCTCTCTGCGTCACTTTAAATTGTAGCAATGCCAACACCACTAACACCAATAGCACTGAAGAAATAAAAAACTGCTCTTACAATATGCCCACAGAACTAAAAGATAAAACACAGAAAGTCTATTCACTGTTTTATGAACTTGATGTAGTACTACTTAATAGAAGTAAGAATAGTAGTTATAGTACTTATAGACTAATAAGTTGTAATACCTCAGTCATCACACAAGCTTGTCCAAAGGTATCCTTTGAGCCAATTCCTATACATTATTGTGCCCCAGCTGGTTATGCGATTCTAAAGTGTAAGGATAAGGAATTCAATGGAAAAGGGTCATGCAGTAATGTTAGCTCAGTACAATGTGCACATGGAATTAGGCCAGTAGCATCAACTCAACTGCTGCTGAATGGCAGTCTAGCAGAAGGAAAGGTAATGATTAGATCTGAAAATATTACAGACAATGCCAAAAACATAATAGTACAGTTTAATAAACCTGTACCAATTAATTGTACCAGACCCAACAACAATACAAGAAAAAGTATACGCTTTGGACCAGGACAGGCCTTCTATACAAATAATAACATAATAGGGGATATAAGACAAGCACATTGTAATATCAGCATAACAGAATGGAATGCCACTCTAAAAAAGGTAGTTGAACAATTAAGAGAACACTTCCCTAATAAAACAATAATCTTTAATAGCTCCTCAGGAGGGGACCTAGAAATTACAACACATAGTTTTAATTGTGGAGGAGAATTTTTCTATTGCAATACAACAGGCCTGTTTAATAGCACATGGGAAAATGGCACTAACAAACAGAATTACACGGAGTCAAATGACACTATAACGCTCCAATGCAGAATAAAACAAATTATAAACATGTGGCAGAGAGTAGGCCGAGCAATGTATGCCCCTCCCATTGCAGGAGTAATAAAGTGTACATCAAACATTACAGGAATGATATTGACAAGAGACGGTGGGAAGAACAGTATTAATGAGACCTTCAGACCTGGAGGAGGAGATATGAGGGACAATTGGAGAAGTGAATTATATAAGTATAAAGTAGTAAAAATTGAACCACTAGGAATAGCACCCACAGAGGCAAGGAGAAGAGTGGTGCAGAGAGAAAAAAGAGCAGTTGGATTGGGAGCTGTTTTCCTTGGGTTCTTGGGAGCAGCAGGAAGCACTATGGGCGCGGCGTCAATAACGCTGACGGTACAGGCCAGACAATTATTGACTGGCATAGTGCAACAGCAAAGCAATTTGCTGAAGGCTATAGAGGCTCAACAACAGATGTTGAGGCTCACAGTCTGGGGCATTAAACAGCTCCAGGCAAGAGTCCTGGCTCTGGAAAGATACCTACAGGATCAACAGCTCCTAGGAATTTGGGGCTGCTCTGGAAAACTCATCTGCGCCACTGATGTGAGATGGAACTCTAGTTGGAGTAATAAGACTCAGGAGCAGATTTGGAAAAACATGACCTGGTTGCAATGGGATAAGGAAATTAGCACTTACACAGACATAATATATATGCTACTTGAGGAATCGCAGAACCAGCAGGAAAAGAATGAACAAGACTTATTGGCATTAGACAAATGGGCAAATTTGTGGAATTGGTTTGACATAACAAGATGGCTGTGGTATATAAAAATATTTATAATGATAGTAGGAGGCTTGATAGGATTAAGAATAGTTATTGCTATAATTTCTGTAGTAAAAAGAGTTAGGCAGGGATACTCACCATTGTCATTTCAGATCCCTACCCCAAACCCAGAGGGACTCGACAGGCCCGGAAGAATCGAAGAAGAAGGTGGAGAGCAAGGCAGAGACAGATCGATTCGATTAGTGAGCGGATTCTTAGCACTTGCCTGGGACGACCTACGGAGCCTGTGCCTCTTCAGCTACCACCGCTTGAGAGATTGCATCTTGATTGCAGCGAGGATTGTGGAACTTGTGGGACACAGCAGTCTCAAGGGGCTGAGACTGGGGTGGGAAGGCCTCAAACATCTGTGGAATCTTCTGGTATATTGGGGTCAGGAATTGAAGACTAGTGCTATTAGATTGCTTGATACCATAGCAGTAGCAGTAGCTGAGTGGACAGATAGGGTTATAGAAATAGGACAAAGAGCTTGCAGAGCTATCCGCAACATACCTAGAAGAATCAGACAGGGCCTCGAAAGGGCGTTACTATAAAATGGGGGGCAAGTGGTCAAAAAGAACCATAGTGGGATGGCCTGAGATTAGGGAAAGAATGAGACGAACTCCTCCAGCAGCAGAAGGAGTAAGACCAACTCCTCCAGCTGCAGAAGGAGTAGGAGCAGTGTCTCAAGATTTAGCCAGACATGGAGCAGTCACAAGCAGTAATACAGCAGCTAACAATCCTGATTGCGCCTGGCTGGAAGCGCAAGAAGAGGAGGAAGTAGGCTTTCCAGTCAGGCCACAGGTACCTTTAAGGGCGATGACCTACAAGGGAGCTGTAGATCTCAGCCACTTTTTAAAAGAAAAGGGGGGACTGGATGGGCTAATTTACTCCCAGAGAAGACAAGACATCCTTGATCTGTGGGTCTACAACACACAGGGCTACTTCCCTGATTGGCAGAATTACACACCAGGGCCAGGGGCCAGGTTCCCACTAACATTTGGATGGTGCTTCAAGCTAGTACCAGTTGATCCATCTGAGGTAGAAGAGGCTACGGAGGGGGAGAACAACAGTTTATTACACCCCATATGCCAACATGGAGCAGAGGACCCTGAAAGAGAAGTGTTAAAGTGGAAGTTTGATAGTCGCCTGGCGCTGAGACACCTAGCCAGAGAGCAGCATCCGGAGTTCTACAAAGACTGCTGACACAGAAGATGCTGACACAGAAGTTGCTGACAGGGACTTTCCACGGGGACTTTCCGGGGAGGTGTGGTGAGGGCGGAGTTGGGAGTGGCTAACCCTCAGATGCTGCATATAAGCAGCTGCTTTGCGCCTGTACTGGGTCTCTCCTTGTTGGACCAGATAGAGCCTGGGAGCTCTCAGGCTAGCAGGGGAACCCA
>A2.CD.97.97CDKS10_AF286241_H.CF.90.056_AF005496
AGCTATAAGAGAGACTTAATTAGGAAAAGCAGGATTTGTCACTGACAGAGGAAGACAAAAAATTGTCTCCCTGACGGAGACAACAAATCAAAAGACTGAATTACATGCAATCTATTTAGCTTTACAGGATTCAGAATTAGAAGTAAACATAGTAACAGATTCACAGTATGCATTAGGAATCATTCAGGCACAACCAGATAGGAGTGAATCAGAGTTAGTCAATCAAATAATAGAAAAGTTAATAGAAAAAGAGAGGGTCTACCTGTCATGGGTACCAGCACACAAGGGGATTGGAGGAAATGAACAGGTAGACAAATTAGTCAGTTCTGGAATCAGGAAAGTGTTATTTTTAGATGGAATAGATAAAGCTCAAGAAGAACATGAAAGATATCACAGCAATTGGAGAGCCATGGCTCATGACTTTAATCTGCCACCTATAGTAGCAAAAGAAATAGTAGCTAGTTGTGACAAATGTCAGCTAAAAGGGGAAGCCATGCATGGACAAGTAGACTGTAGCCCAGGAATATGGCAACTAGATTGCACACATCTAGAAGGAAAAGTTATCCTGGTAGCAGTCCATGTAGCCAGTGGCTATATAGAAGCAGAAGTCATTCCAGCAGAAACAGGACAGGAAACAGCATACTTTATATTAAAACTAGCAGGAAGATGGCCAGTAAAAGTAATACATACTGACAATGGGTCCAATTTCACCAGTGCAACAGTTAAGGCAGCCTGTTGGTGGGCAGGAGTCCAACAGGAATTTGGAATTCCCTACAATCCCCAAAGTCAAGGAGTAGTGGAATCTATGAACAAAGAATTAAAGAAAATCATAGGGCAAGTAAGAGACCAAGCTGAACACCTTAAGACAGCAGTACAAATGGCAGTATTCATCCACAATTTTAAAAGAAAAGGGGGGATTGGGGGATACAGTGCAGGGGAAAGAATAATAGACATAATAGCAACAGACATACAAACTAAAGAATTACAAAAACAAATTTCAAACATTCAAAAATTTCGGGTTTATTACAGGGACAGCAGAGACCCAATTTGGAAAGGACCAGCAAAACTCCTCTGGAAAGGTGAAGGGGCAGTAGTAATACAAGACAATAGTGAAATAAAAGTAGTACCAAGAAGAGAGGCAAAAATCATTAGGGATTATGGAAAACAGATGGCAGGTGATGATTGTGTGGCAGGTAGACAGGATGAGGATTAGAACATGGAACAGTTTAGTAAAACATCATATGTATATTTCAAAGAAAGCTAAAAAGTGGTTCTATAGACATCACTATGAAAGTAGACATCCGAGAGTAAGTTCAGAAGTACACATCCCGTTAGGGGAGGCTACATTAATAGTAAGAACATATTGGGGTCTGCACCCAGGAGAGAAAGAATGGCAATTGGGTCATGGGGTCTCCATAGAATGGAGGCAGAAGAGGTATAGTACACAAATAGACCCTGATCTGGCAGACCATCTAATCCATCTGTATTATTTTGACTGTTTTTCAGAATCTGCCATAAGGAAAGCCATATTAGGAGAAATAGTTAGTCCTAGGTGCGAATATCAAGCAGGACATAACAAGGTAGGATCTCTGCAATATTTGGCATTGAAAGCATTAGTAGTCCCAAACAAGGCAAGGCCACCCTTGCCTAGTGTTAGGAAATTAGTAGAGGATAGATGGAACAAGCCCCGGAAGACCAGGGGCCACCGAGGGAGCCACACAATGAATGGGTGCTAGAACTATTAGAGGAGCTCAAGCAGGAAGCTGTTAGGCATTTCCCTCGGCAGTGGCTACATGGCCTAGGACAACTTATATATAGTACCTATGGGGATACTTGGGAAGGAGTTGAAGCTATAATAAGAACTTTGCAACAACTGCTGTTTGTCCATTTCAGAATTGGGTGCCGACATAGCAGAATAGGCATTTCGAAGAAGAAGAGTAAGGATGGAGCCAGTAGATCCTAAACTAGAGCCCTGGAACCATCCGGGAAGCCAGCCTAAAACTGCTTGTAACAAGTGCTATTGTAAAAAGTGTTGCTATCATTGCCAGCTGTGCTTTTTAAACAAAGGCTTAGGCATCTCCTATGGCAGGAAGAAGCGGAGACCCCGACGAGGACCTTCTCAGAGCAGTAAAGATCATCAAAATCCTATACCAAAGCAGTAAGTAGTGGTAATTAATAATGTAATGTTGTCCTTAGAAATAGCTGCAATAGTAGGACTGGTAGTAGCATTAATCGCAGCAATAGTTGTATGGACTATAGTATTTATAGAATATAGGAAGATTAGGGAGCAAAGGAAAATAGACTGGTTAATCCAAAGAATAAGTGAAAGAGCAGAAGACAGTGGCAATGAGAGTGATGGGGACACAGACGAGTTATCAGCACTTGTGGAGATGGGGAATCTTAATTTTGGGGATGCTAATAATTTGTAAAGCTACAGATTGGTGGGTCACAGTATACTATGGAGTACCTGTGTGGAAAGATGCAGAAACCACCTTATTTTGCGCATCAGATGATAAAGCATATGAGACAGAAGCGCATAATGTCTGGGCCACACATGCCTGTGTACCCACAGACCCCAACCCACAAGAAGTAAACCTAAAAAATGTGACAGAAGATTTTAACATGTGGAAAAATAATATGGTAGAGCAGATGCATGAAGATATAATCAGTCTATGGGATCAAAGCCTAAAGCCATGTGTAAAATTAACCCCTCTCTGTGTCACGTTAAACTGTAGCAATGCCAACACCAATAGCACCAATAGCACTAGCGCCCCTAGCATGGGCCCTGGAGAAATAAAAAACTGTTCTTTTAATGTTACCACAGAAGTAAGAGATAAAGAAAAGAAAGTCTATGCACTGTTTTATAAACTTGATGTAGTACAAATTAATGAAAGTGACAGTAATAGTACAAAGGATAGTACTCAGTATAGACTAATAAATTGTAATACCTCAGCCATCACACAGGCTTGTCCAAAGGTATCCTTTGAGCCAATTCCTATACATTATTGTGCCCCAGCTGGTTTTGCGATTCTAAAGTGTGAGGATCCGAGATTCAATGGAACAGGACCATGCAATAATGTTAGCTCAGTACAATGTACACATGGAATTATGCCAGTAGCATCAACTCAACTGCTGTTGAATGGCAGTCTAGCAGAAAAAGAGGTGATGATTAGATCTGAAAATATTACAAACAATGCCAAAAACATAATAGTACAGTTTAATGAATCGGTACCAATTACTTGTATCAGACCCAACAACAATACGAGAAAAGGTATACCTATTGGACCAGGACAAGTCTTCTATACAAGTGACATAATAGGGGATATAAGACAAGCATATTGTAGTATCAACAAAACAAAATGGGATGCCTCTTTACAAAAGGTAGCTGAACAATTAAGAAAACACTTCCCTAATAAAACAATAAATTTTACCAAACCCTCAGGAGGGGATCTAGAAATTACAACACATAGTTTTAATTGTGGAGGAGAATTTTTCTATTGTAATACAACAAGCCTGTTTAATAGCACATGGAAGAATGGCGCCACCATACAGGAGAATAGCACGGAGACAAATGGAATTATGACTCTCCCATGCAGAATAAAACAAATTGTAGACATGTGGCAGGAAGTAGGACAAGCAATGTATGCCCCTCCCATTGCAGGAGTAATATATTGTACATCAAACATTACAGGAATAATATTGACAAGAGATGGTGGGAGCAGTAACACCAATAGTGAGATCTTTAGGCCTGGAGGAGGAGATATGAGGGACAATTGGAGAAGTGAATTATATAAGTATAAAGTAGTAAAAATTGAACCACTAGGAGTAGCACCCTCCAGGGCAAAGAGAAGAGTGGTGGAGAGAGAAAAAAGAGCAGTGGGAATAGGAGCTGTTTTCCTTGGGTTCTTGGGAGCTGCAGGAAGCACTATGGGCGCGGCGTCAATAACGCTGACGGTACAGGCCAGACAGTTATTATCTGGCATAGTGCAACAGCAAAGCAATTTGCTGAAGGCTATAGAGGCTCAACAGCATCTGTTGAAACTCACAGTCTGGGGCATTAAACAGCTCCAGGCAAGAGTCCTGGCTCTGGAGAGATACCTACAAGATCAACAGCTCCTGGGAATTTGGGGTTGCTCTGGAAAACTCATCTGCACCACTACTGTGCCCTGGAACTCTAGTTGGAGTAATAAGACTTACGAGGAGATTTGGAACAACATGACCTGGTTGCAATGGGATAGAGAAATTGACAATTACACAAATATAATATACAATCTACTTGAAGAATCGCAGAACCAGCAGGAAAAGAATGAACAAGACTTACTGGCATTAGATAAATGGGCAAGTTTGTGGAATTGGTTTAGCATAACAAACTGGCTGTGGTATATAAGAATATTCATAATGATAGTAGGAGGCTTGATAGGATTAAGAATAGTTATGGCTATAATTTCTGTAGTGAATAGAGTTAGGCAGGGATACTCACCTTTGTCATTTCAGATCCCTACCCCAAACCCAGAGGGTCTCGACAGGCACGGAAGAATCGAAGAAGGAGGTGGAGAGCAAGACAGAACCAGATCGATTCGATTAGTGAGCGGATTCTTGGGACTTGCCTGGGACGACCTACGGAGCCTGTGCCTCTTCAGCTACCACCGATTGAGAGATTGCATCTTGATTGTAGCGAGGACTGTGGAACTTCTGGGACACAGCAGTCTCAAGGGACTGAGACTGGGGTGGGAGGGCCTCAAATATTTGGGGAACCTTCTACTGTATTGGGGTCGGGAATTGAAAAATAGTGCTATTAGTTTACTAAATTCCACAGCAATAGCAGTAGCTGAGTGGACAGATAGGGTTATAGAAATAGGACAAAGAGCTTGCAGAGCTATTCTCAACATACCTAGAAGAATCAGACAGGGCTTCGAAAGAGCTTTACTATAAAATGGGGAACAAGTGGTCAAAAAGTACCATAGTGGGATGGCCTGCTATTAGGGAGAGAATAAGAAGAACTCCTCCAGCAGCAGAAAGAGTAGGGGCAACAAGACAAACTCCCCCAGCAGCAGAAGGAGTAGGAGCAGTGTCTCGAGATTTAACTACACATGGAGCAGTCACAATTGGTAATACAGCAGCCTATAATCCTGATAGCGCCTGGGTAGAAGCGCAAGAAGAGGAGGAGGAAGTAGGCTTCCCAGTCAAGCCACAGGTACCTGTAAGACCAATGACCTTCAAGGGAGCTTTTGATCTCAGCCACTTTTTAAAAGAAAAGGGGGGACTGGATGGGTTAATTTACTCCCAGAAAAGACAAGACATCCTTGATCTGTGGGTCTACAAC
>A2.CD.97.97CDKS10_AF286241_J.SE.93.SE7887_AF082394
AGCTATAAGAGAGACTTAATTAGGAAAAGCAGGATTTGTCACTGACAGAGGAAGACAAAAAATTGTCTCCCTGACGGAGACAACAAATCAAAAGACTGAATTACATGCAATCTATTTAGCTTTACAGGATTCAGAATTAGAAGTAAACATAGTAACAGATTCACAGTATGCATTAGGAATCATTCAGGCACAACCAGATAGGAGTGAATCAGAGTTAGTCAATCAAATAATAGAAAAGTTAATAGAAAAAGAGAGGGTCTACCTGTCATGGGTACCAGCACACAAGGGGATTGGAGGAAATGAACAGGTAGACAAATTAGTCAGTTCTGGAATCAGGAAAGTGTTATTTTTAGATGGAATAGATAAAGCTCAAGAAGAACATGAAAGATATCACAGCAATTGGAGAGCCATGGCTCATGACTTTAATCTGCCACCTATAGTAGCAAAAGAAATAGTAGCTAGTTGTGACAAATGTCAGCTAAAAGGGGAAGCCATGCATGGACAAGTAGACTGTAGCCCAGGAATATGGCAACTAGATTGCACACATCTAGAAGGAAAAGTTATCCTGGTAGCAGTCCATGTAGCCAGTGGCTATATAGAAGCAGAAGTCATTCCAGCAGAAACAGGACAGGAAACAGCATACTTTATATTAAAACTAGCAGGAAGATGGCCAGTAAAAGTAATACATACTGACAATGGGTCCAATTTCACCAGTGCAACAGTTAAGGCAGCCTGTTGGTGGGCAGGAGTCCAACAGGAATTTGGAATTCCCTACAATCCCCAAAGTCAAGGAGTAGTGGAATCTATGAACAAAGAATTAAAGAAAATCATAGGGCAAGTAAGAGACCAAGCTGAACACCTTAAGACAGCAGTACAAATGGCAGTATTCATCCACAATTTTAAAAGAAAAGGGGGGATTGGGGGATACAGTGCAGGGGAAAGAATAATAGACATAATAGCAACAGATATACATACTAAAGAATTACATTTACAAATTATGAAAATTTAAAATTTTCGGGTTTATTACAGAGACAGCATAGATCCCATTTGGAAAGGACCAGCAAAACTCCTCTGGAAAGGTGAAGGGGCAGTAGTAATACAAGACAATAGTGAGATAAAGGTAGTACCAAGAAGAAAAGCAAAGATCATTAGGGATTATGGAAAACAGATGGCAGGTGATGATTGTGTGGCAGGTAGACAGGATGAGGATTAGAACATGGAACAGTTTAGTAAAACATCATATGTATATTTCAAAGAAAGCTAAAAAGTGGTTCTATAGACATCACTATGAAAGTAGACATCCGAGAGTAAGTTCAGAAGTACACATCCCGTTAGGGGAGGCTACATTAATAGTAAGAACATATTGGGGTCTGCACCCAGGAGAGAAAGAATGGCAATTGGGTCATGGGGTCTCCATAGAATGGAGGCAGAAGAGGTATAGTACACAAATAGACCCTGATCTGGCAGACCATCTAATCCATCTGTATTATTTTGACTGTTTTTCAGAATCTGCCATAAGGAAAGCCATATTAGGAGAAATAGTTAGTCCTAGGTGCGAATATCAAGCAGGACATAACAAGGTAGGATCTCTGCAATATTTGGCATTGAAAGCATTAGTAGTCCCAAACAAGGCAAGGCCACCCTTGCCTAGTGTTAGGAAATTAGTAGAGGATAGATGGAACAAGCCCCGGAAGACCAGGGGCCACCGAGGGAGCCACACAATGAATGGGTGCTAGAACTATTAGAGGAGCTCAAGCAGGAAGCTGTTAGGCATTTCCCTCGGCAGTGGCTACATGGCCTAGGACAACTTATATATAGTACCTATGGGGATACTTGGGAAGGAGTTGAAGCTATAATAAGAACTTTGCAACAACTGCTGTTTGTCCATTTCAGAATTGGGTGCCGACATAGCAGAATAGGCATTTCGAAGAAGAAGAGTAAGGATGGAGCCAGTAGATCCTAAACTAGAGCCCTGGAACCATCCGGGAAGCCAGCCTAAAACTGCTTGTAACAAGTGCTATTGTAAAAAGTGTTGCTATCATTGCCAGCTGTGCTTTTTAAACAAAGGCTTAGGCATCTCCTATGGCAGGAAGAAGCGGAGACCCCGACGAGGACCTTCTCAGAGCAGTAAAGATCATCAAAATCCTATACCAAAGCAGTAAGTAGTGGTAATTAATAATGTAATGTTGTCCTTAGAAATAGCTGCAATAGTAGGACTGGTAGTAGCATTAATCGCAGCAATAGTTGTATGGACTATAGTATTTATAGAATATAGGAAGATTAGGGAGCAAAGGAAAATAGACTGGTTAATCCAAAGAATAAGTGAAAGAGCAGAAGACAGTGGCAATGAGAGTGATGGGGACACAGACGAGTTATCAGCACTTGTGGAGATGGGGAATCTTAATTTTGGGGATGCTAATAATTTGTAAAGCTACAGATTGGTGGGTCACAGTATACTATGGAGTACCTGTGTGGAAAGATGCAGAAACCACCTTATTTTGCGCATCAGATGATAAAGCATATGAGACAGAAGCGCATAATGTCTGGGCCACACATGCCTGTGTACCCACAGACCCCAACCCACAAGAAGTAAACCTAAAAAATGTGACAGAAGATTTTAACATGTGGAAAAATAATATGGTAGAGCAGATGCATGAAGATATAATCAGTCTATGGGATCAAAGCCTAAAGCCATGTGTAAAATTAACCCCTCTCTGTGTCACGTTAAACTGTAGCAATGCCAACACCAATAGCACCAATAGCACTAGCGCCCCTAGCATGGGCCCTGGAGAAATAAAAAACTGTTCTTTTAATGTTACCACAGAAGTAAGAGATAAAGAAAAGAAAGTCTATGCACTGTTTTATAAACTTGATGTAGTACAAATTAATGAAAGTGACAGTAATAGTACAAAGGATAGTACTCAGTATAGACTAATAAATTGTAATACCTCAGCCATCACACAGGCTTGTCCAAAGGTATCCTTTGAGCCAATTCCTATACATTATTGTGCCCCAGCTGGTTTTGCGATTCTAAAGTGTGAGGATCCGAGATTCAATGGAACAGGACCATGCAATAATGTTAGCTCAGTACAATGTACACATGGAATTATGCCAGTAGCATCAACTCAACTGCTGTTGAATGGCAGTCTAGCAGAAAAAGAGGTGATGATTAGATCTGAAAATATTACAAACAATGCCAAAAACATAATAGTACAGTTTAATGAATCGGTACCAATTACTTGTATCAGACCCAACAACAATACGAGAAAAGGTATACCTATTGGACCAGGACAAGTCTTCTATACAAGTGACATAATAGGGGATATAAGACAAGCATATTGTAGTATCAACAAAACAAAATGGGATGCCTCTTTACAAAAGGTAGCTGAACAATTAAGAAAACACTTCCCTAATAAAACAATAAATTTTACCAAACCCTCAGGAGGGGATCTAGAAATTACAACACATAGTTTTAATTGTGGAGGAGAATTTTTATATTGTAATACATCAAAACTGTTCAATAGTAGTTGGGATAAGAATAGCATTGAAGCTACAAATGACACAAGTNACGCAACTATCACAATACCATGTAAAATAAAACAAATTGTGAGAATGTGGCAAAGGACAGGACAAGCAATCTATGCCCCTCCCATTGCAGGAAACATTACGTGCACATCAAATATTACAGGATTACTATTGACACGTGATGGAGGAAACAGGGGGAATGGCAGTGAGAACAATAGTGAGATCTTTAGGCCTGGAGGAGGAGATATGAGGGACAATTGGAGAAGTGAATTATATAAGTATAAAGTAGTAAAAATTGAACCACTAGGAGTAGCACCCTCCAGGGCAAAGAGAAGAGTGGTGGAGAGAGAAAAAAGAGCAGTGGGAATAGGAGCTGTTTTCCTTGGGTTCTTGGGAGCTGCAGGAAGCACTATGGGCGCGGCGTCAATAACGCTGACGGTACAGGCCAGACAGTTATTATCTGGCATAGTGCAACAGCAAAGCAATTTGCTGAAGGCTATAGAGGCTCAACAGCATCTGTTGAAACTCACAGTCTGGGGCATTAAACAGCTCCAGGCAAGAGTCCTGGCTCTGGAGAGATACCTACAAGATCAACAGCTCCTGGGAATTTGGGGTTGCTCTGGAAAACTCATCTGCACCACTACTGTGCCCTGGAACTCTAGTTGGAGTAATAAGACTTACGAGGAGATTTGGAACAACATGACCTGGTTGCAATGGGATAGAGAAATTGACAATTACACAAATATAATATACAATCTACTTGAAGAATCGCAGAACCAGCAGGAAAAGAATGAACAAGACTTACTGGCATTAGATAAATGGGCAAGTTTGTGGAATTGGTTTAGCATAACAAACTGGCTGTGGTATATAAGAATATTCATAATGATAGTAGGAGGCTTGATAGGATTAAGAATAGTTATGGCTATAATTTCTGTAGTGAATAGAGTTAGGCAGGGATACTCACCTTTGTCATTTCAGATCCCTACCCCAAACCCAGAGGGTCTCGACAGGCACGGAAGAATCGAAGAAGGAGGTGGAGAGCAAGACAGAACCAGATCGATTCGATTAGTGAGCGGATTCTTGGGACTTGCCTGGGACGACCTACGGAGCCTGTGCCTCTTCAGCTACCACCGATTGAGAGATTGCATCTTGATTGTAGCGAGGACTGTGGAACTTCTGGGACACAGCAGTCTCAAGGGACTGAGACTGGGGTGGGAGGGCCTCAAATATTTGGGGAACCTTCTACTGTATTGGGGTCGGGAATTGAAAAATAGTGCTATTAGTTTACTAAATTCCACAGCAATAGCAGTAGCTGAGTGGACAGATAGGGTTATAGAAATAGGACAAAGAGCTTGCAGAGCTATTCTCAACATACCTAGAAGAATCAGACAGGGCTTCGAAAGAGCTTTACTATAAAATGGGGAACAAGTGGTCAAAAAGTACCATAGTGGGATGGCCTGCTATTAGGGAGAGAATAAGAAGAACTCCTCCAGCAGCAGAAAGAGTAGGGGCAACAAGACAAACTCCCCCAGCAGCAGAAGGAGTAGGAGCAGTGTCTCGAGATTTAACTACACATGGAGCAGTCACAATTGGTAATACAGCAGCCTATAATCCTGATAGCGCCTGGGTAGAAGCGCAAGAAGAGGAGGAGGAAGTAGGCTTCCCAGTCAAGCCACAGGTACCTGTAAGACCAATGACCTTCAAGGGAGCTTTTGATCTCAGCCACTTTTTAAAAGAAAAGGGGGGACTGGATGGGTTAATTTACTCCCAGAAAAGACAAGACATCCTTGATCTGTGGGTCTACAAC
>A2.CY.94.94CY017_41_AF286237_K.CM.96.MP535_AJ249239
TTGAAAAGCGAAAGTAACAGGGACTCGAAAGCGAAAGTTCCAGAGGAGTTCTCTCGACGCAGGACTCGGCTTGCTGAGGTGCACACGGCAAGAGGCGAGGGGCGGCGACTGGTGAGTACGCCTAATATTTTTGACTAGCAGAGGCTAGAAGGAGAGAGATGGGTGCGAGAGCGTCAATATTAAGCGGGGGAAAATTAGATGCTTGGGAGAAAATTCGGTTAAGGCCAGGGGGAAAGAAAAAATATAGACTGAAACATTTGGTATGGGCAAGCAGGGAGCTGGAGAAATTCTCAATTAACCCTGGCCTTTTAGAAACACCAGAGGGATGTAGACAAATAATAAGGCAGTTACAACCAGCTCTCCAAACAGGAACAGAAGAACTTAAATCATTATATAATACAGTAGTAGTCCTCTACTGGGTACATCAAAGGGTAGATGTAAAAGACACCAAGGAAGCTCTAGATAAAATAGAGGAAGAACAAAACAAGCAGAAAACACAGCATGCAGCAGCTGACACAGGGAACAGCAGCAGTCAAAATTATCCCATAGTGCAAAATGCACAAGGGCAAATGGTACACCAGGCTATATCACCTAGGACGTTGAATGCCTGGGTCAAAGTAGTAGAAGAAAAGGCTTTCAGCCCAGAAGTAATACCTATGTTTACAGCATTATCAGAAGGAGCCACCCCACAAGACTTAAATACTATGCTAAACACAGTGGGGGGACATCAAGCAGCTATGCAAATGTTAAAAGATACCATCAATGAGGAAGCTGCAGAATGGGACAGGGTACATCCAGTACATGCAGGGCCTATTCCACCAGGCCAGATGAGAGAACCAAGGGGAAGTGACATAGCAGGAACTACTAGTACCCTTCAGGAACAAATAGGTTGGATGACCAGCGATCCACCCATCCCAGTGGGAGAAATTTATAAAAGATGGATAATCCTGGGATTAAATAAAATAGTAAGAATGTATAGCCCTGTCAGCATTTTGGACATAAGACAAGGGCCAAAAGAACCCTTTAGAGATTATGTGGATAGGTTCTTTAAAACTCTAAGAGCTGAGCAAGCCACACAGGAGGTAAAAAACTGGATGACGGACACCTTGCTGGTCCAAAATGCGAACCCAGATTGTAGATCCATCTTGAGAGCATTAGGACCAGGGGCCTCATTAGAAGAAATGATGACAGCATGTCAGGGAGTGGGAGGACCCAGCCATAAAGCAAGGGTTTTGGCTGAAGCAATGAGCCATGTACAAAGTACAAATACAAACATAATGATGCAGAGAGGCAATTTTAGGGGTCAAAAAAGAATTAAGTGTTTCAACTGTGGCAAGGAAGGACACCTAGCCAGAAATTGCAGGGCCCCTAGGAAAAAGGGCTGCTGGAAATGTGGAAAGGAAGGACATCAAATGAAAGATTGCACTGAGAGACAGGCTAATTTTTTAGGGAAAATTTGGCCTTCCAACAAAGGGAGGCCAGGAAATTTTCCTCAGAGCAGAACAGAGCCAACAGCCCCACCAGCAGAGAACTTGAGAATGGGGGAAGAGATAACCTCCTCCCTGAAGCAGGAACTGGAGACCAGGGAACCATACAATCCTGCAATTTCCCTCAAATCACTCTTTGGCAACGACCCCTTGTTACAGTAAAGATAGAGGGACAGCTAAAAGAAGCTCTATTAGATACAGGAGCAGATGATACAGTGTTAGAAGAAATAAATTTGCCAGGAAAATGGAAACCAAAAATGATAGGGGGAATTGGAGGTTTTATCAAAGTAAGACAATATGATCAGATAGCTATAGAAATTTGTGGAAAAAGGGCCATAGGTACAGTATTAGTAGGACCTACCCCTGTCAACATAATCGGAAGAAATATGTTGGTTCAGCTTGGTTGTACTTTAAATTTTCCAATTAGTCCTATTGAAACTGTACCAGTAAAATTAAAGCCAGGAATGGATGGTCCAAAGGTTAAACAATGGCCATTGACAGAAGAAAAAATAAAAGCATTAACAGAAATCTGTAAAGAAATGGAAAAGGAAGGAAAAATTTCAAAAATTGGGCCTGAAAATCCATACAACACTCCAGTGTTTGCTATAAAGAAAAAAGACAGCACTAAATGGAGAAAATTAGTAGATTTTAGAGAACTCAATAAGAGAACTCAAGACTTCTGGGAAGTTCAGTTAGGAATACCACATCCAGCAGGATTAAAAAAGAAAAAAGCAGTAACAGTACTTGATGTGGGGGACGCATATTTTTCCGTTCCCTTACATGAAGACTTCAGAAAATATACTGCATTCACCATACCTAGTACCAACAATGAGACACCAGGAGTTAGGTATCAGTACAATGTACTTCCACAGGGATGGAAAGGATCACCAGCAATATTCCAGAGTAGCATGACAAAGATCTTAGAGCCCTTTAGATCAAAGAATACAGAATTAATCATCTACCAATACATGGATGACTTGTATGTAGGATCTGATTTAGAAATAAGCCAGCATAGAGTAAAAATAGAGGAATTAAGGGCTCACTTATTGAAATGGGGATTTTATACACCAGACAAAAAACATCAGAAAGAACCTCCATTTCTTTGGATGGGATATGAGCTTCATCCTGACAAATGGACAGTCCAGCCTATAAAGCTGCCAGAAAAAGACAGCTGGACTGTCAATGATATACAGAAATTAGTAGGGAAATTAAATTGGGCAAGTCAGATTTATGCAGGGATTAAAGTAAAGCAACTGTGTAAACTCCTTAGAGGAGCCAAAGCACTAACAGACATAGTAACACTGACTAAAGAAGCAGAGTTAGAATTAGAAGAGAACAGGGAAATTTTAAAAACCCCTGTACATGGGGTATACTATGACCCATCAAAAGACTTAATAGCAGAAATACAGAAACAAGGGCAAGACCAATGGACATATCAAATTTATCAGGAACCCTTTAAGAATCTGAAAACAGGGAAATATGCAAAAAGGAGGTCCACCCACACTAATGATATAAAACAGTTAACAGAAGCAGTACAAAAAATAACCATGGAAAGCATAGTGATATGGGGAAAGACTCCTAAATTTAAATTACCCATACAAAAGGAAACATGGGAGACATGGTGGGCGGAGTATTGGCAGGCTACCTGGATTCCTGAGTGGGAGTTTGTCAATACCCCTCCTCTAGTAAAACTGTGGTACCAGTTAGAAAAAGAACCCATAGCAGGAGCAGAAACTTTCTATGTAGATGGGGCAGCTAATAGAGAGACTAAACTAGGAAAGGCAGGGTATGTCACTGACAGAGGAAGACAAAAAATTGTCTCCCTGACGGAGACAACAAATCAAAAGACTGAATTACATGCAATCTATTTGGCTTTACAGGATTCAGGATTAGAAGTGAACATAGTGACAGATTCACAGTATGCATTAGGAATCATTCAAGCACAACCAGAAAGGAGTGAATCAGAGATAGTCAATCAAATAATAGAAAAATTAATAGAAAAGGAAAGGGTCTACCTATCATGGGTACCAGCACACAAAGGGATTGGAGGAAATGAACAAGTAGACAAATTAGTCAGTTCTGGAATCAGGAAAGTGCTATTTTTAGATGGGATAGATAAGGCTCAAGAGGAACATGAAAGATATCACAGCAATTGGAGAGCAATGGCTCATGACTTTAATCTACCACCTGTAGTAGCAAAAGAAATAGTAGCTAGCTGTGATAAATGTCAGCTAAAAGGGGAAGCCATGCATGGACAAGTAGACTGTAGTCCAGGAATATGGCAACTAGATTGCACACATCTTGAAGGAAAAGTTATCCTGGTGGCAGTCCATGTGGCCAGTGGCTATATAGAAGCAGAAGTCATCCCAACAGAAACAGGACAGGATACAGCATACTTTATATTAAAACTAGCAGGAAGATGGCCAGTAAAAGTAATACATACAGACAATGGGCCCAATTTCATCAGTGCAACAGTTAAGGCAGCCTGTTGGTGGGCAGGTATCCAACAAGAATTTGGGATTCCCTACAATCCCCAAAGTCAAGGAGTAGTGGAATCTATGAATAAAGAATTAAAGAAAATCATAGGGCAGGTAAGAGATCAAGCTGAACACCTTAAGACAGCAGTACAAATGGCAGTATTCATTCACAATTTTAAAAGAAAAGGGGGGATTGGGGGATACAGTGCAGGGGAAAGAATAATAGACATAATAGCAACAGATATACAAACTAAAGAACTACAAAGACAAATTACAAAAATTCAAAATTTTCGGGTTTATTACAGGGACAGCAGAGATCCAATTTGGAAAGGACCAGCAAAACTCCTTTGGAAAGGTGAAGGGGCAGTAGTAATACAAGACAATAGTGACATAAAGGTAGTACCAAGAAGAAAAGCAAAGATCATTAGGGATTATGGAAAACAGATGGCAGGTGATGATTGTGTGGCAGGTAGACAGGATGAGGATTAGAACATGGAACAGTTTAGTTAAACATCATATGTATATTTCAAGGAAAGCTAAAGGTTGGGTCTATAAACATCACTATGAAAGCAGAAATCCAAGAATAAGTTCAGAAGTACACATCCCGCTAGGGGAGGCTAGAATAATAGTAAGAACATATTGGGGTCTGCACATAGGAGAAAAAGACTGGCACTTGGGTCATGGAGTCTCCATAGAATGGAGGCAAAACAGGTATCATACACAAATAGACCCTGATCTGGCAGACCATCTAATCCATCTGTATTATTTTGACTGTTTTTCAGAATCTGCCATAAGGAAAGCCATAATAGGAGAAATAGTTAGTCCTAGGTGTGAATATCAAGCAGGACATAACAAGGTAGGGTCTCTGCAATATTTGGCATTGAAAGCAGTAGTAGCTTCAACAAGGACAAAGCCACCTTTGCCTAGTGTTAGGAAATTAGTAGAGGATAGATGGAACAAGCCCCAGAAGACCAAGGGCCACAGAGGGAGCCATACAATGAATGGATGTTAGAACTGTTAGAGGAGCTCAAGCAGGAAGCTGTTAGACATTTCCCTAGGCACTGGCTACATGGCCTAGGACAATACATCTATAATACCTATGGGGATACCTGGGAAGGAGTTGAAGTTATCATAAGATATCTGCAACAACTACTGTTTGTCCATTTCAGAATTGGGTGCCAACATAGCAGGATAGGCATTATTCGAAGAAGAAGAGTAAGGGATGGAGCCAGTAGACCCTAAACTAGAGCCCTGGAACCATCCGGGAAGTCAGCCTAAAACTGCTTGTACCAAATGTTATTGTAAACGCTGTTGCTATCATTGCCAGTTGTGCTTTATAAACAAAGGCTTAGGCATCTCCTACGGCAGGAAGAAGCGACGACCCCGACGAAAGCCTTCTCCAAGCAATAAGGACCATCAAAATCCTATACCAAAGCAGTAAGTAGTAGTAATTAATATATGTAATGTTACCTTTAGTAATATTGGCAATAGTAGGACTGATAGTAGCTTTAATCTTAGCAATAGTTGTATGGACTATAGTATTCATAGAATATAAGAAAATTAAGAAGCAAAGGAAAATAGACTGGTTAATCAAAAGAATAAGTGAGAGAGCAGAAGACAGTGGCAATGAGAGTGATGGGGACACAGAGGAACTATCAGCACTTGTGGAGAGGGGGCATCTTGATTTTGGGGATGTTAATAATGTGTAAAGCTACAGATTTGTGGGTCACAGTATACTATGGAGTACCTGTGTGGAAAGATGCAGATACCATCCTATTTTGTGCATCAGATGCTAAAGCATATGATACAGAAGTGCATAATGTATGGGCCACACATGCCTGTGTACCCACAGACCCCAACCCACAAGAAATAAACCTGGAAAATGTAACAGAAAATTTTAATATGTGGAAAAATAACATGGTAGAGCAGATGCAAGAAGATATAATCAGCTTATGGGATCAAAGCCTAAAGCCATGTGTAAAATTAACCCCGCTCTGCGTCATTTTAAATTGTAGCAATGCCAATACCAGCACCCATAGCAATAGCAGTAGCACCCAGAGCCCCATTAATGAAGAAATAAAAAACTGCTCTTACAATACTACCACAATACTAAGAGATAAGACACAAAAAGTTTATTCACTGTTTTATAGACTTGATGTAGTACAACTTGATGAAAGTGAAAATAAGAATACATCAGGTAGTAATACTCTGTATAGACTAATAAATTGTAATACCTCAACCATCACACAAGCGTGTCCAAAGGTAACCTTTGAGCCAATTCCTATACATTATTGTGCCCCAGCTGGTTTTGCGATTCTAAAGTGTAAGGATCCGAGATTCAATGGAACAGGGTCATGCAAGAATGTTAGCTCAGTACAATGTACACATGGAATTAAACCAGTAGCATCAACTCAACTGCTGTTGAATGGCAGTCTAGCAGAAGGAGGGAAAATAATGATTAGATCTGAAAATATTACAAACAATGCCAAAAACATAATAGTTCAGTTTACTAAGCCTGTACTAATTACTTGTATCAGACCCAACAACAATACAAGAAAAAGTATACGCTTTGGACCAGGACAAGCCTTCTATACAAATGAAATAATAGGGGACATAAGACAAGCACATTGTAATATCAACAAAACATTATGGAATGACACTTTACAAAAGGTAGCTGAACAATTAAGAGAGAAATTCCCTAAGAAAACCATAATCTTTACTAACTCCTCAGGAGGGGACCCAGAAATTACAACACTTAGTTTTAATTGTGCAGGAGAATTTTTCTATTGCAATACAACAGGCCTGTTTAATGGTACGTGGTGGAACAATGGTACGTGGAACGGGCCCTACACACCTAATAACACCAATGGAAGTATAATCCTCCCATGCAGAATAAAACAAATTATAAACATGTGGCAGAGAGTAGGAAGAGCAATGTATGCCCCTCCCATTGCAGGAATAATAAAGTGTACATCAAACATTACAGGAATAATATTGACAAGAGATGGTGGTAACAATGGGACTAATGAGACCTTCAGACCTGGAGGAGGAGATATGAGGGACAATTGGAGAAGTGAATTATATAAATATAAAGTAGTAAAACTTGAACCACTAGGAGTAGCACCTACCAGGGCAAAAAGAAGAGTGGTGGAGAGAGAAAAAAGAGCAGTTGGACTGGGAGCTGTCTTCCTTGGGTTCTTGGGAGCAGCAGGAAGCACTATGGGCGCGGCGTCACTAACGCTGACGGTACAGGCCAGACAATTATTGTCTGGTATAGTGCAACAGCAAAGCAATTTGCTGCAGGCTATAGAAGCTCAACAGCATCTGTTGAAACTCACAGTCTGGGGCATTAAACAGCTCCAGGCGAGGGTCCTGGCTGTGGAAAGATACCTAAAGGATCAACAGCTCCTGGGAATTTGGGGCTGCTCTGGAAAACTCATCTGCGCCACTACTGTGCCCTGGAACACTAGTTGGAGTAATAAGTCTCAGGATGAGATTTGGGACAACATGACCTGGTTGCAATGGGATAAAGAAATTAGCAATTACACAAACATAATATATAGGTTACTTGAAGAATCGCAAAACCAGCAGGAAAAGAATGAGCAAGACTTATTGGCATTAGACAAATGGGCAGATTTGTGGAGTTGGTTCAACATTTCACACTGGCTGTGGTATATAAGAATATTTATAATGATAGTAGGAGGCTTGATAGGATTAAGAATAGTTTTTGCTATAATTACTGTAGTAAATAGAGTTAGGCAGGGATACTCACCTGTGTCATTTCAGATCCCTACCCCAAGCCCAGAGGGTGCAGACAGACCCGAAGGAATCGAAGAAGAAGGTGGAGAGCAAGACAAAAACAGATCAGTTCGATTAGTGAGCGGCTTCTTAGCGCTTGCCTGGGACGATCTGCGGAACCTGTGCCTCTTCAGCTACCGCCAATTGAGAAACTTAATCTTAATTGTGACGAGGATCCTGGAAAGGGGACTGAGGGGGGGTTGGGAAGCCCTCAAATATCTGTGGAACCTTGTACAGTATTGGAGTCAGGAACTAAAGAATAGTGCTATTAGCTTATTTGATACTATAGCAGTAGCAGTAGCTGAGTGGACAGATAGGGTTATAGAAATAGGGCAAAGAGCTTTCAGAGCTATTCTCAACATACCTAGAAGAATCAGACAGGGCTTAGAAAGGGCTTTACTATAAAATGGGGGGCAAGTGGTCAAAAAGGAGCATACCAGGATGGCCTGCTATTAGGGAGAGAATGAGAAGAACTCCTCCAACAGCACAAAGAACAGAAGCAGTGTCTCCAGCAGCACCAGGAGTAGGAGCAGTGTCTCAAGATTTAGCTACTCATGGAGCAGTCACAAGCAGTAATACAGCAGCTACTAATCCTGATTGCGCCTGGGTGGAAGCGCAAGAAGAGGAGAGTGAAGTAGGCTTCCCAGTCAGGCCACAGGTACCTTTAAGGCCAATGACCTTCAAGGGAGCGTTTGATCTCAGCTTCTTTTTAAAAGAAAAGGGGGGACTGGATGGGTTAATTTACTCCCAGAAAAGACAAGACATCCTTGATATGTGGGTCTACCACACACAAGGCTACTTCCCTGATTGGCAGAATTACACACCAGGGCCAGGGATCAGATACCCATTAACATTTGGATGGTGCTTCAAGCTAGTACCAGTAGAGCCATCTGAGGTAGAAGAAGCTACTCAGGGAGAGAACAACAGCTTATTACACCCTATATGCCAACATGGAGTAGATGACCCTGAAAGAGAAGTGTTAAGATGGGAGTTTGATAGAAGCCTGGCACGGAGACACAGAGCCCGAGAGCTGCATCCGGAGTACTACAAAGACTGCTGACACAGAAGTTGCTGACGGGGACTTTCCGCTGGGGACTTTCCAGGGAGGTGTGGTGTGGGCGGAGTTGGGGAGTGGCTAACCCTCAGATGCTGCATATAAGCAGCTGCTTCTCGCATGTACTGGGTCTCTCTTGTTGGACCAGATAGAGCCCGGGAGCTCTCTGGCTAGCAGGGGAACCCACTGCTTAAGCCTCAATAAAGCTTGCCTTGAGAGCTTC
>B.BR.99.BREPM11932_DQ085870_C.SN.90.90SE_364_AY713416
CTGGTAACTAGAGATCCCTTTGACACTTTTAGTCAGTGTGGAAAATCTCTAGCAGTGGCGCCCGAACAGGGACTTGAAAGCGAAAGTAAGACCAGAGGAGCTCTCTCGACGCAGGACTCGGCTTGCTGAAGCGCGCACAGCAAGAGGCGAGGGGCGGCGACTGGTGAGTACGCCAAAATTTTGACTAGCGGAGGCTAGAAGGAGAGAGATGGGTGCGAGAGCGTCAGTATTAAGCGGGGGAGAATTAGATAGATGGGAAAAGATTCGGTTGAGGCCAGGGGGAAAGAAAACATATAGATTAAAGCATATAGTATGGGCAAGCAGGGAGCTAGAACGATTCGCAGTTAACCCTGGCCTATTAGAAACATCAGGAGGCTGTAGACAAATACTAGAACAGCTACAACCATCCCTTCAGACAGGATCAGAAGAACTTAAATCATTATATAATACACTAGCAGTCCTCTATTGTGTACATCAAAAGATAGATATAAAAGACACCAAGGAAGCTTTAGACCAGATAGAGGAAGAGCAAAACAAAAGTAAGAAAAAAGCACAGCAAGCAGCGGCTGACACAGGAAGCAGCAGCCAGGTCAGCCAAAATTACCCTATAGTGCAGAACCTCCAGGGGCAAATGGTACATCAGCCCTTATCACCTAGAACTTTAAATGCATGGGTAAAAGTAGTAGAAGAGAAGGCTTTCAGCCCAGAAGTAATACCCATGTTTACAGCACTATCAGAAGGAGCCACCCCACAAGATTTAAACACTATGCTAAACACAGTGGGGGGACATCAAGCAGCCATGCAAATGTTAAAAGAGACCATCAATGAGGAAGCTGCAGAATGGGATAGATTGCATCCAGTGCATGCAGGGCCTATTGCACCAGGCCAGCTAAGAGAACCAAGGGGAAGCGACATAGCAGGAACTACTAGTACCCTTCAGGAACAAATAGGATGGATGACACATAATCCACCTATCCCAGTAGGAGAAATCTATAAAAGATGGATAATCTTGGGATTAAATAAAATAGTAAGAATGTATGGCCCTACCAGCATTCTGGACATAAGGCAAGGACCAAAGGAACCCTTTAGAGACTATGTAGACCGGTTCTATAAAACTCTAAGAGCCGAGCAAGCTTCACAGGATGTGAAGAATTGGATGACAGAAACCTTGCTGGTCCAGAATGCAAACCCAGATTGTAAGACTATTTTAAAAGCATTGGGACCAGGAGCTTCACTAGAAGAAATGATGACAGCATGTCAGGGAGTAGGGGGACCCGGCCATAAAGCAAGAGTTTTGGCTGAAGCAATGAGCCAAGTAACAAATCCAACAACCATAATGATGCAGAGGGGCAATTTTAAGAACCAAAGAAAAACTGTTAAATGTTTCAATTGTGGCAAAGAAGGGCACATAGCCAGAAATTGCAGGGCCCCTAGGAAAAAGGGCTGTTGGAAATGTGGAAAGGAAGGACACCAAATGAAAGATTGTACGGAGAGACAGGCTAATTTTTTAGGGAAGATCTGGCCTTCCTCCAAGGGAAGGCCAGGGAATTTTCTTCAGAACAGACCAGAGCCAACAGCCCCACCAGAGGAGAGCTTCAGGTTTGGGGAAGAGACAGCAACTCCCTCTCAGAAGCAGGAGCTGAAAGACAAGGAACTGTATCCTTTAGCCTCCCTCAAATCACTCTTTGGCAACGACCACTAGTCAACATAAAGGTAGGGGGGCAACTAAGGGAAGCTCTATTAGATACAGGAGCAGATGATACAGTATTAGAAGACATAGAGTTGCCAGGAAGATGGAAACCAAAAATGATAGGGGGAATTGGAGGTTTTATCAAAGTAAAACAGTATGATAACATAACCATAGAAATTTGTGGACAAAAGGCTACAGGTACAGTGTTAGTAGGACCTACGCCTGTCAACATAATTGGAAGAAATTTGTTGACTCAGATTGGCTGCACTTTAAATTTTCCCATTAGTCCTATTGAAACTGTACCAGTAAAATTAAAGCCAGGAATGGATGGCCCAAAAGTTAAACAATGGCCATTGACAGAAGAAAAAATAAAAGCATTAGTAGAAATCTGTACAGAAATGGAAAAGGAGGGGAAAATTTCAAAAATTGGGCCTGAAAATCCATACAATACTCCAGTATTTGCCATAAAGAAAAAGGATGGTAGATGGAGAAAGTTAGTGGATTTCAGAGAGCTCAATAAGAGAACTCAAGACTTTTGGGAAGTTCAATTAGGAATACCACATCCCGCAGGGTTAAAAAAGAAAAAATCAGTAACAGTACTAGATGTGGGTGATGCATATTTTTCAGTTCCCTTAGATAAAGACTTCAGGAAGTACACTGCATTTACCATACCTAGTACAAACAATGAGACACCAGGAATTAGATATCAGTACAATGTACTTCCACAGGGATGGAAAGGATCACCAGCAATATTCCAAAGTAGCATGACAAAAATCTTAGAGCCTTTTAGAAAACAAAATCCAGACATAGTTATCTATCAATACATGGATGATTTGTATGTAGGATCTGACTTAGAAATAGGGCAGCATAGAACAAAAATAGAGGAACTAAGACAACATCTGCTGAAGTGGGGGTTTACCACACCAGACAAAAATCATCAGAAAGAACCTCCATTCCTTTGGATGGGTTATGAACTCCATCCTGATAAATGGACAGTACAGCCTATAATGCTGCCAGAAAAAGACAGCTGGACTGTCAATGATATACAGAAGTTAGTGGGAAAATTGAATTGGGCAAGTCAGATTTACCCAGGAATTAAAGTAAAGCACTTATGTAGACTCCTTAGGGGAGCCAAGGCATTAACAGAGGTAGTACCACTAACAGAGGAAGCAGAGCTAGAACTGGCAGAAAACAGGGAGATTCTAAGAGAACCAGTACATGGAGTGTATTATGACCCATCAAAAGACTTAATAGCAGAGATACAGAAGCAGGGGCAAGGCCAATGGACATATCAAATTTATCAAGAGCCATTTAAAAATCTGAAAACAGGAAAGTATGCAAAAATGAGGACTGCCCACACTAATGATGTAAAACAGTTAACAGAGGCAGTGCAAAAAATAGCCACAGAGAGCATAGTAATATGGGGAAAGACTCCTAAATTTAGATTACCCATCCAAAAAGAAACATGGGAGACATGGTGGACAGACTATTGGCAAGCCACCTGGATTCCTGAATGGGAGTTTGTTAATACCCCTCCCCTAGTAAAATTATGGTACCAGCTGGAGAAAGACCCCATAATAGGAGCAGAAACTTACTATGTAGACGGGGCAGCCAATAGGGAAACTAAAAAGGGAAAAGCAGGATATGTTACTGATAGAGGAAGACAAAAGGTTGTTTCCCTAACAGACACAACAAATCAGAAGACTGAGTTACAAGCAATTCATCTAGCTTTGCAGGATTCGGGATCAGAGGTAAACATAGTAACAGACTCACAATACGCGTTAGGAATCATCCAAGCACAACCAGATAAAAGTGAATCAGAATTAGTCAGTCAAATAATAGAGGAGTTAATAAAAAAGGAAAAGGTCTATCTAGCATGGGTGCCAGCACACAAAGGAATTGGAGGAAATGAACAAGTAGATAAATTAGTCAGTACTGGAATCAGGAAAGTACTATTTTTAGATGGAATAGATAAGGCCCAAGATGAACATGAGAAATATCACAGTAATTGGAGATCAATGGCTAGTGATTTTAACCTGCCACCTGTAGTAGCAAAAGAGATAGTAGCCAGCTGTGATAAGTGTCAGCTAAAAGGGGAAGCCATACATGGACAAGTAGACTGTAGTCCAGGAATATGGCAGCTAGATTGTACACACTTAGAAGGAAAAGTTATCCTGGTAGCAGTTCATGTAGCCAGTGGATATATAGAAGCAGAAGTTATTCCAGCAGAAACAGGACAAGAAACAGCATACTTTCTCTTAAAATTAGCAGGAAGATGGCCAGTAAAAACAGTACATACAGACAATGGCAGCAATTTCACTAGTACTGCGGTTAAGGCCGCCTGTTGGTGGGCGGGGATCAAGCAGGATTTTGGCATTCCCTACAATCCCCAAAGTCAAGGAGTAATAGAATCTATGAATAAGGAGTTAAAGAAAATTATAGGACAGGTAAGAGATCAGGCTGAACATCTTAAAACAGCAGTGCAAATGGCAGTCTTCATTCACAATTTTAAAAGAAAAGGGGGGATTGGGGGGTACAGTGCAGGGGAAAGAATAGTAGACATAATAGCAACAGACATACAGACTAAAGAACTACAAAAACAAATTACAAAAATTCAAAATTTTCGGGTTTATTACAGGGACAGCAGAGATCCACTTTGGAAAGGACCAGCAAAGCTGCTTTGGAAAGGTGAAGGGGCAGTAGTAATACAAGATAATAGTGACATAAAAGTAGTGCCAAGAAGAAAAGCAAAGATCATTAGGGATTATGGAAAACAGATGGCAGGTGATGATTGTGTGGCAAGTAGACAGGATGAGGATTAGAACATGGAACAGTTTAGTAAAACACCATATGTATGTTTCAAGGAAAGCTAAGAAATGGGTTTATAAACATCACTATGAAAGCATTAATCCTAGAGTAAGTTCAGAAGTACACATCCCACTAGGGGATGCTAAATTAGTAGTGATAACATATTGGGGTCTGCATACAGGAGAAAGAGACTGGCATTTGGGTCAGGGAGTCTCCATAGAATGGAGGGAAAGGAGATATAGCACACGAATAGACCCTGACCTAGCAGACCAACTAATTCACCTGTATTATTTTGATTGTTTTTCAGAAACTGCTATAAGAAATGCCATATTAGGACGTATAGTTAGACCTAGGTGTGATTATCAAGCAGGACATAAAAAGGTAGGATCTCTGCAGTACTTGGCACTAACAGCATTAATAACACCAAAAAAGATAAAGCCACCTTTGCCCAGTGTTAGGAAACTGACAGAGGATAGATGGAACAAGCCCCAGAAGATCAAGGGCCACAGAGGGAGCCATACAATGAATGGACACTAGAGCTTTTAGAGGAACTTAAGAGTGAAGCTGTCAGACATTTTCCTAGGATATGGCTTCAGGGCTTAGGACAACATATCTATGATACTTATGGGGACACTTGGACAGGAGTGGAAGCCATAATAAGAATTCTGCAACAACTTCTGTTCATTCATTTCAGAATTGGATGTCGACATAGCAGGATAGGCATTACTCCACAAAGAAGAGCAAGGAATGGAGCCAGTAGATCCTAGATTAGAGCCCTGGAAGCATCCAGGGAGTCAGCCTAAAACTCCTTGTACCAAATGCTATTGTAAAAAGTGTTGCTATCATTGTCAAGTTTGTTTCATAACAAAAGGCTTAGGCATCTCCTATGGCAGGAAGAAGCGGAGACAGCGACGAACAGCTTCTCCAGGCAGTCAGACTCATCAAGCTTCTCTATCAAAGCAGTAAGTATTACATGTCATGCAAGATATACAGATATTAGCAATAGTAGCATTAGTAGTAGTAGCAATAATAGCAATAGTTGTGTGGGCCATAGTGCTTATAGAATATAGGAAAATATTAAGACAAAGAAAGATAGACAGGTTAATTGATAGAATAAGAGAAAGAGCAGAAGACAGCGGCAATGAGAGTGAGGGAGACCAAGAAGAATTATTGGCAATGGTGGAGGAGGGGCATGATGCTCCTTGGGATGTTAATGATCTGTAGTGCCACAGAACAATTGTGGGTTACAGTCTACTATGGGGTGCCTGTGTGGAAAGACGCATCCACCACCCTGTTTTGTGCATCAGATGCTAAAGCAGTTGAAACAGAGGCACATAATGTTTGGGCCACACATGCCTGTGTACCCACAGACCCTAACCCACAGGAAGTAGTATTGGAAAATGTGACAGAAAATTTTAACATGTGGAAAAACAACATGGTAGAACAGATGCATGAGGACATAATCAGTTTATGGGATCAGAGCCTCAAGCCATGTGTAAAACTAACCCCACTCTGTGTGACTTTAAGGTGCTCTAGTGTGAATAGTACTGCTAGTGATACTAATAGTACTAATAGTGGTTGGGAAAAGATGGAAGAAGAAATAAGAAACTGCTCTTTCAATGTCACCACAAACATAGGAAGTAAGAGGCAAAAAGAATATGCACTTTTTAATAGACTTGATGTAGTACCAATAGATAATACAAGCTATACACTGATAAATTGTAATACCTCAGTCATTACCCAGGCCTGTCCCAAGATATCCTTTGAACCAATTCCCATACATTATTGTACCCCGGCTGGTTTTGCGATTCTAAAGTGTAATGATAAGAAATTCAATGGAACAGGACCATGTAAAAATGTCAGCACAGTACAATGTACACATGGAATTAGGCCAGTAGTGTCAACTCAACTGCTGTTAAACGGCAGTCTAGCAGAAGAAGAAATAATAATTAGGTCTGAAAATTTCACAAACAATGCTAAAACTATAATAGTACAGCTGAATAAAACTGTAGTAATTAATTGCACAAGACCCAACAACAATACAAGAAAAAGTATTCATCTAGGACCGGGGGGGACAATATATGCAACAGGAGGCATAATAGGAAATATAAGACAAGCACATTGTAACATTAGTGGAGCAGAATGGGAAAACACTTTAAAACAGATAGCTACAAAATTAGGAGGACAATTTAAGAACAAGACAATAGCCTTTAATCAATCCTCAGGAGGGGATCCAGAAATTATAATGCACAGTTTTAATTGTGGAGGGGAATTTTTCTACTGTAATACAACACAGCTGTTTAATAGTACTTGGACGAGGAATGAGACCGCTCACACTTGGAATAGAAATGGGAATGGTACTAATAGTACTATCACACTCCCATGCAGAATAAAACAAATTATAAACAGGTGGCAGGAAGTAGGAAAAGCAATGTATGCCCCTCCCATCCAAGGACAAATTAGATGTTCATCAAATATTACAGGGTTGTTATTAACAAGAGATGGAGGTAACAACAACGGGACCGAGAACAATACCGAGATCTTCAGACCTGGAGGAGGGAATATGAGGGATAATTGGAGAAGTGAATTATACAAATATAAAGTAGTAAGAATTGAGCCATTAGGAGTAGCACCCACCAAGGCAAAGAGGAGAGTGGTGCAGAGAGAAAAGAGAGCAGTGGGAATAGGAGCTGTGTTCCTTGGGTTCTTGGGAGCAGCAGGAAGCACTATGGGCGCAGCGTCAATAACGCTGACGGTACAGGCCAGACAATTATTGTCTGGTATAGTGCAACAGCAGAACAATCTGCTGAGAGCTATTGAGGCGCAACAACATATGTTGCAACTCACAGTCTGGGGCATCAAGCAGCTCCAGGCAAGAGTCCTGGCTGTAGAAAGATACCTAAAGGATCAACAGCTCCTAGGAATTTGGGGTTGCTCTGGAAAACTCATCTGCCCCACTGCTGTGCCTTGGAATGCTAGTTGGAGTAATAGATCTCTGGATGACATTTGGCATAACATGACCTGGATGCAGTGGGAGAAAGAAATTGACAATTACACAGACTTAATATACAGCTTAATTGAAGAATCGCAAAACCAACAGGAAAAGAATGAACAAGAATTATTGCAATTGGATGCATGGGCAAGTTTATGGAATTGGTTTAGCATAACAAAATGGCTGCGGTATATACAATTATTCATAATGATAGTAGGAGGCTTAATAGGTTTAAGAATAGTTTTTGCTGTACTTTCTATAGTAAATAGAGCTAGGCAGGGATACTCACCATTATCGTTCCAGACCCGCCTCCCAGACCAGAGGGGACCCGACAGGCCCGGAGGAATCGAAGAAGAAGGTGGAGAGAGAGACAAAGACAGATCCGTTCGCTTAGTGAATGGATTATTAGCAATCATCTGGGACGACCTACGGAGCCTGTGCCTTTTCAGCTACCACCGCTTGAGAGACTTACTCTTGATTGTGACAAGGGTTGTGGAACTTCTGGGACGAAGGGGGTGGGAAGTCCTCAAATATCTGGGGAACATCCTGCAGTATTGGAGTCAGGAACTAAAGAATAGTGCTGTTAGCTTGCTTAATGCCACAGCTATAGCAGTAGCTGAGGGGACAGATAGGATTATAGAACTAGTACAAAGACTTTGTAGAGCTATTCTCCACATACCTACAAGAATAAGACAGGGCTTTGAAAGGGCTTTGCTATAAGATGGGTGGCAAATGGTCAAAACGTAGCATGGGTGGATGGGATGCTGTAAGGGAAAGAATGAGGCGAACTAGGCCAGCAGCTGAGCCAGCAGCAGATGGGGTGGGAGCAGTATCTCGAGACTTGGAAAAACATGGAGCAATTACAAGTAGCAATACAGCAGCTACTAATGCTGATTGTGCCTGGGTAGAAGCACAGGAGGATGA
>B.ES.89.S61K15_AF256210_D.ZA.85.R286_AY773340
TGGAAGGGCTAATTTGGTCCCAGAAAAGACAAGATATCCTTGATCTGTGGGTCCACCACACACAAGGCTACTTCCCTGATTGGCAGAACTACACACCAGGGCCAGGGATCAGATATCCACTGACCTTTGGATGATGTTTCAAGCTAGTACCAGTGGAGCCAGAGAAGGTAGAAGAGGCCAATGAAGGAGAGAACAACAGCTTGTTACACCCTGTGAGCCTGCATGGGATGGAGGACCCGGAGAAAGAAGTGTTAGTATGGAGGTTTGACAGCCGCCTAGCACTCCGTCACATGGCCCGAGAGCTGCATCCGGAGTACTACAAGGACTGCTGACACCGAGCTTTCTACAAGGGACTTTCCGCTGGGGACTTTCCAGGGAGGCGTGGCCTGGGCGGGACTGGGGAGTGGCGAGCCCTCAGATGCTGCATATAAGCAGCCGCTTTTGCCTGTACTGGGTCTCTCTTGTTAGACCAGATCTGAGCCTGGGAGCTCTCTGGCTAACTAGGGAACCCACTGCTTAAGCCTCAATAAAGCTTGCCTTGAGTGCTTCAAGTAGTGTGTGCCCGTCTGTTGTGTGACTCTGGTAACTAGAGATCCCTCAGACCCTTTTAGTCAGTGTGAAAAATCTCTAGCAGTGGCGCCCGAACAGGGACTTGAAAGCGAAAGGGAAACCAGAGAAGCTCTCTCGACGCAGGACTCGGCTTGCTGAAGCGCGCACGGCAAGAGGCGAGGGGACGGCGACTGGTGAGTACGCCAAAATTTTGACTAGCGGAGGCTAGAAGGAGAGAGATGGGTGCGAGAGCGTCGGTATTAAGCGGGGGAGGATTAGATAAATGGGAAAAAATTCGGTTAAGGCCAGGGGGAAAGAAAAAATATAGATTAAAACATTTAGTATGGGCAAGCAGGGAGCTAGAACGATTCGCAGTCAATCCTGGCCTATTAGAAACATCAGAAGGATGTAGACAAATACTGGGACAGCTACAACCATCCCTTCAGACAGGATCAGAAGAACTTAGATCATTATATAATACAGTAGCAACCCTCTATTGTGTGCATCAAAAGATAGATGTAAAAGACACCAAGGAAGCTTTAGATAAGATAGAGGAAGAGCAAAACAAAAGTAAGAAAAAAGCACAGCAAGCAGCAGCTGACACAGGAAACAGCAGCCAGGTCAGCCAAAATTACCCTATAGTGCAGAACATCCAGGGGCAAATGGTACATCAGGCCATATCACCTAGAACTTTAAATGCATGGGTAAAAGTAGTAGAAGAAAAGGCTTTCAGCCCAGAAGTAATACCCATGTTTTCAGCATTATCAGAAGGAGCCACCCCACAAGATTTAAACACCATGCTAAACACAGTGGGGGGACATCAAGCAGCCATGCAAATGTTAAAAGAGACCATCAATGAGGAAGCTGCAGAATGGGATAGATTGCATCCAGTGCATGCAGGGCCTCATCCACCAGGGCAGATGAGAGAACCAAGGGGAAGTGACATAGCAGGAACTACTAGTACCCTTCAGGAACAAATAGCATGGATGACAAATAATCCACCTATCCCAGTAGGAGAAATCTATAAGAGATGGATAATCCTGGGGTTAAATAAAATAGTAAGAATGTATAGCCCTACCAGCATTCTGGACATAAAACAAGGACCAAAGGAACCCTTTAGAGACTATGTAGACCGGTTCTATAAGACTCTAAGAGCCGAGCAAGCTTCACAGGAGGTAAAAAATTGGATGACAGAAACCTTGTTGGTCCAAAATGCGAACCCAGATTGTAAGACTATTTTAAAAGCATTGGGACCAGCAGCTACACTAGAAGAAATGATGACAGCATGTCAGGGAGTGGGAGGACCCGGCCATAAAGCAAGAGTCTTGGCAGAAGCAATGAGCCAAGTAACAAATTCAGCTACCATAATGATGCAGAAAGGCAATTTTAGGAACCAAAGAAAGATTGTTAAGTGTCTCAATTGTGGCAAAGAAGGGCACATAGCCAAAAATTGCAGGGCCCCTAGGAAAAGGGGCTGTTGGAAATGTGGAAAGGAGGGACACCAAATGAAAGATTGTACTGAGAGACAGGCTAATTTTTTAGGGAAAATCTGGCCTTCCCACAGGGGAAGGCCAGGGAATTTTCCTCAGAACAGGCTAGAGCCAACAGCCCCACCAGCCCCACCAGAAGAGATCTTCAGGTTTGGGGAAGAGACAACAACTCCCTCTCAGAAGCAGGAGATGATAGACAAGGAACTGTATCCTTCAGCTTCCCTCAAATCACTCTTTGGCAACGACCCCTTGTCACAATAAAGATAGGGGGGCAACTAAAGGAAGCTCTATTAGATACAGGAGCAGATGATACAGTATTAGAAGAAATAAATTTGCCAGGAAGATGGAAACCAAAAATGATAGGGGGAATTGGAGGTTTTATCAAAGTAAGACAGTATGATCAAATACTCGTAGAAATCTGTGGACATAAAGCTATAGGTACAGTATTAGTAGGACCTACACCTGTCAACATAATTGGAAGAAATCTGTTGACTCAGATTGGTTGCACTTTAAATTTTCCCATTAGTCCTATTGAAACTGTACCAGTAAAATTAAAGCCAGGAATGGATGGCCCAAAAGTTAAACAATGGCCATTGACAGAAGAAAAAATAAAAGCATTAGTAGAAATCTGTACAGGAATGGAAAAGGAAGGGAAAATTTCAAAAATTGGGCCTGAAAATCCATATAATACTCCAGTATTTGCCATAAAGAAAAAAGACAGTACTAAATGGAGAAAATTAGTAGATTTCAGAGAACTTAATAAGAAAACTCAAGACTTCTGGGAAGTTCAATTAGGAATACCACATCCCGCAGGGTTAAAAAAGAAAAAATCAGTAACAGTACTGGATGTGGGTGATGCATATTTTTCAGTTCCCTTAGATAAAGAATTCAGGAAGTACACTGCATTTACCATACCTAGTATAAACAATGAGACACCAGGGATTAGATATCAGTACAATGTGCTTCCACAGGGATGGAAAGGATCACCAGCAATATTCCAAAGCAGCATGACAAAAATCTTGGAGCCTTTTAGAAAACAAAATCCAGACATAGTTATCTATCAATACATGGATGATTTGTATGTAGGATCTGACTTAAAAATAGGGCAGCATAGAACAAAAATAGAGGAACTGAGACAACATCTGTTGAAGTGGGGATTTACCACACCAGACAAAAAACATCAGAAAGAACCTCCATTCCTTTGGATGGGTTATGAACTCCATCCTGATAAATGGACAGTACAGCCTATAGTGCTGCCAGAAAAGGACAGCTGGACTGTCAATGACATACAGAAGTTAGTGGGAAAATTGAATTGGGCAAGTCAGATTTACCCAGGGATTAAAGTAAAGCAATTATGTAGACTCCTTAGGGGAACCAAGGCACTAACAGAAGTAATACCACTAACAAAAGAAGCAGAGCTAGAACTGGCAGAAAACAGGGAAATTCTAAAAGAACCAGTACATGGAGTGTATTATGACCCATCAAAAGACTTAATAGCGGAAATACAGAAGCAGGGGCAAGGTCAATGGACATATCAAATTTATCAAGAGCCATTTAAAAATCTGAAAACAGGAAAATATGCAAGAATGAGGGGTGCCCACACTAATGATGTAAAACAATTAACAGAGGCAGTGCAAAAAATAACCACAGAAAGCATAGTAATATGGGGAAAGACTCCTAAATTTAAACTACCCATACAAAAAGAAACATGGGAAACATGGTGGACAGAGTATTGGCAAGCCACCTGGATTCCTGAGTGGGAGTTTGTCAATACCCCTCCCTTAGTAAAATTATGGTACCAGTTAGAGCAAGAACCCATAACAGGAGTAGAAACTTTCTATGTAGATGGGGCAGCTAACAGGGAGACTAAATTAGGAAAAGCAGGATATGTTACTAACAAAGGGAGACAAAAAGTTGTCTCCATAACTGACACAACAAATCAGAAGACTGAGTTACAAGCAATTCTTCTAGCTTTACAGGATTCGGGATTAGAAGTAAACATAGTAACAGACTCACAATATGCATTAGGAATCATTCAAGCACAACCAGATAAAAGTGAATCAGAGATAGTCAGTCAAATAATAGAGCAGTTAATAAAAAAGGAAAAGGTCTACCTGGCATGGGTACCAGCGCACAAAGGAATTGGAGGAAATGAACAAGTAGATAAATTAGTCAGTACTGGAATCAGGAAAGTGCTATTTTTAGATGGAATAGATAAAGCCCAAGAAGAACATGCGAAATATCACAACAATTGGAGAGCAATGGCTACTGCTTTTATCCTACCACCTGTAGTAGCCAAAGAAATACTATCTAGCTGTGATAAATGTCAGCTACAAGGAGAAGCCATGCATGGACAAGTATACTGTAGTCCAGGAATATGGCAATTAGATTGTACACATCTAGAAGGAAAAGTTATCATAGTAGCAGTTCATGTAGCCAGTGGCTATATAGAAGCAGAAGTTATTTCAGCAGAAACAGGGCAGGAAACAGCATACTTTCTCTTAAAATTAGCAGGAAGATGGCCAGTAAAAACAATACATACAGACAATGGCAGCAATTTCACCAGTACTACGGTTAAGGCCGCCTGTTGGTGGGCGGGAATCAAGCAGGAATTTGGCATTCCCTACAATCCCCAAAGTCAAGGAGTAGTAGAATCTATAAATAAAGAATTAAAGAAAATTATAGGACAGATAAGAGATCAGGCTGAACATCTTAAGACAGCAGTACAAATGGCAGTATTCATCCACAATTTTAAAAGAAAAGGGGGGATTGGGGGGTACAGTGCAGGGGAAAGAATAGTAGACATAATAGCAACAGACATACAAACTAAAGAACTACAAAAACAAATTACAAAAATTCAAAATTTTCGGGTTTATTACAGGGACAGCAGAGATCCACTTTGGAAAGGACCAGCAAAGCTTCTCTGGAAAGGTGAAGGGGCAGTAGTAATACAAGATAATAGTGAAATAAAAGTAGTACCAAGAAGAAAAGCAAAGATCATTAGGGATTATGGAAAACAGATGGCAGGTGATGATTGTGTGGCAAGTAGACAGGATGAGGATTAGAACATGGAAAAGTTTAGTAAAACACCATATGTATGTTTCAAGGAAAGCTAAGGGATGGTTTTATAGACATCACTATGAAAGCACTCATCCGAGAATAAGTTCAGAAGTACACATCCCACTAGGGGATGCGAAATTGGTAATAACAACATATTGGGGTTTACATACAGGAGAAAGAGACTGGCATTTGGGTCAGGGAGTCTCCATAGAATGGAGGGAAAAGAGATATAGCACACAATTAGACCCTAACCTAGCAGACCAACTAATTCATCTGCATTACTTTGATTGTTTTTCAGAATCTGCTATAAGAAATGCCATATTAGGACATGTAGTTAGCCCTAGGTGTGAATATCAAGCAGGACATAACAAGGTAGGATCTCTACAGTACTTGGCACTAACAGCATTAATAAGACCAAGAAAAAAGATAAAGCCACCTTTGCCTAGTGTTACGAAACTGACAGAGGATAGATGGAACAAGCCCCAGAAGACCAAGGGCCACAAAGGGAGCCATACAATGAATGGACACTAGAACTGTTAGAGGAGCTCAAGAATGAAGCTGTTAGACATTTTCCTAGGATATGGCTCCAGAGCTTAGGGCAATATATCTATGAAACTTATGGAGATACTTGGGCAGGAGTGGAAGCCATAATAAGAATTCTGCAACAACTGCTGTTTATTCATTTCAGAATTGGGTGTCAACATAACAGAATAGGCATTCTTCGACGAAGGAGAGCAAGAAATGGAGCCAGTAGATCCTAGACTAGAGCCCTGGAAGCATCCAGGAAGTCAGCCTAAGACTGCTTGTACCAATTGCTATTGTAAAAAGTGTTGCTTTCATTGCCAAGTTTGTTTCATAACAAAAGGCTTAGGCATCTCCTATGGCAGGAAGAAGCGGAGACAGCGACGAAGAGCTCCTCAAGACAGTCAGACTCATCAAGTTTCTCTATCAAAGCAGTAAGTAGTACATGTAATGCAATCTTTACAAATATTAGCAGTAGTAGCATTAGTAGTAGCAGCAATAATAGCAATAGTTGTGTGGTCCATAGTATTCATAGAGTGTAGGAAAATAAGAAGACAAAAGAAAATAGAAAGGTTAATTGATAGAATAATAGAAAGAGCAGAAGACAGTGGCAATGAGAGTGACGGAGATCAGGAAGAATTATCAGCACTTGTGGAAATGGGGCACGATGCTCCTTGGGATGTTAATGATCTGTAAAGCTGCAGAAAATTTGTGGGTCACAGTTTATTATGGGGTACCTGTGTGGAAAGAAGCAACCACCACTCTATTTTGTGCCTCAGATGCTAAAGCGTATGATACAGAGGTACATAATGTTTGGGCCACACATGCCTGTGTACCCACAGACCCCAACCCACAAGAAGTAGAACTGAAGAATGTGACAGAAAATTTTAACATGTGGAAAAATAACATGGTAGACCAAATGCATGAGGATATAATTAGTTTATGGGATCAAAGCCTAAAGCCATGTGTAAAACTAACCCCACTCTGTGTTACTTTAAATTGCACTGATTATGGGAATGATACTAACACCAATAATAGTAGTGCTACTAACCCCACTAGTAGTAGCGGGGGAATGGGGGGGAGAGGAGAAATAAAAAATTGCTCTTTCAATATCACCACAAGCATAAGAGATAAGGTGCAGAAAGAATATGCACTTTTTTATAGTCTTGATGTAATACCAATAAAAGATGATAATACTAGATATATGTTGAGAAGTTGTAACACCTCAGTCATTACACAGGCTTGTCCAAAGGTATCCTTTGAGCCAATTCCCATACATTATTGTGCCCCGGCTGGTTTTGCGATTCTAAAGTGTAATGATAAAAAGTTCAATGGAAAAGGACCATGTACAAATGTCAGCACAGTACAATGTACACATGGAATTAGGCCAGTAGTATCAACTCAACTGCTGTTAAATGGCAGTCTAGCAGAAGAAGAGGTAGTAATTAGATCAGACAATTTCTCGGACAATGCTAAAGTCATAATAGTACATCTGAATGAATCTGTAGAAATTAATTGTACAAGACTCAACAACAATACAAGGAGAAGTATACATGTAGGACATGTAGGACCAGGCAGAGCAATTTATACAACAGGAATAATAGGAAAAATAAGACAAGCACATTGTAACATTAGTAGAGCAAAATGGAATAACACTTTAAAACATATAGTTACAAAATTAAGAGAACAATTTGGGAATAAAACAATAGTCTTTAATCAATCCTCAGGAGGGGACCCAGAAATTGTAATGCACAGTTTTAATTGTGGAGGAGAATTTTTCTACTGTAATTCAACACAACTGTTTAACAGTACTTGGAATGGTACTGCATGGTCAAATAACACTGAAGGAAATGAAAATGACACAATCACACTCCCATGCAGAATAAAACAAATTATAAACATGTGGCAGGAAGTAGGAAAAGCAATGTATGCCCCTCCCATCAAAGGACAAATTAGATGTTCATCAAATATTACAGGGCTGATATTAACAAGAGATGGTGGTATTAACCAGACCAACACCACCGAGATTTTCAGGCCTGGAGGAGGAAATATGAAGGACAATTGGAGAAGTGAATTATATAAATATAAAGTAGTAAAAATTGAACCATTAGGAGTAGCACCCACCAAGGCAAAGAGAAGAGTGGTGCAAAGAGAAAAAAGAGCAGTGGGAATAATAGGAGCTATGCTCCTTGGGTTCTTGGGAGCAGCAGGAAGCACTATGGGCGCAGCGTCAATGACGCTGACGGTACAGGCCAGACAATTATTGTCTGGTATAGTGCAACAGCAGAACAATTTGCTGAGGGCTATTGAGGCGCAACAGCATCTGTTGCAACTCACAGTCTGGGGCATCAAGCAGCTCCAAGCAAGAGTCCTGGCTGTGGAAAGATACCTAAGGGATCAACAGCTCCTGGGGATTTGGGGTTGCTCTGGAAAATTCATTCGCACCACTGCTGTGCCTTGGAATACTAGTTGGAGTAATAAATCTCTGAATCAGATTTGGGATAACATGACCTGGATGCAGTGGGAAAGGGAAATTGATAATTACACAAGCTTAATATACACCTTAATTGAAGAATCGCAAAACCAACAAGAAAAGAATGAACAAGAGTTATTGGAATTAGATAACTGGGCAAGTTTGTGGAATTGGTTTAGCATAACAAATTGGCTGTGGTATATAAAAATATTCATAATGATAGTAGGAGGCTTGGTAGGTTTAAGAATAGTTTTTACTGTACTTTCTATAGTAAATAGAGTTAGGCAGGGATACTCACCATTGTCGTTTCAGACCCGCCTCCCAGCCAGGAGGGGACCCGACAGGCCCGAAGGAATCGAAGAAGAAGGTGGAGAGAGAGACAGAGACAGATCCGGTCAATTAGTGGATGGATTCTTAGCAATTATCTGGGTCGACCTGCGGAGCCTGTGCCTCTTCAGCTACCACCGCTTGAGAGACTTACTCTTGATTGTGACGAGGATTGTGGAACTTCTGGGACGCAGGGGGTGGGAAGCCCTCAAATATTGGTGGAATCTCCTACAATATTGGATTCAGGAACTAAAGAATAGTGCTGTTAGCTTGCTCAACGCCACAGCCATAGCAGTAGCTGAGGGGACTGATAGGGTTATAGAAGTATTACAAAGAGCTTTTAGAGCTATTCTCCACATACCTAGAAGAATAAGACAGGGCTTGGAAAGGGCTTTGCAATAAGATGGGTGGCAAGTGGTCAAAAAGTAGTAAAATTGGATGGCCTACTGTAAGGGAAAGAATGAGAAGAGCTGAGCCAGCAGCAGATGGGGTGGGAACAGTATGAAGCACAAGAGGAGGAGGAAGTGGGTTTTCCAGTCAGACCTCAGGTACCTCTAAGACCAATGACTTACAAGGCAGCGTTCGATCTTAGCCACTTTTTAAAAGAAAAGGGGGGAC
>B.AU.86.MBC200_AF042100_F1.FR.96.MP411_AJ249238
TGGAAGGGCTAATTTACTCTCAAGAAAGACAAGATATCCTTGATCTGTGGGTCTACGACACACAAGGCTACTTCCCTGATTGGCAGAACTACACACAGGGCAGGGCTAGATGGCCACTGACCTTTGGATGGTGCTTCAAGCTAGTACCAGTTGAGCCAGAGAAGATAGAAGAGGCCAATGCAGGAGAGAACAACTGCTTGTTACACCCTATGAGCCAGCATGGAATGGATGACCCGGAGAGAGAAGGGTTAGAGTGGAGGTTTGACAGCCGCCTAGCATTTCATCACGTGGCCCGAGAGCTGCATCCGGAGTACTACAAGAACTGATGACCTCGAGCTTTCTACAAGGGACTTTCCGCTGGGGACTTTCCAGGGAAGGCGTGGCCTGGGCGGGACTGGGGAGTGGCGAGCCCTCAGATGCTGCATATAAGCAGCTGCTTTTGCCTGTACTGGGTCTCTCTGGTTAGACCAGATCTGAGCCTGGGAGCTCTCTGGCTAGCTAGGGAACCCACTGCTTAAGCCTCAATAAAGCTTGCCTTGAGTGCTTTAAGTAGTGTGTGCCCGTCTGTTGTGTGACTCTGGTAACTAGAGATCCCTCAGACCCTTTTAGTCAGTGTGGAAAATCTCTAGCAGTGGCGCCCGAACAGGGACTTGAAAGCGAAAGGAAAACCAGAGGAGCTCTCTCGACGCAGGACTCGGCTTGCTGAAGCGCGCACGGCAAGAGGCGAGGGGCGGCGACTGGTGAGTACGCCAAAAAATTTTTGACTAGCGGAGGCTAGAGGAGGAGAGATGGGTGCGAGAGCGTCAGTATTAAGCGGGGGAGAATTAGATCGATGGGAAAAAATTCGGTTAAGGCCAGGGGGAAAGAAACAATATCGATTAAAACATATAGTATGGGCAAGCAGGGAGCTAGAACGATTCGCAGTTAATCCTGGCCTGTTAGAAACATCAGAGGGCTGTAGACAAATACTGGGACAGCTACAACCATCCCTTAAGACAGGATCAGAAGAAATTAAATCATTATATAATACAGTAGCAACACTCTATTGTGTGCATCAAAAGATAGAGGTAAAAGACACCAAGGAAGCTTTAGAGAAGATAGAGGAAGAGCAAAACAAAAGTAAGAAAAAGGCACAGCAAGCAGCAGCTGACACAGAAAACAGCAGCCAGGTCAGCCAAAATTACCCTATAGTGCAGAACCTCCAGGGGCAAATGGTACATCAGGCCATATCACCTAGAACTTTAAATGCATGGGTAAAAGTAGTAGAAGAGAAGGCTTTTAGCCCAGAGGTAATACCCATGTTTTCAGCATTATCAGAAGGAGCCACCCCACAAGATTTAAACACCATGCTAAATACAGTGGGGGGACATCAAGCAGCCATGCAAATGTTAAAAGAGACCATCAATGAGGAAGCTGCAGAATGGGATAGATTGCATCCAGTGCATGCAGGGCCTATTGCACCAGGCCAGATGAGAGAACCAAGGGGAAGTGACATAGCAGGAACTACTAGTACCCTTCAGGAACAAATAGGATGGATGACAAATAATCCACCTATCCCAGTAGGAGAAATATATAAAAGATGGATAATCCTGGGATTAAATAAAATAGTAAGGATGTATAGTCCTACCAGCATTCTGGACATAAGACAAGGACCAAAGGAACCCTTTAGAGACTATGTAGACAGGTTTTATAAAACTCTAAGAGCTGAGCAAGCTTCACAGGAGGTAAAAAATTGGATGACAGAAACCTTGTTGGTCCAAAATGCGAACCCAGATTGTAAGACTATTTTAAAAGCATTGGGACCAGGGGCTACACTAGAAGAAATGATGACAGCATGTCAGGGAGTGGGAGGACCCGGCCATAAAGCAAGAGTTTTGGCGGAAGCAATGAGCCAAGTAACAAATTCAGCTACCATAATGATGCAGAGAGGCAATTTTAGGAACCAAAGAAAAACTGTTAAATGTTTCAATTGTGGCAAAGAAGGGCACATAGCCAGAAATTGCAAGGCCCCTAGGAAAAGGGGCTGTTGGAAATGTGGAAAGGAAGGACACCAAATGAAAGATTGTACTGAAAGACAGGCTAATTTTTTAGGGAAGATCTGGCCTTCCTACAAGGGAAGGCCGGGAAATTTTCTTCAGAGCAGACCAGAGCCAACAGCCCCACCAGCAGAGAGCTTCAGGTTTGGGGAAGAGACAACAACTCCCTCTCAGAAGCAGGAGCCGATAGACAAGGAACTGTATCCTTTAGCTTCCCTCAGATCACTCTTTGGCAACGACCCCTCGTCACAATAAAGATAGGGGGGCAACTAAAGGAAGCTCTATTAGATACAGGAGCAGATGATACAGTAGTAGAAGAAATGAATTTGCCAGGAAGATGGAAACCAAAAATGATAGGGGGAATTGGAGGTTTTATCAAAGTAAGACAGTATGATCAGATACTCATAGAAATCTGTGGACATAAAGCTATAGGTACAGTATTAGTAGGACCTACACCTGTCAACATAATTGGAAGAAATCTGTTGACTCAGATTGGTTGCACTTTAAATTTTCCCATTAGTCCTATTGAAACTGTACCAGTAAAATTAAAGCCAGGAATGGATGGCCCAAAAGTTAAACAATGGCCATTGACAGAAGAAAAAATAAAAGCATTAGTAGAAATTTGTACAGAAATGGAAAAGGAAGGGAAGATTTCAAAAATTGGGCCTGAAAATCCATACAATACTCCAGTATTTGCCATAAAGAAAAAAGACAGTACTAAATGGAGAAAATTAGTAGATTTCAGAGAACTTAATAAGAGAACTCAAGACTTCTGGGAAGTTCAATTAGGAATACCACATCCCGCAGGGTTAAAAAAGAAAAAATCAGTAACAGTACTGGATGTGGGTGATGCATATTTTTCAGTTCCCTTAGATAAAGAATTCAGGAAGTATACTGCATTTACCATACCTAGTATAAACAATGAGACACCAGGGATTAGATATCAATACAATGTGCTTCCACAGGGATGGAAAGGATCACCAGCTATATTCCAAAGTAGCATGACAAAAATCTTAGAGCCTTTTAGAAAACAAAATCCAGAAATAGTTATCTATCAATACATGGATGATTTGTATGTAGGATCTGACTTAGAAATAGGGCAGCATAGAACAAAAATAGAGGAACTGAGACACCATCTGTTGAGGTGGGGATTTACCACACCAGACAAAAAACATCAGAAAGAACCTCCATTCCTTTGGATGGGTTATGAACTCCATCCTGATAAATGGACAGTACAGCCTATAGTGCTGCCAGAAAAAGACAGCTGGACTGTCAATGACATACAGAAGTTAGTGGGAAAATTGAATTGGGCAAGTCAGATTTACCCAGGGATTAAAGTAAAGCAATTATGTAAACTCCTTAGGGGAACCAAAGCACTAACAGAAGTAGTACCACTAACAAAAGAAGCAGAGCTAGAACTGGCAGAAAACAGGGAAATTCTAAAAGAACCAGTACATGGAGTGTATTATGACCCATCAAAAGACTTAATAGCAGAAATACAGAAGCAGGGGCAAGGCCAATGGACATATCAAATTTATCAAGAGCCATTTAAAAATCTGAAAACAGGAAAATATGCAAGAATGAGGGGTGCCCACACTAATGATGTAAAACAATTAACAGAGGCAGTACAAAAAATAACCACAGAAAGCATAGTAATATGGGGAAAGACTCCTAAATTTAGACTACCCATACAAAAAGAAACATGGGAAACATGGTGGACAGAGTATTGGCAAGCCACCTGGATTCCTGAGTGGGAGTTTGTCAATACCCCTCCCTTAGTGAAATTATGGTACCAGTTAGAGAAAGAACCCATAGTAGGAGCAGAAACTTTTTATGTAGATGGGGCAGCTAACAGGGAGACTAAATTAGGAAAAGCAGGATATGTTACTAACAGAGGAAGACAAAAGGTTGTCCCCCTAACTGACACAACAAATCAGAAGACTGAGTTACAAGCAATTCATCTAGCTCTGCAGGATTCGGGATTAGAAGTAAACATAGTAACAGACTCACAATATGCATTAGGAATCATTCAAGCACAACCAGATAAAAGTGAATCAGAGTTAGTCAGTCAAATAATAGAGCAGTTAATAAAAAAGGAAAAGGTCTACCTGGCATGGGTACCAGCACACAAAGGAATTGGAGGAAATGAACAAGTAGATAAATTAGTCAGTGCTGGAATCAGGAAAGTACTATTTTTAGATGGGATAGATAAGGCCCAAGAGGAGCATGAGAAATATCACAGTAATTGGAGAGCAATGGCTAGTGATTTTAACCTGCCACCTGTAGTAGCAAAAGAAATAGTAGCCAGCTGTGATAAATGTCAGCTAAAAGGAGAAGCCATGCATGGACAAGTAGACTGTAGTCCAGGAATATGGCAACTAGATTGTACACATTTAGAAGGAAAAGTTATCCTGGTAGCAGTTCATGTAGCCAGTGGATATATAGAAGCAGAAGTTATTCCAGCAGAGACAGGGCAGGAAACAGCATACTTTCTCTTAAAATTAGCAGGAAGATGGCCAGTAAAAGCAATACATACAGACAATGGCAGCAATTTCACCAGTACTACGGTTAAGGCCGCCTGCTGGTGGGCGGGGATCAAGCAGGAATTTGGCATTCCCTACAATCCCCAAAGTCAAGGAGTAGTAGAATCTATGAATAAAGAATTAAAGAAAATTATAGGACAGGTAAGAGATCAGGCTGAACATCTTAAGACAGCAGTACAAATGGCAGTATTCATCCACAATTTTAAAAGAAAAGGGGGGATTGGGGATTACTGTGCAGGGGAAAGAATAGTAGACATAATAGCAACAGACATACAAACTAAAGAATTACAGAAACAAATTACAAAAATTCAAAATTTTCGGGTTTATTACAGGGACAGCAGAGATCCACTTTGGAAAGGACCAGCAAAGCTCCTCTGGAAAGGTGAAGGGGCAGTAGTAATACAAGATAATAGTGACATAAAAGTAGTGCCAAGAAGAAAAGCAAAGATCATTAGGGATTATGGAAAACAGATGGCAGGTGATGATTGTGTGGCAGGTAGACAGGATGAGGATTAGAACATGGAAAAGTTTAGTAAAACACCATATGTATATTTCAGGGAAAGCTAAGGGATGGGCTTATAGACATCACTATGAAAGCACTCATCCAAGAATAAGTTCAGAAGTACACATCCCAGTAAGGGAAGCTAAATTGGTAATAACAACATATTGGGGTCTGCATACAGGAGAAAGAGACTGGCATTTGGGTCAGGGAGTCTCCATAGAGTGGAGGAAAAAGAGATATAGCACACAAGTAGACCCTGACCTAGCAGACCAACTAATTCATCTGTATTACTTTGATTGTTTTTCAGAATCTGCTATAAGAAATGCCATATTAGGAAATAGAGTTAGTCCTAGGTGTGAATATCAAGCAGGACATAACAAGGTAGGATCTCTACAGTACTTGGCACTAGCAGCATTAATAACACCAAAAAAGATAAAGCCACCTTTGCCTAGTGTTGCGAAACTGACAGAGGATAGATGGAACAAGCCCCAGAAGACCAAGGGCCACAGAGGGAGCCATACAATGAATGGACACTAGAGCTTTTAGAGGAGCTTAAGAATGAAGCTGTCAGACACTTTCCTAGGATATGGCTCCATGGCTTAGGGCAACATATCTATGAAACTTATGGGGATACTTGGGCAGGAGTGGAGGCCATAATAAGAATTCTGCAACAACTGCTGTTTATTCATTTCAGAATTGGGTGTCAACATAGCAGAATAGGCATTATTCAACAGAGGAGAGCAAGAAATGGAGCCAGTAGATCCTAGACTAGAGCCCTGGAAGCATCCAGGAAGTCAACCTAAGACTGCTTGTACCACTTGCTATTGTAAAAAGTGTTGCTTTCATTGCCAAGTTTGTTTCATAACAAAAGGCTTAGGCATCTCCTATGGCAGGAAGAAGCGGAGACAGCGACGAAGAGCTCCTCAAGACAGTGAGACTCATCAAGTTTCTCTATCAAAGCAGTAAGTAGTACATGTAATGCAATCCTTATATATATTAGCAATAGTAGCATTAGTAGTAGCAATAATAATAGCAATAGTTGTGTGGTCTATAGTATTCATAGAATATAGGAAAATATTAAGACAAAGAAAAATAGACAGGTTAATTGATAGAATAAGAGAAAGAGCAGAAGACAGTGGCAATGAGAGTGAAGGGGATCAGGAGGAATTGTCAGCACTTGTGGAGATGGGGCACCATGCTCCTTGGGATGTTAATGATCTGTAGTGCTGCAGAACACTTGTGGGTCACAGTCTATTATGGGGTACCTGTGTGGAGAGAGGCAACCACCACTCTATTCTGTGCATCAGATGCTAGAGCATATGATACAGAGGTACATAATGTTTGGGCCACGCATGCCTGTGTACCCACAGACCCCAACCCACAAGCAGTAGCATTAGCAAATGTGACAGAAAATTTTAATATGTGGAAAAATAACATGGTAGAACAAATGCATGAAGATATAATCAGTTTATGGGATCAAAGCCTAAAGCCATGTGTAAAGTTAACTCCACTCTGTGTTACTTTACACTGTAGTGATGTCAATATCACTAGTAATGCCACTACCACTAATGACACCAGCACCCCGGAAGAGTCAGGGGCAATACAAAACTGTTCTTTCAATATGACCACAGAAGTAAAAGACAAGAAGCTGAGAGTAAATGCACTCTTTTATAAACTTGATGTAGTACCAATAGATAATGATAGAACTAATAATACCAGCTATAGGTTGGTAAGTTGTAATACCTCAGTCATTACACAGGCCTGTCCAAAAGTATCCTTTGAGCCAATTCCCATACATTATTGTGCCCCGGCTGGTTTTGCGATTCTAAAGTGTAGAGATAAGAAGTTCAATGGAACAGGACCATGTAAAGGTGTCAGCACAGTACAATGCACACATGGAATTAGGCCAGTAGTATCAACTCAACTGCTGTTAAATGGCAGTCTAGCAGAAGAAGAGGTAGTAATTAGATCTGAAAATTTCACAAACAATGCTAAAACCATAATAGTACAGCTAAACGAAGCTATAGCTATTAATTGTACAAGACCCAGCAACAGTACAGGACAAAGTATACGTATAGGACAAAGGAGAGCATTTTATGCAACAGGGAAAATAATAGGTGATATAAGACATGCACATTGTAACATTAGTGGAGCAAAATGGGATAACACCTTACAACAGATAGTTAATTTCTTAAAAGAACAATTTGGGAATTATAAAACAATAGTCTTTAATCAATCCTCAGGAGGCGACCCAGAAATTGTAACACACAGTTTTAATTGTGGAGGGGAATTTTTCTACTGTAATTCAACACAACTGTTTAATAGTACTTGGAATATTAATAGTACTTGGAATGATACTGGAGAGTCAAATAACACTGTAGGCAATGTCACACTCACACTCCCATGCAGAATAAAACAAATTGTAAACCTGTGGCAGGAAGTAGGAAAAGCAATGTATGCCCCTCCCATCAGCGGACTAATTAGATGTTCATCAAATATTACAGGGCTGCTATTAACAAGAGATGGGGGTAAGGGTAATGACACGGTCGAGACCTTCAGACCTGGAGGAGGAGATATGAGGGACAATTGGAGAAGTGAATTATATAAATATAAAGTAGTAAAAATTGAACCATTAGGAGTAGCACCCACTAAGGCTAAGAGAAGAGTGGTGCAGAGAGAAAAAAGAGCAGTGGGAATAGGAGCTGTGTTGTTCCTTGGGTTCTTGGGAGCAGCAGGAAGCACTATGGGCGCAGCGTCAATAACGCTGACGGTACAGGCCAGACAATTATTGTCTGGTATAGTGCAACAGCAGAACAATTTGCTGAGGGCTACTGAGGCGCAACAGCATCTGTTGCAACTCACAGTCTGGGGCATCAAGCAGCTCCAGGCAAGAGTCCTGGCTCTGGAAAGATACCTAAGGGATCAACAGCTCCTGGGGATTTGGGGTTGCTCTGGAAAACTCATTTGCACCACCACTGTGCCTTGGAATGCTAGTTGGAGTAATAAATCTCTGGATCAGATTTGGAATAACATGACCTGGATGCAGTGGGAAAGAGAAATTAACAATTACACAAGCTTAATATACACCTTGATTGAAGAATCGCAAAACCAACAAGAAAAGAATGAACAAGAATTATTGGAATTAGATAAATGGGCAAATTTGTGGAATTGGTTTGACATAACAAAATGGCTGTGGTATATAAAAATATTCATAATGATAGTAGGAGGCTTGGTAGGTTTAAGAATAGTTTTTACTGTACTTTCTATAGTGAATAGAGTTAGGCAGGGATACTCACCATTATCGTTTCAGACCCACCTCCCAGCACCGAGGGGACCCGACAGGCCCGAAGGAACCGAAGAAGAAGGTGGAGAGAGAGACAGAGACAGATCCGGTCGATTAGTGACCGGATTCTTAGCACTTATCTGGGTCGACCTGCGGAGCCTGTGCCTCTTCAGCTACCACCGCTTGAGAGACTTACTCTCGATTGTAACGAGGATTGTGGAACTTCTGGGACACAGGGGTTGGGAAGTCCTCAAATATTGGTGGAATCTCCTACAGTATTGGAGTCAGGAGCTAAAGAATAGTGCTGTTAACTTGTTCAATGCTATAGCCATAGCAGTAGCTGAGGGGACAGATAGGGTTATAGAAGTATTACAAAGAGCTTATAGAGCTATTCTCCACATACCTAGAAGAATAAGACAGGGCTTGGAAAGGGCTTTGCTATAAGATGGGTGGCAAGTGGTCAAAATGCGCTGGATGGCCTACTGTAAGGGAAAGAATGAGACGAGCTGCGCCAGGGGAAAGAAGGAGACGAGCTGAGCCAGCAGCAGATGGGGTAGGAGCAGCATCTCGAGACCTGGAAAGACATGGAGCACTCACAAGTAGCAATACAGCAGCTAACAATGCTGATTGTGCCTGGCTAGAAGCACAAGAGGAGGAGGGGGAAGTGGGTTTTCCAGTCAGACCTCAGGTACCTTTAAGACCAATGACTTACAAGGCAGCTGTAGATCTTAGCCACTTTTTAAAAGAAAAGGGGGGACTGGAAGGGCTAATTTACTCTCAAGAAAGACAAGATATCCTTGATCTGTGGGTCTACGACACACAAGGCTACTTCCCTGATTGGCAGAACTACACACCAGGGCCAGGGACTAGATGGCCACTGACCTTTGGATGGTGCTTCAAGCTAGTACCAGTTGAGCCAGAGAAGATAGAAGAGGCCAATGCAGGAGAGAACAACTGCTTGTTACACCCTATGAGCCAGCATGGAATGGATGACCCGGAGAGAGAAGGGTTAGAGTGGAGGTTTGACAGCCGCCTAGCATTTCATCACGTGGCCCGAGAGCTGCATCCGGAGTACTACAAGAACTGATGACCTCGAGCTTTCTACAAGGGACTTTCCGCTGGGGACTTTCCAGGGAAGGCGTGGCCTGGGCGGGACTGGGGAGTGGCGAGCCCTCAGATGCTGCATATAAGCAGCTGCTTTTGCCTGTACTGGGTCTCTCTGGTTAGACCAGATCTGAGCCTGGGAGCTCTCTGGCTAGCTAGGGAACCACTGCTTAAGCCTCAATAAAGCTTGCCTTGAGTGCTTTAAGTAGTGTGTGCCCGTCTGTTGTGTGACTCTGGTAACTAGAGATCCCTCAGACCCTTTTAGTCAGTGTGGAAAATCTCTAGCA
>B.US.89.P896_U39362_F2.CM.95.MP257_AJ249237
TGGAAGGGCTAGTTCACTCCCAGAAAAGACAAGATATCCTTGATCTGTGGGTCTACCACACACAAGGCTTCTTCCCAGATTGGCAGAACTACACACCAGGGCCAGGAATCAGATATCCACTGACCTTTGGATGGTGCTACAAGCTAGTACCAGTTGAGCCAGATGAAGGAGAGAACAACAGAGAGGACAACAGCTTGCTACACCCTGCTAACCAGCATGGAGTAGAAGACTCGGAGAGACAAGTGTTAGTGTGGAGGTTTGACAGCCGCCTAGCATTCCATCACGTGGCCCGAGAGCTGCATCCGGAGTACTTCAAGAACTGAACTGCTGACACTGAGCTATCTACAAGGGACTTTCCGCTGGGGACTTTCCAGGGAGGTGTGGCCTGGGCCGAACTGGGGAGTGGCGAGCCCTCAGATGCTGCATATAAGCAGCTGCTTTTTGCCTGTACTGGGTCTCTCTGGTTAGACCAGATCTGAGCCTGGGAGCTCTCTGGCTAGCTAGGGAACCCACTGCTTAAGCCTCAATAAAGCTTGCCTTGAGTGCTTCAAGTAGTGTGTGCCCGTCTGTTGTGTGACTCTGGTAGCTAGAGATCCCTCAGACCATCCTAGTTAGTGTAGAAAATCTCTAGCAGTGGCGCCCGAACAGGGACCGGAAAGCGAAAGAGAAACCAGAGGAGATCTCTCGACGCAGGACTCGGCTTGCTGAAGCGCGCACAGCAAGAGGCGAGGGGCGGCGACTGGTGAGTACGCCAAATTTTTTGACTAGCGGAGGCTAGAAGGAGAGAGATGGGTGCGAGAGCGTCAGTATTAAGCGGGGGAGAATTAGATAGATGGGAGAAAATTCGGTTAAGGCCAGGGGGAAAGAAAAAATATAAACTAAAACATATAGTATGGGCAAGCAGGGAGCTAGAACGATTCGCAGTTAACCCTAGCCTGTTAGAAACATCAGAGGGCTGTAGACAAATACTGGGACAGCTACAATCATCCCTTCAGACAGGATCAGAAGAACTTAAATCATTATATAATACAGTAGCAACCCTCTATTGTGTGCATCAAAGGATAGAGGTAAAAGACACCAAGGAAGCTTTAGATAAGATAGAGGAAGAGCAAAACAAAAGTAAGAAAAAGGCACAGCAAGCAGCAGCTGACACAGGAAATAGCAGCCAGGTCAGCCAAAATTACCCTATAGTGCAGAACATCCAGGGGCAAATGGTACATCAGGCCATCTCACCTAGAACTTTAAATGCATGGGTAAAAGTAGTAGAAGAGAAGGCTTTCAGCCCAGAAGTAATACCCATGTTTTCAGCATTATCAGAAGGAGCCACCCCACAAGATTTAAACACCATGCTAAACACAGTGGGGGGACATCAGGCAGCCATGCAAATGTTAAAAGAGACCATCAATGAGGAAGCTGCAGAATGGGATAGATTGCATCCAGTGCAGGCAGGGCCTGTTGCACCAGGCCAGATGAGAGAACCAAGGGGAAGTGACATAGCAGGAACTACTAGTACCCTTCAGGAACAAATAGGATGGATGACAAATAATCCACCTATCCCAGTAGGAGAAATCTATAAAAGATGGATAATCCTGGGATTAAATAAAATAGTAAGAATGTATAGCCCTTCCAGCATTTTGGACATAAAACAAGGACCAAAGGAACCCTTTAGAGACTATGTAGACCGGTTCTATAAAACTCTAAGAGCCGAGCAAGCTTCACAGGAGGTAAAAAATTGGATGACAGAAACCTTGTTGGTCCAAAATGCAAACCCAGATTGTAAAACTATATTAAAAGCATTGGGACCAGGAGCTACACTAGAAGAAATGATGACAGCATGTCAGGGAGTGGGAGGACCCGGACATAAAGCAAGAGTCTTGGCTGAGGCAATGAGCAAAGCAACAGGTGCAGCCATAATGATGCAGAAGAGCAACTTTAAGGGCCAAAGAAGAATTGTTAAGTGTTTTAACTGTGGCAAAGAAGGACATATAGCTAGAAATTGCAGGGCCCCTAGAAAAAGGGGCTGCTGGAAATGTGGACAGGAAGGACACCAAATGAAAGACTGCACTGAGAGACAGGCTAATTTTTTAGGGAAAATGTGGCCTTCCAACAAGGGGAGGCCCGGAAATTTTCTTCAGAACAGACCAGAGCCAACAGCCCCACCAGAAGAGAGCTTCAGGTTTGGGGAGGAGACAACAACTCCCTCTCAGAAGCAGGAGCCGATAGACAAGGAACTGTATCCCTTAGCTTCCCTCAGATCACTCTTTGGCAACGACCCCTCGTCACAATAAAAGTAGGGGGGCAACTAAAGGAAGCTCTATTAGATACAGGAGCAGATGATACAGTATTAGAAGACATGAGTTTGCCAGGAAGATGGAAACCAAAAATGATAGGGGGAATTGGAGGTTTTATCAAAGTAAGACAGTATGAGCAGATAGACATAGAAATCTGTGGACATAAAGCTAAAGGTACAGTATTAGTAGGACCTACACCTGTCAACATAATTGGAAGAAATCTGTTGACTCAGATTGGTTGCACTTTAAATTTTCCCATTAGTCCTATTGAAACTGTACCAGTAAAATTAAAGCCAGGAATGGATGGTCCAAAAGTGAAACAATGGCCATTGACAGAAGAAAAAATAAAAGCATTAGTAGAAATTTGTACAGAAATGGAAAAGGAAGGAAAAATTTCAAAAATTGGGCCTGAGAATCCATACAATACTCCAGTATTTGCCATAAAGAAAAAAGACAGTACTAAATGGAGAAAATTAGTAGATTTCAGAGAACTTAATAAGAGAACCCAAGACTTCTGGGAAGTTCAATTAGGCATACCACATCCCGCAGGGTTAAAAAAGAAAAAATCAGTAACAGTACTGGATGTGGGTGATGCATATTTTTCAGTTCCCTTAGATGAAGACTTCAGGAAGTACACTGCATTTACCATACCTAGTATAAACAATGAGACACCAGGGATTAGATATCAATACAATGTGCTTCCACAGGGATGGAAAGGATCACCAGCAATATTCCAAAGTAGCATGACAAAAATCTTAGAGCCTTTTAGAAAACAAAATCCAGACATAGTTATCTATCAATACATGGATGACTTGTATGTAGGATCTGACTTAGAAATAGGGCAGCATAGAGCAAAAATAGAGGATCTGAGACAACATCTGTTGAAGTGGGGGTTTACCACACCAGACAAAAAACATCAGAAAGAACCTCCATTTCTTTGGATGGGTTATGAACTCCATCCTGATAAATGGACAGTACAGCCTATAGTGCTGCCAGAAAAAGACAGCTGGACTGTCAATGATATACAGAAGTTAGTGGGGAAATTGAATTGGGCAAGTCAGATTTATGCAGGGATTAAAGTAAAGCAATTATGTAAACTCCTTAGGGGAACCAAAGCACTAACAGAAGTAGTACCACTAACAGAAGAAGCAGAGCTAGAACTGGCAGAAAACAGGGAGATTCTAAAAGAACCAGTACATGGAGTGTATTATGACCCAACAAAAGACTTAATAGCAGAGCTACAGAAGCAGGGGCAGGGCCAATGGACATATCAAATTTATCAGGAGCCATATAAAAATCTGAAAACAGGAAAATATGCAAGAATGAGGGGTGCCCACACTAATGATGTAAAACAATTAACAGAGGCAGTGCAAAAAATAGCCACAGAAAGCATAGTAATATGGGGAAAGACTCCTAAATTTAAACTACCCATTCAAAAGGAAACATGGGAAGCATGGTGGACAGATTATTGGCAAGCCACCTGGATTCCTGAGTGGGAGTTTGTCAATACCCCTCCCTTAGTGAAATTATGGTATCAGTTAGAGAAAGAACCCATAGTAGGAGCAGAAACTTTCTATGTAGATGGAGCAGCTAACAGGGACACCAAATCAGGAAAAGCAGGATATGTTACTGACAGAGGAAGACAAAAAGTTGTCTCCCTAGCTGACACAACAAATCAGAAGACTGAGCTACAAGCAATTCATCTAGCTTTGCAGGATTCGGGATTAGAAGTAAACATAGTGACAGACTCACAATATGCATTAGGGATCATTCAAGCACAGCCAGATAAAAGTGAATCAGAGTTAGTCAGTCAAATAATAGAGCAGTTAATAAAAAAGGAAAAGGTCTACCTGGCATGGGTACCAGCACACAAAGGAATTGGAGGAAATGAACAAGTAGATAAATTAGTCAGTGCTGGAATCAGGAAAGTACTATTTTTAGATGGAATAGATAAGGCCCAAGAAGAACATGAGAAATATCACACTAATTGGAGAGCAATGGCTAGTGATTTTAACCTGCCACCTGTAGTAGCAAAAGAAATAGTAGCCAGCTGTAATAAATGTCAGCTAAAAGGAGAAGCCATGCATGGACAAGTAGACTGTAGTCCAGGAATATGGCAACTAGATTGCACACATTTAGAAGGAAAAGTTATCCTGGTAGCAGTTCATGTAGCCAGTGGATATATAGAAGCAGAAGTTATTCCAGCAGAGACAGGGCAGGAAACAGCATACTTTCTCCTAAAATTAGCAGGCAGATGGCCAGTAAAAACAATACATACAGACAATGGCAGCAATTTCACCAGTACCACAGTTAAGGCCGCCTGTTGGTGGGCAGGGATCAAGCAGGAATTTGGCATTCCCTACAATCCCCAAAGTCAAGGAGTAGTAGAATCTATGAATAAAGAATTAAAGAAAATTATAGGACAGGTAAGAGATCAGGCTGAACATCTTAAGACAGCAGTACAAATGGCAGTATTCATCCACAATTTTAAAAGAAAAGGGGGGATTGGGGGGTACAGTGCAGGGGAAAGAATAGTAGACATAATAGCATCAGACATACAAACTAAAGAACTACAAAAACAAATTACAAAAATTCAAAATTTTCGGGTTTATTACAGGGACAGCAGAGATCCACTTTGGAAAGGACCAGCAAAGCTTCTCTGGAAAGGTGAAGGGGCAGTAGTAATACAGGATAATAGTGACATAAAAGTAGTGCCAAGAAGAAAAGCAAAGATCATTAGGGATTATGGAAAACAGATGGCAGGTGATGATTGTGTGGCAAGTAGACAGGATGAGGATTAGAACATGGAAAAGTTTAGTAAAACACCATATGTATATTTCAGGGAAAGCTAAGGGATGGTCTTATAGACATCACTATGAAAGCACTAATCCAAGAATAAGTTCAGAAGTACACATCCCACTAGGGGATGCTAAATTGGTAGTAACAACATATTGGGGTCTGCATACAGGAGAAAGAGACTGGCATTTGGGTCAGGGAGTCTCCATAGAATGGAGGAAAAAGAGATATAGCACACAAGTAGACCCTGGCCTAGCAGACCGACTAATTCATCTGTATTACTTTGATTGTTTTTCAGACTCTGCTATAAGAAAGTCCATATTAGGACATATAGTTAGCCCTAGTTGTGAATATCAAGCAGGACATAACAAGGTAGGATCTCTACAGTACTTGGCACTAGCAGCATTAACAACACCAAGAAGGATAAAGCCACCCTTTCCTAGTGTTACGAAACTGACAGAGGATAGATGGAACAAGCCCCAGAAGACCAAGGGCCACAGAGGGAGCCATACAATGACTGGACACTAGAGCTTTTAGAGGAGCTTAAGAATGAAGCTGTGAGACATTTCCCTAGGATATGGCTCCATAGTTTAGGGCAACATATCTATGAAACTTATGGGGATACTTGGACAGGAGTGGAAGCCTTAATAAGAATTCTGCAACAACTGCTGTTTATTCATTTCAGAATTGGGTGTCGACATAGCAGAATAGGCATTATTCAACAGAGGAGAACAAGAAATGGAGCCAGTAAATCCTAGCCTAGAGCCCTGGAAGCATCCAGGAAGTCAGCCTAAAACTGCTTGTACCAATTGCTATTGCAAAAAATGTTGCTTTCATTGCCAAGCTTGTTTCATAACAAAAGGCTTAGGCATCTCCTATGGCAGGAAGAAGCGGAGACAGCGACGAAGACCTCCTCAAGACAGTCAGACTCATCAAGTTTCTCTATCAAAGCAGTAAGTAGTACATGTAATGCTTTCTTTACAAATATTAGCAATAGTAGCATTAGTAGTAGCAGCAATAATAGCAATAGTTGTGTGGTCTATAGTATTCATAGAATATAGGAAAATATTAAGACAAAGAAAAATAGACAGATTAATTGATAGAATAAGAGAAAGAGAAGAAGACAGTGGCAATGAGAGTGAAGGAGATCAGGAAGAATTGGCAGCACTTGAGAGGGGGCATCTTGCTCCTTGGGATGTTGATGATCTGTAGTGCTGCAAAAGAAAAAACGTGGGTCACAATCTATTATGGGGTACCTGTGTGGAGAGAAGCAACCACCACTCTATTTTGTGCATCAGATGCTAAAGCCTATGATACAGAGGTACATAATGTTTGGGCCACACATGCCTGTGTACCCACAGACCCCAACCCACAAGAAGTAGTATTGGGAAATGTGACAGAAAATTTTAACATGTGGAAAAATAACATGGTAGATCAGATGCATGAGGATATAATCAGTTTATGGGATGAAAGCCTAAAGCCATGTGTAAAATTAACCCCACTCTGTGTTACTTTAAATTGCACTAATTTGAATATCACTAAGAATACTACTAATCCCACTAGTAGCAGCTGGGGAATGATGGAGAAAGGAGAAATAAAAAATTGCTCTTTCTATATCACCACAAGCATAAGAAATAAGGTAAAGAAAGAATATGCACTTTTTAATAGACTTGATGTAGTACCAATAGAAAATACTAATAATACTAAGTATAGGTTAATAAGTTGTAACACCTCAGTCATTACACAGGCCTGTCCAAAGGTATCCTTTCAGCCAATTCCCATACATTATTGTGTCCCGGCTGGGTTTGCGATGCTAAAGTGTAACAATAAGACATTCAATGGATCAGGACCATGCACAAATGTCAGCACAGTACAATGTACACATGGAATTAGGCCAGTGGTGTCAACTCAACTGCTGTTAAATGGCAGTCTAGCAGAAGAAGACATAGTAATTAGATCTGAAAATTTCACAGACAATGCTAAAACCATAATAGTACAGCTAAATGAATCTGTAGTAATTAATTGTACAAGACCCAACAACAATACAAGAAGAAGGTTATCTATAGGACCAGGGAGAGCATTTTATGCAAGAAGAAACATAATAGGAGATATAAGACAAGCACATTGTAACATTAGTAGAGCAAAATGGAATAACACTTTACAACAGATAGTTATAAAATTAAGAGAAAAATTTAGGAATAAAACAATAGCCTTTAATCAATCCTCAGGAGGGGACCCAGAAATTGTAATGCACAGTTTTAATTGTGGAGGGGAATTTTTCTACTGTAATACAGCACAACTGTTTAATAGTACTTGGAATGTTACTGGAGGGACAAATGGCACTGAAGGAAATGACATAATCACACTCCAATGCAGAATAAAACAAATTATAAATATGTGGCAGAAAGTAGGAAAAGCAATGTATGCCCCTCCCATCACAGGACAAATTAGATGTTCATCAAATATTACAGGGCTGCTACTAACAAGAGATGGAGGTAATAGTACTGAGACTGAGACTGAGATCTTCAGACCTGGAGGAGGAGATATGAGGGACAATTGGAGAAGTGAATTATATAAATATAAAGTAGTAAGAATTGAACCAATAGGAGTAGCACCCACCAGGGCAAAGAGAAGAACAGTGCAAAGAGAAAAAAGAGCAGTGGGAATAGGAGCTGTGTTCCTTGGGTTCTTGGGAGCAGCAGGAAGCACTATGGGCGCAGCGTCAGTGACGCTGACGGTACAGGCCAGGCTATTATTGTCTGGTATAGTGCAGCAGCAGAACAATCTGCTGAGGGCTATTGAGGCGCAACAGCATATGTTGCAACTCACAGTCTGGGGCATCAAGCAGCTCCAGGCAAGAGTCCTGGCTCTGGAAAGATACCTAAGGGATCAACAGCTCATGGGAATTTGGGGTTGCTCTGGAAAACTCATTTGCACCACTTCTGTGCCTTGGAATGTTAGTTGGAGTAATAAATCTGTGGATGATATTTGGAATAACATGACCTGGATGGAGTGGGAAAGAGAAATTGACAATTACACAGACTATATATATGACTTACTTGAAAAATCGCAAACCCAACAAGAAAAGAATGAAAAAGAATTATTGGAATTGGATAAATGGGCAAGTTTGTGGAATTGGTTTGACATAACAAACTGGCTGTGGTATATAAGATTATTCATAATGATAGTAGGAGGCTTGATAGGTTTAAGAATAGTTTTTGCTGTACTTTCTATAGTAAATAGAGTTAGGCAGGGATATTCACCATTATCGTTTCAGACCCTCCTCCCAGCCTCGAGGGGACCCGACAGGCCCGAAGGAACAGAAGAAGAAGGTGGAGAGAGAGACAGAGACAGATCCGGTCCATTAGTGAACGGATTCTTGGCACTTTTCTGGGTCGATTTGAGGAACCTGTGCCTCTTCCTCTACCACCTCTTGAGAAACTTACTCTTGATTGTAACGAGGATTGTGGAACTTCTGGGACGCAGGGGGTGGGAAGCCCTCAAATATTGGTGGAATCTCCTGCAATATTGGAGCCAGGAACTAAAGAATAGTGCTGTTAGCTTGCTCAACGCCACAGCCATAGCAGTAGCTGAGGGGACAGATAGGGTTATAAAAATAGTACAAAGAGCTTGTAGAGCTATTCGCAACATACCTACAAGAATCAGACAGGGCTTGGAAAGGGCTTTGCTATAAGATGGGAGGCAAGTGGTCAAAACGTAGGGCAGAGGGATGGCAGACTATAAGGGAAAGAATGAGACGAGCTGAACCAGCTGAACCAGCAGCAGATGGGGTGGGAGCAGTATCTCGAGACCTGGCGAGACATGGAGCTATCACAAGTAGCAATACTAACAATGCTGATATTGCCTGGCTGGAAGCACAAGAGGAGGGAGAAGTGGGTTTTCCAGTCAGACCTCAGGTACCTTTAAGACCAATGACTTACAAGGCAGCTGTAGATCTTAGCCACTTTTTAAAAGAAAAGGGGGGACTGGAAGGGCTAGTTCACTCCCAGAAAAGACAAGATATCCTTGATCTGTGGGTCTACCACACACAAGGCTTCTTCCCAGATTGGCAGAACTACACACCAGGGCCAGGAATCAGATATCCACTGACCTTTGGATGGTGCTACAAGCTAGTACCAGTTGAGCCAGATGAAGGAGAGAACAACAGAGAGGACAACAGCTTGCTACACCCTGCTAACCAGCATGGAGTAGAAGACTCGGAGAGACAAGTGTTAGTGTGGAGGTTTGACAGCCGCCTAGCATTCCATCACGTGGCCCGAGAGCTGCATCCGGAGTACTTCAAGAACTGAACTGCTGACACTGAGCTATCTACAAGGGACTTTCCGCTGGGGACTTTCCAGGGAGGTGTGGCCTGGGCCGAACTGGGGAGTGGCGAGCCCTCAGATGCTGCATATAAGCAGCTGCTTTTTGCCTGTACTGGGTCTCTCTGGTTAGACCAGATCTGAGCCTGGGAGCTCTCTGGCTAGCTAGGGAACCCACTGCTTAAGCCTCAATAAAGCTTGCCTTGAGTGCTTCAAGTAGTGTGTGCCCGTCTGTTGTGTGACTCTGGTAGCTAGAGATCCCTCAGACCATCCTAGTTAGTGTAGAAAATCTCTAGCAGGG
>B.ES.89.S61K15_AF256210_G.CM.96.96CMABB55_AY772535
TGGAAGGGCTAATTTGGTCCCAGAAAAGACAAGATATCCTTGATCTGTGGGTCCACCACACACAAGGCTACTTCCCTGATTGGCAGAACTACACACCAGGGCCAGGGATCAGATATCCACTGACCTTTGGATGATGTTTCAAGCTAGTACCAGTGGAGCCAGAGAAGGTAGAAGAGGCCAATGAAGGAGAGAACAACAGCTTGTTACACCCTGTGAGCCTGCATGGGATGGAGGACCCGGAGAAAGAAGTGTTAGTATGGAGGTTTGACAGCCGCCTAGCACTCCGTCACATGGCCCGAGAGCTGCATCCGGAGTACTACAAGGACTGCTGACACCGAGCTTTCTACAAGGGACTTTCCGCTGGGGACTTTCCAGGGAGGCGTGGCCTGGGCGGGACTGGGGAGTGGCGAGCCCTCAGATGCTGCATATAAGCAGCCGCTTTTGCCTGTACTGGGTCTCTCTTGTTAGACCAGATCTGAGCCTGGGAGCTCTCTGGCTAACTAGGGAACCCACTGCTTAAGCCTCAATAAAGCTTGCCTTGAGTGCTTCAAGTAGTGTGTGCCCGTCTGTTGTGTGACTCTGGTAACTAGAGATCCCTCAGACCCTTTTAGTCAGTGTGAAAAATCTCTAGCAGTGGCGCCCGAACAGGGACTTGAAAGCGAAAGGGAAACCAGAGAAGCTCTCTCGACGCAGGACTCGGCTTGCTGAAGCGCGCACGGCAAGAGGCGAGGGGACGGCGACTGGTGAGTACGCCAAAATTTTGACTAGCGGAGGCTAGAAGGAGAGAGATGGGTGCGAGAGCGTCGGTATTAAGCGGGGGAGGATTAGATAAATGGGAAAAAATTCGGTTAAGGCCAGGGGGAAAGAAAAAATATAGATTAAAACATTTAGTATGGGCAAGCAGGGAGCTAGAACGATTCGCAGTCAATCCTGGCCTATTAGAAACATCAGAAGGATGTAGACAAATACTGGGACAGCTACAACCATCCCTTCAGACAGGATCAGAAGAACTTAGATCATTATATAATACAGTAGCAACCCTCTATTGTGTGCATCAAAAGATAGATGTAAAAGACACCAAGGAAGCTTTAGATAAGATAGAGGAAGAGCAAAACAAAAGTAAGAAAAAAGCACAGCAAGCAGCAGCTGACACAGGAAACAGCAGCCAGGTCAGCCAAAATTACCCTATAGTGCAGAACATCCAGGGGCAAATGGTACATCAGGCCATATCACCTAGAACTTTAAATGCATGGGTAAAAGTAGTAGAAGAAAAGGCTTTCAGCCCAGAAGTAATACCCATGTTTTCAGCATTATCAGAAGGAGCCACCCCACAAGATTTAAACACCATGCTAAACACAGTGGGGGGACATCAAGCAGCCATGCAAATGTTAAAAGAGACCATCAATGAGGAAGCTGCAGAATGGGATAGATTGCATCCAGTGCATGCAGGGCCTCATCCACCAGGGCAGATGAGAGAACCAAGGGGAAGTGACATAGCAGGAACTACTAGTACCCTTCAGGAACAAATAGCATGGATGACAAATAATCCACCTATCCCAGTAGGAGAAATCTATAAGAGATGGATAATCCTGGGGTTAAATAAAATAGTAAGAATGTATAGCCCTACCAGCATTCTGGACATAAAACAAGGACCAAAGGAACCCTTTAGAGACTATGTAGACCGGTTCTATAAGACTCTAAGAGCCGAGCAAGCTTCACAGGAGGTAAAAAATTGGATGACAGAAACCTTGTTGGTCCAAAATGCGAACCCAGATTGTAAGACTATTTTAAAAGCATTGGGACCAGCAGCTACACTAGAAGAAATGATGACAGCATGTCAGGGAGTGGGAGGACCCGGCCATAAAGCAAGAGTCTTGGCAGAAGCAATGAGCCAAGTAACAAATTCAGCTACCATAATGATGCAGAAAGGCAATTTTAGGAACCAAAGAAAGATTGTTAAGTGTCTCAATTGTGGCAAAGAAGGGCACATAGCCAAAAATTGCAGGGCCCCTAGGAAAAGGGGCTGTTGGAAATGTGGAAAGGAGGGACACCAAATGAAAGATTGTACTGAGAGACAGGCTAATTTTTTAGGGAAAATCTGGCCTTCCCACAGGGGAAGGCCAGGGAATTTTCCTCAGAACAGGCTAGAGCCAACAGCCCCACCAGCCCCACCAGAAGAGATCTTCAGGTTTGGGGAAGAGACAACAACTCCCTCTCAGAAGCAGGAGATGATAGACAAGGAACTGTATCCTTCAGCTTCCCTCAAATCACTCTTTGGCAACGACCCCTTGTCACAATAAAGATAGGGGGGCAACTAAAGGAAGCTCTATTAGATACAGGAGCAGATGATACAGTATTAGAAGAAATAAATTTGCCAGGAAGATGGAAACCAAAAATGATAGGGGGAATTGGAGGTTTTATCAAAGTAAGACAGTATGATCAAATACTCGTAGAAATCTGTGGACATAAAGCTATAGGTACAGTATTAGTAGGACCTACACCTGTCAACATAATTGGAAGAAATCTGTTGACTCAGATTGGTTGCACTTTAAATTTTCCCATTAGTCCTATTGAAACTGTACCAGTAAAATTAAAGCCAGGAATGGATGGCCCAAAAGTTAAACAATGGCCATTGACAGAAGAAAAAATAAAAGCATTAGTAGAAATCTGTACAGGAATGGAAAAGGAAGGGAAAATTTCAAAAATTGGGCCTGAAAATCCATATAATACTCCAGTATTTGCCATAAAGAAAAAAGACAGTACTAAATGGAGAAAATTAGTAGATTTCAGAGAACTTAATAAGAAAACTCAAGACTTCTGGGAAGTTCAATTAGGAATACCACATCCCGCAGGGTTAAAAAAGAAAAAATCAGTAACAGTACTGGATGTGGGTGATGCATATTTTTCAGTTCCCTTAGATAAAGAATTCAGGAAGTACACTGCATTTACCATACCTAGTATAAACAATGAGACACCAGGGATTAGATATCAGTACAATGTGCTTCCACAGGGATGGAAAGGATCACCAGCAATATTCCAAAGCAGCATGACAAAAATCTTGGAGCCTTTTAGAAAACAAAATCCAGACATAGTTATCTATCAATACATGGATGATTTGTATGTAGGATCTGACTTAAAAATAGGGCAGCATAGAGCAAAGATAGAGGAATTAAGAAAACATCTATTGAGCTGGGGATTTACCACACCAGATAAAAAACATCAGAAAGAACCTCCATTCCTTTGGATGGGATATGAGCTCCATCCTGACAAATGGACGGTACAACCTATACAGTTGCCAGAAAAGGAAAGCTGGACTGTCAATGATATACAAAAGTTAGTGGGAAAATTAAATTGGGCAAGTCAGATTTATCCAGGAATTAAAGTAAAGCAACTATGTAGACTCCTTAGGGGAACCAAGGCACTAACAGAAGTAATACCACTAACAAAAGAAGCAGAGCTAGAACTGGCAGAAAACAGGGAAATTCTAAAAGAACCAGTACATGGAGTGTATTATGACCCATCAAAAGACTTAATAGCGGAAATACAGAAGCAGGGGCAAGGTCAATGGACATATCAAATTTATCAAGAGCCATTTAAAAATCTGAAAACAGGAAAATATGCAAGAATGAGGGGTGCCCACACTAATGATGTAAAACAATTAACAGAGGCAGTGCAAAAAATAACCACAGAAAGCATAGTAATATGGGGAAAGACTCCTAAATTTAAACTACCCATACAAAAAGAAACATGGGAAACATGGTGGACAGAGTATTGGCAAGCCACCTGGATTCCTGAGTGGGAGTTTGTCAATACCCCTCCCTTAGTAAAATTATGGTACCAGTTAGAGCAAGAACCCATAACAGGAGTAGAAACTTTCTATGTAGATGGGGCAGCTAACAGGGAGACTAAATTAGGAAAAGCAGGATATGTTACTAACAAAGGGAGACAAAAAGTTGTCTCCATAACTGACACAACAAATCAGAAGACTGAGTTACAAGCAATTCTTCTAGCTTTACAGGATTCGGGATTAGAAGTAAACATAGTAACAGACTCACAATATGCATTAGGAATCATTCAAGCACAACCAGATAAAAGTGAATCAGAGATAGTCAGTCAAATAATAGAGCAGTTAATAAAAAAGGAAAAGGTCTACCTGGCATGGGTACCAGCGCACAAAGGAATTGGAGGAAATGAACAAGTAGATAAATTAGTCAGTACTGGAATCAGGAAAGTGCTATTTTTAGATGGAATAGATAAAGCCCAAGAAGAACATGAAAAATATCACAGTAATTGGAGGGCAATGGCTAGTGATTTTAACCTGCCACCTGTGGTAGCAAAAGAGATAGTAGCCAGCTGTGATAAATGTCAGCTAAAAGGAGAAGCCATGCATGGACAAGTAGACTGTAGTCCAGGAATATGGCAACTAGATTGTACACATTTAGAAGGAAAAGTTATCCTGGTAGCAGTTCATGTAGCCAGTGGATATATAGAAGCAGAAGTTATTCCAGCAGAGACAGGGCAGGAAACAGCATACTTTCTCTTAAAATTAGCAGGAAGATGGCCAGTAAAAACAATACATACAGACAATGGCAGCAATTTCACCAGTACTACGGTTAAGGCCGCCTGTTGGTGGGCGGGAATCAAGCAGGAATTTGGCATTCCCTACAATCCCCAAAGTCAAGGAGTAGTAGAATCTATAAATAAAGAATTAAAGAAAATTATAGGACAGATAAGAGATCAGGCTGAACATCTTAAGACAGCAGTACAAATGGCAGTATTCATCCACAATTTTAAAAGAAAAGGGGGGATTGGGGGGTACAGTGCAGGGGAAAGAATAGTAGACATAATAGCAACAGACATACAAACTAAAGAACTACAAAAACAAATTACAAAAATTCAAAATTTTCGGGTTTATTACAGGGACAGCAGAGATCCACTTTGGAAAGGACCAGCAAAGCTTCTCTGGAAAGGTGAAGGGGCAGTAGTAATACAAGATAATAGTGAAATAAAAGTAGTACCAAGAAGAAAAGCAAAGATCATTAGGGATTATGGAAAACAGATGGCAGGTGATGATTGTGTGGCAAGTAGACAGGATGAGGATTAGAACATGGAAAAGTTTAGTAAAACACCATATGTATGTTTCAAGGAAAGCTAAGGGATGGTTTTATAGACATCACTATGAAAGCACTCATCCGAGAATAAGTTCAGAAGTACACATCCCACTAGGGGATGCGAAATTGGTAATAACAACATATTGGGGTTTACATACAGGAGAAAGAGACTGGCATTTGGGTCAGGGAGTCTCCATAGAATGGAGGGAAAAGAGATATAGCACACAATTAGACCCTAACCTAGCAGACCAACTAATTCATCTGCATTACTTTGATTGTTTTTCAGAATCTGCTATAAGAAATGCCATATTAGGACATGTAGTTAGCCCTAGGTGTGAATATCAAGCAGGACATAACAAGGTAGGATCTCTACAGTACTTGGCACTAACAGCATTAATAAGACCAAGAAAAAAGATAAAGCCACCTTTGCCTAGTGTTACGAAACTGACAGAGGATAGATGGAACAAGCCCCAGAAGACCAAGGGCCACAAAGGGAGCCATACAATGAATGGACACTAGAACTGTTAGAGGAGCTCAAGAATGAAGCTGTTAGACATTTTCCTAGGATATGGCTCCAGAGCTTAGGGCAATATATCTATGAAACTTATGGAGATACTTGGGCAGGAGTGGAAGCCATAATAAGAATTCTGCAACAACTGCTGTTTATTCATTTCAGAATTGGGTGTCAACATAACAGAATAGGCATTCTTCGACGAAGGAGAGCAAGAAATGGAGCCAGTAGATCCTAGACTAGAGCCCTGGAAGCATCCAGGAAGTCAGCCTAAGACTGCTTGTACCAATTGCTATTGTAAAAAGTGTTGCTTTCATTGCCAAGTTTGTTTCATAACAAAAGGCTTAGGCATCTCCTATGGCAGGAAGAAGCGGAGACAGCGACGAAGAGCTCCTCAAGACAGTCAGACTCATCAAGTTTCTCTATCAAAGCAGTAAGTAGTACATGTAATGCAATCTTTACAAATATTAGCAGTAGTAGCATTAGTAGTAGCAGCAATAATAGCAATAGTTGTGTGGTCCATAGTATTCATAGAGTGTAGGAAAATAAGAAGACAAAAGAAAATAGAAAGGTTAATTGATAGAATAATAGAAAGAGCAGAAGACAGTGGCAATGAGAGTGACGGAGATCAGGAAGAATTATCAGCACTTGTGGAAATGGGGCACGATGCTCCTTGGGATGTTAATGATCTGTAAAGCTGCAGAAAATTTGTGGGTCACAGTTTATTATGGGGTACCTGTGTGGAAAGAAGCAACCACCACTCTATTTTGTGCCTCAGATGCTAAAGCGTATGATACAGAGGTACATAATGTTTGGGCCACACATGCCTGTGTACCCACAGACCCCAACCCACAAGAAGTAGAACTGAAGAATGTGACAGAAAATTTTAACATGTGGAAAAATAACATGGTAGACCAAATGCATGAGGATATAATTAGTTTATGGGATCAAAGCCTAAAGCCATGTGTAAAACTAACCCCACTCTGTGTTACTTTAAATTGCACTGATTATGGGAATGATACTAACACCAATAATAGTAGTGCTACTAACCCCACTAGTAGTAGCGGGGGAATGGGGGGGAGAGGAGAAATAAAAAATTGCTCTTTCAATATCACCACAAGCATAAGAGATAAGGTGCAGAAAGAATATGCACTTTTTTATAGTCTTGATGTAATACCAATAAAAGATGATAATACTAGATATATGTTGAGAAGTTGTAACACCTCAGTCATTACACAGGCTTGTCCAAAGGTATCCTTTGAGCCAATTCCCATACATTATTGTGCCCCGGCTGGTTTTGCGATTCTAAAGTGTAATGATAAAAAGTTCAATGGAAAAGGACCATGTACAAATGTCAGCACAGTACAATGTACACATGGAATTAGGCCAGTAGTATCAACTCAACTGCTGTTAAATGGCAGTCTAGCAGAAGAAGAGGTAGTAATTAGATCAGACAATTTCTCGGACAATGCTAAAGTCATAATAGTACATCTGAATGAATCTGTAGAAATTAATTGTACAAGACTCAACAACAATACAAGGAGAAGTATACATGTAGGACATGTAGGACCAGGCAGAGCAATTTATACAACAGGAATAATAGGAAAAATAAGACAAGCACATTGTAACATTAGTAGAGCAAAATGGAATAACACTTTAAAACATATAGTTACAAAATTAAGAGAACAATTTGGGAATAAAACAATAGTCTTTAATCAATCCTCAGGAGGGGACCCAGAAATTGTAATGCACAGTTTTAATTGTGGAGGAGAATTTTTCTACTGTAATTCAACACAACTGTTTAACAGTACTTGGAATGGTACTGCATGGTCAAATAACACTGAAGGAAATGAAAATGACACAATCACACTCCCATGCAGAATAAAACAAATTATAAACATGTGGCAGGAAGTAGGAAAAGCAATGTATGCCCCTCCCATCAAAGGACAAATTAGATGTTCATCAAATATTACAGGGCTGATATTAACAAGAGATGGTGGTATTAACCAGACCAACACCACCGAGATTTTCAGGCCTGGAGGAGGAAATATGAAGGACAATTGGAGAAGTGAATTATATAAATATAAAGTAGTAAAAATTGAACCATTAGGAGTAGCACCCACCAAGGCAAAGAGAAGAGTGGTGCAAAGAGAAAAAAGAGCAGTGGGAATAATAGGAGCTATGCTCCTTGGGTTCTTGGGAGCAGCAGGAAGCACTATGGGCGCAGCGTCAATGACGCTGACGGTACAGGCCAGACAATTATTGTCTGGTATAGTGCAACAGCAGAACAATTTGCTGAGGGCTATTGAGGCGCAACAGCATCTGTTGCAACTCACAGTCTGGGGCATCAAGCAGCTCCAAGCAAGAGTCCTGGCTGTGGAAAGATACCTAAGGGATCAACAGCTCCTGGGGATTTGGGGTTGCTCTGGAAAATTCATTCGCACCACTGCTGTGCCTTGGAATACTAGTTGGAGTAATAAATCTCTGAATCAGATTTGGGATAACATGACCTGGATGCAGTGGGAAAGGGAAATTGATAATTACACAAGCTTAATATACACCTTAATTGAAGAATCGCAAAACCAACAAGAAAAGAATGAACAAGAGTTATTGGAATTAGATAACTGGGCAAGTTTGTGGAATTGGTTTAGCATAACAAATTGGCTGTGGTATATAAAAATATTCATAATGATAGTAGGAGGCTTGGTAGGTTTAAGAATAGTTTTTACTGTACTTTCTATAGTAAATAGAGTTAGGCAGGGATACTCACCATTGTCGTTTCAGACCCGCCTCCCAGCCAGGAGGGGACCCGACAGGCCCGAAGGAATCGAAGAAGAAGGTGGAGAGAGAGACAGAGACAGATCCGGTCAATTAGTGGATGGATTCTTAGCAATTATCTGGGTCGACCTGCGGAGCCTGTGCCTCTTCAGCTACCACCGCTTGAGAGACTTACTCTTGATTGTGACGAGGATTGTGGAACTTCTGGGACGCAGGGGGTGGGAAGCCCTCAAATATTGGTGGAATCTCCTACAATATTGGATTCAGGAACTAAAGAATAGTGCTGTTAGCTTGCTCAACGCCACAGCCATAGCAGTAGCTGAGGGGACTGATAGGGTTATAGAAGTATTACAAAGAGCTTTTAGAGCTATTCTCCACATACCTAGAAGAATAAGACAGGGCTTGGAAAGGGCTTTGCAATAAGATGGGTGGCAAGTGGTCAAAAAGTAGTAAAATTGGATGGCCTACTGTAAGGGAAAGAATGAGAAGAGCTGAGCCAGCAGCAGATGGGGTGGGAACAGTATGAAGCACAAGAGGAGGAGGAAGTGGGTTTTCCAGTCAGACCTCAGGTACCTCTAAGACCAATGACTTACAAGGCAGCGTTCGATCTTAGCCACTTTTTAAAAGAAAAGGGGGGAC
>B.KR.97.WK_AF224507_H.CF.90.056_AF005496
GGGTCTCTCTGGTTAGACCAGATCTGAGCCTGGGAGCTCTCTGGCTAACTAGGGAACCCACTGCTTAAGCCTCAATAAAGCTTGCCTTGAGTGCTCAAAGTAGTGTGTGCCCGTCTGTTGTGTGACTCTGGTAACTAGAGATCCCTCAGACCATTTTAGTCAGTGTGGAAAATCTCTAGCAGTGGCGCCCGAACAGGGACTTGAAAACGAAAGTAGAACCGGAGGAGCTCTCTCGACGCAGGACTCGGCTTGCTGAAGCGCGCACGGCAAGAGGCGAGGGGCGGCGACTGGTGAGTACGCCAAAAATTTTGACTAGCGGAGGCTAGAAGGAGAGAGATGGGTGCGAGAGCGTCAATATTAAGCGGGGGAGAATTAGATCAATGGGAAAAAATTCGGTTAAGGCCAGGAGGAAAGAAAAAATATAGGTTAAAACATCTAGTATGGGCAAGCAGGGAGCTAGAAAGGTTCGCAGTTAATCCTGGCCTGTTAGAAACATCAGAAGGTTGTAGACAAATATTGGGACAGCTACAACCATCCCTTCAGACAGGATCAGAAGAACTTAAATCATTATTTAATGCAGTAGCAGTCCTCTATTGTGTACATCAAAGGATAGAGATAAAAGACACCAAGGAAGCTTTAGAGAAAATAGAGGAAGAGCAAAGCAAAAGTAAGAAAAAGGCACAGCAAGCAACAGCTGACACAGGAAGCAGCAGCCAGGTCAGCCAAAATTACCCTATAGTGCAGAACCTCCAGGGGCAAATGGTACATCAGCCCATATCACCTAGAACTTTAAATGCACGGGTAAAAGTAATAGAAGAGAAGGCTTTCAGCCCAGAGGTAATACCCATGTTTTCAGCATTATCAGAAGGGGCCACCCCACAAGATTTAAACACCATGTTAAACACAGTGGGGGGACATCAAGCAGCTATGCAAATGTTAAAAGAGACCATCAATGAGGAAGCTGCAGACTGGGATAGATTGCATCCAGTGCATGCAGGGCCTATTGCACCAGGCCAGATGAGAGAACCAAGGGGAAGTGACATAGCAGGAACTACTAGTACCCTTCAGGAACAAATAGGATGGATGACAAATAATCCACCTATCCCAGTAGGAGAAATCTATAAAAGATGGATAATCCTGGGATTAAATAAAATAGTAAGAATGTATAGCCCTGCCAGCATTCTGGACATAAGACAAGGACCAAAGGAACCCTTTAGAGACTATGTAGACCGGTTCTATAAAACTCTAAGAGCCGAGCAAGCGTCACAGGAGGTAAAAAATTGGATGACAGAAACCTTGTTGGTCCAAAATGCAAACCCTGATTGTAAGACTATTTTAAAAGCATTGGGACCAGGAGCTACACTAGAAGAAATGATGACAGCATGTCAGGGAGTGGGAGGACCCAGCCATAAAGCAAGAGTTTTGGCTGAAGCAATGAGCCAAGCAACAAATTCAGCCACCATAATGATGCAGAGAGGCAATTTCAGGAACCAAAGAAGGACTGTTAAGTGTTTCAATTGTGGCAAAGAAGGGCACATAGCCAAAAATTGCAGGGCCCCTAGGAAAAAGGGATGTTGGAAATGTGGAAAGGAAGGACACCAAATGAAAGATTGTACTGAGAGACAGGCCAATTTTTTAGGGAAGATCTGGCCTTCCCACAAGGGAAGGCCAGGGAATTTCCTTCAGAGCAGACCAGAGCCATCAGCCCCGCCAGAAGAGAGCTTCAGGTTTGGGGAAGAGACAACAACTCCCTCTCAGAAGCAGGAGCCAATAGACAAGGAACTGTATCCTTTAGCTTCCCTCAGATCACTCTTTGGCAACGACCCCTCGTCGCAATAAAGATAGGGGGGCAACTAAAGGAAGCTCTATTAGATACAGGAGCAGATGATACAGTATTAGAAGAAATGAGTTTACCAGGGAGATGGAAACCAAAAATGATAGGGGGAATTGGAGGTTTTATCAAAGTAAGACAGTATGATCAGGTAGCCATAGAAATCTGTGGACATAAAGCTATAGGTACAGTATTAATAGGACCTACACCTGTCAACATAATTGGAAGAAATCTGTTGACTCAGATTGGCTGCACTTTAAATTTTCCCATTAGTCCTATTGAAACTGTACCAGTAAAATTAAAGCCAGGAATGGATGGTCCAAAAGTTAAACAATGGCCATTGACAGAAGAAAAAATAAAGGCATTAGTAGAAATTTGTACAGAAATGGAAAAGGAAGGAAAAATTTCAAAAATTGGGCCTGAAAATCCATATAATACTCCAGTATTTGCTATAAAGAAAAAAGACAGTACTAAATGGAGAAAATTAGTAGATTTCAGAGAACTTAATAAGAGAACTCAAGACTTCTGGGAAGTTCAATTAGGAATACCACATCCAGCAGGGTTAAAAAAGAAAAAATCAGTAACAGTACTGGATGTGGGTGATGCATATTTTTCAGTTCCCTTAGATGAGGACTTCAGAAAGTATACTGCATTTACCATACCTAGTACAAACAATGAGACACCAGGGATTAGATATCAGTACAATGTGCTTCCACAGGGGTGGAAAGGATCGCCAGCGATATTCCAAAGTAGCATGACAAAAATCTTAGAGCCTTTTAGAAAACAAAATCCAGACATAGTTATCTATCAATACATGGATGATTTATATGTAGGATCTGACTTAGAAATAGGACAGCATAGAATAAAAATAGAGGAACTGAGACAACATCTGTTGAGGTGGGGGTTTACCACACCAGACAAAAAACATCAGAAAGAGCCTCCATTCCTTTGGATGGGTTATGAACTCCATCCTGATAAATGGACAGTACAGCCTATAGTGCTACCAGAAAAAGATAGCTGGACTGTCAATGACATACAGAAGTTAGTGGGAAAACTGAATTGGGCAAGTCAGATTTATGCAGGCATTAAAGTAAAGCAATTATGTAAACTCCTTAGGGGAACCAAGGCACTAACAGAAGTAGTACCACTAACAGAAGAAGCAGAGCTAGAACTGGCAGAAAACAGGGAAATTCTAAAAGAACCAGTACATGGAGTGTATTATGACCCAGCAAAAGACTTAATAGCAGAGATACAGAAGCAGGGGCAAGGCCAATGGACATATCAAATTTATCAAGAGCCATTTAAAAATCTAAAAACAGGAAAATATGCAAGAATGAGGGGTGCCCACACTAATGATGTAAAACAATTAACAGAGGCTGTGCAAAAAGTAGCCATAGAAAGCATAGTAATATGGGGAAAGACTCCTAAATTTAAACTACCCATACAAAAAGAAACATGGGAAGCATGGTGGACAGAGTATTGGCAAGCCACTTGGATTCCTGAGTGGGAGTTTGTCAATACCCCTCCCTTAGTGAAGTTATGGTACCAGTTAGAGAAAGAACCCATAGTAGGAGCAGAAACTTTCTATGTAGATGGGGCAGCTAATAGGGAAACTAAATTAGGAAAAGCAGGATATGTTACTGACAGAGGAAGACAAAAGGTTGTCCCCCTAACGGACACAACAAATCAGAAGACTGAGTTACAAGCAATTCATCTAGCTTTGCAGGATTCAGGATTAGAAGTAAACATAGTAACAGACTCACAATATGCATTAGGAATCATTCAAGCACAACCAGATAAAAGTGAATCAGAGTTAGTCAGCCAAATAATCGAGCAGTTAATAAAAAAGGAAAAGGTCTACCTGGCATGGGTACCAGCACACAAAGGAATTGGAGGAAATGAACAAGTAGATAAATTAGTCAGTGCTGGAATCAGGAAAGTACTGTTTCTAGATGGAATAGATAAGGCCCAAGAAGAGCATGAAAAATATCACAGTAATTGGAGAGCAATGGCTGGTGATTTTAACCTGCCACCTGTGGTAGCAAAAGAAATAGTAGCCTGCTGTGATAAATGTCAGCTAAAAGGAGAAGCCATGCATGGACAAGTAGACTGTAGTCCAGGAATATGGCAGCTAGATTGTACACATTTAGAAGGAAAAGTTATCCTGGTAGCAGTTCATGTAGCCAGTGGATATATAGAAGCAGAAGTTATTCCAGCAGAGACAGGGCAGGAAACAGCATACTTTCTCTTAAAATTAGCAGGAAGATGGCCAGTAAAAACAATACATACAGACAATGGCAGCAATTTCACCAGTAATACAGTTAAGGCCGCCTGTTGGTAGGCGAGGATCAAGCAGGAATTTGGCATTCCCTACAATCCCCAAAGTCAAGGAGTAGTAGAATCTATGAATAAAGAATTAAAGAAAATTATAGGACAGGTAAGAGATCAAGCTGAACATCTTAAGACAGCAGTACAAATGGCAGTATTCATCCACAATTTTAAAAGAAAAGGGGGGATTGGGGGGTACAGTGCAGGGGAAAGGATAATAGACATAATAGCAACAGACATACAGACCAAAGAACTACAAAAACAAGTTACAAAAATTCAAAATTTTCGGGTTTATTACAGGGACAGCAGAGATCCACTTTGGAAAGGACCAGCAAAGCTTCTCTGGAAAGGTGAAGGGGCAGTAGTGATACAAGATAATAGTGACATAAAAGTAGTGCCAAGAAGAAAAGCAAAGATCATTAGGGATTATGGAAAACAGATGGCAGGTGATGATTGTGTGGCAAGTAGACAGGATGAGGATTAAAACATGGAAAAGTTTAGTAAAACACCATATGTATATTTCAAAGAAAGCTAAGGAATGGGTCTATAGACATCACTATGAAAGCACTCATCCAAGAATAAGTTCAGAAGTACACATCCCACTAGGGGATGCTAAATTAGTAATAACAACATATTGGGGTCTGCATACAGGAGAAAGAGAATGGCATCTGGGTCAGGGAGTCTCCATAGAATGGAGGAAAAAGAGATATAATACACAAGTAGACCCTGACCTAGCAGACAAACTAATCCACCTGCATTATTTTGATTGTTTTTCAGACTCTGCTATAAGACATGCCATATTAGGACATAGAGTTAGGCCTAAGTGTGAATATCAAGCAGGACATAACAAGGTAGGGTCTCTACAGTACTTGGCACTAACAGCATTAATAACACCAAAAAAGATAAAGCCACCTTTGCCTAGTGTTAGGAAACTAACAGAGGATAGATGGAACAAGCCCCAGAAGACCAAGGGCCACAGAGGGAGCCATACAATGAATGGACACTAGAGCTCTCAGAGGAACTTAAGAGTGAAGCTGTTAGACATTTTCCTAGGCCATGGCTCCATAGCTTAGGACAACATATCTATGAAACTTATGGGGATACTTGGACAGGAGTAGAAGCCATAATAAGAATTCTGCAACAACTGCTGTTTATTCATTTCAGAATTGGATGTCACCATAGCAGGTTAGGCATTATTCGACAGAGGAGAGCAAGGAATGGAGCCAGTAGATCCTAGACTAGAGCCCTGGAAGCATCCAGGAAGTCAGCCTAAGACTCCTTGTACCAAATGCTATTGTAAAAAGTGTTGCCTTCATTGTCAAGTTTGCTTCATGACAAAAGGCTTAGGCATATCCTATGGCAGGAAGAAGCGGAGACAGCGACGAAGAGCTCCTCAGGACAATAAGAATCATCAAGTTTCTCTATCAAAGCAGTAAGTAATACGTGTGATGCAACTTTTAGCAATATTAGCAATAGTAGGATTAGTAGTAGCAGCAATATTAGCAATAGTTGTGTGGTTCATAGTATTCATAGAATATAAGAAAATATTAAAACAAAAAAAAATAGACAGGTTAATTGATAGAATAAGAGAAAGAGCAGAAGACAGTGGCAATGAGAGTGAAGGGGATCAGGAAGAATTATCAGCACTGGTGGAGATGGGGCATCATGCTCCTTGGGATGTGGATGATCTGTAGTGCTGCAGAAAAATTGTGGGTCACAGTCTATTATGGGGTACCTGTGTGGAAAGAAGCAACCACCACCCTATTCTGTGCATCAGACGCTAAAGCATATGACACAGAGGTACATAATGTTTGGGCCACACATGCCTGTGTACCCATAGACCCCAACCCACAAGAAGTATTTTTGGAAAATGTGACAGAAAATTTTAACATGTGGAAAAATAACATGGTAGAACAGATGCATGAGGATATAATCAGTTTATGGGATCAAAGCCTAAAGCCATGTGTAAAACTAACTCCACTCTGTGTTACTTTAAAGTGCACTGATTTGAATGATACTAATACCAATAATAGTAGTACTTCGGAAAATAATACTAATCCCACTATTAGCACTAGCAGTATGGAGGCAGGAGGGGAACTAACAAATTGCTCTTTCAATGTAACTACAGTACTAAGAGATAAGCAGCAGAAAGTACATGCACTCTTTTATAGACTTGATGTAGTACCAATTGATAACAATAGTACTCAGTATAGGCTAATAAATTGTAATACCTCAGTCATTACACAGGCTTGCCCAAAGGTGTCCTTTGAACCTATTCCCATACATTATTGTGCTCCAGCTGGCTTTGCGATTCTAAAATGTAATGATAAGAAGTTCAATGGAACAGGACCATGTTCAAATGTCAGCACAGTACAATGTACACATGGAATTAGGCCAGTAGTATCAACTCAACTGCTGTTAAATGGCAGTCTAGCAGAAGAAGAGATAGTACTTAGATCTGAAAATTTCACAAACAATGCTAAAACCATAATAGTACAGCTGAATGCATCTGTAGAAATTAATTGTACAAGACTCAACAACAATACAAGGAAAAGTATAAGGATAGGACCAGGAAGCACATTTTATGCAACAGGAGCCATAATAGGAGATATAAGACAAGCACATTGTAACATTAGTAGAGAAAAATGGAATGACACTTTAAAACAGCTAGTTATAAAATTAGGAGAGCAATTTGGGAATAGTAACATAATAGTCTTTAAACAATCCTCAGGAGGGGACCCAGAGATTGTAATGCACAGTTTTATTTGTGGAGGGGAGTTTTTCTACTGTAATACAACACAACTGTCTAATAGTACTTGGCAGAGGTCTGATGGTACTTGGAATAGAACTGGAGGGTTAAATGAAACTAAAGAAAATATCACACTCCCATGCAGAATAAAACAAATTATAAACAGGTGGCAGGAAGTAGGAAAAGCAATGTATGCCCCTCCCATCAGTGGACTAATTAGATGTTCATCAAATATTACAGGGCTGCTATTAACAAGAGATGGGGGGAATGAGAACAATGGGACCAATGGGACTGAGACCTTCAGACCTGAGGGAGGAAATATGAAGGACAATTGGAGAAGTAAATTATATAAATATAAAGTAGTAAGAATTGAGCCATTAGGGATAGCACCCACCAGGGCAAGGAGAAGAGTGGTGCAGAGAGAAAAAAGAGCAGTAACATTCGGAGCTCTGTTCCTTGGGTTCTTGGGAGCAGCAGGAAGCACTATGGGCTGCACGTCAATGACGCTGACGGTACAGGCCAGACTATTATTGTCTGGTATAGTGCAACAGCAGAATAATTTGCTGAGAGCTATTGAGGCGCAACAGCATCTGTTGCAACTCACAGTCTGGGGCATCAAGCAGCTACAGGCAAGAGTCCTGGCTGTGGAAAGGTACCTAAGAGATCAACAGCTCCTGGGGATTTGGGGATGCTCTGGAAAGCTCATCTGCACCACTAATGTGCCTTGGAATACTAGTTGGAGTAATAAATCTGAGAATGAGATCTGGGATAACATGACCTGGATGGAGTGGGACAGAGAAATTAACAATTACACAAACTTAATATACGACCTACTTGAAAAATCGCAGAACCAACAAGAAAAAAATGAACAGGAACTATTGGAATTGGATAAATGGGCAAGTTTGTGAAATTGGTTTAACATAACAAAATGGCTGTGGTATATAAAAATATTCATAATGATAGTAGGAGGCTTAGTAGGTTTAAGAATAATTTTCTTTGTACTTTCTATAGTGAATAGAGTTAGGCAGGGATACTCACCATTATCGTTTCAGACCCACTTCCCGAGCCCGAGGGGACCCGACAGGCCAGGAGGAATCGAAGGAGAAGGTGGAGAAGGAGACAGTGGTGGATCCAGTCACTTAGTGGATGGATTCTTAACACTCATCTGGGTCGACCTGCGGAGCCTGTGCCTCTTCAGCTACCACCTCTTGAGAGACTTACTCTTGATTGTAACGAGGAGTGTGGAACTTCTGGGACTCAGGGGGTGGGAAATCCTCAAATACTTGTGGAATCTCCTGCAGTATTGGAGTCAGGAACTAAAGAATAGTGCTGTTAGTTTGCTTAATGCCACAGCTGTAGCAGTAGCTGAGGGGACAGATAGGATTATAGAAATATTACAAAGAGCTTATAGAGCTATTCTCAACATACCTAGAAGAATAAGACAGGGCTTGGAAAGGGCTTTGCTATAAGATGGGTGGCAAGTGGTCAAAACGTAGTGTGCCAGGGTGGAATACTATAAGGAAAAGAATGAGACGAGCTGAGCCAGCAGCAGAAGGGGTGGGAGCAGCATCTCGAGACCTGGAACAACGTGGAGCAATCACAACTAGTAATACAGCAAGTAACAATGCTGCTTGTGCCTGGCAGGAAGCACAAGAGGAGGAGGAGGTGGGTTTTCCAGTCAGACCTCAGGTACCCTTAAGACCAATGACTTACAAGTCAGCTTTAGATCTCAGCCACTTTTTAAAAGAAAAGGGGGGGCTGGAAGGGCTAGTTTACTCCCAAAAAAGACAAGATATCCTTGATCTGTGGGTCTACCACACACAAGGCTTCTTCCCTGATTGGCAGAACTACACACCAGGGCCAGGGACCAGATTTCCACTGACCTTCGGGTGGTGCTTCAAGCTAGTACCAGTTGAGCCAGAAAAGGTAGAAGAGGCCACTGTAGGAAAAAACAACTGCTTGTTACACCCCATGAACCTGCATGGAATGGATGACCCAGAGGGAGAAGTGTTAGTGTGGAGATTTGACAGCCGCCTAGCATTTCATCACATGGCCCGAGAGAAACATCCGGAGTACTACAAGGACTGCTGACATCGAGCTAAGGACTGCTGACATCGAACTTTCTACAAGGGACTTTCCGCTGGGGACTTTCCGCAGGGAGGCGTGGACTGGGCGGGACTGGGGAGTGGCGAGCCCTCAGATGCTGCATAAAAGCAGCTGCTTTTTGCCTGTACTGGGTCTCTCTGGTTAGACCAGATCTGAGCCTGGGAGCTCTCTGGCTAACTAGGGAACCCACTGCTTAAGCCTCAATAAAGCTTGCCTTGAGTGCTTCAAGT
>B.AU.x.8634991_AY857144_J.SE.94.SE7022_AF082395
TACGCCAAAAAATAAAAATTTTGACTAGCGGAGGCTAGAAGGAGAGAGATGGGTGCGAGAGCGTCAGTATTAAGCGGGGGAGAATTAGATAGATGGGAAAAAATTCGGTTAAGGCCAGGGGGAAAGAAAAAATACAGATTAAAACATATAGTATGGGCAAGCAGGGAGCTAGAGCGATTCGCAGTTAATCCTGGCCTTTTAGAAACATCAGGAGGCTGTAGACAAATACTAGAACAGCTACAACCATCCCTTCAGACAGGATCAGAAGAACTTAGATCATTATATAATACAGTAGCAACCCTCTATTGTGTGCATCAAAAGATAGAGGTAAAAGACACCAAAGAAGCTCTAGATAAGATAGAGGAAGAGCAAAACAAAAGTAAGAAACAGGCACAGCAAGCAGCTGGCACAGGAAGCAACAGCCAGGCCAGCCAGAACTACCCTATAGTGCAGAACCTACAGGGGCAAATGGTACATCAGCCCATATCACCTAGAACTTTAAATGCATGGGTAAAAGTAGTAGAAGAGAAAGCTTTCAGCCCAGAAGTAATACCCATGTTTTCAGCATTATCAGAAGGAGCCACCCCACAAGATTTAAACACCATGCTAAACACAGTGGGGGGACATCAAGCAGCCATGCAGATGTTAAAAGAAACCATCAATGAGGAAGCTGCAGATTGGGATAGATTGCATCCAGTGCATGCAGGGCCTATTGCACCAGGCCAGATGAGAGAACCAAGGGGAAGTGACATAGCAGGAACTACTAGTACCCTTCAAGAACAAATAGGATGGATGACAAATAATCCACCTATCCCAGTAGGGGAAATTTATAAAAGATGGATAATCCTGGGATTAAATAAAATAGTAAGAATGTATAGCCCTACCAGCATTCTGGACATAAAACAAGGACCAAAGGAACCCTTTAGAGACTATGTAGACCGGTTCTATAAAACTCTAAGAGCCGAGCAAGCTACACAGGAAGTAAAAAATTGGATGACAGAAACCTTGTTGGTCCAAAATGCGAACCCAGATTGTAAGACTATCTTAAAAGCATTGGGACCAGCAGCCACACTAGAAGAAATGATGACAGCATGTCAGGGAGTGGGGGGCCCCGGTCATAAAGCAAGAGTTTTGGCTGAAGCAATGAGCCAGGTAACAAATTCAGCTACCATAATGATGCAGAAAGGCAACTTTAGGAATCAAAGAAGGCCTGTTAAGTGTTTTAATTGTGGCAAGGAAGGGCACATAGCAAGAAATTGCAGGGCCCCTARAAAAAGGGGCTGTTGGAAATGTGGRAAAGAAGGACACCAAATGAAAGAGTGCACTGAGAGACAGGCTAATTTTTTAGGGAAGATCTGGCCTTCCCACAGGGGAAGGCCAGGGAACTTTCTTCAGAGCAGACCAGAGCCATCAGCCCCACCAGAAGAGAGCTTCAGGTTTGGGGAAGAGACAACAGCTCCCTCACAGAAGCAGGAGCCGATAGACAAGGAAGTGTATCCTTTAGCTTCCCTCAGATCACTCTTTGGCAACGACCCCTCGTCACAATAAAGATAGGGGGGCAACAAAAGGAAGCTCTGTTAGATACAGGAGCAGATGATACAGTAATTGAAGAAATGAGTTTGCCAGGAAGATGGAAACCAAAAATGATAGGGGGAATTGGAGGTTTTATCAAGTAAAACAGTATGATCAGATACTCATAGAAATCTGTGGACATAAAACTATAGGTACAGTATTAATAGGACCTACACCTGTCAACATAATTGGAAGAAATCTGTTGACTCAGCTTGGCTGCACTTTAAATTTTCCCATTAGTCCTATTGAAACTGTACCAGTAAAATTAAAGCCAGGAATGGATGGCCCAAAAGTTAAACAATGGCCACTGACAGAAGAAAAAATAAAGGCATTGGTAGAAATTTGTACAGAAATGGAAAAGGAAGGAAAAATTTCAAAGATTGGGCCTGAAAATCCATACAATACTCCAGTATTTGCCATAAAGAAAAAAGACAGTAATAGATGGAGAAAATTAGTAGATTTCAGGGAACTTAATAAAAGAACTCAAGACTTCTGGGAAGTTCAATTAGGAATACCACATCCTGCAGGGTTAAAAAAGAAAAAATCAGTAACAGTACTGGATGTGGGTGATGCATATTTTTCAGTTCCCTTAGATAAAGACTTCAGGAAGTATACTGCATTTACCATACCTAGTATAAACAATGAGACACCCGGGATTAGATATCAGTACAATGTGCTTCCACAGGGATGGAAAGGATCACCATCAATATTCCAAAGTAGCATGACAAAAATCTTAGATCCTTTTAGAAAGCAAAATCCAGACATAGTTATCTGCCAATATATGGATGATTTGTATGTAGGATCTGACTTAGAAATAGGGCAGCATAGAGCAAAAATAGAGGAACTGAGAGAACATCTGTTGAAGTGGGGACTCACCACACCAGACAAAAAGCATCAGAAAGAACCTCCATTCCTTTGGATGGGTTACGAACTCCATCCTGACAAATGGACAGTACAACCTATAGTGCTGCCAGAAAAAGATAGCTGGACTGTCAATGACATACAGAAGTTAGTAGGAAAATTGAATTGGGCAAGTCAGATTTATGCAGGAATTAAAGTAAGGCAATTATGTAAACTCCTTAGGGGAACCAAAGCACTAACAGAAGTAGTGCCACTAACAGAAGAAGCAGAGCTAGAACTGGCAGAAAACAGGGAGATTTTAAAACAACCGGTACATGGAGTGTATTATGACCCAACAAAAGACTTAATAGCAGAAATACAGAAGCAGGGGCTAGGCCAATGGACATATCAAATTTATCAGGAGCCATTTAAAAACCTGAAAACAGGGAAATATGCAAAAAGGAGGAGTGCCCACACTAATGATGTAAAGCAATTATCACAAGTGGTGCAAAAAATAGCCTTGGAAGCCATAGTGATATGGGGAAAAACTCCTAAATTTAGACTACCCATACAAAAGGAAACATGGGAGACATGGTGGACAGACTATTGGCAGGCCACCTGGATTCCTGAGTGGGAGTTTGTCAATACCCCTCCCTTAGTGAAATTATGGTACCAGTTAGAGACAGAACCCATAGTAGGAGCAGAAACCTTCTATGTAGATGGGGCAGCTAATAGGGAAACCAAATTAGGCAAAGCAGGATATGTTACTGACAGAGGAAGACAAAAAGTTGTCTCCATAACAGATACAACAAATCAGAAGACTGAGTTACAAGCAATTCACCTAGCTTTGCAGGATTCGGGATTAGAGGTAAACATAGTAACAGACTCACAATATGCATTAGGAATTATTCAAGCACAACCAGATAAGAGTGAATCAGAGTTAGTCAGTCAAATAATAGAGCAGTTAATAAAAAAGGAGAAGGTCTACCTAGCATGGGTACCAGCACACAAAGGAATTGGAGGAAATGAACAAGTAGATAAATTAGTCAGTGCTGGAATCAGGAGAGTACTATTTTTAGATGGAATAGATAAGGCCCAAGAAGACCATGAGAAATATCACAGTAATTGGAGAACAATGGCTAGTGATTTTAACCTGCCACCTGTGGTAGCAAAAGAAATAGTGGCCAGCTGTGATAAGTGTCAGCTAAAAGGAGAAGCCATGCATGGACAAGTAGACTGTAGTCCAGGAATATGGCAGCTAGATTGTACACATTTAGAGGGAAAAATTATCCTGGTAGCAGTTCATGTAGCTAGTGGATATATAGAAGCAGAAGTTATCCCAGCAGAGACAGGACAAGAAACAGCATACTTTCTCTTAAAATTAGCAGGAAGATGGCCAGTAAAAATAATACATACAGACAATGGCCCCAATTTCATCAGCACTACGGTTAAGGCAGCCTGTTGGTGGGCGGGAATCAAGCAGGAATTTGGTATTCCCTACAATCCCCAAAGTCAAGGAGTAATAGAATCTATGAATAAAGAATTAAAGAAAATTATAGGACAGGTAAGGGATCAGGCTGAACATCTTAAGACAGCAGTACAAATGGCAGTATTCATCCACAATTTTANNNNNNNNNNNNNNNNNNNNNNNNNNNNNNNNNNNNNNNNNNNNGTAGACATAATAGCAACAGACATACAAACTAAAGAATTACAAAAACAAATTACAAAGATTCAAAATTTTCGGGTTTATTACAGGGACAGCAGAGATCCGCTTTGGAAAGGACCAGCAAAGCTTCTCTGGAAAGGTGAAGGGGCAGTAGTAATACAAGACAATAGTGAAATAAAAGTAGTGCCAAGAAGAAAAGCAAAAATCATTAGGGATTATGGAAAACAGATGGCAGGTGATGATTGTGTGGCAAGTAGACAGGATGAGGATTAACACATGGAAAAGTTTAGTAAAACACCATACGCATGTTTCAGGGAAAACTAAGAAATGGACTTATAAACATCACTATGAAAGCATTAATCCAAGAATAAGTTCAGAAGTACACATCCCACTAGGGGATGCTAGATTAGTAATAACAACATATTGGGGCCTGCATACAGGAGAAAGAGAMTGGCATTTGGGTCAGGGAGTCTCCATAGAATGGAGGAAAAGGAGATATAGCACACAAGTAGACCCTGAACTAGCAGACCAACTAATTCNNNNNNNNNNNNNNNNNNNNNNNNNNNNNNNNNNNNNNNNNNNNNNCATATTRGGACGTATAGTTAGACCTAGGTGTGAATATCAAGCAGGACATAACAAGGTAGGGACTCTACAGTACTTGGCATTAACAGCATTAATAACACCAAAGAAGAGAAAGCCACCCTTGCCCAGTGTTAGGAAACTGACAGAGGATAGATGGAACAAACCCCAGAGAACCAAGGGCCACAGAGAGAGCCATACAATGAGTGGACACTAGAACTTTTGGAGGAACTTAAGAGAGAAGCTGTTAGACATTTTCCTAGGCCATGGCTCCATAACTTAGGACAACATATCTATGAAACTTATGGGGACACTTGGGCAGGAGTGGAAGCCATAATAAGAATTCTACAACAACTGCTGTTTATTCATTTCAGAATTGGATGTCAACATAGCAGAATAGGCATTATTCGACAGAGGAGAGCAAGGAATGGAGCCAGTAGATCCTAGCCTAGAGCCCTGGAAGCATCCAGGAAGCCAGCCTAAAACTGCTTGTACTAATTGCTATTGTAAAAAGTGCTGCTTTCATTGCCAAGTTTGTTTCATGAACAAAGGCTTAGGCATCTCCTATGGCAGGAAGAAGCGGAGACAGCGACGAAGAGCTCATCAAAACAGTCAGACTAATCAAGAGCCTCTACCAAAGCAGTGAGTAATATATGTAATGATCTCTATACAAATATTAGCAGTAGTGTCATTAGTAGTAGTAGCAATAATAGCAATAGTTGTGTGGACCATAGTATTAATAGAATATAGGAMAATATTAAGACAAAGAAAGATAGATAGGTTACTTGATAGAATAGTAGAAAGAGCAGAAGACAGTGGCAATGAGAGTGAAGGAGATCAGGAAGAATTGTCAGCGCTTGTGGGGATGGGGCACCATGCYCCTTGGGATGTTAATGATCTGTAGTGCTACAGAACAATTATGGGTCACAGTCTATTATGGGGTACCTGTGTGGAAAGAAGCAAACACCACTCTATTTTGTGCCTCAGATGCTAAAGCATATAAACCAGAGGCACATAATGTCTGGGCCACACATGCCTGTGTACCCACAAACCCTAACCCACAAGAAGTAGTAATGGCAAATGTGACAGAAAAGTTTAATATGTGGAAAAATAACATGGTAGAACAGATGCATGAGGATATAATCAGTTTATGGGATGAGAGTCTAAAGCCATGTGTGAAATTAACCCCACTCTGTGTTATTTTAAATTGCAATTGCACTAAGTTGAATAATAGTAAAAATACCAGTGATAKTAATAGAACGATGGAGGAAGGAATGATGAAAAACTGCTCTTTCAATATCACCACAACAATAGACRAGAAGGTGCAGAAGGAATATGCACTTTTTTATACACTTGATTTAGTACCAATAGATAATGATACTACAAGCTATACATTGATAAATTGTAACACCTCAATCATTACACAGACTTGTCCAAAGATATCCTTTGAACCAATTCCTATACATTATTGTACCCCGGCTGGTTTTGCGATTCTAAAGTGTAATGATAAAAAGTTCAATGGAACAGGACCATGTAAAAACGTCAGCACAGTACAATGTACACATGGAATTAGACCAGTAGTGTCAACTCAACTGTTGTTAAATGGCAGTCTAGCAGAGGAAGAGGTAATAATTAGATCTGAAAATTTCACAAACAATGTTAAAACCATAATAGTACAGCTGAATGAAACTATAAAAATTAATTGTACAAGACCCAACAACAATACAAGAAAAAGTATACCTATAGGACCAGGGAGAGCATTTTATGCAACAGGAGACATAATAGGAGATATAAGACAAGCACATTGTAACATTAGTAGAGCAGATTGGACTAGCGCTTTAACACATATAGCTACAAAATTAAGAGAACAATTTGAGAATAAAACAATAATCTTTGATAGATCCTCAGGAGGGGACCCAGAAATTGTAATGCATAGTTTTAATTGTGGAGGGGAATTTTTCTACTGTAATACARCAAATCTATTTATGGGTGCTTGGAATGGTGCTTGGATAAATAATACTTGGAATAATACTGAAGGTAATACAGATAATATCACACTCCCATGCAGAATAAAACAAATTATAAACAGATGGCAGGGAGTAGGAAAAGCAATGTATGCCCCTCCCATCAAAGGACTAATTAGATGCTCATCAAATATTACAGGGTTACTATTAACAAGAGATGGTGGGAAAAAAACTACTAACAATACCAATGAAACTGAAACCTTCAGACCTGGAGGAGGAAATATGAGAGACAATTGGAGAAGTGAATTATATAAATATAAAGTAGTAAAAATTGAGCCATTAGGAGTAGCACCCACCAAGGCAAAGAGAAGAGTGGTGCAGAGAGAAAAAAGAGCAGTGGGAACGACGATAGGAGCTATGTTCCTTGGTTTCTTGGGAGCAGCAGGAAGCACTATGGGCGCAGCGTCGCTGACGCTGACGGTACAGGCCAGACAATTATTGTCTGGTATAGTGCAACAGCAGAACAATCTGCTGAGGGCTATTGAGGCGCAACAGCATCTGTTGCAACTCACAGTCTGGGGCATTAAGCAGCTCCAGGCAAGAGTCCTGGCTGTGGAAAGATACCTAAGTGACCAGCAGCTCCTAGGGATTTGGGGTTGCTCTGGAAGACTCATTTGCACCACTGCTGTGCCTTGGAATGCTAGCTGGAGTAATAAATCCCTGGATGAGATTTGGAAGAATATGACCTGGATACAGTGGGAGAGAGAAATTGACAATTACACAGGCTTAATATACACCTTAATTGAAGAATCGCAGAACCAGCAAGAGAAAAATGAACAAGACTTATTGGAATTGGATCAGTGGGCAAGTTTGTGGAATTGGTTTAACATAACAAAGTGGCTGTGGTATATAAAAATATTCATAATGATAGTAGGAGGTTTAATAGGTTTAAGAATAGTTTTTGCTGTATTTTCTATAGTGAATAGAGTTAGGCAGGGATACTCACCATTGTCATTGCAGACCCGCTTCCCAGCTCCGAGGGGACCCGACAGGCCCGAAGGAATCGAAGAAGAAGGTGGAGAGAGAGACAGAGGCAGATCCGGTCAATTAGCGAACGGATTCTTGATACTTATCTGGGACGACCTGAGGAGCCTGTGCCTCTTCAGTTACCACCGCTTGAGAGACTTACTCTTGATTGTAACGAGGATTGTGGAACTTCTGGGACGCAGAGGGTGGGAAGTCCTCAAATACTGGTGGAATCTCCTGCAGTATTGGATTCAGGAACTAAAGAGTAGTGCTGTTAGTTTGTTTAATGCCACAGCTATAGTAGTAGCTGAGGGGACAGATAGGGTTATAGAAGTAGTACAAGGAATTGGTAGAGCTATTATCCACATACCTAGAAGAATAAGACAGGGACTAGAAAGGGCTTTGCAGTAAGATGGGTAGCAAGTGGTCAAAGAGTAGTGTGGTTGGATGGCCTGCTGTAAGGGAAAGAATAAAGAAAACTGAGCCAGCAGCAGAAGGGGTGGGAGCAGTATCTAGAGACTTGGAAAAACATGGAGCAGTCACAAGTAGCAATACAGCAGCTACTAATGCTGCTTGTGCCTGGCTAGAAGCACAAGAGGATGA
>B.US.x.AC_59_111_Days_Seq1_fa_DQ127550_K.CM.96.MP535_AJ249239
ATGGGTGCGAGAGCGTCAGTATTAAGCGGGGGGGAATTAGATAGATGGGAAAAAATTCGGTTAAGGCCAGGGGGAAAGAAAAAATATAGATTAAAACATATAGTATGGGCAAGCAGGGAGCTAGAACGATTTGCACTTAATCCAAGCCTGTTAGAAACATCAGAAGGCTGTAGACAAATACTGGGACAGCTACAATCATCCCTTCAGACAGGAACAGAAGAAATTAAATCCTTATATAATACAGTAGCAACCCTCTATTGTGTGCATCAAAGGATAGATGTAAAAGACACCAAGGAAGCTTTAGATAAGATAGAGGAAGAGAAAAACAAAAGTAAGAAAAAGGCACAGGCTGAGCAAGCAGCAGCTGGCACAGGAAACAGCAGCCAGGTCAGCCAAAATTACCCTATAGTGCAAAACATGCAAGGGCAAATGGTACATCAAGCCATATCACCTAGAACTTTAAATGCATGGGTAAAAGTAGTAGAAGAAAAGGCTTTCAGTCCAGAAGTAATACCCATGTTTTCAGCATTATCAGAAGGAGCCACCCCACAAGATTTAAACACCATGCTAAACACAGTGGGGGGACACCAAGCAGCTATGCAAATGTTAAAAGAGACCATCAATGAGGAAGCTGCAGAGTGGGATAGAGTGCACCCAGTGCATGCAGGGCCTATTGCACCAGGCCAAATGAGAGAACCAAGGGGAAGTGACATAGCAGGAACTACTAGTACCCTGCAGGAACAAATAGGATGGATGACAAATAATCCACCTATCCCAGTAGGAGAAATCTATAAAAGATGGATAATCCTGGGACTAAATAAAATAGTAAGGATGTATAGCCCTACCAGTATTCTAGACATAAAACAAGGACCAAAGGAACCCTTTAGAGACTATGTAGACCGGTTCTATAGAACTCTAAGAGCCGAGCAAGCTTCACAGGAGGTAAAAAATTGGATGACAGAAACTTTGTTGGTCCAAAATGCAAACCCAGATTGTAAAACAATTTTAAAAGCATTGGGACCAGCAGCTACACTAGAAGAAATGATGACAGCATGTCAGGGAGTGGGAGGACCCGGCCATAAAGCAAGAGTGTTGGCTGAAGCAATGAGCCAAGTAACAAATTCAGCTACCATAATGATGCAGAGAGGCAATTTTAGGAACCAAAGAAAGACTGTTAAGTGTTTCAATTGTGGCAAAGAAGGGCACATAGCCAGAAATTGCAGGGCCCCTAGGAAGAAGGGCTGTTGGAAATGTGGAAAGGAAGGACACCAAATGAAAGATTGCACTAATGAAAGGCAGGCTAATTTTTTAGGGAAGATCTGGCCTTCCTCCAAGGGGAGGCCAGGGAATTTTCTTCAGAGCAGGCCAGAGCCAACAGCCCCACCAGAAGAGAGCTTCAGGTTTGGGGAAGAGACAACAACTCCCCCTCAGAAGCAGGAGACGATAGACCAGGAAAAGTATCCCTTAGCTTCCCTCAAATCACTCTTTGGCAGCGACCCCTTGTCACAATAAAGATAGGGGGGCAACTAAAGGAAGCCCTATTAGATACAGGAGCAGATGATACAGTATTAGAAGACATAAATTTACCAGGAAGATGGAAGCCAAAAATGATAGGGGGAATTGGAGGTTTTATCAAAGTAAGACAGTATGATCAGGTATCCATAGAAATCTGTGGCCATAAAGCTGTAGGTACAGTATTAGTAGGACCTACCCCTGTCAACATAATTGGAAGAAACCTGTTGACTCAGATTGGTTGCACCTTAAATTTTCCCATTAGTCCTATTGATACTGTACCAGTAAAATTAAAGCCAGGAATGGATGGCCCAAAAGTTAAACAATGGCCATTGACAGAAGAAAAAATAAAAGCATTAATAGAAATCTGTGCAGAAATGGAAAAGGAAGGGAAAATTTCAAAAATTGGGCCTGAAAATCCATATAATACTCCAGTATTTGCCATAAAGAAAAAAGACAGTACTAAGTGGAGAAAATTAGTAGATTTCAGAGAACTGAATAAGAAAACTCAAGACTTTTGGGAAGTTCAATTAGGAATACCACATCCCGCAGGGTTAAAGAAGAAGAAATCAGTAACAGTACTGGATGTGGGTGATGCATATTTTTCAGTTCCCTTAGATAAGGACTTCAGGAAGTATACAGCATTCACCATACCTAGTATAAACAATGAGACACCAGGGATTAGGTACCAGTACAATGTGCTTCCACAGGGATGGAAAGGATCACCAGCAATATTCCAAAGTAGTATGACAAAAATCTTAGAGCCTTTTAGAAAACAAAATCCAGACATAGTCATCTATCAATACATGGATGATTTGTATGTAGGATCTGACTTAGAAATAGGGCAGCATAGAATAAAAATAGAGGAACTGAGAGACCATCTGTTGAAGTGGGGATTCACCACACCAGACAAAAAACATCAGAAAGAACCTCCATTCCTTTGGATGGGTTATGAACTTCATCCTGATAAATGGACAGTACAGCCTATAGCGCTGCCAGAAAAGGACAGCTGGACTGTCAATGACATACAGAAGTTAGTGGGAAAATTGAATTGGGCAAGTCAGATTTACCCAGGGATTAAAGTAAGACAATTATGTAAACTCCTTAGGGGAACCAAAGCACTAACAGAAGTAGTACCACTAACAGAAGAAGCAGAGCTAGAACTGGCAGAAAACAGGGAGATTCTAAGAGAGCCAGTACATGGAGTGTATTATGACCCATCAAAAGACTTAATAGCAGAAATCCAAAAGCAGGAGCATGGCCAATGGACATATCAAATTTATCAAGAGCCATTTAAAAATCTGAAAACAGGAAAATATGCAAGAATGAGGGGTGCCCACACTAATGATGTAAAACAATTAACAGAGGCAGTGCAAAAAATAGCCAACGAATGCATAGTAATATGGGGAAAGACCCCTAAATTTAGATTACCCATACAAAAAGAAACATGGGAAACATGGTGGACAGAGTATTGGCAAGCCACCTGGATTCCTGAGTGGGAGTTTGTCAATACCCCTCCCTTAGTGAAATTATGGTACCAGTTAGAGAAAGAACCCATAGAAGGAGCAGAAACCTTCTATGTAGATGGGGCAGCTAACAGGGAGACTAAATTAGGAAAAGCAGGATATGTTACTAACAGAGGAAGACAAAAGGTTGTCCCCTTAACTGACACAACAAATCAGAAAACTGAATTACAAGCAATTTATCTAGCTTTGCAGGATTCAGGATCAGAAGTAAACATAGTAACAGACTCACAATATTCATTAGGAATCATTCAAGCACAACCAGATAAAAGTGAATCAGAAATAGTCAGTCAAATAATAGAGCAGTTAATAAAAAAGGAAAAGGTTTACCTAGCATGGGTACCAGCACACAAAGGAATTGGAGGAAATGAACAAGTAGATAAATTAGTCAGTGCTGGAATCAGGAGAGTACTATTTTTAGATGGAATAGATAAGGCCCAAGAAGACCATGAGAAATATCACAGTAATTGGAGAGCAATGGCTAGTGATTTTAACCTGCCACCTATAGTAGCAAAAGAAATAGTAGCCAGCTGTGATAAATGCCAGCTAAAAGGGGAAGCCATGCATGGGCAAGTAGACTGTAGTCCAGGAATATGGCAATTGGATTGTACACATTTAGAAGGAAAGATTGTCCTGGTAGCAGTTCATGTAGCCAGTGGATATATAGAAGCAGAAGTTATTCCAGCAGAAACAGGGCAAGAAACAGCATACTTCATCTTAAAATTGGCAGGAAGATGGCCAGTAAAAACAATACATACAGACAATGGCCCCAATTTCATCAGTACTACGGTTAAGGCCGCCTGTTGGTGGGCGGGAATCAAGCAGGAATTTGGCATACCCTACAATCCCCAAAGTCAAGGAGTAGTGGAATCTATGAATAAAGAATTAAAGAAAATTATAGGACAGGTAAGAGATCAGGCTGAACATCTTAAGACAGCAGTACAAATGGCAGTATTCATCCACAATTTTAAAAGAAAAGGGGGGATTGGGGGGTACACTGCAGGGGAAAGAATAGTAGACATAATAGCAACAGACATACAAACTAAAGAATTACAAAAACAAATTACAAAAATTCAAAATTTTCGGGTTTATTTCAGGGACAACAGAGATCCACTTTGGAAAGGACCAGCAAAGCTCCTCTGGAAAGGTGAAGGGGCAGTAGTGATACAGGATAATAATGAGATAAAAGTAGTGCCAAGAAGAAAAGCAAAGATCATTAGAGATTATGGAAAACAGATGGCAGGTGATGATTGTGTGGCAAGTGGACAGGATGAGGATTAGCACATGGAAAAGTTTAGTAAAACACCATATGTATGTTTCAAAGAAAGCTAAGGGATGGGTTTATAAACATCACTATGAAGGCACTCATCCAAGAATAAGTTCAGAAGTACACATCCCATTAGGAGATGCTAAATTGATAGTGACAACATATTGGGGTCTACATACAGGAGAAAGAGAATGGCATTTGGGTCAGGGAGTCTCCATAGAATGGAGAAAAAGGAGATATAGCACACAAGTAGACCCTGGCCTAGCAGACCAACTAATCCATATGTATTACTTTGATTGTTTTTCAGACTCTGCTATAAGAAGAGCCATAATAGGACATATAGTTAGTCCTAGTTGTGAATATCAGGCAGGACATAACAAGGTAGGATCTCTACAGTATCTGGCACTAGCAGCATTAGTAACACCAAGAAAGATAAAGCCACCCTTGCCTAGTATTGCAAAACTGACAGAGGATAGATGGAACAAGCCCCACAAGACCAAGGGCCACCGAGGGAGCCATACCATGACTGGGCACTAGAGATTTTAGAGGAACTTAAGAATGAAGCTGTTAGACATTTTCCCAGGATATGGCTCCATGACTTAGGGCAGCAGATCTATGAAACTTATGGGGATACTTGGGAAGGAGTGGAAGCCATAATCAGAACTTTGCAACAACTGCTGTTCATTCATTTCAGGATTGGGTGTCAACATAGCAGAATAGGCATTATACCACAGAGAAGAGGGAGAAATGGATCCAGTAGATCCTAACATAGAGCCCTGGAACCAACCAGGAAGTCAGCCTAAAACTGCTTGTAACCAGTGCTATTGTAAACGGTGTTGCTATCATTGCCAAATATGCTTTTTAAAGAAGGGCTTAGGCATTTCCAATGGCAGGAAGAAGAGGAGACCCCGACGAACAACTCCTTACAACAGTGAGAACCATCAAGATCCTCTACGAAAGCAGTGAGTAGTATATGTAATGTCTTTATATATAATATCAATAGTGGCATTAGTAATAGCAGCAATAATAGCAATAGTTGTGTGGTCTATAGTATTCATAGAATATAGAAAAATATTAAGACAAAGAAAAATAGACAGGTTAATTGATAGAATAAGAGACAGAGCAGAAGACAGTGGCAATGAGAGTGAAGGGGATCAGGAAGAGTTGGCAGCTTTTGTGGAGATGGGGCATGATGCTCCTTGGGTTGTTGATGATCTGTAAAGCTGGAGAACAAATGTGGGTCACAGTCTATTATGGGGTACCTGTGTGGAAAGAAGCTACTACCACTCTATTTTGTGCATCAGATGCTAAAGCATATGATACAGAGGCACATAATATTTGGGCCACACATGCCTGTGTACCCACAGACCCCAGCCCACAAGAAGTAGTAATGAACAATGTGACAGAAAATTTCAACATGTGGAAAAATAACATGGTAGAACAGATGCAGGAGGATATAATCAGTTTATGGGATCAAAGCCTAAAGCCATGTGTAAAATTAACTCCACTCTGTGTTACTTTAAATTGCACTGATTTCAATATCACTCGTGCTACCACTAATGGTAGTATAGGACTGGAGGAAACAGGAGAAATAAAAAACTGCTCTTTTAATACCACAGTAATAAAAGATAAAAGGCAGAAAGAATATGCACTCTTTTATAGAACTGATATAGTACCAATAGATAATGAGGGTAATAATAATGCTAGCAATAATACTAGTTATAGGTTGATAAGTTGTAACACCTCAGTCATTACACAGGCCTGTCCAAAAATATCCTTTGAGCCAATTCCCATACATTATTGTGCCCCGGCTGGTTTTGCGATTCTAAAATGTAACAATAAGACGTTTAATGGAAAAGGACCCTGTAAAAATGTCAGCACAGTACAATGTACACATGGAATTAGGCCAGTAGTATCAACTCAACTGCTGCTAAATGGCAGTCTAGCAGAAGGAGATGTAATAATTAGATCTGAAAATTTCACAGATAACGCTAAAAACATAATAGTACAGCTTAATATATCTGTAGAAATTAATTGTACAAGACCCAACAACAATACAAGAAAAAGTATACATATAGCACCAGGGAGAGCATTTTATGCAACAGGAGATATAATAGGAGATATAAGAAAAGCATATTGTAACATTAGTAGAGCAAAATGGAATACCACTTTACAACAGGTAGCTCAAAAATTAGGAGAACAATTTGGGAATGAGAATAAGACAATAGACTTTAATCACCCCACAGGAGGAGACCCAGAAATAGTAATGCATAGTTTTAATTGTGGAGGGGAATTTTTCTACTGTAATTCAACACAATTGTTTAATAGTAGTTGGAAGTATAATAATGGCACTTGGAAGTATAATGATAGTATTTGGAATAGTACTGAAAGTTCAAATAACACTGAAAACATCATGCTCCCGTGCAGAATAAGACAAATTATAAACATGTGGCAGGAAGTAGGAAAAGCAATGTATGCCCCTCCCATCAGAGGACCAATTAGATGTACATCAAATATTACAGGGCTAATATTAACAAGAGATGGTGGCACAAACAACAACACGAAGGAGGTCTTCAGACCTGGAGGAGGAGATATGAGGGACAATTGGAGAAGTGAACTATATAAATATAAAGTAGTACAAATTGAACCATTAGGAATAGCACCCACCAGGGCAAAAAGAAGAGTGGTGCAGAGAGAAAAAAGAGCAGTGGGAATAGGAGCTTTGTTCCTTGGGTTCTTGGGAGCAGCAGGAAGCACTATGGGCGCAGTGTCAATGACGCTGACGGTACAGGCCAGACAATTGTTGTCTGGTATAGTGCAACAGCAGAACAATCTGCTGCGGGCTATTGAGGCGCAACAGCATATGTTGCAACTCACAGTCTGGGGCATCAAGCAGCTCCAGGCAAGAATCCTGGCTGTGGAAAGATACCTACAGGATCAGCAGCTCCTGGGGATTTGGGGTTGCTCTGGAAAACTCATTTGCACCACTGCTGTGCCTTGGAATACTAGTTGGAGTAATAAAACTTACGAAAAGATTTGGAATAACATGACATGGATGGACTGGGATAGAGAAATTAGCAATTACACAGGCCAAATATACACCTTAATTCAAGAATCGCAGAACCAGCAAGAAAAGAATGAAAAAGAATTATTGGAGTTAGATAAATGGGCAAGTTTGTGGAATTGGTTTGACATAACAAATTGGCTGTGGTATATAAAAATATTCATAATGATAGTAGGAGGCTTGATAGGTTTAAGAATAGTTTTTACTGTACTTTCTATAGTGAATAGAGTTAGGCAGGGATACTCACCATTATCGTTTCAGACCCGCCTCCCAGCCCAGAGGGGACCAGACAGGCCCGAAGGAATCGAAGAAGAAGGTGGAGAGCAAGACAGAGACAGATCAGGTCTCTTAGTGAATGGATTCTTAGCACTCATCTGGGTCGACCTACGGAGCCTGTTCCTTTTCAGCTACCGCCGCTTGAGAGACTTACTCTTGATTGTAGCGAGGATTGTGGAACTTCTGGGACGCAGGGGGTGGGAAGCTCTCCAGTATTGGTGGAATCTCATACAGTATTGGATTCAGGAACTAAGGAATAGTGCTATTAGCTTGCTCAACGCCACAGCCATAACAGTAGCTGAGGGGACAGATAGGGTTTTAGAAATATTGCAAAGAGCCGGTAGAGCTATCCTCAACATACCTAGAAGAACAAGACAGGGCCTAGAAAGAGCATTGGTATAAAATGGGTGGCAAATGGTCAAAAAGTAGTTTGGTTGGATGGCCTAGGATAAGGGACAGAATGAGAAGAACTGAGCCGGAGCCAGCGGCAGTTGGGGTGGGAGCAGTATCTCGAGATCTGGAAAAACATGGAGCAATCACAAGTAGCAATACAGCAGCTACCAATGCTGAGTGTGCCTGGCTAGAAGCACAAGAGGAGGA
>C.ZA.04.SK143B1_AY703910_D.ZA.86.R482_AY773341
TCTGTTGTGTGACTCTGGTAACTAGAGATCCCTCAGACCCTTGTGGTAGTGTGGAAAATCTCTAGCAGTGGCGCCCGAACAGGGACCTGAAAGCGAAAGTAAGACCAGAGGAGATCTCTCGACGCAGGACTCGGCTTGCTGAAGTGCACTCGGCGAGAGGCGAGAGCGGCGGCTGGTGAGTACGCCAATTTTTATTTGACTAGCGGAGGCTAGAAGGAGAGAGATGGGTGCGAGAGCGTCAATATTAAGAGGGGGAAAATTAGATAAATGGGAGAAAATTAGGTTAAGGCCAGGGGGAAAGAAAAGATATAGGTTAAAACATTTAGTATGGGCAAGCAGGGAGCTGGAAAGATTTGCACTTAACCCTGGCCTTTTAGAAACATCAGATGGCTGTAAACAAATAATACAACAGCTACAACCAGCTCTTCAGACAGGAACAGAGGAACTTAGATCATTATACAACACAATAGCAACTATCTATTGTGTACAAAAAGGGATAGATGTAAAAGACACCAAGGAAGCTTTAGAAAAAATAGAGGAAGAACAAAACAAAAGTAAGAAAAAGAAGGCACAGCAAGCAGAGGCTGACACAGGGAACAGCAGTCAGGTCAGCCAAAATTATCCTATAGTGCAGAACCTACAGGGGCAAATGGTACATCAGGCCATATCACCTAGAACTTTGAATGCATGGGTAAAAGTAATAGAAGAAAAGGCCTTCAGCCCAGAAATAATACCCATGTTTTCAGCATTATCAGAGGGAGCCACCCCACAAGATTTAAACACCATGCTAAATACAGTGGGGGGACATCAAGCAGCCATGCAAATGCTAAAAGATACCATTAATGAGGAGGCTGCAGAATGGGATAGATTACATCCAATACATGCAGGGCCTGTTGCACCCGGCCAAATGAGAGAACCAAGGGGAAGTGACATAGCAGGAACTACTAGTACCCTTCAGGAACAAATAGCATGGATGACAAGTAACCCACCTATTCCAGTGGGAGACATTTATAAAAGATGGATAATTCTGGGGCTAAATAAAATAGTAAGAATGTATTGCCCTGTCAGCATTTTGGACATAAGACAAGGACCAAAGGAACCCTTTAGAGACTATGTAGACCGGTTCTTTAAGGTTTTAAGAGCTGAACAAGCTACACAAGATGTAAAAAACTGGATGACAGATACCTTGTTAGTCCAAAATGCGAACCCAGATTGTAAGACCATTTTAAAGGCATTAGGAACAGGGGCTACACTAGAAGAAATGATGACAGCATGTCAGGGAGTGGGAGGGCCTGGCCACAAAGCAAGAGTTTTGGCTGAGGCAATGAGCCACGCAAACAATATACACATAATGATGCAGAGAAACAATTTTAAAGGCTCTAGAAAACCTGTTAAATGTTTTAACTGTGGCAAAGAAGGGCACATAGCCAGAAATTGCAAGGCCCCTAGAAAAAAGGGCTGTTGGAAATGTGGAAAAGAAGGACACCAAATGAAAGACTGTACTGAAAGGCAGGCTAATTTTTTAGGGAAAATATGGCCTTCCCACAAGGGGAGGCCAGGGAATTTCCTTCAGAGCAGACCAGAGCCAACAGCCCCACCAGCAGAGAGCTTCAAGGTCGAGGAAATAACCCCCGCTCCGAAGCAGGAGATGAAAGACAGGGAGCCTTTAACTTCCCTCAGATCACTCTTTGGCAGCGACCCCTTGTCCCAATAAAAGTAGGGGGTCAAATAAGGGAGGCTCTCTTAGATACAGGAGCAGATGATACAGTATTAGAAGATATAAATTTGCCAGGAAAATGGAAACCAAAAATGATAGGAGGAATTGGAGGCTTTATCAAAGTAAGACAGTATGATCAAATACTTATAGAAATTTGTGGAAAAAAGGCTATAGGTACAGTATTAGTGGGACCTACACCTGTCAACATAATTGGAAGAAATATGTTGACTCAACTTGGATGTACACTAAATTTTCCAATTAGTCCCATTGAAACTGTACCAGTAAAATTAAAGGCAGGAATGGATGGCCCAAAGGTTAAACAATGGCCATTGACAGAAGAAAAAATAAAAGCATTAACAGCAATTTGTGAAGAAATGGAGAAGGAAGGAAAAATTACAAAAATTGGACCTGAAAATCCATATAACACTCCAGTATTTGCCATAAAAAAGAAGGACAGTACTAAGTGGAGAAAATTAGTAGATTTCAGGGAACTCAATAAAAGAACTCAAGACTTTTGGGAAGTTCAGTTAGGAATACCACACCCAGCAGGGTTAAAAAAGAAAAAATCAGTGACAGTGCTGGATGTGGGGGATGCGTATTTTTCAGTTCCTTTAGATGAAAGCTTCAGGAGATATACTGCATTCACCATACCTAGTATAAACAATGAAACACCAGGGATTAGATATCAATATAATGTGCTTCCACAAGGATGGAAAGGATCACCAGCAATATTCCAGAGTAGCATGACAAAAATCTTAGAACCCTTTAGAGCAAAAAACCCAGAAATAGTTATCTATCAATATATGGATGACTTATATGTAGGGTCTGATTTAGAAATAATGCAACATAGAGCAAAAATAGAGGAGTTAAGAAACCACCTATTGAAATGGGGATTTACCACACCAGACAAGAAGCATCAGAAAGAACCCCATTTCTTTGGATGGGTTATGAACTCCATCCTGACAAATGGACAGTACAACCTATACAGCTGCCAGACAAGGATAGCTGGACTGTCAATGATATACAGAAGTTAGTGGGAAAATTAAACTGGGCAAGTCAGATTTACCCAGGGATTAGAATAAAACAATTGTGCAAGCTACTTAGGGGAGCCAAAGCACTAACAGACATAGTACAACTGACTGAAGAAGCAGAATTAGAATTGGCAGAGAATAGAGAAATTCTAAAAGAACCAGTACATGGAGTATATTATGACCCATCAAAAGAATTAATAGCGGAGATACAGAAACAGGGGCGTGACCAATGGACATACCAAATTTACCAAGAACCATTCAAAAATCTGAAAACAGGGAAGTATGCAAAAATGAGGACTGCCCACACTAATGATGTAAAACAGTTAACAGAGGCAGCGCAAAAAATAGCCATGGAAAGTATAGTAATATGGGGAAAGACTCCTAAATTTAGACTACCCATCCAAAAAGAAACATGGGAGACATGGAGGACAGACTATTGGCAAGCCACCTGGATCCCTGAGTGGGAGTTTGTTAATACTCCTCCCCTAGTAAAATTATGGTACCAGCCGGAGAAAGAACCCATACCAGGAGCAGAAACTTTCTATGTAGATGGAGCATATAATAGGGACACCAAAACAGGAAAAGCAGGGTATGTTACTGACAGAGGAAGGCAAAAAATTGTTCCTTTGACTGAAACAACAAATCAAAAGGCTGAGTTACAAGCAATTCAACTAGCTTTGCAGGAATCAGGACCAGAAGTAAATATAGTAACAGACTCACAGTATGCATTAGGGATCATTCAAGCACAACCAGATAAGAGTGAATCAGAGTTAGTTAACCAAATAATAGAACAGCTAATAAACAAGGAAAGAATCTACCTATCATGGGTACCAGCACATAAAGGAATTGGAGGAAATGAACAAGTAGATAAATTAGTAAGCAAGGGAATCAGAAAAGTGCTGTTTCTAGATGGAATAGATAAGGCTCAAGAAGACCATGAAAAATATCACAGCAATTGGAGAGCAATGGCTAATGATTTTAATCTGCCACCCATAGTAGCAAAAGAAATAGTAGCCAGCTGTGATAAATGTCAACTAAAAGGGGAAGCCATACATGGACAAGTAGACTGTAGTCCAGGGATATGGCAATTAGATTGTACACATTTAGAAGGAAAAGTCATCCTGGTAGCAGTCCATGTAGCCAGTGGCTACATGGAAGCAGAGGTCATCCCAGCAGAAACAGGGCAAGAAACAGCATACTATATATTAAAATTAGCAGGAAGATGGCCAGTCAAGGTAATACATACAGACAATGGCAGTAATTTCACCAGTGCTGCAGTTAAGGCAGCCTGTTGGTGGGCAGGTATCCAACAGGAATTTGGAATTCCCTACAATCCCCAAAGTCAGGGAGTAGTAGAATCCATGAATAAGGAATTAAAGAAAATCATAGGGCAGGTAAGAGACCAAGCTGAGCACCTTAAGACAGCAGTACAAATGGCAGTATTCATTCACAATTTTAAAAGAAAAGGGGGGATTGGAGGGTACAGTCCAGGGGAAAGAATGATAGACATAATAAAGAATGATAGACATAATAGCAACAGATATACAAACTAAAGAATTACAAAAACAAATTATAAAAATTCAAAATTTTCGGGTTTATTACAGAGACAGCAGAGACCCTATTTGGAAAGGACCAGCCAAACTACTCTGGAAAGGTGAAGGGGCAGTAGTGATACAAGATAATAGTGACATAAAGGTAGTACCAAGGAGGAAAGCAAAAATCATTAAAGACTATGGAAAACAGATGGCAGAGGCTGATTGTATGGCGGGTAGACAGGATGAAGATCAGAACATGGAATAGTTTGGTAAAGCATCATATGTATGTCTCAAAGAGGGCTAGTAGATGGTTCTATAGACATCATTTTGAAAGCAGGAATCCAAAAATAAGTTCAGAAGTACACATTCCATTAGGGGATGCTACACTAGTAATAAAAACATATTGGGGTTTGCAGACAGGAGAAAGAGAGTGGCATCTGGGTCATGGAGTCTCCATAGAATGGAGATTGAGAAGATATAACACACAAGTAGACCCTAGCCTGGCAGACCAGCTAATCCATAAACATTATTTTGATTGTTTTACAGAATCTGCCATAAGACAAGCCATATTAGGACACATAGTTATTCCTAGGTGTGACTATCCAGCAGGACATAATAAGGTAGGATCTCTACAATACTTGGCACTGACAGCACTAATAAAACCAAAGAAGAGAAAGCCACCTCTGCCTAGTGTTAGGAAATTAGTAGAGGATAGATGGAACAACCCCCAGAAGACCAGGGGCCGCAGAGGGAACCACACAATGAATGGACGCTAGAGCTTCTAGAGGAACTCAAGCAGGAAGCTATCAGACACTTTCCCAGAGCATGGCTCCATGGCTTGGGACAACATATATATGAAACCTATGGAGATACTTGGGCGGGAGTTGAAGCTATAATAAGAATTCTGCAACAACTACTGTTTATTCATTTCAGAATTGGGTGCCAGCACAGCAGAATAGGCATTATAATGCGACAGAGAAGAGCAAGAAATGGAGCCAATAGATCCTAACCTAGAGCCCTGGAACCATCCAGGAAGTCAGCCTAAAACTGCTTGCAATAAGTGCTTTTGTAAATATTGTAGCTATCATTGTCTAGTTTGCTTTCAGACAAAAGGCTTAGGCATTTCCTATGGCAGGAAGAAGCGGAGACAACGACGAAGCGCTCCTCCGAGCAGTGAGGATCATCAAAATCTTATATCAAAGCAGTAAGTAATAAGTAGTAGATGTAATGCTAAGTTTAGTAGAACGAGTAGATTATAGATTAGGAGTAGGAGCATTGATAGTAGCATTAATCTTAGCAATAATTGTGTGGATCATAGCATATATAGAATATAGGAAATTGGTAAGACAAAAAAAAATAAACTGGTTAATTGAGAGAATTAGGGAAAGAGCAGAAGACAGTGGCAATGAGAGTGATGGGGACACTGAGGAATTATCAACAATGGTGGAGGTGGGGAATCTTGGGCTTTTGGATGCTAATTAGTTGTAATGTGGGAGGAAACTTGTGGGTCACAGTCTATTATGGGGTACCTGTGTGGAAAGAAGCAAAAACTACTTTATTCTGTGCATCAGATGCTAAAGCATATGATAGGGAGGTGCATAATGTCTGGGCTACACATGCCTGTGTACCCACAGACCCCAACCCACAAGAAATAATTTTGGGAAATGTAACAGAAAATTTTAACATGTGGAAAAATGACATGGTGGAGCAGATGCATGAGGATATAATCAGTTTATGGGATCAAAGCCTAAAGCCATGTGTAAAGTTGACCCCACTCTGTGTCACTTTAAATTGTACAAATGTTACCAGAAATAGTAATGTTACCGTCAATAATACCATGAAGGAAGAAATAAGAAATTGCTCTTTCAATACAACCACAGAACTAAGAGATAAGAAAAAGACTGCATATGCACTTTTTTATAGGCTTGATCTAGTACCACTTACTAAGAATGAGAGCAACTTTACTGAGTATAGATTAATAAGGTGTAATACCTCAACCATAACACAAGCCTGTCCAAAGGTCACTTTTGACCCAATTCCTATACATTATTGTGCCCCAGCTGGTTATGCGATTCTAAAATGCAATAATAATACATTCAGTGGACAAGGACCATGCACTAATGTCAGCACAGTACAATGTACACATGGAATTAAGCCAGTAGTATCAACTCAATTACTGTTAAATGGTAGTCTAGCAAAAGAAGGGATAGTAATTAGATCTGAAAACCTGACAAATAATGTCAAAACAATAATAGTACAGTTTAACAATTCTGTACAAATTGTGTGTACAAGGCCCAACAATAATACAAGGACAAGTGTGAGGATAGGCCCAGGACAAACATTCTATGCAACAGGAGACATAATAGGAAATATAAGACAGGCACATTGCAACATTAGTGAAGGAGATTGGAATAAGACTCTACAAGGAGTAAAAGAAAAATTAGGAAAATACTTCCCTAATAAAACAATAACTTTTGCACCATCTGTAGGTGGGGACCTAGAAATTACAACACATAGCTTTAATTGTAGAGGAGAGTTTTTCTATTGTAATACATCAAAACTGTTTAATAATAATAGCACAAACAGCACTTCAAATGGAACCATCACACTCCCATGCAGAATAAGACAAATTATAAACATGTGGCAGGGAGTAGGACGGGCAATGTATGCCCCGCCCATTGCAGGAAACATAACATGTACGTCAAATATTACAGGACTACTACTGACACGTGATGGAGGAAATAACGAAACAGAGACAGAAACATTCAGACCTGGAGGAGGAGATATGAGGGACAATTGGAGAAGTGAGTTATATAAATACAAAGTGGTAGAAATTAAGCCATTAGGAATAGCACCTACTAGGGCAAAAAGGAGAGTGGTGGAGAGAGAAAAAAGAGCAGCAATAGGAGCTGTGTTCCTTGGGTTCTTGGGAGCAGCAGGAAGCACTATGGGCGCAGCATCAATAACGCTGACGGTACAGGCCAGACAATTGTTGTCTGGTATAGTGCAACAGCAAAGCAATTTGCTGAGGGCTATAGAGGCGCAACAGCATATGTTGCAACTCACGGTCTGGGGCATTAAGCAGCTCCAGACAAGAGTCCTGGCTATAGAAAGATACCTAAAGGATCAACAGCTCCTAGGGATTTGGGGCTGCTCTGGAAAACTCATCTGCACCACTGCTGTGCCTTGGAACTCCAGTTGGAGTAATAGATCTGAAACAGACATTTGGGATAACATGACTTGGATGCAGTGGGATAGAGAAATCAATAATTACACAGACATAATATACAGGTTGCTTGAAGAATCGCAAAACCAGCAAGAAGAAAATGAAGAAGATTTACTAGCATTGGACAGTTGGAGCAATCTGTGGAATTGGTTTAAAATAACAACATGGCTGTGGTACATAAAAATATTCATAATGATAGTAGGAGGCTTAATAGGGTTAAGAATAATTTTTGCTGTGATCTCTATAGTGAATAGAGTTAGGCAGGGATACTCACCTTTGTCGTTTCAGACCCTTATCCCAAACCCGAGGGGACCCGACAGGCGCGGAAGAATCGAAGGAGAAGGTGGAGAGCAAGACAGCGACAGATCCATTCGCTTAGTGAGCGGATTCTTAGCTCTTGCCTGGGACGATCTGAGGAGCCTGTGCCTTTGCAGCTACCACCTATTGAGAGACTTCATATTGGTGATAGCGAGGGCGGTGGAACTTCTGGGACGCAACAGTCTCAGAGGAATACAGAGGGGTTGGGAAGCCCTTAAGTATCTGGGAAGTCTTGTGCAGTATCGGGGTCTGGAACTAAAAAGGAGTGCTATTAGTCTGTTTGATACCATAGCAATCACAGTAGCTGAAGGAACAGATAGAATTCTAGAATTAGGACAAGGAATTTGTAGAGCTATCTGCAACATACCTACAAGAATCAGACAGGGCTTAGAAGCAGCGTTGCAATAAAATGGGGGGCAAGTGGTCAAAAAGCAGTTTAGTTGGGTGGCCTGCAGTAAGAGACAGAATGAAGAGAACTGATCCAAAAAGAAATGATCCAGCAGCAGTAGGAGTAGGAGCAGCGTCTCAAGACTTAGATAAATATGGGGCACTTACAAGCAGCAACACAGCTGCCACTAATGCAGATTGTGCCTGGCTGGAAGCACACGAAGAGGAAGAAGAAGTAGGCTTTCCAGTCAGACCTCAGGTGCCTTTAAGACCAATGACTTATAAGGGAGCATTCGATCTCAGCTTCTTTTTAAAAGAAAAGGGGGGACTGGAAGGGTTAATTCACTCTAAGAGAAGACAAGACATCCTTGATTTATGGGTCTATCATACACAAGGCTTCTTCCCTGATTGGCAAAACTACACACCGGGACCAGGGGTCAGATACCCACTGACCTTTGGATGGTGCTTCAAGCTAGTGCCAGTCGACCCACGGGAAGTAGAAGAGGCCACTGAAGGAGAAAACACCTGTCTACTACACCCTATAAGCCAGCATGGAATAGAGGATGCAGACGGAGAAGTATTAAGATGGGAGTTTGACAGTCAACTAGCGCGCAGACACATGGCCCGCGAGCTACATCCGGAGTATTACAAAGACTGCTGACACAGAAGGGACTTTCCGCTGGGACTTTCCACTGGGGCATGCCAGGAGGAGTGGTCTGGGCGGGACAGGGGAGTGGCCAGCCCTCAGATGCTGCATATAAGCAGCTGCTTTTCGCCTGTACTGGGTCTCTCTAGGTAGACCAGATCTGAGCCTGGGAGCTCTCTGGCTATTTAGGGAACCCACTGCTTAAGCCTCAATA
>C.ZA.04.04ZASK173B1_DQ093604_F1.FI.93.FIN9363_AF075703
TCTGTTGTGTGACTCTGGTAACTAGAGATCCCTCAGACCCTTTGTGGTAGTGTGGAAAATCTCTAGCAGTGGCGCCCGAACAGGGACCTGAAAGCGAAAGTAAGACCAGAGGAGATCTCTCGACGCAGGACTCGGCTTGCTGAAGTGCACTCGGCAAGAGGCGAGAGCGGCGGCTGGTGAGTACGCCAATTTCTATTTGACTAGCGGAGGCTAGAAGGAGAGAGATGGGTGCGAGAGCGTCAGTATTAAGAGGCGAAAAATTAGATTCATGGGAAAAAATTAGGTTAAGGCCAGGGGGGAAAAAACAGTATAGGTTAAAACACATAGTATGGGCAAGCAGGGAGCTGGAAAGATTTGCACTTAACCCTGGCCTTTTGGAGACATCAGAAGGCTGTAAACAGATAATGAGTCAGCTACAACCAGCTATTCAGACAGGAACAGAGGAACTTAGATCATTATTCAACACAGTAGCAACTCTCTATTGTGTACATAAAAGGATAAAGATACAAGACACCAAGGAAGCCTTAGACAAGGTAGAGGAAGAGCAAAACAAAAGTCAGCAAAAAACACAGCAGGCAGAAGCGGCTGCCGGAAAGATCAGTCAAAATTATCCTATAGTGCAGAACCTCCAAGGGCAAATGGTACACCAGGCCATATCACCTAGAACCTTGAATGCATGGGTAAAAGTAATAGAAGAAAAAGCTTTTAGCCCGGAGGTAATACCCATGTTTACAGCATTATCAGAAGGGGCCACCCCACAAGATTTAAATACCATGTTAAATACAGTGGGGGGACATCAAGCAGCCATGCAAATGTTAAAAGATACCATCAATGAGGAGGCTGCAGAGTGGGATAGGTTACATCCAGTACAAGCAGGGCCTATTGCACCAGGCCAAATAAGAGAACCAAGGGGAAGTGACATAGCAGGAACTACTAGTACCCTTCAGGAACAAATAACATGGATGACAAGTAACCCACCTATCCCAGTGGGAGACATCTATAAAAGGTGGATAATTATGGGGTTAAATAAAATAGTAAGAATGTATAGCCCTGTCAGCATTTTAGACATAAGACAAGGGCCAAAGGAACCCTTTAGAGATTATGTGGACCGGTTCTTTAAAACTTTAAGAGCTGAACAAGCCACACAAGATGTAAAAAATTGGATGACAGACACCTTGCTGGTCCAAAACGCGAACCCAGATTGTAGGACCATTTTAAAAGCATTAGGACCAGCGGCTTCATTAGAAGAAATGATGACAGCATGTCAGGGAGTGGGAGGACCTGGCCACAAAGCAAGAGTGTTGGCTGAGGCAATGAGCCAAATGAACAGTACAGGTGTACTAATGCAGAGAAGCAATTTCAAAGGCCCTAAAAGAAGTATTAAATGTTTCAACTGTGGCAAGGAGGGGCACTTAGCCAGAAATTGTAGGGCCCCTAGGAAGAAAGGCTGTTGGAAATGTGGAAAGGAAGGACATCAAATGAAAGACTGTACTGAGAGACAGGCTAATTTTTTAGGGAAGATTTGGCCTTCCCACAAGGGAAGGCCAGGGAATTTCCTTCAGAACAGACCAGAGCCAACAGTCCCAACAGCCCCACCAGCAGAGAGCTTCAAGTTCGAGGAGACAACCCCTGCTCCGAAGCAGGAGCCGAAGGACAGGGAACCCTTAATTTCCCTCAAATCACTCTTTGGCAGCGACCCCTTGTCCCAATAAAAGTAGGGGGCCAAATAAAGGAGGCTCTCTTAGACACAGGAGCAGATGATACAGTATTAGAAGAAATGAGTTTGCCAGGAAAATGGAAACCAAAAATGATAGGAGGAATTGGAGGTTTTATCAAAGTAAGACAGTATGAGCAAATACCTATAGAAATTTGTGGAAAAAAGGCTATAGGTACAGTATTAATAGGACCTACACCTGTCAACATAATTGGAAGGAACATGTTGACTCAGCTTGGATGCACACTAAATTTTCCAATTAGTCCTATTGAAACTGTGCCAGTAAAATTAAAGCCAGGAATGGATGGCCCAAAGGTTAAACAATGGCCATTGACAGAAGAAAAAATAAAAGCATTAACAGCAATTTGTGATGAAATGGAAAAGGAAGGAAAAATTACAAAAATTGGGCCTGAAAATCCATATAACACTCCAATATTTGCCATAAAAAAGAAGGACAGTACTAAGTGGAGAAAATTAGTAGATTTCAGGGAACTTAATAAAAGAACTCAAGACTTTTGGGAAGTTCAATTAGGAATACCACACCCAGCAGGGTTAAAAAAGAAAAAATCAGTGACAGTACTGGATGTGGGGGATGCATATTTTTCAGTTCCTTTAGATGAAAACTTCAGGAAATATACTGCATTCACCATACCTAGTATAAACAATGAAAAACCAGGGATTAGATATCAATATAATGTGCTTCCACAGGGATGGAAAGGATCACCAGCAATATTCCAGTGGAGCATGACAAAAATCTTAGAGCCCTTCAGAGCAAGAAATCCAGACATAGTTATCTACCAATACATGGATGATTTGTATGTAGGGTCTGACTTAGAAATAGGGCAGCATAGAACAAAAATAGAGGAGTTAAGAGAACATCTACTGAAATGGGGATTTACTACACCAGACAAAAAACATCAGAAAGAACCTCCATTCCTCTGGATGGGGTATGAACTCCATCCTGATAAATGGACAGTGCAGCCTATACAATTGCCAGACAAGGACAGCTGGACTGTCGATGATATACAGAAGTTAGTGGGAAAATTAAATTGGGCCAGTCAGATTTACCCAGGGATTAAAGTAAGGCAACTTTGTAAACTCCTTAGGGGGACCAAAGCGCTAACAGACATAGTACCACTAACTGAAGAAGCAGAATTAGAATTGGCAGAGAACAGGGAAATTCTAAAAGAACCAGTACGTGGGGTATATTATGACCCATCAAAAGACCTGATAGCTGAAATACAGAAACAGGGGCATGACCAATGGACATATCAAATTTACCAAGAACCATTCAAAAATCTGAAAACTGGGAAATATGCAAAAATGAGGACTGCCCACACAAATGATGTAAGACAGTTAGCAGAGGCAGTGCAAAAAATATCCATGGAAAGCATAATAATATGGGGAAAGACTCCTAAATTTAGACTACCCATCCAAAAAGAAACATGGGAGACATGGTGGACAGACTATTGGCAAGCCACCTGGATTCCTGAGTGGGAGTTTGTTAATACCCCTCCCCTAGTAAAATTATGGTACCAGCTGGAGAAAGAACCCATAATAGGAGCAGAAACTTTCTATGTAGATGGAGCAGCTAACAGGGAAACTAAAATAGGAAAAGCAGGGTATGTCACTGACAAAGGAAGGCAGAAAATTGTTTCTCTAACTGAAACAACAAATCAGAAGACTGAATTGCAAGCAATTCATCTAGCTTTGCAAGATTCAGGATCAGAAGTAAACATAGTAACAGACTCACAGTATGCATTAGGGATCATTCAAGCACAACCAGATAAGAGTGAATCAGAATTAGTCAACCAAATAATAGAACAATTAATAAAAAAGGAAAGGGTCTACCTGTCATGGGTACCAGCACATAAAGGAATTGGAGGAAATGAACAAGTAGATAAATTAGTAAGTAGTGGAATCAGGAAAGTGCTATTTCTAGATGGAATAGACAAGGCTCAAGAAGAGCATGAAAAATATCACAGCAATTGGAGAGCAATGGCTAGCGAGTTTAATCTGCCACCCATAGTAGCAAAAGAAATAGTAGCTAGCTGTGATAAATGTCAGGTAAAAGGAGAAGCCATACATGGACAAGTAGACTGTAGTCCAGGAATATGGCAATTAGATTGTACACATTTAGAAGGAAAAATCATCCCGGTAGCAGTCCATGTAGCCAGTGGCTACATAGAAGCAGAAGTTATCCCAGCAGAAACAGGACAAGAAACAGCATACTATATACTAAAGTTAGCAGGAAGATGGCCAGTCAAAGTAATACACACAGACAATGGCAGTAATTTCACCAGTGCTGCAGTTAAGGCAGCCTGTTGGTGGGCAGGTATCCAACAGGAATTTGGAATTCCCTACAATCCCCAAAGTCAGGGAGTAGTAGAATCCATGAATAAAGAATTAAAGAAAATCATAGAGCAGGTAAGAGATCAAGCTGAGCACCTTAAGACAGCGGTACAAATGGCAGTATTCATTCACAATTTTAAAAGAAAAGGGGGGATTGGGGGGTACAGTGCAGGGGAAAGAATAATAGACATAATAGCAGCAGACATACAAACTAAAGAATTACAACAACAAATTACAAAAATTCAAAATTTTCGGGTTTATTACAGAGACAGCAGAGACCCTATTTGGAAAGGACCAGCCAAACTACTCTGGAAAGGTGAAGGAGCAGTAGTAATACAAGATAATAGTGACATAAAGGTAGTACCAAGGAGGAAAGCAAAAATCATTAGGGACTATGGAAAACAGATGGCAGGCGCTGATTGTGTGGCAGGTAGACAGGATGAAAATTAGAACATGGAACAGTTTAGTAAAACACCATATGTATATTTCAAAGAGAGCTAATAAATGGTTTTACAGACATCATTTTGAAAGCAGACATCCAAAAGTAAGTTCAGAAGTACACATCCCATTAGGGGAGGCTAGATTAGTAATAATAACATATTGGGGGTTGCAAACAGGAGAAAGAGAGTGGCATTTGGGTCATGGAGTCTCCATAGAATGGAGATGGAGAAGATATAGCACACAAGTAGACCCTGGCCTGGCAGACCAGCTAATCCACATGCATTATTTTGATTGTTTTGCAGAGTCTGCCATAAGGAGAGCCATATTAGGACACATAGTTATTCCTAGGTGTGACTATCAAGCAGGACATAATAAGGTAGGATCTTTACAATATTTGGCACTGACAGCATTGATAAAACCAAAAAGGAGAAAGCCACCTCTGCCTAGTGTTAGGAAATTAGTAGAGGATAAATGGAACAAGCCCCAGAAGACCAGGGGCCGCAGAGGGAACCATACAATGAATGGACACTAGAGATTTTAGAGGAACTCAAGCAGGAAGCTGTCAGGCACTTTCCTAGACCATGGCTTCATAACTTAGGACAATATATCTATGAAACCTATGGAGATACTTGGACAGGAGTTGAAGCTCTAATGAGAATACTGCAACAACTATTGTTTACTCATTTCAGAATTGGGTGCTCACATAGCAGAATAGGCATTATACGACAAAGAAGAGCAAGAAATGGAGCCAGTAGATCCTAAACTAGAGCCCTGGAACCATCCAGGAAGTCAACCTAAAACCCCTTGTAATAATTGCTACTGCAAATATTGCAGCTATCATTGTCTAGCTTGCTTTCAGAAAAAAGGCTTAGGCATTTCCTATGGCAGGAAGAAGCGAGGACCGCGACGACGCACTCCTCCAAGCAATAAGGACCATCAAGATCTTATACCAAAGCAGTAAGTATATGTAATGCTGAATTTACTAGAAAAAGTAGATTATAGAATAGCAGTAGCAGCACTTACAGTGGCACTAATCCTAGCAATAGTTGTGTGGAGCTTAGCATATAGAGAATATAGGAAATTGTTAAAACAAAAGAAAATAGACTGGTTAATTAAAAGAATTAGGGAAAGAGCAGAAGACAGTGGCAATGAGAGTGAGGGAGATACTGAGGAATTATCAACAATGGTGGATATGGGGCATCTTAGGCTTTTGGATGTTAATGATTTGTAATGTGGTAGGAAACTTGTGGGTCACAGTCTATTATGGGGTACCTGTGTGGAAAGAAGCAAAAACTACTCTATTCTGTGCTTCAGATGCTAAAGCATATGACACAGAAGTGCATAATATCTGGGCTACACACGCCTGTGTACCCACAGACCCCAACCCACAAGAATTACTTTTGGAAAATGTAACAGAAAATTTTAACATGTGGAAAAATGACATGGTGGATCAGATGCATGAGGATGTAATCAGTTTATGGGATGAAAGCCTAAAGCCATGTGTAAAGTTAACCCCACTATGTGTCACTTTAAAATGTATAAATACTACTAGAAATGCTAGTGTTACTGTGAATGGTACTGCTGCTGAAGAAATGAAAAATTGCTCTTTCAATGTGACCACAGAACTAAGAGATAAGAAACGGAACGTGTATGCACTTTTTTATAAACTTGATATAGTACCACTTAAGGGCAGCAACTCTAGTGAGTATATATTAATAAATTGTAATACCTCAACCATAGCACAAGCCTGTCCAAAGGTCTCTTTTGACCCAATTCCTATACATTATTGTGCTCCAGCTGGTTATGCGATTCTAAAGTGTAATAATAAGACATTCAATGGGACAGGACCATGTCAGAATGTTAGCACAGTACAATGTACACATGGAATTAAGCCAGTGGTATCAACTCAACTACTGTTAAATGGTAGCCTAGCAGAAGAGATAATAATTAGATCTGAAAACTTGACAAACAATGCCAAAACAATAATAGTACATCTTAATGAGACTGTAAACATTACGTGTATAAGACCCGGCAATAATACAAGAAAAAGTATAAGGATAGGACCAGGACAAACATTCTATGCAACAGGAGACATAATAGGAGACATCAGAAAAGCACATTGTAACATTAGTGCAAGTGAATGGAGTAGAACTTTACAGGGGGTAAGTAAAAAGTTAAGAGAATACTTCCCTAATAAAACAATAGTATTTAATTCATCTTCAGGAGGGGACCTAGAAATTACAACACATAGCTTTAATTGTGGAGGAGAATTTTTCTATTGCAATACATCAAGCCTGTTCAATAGCAGTTATAATGGCACAAATAATAGTAGTTACAATAGTACAGGAGACATCACACTCCCATGCAGAATAAAACAAATTATAAACATGTGGCAGAAGGTAGGACGAGCAATATATGCCCCTCCCATTGCAGGAAACATAACATGTAATTCAACTATCACTGGACTACTCTTGGTAAGAGATGGAGGCAACTCAAATAACCTAAGTGAGACATTCAGACCAGCAGGAGGAAATATGAAGGATAATTGGAGAAGTGAACTATATAAATATAAAGTGGTAGAAATTAAGCCATTGGGAATAGCACCCACTAAGGCAAAAAGGCGAGTGGCGGAGAGAGAAAAAAGGGCAGTAGGAATAGGAGCTGTGTTCCTTGGGTTCTTGGGAGCAGCAGGAAGCACTATGGGCGCAGCGTCAATAGCGCTGACGGCACAGGCCAGACAAGTGTTGTCTGGAATAGTGCAACAGCAAAGCAATTTGCTGAGGGCTATAGAGGCGCAACAGCATATGTTGCAACTCACAGTCTGGGGCATTAAGCAGCTCCAGGCAAGAGTCCTGGCTATAGAAAGATACCTACAGGATCAACAGCTCCTAGGGATTTGGGGCTGCTCTGGAAAACTCATCTGCACCACTACTGTGCCTTGGAACTCCAGTTGGAGTAATAAATCTCAAGAAGAAATTTGGCAAAACATGACCTGGATGCAGTGGGATAGAGAAATTGAGAAATGCACAGGAATAATATACAGGTTGCTTGGAGACTCGCAAATCCAGCAGGAGAAAAATGAAAAGGACTTATTAGCACTGGACAGTTGGAAAAATTTGTGGAGTTGGTTTAACATATCAAATTGGCTGTGGTATATAAAAATATTCATAATGATAGTAGGAGGCTTAATAGGCTTGAGAATAATTTTTGCTGTGCTTTCTATAGTGAATAGAGTTAGGCAGGGATACTCACCTTTGTCGTTCCAGACCCTTACCCCGAACCCAAGGGAACTCGACAGGCTCGGAAGAATCGAAGAAGAAGGTGGAGAGCAAGACAGAGACAGATCGATTCGATTAGTGCACGGATTCTTAGCACTTATCTGGGACGACTTGAGGAACCTGTGCCTCTTCAGCTACCACCGATTGAGAGACTTAACATTGGTGACAGCGAGAGCGGTGGAACTTCTGGCACGCAGCAGTCTCAAGGGACTACAGAGGGGGTGGGAAGCACTTAAGTATTTGGGAAGTCTTGTGCAGTATTGGGGTCTGGAACTAAAAAAGAGTGCTATTAGTCTGTTTGATACCATAGCAATAGCAGTAGCTGAAGGAACAGATAGAATTATAGAATTAGTACAAAGAATTGGTAGAGCTATCTACAACATACCTAGAAGAATAAGACAGGGCTTTGAAGCAGCTTTGCAATAAAATGGGGGGCAAGTGGTCAAAAAGCAGTATAGTTGGATGGCCTGCTGTAAGAGAAAGAATAAGAAGAACTGAGCCAGCAGCAGAGGGAGTAGGAGCAGCGTCTCAAGACTTAGATAAACATGGAGCACTTACAAGCAGCAACACAGCTGCCACTAATGCTGCTTGTGCCTGGCTAGAAGCACAAGAGGAGGA
>C.IL.99.99ET7_AY255824_F2.CM.97.CM53657_AF377956
GCGAGAGCGTCAATATTAAGAGGGGGACAATTGGATAGGTGGGAAAAAATTAGGTTAAGGCCAGGGGGAAAGAAACATTATATGCTAAAACATTTAGTATGGGCAAGCAGGGAGCTGGAAAGATTTGTACTTAACCCTGGCCTTTTAGAGACAGCAGAAGGCTGTAAACAAATAATGAGACAGCTACACCCAGCTCTTCAGACAGGAACAGAGGAACTTAAATCATTATATAACACAGTGGCAACTCTATACTGTGTACATAAAAACATAGATGTAAAAGATACCAAGGAAGCCTTAGACAAGATAGAGGAAGAACAAAACAAAAGTCAGCAAAAAACACAGCAGGCAACTGCGACGGACGAAACAGTCAGTCAAAATTATCCTATAGTACAGAACCTCCAAGGGCAAATGGTATACCAAAATTTATCACCTAGAACTTTGAATGCATGGGTAAAAGTAATAGAGGAGAAGGCTTTCAGCCCAGAGGTAATACCCATGTTTACAGCATTATCAGAAGGAGCCACCCCACAAGATCTAAACACCATGTTAAATACAGTGGGGGGACATCAAGCAGCCATGCAAATGCTAAAAGATACCATCAATGAGGAGGCTGCAGAATGGGATAGGCTACATCCAGTGCATGCAGGGCCTGTAGCGCCCGGCCAAATGAGAGAACCAAGGGGAAGTGACATAGCAGGAACTACTAGTACCCCTCAGGAACAACTAGCATGGATGACAAGTAACCCACCTGTTCCAGTGGGAGACATTTATAAAAGATGGATAATTCTGGGATTAAATAAAATAGTAAGAATGTATAGCCCTGTCAGCATTTTGGACATAAAACAAGGACCAAAGGAACCCTTTAGAGACTATGTAGACCGGTTCTTTAAAACTTTAAGAGCTGAACAAGCTACACAAGATGTAAAAAATTGGATGACAGACACCTTGTTGGTCCAAAATGCGAACCCAGATTGTAAAACCATTTTAAGAGCATTAGGACCAGGGGCTACATTAGAAGAAATGATGACAGCATGTCAGGGAGTGGGAGGACCTGGCCACAAAGCAAGGGTTTTAGCTGAGGCAATGACCCAAGCAAACAATACCCACATAATGATGCAGAGAAATAATTTTAAAGGTCCTAAGAGAATTGTTAAATGTTTCAACTGTGGCAAGGAAGGGCACCTAGCCAGAAATTGCAGGGCCCCTAGGAAAAAAGGCTGTTGGAAATGTGGAAAGGAAGGACACCAAATGAAAGACTGTACTGAAAGGCAGGCTAATTTTTTAGGGAAATTTTGGCCTTCCCACAAGGGGAGGCCAGGGAATTTCCTTCAGAGCAGACCAGAGCCAACAGCCCCACCAATGGAGAGCTTCAGGTTCGAAGAAACAACCCCCGCTCCAAAACAGGAGTCGAAAGACAGGGAACCCTTAACTTCCCTCAAATCACTCTTTGGCAGCGACCCCTTGTCTCAATAAAAGTAGGGGGCCAGATAAGGGAGGCTCTCTTAGATACAGGAGCAGATGATACAGTATTAGAAGAAATAAATTTGCCAGGAAAATGGAAACCAAAAATGATAGGAGGAATTGGAGGTTTTATCAAAGTAAGACAATATGATCAAATACTTATAGAAATTTGTGGAAAAAAGGCTATAGGTACAGTATTAGTAGGACCTACACCTGTCAACATAATTGGAAGAAATATGTTGACTCAGCTTGGATGTACACTAAATTTTCCAATTAGTCCCATTGAAACTGTACCAGTAAAATTGAAGCCAGGAATGGATGGCCCAAAGGTTAAACAATGGCCATTGACAGAAGAAAAAATAAAAGCATTAACAGCAATTTGTGAAGAAATGGAGAAGGAAGGAAAAATTACAAAAATTGGGCCTGAAAATCCATACAACACTCCAGTATTTGCCATAAAAAAGAAGGATAGTACCAAGTGGAGAAAATTAGTAGATTTTAGGGAACTCAATAAAAGAACGCAAGACTTTTGGGAAGTTCAATTAGGAATTCCACACCCAGCAGGGTTAAAAAAGAAAAAATCAGTGACAGTACTGGATGTGGGGGATGCATATTTTTCAGTTCCCTTAGATGAAAGTTTCAGGAAATATACTGCATTTACCATACCTAGTATAAACAATGAAACACCAGGGATTAGATATCAATATAATGTGCTTCCACAAGGATGGAAAGGATCACCAGCAATATTCCAGAGTAGCATGACAAGAATCTTAGAGCCCTTTAGAGCACAAAACCCAGAAATAGTTATCTATCAATATATGGATGACTTATATGTAGGATCTGATTTAGAAATAGGGCAACATAGGGCAAAAATAGAGGAATTAAGAGGACACCTATTGAGATGGGGATTTACTACACCAGATAAAAAACATCAGAAGGAACCCCCATTTCTTTGGATGGGGTATGAACTCCATCCTGACAAATGGACAGTACAGGCTATACAATTGCCAGACAAGAGCAGCTGGACTGTCAATGATATACAGAAGTTAGTGGGAAAACTAAATTGGGCAAGTCAGATTTATCCAGGGATTAGAGTAAAGCACCTATGCAAACTCCTTAGAGGAGCCAAAGCGCTAACAGACGTAGTACCACTGACTGAAGAAGCAGAATTAGAATTGGCAGAGAACAGGGAAATTCTAAAAGAACCAGTACATGGAGTATATTATGACCCATCAAAAGACTTAATAGCAGAAATACAGAAACAGGGGGATGACCAATGGACATATCAAATTTACCAAGAACCATTTAAAAATTTGAAGACAGGAAAATATGCAAAAATGAGAACTGCCCACACTAATGATGTAAAACAGTTAGTAGGGGCAGTGCAAAAAATAGCTATGGAGGGCATAGTAATATGGGGAAAGATTCCTAAATTTAGACTACCCATCCAAAAAGAAACATGGGAGACATGGTGGACAGACTATTGGCAAGCCACCTGGATTCCTGATTGGGAGTTTGTTAATACCCCTCCCCTAGTAAAATTATGGTACCAACTGGAGAAAGAACCCATAGTAGGAGTAGAAACTTTCTATGTAGATGGAGCAGCTAATAGGGAAACTAAAATAGGAAAAGCAGGGTATGTTACTGACAGAGGAAGGCAGAAAATTGTTTCTCTAACTGAAACAACAAATCAGAAGGCTGAATTACAAGCAATCCAGATAGCTTTGCAAGATTCAGGGTCAGAAGTAAACATAGTAACAGACTCCCAGTATGCATTAGGAATCATTCAAGCACAACCAGATAAGAGTGAATCAGAGTTAGTCAATCAAATAATAGAACAGTTAATAAAAAAGGAAAGGATCTACCTGACATGGGTACCAGCACATAAGGGAATTGGAGGAAATGAACAAGTAGATAAATTAGTAAGTAATGGAATCAGGAAAGTGCTGTTTCTAGATGGAATAGATAAGGCTCAAGAAGAACATGAAAAATATCACAGCAATTGGAGAGCAATGGCTAATGAGTTTAATCTGCCACCTGTAGTAGCAAAAGAAATAGTAGCCAGCTGTGATAAATGCCAATTAAAAGGGGAAGCCATACATGGACAAGTAGACTGTAGTCCAGGGATATGGCAATTAGATTGTACACATTTAGAAGGAAAAGTCATCCTGGTAGCAGTCCATGTAGCCAGTGGCTACATAGAAGCAGAGGTTATCCCAGCAGAAACAGGACAAGAGACAGCATACTATATACTGAAATTAGCAGGAAGATGGCCAGTCAAAGTAATACATACAGACAATGGCAGTAATTTCACCAGTGCTGCAGTTAAGGCAGCCTGTTGGTGGGCAGGTATCCAACAGGAATTTGGAATTCCCTACAATCCCCAAAGTCAGGGAGTAGTAGAATCCATGAATAAAGAGTTAAAGAAAATCATAGGGCAGGTAAGAGAACAAGCTGAGCACCTTAAGACAGCAGTACAAATGGCAGTATTCATTCACAATTTTAAAAGAAAAGGGGGGATTGGGGGGTACAGTGCAGGGGAAAGAATAATAGACATAATAGCAACAGATATACAAACTAAAGAATTACAAAAACAAATTATAAAAATTCAAAATTTTCGGGTTTATTACAGAGACAGCAGAGACCCTATTTGGAAAGGACCAGCCAAACTACTCTGGAAAGGTGAAGGGGCAGTAGTGATACAAGATAATAGTGACATAAAGGTAGTACCAAGGAGGAAAGCAAAAATCATTAAGGATTATGGAAAACAGATGGCAGGGGCTGATTGTGTGGCAGGTAGACAGGATGAAGATTAAAACATGGAATAGTTTAGTAAAGCACCATATGTATGTTTCAAAGAGAGCTAGTGGATGGTTCTATAGACATCATTATGAAAGCAGACATCCAAAAGTAAGTGCAGAAGTACACATCCCATTAGGGGATGCTAGATTAGTAATAAAAACATATTGGGGTTTGCATACAGGAGAAAGAGATTGGCATTTGGGTCATGGAGTCTCCATAGAATGGAGATTGAGAAGATATAGCACACAAGTAGACCCTGGTCTGGCAGACCAGCTAATCCACATGCATTATTTTGATTGTTTTGCAAAATCTGCCATAAGAAAAGCCATATTAGGACATATAGTTATTCCTAGGTGTGACTATCAAGCAGGACATAATAAGGTAGGATCTCTACAATACTTGGCACTGACAGCATTGATAAAACCAAAAAAGAGAAAACCACCTCTGCCTAGTGTTAGGAAGCTAGTAGAGGATAGATGGAACAAGCCCCAGAAGACCAGGGGCCGCAGAGGGAACCACACAATGAATGGACACTAGAGCTTTTAGAGGAACTCAAGCAGGAGGCTGTCAGACACTTTCCTAGACCATGGCTCCATAGCTTAGGACAATATATTTATGAAACCTATGGGGATACCTGGACGGGAGTTGAAGCTCTAATAAGAACTCTGCAACAACTATTGTTTACTCATTTCAGAATTGGGTGCCAGCACAGCAGAATAGGCATTATGCCACAGAGAAGAGCAAGAAATGGAGCCCGTAGATCCTAACCTAGAGCCCTGGAACCATCCAGGAAGTCAGCCTAGCACTGCTTGTAATACATGTTACTGTAAAGCCTGCAGCTATCATTGTCTAGTTTGCTTTCAGAAAAAAGGCTTAGGCATTTCCTATGGCAGGAAGAAGCGGAGACGACCAGGACGCAGCGCTCCTCCAAGCAGTGAAGATAATCAAAATCTTATATCAAAGCAGTAAGTACTAAGTAGTAGATGTAATGTTAGAAAGTGTAGATTATAGATTAGGAGTAGGAGCATTGATAGTAGCACTAATCATAGCAATAATTGTGTGGATCATAGTATATATAGAATATAGGAAATTGTTAAGACAAAGAAGAATAGACTGGTTAGTTAACAGAATTAAGGAAAGAGCAGAAGACAGTGGCAATGAGAGTGACGGGGATGCAGAGGAATTGTCAACCATGGTGGATATGGGGCATCTTAGGCTTTTGGATGCTAATGATTTATAATGTGGGAGGAAACTTGTGGGTCACAGTTTATTATGGGGTGCCTGTGTGGAAAGAAGCAAAAACTACTCTATTTTGTGCATCAGATGCTAAAACATATGAGAGAGAAGTGCATAATGTCTGGGCTACACATGCCTGTGTACCCACAGACCCCAACCCACATGAATGGGTTTTGGAAAATGTAACAGAAAATTTTAACATGTGGAAAAATGACATGGTGGACCAGATGCATGAGGATATAATCAGTTTATGGGATCAAAGCCTAAAGCCATGTGTAAAGTTAACCCCACTCTGTGTCACTTTAAACTGTGGTGAGGTTAATGTTACTGTTACTAGTAATGTTACCATCAATAATGATACCATCAATGAACTAAAAAATTGCTCTTTCAATATAACCACAGAAATAAGAGATAAGAAAAAGAGTGAATTTGCACTTTTTTATAGACTTGATATAGTACCACTTAATGAGCAGAATTCCAGTGAGTATAGATTAATAAACTGTAATACCTCAGCAGTAACACAAGCCTGTCCAAAAGTCTCCTTTGACCCAATTCCTATACATTATTGTGCTCCTGCTGGTTATGCGATTCTAAAGTGTAATAACAAGACATTCAATGGAACAGGACCATGCAATAATGTCAGCACAGTACAATGTACACATGGAATTAAACCAGTGGTATCAACTCAGCTACTGCTAAATGGTAGTCTAGCAGAAAAAGAGATAGTAGTTAGATCTGAAAATCTGACAAACAATGCCAAAATAATAATAGTACATCTTAAAAACCATGTAGAAATTGTGTGTACAAGGCCCAACAATAATACAAGGAAAAGTATGAGGATAGGACCAGGACAAACATTCTATGCAACAGGAAGCATAATAGGAGATATAAGACAAGCATATTGTACCATTAATGGAATGAAATGGAATGAAACTTTACAAGGGGTAGGTGAAAAATTACAAAAACACTTCCCTAATAGAACAATAAGGTTTGAACCATCCTCAGGAGGGGACCTAGAGGTTACAACACATAGCTTTAATTGTAGAGGAGAATTTTTCTACTGCAATACATCAAACCTGTTTAATAGTACATACAGGTCTAATAGTACTAATAGTACTTCAGATACATCCATCATACTCCCATGCAGAATAAAACAAATTATAAACATGTGGCAGGGGGTAGGACGAGCAATGTATGCCCCTCCCATTGAAGGAAACATAACATGTAAATCAAATATTACAGGACTACTATTGACACGTGATGGAGGAACGGACAATGAAACAATAGAGACATTCAGACCTGGAGGAGGAGATATGAGGGATAATTGGAGAAGTGAATTATACAAATATAAAATAGTAGAAATTAAGCCATTAGGAGTAGCTCCAACTGCGGCAAAAAGGAGAGTGGTGGAGAGAGAAAAAAGAGCAGCGGGAATAGGAGCTTTGTTCCTTGGGCTCTTGGGAGCAGCAGGAAGCACTATGGGCGCAGCGTCAATAACGCTGACGGTACAGGCCAGGCAATTGTTGTCTGGTATAGTGCAACAGCAAAGCAATTTGCTGAGGGCTATAGAGGCGCAACAGCATATGTTGCAACTCACAGTCTGGGGCATTAAGCAGCTGCAGACAAGAGTCCTGGCTATAGAAAGATACCTAAAGGATCAACAGCTCCTAGGGATTTGGGGCTGCTCTGGAAAACTCATCTGCACCACTAATGTGCCTTGGAACTCTAGTTGGAGTAATAAATCTCAAGAGGATATTTGGAGTAACATGACTTGGATGCAGTGGGATAGAGAAATTAGTAAGTACACAAACACAATATACGGGTTGCTTGAAGTCTCGCAAAACCAGCAGGAAGAAAATGAAAAAGAATTACTAGCATTGGACAGGTGGAAAAATCTGTGGAATTGGTTTGACATAACAAATTGGCTGTGGTATATAAAGATATTCATAATGATAGTAGGAGGCTTGATAGGTTTAAGAATAATTTTTGCTGTGCTCTCTATAGCAAATAGAGTTAGGCAGGGATACTCACCTTTATCGTTTCAGACCCTTATCCCAAACCAGAGGGGACTCGACAGGCTCGGAAGAATCGAAGAAGGAGGTGGAGAGCAAGACAGAAACAGATCCATACGATTAGTGAACGGATTCTTAGCACTTGCCTGGGACGATCTGCGGAGCCTGTGCCTCTTCAGCTACCACCACTTGAGAGACTTCATATTGATTGTAGCGAGAGCAGCGGAACTTCTGGGACGCAGCAGCCTCAGGGGAATACAACGGGGGTGGGAAGCCCTTAAGTATCTGGGAAGTCTTGTGCAGTATTGGGGTCTAGAGCTAAAAAAGAGTGCTATTAGTCTGCTTGATACCATAGCAATAACAGTAGCTGAAGGAACAGATAGAATTATAGAAGTAGTACAAAGAGGTTGGAGAGCTCTCTGCAACATACCTAGAAGAATAAGACAGGGCTTTGAAGCAGCATTGCAATAATATGGGGGGCAAGTGGTCAAAATCCAGTCTAGTCGGGTGGCCTGCGGTAAGAGACAGAATAAGCAGAACTGATCCAGCAGCAGAAGGAGTAGGAGCAGCGTCTCAAGACTTAGATAAACATGGGGCACTTACAAGCAGCAACACAGTTGCCACCAATAAAGATTGTGCCTGGCTGGAAGCGCAAGAGCAGGAAGAAGAGGTAGGCTTTCCAGTCAGACCTCAGGTACCTTTAAGACCAATGACTTACAAGGGAGCAGTAGATCTCAGCTGGTTCTTAAAAGAAAAGGGGGGACTGGAAGGGTTAATTTACTCTAAGAAAAGGCAAGAGATCCTTGATTTGTGGGTCTATCACACACAAGGTTTCTTCCCTGATTGGCAAAACTACACACCGGGACCAGGGGTCAGATATCCACTGACCTTTGGATGGTGCTTCAAACTAGTACCAGTGGATCCAAAGGAAGTAGAAGAAGCCAACGAAGGAGAAAACAACTGTTTGCTACACCCTATGAGCCTGCATGGAATAGAGGATGAAGACAGAGAAGTATTAAGGTGGAAGTTTGACAGTCATCTAGCACGCAGACACATGGCCCGCGAGCTACATCCGGACTTTTACAAAGACTGCTGACACAGAAGGGACTTTCCGCTGGGACTTTCCACTGGGGCGTTCCAGGAGGAGTGGTCTGGGCGGGACGAGGAGTGGCTAGCCCTCAGATGCTGCATATAAGCAGCTGCTTTTCGCTTGTACTGGGTCTCTCTCGGTAGACCAGATTAGAGCCTGGGAGCTCTCTGGCTATCTAGGGAACCCACTGCT
>C.ZA.03.SK040B1_AY703908_G.ES.00.X558_AF423760
TCTGTTGTGTGACTCTGGTAACTAGAGATCCCTCAGACCCTTTGTGGTAGTGTGGAAAATCTCTAGCAGTGGCGCCCGAACAGGGACCCGAAAGCGAAAGTAGGACCAGAGCAGATCTCTCGACGCAGGACTCGGCTTGCTGAAGTGCACTCGGCAAGAGGCGAGAGCGGCGACTGGTGAGTACGCCATTTTATTTGACTAGCAGAGGCTAGAAGGAGAGAGATGGGTGCGAGAGCGTCAGTATTAAGAGGCGAAAAATTAGATAGATGGGAAAAAATTAGGTTAAGGCCAGGGGGAAAGAGATGTTATATGCTAAAACATTTAGTATGGGCAAGCAGGGAGCTGGAAAGATTTGCACTTAACCCTGGTCTTTTAGAAACAGCAGAAGGCTGTAAACAAATAATAAAGCAGCTACACCCAGCTCTTCAGACAGGAACAGAGGAACTTAGATCATTATACAACACAATAGCAACTCTCTATTGTGTACATGCAAGGATAGAAGTACGAGACACCAAGGAAGCCTTAGACAAAATAGAGGAAGAACAAAACAAGGTCAGCAAAAAGACACAGCAGGCAGCGGCTGACGGAAACAACAGCCAAACCAGCCAAAATTATCCTATAGTGCAGAATGCACAAGGGCAAATGGTACATCAGCCCATATCACCCAGAACTTTAAATGCATGGGTAAAAGTAGTAGAAGAAAAGGCCTTCAGTCCAGAAGTAATACCTATGTTTTCAGCATTATCAGAAGGAGCCACCCCGCAAGATTTAAATACCATGCTAAACACAGTAGGGGGGCATCAAGCAGCTATGCAAATGCTAAAGGATACTATCAATGAAGAGGCTGCAGAATGGGATAGATTACACCCAGTACATGCAGGGCCTAATCCAGCAGGCCAGATGAGAGAACCAAGGGGAAGTGACATAGCAGGAACTACTAGTACCCTTCAGGAACAGATAGCCTGGATGACAGGCAACCCACCTATTCCAGTGGGAGACATCTATAAAAGATGGATAATTCTGGGGTTAAATAAAATAGTGAGAATGTATAGCCCTGTTAGCATTTTGGACATAAAACAAGGGCCAAAGGAACCTTTTAGAGATTATGTAGACCGGTTCTTTAAAGTTTTAAGAGCTGAACAAGCTACACAAGATGTAAAAAATTGGATGACAGACACCTTGTTGGTCCAAAATGCGAACCCAGATTGTAAGACCATTTTAAAAGCATTAGGACCAGGGGCCACATTAGAAGAAATGATGACAGCATGTCAGGGAGTGGGAGGACCTGGCCACAAAGCAAGAGTATTGGCTGAGGCAATGAGCCAAACAAACTGCAACATAATGATGCAGAGGAGCAATTTTAAAGGCTCTAAAAGAACTGTTAAATGTTTCAACTGTGGCAGGGAAGGGCACATAGCCAGAAACTGCAGGGCCCCTAGGAAAAAAGGCTGTTGGAAATGTGGACAGGAAGGACACCAAATGAAAGACTGTACTGAAAGGCAGGCTAATTTTTTAGGGAAAGTTTGGCCTTCCCAGAAGGGGAGGCCGGGAAATTTCCTTCAGAGCAGACCAGAACCAACAGCCCCACCAACAAGACTAGAGCCAACAGCCCCACCGGCAGAGAGCTTCAGGTTCGAGGAGAAGCAGGAGTCGAAAGACAGGGAACCTTTAACTTCCCTCAGATCACTCTTTGGCAGCGACCCCTTGTCTCAATAAAAGTAGGGGGTCAGGTAAAGGAGGCTCTCTTAGACACAGGAGCAGATGATACAGTATTAGAAGAAATAAATTTGCCAGGAAAATGGAAACCAAAAATGATAGGAGGAATTGGAGGTTTTATCAAAGTAAGACAGTATGATCAAATACTTATAGAAATTTGTGGAAAAAAGGCTATAGGTACAGTATTAGTAGGGCCTACACCCGTCAACATAATTGGAAGAAATATGTTGACTCAGCTTGGATGCACACTAAATTTTCCAATTAGTCCCATTGAAACTGTACCAGTAAAACTAAAGCCAGGAATGGATGGCCCAAAGGTTAAACAATGGCCATTGACAGAAGAGAAAATAAAAGCATTAACAGCAATTTGTGATGAGATGGAGAAGGAAGGAAAAATTACAAAAATTGGGCCTGAAAATCCATATAACACTCCAATATTTGCCATAAAAAAGAAAGACAGTACTAAGTGGAGAAAGTTAGTAGATTTCAGGGAACTCAATAAAAGAACTCAAGACTTTTGGGAGGTTCAATTAGGAATACCACACCCAGGAGGGTTAAAAAAGAAAAAATCAGTGACAGTACTGGACGTGGGGGATGCATATTTTTCAGTTCCTTTAGATGAAAGCTTCAGGAAATATACTGCATTCACCATACCTAGTATAAACAATGCAACACCAGGGATTAGATATCAATATAATGTACTCCCACAAGGGTGGAAAGGATCACCAGCAATATTCCAAAGTAGCATGATAAAAATCTTAGAGCCCTTTAGAGCAAAAAATCCAGACATAGTCATCTATCAATATATGGATGACTTGTATGTAGGATCAGACTTAGAAATAGAGCAACATAGAGCAAAAATAGAGGAACTAAGAGAGCATCTATTAAGGTGGGGACTTACCACACCAGACAAAAAACATCAGAAAGAACCCCCATTTCTTTGGATGGGGTATGAACTCCATCCTGACAAATGGACAGTACAGCCTATACAGCTGACAGAAAAAGAAAGCTGGACTGTCAATGATATACAGAAGTTAGTGGGAAAATTAAACTGGGCAAGTCAGATTTACCCAGGAATTCAAGCAAAACACCTTTGTAAGCTCCTTAGGGGGGTCAAAGCACTAACAGACATAGTACCACTAACTGAAGAAGCAGAATTAGAATTAGCAGAAAACAGGGAAATTCTAAAAGAACCAGTACATGGAGTATATTATGACCCATCAAAAGATTTGATAGCTGAAATACAGAAACAGGGGCAGGGCCAATGGACATATCAAATTTACCAGGAACCATTCAAAAATCTAAAAACAGGAAAGTATGCAAAAATGAGGACTGCCCACACTAATGATGTAAAACAGTTAGCAGAAGCAGTGCAAAAAATAACCTTGGAGAGCATAGTAATATGGGGAAAGACTCCTAAATTTAGACTGCACATCCAAAAAGAAACATGGGAAATATGGTGGACAGACTATTGGCAAGCCACCTGGATTCCTGAGTGGGAGTTTGTTAATACCCCTCCCCTAGTAAAATTATGGTACCAGCTGGAGAAAGATCCCATAGCAGGAGCAGAAACATTCTATGTAGATGGAGCAGCTAGTAGGGAAACTAAAATGGGAAAAGCAGGGTATGTTACTGACAGAGGAAGGCAGAAGATTGTTTCTCTAACTGAAACAACAAATCAGAAGGCTGAATTACAAGCAATTCAGCTAGCTTTGCAAGATTCAGGATTAGAAGTAAACATAGTAACAGACTCACAGTATGCATTAGGAATCATTCAAGCACAACCTGATAAGGGTGAATCAGAATTAGTCAACCAGATAATAGAACAATTAATAAACAAGGAAAGGGTTTACCTGTCATGGGTACCAGCACACAAAGGAATTGGAGGAAATGAACAAGTAGATAAATTAGTAAGTAGTGGAATCGGGAAAGTGCTGTTTCTAGATGGGACAGATAAGGCTCAAGAAGAGCATGAAAAATATCACAGCAATTGGAGAGCAATGGCTAGTGAGTTTAATTTACCACCCGTAGTAGCAAAAGAAATAGTAGCTAGCTGTGATAAATGTCAGATAAAAGGGGAAGCCATGCATGGACAAGTAGACTGTAGTCCAGGAATATGGCAATTAGATTGTACACATTTAGAGGGAAAAATCATCCTGGTAGCAGTCCATGTAGCCAGTGGCTACATAGAAGCAGAGGTTATCCCAGCAGAAACAGGACAAGAAACAGCATATTATATATTAAAATTAGCAGGAAGATGGCCAGTCAAAGTAATACATACAGACAATGGCACTAATTTCACCAGTGCTGCTGTCAAGGCAGCCTGTTGGTGGGCAGGTATCCAACAGGAATTTGGAATTCCCTACAATCCCCAAAGTCAGGGAGTAGTAGAATCCATGAATAAAGAATTAAAGAAAATTATAGGGCAGGTAAGAGAGCAAGCTGAGCATCTTAAGACAGCAGTACAAATGGCAGTATTCATTCACAATTTTAAAAGAAAAGGGGGGATTGGGGGGTACAGTGCAGGGGAAAGAATAATAGACATAATAGCAACAGACATACAAACTAAAGAATTACAAAAACAAATTACAAAAATTCAAAATTTTCGGGTTTATTACAGAGACAGCAGAGACCCTATTTGGAAAGGACCAGCCAAACTACTCTGGAAAGGTGAAGGAGCAGTAGTAGTTCAAGATAACAGTGACATAAAGGTAGTACCAAGGAGGAAAGTAAAAATCATTAGGGACTATGGAAAACAGATGGCAGGCGCTGATTGTGTGGCAGGTAGACAGGATGAAGATCAAAACATGGAATAGTTTAGTAAAGCACCATATGTATATTTCAAGGAAAGCTAGTGGATGGTTTTACAGACATCATTATGACAGCAGAAATCCAAAAGTAAGTTCAGAAGTGCATATACCATTAGGAGAGGCTAAATTAGTAGTAAAAACATATTGGGGTTTGCAAACAGGAGAAAGAGATTGGCATTTGGGTCATGGAGTCTCCATAGAATGGAGATTGAGAAAATATAGCACACAAGTAGACCCTAGCCTGGCAGACCAGCTAATTCATATGCATTATTTTGATTGTTTTGCAGACTCTGCCATAAGAAAAGCCATATTAGGACACATAGTTATTCCTAGGTGTGAATATCAAGCAGGACATAATAAGGTAGGATCTCTACAATACTTGGCACTGACAGCATTGATAAAGCCAAAAAAGAGAAAGCCACCTCTGCCTAGTGTTAGAAAATTAGTAGAGGATAGATGGAACAACCCCCAGAAGATCAGGGGCCGCCGAGGGAACCATACAATGAATGGACATTAGAGGTTCTAGAGGAACTCAAGCAGGAAGCTGTCAGACACTTTCCTAGAATGTGGCTCCATGGACTAGGGCAGTATATCTATGAAACCTATGGGGATACTTGGGCAGGAGTTGAAGCTATAATAAGAATACTGCAACAACTACTGTTTATTCATTTCAGAATTGGGTGCCAGCATAGCAGAATAGGAATCTTGCGACAAAGAAGAGCAAGAAATGGATCCAGTAGATCCTAAACTAGATCCCTGGAACCATCCAGGAAGTCAGCCTAACACCCCTTGTAACAAGTGCTTTTGTAAACGATGTAGCTATCATTGTCTAGTTTGCTTTCAGAAAAAAGGCTTAGGCATTTCCTATGGCAGGAAGAAGCGGAGACAGCGACGCAGCACTCCTCCAAGCAGTGAAGATCATCAAAGTCCTATATCAAAGCAGTAAGTATATGTAATGTTAGGTTTAATAGCAAGAGTAGATTATAGATTAGGAGTAGGGGCACTGATAATAGCATTAATCTTAGCAATAGTTGTGTGGGTCCTAGCATATATAGAATATAGGAAATTATTAAGACAACAAAGAATAGACTGGTTAATTAAAAGAATTAGGGAAAGAACAGAAGACAGTGGCAATGAGAGTGAGGGGGATACAGAGGAATTGGCCACAATGGTGGATATGGAGCATCTTAGGCTTGTGGTTGGTAATAATTTGTAGGGGAACAGGGAACTTGTGGGTCACAGTCTATTATGGGGTACCTGTGTGGAAAGAAGCAAAAACTACTCTATTCTGTGCATCAGATGCTAAAGCATATGAGAAAGAAGTGCATAATATCTGGGCTACACATGCCTGTGTTCCCACAGACCCCAACCCACAAGAAATGTTTTTGGAAAATGTAACAGAAAACTTTAACATGTGGAAAAATGACATGGTGGACCAGATGCATGAGGATATAATCAGTATATGGGAGCAAAGTCTAAAACCATGTGTAAAGTTGACCCCACTCTGTGTCACTTTAAACTGTACAAATGCTAACAGCAGTGCTGATAATGACATAATGAAAGAAATAAAAAATTGCTCTTTCAATACAACCACAGAAATAAGAGATAGGAAAAAGAAGGAGTATGCACTTTTTTATAGACCTGATATAGTACCAATTGATGAGAAGAACAACAAATCTAGTTATATATTAATAAATTGCAATACCTCAACCATAACACAAGCTTGTCCAAAGGTCTCTTTTGACCCGATTCCTCTACACTACTGTGCTCCAGCTGGTTATGCGATTCTAAAGTGTAATGATAAGACATTCAATGGGACAGGACCATGCAATAATGTCAGCACAGTACAATGTACACATGGAATTAAGCCAGTGGTATCAACTCAACTACTGTTAAATGGTAGCCTAGCAGAAGAGGAGATAATAATTAGTTCTGAAAATCTGACAAACAATGCCAAAACAATAATAGTGCACCTTAATAGGTCTGTAGAAATTGTGTGTACAAGACCCCACAATAATACAAGGGAAGGTATAGGAATAGGACCAGGACAAACATTCTTTGTAACAAAGAAAATAATAGGAAACATAAGACAAGCACATTGTAACATTAGTGGAGGAAATTGGAGCACTACTATAGATGAGGTAAAAAGGAAATTAGGAGAACACTTCCCTAATACATCAATACAATTCGAACCATCCTCAGGAGGAGACCTAGAAATTACAACACATAGTTTTAATTGTAGAGGAGAATTTTTCTATTGCAATACAGCAGACCTGTTTACTAATGTAAGTAGAAATGGGACCATCACACTCCCATGCAGAATAAAACAAATTGTAAACATGTGGCAGGGGGTAGGACGAGCAATGTATGCCCCTCCCATTGAAGGAAACATAACATGTAAATCAAATATCACAGGATTATTATTGCTACGTGATGGAGGAAACATGGGAGGAGACACCAGTACGAATGGCATAAAGAACGAGACATTCAGACCTGGGGGAGGAAATATGAAAGACAATTGGAGAAGTGAACTATATAAATATAAAGTGGTAGAAATTAAGCCATTGGGAGTGGCACCCACAGGGGCAAAAAGGACAGTGGTGGAGAGAGAAAAAAGAGCAGTGGGGATAGGAGCTGTGCTCTTTGGGTTCTTGGGAGCAGCAGGAAGCACTATGGGCGCGGCGTCAATAACGCTGACGGTACAGGCCAGACAATTGTTGTCTGGTATAGTGCAACAGCAAAGCAATTTGCTGAGAGCTATAGAGGCGCAACAGCATATGTTGCAACTCACAGTCTGGGGCATTAAACAACTCCAGGCAAGAGTCTTGGCTATAGAAAGATACCTAAAAGATCAACAGCTCCTAGGGCTTTGGGGCTGCTCTGGAAAACTCATCTGCACCACTACTGTGCCCTGGAACTCCAGTTGGAGTAATAGATCTGAAGCAGATATTTGGAATAACATGACCTGGATGCAATGGGATAGAGAAATTAATAATTACACAAACACAATATACAGGTTGCTTGAAGACTCACAAAACCAGCAGGAGAAAAATGAAAAAGATTTATTAGCATTGGACAGTTGGAAAAACTTGTGGAGTTGGTTTAGCATAACAAATTGGCTGTGGTACATAAAAATATTCATCATGATAGTAGGAGGCTTGATAGGTTTAAGAATAATTTTTGGTGTGCTCTCTATAGTGAATAGAGTTAGGCAGGGATACTCACCTTTGTCGTTTCAGACCCTTACCCCAAACCCGAGGGAACTCGACAGGCTCGGAAGAATCGAAGAAGAAGGTGGAGAGCAAGACAGAGACAGATCCATTCGATTAGTGAACGGATTCTTAGCACTTGCCTGGGACGATCTACGGAGCCTGTGCCTTTTCTGCTACCACCAATTGAGAACCTTCATATTGGTGACAGCGAGGGCAGTGGAACTTCTGGGACGCAGCAGTCTCAAGGGACTACAGAGGGGTTGGGAAGCCCTTAAGTATCTGGGAAATCTTGTGCTGTATTGGGGTCTGGAGCTAAAAAAGAGTGCTATTAATCTGCTTGATACTGTAGCAATAGCAGTAGCTGAAGGAACAGGTAGGATTATAGAATTTATACAAAGAATTTATAGAGCTATCTGTAACGTACCCACAAGAATAAGACAGGGCATTGAAGCAGCTTTACTATAAGATGGGGGCCAAGTGGTCAAAAAGCAGCATAGTTGGATGGCCTGATGTAAGAGAAAGAATAAGAAGAGCTAAGCCAGCAGCAGAGGGAGTAGGAGCAGCGTCTCAAGACTTAGATAAATATGGAGCACTTACAGTCAGTAACACAGTCCACAATAATGCTGATTGTGCCTGGCTGCAAGCACAGGAGGAGGCAGAAGAAGTAGGCTTTCCAGTCACACCTCAGGTGCCTTTAAGACCAATGACTTATAAGGCAGCAGTTGATCTCGGCTTCTTTTTAAAAGAAAAGGGGGGACTGGAAGGGTTAATTTGGTCTAAGAAAAGGCAAGACATCCTTGATTTATGGGTCTATCACACACAAGGCTACTTCCCTGATTGGCAAAACTACACACCGGGACCAGGGGTCAGATACCCACTGACCTTTGGATGGCCCTTCAAGCTAGTGCCAGTGGACACAAGGGAAGTAGAAGAGGCCAATGAAGGAGAGAACAACTATTTGCTACACCCTATAAGCCTGCATGGAATAGAGGATGAAGAAAGAGAAGTATTAAAGTGGGCTTTTGATAGCAGCCTAGTACGCAGGCACATGGCCCGCGAGCTACATCCGGAGTATTACAAAGACTGCTGACACAGAAGGGACTTTCCGCCTGGGACTTTCCACCAGGGGCGTTCCAGGAGGAGTGGTCTGGGCGGGACTTGGGAGTGGTCAACCCTCAGATGCTGCATATAAGCAGCTGCTTTTCGCCTGTACTGGGTCTCTCTAGGTAGACCAGATCTGAGCCCGGGAGCTCTCTGGCTATTTAGAGAACCCACTGCTTAAGCCTCAATA
>C.ZA.04.SK143B1_AY703910_H.CF.90.056_AF005496
TCTGTTGTGTGACTCTGGTAACTAGAGATCCCTCAGACCCTTGTGGTAGTGTGGAAAATCTCTAGCAGTGGCGCCCGAACAGGGACCTGAAAGCGAAAGTAAGACCAGAGGAGATCTCTCGACGCAGGACTCGGCTTGCTGAAGTGCACTCGGCGAGAGGCGAGAGCGGCGGCTGGTGAGTACGCCAATTTTTATTTGACTAGCGGAGGCTAGAAGGAGAGAGATGGGTGCGAGAGCGTCAATATTAAGAGGGGGAAAATTAGATAAATGGGAGAAAATTAGGTTAAGGCCAGGGGGAAAGAAAAGATATAGGTTAAAACATTTAGTATGGGCAAGCAGGGAGCTGGAAAGATTTGCACTTAACCCTGGCCTTTTAGAAACATCAGATGGCTGTAAACAAATAATACAACAGCTACAACCAGCTCTTCAGACAGGAACAGAGGAACTTAGATCATTATACAACACAATAGCAACTATCTATTGTGTACAAAAAGGGATAGAGGTACGAGACACCAAGGAAGCTTTAGACAAGATAGAGGAGGAACAAAATAAAAGTCAACAAAAGGCACAGCAAGCCGAAACGACTGACAAAGGAAAGGTCAGTCAAAATTATCCAATAGTGCAAAATCTCCAAGGGCAAATGGTACACCAAGCCTTATCACCAAGAACTTTGAATGCATGGGTAAAAGTAATAGAGGAGAAGGCTTTCAGCCCGGAGGTAATACCCATGTTTACAGCATTATCAGAGGGAGCCACCCCACAAGATTTAAACACCATGCTAAATACAGTGGGGGGACATCAAGCAGCCATGCAAATGCTAAAAGATACCATTAATGAGGAGGCTGCAGAATGGGATAGATTACATCCAATACATGCAGGGCCTGTTGCACCCGGCCAAATGAGAGAACCAAGGGGAAGTGACATAGCAGGAACTACTAGTACCCTTCAGGAACAAATAGCATGGATGACAAGTAACCCACCTATTCCAGTGGGAGACATTTATAAAAGATGGATAATTCTGGGGCTAAATAAAATAGTAAGAATGTATTGCCCTGTCAGCATTTTGGACATAAGACAAGGACCAAAGGAACCCTTTAGAGACTATGTAGACCGGTTCTTTAAGGTTTTAAGAGCTGAACAAGCTACACAAGATGTAAAAAACTGGATGACAGATACCTTGTTAGTCCAAAATGCGAACCCAGATTGTAAGACCATTTTAAAGGCATTAGGAACAGGGGCTACACTAGAAGAAATGATGACAGCATGTCAGGGAGTGGGAGGGCCTGGCCACAAAGCAAGAGTTTTGGCTGAGGCAATGAGCCACGCAAACAATATACACATAATGATGCAGAGAAACAATTTTAAAGGCTCTAGAAAACCTGTTAAATGTTTTAACTGTGGCAAAGAAGGGCACATAGCCAGAAATTGCAAGGCCCCTAGAAAAAAGGGCTGTTGGAAATGTGGAAAAGAAGGACACCAAATGAAAGACTGTACTGAAAGGCAGGCTAATTTTTTAGGGAAAATATGGCCTTCCCACAAGGGGAGGCCAGGGAATTTCCTTCAGAGCAGACCAGAGCCAACAGCCCCACCAGCAGAGAGCTTCAAGGTCGAGGAAATAACCCCCGCTCCGAAGCAGGAGATGAAAGACAGGGAGCCTTTAACTTCCCTCAGATCACTCTTTGGCAGCGACCCCTTGTCCCAATAAAAGTAGGGGGTCAAATAAGGGAGGCTCTCTTAGATACAGGAGCAGATGATACAGTATTAGAAGATATAAATTTGCCAGGAAAATGGAAACCAAAAATGATAGGAGGAATTGGAGGCTTTATCAAAGTAAGACAGTATGATCAAATACTTATAGAAATTTGTGGAAAAAAGGCTATAGGTACAGTATTAGTGGGACCTACACCTGTCAACATAATTGGAAGAAATATGTTGACTCAACTTGGATGTACACTAAATTTTCCAATTAGTCCCATTGAAACTGTACCAGTAAAATTAAAGGCAGGAATGGATGGCCCAAAGGTTAAACAATGGCCATTGACAGAAGAAAAAATAAAAGCATTAACAGCAATTTGTGAAGAAATGGAGAAGGAAGGAAAAATTACAAAAATTGGACCTGAAAATCCATATAACACTCCAGTATTTGCCATAAAAAAGAAGGACAGTACTAAGTGGAGAAAATTAGTAGATTTCAGGGAACTCAATAAAAGAACTCAAGACTTTTGGGAAGTTCAGTTAGGAATACCACACCCAGCAGGGTTAAAAAAGAAAAAATCAGTGACAGTGCTGGATGTGGGGGATGCGTATTTTTCAGTTCCTTTAGATGAAAGCTTCAGGAGATATACTGCATTCACCATACCTAGTATAAACAATGAAACACCAGGGATTAGATATCAATATAATGTGCTTCCACAAGGATGGAAAGGATCACCAGCAATATTCCAGAGTAGCATGACAAAAATCTTAGAACCCTTTAGAGCAAAAAACCCAGAAATAGTTATCTATCAATATATGGATGACTTATATGTAGGGTCTGATTTAGAAATAATGCAACATAGAGCAAAAATAGAGGAGTTAAGAAACCACCTATTGAAATGGGGATTTACCACACCAGACAAGAAGCATCAGAAAGAACCCCATTTCTTTGGATGGGTTATGAACTCCATCCTGACAAATGGACAGTACAACCTATACAGCTGCCAGACAAGGATAGCTGGACTGTCAATGATATACAGAAGTTAGTGGGAAAATTAAACTGGGCAAGTCAGATTTACCCAGGGATTAGAATAAAACAATTGTGCAAGCTACTTAGGGGAGCCAAAGCACTAACAGACATAGTACAACTGACTGAAGAAGCAGAATTAGAATTGGCAGAGAATAGAGAAATTCTAAAAGAACCAGTACATGGAGTATATTATGACCCATCAAAAGAATTAATAGCGGAGATACAGAAACAGGGGCGTGACCAATGGACATACCAAATTTACCAAGAACCATTCAAAAATCTGAAAACAGGGAAGTATGCAAAAATGAGGACTGCCCACACTAATGATGTAAAACAGTTAACAGAGGCAGCGCAAAAAATAGCCATGGAAAGTATAGTAATATGGGGAAAGACTCCTAAATTTAGACTACCCATCCAAAAAGAAACATGGGAGACATGGAGGACAGACTATTGGCAAGCCACCTGGATCCCTGAGTGGGAGTTTGTTAATACTCCTCCCCTAGTAAAATTATGGTACCAGCCGGAGAAAGAACCCATACCAGGAGCAGAAACTTTCTATGTAGATGGAGCATATAATAGGGACACCAAAACAGGAAAAGCAGGGTATGTTACTGACAGAGGAAGGCAAAAAATTGTTCCTTTGACTGAAACAACAAATCAAAAGGCTGAGTTACAAGCAATTCAACTAGCTTTGCAGGAATCAGGACCAGAAGTAAATATAGTAACAGACTCACAGTATGCATTAGGGATCATTCAAGCACAACCAGATAAGAGTGAATCAGAGTTAGTTAACCAAATAATAGAACAGCTAATAAACAAGGAAAGAATCTACCTATCATGGGTACCAGCACATAAAGGAATTGGAGGAAATGAACAAGTAGATAAATTAGTAAGCAAGGGAATCAGAAAAGTGCTGTTTCTAGATGGAATAGATAAGGCTCAAGAAGACCATGAAAAATATCACAGCAATTGGAGAGCAATGGCTAATGATTTTAATCTGCCACCCATAGTAGCAAAAGAAATAGTAGCCAGCTGTGATAAATGTCAACTAAAAGGGGAAGCCATACATGGACAAGTAGACTGTAGTCCAGGGATATGGCAATTAGATTGTACACATTTAGAAGGAAAAGTCATCCTGGTAGCAGTCCATGTAGCCAGTGGCTACATGGAAGCAGAGGTCATCCCAGCAGAAACAGGGCAAGAAACAGCATACTATATATTAAAATTAGCAGGAAGATGGCCAGTCAAGGTAATACATACAGACAATGGCAGTAATTTCACCAGTGCTGCAGTTAAGGCAGCCTGTTGGTGGGCAGGTATCCAACAGGAATTTGGAATTCCCTACAATCCCCAAAGTCAGGGAGTAGTAGAATCCATGAATAAGGAATTAAAGAAAATCATAGGGCAGGTAAGAGACCAAGCTGAGCACCTTAAGACAGCAGTACAAATGGCAGTATTCATTCACAATTTTAAAAGAAAAGGGGGGATTGGAGGGTACAGTCCAGGGGAAAGAATGATAGACATAATAAAGAATGATAGACATAATAGCAACAGATATACAAACTAAAGAATTACAAAAACAAATTATAAAAATTCAAAATTTTCGGGTTTATTACAGAGACAGCAGAGACCCTATTTGGAAAGGACCAGCCAAACTACTCTGGAAAGGTGAAGGGGCAGTAGTGATACAAGATAATAGTGACATAAAGGTAGTACCAAGGAGGAAAGCAAAAATCATTAAAGACTATGGAAAACAGATGGCAGAGGCTGATTGTATGGCGGGTAGACAGGATGAAGATCAGAACATGGAATAGTTTGGTAAAGCATCATATGTATGTCTCAAAGAGGGCTAGTAGATGGTTCTATAGACATCATTTTGAAAGCAGGAATCCAAAAATAAGTTCAGAAGTACACATTCCATTAGGGGATGCTACACTAGTAATAAAAACATATTGGGGTTTGCAGACAGGAGAAAGAGAGTGGCATCTGGGTCATGGAGTCTCCATAGAATGGAGATTGAGAAGATATAACACACAAGTAGACCCTAGCCTGGCAGACCAGCTAATCCATAAACATTATTTTGATTGTTTTACAGAATCTGCCATAAGACAAGCCATATTAGGACACATAGTTATTCCTAGGTGTGACTATCCAGCAGGACATAATAAGGTAGGATCTCTACAATACTTGGCACTGACAGCACTAATAAAACCAAAGAAGAGAAAGCCACCTCTGCCTAGTGTTAGGAAATTAGTAGAGGATAGATGGAACAACCCCCAGAAGACCAGGGGCCGCAGAGGGAACCACACAATGAATGGACGCTAGAGCTTCTAGAGGAACTCAAGCAGGAAGCTATCAGACACTTTCCCAGAGCATGGCTCCATGGCTTGGGACAACATATATATGAAACCTATGGAGATACTTGGGCGGGAGTTGAAGCTATAATAAGAATTCTGCAACAACTACTGTTTATTCATTTCAGAATTGGGTGCCAGCACAGCAGAATAGGCATTATAATGCGACAGAGAAGAGCAAGAAATGGAGCCAATAGATCCTAACCTAGAGCCCTGGAACCATCCAGGAAGTCAGCCTAAAACTGCTTGCAATAAGTGCTTTTGTAAATATTGTAGCTATCATTGTCTAGTTTGCTTTCAGACAAAAGGCTTAGGCATTTCCTATGGCAGGAAGAAGCGGAGACAACGACGAAGCGCTCCTCCGAGCAGTGAGGATCATCAAAATCTTATATCAAAGCAGTAAGTAATAAGTAGTAGATGTAATGCTAAGTTTAGTAGAACGAGTAGATTATAGATTAGGAGTAGGAGCATTGATAGTAGCATTAATCTTAGCAATAATTGTGTGGATCATAGCATATATAGAATATAGGAAATTGGTAAGACAAAAAAAAATAAACTGGTTAATTGAGAGAATTAGGGAAAGAGCAGAAGACAGTGGCAATGAGAGTGATGGGGACACTGAGGAATTATCAACAATGGTGGAGGTGGGGAATCTTGGGCTTTTGGATGCTAATTAGTTGTAATGTGGGAGGAAACTTGTGGGTCACAGTCTATTATGGGGTACCTGTGTGGAAAGAAGCAAAAACTACTTTATTCTGTGCATCAGATGCTAAAGCATATGATAGGGAGGTGCATAATGTCTGGGCTACACATGCCTGTGTACCCACAGACCCCAACCCACAAGAAATAATTTTGGGAAATGTAACAGAAAATTTTAACATGTGGAAAAATGACATGGTGGAGCAGATGCATGAGGATATAATCAGTTTATGGGATCAAAGCCTAAAGCCATGTGTAAAGTTGACCCCACTCTGTGTCACTTTAAATTGTACAAATGTTACCAGAAATAGTAATGTTACCGTCAATAATACCATGAAGGAAGAAATAAGAAATTGCTCTTTCAATACAACCACAGAACTAAGAGATAAGAAAAAGACTGCATATGCACTTTTTTATAGGCTTGATCTAGTACCACTTACTAAGAATGAGAGCAACTTTACTGAGTATAGATTAATAAGGTGTAATACCTCAACCATAACACAAGCCTGTCCAAAGGTCACTTTTGACCCAATTCCTATACATTATTGTGCCCCAGCTGGTTATGCGATTCTAAAATGCAATAATAATACATTCAGTGGACAAGGACCATGCACTAATGTCAGCACAGTACAATGTACACATGGAATTAAGCCAGTAGTATCAACTCAATTACTGTTAAATGGTAGTCTAGCAAAAGAAGGGATAGTAATTAGATCTGAAAACCTGACAAATAATGTCAAAACAATAATAGTACAGTTTAACAATTCTGTACAAATTGTGTGTACAAGGCCCAACAATAATACAAGGACAAGTGTGAGGATAGGCCCAGGACAAACATTCTATGCAACAGGAGACATAATAGGAAATATAAGACAGGCACATTGCAACATTAGTGAAGGAGATTGGAATAAGACTCTACAAGGAGTAAAAGAAAAATTAGGAAAATACTTCCCTAATAAAACAATAACTTTTGCACCATCTGTAGGTGGGGACCTAGAAATTACAACACATAGCTTTAATTGTAGAGGAGAGTTTTTCTATTGTAATACATCAAAACTGTTTAATAATAATAGCACAAACAGCACTTCAAATGGAACCATCACACTCCCATGCAGAATAAGACAAATTATAAACATGTGGCAGGGAGTAGGACGGGCAATGTATGCCCCGCCCATTGCAGGAAACATAACATGTACGTCAAATATTACAGGACTACTACTGACACGTGATGAGGGTAACGCGTCTGCAGAAAATTATACCTTCAGACCTGGAGGAGGAGATATGAGGGACAATTGGAGAAGTGAATTGTATAAATATAAAGTAGTAAAAATTGAACCACTGGGAATAGCACCCACCAAGACAAGGAGAAGAGTGGTGGAGAGAGAAAAAAGAGCAGTGGGAATGGGAGCTTCTTTCCTTGGGTTCTTGGGAGCAGCAGGAAGCACTATGGGCGCGGCGTCAATAACGCTGACGGTACAGGCCAGACAATTGTTGTCTGGTATAGTGCAACAGCAAAGCAATTTGCTGAGGGCTATAGAGGCGCAACAGCATATGTTGCAACTCACGGTCTGGGGCATTAAGCAGCTCCAGACAAGAGTCCTGGCTATAGAAAGATACCTAAAGGATCAACAGCTCCTAGGGATTTGGGGCTGCTCTGGAAAACTCATCTGCACCACTGCTGTGCCTTGGAACTCCAGTTGGAGTAATAGATCTGAAACAGACATTTGGGATAACATGACTTGGATGCAGTGGGATAGAGAAATCAATAATTACACAGACATAATATACAGGTTGCTTGAAGAATCGCAAAACCAGCAAGAAGAAAATGAAGAAGATTTACTAGCATTGGACAGTTGGAGCAATCTGTGGAATTGGTTTAAAATAACAACATGGCTGTGGTACATAAAAATATTCATAATGATAGTAGGAGGCTTAATAGGGTTAAGAATAATTTTTGCTGTGATCTCTATAGTGAATAGAGTTAGGCAGGGATACTCACCTTTGTCGTTTCAGACCCTTATCCCAAACCCGAGGGGACCCGACAGGCGCGGAAGAATCGAAGGAGAAGGTGGAGAGCAAGACAGCGACAGATCCATTCGCTTAGTGAGCGGATTCTTAGCTCTTGCCTGGGACGATCTGAGGAGCCTGTGCCTTTGCAGCTACCACCTATTGAGAGACTTCATATTGGTGATAGCGAGGGCGGTGGAACTTCTGGGACGCAACAGTCTCAGAGGAATACAGAGGGGTTGGGAAGCCCTTAAGTATCTGGGAAGTCTTGTGCAGTATCGGGGTCTGGAACTAAAAAGGAGTGCTATTAGTCTGTTTGATACCATAGCAATCACAGTAGCTGAAGGAACAGATAGAATTCTAGAATTAGGACAAGGAATTTGTAGAGCTATCTGCAACATACCTACAAGAATCAGACAGGGCTTAGAAGCAGCGTTGCAATAAAATGGGGGGCAAGTGGTCAAAAAGCAGTTTAGTTGGGTGGCCTGCAGTAAGAGACAGAATGAAGAGAACTGATCCAAAAAGAAATGATCCAGCAGCAGTAGGAGTAGGAGCAGCGTCTCAAGACTTAGATAAATATGGGGCACTTACAAGCAGCAACACAGCTGCCACTAATGCAGATTGTGCCTGGCTGGAAGCACACGAAGAGGAAGAAGAAGTAGGCTTTCCAGTCAGACCTCAGGTGCCTTTAAGACCAATGACTTATAAGGGAGCATTCGATCTCAGCTTCTTTTTAAAAGAAAAGGGGGGACTGGAAGGGTTAATTCACTCTAAGAGAAGACAAGACATCCTTGATTTATGGGTCTATCATACACAAGGCTTCTTCCCTGATTGGCAAAACTACACACCGGGACCAGGGGTCAGATACCCACTGACCTTTGGATGGTGCTTCAAGCTAGTGCCAGTCGACCCACGGGAAGTAGAAGAGGCCACTGAAGGAGAAAACACCTGTCTACTACACCCTATAAGCCAGCATGGAATAGAGGATGCAGACGGAGAAGTATTAAGATGGGAGTTTGACAGTCAACTAGCGCGCAGACACATGGCCCGCGAGCTACATCCGGAGTATTACAAAGACTGCTGACACAGAAGGGACTTTCCGCTGGGACTTTCCACTGGGGCATGCCAGGAGGAGTGGTCTGGGCGGGACAGGGGAGTGGCCAGCCCTCAGATGCTGCATATAAGCAGCTGCTTTTCGCCTGTACTGGGTCTCTCTAGGTAGACCAGATCTGAGCCTGGGAGCTCTCTGGCTATTTAGGGAACCCACTGCTTAAGCCTCAATA
>C.ZA.04.04ZAPS217B1_DQ164119_J.SE.94.SE7022_AF082395
TCTGTTGTGTGACTCTGGTAACTAGAGATCCCTCAGACCATTTTGGTAGTGTGGAAAATCTCTAGCAGTGGCGCCCGAACAGGGACCTGAAAGCGAAAGTGAGACCAGAGAAGATCTCTCGACGCAGGACTCGGCTTGCTGAAGTGCACTCGGCAAGAGGCGAGAGGCGGCGGCTGGTGAGTACGCCAATTTTATTTGACTAGCGGAGGCTAGAAGGAGAGAGATGGGTGCGAGAGCGTCAGTATTAAGAGGCGAAAAATTAGATAAATGGGAAAGAATTAGGTTAAGGCCAGGGGGAAAGAAACATTATATGATAAAGCATTTAGTATGGGCAAGCAGGGAGCTGGAAAGATTTGCACTTAACCCTGGTCTTTTAGAAACATCAGAAGGCTGTAAACAAATACTGACACAGCTACAACCAGCTCTTCAGACAGGAACAGAGGAACTTAAATCATTATACAACACAGTAGCAACTCTCTATTGTGTACATAAAAGGATAGATGTACGAGACACCAAGGAAGCCTTAGACAAGATAGAGGAAGAACAAAAGAACAGTCAGCAAAAAACACAACAGGCAAAAGCGGCTGACGGAGGGGTCAGTCAGAATTATCCTATAGTGCAGAATCTTCAAGGGCAAATGGTACATCAGGCCATATCACCAAGAACCTTGAATGCATGGGTAAAAGTAATAGAGGAGAAGGCTTTTAGCCCAGAGGTAATACCCATGTTTACAGCATTATCAGAAGGAGCCACCCCACAAGATTTAAACACCATGCTAAATACGGTGGGGGGACATCAAGCAGCCATGCAAATGTTAAAAGACACCATCAATGAAGAGGCTGCAGAATGGGATAGAGTACATCCAGTACATGCGGGGCCTGCTGCACCAGGCCAAATAAGAGAACCTAGGGGAAGTGACATAGCAGGAACTACCAGTACCCTTCAGGAACAAATAACATGGATGACAAGTAACCCACCTGTTCCAGTGGGAGAAATCTATAAAAGGTGGATAATTCTGGGATTAAATAAAATAGTGAGAATGTATAGCCCTGTCAGCATTTTGGACATAAGACAAGGGCCAAAGGAACCCTTTAGAGACTATGTAGACCGGTTCTTTAAAACTTTAAGGGCCGAACAAGCTACACAAGATGTAAAAAATTGGATGACAGAAACCTTGTTGGTCCAAAATGCGAACCCTGATTGTAAGACCATTTTAAGAGCATTAGGACCAGGGGCTACATTAGAAGAAATGATGACAGCATGTCAGGGAGTGGGAGGACCTAGCCACAAAGCAAGAGTGTTGGCTGAGGCAATGAGCCAGGCAAACAGTACAAACGTACTGATACAAAGAAGCAATTTTAAAGGCCCTAGAAGAATTGTTAAATGTTTTAACTGTGGCAAGGAAGGGCACATAGCCAAGAATTGCAGAGCCCCTAGGAAAAAAGGCTGTTGGAAATGTGGAAAGGAAGGACATCAAATGAAAGACTGTACTGAAAGGCAGGCTAATTTTTTAGGGAAAATTTGGCCTTCCCACAAGGGGAGGCCAGGGAATTTCCTTCAGAACAGACCAGAGCCAACGGCCCCATTACAGCCAACAGCCCCACCAGCAGAGAGCTTCAGGTTCGAGGAGACAACCCCAGCTCCGAAGCAGGAGCCGAGGGACAGGGAACCCTTAACTTCCCTCAAATCACTCTTTGGCAGCGACCCCTTGTCTCAATAAAAGTAGGGGGTCAGATAAAGGAGGCTCTCTTAGACACAGGAGCAGATGATACAGTATTGGAAGAAATAAATTTGCCAGGAAAATGGAAACCAAAAATGATAGGGGGAATTGGAGGTTTTATCAAAGTAAGACAGTATGAGCAAATACCTATAGAAATTTGTGGAAAAAAGGCTATAGGTACAGTATTAGTAGGGCCTACACCTGTCAACATAATTGGAAGAAATATGTTGACTCAGCTTGGATGCACACTAAATTTTCCAATTAGTCCTATTGAAACTGTACCAGTAAAATTAAAGCCAGGAATGGATGGCCCAAAAATTAAACAATGGCCATTGACAGAAGAAAAAATAAAAGCATTAACACAAATTTGTGCAGAACTGGAAGAGGAGGGAAAAATTTCAAGAATTGGGCCTGAAAATCCATATAACACCCCAGTATTTGCCATAAAGAAAAAAGACAGTACTAAATGGAGAAAATTAGTAGATTTTAGAGAACTCAATAAAAGAACTCAAGACTTTTGGGAGGTTCAATTAGGAATACCACACCCAGCAGGGTTAAAAAAGAAAAAATCAGTGACAGTACTGGATGTGGGAGATGCATATTTTTCAGTTCCTTTAGATGAAGGCTTCAGGAAATATACTGCATTCACCATACCTAGTATAAACACCAGGGATTAGATATCAATATAATGTGCTTCCACAGGGATGGAAAGGATCACCAGCAATATTCCAAAGTAGCATGACAAAAATCTTAGAGCCCTTTAGAGCAAAAAATCCAGAAATGGTCATCTATCAATATATGGATGACTTGTATGTAGGATCTGACTTAGAAATAGGGCAACATAGAGCAAAAATAGAGGAGTTAAGAGAACATCTATTAAGGTGGGGATTTACCACACCAGATAAGAAACATCAGAAAGAACCCCCATTTCTTTGGATGGGGTATGAACTCCATCCTGACAAATGGACAGTACAGCCTATACAGCTGCCAGAAAAGGATAGCTGGACTGTCAATGATATACAGAAGTTAGTGGGAAAATTAAACTGGGCAAGTCGGATTTACCCAGGGATTAAAGTAAGGCAACTTTGTAAACTCCTTAGGGGGGCCAAAGCACTAACAGATATAGTACCACTAACTGAAGAAGCAGAATTAGAATTGGCAGAGAACAGGGAAATTCTAAAAGAACCAGTACATGGAGTATATTATGACCCAGCAAAAGACTTAATAGCTGAAATACAGAAACAAGGGGATGACCAATGGACATGTCAAATTTACCAAGAACCATTCAAAAATCTAAAGACAGGAAAGTATGCAAAAGGGAGGACTGCCCACACTAATGATGTAAAACAGTTAACAGAGGCAGTTCAAAAAATAGCAATGGAAAGCATAGTAATATGGGGAAAGACTCCTAAATTTAGACTACCCATCCAAAAAGAAACATGGGAGACATGGTGGACAGATTATTGGCAAGCCACCTGGATTCCTGAGTGGGAGTTTGTTAATACCCCTCCCCTAGTAAAATTATGGTACCAGCTGGAGAAAGAACCCATAGCAGGAGCAGAAACATTCTATGTGGATGGAGCAGCTAATAGGGAAACTAAAATAGGAAAAGCAGGGTATGTTACAGACAGGGGAAGGCAGAAAATTGTCTCTCTAAATGAAACAACAAATCAAAAGACTGAATTACAAGCAATTCATTTAGCTTTGCAAGATTCAGGATCAGAAGTAAACATAGTAACAGATTCACAATATGCATTAGGAATCATTCAAGCACAACCAGATAGGAGTGAATCAGAGTTAGTCAACCAAATAATAGGACAATTAATACAAAAGGAAAGGGTCTACCTGTCATGGGTACCAGCACACAAAGGAATTGGGGGAAATGAACAAGTAGATAAATTAGTAAGTAGTGGAATCAGAAAAGTCCTGTTTCTAGATGGAATAGATAAGGCTCAAGAAGAGCATGAAAAATATCACAGCAATTGGAGAGCAATGGCTAGTGAGTTTAATCTGCCACCTATAGTAGCAAAAGAAATAGTAGCTAGCTGTGATAAGTGTCAGCTAAAAGGGGAAGCCATGCATGGACAAGTAGACTGTAGCCCAGGGATATGGCAATTAGATTGTACACATCTAGAAGGAAAAATCATCCTGGTAGCAGTCCATGTAGCCAGCGGCTACATAGAGGCAGAGGTTATCCCAGCAGAAACAGGACAGGAAACAGCATACTATATACTAAAATTAGCAGGAAGATGGCCAGTAAAAGTAATACATACAGACAATGGCAGTAATTTCACCAGTGCTGCAGTTAAGGCAGCCTGTTGGTGGGCAGGTATCCACCAGGAATTTGGGATTCCCTACAATCCCCAAAGTCAGGGAGTAGTAGAATCTATGAATAAAGAATTAAAGAAAATTATAGGGCAGGTAAGAGATCAAGCTGGGCACCTTAAGACAGCAGTACAAATGGCAGTATTCATTCACAATTTTAAAAGAAAAGGGGGGATTGGGGGGTACAGTGCAGGGGAAAGAATAATAGACATAATAGCAACAGACATACAAACTAAAGAATTACAAAAACAAATTATAAAAATTCAAAATTTTCGGGTTTATTACAGAGACAGCAGAGACCCTATTTGGAAAGGACTAGCCAAACTACTCTGGAAAGGTGAAGGGGCAGTAGTAATACAAGATAACAGTGACATAAAGGTAGTACCAAGGAGGAAAGTAAAAATCATTAAGGACTATGGAAAACAGATGGCAGGTGCTGATTGTGTGGCAGGTAGACAGGATGAGGATTAGAACATGGAATAGTTTAGTAAAGCACCATATGTATGTTTCAAGGAGAGCTAATGGATGGTTTTACAGACATCATTATGAAAGCAGACATCCAAAAGTAAGTTCAGAAGTACACATACCATTAGGGGAGGCTAGATTAGTAATAAAAACTTATTGGGGGTTGCAAACAGGAGAAAGAGATTGGCATTTGGGTCATGGAGTCTCCATAGAATGGAGAATGAAAAGATATAGCACACAAGTAGATCCTGGCTTGGCAGACCAGCTAATTCATATGCATTATTTTGATTGTTTTGCAGACTCTGCCATAAGGAAAGCCATATTAGGACACATAGTTATTCCTAGGTGTGACTATCAAGCAGGACATAATAAGGTAGGATCTCTACAGTACTTGGCACTAACAGCATTAATAAAGCCAAAAAAGATAAAGCCACCTCTGCCTAGTGTTAGGAAATTAGTAGAGGATGGATGGAACAACCCCCAGAAGACCAGGGGCCGCAGAGGGAACCATACAATGAATGGACACTAGAGATTCTAGAGGAACTCAAGCAGGAAGCTGTTAGACACTTTCCTAGACCATGGCTCCATAACTTAGGACAGCATATCTATGAAACCTATGGGGATACTTGGACAGGAGTAGAAGCTATAATAAGAATACTGCAACAACTACTGTTCATTCATTTCAGAATTGGGTGCCAGCATAGCAGAATAGGCATTTTGCGACAAAGAAGAGCAAGAAATGGAGCCAGTAGATCCTAACCTAGAGCCCTGGAACCATTCAGGAAGTCAGCCTAAAACTCCTTGTAATAAGTGCTATTGTAAACGCTGTAGCTACCATTGTCTAGTTTGCTTTCAGACGAAAGGCTTAGGCATTTCCTATGGCAGGAAGAGGCGGAGACAGCGACGAAGCACTCCTCCAAGCAGTGAGGATCATCAAGATCCTATATCAAAGCAGTAAGTATATGTAATGTTTAGTTTACTAGACAGAGTAGATGCTAGATTAGGGGTAGGAGCTCTAATAGTAGCATTAATCTTAGCAATAGTTGTGTGGGTCATAGTATATATAGAATATAGGAAATTGGTAAGACAGAGAAAAATAGATAGGTTAATTGAAAGAATTAGGGAAAGGGCAGAAGACAGTGGCAATGAGAGTGAGGGGGATGTCGAGGAATTGTCCACAATGGTGGATATGGGGCATCTTAGGCTTTTGGATGATAATAACTTGTAAGGTAATGGGGAGCTTGTGGGTCACAGTCTATTATGGGGTACCTGTGTGGAGAGAAGCAAAAACTACTCTATTCTGTGCATCAGATGCTAAAGCATATGAGAAAGAAGTGCATAATGTCTGGGCTACACATGCCTGTGTACCCACAGACCCCAACCCACAAGAAATACTTTTGAATGTAACAGAAAATTTTAACATGTGGGAAAATGACATGGTGGATCAGATGCATGAGGATATAATCAGTTTATGGGATGAAAGTCTAAAGCCATGTGTAAAGTTGACCCCACTCTGTGTCACTTTAAATTGTACTACCAGAAGGACCAACCATACTACCCAAGAAATGAAAAATTGCACTTTTAATGCAACCACAGAAATAAAGGATAAGACACAGAGAGTGCATGCACTTTTTTATAGAACTGATGTAGTACCACTTAATGAGGAAAAGAATAATTCTAGTAATGAGTATATATTAATAAATTGCAATACCACAACCATAACACAAGCCTGTCCAAAGGTCACTTTTGACCCAATTCCTATACATTATTGTGCTCCAGCTGGTTATGCGATTCTAAAGTGTAATGATAATAAATTCAATGGGAAAGGACCATGCAATAATGTCAGCACAGTACAATGTACACATGGAATTAAGCCAGTGGTATCAACTCAATTACTGTTAAATGGTAGCCTAGCAGAAGAGGAGATAATAATTAGATCTAAAAATCTGACAAACAATGTCGACACAATAATAGTACACCTTAACAGTACTACATCTGTAGATATTATGTGTACAAGACCCGGCAATAACACAAGACAAAGTACAAGGATAGGACCAGGACAAACATTCTATGCAAGAGGTGACATAATAGGAGACATAAGACAAGCACATTGTAACATTACTAGAAGTAACTGGACCAACACTTTAAAAAAGGTACGGGAAAAATTAAGAGAACACTACCCTAATACAACAATAGACTTTAAACCACACTCAGGAGGGGATCTAGAAGTTACAACACATATTTTTAATTGTAGAGGAGAATTTTTCTATTGTGATACAACAGAACTGTTTAATTCAACAGAACAGTCTAGTACAACAGAAGAGGAGAATAAGAATAATAATACAATCACACTCCAATGCAGAATAAAACAAATTGTAAACATGTGGCAGGGGGTAGGAAGAGCAATGTATGCCCCTCCCATTGCAGGAAATATAACATGTAACTCAACCATCACAGGATTACTATTGACACGTGATGGTGGAATAATCAATAACACAGAAGGTAACAAAACAGAGACATTCAGACCAGGAGGAGGAGATATGAGGGACAATTGGAGAGGTGAATTATATAAATATAAAGTGGTAGAAATTAGACCATTGGGAATAGCACCCACTGAGGCAAAAAGGAGAGTGGTGGAGAGAGGAAAAAGAGCAGTGGGAATAGGAGCTGTGCTCTTTGGGTTCTTGGGAGCAGCAGGAAGCACTATGGGCGCGGCGTCAGTGGCGCTGACGGTACAGGCCAGACAACTGTTGACTGGCATAGTGCAACAGCAAAGTAATTTGCTGAGGGCTATAGAGGCGCAACAGCATATGTTGCAACTCACGGTCTGGGGCATTAAGCAGCTCCAGACAAGAGTCCTGGCTATAGAAAGATACCTAAAAGATCAACAGCTCCTAGGGCTTTGGGGATGCGCTGGAAAAACCATTTGCACCACTGCTGTACCGTGGAACTCCAGTTGGAGTAATAGAAGTCACGATCAGATCAAAGACATTTGGAATAACCTGACATGGATGGAGTGGGAAAGAGAAATTAGTAATTACACATACACAATATACCAGTTGCTTGAAGACTCGCAAATCCAGCAGGAGAAAAATGAAAAAGATTTATTAGCATTGGACAGTTGGAACAATCTATGGAATTGGTTTGACATAACAAAATGGCTGTGGTATATAAAAATATTCATCATGATAGTAGGAGGCTTAATAGGCTTAAGAATAATCTTGGGAGTGATCTCTATAGTGAGAAGAGTTAGGCAGGGATACTCACCTTTGTCGTTTCAGACCCTTATCCCAAACTCGAGGGAACCACCCGACAGGCTCGGAAGAATCGAAGAAGAAGGTGGAGAGCAAGACAGAGACAGATCCATTCGATTAGTGAGCGGATTCTTAGCGCTTGCCTGGGACGACCTGCGGAGCCTGTGCCTCTTCCTCTACCACCACTTGAGAGACTTCATATTGGTGACAGCGAGAGCAGTGGAACTTCTGGGACGCAGCAGTCTCAGGGGACTACAGAGAGGGTGGGAAGTCCTTAAGTATCTGGGAAATCTTGTACAGTATTGGGGTCTGGAACTAAAAAAGAGTGCTATTAGTCTGCTTGATACCATAGCAATAGCAGTAGCTGAAGGAACAGATAGGATTATTGAAATAGTACAAATAATTGTTAGAGCTATCTGCAACATACCTACAAGAATAAGACAGGGCTTGGAAACAGCTTTGCTATAAAATGGGGGGCAAGTGTTCAAAAAGCAGCAGAGCTGGATGGGCTGTTGTAAGAGAAAGAATGAGACGAACTAGGCCAGCAGCAGAGAGAGCAGCAGAAGGAGTAGGAGCAGCATCCCAAGACTTAGATAAACATGGAGCACTTACAAGTAGCAACACAGCCCACAATAATGCTGATTGTGCCTGGCTGCAAGCACAGGAGGAGGA
>C.ZA.04.04ZASK164B1_DQ056405_K.CD.97.EQTB11C_AJ249235
TCTGTTGTGTGACTCTGGTAACTAGAGATCCCTCAGACCCTTGTTGGTAGTGTGGAAAATCTCTAGCAGTGGCGCCCGAACAGGGACGCGAAAGCGAAAGTGAGACCAGAGAAGATCTCTCGACGCAGGACTCGGCTTGCTGAAGTGCACTCGGCAAGAGGCGAGAGCGGCGGCTGGTGAGTACGCCAATTTTTATTTGACTAGCGGAGGCTAGAAGGAGAGAGATGGGTGCGAGAGCGTCAATATTAAGAGGGGGAAAATTAGATACATGGGAAAAAATTAAGTTAAGGCCAGGGGGAAAGAAACATTATATGCTAAAACATTTAGTATGGGCAAGCAGGGAGCTGGAAAGATTTGCACTTAACCCTAGCCTTTTAGAAACAGAGGAAGGATGTAAACAAATAGTAAAACAGCTCCAACCATCTCTTCAGACAGGAACAGAGGAACTTAGATCATTATTCAACACAGTAGCAGTTCTCTATTGTGTACATAAAGGGATAAAGGTACTAGACACCAAGGAAGCCCTAGACAAGATAGAGGAAGAACAAAACAAATGTCAGCAAAAAACAAAGCAGGCAGAAAAAGCGGCTGACGGGAAGGTCAGTCAAAATTATCCTATAGTGCAGAATCTACAAGGGCAAATGGTACATCAAGCCATATCACCTAGAACTTTGAATGCATGGGTAAAAGTAATAGAGGAAAAGGGCTTTAACCCTGAGGTAATACCCATGTTTACAGCATTATCAGAAGGAGCCACCCCACAAGATTTAAACACCATGTTAAATACAGTAGGGGGACATCAAGCAGCCATGCAAATGTTAAAGGATACCATCAATGAGGAGGCTGCAGAATGGGATAGAGTACATCCAGTGCATGCAGGGCCTATTGCACCAGGCCAAATGAGAGAACCAAGGGGAAGTGACATAGCAGGAACTACTAGTACCCTTCAGGAACAAATAGGATGGATGACAAACAACCCGCCTATCCCAGTGGGAGACATCTATAAAAGATGGATAATTCTGGGGTTAAATAAGATAGTAAGAATGTATAGCCCTGTTAGCATTTTGGACATAAAACAAGGGCCAAAGGAACCCTTTAGAGACTATGTAGATCGGTTCTTTAAAACTTTAAGAGCTGAACAAGCTACACAAGATGTAAAGAATTGGATGACAGACACCTTGTTGGTCCAAAATGCGAACCCAGATTGTAAGACCATTTTAAGAGCATTAGGACCAGGGGCTACATTAGAAGAAATGATGACAGCATGTCAAGGAGTGGGAGGGCCTAGCCACAAGGCAAGAGTGTTGGCTGAGGCAATGAGCCAAGCAAACAATACAAACATAATGATGCAGAGAAGCAATTTCAAAGGCCCTAGAAAAATTATTAAATGTTTCAACTGTGGCAAGGAAGGGCACATAGCCAAAAATTGCAGGGCCCCTAGAAAAAAGGGTTGTTGGAAATGTGGAAAGGAAGGACACCAAATGAAAGACTGTACTGAAAGACAGGCTAATTTTTTAGGGAAAATCTGGCCTTCCCACAAGGGGAGGCCAGGGAACTTCCTTCAGAGCAGACCAGAGCCTTCAGCTCCACCAGCAGAGAGCTTCAGGTTCGAGGAGACAACCCCTGCTCCGAAGCAGGAGCCGAAAGACAGGGAACCCTTAACTTCCCTCAAATCACTCTTTGGCAGCGACCTGTTGTCTCAATAAAAGTAGAGGGCCAGATAAAGGAGGCTCTCTTAGACACAGGAGCAGATGATACAGTATTAGAAGAAATAAGCTTGCCAGGAAAATGGAAACCAAAAATGATAGGAGGAATTGGAGGTTTTATCAAAGTAAGACAGTATGATCAAATATCTATAGAAATTTGTGGAAAAAAGGCTATAGGTACAGTATTAGTAGGACCTACACCTGTCAACATAATTGGAAGGAATTTGTTGACTCAGCTTGGCTGCACTTTAAATTTTCCAATCAGTCCTATTGAAACTGTACCAGTAAAATTAAAACCAGGAATGGATGGCCCAAAGGTTAAACAATGGCCATTGTCAGAAGAAAAAATAAAAGCATTAACAGAAATTTGTCAAGACATGGAAAAGGAAGGAAAAATTACCAAAATTGGGCCTGAAAATCCATATAATACTCCAGTATTTGCTATAAAAAAGAAGGACAGTACTAAGTGGAGAAAATTAGTAGATTTCAGGGAACTTAATAAAAGAACTCAAGACTTTTGGGAGGTTCAATTAGGAATACCGCACCCAGCAGGGTTAAAAAAGAAAAAATCAGTAACAGTATTGGATGTGGGGGATGCGTATTTTTCAGTTCCTTTAGATGAAAGCTTCAGGAAATACACTGCATTCACCATACCTAGTATAAACAATGAAACACCAGGGATTAGATATCAATACAATGTGCTTCCACAGGGATGGAAAGGATCACCAGCAATATTCCAGAGTAGCATGACAAAAATCTTAGAGCCCTTTAGGGCACAAAACCCAGACATAGTCATCTATCAATACATGGATGATTTGTATGTAGGCTCTGATTTAGAAATAGGGCTACATAGAGAAAAAATAGAGCAGTTAAGAGACCATCTATTAAAGTGGGGATTTACCACACCAGGCAAGAAACATCAGAAAGAACCCCCATTTCTTTGGATGGGGTATGAACTCCATCCTGATAAATGGACAGTACAGCCTATACAGCTGCCAACAAAGGATAGCTGGACTGTCAATGATATACAGAAGTTAGTGGGAAAATTAAACTGGGCAAGTCAGATTTACCCAGGGATTAAGGTAAGGCAACTTTGTAAACTCCTTAGGGGAACTAAAGCACTAACAGACATAGTACCACTAACTGAAGAAGCAGAATTAGAATTGGCAGAGAACAGAGAGATTCTAAAAGAACCAGTACATGGGGTTTATTATGACCCATCAAAAGACTTGATAGCTGAAATACAGAAACAGGGACATGATCAATGGACATATCAAATTTACCAGGAACCATTCAAGAATCTAAAAACAGGAAAGTATGCAAAAATGAGAACTGCCCACACTAATGATGTAAAACAGTTAACAGAGGCAGTGCAGAAAATAGCCTTAGAAAGCATAGTAATATGGGGAAGGACTCCTAAATTTAGACTGCCCATCCAAAAAGAAACATGGGAGACATGGTGGACGGACTATTGGCAAGCCACCTGGATTCCTGAGTGGGAGTTTGTTAATACCCCTCCCCTAGTAAAATTATGGTACCAGCTGGAAAAGGATCCCATGATCGGAGTAGAAACTTTCTATGTAGATGGAGCAGCTAATAGGGAAACTAAATTAGGAAAAGCAGGGTATGTTACTGACAGAGGAAGACAAAAAGTTATTTCTCTAACTGAAACAACAAATCAGAAGACTGAATTACAAGCAATTCTGCTAGCCTTGCAAGATTCAGGATCAGAAGTAAACATAGTAACAGACTCACAATATGCATTAGGGATCATTCAAGCACAACCAGATAAGAGTGAGTCAGAACTAGTCAACCAAATAATAGAACAACTAATAAACAAGGAAAAAGTTTACCTGTCATGGGTACCAGCACATAAAGGAATTGGAGGAAATGAACAAGTAGATAAACTAGTAAGTACTGGAATCAGGAAAGTGCTATTTTTAGATGGAATAGATAAGGCTCAAGAAGAGCATGAAAAGTATCACAGCAATTGGAGAGCAATGGCTAGTGATTTTAATCTACCACCCATAGTAGCAAAAGAAATAGTAGCCAGCTGTGACAAATGTCAGCTAAAAGGGGAAGCCACACATGGACAGGTAGATTGTAGCCCAGGGATATGGCAATTAGATTGTACACATTTAGAAGGAAAAGTCATTCTGGTAGCAGTCCACGTAGCCAGTGGCTATATAGAAGCAGAGGTTATCCCAGCAGAAACAGGACAAGAAACAGCATACTATATACTAAAATTAGCAGGAAGATGGCCAGTCAAAGTAATACATACAGACAATGGCAGTAATTTCACCAGTACTGCAGTTAAGGCAGCCTGCTGGTGGGCAGGTATCCAACAGGAATTTGGAATTCCCTACAATCCCCAAAGTCAGGGAGTAGTAGAATCCATGAATAAAGAATTAAAGAAAATCATAGGGCAGGTAAGAGAGCAAGCAGAGCACCTTAAGACAGCAGTACAAATGGCAGTATTCATTCACAATTTTAAAAGAAAAGGGGGGATTGGGGGGTACAGTGCAGGGGAAAGAATAATAGATATAATAGCAACAGACATACAAACTAAAGAATTACAAAAACAAATTACAAAAATTCAAAATTTCCGGGTTTATTACAGAGACAGCAGAGACCCTATTTGGAAAGGACCAGCCAAACTACTCTGGAAAGGTGAAGGGGCAGTAGTAATACAAGATAACAGTGACATAAAGGTAGTACCAAGGAGGAAAGCAAAGATCATTAAGGACTATGGAAAACAGATGGCAGGCGCTGATTGTGTGGCAGGTAGACAGGATGAGGATCAGAACATGGAATAGTCTAGTGAAACACCATATGTATACTTCAAAGAGAGCTAAAGGATGGTATTACAGACACCATTATGAAAGCAGACATCCAAAAGTAAGTTCAGAAGTACACATCCCATTAGGAGAGGCTAGATTAGTAATAACAACATATTGGGGTTTACAAACAGGAGAAAGAGAATGGCATTTGGGTCATGGAGTCTCCATAGAATGGAGATTGAGAAGATATAGCACACAAGTAGACCCTGGCCTGGCAGACCAGCTAATTCATATGTACTATTTTGATTGTTTTGCAGACTCTGCCATAAGAAAAGCCATATTAGGACACATAGTTATTCCTAGGTGTGACTATCAAGCAGGACATAATAAGGTAGGATCTCTACAATACCTGGCACTGACAACATTGATAAAACCAAAAAGGATAAAGCCACCTCTGCCTAGCACTAGGAAATTAGTAGAGGATAGATGGAACAAGCCCCAGAAGACCAGGGACCGCAGAGGGAACCATACAATGAATGGACACTAGAGATTCTAGAGGAACTCAAGCAGGAAGCTGTCAGACATTTTCCTAGACCATGGCTCCATAGCTTAGGACAATATATTTATGAAACCTATGGAGATACTTGGGCAGGAGTCGAAGCTCTGCTAAGAATACTGCAACAGATGCTGTTTATTCATTTCAGAATTGGGTGCCATCATAGCAGAATAGGCATTTTGCAACACAGAAGAGCAAGAAATGGAGCCAGTAGATCCTAACCTAGAGCCCTGGAACCATCCGGGAAGTCAGCCTAAAACTCCCTGTAACCCATGCTATTGTAAAAAATGCAGCTATCATTGTTTAGTTTGCTTTCAGACAAAAGGCTTAGGCATTTACTATGGCAGGAAGAAGCGGAGACAGCAGCGACGAAGCGCTCCTCCAAGCAGTAAGGATCATCAAAATCCTATATCAAAGCAGTAAGTACCATATAGTGGATGTAATGGTAACTCCATCAGAAGTAGGAGTAATAGCAGCATTTATATTAGCACTAATCCTAGCAATAGTTGTGTGGACTATAGTATATCTAGAATATAGGAAAATAGTAAAACAAAGAAAAATAGATTGGTTAATTGAAAGAATTAGGGAAAGAGCAGAAGACAGTGGCAATGAGAGTGAGGGGGACACTGAGGAATTGGCAGCAATGGTGGATATGGGGCAGCTTAGGCTTTTGGATGTTAATGGTGTGTAGTGTGGTGGGAAACTTGTGGGTCACAGTCTATTATGGGGTACCTGTGTGGAGAGAAGCAAAAACTACTCTATTCTGTGCATCAGATGCTAAAGCATATGAGAGAGAAATACATAATGTATGGGCTACACATGCCTGTGTACCCACAGACCCCAACCCGCAAGAAATAGTTTTGGAAAATGTGACAGAAAATTTTAACATGTGGAAAAATGACATGGTGGATCAAATGCATGAAGATATAACCAGTTTATGGGATGAAGGCCTAAAGCCATGTGTAAAATTGACCCCACTCTGTGTCACTCTAGATTGTGTTGATGTTAAGGTTAATGTTACCAAGAATAATACCAGTAATGGTACTACTACCCCTAGTACTACTACCCCTACCCCCAATATGGACACGGGGGGAATGAAAAATTGCTCTTTCAATATAACCACAGAACTAAGAGATAAGGAAAAGAAAGTGAATGCACTTTTTTATAGACTTGATATAGTTCCACTGAAGACTAATGAGCCTAATAGCACTGATTATAGATTAATAAATTGTAATACTTCAACCATAGCACAAGCCTGTCCAAAGATTTCTTTTGATCCAATTCCTATACATTATTGTGCTCCAGCTGGCTTTGCGATTCTAAAGTGTAATAATAACACATGCAATGGAACAGGGCCATGCACAAATGTCAGCACAGTACAATGTACACATGGAATTAAACCAGTGGTATCAACTCAATTGCTATTAAATGGCAGCCTAGCAGAAGAAGAGATAATTATTAGGTCTGAAGATATTACAAAGAATACAAAAAACATAATAGTACAGCTTAATGAAGCTGTAGAAATTAATTGTACAAGGCCAAGCAACAATACAAGAAAAAGTATAAGGATAGGACCAGGACAAACATTCTATGCAACAGGAGAAATAATAGGAGACATAAGACAAGCACACTGTAACATTAGTAAAAAAGCATGGAATGAAATCCTACAAAAGGTAAAGGAAAAATTAAAAGAACATTTCTCTGATAAAGAAATAAACTTTAACCATTCCTCAGGGGGGGACCTAGAAGTTACAATGCACACATTTAATTGTGGAGGAGAATTTTTCTATTGCAATACATCACAGTTGTTTAATACATCATATGTGTTTAATAATACTGCTAATAATACAGAGGCAAATCAAAACATCACACTGCCATGCAGAATAAAACAAATTATAAACATGTGGCAGGAGGTGGGACGAGCAATATATGCCCCTCCCATTGCAGGAAAAATAACATGTAAATCAAATATCACAGGGTTACTATTGACACGTGATGGAGGAAATTCAAACGATACTAATAACACAGAGATATTCAGACCTGCAGGAGGAGATATGAGGGACAATTGGAGAAGTGAACTATATAAATATAAAGTGGTAGAAATTAAGCCGCTAGGAGTAGCACCCACAGAGGCAAAAAGGGGAGTGGTGGAGAGAGAAAAAAGAGCAGTAGGAATAGGAGCTGTGTTCCTTGGGTTCTTGGGAGCAGCAGGAAGCACTATGGGCGCAGCATCAATAACGCTGACGGTACAGGCCAGACAATTGTTGTCTGGAATAGTGCAACAGCAAAGCAATTTGCTGAGGGCTATAGAGGCGCAACAGCATCTGCTGCAACTCACAGTCTGGGGCATTAAGCAGCTCCAGACAAGAATCCTGGCTGTAGAAAGATACCTAAAGGATCAACAGCTCCTAGGGTTGTGGGGCTGCTCTGGAAAACTCATCTGCACCACCTCTGTGCCTTGGAACACCAGTTGGAGTAATAAATCTTATACAGATATTTGGGATAACATGACCTGGATGCAGTGGGATAGAGAAATTGATGATTACACAGAAACAATATACAGGTTGCTTGAAGAATCGCAAAACCAGCAGGAACGAAATGAAAAAGATTTATTAGCATTGGACAGTTGGAACAATCTGTGGAATTGGTTTAATATATCAAACTGGTTGTGGTATATAAAAATATTTATAATGATAGTAGGAGGCTTGATAGGTTTGAGAATAATTTTTGCTGTGCTAGCTATAGTAAACAGAGTTAGGCAGGGATACTCACCTCTGTCGTTGCAGATCCCTTCCCAGAACCCAAGGGGACTCGACAGGCTCGGAAGAATCGAAGAAGGAGGTGGAGAGCAAGACAAAGAGAGATCAATTCGATTAGTGAGCGGATTCTTAGCACTTGCCTGGGACGACCTGCGGAGCCTGTGCCTTTTCAGTTACCACCAATTGAGAGACTTCATATTGGTGATAGCGAGAACCTTGGAACTTCTGGGACGCAGGGGGTGGGAAACCCTTAAGTATCTGGGAAGCCTTATACAGTATTGGGGTCTAGAGCTAAAAAGGAGTGCTATTAGTCTGCTTGATACCATAGCAATAACAACAGCTGAGGGAACAGATAGGATTATAGAACTAGTGCTAAGAATTTGTAGAGCTATCCGCAACATACCTGCAAGAATAAGACAGGGCTTTGAAGCAGCTTTGCTATAAAATGGGAGGCAAGTGGTCAAAAAGCAGTATAGTTGGATGGCCTGCTATAAGGGAAAGAATAAGAAGAACTAGGCCAGCAGCAGAGGGAGCAGGAGCAGCAGAAGGAGTAGGAACAGCATCTCAAGACTTAGACAAACATGGAGCACTTACAACCAGCAACACAGCCACCAATAATGCTGCCTGTGCCTGGCTGGAAGCGCAAGAGGAGGA
>D.UG.99.99UGA03349_AF484518_F1.BE.93.VI850_AF077336
GCGAGAGCGTCAGTATTAAGCGGGGGAAAATTAGATGAATGGGAAAAAATTCGGTTACGGCCAGGAGGAAACAAAAAATATAGACTAAAACATTTAGTATGGGCAAGCAGGGAGCTAGAACGATTTGCAATTAATCCTGGTCTTTTAGAAACATCAGAAGGCTGTAGACAAATAATAGAACAGCTACAACCAGCCATTCAGACAGGATCAGAGGAACTTAAATCATTACATAATACAGTAGTAACCCTCTATTGTGTACATGAAAGGATAAAGGTAGCAGATACCAAGGAAGCTTTAGATAAGGTAAAGGAAGAACAAACCAAAAGTAGGAAAAAAGCACAGCAAGCAACAGCTGACAGCAGCCAGGCCAGCCAAAATTATCCTATAGTACAAAACCTACAGGGGCAAATGGTACACCAGTCCTTATCACCTAGGACTTTGAATGCATGGGTAAAAGTAATAGAAGAGAAGGCTTTCAGCCCAGAAGTAATACCCATGTTTTCAGCATTATCAGAAGGAGCCACCCCAACAGATTTAAACACCATGCTAAACACAGTAGGGGGACATCAAGCAGCCATGCAAATGTTAAAAGAGACTATCAATGAGGAAGCTGCAGAATGGGATAGGCTACATCCAGTGCCTGCAGGGCCTGTTGCACCAGGCCAAATGAGAGAACCAAGGGGAAGTGATATAGCAGGAACTACCAGTACCCTTCAGGAACAAATAGGATGGATGACAAGCAATCCACCTATCCCAGTAGGAGAAATCTATAAAAGATGGATAATCCTAGGATTAAATAAAATAGTAAGAATGTACAGCCCTGTCAGCATTTTAGACATAAGACAAGGACCAAAGGAACCCTTTAGAGACTATGTAGATCGGTTCTATAAAACTCTACGAGCCGAGCAAGCTTCACAGGATGTAAAAAATTGGATGACTGAAACCTTGTTAGTCCAAAATGCGAATCCAGATTGTAAAACTATCTTAAAAGCATTGGGACCAGCGGCTACATTAGAGGAAATGATGACAGCATGTCAGGGAGTGGGGGGACCCAGTCATAAAGCAAGAGTTTTGGCTGAGGCAATGAGCCAAGCATCAAACACAAATGCTGTTATAATGATGCAGAGGGGCAATTTCAAGGGCAAGAAAATCATTAAGTGTTTCAACTGTGGCAAAGAAGGACACCTAGCAAAAAATTGTAGGGCTCCTAGGAAAAGAGGCTGTTGGAAATGTGGAAAGGAAGGGCACCAAATGAAAGATTGTAATGAAAGACAGGCTAATTTTTTAGGGAGAATTTGGCCTTCCCACAAGGGGAGGCCAGGGAATTTCCTTCAGAGCAGACCAGAGCCAACAGCCCCACCAGCAGAGAGCTTCGGGTTTGGGGAAGAGATAACACCCTCCCAGAAACAGGAGGGGAAAGAGGAGCTGTATCCTTCAGCCTCCCTCAAATCACTCTTTGGCAACGACCCCTAGTCACAATAAAAATAGGGGGACAGCTAAAAGAAGCTCTATTAGATACAGGAGCAGATGATACAGTAGTAGAAGAAATGAATTTGCCAGGAAAATGGAAACCAAAAATGATAGGGGGAATTGGGGGCTTTATCAAAGTAAGACAGTATGATCAAATACCCATAGAAATCTGTGGATATAAGGCTACAGGTACAGTATTAGTAGGACCTACACCTGTCAACATAATTGGAAGAAATTTGTTGACTCAGATTGGTTGCACTTTAAATTTTCCAATTAGTCCTATTGAAACTGTACCAGTAAAATTAAAGCCAGGGATGGATGGTCCAAGAGTTAAACAATGGCCATTGACAGAAGAGAAAATAAAGGCACTAATAGAAATTTGTACAGAAATGGAAAAGGAAGGAAAAATTTCAAGAGTTGGACCTGAAAATCCATACAATACTCCAATATTTGCCATAAAGAAAAAAGACAGTACTAAGTGGAGAAAATTAGTAGATTTCAGAGAACTTAATAAGAGAACTCAAGATTTCTGGGAAGTTCAACTAGGAATACCACATCCTGCAGGGCTAAAAAAGAAAAAATCAGTAACAGTACTGGATGTGGGTGATGCATATTTTTCAGTTCCCTTATATGAAGACTTTAGAAAATACACTGCATTCACCATACCTAGTATAAACAATGAGACACCAGGAATTAGATATCAGTACAATGTGCTTCCACAAGGATGGAAAGGATCACCGGCAATATTCCAAAGTAGCATGACAAAAATTTTAGAACCTTTTAGAAAACAAAATCCAGAAGTGGTTATCTACCAATACATGGATGATTTGTATGTAGGATCTGACTTAGAAATAGGGCAGCATAGAATAAAAATAGAGGAATTAAGGGGACACCTATTGAAGTGGGGATTTACCACACCAGACAAAAAGCATCAGAAGGAACCTCCATTTCTTTGGATGGGTTATGAACTCCATCCTGATAAATGGACAGTACAGCCTATAAAACTGCCAGAAAAAGAAAGCTGGACTGTCAATGATCTGCAGAAGTTAGTGGGGAAATTAAATTGGGCAAGTCAAATTTACTCAGGAATTAAAGTAAGACAATTATGCAAATGCCTTAGGGGAACCAAAGCACTGACAGAAGTAGTACCACTGACAGAAGAAGCAGAATTAGAACTGGCAGAAAACAGGGAACTTCTAAAAGAAACAGTACATGGAGTGTATTATGACCCATCAAAAGACTTAATAGCAGAAATACAGAAACAAGGGCAAGACCAATGGACATATCAAATTTATCAAGAACAATATAAAAATTTGAAAACAGGAAAGTATGCAAAAAGGAGAAGTACCCACACTAATGATGTAAAACAATTAACAGAGGCAGTGCAAAAAATAGCCCAAGAATGTATAGTGATATGGGGAAAGACTCCTAAATTCAGACTACCCATACAAAAGGAAACATGGGAAACATGGTGGACAGAGTATTGGCAGGCCACCTGGATTCCTGAGTGGGAGTTTGTCAATACCCCTCCCTTGGTTAAATTATGGTACCAGTTAGAGAAGGAACCCATAGTAGGAGCAGAAACCTTCTATGTAGATGGGGCATCTAATAAAGAGACTAAAATAGGAAAAGCAGGATATATTACTGACAAAGGAAGACAAAAGGTTATCTCTCTAACTGACACAACAAATCAGAAGACTGAATTACAAGCCATTAATCTAGCTTTGCAGGATTCGGGACTAGAAGTAAACATAGTAACAGACTCACAATATGCATTAGGAATCATTCAAGCACAACCAGATAAGAGTGAATCAGAGATAGTCAATCAAATAATAGAGCAGTTAATAAACAAGGAAAAGGTCTACCTATCATGGGTACCAGCACATAAGGGGATTGGAGGAAATGAACAAATAGATAAATTAGTCAGTAATGGGATTAGGAAAATACTCTTCTTGGATGGGATAGATAAGGCACAAGAAGAACATGAGAAATACCACAACAATTGGAGAGCAATGGCTAGTGATTTTAACCTGCCACCTGTGGTAGCAAAAGAAATAGTAGCTAGCTGTGATAAATGTCAGCTAAAAGGAGAAGCCTTGCATGGGCAAGTAGACTGTAGTCCAGGAATATGGCAATTAGATTGCACACATTTAGAAGGAAAAGTTATCCTGGTAGCAGTCCATGTAGCCAGTGGCTATATAGAAGCAGAAGTTATTCCAGCAGAAACAGGGCAGGAAACAGCCTACTTTCTCTTGAAATTAGCAGGAAGATGGCCAGTAAAAGTAGTACATACAGACAATGGCAGCAATTTCACCAGCGCTGCACTTAAGGCCGCCTGCTGGTGGGCAGGTATCAAGCAGGAATTTGGAATTCCCTACAATCCCCAAAGTCAAGGAGTAGTAGAATCTATGAATAAAGAATTAAAGAAAATTATAGGACAGGTAAGAGATCAAGCTGAACATCTTAAGACAGCAGTACAAATGGCAGTATTCATCCACAATTTTAAAAGAAAAGGGGGGATTGGGGGGTACAGTGCAGGGGAAAGAATAATAGATATAATAGCAACAGACATACAAACTAAAGAATTACAAAAACAAATCACAAAAATTCAAAATTTTCGGGTTTATTACAGGGACAACAGAGATCCAATTTGGAAAGGACCAGCAAAGCTTCTCTGGAAAGGTGAAGGGGCAGTAGTACTACAAGACAATAGTGAAATAAAGGTAGTGCCTAGGAGAAAAGTAAAGATCATTAGGGATTATGGAAAACAGATGGCAGGTGATGATTGTGTGGCAAGTAGACAGGATGAGGATTAGAACATGGAACAGTTTAGTAAAACATCATATGTATATTTCAAAGAAAGCTCGAGGATGGTTGTATAGACATCACTATGAAAGCCTACACCCAAAAATAAGTTCAGAAGTACACATCCCACTAGGAGACGCTAGACTGGTAGTAAAAACATATTGGGGACTGCATACAGGAGAAAGAGAATGGCATCTGGGTCAGGGAGTCTCCATAGAATGGAGGAAAAGGAGATATGCCACACAAGTAGACCCTGGCTTAGCAGACCAACTAATTCATATATATTATTTTGATTGTTTTACAGACTCTGCTATAAGAAAAGCCATATTAGGACACATAGTTAATCCTAGGTGTAATTATCAAGCAGGACATAACAAGGTAGGATCTTTACAATATTTGGCACTAACAGCATTAATAAACCCTAAAAAGATAAAACCACCTTTGCCTAGCGTTAGGAAGCTGACAGAAGACAGATGGAACGAGCCCCAGAGGACCAAGGGCCACAGAGGGAGCCATACAATGAATGGACATTAGAACTTTTAGAGGAGCTTAAGAGTGAAGCTGTCAGACACTTTCCTAGGGTATGGCTTCACAGCCTAGGGCAATATATCTATGAAACTTATGGGGATACCTGGACAGGAGTTGAAGCTATAATAAGAATCCTTCAACAATTACTGTTTACCCATTTCAGAATTGGGTGTCAGCATAGCAGAATAGGCATTATTCGACAGAGAAGAACAAGAAATGGACCCAGTAGATCCTAACCTAGAGCCCTGGAACCATCCAGGAAGTCAGCCTAAGACTGCTTGTAACTCGTGTCATTGTAAAAAGTGCTGCTGGCATTGTCAACTTTGCTTCATAAAGAAAGGCTTAGGTATCTCCTATGGCAGGAAGAAGCGGAAACAGCGACGAAGACCTCCTAAAGGCGATCAGGCTCATCAAGATCATATACCAAAGCAGTAAGTAGTATATGTAATGCAATCTTTGGAGATATTAGCAATAGTAGCATTAGTAGTAGTACTAATAATAGCAATAGTTGTGTGGACCATAGTATTCATAGAGTGTAGAAGATTAAGAAGACAAAAGAAAATAGACTGGTTAATTGATAGAATAAGAGAAAGAGCAGAAGATAGTGGCAATGAGAGTGAGGGGGATACAGAGGAACTATCAAAACTTGTGGAGATGGGGCACCGTGCTCCTTGGGATGTTGATGATATGTAAGGCTACAGAACAGTTGTGGGTCACAGTTTACTATGGGGTACCTGTGTGGAAAGAAGCAACCACTACTCTATTTTGTGCATCAGATGCTAAATCATATAAAGAAGAAGCACATAATATCTGGGCTACGCATGCCTGTGTACCAACAGACCCCAACCCACGAGAATTAATAATAGAAAATGTCACAGAAAACTTTAACATGTGGAAAAATAACATGGTGGAGCAGATGCATGAGGATATAATCAGTTTATGGGATCAAAGCCTAAAACCATGTGTAAAATTAACCCCACTCTGTGTCACTTTAAACTGCACTGAATGGAGGAAGAATAACACTATCAATGCCACCGAAATAGAAATGAAAAACTGCTCTTTCAATATAACCACAGAACTAAGAGATAGGAAAAAGCAAGTACATGCACTTTTTTATAAACTTGATGTGGTACCAATAGATGATAATAATAGTACTAATACCAGCTATAGGTTAATAAATTGTAATACCTCAGCCATTACACAGGCGTGTCCAAAGGTAAACTTTGAGCCAATTCCCATACATTATTGTGCCCCAGCTGGATATGCGATTCTAAAATGTAACAATAAGAAGTTCAATGGGACAGGTCCATGCAATAATGTCAGTACAGTACAGTGTACACATGGAATTAGGCCAGTAGTGTCAACTCAATTGTTATTGAATGGCAGTCTAGCAGAAGAAGACATAATAATTAGATCTGAAAATCTCACAAATAATGCTAAAATCATAATAGTACAGCTTAATGAGTCTGTAACAATTAATTGCACAAGGCCCTACAACAATACAAGAAAAGGTGTACATATAGGACCAGGGCAAGCATACTATACAACAAAGATAATAGGAGATATAAGACAAGCACATTGCAACATTAGTGGAGCAGAATGGAATAAGACTTTATATCGGGTAGCTAAAAAATTAAGAGACCTATTTAACAAGACAATAATTTTTAAACCATCCTCCGGAGGGGACCCAGAAATTACAACACACAGCTTTAATTGTAGAGGGGAATTTTTCTACTGCAATACAACAGTACTGTTTAATAGCACATGGGAAAATAATAGTACATGGGGTAATGAGAGTGCAATGGGTAATGTCACACTCCCATGCAGAATAAAACAAATTATAAACATGTGGCAGGGAGTAGGAAAAGCAATGTATGCCCCTCCCATTGAAGGACTAATCAGCTGCTCATCAAATATTACAGGATTACTGTTGACAAGAGATGGTGGTGGAAATGAAAGTAGTCAGAATGAGACCTTCAGACCTGGAGGGGGAGATATGAGAGACAATTGGAGAAGTGAATTATATAAATATAAAGTAGTAAGAATTGAACCATTAGGTCTAGCACCCTCCAAGGCAAAAAGAAGAGTAGTAGAAAGAGAGAAAAGAGCAATTGGACTAGGAGCTATGTTCCTTGGGTTCTTGGGAGCAGCAGGAAGCACGATGGGCGCAGCGTCACTGACGCTGACGGTACAGGCCAGACAGCTACTGTCTGGTATAGTGCAACAGCAAAACAATTTGCTGAGGGCTATAGAGGCGCAACAGCACCTGTTGCAACTCACAGTCTGGGGCATTAAACAGCTCCAGGCAAGAGTCCTGGCTGTGGAAAGATACCTAAAGGATCAACAGCTCCTAGGGATCTGGGGCTGCTCTGGAAAACTCATCTGCACCACTAATGTGCCCTGGAACTCTAGTTGGAGTAATAAATCTCAGGAAGAGATTTGGAATAACATGACCTGGATGGAGTGGGAAAAGGAGATTAGCAATTACTCAAACATAATATACAAATTGATTGAAGAGTCACAAAACCAGCAGGAAAAGAATGAACAAGAATTATTGGCATTAGACCAATGGGCAAGTTTGTGGAATTGGTTTAGCATAACAAAATGGCTGTGGTATATAAAAATATTCATAATGATAGTAGGAGGCTTGATAGGCTTAAGGATAGTTTTTGCTGTGCTTTCTATAGTAAATAGAGTTAGGCAGGGATATTCACCTCTGTCGTTTCAGACCCTCCTCCCAGCCCCGCGGGGACCCGACAGGCCCGAAGGAATAGAAGAAGAAGGTGGAGAGCAAGGCAGAGGCAGATCCATTCGATTGCTGAACGGATTATTRGMACTTATCTGGGACGACCTGAGGAACCTGTGCCTCTTCTGCTACCACCGATTGAGAGACTTAATCTTAATTGCRACGAGAGTTGTGGAGATTCTGGGACACAGGGGGTGGGAAGCAATCAAATATYTGTGGAACCTCTTCCAGTATTGGATTCAGGAACTAAAGAATAGTGCTGTTAGCCTGTTTAACACCGCAGCAATAGTAGTAGCTGAGGGGACAGATAGGGTTATAGAAATAGTGCAAAGAGCTGGTAGAGCTGTTCTTAACATACCCAGAAGAATAAGACAGGGCGCGGAAAGGGCTTTACTATAAAATGGGTGGCAAATGGTCAAAAAGTAGTATAGTTGGATGGCCTGCTATAAGGGAAAGAATAAGAAGAACTAATCCAAGAGCAGAAGGGGTGGGAGCAGTAGCAGAAGGGGTGGGAGCCGTATCTCGGGACCTGGAAAGACATGGAGCAGTCACAAGTAGCAATACAAGTCAGACTAATCCAGACTGTGCCTGGGTAGAAGCACAAGAAGAGGGCGACGAGGTGGGTTTTCCAGTCAGACCTCAGGTACCATTAAGACCAATGACTTACAAGGGAGCTTTAGATCTGAGCCACTTTTTAAAAGAAAAGGGGGGACTGGATGGGATGATTTGGTCCCAGCAAAGACAAGATATCCTTGATCTTTGGGTCTACAACACGCAAGGCTTCTTCCCTGATTGGCAAAACTACACACCAGGGCCAGGGATTAGATATCCCCTGACCTTTGGGTGGTGCTTCGAGCTAGTACCAGTTGATCCAAAGGAGACAGAAGAGGACACTGAAGGAGAGACCATCTGCTTGTTACACCCTAAGTGCCAGCATGGAATGGATGACCCGGAGAGAGAAGTGCTGAAGTGGAGATTTAACAGCAAACTAGCCTTTGAACACAAGGCCCGAATAAAGCATCCGGAGTACTACAAAGACTGCTGACACCGAGACTACAAAGACTGCTGACACCGAGTTTTCTACAAGGGACTTTCCGCTGGGGACTTTCCAGGGAGGCGTAACCGGGGAGTGGCTAACCCTCAGATGCTGCATATAAGCAGCTGCTTTTCGCATGTACTGGGTCTCTCTTGTTAGACCAGATTTGAGCCTGGGAGCTCTCTGGTTAGCAAGGGAACCCACTGCT
>D.KR.04.04KBH8_DQ054367_F2.CM.02.02CM_0016BBY_AY371158
TCTGTGGATCTACCACACACAAGGCTACTTCCCTGACTGGCATAACTACACACCAGGGCCAGGGATCAGATATCCACTGACCTTTGGTTGGTGCTTCGAGCTAGTACCAGTTGAAGCAGAGGAGGTAGAAGAGGCCAATGAAGGAGAGAACAACTGCCTGTTACACCCTATGAGCCAGCATGGAATAGAGGACCCGGAGAGACAAGTGCTAAAGTGGAGATTTAACAGCAAACTAGCATTTGAACATAAGGCCCGAATGCTGCATCCGGAGTTTTACAAAGACTGCTGACACTGAGTTTTCTACAGGGGACTTTCCGCGGGGACTTTCCAGAAGAGGCGTGACCTGGGCGGGACTGGGGAGTGGCTAGCCCTCAAATGCTGCATATAAGCAGCTGCTTTCTGCCTGTACTGGGTCTCTCTGGTTAGACCAGATCTGAGCCTGGGAGCTCTCTGGCTAGCTAGGGAACCCACTGCTTAAGCCTCAATAAAGCTTGCCTTAAGCGCCTCAAGTAGTGTATGCCCGTCTGTTGTGTAACTCTGGTAACTAGAGATCCCTCAGACCTCGTTTGTCAGTGTAAAAAATCTCTCGCAGTGGCGCCCGAACAGGGACTTGAAAGCGAAAGTAGAACCAGAGGAGCTCTCCCGACGCAGGACTTGGCTTGCTGAAGCGCGCACAGCAAGAGGCGAGGGGTAGCGACTGGTGAGTACGCTAAAAATTTTTTGACTAGCAGAGGCTAGAAGGGGAAAGATGGGTGCAAGAGCGTCTGTATTAAGCGGGGGAAAATTAGATACATGAGAAAAAATTCGGTTACGGCCAGGAAGAAAAAAAATGTACAAACTGAAACATATAGTATGGGCAAGCAGGGAGCTAAAACGATTTGCACTTAATCCTGGCCTTTTAGAGACATCAAAAGGCTGTAGACAAATAATAGGACAGCTACAACCATCTATACAGACAGGATCAGAAAAACTTAAATCATTATTTAATACAGTAGCAACCCTCTATTGTGTACATGAAAGAATAAATGTAAAGGACACCAAGGAAGCTTTAGACAAAATAGAGGAGGAACAAAACAAAAGTAAAAAAAAAGCACAGCAAGCAACAGCTGACACAAAAAACAACAGCCAGGTCAGCCAAAATTATCCTATAGTGCAAAACCTACAGGGGCAAATGGTACACCAGCCCCTATCACCTAGAACTCTGAACGCATGGGTAAAAGTAGTAGAAGAGAAGGCTTTCAATCCAGAGGTAATACCCATGTTTACAGCATTATCAGAAGGAGCCACCCCACAAGATTTAAATTCCATGCTAAACGCAGTGGGGGGACATCAGGCAGCCATGCAAATGTTAAAAGAGACCATCAATGAGGAAGCTTCAGAATGGGATAGGCTGCATCCAGTGCATGCAGGGCCCATTGCACCAGGTCAACTGAGAGAACCAAGGGGAAGTGATATAGCAGGAACTACTAGTACCCTTCAGGACCAAATAGGATGGATGACAAGCAACCCACCTATCCCAGTAGGAGAAATCTATAAAAGATGGATAATCCTGGGATTAAATAAAATAGTAAGAATGTATAGTCCTGTTGGCATTTTGGACATAAAACAAGGACCAAAAGAACCCTTTAGAGACTATGTAGATCGGTTCTATAAAACTCTAAGAGCCGAGCAAGCTTCACAGGAGGTAAAAAATTGGATGACCGAAACCTTGTTGGTCCAAAATGCGAACCCAGATTGTAAGACTATCTTAAAAGCATTGGGAGCAGGAGCTTCATTAGAAGAAATGATGACAGCATGTCAGGGAGTGGGGGGACCCAGTCATAAAGCAAGAGTTTTGGCTGAAGCAATGAGCCAAGCAACAAGTTCAAATGCAGCCATAATGATGCAGAGAGGCAATTTTAAGGGCCCAAGAAAAATAGTTAAGTGTTTCAATTGTGGCAAAGAAGGACACATAGCAAAAAATTGCAGGGCCCCTAGAAAAAGGGGCTGTTGGAAATGTGGAAAGGAAGGACACCAAATGAAAGATTGCACTGAAAGACAGGCTAATTTTTTAGGGAAGATCTGGCCTTCCCACAATGGAAGGCCAGGAAACTTCCCTCAGAGCAGAACAGAGCCAACCGCCCCACCAGCAGAGAGCTTCGGGTTTGGGGAGGAGATAACCCCCTCTCAGAAACGGGAGCAGAAAGACAACGAACTGTATCCCTTGGATTCCCTCAAATCACTCTTTGGCAACGACCCCTTGTCAAAGTAAAGATAGGGGGACAGATAAAGGAAGCTCTATTAGATACAGGAGCAGATGATACAGTATTAGAAGACATAGAATTGCCAGGAAAATGGAAACCAAAAATGATAGGGGGAATTGGAGGTTTTATTAAAGTAAGACAGTATGATCAAATACTCATAGAAATCTGTGGACATAAAGCTATAGGTACAGTATTAGTAGGACCTACACCTGTCAACATAATTGGAAGGAATCTGTTGACTCAGATTGGCTGCACTTTAAATTTTCCAATTAGTCCTATTGAGACTGTACCAGTAAAGTTAAAGCCAGTGATGGATGGGCCAAGAGTTAAACAATGGCCATTGACAGAAGAAAAAATAAAAGCATTAACAGAAATTTGTACAGAGATGGAAAAGGAAGGAAAAATTTCAAGAATTGGGCCTGAAAATCCATACAATACACCAGTATTTGCCATAAAGAAAAAGGACAGTACTAAGTGGAGAAAATTAGTAGATTTCAGAGAACTTAATAAAAGAACTCAAGACTTCTGGGAAGTTCAGTTAGGAATACCGCACCCTGCAGGGCTAAAAAAGAAAAAATCAGTAACAGTACTGGATGTGGGTGATGCATATTTCTCAGTTCCCTTAGATGAAGACTTTAGAAAGTATACCGCATTCACCATACCTAGTATCAACAATGAGACACCAGGGATTAGATATCAGTACAATGTGCTTCCACAGGGATGGAAAGGATCACCAGCAATATTCCAAAGTAGCATGACAAAAATCTTAGAGCCCTTTAGAAAACAAAATCCAGAAATAGTTATATATCAATACATGGATGATCTGTATGTAGGATCTGACTTAGAAATAGGGCAGCATAGAGCAAAAATAGAGAAATTAAGGGAACATCTGTTGAAGTGGGGATTGACCACACCAGACAAAAAACATCAGAAGGAGCCTCCATTTCTTTGGATGGGTTATGAACTCCATCCTGATAAATGGACAGTACAGCCTATAACACTACCAGAAAAAGAAAGCTGGACTGTCAATGATATACAGAAGTTAGTGGGAAAATTAAATTGGGCAAGTCAAATTTATGCAGGAATTAAAGTAAAACAGTTGTGTAAACTCCTCAGGGGAGCCAAAGCACTGACAGAAGTAATACCACTGACAAAAGAAGCAGAATTAGAACTGGCAGAAAACAGGGAGATTCTAAAAGAACCAGTACATGGAGTGTATTATGATCCATCAAAAGACTTAATAGCAGAATTACAGAAACAAGGGCAAGGCCAATGGACATATCAAATATATCAAGAGCCATTTAAAAATTTGAAGACAGGAAAGTATGCAAAAATGAGGGGTACCCACACTAATGATGTAAAACAATTAACAGAGGCAGTGCAAAAAATAGCCCAAGAAAGCATAGTAATATGGGGAAGGACTCCTAAATTTAGATTACCCATACAAAAGGAAACATGGGAAGCATGGTGGACAGAATATTGGCAGGCCACCTGGATTCCTGAGTGGGAGTTTGTCAACACCCCTCCTTTAGTAAAATTATGGTACCAGTTAGAGAGGGAACCCATAATAGGAGCAGAAACTTTCTATGTAGATGGGGCAGCTAATAGAGAGACTAGATTAGGAAGAGCAGGATATGTTACTGACAGAGGAAGACAAAAAGTTATCCCTTTAACTGACACAACAAATCAGAAGACTGAGTTACAAGCAATTAATCTAGCTTTGCAGGATTCGGGATTAGAAGTAAACATAGTAACAGATTCACAATATGCCTTAGGAATCATCCAAGCACAACCAGATAAGAGTGAATCAGAGTTAGTCAGTCAAATAATAGAACAGTTAATAAAAAAGGAAAAGGTCTACCTGGCCTGGGTACCAGCACATAAAGGGATTGGAGGAAATGAGCAAGTAGATAAATTAGTCAGTAATGGCATTAGGAAAGTACTATTTTTGGATGGAATAGACGAGGCTCAAGAAGACCATGAGAAATATCACAGCAATTGGAGAGCAATGGCTAGTGAGTTTAACCTGCCACCTGTGGTAGCAAAAGAAATAGTAGCTTGCTGTGATAAATGTCAGCAAAAAGGAGAAGCCATGCATGGACAAGTAGACTGTAGTCCAGGAATATGGCAATTAGATTGTACCCATCTAGAAGGAAAAGTTATCCTGGTAGCAGTTCATGTAGCCAGTGGCTATATAGAAGCAGAAGTTATTCCAGCAGAAACAGGACAGGAAACAGCATACTTTCTCTTAAAACTAGCAGGAAGATGGCCAGTAAAAGTGATACATACAGACAATGGCAGCAATTTCACCAGTGCTGTAGTTAAGGCCGCCTGTTGGTGGGCAGGCATCAAGCAGGAATTTGGAATTCCCTACAATCCCCAAAGTCAAGGAGTAGTAGAATCTATGAATAAAGACTTAAAGAAAATTATTGGACAGGTAAGAGAGCAGGCTGAGCATCTTAAGACAGCAGTACAAATGGCAGTATTCATCCACAATTTTAAAAGAAAAGGGGGGATTGGGGGGTACAGTGCAGGGGAAAGAATAATAGACATAATAGCAACAGACATACAAACTAGAGAATTACAAAAACAAATTACAAAAATACAAAATTTTCGGGTTTATTACAGGGACAGCAGAGACCCAATTTGGAAAGGACCAGCAAAACTGCTCTGGAAAGGTGAAGGGGCAGTAGTAATACAAGACAGTAGTGACATAAAAGTAGTACCAAGAAGAAAAGCAAAGATCATTAGGGATTATGGAAAACAGATGGCAGGTGATGATTGTGTGGCAAGTAGACAGGATGAGGATTAATACATGGAAAAGTTTAGTAAAATACCATATGTATATTTCAAAGAAAGCTAGAGGATGGGTTTATAGGCATCACTATGACAGCAATCATCCAAGAATAAGCTCAGAAGTACACATCCCACTAGGAGATGCAAAATTAGTAGTGACAACATATTGGGGTCTGAATACAGGAGAAAGAAAGTGGCATCTGGGTCAGGGGGTCTCCATTGAATGGAGACTGAAAAGGTACAGAACACAAATAGACCCTGGCCTGGCAGATCAACTAATTCATATGCATTACTTTGATTGTTTTTCAGACTCTGCCATAAGGAAAGCCATATTAGGACATAGAGTTAGCCCTAGGTGTGATTATCAAGCAGGACATAACAAGGTAGGATCTCTACAGTATTTGGCATTAACAGCATTAATAACACCAAAAAGGATAAAGCCACCTTTGCCTAGTGTTAGGAAGTTAACAGAAGATAGATGGAACAAGCCCCAGGAGACCAAGGGCCGCAGAGGGAGCCCTACAATGAATGGGCATTGGAGCTTTTAGAAGAGCTTAAGAGTGAAGCTGTTAGACATTTTCCTAGGCCATGGCTTCATGACTTAGGACAACATATCTATGCAACTTATGGGGATACCTGGGTAGGAGTTGAAGCTCTACTAAGAGTTCTGCAACAACTATTGTTTGTCCATTTCAGAATTGGGTGTCAACATAGCAGAATAGGCATTATTCGGCAGAGAAGAGCAAGAAATGGATCCAGTAGATCCTAACCTAGAGCCCTGGAAACATCCAGGAAGTCAGCCTAGGACTGCTTGTAACAATTGCTATTGTAAAAAGTGTTGCCTTCATTGCCAAGTTTGCTTCTTAAAGAAAGGCTTAGGCATCTCCTATGGCAGGAAGAAGCGGAGACAGCGACGAAGACCTCCTCAAGGCGATCAGGCTCATCAAGTTCCTCTATCAAAGCAGTAAGTAACATATGTGATGCAACCTGTAGTGATAGCAATAGKAGCATTAGTAGTAACGCTAATAATAGCAATAATTGTGTGGACCATAGTTTTCATAGAGTGCTGTAGATTAAGAAAGCAAAGAAAGATAGACAGGTTAATTAATAGAATAAGAGAAAGAGCAGAAGATAGTGGCAATGAGAGTGAGGGGGATGAAGAGGAATTATCAACACTTATGGAAATGGGGCACCATGCTCCTTGGAATGTGGATGATTTGTAGTGCTGCAGGAAACTTGTGGGTCACAGTTTATTATGGGGTACCTGTGTGGAAAGAAGCAACCACCACTCTATTTTGTGCATCGGATGCTAACTCACTTAAAGCAGAGGCACATAATATCTGGGCCACACATGCTTGTGTACCCACGGATCCCAGCCCACAGGAGGTAGTACTGGCAAATGTCACAGAGAACTTAACATGTTGGAAAAATAACATGGTGGACCAGATGCATGAGGATATAATCAGTTTATGGGAGCAAAGCCTAAAACCATGTGTAAAATTAACCCCACTCTGTGTCACTTTAAACTGTACTGATATCCGGAATAAGACTATCAACAACAACAGCACTGGCGAAATGAAAAACTGCTCTTTCAATGTAACTACAGTGGTAAGGGATAAGAAGAAGCAAGAATATGCACTTTTTTATAGACTTGATATAGTACCAATGGATAATGATAATACCAGTTATAGATTAATAAACTGTAATACCTCAACCGTTACACAGGCTTGTCCAAAGATATCCTTTGAACCAATTCCTATACATTATTGTGCCCCAGCTGGTTTTGCAATTCTAAAGTGTAACAATAAAACATTCAATGGAACAGGCCCATGCACAAATGTCAGCACAGTACAATGTACACATGGAATTAAGCCAGTGGTATCAACTCAACTGCTGTTAAATGGCAGTCTAGCAGAAAAGGAAATAATAATTAGATCTGAAAATCTCACAAACAATGCTAAAAACATAATAGTACAGCTTAATGTATCTGTACCAATTAAATGTGAAAGGCCCAACAACAATACAAGACGAGGTATACATATAGCACCAGGACAAGCACTCTTTGCAACAACAAATGTAATAGGAGATATAAGAAGAGCACATTGTAATATCAGTAGCACAAAATGGAATGAAACTTTACAACAGTTAGCAAAAAAATTAGGAGACCTCTTTAACAAGACAGAAATAAATTTTAAGCCATCTTCAGGAGGGGACCTAGAGATTACAACACACAGTTTTGTTTGTGGAGGGGAATTTTTCTACTGCAATACATCAGGACTGTTTAATAGTACCTGGATGGTTAATAGTACAGTGAATCAGACAGGGTTAAATAATAGTACAATCACACTCCAATGCAGAATAAAACAAATTATAAACATGTGGCAAGAAGTAGGAAGAGCAATGTATGCCCCTCCCATTGAAGGAGTAATCAAATGTTCATCAAACATTACAGGGCTAATATTGACAAGAGATGGTGCAAATAATAATACGAATGAGACTTTCAGACCTGGAGGAGGAAATATGAAAGACAATTGGAGAAGTGAACTATATAAATATAAAGTAGTACAAGTTGAACCAATAGGACTAGCACCTACCAAGGCAAAGAGAAGAGTGGTGGAAAGGGAAAAAAGAGCAATAGGGCTAGGAGCTATGTTCCTTGGGTTCTTGGGAGCAGCAGGAAGCACAATGGGCGCAGCGTCAATAACGCTGACGGTACAGGCCAGACAATTATTGTCTGGTATAGTGCAACAGCAAAACAATTTGCTGAAGGCTATAGAAGCGCAACAGCATCTGTTGCAGCTCACAGTCTGGGGCATTAAACAGCTCCAGGCGAGAATCCTGGCTGTGGAAAGATACCTAAAGGACCAACAGCTCCTAGGGATTTGGGGCTGCTCTGGAAAGCTCATCTGCACCACTAATGTGCCCTGGAATTCTAGTTGGAGCAATAGATCTGTAGATACAATTTGGGATAACATGACCTGGATGCAGTGGGAAAGAGAAATTGACAATTACACAGGCATAATATATGACTTACTTGAAGAATCACAAAACCAGCAAGAAAAGAATGAAAAAGACTTGTTGGAATTGGACAAATGGGCAAGTTTGTGGAATTGGTTTAGCATAACAAGATGGTTGTGGTATATAAAAATATTTATAATAATAGTAGGAGGCTTGATAGGTTTAAGAATAATTTTTGCTGTGCTTTCTTTAGTGAATAGAGTTAGGCAGGGATACTCACCTCTGTCGTTTCAGACCCCCTTCCCAGCCCCGAGGGGACCCGACAGGCCCGAAGGAACAGAAGAAGGAGGTGGAGAGCAAGACAGAGGCAAATCAATTCGATTGGTGAGCGGATTATCAGCACTTATCTGGGACGATCTGCGGAACCTGTGCCTCTTCAGCTACCACCGATTGAGAGACTTACTATTAATTGCAACGAGGATTGTGGAACTTCTGGGACGCAGGGGGTGGGAAGCAGTCAAGTATCTGGGGAATCTTCTGCAATATTGGATACAGGAACTAAAGAATAGTGCTATTAGATTGTTTGATGCCACAGCAATAGCAGTAGCTGAGGGGACAGATAGGGTTATAGAAGTAGTACGAAGAGCTTTTAGAGCTGTTCTTCACATACCTAGAAGAATAAGACAGGGCTTCGAAAGGGCTTTGATATAACATGGGTGGCAAATGGTCAAAATGGCCTGCTATAAGGGAAAGAATGAGAAGAACTGAGCCAGCAGCAGATGGGGTAGGAGCAGCATCTCGGGACCTGGAAAGACATGGGGCAATCACAAGTAGAAATACAGCAGCTACTAATGCTGATTGTGCCTGGCTAGAAGCACAAGAAGAAGA
>D.UG.98.98UG57146_AF484513_G.NG.01.PL0567_DQ168573
GCGAGAGCGTCAGTATTAAGTGGGGGACAATTAGATGAATGGGAAAAAATTCGGTTACGGCCAGGGGGAAATAAAAAATATAGACTAAAACATATAGTATGGGCAAGCAGGGAGCTAGAACGATTTGCACTTAACCCTGGCCTCTTAGAAACATCAGAAGGCTGTAAACAAATACTGGCACAGCTACAACCAGCTATTCAGACAGGATCAAAGGAAATTAAATCATTATATAATACAGTAGCAACCCTCTATTGTGTACATAAAAGGATACAGGTAACGGACACCAAGGAAGCTTTAGACAAGATAGAGGAAGAACAAAAGAAAGCAAGGCAAGCAACAGCAAGGCAAGCAACAGCTGACACAAGAAACAGCAACCAGGTCAGCCAAAATTATCCTATAGTGCAAAACCTACAGGGGCAAATGGTACACCAGCCCCTGTCACCTAGAACTTTGAACGCATGGGTAAAAGTAATAGAGGAGAAGGCTTTCAACCCAGAAGTAATACCCATGTTTACAGCATTATCAGAAGGAGCCACCCCACAAGATTTAAACACCATGCTAAACACAGTGGGGGGACACCAAGCAGCTATGCAAATGTTAAAAGAGACCATCAATGAGGAAGCCGCAGAATGGGATAGGCTACATCCAGTGCAGGCAGGACCTATTGCACCAGGCCAAATAAGAGAACCAAGGGGAAGTGATATAGCAGGAACTACTAGTAACCTTCAGGAACAAATAACATGGATGACAAACAATCCACCTATCCCAGTAGGAGAAATCTATAAAAGATGGATAATCCTGGGATTAAATAAAATAGTAAGAATGTATAGCCCTGTCAGCATTTTGGACATAAGACAAGGACCAAAGGAACCCTTTAGAGACTATGTAGACCGGTTCTATAAAACTCTAAGAGCTGAGCAAGCTTCACAGGATGTAAAAAATTGGATGACCGAAACCTTGTTGGTCCAAAATGCGAACCCAGATTGTAAAACTATCTTAAAAGCATTGGGACCAGGGGCTTCATTAGAAGAAATGATGACAGCATGTCAGGGAGTGGGAGGACCCGGTCATAAAGCAAGAGTTTTGGCTGAGGCAATGAGCCAAGCAACAAAGATGAATGCTGCTGTTATGATGCAGAGAGGCAATTTTAAGGGCCCAAAGAAAATCATTAAGTGTTTCAACTGTGGCAAAGAAGGGCATATAGCAAAAAATTGCAGGGCTCCTAGAAAAAAGGGCTGTTGGAAGTGTGGAAGGGAAGGACACCAAATGAAAGATTGCACTGAAAGACAGGCTAATTTTTTAGGGAAAATTTGGTCTTCCCACAAGGGAAGGCCAGGGAATTTCCTTCAGAGCAGACCAGAGCCAACAGCCCCACCAGCAGAGAGCTTCGGGTTTGGGGAAGAGATAACCCCCTCTCAGAAACAGGAGCAGAAGGAGGAACTGTATCCTTTAACCTCCCTCAGATCACTCTTTGGCAACGACCCCTCGTCACAGTAAGGATAGGGGGACAGCTAAAGGAAGCTCTATTAGATACAGGAGCAGATGATACAGTATTAGAAGAAATGAATTTGCCAGGAAAATGGAAACCAAAAATGATAGGGGGAATTGGAGGCTTTATCAAAGTAAGACAGTATGATCAAATACTAGTAGACATTTGTGGACATAAAGCTATAGGTACAGTATTAATAGGACCTACACCCGTCAACATAATTGGAAGAAATTTGTTGACTCAGATTGGTTGCACATTAAATTTTCCAATTAGTCCTATTGAAACTGTACCAGTAAAATTGAAGCCAGGGATGGATGGCCCAAAAGTTAAACAATGGCCATTGACAGAAGAAAAAATAAAAGCACTAACAGAAATTTGTACAGAAATGGAAAAGGAAGGAAAAATTTCAAGAATTGGGCCTGAAAATCCATACAATACTCCAATATTTGCCATAAAGAAAAAAGACAGTACTAAGTGGAGAAAATTAGTAGATTTCAGAGAACTTAATAAGAGAACTCAAGACTTCTGGGAAGTTCAACTAGGAATACCACATCCTGCAGGACTAAAAAAGAAAAAATCAGTAACAGTACTGGATGTGGGTGATGCATATTTTTCAGTTCCTTTAGATAAAGACTTTAGAAAGTATACTGCATTCACCATACCTAGCACAAATAATGAGACACCAGGAATTAGATATCAGTACAATGTACTTCCACAAGGATGGAAAGGATCACCGGCAATATTCCAAAGTAGCATGACAAAAATCTTAGAACCTTTTAGAAAACAAAATCCAGAAATAGTTATCTATCAATACATGGATGATTTGTATGTAGGATCTGACTTAGAAATAGGGCAACATAGAGTAAAAGTAGAGGAGTTAAGGGAACACTTATTGAAGTGGGGGTTTACCACACCAGACAAAAAGCATCAGAAAGAACCTCCATTTCTTTGGATGGGTTATGAACTCCATCCTGACAAATGGACAGTACAGCCTATAAAACTGCCAGAAAAAGAAAGCTGGACTGTCAATGATATACAGAAGTTAGTGGGGAAATTAAATTGGGCAAGCCAGATTTATCCAGGAATTAAAGTAAGGCAATTATGCAAATGCCTTAGGGGAGCTAAAGCACTGACAGAAGTAATACCACTGACAGAAGAAGCAGAATTAGAACTGGCAGAAAATAGGGAAATTCTAAAAGAACCAGTACATGGAGTGTATTATGACCCATCAAAAGACTTAATAGCAGAAATACAGAAACAGGGGCAAGACCAATGGACATATCAAATTTATCAAGAACAATATAAAAATCTGAAAACAGGAAAGTATGCAAAATTGAGGGGTACCCACACTAATGATGTAAAACAATTAACAGAAGCAGTGCAAAAAATAGCCCAAGAATGTATAGTGATATGGGGAAAGACTCCTAAATTTAGACTACCCATACAAAAGGAAACATGGGAAGCATGGTGGACAGAGTATTGGCAGGCCACCTGGATTCCTGAGTGGGAGTTTGTCAATACCCCTCCTTTAGTTAAATTATGGTACCAGTTAGAAAAGGAACCCATAGTAGGAGCAGAAACCTTCTATGTAGATGGGGCAGCTAATAGAGAGACTAAATTGGGAAAGGCAGGATATGTTACTGACAGAGGAAGACAGAAAGTTATCTCTCTAACTGACACAACAAATCAGAAGACTGAATTACAAGCCATTAATCTAGCTTTGCAGGATTCGGGATTAGAAGTAAACATAGTAACAGACTCACAATATGCATTAGGAATCATTCAAGCACAACCCGATAAGAGTGAATCAGAGATAGTCAATCAAATAATAGAGCAGTTAATAAAAAAGGAAAAAGTCTACCTGTCCTGGGTACCAGCACACAAGGGAATTGGAGGAAATGAACAAGTAGATAAATTAGTCAGTAATGGAATCAGAAAAATACTATTTTTAGATGGAATAGATAAGGCTCAAGAAGAACATGAGAAATACCACAACAATTGGAGAGCAATGGCTAGTGATTTTAACCTGCCACCTGTGGTAGCAAAAGAAATAGTAAGAAGCTGTGATAAATGTCAGCTAAAAGGAGAAGCCTTGCATGGACAAGTAGACTGTAGTCCAGGAATATGGCAATTAGATTGTACACATTTAGAAGGAAAAGTTATCCTGGTAGCAGTCCACGTAGCCAGTGGCTATATAGAGGCAGAAGTCATTCCAGCAGAGACAGGGCAGGAAACAGCCTACTTTCTCTTAAAATTAGCAGGAAGATGGCCAGTAAAAGTAGTACACACAGACAATGGCAGCAATTTCACCAGCACTGTAGTTAAGGCCGCCTGTTGGTGGGCAGGCATCAAGCAGGAATTTGGAATTCCCTACAATCCCCAAAGTCAAGGAGTAGTAGAATCTATGAATAAAGAATTAAAGAAAATTATAGGACAGGTAAGAGATCAAGCTGAACATCTTAAGACAGCAGTACAAATGGCAGTATTCATTCACAATTTTAAAAGAAAAGGGGGGATTGGGGGGTACAGTGCAGGGGAAAGAATAATAGACATAATAGCAACAGACTTACAAACCAGAGAATTACAAAAACAAATCATAAAAATTCAAAATTTTCGGGTTTATTACAGGGACAGCAGAGATCCAATTTGGAAAGGACCAGCAAAGCTTCTCTGGAAAGGTGAAGGGGCAGTAGTAATACAGGACAAGAGTGAAATAAAGGTAGTACCAAGAAGAAAAGCAAAGATCATTAGGGACTATGGAAAACAGATGGCAGGTGATGATTGTGTGGCAAGTAGACAGGATGAGGATTAAAACATGGAAGAGTTTAGTAAAACATCATATGTATGTTTCAAAGCAAACTCAAGGATGGATGTATAGACATCACTATGACTGCCCAAATCCAAAAATAAGTTCAGAAGTACACATCCCACTAGGAGAAGCGAGGCTGGTAGTAAAAACATATTGGGGTCTGCATACAGGAGAAAGAGAATGGCATCTGGGTCAGGGAGTCTCCATAGAATGGAGGAAAAGGAGATATAGCACACAAGTAGACCCTGGCCTGGCAGATCAACTAATTCATATATATTATTTTGATTGTTTTGCAGAATCTGCTATAAGGAAAGCCATATTAGGACATATAGTTATTCCTAGGTGTAATTATCAAGCAGGACATAACAAGGTAGGATCTTTACAATACTTGGCAATAACAGCATTGGTAACACCGAAAAAGATAAAACCACCTTTGCCTAGTGTTAAGAAACTGACAGAAGACAGATGGAACAAGCCCCAGAGGACCAAGGGCCACAGAGGGAGCCATACAATGAATGGGCATTAGAGCTTTTAGAGGAGCTTAAGAATGAAGCTGTTAGACACTTTCCTAGGACATGGCTTCATGGCCTAGGACAATATATCTATGAAACTTATGGGGATACCTGGACAGGAGTTGAAGCTATAATAAGAATCCTTCAACAACTACTGTTTATCCATTTCAGAAGTGGGTGTCACCATAGCAGAATAGGCATTATTCGGCAGAGAAGGACAAGAAATGGATCCAGTAGATCCTAACCTAGAGCCATGGAACCATCCAGGAAGTCAGCCTAGGACTTCTTGTAACAATTGCTATTGTAAAAAGTGCTGCTATCATTGCCAAGTTTGCTTTCTGAACAAAGGCTTAGGCATCTCCTATGGCAGGAAGAAGCGGAAGCACCGACGAGGAACTCCTTCGGGCAGTAAGGATCGTCAAAATCCTGTACGACAGCAGTAAGTAGTTATAATTAGTTGATGTAATGCAACCATTAGTAATATTTGCAATAGTAGGACTAATAGTAGCAGGCATAGCAGCCATAATTGTGTGGACTATAGTATTTATAGAATATAAGAAAATAAGAAAACAGAAAAGAATAGACTGGTTAATTGATAGAATAAGAGAAAGAGCAGAAGATAGTGGCAATGAGAGTGAGGGAGACAGAGAGGAATTATCAACACTCGTGGAGATGGGGCATCATGCTCCTTGGGATATTGATGATATGTAGTGTTACAGGACAATTGTGGGTCACAGTTTATTATGGGGTACCTGTGTGGAAAGAAGCAACCACTACTCTATTTTGTGCATCAGATGCTAAAGCATATGAACCAGAGGCACATAATGTTTGGGCTACACATGCCTGTGTACCAACAGACCCCAACCCACGGGAAATAAAACTAGAAAATGTCACAGAAGAATTTAACATGTGGAAAAATAACATGGTGGAGCAGATGCATGAGGATGTAATTAGTTTATGGGATCAAAGCCTAAAACCATGTGTAAAATTAACCCCACTCTGTGTCACGTTAGACTGCATTGATTGGAATAATGTCACTGTTGTGAACGCGAGCAAGGAAATAGGAATGAAAAACTGCTCTTTCAATATAACCACAGAAGTAAGAGATAAGAAGAAGCAAGTACACGCGCTTTTTTACAAACTTGATGTGGTACAAATAGATGATGAGAATGGTAATAGGACCCAGAATAGTAATGGGACCAGCTATAGATTAATAAATTGTAATACCTCAACCATTACACAGGCATGTCCAAAGGTATCCTTTGAGCCAATTCCCATACATTATTGTGCCCCAGCTGGATTTGCGATTCTAAAATGTAATGATAAGAAGTTCAATGGGACGGGTCCATGTCACAACGTCAGCACAGTACAGTGTACACATGGGATTAGGCCAGTAGTGTCAACTCAACTGTTGTTGAACGGCAGTCTAGCAGAAGAAGAGATAATAATTAGATCTGAAAACCTCACAAATAATGCTAAAATCATCATAGTACAGCTTAATGAGTCTGTAACAATCAATTGCACAAGGCCCTACAATAATACAAGACAAGGTATACATATAGGACCAGGACGAGCACTCTATACAACAGACATAGTAGGAGATATAAGACAAGCACATTGTAATATTAGTAGAACAGAATGGAATAAAACTTTACAACAGGTAGCTAAGAAATTAAAAGACCTTCTTAACCAGACAATAATAAATTTTAAACCATCCTCGGGAGGGGACCTAGAAATTACAACACACAGCTTTAATTGTGGAGGGGAATTTTTCTACTGCAATACATCAGAACTGTTTAATAGTACATGGGGGAATTCTAGTACATCAACTAGTACAGGGGTAAATAAGAGTACAATCACTATCCCATGCAGAATAAAACAAATTATAAACATGTGGCAGGAAGTAGGAAAAGCAATGTATGCCCCTCCCATTCGAGGACTAATCAAATGTTCCTCAAATATTACAGGACTATTGTTGGTAAGAGATGGTGGTGCAACTAATAATAGTCAGAATGAGACCTTCAGACCTGGAGGAGGAGATATGAGAGACAATTGGAGAAGTGAATTATACAAATATAAAGTAGTAAGACTTGAACCACTAGGTCTAGCACCCACCAAGGCAAAGAGAAGAGTGGTGGAAAGAGAAAAAAGAGCAATAGGACTGGGAGCTATGTTCCTTGGGTTCTTGGGAACAGCAGGAAGCACGATGGGCGCAGCGTCACTGACGCTGACGGTACAGGCCAGACAGTTATTGTCTGGTATAGTGCAACAGCAAAACAATTTGCTGAGGGCTATAGAGGCGCAACAGCATCTGTTGCAACTCACAGTCTGGGGCATTAAACAGCTCCAGGCAAGAGTCCTGGCTGTGGAAAGCTACCTAAGGGATCAACAGCTCCTAGGAATTTGGGGTTGCTCTGGAAAACACATTTGCACCACTACTGTACCCTGGAACTCTAGCTGGAGTAATAAATCTCTAGAGGAGATTTGGGGTAACATGACCTGGATGGAGTGGGAAAAAGAAATTGACAATTACACAAGTTTAATATACAGCTTAATTGAAGAATCGCAAACCCAGCAAGAAAAGAATGAACAAGAACTATTGGCATTAGACAAATGGGCAAGTTTGTGGAATTGGTTTAGCATAACAAATTGGCTGTGGTATATAAGAATATTCATAATGATAGTAGGAGGCTTAATAGGTTTAAGAATAGTTTTTGCTGTGCTTTCTGTAGTAAATAGAGTTAGGCAGGGATATTCACCTCTGTCGTTTCAGACCCTCCTCCCAGCCCCGAGGGGACCCGACAGGCCCGAAGGAATAGAAGAAGAAGGTGGAGAGCAAGGCAGAGACAGATCCATTCGATTGGTGAACGGATTATCAGCACTTATCTGGGACGATCTGAGGAACCTGTGCCTCTTCAGCTACCACCGCTTGAGAGACTTACTCTTAATTGCAGCGAGGATCCTGGAACTTCTGGGACGCAGGGGGTGGGAAGCAATCAAATATCTGTGGAATCTTCTACAATATTGGATTCAGGAACTAAAGAATAGTGCTATTAGCTTGCTTAATACCACAGCAATAGTAGTAGCTGAGGGGACAGATAGGGTTATAGAAATAGTACAAAGAGCTGTAGCACAAATAAGAAGGGCTTTACTATAAAATGGGTGGCAAGTGGTCAAAAAGTAGTATAGTTGGATGGCCTGCTATAAGGGAAAGAATAAGGAGAGCTGAACCAGCAGCAGAAGGGGTGGGAGCAGCATCTAAAGACCTAGAAAAACATGGGGCAATCACAAGTAGCAACACAGCACAGACTAATCCTGACTGTGCCTGGCTAGAAGCACAAGAAGAAGAAGAGGAAGTGGGTTTTCCAGTCAAACCTCAGGTACCGTTAAGACCAATGACTTACAAAGGAGCGATAGATATAAGCCACTTTATAAAAGAAAAGGGGGGACTGGATGGGTTAATTTGGTCCAAGAAAAGGCAAGATATCCTTGATCTTTGGGTCTACAACACACAAGGCTACTTCCCTGATTGGCAGAATTACACACCAGGGCCAGGGATAAGATATCCACTGACCTTTGGATGGTGCTTCGAGCTAGTACCAGTCGAGCCAAAGGAGGTAGAAGAAGACACTGAAGGAGAGAACAACTGCTTGTTACACCCTATGTGCCAACATGGAATGGAGGACCCGGAGAGAGAAGTGTTAAAGTGGAGATTTAACAGTAGACTGGCATTTGAACACAAGGCCAAATTGTTACATCCGGAGTACTACAAAGACTGCTGACACCGAGTTTTCTACAAGGGACTTTCCGCTGGGGACTTTCCAGGGGAGGCGTAACCTGGGCGGGACTGGGAGTGGCTAACCCTCAGATGCTGCATATAAGCAGCTGCTTTTTGCCTGTACTGGGTCTCTCTGGTTAGACCAGATTTGAGCCTGAGAGCTCTCTGGCTAGCTAGGGAACCCACTGCT
>D.CM.01.01CM_4412HAL_AY371157_H.BE.93.VI991_AF190127
GCGAGAGCGTCAATATTAAGCGGGGGAAAATTGGATGCATGGGAAAAAATTCGGTTACGGCCAGGGGGAAGCAAAAAGTATAGGCTAAAACATCTAATATGGGCAAGCAATGAGCTAGAACGATTTGCACTTAATCCTGGCCTTTTAGAGACATCAGATGGCTGTAAACAAATACTAGGCCAGCTACAACCAGCTCTTAAAACAGGAACAGAAGAACTTAGATCATTATTTAATGCAGTAGCAGTACTCTATTGTGTACATGAAAGGATAGAGGTAAAGGACACCAAGGAAGCCTTAGACAAGATAGAGGAAGAACAAAACAAAAGTAAGAAAAAAGCACAGCAAGCAGCAGCTGACACAGGGGACAACAAACAGGTCAGCCAAAATTATCCTATAGTGCAGAACTTACAGGGGCAAATGGTACACCAAGCCCTATCACCCAGAACCTTGAACGCATGGGTAAAAGTAATAGAGGAAAAGGCTTTCAACCCAGAAGTAATACCCATGTTTTCAGCATTATCAGAAGGAGCCACCCCACAGGATTTAAATACCATGCTAAACACAGTGGGGGGACATCAAGCAGCCATGCAAATGTTAAAAGAGACCATCAATGAGGAAGCTGCAGAATGGGACAGGCTACATCCAGTGCAAGCAGGGCCTGTTGCACCAGGCCAGATGAGAGAACCAAGGGGAAGTGATATTGCAGGAACTACTAGTACCCTTCAGGAACAAATAGGGTGGATGACAAGTAATCCACCAATCCCAGTAGGGGAAATCTATAAAAGATGGATAATCTTGGGATTGAATAAAATAGTAAGAATGTATAGCCCTGTCAGTATTTTGGATATAAGACAAGGACCAAAAGAACCCTTTAGAGACTATGTAGACCGGTTCTATAAAACTCTAAGAGCCGAGCAAGCTACACAGGAAGTAAAAAATTGGATGACAGAAACCTTGTTGGTTCAAAATGCAAACCCAGACTGTAAAACTATCTTAAAGGCGTTGGGGCCAGGGGCTACACTAGAAGAAATGATGACAGCATGTCAGGGAGTGGGAGGGCCCGGCCATAAAGCAAGAGTTTTGGCTGAGGCAATGAGCCAAGCAACAGCAGGTATGAATGCTGCAATAATGATGCAGAGGGGCAATTTTAAGGGCCCAAAGAGAATTGTTAAGTGTTTCAACTGTGGCAAAGAAGGGCACATAGCAAAAAATTGCAGGGCCCCTAGGAAAAAGGGCTGTTGGAAATGTGGAAGAGAAGGACACCAAATGAAAGATTGCACAGAAAGACAGGCTAATTTTTTAGGGAAAATTTGGCCTTCCAACAAGGGAAGGCCAGGGAACTTTCTTCAGAGCAGACCAGAGCCAACAGCCCCACCAGCAGAGAGCTTCGGGTTCGGGGAGGAGATAGCCCCCTCTCCGAGGCAGGAGCTGAAAGAACAGGAACCTCCTTTAACTTCCCTCAGATCACTCTTTGGCAACGACCAATAGTCACAGTAAAAATAGAGGGACAGTTGAAGGAGGCTCTATTAGACACAGGAGCAGATGATACAGTATTAGAAGACATAAATTTGCCAGGAAAATGGAAACCAAAAATGATAGGAGGAATTGGAGGTTTTATCAAAGTAAGACAATATGAGCAAGTAGCCATAGAAATTTTTGGACAGAAGGCTATAGGTACAGTATTAGTAGGACCTACACCTGTCAACATAATTGGAAGAAATTTGTTGACCCAGATTGGCTGCACTCTAAATTTTCCAATTAGTCCTATTGAAACTGTACCAGTAAAATTAAAGCCAGGAATGGATGGCCCAAAAATTAAACAATGGCCATTAACAGAAGAAAAAATAAAAGCATTAACAGATATTTGTAAAGAAATGGAAAAGGAAGGAAAAATTTCAAGAATTGGGCCTGAAAATCCATACAATACTCCAATATTTGCTATAAAGAAAAAAGACAGTACTAAGTGGAGAAAATTAGTAGATTTCAGAGAACTTAATAAGAGAACTCAAGACTTCTGGGAAGTTCAATTAGGAATACCGCATCCTGCCGGGCTGAAAAAGAAAAAATCAGTAACAGTACTAGATGTAGGTGATGCATACTTTTCAGTTCCCTTAGATAAAGAGTTTAGGAAATACACAGCATTCACCATACCTAGTACAAACAATGAAACACCAGGAATTAGATATCAGTACAATGTGCTTCCACAGGGATGGAAAGGATCACCAGCGATATTCCAATGTAGTATGACAAAGATCTTAGAGCCTTTTAAAAAACAAAATCCAGAACTAATTATCTATTCATACATGGATGATTTGTATGTAGGATCTGATTTGGAAATAGGGCAGCATAGAGCAAAAATAGAAAAATTAAGAGAACATCTATTAAAATGGGGACTCACCACGCCAGATAAAAAACATCAGAAAGAACCTCCATTTCTTTGGATGGGTTATGAACTCCATCCTGATAAATGGACAGTACAGCCTATAACACTGCCAGAAAAAGAAAGCTGGACTGTCAATGATATACAGAAGCTAGTGGGAAAATTAAATTGGGCAAGCCAGATTTATCCAGGAATTAAAGTAAGGCAATTATGTAAACTCCTTAGGGGAGCTAAAGCATTAACAGAGATAATACCACTAACAAAAGAGGCAGAATTAGAACTGGCAGAAAACAAGGAAATTCTCAAAGAACCAGTACATGGAGCGTATTATGACCCATCAAAAGACTTAATAGCAGAAGTACAGAAACAAGGGGATGGCCAATGGACTTGGCAAATTTATCAAGAACCATTTAAAAATCTGAAAACAGGAAAGTATGCAAGAATGAGGAGTGCCCACACTAATGATGTAAAACAATTAACAGAGGCAGTGCAAAAAATAGCCACAGAAAGCATAGTAATATGGGGAAAGACTCCTAAATTTAGACTACCCATACAAAAGGAAACATGGGACGCATGGTGGATGGAGTATTGGCAGGCCACTTGGATTCCTGAGTGGGAGTTTGTCAATACCCCTCCTTTAGTAAAATTATGGTATCAGTTAGAAAAGGAACCCATAATAGGAGCAGAAACTTTCTATGTAGATGGGGCATCTAATAGAGACACTAAATTAGGAAAAGCAGGATATGTTACTGACAAGGGAAGACAGAAAGTTGTCTCGTTTACTAATACTACAAATCAGAAGACTGAATTACAAGCAATTAATCTAGCTTTGCAGGATTCGGGAGCAAAAGTGAACATAGTAACAGATTCACAATATGCATTAGGAATCATTCAAGCACAACCAGATAAGAGTGAATCAGAAATAGTCAATCAAATAATAGAACAGTTAATAAAAAAGGAAAAGGTCTACCTGGCATGGGTACCAGCACACAAAGGAATTGGAGGAAATGAACAAGTAGACAAATTAGTTAGTAGTGGAATCAGGAAAGTACTATTTTTGGATGGAATAAGTGAGGCTCAAGATGATCATGACAAATATCACAGCAATTGGAGAGCAATGGCTAGTGATTTTAACCTACCACCTATAATAGCAAAAGAAATAGTAGCTAGCTGTGATAAATGTCAGCTAAAAGGAGAAGCCATGCATGGACAAGTAGACTGTAGTCCAGGAATATGGCAATTAGATTGTACACATCTAGAGGGAAAAGTTATCCTGGTAGCAGTTCATGTAGCCAGTGGCTATATAGAAGCAGAAGTTATTCCATCAGAAACAGGGCAGGAGACAGCATACTTTCTCTTAAAATTAGCAGGAAGATGGCCAGTAAAAGTAGTGCATACAGACAATGGCAGCAATTTTACCAGTGCTGCCGTTAAGGCCGCCTGTTGGTGGGCAGGTATCAAGCAGGAATTCGGAATTCCCTACAATCCCCAAAGTCAGGGAGTAGTAGAATCTATGAATAATCAATTAAAGAAAATTATAGGGCAGGTAAGAGATCAAGCTGAACATCTTAAGACAGCAGTACAAATGGCAGTATTCATTCACAATTTTAAAAGAAAAGGGGGGATTGGGGGGTACAGTGCAGGGGAAAGAATAATAGACATAATAGCAACAGACATACAAACTAAAGAATTACAAAAACAAATTTCAAAAATTCAACATTTTCGGGTTTATTACAGGGACAGCAGAGATCCAATTTGGAAAGGACCAGCAAAACTTCTGTGGAAAGGTGAAGGGGCAGTAGTAATACAAGACAATAGTGACATAAAGGTAGTACCAAGAAGAAAAGCAAAAATCATTAGGGATTATGGAAAACAGATGGCAGGTGATGATTGTGTGGCAAGTAGACAGGATGAGGATTAACACATGGAAAAGTTTAGTGAAATACCATATGTATATTTCAAAGAAAGCCCAAGGATGGTTTTATAGACATCACTATGATAGCCATCACCCAAAAATAAGTTCAGAAGTACACATCCCATTAGGGGATGCTAGACTGGTAGTAACAACATATTGGGGTCTGCATACAGGAGAAAGAGAATGGCATCTGGGTCAGGGAGTCTCCATAGAGTGGAGAAAAAGGAGATATAGCACACAAATAGACCCTGGTCTGGCAGACCAACTAATTCATATGTATTACTTTGATTGTTTTACAGACTCTGCCATAAGAAAAGCCATATTAGGACATAGAGTTAGTCCTAGGTGTGAATATCCAGCAGGACATAACAAGGTAGGATCCTTGCAGTATTTGGCACTTACAGCATTAATAGCGCCAAAAAGGAAAAAACCACCTTTGCCTAGTGTTAGGAAGTTAACAGAAGATAGATGGAACAAGCCCCATCAGACCAAGGGCCACAGAGGGAGCCATACAATGAGTGGACATTAGAGCTTTTAGAGGAGCTCAAGAGTGAAGCTGTTAGACATTTTCCTAGGATATGGCTTCATGGCTTAGGACAACATATTTATGATACCTATGGGGATACCTGGACAGGAGTTGAAGCTATAATAAGAATCCTGCAACAACTGCTGTTCATTCATTTCAGAATTGGGTGTCAACATAGCAGAATAGGCATTACTCGACAGAGAAGAGCAAGAAATGGATCCAGTAGATCCTAACCTAGAGCCCTGGAACCATCCAGGAAGTCAGCCGAGTACTGCCTGTAACAATTGTTATTGTAAGAGATGTTGCTATCATTGCCTGCTTTGCTTCACTAAGAAAGGCTTAGGCGTCTCCTATGGCAGGAAGAAGAGAGGACAGCGACGAAGACCTCCTCAAGACAATCAGACTCATCAAGTTTCTGTACCAGAGCAGTAAGTAATACATGTAATGCAATCTTTAGAGATATTAGCAATAGTAGCATTGGTAGCAGCGCTAATAATAGCAATAGTTGTGTGGACCATAGTATATATAGAATATAGAAAAATAAAAAAGCAAAGGCAAATAGACCGGCTAATTGATAGAATAAGAGAAAGAGCAGAGGACAGTGGCAATGAGAGTGATGGGGATAGAGAGGAATTATCAACACTCATGGAAATGGGGCACCATGCTCCTTGGGATGTTGCTGATGACATATAGTGCAGCAGGTAATTTGTGGGTCACAGTATATTATGGGGTGCCTGTATGGAAAGAAGCAAAAACCACTCTATTTTGTGCATCAGATGCTAAATCATATAAAACAGAGGCACATAATATCTGGGCTACACATGCCTGTGTACCCACGGACCCCGATCCACAAGAATTAGTACTGGACAATGTCACAGAAAATTTTAACATGTGGAAAAATAACATGGTGGAGCAGATGCATGAGGATATAATCAGTTTATGGGATCAAAGCCTAAAACCATGTGTAAAATTAACCCCACTATGTGTCACTCTAAACTGCAGTAATCCCAACATTACTAATAACAGTAGTGCTAACAACATCAGCATTGTAAAAAAAATGAAGAACTGCTCTTTCAATACAACCACAATATTGAAGGACAAACAGAAGCAAGAATATGCACTTTTTTATATACTTGATATAGTAGGAATAGATAATAGTAGTAATAGGTTAATAAATTGTACCACCTCAGTCATCACACAGGCTTGTCCCAAGATAACCTCTGAGCCTATTCCCATACATTATTGTGCCCCAGCTGGATTTGCAATTCTAAAATGTAATGATAAGCTGTTCAATGGAACAGGCCCATGTAGAAATGTCAGCGCAGTACAATGTACACATGGAATCAAGCCAGTGGTATCAACTCAATTGCTGTTGAATGGCAGTCTAGCAGAAGAGGTCATGGTTAGATCTGAAAATCTCACAGACAATGCTAAAAACATAATAGTCCAGCTTAATAATACTATAAACATTACTTGTGTAAGGCCGAACAGCAATACAAGAAAAAGTATAAATCTAGGACCAGGGCAGGCATTCTATGCAACATATGCAACAAATATAATAGGAAACATAAGACAGGCACATTGTAATCTTAGTGCAACACAATGGAATAAAACTCTACACCAGGTAGCACAAAAATTAGGAAAGCTTCTTAACAAGACAAAAATAAATTTTAATTCATCCTCAGGAGGGGACCCAGAAATTACAACACACAGTTTTGTTTGTGGAGGAGAATTTTTCTACTGCAATACATCAGGATTGTTTAATGGAACATGGGATAATGGAACATGGACATGGAATACTAGTGCAGTACCAAATGAAACAATCACAATCCCATGTAGAATAAAACAAATTATAAACATGTGGCAGGGAGTAGGAAGAGCAATGTATGCCCCTCCCATTGAAGGACTAATTAAATGTTCATCAAATATTACAGGGTTACTGTTGACAAGAGATGGTGGCAATACTAGTGATAGTGCAGAGACTTTTAGGCCTGGAGGGGGAGATATGAGGGACAATTGGAGAAGTGAATTATATAAATATAAAGTAGTAAAAATTGAACCACTAGGAGTAGCACCCACCAGGGCAAAGAGAAGAGTGGTGGAAAGAGAAAAAAGAGCAATAGGATTAGGAGCTATGTTCCTTGGGTTCTTGGGAGCAGCAGGAAGCACGATGGGCGCAGCGTCAGTGACGCTGACGGTACAGGCCAGACAATTATTGTCTGGTATAGTGCAACAGCAAAATAATTTGCTGAGGGCTATAGAGGCGCAACAGCATCTGTTGCAACTCACGGTCTGGGGCATTAAACAGCTCCAGGCAAGAGTCCTGGCTGTGGAAAGATACCTAAAGGATCAACAGCTCCTAGGAATTTGGGGTTGCTCTGGAAAACACATTTGCACCACTAATGTACCCTGGAACTCTAGTTGGAGTAATAGATCTCTAGATGATATTTGGCAGAACATGACCTGGATGCAATGGGAGAGAGAAATTGAGAATTATACAGGTGTAATATACAGCTTAATTGAAGAATCGCAAATCCAGCAAGAAAAAAATGAAAAAGAATTATTAGAATTGGACAAGTGGGCAAGTTTGTGGAATTGGTTTAGCATATCTAACTGGCTGTGGTATATAAGAATATTCATCATGATAGTAGGAGGCTTAATAGGTTTAAGAATAGTTTTTGCTGTGCTTTCTATGGTAAGGAGAGTTAGGCAGGGATACTCACCTCTGTCGTTCCAGACCCTCCTCCCAGCCCCGAGGGGACCCGACAGGCCCGAAGGAATAGAAGAAGAAGGTGGAGAGCAAGACAGAGGCAGATCCATTCGATTGGTGAACGGATTCTCAGCACTTATCTGGGACGATCTGCGGAACCTGTGCCTCTTCAGCTACCACCGCTTGAGAGACTTAATCTTAATTGCAGCGAGGATTGTGGACCTTCTGGGACGCAGGGGGTGGGAAGCACTCAAATATCTGTGGAATCTCCTGCGATATTGGAGTCAGGAACTGAAGAATAGCGCTATTAACTTGCTTAACACCACAGCAATAGCAGTAGCTGAGGGGACAGATAGGGTTATAGAAATAATACAAAGAGCTGGTAGAGCTGTTCTCCATATACCCAGAAGAATAAGACAAGGTTTCGAAAGGGCTTTGCTATAAAATGGGTGGCAAATGGTCAAAAAGTAGCATAGTTGGCTGGCCTGCTATAAGGGAAAGAATAAGAAGAACTGATCCAGCAGCAGATGGGGTAGGAGCAGCATCCCGAGATCTGGAAAGACATGGGGCAATCACAAGTAGCAACACAGCAGCTAATAATGCTGCCTGTGCCTGGCTAGAAGCGCAAGAAGAAGAGGAGGTGGGTTTTCCAGTCACACCTCAGGTACCTGAAAGACCAGTGACTTACAAGGCAGCTGTATATCTTAGCCAATTTTTAAAAGAAAAGGGGGGACTGGAAGGGCTAGTTCACTCCCAAAAAAGACAAGATATCCTTGATCTTTGGGTCTACCACACACAAGGCTTCTTCCCTGATTGGCACAGCTACACACCAGGGCCAG
>D.TZ.01.A280_AY253311_J.SE.94.SE7022_AF082395
GCGAGAGCGTCAGTATTAAGCGGGGGACAATTAGATGCATGGGAAAAAATTCGGTTAAGGCCAGGGGGAAAGAAAAAATATCAACTAAAACATATAGTATGGGCAAGCAGGGAGTTAGAACGATTTGCACTTAATCCTGGCCTTTTAGAGACATCCGAAGGCTGTAAACAAATCTACAACCAGCTATTCAGACAGGATCAGAAGAACTTAAATCATTATTTAATACAGTAGCAACCCTCTATTGTGTGCATAGAAAGATAGAGGTAAAAGACACCAAGGAAGCTTTAGAAAAATTAGAGGAAGAGCAAACCAAAAGTAAGAAAAAGGCACAGCAAGCAACAGCTGACACAGGAAGCAGCAGCCAGGTCAGCCAAAATTATCCTATAGTGCAAAACCTACAGGGGCAAATGGTACACCAGGCCATATCACCTAGAACCTTGAACGCATGGGTAAAAGTAATAGAAGAGAAGGCTTTCAGCCCAGAAGTGATACCCATGTTTTCAGCATTATCAGAAGGAGCCACCCCACAAGATTTAAACACAATGCTAAACACAGTGGGGGGACATCAAGCAGCTATGCAAATGTTAAAAGAGACCATCAATGAGGAAGCTGCAGAATGGGATAGGCTACATCCAGTGCATGCAGGGCCTATTGCACCAGGACAGATGAGAGAACCAAGGGGAAGTGATATAGCAGGAACTACTAGTACCCTTCAGGAACAAATAGCATGGATGACAAATAATCCACCTGTCCCAGTAGGAGAAATATATAAAAGATGGATAATCCTGGGATTAAATAAAATAGTAAGAATGTATAGCCCTGTTAGCATTTTGGACATAAGACAAGGACCAAAGGAGCCCTTTAGGGACTATGTAGATCGGTTCTATAAAACTCTAAGAGCCGAGCAAGCTTCACAAGATGTAAAAAATTGGATGACTGAAACCTTGTTGGTCCAAAATGCGAACCCAGATTGTAAAACTATCTTAAAAGCATTGGGACCAGCGGCTACATTAGAAGAAATGATGACAGCATGTCAGGGAGTGGGGGGACCCAGTCATAAGGCAAGAGTTCTAGCTGAGGCAATGAGCCAAGCAACAAATGTAAATGCTGCCATAATGATGCAGAGAGGTAATTTTAAGGGCCCAAGGAAAATCATTAAGTGTTTCAACTGTGGCAAAGAAGGACACATAGCAAAAAATTGCAGGGCCCCAAGAAAAAAGGGCTGTTGGAAATGTGGAAAGGAAGGACACCAAATGAAAGATTGCACTGAAAGACAGGCTAATTTTTTAGGGAAAATTTGGCCTTCCCACAAAGGAAGGCCAGGGAACTTCCTTCAGAGCAGACCAGAGCCAACAGCCCCACCAGCAGAGATCTTCGGGTTTGGGGAGGAGATAAAACCCTCTCAGAAACAGGAGCAGAAAGACAAGGACAAGGAACTGTATCCTTCAGCTTCCCTCAAATCACTCTTTGGCAACGACCCCTTGTCACAATAAAAATAGGGGGACAGCTAAAGGAAGCTCTATTAGATACAGGAGCAGATGATACAGTATTAGAAGAAATGAGCTTGCCAGGAAAATGGAAACCAAAAATGATAGGGGGAATTGGAGGTTTTATCAAAGTAAGACAGTATGATCAAATACTCATAGAAATCTGTGGACAAAAAGCTATAGGTACAGTGTTAGTAGGACCTACACCTGTCAACATAATTGGAAGAAACTTGTTGACTCAGATTGGCTGTACTTTAAACTTTCCCATTAGTCCTATTGCCACTGTACCAGTAAAATTGAAGCCAGGGATGGATGGCCCAAAAGTTAAACAATGGCCGTTGACAGAAGAAAAAATAAAAGCACTAACAGAAATTTGTACAGAAATGGAAAAGGAAGGAAAAATTTCAAGAATTGGGCCTGAAAATCCATACAATACTCCAATATTTGCTATAAAGAAAAAAGACAGTACTAAGTGGAGAAAATTAGTAGATTTCAGAGAACTTAATAAGAGAACTCAAGATTTCTGGGAAGTTCAACTAGGAATACCGCATCCTGCAGGGCTAAAAAAGAAAAAATCAGTAACAGTATTGGATGTGGGTGATGCATACTTTTCAGTTCCCTTAGATAAAGATTTTAGAAAGTATACTGCATTCACCATACCTAGCACAAACAATGAGACACCAGGGATTAGATATCAGTACAATGTGCTTCCACAGGGATGGAAAGGATCACCAGCAATATTTCAAAGTAGCATGACAAAAATCTTAGAACCCTTTAGAAAACAAAATCCAGAAATAGTTATCTATCAATACATGGATGATTTGTATGTAGGATCTGACTTAGAGATAGGACAGCATAGAACAAAAATAGAGGAATTAAGGGACCACTTATTGAAGTGGGGATTTACCACACCAGACAAAAAACATCAGAAAGAACCTCCATTTCTTTGGATGGGTTATGAACTCCATCCTGATAAGTGGACAGTGCAGCCTATAAAACTGCCAGAAAAGGAAAGCTGGACTGTCAATGATATACAGAAGTTAGTGGGAAAATTAAATTGGGCAAGTCAGATTTATTCAGGAATTAAAGTAAAACAATTATGTAAACTCCTTAGGGGAGCCAAAGCACTGACAGAAGTAATACCACTGACAAAAGAGGCAGAATTAGAACTGGCAGAAAATAGGGAGATTCTAAGAGAAACAGTACATGGAGCATATTATGACCCATCAAAAGACTTAATAGCAGAAATACAGAAACAAGAGCAAGGCCAATGGACATATCAAATTTATCAAGAACCATTTAAAAATCTGAAAACAGGAAAGTATGCAAAAATGAGGGGTACCCACACTAATGATGTAAAACAATTAACAGAGGCAGTGCAAAAAATAGCCCTAGAAGGTATAGTGATATGGGGAAAGATTCCTAAATTTAGACTGCCCATACAAAAGGAAACATGGGAAACATGGTGGACAGAGTATTGGCAAGCCACCTGGATTCCTGAGTGGGAGTTTGTCAATACCCCTCCTTTAGTTAAATTATGGTACCAGTTAGAGAAGGAACCCATAATAGGAGCAGAAACTTTCTATGTAGATGGGGCGGCTAATAGAGAGACTAGATTAGGAAAAGCAGGATATGTTACTGACAAAGGAAGACAGAAAGTTGTCTCTCTAACTGACACAACAAATCAGAAGACTGAGTTACAAGCCATAAACCTAGCTTTGCAGGATTCGGGACTAGAAGTAAACATAATAACAGACTCACAATATGCATTAGGGATCATTCAAGCACAACCAGATAAAAGTGAATCAGAGTTAGTCAGTCAAATAATAGAACAGTTAATAAAGAAGGAAAAGGTTTACCTAGCATGGGTACCGGCACACAAGGGGATTGGAGGAAATGAACAAGTAGATAAATTAGTCAGTAGTGGAATCAGAAAAGTATTATTCTTGGATGGAATAGATAAGGCACAGGAAGATCATGAAAGATATCACAGCAACTGGAGAGCAATGGCTAGTGATTTTAACCTGCCATCTGTGGTAGCAAAAGAAATAGTAGCCTGCTGTGATAAATGTCAGCTAAAAGGAGAAGCCATGCATGGACAAGTAGACTGTAGTCCAGGAATATGGCAATTGGATTGCACACATTTAGAAGGAAAAGTTATCCTGGTAGCAGTTCATGTAGCCAGTGGCTATATAGAAGCAGAAGTTATTCCAGCAGAAACAGGGCAGGAAACAGCCTACTTTATCTTAAAATTAGCAGGAAGATGGCCAGTAAAAGTAATACATACAGACAATGGCTCCAATTTCACCAGTGCTACTGTTAAAGCTGCCTGTTGGTGGGCAGGCATCAAGCAGGAATTTGGAATTCCCTACAATCCCCAAAGTCAAGGAGTAGTAGAATCTATGAATAGAGAGTTAAAGAAAATTATAGGACAGGTAAGAGATCAAGCTGAACACCTTAAGACAGCAGTACAAATGGCAGTATTTATCCACAATTTTAAAAGAAAAGGGGGGATTGGGGGGTACAGTGCAGGAGAAAGAATAATAGACATAATAGCATCAGACTTACAAACTACAGAATTACAAAAACAAATCACAAAAATTCAAAACTTTCGGGTTTATTACAGGGACAGCAGAGACCCAATTTGGAAAGGACCAGCAAAGCTTCTCTGGAAAGGTGAAGGGGCAGTAGTAATACAAGACCATAGTGACATAAAGGTAGTACCAAGAAGAAAAGCAAAGATCATTAGAGATTATGGAAAACAGGTGGCAGGTGATGATTGTGTGGCAAGTAGACAGGATGAGGATTAGAACATGGAAAAGTTTAGTAAAACACCATATGTATGTTTCAAGGAAAGCGCAAGGATGGTTGTATAGACATCACTATGACAGCCATCACCCAAAAATAAGTTCAGAAGTACACATTCCACTAGGAGATGCTAGACTGGTGGTAACAACATATTGGGGTCTGCATACAGGAGAAAGAGAATGGCATCTGGGTCAGGGAGTCTCCATAGAATGGAGAAAAAGGAGATATAGCACACAAGTAGACCCTGGACTGGCAGACCAACTAATTCATATGTATTATTTTGATTGTTTTACAGACTCTGCCATAAGGAAAGCAATATTAGGTCATATAGTGAGTCCTAGGTGTGATTATCAAGCAGGACATAACAAGGTAGGATCTTTACAGTATTTGGCACTAATAGCATTAATAAAACCAAAAAAGATAAAGCCACCTTTGCCTAGTGTTAAGAAGCTAACAGAGGATAGATGGAACAAGCCCCAGAGGACCAAGGGCCACAGAGGGAGCCCTACAATGAATGGACATTAGAGCTTTTAGAGGAGCTTAAGAGTGAAGCTGTTCGACACTTTCCTAGGTTGTGGCTCCATAACTTAGGACAATTTATCTATGAAACTTATGGAGATACATGGGCAGGAGTTGAAGCTATAATAAGAATCCTACAACAACTACTGTTTATTCATTTCAGAATTGGGTGTCAACATAGCAGAATAGGCATTACTCTACAGAGAAGAACAAGAAATGGATCCAGTAGACCCTAACCTAGAGCCCTGGAATCATCCAGGAAGTCAGCCTAGGACTCCTTGTAACAATTGTTATTGTAAAAAGTGTTGCTATCATTGTCAAAATTGCTTCATAACGAAAGGCTTAGGCATCTCCTATGGCAGGAAGAAGCGGAGACAGCGACGAAGAACTCCTCAGGGCGATCAGGCTCATCAAGATCCTATACCAAAGCAGTAAGTAGTACATGTAATGACACCTTTAGAGATAACAGCAATAGCAGCATTAGTAATAGCTTCAATACTAGCAATAGTGGTGTGGACTATAGTATACATAGAGTATAGGAGAATAAAAAAGCAAAAGAAAATAGACTGGTTAATTGATAGAATAAGAGAAAGAGCAGAAGATAGTGGCAATGAGAGTGATGGAGACACAGAGGAATTATCAACACTTGTGGAGATGGGGCATCATGCTCCTTGGAATGTGGATGACATATAGTGTTGCAGAACAGTTGTGGGTCACAATTTATTATGGGGTACCTGTTTGGAGAGAAGCAAACACCACTCTATTTTGTGCATCAGATGCTAAATCATTTGACACAGAGGCACATAATATCTGGGCTACACATGCCTGCGTACCAACAGACCCCAACCCACAAGAAATGGATCTGGTAAATGTTTCAGAAAACTTTAACATGTGGAAAAATAACATGGTGGAACAGATGCATGAGGATATAATCAGCTTATGGGAGGAAAGCCTAAAACCATGTGTAAAATTAACCCCACTCTGTGTCACTTTACACTGCTCTGACGCGAACACGACTAACAGTGGGAATGGGACTAACACGACTGATCCTCGCCTTATTGAAAAAGGAGAGATGAAAAACTGCTCTTTCAATATAACCACAGAAATAAGAGATAAGAGAAAGCAAGTACAAGCACTTTTTTATAAACTTGATGTGGTACCAATAGATAAAAAGAATAATAATAGTTATACATTAATGCATTGCAATACCTCAGCCATTAAACAAGCTTGTCCAAAGGTATCCTTTGAGCCAATTCCCATACATTATTGTGCCCCAGCTGGTTTTGCAATTCTAAAGTGTAAAGATAAGAAGTTCAATGGAACAGGCCCATGCAAAAAAGTCAGTACAGTACAATGTACACATGGAATTAGGCCAGTGGTGTCAACTCAACTGCTGTTGAATGGCAGTTTAGCAGGAGAAGAGATAATAATTAGATCTGAAAATCTCACAAACAATGTTAAAACCATAATAGTACAGTTAAATGAGACTGTAAAAATTAATTGTACAAGGCCTAATAACAATACAAGAAAAGGTATACGTATAGGACCAGGGCAAACATTCTTTACAGCAGAGGTAACAGGAGATATAAGAAAAGCATATTGTAACATTAGTGGAGCAGAATGGGATAAAACTTTACAACAAGTAGCTACAAAACTAGGAGACCTTCTTAACAAGACAATAATAAATTTTAGTCCATCCTCAGGAGGGGACCCAGAAATTACAACACATAGCTTTAATTGTGGAGGGGAATTTTTCTACTGCAATACATCACTCCTGTTTAATACTACATGGATTAAGGGTACACAAAATAATACAGAGACAAATAATAGTACAATCACAATCCCATGCAGAATAAAACAAATTATAAACATGTGGCAGGGAGTAGGAAAAGCAATGTATGCCCCTCCCATCGCAGGACTAATCAGATGTACATCAAATATTACAGGACTATTACTAACAAGAGATGGTGGTAATGTAAATAATAGTAGAGAGGAGATCTTCAGACCTGGAGGAGGAGATATGAGAGACAATTGGAGAAGTGAATTATACAAATATAAAGTAGTAAGAATAGAACCAATAGGAGTAGCACCCACCAGGGCAAAGAGAAGAGTGGTGGAAAGAGAAAAAAGAGCAATAGGACTAGGAGCTATGTTCCTTGGGTTCTTGGGAGCAGCAGGAAGCACGATGGGCGCAGCGTCATTGACGCTGACGGTACAGGCCAGACAGTTATTGTCTGGTATAGTGCAACAGCAAAACAATTTGCTGAGGGCTATAGAGGCGCAACAGCATTTGTTGCAACTCACAGTCTGGGGCATTAAACAGCTCCAGGCAAGAGTCCTGGCTGTAGAAAGCTACCTAAAGGATCAACAGCTCCTAGGAATTTGGGGTTGCTCTGGAAAACACATTTGCACCACTGCTGTGCCCTGGAACTCTAGTTGGAGTAATAAGTCCTTAGATGACATTTGGAATAACATGACCTGGATGGAGTGGGAAAAAGAAATTGACAATTACACAGGAGTAATATACAGCTTAATTGAAGAATCGCAAGTCCAGCAAGAAAAGAATGAAAAAGAACTATTGGAATTGGACAAATGGGCAAGTTTGTGGAATTGGTTTAGCATAACAAAATGGCTGTGGTATATAAAATTATTCATAATGATAGTAGGAGGCTTGATAGGTTTAAAAATAGTTTTTACTGTGTTTTCTTTAGTAAATAGAGTTAGGCAGGGATATTCACCTCTGTCGTTGCAGACCCTCCTCCCAGCCTCGAGGGGACCAGACAGGCCCGAAGGAATAGAAGAAGAAGGTGGAGAGCAAGGCAGAGGCAGATCGATTCGATTGGTGAACGGATTCTCAGCACTTATCTGGGACGATCTGCGGAACCTGTGCCTCTTCAGCTACCGCCACTTGAGAGACTTAATCTTAATTGCCACACGGATTGTGGGACTTCTGGGACACAGGGGGTGGGAAGCCATCAAGTATCTGTGGAACCTCCTGCAATATTGGATTCAGGAACTGAAGAATAGTGCTATTAGTTTGCTCAATGTCACAGCAATAGCAGTAGCTGAGGGGACAGATAGGATTATAGAAATAATACAAAGAGCTTTTAGAGCTGTTCTTCACATACCTAGAAGAATAAGACAGGGTTTAGAAAGAGCTTTGCTATAAAATGGGGAACAAGTGGTCAAAAAGTTGGCCTCAGGTAAGGGACAGAATGAGGCGAGCTGCTCCTGCTCCAGCAGCAGATGGAGTGGGAGCAGTGTCTCAAGATTTGGCTAAGCATGGGGCAATCACAAGCAGCAATACAGCAGCTACAAATGATGACTGTGCCTGGCTGGAAGCACAAACAGAGGAGGAGGTTGGATTTCCAGTCAGACCTCAGGCGCCATTAAGACCAATGACTTATAAGGCAGCTTTGGATTTGAGCCACTTTTTAAAAGATAAGGGGGGACTGGAAGGGTTAGTTTGGTCTCAGAGAAGGCAAGACATCCTTGATCTTTGGGTCTACCACACACAAGGCTTCTTCCCTGATTGGCACAATTACACACCAGGGCCAGGGACTAGATATCCACTGACCTTTGGATGGTGCTTCGAGCTAGTACCAGTTGACCCAAAGGAGGTAGAAGAGACCACTGAAGGAGAGAACAGCTGCTTGTTACACCCTATAAGCCAGCATGGAATGGAGGACACGGAGAAAGAAGTGTTAGTATGGAGATTTAACAGCAGACTAGCATTTGAACACAAGGCCCGAAGCTTGCATCCGGAGTACTACAAAGACTGCTGACATCGAGACTGCTGACACCGAGTTTTGCTACAAGGGACTTTCCGCTGGGACTTTCCGGGGAGGCGTAACCTGGGCGGGGCTGGGGAGTGGCCAACCCTCAGATGCTGCATATAAGCAGCTGCTTTCTGCCTGTACTGGGTCTCTCTAGCTAGACCAGATTTGAGCCT
>D.CM.01.01CM_4412HAL_AY371157_K.CM.96.MP535_AJ249239
GCGAGAGCGTCAATATTAAGCGGGGGAAAATTGGATGCATGGGAAAAAATTCGGTTACGGCCAGGGGGAAGCAAAAAGTATAGGCTAAAACATCTAATATGGGCAAGCAATGAGCTAGAACGATTTGCACTTAATCCTGGCCTTTTAGAGACATCAGATGGCTGTAAACAAATACTAGGCCAGCTACAACCAGCTCTTAAAACAGGAACAGAAGAACTTAGATCATTATTTAATGCAGTAGCAGTACTCTATTGTGTACATGAAAGGATAGAGGTAAAGGACACCAAGGAAGCCTTAGACAAGATAGAGGAAGAACAAAACAAAAGTAAGAAAAAAGCACAGCAAGCAGCAGCTGACACAGGGGACAACAAACAGGTCAGCCAAAATTATCCTATAGTGCAGAACTTACAGGGGCAAATGGTACACCAAGCCCTATCACCCAGAACCTTGAACGCATGGGTAAAAGTAATAGAGGAAAAGGCTTTCAACCCAGAAGTAATACCCATGTTTTCAGCATTATCAGAAGGAGCCACCCCACAGGATTTAAATACCATGCTAAACACAGTGGGGGGACATCAAGCAGCCATGCAAATGTTAAAAGAGACCATCAATGAGGAAGCTGCAGAATGGGACAGGCTACATCCAGTGCAAGCAGGGCCTGTTGCACCAGGCCAGATGAGAGAACCAAGGGGAAGTGATATTGCAGGAACTACTAGTACCCTTCAGGAACAAATAGGGTGGATGACAAGTAATCCACCAATCCCAGTAGGGGAAATCTATAAAAGATGGATAATCTTGGGATTGAATAAAATAGTAAGAATGTATAGCCCTGTCAGTATTTTGGATATAAGACAAGGACCAAAAGAACCCTTTAGAGACTATGTAGACCGGTTCTATAAAACTCTAAGAGCCGAGCAAGCTACACAGGAAGTAAAAAATTGGATGACAGAAACCTTGTTGGTTCAAAATGCAAACCCAGACTGTAAAACTATCTTAAAGGCGTTGGGGCCAGGGGCTACACTAGAAGAAATGATGACAGCATGTCAGGGAGTGGGAGGGCCCGGCCATAAAGCAAGAGTTTTGGCTGAGGCAATGAGCCAAGCAACAGCAGGTATGAATGCTGCAATAATGATGCAGAGGGGCAATTTTAAGGGCCCAAAGAGAATTGTTAAGTGTTTCAACTGTGGCAAAGAAGGGCACATAGCAAAAAATTGCAGGGCCCCTAGGAAAAAGGGCTGTTGGAAATGTGGAAGAGAAGGACACCAAATGAAAGATTGCACAGAAAGACAGGCTAATTTTTTAGGGAAAATTTGGCCTTCCAACAAGGGAAGGCCAGGGAACTTTCTTCAGAGCAGACCAGAGCCAACAGCCCCACCAGCAGAGAGCTTCGGGTTCGGGGAGGAGATAGCCCCCTCTCAGAAACAGGAGCAGAAAGACAAAGACCAGGAACTGTATCCTTTAACTTCCCTCAAATCACTCTTTGGCAACGACCCCTTGTCACAATAAAAATAGGGGGACAGCTAAAAGAAGCTCTGTTAGATACAGGAGCAGATGATACAGTATTAGAAGACATAAATTTGCCAGGAAAATGGAAACCAAAAATGATAGGGGGAATTGGAGGTTTTATCAAAGTAAGACAGTATGATCAGATACCTATAGAAATTTGTGGACAGAAGGCTATAGGTACAGTATTAGTAGGACCTACACCTGTCAACATAATTGGAAGAAATTTGTTGACCCAGATTGGCTGCACTCTAAATTTTCCAATTAGTCCTATTGAAACTGTACCAGTAAAATTAAAGCCAGGAATGGATGGCCCAAAAATTAAACAATGGCCATTAACAGAAGAAAAAATAAAAGCATTAACAGATATTTGTAAAGAAATGGAAAAGGAAGGAAAAATTTCAAGAATTGGGCCTGAAAATCCATACAATACTCCAATATTTGCTATAAAGAAAAAAGACAGTACTAAGTGGAGAAAATTAGTAGATTTCAGAGAACTTAATAAGAGAACTCAAGACTTCTGGGAAGTTCAATTAGGAATACCGCATCCTGCCGGGCTGAAAAAGAAAAAATCAGTAACAGTACTAGATGTAGGTGATGCATACTTTTCAGTTCCCTTAGATAAAGAGTTTAGGAAATACACAGCATTCACCATACCTAGTACAAACAATGAAACACCAGGAATTAGATATCAGTACAATGTGCTTCCACAGGGATGGAAAGGATCACCAGCGATATTCCAATGTAGTATGACAAAGATCTTAGAGCCTTTTAAAAAACAAAATCCAGAACTAATTATCTATTCATACATGGATGATTTGTATGTAGGATCTGATTTGGAAATAGGGCAGCATAGAGCAAAAATAGAAAAATTAAGAGAACATCTATTAAAATGGGGACTCACCACGCCAGATAAAAAACATCAGAAAGAACCTCCATTTCTTTGGATGGGTTATGAACTCCATCCTGATAAATGGACAGTACAGCCTATAACACTGCCAGAAAAAGAAAGCTGGACTGTCAATGATATACAGAAGCTAGTGGGAAAATTAAATTGGGCAAGCCAGATTTATCCAGGAATTAAAGTAAGGCAATTATGTAAACTCCTTAGGGGAGCTAAAGCATTAACAGAGATAATACCACTAACAAAAGAGGCAGAATTAGAACTGGCAGAAAACAAGGAAATTCTCAAAGAACCAGTACATGGAGCGTATTATGACCCATCAAAAGACTTAATAGCAGAAGTACAGAAACAAGGGGATGGCCAATGGACTTGGCAAATTTATCAAGAACCATTTAAAAATCTGAAAACAGGAAAGTATGCAAGAATGAGGAGTGCCCACACTAATGATGTAAAACAATTAACAGAGGCAGTGCAAAAAATAGCCACAGAAAGCATAGTAATATGGGGAAAGACTCCTAAATTTAGACTACCCATACAAAAGGAAACATGGGACGCATGGTGGATGGAGTATTGGCAGGCCACTTGGATTCCTGAGTGGGAGTTTGTCAATACCCCTCCTTTAGTAAAATTATGGTATCAGTTAGAAAAGGAACCCATAATAGGAGCAGAAACTTTCTATGTAGATGGGGCATCTAATAGAGACACTAAATTAGGAAAAGCAGGATATGTTACTGACAAGGGAAGACAGAAAGTTGTCTCGTTTACTAATACTACAAATCAGAAGACTGAATTACAAGCAATTAATCTAGCTTTGCAGGATTCGGGAGCAAAAGTGAACATAGTAACAGATTCACAATATGCATTAGGAATCATTCAAGCACAACCAGATAAGAGTGAATCAGAAATAGTCAATCAAATAATAGAACAGTTAATAAAAAAGGAAAAGGTCTACCTGGCATGGGTACCAGCACACAAAGGAATTGGAGGAAATGAACAAGTAGACAAATTAGTTAGTAGTGGAATCAGGAAAGTACTATTTTTGGATGGAATAAGTGAGGCTCAAGATGATCATGACAAATATCACAGCAATTGGAGAGCAATGGCTAGTGATTTTAACCTACCACCTATAATAGCAAAAGAAATAGTAGCTAGCTGTGATAAATGTCAGCTAAAAGGAGAAGCCATGCATGGACAAGTAGACTGTAGTCCAGGAATATGGCAATTAGATTGTACACATCTAGAGGGAAAAGTTATCCTGGTAGCAGTTCATGTAGCCAGTGGCTATATAGAAGCAGAAGTTATTCCATCAGAAACAGGGCAGGAGACAGCATACTTTCTCTTAAAATTAGCAGGAAGATGGCCAGTAAAAGTAGTGCATACAGACAATGGCAGCAATTTTACCAGTGCTGCCGTTAAGGCCGCCTGTTGGTGGGCAGGTATCAAGCAGGAATTCGGAATTCCCTACAATCCCCAAAGTCAGGGAGTAGTAGAATCTATGAATAATCAATTAAAGAAAATTATAGGGCAGGTAAGAGATCAAGCTGAACATCTTAAGACAGCAGTACAAATGGCAGTATTCATTCACAATTTTAAAAGAAAAGGGGGGATTGGGGGGTACAGTGCAGGGGAAAGAATAATAGACATAATAGCAACAGACATACAAACTAAAGAATTACAAAAACAAATTTCAAAAATTCAACATTTTCGGGTTTATTACAGGGACAGCAGAGATCCAATTTGGAAAGGACCAGCAAAACTTCTGTGGAAAGGTGAAGGGGCAGTAGTAATACAAGACAATAGTGACATAAAGGTAGTACCAAGAAGAAAAGCAAAAATCATTAGGGATTATGGAAAACAGATGGCAGGTGATGATTGTGTGGCAAGTAGACAGGATGAGGATTAACACATGGAAAAGTTTAGTGAAATACCATATGTATATTTCAAAGAAAGCCCAAGGATGGTTTTATAGACATCACTATGATAGCCATCACCCAAAAATAAGTTCAGAAGTACACATCCCATTAGGGGATGCTAGACTGGTAGTAACAACATATTGGGGTCTGCATACAGGAGAAAGAGAATGGCATCTGGGTCAGGGAGTCTCCATAGAGTGGAGAAAAAGGAGATATAGCACACAAATAGACCCTGGTCTGGCAGACCAACTAATTCATATGTATTATTTTGATTGTTTTTCAGAATCTGCAGTAAGGAAGGCCATATTAGGACATAGAGTTAGTCCTAGGTGTGAATGTCAAGCAGGACATAACAAGGTAGGATCCTTACAATATTTGGCACTCACAGCATTAGTAGCTCCAAGAAGGCCAAAGCCACCTGTGCCTAGTGTTAAGAAACTAGTAGAGGATAGATGGAACAAGCCCCAGAAGACCAGGGGCCACAGAGGGAGCCAAACAATGAATGGACATTAGAGCTTTTAGAGGAGCTCAAGAGTGAAGCTGTTAGACATTTTCCTAGGATATGGCTTCATGGCTTAGGACAACATATTTATGATACCTATGGGGATACCTGGACAGGAGTTGAAGCTATAATAAGAATCCTGCAACAACTGCTGTTCATTCATTTCAGAATTGGGTGTCAACATAGCAGAATAGGCATTACTCGACAGAGAAGAGCAAGAAATGGATCCAGTAGATCCTAACCTAGAGCCCTGGAACCATCCAGGAAGTCAGCCGAGTACTGCCTGTAACAATTGTTATTGTAAGAGATGTTGCTATCATTGCCTGCTTTGCTTCACTAAGAAAGGCTTAGGCGTCTCCTATGGCAGGAAGAAGAGAGGACAGCGACGAAGACCTCCTCAAGACAATCAGACTCATCAAGTTTCTGTACCAGAGCAGTAAGTAATACATGTAATGCAATCTTTAGAGATATTAGCAATAGTAGCATTGGTAGCAGCGCTAATAATAGCAATAGTTGTGTGGACCATAGTATATATAGAATATAGAAAAATAAAAAAGCAAAGGCAAATAGACCGGCTAATTGATAGAATAAGAGAAAGAGCAGAGGACAGTGGCAATGAGAGTGATGGGGATAGAGAGGAATTATCAACACTCATGGAAATGGGGCACCATGCTCCTTGGGATGTTGCTGATGACATATAGTGCAGCAGGTAATTTGTGGGTCACAGTATATTATGGGGTGCCTGTATGGAAAGAAGCAAAAACCACTCTATTTTGTGCATCAGATGCTAAATCATATAAAACAGAGGCACATAATATCTGGGCTACACATGCCTGTGTACCCACGGACCCCGATCCACAAGAATTAGTACTGGACAATGTCACAGAAAATTTTAACATGTGGAAAAATAACATGGTGGAGCAGATGCATGAGGATATAATCAGTTTATGGGATCAAAGCCTAAAACCATGTGTAAAATTAACCCCACTATGTGTCACTCTAAACTGCAGTAATCCCAACATTACTAATAACAGTAGTGCTAACAACATCAGCATTGTAAAAAAAATGAAGAACTGCTCTTTCAATACAACCACAATATTGAAGGACAAACAGAAGCAAGAATATGCACTTTTTTATATACTTGATATAGTAGGAATAGATAATAGTAGTAATAGGTTAATAAATTGTACCACCTCAGTCATCACACAGGCTTGTCCCAAGATAACCTCTGAGCCTATTCCCATACATTATTGTGCCCCAGCTGGATTTGCAATTCTAAAATGTAATGATAAGCTGTTCAATGGAACAGGCCCATGTAGAAATGTCAGCGCAGTACAATGTACACATGGAATCAAGCCAGTGGTATCAACTCAATTGCTGTTGAATGGCAGTCTAGCAGAAGAGGTCATGGTTAGATCTGAAAATCTCACAGACAATGCTAAAAACATAATAGTCCAGCTTAATAATACTATAAACATTACTTGTGTAAGGCCGAACAGCAATACAAGAAAAAGTATAAATCTAGGACCAGGGCAGGCATTCTATGCAACATATGCAACAAATATAATAGGAAACATAAGACAGGCACATTGTAATCTTAGTGCAACACAATGGAATAAAACTCTACACCAGGTAGCACAAAAATTAGGAAAGCTTCTTAACAAGACAAAAATAAATTTTAATTCATCCTCAGGAGGGGACCCAGAAATTACAACACACAGTTTTGTTTGTGGAGGAGAATTTTTCTACTGCAATACATCAGGATTGTTTAATGGAACATGGGATAATGGAACATGGACATGGAATACTAGTGCAGTACCAAATGAAACAATCACAATCCCATGTAGAATAAAACAAATTATAAACATGTGGCAGGGAGTAGGAAGAGCAATGTATGCCCCTCCCATTGAAGGACTAATTAAATGTTCATCAAATATTACAGGGTTACTGTTGACAAGAGATGGTGGCAATACTAGTGATAGTGCAGAGACTTTTAGGCCTGGAGGGGGAGATATGAGGGACAATTGGAGAAGTGAATTATATAAATATAAAGTAGTAAAAATTGAACCACTAGGAGTAGCACCCACCAGGGCAAAGAGAAGAGTGGTGGAAAGAGAAAAAAGAGCAATAGGATTAGGAGCTATGTTCCTTGGGTTCTTGGGAGCAGCAGGAAGCACGATGGGCGCAGCGTCAGTGACGCTGACGGTACAGGCCAGACAATTATTGTCTGGTATAGTGCAACAGCAAAATAATTTGCTGAGGGCTATAGAGGCGCAACAGCATCTGTTGCAACTCACGGTCTGGGGCATTAAACAGCTCCAGGCAAGAGTCCTGGCTGTGGAAAGATACCTAAAGGATCAACAGCTCCTAGGAATTTGGGGTTGCTCTGGAAAACACATTTGCACCACTAATGTACCCTGGAACTCTAGTTGGAGTAATAGATCTCTAGATGATATTTGGCAGAACATGACCTGGATGCAATGGGAGAGAGAAATTGAGAATTATACAGGTGTAATATACAGCTTAATTGAAGAATCGCAAATCCAGCAAGAAAAAAATGAAAAAGAATTATTAGAATTGGACAAGTGGGCAAGTTTGTGGAATTGGTTTAGCATATCTAACTGGCTGTGGTATATAAGAATATTCATCATGATAGTAGGAGGCTTAATAGGTTTAAGAATAGTTTTTGCTGTGCTTTCTATGGTAAGGAGAGTTAGGCAGGGATACTCACCTCTGTCGTTCCAGACCCTCCTCCCAGCCCCGAGGGGACCCGACAGGCCCGAAGGAATAGAAGAAGAAGGTGGAGAGCAAGACAGAGGCAGATCCATTCGATTGGTGAACGGATTCTCAGCACTTATCTGGGACGATCTGCGGAACCTGTGCCTCTTCAGCTACCACCGCTTGAGAGACTTAATCTTAATTGCAGCGAGGATTGTGGACCTTCTGGGACGCAGGGGGTGGGAAGCACTCAAATATCTGTGGAATCTCCTGCGATATTGGAGTCAGGAACTGAAGAATAGCGCTATTAACTTGCTTAACACCACAGCAATAGCAGTAGCTGAGGGGACAGATAGGGTTATAGAAATAATACAAAGAGCTGGTAGAGCTGTTCTCCATATACCCAGAAGAATAAGACAAGGTTTCGAAAGGGCTTTGCTATAAAATGGGTGGCAAATGGTCAAAAAGTAGCATAGTTGGCTGGCCTGCTATAAGGGAAAGAATAAGAAGAACTGATCCAGCAGCAGATGGGGTAGGAGCAGCATCCCGAGATCTGGAAAGACATGGGGCAATCACAAGTAGCAACACAGCAGCTAATAATGCTGCCTGTGCCTGGCTAGAAGCGCAAGAAGAAGAGGAGGTGGGTTTTCCAGTCACACCTCAGGTACCTGAAAGACCAGTGACTTACAAGGCAGCTGTATATCTTAGCCAATTTTTAAAAGAAAAGGGGGGACTGGAAGGGCTAGTTCACTCCCAAAAAAGACAAGATATCCTTGATCTTTGGGTCTACCACACACAAGGCTTCTTCCCTGATTGGCACAGCTACACACCAGGGCCAG
>F1.FR.96.MP411_AJ249238_F2.CM.95.MP255_AJ249236
ATGGGTGCGAGAGCGTCAGTATTAAGCGGGGGAAAATTAGATGCATGGGAAAGAATTCGATTAAGACCGGGGGGAAAGAAAAAATATAGAATGAAGCATCTAGTATGGGCAAGCAGGGAGTTAGAACGATTTGCAGTTGATCCTGGACTTCTAGAAACACCAGAAGGCTGTAAGCAAATAATAAGACAGCTACAACCATCCCTTCAGACAGGATCAGAAGAGCTTAGATCATTGTTCAATACAGTAGCAGTTCTCTATTGTGTACATCAAAAGATAGAGATAAAGGACACCAAGGAAGCTTTAGAGAAGTTAGAGGAGGAACAAAACAAAGGTCAGCAAAAGACACAGCAAGCGGCAGCTGACAAAGGAGTCAGTCAAAATTACCCTATAGTACAAAATCTTCAGGGACAGATGGTACATCAGCCTATATCACCTAGAACTTTAAATGCATGGGTAAAAGTGATAGAAGAGAAGGCTTTTAGCCCAGAAGTAATACCCATGTTCTCAGCATTATCAGAAGGGGCCACCCCACAAGATTTAAACACCATGCTAAATACAGTGGGTGGACATCAAGCAGCCATGCAAATGTTAAAAGACACCATCAATGAGGAAGCTGCAGAATGGGACAGATTACATCCAGCGCATGCAGGGCCTATCCTACCAGGCCAGATGAGAGAACCTAGGGGTAGTGACATAGCTGGAACTACTAGTACCCTTCAGGAACAAATACAATGGATGACAAGCAACCCACCTGTCCCAGTGGGAGACATCTATAAAAGATGGATCATCCTAGGATTAAATAAAATAGTAAGAATGTATAGCCCTGTTAGCATTTTGGACATAAGACAAGGGCCAAAGGAACCTTTTAGAGACTATGTGGACAGGTTCTTTAAAACTCTAAGAGCTGAGCAAGCTTCACAGGAAGTAAAGAATTGGATGACAGAAAGCTTGCTGGTGCAAAATTCGAACCCAGACTGTAAGACCATCTTAAAAGCATTAGGACCAGGGGCTACACTAGAAGAAATGATGACAGCATGTCAGGGAGTGGGAGGACCTGGCCATAAGGCAAGGGTTTTGGCTGAGGCCATGAGCCAAGCAACAAATGCAGCTATAATGATGCAGAAAAGTAACTATAAGGGCCCAAGAAGATTTATTAAATGTTTTAATTGTGGCAAAGAAGGACACATAGCCAAAAATTGCAGGGCCCCTAGAAAAAAGGGCTGTTGGAAATGTGGAAAAGAAGGACATCAAATGAAAGACTGCACTGAAAGACAGGCTAATTTTTTAGGGAAAATTTGGCCTTCCAACAAGGGGAGGCCCGGAAATTTTCTTCAGAACAGGCCAGAGCCAACAGCCCCGCCAGCGGAGAGCTTCGGGTTCAAAGAGGAAATAACCCCCTCTCCGAAGCAGGAGCAGAAGGACGAGGGACAGGGACTGTATCCTCCCTTAGCCTCCCTCAAATCACTTTTTGGCAGCGACCCTTAGTCACCATAAGAGTGGGGGGACAGCTAAGGGAAGCTCTATTAGATACAGGAGCAGATGATACAGTATTAGAAGACATAGATTTGCCAGGAAAATGGAAACCAAAAATAATAGGGGGAATTGGAGGTTTTATCAAAGTAAAACAGTATGATCAAATAACCATAGATATTTGTGGACACAAGGCTATAGGTACAGTGTTAGTAGGACCTACACCTGTCAACATAATTGGAAGGAATATGTTGACTCAGATTGGTTGCACTTTAAATTTTCCAATTAGTCCTATTGAAACTGTACCAGTAAAATTGAAGCCAGGAATGGATGGCCCAAAGGTTAAACAATGGCCATTGACAGAGGAAAAAATAAAAGCACTAACAGAAATATGTACAGATATGGAAAAAGAAGGAAAGATTTCAAAAATTGGGCCTGAAAATCCATACAATACTCCAATATTTGCCATAAAGAAAAAAGACAGTACTAAATGGAGAAAATTAGTAGATTTTAGAGAACTTAATAAAAGAACTCAAGATTTTTGGGAAGTTCAATTAGGAATACCACATCCTGCAGGGTTAAAAAAGAAAAAGTCAGTAACAGTACTAGATGTGGGGGATGCATATTTTTCAGTTCCCTTAGATAAGGAGTTCAGGAAGTACACTGCATTCACCATACCTAGTCTCAACAATGAGACACCAGGAATCAGATACCAGTACAATGTGCTTCCACAAGGGTGGAAAGGATCACCAGCAATATTCCAAAGTAGTATGACAAAAATTTTAGAGCCCTTTAGAGCAAAAAATCCAGACATAGTTATCTACCAATACATGGATGATTTGTATGTAGGGTCTGACTTAGAACTAGGGCAGCATAGGATGAAAATAGAGGAGTTAAGGGAACATCTACTGAAATGGGGCTTTACTACACCAGACAAGAAACATCAGAAAGAACCCCCATTCCTTTGGATGGGGTATGAACTCCATCCTGATAAATGGACAGTACAGCCTATACAACTGCCAGAAAAGGACAGCTGGACTGTCAATGATATACAGAAGTTAGTAGGAAAATTAAATTGGGCAAGTCAGATTTATCCAGGGATTAAAATAAAGCAATTATGTAAACTCCTTAGGGGAGCCAAGGCACTAACAGACATAGTGCCACTGACTGAAGAAGCAGAGTTAGAATTGGCAGAGAACAGGGAGATTCTAAAAGAACCGGTACATGGGGTATATTATGACCCATCAAAAGACTTAATAGCAGAACTGCAGAAACAAGGGCAAGGCCAATGGACATATCAAATTTATCAAGAGCCATTTAAAAACCTAAAAACAGGAAAGTATGCAAAAACAAGGTCTGCCCACACTAATGATATAAAAGAATTAACAGAAGTAGTACAAAAAATAGCCACAGAAAGCATAGTGATATGGGGAAAGATTCCTAAATTTAGACTACCCATACAAAAGGAAACATGGGAAATATGGTGGACAGAGTATTGGCAGGCCACCTGGATTCCTGAATGGGAGTTTGTCAATACCCCTCCTCTAGTAAAATTATGGTACCAGTTAGAAACAGAACCCATAGCAGGAGCAGAAACTTTCTATGTAGATGGGGCAGCTAATAGAGAGACTAAAAAAGGAAAAGCAGGATATGTTACTGACAGAGGAAGACAAAAGGCTGTCATCCTAACTGAAACCACAAATCAGAAGGCTGAGTTACAAGCAATTCATTTAGCTTTACAGGATTCAGGATCAGAAGTGAATATAGTAACAGACTCACAGTATGTATTAGGAATTATTCAAGCACAACCAGATAAGAGTGAATCAGAGATAGTCAATAAAATAATAGAGAAATTAATACAAAAGGAAAGGGTCTACCTGTCATGGGTACCAGCACACAAAGGGATTGGAGGAAATGAACAAGTAGATAGATTAGTCAGTGCTGGAATCAGGAAAATACTGTTTTTAGATGGGATAGATAAGGCACAAGAAGAACATGAAAAATATCACAACAACTGGAGAGCAATGGCTAGTGATTTTAATCTGCCACCAGTAGTAGCAAAAGAAATAGTAGCTAGCTGTGATAAATGTCAGCTAAAAGGAGAGGCCATGCATGGACAAGTAGACTGTAGTCCAGGAATATGGCAATTAGATTGTACACATTTAGAAGGAAAAATTATCCTAGTAGCAGTCCATGTAGCTAGTGGATATATAGAAGCAGAAGTCATTCCAGCAGAAACAGGACAGGAAACAGCCTACTTCATACTAAAGTTAGCAGGAAGATGGCCAGTAAAAATAATACATACAGACAATGGTAGCAATTTCACCAGTAGTGCAGTTAAGGCAGCCTGTTGGTGGGCAGGTATACAGCAGGAATTTGGAATTCCCTACAATCCCCAAAGTCAAGGAGTAGTAGAATCCATGAATAAAGAATTAAAGAAAATCATAGGACAAGTAAGAGATCAAGCTGAACATCTTAAGACAGCAGTACAAATGGCGGTATTCATTCACAATTTTAAAAGAAAAGGGGGGATTGGGGGGTACAGTGCAGGGGAAAGAATAATAGACATAATATCAACAGACATACAAACTAGAGAATTACAAAAACAAATTATAAAAATTCAAAATTTCCGGGTTTATTACAGGGACAGCAGAGACCCAGTTTGGAAAGGACCAGCAAAGCTACTCTGGAAAGGTGAAGGGGCAGTAGTCATACAAGACAATAGTGAAATAAAAGTAGTACCAAGAAGAAAAGCAAAGATCATTAGAGATTATGGAAAACAGATGGCAGGTGATGATTGTGTGGCAGGTAGACAGGATGAGGATTAGCACATGGAAAAGTTTAGTAAAATACCATATGCATGTTTCAAAGAAAGCCAAAAATTGGTTTTATAGACATCATTTTCAAAGCAGGCATCCAAAAATAAGTTCAGAAGTACACATCCCACTAGAAGAAGCTAAATTAGTAGTAACAACATATTGGGGTCTGCATACAGGAGAAAGAGATTGGCATCTGGGTCAGGGAGTCTCCATAGAATGGAGGCAGGGACGGTATAGGACACAAATAGATCCTGACCTGGCAGACCAACTGATCCATATATATTATTTTGATTGTTTTTCAGCCTCTGCCATAAGGAAAGCCATCTTAGGACATAGAATTAGCCCTAGGTGTAACTATCAAGCAGGACATAACAAGGTAGGATCCCTACAATATTTGGCACTAACAGCATTAATAGCTCCAAAGAAGACAAAGCCGCCTTTGCCTAGTGTCAAGAAACTAGTAGAAGATAGATGGAACAAGCCCCAGGAGACCAGGGGCCACAGAGGGAGCCATACAATGAATGGACACTAGAGCTTTTAGAGGAGCTTAAGAATGAAGCTATTAGACATTTTCCTAGGCCATGGCTTCATGGATTAGGACAATATATCTATAACACCTATGGGGATACTTGGGAAGGAGTTGAAGCTATAATAAGGATACTGCAACAACTACTGTTTATCCATTTCAGAATTGGGTGCCAACATAGCAGAATAGGCATTATTCGACAGAGAAGAGTAAGAAATGGAACTAGTAGATCCTAACTTAGATCCCTGGAATCAACCAGGAAGCCAGCCTACAACTCCTTGTACCAAATGTTATTGTAAAAAGTGTTGCTTTCATTGCTACTGCTGCTTTGCAACGAAGGGCTTAGGCATCTCCTATGGCAGGAAGAAGCGGAGACAACGACGAAGAACTCCTCAGAGCAGTCAGAGCCATAAAAATCCTATACCAGAGCAGTAAGTATTATAGTATATGTAATGTCCAATCTGTATGTATTATCAATAGTAGCATTTATAATAGCATTAATAATAGCAATAGTTGTGTGGACTATAGTATTTATAGAATATAAGAAATTGTTAAGGCAAAGAAAAATAAATAGGTTATATGAAAGAATAAGAGAAAGAGCAGAAGACAGTGGCAATGAGAGTGAGGGTGATGCAGAGGAACTGGCAGCACTTGGGGAAATGGGGTCTTTTATTTCTGGGGATATTAATAATCTGTAGTGCTGCAGACAACTTGTGGGTTACAGTCTATTATGGGGTACCTGTGTGGAAAGAAGCAACTACTACGTTATTTTGTGCATCAGATGCTAAAGGATATGAAAGAGAAGTGCATAATGTCTGGGCCACACATGCCTGCGTACCCACAGACCCCAACCCACAGGAAATATGGCTGAAAAATGTAACAGAAAATTTTGATATGTGGAAAAATAACATGGTAGAACAAATGCATGAAGATATAATCAGTTTATGGGATCAAAGCCTAAAGCCATGTGTAAAGTTAACTCCACTCTGTGTTACTTTACACTGTAGTGATGTCAATATCACTAGTAATGCCACTACCACTAATGACACCAGCACCCCGGAAGAGTCAGGGGCAATACAAAACTGTTCTTTCAATATGACCACAGAAGTAAAAGACAAGAAGCTGAGAGTAAATGCACTCTTTTATAAACTTGATATAATACCAATCAATAACAGCAGTAGTAGTGACTATAGGCTAATAAATTGTAATACCTCAACCATTAAACAGGCTTGTCCAAAGGTATCTTGGGATCCAATTCCCATACATTATTGTGCTCCAGCTGGTTATGCGATTCTAAAGTGTAGGGATCCAAGGTTCAATGGGACAGGGCCATGCAAGAATGTCAGCACAGTACAATGTACACATGGAATTAGGCCAGTGGTATCAACTCAATTGCTGTTAAATGGCAGCCTGGCAGAAGAAGATATAATAATCAGATCTCAAAATATCTCAGATAATGCAAAAACCATAATAGTACACCTTAATGAAAGTGTACAGATTAATTGTACAAGACCCAACAACAATACAAGAAAAAGTATACATTTAGGACCAGGACAAGCATTCTATGCAACAGGTGATATAATAGGAGATATAAAAAAGGCATATTGTGAAATTAATGGAACACAATGGAGTAAAACTAAAACACAGGTACAAGAAAAGTTACGGGCTCTTTTTAATAAAACAATAAAATTTAACCAATCCTCAGGAGGGGACCTAGAAATTACAATGCATAGTTTTAATTGTAGAGGAGAGTTCTTCTACTGCGATACATCAGGATTGTTTAATGAAAGTGAAAAGTACAATGGCACTATCATTCTCCCATGTAAAATAAAACAAATTATAAACATGTGGCAGGGAGTAGGACAAGCAATGTATTCCGCTCCCATTGCAGGACGCATTAACTGTAACTCAACTATTACAGGCCTACTATTAACAAGAGATGGTGGTCAGAGTAATGATACTAATAGGACTGAGACTTTCAGACCTGAGGGAGGAAACATGAAAGACAATTGGAGAAATGAACTATATAAATATAAAGTAGTAGAAATTGAACCACTAGGAGTAGCACCCACCAAGGCAAGAAGACGAGTGGTGCAGAGAGAAAGAAGAGCAGTGGGAATAGGAGCTCTGTTCCTTAGATTCTTGGGAGCAGCAGGAAGCAACATAGGCGCAGCGTCAATAACGCTGACGGTACAGGCCAGACAATTACTGTCTGGAATAGTGCAGCAGCAAAACAATTTGCTGAGGGCTATTGAAGCGCAACAGCATCTGTTGCAGCTCACAGTCTGGGGCATTAAACAGCTCCAGGCAAGAGTCCTTGCTGTAGAAAGATACCTAAAGGATCAACAGCTCCTAGGGATTTGGGGCTGCTCTGGAAAACTCATCTGCACCACTAACGTGCCTTGGAACACTAGTTGGAGTAATAAATCTCATGATGAGATTTGGAACAACATGACCTGGATGCAGTGGGAAAAAGAGATTAACAATTACTCAAACACAATATACAGGTTAATTGAAGAATCGCAGAACCAACAGGAAAAGAATGAACAAGAATTATTGGCATTGGACAAATGGGCAAGTCTGTGGAGTTGGTTTGACATATCAAATTGGCTGTGGTATATAAAAATATTCATAATGATAGTAGGAGGAATGATAGGCTTAAGAATAGTTTTTGCTGTGCTTTCTATAGTAAATAGAGTTAGGAAGGGATACTCACCTTTGTCATTACAGACCCTTATCCCAAGCCCGAGGGGACCCGACAGGCCCGAAGGAATCGAAGAAGGAGGTGGAGAGCAAGACAGAAACAGATCCGTTCGATTAGTGAACGGATTCTTGTCGCTTGTCTGGGACGACCTGAGGAACCTGTGCCTCTTCAGCTACCGCCACTTGAGAGACTTCATATTAATTGCAGCAAGGACTGTGGACAGGGGACTAACGAGGGGGTGGGAAACCCTCAAATATCTATGGAACCTCGCACAGTATTGGAGTCAGGAACTAAAGAATAGTGCTATTAGCTTGCTTAATACCACAGCAATAGTAGTAGCTGAGGGAACAGATAGAGTTATAGAAGTTTTGCAAAGAGCTGGTAGAGCTGTTCTCAACGTACCTAGAAGGATAAGACAGGGCTTAGAAAGGAGTTTGCTATAAAATGGGTGGTAAGTGGTCAAAAAGTAGTATAGTTGGATGGCCTGCTGTAAGGGAAAGAATGAGAAGGACCCCTCCAGCAGCAGAAGGGGTGGGAGCAGTGTCTCAAGACTTAGATAGGCGAGGGGCAGTTACAAGCAGCAATACTGCAGCTACTAATCCTGACTTGGCCTGGCTGGAAGCACAAGAGGATGAGGAAGTAGGCTTTCCAGTCAGACCTCAGGTACCTTTAAGACCTATGACTTTTAAGGCAGCTGTAGATCTCAGCCACTTTTTAAAAGAAAAGGGGGGACTGGAAGGGTTAATTTACTCCAAGAAAAGACAAGAAATCCTTGATCTGTGGGTTTACCACACACAAGGCTTCTTCCCTGATTGGCAGAACTACACCCCAGGGCCAGGGATTAGATTCCCATTGACTTTTGGATGGTGCTTCAAGCTAGTACCAGTTGATCCAGATGAGGTAGAAAAGGCCAATGAAGGAGAAAACAACTGCTTGCTACACCCAATGAGCCAACATGGAATGGATGATGAAGACAGAGAAGTACTGAGATGGGAGTTTGACAGTCGTCTGGCATTTAGACACATAGCCAGAGAGAAACATCCTGAGTTCTATCAAAACTGATGACACAGGACACAGAGATTGCTGACACAGAAG
>F1.FI.93.FIN9363_AF075703_G.NG.01.01NGPL0674_DQ168575
AAAGCGAAAGTAGAACCAGAGAAGATCTCTCGACGCAGGACTCGGCTTGCTGAAGTGCACACGGCAAGAGGCGAGAGCGGCGACTGGTGAGTACGCCAATTTTTGACTAGCGGAGGCTAGAAGGAGAGAGATGGGTGCGAGAGCGTCAGTATTAAGCGGGGGAAAACTAGATGCATGGGAAAAAATTCGGTTAAGGCCGGGGGGAAAGAAACAATATAGAATAAAACATCTAGTATGGGCAAGCAGGGAGCTAGAACGATTTGCAATAGATCCTGGCCTTCTAGAAACATCAGAAGGCTGTCAAAAAATAATAGCACAGATACAGCCATCCATTCAGACAGGATCAGAAGAGCTTAGATCATTATATAACACAATAGCAGTCCTCTATTTTGTACATCAAAAGATAGAGGTAAAGGACACCAAGGAAGCTTTAGATAAGCTAGAGGAAGAACAAAACAAAAGTCAGCAAAAGACACAGCAAGCGGCAGCTGCAGCTGACAAAGGGGTCAGTCAAAATTACCCTATAGTACAGAATCTTCAGGGACAAATGGTACATCAGGCTATATCACCTAGAACTTTAAATGCATGGGTAAAGGTGATAGAAGAGAAGGCTTTTAGCCCAGAAGTTATACCCATGTTTTCAGCATTATCAGAAGGGGCCACTCCACAAGATTTAAACACCATGCTAAATACAGTGGGGGGACATCAAGCAGCCATGCAAATGTTAAAAGACACCATTAATGAGGAAGCTGCAGAATGGGACAGATTACATCCAGTGCATGCAGGACCTATTCCACCAGGCCAGATGAGGGAACCTAGGGGAAGCGATATAGCTGGAACTACTAGTACCCTTCAGGAACAAATACAATGGATGACAAGTAACCCACCTGTCCCAGTGGGAGACATCTATAAAAGATGGATCATCCTAGGATTAAATAAAATAGTAAGGATGTATAGCCCTGTCAGCATTTTGGACATAAGACAAGGGCCAAAAGAACCCTTTAGAGACTATGTAGACAGGTTCTTTAAAGCTCTAAGAGCTGAGCAAGCTACACAGGAAGTAAAGGGTTGGATGACAGACACCTTGTTGGTCCAAAATGCGAATCCAGATTGTAAGATCATTTTAAAAGGATTGGGAATAGGGGCTACACTAGAAGAAATGATGACAGCATGTCGGGGAGTGGGAGGACCTGGCCATAAGGCAAGAATTTTGGCTGAGGCAATGAGCCAAGCAAATACAACCATAATGATGCAGAAAAGTAATTTTAGGGGCCAAAGAAGAATTGTTAAATGTTTTAATTGTGGCAAAGAAGGACACATAGCCAGAAATTGCAGGGCCCCCAGGAAAAAGGGCTGTTGGAAATGTGGACAAGAAGGGCACCAAATGAAAGACTGCACTGAAAGACAGGCTAATTTTTTAGGGAAAATTTGGCCTTCCAACAAGGGGAGGCCCGGAAATTTCCTTCAGAGTAGACCAGAGCCAACAGCCCCGCCAGCAGAGAGCCTCGGGATCAGAGAAGAGGTAACTCCCTCTCCGAGGCAGGAGCAGAAAGAAGAGGGACAGTACCCTCCCTTAGCTTCCCTCAAATCACTCTTTGGCAACGACCCCTAGTCACAGTAAGAATAGGGGGACAGCTAATAGAAGCTCTATTAGACACAGGAGCAGATGATACAGTATTAGAACAAATAGATTTACCAGGAAAATGGAAACCAAAAATGATAGGGGGAATTGGAGGATTTATCAAAGTAAAACAGTATGATCAAATACCTATAGAAATTGAAGGGAAAAAGGCTATAGGGACAGTATTAGTAGGACCTACACCTATCAACATAATTGGAAGGAATATGTTGACTCAGATTGGTTGTACTTTAAATTTTCCAATTAGTCCTATTGAAACTGTACCAGTAAAACTGAAACCAGGAATGGATGGCCCAAAGGTTAAACAATGGCCATTGACAGAAGAAAAAATAAAAGCATTAACAGAGATATGTACAGATATGGAAAAAGAAGGAAAAATTTCAAGAATTGGGCCTGAAAATCCATACAATACTCCAGTATTTGCCATAAAGAAAAAAGACAGTACTAAATGGAGGAAGTTAGTAGATTTCAGAGAACTCAATAAAAGAACTCAAGATTTTTGGGAGGTTCAATTAGGAATACCACATCCTGCAGGGTTAAAAAAGAAAAAGTCAGTAACAGTACTGGATGTGGGGGATGCATATTTTTCAGTTCCCTTAGATAAAGATTTCAGGAAGTACACTGCATTCACCATACCTAGTGTCAACAATGAGACACCAGGAATTAGGTACCAGTACAATGTGCTTCCACAAGGATGGAAAGGATCACCAGCAATATTCCAATGTAGCATGACAAAAATCTTAGAGCCCTTTAGAACAAGAAATCCAGACATAGTTATCTACCAATACATGGATGATTTGTATGTAGGGTCTGACTTAGAAATAGGGCAGCATAGAACAAAAATAGAGGAGTTAAGAGAACATCTACTGAAATGGGGATTTACTACACCAGACAAAAAACATCAGAAAGAACCTCCATTCCTCTGGATGGGGTATGAACTCCATCCTGATAAATGGACAGTGCAGCCTATACAATTGCCAGACAAGGACAGCTGGACTGTCGATGATATACAGAAATTAGTAGGAAAACTAAACTGGGCAAGTCANATTTATCCAGGGATTAAAGTAAGGCAATTATGTAAACTCCTTAGAGGAGCCAAGGCACTAACAGACATGGTGCCACTGACTGCAGAAGCAAATTTAGAATTGGCAGAAAATAGGGAGATTCTAAAAGAACCAGTACATGGGGTATATTATGACCCATCAAAAGACTTAATACCAAAATTACAGAAACAAGGGCAAGGACAATGGACATATCAAATTTACCGAGAGCCATTTAAAAATCTAAAAACAGGAAAGTATGCAAAAATGAGGTCTGCCCACACTAATGATGTAAAACAATTAACAGAAGCAGTGCAAAAGATAGCTCTAGAAAGCATAGTAATATGGGGAAAGACTCCTAAGTTTAAACTACCTATTCTAAAAGAGACATGGGATACATGGTGGACAGAGTATTGGCAAGCCACCTGGATTCCTGAGTGGGAGTTTGTCAATACCCCCCCTCTAGTAAAACTATGGTATCAATTAGAAACAGAGCCCATAGCAGGAGCAGAAACATTCTATGTGGATGGGGCATCTAATAGAGAGACCAAAAAAGGAAAAGCAGGATATGTTACTGATAGAGGAAGACAAAAGGTTGTCTCCCTAACTGAGACCACAAATCAGAAGGCTGAGTTACAAGCAATTCATTTAGCTTTACAGGATTCAGGATCAGAAGTGAACATAGTAACAGATTCACAATATGCATTAGGAATCATTCAAGCACAACCAGATAAGAGTGAATCAGAGTTAGTCAATCAAATAATAGAGCAGTTAATACAAAAGGAAAAGATCTACCTGTCATGGGTACCAGCACACAAAGGGATTGGAGGAAATGAACAAGTAGATAAATTAGTCAGTGCTGGAATCAGAAAAATACTGTTTTTAGATGGGATAGATAAGGCACAAGAGGAACATGAAAAATATCACAACAATTGGAGAGCAATGGCTAGTGATTTTAATCTGCCACCTGTAGTAGCAAAAGAAATAGTAGCTAGCTGTGATAAGTGTCAGCTAAAAGGGGAAGCCATGCATGGACAAGTAGACTGTAGTCCAGGGATATGGCAATTAGATTGTACACATTTAGAAGGAAAAATTATCCTGGTAGCAGTCCATGTAGCTAGTGGATACATAGAAGCAGAAGTTATCCCAGCAGAAACAGGACAGGACACAGCCTACTTCATACTAAAGTTAGCAGGAAGATGGCCAGTAAAAATGATACATACAGACAATGGCAGCAATTTCACCAGTGCCGCGGTTAAGGCAGCCTGTTGGTGGGCAGGTATCCAGCAGGAATTTGGAATTCCCTATAACCCCCAAAGTCAAGGAGTAGTAGAATCAATGAATAAAGAGCTAAAGAAGATCATAGGACAGGTAAGAGATCAAGCTGAACATCTTAAGACAGCAGTACAAATGGCAGTATTCATCCACAATTTTAAAAGAAAAGGGGGGATTGGGGGGTACAGTGCAGGGGAAAGAATAATAGACATAATAGCAACAGACATACAAACTAAAGAATTACAAAAACAAGTTACAAAAATTCAAAATTTCCGGGTTTATTACAGGGACAGCAGAGACCCAGTTTGGAAAGGACCAGCAAAGCTACTCTGGAAAGGTGAAGGGGCAGTAGTCATACAAGACAATAGTGAAATAAAAGTAGTGCCAAGAAGAAAAGCAAAGATCATTAGGGATTATGGAAAACAGATGGCAGGTGACGATTGTGTGGCAGGTAGACAGGATGAGGATTAACACATGGAAAAGTTTAGTAAAATACCATATGCATGTTTCAAAGAAAGCCAAAAGATGGTTTTATAGACATCACTTTGAAAGCAGACATCCAAAAATAAGTTCAGAAGTACACATCCCCCTAGAGGAAGCTGAATTAGTAATAACAACATATTGGGGGCTGAATACAGGAGAAAGAGATTGGCATCTGGGTCAAGGAGTCTCCATAGAATGGAGGCAGGGGAGGTATAGGACACAAATAGACCCTGGCCTGGCAGACCAACTGATCCATATATATTACTTTGATTGTTTTTCAGAATCTGCCATAAGGAAAGCCATATTAGGACATAGAATTAGCCCTAGGTGTGACTATCAAGCAGGACATAACAAGGTAGGATCCCTACAATATTTGGCACTAACAGCATTAGTATCTCCAAAGAAGGCAAAGCCGCCTTTGCCTAGTGTCAAGAAACTAGTAGAAGACAGATGGAACAAGCCCCAGGAGATCAGGGGCCACAGAGGGAGCCATACAATGAATGGGCACTAGAACTTTTAGAGGAGCTTAAGAACGAAGCTGTTAGACATTTTCCTAGGCCATTCCTCCATGGCATAGGACAATATATCTATAACACCTATGGGGATACTTGGGAGGGAGTTGAAGCCATAATAAAAATATTGCAGCAACTACTGTTTATCCATTTCAGAATTGGGTGCCATCATAGCAGAATAGGCATTATTCGACAGAGAAGAGTAAGAAATGGAGCTAGTAGATCCTAATTTAGATCCCTGGAACCATCCAGGAAGCCAGCCTCCAACTCCTTGTAACAAATGCTATTGTAAACGGTGTTGCTTTCATTGCTACTGGTGCTTTGCAACGAAGGGCTTAGGCATCTCCTATGGCAGGAAGAAGCGGAGACAGCGACACAGAACTCCTCAAAGCAGTCAAATACATCAAGATCCTGTACCAAAGCAGTAAGTATTGTTAAGTAGTGTATGTAATGTCAGATTTGTTAGCAATAACGATAGTAGCATTTATAGTAGCCCTAATAATAGTAATAGTTGTGTGGACCATAGTATTTATAGAATATAAGAAGCTAGTAAGGCAAAGAAAAATAAATAGGTTGTATATAAGAATAAGAGAAAGAGCAGAAGACAGTGGCAATGAGAGTGAGGGGGATGCAGAGGAATTGGCAGCACTTGGGAAAATGGGGCCTTTTATTCCTGGGGATGTTAATAATCTGTAAAGCTGCGGATGACTTGTGGGTCACAATCTATTATGGGGTACCTGTGTGGAAAGAAGCAAACACCACTTTATTCTGTGCATCAGATGCTAAATCATATGAAAAAGAAGTACATAATGTCTGGGCTACACATGCCTGTGTACCCACAGACCCCAATCCACAAGAAGTAGCTCTAAATGTGACAGAAAATTTTAATATGTGGGAAAATGACATGGTAGAACAAATGCATAAAGATATAATCAGTTTATGGGATCAAAGTCTAAAGCCATGTGTAAAGCTAACCCCACTCTGTGTTACTTTAAATTGTACTAATGCCACTACCACCAATGACACTCTCTCTGACCAAAGCAGTACCCTGAAGGAAGAACCAGGGGCAATACAAAACTGTTCTTTCAATATGACCACAGAAGTAGAAGATAAGAAGCAGAAAGTACATGCGCTTTTTTATAGACTTGATATAGAACCAATCAGCAATAATAATAGCAGGGAAGAATATAGGCTAATAACTTGTAATACCTCAACCATTACACAGGCTTGTCCAAAGGTATCTTGGGATCCAATTCCCATACATTATTGTGCTCCAGCTGGTTATGCGATTCTAAAGTGTAAGGATAAAAGGTTCAATGGGACGGGGCCATGTAGGAATGTCAGCACAGTACAATGTACACATGGAATTAGGCCAGTGGTATCAACTCAATTGTTGTTAAATGGCAGCCTATCAGAAGGAGGTATAATAATCAGATCTCAAAATCTCTCAGATAATGCAAAAACTATAATAGTACACCTTAATGAATCTGTACAGATCAATTGTACAAGACCCAACAACAATACAAGAAAAAGTATACGTATAGGACCAGGACAATCATTTTATGCAACAGGAGAAATAATAGGAGACATAAGAAAGGCACATTGTAACATTAGTGGAGAACAATGGAATAAAACTTTAGACCGAGTAAAGGCAGAGTTAAAGCTTCATTTTAATAAAACAATACAATTTAACTCATCCTCAGGAGGGGACCTAGAAATTACAATGCATAGTTTTAATTGTAGAGGAGAATTTTTCTACTGCAATACATCACTACTGTTTAATAATACAGTACCTAATAATGGCACTATCACTCTCCCATGTCGAATAAAACAATTTGTAAACATGTGGCAGGAAGTAGGACGAGCAATGTATGCCGCTCCCATTGCAGGAAACATTACCTGTAACTCAAATATTACAGGTCTGCTATTGACAAGAGATGGTGGTCAGAGTAATAATAGTGATTCTGAGACCTTCAGACCTGGGGGAGGAGATATGAAAGACAATTGGAGAAGTGAACTATATAAATATAAAGTAGTAGAAATTGAACCACTAGGAGTAGCACCCACCAGGCCCAAAAGACCAGTGGTGAGGAGAGAAAGAAGAGCAGTGGCAATAGGAGCTGTATTCCTTGGGTTCTTGAGCGCAGCAGGAAGCACTATGGGCGCGGCGTCACTAACGCTGACGGTACAGGCCAGACAATTATTGTCTGGAATAGTGCAACAGCAGAACAATCTGCTGCAGGCTATTGAAGCGCAACAGCATATGTTGCAGCTCACAGTCTGGGGCATTAAACAGCTCCAGGCAAGAGTCCTGGCTGTGGAAAGATACCTAAAGGATCAACAGCTCCTAGGGCTTTGGGGATGCTCTGGAAAACTCATCTGCACCACTAATGTGCCCTGGAACTCTAGTTGGAGTAATAAATCTCAGGATGAGATTTGGAATAACATGACCTGGATGCAGTGGGAAAAAGAGATTAGCAATTACTCAAAAACAATATACATGTTAATTGAAAAATCGCAGAGCCAGCAGGAACGGAATGAACAAGAATTGTTGGAATTGGACAAGTGGGATAGTCTGTGGAGTTGGTTTGATATAACAAACTGGTTATGGTATATAAAAATATTCATAATGATAGTAGGAGGCTTGATAGGCTTAAGAATAGTTTTTGCTGTGCTTTCTATAGTAAATAGAGTTAGGAAGGGATACTCACCTTTGTCATTACAGACCCTTATCCCAGCCCCGACGGAACCCGACAGGCCCGAAGGAATCGAAGAAGGAGGTGGAGAGCAAGGCAAAGACAGATCCGTGCGATTAGTGAACGGATTCTTAGCTCTTGTCTGGGACGACTTGAGGAACCTGTGCCTCTTCAGCTACCGCCACTTGAGAGACTTCATATTAATTGCAGCGAGGATTGTGGACAGGGGACTGAGGAGGGGGTGGGAAGCCCTCAAATATCTGGGGAACATCATACAGTATTGGAGTCAGGAACTAAAGAATAGTGCTATTAGCTTGTTTAATACCACAGCAATAGTAGTAGCTGAGGGGACAGATAGAGTTATAGAAGCTTTGCAAAGAGCTGTTAGAGCTGTTCTCAACATACCTAGAAGAATAAGACAGAGAGTAGAAAGGGCTTTGATATAAAATGGGTGGCAAGTGGTCAAAAAGTAGTATAGTTGGATGGCCTGCTATAAGGGAAAGAATGAGACGACCCCCTCCAGCAGCAGCAGAAGGGGTGGGAGCAGTGTCTCAAGACTTAGAAAGACGGGGGGCAATTACAAGCAGCAATACTGGAGCTACTAATCCTGACTTGGCCTGGCTGGAAGCACAAGAGGACGAGGAAGTAGGCTTTCCAGTCAGACCCCAGGTACCTTTAAGACCAATGACTTATAAGGGAGCTTTTGATCTCAGTCAGTTTCNANAAGAAAAGGGGGGACTGGAAGGGTTAWTTTACTCCAAGAAAAGACAAGAGATCCTTGATCTGTGGCTTTACCACACACAAGGCTACTTCCCCTGATTGGCAGAACTACACACCAGGGCCGGGGGGTCAGATATCCCCTGACCTTTGGGTGGTGCTTCAAGCTAGTACCAGTTGAGCCAGAGGAGGTAGAAAAGGCCAATGAAGGAGAGAACAACTGCTTGCTACACCCCATGAGCCAACATGGAATGGAGGATGAAGACAGAGAAGTACTGAAATGGAAGTTTGACAGCCGCCTGGCACTGAAACACATAGCCAGAGAGAGACATCCGGAGTTCTACCGAGACTGAGATTGCTGACACAGAGATTGCTGACACAGAAGAATCTAAGGGACTTTCCACTGGGGACTTTCCAGAGGGCGGTCCAGAGGGCGGGACTGGGGAGTGGCTCACCCTCAGATGCTGCATATAAGCAGCCGCTTTTCGCTTGTACAGGGTCTCTCTGGTTAGACCAGATTTGAGCCTGGGAGCTCTCTGGCTAGCTGAGAACCCGCTGCTTAA
>F1.BR.93.93BR020_1_AF005494_H.BE.93.VI991_AF190127
CTGAAAGCGAAAGTAAACCAGAGAAGAACTCTCGACGCAGGACTCGGCTTGCTGAAGTGCACACGGCAAGAGGCGAGAGCGGCGACTGGTGAGTACGCCAAAATTTGACTAGCAGAGGCTAGAAGGAGAGAGATGGGTGCGAGAGCGTCAGTATTAAGCGGGGGAAAATTAGATGCTTGGGAAAAAATTCGGTTAAGGCCGGGGGGAAAGAAAAAATATAGACTAAAACATCTAGTATGGGCAAGCAGGGAGCTAGAACGATTTGCACTTGATCCAGGCCTTCTAGAAACATCAGAAGGCTGTCGAAAAATAATAGGACAGTTACAACCATCCCTTCAGACAGGATCAGAAGAGCTCAAATCATTATATAATACAATAGCAGTCCTCTATTATGTACATCAAAAGGTAGAGGTAAAAGACACCAAGGAGGCTTTAGAGAAGCTAGAGGAAGAACAAAACAAAGGTCGGCAAAAGACACAGCAAGCGACTGCTGAAAAAGGGGTCAGTCAAAATTACCCTATAGTACAGAATCTTCAGGGACAAATGGTACACCAGTCTTTATCACCTAGAACTTTAAATGCATGGGTAAAGGTGATAGAAGAGAAGGCTTTTAGTCCAGAAGTAATACCCATGTTTTCAGCATTATCAGAAGGGGCCACTCCACAAGATTTAAACACCATGTTAAATACAGTGGGGGGACATCAAGCAGCCATGCAAATGTTAAAAGACACCATCAATGAGGAGGCTGCAGAATGGGACAGATTACATCCAACACAGGCAGGACCCATCCCCCCAGGTCAGATAAGGGAACCTAGGGGAAGTGATATAGCTGGAACTACTAGTACCCTTCAGGAACAAATACAATGGATGACAGGCAACCCACCTGTCCCAGTGGGAGAAATGTATAAAAGATGGATCATCCTAGGATTAAATAAAATAGTAAGAATGTATAGCCCTGTCGGCATTTTGGACATAAGACAAGGGCCAAAAGAACCCTTTAGAGACTATGTAGACAGGTTCTTTAAAACCCTAAGAGCTGAGCAAGCTACACAGGAAGTAAAGGGTTGGATGACAGACACCTTGTTGGTCCAAAATGCGAACCCAGATTGTAAGACCATTTTAAAAGCATTGGGACCAGGGGCTACACTAGAGGAAATGATGACAGCATGTCAGGGAGTGGGAGGACCTAGCCATAAGGCAAGAGTTTTGGCTGAGGCAATGAGCCAAGCAACAAATACAGCTATAATGATGCAGAAAAGTAACTTTAAGGGCCAAAGAAGAATTGTTAAATGCTTTAATTGTGGCAAAGAAGGACACATAGCCAAAAATTGCAGGGCCCCTAGAAAAAAGGGCTGTTGGAAGTGTGGAAGAGAGGGACACCAAATGAAGGACTGCACTGAGAGACAGGCTAATTTTTTAGGGAAAATTTGGCCTTCCAACAAGGGGAGGCCCGGAAACTTCATCCAGAACAGGCCAGAGCCGTCAGCCCCGCCAGCAGAGAGCTTCAGGTTCGGGGAGGAGACAACCCCATCTCCGAAGCAGGAGCAGAAAGACGAGGGACTGTACCCTCCCTTAGCTTCCCTCAAATCACTCTTTGGCAACGACCCCTAGTCACAATAAGAGTAGGGGGACAGCTAAAGGAAGCTCTATTAGATACAGGAGCAGATGATACAGTATTAGAAGACGTAAATTTGCCAGGAAAATGGAAACCAAAAATGATAGGGGGAATTGGAGGTTTTATCAAAGTAAAACAGTATGATAGCATACTCATAGAAATTTGTGGACACAGAGCTATAGGTACAGTGTTAGTAGGACCTACGCCTGTCAACATAATTGGAAGAAATATGTTGACCCAGATTGGTTGTACTTTACATTTTCCAATTAGTCCTATTGAGACTGTACCAGTAAAATTGAAGCCAGGAATGGATGGCCCAAAGGTTAAACAATGGCCATTGACAGAAGAAAAAATAAAAGCATTAACAGAAATATGTATGGAAATGGAAAAGGAAGGAAAAATTTCAAAAATTGGGCCTGAAAATCCATACAATACTCCAGTATTTGCCATAAAGAAAAAAGACAGTACTAAATGGAGGAAATTAGTAGATTTCAGAGAACTTAATAAAAGAACTCAAGATTTTTGGGAGGTTCAATTAGGAATACCGCATCCAGCAGGGTTAAAAAAGAAAAAGTCAGTAACAGTACTGGATGTGGGGGATGCATATTTTTCAGTTCCCTTAGATAAGGATTTCAGGAAGTACACTGCATCCACCATACCTAGTACCAACAATGAGACACCAGGAGTTAGGTACCAGTACAATGTGCTTCCACAAGGATGGAAAGGATCACCAGCAATATTCCAATATAGCATGACAAAAATCTTAGATCCCTTTAGAGCAAAAAATCCAGACATAGTTATCTACCAATACATGGATGATTTGTATGTAGGGTCTGACTTAGAAATAGGACAGCATAGAACAAAAATAGAAGAGTTAAGAGAACATCTACTGAAATGGGGATTAACTACACCAGACAAAAAACATCAAAAAGAACCCCCATTCCTTTGGATGGGGTATGAACTCCATCCTGATAAATGGACAGTGCAGCCTATACAATTGCCAGACAAGGACAGCTGGACTGTCAATGATATACAGAAGTTAGTAGGAAAACTAAATTGGGCAAGTCAGATTTATCCAGGGATTAAAGTAAAACAATTATGTAAACTCCTTAGGGGAGCCAAGGCACTAACAGACATAGTGCCACTGACTACAGAAGCAGAGTTAGAATTGGCAGAGAATAGGGAGATTCTAAAAGAACCAGTACATGGGGCATATTATGACCCGTCAAAAGACTTAATAGCAGAAATACAGAAACAAGGGCAAGGGCAATGGACATATCAAATTTATCAAGAGCCATTTAAAAATCTAAAAACAGGAAAGTATGCAAAAATGAGGTCTGCCCACACTAATGATGTAAAACAGTTAACAGAAGCAGTGCAAAAGATATCTCTAGAAAGCATAGTAATATGGGGCAAGACTCCTAAGTTTAGACTACCCATATTAAAAGAGACATGGGATACATGGTGGACAGAGTACTGGCAAGCCACCTGGATTCCTGAGTGGGAGTTTGTCAATACCCCCCCTCTAGTAAAACTATGGTATCAGTTAGAAACAGAGCCCATAGTAGGAGCAGAAACCTTCTATGTAGATGGGGCATCTAATAGAGAGACCAAAAAAGGAAAAGCAGGATATGTTACTGACAGAGGAAGACAAAAAGCGGTCTCCCTAACTGAGACTACAAATCAGAAGGCTGAGTTACAAGCAATTCAGTTAGCTTTACAGGATTCAGGATCAGAAGTAAACATAGTAACAGACTCACAGTATGCATTAGGAATCATTCAAGCACAACCAGATAAGAGTGAATCAGAGTTAGTCAATCAAATAATAGAGCAATTAATAAAAAAGGAAAAGGTCTACCTGTCATGGGTACCAGCACACAAAGGGATTGGAGGAAATGAACAAGTAGATAAATTAGTCAGTGCTGGAATCAGGAAAGTACTGTTTCTAGATGGGATAGATAAGGCACAAGAGGAACATGAAAAATATCACAACAATTGGAGAGCAATGGCTAGTGATTTTAATATACCAGCTGTAGTAGCAAAAGAAATAGTAGCTAGCTGTGATAAATGTCAGCTAAAAGGGGAAGCCATGCATGGACAAGTAGATTGTAGCCCAGGGATATGGCAATTAGATTGCACACATTTAGAAGGAAAAATTATCCTGGTAGCAGTCCATGTAGCTAGTGGGTACCTAGAAGCAGAAGTTATCCCAGCAGAAACAGGACAAGAGACAGCCTACTTCCTACTAAAGTTAGCAGGAAGATGGCCAGTAAAAACAATACATACAGACAATGGCACCAATTTCACCAGTGCCACGGTTAAGGCAGCTTGTTGGTGGGCAGGTATCCAGCAGGAATTTGGAATTCCTTACAACCCCCAAAGTCAAGGAGTAGTAGAATCTATGAATAAAGAGCTAAAGAAAATCATAGGACAGATAAGAGATCAAGCTGAACATCTTAAGACAGCAGTCCAAATGGCAGTATTCATTCACAATTTTAAAAGAAAAGGGGGGATTGGGGGATACAGTGCAGGGGAAAGAACAATAGACATAATAGCAACAGACATACAAACTAGAGAATTACAAAAACAAATTATAAAAATTCAAAATTTCCGGGTTTATTACAGGGACAGCAGAGACCCAGTTTGGAAAGGACCAGCAAAGCTACTCTGGAAAGGTGAAGGGGCAGTAGTCATACAAGACAATAGTGAAATAAAGGTAGTTCCAAGAAGAAAAGCAAAGATCATTAGGGATTATGGAAAACAGATGGCAGGTGATGATTGTGTGGCAGGTAGACAGGATGAGGATTAACACATGGAAAAGTTTAGTAAAATACCATATGCATATTTCAAAGAAAGCCAAAGGATGGTTTTATAGACATCACTTTGAAAGCAGGCATCCAAAAATAAGTTCAGAAGTACACATCCCACTAGAGACAGCTGAATTAGTAATAACAACATACTGGGGGCTGCTTCCAGGAGAAAGAGAATGGCATCTGGGTCAGGGAGTCTCCATAGAATGGAGGCAGGGGAGGTATAGAACACAAATAGACCCTGGCCTGGCAGACCAACTGATCCATATATATTATTTTGATTGTTTTTCAGAATCTGCCATAAGGAAAGCCATATTAGGACATAAAATTAGCCCTAGGTGTAACTATCAAGCAGGACATAACAAGGTAGGATCTCTACAATACTTGGCACTAACAGCATTAATAGCTCCAAAAAAGACAAAGCCGCCTTTGCCTAGTGTCCAGAAACTAGTAGAAGACAGATGGAACAAGCCCCAGAAGACCAGGGGCCACAGAGAGAGCCATACAATGAATGGACACTAGATCTTTTAGAGGAGCTTAAGAATGAAGCTGTTAGACATTTTCCTAGGCCATGGCTCCATAGCTTAGGACAACATATCTATAACACCTATGGGGATACTTGGGAAGGAGTTGAAGCAATCATAAGGATATTGCAACAACTACTGTTTATCCATTTCAGAATTGGGTGCCGTCATAGCAGAATAGGCATTACTCGACAGAGAAGAGTAAGAAATGGAACTAGTAGATCCTAACTTAGATCCCTGGAACCATCCAGGAAGCCAGCCTACAACTCCTTGTACCAGATGTTATTGTAAATGGTGTTGCTTTCATTGTTACTGGTGCTTTACAACGAAGGGCTTAGGCATCTCCTATGGCAGGAAGAAGCGGAGACAGCGACCAAGAACTCCTCAAAGCAGTCAGATACATCAAGATTTTGTACCAAAGCAGTAAGTATTGTTAAGCATATGTAATGTCAAATTTGTTAGCAATAGGCATAGCAGCATTAATAGTAGCACTAATAATAACAATAGTTGTGTGGACTATAGCATATATAGAATATAAGAAACTGGTAAGGCAAAGAAAAATAAATAGGTTATATAAAAGAATAAGCGAAAGAGCAGAAGACAGTGGCAATGAGAGTGAGGGGGATGCAGAGGAATTGGCAGCACTTGGGGAAGTGGGGCCTTTTATTCCTGGGGACATTAATAATCTGTAATGCTGCAGAAAACTTATGGGTTACAGTCTATTATGGGGTACCTGTGTGGAAAGAAGCAACCACTACTCTATTCTGTGCATCAGATGCTAAATCATATGAAAAAGAGGCACATAATGTCTGGGCTACACATGCTTGTGTACCCACAGATCCCAATCCACAAGAAGTAGTTCTGGAAAATGTAACAGAAAGGTTTAATATGTGGGAAAATAACATGGTAGAACAAATGCATACAGATATAATCAGTTTATGGGATCAAAGCCTAAAGCCATGTGTGAAGTTAACCCCACTCTGTGTTACTTTAGATTGTAGAAACATTGCCACCAATGGCACCAATGACACTATTGCCATCAATGACACTCTGAAGGAAGATCCAGAGGCAATACAAAACTGTTCTTTCAATACAACCACAGAAATAAGAGATAAGCAGCTGAAAGTACATGCACTTTTTTATAAACTTGATATAGTACAAATCAACAAGGATGACAATAGAACATACAGACTAATAAATTGTGATGCCTCAACCATTACACAGGCTTGTCCAAAGGTATCTTGGGATCCAATTCCCATACATTATTGTGCTCCAGCTGGTTATGCGATTCTAAAGTGTAATGAGAAAAATTTCACAGGGACAGGGTCATGCAAGAATGTCAGTACAGTACAATGTACACATGGAATTAAACCAGTGGTATCCACTCAATTGTTGTTAAATGGCAGCCTAGCAGAAGGAGAGATAGTAATCAGATCTCAAAATATCTCAGATAATGCAAAAACCATAATAGTGCACCTTAATGAATCTGTACAGATTAATTGTACAAGACCCAACAACAATACAAGAAAAAGAATATCTTTAGGACCAGGACGAGTATTTTATACAACAGGAGAAATAATAGGAGACATCAGAAAGGCACATTGTAACGTTAGTGGAACACAATGGAGGAACACGTTAGCAAAGGTAAAGGCAAAGTTAGGGTCTTATTTCCCTAATGCAACAATAAAATTTAACTCATCCTCAGGAGGGGACCTAGAAATTACAAGGCATAATTTTAATTGTATGGGAGAATTTTTCTACTGTAATACAGATGAACTGTTTAATGACACAAAATTCAATGACACAGGATTCAATGGCACTATCACTCTACAATGCAAAATAAAACAAATTGTGAACATGTGGCAGAGAGTAGGACAAGCAATGTATGCCCCTCCCATCAGAGGAAACATCACATGTATATCAAATATTACAGGACTAATATTGACATTTGACCGGAATAATACAAATAATGTTACCTTCAGACCTGGAGGAGGAGATATGAGGGACAATTGGAGAAGTGAATTATATAAATATAAAGTAGTAAAAATTGAACCACTGGGAGTAGCACCAACCGAGGCAAAAAGACAAGTGGTGAAGAGAGAAAGAAGAGCAGTGGGACTAGGAGCTCTGTTCCTTGGGTTCTTGGGAGCAGCTGGAAGCACTATGGGCGCGGCGTCAATAACGCTGACGGTACAGGCCAGACAATTATTGTCTGGAATAGTGCAACAGCAGAGCAATCTGCTGAGGGCTATTGAAGCGCAACAGCATCTGTTGCAGCTCACAGTCTGGGGCATTAAACAGCTCCAGGCAAGAGTCCTGGCTGTGGAAAGATACCTAAAGGATCAACAGCTCCTAGGGCTTTGGGGCTGCTCTGGAAAACTCATCTGCACCACTAATGTGCCCTGGAACTCTAGTTGGAGTAATAAATCTCTTGAGGAGATTTGGGGGAACATGACCTGGATGGAGTGGGAAAAAGAGGTTAGCAATTACTCAAAAGAAATATACAGGTTAATTGAAGACTCGCAGAACCAGCAGGAAAAGAATGAACAAGAATTATTAGCATTGGACAAATGGGCAAGTCTGTGGAATTGGTTTGACATAACACAGTGGCTGTGGTATATAAAAATATTCATAATGATAGTAGGAGGCTTGATAGGCTTAAGAATAGTTTTTACTGTGCTTTCTATAGTAAATAGAGTTAGGAAGGGATACTCACCTTTGTCATTTCAGACCCATATCCCAAGCCCGAGGGAACCCGACAGGCCCGAAGGAATCGAAGAAGGAGGTGGAGAGCAAGGCAAAGACAGATCCGTGAGATTAGTGACCGGATTCTTAGCTCTTGCCTGGGACGACCTGCGGAACCTGTGCCTCTTCAGCTACCGCCACTTGAGAGACTTCATATTAATTGCAGCGAGGATTGTGGACAGGGGGCTGAAGAGGGGGTGGGAAGCTCTCAAATATCTGGGGAATCTCACACAGTATTGGGGTCAGGAACTAAAGAATAGTGCTATTAGCTTGCTTAATGCCACAGCAATAGCAGTAGCTGAGTGGACAGATAGAGTTATAGAAGCTTTGCAAAGAGCTGGTAGAGCTATTCTCAACATACCTAGAAGAATAAGACAGGGCTTGGAAAGGGCTTTGCTATAAAATGGGTGGCAAGTGGTCAAAAAGTAGTATAGTTGGATGGCCTGCTATAAGGGAAAGAATGAGGCGAACCCCTCCAACCCCTCCAGCAGCAGAGGGGGTGGGAGCAGTGTCTCAAGACTTAGAAAGACGGGGGGCAATTACAAGCAGCAATACTAGAGCTAATAATCCTGACTTGGCCTGGCTGGAAGCACAAGAGGAAGACGAAGTAGGCTTTCCAGTCAGACCTCAGGTACCTTTAAGACCAATGACCTATAAGGGAGCTGTAGATCTCAGTCACTTTTTAAAAGAAAAGGGGGGACTGGAAGGGTTAATTTACTCCAAGAGAAGACAAGAGATCCTTGATCTGTGGGTCTACCACACACAAGGCTACTTCCCTGATTGGCAGAACTACACACCAGGGCCAGGGATCAGATATCCACTGACCATGGGGTGGTGCTTCAAGCTAGTACCAGTTGACCCAGAGGAGGTAGAAAAGGCCAATGAAGGAGAGAACAACTGCTTGCTACACCCCATGAGCCAACATGGAATGGAGGATGAAGACAAAGAAGTACTGAAATGGGAGTTTGACAGCCGCTTGGCACTGAGACACATAGCCAGAGAGAGACATCCGGAGTACTACCAAGACTGAGACTGCTGACACAGAGATTGCTGACACAGAAGAATCTAAAGGGACTTTCCACTGGGGACTTTCCAGAGGGTGGGCCAGAGGGCGGGACTGGGGAGTGGCTCACCCTCAGATGCTGCATATAAGCAGCCGCTTTTCGCCTGTACTGGGTCTCTCTAGTTAGACCAGATTTGAGCCCGGGAGCTCTCTGGCTAGCTAGGGAACCCACTGCTTAAGCCTCAATAAAGCTTGCCTTGAGTGCTTT
>F1.FI.93.FIN9363_AF075703_J.SE.94.SE7022_AF082395
AAAGCGAAAGTAGAACCAGAGAAGATCTCTCGACGCAGGACTCGGCTTGCTGAAGTGCACACGGCAAGAGGCGAGAGCGGCGACTGGTGAGTACGCCAATTTTTGACTAGCGGAGGCTAGAAGGAGAGAGATGGGTGCGAGAGCGTCAGTATTAAGCGGGGGAAAACTAGATGCATGGGAAAAAATTCGGTTAAGGCCGGGGGGAAAGAAACAATATAGAATAAAACATCTAGTATGGGCAAGCAGGGAGCTAGAACGATTTGCAATAGATCCTGGCCTTCTAGAAACATCAGAAGGCTGTCAAAAAATAATAGCACAGATACAGCCATCCATTCAGACAGGATCAGAAGAGCTTAGATCATTATATAACACAATAGCAGTCCTCTATTTTGTACATCAAAAGATAGAGGTAAAGGACACCAAGGAAGCTTTAGATAAGCTAGAGGAAGAACAAAACAAAAGTCAGCAAAAGACACAGCAAGCGGCAGCTGCAGCTGACAAAGGGGTCAGTCAAAATTACCCTATAGTACAGAATCTTCAGGGACAAATGGTACATCAGGCTATATCACCTAGAACTTTAAATGCATGGGTAAAGGTGATAGAAGAGAAGGCTTTTAGCCCAGAAGTTATACCCATGTTTTCAGCATTATCAGAAGGGGCCACTCCACAAGATTTAAACACCATGCTAAATACAGTGGGGGGACATCAAGCAGCCATGCAAATGTTAAAAGACACCATTAATGAGGAAGCTGCAGAATGGGACAGATTACATCCAGTGCATGCAGGACCTATTCCACCAGGCCAGATGAGGGAACCTAGGGGAAGCGATATAGCTGGAACTACTAGTACCCTTCAGGAACAAATACAATGGATGACAAGTAACCCACCTGTCCCAGTGGGAGACATCTATAAAAGATGGATCATCCTAGGATTAAATAAAATAGTAAGGATGTATAGCCCTGTCAGCATTTTGGACATAAGACAAGGGCCAAAAGAACCCTTTAGAGACTATGTAGACAGGTTCTTTAAAGCTCTAAGAGCTGAGCAAGCTACACAGGAAGTAAAGGGTTGGATGACAGACACCTTGTTGGTCCAAAATGCGAATCCAGATTGTAAGATCATTTTAAAAGGATTGGGAATAGGGGCTACACTAGAAGAAATGATGACAGCATGTCGGGGAGTGGGAGGACCTGGCCATAAGGCAAGAATTTTGGCTGAGGCAATGAGCCAAGCAAATACAACCATAATGATGCAGAAAAGTAATTTTAGGGGCCAAAGAAGAATTGTTAAATGTTTTAATTGTGGCAAAGAAGGACACATAGCCAGAAATTGCAGGGCCCCCAGGAAAAAGGGCTGTTGGAAATGTGGACAAGAAGGGCACCAAATGAAAGACTGCACTGAAAGACAGGCTAATTTTTTAGGGAAAATTTGGCCTTCCAACAAGGGGAGGCCCGGAAATTTCCTTCAGAGTAGACCAGAGCCAACAGCCCCGCCAGCAGAGAGCCTCGGGATCAGAGAAGAGGTAACTCCCTCTCCGAGGCAGGAGCAGAAAGAAGAGGGACAGTACCCTCCCTTAGCTTCCCTCAAATCACTCTTTGGCAACGACCCCTAGTCACAATAAAAATAGGGGGACAGCTAAAGGAAGCTCTATTAGATACAGGAGCAGATGATACAGTATTAGAAGACATAAATTTGCCAGGAAAATGGAAACCAAAAATGATAGGGGGAATTGGAGGTTTTATTAAAGTAAAACAGTATGATCACATACTCATAGAAATTTGTGGACATAAAGCCATAGGTACAGTGTTAGTAGGACCTACGCCTGTCAACATAGTTGGAAGAAATATGTTGACTCAAATTGGTTGTACTTTAAATTTTCCAATTAGTCCTATTGAAACTGTACCAGTAAAACTGAAACCAGGAATGGATGGCCCAAAGGTTAAACAATGGCCATTGACAGAAGAAAAAATAAAAGCATTAACAGAGATATGTACAGATATGGAAAAAGAAGGAAAAATTTCAAGAATTGGGCCTGAAAATCCATACAATACTCCAGTATTTGCCATAAAGAAAAAAGACAGTACTAAATGGAGGAAGTTAGTAGATTTCAGAGAACTCAATAAAAGAACTCAAGATTTTTGGGAGGTTCAATTAGGAATACCACATCCTGCAGGGTTAAAAAAGAAAAAGTCAGTAACAGTACTGGATGTGGGGGATGCATATTTTTCAGTTCCCTTAGATAAAGATTTCAGGAAGTACACTGCATTCACCATACCTAGTGTCAACAATGAGACACCAGGAATTAGGTACCAGTACAATGTGCTTCCACAAGGATGGAAAGGATCACCAGCAATATTCCAATGTAGCATGACAAAAATCTTAGAGCCCTTTAGAACAAGAAATCCAGACATAGTTATCTACCAATACATGGATGATTTGTATGTAGGGTCTGACTTAGAAATAGGGCAGCATAGAACAAAAATAGAGGAGTTAAGAGAACATCTACTGAAATGGGGATTTACTACACCAGACAAAAAACATCAGAAAGAACCTCCATTCCTCTGGATGGGGTATGAACTCCATCCTGATAAATGGACAGTGCAGCCTATACAATTGCCAGACAAGGACAGCTGGACTGTCGATGATATACAGAAATTAGTAGGAAAACTAAACTGGGCAAGTCANATTTATCCAGGGATTAAAGTAAGGCAATTATGTAAACTCCTTAGAGGAGCCAAGGCACTAACAGACATGGTGCCACTGACTGCAGAAGCAAATTTAGAATTGGCAGAAAATAGGGAGATTCTAAAAGAACCAGTACATGGGGTATATTATGACCCATCAAAAGACTTAATACCAAAATTACAGAAACAAGGGCAAGGACAATGGACATATCAAATTTACCGAGAGCCATTTAAAAATCTAAAAACAGGAAAGTATGCAAAAATGAGGTCTGCCCACACTAATGATGTAAAACAATTAACAGAAGCAGTGCAAAAGATAGCTCTAGAAAGCATAGTAATATGGGGAAAGACTCCTAAGTTTAAACTACCTATTCTAAAAGAGACATGGGATACATGGTGGACAGAGTATTGGCAAGCCACCTGGATTCCTGAGTGGGAGTTTGTCAATACCCCCCCTCTAGTAAAACTATGGTATCAATTAGAAACAGAGCCCATAGCAGGAGCAGAAACATTCTATGTGGATGGGGCATCTAATAGAGAGACCAAAAAAGGAAAAGCAGGATATGTTACTGATAGAGGAAGACAAAAGGTTGTCTCCCTAACTGAGACCACAAATCAGAAGGCTGAGTTACAAGCAATTCATTTAGCTTTACAGGATTCAGGATCAGAAGTGAACATAGTAACAGATTCACAATATGCATTAGGAATCATTCAAGCACAACCAGATAAGAGTGAATCAGAGTTAGTCAATCAAATAATAGAGCAGTTAATACAAAAGGAAAAGATCTACCTGTCATGGGTACCAGCACACAAAGGGATTGGAGGAAATGAACAAGTAGATAAATTAGTCAGTGCTGGAATCAGAAAAATACTGTTTTTAGATGGGATAGATAAGGCACAAGAGGAACATGAAAAATATCACAACAATTGGAGAGCAATGGCTAGTGATTTTAATCTGCCACCTGTAGTAGCAAAAGAAATAGTAGCTAGCTGTGATAAGTGTCAGCTAAAAGGGGAAGCCATGCATGGACAAGTAGACTGTAGTCCAGGGATATGGCAATTAGATTGTACACATTTAGAAGGAAAAATTATCCTGGTAGCAGTCCATGTAGCTAGTGGATACATAGAAGCAGAAGTTATCCCAGCAGAAACAGGACAGGACACAGCCTACTTCATACTAAAGTTAGCAGGAAGATGGCCAGTAAAAATGATACATACAGACAATGGCAGCAATTTCACCAGTGCCGCGGTTAAGGCAGCCTGTTGGTGGGCAGGTATCCAGCAGGAATTTGGAATTCCCTATAACCCCCAAAGTCAAGGAGTAGTAGAATCAATGAATAAAGAGCTAAAGAAGATCATAGGACAGGTAAGAGATCAAGCTGAACATCTTAAGACAGCAGTACAAATGGCAGTATTCATCCACAATTTTAAAAGAAAAGGGGGGATTGGGGGGTACAGTGCAGGGGAAAGAATAATAGACATAATAGCAACAGACATACAAACTAAAGAATTACAAAAACAAGTTACAAAAATTCAAAATTTCCGGGTTTATTACAGGGACAGCAGAGACCCAGTTTGGAAAGGACCAGCAAAGCTACTCTGGAAAGGTGAAGGGGCAGTAGTCATACAAGACAATAGTGAAATAAAAGTAGTGCCAAGAAGAAAAGCAAAGATCATTAGGGATTATGGAAAACAGATGGCAGGTGACGATTGTGTGGCAGGTAGACAGGATGAGGATTAACACATGGAAAAGTTTAGTAAAATACCATATGCATGTTTCAAAGAAAGCCAAAAGATGGTTTTATAGACATCACTTTGAAAGCAGACATCCAAAAATAAGTTCAGAAGTACACATCCCCCTAGAGGAAGCTGAATTAGTAATAACAACATATTGGGGGCTGAATACAGGAGAAAGAGATTGGCATCTGGGTCAAGGAGTCTCCATAGAATGGAGGCAGGGGAGGTATAGGACACAAATAGACCCTGGCCTGGCAGACCAACTGATCCATATATATTACTTTGATTGTTTTTCAGAATCTGCCATAAGGAAAGCCATATTAGGACATAGAATTAGCCCTAGGTGTGACTATCAAGCAGGACATAACAAGGTAGGATCCCTACAATATTTGGCACTAACAGCATTAGTATCTCCAAAGAAGGCAAAGCCGCCTTTGCCTAGTGTCAAGAAACTAGTAGAAGACAGATGGAACAAGCCCCAGGAGATCAGGGGCCACAGAGGGAGCCATACAATGAATGGGCACTAGAACTTTTAGAGGAGCTTAAGAACGAAGCTGTTAGACATTTTCCTAGGCCATTCCTCCATGGCATAGGACAATATATCTATAACACCTATGGGGATACTTGGGAGGGAGTTGAAGCCATAATAAAAATATTGCAGCAACTACTGTTTATCCATTTCAGAATTGGGTGCCATCATAGCAGAATAGGCATTATTCGACAGAGAAGAGTAAGAAATGGAGCTAGTAGATCCTAATTTAGATCCCTGGAACCATCCAGGAAGCCAGCCTCCAACTCCTTGTAACAAATGCTATTGTAAACGGTGTTGCTTTCATTGCTACTGGTGCTTTGCAACGAAGGGCTTAGGCATCTCCTATGGCAGGAAGAAGCGGAGACAGCGACACAGAACTCCTCAAAGCAGTCAAATACATCAAGATCCTGTACCAAAGCAGTAAGTATTGTTAAGTAGTGTATGTAATGTCAGATTTGTTAGCAATAACGATAGTAGCATTTATAGTAGCCCTAATAATAGTAATAGTTGTGTGGACCATAGTATTTATAGAATATAAGAAGCTAGTAAGGCAAAGAAAAATAAATAGGTTGTATATAAGAATAAGAGAAAGAGCAGAAGACAGTGGCAATGAGAGTGAGGGGGATGCAGAGGAATTGGCAGCACTTGGGAAAATGGGGCCTTTTATTCCTGGGGATGTTAATAATCTGTAAAGCTGCGGATGACTTGTGGGTCACAATCTATTATGGGGTACCTGTGTGGAAAGAAGCAAACACCACTTTATTCTGTGCATCAGATGCTAAATCATATGAAAAAGAAGTACATAATGTCTGGGCTACACATGCCTGTGTACCCACAGACCCCAATCCACAAGAAGTAGCTCTAAATGTGACAGAAAATTTTAATATGTGGGAAAATGACATGGTAGAACAAATGCATAAAGATATAATCAGTTTATGGGATCAAAGTCTAAAGCCATGTGTAAAGCTAACCCCACTCTGTGTTACTTTAAATTGTACTAATGCCACTACCACCAATGACACTCTCTCTGACCAAAGCAGTACCCTGAAGGAAGAACCAGGGGCAATACAAAACTGTTCTTTCAATATGACCACAGAAGTAGAAGATAAGAAGCAGAAAGTACATGCGCTTTTTTATAGACTTGATATAGAACCAATCAGCAATAATAATAGCAGGGAAGAATATAGGCTAATAACTTGTAATACCTCAACCATTACACAGGCTTGTCCAAAGGTATCTTGGGATCCAATTCCCATACATTATTGTGCTCCAGCTGGTTATGCGATTCTAAAGTGTAAGGATAAAAGGTTCAATGGGACGGGGCCATGTAGGAATGTCAGCACAGTACAATGTACACATGGAATTAGGCCAGTGGTATCAACTCAATTGTTGTTAAATGGCAGCCTATCAGAAGGAGGTATAATAATCAGATCTCAAAATCTCTCAGATAATGCAAAAACTATAATAGTACACCTTAATGAATCTGTACAGATCAATTGTACAAGACCCAACAACAATACAAGAAAAAGTATACGTATAGGACCAGGACAATCATTTTATGCAACAGGAGAAATAATAGGAGACATAAGAAAGGCACATTGTAACATTAGTGGAGAACAATGGAATAAAACTTTAGACCGAGTAAAGGCAGAGTTAAAGCTTCATTTTAATAAAACAATACAATTTAACTCATCCTCAGGAGGGGACATAGAAATTACAACACATAGTTTTAATTGTGGAGGAGAATTTTTCTATTGTAATACATCAACACTGTTCAATAGTAGTTGGGATGAGAATAACATTAAGGACACAAATAGTACAAATGACAACACAACTATCACAATACCATGTAAAATAAAACAAATTGTGAGAATGTGGCAAAGAACAGGACAAGCAATATATGCCCCTCCCATCGCAGGAAACATTACATGCAAATCAAATATTACAGGTCTGCTATTGACAAGAGATGGTGGTCAGAGTAATAATAGTGATTCTGAGACCTTCAGACCTGGGGGAGGAGATATGAAAGACAATTGGAGAAGTGAACTATATAAATATAAAGTAGTAGAAATTGAACCACTAGGAGTAGCACCCACCAGGCCCAAAAGACCAGTGGTGAGGAGAGAAAGAAGAGCAGTGGCAATAGGAGCTGTATTCCTTGGGTTCTTGAGCGCAGCAGGAAGCACTATGGGCGCGGCGTCACTAACGCTGACGGTACAGGCCAGACAATTATTGTCTGGAATAGTGCAACAGCAGAACAATCTGCTGCAGGCTATTGAAGCGCAACAGCATATGTTGCAGCTCACAGTCTGGGGCATTAAACAGCTCCAGGCAAGAGTCCTGGCTGTGGAAAGATACCTAAAGGATCAACAGCTCCTAGGGCTTTGGGGATGCTCTGGAAAACTCATCTGCACCACTAATGTGCCCTGGAACTCTAGTTGGAGTAATAAATCTCAGGATGAGATTTGGAATAACATGACCTGGATGCAGTGGGAAAAAGAGATTAGCAATTACTCAAAAACAATATACATGTTAATTGAAAAATCGCAGAGCCAGCAGGAACGGAATGAACAAGAATTGTTGGAATTGGACAAGTGGGATAGTCTGTGGAGTTGGTTTGATATAACAAACTGGTTATGGTATATAAAAATATTCATAATGATAGTAGGAGGCTTGATAGGCTTAAGAATAGTTTTTGCTGTGCTTTCTATAGTAAATAGAGTTAGGAAGGGATACTCACCTTTGTCATTACAGACCCTTATCCCAGCCCCGACGGAACCCGACAGGCCCGAAGGAATCGAAGAAGGAGGTGGAGAGCAAGGCAAAGACAGATCCGTGCGATTAGTGAACGGATTCTTAGCTCTTGTCTGGGACGACTTGAGGAACCTGTGCCTCTTCAGCTACCGCCACTTGAGAGACTTCATATTAATTGCAGCGAGGATTGTGGACAGGGGACTGAGGAGGGGGTGGGAAGCCCTCAAATATCTGGGGAACATCATACAGTATTGGAGTCAGGAACTAAAGAATAGTGCTATTAGCTTGTTTAATACCACAGCAATAGTAGTAGCTGAGGGGACAGATAGAGTTATAGAAGCTTTGCAAAGAGCTGTTAGAGCTGTTCTCAACATACCTAGAAGAATAAGACAGAGAGTAGAAAGGGCTTTGATATAAAATGGGTGGCAAGTGGTCAAAAAGTAGTATAGTTGGATGGCCTGCTATAAGGGAAAGAATGAGACGACCCCCTCCAGCAGCAGCAGAAGGGGTGGGAGCAGTGTCTCAAGACTTAGAAAGACGGGGGGCAATTACAAGCAGCAATACTGGAGCTACTAATCCTGACTTGGCCTGGCTGGAAGCACAAGAGGACGAGGAAGTAGGCTTTCCAGTCAGACCCCAGGTACCTTTAAGACCAATGACTTATAAGGGAGCTTTTGATCTCAGTCAGTTTCNANAAGAAAAGGGGGGACTGGAAGGGTTAWTTTACTCCAAGAAAAGACAAGAGATCCTTGATCTGTGGCTTTACCACACACAAGGCTACTTCCCCTGATTGGCAGAACTACACACCAGGGCCGGGGGGTCAGATATCCCCTGACCTTTGGGTGGTGCTTCAAGCTAGTACCAGTTGAGCCAGAGGAGGTAGAAAAGGCCAATGAAGGAGAGAACAACTGCTTGCTACACCCCATGAGCCAACATGGAATGGAGGATGAAGACAGAGAAGTACTGAAATGGAAGTTTGACAGCCGCCTGGCACTGAAACACATAGCCAGAGAGAGACATCCGGAGTTCTACCGAGACTGAGATTGCTGACACAGAGATTGCTGACACAGAAGAATCTAAGGGACTTTCCACTGGGGACTTTCCAGAGGGCGGTCCAGAGGGCGGGACTGGGGAGTGGCTCACCCTCAGATGCTGCATATAAGCAGCCGCTTTTCGCTTGTACAGGGTCTCTCTGGTTAGACCAGATTTGAGCCTGGGAGCTCTCTGGCTAGCTGAGAACCCGCTGCTTAA
>F1.FI.93.FIN9363_AF075703_K.CM.96.MP535_AJ249239
AAAGCGAAAGTAGAACCAGAGAAGATCTCTCGACGCAGGACTCGGCTTGCTGAAGTGCACACGGCAAGAGGCGAGAGCGGCGACTGGTGAGTACGCCAATTTTTGACTAGCGGAGGCTAGAAGGAGAGAGATGGGTGCGAGAGCGTCAGTATTAAGCGGGGGAAAACTAGATGCATGGGAAAAAATTCGGTTAAGGCCGGGGGGAAAGAAACAATATAGAATAAAACATCTAGTATGGGCAAGCAGGGAGCTAGAACGATTTGCAATAGATCCTGGCCTTCTAGAAACATCAGAAGGCTGTCAAAAAATAATAGCACAGATACAGCCATCCATTCAGACAGGATCAGAAGAGCTTAGATCATTATATAACACAATAGCAGTCCTCTATTTTGTACATCAAAAGATAGAGGTAAAGGACACCAAGGAAGCTTTAGATAAGCTAGAGGAAGAACAAAACAAAAGTCAGCAAAAGACACAGCAAGCGGCAGCTGCAGCTGACAAAGGGGTCAGTCAAAATTACCCTATAGTACAGAATCTTCAGGGACAAATGGTACATCAGGCTATATCACCTAGAACTTTAAATGCATGGGTAAAGGTGATAGAAGAGAAGGCTTTTAGCCCAGAAGTTATACCCATGTTTTCAGCATTATCAGAAGGGGCCACTCCACAAGATTTAAACACCATGCTAAATACAGTGGGGGGACATCAAGCAGCCATGCAAATGTTAAAAGACACCATTAATGAGGAAGCTGCAGAATGGGACAGATTACATCCAGTGCATGCAGGACCTATTCCACCAGGCCAGATGAGGGAACCTAGGGGAAGCGATATAGCTGGAACTACTAGTACCCTTCAGGAACAAATACAATGGATGACAAGTAACCCACCTGTCCCAGTGGGAGACATCTATAAAAGATGGATCATCCTAGGATTAAATAAAATAGTAAGGATGTATAGCCCTGTCAGCATTTTGGACATAAGACAAGGGCCAAAAGAACCCTTTAGAGACTATGTAGACAGGTTCTTTAAAGCTCTAAGAGCTGAGCAAGCTACACAGGAAGTAAAGGGTTGGATGACAGACACCTTGTTGGTCCAAAATGCGAATCCAGATTGTAAGATCATTTTAAAAGGATTGGGAATAGGGGCTACACTAGAAGAAATGATGACAGCATGTCGGGGAGTGGGAGGACCTGGCCATAAGGCAAGAATTTTGGCTGAGGCAATGAGCCAAGCAAATACAACCATAATGATGCAGAAAAGTAATTTTAGGGGCCAAAGAAGAATTGTTAAATGTTTTAATTGTGGCAAAGAAGGACACATAGCCAGAAATTGCAGGGCCCCCAGGAAAAAGGGCTGTTGGAAATGTGGACAAGAAGGGCACCAAATGAAAGACTGCACTGAAAGACAGGCTAATTTTTTAGGGAAAATTTGGCCTTCCAACAAGGGGAGGCCCGGAAATTTCCTTCAGAGTAGACCAGAGCCAACAGCCCCGCCAGCAGAGAGCCTCGGGATCAGAGAAGAGGTAACTCCCTCTCCGAGGCAGGAGCAGAAAGAAGAGGGACAGTACCCTCCCTTAGCTTCCCTCAAATCACTCTTTGGCAACGACCCCTAGTCACAATAAAAATAGGGGGACAGCTAAAGGAAGCTCTATTAGATACAGGAGCAGATGATACAGTATTAGAAGACATAAATTTGCCAGGAAAATGGAAACCAAAAATGATAGGGGGAATTGGAGGTTTTATTAAAGTAAAACAGTATGATCACATACTCATAGAAATTTGTGGACATAAAGCCATAGGTACAGTGTTAGTAGGACCTACGCCTGTCAACATAGTTGGAAGAAATATGTTGACTCAAATTGGTTGTACTTTAAATTTTCCAATTAGTCCTATTGAAACTGTACCAGTAAAACTGAAACCAGGAATGGATGGCCCAAAGGTTAAACAATGGCCATTAACAGAAGAAAAAATAAAAGCATTAACAGAAATTTGTACAGAAATGGAAAAAGAAGGAAAAATTTCAAAAATTGGGCCTGAGAATCCATATAACACTCCAGTGTTTGCCATAAAGAAAAAAGACAGTACTAAATGGAGAAAATTAGTAGATTTTAGAGAACTCAATAAAAGAACTCAAGACTTCTGGGAAGTTCAATTAGGAATACCACATCCAGCAGGATTAAAAAAGAAAAAATCAGTAACAGTACTGGATGTGGGGGATGCATATTTTTCAGTTCCCTTAGATAAAGATTTCAGGAAGTACACTGCATTCACCATACCTAGTGTCAACAATGAGACACCAGGAATTAGGTACCAGTACAATGTGCTTCCACAAGGATGGAAAGGATCACCAGCAATATTCCAATGTAGCATGACAAAAATCTTAGAGCCCTTTAGAACAAGAAATCCAGACATAGTTATCTACCAATACATGGATGATTTGTATGTAGGGTCTGACTTAGAAATAGGGCAGCATAGAACAAAAATAGAGGAGTTAAGAGAACATCTACTGAAATGGGGATTTACTACACCAGACAAAAAACATCAGAAAGAACCTCCATTCCTCTGGATGGGGTATGAACTCCATCCTGATAAATGGACAGTGCAGCCTATACAATTGCCAGACAAGGACAGCTGGACTGTCGATGATATACAGAAATTAGTAGGAAAACTAAACTGGGCAAGTCANATTTATCCAGGGATTAAAGTAAGGCAATTATGTAAACTCCTTAGAGGAGCCAAGGCACTAACAGACATGGTGCCACTGACTGCAGAAGCAAATTTAGAATTGGCAGAAAATAGGGAGATTCTAAAAGAACCAGTACATGGGGTATATTATGACCCATCAAAAGACTTAATACCAAAATTACAGAAACAAGGGCAAGGACAATGGACATATCAAATTTACCGAGAGCCATTTAAAAATCTAAAAACAGGAAAGTATGCAAAAATGAGGTCTGCCCACACTAATGATGTAAAACAATTAACAGAAGCAGTGCAAAAGATAGCTCTAGAAAGCATAGTAATATGGGGAAAGACTCCTAAGTTTAAACTACCTATTCTAAAAGAGACATGGGATACATGGTGGACAGAGTATTGGCAAGCCACCTGGATTCCTGAGTGGGAGTTTGTCAATACCCCCCCTCTAGTAAAACTATGGTATCAATTAGAAACAGAGCCCATAGCAGGAGCAGAAACATTCTATGTGGATGGGGCATCTAATAGAGAGACCAAAAAAGGAAAAGCAGGATATGTTACTGATAGAGGAAGACAAAAGGTTGTCTCCCTAACTGAGACCACAAATCAGAAGGCTGAGTTACAAGCAATTCATTTAGCTTTACAGGATTCAGGATCAGAAGTGAACATAGTAACAGATTCACAATATGCATTAGGAATCATTCAAGCACAACCAGATAAGAGTGAATCAGAGTTAGTCAATCAAATAATAGAGCAGTTAATACAAAAGGAAAAGATCTACCTGTCATGGGTACCAGCACACAAAGGGATTGGAGGAAATGAACAAGTAGATAAATTAGTCAGTGCTGGAATCAGAAAAATACTGTTTTTAGATGGGATAGATAAGGCACAAGAGGAACATGAAAAATATCACAACAATTGGAGAGCAATGGCTAGTGATTTTAATCTGCCACCTGTAGTAGCAAAAGAAATAGTAGCTAGCTGTGATAAGTGTCAGCTAAAAGGGGAAGCCATGCATGGACAAGTAGACTGTAGTCCAGGGATATGGCAATTAGATTGTACACATTTAGAAGGAAAAATTATCCTGGTAGCAGTCCATGTAGCTAGTGGATACATAGAAGCAGAAGTTATCCCAGCAGAAACAGGACAGGACACAGCCTACTTCATACTAAAGTTAGCAGGAAGATGGCCAGTAAAAATGATACATACAGACAATGGCAGCAATTTCACCAGTGCCGCGGTTAAGGCAGCCTGTTGGTGGGCAGGTATCCAGCAGGAATTTGGAATTCCCTATAACCCCCAAAGTCAAGGAGTAGTAGAATCAATGAATAAAGAGCTAAAGAAGATCATAGGACAGGTAAGAGATCAAGCTGAACATCTTAAGACAGCAGTACAAATGGCAGTATTCATCCACAATTTTAAAAGAAAAGGGGGGATTGGGGGGTACAGTGCAGGGGAAAGAATAATAGACATAATAGCAACAGACATACAAACTAAAGAATTACAAAAACAAGTTACAAAAATTCAAAATTTCCGGGTTTATTACAGGGACAGCAGAGACCCAGTTTGGAAAGGACCAGCAAAGCTACTCTGGAAAGGTGAAGGGGCAGTAGTCATACAAGACAATAGTGAAATAAAAGTAGTGCCAAGAAGAAAAGCAAAGATCATTAGGGATTATGGAAAACAGATGGCAGGTGACGATTGTGTGGCAGGTAGACAGGATGAGGATTAACACATGGAAAAGTTTAGTAAAATACCATATGCATGTTTCAAAGAAAGCCAAAAGATGGTTTTATAGACATCACTTTGAAAGCAGACATCCAAAAATAAGTTCAGAAGTACACATCCCCCTAGAGGAAGCTGAATTAGTAATAACAACATATTGGGGGCTGAATACAGGAGAAAGAGATTGGCATCTGGGTCAAGGAGTCTCCATAGAATGGAGGCAGGGGAGGTATAGGACACAAATAGACCCTGGCCTGGCAGACCAACTGATCCATATATATTACTTTGATTGTTTTTCAGAATCTGCCATAAGGAAAGCCATATTAGGACATAGAATTAGCCCTAGGTGTGACTATCAAGCAGGACATAACAAGGTAGGATCCCTACAATATTTGGCACTAACAGCATTAGTATCTCCAAAGAAGGCAAAGCCGCCTTTGCCTAGTGTCAAGAAACTAGTAGAAGACAGATGGAACAAGCCCCAGGAGATCAGGGGCCACAGAGGGAGCCATACAATGAATGGGCACTAGAACTTTTAGAGGAGCTTAAGAACGAAGCTGTTAGACATTTTCCTAGGCCATTCCTCCATGGCATAGGACAATATATCTATAACACCTATGGGGATACTTGGGAGGGAGTTGAAGCCATAATAAAAATATTGCAGCAACTACTGTTTATCCATTTCAGAATTGGGTGCCATCATAGCAGAATAGGCATTATTCGACAGAGAAGAGTAAGAAATGGAGCTAGTAGATCCTAATTTAGATCCCTGGAACCATCCAGGAAGCCAGCCTCCAACTCCTTGTAACAAATGCTATTGTAAACGGTGTTGCTTTCATTGCTACTGGTGCTTTGCAACGAAGGGCTTAGGCATCTCCTATGGCAGGAAGAAGCGGAGACAGCGACACAGAACTCCTCAAAGCAGTCAAATACATCAAGATCCTGTACCAAAGCAGTAAGTATTGTTAAGTAGTGTATGTAATGTCAGATTTGTTAGCAATAACGATAGTAGCATTTATAGTAGCCCTAATAATAGTAATAGTTGTGTGGACCATAGTATTTATAGAATATAAGAAGCTAGTAAGGCAAAGAAAAATAAATAGGTTGTATATAAGAATAAGAGAAAGAGCAGAAGACAGTGGCAATGAGAGTGAGGGGGATGCAGAGGAATTGGCAGCACTTGGGAAAATGGGGCCTTTTATTCCTGGGGATGTTAATAATCTGTAAAGCTGCGGATGACTTGTGGGTCACAATCTATTATGGGGTACCTGTGTGGAAAGAAGCAAACACCACTTTATTCTGTGCATCAGATGCTAAATCATATGAAAAAGAAGTACATAATGTCTGGGCTACACATGCCTGTGTACCCACAGACCCCAATCCACAAGAAGTAGCTCTAAATGTGACAGAAAATTTTAATATGTGGGAAAATGACATGGTAGAACAAATGCATAAAGATATAATCAGTTTATGGGATCAAAGTCTAAAGCCATGTGTAAAGCTAACCCCACTCTGTGTTACTTTAAATTGTACTAATGCCACTACCACCAATGACACTCTCTCTGACCAAAGCAGTACCCTGAAGGAAGAACCAGGGGCAATACAAAACTGTTCTTTCAATATGACCACAGAAGTAGAAGATAAGAAGCAGAAAGTACATGCGCTTTTTTATAGACTTGATATAGAACCAATCAGCAATAATAATAGCAGGGAAGAATATAGGCTAATAACTTGTAATACCTCAACCATTACACAGGCTTGTCCAAAGGTATCTTGGGATCCAATTCCCATACATTATTGTGCTCCAGCTGGTTATGCGATTCTAAAGTGTAAGGATAAAAGGTTCAATGGGACGGGGCCATGTAGGAATGTCAGCACAGTACAATGTACACATGGAATTAGGCCAGTGGTATCAACTCAATTGTTGTTAAATGGCAGCCTATCAGAAGGAGGTATAATAATCAGATCTCAAAATCTCTCAGATAATGCAAAAACTATAATAGTACACCTTAATGAATCTGTACAGATCAATTGTACAAGACCCAACAACAATACAAGAAAAAGTATACGTATAGGACCAGGACAATCATTTTATGCAACAGGAGAAATAATAGGAGACATAAGAAAGGCACATTGTAACATTAGTGGAGAACAATGGAATAAAACTTTAGACCGAGTAAAGGCAGAGTTAAAGCTTCATTTTAATAAAACAATACAATTTAACTCATCCTCAGGAGGGGACCTAGAAATTACAATGCATAGTTTTAATTGTAGAGGAGAATTTTTCTACTGCAATACATCACTACTGTTTAATAATACAGTACCTAATAATGGCACTATCACTCTCCCATGTCGAATAAAACAATTTGTAAACATGTGGCAGGAAGTAGGACGAGCAATGTATGCCGCTCCCATTGCAGGAAACATTACCTGTAACTCAAATATTACAGGTCTGCTATTGACAAGAGATGGTGGTCAGAGTAATAATAGTGATTCTGAGACCTTCAGACCTGGGGGAGGAGATATGAAAGACAATTGGAGAAGTGAACTATATAAATATAAAGTAGTAGAAATTGAACCACTAGGAGTAGCACCCACCAGGCCCAAAAGACCAGTGGTGAGGAGAGAAAGAAGAGCAGTGGCAATAGGAGCTGTATTCCTTGGGTTCTTGAGCGCAGCAGGAAGCACTATGGGCGCGGCGTCACTAACGCTGACGGTACAGGCCAGACAATTATTGTCTGGAATAGTGCAACAGCAGAACAATCTGCTGCAGGCTATTGAAGCGCAACAGCATATGTTGCAGCTCACAGTCTGGGGCATTAAACAGCTCCAGGCAAGAGTCCTGGCTGTGGAAAGATACCTAAAGGATCAACAGCTCCTAGGGCTTTGGGGATGCTCTGGAAAACTCATCTGCACCACTAATGTGCCCTGGAACTCTAGTTGGAGTAATAAATCTCAGGATGAGATTTGGAATAACATGACCTGGATGCAGTGGGAAAAAGAGATTAGCAATTACTCAAAAACAATATACATGTTAATTGAAAAATCGCAGAGCCAGCAGGAACGGAATGAACAAGAATTGTTGGAATTGGACAAGTGGGATAGTCTGTGGAGTTGGTTTGATATAACAAACTGGTTATGGTATATAAAAATATTCATAATGATAGTAGGAGGCTTGATAGGCTTAAGAATAGTTTTTGCTGTGCTTTCTATAGTAAATAGAGTTAGGAAGGGATACTCACCTTTGTCATTACAGACCCTTATCCCAGCCCCGACGGAACCCGACAGGCCCGAAGGAATCGAAGAAGGAGGTGGAGAGCAAGGCAAAGACAGATCCGTGCGATTAGTGAACGGATTCTTAGCTCTTGTCTGGGACGACTTGAGGAACCTGTGCCTCTTCAGCTACCGCCACTTGAGAGACTTCATATTAATTGCAGCGAGGATTGTGGACAGGGGACTGAGGAGGGGGTGGGAAGCCCTCAAATATCTGGGGAACATCATACAGTATTGGAGTCAGGAACTAAAGAATAGTGCTATTAGCTTGTTTAATACCACAGCAATAGTAGTAGCTGAGGGGACAGATAGAGTTATAGAAGCTTTGCAAAGAGCTGTTAGAGCTGTTCTCAACATACCTAGAAGAATAAGACAGAGAGTAGAAAGGGCTTTGATATAAAATGGGTGGCAAGTGGTCAAAAAGTAGTATAGTTGGATGGCCTGCTATAAGGGAAAGAATGAGACGACCCCCTCCAGCAGCAGCAGAAGGGGTGGGAGCAGTGTCTCAAGACTTAGAAAGACGGGGGGCAATTACAAGCAGCAATACTGGAGCTACTAATCCTGACTTGGCCTGGCTGGAAGCACAAGAGGACGAGGAAGTAGGCTTTCCAGTCAGACCCCAGGTACCTTTAAGACCAATGACTTATAAGGGAGCTTTTGATCTCAGTCAGTTTCNANAAGAAAAGGGGGGACTGGAAGGGTTAWTTTACTCCAAGAAAAGACAAGAGATCCTTGATCTGTGGCTTTACCACACACAAGGCTACTTCCCCTGATTGGCAGAACTACACACCAGGGCCGGGGGGTCAGATATCCCCTGACCTTTGGGTGGTGCTTCAAGCTAGTACCAGTTGAGCCAGAGGAGGTAGAAAAGGCCAATGAAGGAGAGAACAACTGCTTGCTACACCCCATGAGCCAACATGGAATGGAGGATGAAGACAGAGAAGTACTGAAATGGAAGTTTGACAGCCGCCTGGCACTGAAACACATAGCCAGAGAGAGACATCCGGAGTTCTACCGAGACTGAGATTGCTGACACAGAGATTGCTGACACAGAAGAATCTAAGGGACTTTCCACTGGGGACTTTCCAGAGGGCGGTCCAGAGGGCGGGACTGGGGAGTGGCTCACCCTCAGATGCTGCATATAAGCAGCCGCTTTTCGCTTGTACAGGGTCTCTCTGGTTAGACCAGATTTGAGCCTGGGAGCTCTCTGGCTAGCTGAGAACCCGCTGCTTAA
>F2.CM.95.MP255_AJ249236_G.SE.93.SE6165_AF061642
ATGGGTGCGAGAGCGTCAGTATTAAGCGGGGGAAAATTAGATGCATGGGAAAAAATTCGGTTAAAGCCGGGGGGAAAGAAAAGATATAGGCTAAAACATCTAGTATGGGCAAGCAGGGAACTAGAACGATTTGCACTTAATCCTAGCCTTTTAGAAACAACAGAAGGCTGTAAGAAAATAATAGGACAATTACAATCATCCCTTCAGACAGGATCAGAAGAGCTTAAATCACTATACAATGCAGTAGTAGTTCTCTATTATGTACATCAAAGGATAGATGTAAGAGACACCAAGGAAGCTTTAGATAAGCTACAGGAAGAACAAGATAAAAGTCAGCAAAAGGAACAACAAAAGGCGGCTGACAAAGAGGTCAGTCAAAATTACCCTATAGTGCAGAATATTCAGGGGCAAATGGTACACCAGGCTCTATCACCTAGAACTTTAAATGCATGGGTAAAAGTAATAGAAGAGAAGGCTTTCAGTCCAGAAGTAATACCCATGTTTTCAGCATTATCAGAAGGGGCCACCCCACAAGATTTAAATACCATGCTAAACACAGTGGGGGGACATCAAGCAGCCATGCAAATGTTAAAAGATACTATCAATGAGGAGGCTGCAGAATGGGACAGGTTACATCCAGTGCATGCAGGGCCTATCCCACCAGGGCAGATGAGAGAACCTAGGGGAAGTGATATAGCAGGAACTACTAGTACCCTTCAGGAACAAATAACATGGATGACAGGCAACCCACCCGTCCCAGTAGGAGAAATCTATAAAAGATGGATAATCCTAGGATTAAATAAAATAGTAAGAATGTATAGCCCTGTCAGCATTTTGGACATAAAACAAGGGCCAAAAGAACCCTTTAGAGACTATGTAGACAGGTTCTTTAAAACTCTAAGAGCTGAACAAGCTACACAGGAGGTAAAAAACTGGATGACAGAAACCTTGTTGGTCCAAAATTCGAACCCAGATTGTAAGACAATTTTAAAAGCATTGGGACCAGGGGCTACACTAGAAGAAATGATGACAGCATGTCAGGGAGTGGGAGGACCTGGCCATAAAGCAAGAATTCTGGCTGAGGCAATGAGCAAAGCAACAAGTACAGCCATAATGATGCAGAAAAGCAACTTTAAGGGCCAAAAAAGAATTGTTAAGTGTTTCAACTGTGGCAAAGAAGGACATATAGCTAGAAATTGCAGGGCCCCTAGAAAAAAGGGCTGTTGGAAATGTGGAAAGGAAGGACACCAAATGAAAGACTGCACTGAAAGGCAGGCTAATTTTTTAGGGAAAATTTGGCCTTCCAACAGGGGGAGGCCAGGAAATTTTCTTCAGAACAGACCAGAGCCAACAGCCCCGCCAGCAGAGAACTTCGGGTTCGGAGAGGGGATAACCCCCTCCCCGAAGCAGGAGCAGAAAGGCGAGGAACAGGCTCCTCCCTTAGTTTCCCTCAAATCACTCTTTGGCAGCGACCCTTAGTCGCAATAAGAGTAGGGGGGCAACTAAGGGAGGCTTTATTAGATACAGGGGCAGATGATACAGTATTAGAAGACATAAATTTACCAGGGAAATGGAAACCAAAAATGATAGGGGGAATTGGAGGTTTTATTAAAGTAAGACAGTATGATCAAATACCCATAGAAATTTGTGGACAAAAGGCTATAGGTACAGTATTAGTGGGACCTACGCCTGTCAACATAATTGGAAGAAATCTGTTGACTCAGCTTGGTTGCACTTTAAATTTTCCAATTAGTCCTATTGAAACAGTACCAGTAAAATTAAAGCCAGGAATGGATGGCCCAAGGGTTAAACAATGGCCATTGACAGAAGAAAAAATAAAAGCATTAACAGAAATCTGTACAGAGATGGAAAAAGAAGGAAAAATTTCAAAAATTGGGCCAGAAAATCCATACAATACTCCAGTATTTGCCATAAAGAAAAAGGACAGTACTAAATGGAGAAAATTAGTAGATTTCAGAGAACTTAATAAAAGAACTCAAGATTTTTGGGAGGTTCAATTAGGAATACCACACCCTGCAGGGTTAAAAAAGAAAAAATCAGTAACAGTACTGGATGTGGGGGATGCATATTTTTCAGTTCCCTTAGATAAGGAGTTCAGGAAATACACTGCGTTCACCATACCTAGTATCAACAATGAGACACCAGGAATTAGATATCAGTACAATGTGCTTCCACAGGGATGGAAAGGGTCACCAGCAATATTCCAATGTAGCATGACAAAAATCTTAGAGCCCTTTAGAGCAAAAAATCCAGAAATAGTTATCTACCAATACATGGATGATTTGTATGTAGGGTCTGACTTAGAAATAGGGCAGCATAGGACAAAAATAGAGGAGTTAAGAGAACATCTATTGAAATGGGGATTTACTACACCAGATAAAAAACATCAGAAAGAACCCCCATTTCTTTGGATGGGGTATGAACTCCATCCTGACAAATGGACAGTACAGCCTATACAATTGCCAGAAAAGAGCAGCTGGACTGTCAATGATATACAGAAGTTAGTAGGAAAACTAAATTGGGCAAGTCAGATTTATCCAGGGATTAGAATAAAACACTTATGTAGACTCCTTAGGGGAGCCAAAGCACTAACAGATGTAGTGCCACTGACTGCAGAAGCGGAGTTAGAATTGGCAGAGAACAGGGAGATTATAAAAGAACCAGTACATGGGGTATATTATGACCCATCAAAGGATTTAATAGCAGAAATACAGAAACAAGGGCATGATCAATGGACATATCAAATTTATCAAGAACCATATAAAAATTTGAAAACAGGAAAATATGCAAAAAGGAAGTCTGCCCACACTAATGATGTAAAACAATTAACAGAAGTAGTACAAAAAATAGCCACAGAAAGCATAGTGATATGGGGAAAGATTCCTAAATTTAGACTACCCATACAAAAGGAAACATGGGAAATATGGTGGACAGAGTATTGGCAGGCCACCTGGATTCCTGAATGGGAGTTTGTCAATACCCCTCCTCTAGTAAAATTATGGTACCAGTTAGAAACAGAACCCATAGCAGGAGCAGAAACTTTCTATGTAGATGGGGCAGCTAATAGAGAGACTAAACTAGGAAAAGCAGGATATGTTACTGACAGAGGAAGACAAAAAGTTGTCCCCCTAACCGAGACAACAAATCAGAAGACTGAATTACAAGCAATTCACTTAGCTTTGCAGGACTCAGGATCAGAAGTAAACATAGTAACAGACTCACAGTATGCATTAGGAATCATTCAAGCACAGCCTGATAAAAGTGAGTCAGAGTTAGTCAACCAAATAATAGAGCAATTAATACAAAAGGAAAAGGTCTACCTGTCATGGGTACCAGCACATAAAGGGATTGGAGGAAATGAACAAGTAGATAAATTAGTCAGTAGTGGAATCAGGAAAGTACTGTTTTTAGATGGGATAGATAAGGCTCAAGAAGAACATGAAAAATATCACAACAATTGGAGAGCAATGGCTAGTGATTTTAATCTGCCACCTGTAGTAGCAAAAGAGATAGTAGCCAACTGTGATAAATGTCAGCTAAAAGGGGAAGCCATGCATGGACAAGTAGACTGTAGTCCAGGAATATGGCAATTAGATTGTACACATTTAGAAGGAAAAATTATCATAGTAGCAGTTCATGTAGCCAGTGGCTATATAGAAGCAGAAGTTATTCCAGCAGAAACAGGACAGGAAACAGCATACTTTATATTAAAATTAGCAGGAAGGTGGCCAGTAACAGTAATACATACAGATAATGGCAGCAATTTCACCAGTGCTGCAGTAAAGGCAGCATGTTGGTGGGCAAATATCACACAGGAATTTGGAGTTCCCTACAATCCCCAAAGTCAAGGAGTAGTAGAATCTATGAATAAAGAATTAAAGAAAATCATAGGACAGATAAGAGATCAAGCTGAACATCTTAAGACAGCAGTGCAAATGGCAGTATTCATTCACAATTTTAAAAGAAAAGGGGGGATTGGGGGGTACAGTGCAGGGGAAAGAATAATAGACATAATAGCAACAGATATACAAACTAAAGAATTACAAAAACAAATTACAAAAATTCAAAATTTTCGGGTTTATTTCAGGGACAGCAGAGACCCAGTTTGGAAAGGACCAGCAAAGCTACTCTGGAAAGGTGAAGGGGCAGTAGTCATACAAGACAATAATGAAATAAAAGTAGTACCAAGAAGAAAAGCAAAGATCATTAGGGATTATGGAAAACAGATGGCAGGTGATGATTGTGTGGCAGGTAGACAGGATGAGGATTAGAACATGGAACAGCTTGGTAAAACACCATATGTATGTTTCAAGGAGAGCTAAAGGATGGTTTTATAGACATCACTATGAAAGCAGGCATCCAAAAGTAAGTTCAGAAGTACACATCCCATTAGAGGATGATTCTAAATTAGTAATAATAACCTATTGGGGTCTACATACAGGAGAAAGAGATTGGCATTTGGGTCACGGAGTCTCCATAGAATGGAGGCAGAAAAGGTATAGGACACAAGTAGACCCTGACTTGGCAGACCAACTAATTCATCTGCGTTATTTTGATTGTTTTTCAGAATCTGCCATAAGGAATGCCATATTAGGACATAGAGTTAGTCCTAGGTGTAATTATCAAGCAGGACACAACAAGGTAGGATCCCTACAATATTTGGCATTGACAGCATTAATAACCCCAAAAAAGATAAAGCCACCTTTGCCTAGTGTCAGGAAACTAGTAGAGGATAGATGGAACAACCCCCAGAAGACCAAGGGCCACAGAGGGAGCCATACAATGAATGGACACTAGAGCTTTTAGAGGAGCTTAAGAATGAAGCTGTTAGACATTTCCCTAGGGAATATCTCCATGGCTTAGGACAGTATATCTATAACACCTATGGAGATACTTGGAGGGGAGTTGAAACTATGATAAGGATACTGCAACAACTACTATTTATCCATTTCAGAATTGGGTGCCATCATAGCAGAATAGGCATTATTCGACAAAGAAGACTAAGAAATGGAAGTAGTAGATCCTAAAATAGATCCCTGGAACCATCCAGGAAGTCAGCCTGAGACTCCTTGTAATAACTGCTATTGTAAAAAATGTTGCTTTCACTGCCCATTGTGCTTTATGAAGAAGGGCTTAGGCATCTCCTATGGCAGGAAGAAGCGGAGACAGCGACGAAGAACTCCTCAAGGCAGTAAGATACATCAAGATCCTGTACCAAAGCAGTAAGTAGTATATGTAATGCCATCTTTGCTAGCAGTAGGAATATCAGCACTTATAGTAGCACTAATAATAACAATAATTGTGTGGACTATAGTATATTTAGAATATAAGAAACTGTTAAGGCAAAAAAGAATAAATAGGTTATATGAAAGAATAAGAGAAAGAGCAGAAGACAGTGGCAATGAGAGTGAGGGAGATGCAGAGGAATTGGCAGCACTTGGGGAAGTGGGGCCTTTTATTCCTGGGGATATTAATAATCTGTAATGCTAATGCTACAGATGACTTGTGGGTCACAGTCTATTATGGAGTACCTGTGTGGAAGGAACCAACCACTACTCTGTTTTGTGCATCAGATGCTAAAGCATATGACCCAGAAGTACATAATGTCTGGGCTACATATGCCTGTGTACCTACAGACCCCAACCCACAAGAATTGGTTTTGGGAAATGTAACAGAAAACTTTAATATGTGGGAAAATAACATGGTAGATCAGATGCATCTAGATATAATCAGTTTATGGGATCAAAGCTTAAAACCATGTGTAAAGTCAACCCCACTCTGTGTTACTTTAAACTGTACTGATGTTAATATCACCATGAGTGACATTAATGGCACCAGCCTGAAGGAAGATCAAGGGGAAATAAAAAATTGTTCTTTCAATGTAACCACAGAGCTGAAAGATAAGAAGAGGAAACAACAGGCACTTTTTTACAGACTTGATGTAGAACCAATTAAGAATAGTAGTAATATATATAAGCTAATAAGTTGTAATATGTCAACTGTTACACAGGCTTGTCCAAAGGTATCCTTTGATCCAATTCCTATACATTATTGTGCCCCTGCTGGTTATGCGATTCTAAAGTGTAATGATAAAAGGTTCAATGGGACAGGGCCATGCGAAAAGGTCAGCACAGTACAATGTACACATGGAATTAGACCAGTGGTATCAACTCAACTACTGCTAAATGGCAGCCTAGCACAAGAAGATATAATAATTAGATCTAAAAATATCACAGATAATACAAAAAACATAATAGTACAGTTTAATAGATCTGTAATAATTGATTGTAGAAGACCCAACAACAATACAAGAAAAGGGATACGTATAGGACCAGGACAAACATTCTTTGCAACAGGTGAAATAATAGGGGATATAAGAAAGGCATATTGTAACATTAATAGAACACTGTGGAATGAAACTTTAAAAAATGTAAGTGGAGAGTTCAAAAAACACTTCAACTTCTCAGTAGCCTTTAATTCATCCTCAGGAGGGGATGTAGAAATTACAACGCATAGTTTTAATTGTAGAGGAGAATTTTTCTACTACAACACATCAGGACTGTTTAATGAAACAGAGGTGGCTAATAACACAAACGAAAATATCACTCTCCCATGTAGAATAAGACAATTTGTAAACATGTGGCAAAGAATAGGAAGAGCAATGTATGCTCCTCCCATTGAAGGAGAAATCCAGTGTACCTCAAATATCACAGGTCTACTATTGACAAGAGATGGTAGTAAGGATATTGACGGGAAAGAGATTCTCAGACCTATAGGAGGAGATATGAGAGACAATTGGAGAAGTGAACTATATAAATATAAGGTAGTAAGAATTGAACCAGTAGGAGTAGCACCCACCAAGGCAAAAAGACGAGTGGTGCAGAGAGCAAAAAGAGCAGTGGGAATGGGAGCTGTGCTCTTTGGGTTCTTGGGAGCAGCAGGAAGCACTATGGGCGCGGCGGCAATCACGCTGACGGCACAGGCCAGACAATTATTGTCTGGTATAGTGCAACAGCAAAGCAATCTGCTGAAGGCTATAGAAGCGCAACAGCATCTGTTGCAGCTCACAGTCTGGGGCATTAAACAGCTTCAGGCGAGAATCCTGGCTGTGGAAAGATACCTAAAAGACCAACAGCTCCTAGGGATTTGGGGATGCTCTGGAAAACTCATCTGCACCACTAATGTACGCTGGAACTCTAGTTGGAGTAATAAATCTTATGATGACATTTGGGACAATATGACCTGGATGCAGTGGGAAAAAGAGATTGACAATTACACAAAAACAATATACAGCTTAATTGAAGATGCGCAGAACCAGCAGGAAAGGAATGAACAGGAATTATTGGCATTAGATAAATGGGACAGTCTGTGGAGTTGGTTTTCTATAACAAACTGGTTGTGGTACATAAAAATATTCATAATGATAGTAGGAGGCTTGATAGGATTAAGAATAGTTTTTGCTGTGCTTTCTGTAGTAAATAGAGTTAGGCAGGGATACTCACCTTTGTCATTACAGACCCTTATCCCAAACCCGAGGGGACCCGACAGGCCCGGAGGAATCGAAGAAGAAGGTGGAGAGCCAGACAGAGACAGATCCATGAGATTAGTGAGCGGATTCTTACCACTTACCTGGGACGACCTACGGAGCCTGTGCTCTTTCAGCTACCGCCACTTGAGAGACTTACTATTAATTGCAGCGAGGACTGTGGACAGGGGAGTGAAAGGGGGGTGGGAAGCCCTCAAATATCTGTGGAATCTCACGCAGCATTGGGGTCGGGAATTAAAGAATAGTGCTATTAGTCTATTTGATACCATAGCAATAGCAGTAGCTGAAGGGACAGATAGAATCATAGAAGTTTTGCAAAGAGCTGGTAGAGCTGTCCTCCACATACCTAGAAGAATAAGACAGGGTGCTGAAAGGTTTTTGCTATAAGATGGGTGGCAAGTGGTCAAAAAGTAGTATAGTTGGATGGCCTAATGTAAGGGAAAGAATGAGAGCAGCAGAAGGGGTGGGGAAAGTGTCACAAGACTTAGACAAACATGGGGCAATTACAAGCAGCAATACCAGGGCAACTAATGCTGACTTGGCCTGGCTGGAAGCACAAGAGGAAGAAGTAGGTTTTCCAGTCAGACCTCAGGTACCTTTAAGGCCAATGACTTATAAGGCAGCTGTCGATCTCAGTCACTTTTTAAAAGAAAAGGGGGGACTGGAAGGGTTAATTTACTCCAAGAAAAGACAAGAGATCCTTGATCTGTGGGTCTACCACACACAAGGTTACTTCCCTGATTGGCAGAACTACACACCAGGGCCAGGGATCAGATATCCACTGACCCTTGGATGGTGCTTCAAGCTAGTACCAGTTGATCCAGAGGAGATAGAAAAGGCCAATGAAGGAGAGAACAACTGCTTGTTACACCCTATAAGCCTACATGGAATGGAGGATGAAGACAGAGAAGTGTTAAGATGGAAGTTTGACAGCAGCCTAGCACTGAGACACGTAGCCAGAGAGAGACATCCGGAGTTTTACCAAGAC
>F2.CM.95.MP257_AJ249237_H.BE.93.VI997_AF190128
[truncated: 78,911 more chars]
