# Supplementary material for: More accurate recombination prediction in HIV-1 using a robust decoding algorithm for HMMs
Source: BMC Bioinformatics. 2011 May 17;12:168. doi: 10.1186/1471-2105-12-168 (PMC3123234; doi:10.1186/1471-2105-12-168)
Supplement: Additional file 1 — Data sets. This file contains sequences and their annotations for the single-breakpoint and short interval data sets. [file 1471-2105-12-168-S1.GZ › datasets/short_250_annotations.txt]

>A1.TZ.01.A173_AY253305_A2.CD.97.97CDKTB48_AF286238
1	2590	A1
2591	2840	A2
2841	8766	A1

>A1.UG.99.99UGA07072_AF484478_B.CA.97.CANB3FULL_AY779553
1	6166	A1
6167	6416	B
6417	8824	A1

>A1.KE.00.MSA4076_AF457084_C.ZA.03.03ZASK076B1_AY901975
1	1581	A1
1582	1831	C
1832	8819	A1

>A1.SE.94.SE7253_AF069670_D.CD.83.ELI_A07108
1	6331	A1
6332	6581	D
6582	8813	A1

>A1.RU.03.03RU20_06_13_AY500393_F1.FR.96.MP411_AJ249238
1	1636	A1
1637	1886	F1
1887	9165	A1

>A1.BY.97.97BL006_AF193275_F2.CM.97.CM53657_AF377956
1	2669	A1
2670	2919	F2
2920	9037	A1

>A1.UG.99.99UGA07072_AF484478_G.SE.93.SE6165_AF061642
1	3025	A1
3026	3275	G
3276	8824	A1

>A1.UZ.02.02UZ652_AY829203_H.BE.93.VI997_AF190128
1	3899	A1
3900	4149	H
4150	8825	A1

>A1.KE.00.KSM4030_AF457079_J.SE.93.SE7887_AF082394
1	3474	A1
3475	3724	J
3725	8771	A1

>A1.KE.94.Q23_17_AF004885_K.CM.96.MP535_AJ249239
1	4228	A1
4229	4478	K
4479	9160	A1

>A2.CD.97.97CDKTB48_AF286238_B.US.86.YU_2_M93258
1	6130	A2
6131	6380	B
6381	8972	A2

>A2.CD.97.97CDKFE4_AF286240_C.ZA.03.03ZASK072B1_DQ093593
1	2590	A2
2591	2840	C
2841	5100	A2

>A2.CY.94.94CY017_41_AF286237_D.UG.99.99UGB25647_AF484481
1	1471	A2
1472	1721	D
1722	9057	A2

>A2.CY.94.94CY017_41_AF286237_F1.BE.93.VI850_AF077336
1	521	A2
522	771	F1
772	9054	A2

>A2.CD.97.97CDKS10_AF286241_F2.CM.95.MP255_AJ249236
1	1153	A2
1154	1403	F2
1404	5326	A2

>A2.CD.97.97CDKTB48_AF286238_G.ES.00.X558_AF423760
1	3017	A2
3018	3267	G
3268	8972	A2

>A2.CD.97.97CDKS10_AF286241_H.CF.90.056_AF005496
1	937	A2
938	1187	H
1188	5323	A2

>A2.CD.97.97CDKS10_AF286241_J.SE.93.SE7887_AF082394
1	3487	A2
3488	3737	J
3738	5332	A2

>A2.CY.94.94CY017_41_AF286237_K.CM.96.MP535_AJ249239
1	7774	A2
7775	8024	K
8025	9039	A2

>B.BR.99.BREPM11932_DQ085870_C.SN.90.90SE_364_AY713416
1	3027	B
3028	3277	C
3278	8414	B

>B.ES.89.S61K15_AF256210_D.ZA.85.R286_AY773340
1	4264	B
4265	4514	D
4515	9039	B

>B.AU.86.MBC200_AF042100_F1.FR.96.MP411_AJ249238
1	6504	B
6505	6754	F1
6755	9755	B

>B.US.89.P896_U39362_F2.CM.95.MP257_AJ249237
1	1889	B
1890	2139	F2
2140	9710	B

>B.ES.89.S61K15_AF256210_G.CM.96.96CMABB55_AY772535
1	3145	B
3146	3395	G
3396	9039	B

>B.KR.97.WK_AF224507_H.CF.90.056_AF005496
1	6226	B
6227	6476	H
6477	9244	B

>B.AU.x.8634991_AY857144_J.SE.94.SE7022_AF082395
1	2808	B
2809	3058	J
3059	8250	B

>B.US.x.AC_59_111_Days_Seq1_fa_DQ127550_K.CM.96.MP535_AJ249239
1	5018	B
5019	5268	K
5269	8242	B

>C.ZA.04.SK143B1_AY703910_D.ZA.86.R482_AY773341
1	497	C
498	747	D
748	9074	C

>C.ZA.04.04ZASK173B1_DQ093604_F1.FI.93.FIN9363_AF075703
1	2487	C
2488	2737	F1
2738	8403	C

>C.IL.99.99ET7_AY255824_F2.CM.97.CM53657_AF377956
1	2358	C
2359	2608	F2
2609	8793	C

>C.ZA.03.SK040B1_AY703908_G.ES.00.X558_AF423760
1	588	C
589	838	G
839	9029	C

>C.ZA.04.SK143B1_AY703910_H.CF.90.056_AF005496
1	7008	C
7009	7258	H
7259	9068	C

>C.ZA.04.04ZAPS217B1_DQ164119_J.SE.94.SE7022_AF082395
1	1976	C
1977	2226	J
2227	8436	C

>C.ZA.04.04ZASK164B1_DQ056405_K.CD.97.EQTB11C_AJ249235
1	6350	C
6351	6600	K
6601	8455	C

>D.UG.99.99UGA03349_AF484518_F1.BE.93.VI850_AF077336
1	7119	D
7120	7369	F1
7370	8793	D

>D.KR.04.04KBH8_DQ054367_F2.CM.02.02CM_0016BBY_AY371158
1	7731	D
7732	7981	F2
7982	8885	D

>D.UG.98.98UG57146_AF484513_G.NG.01.PL0567_DQ168573
1	5139	D
5140	5389	G
5390	8778	D

>D.CM.01.01CM_4412HAL_AY371157_H.BE.93.VI991_AF190127
1	1408	D
1409	1658	H
1659	8370	D

>D.TZ.01.A280_AY253311_J.SE.94.SE7022_AF082395
1	7941	D
7942	8191	J
8192	8766	D

>D.CM.01.01CM_4412HAL_AY371157_K.CM.96.MP535_AJ249239
1	4583	D
4584	4833	K
4834	8379	D

>F1.FR.96.MP411_AJ249238_F2.CM.95.MP255_AJ249236
1	2852	F1
2853	3102	F2
3103	8614	F1

>F1.FI.93.FIN9363_AF075703_G.NG.01.01NGPL0674_DQ168575
1	1608	F1
1609	1858	G
1859	8925	F1

>F1.BR.93.93BR020_1_AF005494_H.BE.93.VI991_AF190127
1	6776	F1
6777	7026	H
7027	8965	F1

>F1.FI.93.FIN9363_AF075703_J.SE.94.SE7022_AF082395
1	6648	F1
6649	6898	J
6899	8958	F1

>F1.FI.93.FIN9363_AF075703_K.CM.96.MP535_AJ249239
1	1952	F1
1953	2202	K
2203	8925	F1

>F2.CM.95.MP255_AJ249236_G.SE.93.SE6165_AF061642
1	3589	F2
3590	3839	G
3840	8555	F2

>F2.CM.95.MP257_AJ249237_H.BE.93.VI997_AF190128
1	3844	F2
3845	4094	H
4095	8589	F2

>F2.CM.97.CM53657_AF377956_J.SE.94.SE7022_AF082395
1	2690	F2
2691	2940	J
2941	8782	F2

>F2.CM.95.MP257_AJ249237_K.CD.97.EQTB11C_AJ249235
1	7642	F2
7643	7892	K
7893	8589	F2

>G.ES.99.X138_AF450098_H.CF.90.056_AF005496
1	1706	G
1707	1956	H
1957	8978	G

>G.NG.01.01NGPL0760_DQ168579_J.SE.94.SE7022_AF082395
1	354	G
355	604	J
605	8285	G

>G.NG.01.01NGPL0669_DQ168576_K.CM.96.MP535_AJ249239
1	1427	G
1428	1677	K
1678	8216	G

>H.BE.93.VI991_AF190127_J.SE.93.SE7887_AF082394
1	3830	H
3831	4080	J
4081	9056	H

>H.BE.93.VI991_AF190127_K.CD.97.EQTB11C_AJ249235
1	5686	H
5687	5936	K
5937	9056	H

>J.SE.93.SE7887_AF082394_K.CM.96.MP535_AJ249239
1	6069	J
6070	6319	K
6320	8955	J
