# Supplementary material for: More accurate recombination prediction in HIV-1 using a robust decoding algorithm for HMMs
Source: BMC Bioinformatics. 2011 May 17;12:168. doi: 10.1186/1471-2105-12-168 (PMC3123234; doi:10.1186/1471-2105-12-168)
Supplement: Additional file 1 — Data sets. This file contains sequences and their annotations for the single-breakpoint and short interval data sets. [file 1471-2105-12-168-S1.GZ › datasets/single_breakpoint.fas]

>A1.KE.00.KNH1209.AF457069_A2.CD.97.97CDKTB48.AF286238
GCGAGAGCGTCAGTATTAAGCGGGGGAAAATTAGATGCATGGGAGAAGATTCGGTTAAGGCCAGGGGGAAAGAAAAAATACAGAATGAAACATTTAGTATGGGCAAGCAGGGAGCTGGAAAGATTTGCACTTAACCCGGGCCTTTTAGAAACAGCAGAAGGATGTCAACAAATATTGGAACAATTACAATCAGCTCTCGGGACAGGAACAGAGGAACTTAAATCATTGTATAATACAGTAGCCACCCTCTATTGCGTACATCAAAGAATAGAGGTAAAAGACACCAAGGAAGCTCTAGATAAAATAGAGGAACTACAAAATAAGAGCAAGCAAAAGATACAACAGGCAGCAGCAGCTACAGGAAGCAGCAGCAAGGTTAGCCAAAATTACCCTATAGTGCAAAATGCACAAGGGCAAATGATACACCAGTCCTTGTCACCTAGGACTTTGAATGCATGGGTAAAAGTAATAGAAGAAAAGGCTTTCAGCCCAGAAGTAATACCCATGTTCTCAGCATTATCAGAGGGAGCCACCCCACAAGATTTAAATATGATGCTGAATATAGTGGGGGGACACCAGGCAGCGATGCAAATGTTAAAAGATACCATCAATGAGGAAGCTGCAGAATGGGACAGGTTACATCCAGTACATGCAGGGCCTATTCCACCAGGCCAGATGAGAGAACCAAGGGGAAGTGACATAGCAGGAACTACTAGTACCCCTCAAGAACAGATAGGGTGGATGACAAGCAACCCACCTATTCCAGTGGGAGACATCTATAAAAGATGGATAATCCTGGGATTAAATAAAATAGTAAGAATGTATAGCCCTGTTAGCATTTTAGATATAAAACAAGGACCAAAAGAACCCTTCAGAGATTATGTAGATAGGTTCTTTAAAACTCTCAGAGCTGAGCAAGCTACACAGGAGGTAAAAAATTGGATGACAGACACATTGCTGGTCCAAAATGCAAATCCAGATTGCAAGTCCATTTTAAGAGCATTAGGACCAGGAGCTACATTAGAGGAAATGATGACAGCATGCCAGGGAGTGGGAGGACCCAGCCATAAAGCAAGGGTTTTGGCTGAGGCAATGAGTCAGGCACAAAATACAAACATAATGATGCAGAGAGGCAATTTTAGGGGCCAGAAAAGAATTAAGTGCTTCAATTGTGGCAAAGAAGGACACCTAGCCAGAAATTGCAGGGCCCCTAGGAAAAAGGGCTGTTGGAAATGTGGGAAAGAGGGACATCAAATGAAAGACTGCACTGAAAGACAGGCTAATTTTTTAGGGAGAATCTGGCCTTCCAGCAAGGGGAGGCCAGGGAATTTTCCTCAGAACAGACTAGAGCCAACAGCCCCACCAGCAGAGATCTGTGGGATAGGGGAAGAGATAGCCTCCCCTCTGAAGCAGGAGCAGAGAGACAGGGAACAGACTCCAACTTTAATTTCCCTCAAATCACTCTTTGGCAACGACCCATTGTCACAGTAAGAATAGGGGGACAACTAAAAGAAGCTCTATTAGATACAGGAGCAGATGATACAGTATTAGAAGACATAGATTTGCCAGGAAAATGGAAACCAAAAATGATAGGGGGAATTGGAGGTTTCATCAAAGTAAAACAGTATGATCAGATACTTATAGAAATTTGTGGAAAAAGGGCTATAGGCACAGTATTAGTAGGACCTACACCTGTCAACATAATTGGCAGAAACATGTTGACCCAGATTGGTTGTACTTTAAATTTCCCAATTAGTCCTATTGAGACTGTGCCAGTAGAATTAAAGCCAGGAATGGATGGCCCAAAGGTTAAACAATGGCCATTGACAGAAGAAAAAATAAAAGCATTAACAGAAATTTGTACAGAAATGGAAAAGGAAGGAAAAATTTCAAGAATAGGGCCTGAAAATCCATACAATACTCCAATATTTGCAATAAAGAAAAAAGACAGCACTAAATGGAGGAAATTAGTGGATTTCAGAGAGCTCAATAAAAGAACACAAGACTTTTGGGAAGTTCAATTAGGAATACCGCATCCAGCGGGTCTAAAAAAGAAGAAATCAGTAACAGTACTAGATGTGGGGGATGCATACTTTTCAGTTCCTTTACATAAAAGTTTTAGAAAATATACTGCATTCACCATACCTAGTACAAACAATGAGACACCAGGAATCAGATATCAATACAATGTGCTTCCACAGGGATGGAAAGGATCACCAGCAATATTCCAGAGTAGCATGATAAAAATCTTAGAGCCTTTTAGATCAAAAAATCCAGAAATAATTATCTATCAATACATGGATGACTTGTATGTAGGATCTGATTTGGAAATAGGACAGCATAGAGCAAAAATAGAAGAGTTGAGAGCTCATCTATTGAGCTGGGGATTTACTACACCAGACAAAAAGCATCAGAAAGAACCTCCATTCCTTTGGATGGGATATGAGCTCCATCCTGACAAGTGGACAGTCCAGCCTATACAGTTGCCAGAAAAAGAAAGCTGGACTGTCAATGATATACAGAAATTAGTGGGGAAACTAAATTGGGCAAGTCAAATTTATGCAGGGATTAGAATAAAGCAATTGTGTAAACTCCTCAGGGGAGCCAAAGCTTTAACAGATATAGTAACATTGACTGAGGAAGCAGAACTAGAATTGGCAGAAAACAGGGAAATTCTAAAAAACCCTGTGCATGGGGTATATTATGACCCATCAAAAGACTTAGTAGCAGAAATACAGAAACAAGGGCAAGAACAATGGACATACCAAATTTATCAAGAGCCATTTAAAAATTTAAAAACAGGAAAATATGCAAGAAAAAGATCTACTCACACTAATGATGTAAAGCAATTAGCAGAAGTGGTGCAAAAGGTAGCCATGGAAAGCATAGTAATATGGGGAAAGACTCCTAAATTTAAACTACCCATACAAAAGGAGACATGGGAGACATGGTGGATGGACCACTGGCAGGCTACCTGGATTCCTGAATGGGAATTTGTCAATACCCCTCCTCTAGTAAAATTGTGGTACCAATTAGAGAAAGACCCCATAATGGGAGCAGAGACTTTCTATGTAGATGGGGCAGCCAATAGACAGACCAAACTAGGAAAAGCAGGGTATGTCACTGACAGGGGAAGACAAAAGGTTGTTTCCCTACCTGAGACAACAAATCAAAAGACTGAACTATATGCCATCCATCTAGCCTTGCAGGATTCAGGATCAGAAGTAAACATAGTAACAGACTCACAGTATGCATTAGGAATCATTCAGGCACAACCAGACAGAAGTGAATCAGAAATAGTTAATCAAATAATAGAGCAACTAATAGAAAAAGACAGAGTCTACCTATCATGGGTACCGGCACACAAAGGAATTGGAGGAAATGAACAAGTAGATAAATTAGTCAGTTCTGGAATCAGAAAGGTGCTGTTTATAGATGGGATAGATAAAGCTCAAGAGGATCATGAAAGATATCACAGCAATTGGAGAACAATGGCTAGTGATTTTAATCTGCCACCTATAGTAGCAAAAGAAATAGTAGCCAGCTGTGATAAATGTCAGCTAAAAGGAGAAGCCATGCATGGACAAGTAGACTGCAGCCCAGGGATATGGCAATTAGATTGCACACATCTAGAAGGAAAAGTAATTTTGGTAGCAGTTCATGTAGCCAGTGGCTATATAGAAGCAGAAGTTATCCCAGCAGAAACAGGACAAGAGACAGCATACTTTCTACTAAAATTAGCAGGAAGATGGCCAGTAAAAGTAGTACACACAGACAATGGCAGCAATTTTACCAGCGCTGCAGTCAAAGCAGCCTGTTGGTGGGCAGGTATCCAACAGGAATTTGGGATCCCCTACAATCCCCAAAGTCAAGGAGTAGTGGAATCTATGAATAAGGAATTAAAGAAAATCATAGGACAGGTAAGAGAGCAAGCTGAACACCTTAAAACAGCTGTACAAATGGCAGTATTCATTCACAATTTTAAAAGAAAAGGGGGGATTGGGGGGTACAGTGCAGGGGAAAGAATAATAGACATAATAGCAACAGACATACAAACTAAAGAATTACAAAAACAAATTACAAAAATTCAAAATTTTCGGGTTTATTACAGGGACAGCAGAGATCCAGTTTGGAAAGGACCAGCAAAACTGCTCTGGAAAGGTGAAGGGGCAGTAGTAATACAGGACAATAGTGATATAAAGGTAGTACCAAGAAGAAAAGCAAAAATCATCAGGGACTATGGAAAACAGATGGCAGGTGATGATTGTGTGGCAGGTAGACAGGATGAGGATTAGAACATGGCACAGTTTGGTAAAATATCATAAGTATATATCAAAGAAAGCTAAAAATTGGCATTATAGACATCACTATGAAAGTAGACATCCAAAAACATGTTCAGAAGTACATATCCCACTAGGGGATGCTAGATTAGTAGTAAGGACATATTGGGGTCTGCATACAGGAGAAAAAGACTGGCACTTGGGTCATGGGGTCTCCATAGAATGGAGGCTAAGAAGATATAGCACACAAGTAGATCCTGATCAGGCAGACCAACTAATTCATCTGCATTATTTTAACTGTTTTTCAGACTCTGCCATAAGGAAAGCCATATTAGGACAAGTAGTTAGCCCTAGGTGTGACTATCAAACAGGACATAACAAGGTAGGATCTCTACAATATTTAGCACTGAAAGCATTAGTAAAACCAGAAAAGACAAAGCCACCTTTGCCTAGTGTTAGGATATTAGCAGAGGATAGATGGAACAAGCCCCAGAAGACCAAGGGCCCCAGAGAGAGCCATACAATGAATGGATGTTAGACCTGTTAGAAGAGCTTAAGCATGAAGCCGTTAGGCATTTTCCCAGGCCATGGCTTCATGGATTAGGACAACATATCTATAACACCTATGGGGATACTTGGGAAGGAGTTGAAGCTATAATAAGAATTCTGCAACAACTACTGTTTGTTCATTTCAGAATTGGGTGCCAACATAGCAGAATAGGCATTATTCGAGGGAGAAGAGTTAGGAATGGACCCAGTAGATCCTAACCTAGAGCCATGGAACCACCCGGGAAGTCAGCCTGCAACCCCTTGTAACAAATGTTATTGTAAAAAGTGTTGCTATCATTGCCAAGCTTGCTTTTTGAACAAAGGCTTAGGCATCTCCTATGGCAGGAAGAAGCGGAGACAGCGACGAAGATCTCCTCAGAGCAGTAAGGATCATCAACATTCTACACAAGAGCAGTAAGTATTAGTAGTTGATATATGTAATGCTTCCTTTGCAAATCTTGGCAATAATAGGACTGATAGTAGCCCTAATCCTAGCAATAGTTGTATGGACTATAGTAGGTATAGAATGTAAGAAATTTCTAAAACAAAGAAAAATAGACAGGTTAATTGAGAGAATAAGAGAAAGAGCAGAAGACAGTGGCAATGAGAGTGATGGGGATACAGAGGAATTGTCAGAACTTATTGACATGGGGAACTATGATCTTGGGGATAATAATCTTCTGTAGTGCTACAGACAACTTGTGGGTTACTGTCTATTATGGGGTACCAGTGTGGAAAGACGCAGAGACCACCTTATTTTGTGCATCAGATGCTAAAGCATATGCGACAGAAAAGCATAATGTCTGGGCTACACATGCCTGTGTACCCACAGACCCCAACCCACAAGAAATACATTTGGAAAATGTGACAGAAGAATTTAACATGTGGAAAAATAACATGGTAGAACAGATGCATACAGATATAATCAGTCTATGGGACCAAAGCCTAAAACCATGTGTAAAGTTAACCCCTCTCTGCGTTACTTTAAATTGTAGCAATGCCAATGTAGGTTATAGCAATGCCACTGTTAACAACACCATCAAGGATGAAATAAAAAACTGCTCTTTCAATACAACCACAGCACTAAGGGATAAGAGACAGAAAGTATATTCACTTTTTTATAGACTTGATATAGTACAAATTGATAATAGTAGTAGTGATAGTAGTAGTAGTGAGTATAGATTAATAAATTGTAATACCTCAGCCATTACACAAGCTTGTCCAAAGGTAACCTTTGAGCCAATTCCCATACATTATTGTGCCCCAGCTGGTTTTGCAATCCTAAAGTGTAAAGATGAGGAGTTCAATGGAACAGGGCCATGCAAGAATGTCAGCACAGTACAATGCACACATGGAATCAAGCCAGTAGTATCAACTCAACTGCTGCTAAATGGCAGTCTAGCAAAAAGAGAGGTAAAAATTAGATCTGAAAATATCACAAACAATGCCAAAAATATAATAGTACAATTTGTTGATCCTGTGGAAATTAATTGTACCAGACCTAACAACAATACAAGAAAAAGTATACATATAGGACCAGGACAAGCATTCTATGCAACAGGTGACATAATAGGGGATATAAGACAAGCACATTGTAATGTCAGTAGATCATCCTGGAATAGGACTTTACAACAGGTAGCTAAACAATTAGGAACATACTTTAAGAACAAAACAATAGTATTTAATACATCCTCAGGAGGGGATCCTGAAATCACAACACATAGTTTTAACTGTGCAGGAGAATTTTTCTATTGTGATACATCAGGCCTGTTTAATAGCAGTTGGGAAAATGGCACTAACAAACAGAATTACACGGAGTCAAATGACACTATAACGCTCCAATGCAGAATAAAACAAATTATAAACATGTGGCAGAGAGTAGGCCGAGCAATGTATGCCCCTCCCATTGCAGGAGTAATAAAGTGTACATCAAACATTACAGGAATGATATTGACAAGAGACGGTGGGAAGAACAGTATTAATGAGACCTTCAGACCTGGAGGAGGAGATATGAGGGACAATTGGAGAAGTGAATTATATAAGTATAAAGTAGTAAAAATTGAACCACTAGGAATAGCACCCACAGAGGCAAGGAGAAGAGTGGTGCAGAGAGAAAAAAGAGCAGTTGGATTGGGAGCTGTTTTCCTTGGGTTCTTGGGAGCAGCAGGAAGCACTATGGGCGCGGCGTCAATAACGCTGACGGTACAGGCCAGACAATTATTGACTGGCATAGTGCAACAGCAAAGCAATTTGCTGAAGGCTATAGAGGCTCAACAACAGATGTTGAGGCTCACAGTCTGGGGCATTAAACAGCTCCAGGCAAGAGTCCTGGCTCTGGAAAGATACCTACAGGATCAACAGCTCCTAGGAATTTGGGGCTGCTCTGGAAAACTCATCTGCGCCACTGATGTGAGATGGAACTCTAGTTGGAGTAATAAGACTCAGGAGCAGATTTGGAAAAACATGACCTGGTTGCAATGGGATAAGGAAATTAGCACTTACACAGACATAATATATATGCTACTTGAGGAATCGCAGAACCAGCAGGAAAAGAATGAACAAGACTTATTGGCATTAGACAAATGGGCAAATTTGTGGAATTGGTTTGACATAACAAGATGGCTGTGGTATATAAAAATATTTATAATGATAGTAGGAGGCTTGATAGGATTAAGAATAGTTATTGCTATAATTTCTGTAGTAAAAAGAGTTAGGCAGGGATACTCACCATTGTCATTTCAGATCCCTACCCCAAACCCAGAGGGACTCGACAGGCCCGGAAGAATCGAAGAAGAAGGTGGAGAGCAAGGCAGAGACAGATCGATTCGATTAGTGAGCGGATTCTTAGCACTTGCCTGGGACGACCTACGGAGCCTGTGCCTCTTCAGCTACCACCGCTTGAGAGATTGCATCTTGATTGCAGCGAGGATTGTGGAACTTGTGGGACACAGCAGTCTCAAGGGGCTGAGACTGGGGTGGGAAGGCCTCAAACATCTGTGGAATCTTCTGGTATATTGGGGTCAGGAATTGAAGACTAGTGCTATTAGATTGCTTGATACCATAGCAGTAGCAGTAGCTGAGTGGACAGATAGGGTTATAGAAATAGGACAAAGAGCTTGCAGAGCTATCCGCAACATACCTAGAAGAATCAGACAGGGCCTCGAAAGGGCGTTACTATAAAATGGGGGGCAAGTGGTCAAAAAGAACCATAGTGGGATGGCCTGAGATTAGGGAAAGAATGAGACGAACTCCTCCAGCAGCAGAAGGAGTAAGACCAACTCCTCCAGCTGCAGAAGGAGTAGGAGCAGTGTCTCAAGATTTAGCCAGACATGGAGCAGTCACAAGCAGTAATACAGCAGCTAACAATCCTGATTGCGCCTGGCTGGAAGCGCAAGAAGAGGAGGAAGTAGGCTTTCCAGTCAGGCCACAGGTACCTTTAAGGGCGATGACCTACAAGGGAGCTGTAGATCTCAGCCACTTTTTAAAAGAAAAGGGGGGACTGGATGGGCTAATTTACTCCCAGAGAAGACAAGACATCCTTGATCTGTGGGTCTACAACACACAGGGCTACTTCCCTGATTGGCAGAATTACACACCAGGGCCAGGGGCCAGGTTCCCACTAACATTTGGATGGTGCTTCAAGCTAGTACCAGTTGATCCATCTGAGGTAGAAGAGGCTACGGAGGGGGAGAACAACAGTTTATTACACCCCATATGCCAACATGGAGCAGAGGACCCTGAAAGAGAAGTGTTAAAGTGGAAGTTTGATAGTCGCCTGGCGCTGAGACACCTAGCCAGAGAGCAGCATCCGGAGTTCTACAAAGACTGCTGACACAGAAGATGCTGACACAGAAGTTGCTGACAGGGACTTTCCACGGGGACTTTCCGGGGAGGTGTGGTGAGGGCGGAGTTGGGAGTGGCTAACCCTCAGATGCTGCATATAAGCAGCTGCTTTGCGCCTGTACTGGGTCTCTCCTTGTTGGACCAGATAGAGCCTGGGAGCTCTCAGGCTAGCAGGGGAACCCA
>A1.TZ.01.A341.AY253314_B.DK.x.CTL_033.EF514709
GCGAGAGCGTCAGTATTAAGTGGGGGAAAATTAGATGCATGGGAAAAAATTCGGTTAAGGCCAGGGGGAAAGAAAAAATATAGAATGAAACATTTAGTATGGGCAAGCAGGGAGCTGGAAAGATTTGCACTTAACCCTAGCCTTTTAGAAACGAAAGAAGGATGTCAACAAATAATAGGACAGTTACAACCATCTCTCCAAACAGGAACAGAGGAACTTAGATCATTATATAATACAGTAGCAACCCTCTATTGTGTACATCAACGGATAGATGTAAAAGACACCAAGGAAGCTCTAGATAAAATAGAGGAAATGCAAAATAAGAGCCAGCAAAAGACACAACAGGCAGCAGCCGATACAGGAAACAACAGCAAGGTCAGTCAAAATTACCCTATAGTGCAAAATGCACAAGGGCAAATGATACACCAGAATTTGTCACCTAGGACTTTAAATGCATGGGTAAAAGCAATAGAAGAAAAGGCTTTCAGCCCAGAAGTAATACCCATGTTCTCAGCATTATCAGACGGATGCACCCCACACGATTTAAATATGATGCTGAACATAGTGGGAGGACACCAGGCAGCTATGCAAATGTTAAAAGATACCATCAATGAGGAAGCTGCAGAATGGGACAGGTTACATCCAGTACAGGCAGGGCCTATTCCACCAGGCCAGATGAGAGAACCAAGGGGAAGTGACATAGCAGGAACTACTAGTACCCCTCAAGAGCAGATAGGATGGATGACAGGCAATCCACCTATCCCAGTGGGAGACATCTATAAAAGATGGATAATCCTGGGATTAAATAAAATAGTAAGAATGTATAGCCCTGTTAGCATTTTGGATATAAAACAAGGACCAAAAGAACCCTTTAGAGATTATGTAGATAGGTTCTTTAAAACTCTCAGAGCTGAGCAAGCTACACAGGAGGTAAAAGGTTGGATGACAGAAACATTACTGGTCCAAAATGCAAATCCAGATTGTAAGTCCATTTTAAGAGCATTAGGAACAGGGGCTACGTTAGAAGAAATGATGACAGCATGTCAAGGAGTGGGAGGACCCGGCCATAAAGCAAGGGTTTTGGCTGAGGCAATGAGTCAAGTACAACATACAAACAACATAATGATGCAGAGAGGCAATTTCAGGGGCCAGAAAAGAATTAAGTGTTTTAACTGTGGCAAAGAAGGACACCTAGCCAGAAATTGCAGGGCCCCTAGGAAAAAGGGCTGTTGGAAGTGTGGGAAGGAGGGACACCAAATGAAAGACTGCACTGAAAGACAGGCTAATTTTTTAGGGAAAATTTGGCCTTCCAACAAGGGGAGGCCAGGAAATTTTCCTCAGAGCAGACTGGAGCCAACAGCCCCACCAACAGAGATCTGGGGGATGGGGGGAGAAATAGTCTCCCCTCCGAAGCAGGAGCAGAAAGACAGGGAGCAGGCCTCACCTTCAGTTTCCCTCAAATCACTCTTTGGCAACGACCCCTTGTCACAGTAAGGATAGGGGGACAGCTAAAAGAAGCTCTATTAGATACAGGAGCAGATGATACAGTATTAGAAGACATAAATCTGCCAGGAAAATGGAAACCAAAAATGATAGGGGGAATTGGAGGTTTCATCAAGGTAAAACAGTATGATCAGATACTTATAGAAATTTGTGGAAAAAAGGCTATAGGTACAGTATTAGTAGGACCTACACCTGTCAACATAATTGGAAGAAACATGTTGACCCAGATTGGTTGTACTTTAAATTTCCCAATTAGTCCTATTGAGACTGTACCAGTAAAATTAAAGCCAGGAATGGATGGCCCAAAAATTAAACAATGGCCATTGACAGAAGAAAAAATAAAAGCATTAACAGAGATTTGTACAGAGATGGAAAAGGAAGGAAAAATTTCAAAAATTGGGCCTGAAAACCCATACAATACTCCAATATTTGCAATAAAGAAAAAAGACAGCACTAAATGGAGAAAATTAGTAGATTTCAGAGAGCTTAATAAAAGAACACAAGACTTTTGGGAAGTTCAATTAGGAATACCGCATCCAGCGGGCCTAAAAAAGAAAAAATCAGTAACAGTACTGGATGTGGGGGACGCATATTTTTCAGTTCCGTTAGATGAAGACTTTAGAAAGTATACTGCGTTCACCATACCTAGTACCAACAATGAGACACCAGGAATCAGGTATCAGTATAATGTGCTTCCACAGGGATGGAAAGGATCACCAGCAATATTCCAGAGTAGCATGACAAAAATCTTAGAGCCCTTTAGATCAAAAAATCCAGAAATAGTTATCTACCAATACATGGATGACTTGTATGTAGGATCTGATTTAGAAATAGGGCAGCATAGAACAAAAATAGAAGAGTTAAGGGCTCATCTATTGAGCTGGGGATTTACTACACCAGACAAAAAGCATCAGAAAGAACCTCCATTCCTTTGGATGGGATATGAGCTCCATCCTGACAAGTGGACAGTCCAGCCTATAGTGCTGCCAGAAAAAGAAAGCTGGACTGTCAATGATATACAGAAATTAGTAGGGAAACTAAATTGGGCAAGTCAAATTTATGCAGGGATTAAAGTAAAGCAATTGTGTAAACTCCTCAGAGGAGCCAAAGCACTAACAGAGATAGTAACATTGACTGAAGAAGCAGAATTAGAATTGGCAGAGAACAGGGAGATTCTAAAAGACCCTGTGCATGGGGTATATTATGACCCATCAAAAGACTTAGTAGCAGAAATACAGAAACAAGGGCAAGACCAATGGACATACCAAATTTATCAAGAGCCATTTAAAAATCTGAAAACAGGAAAATATGCAAGAAAAAGGTCTGCTCACACTAATGATGTAAAACAACTAACAGAAGTGGTGCAAAAGGTGGTCATGGAAAGCATAGTAATTTGGGGAAAGATTCCTAAATTTAAATTACCCATACAAAAAGAGACATGGGAAACATGGTGGATGGATTATTGGCAGGCTACCTGGATTCCTGAATGGGAGTTTGTCAATACCCCTCCTCTAGTAAAATTATGGTACCAATTGGAGAAAGACCCCATAGCAGGAGCAGAGACTTTCTATGTAGATGGGGCAGCCAATAGGGAAACTAAGCTAGGAAAAGCAGGGTATGTCACTGACAGAGGAAGACAAAAGGTTGTTTCCTTAACTGAGACAACAAATCAAAAGACTGAACTACATGCAATCTGTCTAGCCTTGCAGGATTCAGGATCAGAAGTAAACATAGTAACAGACTCACAGTATGCATTAGGAATTATTCAGGCACAACCAGACAAGAGTGAATTAGAGATAGTCAATCAAATAATAGAGAAACTAATAGGAAAGGACAAAGTCTACCTGTCATGGGTACCAGCACACAAAGGAATTGGAGGAAATGAACAAGTAGATAAATTAGTCAGTTCTGGAATCAGAAAGGTGCTGTTTTTAGATGGGATAGATAAAGCTCAAGAAGACCATGAAAGATATCACAGCAATTGGAGACAAATGGCTAGTGATTTTAATCTGCCACCTATAGTAGCAAAGGAAATAGTAGCCAGCTGTGATAAATGCCAGCTAAAAGGGGAAGCCATGCATGGACAAGTAGACTGCAGTCCAGGGATATGGCAATTAGATTGTACACATCTAGAAGGAAAAGTAATTCTGGTAGCAGTTCATGTAGCCAGTGGCTATATGGAAGCAGAAGTTATCCCAGCAGAAACAGGACAAGAGACAGCATACTTTATACTAAAATTAGCAGCAAGATGGCCAGTAAAAACAGTACATACAGACAATGGCAGCAATTTCACCAGTGCTGCAGTTAAAGCAGCCTGTTGGTGGGCAAATATCCAACAGGAATTTGGGATTCCCTACAATCCACAAAGTCAAGGAGTAGTGGAATCTATGAACAAAGAATTAAAGAAAATCATAGGACAGGTAAGAGAGCAAGCTGAACACCTTAAAACAGCAGTACAAATGGCAGTATTCATTCACAATTTTAAAAGAAAAAGGGGGATTGGGGGGTACAGTGCAGGAGAAAGAATAATAGACATAATAGCAACAGACATACAAACTAAAGAATTACAAAAACAAATTACAAAAATTCAAAATTTTCGGGTTTATTACAGAGACAGCAGAGATCCACTTTGGAAAGGACCAGCAAGACTACTCTGGAAAGGTGAAGGGGCAGTAGTAATACAGGACAATAGTGATATAAAGGTAGTACCAAGAAGAAAAGCAAAGATCCTTAAGGATTATGGAAAACAGATGGCAGGTGATGATTGTGTGGCAGGTAGACAGAATGAGGATTAGAACATGGAACAGTTTAGTAAAACATCATATGTATGTCTCAAAGAAAGCTAACAGATGGTTGTATAGACATCACTTTGAAAGTAGGCATCCAAAAGTAAGTTCAGAAGTACACATCCCACTAGGGGATGCTAGATTAGTAGTAAGAACATATTGGGGTCTGCATACAGGAGAAAAAGACTGGCACTTGGGTCATGGGGTATCTATAGAATGGAGGCTAAAAAGATATAGCACACAAATAGATCCTGACATGGCAGACCAACTAATTCATCTGCATTATTTTGACTGTTTTTCAGACTCTGCCATAAGGAAAGCCATATTAGGACACGTAGTTAGCCCTAGCTGTGAATATCAAACAGGACATAACAAGGTAGGATCTCTACAATATTTAGCATTGAAAGCATTAATAACACCAACAAAGACAAAGCCACCTTTGCCTAGTGTTAGGATATTAGCAGAGGACAGATGGAACAAGCCCCAGAAGACCAGGGGCCACAGAGGGAGCCATACAATGAATGGATGTTAGATCTGTTAGAGGATCTTAAGCATGAAGCCGTGAGACATTTTCCTAGACCATGGCTTCATGAGTTAGGACAACAGATCTATCACACCTATGGGGATACTTGGGAAGGAGTTGAAGCTATAGTGAGAACTCTGCAACAACTACTGTTTGTTCATTTCAGAATTGGGTGCCAACATAGCAGAATAGGCATTATTCGAGGGAGAAGAGGCAGGAATGGATCCGGTAGATCCTAACCTAGAGCCCTGGAACCACCCGGGAAGTCAGCCTATAACTGCTTGTAACAAATGCTACTGTAAAAAGTGTTGCTATCACTGCCAAGCTTGCTTTTTGAACAAAGGCTTAGGCATCTCCTATGGCAGGAAGAAGCGGAAGCAGCGACGAGGAACTCCTCAGGGCAATAAGGACCATCAAAATCCTGTACGAAAGCAGTAAGTATCAGATGTAATGGTGTCGCCTTTGCACATCTGCGCAATAGTAGGACTAATAGTAGCGCTAATCCTAGCAACAGTTGTGTGGACTATAGTAGGTATAGAATATAAAAAATTGCTAAAACAAAGAAAAATAGACAGGTTAATTGAGAGAATAAGAGAAAGAGCAGAAGACAGTGGCAATGAGAGTGATGGAGATACAGAGGAATTGTCAGCACTTATTGAGATGGGGAATTATGATCTTGGGGATGATAATAATCTGTAGTACTGCAGACAACTTGTGGGTCACAGTCTATTATGGGGTACCTGTGTGGAAAGAAGCAACCACCACTCTATTTTGTGCATCAGATGCTAAAGCATATGATACAGAGGCACATAATGTTTGGGCCACACATGCCTGTGTACCCACAGACCCCAACCCACAAGAAGTAGTATTGAAAAATGCGACAGAACCTTTTGATATGTGGAAAAATAACATGGTAGAACAAATGCATGAGGATATAATTAGTTTATGGGATCAAAGCCTAAAGCCATGTGTAAAATTAACCCCACTATGTGTTACTTTAAATTGCASTGATGTTACTTTAAATTSTCATGAATTGAGTAAGAATAGTAMTAATAGTAAGAATAGTACTAATACCAATAGTAGTAGCACGAGATTAACGACGGAGGCAGAAGAAATGAAAAACTGCTCTTTYAATATYACCACAAGCATAAGAGATAAGATACAAAAAGAATATGCTCTTTTTTATACAGTTGATRTAGTACCAATAGATAAWAATAGTACCAAMTATACATTGATAAATTGTAACACCTCAGTCATTACACARGCCTGTCCAAAGATATCCTTTGAGCCAATTCCCATACATTATTGTGCCCCGGCTGGTTTTGCGATTCTAAAGTGTAACGATAAGAAGTTCAATGGAACAGGACCATGTACAAATGTCAGCACAGTGCAATGTACACATGGAATTAGGCCAGTAGTGTCAACTCAACTGCTGTTAAATGGCAGTCTAGCAGAAGAAGAGGTARTACTTAGATCTAAAAATTTTACGGACAATACTAAAACCATAATAGTACAGCTGAAAGAAGCTGTAAAAATTAATTGTACAAGACCCAACAACAATACAAGGAAAAGTGTACATATAGGACCAGGGAGAGCATTTTATGCAACAGGAGATATAATAGGAAATATAAGACAAGCACATTGTAACATTAGTAGAACAAAATGGAATAACACTCTAGAACAGATAGCCAAAAAATTAAAAGAACAATTTAAGAATAAAACAATAGTCTTTAATCACTCCTCAGGAGGGGACCTAGAAATTGTAATGCACAGTTTTAATTGTGGAGGGGAATTTTTCTACTGTAATACAACACAACTGTTTAATAGTACTTGGAATAGTACTACAGGGTCAAATAACACTGAAAGAAATGACACAATCACACTCCCTTGCAGAATAAAACAAATTGTAAACAGGTGGCAGGAAGTAGGAAAAGCAATGTATGCCCCTCCCATCAAAGGACAAATTAGATGTTCATCAAATATTACAGGGCTGCTATTAACAAGAGATGGTGGTAATAACGCAAGCGGGCCTGAGATCTTCAGACCTGGAGGAGGAGATATGAGGGATAATTGGAGAAGTGAGTTATATAAATATAAAGTAGTAAAAATTGAACCATTAGGAGTAGCACCCACCAAGGCAAAGAGAAGAGTGGTGCAGAGAGAAAAAAGAGCGGCAGGACTAGGAGCTATGTTCCTTGGGTTCTTGGGAGCAGCAGGAAGCACTATGGGCGCAGCGTCAATAACGCTGACGGTACAGGCCAGACAATTATTGTCTGGTATAGTGCAACAGCAGAACAATCTGCTGAGGGCTATTGAGGCGCAACAGCATCTGTTGCAACTCACAGTCTGGGGCATCAAACAGCTCCAGGCAAGAGTCCTGGCTGTGGAAAGATACCTAAAGGATCAACAGCTCCTGGGAATTTGGGGTTGCTCTGGAAAACTCATTTGCACCACTGCTGTGCCTTGGAATACTAGTTGGAGTAATAAAAGTCTAAGTCAGATTTGGGATAACATGACCTGGATGCAGTGGGAAAAAGAAATTGACAATTACACAAGCWTAATATACACCTTAATTGAAGAATCGCAGAACCAGCAAGAAAAGAATGAACAAGAATTATTGGAATTAGATAAATGGGCAAGTTTGTGGAATTGGTTTAATATAACACAATGGCTGTGGTATATAAAAATATTCATAATGATAGTAGGAGGCTTGATAGGTTTAAGAATAGTTTTTACTGTACTTTCTATAGTGAATAGAGTTAGGCAGGGATACTCACCATTATCGTTGCAGACCCTCCTCCCAGCACCGAGGGGACCCGACAGGCCCGAAGGAATCGGAGAAGAAGGTGGAGAGAGAGACAGAGACACATCCGGACCATTAGTGGATGGATTCTTGACACTTATCTGGGTCGACCTGCGGAGCCTGTGCCTCTTCAGCTACCGCCACTTGAGAGACTTACTCTTGATAGTAGCGAGGAKTGTGGAACTTCTGGGACGCAGGGGGTGGGAAACCCTCAAATATTGGTGGAATCTCCTACAGTATTGGAGTCAGGAACTAAAGAATAGTGCTGTTAGCTTGTTCAACGCCACAGCAATAGCAGTAGCTGAGGGGACAGATAGGGTTATAGAATTATTACAAAGAATTGGTAGAGCTATTCTCCACATTCCTACAAGAATAAGACAGGGCTTGGAAAGGCTTTTGCTATAAAATGGGAGGCAAGTGGTCAAAACGTGAGGCKGGATGGTCTACTATAAGGGACAAAATGAAGCGCACTGAGCCAGCAGCAGAAGGGGTGGGAGCAGTATCTCGAGACCTGGAAAAACATGGGGCAATCACAAGTAGCAATACAGCAGCTAACAATCCTGATTGTGCCTGGCTAGAAGCACAAGAGGAGGAGGAGGAGGTGGGCTTTCCAGTCAAACCTCAGGTACCTTTAAGACCAATGACTTACAAGGCAGCTGTAGATCTTAGCCATTTTTTAAAAGAAAAGGGGGGACTGGAAGGGCTAATTTACTCCAAGGAAAGACAAGATATCCTTGATYTGTGGATCTACAACAC
>A1.RW.92.92RW025A.AB287376_B.US.94.94US_33931N.AY713410
TGGATGGGTTAATTTACTCCAAGCAAAGACAAGATATCCTTGATCTGTGGGTCTACCACACACAAGGCTACTTCCCTGATTGGCAGAATTACACACCAGGGCCAGGAGTCAGATACCCACTAACATTTGGATGGTGCTTCAAGCTAGTACCAGTTGATCCAGATGAAGTAGAGAAGGATACTGAGGGAGAGAACAACAGCCTATTACACCCTATATGCCAACATGGAATGGATGATGAGGAGAAAGAAGTATTAAGGTGGAAATTTGACAGCCGCCTGGCACTAAAACACAGAGCCCAAGAGATGCATCCGGAGTTCTACAAAGACTGCTGACACAGAAGTTGCTGACAGGGACTTTCCGCTGGGACTTTCCAGGGGAGGTGTGGTTTGGGCGGAGTTGGGGAGTGGCCAACCCTCAGATGCTGCATATAAGCAGCTGCTTTTCGCTTGTACTGGGTCTCTCTAGGTAGACCAGATCCGAGCCTGGGAGCTCTCTGGCTATCTGGGGAACCCACTGCTTAAGCCTCAATAAAGCTTGCCTTGAGTGCTCTAAGTAGTGTGTGCCCGTCTGTTGTGTGACTCTGGTAACTAGAGATCCCTCAGACCACTCTAGACTGAGTAAAAATCTCTAGCAGTGGCGCCCGAACAGGGACTCGAAAGCGAAAGTAAGACCAGAGAAGTTCTCTCGACGCAGGACTCGGCTTGCTGAGGTGCACACAGCAAGAGGCGAGAGCGGCGACTGGTGAGTACGCCAATTTTTGACTAGCGGAGGCTAGAAGGAGAGAGATGGGTGCGAGAGCGTCAGTATTAAGCGGGGGAAAATTAGATGCATGGGAGAGAATTCGGTTAAGGCCAGGGGGAAAGAAAAAATATAGAATGAAACATCTAGTATGGGCAAGCAGGGAGCTGGAAAGATTTGCACTTAACCCTGGCCTGTTAGAAACAACAGAAGGATGTCAACAAATAATAGAACAGTTACAACCAGCTCTCAAGACAGGAACAGAAGAACTTAGATCATTATTTAATACAGTAGTAACCCTCTATTGTGTACATCAACGGATAGAGGTAAAAGACACCAAGGAAGCTCTAGATAAAATAGAGGAAATACAAAATAAGAGCAAGCAAAAGACACAACAGGCAGCAGCTGCCACAGGAAACAGCAGCAATGTCAGCCAAAATTACCCTATAGTGCAAAATGCACAAGGGCAAATGGTACACCAGGCTGTATCACCTAGGACATTGAATGCATGGGTGAAGGTAATAGAAGAAAAGGCTTTCAGCCCAGAAGTAATACCCATGTTCTCAGCATTGTCAGAAGGAGCCACCCCACAAGATTTAAATATGATGCTAAACATAGTGGGGGGACACCAGGCAGCTATGCAGATGTTGAAAGATACCATCAATGAGGAAGCTGCAGAATGGGACAGGTTACATCCAGTACAGGCAGGGCCTATTCCACCAGGCCAATTGAGAGAACCAAGGGGAAGTGACATAGCAGGAACTACTAGTACCCCTCAAGAACAAATAGGATGGATGACAGGCAACCCACCTATTCCAGTGGGAGACATCTATAAAAGATGGATAATCCTGGGATTAAATAAAATAGTAAGAATGTATAGCCCTGTTAGCATTTTGGACGTAAAACAAGGGCCAAAAGAACCCTTCAGAGACTATGTAGATAGGTTCTTTAAAATTCTCAGAGCTGAGCAAGCTACACAGGAGGTAAAAGGTTGGATGACAGAAACCTTGCTGGTCCAAAATGCAAATCCAGATTGTAAGTCCATTTTAAGAGCACTAGGAACAGGAGCTACATTAGAAGAAATGATGACAGCATGCCAGGGAGTGGGAGGACCCGGCCATAAAGCAAGGGTTTTGGCTGAGGCAATGAGTCAAGTACAACATACAAACATAATGATGCAGAGAGGCAATTTTAGGGGTCAGAGAAGGATGATTAAATGTTTCAATTGTGGCAAAGAAGGACACCTAGCCAGAAATTGCAGAGCCCCTAGGAAAAAGGGCTGTTGGAAATGTGGGAAAGAGGGACACCAAATGAAGGACTGCACTGAAAGACAGGCTAATTTTTTAGGGAAAATTTGGCCTTCCAGCAAGGGGAGGCCAGGAAACTTTCCCCAGAGCAGGCCAGAGCCAACAGCCCCACCAGCAGAGCTCTTTGGGATGGAGGAAGAAAAAACCTCCGCTCTGAAGCAGGAGCAGAAGGACAGGAAACAGGACCCACCTTTAGTTTCCCTCAAATCACTCTTTGGCAACGACCCCTTGTCACAGTAAAAGTAGGGGGACAGCTAAAAGAAGCTCTATTAGATACAGGAGCAGATGACACAGTATTAGAAGATATAAATTTGCCAGGAAAATGGAAACCAAGAATGATAGGGGGAATTGGAGGTTTTATCAAAGTAAAACAGTATGATCAGATACTTATAGAAATTTGTGGAAAAAAGGCTATAGGTACAGTATTAGTAGGACCCACACCTGTCAACATAATTGGAAGGAATATGTTGACCCAGATTGGATGTACTTTAAATTTCCCAATTAGTCCTATTGAGACTGTGCCAGTAAAATTAAAGCCAGGAATGGATGGCCCAAAGGTTAAACAATGGCCATTGACAGAAGAAAAAATAAAAGCATTAACAGAAATTTGTACAGATATGGAAAAGGAAGGAAAAATTTCAAGAATTGGGCCTGAAAATCCATACAATACTCCAATATTTGCTATAAAGAAAAAAGACAGCACTAAATGGAGGAAACTAGTAGATTTCAGAGAGCTCAATAAAAGAACACAAGACTTTTGGGAAGTTCAATTGGGAATACCGCATCCAGCGGGCCTAAAAAAGAAAAAATCAGTAACAGTACTAGATGTGGGGGACGCATATTTTTCAGTTCCTTTAGATGAAAGCTTTAGAAAGTATACTGCGTTCACCATACCTAGTACAAATAATGAGACACCAGGAATCAGGTATCAATACAATGTGCTGCCACAGGGATGGAAAGGATCACCGGCAATATTCCAGAGTAGCATGACAAAAATCTTAGAGCCCTATAGATCAAAGAATCCAGAAATAATTATCTATCAATACATGGATGACTTGTATGTAGGATCTGATTTAGAAATAGGGCAGCATAGAACAAAAATAGAGGAGTTGAGAGCTCATCTATTGAGCTGGGGATTTACTACACCAGACAAAAAGCATCAAAAAGAACCTCCATTTCTTTGGATGGGGTATGAACTCCATCCTGACAAATGGACAGTACAGCCTATACAACTGCCAGAAAAGGATAGCTGGACTGTCAATGATATACAGAAGTTGGTGGGGAAACTGAATTGGGCAAGTCAAATTTATGCAGGGATTAAAGTAAAGCAACTGTGCAAACTCCTCAGGGGAGCCAAAGCACTAACAGAGGTAGTAACTCTGACTGAGGAAGCAGAATTAGAATTGGCAGAGAACAGGGAAATTCTAAAAGACCCTGTGCATGGAGTATATTATGACCCATCAAAAGAATTAATAGCAGAAATACAGAAACAAGGGCAAGACCAATGGACATATCAAATTTATCAAGAGCCATTTAAAAATCTAAAAACAGGAAAATATGCAAGAAAAAGGTCTGCTCACACTAATGATGTAAAGCAATTAGCAGAAGTGGTGCAAAAGGTGGTCATGGAGAGCATAGTAATATGGGGAAAGACTCCTAAATTTAAACTACCCATACAAAAAGAGACATGGGAAACATGGTGGATGGACTATTGGCAGGCTACCTGGATTCCTGAATGGGAGTTTGTCAATACCCCTCCCCTAGTAAAATTGTGGTACCAGTTAGAGAAAGACCCTATAGCAGGAGCAGAAACTTTCTATGTAGATGGGGCAGCCAATAGGGAGACTAAGCTAGGAAAAGCAGGGTATGTAACTGACAGAGGAAGACAAAAGGTTGTTTCCCTAACTGAGACAACAAATCAAAAGACTGAACTACATGCAATCCATCTAGCCTTACAGGATTCAGGATCAGAAGTAAACATAGTAACGGACTCACAGTATGCATTAGGAATCATTCAGGCACAACCAGACAGGAGTGAATCAGAATTAGTCAATCTAATAATAGAGGAGCTAATAGAAAAGGACAAGGTCTACCTGTCATGGGTACCAGCACACAAAGGAATTGGAGGAAATGAACAAGTAGATAAATTAGTCAGTTCCGGAATTAGGAAGGTGCTGTTTTTAGATGGGATAGATAAAGCTCAAGAAGAACATGAAAGATATCACAGCAATTGGAAAGCAATGGCTAGTGATTTTAATCTGCCACCTATAGTAGCAAAGGAAATAGTAGCCAGCTGTGATAAATGCCAACTAAAAGGAGAAGCCATGCATGGACAGGTAGACTGTAGTCCAGGAATATGGCAATTAGATTGCACACATCTAGAAGGAAAAGTAATCCTGGTAGCAGTCCATGTAGCCAGTGGTTATATAGAAGCAGAAGTTATCCCAGCAGAAACAGGACAAGAGACAGCATACTTTCTACTAAAATTAGCAGGAAGATGGCCAGTAAAAGTAGTACACACAGACAATGGAGGCAATTTCACCAGTGCTGCAGTTAAAGCAGCCTGTTGGTGGGCAAATATCCAACAGGAATTTGGGATTCCCTACAATCCCCAAAGTCAAGGAGTAGTGGAATCTATGAATAAAGAATTAAAGAAAATCATAGGGCAGGTAAGAGATCAAGCTGAACATCTTAAGACAGCAGTACAAATGGCAGTATTCATTCACAATTTTAAAAGAAAAGGGGGGATTGGGGGGTACAGTGCAGGGGAAAGGATAATAGACATAATAGCAACAGACATGCAAACTAAAGAATTACAAAAACAAATTACAAAAATTCAAAATTTTCGGGTTTATTACAGGGACAGCAGAGATCCAATTTGGAAAGGACCAGCAAAACTACTCTGGAAAGGTGAAGGGGCAGTAGTAATACAGGACAATAGTGATATCAAGGTAGTACCAAGAAGAAAAGCAAAGATCATTAGGGATTATGGAAAACAGATGGCAGGTGATGATTGTGTGGCAGGTAGACAGGATGAGGATTAGAACATGGAACAGTTTAGTAAAATATCATATGTATGTCTCAAAGAAAGCTCGAAAGTGGCTCTATAGACATCACTATGATAGCAGGCATCCAAAAGTAAGTTCAGAAGTACACATCCCACTAGGGGATGCTAGATTAGTAGTAAGAACATATTGGGGTCTGCATACAGGAGAAAAAGACTGGCAATTGGGTCACGGGGTCTCCATAGAATGGAGGCTAAGAAGATATAGCACACAAATAGATCCTGACCTAGCAGACCAACTAATTCATCTGCATTATTTTGACTGTTTTTCAGAATCTGCCATAAGGAGAGCCATATTAGGACAAGTAGTTAGCCCTAGGTGTGTATATCCAACAGGACATAACCAGGTAGGATCCCTACAATATCTAGCACTGAAGGCATTAGTAACACCAATAAAGACAAGACCACCTTTGCCTAGTGTTAAGATATTAACAGAGGATAGATGGAACAAGCCCCAGAAGACCAGGGGCCACAGAGGGAACCATACAATGAATGGATGTTAGAACTGTTAGAAGATCTTAAACATGAAGCAGTTAGACACTTTCCTAGACCATGGGCTAGGACAACATATATATAACACCTATGGGGATACTTGGGAAGGAGTCGAAGCTATAGTAAGAATTTTGCAACAACTACTGTTTGTTCATTTCAGAATTGGGTGCCAACATAGCAGAATAGGCATTATTCAAGGGAGAAGAGTCAGAAATGGAGCCGGTAGATCCTAACTTAGAGCCCTGGAACCATCCGGGAAGTCAGCCTACAACTGCTTGTACCAAGTGTTACTGTAAAAAGTGTTGCTATCATTGCCTAGTTTGCTTTCTGAACAAAGGCTTAGGCATCTCCTATGGCAGGAAGAAGCGGAGCAAGCGACGACGAACTCCTCACAGCAGTAAGGATCATCAAAATCCTATACCAAAGCAGTAAGTATCAGTAATTAGTATATGTAATGAGTCCTTTAGAAATCTGTGCAATAGTAGGATTGATAGTAGCGCTAATCATAGCAATAGTTGTGTGGACTATAGTAGGTATAGAATATAAGAGATTGTTAAAGCAAAGGAAAATAGACAGGTTAATTAAGAAAATACGAGAAAGAGCAGAAGACAGTGGCAATGAGAGTGATGGGGACATGGATGAATTGGCAAAACTTGTGGAGAGGGGGAACTATGATCTTGGGGATGTTAATGATCTGTAGTACTGCAGAAAACTTGTGGGTTACTGTCTACTATGGGGTACCTGTGTGGAAAGATGCAGAAACCACCTTATTTTGTGCATCAGATGCTAAAGCATACGACACAGAGGCGCATAATGTCTGGGCTACACATGCCTGTGTACCCACAGACCCCAACCCACAAGAAATATATTTGGAAAATGTGACAGAAGAGTTTAACATGTGGAAAAATAACATGGTAGAGCAGATGCATACAGATATAATCAGTCTATGGGATCAAAGCCTAAAGCCATGTGTACAGTTAACCCCTCTCTGCGTTACTTTAAATTGTAATAACATCACCATCAATAACATCACCACCAACATCACTGAGGACATGAGAGGAGAAATAAAAAACTGCTCGTACAATATGACCACAGTATTAAGGGATAAGAGAAGGAAAGTGTATTCACTTTTTTATAGACTTGATATAGTACCACTTGATGAGGGGAATAATAACTCTGCTGGGAGTAGTGACTATAGATTAATAAATTGTAATACCTCAACCATAACACAAGCCTGTCCAAAGGTCTCTTTTGACCCAATTCCTATACATTATTGTGCTCCAGCTGGTTTTGCGATTCTAAAATGTAAGGATCCAGATTTCAATGGAACAGGGCCATGCAAGAATGTCAGCACAGTACAATGCACACATGGAATCAAGCCAGTAGTATCAACTCAACTGCTGTTAAATGGCAGTCTAGCAGAAGGAAAGGTAAGAATTAGATCTGAAAATATTACAAACAATGCCAAAAACATAATAGTACAACTTGTCAAGCCTGTAAAAATTAATTGTGTCAGACCTAACAACAATACAAGAACAAGTGTACGTATAGGACCAGGACAAACATTCTATGCAACAGGTGAAATAATAGGGGATATAAGACAAGCATTTTGTACTGTCAATGAATCAGAATGGAATGAAACTTTACAACAGGTAGCTACGCAATTAAGAGAACACTTTGAGAACAAAACAATAAAATTTACTAACTCCTCAGGAGGGGATTTAGAAATTACAACACATAGCTTTAATTGTGGAGGAGAATTTTTCTATTGTAATACATCAGGCCTGTTTAATAGCACCTGGAATAATAATAATACCAGGGAGAAGATAAATGGTACAGAGTCAAATAGCACTATAACTCTCCATTGCAGAATAAAGCAAATTATAAATAGGTGGCAGGAAGTAGGACAAGCAATGTATGCCCCTCCCATCCCAGGAGTAATAAATTGTAGATCAAACATTACAGGACTAATATTAACAAGAGATGGTGGGGATGGGGATAACAATACGGAGACCTTCAGACCTGGAGGAGGAGATATGAAGGACAATTGGAGAAGTGAATTATATAAATATAAAGTAGTAAAAATTGAGCCATTAGGAGTAGCACCCACCAAGGCAAAGAGAAGAGTGGTGCAGAGAGAAAAAAGAGCAGTGACACTAGGAGCTATGTTCCTTGGGTTCTTGGGAGCAGCAGGAAGCACTATGGGCGCAGCGTCAGTGACGCTGACGGTACAGTCCAGACAATTATTGTCTGGTATAGTGCAACAGCAAAACAATTTGCTGAGAGCTATTGAGGCGCAACAGCATCTGTTGCAACTCACAGTCTGGGGCATTAAACAGCTCCAGGCAAGAGTCCTGGCTATAGAAAGATACCTAAAGGATCAACAGCTCCTAGGGATCTGGGGTTGCTCTGGAAAACTCATTTGCACCACTGCTGTGCCTTGGAATGCCAGTTGGAGTAATAAATCTCTGAATCAGATTTGGGATAACATGACCTGGATGGAGTGGGAGAGAGAAATTGACAATTACACAAGCTTAATATACACCTTAATTGAAGAATCGCAGAACCAACAAGAAAAGAATGAACAAGAGTTATTGGCATTGGATACGTGGGCAAGTTTGTGGAATTGGTTTAGCATAACAAAATGGCTGAGGTATATACAAATATTCATAATAATAGTAGGAGGTTTAGTAGGTTTAAGAATAGTTTTTGCTGTGCTTTCTGTAGTAAATAGAGTTAGGCAGGGATACTCACCATTGTCATTTCAGACCCGCCTCCCAGCCCCGAGGGGACCCGACAGGCCCGAAGGAATCGAAGAAGAAGGTGGAGAGAGAGACAGAGACAGATCAAGACCATTAGTGGCTGGATTCTTAGCACTCATCTGGGACGACCTGTGGAGCCTGTGCCTCTTCAGCTACCACCACTTGAGAGACTCACTCTTGATTGTAGCGAGGATTGTGGAACTTCTGGGACACAGGGGGTGGGAAGCCCTCAAATATTGGTGGAATCTCCTGCAGTATTGGATTCAGGAACTAAAGAATAGTGCTGTTAGCTTGCTTAATGCCACAGCTATAGCAGTAGCTGAAGGGACAGATAGGGTTATAGAAGTAGTACAAAGAACTTTTAGAGCTATTCTCCACATACCTACAAGAATAAGACAGGGCTTAGAAAGGCTTTTGCTATAAGATGGGTGGCAAATGGTCAAAACGTAGTATGGGTGGATGGACTACTGTAAGGGAAAGAATGAAACGAGCTGAGCCTGAGCCAGCAGCAGATGGGGTAGGACCAGCATCTCGAGACTTGGAAAAATATGGAGCAATCACAAGTAGCAATACAGCAGCTACTAATGCTGATTGTGCCTGGCTAGAAGCACAAGAGGAGGAGGAGGTGGGTTTTCCAGTCAGACCTCAAGTACCTTTAAGACCAATGACTTACAAGGCAGCTGTAGATCTTAGCCACTTTTTAAAAGAAATGGGGGGACTGGAAGGGCTAATTTACTCCCAAAAGAGACAAGATATCCTTGATTTGTGGGTCCACCACACACAAGGCTACTTCCCTGATTGGCAGAACTACACACCAGGGCCAGGGATCAGGTACCCACTGACCTTTGGATGGTGCTTCAAGCTAGTACCAGTTGAGCCAGAGAAGGTAGAAGAAGCCAACGAAGGAGAGACCAACAATTTGTTACATCCTATGAGCCTGCATGGAATGGAAGACCCGGAGGGAGAAGTATTAATGTGGAAGTTTGACAGCCGCCTAGCATTCCGTCACATGGCCCGAGAGCTGCATCCGGAGTACTACAAAGACTGCTGACATCGAGTTTTCTACAAGGGACTTTCCGCTGGGGACTTTCCAGGGAGGTGTGGTCTGGGCGGGACCGGGGAGTGGCAAACCCTCAGATGCTGCATATAAGCAGCTGCTTTTCGCCTGTGCTGGGTCTCTCTGGTTAGACCAGATCAGAGCCTGG
>A1.UA.00.98UA0116.AF413987_C.ZA.04.04ZAPS190B1.DQ093602
TGGATGGGTTAATCTACTCCAAGAAAAGACAAGAAATCCTTGATCTGTGGGTCTATCACACACAAGGTTACTTCCCTGATTGGCAGAATTATACCCCAGGGCCAGGGATTAGATTCCCACTAACATTTGGGTGGTGCTACAAGCTAGTACCAGTTGACCCAGCTGACGTAGAAGAGGCCACAGAGGGAGAGAACAACAGCCTATTACACCCTATATGCCAACACGGAATGGATGATGAGGAAAAAGAAGTGTTAATGTGGAAGTTTGACAGTCGCCTGGCTCTAACACACAGAGCCCGAGAGCTGCATCCGGAGTTTTACAAAGACTGCTGACACAGACTGCTGACATGAAGTTGCTGACAGGGACTTTCCGCGGGGACTTTCCAGGGGAGGTGTGGTTTGGGCGGAGTCGGGGAGTGGCTAACCCTCAGATGCTGCATATAAGCAGCTGCTTTTCGCCTGTACTGGGTCTCTCCGGTTAGACCAGATCGAGCCTGGGAGCTCTCTGGCTAGCTAGGGAACCCACTGCTTAAGCCTCAATAAAGCTTGCCTTGAGTGCTTTAAGTAGTGTGTGCCCGTCTGTTGTATGACTCTGGTAACTAGAGATCCCTCAGACTACTCTAGGCAGTGTAAAAATCTCTAGCAGTGGCGCCCGAACAGGGACTCGAAAGCGAAAGTTCCAGAGAAGTTCTCTCGACGCAGGACTCGGCTTGCTGAGGTGCACACAGCAAGAGGCGAGAGCGGCGACTGGTGAGTACGCCTAAGGATTTTTGACTAGCGGAGGCTAGAAGGAGAGAGATGGGTGCGAGAGCGTCAGTATTAAGCGGGGGAAAATTAGATGCATGGGAAAAAATTCGGTTAAGGCCAGGGGGAAAGAAAAAATATAGAATAAAACACCTAGTATGGGCAAGCAGGGAGCTGGAAAGATTCGCGCTTAACCCTAGCCTTCTAGAAACATCAGAAGGATGTCAACAAATACTGGAACAGTTACAACCAACTCTCAAGACAGGATCAGAAGAAGTTAAATCATTATATAATACAGTAGCAACTCTCTATTGTGTACATCAACGGATAGAGATAAAAGACACCAAGGAAGCTTTGGATAAAATAGAGGAGATACAAAATGAGAACAAGCAAAAGACCCAACAGGCAACTGGCACAGGAAGCAGCAGCAAAGTCAGTCAAAATTACCCCATAGTGCAAAATGCACAAGGGCAAATGACACACCAGTCCATGTCACCTAGGACTTTAAATGCATGGGTGAAAGTAATAGAAGAAAAGGCTTTCAGCCCAGAAGTAATACCCATGTTTTCAGCATTGTCAGAGGGAGCCACCCCACAAGATTCAAACATGATGCTGAACATAGTGGGGGGACACCAGGCAGCTATGCAAATGTTGAAAGATACCATCAATGAGGAAGCTGCTGAATGGGATAGGTTACATCCAGCACAGGCAGGGCCTTTTCCACCAGGGCAGATGAGAGAACCAAGGGGAAGTGACATAGCAGGAACTACTAGTACCCTTCAAGAACAAATAGGATGGATGACAAGCAACCCACCTATCCCAGTGGGAGACATCTATAAAAGATGGATAATCCTAGGATTAAATAAGATAGTAAGAATGTATAGCCCTGTTAGCATTTTAGACATAAGACAAGGGCCAAAAGAACCCTTCAGAGACTATGTAGATAGGTTCTTTAAAACTCTTAGAGCTGAGCAAGCTACACAGGAGGTAAAGAACTGGATGACAGAAACCCTGCTGGTCCAAAATGCAGATCCAGATTGTAAAGCCATTTTAAGAGCATTAGGACCAGGGGCTACATTAGAAGAAATGATGACAGCATGCCAGGGAGTGGGAGGACCCGGCCATAAAGCCAGGGTTTTGGCTGAGGCCATGAGTCAAGTACAAAATGCAAACATAATGATGCAGAAAAGTAATTTTAGGGGCCCAAAAAGAATTAAGTGTTTCAACTGTGGCAAAGAAGGACACCTAGCCAGAAATTGCAGGGCCCCTAGGAAAAAGGGCTGTTGGAAATGTGGAAAGGAAGGCCATCAAATGAAAAACTGCACTGAGAGACAGGCTAATTTTTTAGGAAGAATTTGGCCTTCCAGCAAAGGGAGGCCAGGAAATTTTCCTCAGAGCAGACCAGAGCCATCAGCCCCACCAGCAGAAGACTTTGGGAGGGGGGAAGAGATAACCCCCCCCCTGAAACAGGAACAGAAAGACAGGGAACAGCATCCTCCTTCAATTTCCCTCAAATCACTCTTTGGCAACGACCCCTTGTCACAGTAAGAATAGGAGGACAGCTAAAAGAAGCTCTATTAGATACAGGAGCAGATGATACAGTATTAGAAGACATAGATTTGCCAGGAAAATGGAAACCAAAAATGATAGGGGGAATTGGAGGTTTTATCAAGGTAAGACAGTATGATCAAATACTTATAGAAATTTGTGGAAAAAAGGCTATAGGTACGGTATTAGTAGGACCTACCCCTGTCAACATAATTGGAAGAAATATATTGACTCAGCTTGGTTGTACTTTAAATTTTCCAATAAGTCCTATTGAAACTGTACCAGTAACATTAAAGCCAGGAATGGATGGCCCAAAGGTTAAACAATGGCCATTAACAGAGGAGAAAATAAAAGCATTAACAGAGATTTGTATGGAGATGGAAAAGGAAGGAAAAATTTCAAAAATTGGGCCTGAAAATCCATACAATACTCCAGTATTTGCTATAAAGAAAAAGGACAGCACTAAGTGGAGGAAATTAGTAGATTTCAGGGAGCTCAATAAAAGAACTCAGGACTTTTGGGAAGTTCAATTAGGAATACCCCATCCAGCGGGTTTAAAAAAGAAAAAATCAGTAACAGTACTAGATGTGGGGGATGCATATTTTTCAGTTCCTTTAGATGAAAGCTTCGGAAAGTATACTGCATTCACTATACCAAGTATAAACAATGAGACACCAGGGGTCAGATATCAGTACAATGTACTTCCACAGGGATGGAAAGGATCACCATCAATATTCCAGAGTAGCATGACAAAAATCTTAGAGCCCTTTAGATCAAAAAATCCAGAAATAGTTATCTATCAATACATGGATGACTTGTATGTAGGCTCTGATTTAGAAATAGGGCAGCATAGAACAAAAATAGGGGAGTTAAGAGCTCATCTATTGAGCTGGGGATTTACTACACCAGACAAAAAGCATCAGAAAGAACCTCCATTTCTTTGGATGGGACATGGACTCCATCCTGACAAATGGACAGTCCAGCCTATAATGCTGCCAGATAAAGACAGCTGGACTGTCAATGATATACAGAAATTAGTGGGAAAACTAAATTGGGCAAGTCAGATTTATCCAGGGATTAAAGTAAGGCAATTGTGTAAACTCCTCAGGGGAGCCAAAGCACTGACAGATATAGTGACACTGACTGAGGAAGCAGAATTAGAATTGGCAGAGAACAGAGAGATTCTAAAAGAACCTGTGCATGGAGTATATTATGACCCATCAAAAGATTTAGTAGCAGAGATACAGAAACAAGGACAAGACCAATGGACATATCAAATTTATCAGGAGCCATTTAAGAATCTAAAAACAGGAAAATATGCAAAAAAGGGGTCTGCTCACACTAATGATGTAAAACAATTAACAGCAGTGGTGCAAAAAGTGGCCACAGAAGGCATAATAATATGGGGAAAGACTCCTAAATTTAGGCTACCCATACAAAAAGAAACATGGGAAGCATGGTGGATGGAGTACTGGCAGGCTACCTGGATTCCTGAATGGGAGTTTATCAATACCCCTCCTCTAGTAAAACTATGGTACCAGCTGGAGAAAGAACCCATAGTAGGAGCAGAGACTTTCTATGTAGACGGGGCAGCTAACAGGGAGACTAAGACAGGAAAAGCAGGGTATGTTACTGACAGAGGAAGACAAAAGGTTGTTCCTCTAACTGAGACAACAAATCAAAAGACTGAATTACATGCAATCCATCTAGCTTTGCAGGATTCAGGGTCAGAAGTAAATATAGTAACAGACTCACAATATGCATTAGGGATTATTCAGGCACAACCAGACAGGAGTGAATCAGAGATAGTCAATAAAATAATAGAGAAACTAATAGAAAAAGAAAGAGTCTACCTGTCATGGGTACCAGCGCACAAGGGAATTGGAGGAAATGAACAAGTAGATAAATTAGTCAGTTATGGAATCAGGAGGGTGTTATTTTTAGAAGGGATAGATAAGGCTCAAGAAGAACATGAAAAATATCACAGCAATTGGAAAGCAATGGCTAGTGATTTTAATCTGCCACCTATAGTAGCAAAGGAAATAGTAGCCAGCTGTGATAAATGTCAACTAAAAGGGGAAGCTATGCATGGACAGGTAGACTGTAGTCCAGGGATATGGCAATTAGATTGCACACATCTAGAAGGAAAAGTAATCATAGTAGCAGTCCATGTAGCCAGTGGCTATATAGAAGCAGAAGTTATCCCAGCAGAAACAGGACAGGAGACAGCATACTTTCTGCTAAAATTAGCAGGAAGATGGCCAGTAAAAGTAGTACACACAGATAATGGCCCCAATTTCACCAGCAGCGCAGTTAAGGCTGCCTGTTGGTGGGCAAATATCCAACAGGAATTTGGGATTCCCTACAATCCCCAAAGTCAAGGAGTAGTGGAGTCTATGAATAAGGAATTAAAGAAAATCATAGGGCAGGTAAGAGAGCAAGCTGAACACCTTAAGACAGCAGTACAAATGGCAGTATTCATTCACAATTTTAAAAGAAAAGGGGGGATTGGGGGGTACAGTGCAGGGGAAAGAATAATAGACATAATAGCAACAGACATACAAACTAAAGAATTACAAAAACAAATTATAAAAATTCAGAATTTTCGGGTTTATTACAGGGACAGCAGAGATCCAATTTGGAAAGGACCAGCAAAACTACTCTGGAAAGGTGAAGGGGCAGTGGTAATACAGGACAATAACGATATAAAAGTAGTACCAAGAAGAAAAGCAAAGATCATTAGGGATTATGGAAAACAGATGGCAGGTGATGATTGTGTGGCAAGTAGACAGGATGAGGATTAGAACATGGAACAGTTTAGTAAAACATCATATGTATGTCTCAAAGAAAGCTAGAGGGTGGTTTTATAGACATCACTATGAAAGCAGGCATCCAAAAGTAAGTTCAGAAGTACACATCCCACTAGGGGATGCTAGGCTAGTAGTAAAAACATACTGGGGTCTGCATACAGGAGAAAAAGACTGGCACTTGGGCCATGGGGTCTCCATAGAATGGAGACAGGAAAGGTGTAGCACACAAATAGACCCTGACCTGGCGGACCAACTAATTCATCTGTATTATTTTGACTGTTTTTCAGACTCTGCCATAAGGAAAGCCATAGTAGGACACATAGTTAGCCCTAGGTGTAACTATCCAGCAGGACACAACAAGGTAGGATCTCTACAATACTTGGCACTGAAAGCATTAGTAACACCAACAAGGGAAAGGCCACCTTTGCCTAGTGTTAGGAAACTAACAGAGGAGAGATGGAACAAGCCCCAGAAGACCAGGGGCCGCAGAGGGAACCACACAATGAATGGATGTTAGAACTGTTAGAAGATCTTAAGCATGAAGCTGTCAGACATTTTCCAAGGCCGTGGCTCCATGGATTAGGACAACATATCTATAACACCTATGGGGATACTTGGGAAGGGGTTGAAGCTATAATAAGAACTTTGCAACAACTACTGTTTGTTCATTCCAGAATTGGGTGCCAACATAGCAGAATAGGCATTGTGCAAAGGAGAAGAGCCAGGAATGGATCCAGTAGATCCTAACCTAGAGCCCTGGAATCATCCGGGAAGTCAGCCTAAAACTGCTTGTAGCAATTGTTACTGTAAAAAGTGTTGCTTGTATTGCCAAATTTGCTTTCTAAAAAAAGGCTTAGGCATCTCCTATGGCAGGAAGAAGCGGAGACACAGACGCGGAACTCCTCACAGCAGTAAGGATCATCAAATTCCTATATCAAAGCAGTAAGTACTAAATAAATGTAATGACACCTTTAGAAATCTATGCAATAGTAGCATTAGTAGTAGTGTTTGTCATAGCAATAGTTGTGTGGACTATAGTAGGTATAGAATATAGGAAATTGCTAAAACAAAGAAAAATAGACAGGTTAATTGAGAGAATAAGAGAAAGAGCAGAAGACAGTGGCAATGAAAGCGAGGGGGATGCAGAGGAATTATCAACACTTATGGAGGTGGGGAACTATGCTCTTTTGGATGATAATAATGTGTAAGGCTGCAGAAAACTTATGGGTCACGGTATACTATGGGGTACCTGTGTGGAGAGATGCAGAGACCACCCTATTTTGTGCATCAGATGCTAAAGCATATGATAAAGAAGTACACAATGTCTGGGCTACACATGCCTGCGTACCCACAGACCCTGACCCACAAGAAATAATTTTGGAAAATGTGACAGAGAAATTTAACATGTGGAAAAATAACATGGTAGAACAAATGCAAACAGATATAATCAGTCTCTGGGACCAAAGCCTAAAGCCATGTGTAAAGTTAACCCCTCTCTGCGTTACTTTAAATTGTGCTGGACCCAGCTCTAACAACAGTAACGTTAACAGCAACAGCAACGATAACTGGTCTGAAGAAATGAAAAACTGCTCCTTCAACATGACCACAGAACTAAGAGATAAAAGGAAAACTGTACATTCACTTTTTTATAAACTTGATATAGTATCAACTGGTAGTAATGATAGTAGGCAGTATAGACTAATAAATTGTAATACATCAGCCATGACACAGGCCTGTCCTAAGGTAACCTTTGAGCCAATTCCTATACATTATTGTGCCCCAGCTGGTTTTGCGATTCTAAAGTGCAAGGATACAAATTTTACTGGAACAGGGCCATGCAAGGATGTCAGCACAGTACAATGCACACATGGAACCAAGCCAGTAGTATCAACTCAACTGCTGTTAAATGGCAGTCTAGCAGAGAAAGAGGTAATGATTAGATCTGAAAATATCACAGACAATGGCAAAATCATAATAGTACATCTTAATGACTCTGTAACAATTATGTGTACAAGACCCAACAATAATACCAGAACAAGTATAAGGATAGGACCAGGACAAACATTCTATGCAACAGGAGCTATAATAGGAGACATAAGACAAGCACATTGTAACATTAGCGAAGACAGTTGGAAAAAAACTTTAAAAGAGGTAAGTGAAAAATTCAAAGAACACTTCCCTAATAAAACAATAAAATTTGCACCACACTCAGGAGGGGACCCAGAAATTACAACACATAGCTTTAATTGTAGAGGAGAATTTTTCTATTGCGATACATCAAGCCTGTTTAATGCAACATATAATGGTACAGTCATATTTCATGATAATTCAAATTTTAATAATTCAACCATCACACTCCCATGCAGAATAAAACAATTTATAAACATGTGGCAGGGGGTAGGACGAGCAATGTATGCCCCGCCCATTGAAGGAAACATAACATGTACATCAAATATCACAGGACTACTATTGACACGTGATGGAGGAGTAGGTAATGGGACAGATAATACGATAGAAATATTCAGACCTGAAGGAGGAGACATGAGGGACAATTGGAGAAGTGAATTATATAAATATAAAGTGGTGGAAATTAAGCCATTGGGAGTAGCACCCACTGGGGCAAAAAGGAGAGTGGTGCAGAGAGAAAAAAGAGCAGTGGGAATGGGAGCTATGATCCTTGGGTTCTTGGCAACAGCAGGAAGCACTATGGGCGCGGCGTCAATAACGCTGACGGTACAGGCCAGACAAGTGTTGTCTGGTATAGTGCAACAGCAAAGCAATTTGCTGAGGGCTATAGAGGCGCAACAGCATATGTTGCAACTCACGGTCTGGGGCATTAAGCAGCTCCAGGCAAGAGTCTTGGCTATAGAAAGATACCTACAGGATCAGCAGCTCCTAGGGTTGTGGGGCTGCTCTGGAAAGCACATCTGCACCACTGATGTGCCTTGGAACTCCAGTTGGAGTAATAAAACTCAAACAGAAATTTGGAATAACATGACCTGGATGCAGTGGGATAAAGAAATTGACAATTACACACACACAATATACAGGTTGCTTGAAGCATCACAAACCCAGCAGGAACAGAATGAAAAAGATTTATTAGCATTGGACAGTTGGAACAGTCTGTGGAATTGGTTTAACATAACAAATTGGCTGTGGTATATAAAGTTATTCATAATGATAGTAGGAGGCTTGATAGGTTTAAGAATAATTTTTGCTGTGCTCTCTATAGTAAATAGAGTCAGGCAGGGATACTCACCTCTATCATTACAGACCCTCATCCCAAACCCGAGGGAACCCGACAGGCTCGGAAGAATCGAAGAAGAAGGTGGAGAGCAAGGCAGAGGCAGATCCATTCGATTAGTGAGCGGATTCTTGTCAATTGCCTGGGACGACCTACGGAGCCTGTGCCTCTTCAGCTACCACCGATTGAGAGACTTCATATTAGTAGCAGCGAGAGTGGGGGAACTTCTGGGACGCAGCAGTCTCAGGGGACTACAGAAGGGGTGGGAGACCCTTAAGTATCTGGGAAGTCTTATTCAATATTGGGGTTTAGAGCTAAAAAAGAGTGCTATTAGTCTGCTTGATACCATAGCAATAGCAGTAGCTGAAGGAACAGATAGGATAATAGACTTCATACAAAGAATTTGTAGAGCTATCTACAACCTACCTAGGAGAATAAGACAGGGTTTTGAAGCGGCTTTGCTATAAGATGGGGGGCAAGTGGTCAAAAAGCAGCATAGTTGGATGGCCTGCTGTAAGAGACAGAATGAGACGAGCTGAGCCAGCAGCAGAAGGAGTAGGACCAGCATCTAAAGATTTAGACAGGCATGGAGCACTTACAAGCAGCAACACAGCCACCAACAATGCTGATTGTGCCTGGCTGGAAGCACAAGAGGGGGCAGATGAAGTAGGCTTTCCAGTCAGACCTCAGGTGCCTTTAAGGCCAATGACTTATAAGGGTGCATTCGATCTCAGCTTCTTTTTAAAAGAAAAGGGGGGACTGGATGGGCTAATTTACTCTAAGAAAAGACAGGACATCCTTGATTTGTGGATCTATCACACACAAGGCTTCTTCCCTGATTGGCAAAACTACACACCGGGACCAGGGGCCAGGTTTCCACTGACCTTTGGATGGCTCTACAAGCTAGTGCCAGTCGACCCAAGGGAAGTAGAAGAGGCTAACAAAGGAGAAAACAACTGTCTGTTACACCCTATAAGCCAGCATGGAATGGAAGATGAAGACAGAGAAGTGCTACAGTGGCAGTTTGACAGCAGCCTAGCACGCAGACACATGGCCCGCGAGCTACATCCGGAGTATTACAAAGACTGCTGACACAGAAGGGACTTTCCGCTGGGACTTTCCACTGGGGCGTTCCAGGAGGAGTGGTCTGGGCGGGACGGGGAGTGGTCAACCCTCAGATGCTGCATATAAGCAGCTGCTTTTCGCCTGTACTGGGTCTCTCTAGGTAGACCAGATCTGAGCCCGGGAGCTCTCTGGCTGCTTAGGGAACCCACTGCTTAAGCCTCAATA
>A1.KE.00.KNH1144.AF457066_C.BW.00.00BW17835.AF443096
GCGAGAGCGTCAGTATTAAGTGGGGGAAAATTAGATAGATGGGAGAAAATTCGGTTAAGGCCAGGGGGAAAGAAAAAATATAGAATGAAACATCTAGTATGGGCAAGCAGGGAGCTGGAAAGATTCGCACTTAACCCTAGCCTTTTAGAAACAGCAGAAGGATGTCAGCAAATAATAGAACAGATACAACCAGCTCTCAAGACAGGAACAGAAGAACTTAGATCATTATTTAATACAATAGCAACCCTCTATTGCGTACATCAAAAGATAGATGTGAAAGACACCAAGGAAGCTCTAGATAAAATAGAGGAACTGCAAAATAAGAGCAAGCAAAAGACACAACAAGCAGCAGCTGATACAGGAAGTGGCAGCAAGGTCAGCGTCAGCCAAAATTACCCTATAGTGCAAAATGCACAAGGGCAAATGATACACCAGACTTTGTCACCTAGGACCTTGAATGCATGGGTAAAAGTAATAGAAGAAAAGGCTTTCAGCCCAGAAGTAATACCCATGTTTTCAGCATTATCAGAAGGAGCCACTCCACAAGATTTAAATATGATGCTGAACATAGTGGGGGGACACCAGGCAGCCATGCAAATGTTAAAGGATACCATCAATGAGGAAGCTGCAGAATGGGACAGGACACATCCAGTACATGCAGGGCCTATTCCACCAGGCCAGATGAGAGAACCAAGGGGAAGTGACATAGCAGGAACTACTAGCACCCCTCAAGAACAAATAGGATGGATGACAAGCAACCCACCTATCCCAGTGGGAGACATCTATAAAAGATGGATAATCTTGGGATTAAATAAAATAGTAAGAATGTATAGCCCTGTTAGCATTTTGGATATAAAACAAGGGCCAAAAGAACCCTTCAGAGATTATGTAGATAGGTTCTTTAAAACTCTCAGAGCTGAGCAAGCTACACAGGAGGTAAAAGGTTGGATGACAGAAACATTACTGGTCCAAAATGCAAATCCAGATTGTAAGTCCATTTTAAGAGCATTAGGAACAGGAGCTACATTAGAAGAAATGATGACAGCATGCCAGGGAGTGGGAGGACCCGGCCATAAAGCAAGGGTTTTGGCTGAGGCAATGAGTCAAGTACAACATACAAACATAATGATGCAAAGAGGCAACTTTAGGGGCCAGAAAAGAATTAAGTGTTTCAACTGTGGCAAAGAAGGACACCTAGCCAGAAATTGCAGGGCCCCTAGGAAAAAGGGCTGTTGGAAATGTGGGAAGGATGGACATCAAATGAAAGACTGCACTGAAAGACAGGCTAATTTTTTAGGGAAAATTTGGCCTTCCAGCAAGGGGAGGCCAGGAAATTTTCCTCAGAGCAGACCGGAACCAACAGCCCCACCAGCAGAGCTCTTTGGGATGGGGGAAGAGATAGCCTCCCCTCTAAAGCAGGAGCAGAAAGGCAAGGAACAGACTCCACCCTCAATCTCCCTCAAATCACTCTTTGGCAACGACCCCTTGTCACAGTAAAAATAGCGGGACAGCTAAGAGAAGCTCTATTAGATACAGGGGCAGATGATACAGTATTAGAAGACATAGATTTGCCAGGTAAATGGAAGCCAAAAATGATAGGGGGAATTGGAGGTTTCATCAAGGTAAAACAGTATGAGCAGGTACTTATAGAAATTTGTGGAAAAAAGGCTATAGGTACAGTATTAGTAGGACCTACACCTGTCAACATAATTGGAAGAAACATGTTGACCCAGATTGGTTGTACTTTAAATTTCCCAATTAGTCCTATTGAGACTGTACCAGTAAAATTAAAGCCAGGAATGGATGGCCCAAAGGTTAAACAATGGCCATTGACAGAAGAAAAAATAAAAGCATTAACAGAAATTTGCACAGAGATGGAAAAGGAAGGAAAAATTTCACAAATTGGACCTGAAAATCCATACAATACTCCAATATTTGCAATAAAGAAAAAAGATAGCACTAAATGGAGGAAATTAGTAGATTTCAGAGAGCTCAATAAAAGAACACAAGACTTTTGGGAAGTTCAATTAGGGATACCGCATCCAGCGGGCCTAAAAAAGAAAAAATCAGTAACAGTGCTAGATGTGGGGGACGCATATTTCTCAGTCCCTTTACATGAAGACTTTAGAAAGTATACTGCATTCACCATACCTAGTACAAACAATGAGACACCAGGAAAAAGGTATCAGTACAATGTGCTTCCACAGGGATGGAAAGGATCACCAGCAATATTCCAGAGTAGTATGACAAAAATCTTAGAGCCCTTTAGATCAAAAAATCCAGAAATAATTATCTATCAATACATGGATGACTTGTATGTAGGATCTGATTTAGAAATAGGGCAGCATAGAGCAAAAATAGAAGAATTAAGAGCTCATCTATTGAGCTGGGGATTTACTACACCAGACAAGAAGCATCAGAAAGAACCTCCATTCCTTTGGATGGGATATGAGCTCCATCCTGACAAGTGGACAGTCCAGCCTATAGAGCTGCCAAACAAAGAAAGCTGGACTGTCAATGATATACAGAAATTAGTGGGGAAACTAAATTGGGCTAGTCAAATTTATGCAGGAATTAAAGTAAAGCACTTGTGTAGACTTCTCAGGGGAGCCAAAGCACTAACAGATGTAGTAACATTGACTGAGGAAGCAGAATTAGAGTTGGCAGAAAACAAGGAGATTCTAAAAGAACCTGTGCATGGAGTATATTATGACCCATCAAAAGAACTAATAGCAGAAGTACAGAAACAAGGGCAAGACCAATGGACATACCAAATCTATCAAGAGCCATTTAAAAATCTAAAAACAGGGAAATATGCAAGACAAAGGTCTGCTCACACTAATGATGTAAAACAATTAGCAGAAGTGGTACAAAAAATAGCCATGGAAGGCATAGTAATATGGGGAAAGACTCCTAAATTTAGACTACCCATACAAAAAGAGACATGGGAAACATGGTGGAGGGACTATTGGCAGGCTACCTGGATTCCCGAATGGGAATTTGTCAATACCCCTCCTTTAGTAAAATTGTGGTACCAATTAGAGAAAGACCCCATAGTAGGAGCAGAGACTTTCTATGTAGATGGAGCAGCCAATAGGGAGACTAAGCTAGGAAAAGCAGGGTATGTCACTGACAGGGGAAGACAAAAGGTTGTTTCCCTGACTGAGACAACAAATCAAAAAACTGAACTACATGCAATCTATCTAGCCTTGCAAGATTCAGGATCAGAAGTAAACATAGTAACAGACTCACAGTATGCATTAGGAATCATTCAGGCACAACCAGACAAGAGTGAATCAGAGTTAGTCAATCAAATAATAGAGAAGCTAATAGGAAAGGACAAAGTCTACCTGTCATGGGTACCAGCACACAAGGGAATCGGAGGAAATGAAAAAGTAGATAAATTAGTCAGTAACGGAATCAGGAAGGTGCTGTTTTTAGATGGGATAGATAAAGCTCAAGAAGAACATGAAAGATATCACAGCAATTGGAGAGCAATGGCTAGTGATTTTAATCTACCACCTATAGTAGCAAAGGAAATAGTAGCCTGCTGTGATAAATGTCAGCTAAAAGGAGAAGCCATACATGGACAAGTAGACTGCAGTCCAGGGATATGGCAATTAGATTGTACACATCTAGAAGGAAAAATAATTTTGGTAGCAGTCCATGTAGCCAGTGGCTATATAGAAGCAGAAGTTATCCCAGCAGAAACAGGACAAGAGACAGCATACTTTATACTAAAATTAGCAGGAAGATGGCCAGTAAAAGTAATACACACAGACAATGGCAGCAATTTCACCAGCGCTGCAGTTAAAGCAGCCTGTTGGTGGGCAGATATCCAGCAGGAATTTGGAATTCCCTACAACCCCCAAAGTCAAGGAGTAGTAGAATCTATGAATAAGGAATTAAAGAAAATCATAGGACAGGTAAGAGAGCAAGCTGAACACCTTAAAACAGCAGTACAAATGGCAGTATTCATTCACAATTTTAAAAGAAAAGGGGGGATTGGGGGGTACAGTGCAGGGGAAAGAATAATAGATATAATAGCAACAGACATACAAACTAAAGAATTACAAAAACACATTACAAAAATTCAAAATTTTCGGGTTTATTACAGGGACAGCAGAGATCCAGTTTGGAAAGGACCAGCAAAACTACTTTGGAAAGGTGAAGGGGCAGTAGTAATACAGGACAATAGTGATATAAAGGTAGTACCAAGAAGAAAAGCAAAAATCATCAGGGATTATGGAAAACAAATGGCAGGTGATGATTGTGTGGCAGGTAGACAGGATGAGGATTAGAACATGGAACAGTTTAGTAAAACATCATATGTATGTATCAAAGAAAGCAAAAAATTGGGTCTATAGGCATCACTTTGAAAGCAGAAATCCAAGAGTAAGTTCAGAAGTACACATCCCACTAGGGGATGCTAAACTAGTAGTAAGAACATATTGGGGTCTGCATCCAGGAGAAAATGACTGGCATTTGGGTCATGGGGTCTCCATAGAATGGAGGCTAAAAAGTTACAGCACACAAGTAGATCCTGACCTGGCAGACCAACTAATTCATCTGTATTATTTTGACTGTTTTTCAGGCTCTGCCATAAGGAAAGCCATATTAGGAGAATTAGTTAGCCCTAGATGTGAATATCAAACAGGACACAGCAAGGTAGGATCTCTACAATATTTAGCACTGAAAGCATTAGTAACACCACAAAAGACAAAGCCACCTTTGCCTAGTGTTAGGATATTAGCAGAGGATAGATGGAACAAGCACCAGAAGACCAGGGGCCCCAGAGAGAGCCATACAATGAATGGATGTTAGAGCTGTTAGAAGATCTTAAGCATGAAGCTGTTAGACACTTTCCTAGGCCATGGCTTCATGGATTAGGACAACACATCTATGACACCTATGGGGATACTTGGGAAGGAGTTGAAGCTATAATAAGAACTCTGCAACAACTACTGTTTGTTCATTTCAGAATTGGGTGTCAACATAGCAGAATAGGCATTATTCGGGGAAGAAGAGGCAGGAATGGATCCAGTAGATCCTAACCTAGACCCCTGGAACCACCCGGGAAGTCAGCCTACAACTCCTTGTAACAAGTGTTACTGTAAAAAGTGTTGCTATCATTGCCAGTATTGCTTTTTGAACAAAGGCTTAGGCATCTCCTATGGCAGGAAGAAGCGGAGACAGCGACGAGGAACTCCTCACAGCAGTAAGGATCATCAAAATCCTCTACCAAAGCAGTAAGTATTAGTAATTAGTATATGTAATGTTGCCTCCTTTACATATCTGTGCAATAGTAGGACTGATAGTAGCGGCAATCCTAGCAATAATTGTGTGGACTATAGTAGGTATAGAATATAGGAAACTGTTAAAACAAAGGAAAATAGACAGGTTAATTGAGAGAATAAGAGAAAGAGCAGAGGACAGTGGCAATGAGAGTGATGGGGACACAGATGAATTGTCAGCACTTATTGAGATGGGGAACTATGATCTTGGGATTGATAATAATCTGTAATGCTGTAAACAGCAACTTGTGGGTTACTGTCTATTATGGGGTACCTGTGTGGAAAGATGCAGAGACCACCTTATTTTGTGCATCAGATGCTAAAGCATATAAAACAGAAAAGCATAATGTCTGGGCTACACATGCCTGTGTGCCCACAGACCCCAACCCACAAGAAATACCTTTGGAAAATGTGACAGAAGAGTTTAACATGTGGAAAAATAAAATGGTAGAACAAATGCATACAGATATAATCAGTCTATGGGACCAAAGCCTACAGCCATGTGTAAAGTTAACCCCTCTCTGCGTTACTTTAAATTGTACAGATGTTACTAATGTTACAGATGTTAGTGGTACGAGGGGCAACATCACCATCATGAAAGAGATGGAGGGAGAAATAAAAAACTGTTCTTTCAATATGACCACAGAAATAAGGGATAAGAAACAGAAAGTATATTCACTCTTTTATAGACTTGATGTAGTACCAATAAATCAGGGTAATAGTAGTAGTAAAAACAGTAGTGAGTATAGATTAATAAGTTGTAATACCTCAGCCATTACACAAGCTTGCCCAAAGGTAAGCTTTGAGCCAATTCCCATACATTATTGTGCCCCAGCTGGTTTTGCGATCCTGAAGTGTAGGGATAAGGAGTTCAATGGAACAGGGGAATGCAAGAATGTTAGCACAGTACAGTGTACACATGGAATTAAGCCAGTGGTATCAACTCAACTACTGTTAAATGGTAGTTTAGCAGAAGAAGAGATAATAATTAGATCTGAAAACCTGACAAACAATGTCAAAACAATAGTAGTACATCTTAATGAATCTATACAAATTAACTGTACTAGACCTGGTAATAATACAAGAAAAAGTGTGAGGATAGGACCAGGACAAACATTCTATGCAACAGGGGACATAATAGGAGATATAAGACAAGCACATTGTAACATTAGTGAAAAGGCATGGAATAAAACTTTACACAGGGTAAGTGAAAATTAAAAGAACACTTCCCTAATAAAACAATAAAATTTACATCACCCTCAGGAGGGGACCTAGAAATTATACAACATACCTTTAATTGTGGAGGGGAGTTTTTCTATTGTAATACATCAAAACTGTTTAATGGTACATACAATGGTACATCCATCAGTACGGACAGTAACTCAAGCATCACACTCCAATGCAGAATAAAACAAATTATAAACATGTGGCAGGGGGTAGGACAAGCAATATATGCCCCTCCCATTGCAGGAAACATAACATGTAAATCAAATATCACAGGACTACTATTGACACGTGATGGAGGGAATAACACAGAGAACACAGAGACATTCAGACCTGGAGGAGGAGACATGAGGGATAATTGGAGAAATGAATTATATAAATATAAAGTAGTAGAAATTAAGCCATTAGGAATAGCACCCACTAGTGCAAAAAGGAGAGTGGTGGAGAGAGAAAAAAGAGCAGTAGGGATAGGAGCTGTGTTCCTTGGGTTCTTGGGGGCAGCAGGAAGCACTATGGGCGCGGCGTCAATAACGCTGACGGTACAGGTCAGACAATTGTTGTCTGGTATAGTGCAACAGCAAAACAATTTGCTGAGGGCTATAGAGGCGCAACAGCATATGTTGCAACTCACAGTCTGGGGCATTAAGCAGCTCCAGGCAAGAGTCCTGGCCATAGAAAGATACCTAAAGGATCAACAGCTCCTAGGGATTTGGGGCTGCTCTGGAAAACTCATCTGCACCACTGCTGTGCCTTGGAACACTAGTTGGAGCAATAAATCTCAAAATGATATTTGGGACAACATGACCTGGATGCAGTGGGATAGAGAAATTAGCAATTACACAGGCATTATATACAATTTGCTTGAAGAATCGCAAATCCAGCAGGAAAAGAATGAAAAGGATTTACTAGCATTGGACAGTTGGAATAATCTGTGGAATTGGTTTACCATAACAAATTGGCTGTCGTATATAAAAATATTTATAATGATAGTAGGAGGCTTGATAGGTTTAAGAATAATTTTTGCTGTGCTTTCTTTAGTGAATAGAGTTAGGCAGGGATACTCACCTTTGTCGTTTCAGACCCTTATCCCAAACCCGAGGGGACCCGACAGGCTCGAAAGAATCGAAGAAGAAGGTGGAGAGCAAGACAGAGACAGATCCATTCGATTAGTGAGCGGATTCTTAGCACTTGCCTGGGACGATCTACGGAGCCTGTGCCTTTTCAGCTACCACCGATTGAGAGACTTCATATTGGTGACAGCAAGAGCAGTGGAACTTCTGGGACGCAGCAGTCTCAGGGGACTACAGAGGGGGTGGGAAATCCTTAAATACCTGGGGACTCTTGTGCAGTATTGGGTTCTAGAGCTAAAAAAGAGTGCTATTAGTCTGCTTGATGCAACAGCAATAACAGTAGCTGGGGGAACAGATAGAATTATAGAATTGATACAAAGAATTGGTAGAGCTATCCTCAGCATACCTAGAAGAATAAGACAGGGCTTTGAAGCAGCTTTGCAATAAAATGGGGAACAAGTGGTCAAAAAGCTGGCCTGCTATAAGAGAAAGAATAAGACGAACTAATCCAGCAGCAGAGAGAACAAGAGCAGCAGAGGGAGTAGGAGCAGCGTCTCGAGACTTAGATAAACATGGGGCACTGACAAGCAGCAACACACCCGCCACTAATGCTGACTGTGCCTGGCTGGAAGCGCAAGAGGAGGAAGAAGAAGTAGGCTTTCCAGTCAGACCTCAGGTACCTGTAAGACCAATGACTTATAAGGCAGCATTCGATCTCAGCTTCTTTTTAAAAGAAAAGGGGGGACTGGAAGGGTTAATTCACTCCAAGCAAAGGCAAGACATCCTTGATTTGTGGGTCTATAACACACAAGGCTACTTCCCTGATTGGCAAAACTACACACCGGGACCAGGGGTCAGATATCCACTGACCTTTGGATGGTGCTTCAAGCTAGTGCCCGTTGACCCAAGGGAAGTGGAAGAGGCCAACGAAGGAGAGAACAACTGTTTGCTACACCCTATGAGCCAGCACGGAATGGAGGATGCAGACAAAGAAGTATTACAGTGGAAGTTTGATAGCAGCCTAGCACGCAGACACATGGCCCGCGAGCTACATCCGGAGTATTACAAAGACTGCTGACACAGAAGGGACTTTCCGCTGGGACTTTCCACTGGGGCGTTCCAGGGGTGTGGTCTGGGCGGGACTGGGGAGTGGCCAGCCCTCAGATGCTGCATATAAGCAGCTGCTTTTCGCCTGTACTGGGTCTCTCTAGGTAGACCAGATCTGAGCCTGGGAGCTCTCTGGCGACCTAGGGAACCCACTGCTTAAGCCTCAATAAAGCTTGCCTTGAGTGCTCAAAGTAGTGTGTGCCCATCTGTTGTGTGACTCTGGTAACTAGAGATCCCTCAGACC
>A1.RU.00.RU00051.EF545108_D.UG.99.99UGA08483.AY304496
CTCGGCTTGCTGAGGTGCCACAGCAAGAGGCGAGAGCGGCGACYGGTGAGTACGCCTAAAGATTTTTGACTAGCGGAGGCTAGAAGGAGAGAGATGGGTGCGAGAGCGTCAATATTAAGTGGGGGAAAATTAGATGCATGGGAGAAAATTCGGTTAAGGCCAGGGGGAAGGAAACAATATAGACTAAAACACCTAGTATGGGCAAGCAGGGAGCTGGAAAGATTCGCGCTTAACCCGAGCCTTTTAGAAACATCAGAAGGATGTCAACAAATACTAGAACAGTTACAACCAGCTCTCAGGACAGGGTYAGAAGAACTTAAATCATTATATAACACARTAGCAACCCTCTATTGCGTACATCTACGGATAGATGTAAAAGACACCAAGGAAGCTTTAGATAAAATAGAGGAAATACAAAATAAGAGCAAGCAAAAGACCCAACAGACAGCAACTGGCGCAGGAAACAGCAACAAGGTCAGTCAAAATTACCCTATAGTGCAAAATGCACAAGGGCAAATGGTAYATCAGTCCCTRTCACCTAGGAYTTTGAATGCATGGGTRAAAGTAATAGAAGAAAAGGCTTTCAGCCCAGAAGTAATACCCATGTTCACAGCATTATCAGAAGGAGCCACCCCACAAGATTTAAAYATGATGYTGAACATAGTGGGGGGACACCAGGCAGCTATGCAAATGTTGAAAGATACCATCAATGAGGAAGCTGCTGAATGGGATAGGTTACATCCCGCACAGGCAGGGCCTTTTCCACCAGGGCAGCTGAGAGAACCAAGGGGAAGTGATATAGCAGGAACAACTAGTACCCTTCAAGAACAAATAGGATGGATGACAAGCAATCCACCTATCCCAGTGGGAGACATTTATAAAAGATGGATAATCCTAGGATTAAATAAAATAGTAAGAATGTACAGTCCTGTCAGCATTCTAGACATAAGACAAGGACCAAAAGAACCCTTCAGAGATTATGTAGATAGGTTCTTTAAAACTCTCAGAGCTGAGCAAGCTACACAGGAGGTAAAGAACTGGATGACAGAAACCCTGCTGGTTCAAAATGCGAATCCAGATTGTAAGACCATTTTAAGAGCATTAGGAGCAGGGGCTACATTAGAGGAAATGATGACAGCATGCCAGGGAGTGGGAGGGCCCGGCCATAAAGCAAGGGTTTTGGCTGAGGCAATGAGTCACGTACAAAATACAAATATAATGATGCAGAAAGGCAATTTTAGGGGCCCCCCGAAAAGAATTAAGTGYTTCAACTGTGGCAAAGAAGGACACCTAGCCAGAAAYTGCAGGGCCCCTAGGAAAAAGGGCTGTTGGAAATGTGGAAAGGAAGGCCATCAAATGAAAGACTGCACTGAGAGACAGGCTAATTTTTTAGGGAAAATTTGGCCTTCCAGCAARGGGAGGCCAGGRAATTTTCCTCAGAGCAGACCAGAGCCAACAGCCCCACCAGCAGAGAACTTTGGGATGGGGGAAGAGATAGCCCCCTCTCTGAAACAGGAGCAGAAAGACAGGGAACAGCCTCCTCCTTCAATTTCCCTCAAATCACTCTTTGGCAACGACCCCTTGTCACAGTAAAAATAGGAGGACAGCTAAAAGAAGCTTTATTAGATACAGGAGCAGATGATACAGTATTAGAAGACATAAATTTGCCAGGAAAATGGAAACCAAAAATGATAGGGGGAATTGGAGGTTTTATCAAGGTAAGACAGTATGATCAGATACTTATAGAAATTTGTGGAAAAAAGGCTATAGGTGCGGTATTAGTAGGACCTACTCCTGTCAACATCATTGGAAGAAATATGTTGACTCAACTTGGYTGTACTTTAAATTTTCCAATAAGTCCTATTGAAACTGTACCAGTAACATTAAAGCCAGGAATGGATGGCCCAAAGGTTAAACAATGGCCATTAACAGAAGAAAAAATAAGGGCATTAACAGACATTTGTAAGGAGATGGAAAAGGAAGGAAAAATTTCAAAAATTGGGCCTGAAAACCCATACAATACTCCAGTATTTGCTATAAAGAAAAAGGACAGCACTAAATGGAGGAAATTAGTAGATTTCAGGGAACTCAATAAAAGAACTCAGGACTTTTGGGAAGTTCAATTAGGAATACCACATCCAGCGGGTTTAAAAAAGAAAAAATCAGTAACAGTACTAGATGTAGGGGATGCATATTTTTCAGTTCCTTTAGATGAAAACTTTAGAAAGTATACTGCATTCACTATACCTAGTATAAACAATGAAACACCAGGGGTCAGATATCAGTACAATGTGCTGCCACAAGGATGGAAAGGATCACCATCAATATTCCAGTGTAGCATGACAAGAATCTTAGAGCCCTTTAGATCAAAAAATCCAGAAATAGTTATCTATCAATACATGGATGACTTGTATGTAGGCTCTGATTTAGAAATAGGGCAGCATAGAACAAAAGTAGAGGAGTTAAGGGCTCATCTATTGAGCTGGGGATTTGCTACRCCAGATARAAAGCATCAGAAAGAACCTCCATTTCTTTGGATGGGATATGAACTCCATCCTGACAAATGGACAGTCCAGCCTATAATGCTGCCAGATAAAGACAGCTGGACTGTCAATGATATACAGAAATTAGTGGGAAAACTAAATTGGGCCAGTCAGATTTATCCAGGGATTAAAGTAAGGCAACTGTGTAAACTCCTCAGAGGAGCCAAAGCGCTAACTGATATAGTAACACTAACTGAGGAAGCAGAATTAGAATTGGCAGAGAACAGGGAGATTCTAAAAGAACCTGTGCATGGAGTATATTATGACCCATCAAAAGATTTAGTAGCAGAAATACAGAAACAAGGGCAAGACCAATGGACATATCAAATTTATCAGGAGCCATTTAAAAACTTAAAAACAGGAAAATATGCAAAAAAGGGGTCTGCTCACACTAATGATGTAAAACAATTAACAGCAGTGGTGCAAAAAGTGGCCACAGAAAGCATAGTAATATGGGGAAAGACTCCTAAATTTAGACTACCCATACAAAGAGAAACATGGGAAGCATGGTGGATGGAGTACTGGCAGGCTACCTGGATTCCTGAATGGGAGTTTGTCAATACCCCTCCTCTAGTAAAGCTATGGTACCAGTTAGAGAAAGAACCCATAGTAGGAGCAGAGACTTTCTATGTAGATGGGGCAGCTAACAGGGAGACTAAGCTAGGAAAAGCAGGGTATGTTACTGACAAGGGAAGACAAAAGGTTGTCTCTCTAACTGAGACAACAAATCAAAAGACTGAATTACATGCAATTCATCTAGCTTTGCAGGATTCAGGATCAAAAGTAAATATAGTAACAGATTCACAGTATGCATTAGGAATTATTCAGGCACAACCAGACAGGAGTGAAGCAGAGATAGTCAATAAAATAATAGAAAAAYTAATAGAAAAAGAAAAAGTCTATCTGTCATGGGTACCAGCGCACAAGGGGATTGGAGGAAATGAACAAGTAGATAAATTAGTTAGTKCTGGAATCAGGAAGGTGTTATTTTTAGATGGGATAGATAAGGCTCAAGAAGACCATGAAAGATATCACAGTAATTGGAAAGCAATGGCTAATGATTTTAATCTACCACCTATAGTAGCAAAGGAAATAGTAGCCAGCTGTGATAAATGTCAACTAAAAGGGGAAGCCATACACGGACAAGTAGACTGTAGTCCAGGAATCTGGCAGTTAGATTGCACACATCTAGAAGGAAAAGTAATCCTGGTAGCAGTCCATGTAGCCAGTGGCTATATAGAAGCAGAAGTTATCCCAGCAGAAACAGGACAGGAGACAGCATACTTTCTGCTAAAATTAGCAGGAAGGTGGCCAGTAAAAGTAATACACACAGATAATGGCAGCAATTTCACCAGCAGTGCAGTTAAAGCTGCCTGTTGGTGGGCAAATATCCAACAGGAATTTGGGATTCCCTACAATCCCCAAAGCCAAGGAGTGGTGGAATCTATGAATAAGGAATTAAAGAAAATCATAGGGCAGGTAAGAGAGCAAGCTGAACACCTTAAGACAGCAGTACAAATGGCAGTATTCATTCACAATTTTAAAAGAAAAGGGGGGATTGGGGGGTACAGTGCAGGGGAAAGAATAATAGACATAATAGCAACAGATATACAAACTAGAGAATTACAAAAACAAATTACAAAAATCCAAAATTTTCGGGTTTATTACAGAGACAGCAGAGACCCAGTTTGGAAAGGACCAGCAAAACTACTCTGGAAAGGTGAAGGGGCAGTGGTAATACAGGACAATAGTGATATAAAGGTAGTACCAAGAAGAAAAGCAAAGATCATTAGGGATTATGGAAAACAGATGGCAGGTGATGATTGTGTGGCAAGTAGACAGGATGAGGATTAGAACATGGAACAGTTTAGTAAAACATCATATGTATGTGTCAGGGAAAGCTAGAGGGTGGCTTTATAGACACCACTATGAAAGCAGGCATCCAAGAGTAAGTTCAGAAGTACACATCCCACTAGGGGACGCTAGACTAGTAGTAAGAACATATTGGGGTCTGCATACAGGAGAAAAAGACTGGCAATTGGGTCATGGGGTCTCCATAGAATGGAGACAGAAAAGGTAYAGCACACAAATAGACCCTGACCTGGCAGACCAACTGATTCATCTGTATTATTTTGACTGTTTTTCAGACTCTGCCATAAGGAAAGCCCTATTAGGAGAAATAGTTAGACCTAGGTGTGAATATCAAGCAGGACACAACAAGGTAGGATCTCTACARTACTTGGCATTGAAAGCATTAGTAACACCAACAAGGGGAAGGCCACCTTTACCTAGTGTTAGGAAACTAACAGAGGATAGATGGAACAAGCCCCAGAAGACCAGGGGCCGCAGAGGGAACCATACAATGAATGGATGTTAGAACTGTTAGAAGAGCTTAAGCATGAAGCTGTCAGACATTTCCCTAGGCCGTGGCTCCATGGATTAGGACAACATATCTATAACACCTATGGGGATACTTGGGAAGGGGTTGAAGCTATAATAAGAATTTTGCAACAACTACTGTTTGTTCATTTCAGAATTGGGTGCCAACATAGCAGAATAGGCATTAATCGAAGGAGAAGAGTCAGGAATGGATCCAGTAGATCCTAATCTAGAGCCCTGGAATCATCCGGGAAGTCAGCCTAAAACTGCTTGTAGCAAATGTTATTGTAAAAAGTGTTGCTGGCATTGCCAAGTTTGCTTTYTGARCAAAGGCTTAGGCATCTCCTATGGCAGGAAGAAGCGGAAACGCAGACGAGGGACTCCTCACAGCAGTAAGGATCATCAAACTCCTATACCAAAGCAGTAAGTACTCAGTAGATGTAATGACACCTTTGGAAATCTATGCCATAATAGCACTGGTAGTAGCGCTTATCATAGCAATAGTTGTGTGGACTATAGTAGGTATAGAATATAGGAAATTGCTAAAACAAAGGAAAATAGACAGGTTAATTGAGAGAATAAGAGAAAGAGCAGAAGACAGTGGCAATGAAAGCGAGGGGGATGCAGAGGAAGTATCAACACTTATGGGGGTGGGGAACGATGCTTTTTTGGATGATAATAATGTGTAAAGCTACAGGAAACCTGTGGGTCACGGTATACTATGGGGTACCCGTGTGGAGAGATGCAGAGACCACCCTATTTTGTGCATCAGATGCTAAAGCATATGATCCAGAAGTACATAATGTCTGGGCTACACATGCCTGTGTACCCACAGACCCTGACCCACAAGAAATAACTTTGGACAATGTGACAGAAGAATTTAATATGTGGAAAAATAACATGGTAGAACAGATGCAAACAGATATAATTAGTCTATGGGACCAAAGCCTACAGCCATGTGTAAAGTTAACCCCTCTCTGCGTTACTTTAAATTGTCAAGAGATCAGCAATGTCACTAACTATAACAGTAGCATGTCTAACAGCAGCAGGTATGGAGAAATGAAAAACTGCTCTTTCAATATGACCACAGAATTAAGAGATAGGAAAAGAAAGGTACATTCACTTTTTTATAAACTTGATATAGTATCAACTAGTAGTAATGAGAGTGGACCGTATAGACTAATAAATTGTAATACATCAGCCATGACACAGGCCTGTCCTAAGGTGGTCTTTGAGCCAATTCCTATACATTATTGTGCCCCAGCTGGTTTTGCGATTCTAAAGTGCAACCAAAAAGATTTTAATGGAACAGGGCCATGCAGGAATGTCAGCACAGTACAATGCACACATGGAATCAAGCCAGTAGTATCAACTCAACTGCTGTTAAATGGCAGTCTAGCAGAGGGAAATGTAACGATTAGATCTGAAAATATCACAGACAATACCAAAACCATAATAGTACAGCTTAGTAAGCCTGTAAACATTACTTGTATCAGACCTGGCAACAATACAATACAAAGTGTACAGATGGGACCAGGGCGAGCATGGTATACATCAGGTATAACAATAATAGGAGATATAAGACAAGCACATTGTAACATTAGCGGAGCAAAATGGAATAATACTTTACAACAGGTAGCTAAAAAATTAGGAGGCCTTTTCAATAAGACAACAATAATTTTTAAACCATCCTCGGGAGGGGACCCAGAAATTACAACACACAGCTTTAATTGTGGAGGGGAACTTTTCTACTGCAATACATCAGGACTGTTTAATGGTGTATGGAAGAATAATACATCAGATAATGAAACGGTAAATGGAAGTGAGACAATAACAATCCCATGCAGAATAAAACAAATTATAAACACGTGGCAAGGAGTAGGAAGAGCAATGTATGCCCCTCCCATTAGAGGACTAATCCGATGTTCATCAAACATTACAGGACTATTGTTAACAAGAGATGGTGGTACAAATGGTGCTAGTCAGAAGGAGACCTTCAGACCCGGAGGAGGAGATATGAGAGACAATTGGAGAAGTGAATTATACAAATATAAAGTAGTAAAAATTGAACCATTAGGTCTAGCACCCACCAGGGCTAAAAGAAGAGTGGTGGAAAGAGAAAAAAGAGCAATAGGACTAGGAGCTATGTTCCTTGGGTTCTTGGGAACAGCAGGAAGCACGATGGGCGCAGTGTCACTGACGCTGACGGTACAGGCCAGACAGGTACTGTCTGGTATAGTGCAGCAGCAAAACAATTTGCTGAGGGCCATAGAGGCGCAACAGCATCTGTTGCAACTCACAGTCTGGGGCATTAAACAGCTCCAGGCAAGAGTCCTGGCTGTGGAAAGCTACCTAAGGGATCAACAGCTCCTAGGAATTTGGGGTTGCTCTGGAAAACACATTTGCACCACTAATGTGCCCTGGAACTCTAGCTGGAGTAATAAATCTCTAGATCAGATTTGGGGTAACATGACCTGGATAGAGTGGGAAAAAGAAATTGATAATTACACAGGCTTAATATACAGCTTACTTGAAGAATCGCAAGTCCAGCAAGAAAAGAATGAGCAAGAACTATTGCAATTGGACAAATGGGCAAGTTTGTGGAGTTGGTTTTCCATAACAAACTGGCTGTGGTATATAAGACTATTCATAATGATAGTAGGAGGCTTAATAGGGTTAAGAATAGTTTTTGCTGTGCTTTCTATAATAAATAGGGTTAGGCAGGGATATTCACCTCTGTCATTTCAGACCCTCCTCCCAGCCCCACGGGGACCCGAGCAGCCCGAAGGAATAGAAGAAGGAGGTGGAGAGCAAGGCAGAGGCAGATTCATTCGATTGGAGAACGGATTCTCAACACTTATCTGGGACGATCTGAGGAACCTGTGCCTCTTCAGCTACCACCGCTTGAGAGACTTACTCTTAATTGCAACGAGACTTGTGGAATTTCTGGGACGCAGGGGGTGGGAAGCTCTCAAATACCTGTGGAATCTCCTGCAGTATTGGCTTCAGGAACTAAAGAATAGCGCCATTAGCTTGCTTGATACAACAGCAATAACAGTAGCTGAGGGAACAGATAGGATTATAGAGATAGTACAAAGAGCTACTAGAGCTATTCTTAACATACCCACACGAATAAGACAGGGCTTGGAAAGGGCTTTACTATAAAATGGGTGGCAAATGGTCAAAGAGTAGTATAGTTGGATGGCCTGCTATAAGGGAAAGAATAAGAAGAGCTGATCCAGTAGCAGAAGGGGTGGGAGCCGCATCTCGGGACCTGGGAAGACATGGGGCAATCACAAGTAGTAATACAGCACATACCAATCCTGACTGTGCTTGGCTAGAAGCGCAAGARGAGGAAGGGGGTGTGGGATTTCCAGTCAGACCTCAGGTACCCTTAAGACCAATGACTTACAAGGCAGCTGTAGATCTGAGCCATTTTTTAAAAGAAAAGGGGGGACTGGAAGGGTTAATTTGGTCCCCGAAAAGACAAGAGATTCTTGATCTCTGGGTCTACCACACACAAGGCTTCTTCCCTGATTGGCAAAACTACACACCAGGGCCAGGGGTTAGATATCCACTAACCTTTGGATGGTGCTTTGAGCTAGTACCAGTTGAGACAAAGGAGGTAGAGGGAGAGAACAACTGCTTGTTACACCCTGTGTGCCAGCATGGAATAGAGGACTCGGAGAGAGAAGTGCTGATGTGGAGATTTAACAGCAGACTARCATTTGAACATMAGGCCCGAATACTGCATCCRGAATACTACAAAGACTGCTGACACCGAGCATTCTACAAGGGACTTTCCGCTGGGGACTTTCCAGGGAGGCGTGACGGGGGCGGGACTGGGAGTGGCTAACCCTCAGATGCTGCATATAAGCAGCTGCTTTTTGCCTGTACTGGGTCTCTCTTGTTAGACCAGATTTGAGCCTGAGAGCTCTCTGGCTAGCTAGGGAACCCACTGCT
>A1.UA.01.01UAPol303.DQ823360_D.UG.93.93UG_065.AY713418
GCGAGAGCGTCAGTATTAAGCGGGGGAAAATTAGATGAATGGGAAAAAATTCGGTTAAGGCCAGGGGGAAAGAAAAAATATAGAATAAAACACCTAGTATGGGCAAGCAGGGAGCTGGAAAGATTCGCGGTTAACCCCAGCCTTTTAGAAACATCAGAAGGATGTCAACAAATACTAGAACAATTACAACCAGCTCTCAAGACAGGATCAGAAGAACTTAAATCATTATATAATACAGTAGCAACCCTCTATTGTGTACATCAACGGATAGAGATAAAAGACACCAAGGAAGCCTTAGATAAAATAGAGGAAATACAAAATAAGAGCAAGCAAAAGACCCAACAGGCAGCAACTGGCACAGGAAGCAGCAGCAAGGTCAGTCAAAATTACCCCATAGTGCAAAATGCACAAGGGCAAATGACACACCAGTCCATATCACCTAGGACTTTGAATGCATGGGTGAAAGTAATAGAAGAAAAGGCTTTCAGCCCAGAAGTAATACCCATGTTTTCAGCATTGTCAGAAGGAGCCACCCCACAAGATTTAAACATGATGCTGAACATAGTGGGGGGACACCAGGCAGCTATGCAAATGTTGAAAGATACCATCAATGAGGAAGCTGCTGAATGGGATAGGTTACACCCAGCACAGGCAGGGCCTTTTCCACCAGGGCAGATGAGAGAACCAAGGGGAAGTGACATAGCAGGAACTACTAGTACCCTTCAAGAACAAATAGGATGGATGACAAGCAACCCACCTATCCCAGTGGGAGACATCTATAAAAGATGGATAATCCTAGGATTAAATAAGATAGTAAGAATGTATAGCCCTGTTAGCATTTTAGACATAAGACAAGGGCCAAAAGAACCCTTCAGAGACTATGTAGATAGGTTCTTTAAAACTCTTAGAGCTGAGCAAGCTACACAGGATGTCAAGAACTGGATGACAGAAACCCTGCTGATCCAAAATGCAAATCCAGATTGTAAAACCATTTTAAAAGCATTAGGATCAGGGGCTACATTAGAAGAAATGATGACAGCATGCCAGGGAGTGGGAGGACCCGGCCATAAAGCAAGGGTTTTGGCCGAGGCAATGAGTCAAGTACAAAATGCAAACATAATGATGCAGAAAAGTAATTTCAGGGGCCCAAAAAGAATTAAGTGTTTCAACTGTGGCAAAGAAGGACACCTAGCCAGAAATTGCAGGGCCCCTAGGAAAAAGGGCTGTTGGAAATGTGGAAAGGAAGGCCATCAAATGAAAGACTGCACTGAGAGACAGGCTAATTTTTTAGGGAAAATTTGGCCTTCCAGCAAAGGGAGGCCAGGAAATTTTCCTCAGAGCAGACCGGAGCCATCAGCCCCACCAGCAGAAAACTTTGGGATGGGGGAAGAGATAGCCCCCTCCCTGAAACAGGAACAGAAAGACAGGGAACAGCATCCTCCTTCAATTTCCCTCAAATCACTCTTTGGCAACGACCCCTTGTCACAATAAGAATAGGAGGACAGCTAAAAGAAGCTCTATTAGATACAGGAGCAGATGATACAGTACTAGAAGATATAAATTTGCCAGGAAAATGGAAACCAAAAATGATAGGGGGAATTGGAGGTTTTATCAAGGTAAGACAGTATGATCAGATACTTATAGAAATTTGTGGAAAAAAGGCTATAGGTACGGTATTAGTAGGGCCTACCCCTGTCAACATAATTGGAAGAAATATGTTGACTCAGCTTGGTTGTACTTTAAATTTTCCAATAAGTCCTATTGAAACTGTACCAGTAACATTAAAGCCAGGAATGGATGGCCCAAAGGTTAAACAATGGCCATTAACAGAAGAGAAAATAAAAGCATTAACAGACATTTGTAAGGAGATGGAAAAGGAAGGAAAAATTTCAAAAATTGGGCCTGAAAATCCATACAATACTCCAGTATTTGCTATAAAGAAAAAGGACAGCACTAAGTGGAGGAAATTAGTAGATTTCAGGGAGCTCAATAAAAGAACTCAGGACTTTTGGGAAGTTCAATTAGGAATACCCCATCCAGCGGGTTTAAAAAAGAAAAAATCAGTAACAGTGCTAGATGTGGGAGATGCATATTTTTCAGTTCCTTTAGATGAAAGCTTCAGAAAGTATACTGCATTCACTATACCAAGTATAAACAATGAGACACCAGGGATCAGATATCAGTACAATGTACTTCCACAGGGATGGAAAGGATCACCAGCAATATTCCAGTGTAGCATGACAAAAATCTTAGAGCCCTTTAGATTAAAAAATCCAGAAATAGTTATCTATCAATACATGGATGACTTGTATGTAGGCTCTGATTTAGAAATAGGGCAACATAGAATAAAAATAGAGGAGTTAAGAGCTCATCTATTGAGCTGGGGATTTACTACACCAGACAAAAAGCATCAGAAAGAACCTCCATTTCTTTGGATGGGATATGAACTCCATCCTGACAAATGGACAGTCCAGCCTATAATGCTGCCAGATAAAGACAGCTGGACTGTCAATGATATACAGAAATTAGTGGGAAAACTAAATTGGGCAAGTCAGATTTATCCAGGGATTAAAGTAAGGCAATTGTGTAAACTCCTCAGGGGAGCCAAAGCACTGACAGATATAGTGACACTGACTGAGGAAGCAGAATTAGAATTGGCAGAGAACAGAGAGATTCTAAAAGAACCTGTGCATGGAGTATATTATGACCCATCAAAAGATTTAGTAGCAGAAATACAGAAACAAGGACAAGACCAATGGACATATCAAATATATCAGGAGCCATTTAAGAATCTAAAAACAGGAAAATATGCAAAAAAGGGGTCTGCCCACACTAATGATGTAAAACAGTTAACAGCAGTGGTGCAAAAAGTGACCACAGAAAGCATAATAATATGGGGAAAGACTCCTAAATTTAGACTACCCATACAAAAAGAAACATGGGAAGCATGGTGGATGGAGTACTGGCAGGCTACCTGGATTCCTGAATGGGAGTTTGTCAATACCCCTCCTCTAGTAAAGCTATGGTACCAGTTGGAAAAAGAACCCATAGTAGGAGCAGAGACTTTCTATGTAGATGGGGCAGCTAACAGGGAAACTAAGATAGGGAAAGCAGGGTATGTTACTGACAGAGGAAGACAAAAGGTTGTTCCTCTAACTGAGACAACAAATCAAAAGACTGAATTACATGCAATCCATCTAGCTTTGCAGGATTCAGGATCAGAAGTAAATATAGTAACAGACTCACAATATGCATTAGGAATTATTCAGGCACAACCAGACAGGAGTGAATCAGAGATAGTCAATAAAATAATAGAGAAACTAATAGAAAAAGAAAGAGTCTACCTGTCATGGGTACCAGCGCACAAGGGGATTGGAGGAAATGAACAAGTAGATAAATTAGTCAGTTATGGAATCAGGAGGGTGTTATTTTTAGAAGGGATAGATAAGGCTCAAGAAGAACATGAAAAATATCACAGCAATTGGAAAGCAATGGCTAGTGATTTTAATCTGCCACCTATAGTAGCAAAGGAAATAGTAGCCAGCTGTGATAAATGTCAACTAAAAGGGGAAGCTATGCATGGACAGGTAGACTGTAGCCCAGGGATATGGCAATTAGATTGCACACATCTAGAAGGAAAAGTAATCATAGTAGCAGTCCATGTAGCCAGTGGCTATATAGAAGCAGAAGTTATCCCAGCAGAAACAGGACAGGAGACAGCATACTTTCTGCTAAAATTAGCAGGAAGATGGCCAGTAAAAGTAGTACACACAGATAATGGCCCCAATTTCACCAGCAGTGCAGTTAAGGCTGCCTGTTGGTGGGCAAATATCCAACAGGAATTTGGGATTCCCTACAATCCCCAAAGTCAAGGAGTAGTGGAGTCTATGAATAAGGAATTAAAGAAAATCATAGGGCAGGTAAGAGAGCAAGCTGAACACCTTAAGACAGCAGTACAAATGGCAGTATTCATTCACAATTTTAAAAGAAAAGGGGGGATTGGGGGGTACAGTGCAGGGGAAAGAATAATAGACATAATAGCAACAGACATACAAACTAAAGAATTACAAAAACAAATTATAAAAATTCAAAATTTTCGGGTTTATTACAGAGACAGCAGAGATCCAATTTGGAAAGGACCAGCAAAACTACTCGGAAAGGTGAAGGGGCAGTGGTAATACAGGACAATAACGATATAAAAGTAGTACCAAGAAGAAAAGCAAAGATCATTAGGGATTATGGAAAACAGATGGCAGGTGATGATTGTGTGGCAAGTAGACAGGATGAGGATTAGAACATGGAACAGTTTAGTAAAACATCATATGTATGTCTCAAAGAAAGCTAGAGAGTGGGTTTATAGACATCACTATGAAAGCAGGCATCCAAGAGTAAGTTCAGAAGTACACATCCCACTAGGGGATGCTAGGCTAGTAGTAAAAACATACTGGGGTCTGCATTTAGGAGAAAAAGACTGGCACTTGGGTCATGGGGTCTCCATAGAATGGAGACAGGAAAGGTATAGCACACAAATAGACCCTGACCTGGCGGACCAACTAATTCATCTGTATTATTTTGACTGTTTTTCAGAATCTGCCATAAGGAAAGCCATAGTAGGAAACATAGTTAGCCCTAGGTGTAACTATCCAGCAGGACACAACAAGGTAGGATCTCTACAATACTTGGCACTGAAAGCATTAGTAACACCAACAAAGGAAAGGCCACCTTTGCCTAGTATTAGGAAACTAACAGAGGATAGATGGAACAAGCCCCAGAAGACCAGGGGCCGCAGAGGGAACCACACAATGAATGGATGTTAGAACTGTTAGAAGATATTAAGCATGAAGCTGTCAGACATTTTCCAAGGCCGTGGCTCCATGGAATAGGACAATATATCTATAACACCTATGGGGACACTTGGGAAGGGGTTGAAGCTATAATAAAAACTTTGCAACAACTACTGTTTGTTCATTTCAGAATTGGGTGCCAACATAGCAGAATAGGCATTACACAAAGGAGAAGAGTCAGGAATGGATCCAGTAGATCCTAACCTAGAGCCCTGGAATCATCCGGGAAGTCAGCCTAAAACTGCTTGTAACAATTGTTACTGTAAAAAGTGTTGCTGGCATTGCCAAATTTGCTTTCTGAAAAAAGGCTTAGGCATCTCCTATGGCAGGAAGAAGCGGAGACCCAGACGCGGAACTCCTCACAGCAGTAAGGATCATCAAAATCTTATATCAAAGCAGTAAGTACTAAATAAATGTAATGATACCTTTAGAAATCTATGCAATAGTAGCATTAGTAGTAGTGTTTGTCATAGCAATAGTTGTGTGGACTATAGTAGGTATAGAATATAGGAAATTGCTAAAACAAAGAAAAATAGACAGGTTAATTGAGAGAATAAGAGAAAGAGCAGAAGACAGTGGCAATGAAAGCGAGGGGGATGCAGAGGAATTATCAACACTTATGGAGGTGGGGAACTATGCTCTTTTGGATGATAATAATGTGTAAGGCTACAGATAACTTGTGGGTCACAATATACTATGGGGTACCTGTATGGAGAGATGCAGATACCACCCTATTTTGTGCATCAGATGCCAAAGCATATGATAAAGAAGTACATAATGTCTGGGCTACACATGCCTGTGTACCCACAGACCCTCACCCACAAGAAATAATTTTGGAAAATGTGACAGAAAATTTTAACATGTGGAAAAATAACATGGTAGAACAAATGCAAACAGATATAATCAGTCTCTGGGACCAAAGCCTAAAGCCATGTGTAAAGTTAACCCCTCTCTGCGTTACTTTAGATTGTACTGAACCCAACAGCACTAGCTCTAACAACAGTAGCTTTACAAGCAACAGCAGCGATAACTTGTTTAAAGAAATGAAAAACTGCTCTTTCAACGTGACCACAGAACTAAGAGATAAAAGCAAAAAAGCACATTCACTTTTTTATAAACTTGATATAGTATCAACTGGTAGTAATGATAGTGAGCAATATAGACTAATAAATTGTAATACATCAGCCATGACACAGGCCTGTCCTAAGGTATCCTTTGAGCCAATTCCTATATATTATTGTGCCCCAGCTGGTTTTGCGATTCTAAAGTGCAAGGATTCAAATTTTACTGGAAAAGGGCCATGCAAGAATGTCAGCACAGTACAATGCACACATGGAATCAAGCCAGTAGTATCAACTCAACTGCTGTTAAATGGCAGTCTAGCAGAGAAAGAGGTAATGATTAGATCTGAAAATATCACAGACAATGGCAAAGTCATAATAGTACAGCTTACTGAGCCTGTAAACATCACTTGTATCAGACCTGGCAACAATACAAGAACAAGTATACGTATAGGACCAGGACAAACCTTCTATGCAACAGGTGCTGTAACAGGGGACATAAGAAAAGCATATTGTAATGTCAGCAGAGCAGCATGGAATAGCACTTTACAAAAGATAAGTACACAATTAAGAAAATACTTTAATAACAAAACAATAATCTTTAAGAACTCCACAGGAGGGGATTTAGAAGTTACAACACATAGTTTCAATTGTGGAGGAGAATTTTTCTATTGCAATACAACAGACCTGTTTAATAGCACTTGGGACGAAAATGGCACTGTCACAAATGGCACAACGGCCAATGGAACTATAACTCTACCATGCAGAATAAAGCAAATTATAAATATGTGGCAGAGAGTAGGACAAGCAATGTATGCCCCTCCTATCAAAGGAAGTATAAGGTGTGAATCAAACATTACAGGACTACTACTAACAAGAGATGGTGGTAAAACTAATAGCAGCAATGAGACCTTCAGACCTATAGGAGGAAATATGAGGGACAATTGGAGAAGTGAACTATATAAGTATAAAGTAGTAAAAATTGAACCAATAGGAGTAGCACCTACCAGGGCAAAGAGAAGAGTGGTGGAGAGAGAAAAAAGAGCAATTGGACTGGGAGCTGCCTTCCTTGGGTTCTTAGGAGCAGCAGGAAGTACTATGGGCGCGGCGTCAATGACGCTGACGGTACAGGCCAGACAATTATTGTCTGGCATAGTGCAACAGCAAAGCAATTTGCTGAGGGCTATAGAGGCTCAGCAGCATCTGCTGAAACTCACGGTCTGGGGCATTAAACAGCTCCAGGCAAGAGTCCTGGCTGTGGAAAGATACCTAAAGGATCAGCAGCTCCTAGGAATTTGGGGTTGCTCTGGAAAACTCATCTGCACCACTAATGTGCCCTGGAACTCTAGTTGGAGTAATAAATCTCAGAGTGAGATATGGGATAACATGACCTGGATGCAATGGGACAAGGAAGTTATCAATTACACAGACATAATATATGCTCTACTTGAAAAATCGCAAAACCAGCAGGAAAAGAATGAACAAGATTTATTGGCATTGGATAAGTGGGCAAGTCTGTGGAGTTGGTTTGACATATCAAATTGGTTGTGGTATATAAGAACATTCATAATAATAGTAGGAGGCTTAATAGGATTAAGAATAGTTTTTGCTGTGCTTTCTATAATAAATAGAGCCAGGCAGGGATACTCACCCTTGTCATTGCAGACCCTTACCCCCCACCCAGAGGGACCAGACAGGCCCGAAAGAATCAAAGAAGAAGGTGGAGAGCAAGGCAGAGACAGCTCGATTCGATTAGTGAGCGGATTCTTAACACTTGCCTGGGACGATCTGCGGAGCCTGTGTCTCTTCAGCTACCACCGATTGAGAGACTTCATCTCGATTGCAGCGAGGACTGTGGAACTTCTGGGACGCAGCAGTCTCAAGGGACTGAGACTGGGGTGGGAGGGCCTCAAATATCTGGGGAATCTTCTGGGATATTGGGGTCAGGAACTAAAGAGTAGTGCTATTAATCTGGTAGATACCATAGCAATAGCAGTAGCTGGGGGGACAGATAGGGTTATAGAAATAGGACAAACAATTTGTAGAGCTATTCGTAACATACCTAGGAGAATCAGACAGGGAGCAGAAAAGGCTTTGCAATAACATGGGGGGCAAATGGTCAAAAGGTAGCATAGTGGGATGGCCTCAGGTTAGGGAAAGAATAAGACGAGCTCCTGCTCCAGCAGCAATAGGAGTAGGACCAGTATCTCAAGATTTGGATAAGCATGGAGCAATCACAAGCAGTAATACAGCAGCTAATAATGCCGAGTGCGCCTGGCTGGAGGCGCAAGAGGAAGAGGAGGTAGGCTTTCCAGTCAGGCCGCAGGTACCTTTGAGACCGATGACATATAAGGGAGCTGTAGATCTGAGCCACTTTTTAAAAGAAAAGGGGGGACTGGAAGGGTTAATTTGGTCCAGGAAAAGACAAGAGATTCTTGATCTTTGGGTCTACAACACACAAGGCTACTTCCCTGATTGGCAAAACTACACACCAGGGCCAGGGATTAGATATCCACTGACCTTTGGATGGTGCTGGGAGCTAGTACCAGTAGATCCAAAGGAGGTGGAAGAGGACACTGAAGGAGAGAACAACTGCTTGTTACACCCTATAAACCAGCATGGAATGGAGGACTCGGAGAGAGAAGTGTTAAAGTGGAGATTTAACAGTAGACTGGCATTTGAACACATGGCCCGAAAGCTGCATCCGGAGTTCTACAAAGACTGCTGACACCGAGACGAAGACTGCTGACACTGAGTTTTCTACAAGGGACTTTCCGCTGGGGACTTTCCAGGAAGGCGTAACCGGGGCGGGACTGGGAGTGGCTAACCCTCAGATGCTGCATATAAGCAGCTGCTTTTCGCCTGTACTGGGTCTCTCTTGTTAGACCAGATTTGAGCCTGA
>A1.SE.95.SE8891.AF069673_F1.ES.x.X1093_2.DQ979025
GCGAGAGCGTCAAAATTAAGTGGGGAAAAAAAAGATGCTTGGGAGAAAATGCGGTTAAGGCCAGGGGGAAAGAAAAAATATAAACTGAAACATATGGTATGGGCAAGAAGGGAGCTGGAAAAATCCGCACTTAACCCTAGCCTTTTAGAAACAACAGAAGGATGTCAACAAATAATGGATAAATTACAACCAGCTCTCAGGACAGGAACAGAAGAACTTAGATCACTATATAATACAGTAGCAACCCTCTATTGCGTACATCAAAAGATAGCTGTAAAAGACACCAAGGAAGCTTTAGACAAAATAGAGGAAATACAAAATAAGAACAAGCAAAAGACACAACAAGCAGCAGCTGACACAGGGAACAGCAGCAATGTCAGCCGAAATTACCCTATAGTGCAAAATGCGCAAGGGCAAATGGTACACCAATCCTTATCACCTAGGACTTTGAATGCATGGGTGAAAGTAATAGAAGAAAAGGGTTTCAGCCCAGAAGTAATACCCATGTTCTCAGCATTATCAGAAGGAGCCACCCCGGGTGACTTAAATATGATGCTGAACATAGTGGGGGGACACCAGGCAGCTATGCAAATGTTAAAAGATACCATCAATGAGGAAGCTGCAGAATGGGACAGGTTACATCCAGTACATGCAGGGCCTATTCCACCAGGCCAGATGAGAGAACCCAGGGGAAGTGACATAGCAGGAACTACTAGTACCCCTCAAGAACAAATAGGATGGATGACAAGCAATCCACCTATCCCAGTGGGAGACATCTATAAAAGATGGATAATCCTAGGATTAAATAAAATAGTAAGAATGTATAGCCCTGTTAGTATTTTGGACATAAAACAAGGGCCAAAAGAACCCTTCAGAGACTATGTAGATAGGTTCTTTAAAACTCTCAGAGCCGAACAAGCTACACAGGAGGTAAAAGGTTGGATGACAGAAACCTTGCTGGTCCAAAATGCAAATCCAGATTGTAAGTCCATTTTAAGAGCATTAGGATCAGGGGCTACATTAGAAGAAATGATGACAGCATGCCAGGGAGTGGGAGGACCTGGCCATAAAGCAAGGGTTTTAGCTGAGGCAATGAGTCAAGTACAACAGGCAAACGTAATGATGCAGAGAGGCAATTTTAAGGGCCAGAAAAGAATTAAGTGTTTCAACTGTGGCAAAGAAGGACACCTAGCCAGAAATTGCAGGGCCCCTAGGAAAAAAGGCTGTTGGAAATGTGGGAAGGAAGGACATCAAATGAAAGACTGCACTGAAAGACAGGCTAATTTTTTAGGGAAAATTTGGCCTTCCAACAGGGGGAGGCCAGGAAATTTTCCTCAGAGCAGACCGGAGCCAACAGCCCCACCAGCAGAGATCTTTGGGATGGGGGAAGAGATAACCTCCCCTCCGAAGCAGGAGAAGAAAGACAGGGAGTCGGAGGCACCACCCTTAATTTCCCTCAAATCACTTTTTGGCAACGACCCCTTGTCACAGTAAGAATAGGGGGAATGCAAAAAGAAGCTCTATTAGATACAGGAGCAGATGATACAGTATTAGAAGATATAAATTTGCCAGGAAAATGGAAACCAAAAATGATAGGGGGAATTGGAGGTTTTATCAAAGTAAAGCAGTATGATCAGATACTTATAGAAATTTGTGGGAAAAAGGCTATAGGTACAGTATTAGTAGGACCTACACCTGTCAACATAATTGGAAGAAATATGTTGACTCAGATTGGTTGTACTTTAAATTTTCCAATTAGTCCTATTGAGACTGTACCAGTAACATTAAAACCAGGAATGGATGGCCCAAGAATTAAACAATGGCCATTGACAGAAGAAAAAATAAAAGCATTAACAGAAATTTGTAGAGAGATGGAAAAGGAAGGAAAAATCTCAAAAATTGGGCCTGAAAATCCATACAATACTCCAGTATTTGCTATAAAGAAAAAAGATAGCACTAAGTGGAGAAAATTAGTAGATTTTAGAGAGCTCAATAAAAGAACTCAAGACTTCTGGGAATACCACATCCTGCAGGTTGAAAAAAGAAAAAATCAGTAACAGTACTAGATGTAGGGGACGCATATTTTTCAGTTCCTTTGGATAAAAACTTTAGAAAGTATACTGCGTTCACCATACCTAGTATAAACAATGAGACACCAGGAATCAGATATCAGTACAATGTGCTTCCACAGGGATGGAAAGGATCACCGGCAATATTCCAGAGTAGCATGATAAAAATCTTAGAGCCCTTTAGAGTACAAAATCCAGAAATAATTATCTATCAATACATGGATGACTTGTATGTAGGATCTGATCTAGAAATAGGGCAGCATAGAGCAAAAGTAGAGGAGTTGAGAGCTCATCTATTGAGTTGGGGGTTTACTACACCAGACAAAAAGCATCAGAAAGAACCTCCATTTCTTTGGATGGGATATGAACTCCATCCTGACAAATGGACAGTACAGCCTATACAGCTGCCAAACAAAGAAAACTGGACTGTCAATGATATACAGAAATTAGTGGGAAAACTAAATTGGGCAAGTCAAATTTATGTAGGAATTAAAGTAAAGCAACTGTGTAAACTCCTCAGAGGAGCCAAAGCACTAACAGATATAGTAACACTGACTGAGGAAGCAGAATTAGAATTGGCAGAAAACAGGGAGATTCTAAAAGACCCTGTGCATGGAGTATATTATGACCCATCAAAAGACTTAATAGCAGAAATACAGAAACAAGGGCAAGACCAATGGACATATCAAATTTATCAAGAGCCATTTAAGAATCTAAAAACAGGAAAATATGCAAGAAAAAGGTCTGCTCACACTAATGATGTAAGACAATTAGTAGAAGTGGTGCAAAAGGTAGTCATGGAAAGCATAGTAATTTGGGGAAAGACTCCTAAATTTAAATTACCCATACAAAAAGAAACATGGGAGACATGGTGGATGGACTATTGGCAAGCTACCTGGATTCCTGAATGGGAATTTGTCAATACCCCTCCTCTAGTAAAATTATGGTACCAGTTAGAGAAAGACCCCATAGTAGGAGCAGAAACTTTCTATGTAGATGGGGCAGCTAATAGGGAAACTAAGCTAGGAAAAGCAGGATATGTCACTGACAGAGGAAGACAAAAGGTTGTTACCCTAGCTGAGACAACAAATCAAAAGACTGAACTGCATGCAATCTATCTAGCCTTGCAGGATTCAGGATCAGAAGTAAATATAGTAACAGACTCACAGTATGCATTGGGAATTATTCAGGCACAACCAGACAGAAGTGAATCAGAGTTAGTTAATCAAATAATAGAGAAGCTAATAGGAAAGGACAAAGTCTACCTGTCATGGGTACCAGCACACAAGGGGATTGGAGGAAATGAACAAGTAGATAAATTAGTCAGTGCTGGAGTCAGGAGGATACTATTTTTAGATGGGATAGATAAGGCTCAAGAAGAACATGAAAGATATCACAGTAATTGGAGAACAATGGCTAGTGATTTTAATCTGCCCCCTATAGTAGCAAAGGAAATAGTAGCCAGCTGTGATAAATGTCAACTAAAAGGGGAAGCCATGCATGGACAAGTAGACTGTAGTCCAGGGATGTGGCAATTAGATTGCACACATCTAGAAGGAAAAGTAATTCTGGTAGCAGTCCATGTAGCCAGTGGCTATATAGAAGCAGAAGTGATCCCAGCAGAAACAGGACAGGAAACAGCATACTTTCTGCTAAAATTAGCAGGAAGATGGCCAGTAAAAGTAGTACACACAGACAATGGCAGCAATTTCACCAGCGCTGCATTTAAAGCAGCCTGTTGGTGGGCAAATGTCCAACAGGAATTTGGGATCCCCTACAATCCCCAAAGTCAAGGAGTAGTGGAATCTATGAATAAGGAATTAAAGAAAATCATAGGGCAGGTAAGAGAACAAGCTGAACACCTTAAGACAGCAGTACAAATGGCAGTATTCATTCACAATTTTAAAAGAAAAGGGGGGATTGGGGGGTACAGTGCAGGGGAAAGAATAATAGACATAATAGCAACAGACATACAAACTAAAGAACTACAAAAACAAATTACAAAAATTCAAAATTTCCGGGTTTATTACAGAGACAGCAGAGACCCAGTTTGGAAAGGACCAGCCAAGCTCCTGTGGAAAGGTGAAGGGGCAGTAGTCATACAAGACAATAGTGAAATAAAAGTAGTACCAAGAAGAAAAGTAAAGATCATTAGGGATTATGGAAAACAGATGGCAGGTAATGATTGTGTGGCAGGTAGACAGAATGAGGATTAACACATGGAAAAGTTTAGTAAAATACCATATGCATGTTTCAAAGAAAGCCAAAAAATGGTTTTATAGACATCATTATGAAAGCAGGCATCCAAGAATAAGTTCAGAAGTACACATCCCACTAGAAGAAGATAAATTAGTAATAACAACATATTGGGGTCTGCATACAGGAGAAAGAGAGTGGCATCTGGGTCAGGGAGTCTCCATAGAATGGAGGCAGGGGAAGTATAGGACACAAATAGACCCTGGCACGGCAGACCAACTGATCCATATATATTATTTTGATTGTTTTTCAGAATCTGCCATAAGAAAAGCCATATTAGGAGAGAGAGTTAGCCCTAGGTGTAACTATCAAGCAGGACATAACAAGGTAGGATCCCTACAATATTTGGCACTAACAGCATTAATAGCTCCAAAGAAGGCAAAACCGCCTTTGCCTAGTGTCAGGAAACTAGTAGAAGATAGATGGAACAAGCCCCAGGAGACCAAGGGCCACAGAGGGAACCATACAATGAATGGGCACTAGAGCTTTTAGAGGAGCTTAAGAATGAAGCTGTTAGACATTTTCCTAGGCCATGGCTCCATGGCTTAGGACAACATATCTACAATACTTATGGGGATACTTGGGTGGGAGTTGAAGCTCTCATAAGGATACTGCAACAACTACTGTTTGTCCATTTCAGAGTGGGGTGCCAACATAGCAGAATAGGCATTATGCCACAGAGAAGAGTAAGAAATGGAACCCGTAGACCCTAACTTAGATCCCTGGAACCATCCAGGAAGCCAGCCTACAACTCCTTGTACCAATTGTTATTGTAAAAAGTGTTGCTTTCATTGCTACTACTGCTTTGCAACGAAGGGCTTAGGCATCTCCTATGGCAGGAAGAAGCGGAGACAGCGACGCAGAACTTCTCACAGCAGTAAGGTGCATCAAAATCCTGTACCAGAGCAGTAAGTATTGATTAAGTAGTGTATGTAATGTTTGATTTATTAGCAATAGCAATAGTAGCATTAGTGATAGCAGGAATACTAGCAATAGTTGTGTGGATTATAGCATTGATAGAATATAGGAAAGTAGTAAGGCAAAGAAGAATAAATAGATTATATGAAAGAATAATAGAGAGAGCAGAGGACAGTGGCAATGAGAGTGAGGGGGATGCAGAGGAATTGGCAGCACTTGGGGAAGTGGGGCCTTTTATTCCTGGGGATATTAATAATCTGTAATGCTGCAGACAACTTGTGGGTCACAGTCTATTATGGGGTACCTGTGTGGAAAGAAGCAACCACTACTTTATTTTGTGCATCAGATGCTAAAGGATATGAAAGAGAGGTACATAATGTCTGGGCTACACATGCCTGTGTACCCACAGACCCCGACCCACAGGAAATATGGCTAGAAAATGTAACAGAAACTTTTGATATGTGGAAAAATAACATGGTAGAACAAATGCATAAAGATATAATCAGTTTATGGGATCAAAGCCTAAAGCCATGTGTGAAATTGACCCCACTCTGTGTTTCTTTAAACTGTACAAATGCCAATTCCAATAGCTCCACTAACAGCACCCTGAGGGAAGAGCCAGGAGCAATAAAAAACTGTTCTTTCAATATGACCACAGAAGTAAGAGACAAGCAGCGGAAAGTAAATGCACTATTTTATAGAGTTGATATAGTACCAATCAATAGTAATGGTACTGAGGATAGTGGTGAATATAGGCTAATAAATTGTAATACCTCAACCATTAAACAGGCTTGTCCAAAGGTATCTTGGGATCCAATCCCCATCCATTATTGTGCTCCAGCTGGTTTTGCGATTCTAAAATGTAATAACAAAACGTTCAATGGGACAGGGCCATGCAATAATGTTAGTACAGTACAATGCACACATGGAATTAAGCCAGTGGTATCAACTCAAATGCTGTTAAATGGCAGCTTAGCAGAAGGAGATATAATAATCAGAACTCAGAATATCTCAGATAATACAAAAACCATAATAGTACACCTTAATGCATCTGTACAGATTAATTGTACAAGACCCAACAACAATACAAGAAAAAGTATACATTTAGGACCAGGACAAGCATTCTATGCAACAGGTGACATAATAGGAGATATAAGAAAGGCACATTGTAACATTAGTAGAATACAATGGAATACCACTCTAGAACAGGTAAAGAAAAAGTTAGGGTCCTATTTCCCTAATAAAACAATAGCATTTAACCAATCCTCAGGAGGGGACCTAGAAATTACAATGCATAGTTTTAATTGTAGAGGAGAATTTTTCTACTGCAATACATCAGAACTGTTTAATGACACAGGATCCAATGGCACTATCACTAATGACACTATTACTCTCCCATGTAAAATAAAACAAATTGTAAGAATGTGGCAGGGAGTAGGACAAGCAATGTATGCTGCTCCTATTGCAGGAAACATTACCTGTAACTCAAATATTACAGGCCTAATGTTGACAAGAGATGGTGGTAAAGATAATAGTTCGACCGAGATCTTCAGACCTGGGGGAGGAAATATGAAAGACAACTGGAGAAGTGAACTATATAAATATAAAGTAGTAGAAATTGAACCACTAGGAATAGCACCCACCAAGGCAAGAAGACGAGTGGTGGGGAGAGAGAGAGAAAAGAGAGCAGTGGGAATAGGAGCTTTGTTCCTTGGGTTCTTGGGAGCAGCAGGAAGCACTATGGGCGCAGCGTCACTAACGCTGACGGTACAGGCCAGACAATTATTGTCTGGAATAGTGCAACAGCAGAACAATCTGCTGAAGGCTATTGAAGCGCAACAGCATCTGTTGCAGCTCACAGTCTGGGGCATTAAACAGCTCCAGGCAAGAGTCCTGGCTGTGGAAAGGTACCTAAAGGATCAACAGCTCCTAGGGATTTGGGGCTGCTCTGGAAAACTCATCTGCACCACTAATGTGCCTTGGAACTCTAGTTGGAGTAATAGATCTCAGGAGGAGATTTGGGGAAACATGACCTGGATGGAGTGGGAAAAAGAGATTAGTAATTACTCAGACACAATATACAAGTTAATTGAACAATCACAGAACCAGCAGGAAATAAATGAAAAAGACTTATTGGCATTGGACAAATGGGCAAGTCTGTGGAATTGGTTTGACATATCACACTGGCTGTGGTATATAAGAATATTCATAATGATAGTAGGAGGCTTGATAGGCTTAAGAATAGTTTTTGCTGTGCTTTCTATAATAAATAGAGTTAGGAAGGGATACTCACCTTTGTCATTGCAGACCCTTACCCCAAGCCCGAGGGAACCCGACAGGCCCGAAGGAATCGAAGAAGGAGGTGGAGAGCAAGACAGAGACAGATCCGTGCGATTAGTGAACGGATTCTTAGCTCTTGTCTGGGACGATCTGCGGAACCTGTGCCTCTTCAGCTACCGCCACTTGAGAGACTTCATATTAATTGCAGCGAGGACTGTGAACAGGGGGCTGAGGATAGGGTGGGAGACCCTCAAATATCTGTGGAATCTCGCTCAGTATTGGAGTCGGGAACTAAAGAATAGTGCTGTTAGCTTATTTGACACCATAGCAATAGTAGTAGCTGAAGGGACAGATAGAATTATAGAAGCTTTGCAAAGAGCTGGTAGAGCTGTTCTCCACGTACCTAGAAGAATCAGACAGGGCTTCGAAAGGGCTTTGCTATAAAATGGGTGGCAAGTGGTCAAAAAGTAGTATAGTTGGGTGGCCTGCTGTAAGGGAAAGAATGAGACGGACCCCTTCAGCGGCAGCAGGGGTGGGAGCAGCGTCTCAAGACTTAGATAAACGGGGGGCAATTACAACCAGCAATACTAAAGATACTAATGCTGATGTAGCCTGGCTGGAAGCACAAGAGGATGAAGAAGTAGGCTTTCCAGTCAAACCTCAGGTACCTTTAAGACCAATGACTTATAAGGGGGCTGTAGATCTCAGCCACTTTTTAAAAGAAAAGGGGGGACTGGAAGGGCTAATTTATTCCAGGAGAAGACAAGAGATCCTTGATCTGTGGGTTTACCACACACAAGGCTACTTCCCTGATTGGCAAAACTACACACCAGGGCCAGGGATCAGATACCCCCTGACCTTTGGTTGGTGCTTCAAGCTAGTACCAGTCCCTCCAGAGGAGGTAGAAAGGGCCAATGAAGGAGAGAATAACTGCTTGCTACACCCCATGAGCCAACATGGAATGGAGGATGAAGACGGAGAAGTACTGATGTGGAAGTTTGACAGCCACCTAGCACTGAGACACCTAGCCAGAGAGAGACATCCGGAGTTCTACAAAGACTGAGAACTGCTGACCAGAGAATGCTGACASGAAGATTYTAAAGGGACTTTCCACCAGGGACTTTCCAGAGGGCGGTACAGGGGCGGGAGCATGGGAGTGGTAACCCTCAGATGCTG
>A1.KE.00.KNH1207.AF457068_F1.FR.96.MP411.AJ249238
GCGAGAGCGTCAGTATTAAGTGGGGGAAAATTAGATGCATGGGAGAAAATTAATTTAAGGCCAGGGGGAAAGAAAAAATATAAAATGAAGCATTTAGTATGGGCAAGCAGGGAGCTGGAAAGATTCGCACTTAACCCTAGTCTTTTAGAAACAGCAGAAGGATGTCAACAAATAATAGAACAATTACAACCAGCTCTCAGGACAGGAACAGAAGAATTTAGATCATTATTTAATACAGTAGCAACCCTCTATTGCGTGCATCAAAAGATTGATGTAAAAGACACCAAGGAAGCTTTAGATAAAATAGAAGAAATACAAAATAAGAACAAGCAAAAGACACAGCAGGCAGCGGCTGATACAGGAAACAGCAGCAAGGTCAGTCAAAATTACCCTATAGTACAAAATCTTCAGGGACAGATGGTACATCAGCCTATATCACCTAGAACTTTAAATGCATGGGTAAAAGTGATAGAAGAGAAGGCTTTTAGCCCAGAAGTAATACCCATGTTCTCAGCATTATCAGAAGGGGCCACCCCACAAGATTTAAACACCATGCTAAATACAGTGGGTGGACATCAAGCAGCCATGCAAATGTTAAAAGACACCATCAATGAGGAAGCTGCAGAATGGGACAGATTACATCCAGCGCATGCAGGGCCTATCCTACCAGGCCAGATGAGAGAACCTAGGGGTAGTGACATAGCTGGAACTACTAGTACCCTTCAGGAACAAATACAATGGATGACAAGCAACCCACCTGTCCCAGTGGGAGACATCTATAAAAGATGGATCATCCTAGGATTAAATAAAATAGTAAGAATGTATAGCCCTGTTAGCATTTTGGACATAAGACAAGGGCCAAAGGAACCTTTTAGAGACTATGTGGACAGGTTCTTTAAAACTCTAAGAGCTGAGCAAGCTTCACAGGAAGTAAAGAATTGGATGACAGAAAGCTTGCTGGTGCAAAATTCGAACCCAGACTGTAAGACCATCTTAAAAGCATTAGGACCAGGGGCTACACTAGAAGAAATGATGACAGCATGTCAGGGAGTGGGAGGACCTGGCCATAAGGCAAGGGTTTTGGCTGAGGCCATGAGCCAAGCAACAAATGCAGCTATAATGATGCAGAAAAGTAACTATAAGGGCCCAAGAAGATTTATTAAATGTTTTAATTGTGGCAAAGAAGGACACATAGCCAAAAATTGCAGGGCCCCTAGAAAAAAGGGCTGTTGGAAATGTGGAAAAGAAGGACATCAAATGAAAGACTGCACTGAAAGACAGGCTAATTTTTTAGGGAAAATTTGGCCTTCCAACAAGGGGAGGCCCGGAAATTTTCTTCAGAACAGGCCAGAGCCAACAGCCCCGCCAGCGGAGAGCTTCGGGTTCAAAGAGGAAATAACCCCCTCTCCGAAGCAGGAGCAGAAGGACGAGGGACAGGGACTGTATCCTCCCTTAGCCTCCCTCAAATCACTTTTTGGCAGCGACCCTTAGTCACCATAAGAGTGGGGGGACAGCTAAGGGAAGCTCTATTAGATACAGGAGCAGATGATACAGTATTAGAAGACATAGATTTGCCAGGAAAATGGAAACCAAAAATAATAGGGGGAATTGGAGGTTTTATCAAAGTAAAACAGTATGATCAAATAACCATAGATATTTGTGGACACAAGGCTATAGGTACAGTGTTAGTAGGACCTACACCTGTCAACATAATTGGAAGGAATATGTTGACTCAGATTGGTTGCACTTTAAATTTTCCAATTAGTCCTATTGAAACTGTACCAGTAAAATTGAAGCCAGGAATGGATGGCCCAAAGGTTAAACAATGGCCATTGACAGAGGAAAAAATAAAAGCACTAACAGAAATATGTACAGATATGGAAAAAGAAGGAAAGATTTCAAAAATTGGGCCTGAAAATCCATACAATACTCCAATATTTGCCATAAAGAAAAAAGACAGTACTAAATGGAGAAAATTAGTAGATTTTAGAGAACTTAATAAAAGAACTCAAGATTTTTGGGAAGTTCAATTAGGAATACCACATCCTGCAGGGTTAAAAAAGAAAAAGTCAGTAACAGTACTAGATGTGGGGGATGCATATTTTTCAGTTCCCTTAGATAAGGAGTTCAGGAAGTACACTGCATTCACCATACCTAGTCTCAACAATGAGACACCAGGAATCAGATACCAGTACAATGTGCTTCCACAAGGGTGGAAAGGATCACCAGCAATATTCCAAAGTAGTATGACAAAAATTTTAGAGCCCTTTAGAGCAAAAAATCCAGACATAGTTATCTACCAATACATGGATGATTTGTATGTAGGGTCTGACTTAGAACTAGGGCAGCATAGGATGAAAATAGAGGAGTTAAGGGAACATCTACTGAAATGGGGCTTTACTACACCAGACAAGAAACATCAGAAAGAACCCCCATTCCTTTGGATGGGGTATGAACTCCATCCTGATAAATGGACAGTACAGCCTATACAACTGCCAGAAAAGGACAGCTGGACTGTCAATGATATACAGAAGTTAGTAGGAAAATTAAATTGGGCAAGTCAGATTTATCCAGGGATTAAAATAAAGCAATTATGTAAACTCCTTAGGGGAGCCAAGGCACTAACAGACATAGTGCCACTGACTGAAGAAGCAGAGTTAGAATTGGCAGAGAACAGGGAGATTCTAAAAGAACCGGTACATGGGGTATATTATGACCCATCAAAAGACTTAATAGCAGAACTGCAGAAACAAGGGCAAGGCCAATGGACATATCAAATTTATCAAGAGCCATTTAAAAACCTAAAAACAGGAAAGTATGCAAAAACAAGGTCTGCCCACACTAATGATATAAAAGAATTAACAGATGCAGTGCAAAAGGTAGCTAGGGAATGCATAGTAATATGGGGAAAGAGTCCTAAGTTTAGGCTACCCATACAAAAGGAAACATGGGAGGCATGGTGGACAGATTATTGGCAAGCCACCTGGATTCCTGAATGGGAGTTTGTCAATACCCCCCCTCTAGTAAAACTATGGTATCAGTTAGAAACAGAGCCCATCATAGGAGCAGAAACCTTCTATGTAGATGGGGCATCTAATAGAGAGACCAAAAAAGGAAAAGCAGGATATGTTACTGACAGAGGAAGACAAAAGGCTGTCATCCTAACTGAAACCACAAATCAGAAGGCTGAGTTACAAGCAATTCATTTAGCTTTACAGGATTCAGGATCAGAAGTGAATATAGTAACAGACTCACAGTATGTATTAGGAATTATTCAAGCACAACCAGATAAGAGTGAATCAGAGATAGTCAATAAAATAATAGAGAAATTAATACAAAAGGAAAGGGTCTACCTGTCATGGGTACCAGCACACAAAGGGATTGGAGGAAATGAACAAGTAGATAGATTAGTCAGTGCTGGAATCAGGAAAATACTGTTTTTAGATGGGATAGATAAGGCACAAGAAGAACATGAAAAATATCACAACAACTGGAGAGCAATGGCTAGTGATTTTAATCTGCCACCAGTAGTAGCAAAAGAAATAGTAGCTAGCTGTGATAAATGTCAGCTAAAAGGAGAGGCCATGCATGGACAAGTAGACTGTAGTCCAGGAATATGGCAATTAGATTGTACACATTTAGAAGGAAAAATTATCCTAGTAGCAGTCCATGTAGCTAGTGGATATATAGAAGCAGAAGTCATTCCAGCAGAAACAGGACAGGAAACAGCCTACTTCATACTAAAGTTAGCAGGAAGATGGCCAGTAAAAATAATACATACAGACAATGGTAGCAATTTCACCAGTAGTGCAGTTAAGGCAGCCTGTTGGTGGGCAGGTATACAGCAGGAATTTGGAATTCCCTACAATCCCCAAAGTCAAGGAGTAGTAGAATCCATGAATAAAGAATTAAAGAAAATCATAGGACAAGTAAGAGATCAAGCTGAACATCTTAAGACAGCAGTACAAATGGCGGTATTCATTCACAATTTTAAAAGAAAAGGGGGGATTGGGGGGTACAGTGCAGGGGAAAGAATAATAGACATAATATCAACAGACATACAAACTAGAGAATTACAAAAACAAATTATAAAAATTCAAAATTTCCGGGTTTATTACAGGGACAGCAGAGACCCAGTTTGGAAAGGACCAGCAAAGCTACTCTGGAAAGGTGAAGGGGCAGTAGTCATACAAGACAATAGTGAAATAAAAGTAGTACCAAGAAGAAAAGCAAAGATCATTAGAGATTATGGAAAACAGATGGCAGGTGATGATTGTGTGGCAGGTAGACAGGATGAGGATTAGCACATGGAAAAGTTTAGTAAAATACCATATGCATGTTTCAAAGAAAGCCAAAAATTGGTTTTATAGACATCATTTTCAAAGCAGGCATCCAAAAATAAGTTCAGAAGTACACATCCCACTAGAAGAAGCTAAATTAGTAGTAACAACATATTGGGGTCTGCATACAGGAGAAAGAGATTGGCATCTGGGTCAGGGAGTCTCCATAGAATGGAGGCAGGGACGGTATAGGACACAAATAGATCCTGACCTGGCAGACCAACTGATCCATATATATTATTTTGATTGTTTTTCAGCCTCTGCCATAAGGAAAGCCATCTTAGGACATAGAATTAGCCCTAGGTGTAACTATCAAGCAGGACATAACAAGGTAGGATCCCTACAATATTTGGCACTAACAGCATTAATAGCTCCAAAGAAGACAAAGCCGCCTTTGCCTAGTGTCAAGAAACTAGTAGAAGATAGATGGAACAAGCCCCAGGAGACCAGGGGCCACAGAGGGAGCCATACAATGAATGGACACTAGAGCTTTTAGAGGAGCTTAAGAATGAAGCTATTAGACATTTTCCTAGGCCATGGCTTCATGGATTAGGACAATATATCTATAACACCTATGGGGATACTTGGGAAGGAGTTGAAGCTATAATAAGGATACTGCAACAACTACTGTTTATCCATTTCAGAATTGGGTGCCAACATAGCAGAATAGGCATTATTCGACAGAGAAGAGTAAGAAATGGAACTAGTAGATCCTAACTTAGATCCCTGGAATCAACCAGGAAGCCAGCCTACAACTCCTTGTACCAAATGTTATTGTAAAAAGTGTTGCTTTCATTGCTACTGCTGCTTTGCAACGAAGGGCTTAGGCATCTCCTATGGCAGGAAGAAGCGGAGACAACGACGAAGAACTCCTCAGAGCAGTCAGAGCCATAAAAATCCTATACCAGAGCAGTAAGTATTATAGTATATGTAATGTCCAATCTGTATGTATTATCAATAGTAGCATTTATAATAGCATTAATAATAGCAATAGTTGTGTGGACTATAGTATTTATAGAATATAAGAAATTGTTAAGGCAAAGAAAAATAAATAGGTTATATGAAAGAATAAGAGAAAGAGCAGAAGACAGTGGCAATGAGAGTGAGGGTGATGCAGAGGAACTGGCAGCACTTGGGGAAATGGGGTCTTTTATTTCTGGGGATATTAATAATCTGTAGTGCTGCAGACAACTTGTGGGTTACAGTCTATTATGGGGTACCTGTGTGGAAAGAAGCAACTACTACGTTATTTTGTGCATCAGATGCTAAAGGATATGAAAGAGAAGTGCATAATGTCTGGGCCACACATGCCTGCGTACCCACAGACCCCAACCCACAGGAAATATGGCTGAAAAATGTAACAGAAAATTTTGATATGTGGAAAAATAACATGGTAGAACAAATGCATGAAGATATAATCAGTTTATGGGATCAAAGCCTAAAGCCATGTGTAAAGTTAACTCCACTCTGTGTTACTTTACACTGTAGTGATGTCAATATCACTAGTAATGCCACTACCACTAATGACACCAGCACCCCGGAAGAGTCAGGGGCAATACAAAACTGTTCTTTCAATATGACCACAGAAGTAAAAGACAAGAAGCTGAGAGTAAATGCACTCTTTTATAAACTTGATATAATACCAATCAATAACAGCAGTAGTAGTGACTATAGGCTAATAAATTGTAATACCTCAACCATTAAACAGGCTTGTCCAAAGGTATCTTGGGATCCAATTCCCATACATTATTGTGCTCCAGCTGGTTATGCGATTCTAAAGTGTAGGGATCCAAGGTTCAATGGGACAGGGCCATGCAAGAATGTCAGCACAGTACAATGTACACATGGAATTAGGCCAGTGGTATCAACTCAATTGCTGTTAAATGGCAGCCTGGCAGAAGAAGATATAATAATCAGATCTCAAAATATCTCAGATAATGCAAAAACCATAATAGTACACCTTAATGAAAGTGTACAGATTAATTGTACAAGACCCAACAACAATACAAGAAAAAGTATACATTTAGGACCAGGACAAGCATTCTATGCAACAGGTGATATAATAGGAGATATAAAAAAGGCATATTGTGAAATTAATGGAACACAATGGAGTAAAACTAAAACACAGGTACAAGAAAAGTTACGGGCTCTTTTTAATAAAACAATAAAATTTAACCAATCCTCAGGAGGGGACCTAGAAATTACAATGCATAGTTTTAATTGTAGAGGAGAGTTCTTCTACTGCGATACATCAGGATTGTTTAATGAAAGTGAAAAGTACAATGGCACTATCATTCTCCCATGTAAAATAAAACAAATTATAAACATGTGGCAGGGAGTAGGACAAGCAATGTATTCCGCTCCCATTGCAGGACGCATTAACTGTAACTCAACTATTACAGGCCTACTATTAACAAGAGATGGTGGTCAGAGTAATGATACTAATAGGACTGAGACTTTCAGACCTGAGGGAGGAAACATGAAAGACAATTGGAGAAATGAACTATATAAATATAAAGTAGTAGAAATTGAACCACTAGGAGTAGCACCCACCAAGGCAAGAAGACGAGTGGTGCAGAGAGAAAGAAGAGCAGTGGGAATAGGAGCTCTGTTCCTTAGATTCTTGGGAGCAGCAGGAAGCAACATAGGCGCAGCGTCAATAACGCTGACGGTACAGGCCAGACAATTACTGTCTGGAATAGTGCAGCAGCAAAACAATTTGCTGAGGGCTATTGAAGCGCAACAGCATCTGTTGCAGCTCACAGTCTGGGGCATTAAACAGCTCCAGGCAAGAGTCCTTGCTGTAGAAAGATACCTAAAGGATCAACAGCTCCTAGGGATTTGGGGCTGCTCTGGAAAACTCATCTGCACCACTAACGTGCCTTGGAACACTAGTTGGAGTAATAAATCTCATGATGAGATTTGGAACAACATGACCTGGATGCAGTGGGAAAAAGAGATTAACAATTACTCAAACACAATATACAGGTTAATTGAAGAATCGCAGAACCAACAGGAAAAGAATGAACAAGAATTATTGGCATTGGACAAATGGGCAAGTCTGTGGAGTTGGTTTGACATATCAAATTGGCTGTGGTATATAAAAATATTCATAATGATAGTAGGAGGAATGATAGGCTTAAGAATAGTTTTTGCTGTGCTTTCTATAGTAAATAGAGTTAGGAAGGGATACTCACCTTTGTCATTACAGACCCTTATCCCAAGCCCGAGGGGACCCGACAGGCCCGAAGGAATCGAAGAAGGAGGTGGAGAGCAAGACAGAAACAGATCCGTTCGATTAGTGAACGGATTCTTGTCGCTTGTCTGGGACGACCTGAGGAACCTGTGCCTCTTCAGCTACCGCCACTTGAGAGACTTCATATTAATTGCAGCAAGGACTGTGGACAGGGGACTAACGAGGGGGTGGGAAACCCTCAAATATCTATGGAACCTCGCACAGTATTGGAGTCAGGAACTAAAGAATAGTGCTATTAGCTTGCTTAATACCACAGCAATAGTAGTAGCTGAGGGAACAGATAGAGTTATAGAAGTTTTGCAAAGAGCTGGTAGAGCTGTTCTCAACGTACCTAGAAGGATAAGACAGGGCTTAGAAAGGAGTTTGCTATAAAATGGGTGGTAAGTGGTCAAAAAGTAGTATAGTTGGATGGCCTGCTGTAAGGGAAAGAATGAGAAGGACCCCTCCAGCAGCAGAAGGGGTGGGAGCAGTGTCTCAAGACTTAGATAGGCGAGGGGCAGTTACAAGCAGCAATACTGCAGCTACTAATCCTGACTTGGCCTGGCTGGAAGCACAAGAGGATGAGGAAGTAGGCTTTCCAGTCAGACCTCAGGTACCTTTAAGACCTATGACTTTTAAGGCAGCTGTAGATCTCAGCCACTTTTTAAAAGAAAAGGGGGGACTGGAAGGGTTAATTTACTCCAAGAAAAGACAAGAAATCCTTGATCTGTGGGTTTACCACACACAAGGCTTCTTCCCTGATTGGCAGAACTACACCCCAGGGCCAGGGATTAGATTCCCATTGACTTTTGGATGGTGCTTCAAGCTAGTACCAGTTGATCCAGATGAGGTAGAAAAGGCCAATGAAGGAGAAAACAACTGCTTGCTACACCCAATGAGCCAACATGGAATGGATGATGAAGACAGAGAAGTACTGAGATGGGAGTTTGACAGTCGTCTGGCATTTAGACACATAGCCAGAGAGAAACATCCTGAGTTCTATCAAAACTGATGACACAGGACACAGAGATTGCTGACACAGAAG
>A1.UA.01.01UAOD10.DQ823365_F2.CM.95.MP257.AJ249237
GCGAGAGCGTCAGTATTAAGCGGGGGAAAATTAGATGCATGGGAAAAAATTCGGTTAAGGCCAGGGGGAAAGAAACAATATAGAATAAAACACCTAGTATGGGCAAGCAGGGAGCTGGAAAGATTCGCGCTTAACCCTAGCCTTTTAGAAACAGCAGAAGGATGTCAACAAATAATGGAACAGTTCCAATCAACTCTCAAGACAGGATCAGAAGAACTTAAATCATTATATAATACAGTAGCAACCCTCTATTGTGTACATCAACGGATAGAGATAAAAGACACCAAGGAAGCTTTAGATAAAATAGAGGAAATACAAAATAAGAGCAAGCAAAAGACCCAACAGGCAGCAACTGGCACAGGAAGCAGCAGCAAGGTCAGTCAAAATTACCCCATAGTGCAAAATGCACAAGGGCAAATGACACACCAGTCCATGTCACCTAGGACTTTGAATGCATGGGTAAAAGTAATAGAAGAAAAGGCTTTCAGCCCAGAAGTAATACCCATGTTTTCAGCATTGTCAGAGGGAGCCACCCCACAAGATTTGAACATGATGCTGAACATAGTGGGGGGACACCAGGCAGCTATGCAAATGTTGAAAGATACCATCAATGAGGAAGCTGCTGAATGGGATAGGGTACATCCAGCACAGGCAGGGCCTGTTCCACCAGGACAAATGAGAGATCCAAGGGGAAGTGACATAGCAGGAACTACTAGTACCCTTCAAGAACAAATAGGATGGATGACAAGCAATCCACCTATCCCAGTGGGAGACATCTATAAAAGATGGATAATCCTAGGATTAAATAAGATAGTAAGAATGTATAGCCCTGTTAGCATTTTAGACATAAGACAAGGGCCAAAAGAACCCTTCAGAGACTATGTAGATAGGTTCTTTAAAACTCTTAGAGCTGAGCAAGCTACACAGGATGTAAAGAACTGGATGACAGAAACCCTGCTGGTCCAAAATGCAAATCCAGATTGTAAAACCATTTTAAGAGCATTAGGATCAGGGGCTACATTAGAAGAAATGATGACAGCATGCCAAGGAGTGGGAGGACCCGGCCATAAAGCAAGGGTTTTGGCCGAGGCAATGAGTCAAGTACAAAATGTAAACATAATGATGCAGAAAAGTAATTTTAGGGGCCCAAAAAGAATTAAGTGTTTCAACTGTGGCAAAGAAGGACACCTAGCCAGAAATTGCAGGGCCCCTAGGAAAAAGGGCTGTTGGAAATGTGGAAAGGAAGGCCATCAAATGAAAGACTGCACTGAGAGACAGGCTAATTTTTTAGGGAGAATTTGGCCTTCCAGCAAAGGGAGGCCAGGGAATTTTCCTCAGAGCAGACCAGAGCCATCAGCCCCACCAGCAGAAAACTTTGGGATGGGGGAAGAGATAACCCCCTCCCTGAAACAGGAACAGAAGGACAGGGAACAGCATCCTCCTTCAATTTCCCTCAAATCACTCTTTGGCAACGACCCCTTGTCACAGTAAAAATAGGAGGACAGCTAAAAGAAGCTCTATTAGATACAGGAGCAGATGATACAGTATTAGAAGACATAAATTTGCCAGGAAAATGGAAACCAAAAATGATAGGGGGAATTGGAGGTTTTATCAAGGTAAGACAGTATGATCAGATACTTATAGAAATTTGTGGAAAAAAGGCTATAGGTACGGTATTAGTAGGACCCACCCCTGTCAACATAATTGGAAGAAATATGTTGACTCAGCTTGGTTGTACTTTAAATTTTCCAATAAGTCCTATTGAAACTGTACCAGTAACATTAAAGCCAGGAATGGATGGCCCAAAGGTTAAACAATGGCCATTAACAGAAGAAAAAATAAAAGCATTAACAGACATTTGTAATGAGATGGAAAGGGAAGGAAAAATTTCAAAAATTGGGCCTGAAAATCCATACAATACTCCAGTATTTGCTATAAAGAAAAAGGACAGCACTAAGTGGAGGAAATTGGTAGATTTCAGGGAGCTCAATAAAAGAACTCAGGACTTTTGGGAAGTTCAATTAGGAATACCCCATCCAGCGGGTTTAAAAAAGAAAAAATCAGTAACAGTACTAGATGTGGGGGATGCATATTTTTCAGTTCCTTTAGATGAAAGCTTCAGAAAGTATACTGCATTCACTATACCAAGTATAAACAATGAGACACCAGGGATCAGATATCAGTACAATGTACTTCCACAGGGATGGAAAGGATCACCATCAATATTCCAGAGTAGCATGACAAAAATTTTAGATCCCTTTAGATCAAAAAATCCAGAAATAGTTATCTATCAATACATGGATGACTTGTATGTAGGCTCTGATTTAGAAATAGGGCAACATAGAACAAAAATAGAGGAGTTAAGAGCTCATCTATTGAGCTGGGGATTCACTACACCAGACAAAAAGCATCAGAAAGAACCTCCATTTCTTTGGATGGGATATGAACTCCATCCTGACAAATGGACAGTCCAGCCTATAATGCTGCCAGATAAAGACAGCTGGACTGTCAATGATATACAGAAATTAGTGGGAAAACTAAATTGGGCAAGTCAGATTTATCCAGGGATTAAAGTAAGGCAATTGTGTAAACTCCTCAGGGGAGCCAAAGCACTGACAGATATAGTGACACTGACTGAGGAAGCAGAATTAGAATTGGCAGAGAATAGAGAGATTCTAAAAGAACCTGTGCATGGAGTATATTATGACCCATCAAAAGATTTAGTAGCAGAAATACAGAAACAAGGACAAGACCAATGGACATATCAAATTTATCAGGAGCCATTTAAAAATCTAAAAACAGGAAAATATGCAAAAAAGGGGTCTGCTCACACTAATGATGTAAAACAATTAACAGCAGTGGTGCAAAAAGTGGTCACAGAAAGCATAGTAATATGGGGAAAGACTCCTAAATTTAGACTACCCATACAAAAAGAAACATGGGAAGCATGGTGGATGGAGTACTGGCAGGCCACCTGGATTCCTGAATGGGAGTTTGTCAATACCCCCCCTCTAGTAAAACTATGGTACCAGTTGGAGAAAGAACCCATAGTAGGAGCAGAGACTTTCTATGTAGATGGGGCAGCTAACAGGGAGACTAAGATAGGAAAAGCAGGGTATGTTACTGACAGAGGAAGACAAAAGGTTGTTCCTCTAACTGAGACAACAAATCAAAAGACTGAATTACATGCAATCCATCTAGCTTTGCAGGATTCAGGATCAGAAGTAAATATAGTAACAGACTCACAATATGCATTAGGAATTATTCAGGCACAACCAGACAGGAGTGAATCAGAGATAGTCAATAAAATAATAGAGAAACTAATAGAAAAAGAAAGAGTCTACCTGTCATGGGTACCAGCGCACAAGGGGATTGGAGGAAATGAACAAGTAGACAAATTAGTCAGTAATGGAATCAGGAGGGTGTTATTTTTAGAAGGGATAGATAAGGCTCAAGAAGAACATGAAAGATATCACAGCAATTGGAAAGCAATGGCTAGTGATTTTAATCTGCCACCTATAGTAGCAAAGGAAATAGTAGCCAGCTGTGATAAATGTCAACTAAAAGGGGAAGCTATGCATGGACAGGTAGACTGTAGTCCAGGGATATGGCAATTAGATTGCACACATCTAGAAGGAAAAGTAATCATAGTAGCAGTCCATGTAGCCAGTGGCTATATAGAAGCAGAAGTTATCCCAGCAGAAACAGGACAGGAGACAGCATACTTTCTGCTAAAATTAGCAGGAAGATGGCCAGTAAAAGTAGTACACACAGATAATGGCCCCAATTTCACCAGCAGTGCAGTTAAGGCTGCCTGTTGGTGGGCAGATATCCAACAGGAATTTGGGATTCCCTACAATCCCCAAAGTCAAGGAGTAGTGGAGTCTATGAATAAGGAATTAAAGAAAATCATAGGGCAGGTAAGAGAGCAAGCTGAACACCTTAAGACAGCAGTACAAATGGCAGTATTCATTCACAATTTTAAAAGAAAAGGGGGGATTGGGGGGTACAGTGCAGGGGAAAGAATAATAGATATAATAGCAACAGACATACAAACTAAAGAATTACAAAAACAAATTATAAAAATTCAAAATTTTCGGGTTTATTACAGGGACAGCAGAGACCCAGTTTGGAAAGGACCAGCAAAACTACTCTGGAAAGGTGAAGGGGCAGTAGTCATACAAGACAATAATGAAATAAAAGTAATACCAAGAAGAAAAGCAAAGATCATTAGGGATTATGGAAAACAGATGGCAGGTGATGATTGTGTGGCAGGTAGACAGGATGAAGATTAGAACATGGAACAGCTTAGTAAAACACCATATGTATATTTCAAAGAGAGCTGCAGGATGGTTTTATAGACATCACTATGAAAGCAGGCATCCAAGAGTAAGTTCAGAAGTACACATTCCACTAGAGGAAGATTCTAAATTAGTCATAATAACCTATTGGGGTCTACATACAGGAGAAAGAGACTGGCATTTGGGTCAAGGAGTCTCCATAGAATGGAGACAGAAAAGGTATAGGACACAAGTAGACCCTGGCTTGGCAGACCAACTAATTCATCTGCATTATTTTGATTGTTTTTCAGACTCTGCCATAAGGAAAGCCATATTAGGACAGAGAGTTAGCCCTAGGTGTAATTATCAAGCAGGACATAACAAGGTAGGATCCCTACAATATTTGGCACTAACAGCATTAATAACTCCAAAAAAGATAAAGCCGCCTTTACCTAGTGTCAGGAAACTAGTAGAGGATAGATGGAACAACCCCCAGAAGACCAGGGGCCACAGAGGGAGCCATACAATGAATGGACACTAGAGCTTCTAGAGGAGCTTAAGCATGAAGCTGTTAGACATTTTCCTAGGGAGTGGCTCCATGGCTTAGGACAGCATATCTATAACACCTATGGGGATACTTGGGAGGGAGTTGAAGCTATAATAAGGATACTGCAACAACTACTATTTATCCATTTCAGAATTGGGTGCCATCATAGCAGAATAGGCATTATTCGACAAAGAAGAATAAGAAATGGAAGTGGTAGATCCTAACCTAGATCCCTGGAAACATCCAGGGAGTCAGCCTGAGACTCCGTGTAATAAATGCTATTGTAAAAAGTGTTGCTTTCATTGCCAACTGTGCTTTACAAGGAAGGGCTTAGGCATCTCCTATGGCAGGAAGAAGCGGAGACAGAGACGAAGAACTCCTCAAAGCGGTGAGGTACATCAAGATCCTGTATCAAAGCAGTAAGTAGTACATGTAATGTCACTTTCGCTAATAGTAGTAATAGCAGCATATATAGTAGTGCTAATACTAGCAATAATTGTGTGGACTATAGTATATATAGAATATAAGAAAATATTAAGGCAAAAAAGAATAAATAGGTTATATGAAAGAATAATAGAGAGAGCAGAAGACAGTGGAAATGAGAGTGAGGGAGATGCAGAGGAATTGGCAGCACTTGGGGAGGTGGGGCCTCTTATTCCTGGGGATATTAATAATCTGTAGTGCTGCAGATAAGTTGTGGGTCACAGTCTATTATGGAGTACCTGTGTGGAAAGAAGCAACCACTACTCTATTTTGTGCATCAGATGCTAAAGCATATGAAAGAGAGGTACATAATGTCTGGGCTACATATGCCTGTGTACCTACAGACCCAAGCCCACAAGAATTGGTTCTTGGAAATGTATCAGAAAAATTTAACATGTGGAAAAATAACATGGTAGACCAAATGCATGAAGATATAATCAGTTTATGGGATGAGAGCCTAAAGCCATGTGTAAAGTTAACCCCACTCTGTGTTACTTTAAATTGTACTAAGGCTATCATTAATGTCACCTCTTCTAATAATACCACCTTGGCTCCTAATGTTACCATCTCGGAGGAAATGAAAAACTGTTCTTTCAATATAACCACAGAGATAAGAGATAAGCAGAAAAAAGAATATGCACTTTTTTATAAACTTGATGTAGTACAAATCAATAACAGTAATACTAGTTATAGGCTAATAAATTGTAATACCTCAACCCTTACACAGGCTTGTCCCAAGGTGTCCTTTGACCCAATTCCCATACATTATTGTGCTCCTGCTGGCTTTGCGATTCTAAAGTGTAATAATAAAACATTCAATGGGACAGGATTATGCAGGAATGTTAGCACAGTACAATGTACACATGGAATTAAACCAGTGGTATCAACTCAACTACTGTTAAATGGCAGCCTAGCAGAAGAAAAGATGATAATTAGATCTGAAAATATCTCAGATAATACAAAAACCATAATAGTACAGTTTAAAAATCCTGTAAAAATTAATTGTACAAGACCCAACAACAATACAAGAAGAAGTATACATATAGGACCAGGACGAGCATTCTATGCAACAGGTGAGATAATAGGAGATACAAGAAAGGCACATTGTAACATTAGTGAAAAACAGTGGTATGACACTTTAATAAAGATAGCTACAGAGTTCAAAGACCAATATAATAAAACAGTAGGGTTTCAACCATCAGCAGGAGGGGATCTAGAAATTACAACACATAGTTTTAATTGTAGAGGAGAATTTTTCTACTGCAACACAACTATTCTGTTTAATCACACAAGAGTAAATGACATTCTGTCTAATAATCACACGAGAGAAAATGACACTATCACTCTTCCATGTAGAATAAAACAAATTGTAAACATGTGGCAAAGAGTAGGACAGGCAATGTATGCCCCTCCCATTGCCGGAAAAATTCAGTGTAACTCAAATATCACAGGTCTACTATTAACAATAGATGGTGGGGAGGGAAATGAGTCCGAGACCCTCAGACCTGGAGGGGGAGATATGAGAGACAATTGGAGAAGTGAACTATATAAATATAAGGTAGTAAAAATTGAACCACTAGGAGTAGCACCCACCAAGGCAAAAAGACAAGTGGTGCAGAGAGAAAAAAGAGCAGTGGGAATGGGAGCTATGTTCCTTGGGTTCTTGGGAGCAGCCGGAAGCACTATGGGCGCGGCGTCAATAACGCTGACGGTACAGGCCAGAAACTTATTGTCTGGTATAGTGCAGCAGCAAAGCAATTTGCTGAAAGCTATTGAAGCGCAACAGCATCTGTTGCAGCTCACAGTCTGGGGCATTAAACAGCTCCAGGCGAGAATCCTGGCTGTGGAAAGATACCTAAAGGACCAACAGCTCCTAGGGATTTGGGGCTGCTCTGGAAAACTCATCTGCCCAACTACTGTGCCTTGGAATCTTAGTTGGAGTAATAAATCTCAAGATGAAATTTGGGGAAACATGACATGGATGGAATGGGAAAAGGAGATTGGCAATTACACAGACACAATATACAGATTAATTGAAAGTGCACAAAATCAGCAGGAAAAGAATGAACAGGACTTATTGGCATTGGACAAGTGGGACAATCTGTGGAATTGGTTTTCTATAACAAGATGGTTGTGGTACATAGAAATATTCATAATGATAATAGGAAGCTTGATAGGATTAAGAATAGTTTTTACTGTGCTTTCTATAATAAATAGAGTTAGGCAGGGATACTCACCTTTGTCATTGCAGACCCTTATCCCAAACTCGAGGGGACCCGAAAGGCCCGGAGGAATCGAAGAAGAAGGTGGAGAGCAAGACAAAGACAGATCCATCAGATTAGTGAGCGGATTCTTAGCACTTGCCTGGGACGACTTCAGGAGCCTGTGCGTCTTCAGCTACCACTGCTTGAGAAACTTCATATTAATTGCAGCGAGGACTGTGGACAAGGGACTGAAAAGGGGGTGGGAAGTCCTCAAATATCTGTGGAATCTCGCGCAGTATTGGGGTCAGGAACTAAAGAATAGTGCTATTAGTCTGTTGGATAGAACAGCAATAGCAGTAGCTGAAGGAACAGATAGAATCATAGAAATTTTGCAAAGAGCTGGTAGAGCTGTTCTCAACATACCTAGAAGAATAAGACAGGGTCTTGAAAGAGCTTTGCTATAAAATGGGTGGCAAGTGGTCAAAAAGTAGTATAGTTGGATGGCCTGCTATAAGGGAAAGAATAAGAGCAGCAGAAGGGGTAGGAGCAGTGTCTCAAGACTTAGATAAACGTGGGGCAATTACAAACAGCAATACTGGGGCTACTAATGCTGACTTGGCCTGGCTAGAAGCGCAAGAGGAGGAAGTAGGTTTTCCAGTCAGACCTCAGGTACCTTTAAGACCAATGACTTATAAGGCAGCCCTGGATCTCAGTCACTTTTTAAAAGAAAAGGGGGGACTGGAAGGGTTAATTTACTCCAGGAAAAGACAAGAAATTCTTGATTTGTGGGTCTACCACACACAAGGCTACTTCCCTGATTGGCAGAACTACACACCAGGGCCAGGGCCCAGATTTCCACTGACCTTTGGATGGTGCTTCAAGCTAGTACCAGTTGATCCAGAGGAGGTAGAAAAGGCCAATGAAGGAGAGAACAACTGTTTGTTACACCCTATGAGCCTACATGGAATGGAGGATGACGACAAGGAAGTGTTAAAGTGGCAGTTTGACAGCCGCCTAGCGCTGAGACATATAGCCAGAGAGAGACATCCGGAGTACTACAAAGAC
>A1.KE.00.KNH1199.AF457067_F2.CM.02.02CM_0016BBY.AY371158
GCGAGAGCGTCAGTATTAAGCGGGGRAAAATTAGCTGCATGGGAGAAGATTCGGTTAAGGCCAGGGGGAAGGAAAAGATATCGCATAAAACATTTAGTATGGGCAAGCAGGGAGCTGGAAAGATTTGCACTCAACCCTAGCCTTTTAGAAACAGCAGAAGGATGTCAACAAATAATGGAACAGTTACAACCAGCTCTCAAGACAGGAACAGAAGAACTTAGATCATTATTTAATACAGTAGCAACCATCTATTGCGTGCATCAACGAATAGATGTGAAAGACACCAAGGAAGCTCTAGATAAAATAGAGGAAATGCAAAAGAAGAGCAAGCAAAAGACACAACAGGCAGCAGCTGACACAGGACACAGCAGCCAGGTCAGCCAAAATTACCCTATAGTACAAAATGCACAAGGGCAAATGGTACACCAGGCAGTATCACCTAGGACTTTGAATGCATGGGTAAAAGTAATAGAAGAAAAGGCTTTCAGCCCAGAAGTAATACCCATGTTCTCAGCATTATCAGAAGGAGCCACCCCACAAGATTTAAATATGATGCTGAACATAGTGGGGGGACATCAGGCAGCTATGCAAATGTTAAAAGATACCATCAATGAGGAAGCTGCAGAATGGGACAGGTTACATCCAGTACATGCAGGGCCTATTCCACCAGGCCAGATGAGAGAACCAAGGGGAAGTGACATAGCAGGAACTACTAGTACCCCTCAAGAACAAATAGGGTGGATGACAGGCAACCCACCCATCCCAGTGGGAGACATCTATAAAAGATGGATAATCCTGGGATTAAATAAAATAGTAAGAATGTATAGCCCTGTTAGCATTTTAGATATAAAACAAGGGCCAAAAGAACCCTTCAGAGATTATGTGGATAGGTTCTTTAAAACTCTCAGAGCTGAGCAAGCTACACAGGAGGTAAAAAATTGGATGACAGAGACATTACTGATCCAAAATTCAAATCCAGATTGTAAGTCCATCTTAAGAGCATTAGGACCAGGGGCTACATTAGAAGAAATGATGACAGCATGCCAGGGAGTGGGAGGACCCGGCCATAAAGCAAGGGTTTTGGCTGAGGCAATGAGTCAGGTACAACAGCCAAACATAATGATGATGCAAAGAGGTAATTTTAGGGGCCAGAAAAAGATTAAGTGTTTCAACTGTGGCAAAGAAGGACACCTAGCCAGAAATTGCAGGGCCCCTAGGAAAAAGGGCTGTTGGAAATGTGGAAAGGAGGGACACCAAATGAAAGACTGCACTGAAAGACAGGCTAATTTTTTAGGGAGAATTTGGCCTTCCAGCAAAGGGAGGCCAGGGAATTTTCCTCAGAACAGATTGGAGCCAACAGCCCCACCAGCAGAGATCTGTGGGATGGGGGAAGAGATAGCCTCCCCTCCGAAGCAGGAGCAGAGAGACAAGGAACAGGCCTCACCTTCAGTTTCCCTCAAATCACTCTTTGGCAACGACCTATTGTCACAGTAAGAATAGGGGGACAGCTAAAAGAAGCTCTATTAGATACAGGAGCAGATGATACAGTATTAGAAGATATAGATCTGCCAGGAAAATGGAAGCCAAAAATGATAGGGGGAATTGGAGGATTCATCAAAGTAAGACAGTATGATCAGATACTTATAGAAATTTGTGGAAAAAAGGCTATAGGTACAGTATTAGTAGGACCTACACCTGTCAACATAATTGGAAGGAACATGTTGACCCAGATTGGTTGTACTTTAAATTTCCCAATTAGTCCTATTGAAACTGTACCAGTAAAATTAAAGCCAGGTATGGATGGCCCAAAGGTTAAACAATGGCCATTGACAGAAGAAAAAATAAAAGCATTAACAGAAATTTGTACAGATATGGAAAAGGAAGGAAAAATTTCAAGAATTGGGCCTGAAAATCCATACAATACTCCAATATTTGCAATAAAGAAAAAGGATAGCACTAAATGGAGGAAATTAGTAGATTTCAGAGAGCTCAATAAAAGAACACAAGACTTGTGGGAAGTTCAATTAGGAATACCACATCCATCGGGCCTAAAAAAGAAAAAATCAGTAACAGTACTAGATGTGGGGGACGCATATTTTTCAGTTCCTTTAGATGAGAACTTTAGAAAATATACTGCATTCACCATACCTAGTACAAACAATGAGACACCAGGAATCAGATATCAGTACAATGTGCTTCCACAGGGATGGAAAGGATCACCAGCAATATTCCAGAGTAGCATGACAAAAATCTTAGAGCCCTTTAGATTAAAAAATCCAGAAATAATTATTTATCAATACATGGATGACTTGTATGTAGGATCTGATTTAGAAATAGGGCAGCATAGAGCAAAAATAGAAGAGTTAAGAGCTCATCTATTGAGCTGGGGATTTACTACACCAGACAAAAAGCATCAGAAAGAACCTCCATTCCTTTGGATGGGATATGAGCTCCATCCTGACAAGTGGACAGTCCAGCCTATAGTGCTGCCAGAAAAAGAAAGCTGGACTGTCAATGATATACAGAAATTAGTGGGAAAACTAAATTGGGCAAGTCAAATTTATGCAGGGATTAAAGTAAGGCAGTTGTGTAAACTCCTCAGGGGAGCCAAAGCACTAACAGATGTAGTAACATTGACTGAGGAAGCAGAATTAGAATTGGCAGAGAACAGGGAGATACTAAGAGACCCTGTGCATGGAGTATATTATGACCCATCAAAAGACTTAATAGCAGAAATACAGAAACAAGGGCAAGACCAATGGACATACCAAATTTATCAAGAGCCATTTAAAAATCTAAAAACAGGAAAATATGCAAGAAAAAAGTCTGCTCACACTAATGATGTAAGACAATTAGCAGAGGTGGTGCAAAAGGTAGTCATGGAAAGCATAGTCATATGGGGAAAGACTCCTAAATTTAGACTACCCATACAAAAAGAGACATGGGAAACATGGTGGATGGACTATTGGCAGGCTACCTGGATTCCTGAATGGGAGTTTGTCAATACCCCTCCTCTAGTAAAATTGTGGTACCAATTAGAAAAAGACCCTATAGCAGGAGCAGAGACTTTCTATGTAGATGGGGCAGCCAATAGGGAGACTAAGCTAGGAAAAGCAGGGTATGTCACTGACAGGGGAAGACAAAAGATTGTTTCCCTAACTGAAACAACAAATCAAAGGACTGAACTACATGCAATCTATCTAGCTTTGCAGGATTCAGGATCAGAAGTAAATATAGTAACAGACTCACAATATGCATTAGGAATCATTCATGCACAACCAGACAGAAGTGACTCAGAGTTAGTCAATCAGATAATAGAGAAGCTAATAGGAAAGGACAAAGTATACCTGTCATGGGTTCCAGCACACAAAGGAATTGGAGGAAATGAACAAGTAGATAAATTAGTCAGTTCCGGAATCAGAAAGGTGCTGTTTTTAGATGGGATAGATAAAGCTCAAGAAGAACATGAAAGATATCACAGCAATTGGAGAGCAATGGCTAGTGATTTTAATTTGCCACCTATAGTAGCAAAGGAGATAGTAGCCAGCTGTGATAAATGTCAGCTAAAAGGGGAAGCCATGCATGGACAAGTAGACTGCAGTCCAGGGATATGGCAATTAGATTGCACACATCTAGAAGGAAAAGTAATACTGGTAGCAGTTCATGTAGCCAGTGGCTATATGGAAGCAGAAGTTATCCCAGCAGAAACAGGACAAGAGACAGCATACTTTATACTAAAACTAGCAGGAAGATGGCCAGTAAAAGTAGTACACACAGACAATGGCAGCAATTTCACCAGTGCTGCAGTTAAAGCAGCCTGTTGGTGGGCAAATATCAAACAGGAATTTGGGATTCCCTACAATCCCCAAAGTCAAGGAGTAGTGGAATCTCTAAATAAGGAATTAAAGAAAATTATAGGACAGGTAAGAGAGCAAGCTGAACATCTTAAAACAGCAGTACAAATGGCAGTATTCATTCACAATTTTAAAAGAAAAAGGGGGATTGGGGGGTACAGTGCAGGGGAAAGAATAATAGACATAATAGCAACAGACATACAAACTACAGAATTACAAAAACAAATTACAAAAATTCAAAATTTTCGGGTTTATTACAGGGACAGCAGAGATCCAATTTGGAAAGGACCAGCAAAACTACTCTGGAAAGGTGAAGGGGCAGTAGTAATACAGGACAATGGTGATATAAAGGTAGTACCAAGAAGAAAAGTAAAAATCATTAGGGATTATGGAAAACAGATGGCAGGTGATGATTGTGTGGCAGGTAGACAGGATGAGGATTAGAACATGGAACAGTTTAGTAAAACACCATATGTATGTTTCAAGGAGAGCTCAAGGATGGTTTTATAGACATCACTATGAAAGCAGGCATCCAAGAGTAAGTTCAGAAGTACACATCCCTCTAGAGAATGATTCTAAATTAGTAATAGTAACCTATTGGGGTCTACATACAGGAGAAAAAGATTGGCATTTGGGTCATGGAGTCTCCATAGAATGGAGGCAGAAAAGGTATAGGACACAAGTAGATCCTGGCTTGGCAGACCAACTAATTCATAAATATTATTTTGATTGTTTTTCAGAATCTGCCATAAGGAAAGCCATATTAGGACATAGAGTTAGTCCTAGGTGTAACTATCAAGCAGGACATAACAAGGTAGGATCCCTACAATATTTGGCACTAACAGCACTAGTAACCCCAAAGAAGGTAAAGCCGCCTTTGCCTAGTGTCAAGAAACTAGTAGAGGATAAATGGAACAACCCCCAGAAGACCAAGGGCCACAGAGGGAGCCATACAATGAATGGACACTAGAGCTTTTAGAGGAGCTTAAGCATGAAGCTGTTAGACATTTTCCTAGAGAGTGGCTCCATGGCTTGGGACAGCATATCTATAATACCTATGGGGATACTTGGGAGGGAGTTGAAGCTATAATAAGGACACTGCAACAACTACTATTTATCCATTTCAGAATTGGGTGCCATCATAGCAGAATAGGCATTATTCGACAAAGAAGAATAAGAAATGGAAATGGTAGATCCTAAACTAGATCCCTGGAACCATCCAGGAAGTCAGCCTAAGAATCCTTGTAATAAATGTTATTGTAAAAGGTGTTGCTTTCATTGCCAACTGTGCTTTACAAGCAAGGGCTTAGGCATCTCCTATGGCAGGAAGAAGCGGAGACAGCGACGAAGCGCTTCTCACAGCAGTAAGGACCATCAAGATCCTGTATCAAAGCAGTAAGTAGTATATGTAATGTCATATTTGATAATATTAGTAATAGTAGCATTTATAGTAGCGCTAATAGCAGCAATAATTGTGTGGACTATAGTATATATAGAATATAAGAAACAGTTAAGGCAAAAAAGAATAAATAGGTTATATGAAAGAATAAGAGAAAGAGCAGAAGACAGTGGCAATGAGAGTGAGGGGGATGCAGAGGAATTGGCAGCACTTGGGGAAGTGGGGCTTTTTATTCCTGGGAATATTAATAATCTGTAATGCTGCAGATAACTTGTGGGTCACAGTCTATTATGGAGTACCAGTGTGGAAAGAAGCAACCACTACTCTATTTTGTGCATCGGATGCTAAAGCATATGAAAAAGAGGCACATAATGTCTGGGCTACACATGCCTGTGTACCTACAGACCCTGACCCACAAGAAATATTTCTGGACAATGTAACAGAAAATTTTAACATGTGGAAAAATAACATGGTAGACCAGATGCATGAAGATATAATCAGTTTATGGGATCAAAGCCTAAAACCATGTGTAAAGATAACCCCACTCTGTGTTACCTTACACTGTAGTGATGTTAATATTACGGCTAATAATACCAATCAGCCTAATAACATCACCCTGGAAGAGCAAGGGGAAATAAAAAACTGTTCTTTCAATATCACCACAGAGATAAAAGATAAGAGGAAAAATGAATTTGCAACTTTTTATAAACATGATATAGTACCAATTGAAAAAAATACGACATCCTATAGGCTAACAAGTTGTAATACCTCAACCGTTACACAGGCTTGTCCGAAGGTGTCCTTTGATCCAATTCCTATATATTATTGTGCTCCTGCTGGTTATGCGATTCTAAAGTGTAATGATAAAAGGTTCAATGGGAAAGGGTTATGCACGAATGTCAGCACAGTACAATGTACACATGGAATTAAACCAGTGGTATCAACTCAACTACTGTTAAATGGCAGCTTAGCAGAAAAAAATATAATAATTAGATCTGAAAATATCACAGATAATGCAAAAACCATAATAGTACAGTTTAATGAATCAGTAAAAATTAACTGTACAAGACCCAACAACAATACAAGAAAAAGTATACGTATAGGACCAGGACAAGTATTTTATGCAACAGGTGAGATAATAGGAGACATAAGAAAGGCACATTGTACCATTAATGGAACACTGTGGAATGCAACTTTAAATAGGGTAGCTGCAGAGGTCAAAAACCTCACTAATATTACAATAAAATTTGAGCCATCATCAGGAGGGGACCTAGAAGTTACAACACATAGTTTTAGTTGTGGAGGAGAGTTTTTCTACTGCGACACAACAGCACTGTTTAACACAACATTACTTAACACAACAATGGATAATAATGGTACTATCATTATTCCATGTAGAATAAAACAAATTGTAAACGTGTGGCAAAGAGTAGGGCGAGCAATGTATGCCCCTCCCATTGCAGGAAAAATTCAGTGCAACTCAAATATCACAGGTCTACTATTGACAAGAGATGGTGGAAGTAAGGCAAATAACACAGACATCCTCAGACCTATAGGGGGAGAGATGAGAGACAATTGGAGAAGTGAATTATATAAATATAAGGTAGTACAAATTCAACCACTAGGAATAGCACCCTCCAGGGCAAAAAGACAAGTGGTGAAGAGAGAAAGAAGAGCAGTAGGAATAGGAGCTGTGTTCCTTGGGTTCTTGGGAGCAGCAGGAAGCACTATGGGCGCAGCGTCAATAACGCTGACGGTACAGGCCAGACAATTATTGTCTGGTATAGTGCAACAGCAAAACAATTTGCTGAAGGCTATAGAAGCGCAACAGCATCTGTTGCAGCTCACAGTCTGGGGCATTAAACAGCTCCAGGCGAGAATCCTGGCTGTGGAAAGATACCTAAAGGACCAACAGCTCCTAGGGATTTGGGGCTGCTCTGGAAAGCTCATCTGCACCACTAATGTGCCCTGGAATTCTAGTTGGAGTAATAAATCTCAGGAAGAAATTTGGGGAAACATGACGTGGATGCAGTGGGAAAAAGAGATCGATAATTACACAGACACAATATACAGATTAATAGAGGAGGCGCAAAACCAGCAGGAAAAGAATGAACAGGACTTATTGGCATTGGACAAGTGGGACAGTCTGTGGAGTTGGTTTACTATAACAAACTGGTTGTGGTACATAAGAATATTCATCATGGTAGTAGGAGGCTTGATAGGATTAAGAATAGTTTTTGCTGTGCTTTCTATAATAAATAGGGTTAGGCAGGGTTATTCACCTTTGTCATTACAGACCCTTATCCCAAGCCCGAGGGGACCCGACAGGCCCGGAGGAATCGAAGAAGAAGGTGGAGAGCAAGACAAAGACAGATCCGTGAGATTAGTGAGCGGATTCTTAGCACTTGCCTGGGACGATCTGCGGAGCCTGTGCCTCTTCAGCTACCGCCACTTGAGAGACTTCATATTGATTGCAGCGAGGACAGTGGACAGGGGACTGAAAGGGGGGTGGGAAGTCCTCAAATATCTGTGGAATCTCGCTCAGTATTGGGGTCGGGAACTGAAAATTAGTGCTATTAGTCTGCTTAACACCACAGCAATAGTGGTAGCTGAAGGGACAGATAGAGTCATAGAAATTCTGCAAAGAGCTGGTAGAGCTATTCTCCACATACCTAGAAGAATAAGACAGGGTTTCGAAAGGGCTTTGCTATAAAATGGGTGGCAAGTGGTCAAAAAGTAGTATAGTTGGATGGCCTAAGGTAAGGGAAAGAATGAGACAAACCCCTGTAGCAGCAGAAGGGGTGGGAAAGGTGTCTCAAGACTTAGATAAACATGGGGCAATTACAAGCAGCAATACTGGGGCTACTAATAATGACATAGCCTGGCTGGAAGCGCAAGAAGATGAGGAAGTAGGTTTTCCAGTCAGACCTCAGGTACCTTTAAGACCAATGACTTTCAAGGGAGCTGTCGATCTCAGTCACTTTTTAAAAGAAAAGGGGGGACTGGATGGGTTAATCTACTCCAGGAAAAGACAAGAAATCCTTGATCTATGGGTCTATCACACACAAGGCTACTTCCCTGATTGGCAGAACTACACACCAGGGCCAG
>A1.RW.92.92RW008.AB253421_G.NG.01.01NGPL0760.DQ168579
TGGAAGGGCTAATTTACTCCAAGAAAAGACAAGACATCCTTGATCTGTGGGTCTACCACACACAAGGCTTCTTCCCTGATTGGCAGAATTATACACCAGGGCCAGGGACCAGATTCCCACTAACATTTGGGTGGTGCTTCAAGCTAGTACCAGTTGATCCAGAGGAAGTAGAGAAGGCTACAGAGGGAGAGGACAACTGCCTATTACACCCTATATGCCAGCATGGAATGGAGGATGAGGAGAAAGAAGTATTAAAGTGGCAGTTTGACAGCCGCCTGGCACTAAAACACAGAGCCCGAGAGCTGCATCCGGAGTTCTACAAAGACTGCTGACACAGAAGTTGCTGACAGGGACTTTCCGCTGGGGACTTTCCAGGGGAGGTGTGGTTTGGGCGGAGTTGGGGAGTGGCCAACCCTCAGATGCTGCATATAAGCAGCTGCTTTTCGCCTGTACTGGGTCTCTCTGGTTAGACCAGATCGAGCCTGGGAGCTCTCTGGCTAGCAAGGGAACCCACTGCTTAAGCCTCAATAAAGCTTGCCTTGAGTGCTTCAAGTAGTGTGTGCCCGTCTGTTGTGTGACTCTGGTAACTAGAGATCCCTCAGACCACTCTAGATTGAGTAAAAATCTCTAGCAGTGGCGCCCGAACAGGGACTTGAAAAGCGAAAGTAACAGGGACTCGAAAGCGAAAGTTCCAGAGAAGTTCTCTCGACGCAGGACTCGGCTTGCTGAGGTGCACACAGCAAGAGGCGAGAGCGGCGACTGGTGAGTACGCCATTTTTTGACTAGCGGAGGCTAGAAGGAGAGAGATGGGTGCGAGAGCGTCAGTATTAAGTGGGGGAAAATTAGATGCATGGGAAAAAATTCGGTTAAGGCCAGGGGGAAAGAAAAAATATAGAATGAAACATCTAGTATGGGCAAGCAGGGAGCTGGAAAGATTTGCACTTAACCCTGGCCTTTTAGAAACAACAGAAGGATGTCAAAAAATAATAGAACAGTTACAACCATCTGTCAAGACAGGAACAGAAGAACTTAAATCATTATTTAATACAGTAGCAACCCTCTATTGCGTACATCAACGGATAGATGTAAAAGACACCAAGGAAGCCCTAGATAAAATAGAGGAAATGCAAAATAAGAGCAAGCAAAAGACACAACAGGCAGCAGCTGACATAGGAAATAGCAGCAAGGTCAGCCAAAATTACCCTATAGTGCAAAATGCACAAGGGCAAATGATATATCAGTCCATGTCACCTAGGACTTTGAATGCATGGGTGAAAGTAATAGAAGAAAAGGGTTTCAACCCAGAAGTAATACCCATGTTCTCAGCATTATCAGAAGGAGCCACCCCACAAGATTTAAATATGATGCTAAACATAGTGGGGGGACATCAGGCAGCTATGCAAATGTTAAAAGATACCATCAATGAGGAAGCTGCAGACTGGGACAGGTTACATCCAGTACAGGCAGGGCCTATTCCACCAGGCCAGATGAGAGAACCAAGGGGAAGTGACATAGCAGGAACTACTAGTACCCCTCAAGAACAAATAGGATGGATGACAAGCAACCCACCTATCCCAGTGGGAGACATCTATAAAAGATGGATAATCCTGGGATTAAATAAAATAGTAAGAATGTATAGCCCTGTTAGCATTTTGGATGTAAAACAAGGGCCAAAAGAACCCTTTAGAGATTATGTAGATAGGTTCTTTAAAATTCTCAGAGCTGAACAAGCTACACAGGATGTAAAACATTGGATGACAGAAACATTGCTGATCCAAAATGCAAATCCAGATTGTAAGTCCATTTTAAGAGCATTAGGAACAGGGGCTACATTAGAAGAAATGATGACAGCATGTCAGGGAGTGGGAGGACCCAGCCATAAAGCAAGGGTTTTAGCTGAGGCAATGAGTCAAGTACAACATCCAAACATAATGATGCAGAGAGGCAATTTTAGGGGCCAGAAAAGGATTAAGTGCTTCAACTGTGGCAAAGAAGGACACCTAGCCAGAAATTGCAGGGCCCCTAGGAAAAAGGGCTGTTGGAAATGTGGAAAGGAGGGACACCAAATGAAAGACTGCACTGAAAGACAGGCTAATTTTTTAGGGAAAATTTGGCCTTCCAGCAAGGGGAGGCCAGGAAATTTTCCTCAGAGCAGACCGGAGCCATCAGCCCCACCAGCAGAGATCTTTGGGATAGGGGAAGAGATAGCCTCCCCTCCGAAGCAGGAGCAGAAAGACAGGGAACCGGCCCAACCTTTAGTTTCCCTCAAATCACTCTTTGGCAACGACCCCTTGTCACAGTAAGAATAGGGGGACAGCTAAAAGAAGCTCTATTAGATACAGGAGCAGATGATACAGTATTAGAGGACATAAATTTGCCAGGAAAATGGAAACCAAGAATGATAGGGGGAATTGGAGGTTTCATCAAGGTAAAACAGTATGATCAGATACTTATAGAAATTTGTGGAAAAAAGGCTATAGGTACAGTATTAGTAGGACCTACACCTGTCAACATAATTGGAAGGAATATGTTGACCCAGATTGGTTGTACTTTAAATTTCCCAATTAGTCCTATTGAGACTGTACCAGTAAAATTAAAGCCAGGAATGGATGGGCCAAAGGTTAAACAATGGCCATTGACAGAAGAAAAAATAAAAGCATTAACAGAAATTTGTTCAGAGATGGAAAAGGAAGGGAAAATTTCAAGAATTGGGCCTGAAAATCCATACAATACTCCAATATTTGCTATAAAGAAAAAAGACAGCACTAAATGGAGAAAATTAGTAGATTTCAGAGAGCTCAATAAAAGAACACAAGACTTTTGGGAAGTTCAATTAGGAATACCGCATCCAGCGGGCCTAAAAAAGAAAAAATCAGTAACAGTACTGGACGTGGGGGATGCTTATTTCTCAGTTCCTTTAGATGAAAGCTTTAGAAAGTATACTGCATTCACCATACCTAGTACAAACAATGAGACACCAGGAACCAGGTATCAGTACAATGTGCTTCCACAGGGATGGAAAGGATCACCGGCAATATTCCAGAGTAGCATGACAAGAATCTTAGAGCCCGTTAGATCAAAAAATCCGGACATAATTATCTATCAATATATGGATGACTTGTATGTAGGATCTGATTTAGAAATAGGGCAGCATAGAGCAAAAATAGAAGAGTTAAGAGCTCATCTCTTGAGCTGGGGATTTACTACACCAGACAAAAAGCATCAGAAAGAACCTCCATTCCTTTGGATGGGATATGAGCTTCATCCTGACAAATGGACAGTCCAGCCTATAGTGCTGCCAGACAAAGACCACTGGACTGTCAATGATATACAGAAATTAGTGGGAAAACTAAATTGGGCAAGTCAAATTTATCCAGGGATTAAAGTAAAGCAACTGTGTAAACTCCTCAGGGGAGCCAAAGCACTAACAGATATAGTAACATTGACTGAAGAAGCAGAATTAGAATTGGCAGAGAACAGGGAGATTCTAAAAGAACCTGTGCATGGGGTATATTATGACCCATCAAAAGACTTAATAGCAGAAATACAAAAACAAGGGCAAGACCAATGGACATACCAAATTTATCAAGAGCCATATAAAAATCTGAAAACAGGAAAGTATGCAAAAAGGGGGTCTGCCCACACTAATGATGTAAAACAATTAACAGAAGTAGTGCAAAAAATATCCACAGAGAGCATAGTAATATGGGGAAAAGTTCCTAAATTTAGACTACCTATAAGGAAAGAAACATGGGAAGTATGGTGGACAGAATATTGGCAGGCCACCTGGATTCCTGATTGGGAATTTGTCAACACCCCTCCTCTAGTAAAGTTATGGTATCGATTAGAAACAGAACCCATACCAGGAGCAGAAACTTACTATGTAGATGGGGCAGCTAATAGGGAAACAAAATTAGGAAAGGCAGGATATGTTACTGACAAAGGAAAACAAAAAGTTATCACCATACAGGAAACAACAAACCAAAAGACTGAATTACATGCAATTCAGCTAGCTTTGCAGGACTCAGGATCAGAAGTAAACATAGTAACAGATTCACAGTATGCATTAGGAATCATTCAAGCACAACCAGATAAAAGTGAATCAGAATTAGTTAACCAAATAATAGAACAGCTAATAAAAAAGGAAAGGGTCTACTTGACATGGGTACCAGCACACAAAGGAATTGGGGGAAATGAACAAGTAGATAAACTAGTCAGTAGTGGAGTCAGAAAAGTACTATTTTTAGATGGCATAGATAAAGCTCAAGAAGAACATGAAAGATATCACAGCAATTGGAGAGCAATGGCTAGTGATTTTAATCTGCCACCTATAGTAGCAAAAGAAATAGTGGCCAGCTGTGACAAATGTCAGCTAAAAGGAGAAGCCGTGCATGGACAGGTAGACTGTAGTCCAGGAATATGGCAATTAGATTGTACACATTTAGAAGGAAAAATTATCCTAGTAGCAGTCCATGTAGCCAGTGGCTATATAGAAGCAGAAGTTATCCCAGCAGAAACAGGACAGGAAACAGCATACTTTATATTAAAATTAGCAGGAAGGTGGCCAGTAAAAGTAATACATACAGACAATGGCAGCAATTTCACCAGTAATACAGTAAAGGCAGCTTGTTGGTGGGCAAATATTACACAAGAATTTGGAATTCCCTACAATCCCCAAAGCCAAGGAGTAGTGGAATCTATGAATAAAGAATTAAAGAAAATTGTTGGGCAGGTCAGAGATCAAGCTGAACACCTTAAGACAGCAGTACAAATGGCAGTATTCATTCACAATTTTAAAAGAAAAGGGGGGATTGGGGGGTACAGTGCAGGGGAAAGGATAATAGACATAATAGCATCAGATTTACAAACTAAAGAACTACAAAAACAAATTACAAAAATTCAAAATTTTCGGGTTTATTACAGGGACAGCAGAGACCCAATTTGGAAAGGACCAGCAAAACTACTCTGGAAAGGTGAAGGGGCGGTAGTAATACAAGACAATAACGAAATAAAAGTAGTACCAAGAAGAAAAGCAAAGATCATTAGGGATTATGGAAAACAGATGGCAGGTGATGATTGTGTGGCAGGTAGACAGGATGAGGATTAGAACCTGGAACAGTTTAGTAAAACATCATATGTATATCTCAAGGAAAGCTAAAGGCTGGTTTTATAGACATCACTATGAAAGCAGGCATCCAAAAGTAAGTTCAGAAGTACACATTCCACTAGGAGAGGCTAAAATAGTAGTAAGAACATACTGGGGTCTGCATACAGGAGAAAAAGACTGGCAATTGGGTCATGGGGTCTCCATAGAATGGAGGCAGAGAAAGTATAGCACACAAATAGATCCTGACCTAGCGGACCAACTGATTCATCTGCAATATTTTGATTGTTTTTCAGACTCTGCCATAAGGGAAGCCATATTAGGACAAATAGTTAGACCTAGGTGTGAATATCAAGCAGGACATAACAAGGTAGGATCTCTACAATATTTGGCACTGAAAGCATTAGTAAAACCCAAAAAGATAAAGCCACCTTTGCCTAGTGTTAGGAAATTAACAGAAGATAGATGGAACAAGCCCCAGAAGACCAAGGGCCACCGAGAGAACCCTACAACGAGTGGACATTAGAACTGTTAGAAGAACTTAAACAGGAAGCTGTTAGACATTTTCCCAGAATCTGGCTTCAGGGTTTAGGACAACATATCTATAACACTTATGGGGATACTTGGGAAGGAGTTGAAGCCATAATAAGAATACTACAACAATTACTGTTTATCCATTTCAGAATTGGGTGCCAACATAGCAGAATAGGCATTCTTCCACGGAGAAGAGTAAGGGATGGATCCGGTAGATCCTAAGCTAGAGCCCTGGAATCATCCAGGGAGTCAGCCTAAAACTGCTTGTAACAAGTGCTATTGTAAAGTGTGTTGTTGGCATTGCCAAGTTTGCTTTCTGAACAAAGGCTTAGGCATCTCCTATGGCAGGAAGAAGCGGAAGCACCGACGAGGAACTCATCCAGACAGTGCGGATCATCAAGATCCTATACCAAAGCAGTAAGTAGTTATAATTAGTATATGTAATGCAATCATTAGAAATAGCTGCAATAGCAGGACTAATAGTAGCAAGCATAGCAGCCATAATTGTGTGGAGCATAGTATTTATAGAGTATAGGAAAATAAGAAAACAGAAAAGAATAGATAGGTTACTTGATAGAATAAGAGAAAGAGCAGAAGACAGTGGAAATGAGAGTGAAGGGGATACAGAGGAGTTGGCAACACTTGTGGACATGGTGGACTTTGAGCCTTGGGTTGGTGATAATTTGTAGTGCCTCAGGGAACTTGTGGGCCACAGTATATTATGGGGTACCTGTGTGGGAAGACGCAGATACCCCTCTATTTTGTGCATCTGATGCTAAAGCATATAGTAATGAAAAGCATAATGTATGGGCCACACATGCCTGTGTACCCACAGACCCCAATCCAAAAGAAATAAGTCTGAAAAATGTGACAGAAAACTTTAACATGTGGAAAAATAGCATGGTAGAACAAATGCATGAGGATATAATCAGTTTATGGGATGAAAGCCTAAAGCCATGTGTAAAGCTAACCCCTCTCTGTGTTACTTTAAACTGTACTGATGTACCCAACAATAGTACTAAGAACAGCAATAGTACTGTACCCAACAATAGTACTGAGAACAGCAATAGTACTCAGAACAACTCCACAGTATATAATAAACTAGAAATGACAAACTGCACTTTCAATATAACCACAGAAGTAAGAGATAAGCAGAAGCAAGAATATGCGCTTTTTTATAAACTTGATGTGGTACCACTTGATGATAACAGTAGTAGTAATTATAGGCTAATAAATTGTAATGTCTCAGCCCTTAAACAGGCTTGTCCAAAGGTGTCTTTTGACCCAATTCCCATACATTATTGTGCTCCAGCTGGTTTTGCGATTTTAAAGTGTAGGGATAAGAATTTCAATGGAACAGGAACATGTAAAAATGTCAGTACAGTACAATGCACACATGGAATTAAGCCAGTGGTATCAACTCAATTACTACTGAATGGCAGTTTAGCAGAAGACGAAATAGTAATTAGAACTGAAAACATCTCAAACAATGCCAAAATCATAATAGTGCAGTTTAATGAAACTATAGGAATTAATTGTACCAGACCCTTTAACAATACAAGAAGAAGTATAAGAATCGGACCTGGACAGGCGTTCTATGCAACAGGTGAAGTCATAGGAGATATAAGACAAGCACATTGTAATGTAAGTAGAATACAATGGATTGGGATGGTACAAAAGGTAACAGCACAGCTAAAGAAAATAAATGGCTTTGAGAACAAAACTATAATATTTAACTCATCCGCAGGAGGGGACCTAGAAATTACAACACATAGTTTTAATTGTAGAGGGGAATTTTTCTATTGTAATACATCAGGATTGTTTAACAATAGCTTGTTTACCAACAATAGTAGTAATACCAACAATAGCAGTAATGACACTATCACGCTCCCATGTAGGATAAAGCAAATTGTGAGAATGTGGCAGAAGGTGGGACAAGCAATGTATGCCCCTCCCATCGCAGGAGATATTACATGTAGATCAAATATTACAGGGCTACTATTAACAAGAGATGGTGGGAGAGATGGTGGGAATACTAGCACAAATGAAACCTTCAGACCTGGAGGAGGAGATATGAGGGACAATTGGAGAAGTGAATTATATAAGTATAAAATAGTAAAAATTAAACCACTAGGAATAGCACCCACCAGGGCAAGGAGAAGAGTGGTGGAGAGAGAAAAAAGGGCAGTTGGACTGGGAGCTGTCTTCCTTGGGTTCTTAGGAACAGCAGGAAGCACTATGGGCGCAGCGTCAATAACGCTGACGGTACAGGCCAGACAATTATTGTCTGGCATAGTGCAACAGCAAAGCAATTTGCTGAGGGCTATAGAGGCACAGCAACATCTGTTGCAACTCACAGTCTGGGGCATTAAGCAGCTCCAGGCAAGAGTCCTGGCTGTGGAAAGATACCTACAGGATCAACAGCTCCTAGGGATTTGGGGCTGCTCTGGAAAACTCATCTGCACCACTAATGTGCCCTGGAACACTAGTTGGAGTAATAAATCTTATGAGGAGATTTGGGATAACATGACCTGGATACAATGGGACAGGGAAGTCAGCAATTACACACAACAAATATACGAACTAATTGAACAATCGCAAATCCAGCAGGAAAAGAATGAACAAGACTTATTGGCATTGGACAAGTGGGCAAGCTTGTGGAATTGGTTTAGCATAACAAAATGGCTATGGTATATAAAAATATTTATAATGATAGTAGGAGGGTTAATAGGTTTAAAAATAGTTTTTGCTGTGCTTTCTATAGTAAAAAGAGTTAGGGAGGGATACTCACCTTTGTCATTCCAGACCCTTACCCACCACCAGAGGGAACCCGACAGGCCCGAAAGAATCGAAGAAGGAGGTGGAGAGCAAGGCAGAGGCAGATCCATTCAATTAGTAGGCGGATTCTTGACACTTGCCTGGGACGATCTGAGGAGCCTGTGCCTTTTCAGCTACCACCTCTTGAGAGACTTCATCTTAATTGCAGCGAGGACATTGGAACTTCTGGGACGCAGCAGTCTCCAGGGACTGAGACTGGGGTGGGAGGGCCTCAAATATCTGTGGAATCTCCTGGTGTATTGGAGTCAGGAACTAAAGAATAGTGCTATTAATTTGCTTGATACAATAGCAATAGCAGTAGCTAACTGGACAGATAGGGTTATAGAAGCAGCACAAAGAGCTTGTAGAGCTATTTGTWACATACCTAGAAGGATAAGACAAGGCCTGGAAAGAGCTTTGCTATAAAATGGGAGGCAAGTGGTCAAAATTGGGTGGATGGCCCGCAATAAGGGAAAGAATGAGACAAACCCCTCCAACAGAAACCCCTCCAGCAGCAGAAGGAGTAGGAGCAGTATCTCAAGATTTAGCTAGGCATGGAGCAGTCACAAGCAGCAATACAGCAAGCACTAACTCAGCTTGTGCCTGGCTAGAAGCGCAACAGGAGGATTCAGAAGTAGGCTTTCCAGTCAGACCACAAGTACCTTTGAGACCAATGACTTATAAGGGTGCTTTTGATCTCAGCTTCTTTTTAAAAGAAAAGGGGGGACTGGATGGGCTAATTTACTCCAAGCAAAGACAAGATATCCTTGACCTGTGGGTCTACAATACACAAGGATATTTCCCTGACTGGCAGAACTACACTCCAGGGCCAGGGACTAGATTCCCACTGACCTTTGGGTGGTGCTTCAAACTAGTACCAATGGATCCAGCAGATATAGAGGAAGCCAATAAAGGAGAGAACAACAGTTTATTGCACCCCATCTGCCAGCATGGAATGGAAGACACTGAGAAGGAAGTGCTGATATGGAGATTTGACAGCAGCCTAGCACGGAGACACCTAGCCCGAGAGCTGCATCCGGAGTACTACAAAAACTGCTGACACAGAAGTTGCTGACAAGGGGACTTTCCGTCTGGGACTTTCCGGGGAGGCGCGGCCTGGGAGGGACTGGGGAGTGGCTAACCCTCAGAAGCTGCATATAAGCAGCCGCTTTTCGCCTGTGCTGGGTCTCTCTTGTTAGACCAGATTTGAGCCTGGGAGCTCTCTGGCTAGCAGGAGAACCCACTGCT
>A1.KE.x.ML752.EU110085_G.BE.96.DRCBL.AF084936
TCCGGAGAGGTTCTCTCGACGCAGGACTCGGCTTGCTGAGGTGCACACAGCAAGAGGCGAGAGCGGCGACTGGTGAGTACGCCATTTTTGACTAGCGGAGGCTAGAAGGAGAGAGATGGGTGCGAGAGCGTCAGTATTAAGTGGGGGAAAATTAGATGCATGGGAGAAAATTCGGTTAAGGCCAGGGGGAAAGAAAAAATATAGAATGAAACATCTAGTATGGGCAAGCAGGGAGCTGGAAAGATTTGCACTTAACCCTGGCCTTTTAGAAACAACAGAAGGGTGTCAACAAATACTGGAACAGTTACAGCCAGCTCTCCAGACAGGAACAGAAGAACTTAGATCATTATATAATACAGTAGCAACCCTCTATTGTGTACATCAACGGATAGATGTAAAAGACACCAAGGAAGCTCTAGATAAAATAGAGGAAATACGAAATAAGAGCAAGCAAAAGACACAACAGGCAGCAGCAGCTGACACAGGAAACAGCAGCAAGGTCAGCCAAAATTATCCTATAGTGCAAAATGCACAAGGGCAAATGACACACCAAAACTTGTCACCTAGGACTTTAAATGCATGGGTAAAAGTAATAGAAGAAAAAGCTTTCAGCCCAGAGGTAATACCCATGTTCTCAGCATTATCAGAAGGAGCCACCCCACAAGATTTAAATGTAATGCTGAACATAGTGGGGGGACACCAGGCAGCTATGCAAATGTTAAAAGACACCATCAATGAAGAAGCTGCAGAATGGGACAGGTTACATCCAGTACATGCAGGGCCTATTCCACCAGGCCAGATGAGAGAGCCAAGGGGAAGTGATATAGCAGGAACTACTAGTACCCCTCAAGAACAATTACAATGGATGACAAGCAACCCACCTATCCCAGTGGGAGACATCTATAAAAGATGGATAATCCTGGGATTAAATAAAATAGTAAGAATGTATAGCCCTGTTAGCATTTTGGATATAAAACAAGGGCCAAAAGAACCCTTCAGAGACTATGTAGATAGGTTCTTTAAAGCTCTCAGAGCTGAGCAAGCTACACAGGAGGTAAAAGGTTGGATGACAGAAACATTACTGGTCCAAAATGCAAATCCAGATTGTAAGTCCATTTTAAAAGCATTAGGAACAGGGGCTTCATTAGAAGAAATGATGACAGCATGCCAGGGAGTGGGAGGACCCGGCCATAAAGCAAGGGTTTTAGCTGAGGCAATGAGTCAAGTACAACAGACAAACGTAATGATGCAGAGAGGCAATTTTAGGGGCCAAAAAAGGATTAAATGTTTTAATTGTGGCAAAGAAGGACACCTAGCCAGAAATTGCAAGGCCCCTAGGAAAAAGGGCTGTTGGAAATGTGGGAAGGAGGGACACCAAATGAAAGACTGCACTGAAAGACAGGCTAATTTTTTAGGGAGAATTTGGCCTTCCCACAAGGGGAGGCCAGGAAATTTCCCTCAGAGCAGACCAGAGCCAACAGCCCCACCAGCAGAGATCTTTGGGATGGGGGAAGAGATAGCCTCCCCTCCGAAGCAGGAGCAGAGAGACAGAGAACAACCACCTTTAGTTTCCCTCAAATCACTCTTTGGCAACGACCCCTTGTCACAGTAAAAATAGGGGGACAGCTAAAAGAAGCTCTATTAGATACAGGAGCAGATGATACAGTATTAGAAGACATAAATTTGCCAGGAAAATGGAGACCAAAAATGATAGGGGGAATTGGAGGTTTCATCAAAGTAAAACAGTATGATCAGATCTCTATAGAAATTTGTGGAAAAAAGGCTATAGGTACAGTATTAGTAGGACCTACCCCTGTCAACATAATTGGAAGAAATATGTTGACCCAGATTGGTTGTACTTTAAATTTCCCAATTAGTCCTATTGAAACTGTACCAGTAAAATTAAAGCCAGGAATGGATGGCCCAAAGGTTAAACAATGGCCATTGACAGAAGAAAAAATAAAAGCATTAACAGAAATTTGTACAGAAATGGAAAAGGAAGGAAAAATCTCAAAAATTGGGCCTGAAAATCCATACAATACTCCAATATTTGCTATAAAGAAAAAAGACAGCACTAAATGGAGGAAATTAGTAGATTTCAGAGAGCTCAATAAAAGAACTCAAGACTTTTGGGAAGTTCAATTAGGAATACCGCATCCAGCGGGTCTGAAAAAGAAAAAATCAATAACAGTACTAGATGTGGGGGACGCATATTTTTCAGTCCCTTTAGATGAAGGCTTTAGAAAGTACACTGCGTTCACCATACCTAGTACAAACAATGAAACACCAGGAATTAGGTATCAGTACAATGTGCTTCCACAGGGATGGAAAGGATCACCGGCAATATTCCAGAGTAGCATGACAAAAATCTTAGAGCCCTTTAGATCAAAAAATCCAGAAATAATTATCTATCAATACATGGATGACTTGTATGTAGGATCTGATTTAGAAATAGGGCAGCATAGAACAAAAATAGAAGAGTTGAGGGCTCATCTATTGAGCTGGGGATTTACTACCCCAGACAAAAAACATCAGAAAGAACCACCATTTCTTTGGATGGGATATGAACTCCACCCTGACAAGTGGACAGTCCAGCCTATCATGCTGCCAGAAAAAGAAAGCTGGACTGTCAATGATATACAGAAGTTAGTGGGAAAACTAAATTGGGCAAGTCAAATTTATGCAGGGATTAAAGTAAAGCAACTGTGTAAACTCCTCAGGGGAGCCAAAGCATTAACAGATATAGTACCACTGACTGAGGAGGCAGAATTAGAATTGGCAGAGAACAGGGAGATTCTAAAAGACCCTGTGCATGGAGTATACTATGACCCATCAAAAGATTTAATAGCAGAAATACAGAAACAAGGGCAAGACCAATGGACATACCAAATCTATCAAGAGCCATTTAAAAATCTAAAAACAGGAAAATATGCAAGAAGAAGGTCAGCTCACACTAATGATGTAAAACAATTAGCAGAAGTGGTGCAAAAGGTGGTCACGGAAAGCATAGTAATATGGGGAAAGACTCCTAAATTTAAACTACCCATACAAAAAGAAACATGGGAAACATGGTGGATGGACTATTGGCAGGCTACCTGGATTCCTGAATGGGAGTTTGTCAATACCCCTCCTCTAGTAAAATTATGGTACCAGTTAGAGAAAGACCCCATAGCAGGAGCAGAGACTTTCTATGTAGATGGGGCAGCCAATAGGGAAACTAAGCTAGGGAAAGCAGGGTATGTCACTGACAGAGGAAGGCAAAAGGTTATTTCTCTGACTGAGACAACAAATCAAAAGACTGAACTACATGCAATCCATCTAGCCTTGCAGGATTCAGGATCAGAGGTAAACATAGTAACAGACTCACAGTATGCATTAGGAATCATTCAGGCACAACCAGACAAGAGTGAGTCAGAGTTAGTCAATCAAATAATAGAGAAGCTAATAGGAAAGGACAAAGTCTACCTGTCATGGGTTCCCGCACACAAGGGAATTGGAGGGAATGAACAAGTAGATAAATTAGTCAGTTCTGGAATCAGGAAGGTGCTGTTTTTAGATGGGATAGATAAAGCTCAAGAGGAACATGAAAGATATCACAGCAATTGGAGAACAATGGCTAGTGATTTTAATCTGCCACCTATAGTAGCAAAGGAAATAGTAGCCAGCTGTGATAAATGTCAACTAAAAGGGGAAGCCATGCATGGACAAGTAGACTGTAGTCCAGGGATGTGGCAATTAGATTGCACACATCTAGAAGGAAAAGTAATTTTAGTAGCAGTCCATGTAGCCAGTGGCTATATAGAAGCAGAAGTTATCCCAGCAGAAACAGGACAGGAGGCAGCATATTTTATGCTAAAATTAGCAGGAAGATGGCCAGTAAAAGTAGTACACACAGACAATGGCAGCAATTTCACCAGCGCTGCATTTAAAGCAGCCTGTTGGTGGGCAAATATCCAACAGGAATTTGGAATTCCCTACAATCCCCAAAGTCAAGGAGTAGTGGAATCTATGAATAAGGAATTAAAGAAAATCATAGGACAGGTAAGGGAGCAAGCTGAACATCTTAAAACAGCAGTACAAATGGCAGTATTCATTCACAATTTTAAAAGAAAAGGGGGGATTGGGGGGTACAGTGCAGGGGAAAGAATAATAGACATAATAGCAACAGACATACAAACTAAAGAATTACAAAAACATATTACACAAATTCAAAATTTTCGGGTTTATTACAGGGACAGCAGAGATCCAATTTGGAAAGGACCAGCAAAACTACTCTGGAAAGGTGAAGGGGCAGTAGTAATACAGGACAAGAGTGATATAAAGGTAGTACCAAGAAGAAAAGCAAAGATCATTAGGGACTATGGAAAACAGATGGCAGGTGATGATTGTGTGGCAGGTAGACAGGATGAGGATTAGGCAATGGCACAGTTTAGTAAAATATCATATGTATGTCTCCAAGAAAGCTAAAGATTGGTTGTATAGACATCACTTTGAAAGCAGGCATCCAAAAGTAAGTTCAGAAGTACACATCCCACTAGGGGACGCTAGATTAGTAGTAAGAACATATTGGGGTCTGCATACAGGGGAAAAAGCTTGGCACTTGGGTAATGGGGTCTCCATAGAATGGAGGCTAAAAAGATATAGCACACAAATAGATCCTGACCTGGCAGACCAACTAATTCATCTGCATTATTTTAACTGTTTTTCAGACTCTGCCATAAGGAAAGCCATATTAGGACAAGTAGTTAGCCCTAGTTGTGAATATCAAGCAGGACATAACAAGGTAGGATCTCTACAATATTTGGCACTGAAAGCATTAGTAACACCAAAAAAGATAAGGCCACCTTTGCCTAGTGTTGGGAAATTAGCAGAGGACAGATGGAACAAGCCCCAGAAGACCAGGGGCCACAGAGGGAGCCATACAATGAATGGACATTAGAACTGTTAGAAGAGCTTAAGAATGAGGCTGTTAGACATTTTCCTAGGACATGGCTCCATGGATTAGGACAACATATCTATAATACCTATGGGGACACTTGGGAAGGAGTTGAAGCCATAATAAGAACTTTGCAACAATTACTGTTTGTCCATTTCAGAATTGGGTGCCAGCATAGTAGAATAGGCATTATGCGAAGAAGAAGAGTCAGGGATGGATCCGGTAGATCCTAACCTAGAGCCCTGGAATCATCCGGGAAGTCAGCCTGCAACTGCTTGTAGCAAGTGTTACTGCAAAGTGTGTTGCTATCATTGTCCAGTTTGCTTTCTGAACAAAGGCTTAGGCATCTCCTATGGCAGGAAGAAGCGGAAACAGCGACGAGGAACTCCTCAATGCAATAAGGATCATCAAGATTCTGTACCAAAGCAGTAAGTAGTGATAGTTAATATATGTAATGTTACCTTTGGAAATCTGGGCAATAGTAGGACTGGTAGTGGCGCTAATCCTAGCAATAGTTGTGTGGACTATAGTAGGTATAGAATATAAGAAAGTGCTAAAGCAAAGAAAAATAGACAGGTTAATTGAGAGAATAAGAGAAAGAGCAGAAGACAGTGGCAATGAGAGTGAAGGGGATACAGAGGAACTCTCAGCACTTATTGAGATGGGGAATTATGATCCTGGGAATGATAATAATCTGTAGTGCTGCAGAAAACTTGTGGGTTACTGTCTACTATGGGGTGCCTGTGTGGAAGGACGCAGAGACCACCCTATTTTGTGCATCAGATGCTAAAGCATATAAGGCAGAAGCGCATAACATCTGGGCTACACATGCCTGTGTACCTACAGACCCCAACCCACAAGAAATAAATTTAAAAAATGTGACAGAAGAGTTTAACATGTGGAAAAATAATATGGTAGAACAGATGCATACAGATATAATCAGTCTATGGGACCAAGGAATAAAACCATGTGTAAAGTTAACCCCTCTCTGCGTTACTTTAGATTGTTATAATGTCAATACCACTGCCAATGTCTCTAATGTCGCTGAGGACATGAAAGGAGAAATAAAAAACTGCTCTTTCAATGTGACCACAGTACTAAGGGATAAGCAACAGAAAATACATTCACTTTTTTATAGACATGATGTAGTACAAATTGAGGGTAATAATAGTCAGCATAATAATAGTCAGAATAGTCAGTATAGATTAATAAATTGTAACACCTCAGCCATTACACAGGCTTGTCCAAAGGTAACCTTTGAGCCAATTCCCATACATTATTGTGCCCCAGCTGGTTTTGCGATTCTAGAGTGTAAGGATAAAGATTTCAATGGAACAGGGCTATGCAAGAATGTCAGCACAGTACAATGCACACATGGAATCAAGCCAGTAGTATCAACTCAACTGCTGTTAAATGGCAGTCTAGCAGAAGAAGAGGTAACAATTAGATCTGAAAATATCACAGAAAATAGCAAAAATATTATAGTACAATTTACCAGCCCTGTAAAAATTAATTGTACCAGACCTAACAACAATACAAGAAAAAGTGTACATATAGGACCAGGACAAGCATTCCATGCAACAGGTGACATAATAGGGGATATAAGAAAAGCACATTGTAACATTAGTAGAACAGAATGGAATGAAACTTTGTACAAGGTAGCCAAACAATTAGAAACATACTTTAAGAACAAAACAATAATCTTTACTAACCACTCAGGAGGGGATCTAGAAGTTACAACACATAGTTTTAATTGTGGAGGAGAGTTTTTCTATTGTTACACATCAGACCTGTTTAATAGCACTTTGTATAGCAATGGCAGCTGGCAGATGGCAAATAGCACGGGGTCTGACAATATAACTCTAACTCTTACATGCAGAATAAAGCAAATTATAAATATGTGGCAGAGAACAGGACAAGCAATATATGCCCCTCCCATACAAGGAGTAATAAGGTGTGACTCAAATATTACAGGACTAATATTAACAAGAGATGGTGGGGAAGATGGTAAGAATGATACTAATCTAACTGAAACCTTCAGACCTGGAGGAGGAGATATGAGGGACAATTGGAGAAGTGAATTATATAAGTATAAAGTGGTAAAAATTGAACCACTAGGAGTAGCACCAACCAAGGCAAAGAGAAGAGTGGTGGAGAGGGAAAAAAGAGCAGTTGGACTAGGAGCTGTCCTCATTGGGTTCTTAGGAACAGCAGGAAGCACTATGGGCGCGGCGTCAATAACGCTGACGGTACAGGTCAGACAATTATTGTCTGGCATAGTGCAACAGCAAAGCAATTTGCTGAGGGCTATAGAGGCTCAACAGCATCTGTTGAAACTCACGGTCTGGGGCATTAAACAGCTCCAGGCAAGAGTCCTGGCTGTGGAAAGATACCTAAGGGATCAACAGCTCCTAGGAATTTGGGGCTGCTCTGGAAAACTCATCTGCACCACTAATGTGCCTTGGAACTCTAGTTGGAGTAATAAATCCCTGACTGAGATATGGGACAATATGACCTGGCTACAATGGGATAAAGAAATTAGCAAGTACACACAGCAAATATATGATCTAATTGAAAAATCGCAGAACCAGCAGGAAAAAAATGAACAAGACTTATTAGCATTGGACAAGTGGGCAAGTCTGTGGAATTGGTTTGACATATCAAAATGGCTGTGGTATATAAAGATATTTATAATGATAGTAGGAGGCTTAATAGGATTAAGAATAGTTTTTGCAGTGCTTTCTGTAATAAATAGAGTTAGGCAGGGCTACTCACCTTTGTCATTTCAGACCCATACCCCAAACCCAAGGGATCTCGACAGGCCCGGAAGAATCGAAGAAGAAGGTGGAGAGCAAGACAGAACCAGATCGATTCGATTAGTGAGCGGATTCTTAGCACTTGCCTGGGACGATCTACGGAGCCTGTGCCTTTGGAGCTACCACCGATTGAGAGACTTCATCTTGATTGCCGCGAGGACTGTGGAACTTCTGGGACACAGCAGTCTCAAGGGGTTGAGACGGGGTTGGGAAAGCCTCAAGTATCTGGGGAATCTCCTGGTATATTGGGTTCGGGAACTAAAAATTAGTGCTATTAGTTTGCTTGATACCATAGCAATAGCAGTAGCTGGCTGGACCGATAGGATTATAGAACTAGGACAAGGACTTTGTAGAGCTATTTTACACATACCTAGAAGAATCAGACAGGGCTTAGAAAGGGCTTTGTTATAGCATGGGGGGCAAGTGGTCAAAAAGTAGCATAGTGGGATGGCCTGAGGTTAGGGAAAGAATAAGACAAACTCGGCCTGAGAATAGGGAAAGAGCAAGACAAACTTCAGCAGCAAAAGGAGTAGGAGCAGTATCTCAAGATTTAGATAAACATGGAGCAGTCACAAGCAGCAATATAAATCATCCTAGTTGTGCCTGGCTGGAAGCGCAAGAGGAAGAGGAGGTAGGCTTTCCAGTCAGACCACAGGTACCTTTAAGACCTATGACTTATAAGGCTGCGTTTGATCTCAGCTTCTTTTTAAAAGAAAAGGGGGGACTGGATGGGCTAGTTTACTCCAAGAAAAGACAAGAGATCCTTGACCTATGGGTCTATCATACACAAGGATTCTTCCCAGATTGGCAGAACTACACACCAGGGCCAGGGACTAGAGTCCCACTGACCTTTGGGTGGTGCTTCAAACTGGTACCAATGGAGCCATCAGAGGTAGAGGAAGCCAATAAGGGAGAGAACAACAGCCTGTTACACCCCATCTGCCAGCATGGAATGGAGGACGAAGATGGAGAAGTGCTGGTATGGAGATTTGACAGTAGCCTGGCACGGAGACACTTAGCCCGAGAGCTGCATCCGGAGTACTACAAAGACTGCTGACACAGAAGTTGCTGACAAGGGGACTTTAAGTTGCTGACAAAGGACTTTCCGCCCGGGACTTTCCAGGGGAGGCGCGGCCTGGGAGGGGCTGGGGAGTGGCTAACCCTCAGAAGCTGCATATAAGCAGCCGCTTCTCGCCTGTACTGGGTCTCTCTTGTTAGACCAGATTTGAGCCTGGGAGCTCTCTGGCTAGCAGGGGAACCACTGCTTAGAGCCTCAATAAAGCTTGCCTTGAGTGCTTCAAGTAGTGTGTGCCCGTCTGTTGTGTGACTCTGGTAACTAGAGATCCCTCAGACCACTCTAGATAGTGTAAAAATCTCTAGCAGT
>A1.SE.95.UGSE8131.AF107771_H.CF.90.056.AF005496
AAATCTCTAGCAGTGGCGCCCGAACAGGGACCCGAAAAGTGAAAGTAATAGGGACTCGAAAGCGAAAGTTCCAGAGAATTCTCTCGACGCAGGACTCGGCTTGCTGAAGGTGCACACAGCAAGAGGCGAGAGCGGCGACTGGTGAGTACGCCATTTTTTGACTAGCGGAGGCTAGAAGGAGAGAGATGGGTGCGAGAGCGTCAGTATTAAGCGGGGGAAAATTAGATGCTTGGGAGAAAATTCGGTTGAGGCCAGGGGGAAACAAAAAATATAGACTAAAACATCTAGTATGGGCAAGCAGGGAGCTGGAAAAATTTGCACTTAACCCTGGCCTTTTAGAAACAGCAGAAGGATGTCAACAGATAATAGAACAATTACAATCAGCTCCCAAAACAGGAACAGAAGAACTTAGATCATTATATAATACAGTAGCAACCCTCTATTGTGTACATCAAAGGATAGATGTAAAAGACACCAAGGAAGCTCTAGATAAAATAGAGGAGATACAAAATAAAAGCAAGCAAAAGAAAGAGCAGGCAGCAGCTGACACAGGAAACAGCAGCAAGGTCAGCCAAAATTACCCTATAATGCAAAATGCACAAGGACAAATGGTACACCAAGTCATGTCACCTAGGACTTTGAATGCATGGGTGAAAGTAATAGAAGAAAGGGCTTTCAGCCCCGAAGTAATTCCCATGTTCTCAGCATTATCAGAAGGAGCCACCCCACATGATTTAAATATGATGCTAAACATAGTGGGGGGACACCAGGCAGCTATGGAAATGTTAAAAGATACCATCAATGAGGAAGCTGCAGAATGGGACAGGACACATCCAATACATGCAGGGCCTGTTGCACCAGGCCAGATGAGAGAACCAAGGGGAAGTGATATAGCAGGAACTACTAGTACCCTTCAAGAACAAATAGCATGGATGACATCCAACCCACCTGTCCCAGTGGGAGACATCTATAAAAGATGGATTATCCTAGGATTAAATAAAATAGTAAGAATGTATAGCCCTGTTAGCATTTTGGATATAAAACAAGGACCAAAAGAACCCTTCAGAGACTATGTAGATAGGTTCTTTAAAGCTCTCAGAGCTGAGCAAGCTACACAGGAAGTAAAAGGTTGGATGACAGATACATTACTGGTCCAAAATGCAAATCCAGATTGTAAGTCCATCTTAAGAGGATTAGGAGCAGGGGCTACATTAGAAGAAATGATGACAGCATGTCAGGGAGTGGGAGGACCCAGCCATAAAGCAAGGGTTTTGGCTGAGGCAATGAGTCAAGCACAACAAACAAACATAATGATGCAGAGAGGCAATTTTAGGGGCCAGAAAAAGATTAAGTGTTTCAACTGTGGCAAAGAAGGACACCTAGCCAGAAATTGTAGAGCCCCTAGGAAAAAGGGCTGTTGGAAATGTGGGAAGGAGGGACACCAAATGAAAGACTGTACTGAAAGACAGGCTAATTTTTTAGGGAAAATTTGGCCTTCCCACAAGGGGAGGCCGGGAAATTTTCCTCAGAGCAGACCGGAGCCATCAGCCCCACCAGCAGAGATGATGGGGGAAGAGATAGCCTCCCCTCCGAAGCAGGAGCAAAACAACCCACCTTCAGTTTCCCTCAAATCACTCTTTGGCAACGACCTATTGTCACAGTAAGAATAGGGGGACAGCTAAAAGAAGCTCTATTAGATACAGGAGCAGATGATACAGTACTAGAAGACATAAATTTGCCAGGAAAATGGAAACCAAAAATGATAGGGGGAATTGGAGGTTTTATCAAAGTAAGACAGTATGATCAGATATTAATAGAAATTTGTGGAAAAAAGGCTATAGGTACAGTATTGGTAGGACCTACACCTGTCAACATAATTGGAAGAAATATGTTGACCCAGATTGGTTGTACTTTAAATTTCCCAATTAGTCCTATTGAAACTGTACCAGTAAAATTAAAGCCAGGAATGGATGGCCCAAAGGTTAAACAATGGCCATTGACAGAAGAAAAAATAAAAGCATTAACGGAAATTTGTACAGAGATGGAAAAAGAAGGAAAAATCTCAAGAATAGGGCCTGAGAATCCATACAGCACTCCAATATTTGCCATAAAAAAGAAGGATAGTACTAAATGGAGAAAATTAGTGGATTTCAGAGAACTCAATAAAAGAACTCAAGACTTCTGGGAAGTTCAGTTAGGAATACCACACCCAGCAGGGTTAAAAAAGAAAAAATCAGTATCAGTACTGGATGTGGGGGATGCATATTTTTCAGTCCCTTTAGATAAAGAATTCAGAAAGTATACTGCATTCACCATACCTAGTATAAACAATGAGACACCAGGGATTAGATATCAGTATAATGTGCTTCCACAGGGATGGAAAGGATCACCAGCAATATTCCAGAGTAGCATGACAAAAATCTTAGCGCCCTTTAGAGAACAAAATCCTGAAATGGTTATTTACCAATACATGGATGATTTGTATGTAGGATCTGACTTAGAAATAGGGCAACATAGAGCAAAAATAGAGGAGTTAAGAGCTCATTTGTTGAAATGGGGATTTACCACACCAGACAAAAAACATCAGAAAGAACCCCCATTTCTTTGGATGGGATATGAACTCCATCCTGACAAATGGACAGTACAGACTGTAAAACTGCCAGAAAAAGACAGCTGGACTGTCAATGATATACAGAAGTTAGTGGGAAAACTAAATTGGGCAAGTCAGATTTATCCAAATATTAAAGTAAAGCAACTATGTAAACTCCTTAGGGGGGCCAAAGCATTAACAGACATAATACCACTGACAAAAGAGGCAGAATTGGAATTGGCAGAAAACAGGGAGATTCTGAGAGAACCAATACATGGAGTATATTATGATCCATCAAAAGACTTAATAGCAGAAATACGGAAGCAAGGGCAAGGCCAATGGACATATCAAATTTATCAGGAGCCATTTAAAAATCTGAAGACAGGAAAATATGCAAAAATGAGAACTGCCCACACTAATGATATAAAACAATTAACAGAAGCAGTGCAAAAGATATCTACAGAAAGCATAGTAATATGGGGAAAAATTCCTAAATTTAGACTACCTATACAAAAAGAAACATGGGAGACCTGGTGGACAGAGTATTGGCAAGCCACATGGATTCCTGAATGGGAGTTTGTTAACACCCCTCATCTAGTAAAATTATGGTATCAGTTAGAAACAGAGCCCATAGCAGGAGCAGAAACTTACTATATAGATGGGGCAGCTAATAGGGAAACTAAATTAGGAAAAGCAGGATATGTCACTGATAGAGGAAAGCAAAAAGTTGTCTCCCTAACGGAAACAACAAATCAGAAGACTGAATTACAAGCAATTTATCTAGCTTTGCAAGATTCAGGGTTAGAAGTGAACATAGTGACAGATTCACAGTATGCACTAGGAATCATTCAAGCACAACCCGATAAGAGTGAATCAGAGTTAGTTAATCAAATAATAGAGGAATTAATAAAGAAGGAAAAGGTCTACCTGTCATGGGTACCAGCACACAAAGGAATTGGAGGAAATGAACAAGTAGATAAATTAGTTAGTTCTGGAGTCAGAAAAGTGCTATTTCTAGATGGGATAGATAAAGCTCAAGAAGAACATGAAAGGTATCATAACAATTGGAGAGCAGTGGCTAGTGATTTTAATCTACCACCTATAGTAGCAAAAGAAATAGTAGCTAGCTGTGATAAATGTCAGCTAAAAGGGGAAGCCATGCATGGACAAGTAGACTGTAGCCCAGGAATATGGCAATTAGATTGCACACATTTGGAAGGACAAGTTATTCTGGTAGCAGTCCATGTAGCCAGTGGCTATATAGAAGCAGAAGTCATCCCAGCAGAAACAGGAAAGGAAACAGCATACTTCCTGTTGAAACTAGCAAGCAGATGGCCAGTAAAAGTAATACATACAGACAATGGCAGCAATTTCACGAGTGCTGCGGTTAAGGCAGCCTGTTGGTGGGCAGATATCCAACAGGAATTTGGGATTCCCTACAATCCCCAAAGTCAGGGAGTAGTAGAATCTATGAATAAAGAATTAAAGAAGATCATAGGGCAGGTAAGAGACCAAGCAGAACACCTTAAGACAGCAGTACAAATGGCAGTATTCATTCACAATTTTAAAAGAAAAGGGGGGATTGGGGGGTACAGTGCAGGGGAAAGAATAATAGACATAATAGCAACAGACATACAAACTAAAGAATTACAAAAACAAATTTCAAACATTCAAAAATTTCGGGTTTATTACAGGGACAGCAGAGACCCAATTTGGAAAGGACCAGCAAAACTCCTCTGGAAAGGTGAAGGGGCAGTAGTAATACAAGACAATAGTGAAATAAAAGTAGTACCAAGAAGAGAGGCAAAAATCATTAGGGATTATGGAAAACAGATGGCAGGTGATGATTGTGTGGCAAGTAGACAGGATGAGGATTAACACATGGAAAAGCTTAGTAAAGTACCATATGCATATTTCAAGGAAAGCTAGAGGATGGTTTTATAGACATCATTTTGAAAGCACTCATCCAAGGATAAGTTCAGAAGTACACATCCCATTAGGAGAAGCTAGGTTAGTCATAACCACATACTGGGGTCTGAATACAGGAGAAAGAGAATGGCATTTAGGCCAGGGAGTCTCCATAGAATGGAGACTGAAAAGGTATAGCACACAAGTAGAGCCTGGCCTGGCAGACCAACTAATTCATATGCATTATTTTGATTGTTTTTCAGAATCTGCCATAAGGAAAGCCATATTAGGACGTGTAGTTAGACCTAGGTGTAACTATCCAGCAGGACATAAACAGGTAGGAACTCTACAATACTTGGCATTAACAGCATTAGTGGCACCAAAAAAGATAAAGCCACCTTTGCCTAGTGTTAGAAAGCTAGTAGAGGATAGATGGAACAAGCCCCAGAAGACCAGGGGCCACAGAGGGAGCCACACAATGAATGGACACTAGAGCTTTTAGAGGAGATTAAGAATGAGGCTGTTAGGCATTTTCCTAGAGTATGGCTCCATCAATTAGGACAGCATATCTATAACACCTATGGAGATACTTGGGTAGGAGTTGAAGCTTTAATAAGAACGCTGCAACAACTACTGTTTATTCATTTCAGAATTGGGTGCCAACATAGCAGAATAGGAATTACTCGACAGAGAAGAGTAAGAAATGGACCCAGTAGATCCTAAACTAGAGCCCTGGAACCATCCAGGAAGTCAGCCTCAAACTGCTTGTAACAATTGTTATTGTAAAAAGTGCTGCTATCATTGCCAAATGTGCTTTTTAAAGAAAGGCTTAGGAATTTCCTATGGCAGGAAGAAGCGGAGCCAGCGACACAGAACTCCTGCAAGTTTGCAAGATCATCAAAATTCTATATCAAAGCAGTAAGTATTATCATAAATGTATATATTAGGATTAGGAATAGGAGCGCTAGTAGTAACATTTATCATAGCCGTAATTGTGTGGACCATAGTATATATAGAATATAAAAAATTGGTAAGGCAAAAGAAAATAGACAGGCTAATTGAAAGAATAGGAGAAAGAGCAGAAGACAGTGGCAACGAGAGTGATGGAGACACAGAGGAATTATCCAAGCTTATGGAGATGGGGCACCTTAATCTTGGGTATGTTGCTGATCTGTAGTGCTGCACAAAACTTGTGGGTTACAGTATATTATGGGGTACCTGTGTGGAAAGAGGCAAAAACCACTCTATTCTGTGCATCAGATGCTAAGGCATATGAGACAGAAAAGCATAATGTCTGGGCTACACATGCATGTGTACCCACAGACCCCAACCCACAAGAGATGGTCATGGAGAATGTAACAGAGAGCTTTAATATGTGGGAAAATAACATGGTGGAGCAGATGCATACAGACATAATCAGTTTATGGGATCAAAGCTTGAAACCATGTGTAAAATTAACCCCACTCTGTGTTACTCTAAACTGTACTAATGTCAGAAACAATACCTCTAACAGCACTAGCAGTATGGAGGCAGGAGGGGAACTAACAAATTGCTCTTTCAATGTAACTACAGTACTAAGAGATAAGCAGCAGAAAGTACATGCACTCTTTTATAGACTTGATGTAGTACCAATTGATAACAATAGTACTCAGTATAGGCTAATAAATTGTAATACCTCAGTCATTACACAGGCTTGCCCAAAGGTGTCCTTTGAACCTATTCCCATACATTATTGTGCTCCAGCTGGCTTTGCGATTCTAAAGTGTAACAATAAAACATTCAATGGAACAGGATTATGTACAAATGTCAGTACAGTACAATGTACACATGGAATTAGACCAGTGGTATCAACTCAACTGCTATTAAATGGAAGCCTAGCAGAAGAACAGATCATAATTAGAACTAAAAATATCTCAGACAATACCAAAAACATAATAGTACAGCTTAAGACACCAGTAAACATTACATGTACCAGGCCTAACAATAATACGAGAACAAGTATACATTTAGGGCCAGGACGAGCATTCTATGCAACAGGTGACATCATAGGAGATATAAGACAAGCACATTGTAATATTAGTAGAACAGACTGGAATAAGACTTTACACCAGGTAGTTACACAATTAGGAATACACTTGAACAATAGAACAATAAGCTTTAAGCCAAACTCAGGAGGGGACATGGAAGTTAGAACACATAGTTTTAATTGTAGAGGAGAATTTTTCTATTGCAATACATCAGGGCTGTTTAATAGTAGTTGGGAAATGCATACTAATTACACATCAAATGACACAAAGGGAAACGAAAACATTACACTGCCATGCAGAATAAAACAAATTGTAAACATGTGGCAGAGAGTAGGACGAGCAATGTATGCCCCTCCCATCCAAGGAAACATTATGTGTGTATCAAATATTACAGGACTAATATTGACAATTGACGAGGGTAACGCGTCTGCAGAAAATTATACCTTCAGACCTGGAGGAGGAGATATGAGGGACAATTGGAGAAGTGAATTGTATAAATATAAAGTAGTAAAAATTGAACCACTGGGAATAGCACCCACCAAGACAAGGAGAAGAGTGGTGGAGAGAGAAAAAAGAGCAGTGGGAATGGGAGCTTCTTTCCTTGGGTTCTTGGGAGCAGCAGGAAGCACTATGGGCGCGGCGTCAATAACGCTGACGGTACAGGCCAGGCAATTATTGTCTGGTATAGTGCAGCAGCAAAGCAATTTGCTGAGAGCTATACAGGCGCGACAGCATATGTTGCAGCTCACGGTCTGGGGCATTAAACAGCTCCAGGCAAGAGTCCTCGCTGTGGAAAGATACCTAAGGGATCAACAGCTCCTGGGGATTTGGGGCTGCTCTGGAAAACTCATCTGCACCACTAATGTGCCTTGGAACTCTAGTTGGAGTAATAAATCACAGAGTGAAATCTGGGACAACATGACTTGGATGGAATGGGATAAACAAATTAGCAATTACACAGAGGAAATATACAGGTTGCTTGAAGTCTCGCAAACCCAGCAGGAAAAGAATGAACAGGACTTATTAGCATTGGACAAATGGGCAAGTCTGTGGACTTGGTTTGACATATCACATTGGCTGTGGTATATAAAAATATTCATAATGATAGTAGGAGGTTTAATAGGTTTAAGAATAATTTTTGCTGTGCTTTCTATAGTAAATAGAGTTAGGCAGGGATACTCACCTTTGTCTTTTCAGACCCTTGTCCCGAACCCACGGGGACCCGACAGGCCCGAAGGAACAGAAGAAGGAGGTGGCGAGCAAGACAGAGACAGATCCGTGAGATTAGTGAACGGATTCTTACCAGTTGTCTGGGACGACCTCCGGAGCCTGTCACTCTTCAGCTACCGCCTCTTGAGAGACTTACTCTTAATTGTAGTGAGGACTGTGGAACTTCTGGGGAGAAGGGGGAGGGAAGCCCTCAAATATCTCTGGAATCTTCTACAATACTGGGGACAGGAACTAAAGAATAGTGCTATTGATTTGCTTAACACCACAGCAATAGCAGTAGCTGAGGGAACAGATGGGATTATAGTAATAGTGCAAAGAGCTTGGAGAGCTATTCTCCACATACCTAGAAGAATAAGACAGGGCTTTGAAAGAAGCTTGCTATAATAATGGGAGGCAAATGGTCAAAAAGTAGGATGGGTGGGTGGTCTACTATAAGGGAAAGAATGAGGCGAGCTGAACCAGTAGCAGAAGGGGTAGGAGCAGTGTCTCGAGATTTGGATAGACGCGGGGCAGTCACAATTAATAATACAGCATCTACTAATCGTGATGCCGCCTGGCTGGAAGCACAAGAGGACGGGGAGGAAGTAGGCTTTCCAGTCAGGCCTCAGGTACCTTTAAGACCAATGACCTATAAGGGAGCTTTTGATCTCAGCCATTTTTTAAAAGAAAAGGGGGGACTGGATGGGTTAATTTACTCCAAGCAAAGACAGGACATCCTTGATTTATGGGTCTATAACACACAAGGCTACTTCCCTGACTGGCAGAACTACACACCAGGGCCAGGGGAGAGATTTCCCCTGACCTTTGGGTGGTGCTTCAAGCTAGTACCAGTAAATCCACAGGAGGTAGAACAGGCCAATGAAGGAGAGAACAACAGCTTGCTACACCCCATGAGCCTGCATGGAATGGAGGATGACGGGAGAGAAGTGCTGATGTGGAAATTTGACAGTCGACTAGCATTGACACACTTGGCCCGAGTAAAGCATCCGGAGTACAAAGACTGCTGACACAGAAGATCTGAAAGGGACTTTCCGCTGGGACTTTCCGGGGAGGCGTGATCTGGGCGGGGATGGGGAGTGGCCAACCCTCAGATGCTGCATATAAGCAGCTGCTTTTCGCTTGTACTGGGTCTCTTTGGTTAGACCAGATCTGAGCCTGGGAGCTCTCTGGCTAGCTAAGGAACCCACTGCTTAAGCCTCAATAAAGCTTGCCTTGAGTGCTTT
>A1.UA.01.01UAPol293.DQ823359_H.BE.93.VI997.AF190128
GCGAGAGCGTCAGTATTAAGCGGGGGAAAATTAGATGCATGGGAAAGAATTCGGTTAAGGCCAGGGGGAAAGAAAAAATATAGAATAAAACACCTAGTATGGGCAAGCAGGGAGCTGGAAAGATTCGCACTTAACCCTAGCCTTTTAGAAACATCAGAAGGATGTCAACAAATACTGGAGCAATTACAACCAGCTCTCAAGACAGGATCAGAAGAACTTAAATCATTATATAATACAGTAGCAACCCTCTATTGTGTACATCAACGGATAGAGGTAAAAGACACCAAGGAAGCTTTAGATAAAATAGAGGAAATACAAAATAAGAGCAAGCAAAAGACCCAACAGGCAGCAACTGGCACAGGAAGCAGCAGCAAGGTCAGTCAAAATTACCCCATAGTGCAAAATGCACAAGGGCAAATGACACACCAGCCCATATCACCTAGGACTTTGAATGCATGGGTGAAAGTAATAGAAGAAAAGGCTTTCAGCCCAGAAGTAATACCCATGTTTTCAGCATTGTCAGAAGGAGCCACCCCACAAGATTTAAACATGATGCTGAACATAGTGGGGGGACACCAGGCAGCTATGCAAATGTTGAAAGATACCATCAATGAGGAAGCTGCTGAATGGGATAGGTTACATCCAGCACAGGCAGGGCCTTTTCCACCGGGGCAGATGAGAGAACCAAGGGGAAGTGACATAGCAGGAACTACTAGTACCCTTCAAGAACAAATAGGATGGATGACAAGCAACCCACCTATCCCAGTGGGAGACATCTATAAAAGATGGATAATCCTAGGATTAAATAAGATAGTAAGAATGTATAGCCCTGTTAGCATTTTAGACATAAGACAAGGGCCAAAAGAACCCTTCAGAGACTATGTAGATAGGTTCTTTAAAACTCTTAGAGCTGAGCAAGCTACACAGGAGGTCAAGAACTGGATGACAGAAACCCTGCTAGTCCAAAATGCAAACCCAGATTGTAAAACCATTTTAAGAGCATTAGGACCGGGGGCTACATTAGAAGAAATGATGACAGCATGCCAGGGAGTGGGAGGACCCGGCCATAAAGCAAGGGTTTTGGCCGAGGCAATGAGTCAAGCACAAAATGCAAACATAATGATGCAGAAAAGTAATTTTAGGGGCCCAAAAAGAATTAAGTGTTTCAACTGTGGCAAAGAAGGACACCTAGCCAGAAATTGCAGGGCCCCTAGGAAAAAGGGCTGTTGGAAATGTGGAAAGGAAGGCCATCAAATGAAAGACTGCACTGAGAGACAGGCTAATTTTTTAGGGAAAATTTGGCCTTCCAGCAAAGGGAGGCCAGGAAATTTTCCCCAGAGCAGACCAGAGCCATCAGCCCCACCAGCAGAGAACTTTGGGATGGGGGAAGAGATAGCCCCCTCCCTGAAACAGGAACAGAAAGACAGGGAACAGCATCCTCCTTCAATTTCCCTCAAATCACTCTTTGGCAACGACCCCTTGTCACAATAAGAATAGGAGGACAGCTAAAAGAAGCTCTATTAGATACAGGAGCAGATGATACAGTACTAGAAGACATAAATTTGCCAGGAAAATGGAAACCAAAAATGATAGGGGGAATTGGAGGTTTTATCAAGGTAAGACAGTATGATCAGATACTTATAGAAATTTGTGGAAAAAAGGCTATAGGTACGGTATTAGTAGGGCCTACCCCTGTCAACATAATTGGAAGAAATATGTTGACTCAACTTGGTTGTACTTTAAATTTTCCAATAAGTCCTATTGAAACTGTACCAGTAACATTAAAGCCAGGAATGGATGGCCCAAAGGTTAAACAATGGCCATTAACAGAAGAGAAAATAAAAGCATTAACAGACATTTGTAAGGAGATGGAAAAGGAAGGAAAAATTTCAAAAATTGGGCCTGAAAATCCATACAATACTCCAGTATTTGCTATAAAGAAAAAGGACAGCACTAAGTGGAGGAAATTAGTAGATTTCAGGGAGCTCAATAAAAGAACTCAGGACTTTTGGGAAGTTCAATTAGGAATACCTCATCCAGCGGGTTTAAAAAAGAAAAAATCAGTAACAGTACTAGATGTGGGRGATGCATATTTTTCAGTTCCTTTAGATGAAAGCTTCAGAAAGTATACTGCATTCACTATACCTAGTATAAACAATGAGACACCAGGGATTAGATATCAGTATAATGTGCTTCCACAGGGATGGAAAGGATCACCAGCAATATTTCAGAGTAGCATGACAAAAATCTTAGAGCCCTTTAGAAAACAAAATCCTGAAATAATTATTTACCAATATATGGATGATTTGTATGTAGGATCTGACTTAGAAATAGGGCAACATAGAGCGAAAATAGAGGAGTTAAGAGCTCATTTGTTGAGGTGGGGATTTACCACACCAGACAAAAAGCATCAGAAAGAACCCCCATTTCTTTGGATGGGATATGAACTCCATCCTGACAAATGGACAGTGCAGCCTGTAAAACTGCCAGAAAAAGACAGCTGGACTGTCAATGATATACAGAAGTTAGTGGGAAAACTAAACTGGGCAAGTCAGATTTATCCAGGGATTAAAGTAAGGCAACTATGTAAACTCCTTAGGGGGGCCAAAGCACTAACAGACGTAGTACCACTGACAAAAGAGGCAGAATTGGAATTGGCAGAAAACAGGGAGATTCTAAGAGAACCAGTACATGGAGTATATTATGATCCATCAAAAGACTTAATAGCAGAAATACAGAAGCAAGGGCCAGACCAATGGACATATCAAATTTATCAAGAGCCATTCAAAAATCTAAAGACAGGAAAATATGCAAAAATGAGAAATGCCCACACTAGTGATGTAAAACAATTAACAGAAGCAGTGCAAAAAATAGCTACAGAAAGCATAGTAATATGGGGAAAAATTCCTAAATTTAAATTACCTATACAAAAAGAAACATGGGAGACATGGTGGACAGAGCATTGGCAAGCCACATGGATTCCTGAGTGAGAGTTTGTTAACACCCCTCATCTAGTAAAATTATGGTATCAGTTAGAAGCAGAGCCCATAGCAGGAGCAGAAACTTACTATGTAGATGGGGCAGCTAACAGGGAAACTAAAATAGGAAAAGCAGGATATGTCACTGACAAAGGAAAACAAAAGGTTGTTGCCCTAACAGAAACTACAAATCAGAAGACTGAATTACAAGCAATTTATCTAGCTTTGCAAGATTCAGGGTTAGAAGTAAACATAGTGACAGATTCACAGTATGCATTAGGAATCATTCAAGCACAACCTGATAAGAGTGAGTCAGAGTTAGTTAATCAAATAATAGAAGAATTAATAAAGAAGGAAAAGGTCTACCTGTCATGGGTACCAGCACACAAAGGAATTGGAGGGAATGAACAAGTAGATAAATTAGTTAGTTCTGGAATCAGAAAAGTACTATTTCTAGATGGGATAGACAAAGCTCAAGAAGCACATGAAAGGTATCACAACAATTGGAGAGCAATGGCTAGTGAGTTTAATCTGCCACCTATAGTAGCAAAAGAAATAGTAGCTAGCTGTGATAAATGTCAGCTAAAAGGAGAAGCCATGCATGGACAAGTGGACTGTAGCCCAGGAATATGGCAATTAGATTGTACACATTTAGAAGGAAAAGTTATTCTGGTAGCAGTCCACGTAGCCAGTGGCTATATASAACCAGAAGTCATCCCAGCAGAAACAGGACAGGAAACAGCATATTTTATATTGAAACTAGCAGGCAGATGGCCAGTAAAAATGATACATACAGACAATGGCACCAATTTCACAAGTACTGCGGTTAAGGCAGCCTGTTGGTGGGCAGATATCCAACAGGACTTTGGAATTCCCTACAATCCCCAAAGTCAAGGAGTAGTAGAATCTATGAATAAGGAATTAAAAAAGATCATAGGGCAGGTAAGAGACCAAGCTGAACACCTTAGGACAGCAGTACAAATGGCAGTATTCATTCACAATTTTAAAAGAAAAGGGGGGATTGGGGGGTACAGTGCAGGGGAAAGAATAATAGACATAATAGCAACAGACATACAAACTAAAGAATTACAAAAACAAATTTCAAATATTCAAAAATTTCGGGTTTATTACAGGGACAGCAGAGACCCAATTTGGAAAGGACCAGCAAAACTCCTCTGGAAAGGTGAAGGGGCAGTAGTAATACAAGACAATAGTGAAATAAAAGTAGTACCAAGAAGAAAGGCAAAAATCATTAGGGATTATGGAAAACAGATGGCAGGTGATGATTGTGTGGCAGGTAGACAGGATGAGGATTAACAAATGGAAAAGCTTAGTAAAGTACCATATGTATATTTCAAAGAAAGCTAACAGATGGGTTTATAGACATCATTATGACAGCCCTCATCCAAGGATAAGTTCAGAAGTACACATCCCATTAGGGGATGCTAGGTTAGTTATAACAACATACTGGGGTCTGCATACAGGAGAAAGAGACTGGCATTTAGGCCAGGGAGTCTCCATAGAATGGAGGCAGAAAAGGTATAGCACACAAGTAGACCCTGGCTTGGCAGACCAACTAATTCATACCCATTATTTTGATTGTTTTTCAGAATCTGCCATAAGGGGAGCCATATTAGGACGAGTAGTTAGTCCTAGGTGTGAATATCAAGCAGGACATAACCAGGTAGGATCTCTACAGTATTTGGCACTGACAGCATTAGTTGCACCAAAAAAGACAAAGCCACCTTTGCCTAGTGTTAAAAAGCTAGTAGAGGATGGATGGAACAAGCCCCAGAAGACCAGGGGCCACAGAGGGAGCCACACAATGAATAGACACTAGAGCTTTTAGAGGAGCTTAAGAGTGAAGCTGTCAGGCATTTTCCTAGAGACTGGCTCCATCAATTAGGACAGCATATCTATAATACCTATGGAGATACTTGGGGAGGAGTCGAGGCTTTAATAAGAACTCTGCAACAACTACTGTTTATTCATTTCAGAATTGGGTGCCATCATAGCAGAATAGGCATTATTCGACAGAGAAGAGTAAGAAATGGACCCAGTAGATCCTAACCAAGAGCCCTGGAACCATCCAGGAAATCAGCCTAAAACTCCTTGTAACAATTGTTATTGTAAACAGTGCAGCTTTCATTGCCAATTGTGCTTTTTAAAGAAAGGCTTAGGCATTTCCTATGGCAGGAAGAAGCGGAGCCGGCGACGAGCAACTCCCGCAAGTGTGCAAGATCATCAAAATCATATACCAAAGCAGTAAGTATCCTGCATGTATATAATAGGAATAGGAATAGGAGCCCTAATAGTAGCATTTATCATAGCCATAGTAGTGTGGACCATAGTATATATAGAATATAGGAAGTTGGTAAAGCAAAAGAAAATAGACAGGTTAATTCAGAGAATCATAGAAGGAGCAGAAGACAGTGGCAACGAGAGTGATGAGGAATTATCCACAATGGTGGAGAGGGGGCATCTTACTTTTGGGTATGTTGCTGATTTATAGTGCTGCAGGAAACTTGTGGGTTACAGTATATTATGGGGTGCCTGTGTGGAAAGAAGCAAAAACCACTCTATTCTGTGCATCAGATGCTAAGGCATATGAGCCAGAAAAGCATAATGTCTGGGCTACACATGCCTGTGTACCCACAGACCCCAGCCCACAAGAGATGGTCCTGGCAAATGTAACAGAGAACTTTAATATGTGGGACAATGATATGGTAGAGCAGATGCAGACAGACATAATCAGTTTATGGGATCAAAGCTTAAAGCCATGTGTAAAATTAACCCCACTCTGTGTTACTCTAGACTGTAGTAATATAACTAGAAATGATACTAACAGTAGCAGCACTGTCAATGCCACTAGCAGTCCTTCAGCAAATGAATTAACAAATTGCTCTTTCAATGTAACTACTGTAATAAGAGATAAGCAGCAGAGAGTACATGCACTCTTTTATAGACTTGATGTAGTGCCAATTGATGAGACTAGTAATAATAATAATAGTAATAGTACTAAGTACAGGCTAATAAATTGCAATACCTCAGTCATTACACAGGCTTGCCCAAAGGTATCTTTTGATCCCATCCCTATACATTATTGTGCTCCAGCTGGTTTTGCGATTTTAAAGTGTAACAATAAAACGTTTAATGGAACAGGACCATGTACAAATGTCAGCACAGTACAATGTACACATGGAATTAAGCCAGTGGTATCAACTCAACTGCTATTAAATGGAAGCCTAGCAGAAGGACAGGTCATAATTAGATCTAAAAATATCTCAGACAATACCAAAAACATAATAGTACAGCTTGATAGTCCTATAGAAATTACCTGTACCAGACCTAACAATAATACAAGAAAAGGTATACATTTCGGGCCAGGGCAAGCATTCTATGCAACAGGTGATATCATAGGAAACATAAGACAAGCACATTGTAATGTTAGTGAAGAGAAATGGAATAAGACTTTACAACAGATAGCTACACAATTAAGTAAATACTTTGTCAATAGAACATTAATTTTTAAACCACACTCAGGAGGGGACCTGGAAGTTACAACACATAGTTTTAACTGTAGAGGAGAATTTTTCTATTGCAATACATCAGGGCTGTTTAATAGTAGTTGGACTGGGGACAATATTAATATGCCAAATGACACAGGAAAAAATATTACACTGCCATGCAGAATAAAACAAATTGTAAATATGTGGCAGAGAGTAGGACAAGCAATGTATGCTCCTCCCATTAAAGGAAGCATTACATGTGTATCAAATATTACAGGATTAATCCTGACTTATGACGAAGATAAGGGAAATAATGATAATGTTACCTTCAGACCTGGAGGAGGAGATATGAGGGACAATTGGAGAAGTGAATTATATAAATATAAAGTAGTAAAAATTGAACCACTGGGAGTAGCACCCACCGAGGCAAGGAGAAGAGTGGTGGAGAGAGAAAAAAGAGCTGTGGGAATGGGAGCTTTTTTCCTTGGGTTCTTGGGAGCAGCTGGAAGCACTATGGGCGCAGCGTCAATAACGCTGACGGTACAGGCCAGGCAATTATTGTCTGGTATAGTGCAGCAGCAAAGCAATTTGCTAAGAGCTATACAGGCGCAACAGCACATGTTGCAGCTCACGGTCTGGGGTGTTAAACAGCTCCAGGCAAGAGTCCTAGCTGTGGAAAGATACCTAAAGGATCAACAGCTCCTGGGGATTTGGGGTTGCTCTGGAAAACTCATCTGCACCACTAATGTGCCTTGGAACTCTACTTGGAGTAATAAATCTCTGGCTGAAATTTGGGACAACATGACTTGGATGGAGTGGGATAGACAAATTGACAATTACACAGAGGTAATATACAGATTGCTTGAACTCTCGCAAACCCAGCAGGAACAGAATGAACAAGATTTATTAGCATTGGACAAATGGGACAGTTTGTGGAATTGGTTTAGCATAACAAACTGGCTGTGGTATATAAAAATATTCATAATAATAGTAGGAGCTTTGATAGGGTTAAGAATAATTTTTGCTGTGCTTTCTATAGTAGGTAGAGTTAGGCAGGGATACTCACCTTTGTCTTTTCAGACCCTTATCCCGAACCCGCGGGGACCCGACAGGCCCGAAGGAATAGAAGAAGAAGGTGGCGAGCAAGACAGAGGCAGATCCGTGCGATTAGTGAACGGATTCTTACCGATTGTCTGGGACGACCTCCGGAGCCTGTGCCTCTTCAGCTACCGCCTCTTGAGAGACTCACTCTTGATTGTAATAAGGACTGTGGAACTTCTGGGGAGAAGGGGAAGGGAGGCCCTCAAATACCTGTGGAATCTTCTACAGTATTGGGGACAGGAACTAAAGAATAGTGCTATTAATTTGCTTAACACCACAGCAATAGTAGTAGCTGAGGGAACAGATAGAATTATAGAAATAGTGCAAAGAGCTTGGAGAGCTGTTCTCCACATACCTAGAAGAATAAGACAGGGCCTTGAAAGGATTTTGCTATAACAATGGGAGGCAAATGGTCAAAAAGTAGTATAGTTGGGTGGCCTGCTGTAAGGGAAAGAATAAGGCGAGCTCAGCCAGCAGCAGATGGGGTAGGAGCAGTATCTCGAGACTTGGATAGACGAGGGGCAGTCACAATCAATAATACAGCAGCTACTAATCCTGATGTTGCCTGGCTGGAAGCACAAGAGGAGGCGGAGGAAGTAGGCTTTCCAGTCAGGCCCCAGGTACCTTTAAGACCAATGACCTATAAGGCAGCTCTGGATCTCAGCCACTTTTTAAAAGAAAAGGGGGGACTGGATGGGTTAATTTACTCCAAGAAAAGACAAGAGATCCTTGATTTATGGGTCTATAACACGCAAGGCTATTTCCCTGATTGGCAGAACTACACACCAGGGCCAGGGGAGGGATACCCCCTGACCTTTGGGTGGTGTTTCAAGCTAATACCAGTAGATCCACAGGAGGTAGAAAGGGCCAATGAAGGAGAGAACAACTGCCTGCTATACCCTATATGCCAGCATGGAATGGAGGACGAAGAGGGAGAAGTGCTGATGTGGAAGTTTGACAGTCGCCTAGCCTTCACACACACAGCCCGAGAGAAACATCCGGAGTTCTACAAAGACTGCTGATACAGAAGATTCTGACAGGGACTTTCCGCTGGGACTTTCCGGGGAGGCGCGGTCTGGGCGGGGATTGGGAGTGGCTTACCCTCAGATGCTGCATATAAGCAGCTGCTTCTCGCTTGTACGGGGTCTCTTTGGTTAGACCAGATCTGAGCCTGGGAGTTCTCTGGCTGGCCAAGGAACCCACTGCTTAAGCCTCAATAAAGCTTGCCTTGAGGGCGCATGC
>A1.UA.01.01UADN121.DQ823358_J.SE.94.SE7022.AF082395
GCGAGAGCGTCAGTATTAAGCGGGGGAAAATTAGATGCATGGGAAAAAATTCGGTTAAGGCCAGGGGGAAAGAAACAATATAGAATAAAACACCTAGTATGGGCAAGCAGGGAGCTGGAAAGATTCGCGCTTAACCCTAGCCTTTTAGAGACATCAGAAGGATGTCAACAAATACTGGAACAGTTTCAATCAACTCTCAAGGCAGGATCAGAAGAACTTAAATCATTATATAATACAGTAGCAACCCTCTATTGTGTACATCAACGGATAGAGATAAAAGACACCAAGGAAGCTTTAGATAAAATAGAGGAAATTCAAAACAAAAACAAACAGCAGACACAGAAAGCAGAAACTGACAAAAAAGACAACAGTCAGGTCAGTCAAAATTATCCTATAGTGCAGAATCTGCAAGGGCAACCGGTACACCAGGCCTTATCACCTAGAACTTTAAATGCATGGGTAAAAGTGATAGAAGAGAAAGCCTTCAGCCCAGAAGTGATACCCATGTTTTCAGCATTATCAGAAGGAGCCACCCCGCAAGATTTAAACACCATGCTAAACACAATAGGGGGACACCAAGCAGCTATGCAAATGTTAAAAGATACTATCAATGAGGAAGCTGCAGAATGGGACAGGGTACATCCAGTACATGCAGGGCCTGTTGCACCAGGCCAGGTGAGAGAACCAAGGGGAAGTGATATAGCAGGAACTACTAGTAACCTCCAGGAACAAATAGGATGGATGACAGGCAACCCACCGATCCCAGTAGGAGAAATTTATAAAAGGTGGATAATTCTGGGACTAAATAAAATAGTGAGAATGTATAGCCCTGTCAGCATTTTGGATATAAGACAAGGACCAAAAGAACCTTTCAGAGACTATGTAGACAGATTCTTTAAAGCTCTAAGAGCTGAGCAAGCTACACAGGATGTAAAAAATTGGATGACAGATACCTTGTTGGTCCAAAATGCAAATCCAGATTGCAAGACCATTTTAAAAGCATTAGGATCAGGAGCTACACTAGAAGAAATGATGACAGCATGTCAGGGAGTGGGAGGACCTGGTCATAAAGCAAGAGTTTTGGCTGAAGCAATGAGCCAAGTGACCAATACAAACATAATGATGCAAAGAGGTAACTTTAGGGATCATAAAAGAATTGTTAAGTGTTTCAATTGTGGCAAACAAGGACACATAGCAAAAAACTGCAGGGCCCCTAGAAAAAAGGGCTGTTGGAAATGTGGAAAGGAAGGACACCAAATGAAAGACTGCACTGAGAGACAGGCTAATTTTTTAGGGAAGATTTGGCCTTCCAGCAAAGGGAGGCCAGGGAATTTTCTCCAGAGCAGACCAGAGCCAACAGCCCCACCAGCAGAGAGCCTCGGGTTCGGAGAGGAGATCCCCTCCCCGAAACAGGAGCCGAAGGACAAGGAACTGTATCCTCTAACTTCCCTCAGATCACTCTTTGGCAGCGACCCCTTGTCACAATAAGAATAGGGGGGCAGCTAAGGGAAGCTCTATTAGATACAGGAGCAGACGATACAGTATTAGAAGAAATAGATTTGCCAGGAAAATGGAAACCAAAAATGATAGGGGGAATTGGAGGTTTTATCAAAGTGAGACAGTATAATGAGGTACCCATAGAAATTGAGGGAAAAAAGGCTATAGGTACAGTATTAATAGGACCTACACCTGTCAACATAATTGGAAGAAACATGTTGACTCAGCTTGGTTGTACTTTAAATTTTCCAATTAGTCCTATTGAAACTGTACCAGTAAAATTAAAGCCAGGAATGGATGGCCCAAAAATTAAACAATGGCCATTGACAGAAGAAAAAATAAAAGCATTAACACAAATTTGTGCAGAACTGGAAGAGGAGGGAAAAATTTCAAGAATTGGGCCTGAAAATCCATATAACACCCCAGTATTTGCCATAAAGAAAAAAGACAGTACTAAATGGAGAAAATTAGTAGATTTTAGAGAACTCAATAAAAGAACTCAAGACTTCTGGGAAGTTCAGTTAGGAATACCACATCCAGCAGGGTTAAAAAAGAAAAAATCAGTCACAGTACTGGATGTGGGGGATGCATATTTTTCAGTCCCTTTATATGAAGATTTCAGGAAGTATACTGCATTCACTATACCTAGTATAAACAATGAGACACCAGGGATCAGATATCAGTACAACGTGCTACCACAGGGATGGAAAGGATCACCAGCAATATTTCAGTGTAGCATGACAAAAATCTTAAAACCTTTTAGAGAAAGAAACCCAGAAATAGTTATCTACCAGTACATGGATGACTTGTATGTGGGATCTGACTTGGAAATAGAACAGCATAGAAGAAAAATAAAGGAGCTGAGGGAACATCTATTGAAGTGGGGATTTTACACACCAGATAAAAAACATCAGAAAGAACCTCCATTTCTTTGGATGGGATATGAGCTCCATCCTGACAAATGGACAGTACAACCTATACAGCTGCCAGAAAAAGAAGATTGGACTGTCAATGATATACAAAAGTTAGTGGGAAAACTAAATTGGGCAAGTCAAATTTATCCAGGAATTAAAATAAAGGAACTATGTAAACTCATTAGGGGGGCTAAAGCACTAACAGACATAGTACCATTGACTAGAGAAGCAGAATTGGAACTGGCAGAAAACAAGGAGATTCTAAAAGAACCAGTACATGGGGTATATTATGACCCAGCAAGAGAATTAATAGCAGAAGTGCAGAAACAAGGACTGGACCAATGGACATATCAAATTTATCAGGAGCCATTTAAAAACCTGAAAACAGGGAAATATGCAAAAAGGAGGAGTGCCCACACTAATGATGTAAAGCAATTATCACAAGTGGTGCAAAAAATAGCCTTGGAAGCCATAGTGATATGGGGAAAAACTCCTAAATTTAGACTACCCATACAAAAGGAAACATGGGAGACATGGTGGACAGACTATTGGCAGGCCACCTGGATTCCTGAGTGGGAGTTTGTCAATACCCCCCCTCTAGTAAAATTATGGTACCAATTAGAAAAGGAACCCATAATGGGAGCAGAAACTTTCTATGTAGATGGGGCATCTAACAGGGAAACTAAAGTAGGAAAGGCAGGGTATGTTACTGACAAAGGAAGACAGAAAGTAATTACCCTAACTGACACAACAAATCAGAAGACTGAACTACAAGCCATTTATTTAGCTTTACAGGATTCAGGGATAGAAGTAAACATAGTAACAGATTCACAATATGCATTGGGGATTATTCAAGCACAACCAGATAAGAGTGAATCAGAATTAGTCAATCAAATAATAGAGGAGTTAATAAAGAAGGAAAAGGTCTACCTGTCGTGGGTACCAGCACACAAAGGAATTGGAGGAAATGAACAAGTAGATAAATTAGTCAGTTCTGGAATCAGGAAAGTGCTGTTTCTAGATGGGATAGATAAAGCTCAAGAAGAACATGAAAAATATCATAGCAATTGGAGAGCAATGGCTAGTGATTTTAATCTACCACCTGTAGTAGCAAAAGAAATAGTAGCTAGCTGTGATAAATGTCAGCTAAAGGGGGAAGCCATGCATGGACAAGTAGACTGTAGTCCAGGGATATGGCAATTAGATTGTACACATTTAGAAGGAAAAGTTATCCTGGTAGCAGTTCATGTAGCCAGTGGCTATATAGAAGCAGAAGTTATCCCAGCAGAAACAGGACAGGAAGCAGCATTTTTTATATTAAAATTAGCAGGCGGATGGCCAGTAAAAGCAATACATACAGATAATGGCAGCAACTTCACCAGTGGTGCTGTGAAGGCAGCCTGTTGGTGGGCAGATATCAAACAGGAATTTGGAATTCCCTACAATCCCCAAAGTCAAGGAGTAGTAGAATCTATGAATAAAGAATTAAAGAAAATCATAGGACAGGTAAGAGAACAAGCTGAACACCTTAAGACAGCAGTACAGATGGCAGTATTCATACACAATTTTAAAAGAAAAGGGGGGATTGGGGGATACAGTGCAGGGGAAAGAATAATAGACATAATAGCAACAGACATACAAACTAAAGAATTACAAAAACAAATCACAAAAATTCAAAATTTTCGGGTTTATTACAGGGACAGCAGAGACCCAATTTGGAAAGGACCAGCAAAACTGCTCTGGAAAGGTGAAGGGGCAGTAGTAATACAAGACAATAGTGAAATAAAGGTAGTACCAAGAAGAAAAGCAAAGATCATTAGAGATTATGGAAAACAGATGGCAGGTGATGATTGTGTGGCAGGTAGACAGGATGAGGATTAACACATGGAAAAGTTTAGTAAAGTACCATATGAATGTTTCAAAGAAAGCTAGACAATGGCTGTATAGACATCACTATGATAGCCGTCATCCAAAAATAAGTTCAGAAGTACACATCCCACTAGGAGAGGCTAGATTAGTAGTAACAACATATTGGGGTCTGCAAACAGGAGAAAGAGATTGGCACTTGGGTCAGGGAGTCTCCATAGAATGGAGGCGGAAAAGGTACAGAACACAAGTAGACCCTGGCCTGGCAGACCAACTAATTCATATGCATTACTTTGATTGTTTTTCAGACTCTGCCATAAGGAAGGCCATATTAGGACAAATAGTTAGCCCTAGGTGTGACTACCAAGCAGGACATAACAAGGTAGGATCTCTACAATATCTGGCATTAACAGCATTAATAAAACCAAAAAGGAGAAAGCCACCTTTGCCTAGTGTTCAGAAACTAGTAGAGGATAGATGGAACAAGCCCCAGAAGACCAGGGACCACAGAGAGAGCCATACCATGAATGGACACTAGAGCTTTTGGAGGAGCTTAAAAATGAAGCTGTTAGACACTTTCCTAGGCCATGGCTCCATGGTTTAGGACAGTATGTCTATAGCACTTATGGAGATACATGGGAAGGAGTCGAAGCCGTAATAAGAATACTGCAACAACTATTGTTTATTCATTTCAGAATCGGGTGCCATCATAGCAGAATAGGCATTATACCACAGAGAAGAGGGAGGAATGGAGCCAGTAGATCCTAACAGAGAGCCCTGGAACCATCCAGGAAGTCAGCCTAAAACTGCTTGTACTAATTGTTATTGTAAAAAGTGTTGCTATCATTGTCAAGTGTGCTTTCTACAGAAGGGCTTAGGCATTTCCTATGGCAGGAAGAAGCGGAGACAACGACGATCAGCTCCTCCTGGCAGTAAGAATCATCAAGATCTTATACCAGAGCAGTAAGTAACTTAATTAGCATATGTAATGGTATCTTTACAAATAGTAGCAATAGTAGCATTAATAGTAGCATTTTTCCTTGCAATATGTGTGTGGACTATAGTGTATATAGAATATAAGAAACTGTTAAGACAAAGGAAAATAGATAAGTTAATTAATAGAATAAGAGAAAGGGCAGAAGACAGTGGTAACGAGAGTGATGGAGACACAGACGAGTTGGCTGAGCTTGTGGAGATGGGGCCTCATGATCTTTGGAATGTTAATGATTTGTAGTGCTAGAGAAAACTTGTGGGTCACAGTCTATTATGGGGTACCTGTATGGAGAGATGCAAAGACCACTTTATTTTGCGCATCTGATGCTAAAGCATATAGTACTGAAAAACATAATGTCTGGGCTACACATGCTTGTGTACCCACAGATCCAAACCCACAAGAGATGAGTCTGCCAAATGTAACAGAAAATTTTAACATGTGGAAAAATGACATGGTAGACCAGATGCAGGAAGATATAATCAGTGTATGGGATGAAAGCTTAAAGCCATGTGTAAAGATAACCCCTCTCTGTGTCACTTTAAATTGTAGCGACGTCAATAGTAACAATAGTACAGATAGTAATAGTAGTGCAAGCAACAATAGTCCTGAAATCATGAAAAACTGCTCTTTCAATGTAACTACAGAAATAAGAAATAAAAGGAAGCAAGAATACGCGCTTTTCTATAGACAAGATGTAGTACCAATTAATAGTGACAATAAAAGTTATATTCTAATAAACTGTAATACCTCAGTTATTAAACAGGCTTGTCCAAAGGTGTCTTTTCAACCAATTCCCATACATTATTGTGCTCCAGCTGGTTTTGCGATTCTAAAATGTAATAATAAGACTTTCAATGGAACAGGACCATGCAAAAATGTCAGTACAGTACAATGTACACACGGAATTAAGCCAGTGGTATCAACTCAACTACTGCTAAATGGCAGTGTAGCAGAAGGAGACATAATAATTAGATCTGAAAATATCTCAGACAATGCTAAAAACATAATAGTACAACTTAATGACACTGTAGAAATTGTGTGTACCAGACCTAATAACAATACAAGAAAAGGTATACACATGGGACCAGGACAAGTGCTCTACGCAACAGGGGAAATAATAGGAGATATAAGGAAAGCATATTGTAACATTAGTAGAAAAGATTGGAATAACACTTTACGTAGAGTAGCTAAAAAACTAAGAGAACACTTTAATAAAACAATAGACTTTACATCACCCTCAGGAGGGGACATAGAAATTACAACACATAGTTTTAATTGTGGAGGAGAATTTTTCTATTGTAATACATCAACACTGTTCAATAGTAGTTGGGATGAGAATAACATTAAGGACACAAATAGTACAAATGACAACACAACTATCACAATACCATGTAAAATAAAACAAATTGTGAGAATGTGGCAAAGAACAGGACAAGCAATATATGCCCCTCCCATCGCAGGAAACATTACATGCAAATCAAATATTACAGGATTATTATTGACACGTGATGGAGGAAACAGGAATGGCAGTGAGAATGGCACTGAGACCTTCAGACCTACAGGAGGAAATATGAAAGATAATTGGAGAAGTGAATTATATAAATATAAAGTAGTAGAGCTTGAGCCACTAGGAGTAGCACCCACCAAGGCAAAAAGAAGAGTGGTGGAGAGAGAAAAAAGAGCAGTGGGAATAGGAGCTGTGTTCCTTGGGTTCTTGGGAACAGCAGGAAGCACTATGGGCGCAGCGTCAATAACGCTGACGGTACAGGTCAGACAATTGTTGTCTGGCATAGTGCAACAGCAAAGCAATTTGCTGAAGGCTATANAAGCGCAACAGCATCTGTTGAAGCTCACTGTCTGGGGCATTAAGCAGCTCCAGGCAAGAGTCCTGGCTGTGGAAAGATACCTAAAGGATCAACAGCTCCTAGGAATTTGGGGCTGCTCTGGAAAACTCATCTGCACCACTAATGTGCCCTGGAATGCTAGTTGGAGTAATAAATCTTATGAGGACATTTGGGAGAACATGACCTGGATACAATGGGAAAGGGAAATTAACAATTACACAGGAATAATATACAGTCTAATTGAAGAAGCACAAAACCAGCAGGAAACTAATGAAAAGGACTTATTGGCATTGGACAAGTGGACAAATTTGTGGAATTGGTTTAACATATCAAACTGGCTGTGGTACATAAAAATATTCATAATGATAATAGGAGGCTTAATAGGTTTAAGAATAATTTTTGCTGTGCTTGCTATAGTAAATAGAGTTAGGCAGGGATACTCACCTTTGTCATTTCAGACCCTTATTCCAAACCCAACGGAAGCCGACAGGCCCGGAGGAATCGAAGAAGGAGGTGGAGAGCAAGGCAGAACCAGATCGATTCGATTAGTGAACGGATTCTTAGCTCTTGCCTGGGACGACCTGCGGAGCCTGTGCCTCTTCAGTTACCACCGATTGAGAGACTTCGTCTTGATTGCAGCGAGGACTGTGGGAACTCTGGGACTCAGGGGGTGGGAGATCCTCAAATATCTGGTGAACCTTGTATGGTATTGGGGGCAGGAACTAAAGAATAGTGCTATTAGTTTGCTTAATACCACAGCAATAGCAGTAGCTGAAGGAACAGATAGAATCATAGAAATAGCACAAAGAGCTTTTAGAGCTATTCTTCACATACCTAGAAGAATAAGACAGGGTTTAGAAAGAGCTTTGCTATAAAATGGGGAACAAGTGGTCAAAAAGTTGGCCTCAGGTAAGGGACAGAATGAGGCGAGCTGCTCCTGCTCCAGCAGCAGATGGAGTGGGAGCAGTGTCTCAAGATTTGGCTAAGCATGGGGCAATCACAAGCAGCAATACAGCAGCTACAAATGATGACTGTGCCTGGCTGGAAGCACAAACAGAGGAGGAGGTTGGATTTCCAGTCAGACCTCAGGTWCCATTAAGACCAATGACATACAAAGGAGCTTTTGATCTTAGCTTCTTTTTAAAAGAAAAGGGGGGACTGGATGGGTTAATTTACTCCAAGAAAAGACAAGAGATCCTTGATCTGTGGGTTCATAACACACAAGGTTACTTCCCTGACTGGCAAAACTACACACCAGGGCCAGGGACCABATACCCATTGACATTTGGATGGTGCTTCAAGCTAGTACCAGTTGATCCAAGCGAAGTAGAGGAAGCTAATGAAGGAGAGAACAACTGCCTGTTACACCCCGCATGCCAGCATGGAATAGAGGATGAAGAAAGAGAAGTGCTAAAGTGGAAGTTTGACAGCTCCCTAGCACGGAGACACATAGCCCGAGAGCTACATCCGGAGTTTTACAAAGACTGCTGACAAAGAAGTTTCTAGCGGGGACTTTCCGCTGGGGACTTTCCAGGGGAGGTGTGGCCTGGGCGGGGTTGGGGAGTGGCTAACCCTCAGATGCTGCATATAAGCAGCTGCTTTTCGCTTGTACTGGGTCTCTCTTGTTAGACCAGATCTGAGCCTGGGAGCTCTCTGGCTAACTAGGGAACCCACTGCTTAAGCCTCAATAAAGCTTGCCTTGAGGGCGCATGCAAGCCG
>A1.UA.00.98UA0116.AF413987_J.SE.93.SE7887.AF082394
TGGATGGGTTAATCTACTCCAAGAAAAGACAAGAAATCCTTGATCTGTGGGTCTATCACACACAAGGTTACTTCCCTGATTGGCAGAATTATACCCCAGGGCCAGGGATTAGATTCCCACTAACATTTGGGTGGTGCTACAAGCTAGTACCAGTTGACCCAGCTGACGTAGAAGAGGCCACAGAGGGAGAGAACAACAGCCTATTACACCCTATATGCCAACACGGAATGGATGATGAGGAAAAAGAAGTGTTAATGTGGAAGTTTGACAGTCGCCTGGCTCTAACACACAGAGCCCGAGAGCTGCATCCGGAGTTTTACAAAGACTGCTGACACAGACTGCTGACATGAAGTTGCTGACAGGGACTTTCCGCGGGGACTTTCCAGGGGAGGTGTGGTTTGGGCGGAGTCGGGGAGTGGCTAACCCTCAGATGCTGCATATAAGCAGCTGCTTTTCGCCTGTACTGGGTCTCTCCGGTTAGACCAGATCGAGCCTGGGAGCTCTCTGGCTAGCTAGGGAACCCACTGCTTAAGCCTCAATAAAGCTTGCCTTGAGTGCTTTAAGTAGTGTGTGCCCGTCTGTTGTATGACTCTGGTAACTAGAGATCCCTCAGACTACTCTAGGCAGTGTAAAAATCTCTAGCAGTGGCGCCCGAACAGGGACTCGAAAGCGAAAGTTCCAGAGAAGTTCTCTCGACGCAGGACTCGGCTTGCTGAGGTGCACACAGCAAGAGGCGAGAGCGGCGACTGGTGAGTACGCCTAAGGATTTTTGACTAGCGGAGGCTAGAAGGAGAGAGATGGGTGCGAGAGCGTCAGTATTAAGCGGGGGAAAATTAGATGCATGGGAAAAAATTCGGTTAAGGCCAGGGGGAAAGAAAAAATATAGAATAAAACACCTAGTATGGGCAAGCAGGGAGCTGGAAAGATTCGCGCTTAACCCTAGCCTTCTAGAAACATCAGAAGGATGTCAACAAATACTGGAACAGTTACAACCAACTCTCAAGACAGGATCAGAAGAAGTTAAATCATTATATAATACAGTAGCAACTCTCTATTGTGTACATCAACGGATAGAGATAAAAGACACCAAGGAAGCTTTGGATAAAATAGAGGAGATACAAAATGAGAACAAGCAAAAGACCCAACAGGCAACTGGCACAGGAAGCAGCAGCAAAGTCAGTCAAAATTACCCCATAGTGCAAAATGCACAAGGGCAAATGACACACCAGTCCATGTCACCTAGGACTTTAAATGCATGGGTGAAAGTAATAGAAGAAAAGGCTTTCAGCCCAGAAGTAATACCCATGTTTTCAGCATTGTCAGAGGGAGCCACCCCACAAGATTCAAACATGATGCTGAACATAGTGGGGGGACACCAGGCAGCTATGCAAATGTTGAAAGATACCATCAATGAGGAAGCTGCTGAATGGGATAGGTTACATCCAGCACAGGCAGGGCCTTTTCCACCAGGGCAGATGAGAGAACCAAGGGGAAGTGACATAGCAGGAACTACTAGTACCCTTCAAGAACAAATAGGATGGATGACAAGCAACCCACCTATCCCAGTGGGAGACATCTATAAAAGATGGATAATCCTAGGATTAAATAAGATAGTAAGAATGTATAGCCCTGTTAGCATTTTAGACATAAGACAAGGGCCAAAAGAACCCTTCAGAGACTATGTAGATAGGTTCTTTAAAACTCTTAGAGCTGAGCAAGCTACACAGGAGGTAAAGAACTGGATGACAGAAACCCTGCTGGTCCAAAATGCAGATCCAGATTGTAAAGCCATTTTAAGAGCATTAGGACCAGGGGCTACATTAGAAGAAATGATGACAGCATGCCAGGGAGTGGGAGGACCCGGCCATAAAGCCAGGGTTTTGGCTGAGGCCATGAGTCAAGTACAAAATGCAAACATAATGATGCAGAAAAGTAATTTTAGGGGCCCAAAAAGAATTAAGTGTTTCAACTGTGGCAAAGAAGGACACCTAGCCAGAAATTGCAGGGCCCCTAGGAAAAAGGGCTGTTGGAAATGTGGAAAGGAAGGCCATCAAATGAAAAACTGCACTGAGAGACAGGCTAATTTTTTAGGAAGAATTTGGCCTTCCAGCAAAGGGAGGCCAGGAAATTTTCCTCAGAGCAGACCAGAGCCATCAGCCCCACCAGCAGAAGACTTTGGGAGGGGGGAAGAGATAACCCCCCCCCTGAAACAGGAACAGAAAGACAGGGAACAGCATCCTCCTTCAATTTCCCTCAAATCACTCTTTGGCAACGACCCCTTGTCACAGTAAGAATAGGAGGACAGCTAAAAGAAGCTCTATTAGATACAGGAGCAGATGATACAGTATTAGAAGACATAGATTTGCCAGGAAAATGGAAACCAAAAATGATAGGGGGAATTGGAGGTTTTATCAAGGTAAGACAGTATGATCAAATACTTATAGAAATTTGTGGAAAAAAGGCTATAGGTACGGTATTAGTAGGACCTACCCCTGTCAACATAATTGGAAGAAATATATTGACTCAGCTTGGTTGTACTTTAAATTTTCCAATAAGTCCTATTGAAACTGTACCAGTAACATTAAAGCCAGGAATGGATGGCCCAAAGGTTAAACAATGGCCATTAACAGAGGAGAAAATAAAAGCATTAACAGAAATTTGTGCAGAAATGGAAGAGGAAGGAAAAATTTCAAGAGTTGGGCCTGAAAATCCATATAACACTCCAGTATTTGCCATAAAGAAAAAAGACAGTACTAAATGGAGAAAATTAGTAGATTTTAGAGAACTCAATAAAAGAACTCAAGACTTCTGGGAAGTTCAGTTAGGAATACCACATCCAGCAGGGTTAAAAAAGAAAAAATCAGTCACAGTACTGGATGTGGGGGATGCATATTTTTCAGTCCCTTTATATGAAGATTTCAGGAAATATACTGCATTCACTATACCTAGTATAAACAATGAGACACCAGGGATCAGATATCAGTACAACGTGCTACCACAGGGATGGAAAGGATCCCCAGCAATATTTCAGTGTAGCATGACAAAAATCTTAAAACCTTTTAGAGAAAGAAACCCAGAAATAGTTATCTACCAGTACATGGATGACTTGTATGTGGGATCTGACTTGGAAATAGAACAGCATAGAAGAAAAATAAAGGAGCTGAGGGAACATCTATTGAAGTGGGGATTTACCACACCAGATAAAAAACATCAGAAAGAACCTCCATTTCTTTGGATGGGATATGAGCTTCATCCTGACAAATGGACAGTCCAACCTATACAACTGCCAGAAAAAGAAGACTGGACTGTCAATGATATACAAAAGTTAGTGGGAAAACTAAATTGGGCAAGTCAGATTTATCCAGGAATTAAAGTAAAGCAACTATGTAAACTCCTTAAAGGGGCTAAAGCACTAACAGACATAGTACCATTGACTAGAGAAGCAGAATTGGAACTGGCAGAAAACAAAGAGATTCTAAAAGAACCAGTACATGGGGTATATTATGACTCAGCAAAAGAATTAATAGCAGAAGTGCAGAAACAAGGGCTGGACCAATGGACATATCAAATTTATCAGGAGCCATTTAAAAACCTGAAAACAGGGAAATATGCAAAAAGGAGGAGTGCCCACACTAATGATGTAAAACAATTAGCAGAAGTGGTGCAAAAAATAGCCTTGGAAGCCATAGTAATATGGGGAAAAACTCCTAAATTTAGACTACCCATACAAAGAGAAACATGGGAGACATGGTGGACAGACTACTGGCAGGCCACCTGGATTCCTGAGTGGGAGTTTGTCAATACCCCCCCTCTAGTAAAGTTATGGTACCAATTAGAAAAGGAACCCATAATGGGAGCAGAAACTTTCTATGTAGATGGGGCATCTAACAGGGAGACTAAAACAGGAAAGGCAGGGTATGTTACTGACAAAGGAAGACAGAAAGTAGTTACCCTAACTGACACAACAAATCAGAAGACTGAACTACACGCCATTTATTTAGCTTTACGGGATTCAGGGCTAGAAGTAAACATAGTAACAGATTCACAATATGCATTGGGGATTATACAAGCACAACCAGATAAGAGTGAATCAGAATTAGTCAATCAAATAATAGAGGAGTTAATAAAGAAGGAAAAGGTCTACCTGTCGTGGGTACCAGCACACAAAGGAATTGGAGGAAATGAACAGGTAGATAAATTAGTCAGTTCTGGAATCAGGAAAGTGCTGTTTCTAGATGGGATAGATAAAGCTCAAGAAGATCATGAAAAATATCATAGCAATTGGAGAGCAATGGCTAGTGATTTTAATCTGCCACCTGTAGTAGCAAAAGAGATAGTAGCTAGCTGTGATAAATGTCAGCTAAAGGGGGAAGCCATGCATGGACAAGTAGACTGTAGTCCAGGGATATGGCAATTAGATTGTACACATCTAGAAGGAAAAGTTATCCTGGTAGCAGTTCATGTAGCCAGTGGCTATATAGAAGCAGAAGTTATCCCAGCAGAAACAGGACAGGAAGCAGCATTTTTTATATTAAAATTAGCAGGCAGATGGCCAGTAAAAGTAATACATACAGACAATGGCAGCAACTTCACCAGTGGTGCTGTGAAGGCAGCCTGTTGGTGGGCAGATATCAAGCAGGAATTTGGAATTCCCTACAATCCCCAAAGTCAAGGAGTAGTAGAATCTATGAATAAAGAATTAAAGAAAATCATAGGACAGGTAAGAGAACAAGCTGAACACCTTAAGACAGCAGTACAAATGGCAGTATTCATACACAATTTTAAAAGAAAAGGGGGGATTGGGGGATACAGTGCAGGGGAAAGAATAATAGACATAATAGCAACAGACATACAAACTAGAGAATTACAAAAACAAATTACAAAAATTCAAAATTTTCGGGTTTATTACAGGGACAGCAGAGACCCAATTTGGAAAGGACCAGCAAAACTACCCTGGAAAGGTGAAGGGGCAGTAGTAATACAGGACAATAGTGAAATAAAGGTAGTACCAAGAAGAAAAGCAAAGATCATTAGAGATTATGGAAAACAGATGGCAGGTGATGATTGTGTGGCAGGTAGACAGGATGAGGATTAACACATGGAAAAGTTTAGTAAAGTACCATATGAATGTTTCAAAGAAAGCTAGAAAATGGCTGTATAGGCATCACTATGACAGCAATCATCCAAAAATAAGTTCAGAAGTACACATCCCACTAGGAGAGGCTATATTAGTAATAACAACATATTGGGGTCTGCAGACAGGAGAAAGAGATTGGCACTTGGGTCAGGGAGTCTCCATAGAATGGAGGCAGAGAAGGTACAGAACACAAGTAGACCCTGGCCTGGCAGACCAACTAATTCATATGTGTTACTTTGATTGTTTTTCAGACTCTGCCATAAGGAAGGCCATATTAGGACAAATAGTTAGCCCTAGGTGTGACTACCAAGCAGGACATAACAAGGTAGGATCTCTACAATATCTGGCACTAACAGCATTAATAAGACCAAAAAGGAGAAAGCCACCTTTGCCTAGTGTTCAGAAACTAGTAGAGGATAGATGGAACAAGCCCCAGAAGACCACGGGCCACAGAGAGAGCCATACCATGAATGGACACTAGAGCTTTTGGAGGAGCTTAAAAATGAAGCTGTTAGACACTTTCCTAGGCCATGGCTTCATAGTTTAGGACAGTATATCTATAGCACTTATGGAGATACATGGGAAGGAGTCGAAGCCATAATAAGAATACTGCAACAACTATTGTTTATTCATTTCAGAATCGGGTGCCATCATAGCAGAATAGGCATTATACCACAAAGAAGAGGGAGGAATGGAGCCAGTAGATCCTAACAGAGAGCCCTGGAATCATCCAGGAAGTCAGCCTAAAACTGCTTGTACTAATTGTTATTGTAAAAAGTGTTGCTATCATTGTCAAGTGTGCTTTCTACAGAAGGGCTTAGGCATTTCCTATGGCAGGAAGAAGCGGAGACAGCGACGATCAGCTCCTCCTGGCAGTAAGACTCATCAAGATCTTATACCAAAGCAGTAAGTAAATCAAGTAGCATATGTAATGATACCTTTGCAAATAGCAGCAATAGTAGCATTTATAGTAGCAATTTTCCTTGCAATAGGTATGTGGACTATAGTGTATATAGAATATAAGAAACTGTTAAGACAAAGGAAAATAGATAAGTTAATTGATAGAATAAGAGAAAGAGCAGAAGACAGTGGTAACGAGAGTGATGGAGACACAGAAGAATTGGCAGACCTTGTGGAGAGGGGGCCTCATGATCTTTGGAATGTTAATGATTTGTAAGGCAAAAGAAGACTTGTGGGTCACAGTCTATTATGGGGTACCTGTGTGGAAAGATGCAAAGACCACTTTATTTTGCGCATCTGATGCTAAAGCATATAGTACTGAAAAACATAATGTCTGGGCTACACATGCTTGTGTACCCACAGATCCAAGCCCACAAGAGATGAATCTGCCAAATGTAACAGAAAACTTTAACATGTGGAAAAATGACATGGTAGACCAGATGCAGGAAGATATAATCAGTGTATGGGATGAAAGCTTAAAGCCATGTGTAAAGATAACCCCTCTATGTGTCACTTTAAATTGTAGTAACATCACTAGTAACAGTAATACAACTAGTAACAGTAGTGTAAGTAGTCCTGATATCATGACAAACTGCTCTTTCAATATAACTACAGAAATAAGAAATAAAAGGAAGCAAGAGTACGCGCTTTTCTATAGACAAGATGTAGTACCAATTGATAGTAACAATAAAAATTATATTCTAATAAACTGTAATACCTCAGTCATTAAACAAGCTTGTCCAAAGGTGTCTTTTCAACCAATTCCCATACATTATTGTGCCCCAGCTGGTTTTGCGATTCTAAAATGTAATGATAAGAATTTCAATGGAACAGGATCATGCAAAAATGTCAGTACAGTACAATGTACACACGGAATTAAGCCAGTGGTATCAACTCAACTACTGCTAAATGGCAGTATAGCAGAAGGAGACATAATAATTAGATCTGAAAACATCTCAGACAATGCCAAAAACATAATAGTACAACTTAATAAAACTGTAGAAATTGTGTGTTACAGACCTAATAACAATACAAGGAAAGGTATACACATGGGACCAGGACAAGTGCTCTACGCAACAGGAGAAATAATAGGAAATATAAGAGAAACACATTGTAACATTAGTGAAAGAGATTGGAGTAACACTTTACGTAGAGTAGCTACAAAACTAAGAGAACACTTTAATAAAACAATAAACTTTACATCACCCTCAGGAGGGGATATAGAAATTGTGACACATAGTTTTAATTGTGGAGGAGAATTTTTATATTGTAATACATCAAAACTGTTCAATAGTAGTTGGGATAAGAATAGCATTGAAGCTACAAATGACACAAGTNACGCAACTATCACAATACCATGTAAAATAAAACAAATTGTGAGAATGTGGCAAAGGACAGGACAAGCAATCTATGCCCCTCCCATTGCAGGAAACATTACGTGCACATCAAATATTACAGGATTACTATTGACACGTGATGGAGGAAACAGGGGGAATGGCAGTGAGAATGGCACTGAGACCTTCAGACCTACAGGAGGAAATATGAAGGACAATTGGAGAAGTGAATTATATAAATATAAAGTAGTAGAGATTGAGCCACTAGGAGTAGCACCCACCAAGGCAAAAAGAAGAGTGGTGGAGAGAGAAAAAAGAGCAGTGGGAATAGGAGCTGTGTTCCTTGGGTTCTTGGGAACAGCAGGAAGTACTATGGGCGCAGCGTCAATAACGCTGACGGTACAGGTCAGACAATTGTTGTCTGGCATAGTGCAACAGCAAAGCAATTTGCTGAAGGCTATAGAGGCGCAACAGCATCTGTTGAAACTCACTGTCTGGGGCATTAAGCAGCTCCAGGCAAGAGTCCTGGCTGTGGAAAGATACCTAAAGGATCAACAACTCCTAGGGATTTGGGGCTGCTCTGGAAAACTCATCTGCACCACTAATGTGCCCTGGAATGCTAGTTGGAGTAATAAATCTTATGAGGACATTTGGGAGAACATGACCTGGATACAATGGGAAAGGGAAATTAACAATTACACAGGAATAATATACAGTCTAATTGAAGAAGCACAAAACCAGCAGGAAAATAATGAAAAAGACTTATTGGCATTGGACAAGTGGACAAATTTGTGGAATTGGTTTAACATATCAAACTGGCTGTGGTACATCAAAATATTCATAATGATAATAGGAGGTTTAATAGGTTTAAGAATAATTTTTGCTGTGCTTGCTATAGTAAATAGAGTTAGGCAGGGATACTCACCTTTGTCATTTCAGACCCTTATCCCAAACCCAACGGAAGCCGACAGGCCCGGAGGAATCGAAGAAGGAGGTGGAGAGCAAGGCAGAACCAGATCGATTCGATTAGTGAACGGATTCCTAGCTCTTGCCTGGGACGACCTGCGGAACCTGTGCCTCTTCAGTTACCACCGATTGAGAGACTTCGTCTTGATTGCAGCGAGGACTGTGGGAACTCTGGGACTCAGGGGGTGGGAGATCCTCAAATATCTGGTGAACCTTGTATGGTATTGGGGGCAGGAACTAAAGAATAGTGCTATTAGTTTGCTTAATACCACAGCAATAGCAGTAGCTGAAGGAACAGATAGAATCATAGAAATAGCACAAAGAGCTTTTAGAGCTATTCTTCACATACCTAGAAGAATAAGACAGGGTTTAGAAAGAGCTTTGCTATAAAATGGGGAACAAATGGTCAAAAAGTTGGCCTCAGGTAAGGGAAAGAATGAGGCGAGCTCCCGCTCCAGCAGCAGATGGAGTGGGAGCAGTGTCTCAAGATTTGGCTAAGCATGGGGCAATCACAAGCAGCAATACAGCAGCTACAAATGCTGACTGTGCCTGGCTGGAAGCACAAACAGAGGAGGAGGTAGGATTTCCAGTCAAACCTCAGATACCATTAAGACCAATGACATACAAGGGAGCTGTTGATCTTAGCTTCTTTTTAAAAGAAAAGGGGGGACTGGATGGGTTAATTTACTCCAAGAAAAGACAAGAGATCCTTGATCTGTGGGTTCATAACACACAAGGTTACTTCCCTGACTGGCAAAACTACACACCAGGGCCAGGGATCAGATACCCATTGACATTTGGATGGTGCTACAAGCTAGTACCAGTTGATCCAAGCGAAGTAGAGGAAGCTAATGAAGGAGAAAACAACTGCCTGTTACACCCCATATGCCAGCATGGAATAGAGGATGAAGAAAGAGAAGTGTTACAGTGGAAGTTTGACAGCTCCCTAGCACGGAGACACATAGCCCGAGAGCTGCATCCGGAGTTTTACAAAGACTGCTGACAAAGAAGTTTCTAGCGGGGACTTTCCGCTGGGGACTTTCCAGGGGAGGAGTGGCCTGGGCGGGGTTGGGGAGTGGCTAACCCTCAGATGCTGCATATAAGCAGCTGCTTTTCGCTTGTACTGGGTCTCTCTTGTTAGACCAGATCTGAGCCTGGGAGCTCTCTGGCTAACTAGGGAACCCACTGCTTAAGCCTCAATAAAGCTTGCCTTGAGGGCGCATGCAAGCCG
>A1.KE.00.KER2009.AF457053_K.CD.97.EQTB11C.AJ249235
GCGAGAGCGTCAGTATTAAGCGGGGGAAAATTAGATGCATGGGAGAGGATTCGGCTAAGGCCAGGGGGAAAGAAAAAATATAGACTGAAACATTTAGTATGGGCAAGCAGGGAGCTGGAAAGATTTGCACTTAACCCTGGCCTTTTAGAAACAGCAGAAGGATGTCAGCAAATAATAGAACAGTTACAACCAGCTCTCAAGACAGGAACAGAAGAACTTAAATCATTATTCAATGCAGTAGCAGTCCTCTATTGTGTACATCAAAGAATAGATGTAAAAGACACCAAGGAAGCTCTAGATAAAATAGAGGAAATACAAAATAAGAGCAAGCAAAAGACACAACAGACAGCAGCTGACACAGGAAACAGCAGCAAGGTCAGCCAAAATTACCCTATAGTGCAAAATGCACAGGGGCAAATGATACACCAGACCGTGTCACCTAGGACTTTGAATGCATGGGTAAAAGTAATAGAAGAGAAGGCTTTCAGCCCAGAAGTAATACCCATGTTCTCAGCATTAGCAGAAGGAGCCACCCCTGGAGATTTAAATACGATGCTGAATATAGTGGGGGGACACCAGGCAGCCATGCAAATGTTAAAAGATACCATCAATGAGGAGGCTGCAGAATGGGACAGACAACATCCAGTACATGCTGGACCTATTCCACCAGGCCAGATGAGAGAACCAAGGGGAAGTGACATAGCAGGAACTACTAGTACCACTCAAGAGCAAATAGGATGGATGACAAGTAACCCACCTATCCCAGTGGGAGAAATCTATAAAAGATGGATAATCCTGGGATTAAATAAGATAGTAAGAATGTATAGCCCTGTTAGCATTCTGGATATAAGACAAGGGCCAAAAGAACCCTTCAAAGATTATGTAGATAGGTTCTTTAAAACTCTCAGAGCTGAGCAAGCTACGCAGGAGGTAAAAAATTGGATGACAGAAACATTACTGGTCCAAAATGCAAATCCAGATTGTAAAACCATTCTAAGAGCATTAGGACCAGGGGCTACATTAGAAGAAATGATGACAGCATGCCAGGGAGTGGGAGGACCCAGCCATAAAGCAAAGATTTTGGCTGAGGCAATGAGTCAGGCACAACATACAAACATAATGATGCAGAGAGGTAATTTTAGGGGTCAAAAAAGGATTAAGTGTTTCAACTGTGGCAAGGAAGGACACCTAGCCAGAAATTGCAGGGCCCCTAGGAAAAAGGGCTGTTGGAAATGTGGGAAGGAGGGACACCAAATGAAAGACTGCACGGAAAGACAGGCTAATTTTTTAGGGAAAATCTGGCCTTCCAGCAAGGGGAGGCCAGGAAATTTTCCACAGAAAAGACTGGAGCCAACAGCCCCACCAGCAGAGATCTATGGGATGGGGGAAGAGATAGCCTCTCCTCCGAAGCAGGAGCAGAAAGACAGGGAACAGGGTCCACCTGCAATTTCCCTCAAATCACTCTTTGGCAACGACCTATTGTCACAGTAAAAATAGGGGGACAGCTAAGAGAAGCTTTATTAGATACAGGAGCAGATGATACAGTATTAGAAGACATAGATTTGCCAGGAAAATGGAAACCAAGAATGATAGGGGGAATTGGAGGTTTCATCAAAGTAAAACAGTATGATCAGATACTTATAGAAATTTGTGGAAAAAGGGCTATAGGTACAGTATTAGTAGGACCTACACCTGTCAACATAATTGGAAGAAACATGTTGACCCAGATTGGTTGTACTTTAAATTTCCCAATTAGTCCTATTGAGACTGTACCAGTAAAATTAAAGCCAGGAATGGATGGCCCAAAGGTTAAACAATGGCCATTAACAGAAGAAAAAATAAAAGCATTAACAGAAATTTGTACAGAGATGGAAAAGGAAGGAAAAATTTCAAAAATTGGGCCTGAAAATCCATACAATACTCCAATATTTGCAATAAAGAAAAAAGATAGTACTAAATGGAGAAAATTAGTAGATTTCAGAGAGCTTAATAAAAGAACACAAGACTTTTGGGAAGTTCAATTAGGAATACCGCATCCAGCGGGCTTAAAAAAGAAAAAATCAGTAACAGTACTGGATGTGGGGGACGCATATTTCTCAGTTCCTTTAGATGAAAGCTTTAGAAAATATACTGCGTTCACCATACCTAGCACAAACAATGCGACACCAGGAATCAGATATCAGTACAATGTGCTTCCACAGGGATGGAAAGGATCACCAGCAATATTCCAGTGTAGCATGACAAAAATCTTAGAGCCCTTTAGATCAAAAAATCCAGACATAATTATCTATCAATACATGGATGACTTGTATGTAGGATCTGATTTAGAAATAGGGCAGCATAGAACAAAAATAGAAGAATTAAGAGCTCATCTATTGAGCTGGGGATTAACTACACCAGACAAAAAGCATCAGAAAGAACCCCCATTCCTTTGGATGGGATATGAGCTCCATCCTGACAAGTGGACTGTCCAGCCTATAGTGCTGCCAGAAAAAGAAAGCTGGACTGTCAATGATATACAGAAATTAGTAGGGAAACTAAATTGGGCAAGTCAAATTTATCCAGGGATTAAAGTAAAGCAATTGTGTAAACTTCTCAGGGGAGCCAAAGCACTAACAGATATAGTAACATTGACTGAGGAAGCAGAATTAGAATTGGCAGAGAACAGGGAGATCCTAAAAGACCCTGTGCATGGAGTATACTATGACCCATCAAAAGAATTAATAGCAGAAATACAAAAACAAGGGCAAGACCAATGGACATACCAAATTTATCAAGAACCATTTAAAAATCTAAAAACAGGAAAATATGCAAGAAAAAGGTCTGCTCACACTAATGATGTAAGACAATTAACAGAGGTGGTGCAAAAGGTGGTCCTGGAAAGCATAGTAATATGGGGAAAGACCCCTAAATTTAAACTGCCCATACAGAAAGAGACATGGGAAACATGGTGGATGGACTATTGGCAGGCTACCTGGATTCCTGAATGGGAGTTTGTTAATACCCCTCCTCTAGTAAAATTGTGGTACCAGTTAGAGAAAGACCCCATAGTAGGAGCAGAGACTTTCTATGTAGATGGGGCGGCCAATAAAGAGACTAAGCTAGGAAAAGCAGGGTATGTCACTGACAGGGGAAGACAAAAGGTTGTTTCCCTAACTGAGACAACAAATCAAAAGACTGAACTACATGCAATCTATCTAGCCTTGCAGGATTCAGGATCAGAAGTAAACATAGTAACAGACTCACAGTATGCATTAGGAATCATTCAGGCACAACCAGACAGGAGTGAATCAGAAATAGTCAATCAAATAATAGAGAAGCTAATAGAAAAGGACAAAATCTACCTGTCATGGGTACCGGCACACAAAGGGATTGGAGGAAATGAACAAGTAGATAAATTAGTCAGTTCCGGAATCAGAAAGGTACTGTTCTTAGATGGGATAGATAAAGCTCAAGAGGAACATGAAAGATATCACAGCAATTGGAGAACAATGGCTAGTGATTTTAATCTGCCACCTGTAGTAGCAAAGGAAATAGTAGCCAGCTGTGATAAATGTCAGCTAAAAGGGGAAGCCATGCATGGACAAGTAGACTGCAGTCCAGGGATATGGCAATTAGATTGCACACATCTAGAAGGAAAAATAATTCTGGTAGCAGTTCATGTAGCCAGTGGCTATATAGAAGCAGAAGTTATCCCAGCAGAAACAGGACAAGAGACAGCATACTTTTTACTGAAATTAGCAGGAAGATGGCCAGTAAAAGTAGTACACACAGACAATGGCAGCAATTTCACCAGCGCTGCAGTTAAAGCAGCCTGTTGGTGGGCAGGTATCCAACAGGAATTTGGAATTCCCTACAATCCCCAAAGTCAAGGAGTAGTGGAATCTATGAATAAGGAATTAAAGAAAATCATAGGACAGGTAAGAGAACAAGCTGAACACCTTAAAACAGCGGTACAAATGGCAGTATTCATTCACAATTTTAAAAGAAAAGGGGGGATTGGGGGGTACAGTGCAGGGGAAAGAATAATAGACATAATAGCAACAGACATACAAACTAAAGAACTACAAAAACAAATTACAAAAGTTCAAAATTTTCGGGTTTATTTCAGGGACAGCAGAGATCCACTTTGGAAAGGACCAGCAAAACTACTCTGGAAAGGTGAAGGGGCAGTAGTAATACAGGATAATAGTGAGATAAAAGTAGTACCAAGGAGAAAAGCAAAGATCATCAGGGACTATGGAAAACAGATGGCAGGTGATGATTGTGTGGCAGGTAGACAGGATGAGGATTAGAACATGGAACAGTCTAGTGAAACATCATATGTATGTCTCAAAGAAAGCTAAAAGGTGGTTTTATAGACATCACTATGAAAGCAATCATCCAAAAATAAGTTCAGAAGTACACATCCCACTAGGGGATGCAGAATTAGTGGTAACAACATATTGGGGTCTGCATACAGGAGAAAGGGAATGGCACTTGGGTCAGGGAGTCTCCATAGAATGGAGGCTAAAGAAGTACAGAACACAAGTAGATCCTGGCCTGGCAGACCAACTAATTCATATATATTATTTTGATTGTTTTTCAGAATCTGCTATAAGGAAAGCCCTATTAGGACATAGAGTTAGTCCTAGGTGTGAATATCAAGCAGGACATACCCAGGTAGGATCCTTACAGTATTTGGCTCTAACAGCATTAATAGCTCCAAAAAAGACAAAACCACCGGTGCCTAGTGTCCAGAAACTAGTAGAAGATAGATGGAACAAGCCCCAGAAGACCAGGGGCCACAGAGGGAGCCATACAATGAGTGGACAATAGAGATTTTAGAGGAGCTTAAGAGAGAAGCTGTTAGACATTTCCCTAGGCCATGGCTCCATGACTTGGGACAGCATATCTATAACAATTATGGGGATACTTGGGAAGGAGTTGAAGCTATAATAAGAATATTACAACAACTACTGTTTATCCATTTCAGAATTGGGTGTCACCATAGCAGAATAGGCATCTTACGACAGAGAAGAGGAGGAAATGGAGCCAGTAGATCCTAACATAGAGCCCTGGAATCAGCCAGGAAGTCAACCTAAAACTGCCTGTAACCAGTGTTATTGTAAAAAGTGTTGCTATCATTGTCAACTATGCTTTTTGCAGAAGGGCTTAGGCATTTGCTATGGCAGGGAGAAGAGGAGACAGCGAACAACAACTCCTTACGCCAGTAAGAATCATAAAGATCCTATACCAAAGCAGTAAGTAGTACCAAGTATTACATGTAATGGTACCTTTAACAGTAGGAATAATAGCATTAGTAGCAGCGCTAATACTAGCAATAATTGTGTGGACCATAGCCTATCTAGAATATAGAAAAGTGGTAAGACAAAAAAGAATAAACTGGTTATTTGATAGAATAAGAGAAAGAGCAGAAGACAGTGGCAATGAGAGCGAGGGAGATACAGAGGAATTGGCAGCACTTGGGGAAACGGGGCATCTTATTCTTGGGGATATTAATAATCTGTAGCGCTGCAAACAACTTGTGGGTCACAGTCTATTATGGGGTACCTGTGTGGAAAGAAGCAACAACCACTCTATTCTGTGCATCAGATGCTAAAGCATATGAAACAGAGGTACATAATGTCTGGGCTACACATGCCTGTGTACCCACGGACCCCAACCCACAAGAAGTAGTTTTGGAAAATGTAACAGAAAATTTTAACATGTGGAAAAATAACATGGTAGAGCAGATGCATACAGATATAATCAGTTTATGGGATGAAAGCCTAAAACCATGTGTAAAGTTAACCCCTCTCTGTGTCACTCTAACTTGTACCAATGTAACTAATAACCGTACCAATGCAAATAAGAACGATACCAATATCAATGCAACTGTGACATCAACTGACGAGATAAAAAATTGCTCTTTCAATATAACCACAGAACTAAAAGATAAGAAAAAGAGAGTGTCTGCACTTTTCTATAAGCTTGATATAGTGCAAATAAAGCAATCTGAAATTAATCAATCTGAATCTGAAGATAGGCTAATAAATTGTAATACCTCAACCGTTACACAGGCCTGTCCAAAGGTATCCTTTGAGCCAATTCCCATACATTATTGTGCTCCAGCTGGCTTTGCGATTCTAAAGTGTAATAATAACACATGCAATGGAACAGGGCCATGCACAAATGTCAGCACAGTACAATGTACACATGGAATTAAACCAGTGGTATCAACTCAATTGCTATTAAATGGCAGCCTAGCAGAAGAAGAGATAATTATTAGGTCTGAAGATATTACAAAGAATACAAAAAACATAATAGTACAGCTTAATGAAGCTGTAGAAATTAATTGTACAAGGCCAAGCAACAATACAAGAAAAAGTATACATATAGGACCAGGAAGAGCATTCTATGCAACAGGTGACATAATAGGAGATATAAGGCAGGCGCATTGTAACATTAGCGGAGGACAGTGGAATAAAACTGTAAACCAAGTAAAGAAAGAATTAGGAAAACACTTTAACAAAACAATAATATTTCAACCATCCTCAGGAGGGGACCCACAAGTCACAAGGCACATTTTTAACTGTAGAGGAGAATTTTCCTACTGTGATACTACAGACACGGTTGATGACACAGAGGAGGAAGAGGATACCACAATCACAATCCCATGTAGGATAAAACAGATAATAAACATGTGGCAGAAAGTGGGGCAAGCAATATATGCCCCTCCCACCGCAGGAAACATTACCTGTAGATCAAATATTACAGGAATGATATTGACAAGAGATGGTGGTAATGACAATAATACTAGGACTGAGGAGACCTTCAGACCTGGAGGAGGAGACATGAGAGACAATTGGAGAAGTGAACTATATAAATATAAAGTAGTACAGATTGAACCACTAGGAATAGCACCCACCAGGGCAAGGAGAAGAGTGGTGCAGAGAGAAAAGAGAGCAGTAGGAATAGGAGCGTTGTTCCTTGGGTTCTTGGGAGCAGCAGGAAGCACTATGGGCGCGGCGTCAATAACGCTGACGGTACAGGCCAGACAATTATTGTCTGGTATAGTGCAACAGCAAAACAATTTGCTGAGAGCTATAGAAGCGCAACAACAAATGTTACAGCTTACGGTCTGGGGCATTAAACAGCTCCGGGCAAGAGTCCTGGCTGTAGAGAGATACCTAAGGGATCAACAGCTCCTAGGAATTTGGGGCTGCTCTGGAAAACTTATCTGCACCACTAATGTGCCCTGGAACTCTAGCTGGAGTAATAAATCTCAGAGTGAGATTTGGGAGAACATGACCTGGATGCAGTGGGAAAAGGAGATTAGTAATCATACAAGCACAATATATAGGTTAATTGAAGAGTCGCAAATCCAACAGGAAAAGAATGAACAAGACTTATTGGCATTGGACAAGTGGGCAAGTCTGTGGAATTGGTTTGACATATCAAACTGGCTATGGTATATAAAAATATTCATAATGATAGTAGGAGGCTTGATAGGTTTAAGAATAGTTTTTACTGTGCTTTCTGTAGTAAATAGAGTCAGGCAGGGATACTCACCTTTGTCATTCCAGACCCTTACCCCAAGCCCGAGGGGACCCGACAGGCCCGAAGGAATCGAAGAAGGAGGTGGAGAGCAAGACAAAGACAGATCCGTGAGATTAGTCAGCGGGTTCTTAGCTCTTGCCTGGGACGATCTACGGAACCTGTGCCTCTTCAGCTACCGCCACTTGAGAGACTTAGTCTTAATTGCGACGAGGATTCTGGACAGGGGACTGAAGGGGAGTTGGGAAGCCCTCAAATACCTGTGGAACCTGATACTGTATTGGGGTCAGGAGATAAAGAATAGTGCCATTAACTTGCTTAATACTACAGCAATAGCAGTAGCTGAAGGAACAGATAGAATCATAGAGATAGTATACAGAGCTTTTAGAGCTTTACTTCACATACCTAGAAGAATAAGACAGGGCTTTGAAAGACTTTTACTATAAAATGGGTGGCAAGTGGTCAAAAAGTAGTATAGTTGGATGGTCTACTGTAAGGGAAAGAATGAGAAAAACACCTCCAGCAGCAGATGGGGTGGGAGCAGTATCTCAAGACCTGGATAAACATGGGGCAGTCACAAGCAGCAATACTGCATTCAATAATCCTGATTGTGCCTGGCTGGAAGCACAGGAAGACGAGGACGTGGGTTTTCCAGTCAGACCTCAGGTACCATTAAGACCAATGACTTTTAAGGGAGCTTTTGATCTGGGCTTCTTTTTAAAAGAAAAGGGGGGACTGGATGGGCTAATTTACTCCAAGAGAAGACAAGAGATCCTTGATCTGTGGGTTTATCATACACAAGGCTTCTTCCCTGATTGGCAAAACTACACACCAGGGCCAGGGATCAGATACCCACTGACCTTTGGATGGTGCTACAAGCTAGTACCAGTTGATCCAAGAGAAGTAGAAGAGGCCACTGAAGGAGAGAACAACTGCCTGTTACACCCTGTAAACCAGCATGGAATGGAGGATGAACACAGAGAAGTATTAAAGTGGAAGTTTGACAGTTCCCTGGCACGAAAACATGTAGCCCGAGAGATGCATCCGGAGTACTACAAAGACTGCTGA
>A1.UA.01.01UAPol294.DQ823356_K.CM.96.MP535.AJ249239
GCGAGAGCGTCAGTATTAAGCGGGGGAAAATTAGATGCATGGGAAAAAATTCGGTTAAGGCCAGGGGGAAAGAAAAAATATAGAATAAAACACCTAGTATGGGCAAGCAGGGAGCTGGAAAGATTCGCGCTTAACCCTAGCCTTTTAGAAACCTCAGAAGGATGTCAACAAATACTGGAACAATTACAACCAACTCTCAAGACAGGATCAGAAGAACTCAAATCATTATATAATACAGTAGCAACCCTCTATTGTGTACATCAACGGATAGAGATAAAAGACACCAAGGAAGCTTTAGATAAAATAGAGGAAATACAAAATAAGAGCAAGCAAAAGACCCAACAAGCAGCAACTGGCACAGGAAACAGCAGCAAGGTCAGTCAAAATTACCCCATAGTGCAAAATGCACAAGGGCAAATGACACACCAGTCCATGTCACCTAGGACTTTGAATGCATGGGTGAAAGTAATAGAAGAAAAGGCTTTCAGCCCAGAAGTAATACCCATGTTTTCAGCATTGTCAGAAGGAGCCACCCCACAAGATTTAAACATGATGCTGAACATAGTGGGGGGACACCAGGCAGCTATGCAAATGTTGAAAGATACCATCAATGAGGAAGCTGCTGAATGGGATAGGTTACATCCAGCACAGGCAGGGCCTTTTCCACCAGGGCAGATGAGAGAACCAAGGGGAAGTGACATAGCAGGAACTACTAGTACCCTTCAAGAACAAATAGGATGGATGACAAGCAACCCACCTATCCCAGTGGGAGACATCTATAAAAGATGGATAATCCTAGGATTAAATAAGATAGTAAGAATGTATAGCCCTGTTAGCATTTTAGATATAAGACAAGGGCCAAAAGAACCCTTCAGAGACTATGTAGATAGGTTCTTTAAAACTCTTAGAGCTGAGCAAGCTACACAGGATGTCAAGAACTGGATGACAGAAACCCTGCTGGTCCAAAATGCAAATCCAGATTGTAAAACCATTTTAAGAGCATTAGGATCAGGGGCTACATTAGAAGAAATGATGACAGCATGCCAAGGAGTGGGAGGACCCGGCCATAAAGCAAGGGTTTTGGCCGAGGCAATGAGTCAAGTACAAAATGCAAACATAATGATGCAGAAAAGTAATTTTAGGGGCCCAAAAAGAATTAAGTGTTTCAACTGTGGCAAAGAAGGACACCTAGCCAGAAATTGCAGGGCCCCTAGGAAAAAGGGCTGTTGGAAATGTGGAAAGGAAGGCCATCAAATGAAAGACTGCACTGAGAGACAGGCTAATTTTTTAGGGAAAATTTGGCCTTCCAGCAAAGGGAGGCCAGGAAATTTTCCTCAGAGCAGACCAGAGCCATCAGCCCCACCAGCAGAAAACTTTGGGATGGGGGAAGAGAGAGCCCCCTCCCTGAAACAGGAACAGAAAGACAGGGACCAGCATCCTCCTTCAATTTCCTTCAAATCACTCTTTGGCAACGACCCCTTGTCACAATAAGAATAGGAGGACAGCTAAAAGAAGCTCTATTAGATACAGGAGCAGATGATACAGTACTAGAAGACATAAATTTGCCAGGAAAATGGAAACCAAAAATGATAGGGGGAATTGGAGGTTTTATCAAGGTAAGACAGTATGATCAGATACTTATAGAAATTTGTGGGAAAAAGGCTATAGGTACGGTATTAGTAGGGCCTACCCCTGTCAACATAATTGGAAGAAATATGTTGACTCAGCTTGGTTGTACTTTAAATTTTCCAATAAGTCCTATTGAAACTGTACCAGTAACATTAAAGCCAGGAATGGATGGCCCAAAGGTTAAACAATGGCCATTGACAGGAGAGAAAATAAAAGCATTAACAGACATTTGTAAGGAGATGGAAAAGGAAGGAAAAATTTCAAAAATTGGGCCTGAAAATCCATACAATACTCCAGTATTTGCTATAAAGAAAAAGGACAGCACTAAGTGGAGGAAATTAGTAGATTTCAGGGAGCTCAATAAAAGAACTCAGGACTTTTGGGAAGTTCAATTAGGAATACCCCATCCAGCGGGTTTAAAAAAGAAAAAATCAGTAACAGTACTAGATGTGGGAGATGCATATTTTTCAGTTCCTTTAGATGAAAGCTTCAGAAAGTATACTGCATTCACTATACCAAGTATAAACAATGAGACACCAGGGATCAGATATCAGTACAATGTACTTCCACAGGGATGGAAAGGATCACCAGCAATATTCCAGAGTAGCATGACAAAAATCTTAGAGCCCTTTAGATTAAAAAATCCAGAAATAGTTATCTATCAATACATGGATGACTTGTATGTAGGCTCTGATTTAGAAATAGGGCAACATAGAACAAAAATAGAGGAGTTAAGAGATCATCTATTGAGCTGGGGATTTACTACACCAGACAAAAAGCATCAGAAAGAACCCCCATTTCTTTGGATGGGATATGAACTCCATCCTGACAAATGGACAGTCCAGCCTATAATGCTGCCAGATAAAGACAGCTGGACTGTCAATGATATACAGAAATTAGTGGGAAAACTAAATTGGGCAAGTCAGATTTATCCAGGGATTAAAGTAAGGCAATTGTGTAAACTCCTCAGGGGAACCAAAGCACTGACAGATATAGTGACACTGACTGAGGAAGCAGAATTAGAATTAGCAGAGAACAGAGAGATTCTAAAAGAACCTGTGCATGGAGTATATTATGACCCATCAAAAGATTTAGTAGCAGAAATACAGAAACAAGGACAAGACCAGTGGACATATCAAATTTATCAGGAGCCATTTAAGAACCTAAAAACAGGAAAATATGCAAAAAAGGGGTCTGCTCACACGAATGATGTAAAACAATTAACAGCAGTGGTGCAAAAAGTGACCACAGAAAGCATAATAATATGGGGAAAGACTCCTAAATTTAGACTACCCATACAAAAAGAAACATGGGAAGCATGGTGGATGGAGTACTGGCAGGCTACCTGGATTCCTGAATGGGAGTTTGTCAATACCCCTCCTCTAGTAAAACTATGGTACCAGTTGGAAAAAGAACCCATAGTAGGAGCAGAGACTTTCTATGTAGATGGGGCAGCTAACAGGGAGACTAAGATAGGGAAAGCAGGGTATGTTACTGACAGAGGAAGACAAAAGGTTGTTCCTCTAACTGAGACAACAAATCAAAAGACTGAATTACATGCAATCCATCTAGCTTTGCAGGATTCAGGATCAGAAGTAAATATAGTAACAGACTCACAATATGCATTAGGAATTATTCAGGCACAACCAGACAGGAGTGAATCAGAGATAGTCAATAAAATAATAGAGAAACTAATAGAAAAAGAAAGAGTCTACCTGTCATGGGTACCAGCGCACAAGGGGATTGGAGGAAATGAACAAGTAGATAAATTAGTCAGTTATGGAATCAGGAGGGTGTTATTTTTAGAAGGGATAGATAAGGCTCAAGAAGAACATGAAAAATATCACAGCAATTGGAAAGCAATGGCTAGTGATTTTAATCTGCCACCTATAGTAGCAAAGGAAATAGTAGCCAGCTGTGATAAATGTCAACTAAAAGGGGAAGCTATGCATGGCCAGGTAGACTGTAGCCCAGGGATATGGCAATTAGATTGCACACATCTAGAAGGAAAAGTAATCATAGTAGCAGTCCATGTAGCCAGTGGCTATATAGAAGCAGAAGTTATCCCAGCAGAAACAGGACAGGAGACAGCATACTTTCTGCTGAAATTAGCAGGAAGATGGCCAGTAAAAGTAGTACACACAGATAATGGCCCCAATTTCACCAGCAGTGCAGTTAAGGCTGCCTGTTGGTGGGCAAATATCCAACAGGAATTTGGGATTCCCTACAATCCCCAAAGTCAAGGAGTAGTGGAGTCTATGAATAAGGAATTAAAGAAAATCATAGGGCAGGTAAGAGAGCAAGCTGAACACCTTAAGACAGCAGTACAAATGGCAGTATTCATTCACAATTTTAAAAGAAAAGGGGGGATTGGGGGGTACAGTGCAGGGGAAAGAATAATAGACATAATAGCAACAGACATACAAACTAAAGAATTACAAAAACAAATTATAAAAATTCAAAATTTTCGGGTTTATTACAGAGACAGCAGAGATCCAATTTGGAAAGGACCAGCAAAACTACTCTGGAAAGGTGAAGGGGCAGTGGTAATACAGGACAATAACGATATAAAAGTAGTACCAAGAAGAAAAGCAAAGATCATTAGGGATTATGGAAAACAGATGGCAGGTGATGATTGTGTGGCAAGTAGACAGGATGAGGATTAAAACATGGAACAGTTTAGTAAAACATCATATGTATGTCTCAAAGAAAGCTAGAGAGTGGGTTTATAGACATCACTATGAAAGCAGGCATCCAAGAGTAAGTTCAGAAGTACACATCCCACTAGGGGATGCTAGGCTAGTAGTAAAAACATATTGGGGTCTGCATGCAGGAGAAAAAGACTGGCAATTGGGTCATGGGGTCTCCATAGAATGGAGACAGGAAAGGTATAGCACACAAATAGACCCTGACCTGGCGGACCAACTAATTCATCTGTATTATTTTGACTGTTTTTCAGAATCTGCCATAAGGAAAGCCATAGTAGGAAACATAGTTAGCCCTAGGTGTAACTATCCAGCAGGACACAACAAGGTAGGATCTCTACAATACTTGGCACTGAAAGCATTAGTAACACCAACAAGGGAAAGGCCACCTTTGCCTAGTGTTAGGAAACTAACAGAGGATAGATGGAACAAGCCCCAGAAGACCAGGGGCCGCAGAGGGAACCATACAATGAATGGATGTTAGAACTGTTAGAAGATCTTAAGCATGAAGCTGTCAGACATTTTCCAAGGCCGTGGCTCCATGGATTAGGACAACATATCTATAACACCTATGGGGATACTTGGGAAGGGGTTGAAGCTATAATAAGAATTTTGCAACAACTACTGTTTGTTCATTTCAGAATTGGGTGCCAACATAGCAGAATAGGCATTATGCAAAGGAGAAGAGTCAGGAATGGATCCAGTAGATCCTAACCTAGAGCCCTGGAATCATCCGGGAAGTCAGCCTAGAACTGCTTGTAACAATTGTTACTGTAAAAGGTGTTGCTGGCATTGCCAAATTTGCTTTCTGAAAAAAGGCTTAGGCATCTCCTATGGCAGGAAGAAGCGGAGACACAGACGAACAACTCCTTACAACAGTGAGAACCATCAAGATCCTCTACGAAAGCAGTGAGTAGTGCTAAGTAGTACATGTAATGGTGTCCTTAGCAATTTCAATAGTAGCATTAGTAGTAGCACTAATATTAGCAATAATTGTATGGACCATAGTATATATAGAATATAGGAAATTGGTAAAACAAAAAAGAATAAACTGGTTAATAGATAGAATAAGAGAAAGAGCAGAAGACAGTGGCAATGAGAGTGAGGGGGATGCAGAGGAATTGGCAGACATTGGGGAACTGGGGCATCTTATTCTTGGGAATATTGATAATCTGTAGCAATGCAGACAAATTGTGGGTCACAGTCTATTATGGGGTACCTGTGTGGAAAGAAGCAACACCCACTCTATTCTGTGCATCAGATGCTAAAGCATATGAGAAGGAGGTACATAATGTCTGGGCTACCCATGCCTGTGTACCCACGGACCCCAACCCACAAGAAGTAGAGATGGAAAATGTAACAGAAAACTTTAACATGTGGAAAAATAACATGGTAGAGCAGATGCATACAGATATAATCAGTTTATGGGATGAAAGCCTAAAACCTTGTGTAGAGTTAACCCCTCTCTGTGTCACTTTAAATTGTACTGATTACAAAGGAACCAATAGCACCAATAATGCAACTAGCACTGTGGTAAGCCCAGCAGAAATAAAAAATTGCTCTTTCAATATAACCACAGAAATAAAAGATAAGAAGAAAAAGGAATCTGCACTTTTCTATAGACTTGATGTACTGCCACTTAATGGCGAGGGTAATAACAGTAGTACTGAATACAGGCTAATAAATTGTAATACCTCAACCATTACACAGACTTGTCCAAAAGTAACCTTTGAGCCAATTCCCATACATTATTGTGCCCCAGCTGGCTTTGCGATTCTAAAGTGTAAGGATAAAAGGTTCAATGGGACAGGACCATGTAAAAATGTCAGCACAGTACAATGTACACATGGAATTAAACCAGTGGTATCAACTCAACTGCTGTTAAATGGCAGCCTAGCAGAAGAAGAGATAATAATTAGGTCTGAAAATATTACAGATAATACAAAAAACATAATAGTACAGCTTAATGAAACTGTACAAATTAATTGTACAAGGCCAAACAACAATACAAGAAAAAGTATACATATGGGACCAGGAAAAGCATTCTATACAACAGGTGATATAATAGGAGATATAAGACAGGCACATTGCAACATTAGTGGAGAAAAATGGAACATGACTTTAAGCAGAGTAAAGGAAAAGCTAAAAGAACATTTTAAGAATGGAACAATAACATTTAAACCACCAAACCCAGGAGGAGACCCAGAAATTCTAACGCACATGTTTAATTGTGCAGGAGAATTTTTCTACTGCAATACAACAAAACTGTTTAATGAGACAGGGGAGAATGGTACTATCACACTCCCATGTAGAATAAAGCAGATTATAAACATGTGGCAGAAAGTGGGAAAAGCAATATATGCCCCTCCCATTGCAGGAAGTATTAACTGTAGCTCAAATATTACAGGAATGATATTGACAAGAGATGGTGGTAATAATACTCATAATGAGACCTTCAGACCTGGAGGAGGAGACATGAGGGACAATTGGAGAAGTGAACTGTATAAATATAAAGTAGTACAGATTGAACCACTAGGAATAGCACCCACCAGGGCCAGGAGAAGAGTGGTGCAGAGAGAAAAAAGAGCAGTAGGATTAGGAGCTGTGTTCTTTGGATTCTTGGGAGCAGCAGGAAGCACTATGGGCGCGGCGTCAATAACGCTGACGGTACAGGCCAGACAATTATTGTCTGGTATAGTGCAACAGCAAAGCAATTTGCTGAGAGCTATAGAAGCGCAACAACATCTGTTACAGCTCACGGTCTGGGGCATTAAACAGCTCCGGGCAAGAATCCTGGCTGTAGAAAGATACCTAAAGGATCAACAGCTCCTAGGGATTTGGGGCTGCTCTGGAAAACTCATCTGCACCACTAATGTGCCCTGGAACTCTAGCTGGAGTAATAAATCTTGGGAAGAGATTTGGAACAACATGACCTGGATGGAGTGGGAAAAAGAGATTGGCAATTACTCAGACACAATATATAAGTTAATTGAAGAATCACAAACCCAGCAGGAAAAGAATGAACAAGATTTATTGGCATTGGACAAATGGGCAAGTCTGTGGAATTGGTTTGACATAACAAAATGGCTATGGTATATAAAAATATTCATAATGATAATAGGAGGCTTGATAGGTTTAAGAATAGCTTTTGCTGTGCTTTCTGTAGTAAATAGAGTCAGGCAGGGATACTCACCTTTGTCATTTCAGACCCTTATCCCAACCTCGAGGGGAGCAGACAGACCCGAAGGAATCGAAGAAGAAGGTGGAGAGCAAGACAAAAACAGATCAGTTCGATTAGTGAGCGGCTTCTTAGCGCTTGCCTGGGACGATCTGCGGAACCTGTGCCTCTTCAGCTACCGCCAATTGAGAAACTTAATCTTAATTGTGACGAGGATCCTGGAAAGGGGACTGAGGGGGGGTTGGGAAGCCCTCAAATATCTGTGGAACCTTGTACAGTATTGGAGTCAGGAACTAAAGAATAGTGCCATTAGCTTGCTTAATACCACAGCAATAGCAGTAGCTGGAGGAACAGATAGAATTATAGAAATAGGACAAAGAGCTTTTAGAGCTTTACTTCACATACCTAGAAGAATAAGACAGGGTCTCGAAAGAGCTTTACTATAAAATGGGTGGCAAGTGGTCAAAAAGTAGTATAGTTGGATGGCCTGCTATAAGGGAAAGAATGAGACGAGCACGACCAGCAGCAGACAGGGTGGGAACACAACCAGCAGCAGACGGGGTGGGAGCAGTATCTCAAGACCTGGCTAGACATGGGGCAGTCACAAGCAGCAATACTTCACACAATAATCCTGATTGTGCCTGGCTGGAAGCACAGGAGGAAGAGGAAGTAGGTTTTCCAGTCAGACCTCAGGTACCATTAAGACCAATGACTTATAAGGCAGCTTTTGATCTCGGCTTCTTTTTAAAAGAAAAGGGGGGACTGGATGGGCTAATTTACTCCAAGAAAAGACAAGAAATCCTTGATCTGTGGGTTTATCACACACAAGGTTTCTTCCCTGATTGGCAAAACTACACACCAGGGCCAGGGATCAGATACCCACTGACCTTTGGGTGGTGCTACAAGCTAGTACCAGTTGATCCAGCAGAAGTAGAAGAGACCACAGAAGGAGAGGACAACTGCCTGTTACACCCCATAAACCAGCATGGAATGGAGGATGAACACAGAGAAATATTAATGTGGAAGTTTGACAGTTCCCTAGCACGAAGACACGTAGCCCGAGAGCTGCATCCGGACTACTACAAAGACTGCTGA
>A2.CY.94.94CY017_41.AF286237_B.BR.03.BREPM1028.EF637053
TTGAAAAGCGAAAGTAACAGGGACTCGAAAGCGAAAGTTCCAGAGGAGTTCTCTCGACGCAGGACTCGGCTTGCTGAGGTGCACACGGCAAGAGGCGAGGGGCGGCGACTGGTGAGTACGCCTAATATTTTTGACTAGCAGAGGCTAGAAGGAGAGAGATGGGTGCGAGAGCGTCAATATTAAGCGGGGGAAAATTAGATGCTTGGGAGAAAATTCGGTTAAGGCCAGGGGGAAAGAAAAAATATAGACTGAAACATTTGGTATGGGCAAGCAGGGAGCTGGAGAAATTCTCAATTAACCCTGGCCTTTTAGAAACACCAGAGGGATGTAGACAAATAATAAGGCAGTTACAACCAGCTCTCCAAACAGGAACAGAAGAACTTAAATCATTATATAATACAGTAGTAGTCCTCTACTGGGTACATCAAAGGGTAGATGTAAAAGACACCAAGGAAGCTCTAGATAAAATAGAGGAAGAACAAAACAAGCAGAAAACACAGCATGCAGCAGCTGACACAGGGAACAGCAGCAGTCAAAATTATCCCATAGTGCAAAATGCACAAGGGCAAATGGTACACCAGGCTATATCACCTAGGACGTTGAATGCCTGGGTCAAAGTAGTAGAAGAAAAGGCTTTCAGCCCAGAAGTAATACCTATGTTTACAGCATTATCAGAAGGAGCCACCCCACAAGACTTAAATACTATGCTAAACACAGTGGGGGGACATCAAGCAGCTATGCAAATGTTAAAAGATACCATCAATGAGGAAGCTGCAGAATGGGACAGGGTACATCCAGTACATGCAGGGCCTATTCCACCAGGCCAGATGAGAGAACCAAGGGGAAGTGACATAGCAGGAACTACTAGTACCCTTCAGGAACAAATAGGTTGGATGACCAGCGATCCACCCATCCCAGTGGGAGAAATTTATAAAAGATGGATAATCCTGGGATTAAATAAAATAGTAAGAATGTATAGCCCTGTCAGCATTTTGGACATAAGACAAGGGCCAAAAGAACCCTTTAGAGATTATGTGGATAGGTTCTTTAAAACTCTAAGAGCTGAGCAAGCCACACAGGAGGTAAAAAACTGGATGACGGACACCTTGCTGGTCCAAAATGCGAACCCAGATTGTAGATCCATCTTGAGAGCATTAGGACCAGGGGCCTCATTAGAAGAAATGATGACAGCATGTCAGGGAGTGGGAGGACCCAGCCATAAAGCAAGGGTTTTGGCTGAAGCAATGAGCCATGTACAAAGTACAAATACAAACATAATGATGCAGAGAGGCAATTTTAGGGGTCAAAAAAGAATTAAGTGTTTCAACTGTGGCAAGGAAGGACACCTAGCCAGAAATTGCAGGGCCCCTAGGAAAAAGGGCTGCTGGAAATGTGGAAAGGAAGGACATCAAATGAAAGATTGCACTGAGAGACAGGCTAATTTTTTAGGGAAAATTTGGCCTTCCAACAAAGGGAGGCCAGGAAATTTTCCTCAGAGCAGAACAGAGCCAACAGCCCCACCAGCAGAGAACTTGAGAATGGGGGAAGAGATAACCTCCTCCCTGAAGCAGGAACTGGAGACCAGGGAACCATACAATCCTGCAATTTCCCTCAAATCACTCTTTGGCAACGACCCCTTGTTACAGTAAAGATAGAGGGACAGCTAAAAGAAGCTCTATTAGATACAGGAGCAGATGATACAGTGTTAGAAGAAATAAATTTGCCAGGAAAATGGAAACCAAAAATGATAGGGGGAATTGGAGGTTTTATCAAAGTAAGACAATATGATCAGATAGCTATAGAAATTTGTGGAAAAAGGGCCATAGGTACAGTATTAGTAGGACCTACCCCTGTCAACATAATCGGAAGAAATATGTTGGTTCAGCTTGGTTGTACTTTAAATTTTCCAATTAGTCCTATTGAAACTGTACCAGTAAAATTAAAGCCAGGAATGGATGGTCCAAAGGTTAAACAATGGCCATTGACAGAAGAAAAAATAAAAGCATTAACAGAAATCTGTAAAGAAATGGAAAAGGAAGGAAAAATTTCAAAAATTGGGCCTGAAAATCCATACAACACTCCAGTGTTTGCTATAAAGAAAAAAGACAGCACTAAATGGAGAAAATTAGTAGATTTTAGAGAACTCAATAAGAGAACTCAAGACTTCTGGGAAGTTCAGTTAGGAATACCACATCCAGCAGGATTAAAAAAGAAAAAAGCAGTAACAGTACTTGATGTGGGGGACGCATATTTTTCCGTTCCCTTACATGAAGACTTCAGAAAATATACTGCATTCACCATACCTAGTACCAACAATGAGACACCAGGAGTTAGGTATCAGTACAATGTACTTCCACAGGGATGGAAAGGATCACCAGCAATATTCCAGAGTAGCATGACAAAGATCTTAGAGCCCTTTAGATCAAAGAATACAGAATTAATCATCTACCAATACATGGATGACTTGTATGTAGGATCTGATTTAGAAATAAGCCAGCATAGAGTAAAAATAGAGGAATTAAGGGCTCACTTATTGAAATGGGGATTTTATACACCAGACAAAAAACATCAGAAAGAACCTCCATTTCTTTGGATGGGATATGAGCTTCATCCTGACAAATGGACAGTCCAGCCTATAAAGCTGCCAGAAAAAGACAGCTGGACTGTCAATGATATACAGAAATTAGTAGGGAAATTAAATTGGGCAAGTCAGATTTATGCAGGGATTAAAGTAAAGCAACTGTGTAAACTCCTTAGAGGAGCCAAAGCACTAACAGACATAGTAACACTGACTAAAGAAGCAGAGTTAGAATTAGAAGAGAACAGGGAAATTTTAAAAACCCCTGTACATGGGGTATACTATGACCCATCAAAAGACTTAATAGCAGAAATACAGAAACAAGGGCAAGACCAATGGACATATCAAATTTATCAGGAACCCTTTAAGAATCTGAAAACAGGGAAATATGCAAAAAGGAGGTCCACCCACACTAATGATATAAAACAGTTAACAGAAGCAGTACAAAAAATAACCATGGAAAGCATAGTGATATGGGGAAAGACTCCTAAATTTAAATTACCCATACAAAAGGAAACATGGGAGACATGGTGGGCGGAGTATTGGCAGGCTACCTGGATTCCTGAGTGGGAGTTTGTCAATACCCCTCCTCTAGTAAAACTGTGGTACCAGTTAGAAAAAGAACCCATAGCAGGAGCAGAAACTTTCTATGTAGATGGGGCAGCTAATAGAGAGACTAAACTAGGAAAGGCAGGGTATGTCACTGACAGAGGAAGACAAAAAATTGTCTCCCTGACGGAGACAACAAATCAAAAGACTGAATTACATGCAATCTATTTGGCTTTACAGGATTCAGGATTAGAAGTGAACATAGTGACAGATTCACAGTATGCATTAGGAATCATTCAAGCACAACCAGAAAGGAGTGAATCAGAGATAGTCAATCAAATAATAGAAAAATTAATAGAAAAGGAAAGGGTCTACCTATCATGGGTACCAGCACACAAAGGGATTGGAGGAAATGAACAAGTAGACAAATTAGTCAGTTCTGGAATCAGGAAAGTGCTATTTTTAGATGGGATAGATAAGGCTCAAGAGGAACATGAAAGATATCACAGCAATTGGAGAGCAATGGCTCATGACTTTAATCTACCACCTGTAGTAGCAAAAGAAATAGTAGCTAGCTGTGATAAATGTCAGCTAAAAGGGGAAGCCATGCATGGACAAGTAGACTGTAGTCCAGGAATATGGCAACTAGATTGCACACATCTTGAAGGAAAAGTTATCCTGGTGGCAGTCCATGTGGCCAGTGGCTATATAGAAGCAGAAGTCATCCCAACAGAAACAGGACAGGAAACAGCATACTTTCTATTAAAATTAGCAGGGAGATGGCCAGTAAAAACAATACATACAGACAATGGCAGCAATTTCACTAGTACTACAGTTAAGGCCGCCTGTTGGTGGGCGGGGATCAAGCAGGAATTTGGCATTCCCTACAATCCCCAAAGTCAAGGAGTAGTAGAATCTATGAATAAGGAATTAAAGAAAATTATAGGACAGGTAAGAGATCAAGCTGAGCATCTTAGGACAGCAGTACAAATGGCAGTACTCATCCACAATTTTAAAAGAAGAGGGGGGATTGGGGGGTACAGTGCAGGGGAAAGAATAATAGACATAATAGCAACAGACATACAAACTAAAGAATTACAAAAACAAATTACAAAAATTCAAAATTTTCGGGTTTATTACAGGGACAGCAGAGATCCACTTTGGAAAGGACCAGCAAAGCTTCTCTGGAAAGGTGAAGGGGCAGTAGTAATACAAGATAATAGTGACATAAAAGTAGTGCCAAGAAGAAAAGTAAAGATCATTAGGGATTATGGAAAACAGATGGCAGGTGATGATTGTGTGGCAAGTAGACAGGATGAGGATTAGAACATGGAACAGTCTAGTAAAATACCATATGTATGCTTCAGGGAGAGCTAGGGGATGGTTTTATAGACATCACTATGAAAGTAATCACCCGAAAATAAGTTCAGAAGTACACATCCCACTAGGGGATGCGACACTGGTAGTAACAACATATTGGGGTCTACATACAGGAGAAAGAGATTGGCATTTGGGTCAGGGAGTCTCCATAGAATGGAGGAAGAAGAGATATAGCACTCAAGTAGACCCTGACCTAGCAGACCAACTAATTCATCTGTATTATTTTGATTGTTTTTCAGAATCTGCTATAAGAAATGCCATATTAGGATGTGTAGTTAGACCTAGGTGTGATTATCAAGCAGGACATAACAAGGTAGGATCTTTACAGTACTTGGCACTAACAGCATTAGTAAAACCAAAAAGGATAAAGCCGCCTTTGCCTAGTGTTAAGAAACTGACAGAGGACAGATGGAACAAGCCCCAGAAGACCAAGGGCCCCAGAGGGAGCCATACAATGAATGGACACTAGAGCTTTTAGAAGAACTTAAGAATGAGGCTGTTAGACATTTTCCTAGGCCGTGGCTTCATAGCTTAGGGCAACATATCTATGAAACTTATGGGGATACTTGGGCAGGAGTGGAAGCCTTAATAAGAATTCTGCAACAACTGCTGTTCATTCATTTCAGAATTGGATGCCGACATAGCAGAATAGGCATTATGCGACAGAGGAGAGCAAGGAATGGAGCCAGTAGATCCTAACCTAGAGCCCTGGAAGCATCCAGGAAGTCAGCCTAGGACTGCTTGTACCCCTTGCTATTGTAAAAAGTGTTGCTATCATTGCCAAAGTTGCTTCTTAACAAAAGGCTTAGGCATCTCCTATGGCAGGAAGAAGCGGAGACAGCGACGAGGAACTCCTCAAGACAGTCAGAGTCATCAAGTTTCTCTATCAAAGCAGTAAGTAGTACATGTAATGCAATCTTTACAGATAGTAGCAATAGTAGCATTAGTAGTAGCATCATTAATAGCAATAGTAGTGTGGTCCATAGTATTAATAGAATATAGGAGAATATTAAGACAAAGAAAGATAGACAGGTTAATTGATAAAATAAGAAAAAGAGAAGAAGACAGTGGTAACGAGAGTGATGGAGATCAAGAAGAATTATCAGCACTTCTGGGGCACCATGCTCCTGGGGATATTAATAATCTGTAGTGTTGCAGGACAATTGTGGGTCACAGTCTATTATGGGGTACCTGTATGGAAAGATGCAACCACCACTCTATTTTGTGCATCAGATGCTAAAGCAGTGGACACAGAGGCACATAATGTTTGGGCCACACATGCCTGTGTACCCACAGACCCCAACCCACAAGAAGTAGTATTAGAGAATGTGACAGAAAATTTTAACATGTGGAAAAACAACATGGTAGAACAAATGCATGAGGATATAATTAGTTTATGGGATCAAAGCCTAAAACCATGTGTAAAATTAACCCCACTCTGTGTTACTTTAAAATGCACTAATTTGACATTGAGTAATGCTACTGAGGGAATAAATAACAATAGTAGTATTGCTAGTGAGGAAATGAAGAACTGCTCTTTCAACGTCACCACAAGCATAAGAAATAAGATGACGAAAGAATATGCGCTTTTCTATAAACTTGATATAGTACCAATAGATGAAAAGGATAATACAAGCTATATACTGATAAATTGTAACACCTCAGTCATCACACAAGCCTGTCCAAAGGTATCCTTTGAACCAATTCCCATACATTATTGTGCCCCGGCTGGTTTTGCGCTTTTAAAATGTAATGATAAGAAATTCAATGGAACAGGACCATGTACAAATGTCAGCACAGTACAATGTACACATGGAATTAGGCCAGTAGTGTCAACTCAACTACTGTTAAATGGCAGCCTAGCAGAAGAAGAGATAGTAATTAGATCTGAAAATCTCACGAACAATGCTAAAACCATAATAGTACAGCTGAATGAAACTGTAGAGATTAATTGTACAAGATACAACAACAATACAAGTAAAGGTATACATATGGGACCGGGGAGAGCATTCTATGCAACAGGAGAAATAATAGAAGATATAAGGAAAGCACATTGTAACCTTAGTCAAACAAAATGGAATAACACTTTAAAACAGATAGTTACAAAATTAGGAGAACAATTTGAAAATAAAACAAAAATAAGCTTTAATCACTCCTCAGGAGGGGACCTAGAAATTGTAATGCTCAGTTTTAATTGTGGAGGAGAATTTTTCTACTGTAATACAACGCAGCTGTTTAATAGTACTTGGCACAAGAATACAACTCAGAACAGTACTTGGCACAAGAATGAAACTACTTGGCAAATGAATGGAAATACTGGAGAGAGGACTAATGATACTATCACACTCCCATGCAGAATAAAACAAATTATAAACAGGTGGCAGGAAGTAGGAAAAGCAATGTATGCCCCTCCCATCAGAGGACTAATTAGATGTTCATCAAATATCACAGGGCTGCTATTAACAAGAGATGGTGGTGGGGACAACGGGTCTGAGTCTGAGACCTTCAGACCTGGAGGAGGAAATATGAGGGATAATTGGAGAAGTGAATTATATAAATATAAAGTAGTAAGAATTGAGCCATTAGGAGTAGCACCCACCAAGGCAAAGAGAAGAGTGGTGCAGAGAGAAAAAAGAGCAGTGGGAACAATAGGAGCTATGTTCCTTGGGTTCTTGGGAGCAGCAGGAAGCACTATGGGCGCAGCGTCACTGACGCTGACGGTACAGGCCAGACAATTATTGTCTGGTATAGTGCAACAGCAAAACAATTTGCTGAGAGCTATTGAGGCGCAACAACATCTGTTGCAACTCACAGTCTGGGGCATCAAGCAGCTCCAGGCAAGAGTCCTAGCTGTAGAAAGGTACCTAAAGGATCAACAGCTCCTAGGGATTTGGGGTTGCTCTGGAAAACTCATCTGCACCACTGCTGTGCCTTGGAATGCTAGTTGGAGTAATAAAACTCTAAATGAAATTTGGGATAACATGACCTGGATGCAGTGGGACAAAGAAATTGACAATTACACACAATTAATCTATACCTTAATTGAAGAAGCGCAAAACCAGCAAGAAAAGAATGAACAAGAATTATTGGAATTAGATAAATGGGCAAGTTTATGGAATTGGTTTAACATAACACAATGGCTGTGGTATGTAAAAATATTCATAATGATAGTAGGAGGCTTGGTAGGTTTAAGAATAGTTTTTGCTGTACTTTCTATAGTGAATAGAGTTAGGCAGGGATACTCACCATTGTCATTCCAGACCCACCTCCCAGCCCAGAGGGGACCCGACAGGCCCGGAGGAATCGAAGAAGAAGGTGGAGAGAGAGACAACGACAGATCCATTCGATTAGTCAATGGATGCTTAGCAATCGTCTGGGACGACCTGAGGAGCCTGTGCCTCTTCAGCTACCACCTCTTGAGAGACTTACTCTTGATTGCGACGAGAGTTGTGGAACTTCTGGGACGCAGGGGGTGGGAAGCCCTCAAGTATTGGTGGAATCTCCTGCAGTATTGGATTCAGGAACTAAAGAGTAGTGCTGTTAATTTGTTTAATGCCACAGCTATAGCAGTAGCTGAGGGGACAGATAGGGTTATAGAAGTAGTACAAAGACTTTGTAGAGCTATTTGCAACATACCTAGAAGAATCAGACAGGGCTTCGAAAGGGCTTTGCAATAAAGATGGGTGGCAAGTGGTCAAAACCTAGCCTGGGAGGATGGGCCGCTGTAAGGGAAAGAATGAGACGAACTGAGCCAGCAGCAGAAGGGGTGGGAGCAGTATCTCGAGACTTGGAGAGACGCGGAGCAATTACAAGTAGCAATACAGCAGCTACTAATGCTGATTGTGCCTGGCTAGAAGCACAAGAGGATGAGGAGGTGGGCTTCCCAGTCAGACCTCAGGTACCTTTAAGACCAATGACTTACAAAGCAGCTTTAGATATTAGCCATTTTTTAAAAGAAAAGGGGGGACTGGAAGGGCTAATTCACTCCCAAAAAAGACAGGAGATCCTTGATCTGTGGGTCTACCACACACAAGGCTACTTCCCTGATTGGCAGAACTACACACCAGGGCCAGGGATCAGATATCCACTGACCTTTGGATGGTGCTTCAAGCTAGTACCAGTTGATCCAGAACAAGTGGAAGAGGCCAATAAAGGAGAGAACAACTGCCTGTTACACCCTATGAGCCAGCATGGGGCGGATGACCCAGAGAAAGAAGTGTTAATGTGGAGGTTTGACAGCCTCCTAGCAGTTCGTCACATGGCCCGAGAGCTGCATCCGGAGTACTACGAGAACTGCTGACATTGAGCTTTCTACAAGGGACTTTCCGCGGGGGACTTTCCAGGGGAGGCGTGGCCTGGGCGGGACTGGGGAGTGGCGAGCCCTCAGATGCTGCATATAAGCAGCTGCTTTTG
>A2.CD.97.97CDKTB48.AF286238_B.BO.99.BOL0122.AY037270
TTTTTCGAAGCGAAGTACCAGGGAAGTTCTCTCGACGCAAGACTCGGCTTGCTGAGGTGCACACGGCAAGAGGCGAGAAGCGACGGCTGGTGAGTACGCCTAAAATTTTTGACTAGCGGAGGCTAGAAGGAGAGAGATGGGTGCGAGAGCGTCAGTATTGAGCGGCGGAAAATTAGAAGCTTGGGAGAAAATTCGGTTAAGGCCAGGGGGAAAGAAAAAATATAGACTGAAACATTTAGTATGGGCAAGCAGGGAGCTGGAAAAATTCTCAATCAACCCCAGCCTTTTAGAAACAGAAACAGGATGTAGACGAATATTTGGGCAATTACAACCAGCTCTCGAGACAGGAACAGAAGAACTTAGATCATTATATAATACAATAGCAGTCCTCTACTTTGTTCATCAAAAGATAGAGGTAAAAGACACCAAGGAAGCTCTAGATAAAATAGAGGAAGAACAAAACAAATGCAAGCAGAAGACACAGCAGGCAGCAGCTGACACAGGAAGCAGCAGCAGTCAAAATTACAGAGGTAGCAGCAGTCAAAATTACCCTATAGTGCAAAATGCACAAGGGCAAATGGTACACCAGGCCGTGTCACCTAGGACTTTGAATGCATGGGTCAAAGTAGTTGAAGAGAAGGCTTTTAGCCCAGAAGTAATACCCATGTTTACAGCATTATCAGAAGGAGCCACCCCACAAGACTTAAATACTATGCTAAACACAGTGGGGGGACATCAAGCAGCTATGCAAATGTTAAAAGATACCATCAATGAGGAAGCTGCAGAATGGGACAGGTTACATCCAGTACAGGCAGGGCCTATTCCACCAGGCCAGATGAGAGAACCAAGGGGAAGTGACATAGCGGGAGCTACTAGTAACCTTCAGGAACAAATAGGATGGATGACCAGCAACCCACCTATTCCAGTGGGAGAAATCTATAAAAGATGGATAATCCTGGGATTAAATAAAATAGTAAGAATGTATAGCCCTGTCAGCATTTTGGACATAAAACAAGGGCCAAAAGAACCCTTTAGAGACTATGTAGATAGGTTCTTTAAAACTCTCAGAGCTGAGCAAGCTACACAGGAGGTAAAAAATTGGATGACAGACACCTTGCTGGTCCAAAATGCAAACCCAGATTGTAAATCCATCTTGAGGGCATTAGGACCAGGGGCTACATTAGAAGAAATGATGACAGCATGTCAGGGAGTGGGAGGACCCGGCCATAAAGCAAGGGTTTTAGCTGAAGCAATGAGCCAAGTACAAAATACAAACATAATGATACAGAGAGGCAATTTTAAGGGTCAAAAAAGAATTAAGTGTTTCAACTGTGGCAAGGAAGGACACCTAGCTAGAAATTGCAGGGCCCCTAGGAAAAAGGGCTGCTGGAAATGTGGGAAGGAAGGACATCAAATGAAAGACTGCACTGAGAGACAGGCTAATTTTTTAGGGAAAATTTGGCCTTCCAACAAAGGGAGGCCAGGGAATTTTCCTCAGAGCAGGACAGAGCCAACAGCCCCACCAATGGAGGAAGAGATAACCTCCTCGCTGAAGCAGGAGAACAGGGAGCCGTCCACCCCTGCAATTTCCCTCAAATCACTCTTTGGCAACGACCTCTTGTCACAGTGAAAATAGAAGGACAGCTAAGAGAAGCTTTATTAGATACAGGAGCAGATGATACAGTGTTAGAAGACATAAATCTGCCATGGAAATGGAAACCAAAAATGATAGGGGGAATTGGAGGTTTTATCAAAGTAAGACAATATGATCAGATAGTTATAGAAATTTGTGGAAAAAGGGCTATCGGTACAGTATTAGTAGGACCTACACCTGTCAACATAATTGGAAGAAATATGTTGGTTCAGCTTGGTTGTACTCTAAATTTTCCAATTAGTCCTATTGAAACTGTACCAGTAAAATTGAAGCCAGGAATGGATGGTCCAAAGGTCAAACAATGGCCATTGACAGAAGAAAAAATAAAAGCATTAACAGAAATTTGTAAAGAAATGGAAAAGGAAGGGAAAATTTCAAAAATTGGGCCTGAAAATCCATACAACACTCCAGTGTTTGCTATAAAGAAAAAAGACAGCGATAAATGGAGAAAATTAGTAGATTTCAGAGAACTCAATAAGAGAACTCAAGACTTCTGGGAAGTTCAGTTAGGAATACCACACCCAGCGGGATTAAAAAAGAAAAAATCAGTAACAGTATTAGATGTGGGGGACGCATATTTTTCCGTTCCCCTACATGAAGACTTCAGGAAATATACTGCATTCACCATACCTAGTATAAACAATGAGACACCAGGAATTAGGTATCAGTACAATGTACTTCCACAGGGATGGAAAGGATCACCAGCAATATTCCAGAGTAGCATGACAAAAATCCTAGATCCCTTTAGGGCAAGAAATCCAGAGATGGTCATCTACCAATACATGGATGACTTGTATGTAGGATCTGATTTAGAAATAGATCAGCATAGAGCAAAAATAGAGGAGTTAAGGGCTCATTTATTAAGATGGGGATTTACTACACCAGACAAAAAGCATCAGAAAGAACCTCCATTTCTGTGGATGGGATATGAGCTTCATCCTGACAAGTGGACAGTCCAGCCTATAAAGCTGCCAGAAAAAGACAGCTGGACTGTCAATGATATACAGAAATTAGTAGGAAAGTTAAATTGGGCAAGTCAGATTTATGCAGGGATTAAAGTAAGGCAACTGTGTAAACTCCTTAGAGGAACCAAAGCATTAACAGACATAGTACCACTGACTAGAGAAGCAGAATTAGAATTGGAAGAGAACAGGGAGATTCTAAAAGACCCTGTACATGGGGTATATTATGACCCATCAAAAGACTTAATAGCAGAAATACAGAAACAAGGGCAAGGCCAATGGTCATATCAAATTTATCAAGAACCATTTAAAAATCTAAAAACAGGGAAATATGCAAAAAGGAAGTCCACCCACACCAATGATGTAAAACAATTAACAGAAGCAGTACAAAAAATAGCCACAGAAAGCATAGTAATATGGGGAAAGATTCCTAAATTTAGACTACCCATACAAAAGGAAACATGGGAAACATGGTGGACAGAGTATTGGCAAGCCACCTGGATTCCCGAGTGGGAGTTTGTCAATACCCCTCCCTTAGTGAAATTATGGTACCAATTAGAGAAAGACCCCATAGAAGGAGTAGAAACTTTCTATGTAGATGGGGCAGCTAATAGGGAGACCAAATTAGGAAAAGCAGGATATGTTACTAATAGAGGAAGACAAAAAGTTGTCTCCCTAACTGACACAACAAATCAGAAGACTGAGTTACAAGCAATTTATTTAGCTTTGCAGGATTCAGGACCAGAAGTAAACATAGTAACAGACTCACAATATGCATTAGGAATCATTCAAGCACAACCAGATAGGAGTGAATCAGAGATAGTCAGTCAAATAATAGAACAGTTAATAAAAAAGGAAAAGGTCTACCTGGCATGGGTACCAGCACACAAAGGAATTGGAGGAAATGAACAAGTAGACAAATTAGTCAGTGCTGGAGTCAGGAAAGTACTATTTCTGGATGGAATAGATAAGGCCCAAGATGAGCATGAGAAATATCACAGTAATTGGAGAGCAATTGCTAGTGATTTTAACCTGCCACCTGTAGTAGCAAAACAAATAGTAGCTAACTGTGATAAATGTCAGGTAAAGGGAGAAGCCATGCATGGACAAGTAGACTGTAGTCCAGGAATATGGCAACTAGATTGTACACATTTAGAAGGAAAAATTATCCTGGTAGCAGTTCATGTAGCCAGTGGATATATAGAAGCAGAAGTTATCCCAGCAGAAACAGGGCAGGAAACAGCATACTTTATCTTAAAATTAGCAGGAAGGTGGCCAGTAAAAACAATACATACAGACAATGGCAGCAATTTCACCAGTAATGCGGTCAAGGCCGCCTGCTGGTGGGCAGGGGTCAAGCAGGAATTTGGCATTCCCTACAATCCCCAAAGTCAAGGAGTAGTAGAATCTATGAATAATGAATTAAAGAAAATTATAGGACAAGTAAGAGATCAGGCTGAACATCTTAAAACAGCAGTACAAATGGCAGTATTCATCCACAATTTTAAAAGAAAAGGGGGGATTGGGGGGTACAGTGCAGGGGAAAGAATAGTAGACATAATAGCAACAGACATACAAACTAAAGAACTACAAAAACAAATTACAAAAATTCAAAATTTTCGGGTTTATTACAGGGACAGCAGAGATCCACTTTGGAAAGGACCAGCAAAGCTCCTCTGGAAAGGTGAAGGGGCAGTAGTAATACAAGATAATAGTGACATAAAAGTAGTGCCAAGGAGAAAAGCAAAGATCATTAGGGATTATGGAAAACAGATGGCAGGTGATGATTGTGTGGCAAGTAGACAGGATGAGGATTAAAACATGGAAAAGTTTAGTAAAACACCATATGTATATTTCAAAGAAAGCTAAGGGATGGTGTTATAGACATCACTATGAAAACCTTCATCCAAGAATAAGTGGAGAAGTACACATCCCATTAGGACCTGCTAAATTGGTGATAACAACATATTGGGGCCTGCATACAGGAGAAAGAGACTGGCATTTGGGTCAGGGAGTCTCCATAGAATGGAGAAAGGAGAGATATGCAACACAAGTAACCCCTGACATAGCAGACCAACTAATTCATCTGTATTATTTTGATTGTTTTGCAGACTCTGCTATAAGAAAGGCCATATTAGGACGTATAGTTAGCCCTAGTTGTGACTTTCGAGCAGGACATAACAAGGTAGGATCTCTACAGTACTTGGCACTAGCAGCATTAGTAACACCAAAAAAGACAAAGCCACCTTTGCCTAGTCTTCAGATACTGACAGAGGATAGATGGAACAAGCCCCAGAAGACCAAGGGCCACAGAGAGAGCCACACAATGAATGGACACTAGAACTTTTAGAAGAGCTTAAGAGTGAAGCTGTTAGACATTTTCCTAGGACGTGGCTCCAGGGCTTGGGACAACATATCTATGAAACTTATGGGGATACTTGGGCAGGAGTGGAAGCCATAATAAGAATACTGCAACAACTGCTGCTTATTCATTTCAGAATTGGGTGTCGACATAGCAGAATAGGCATCACTTACCAGAAAAGAGCAAGAAATGGAGCCAGTAGATCCTAGACTAGAGCCCTGGAAGCATCCAGGAAGTCAGCCTAAAACTGCTTGTACCAATTGCTATTGCAAAAAGTGTTGCTTTCATTGCCAAGTTTGTTTTATAAAAAAAGGCTTAGGCATCTCCTATGGCAGGAAGAAGCGGAGACAGCGACGAAGATCTCCTCCAGACAGTCAGACTCATCAAGTTCCTCTACCAAAGCAGTGAGTAGTATATGTAATGCAATCTTTAATAATATTAGCAATAGTAGCATTAGTAGTAGCAGCAATACTAGCAATAGTTGTGTGGACTATAGTATTCATAGAATATAGGAAAATACTAAGACAAAGAAAAATAGATAGGTTAATTGATAGAATAAGAGAAAGAGCAGAAGACAGTGGCAATGAGAGTGAAGGGGATCAAGATGAATTGTCAGTACTTGTGGGGATGGAGCACCATGATGCTCCTTGGGATGTTAATGATCTGTAGTGCTACAGAACAATTGTGGGTCACAGTCTATTATGGGGTACCTGTGTGGAAAGAAGCAACCACCACTCTATTTTGTGCATCAGATGCTAAAGCATATAGTACAGAGAAACATAATATTTGGGCCACACATGCCTGTGTACCCACAGACCCCAACCCACAAGAAGTACCATTGGAAAATGTGACAGAAAATTATAACATGTGGAAAAATAACATGGTAGAACAGATGCATGAGGATATAATCAGTTTATGGGATCAAAGCCTAAAGCCATGTGTAAAACTAACCCCACTTTGTGTCACTTTAAACTGTACTAATGTAACCATAAGTAATAATAGTACAGGAGATATGAAAAACTGCTCTTTCAATATCACTGCAGGAATAAAGGATAAGGTAAAGAAAGAATATGCACTTTTTTATAATCTTGATGTAGTACCCATAGATGATGATAATGGTAGTACCACCTATAGGTTGATAAATTGTAATACCTCAATTATTACACAAACCTGTCCAAAGGTAACCTTTGAGCCAATTCCCATACATTATTGTACTCCAGCTGGTTTTGCAATTCTAAAATGTAATGATAAGAATTTCAATGGAACAGGACCATGTAAAAATGTCAGCACAGTACAATGTACACATGGAATTAGACCAGTAGTGTCAACTCAACTGCTGTTAAATGGCAGTCTAGCAGAGGAAGAAATAGTAATTAAATCTGAAAATTTCACGGACAATGCTAAAACCATAATAGTACAGCTGAATAAATCTATATCAATTAATTGTACAAGACCCAATAACAATACAAGAAAAAGTATAAATATAGGACCAGGGAGAGCACTTTATGCAACAGGAGAAATAATAGGAAACATAAGGCAAGCACATTGTAACATTAGTGCAACAGAATGGAATAACACTTTAGAACAGATAGTCACAAAATTAGGAGAACAATTTGGGGTAAATAAAACAATAATCTTTAATCAATCCTCAGGAGGGGACCCAGAAATTGTAATGCACAGTTTTAATTGTGGAGGGGAATTCTTCTACTGTAATACAACAGAACTGTTTAATAGTACTTGGAATTTTACTAGTACCTGGAATATGACTAGTGGGTCAAATTACTCTGCAGAAAGAAATATCATCACACTCTCATGCAGAATAAAACAAATTATAAACATGTGGCAGGAAGTAGGAAAAGCAATGTATGCCCCTCCTATCAGAGGACAAATTAAATGTTCATCAAATATTACAGGGCTGCTATTAACAAGAGATGGTGGGGATAATAACAGAAGCACCGAGACCTTTAGACCTGGAGGAGGAAATATGAGAGACAATTGGAGAAGTGAATTATATAAATATAAAGTAGTAAAAATTGAACCATTAGGAGTAGCACCCACCAGGGCAAGGAGAAGAGTGGTGCAAAGAGAAAAAAGAGCAGTGGGAACGATAGGAGCTATGTTCCTTGGGTTCTTGGGAGCAGCAGGAAGCACTATGGGCGCAGCGTCAGTGACGCTGACGGTACAAGCCAGACAATTATTGTCTGGTATAGTGCAGCAGCAGAACAATCTGCTGAGGGCTATTGAGGCGCAACAGCATATGTTGCAACTCACAGTCTGGGGCATCAAGCAGCTCCAGGCAAGACTCCTGGCTGTGGAAAGATACCTAAGGGATCAACAGCTCCTAGGGATTTGGGGATGCTCTGGAAAACTCATTTGCACCACTAATGTGCCCTGGAATAGTAGTTGGAGTAATAAATCTCTGAGTAAGATTTGGGATAACATGACCTGGATGGAGTGGGAAAGAGAAATTGACAATTACACAGGCTTAATATATACTTTAATTGAAGAATCACAGAACCAACAAGAAAAGAATGAACAAGAATTATTAGAATTACATAAATGGGCAAGTTTGTGGAATTGGTTTGACATAACAAAGTGGCTATGGTATATAAAAATATTCATAATGATAGTAGGAGGTTTGGTAGGTTTAAGAATAGTCTTTGCTGTGCTTTCTATAGTAAATAGAGTTAGGCAGGGATACTCACCATTATCATTTCAGACCCGCCTCCCAACCCCGAGGGGACCCGACAGGCCAGAAGGAATCGAAGAAGAAGGTGGAGAGAGAGACAGAGACACATCCAGGCCGTTAGTGCATGGATTATTAGCACTCATCTGGGACGATCTACGGAGCCTGTGCCTCTTCAGCTACCACCGCTTGAGAGACTTACTCTTGATTGTAACGAGGATTGTGGAACTTCTGGGACGCAGGGGGTGGGAGATCCTCAAATACTGGTGGAATCTCCTACAGTATTGGGGTCAGGAACTAAAGAATAGTGCTGTTAGCTTGCTCAACGCCACAGCTATAACAGTAGCTGAAGGAACAGATAGGATCATAGAAATAGTACAAAGAGCTTATAGAGCTATTCTCCACATACCTACAAGAATAAGACAGGGCTTAGAAAGGGCTTTGCTATAAGATGGGTGGCAAGTGGTCAAAAAGTAAGGGATGGGCTGCTGTAAGGGAAAGAATGAGAAAAGCTGAGCCAGCAGCAGATGGGGTAGGAGCAGCATCTCGAGACCTGGAAAAACATGGAGCAATCACAAGTAGCAATACAGCAGAAACTAATGCAGATGTAGCCTGGCTAGAAGCACAAGAGGAGGAGGAGGTGGGCTTTCCAGTCAGACCTCAGGTACCTTTAAGACCAATGACTTACAAAGCAGCTATAGATCTCAGCCACTTTTTAAGAGAAAAGGGGGGACTGGAAGGGCTAGTTTACTCCCAAAGAAGAGTAGATATCCTTAATCTGTGGGTCTACCACACGCAAGGCTTCTTCCCAGATTGGCATAACTACACACCAGGGCCAGGGACCAGATGGCCACTGACCTTTGGATGGTGCTTCAAGCTAGTACCACTTGATCCAGACCAAGTAGAAAGAGCCAATGAAGGAGAGAACAACAGCCTGCTGCACCCTATGAGCCAACATGGGATGGATGACCCGGAGAAAGAAGTGTTGGTGTGGAAGTTTGACAGCCGCCTAGCCTTTCATCATATGGCCCGAGAGCTGCACCCAGAGTTCTACAAAGATTGATTGCTGACAGTGTTCTACAGAGAGTGCTGACAGAGAGTTTTCTACAAGGGACTTTCCACTGGGGACTTTCCAGGGGAGGCGTGGACTGGGCGGGACAGGGGAGTGGCGAGCCCTCAGATGCTGCATATAAGCAGCTGCTTTTTGCCTGTACTGGGTCTCTCTGGTTAGACCAGATCTGAGCCTGAGAGCTCTCTGGCTGACTAGGGAACCCACTGCTTAA
>A2.CD.97.97CDKTB48.AF286238_C.ZA.04.04ZASK173B1.DQ093604
TTTTTCGAAGCGAAGTACCAGGGAAGTTCTCTCGACGCAAGACTCGGCTTGCTGAGGTGCACACGGCAAGAGGCGAGAAGCGACGGCTGGTGAGTACGCCTAAAATTTTTGACTAGCGGAGGCTAGAAGGAGAGAGATGGGTGCGAGAGCGTCAGTATTGAGCGGCGGAAAATTAGAAGCTTGGGAGAAAATTCGGTTAAGGCCAGGGGGAAAGAAAAAATATAGACTGAAACATTTAGTATGGGCAAGCAGGGAGCTGGAAAAATTCTCAATCAACCCCAGCCTTTTAGAAACAGAAACAGGATGTAGACGAATATTTGGGCAATTACAACCAGCTCTCGAGACAGGAACAGAAGAACTTAGATCATTATATAATACAATAGCAGTCCTCTACTTTGTTCATCAAAAGATAGAGGTAAAAGACACCAAGGAAGCTCTAGATAAAATAGAGGAAGAACAAAACAAATGCAAGCAGAAGACACAGCAGGCAGCAGCTGACACAGGAAGCAGCAGCAGTCAAAATTACAGAGGTAGCAGCAGTCAAAATTACCCTATAGTGCAAAATGCACAAGGGCAAATGGTACACCAGGCCGTGTCACCTAGGACTTTGAATGCATGGGTCAAAGTAGTTGAAGAGAAGGCTTTTAGCCCAGAAGTAATACCCATGTTTACAGCATTATCAGAAGGAGCCACCCCACAAGACTTAAATACTATGCTAAACACAGTGGGGGGACATCAAGCAGCTATGCAAATGTTAAAAGATACCATCAATGAGGAAGCTGCAGAATGGGACAGGTTACATCCAGTACAGGCAGGGCCTATTCCACCAGGCCAGATGAGAGAACCAAGGGGAAGTGACATAGCGGGAGCTACTAGTAACCTTCAGGAACAAATAGGATGGATGACCAGCAACCCACCTATTCCAGTGGGAGAAATCTATAAAAGATGGATAATCCTGGGATTAAATAAAATAGTAAGAATGTATAGCCCTGTCAGCATTTTGGACATAAAACAAGGGCCAAAAGAACCCTTTAGAGACTATGTAGATAGGTTCTTTAAAACTCTCAGAGCTGAGCAAGCTACACAGGAGGTAAAAAATTGGATGACAGACACCTTGCTGGTCCAAAATGCAAACCCAGATTGTAAATCCATCTTGAGGGCATTAGGACCAGGGGCTACATTAGAAGAAATGATGACAGCATGTCAGGGAGTGGGAGGACCCGGCCATAAAGCAAGGGTTTTAGCTGAAGCAATGAGCCAAGTACAAAATACAAACATAATGATACAGAGAGGCAATTTTAAGGGTCAAAAAAGAATTAAGTGTTTCAACTGTGGCAAGGAAGGACACCTAGCTAGAAATTGCAGGGCCCCTAGGAAAAAGGGCTGCTGGAAATGTGGGAAGGAAGGACATCAAATGAAAGACTGCACTGAGAGACAGGCTAATTTTTTAGGGAAAATTTGGCCTTCCAACAAAGGGAGGCCAGGGAATTTTCCTCAGAGCAGGACAGAGCCAACAGCCCCACCAATGGAGGAAGAGATAACCTCCTCGCTGAAGCAGGAGAACAGGGAGCCGTCCACCCCTGCAATTTCCCTCAAATCACTCTTTGGCAACGACCTCTTGTCACAGTGAAAATAGAAGGACAGCTAAGAGAAGCTTTATTAGATACAGGAGCAGATGATACAGTGTTAGAAGACATAAATCTGCCATGGAAATGGAAACCAAAAATGATAGGGGGAATTGGAGGTTTTATCAAAGTAAGACAATATGATCAGATAGTTATAGAAATTTGTGGAAAAAGGGCTATCGGTACAGTATTAGTAGGACCTACACCTGTCAACATAATTGGAAGAAATATGTTGGTTCAGCTTGGTTGTACTCTAAATTTTCCAATTAGTCCTATTGAAACTGTACCAGTAAAATTGAAGCCAGGAATGGATGGTCCAAAGGTCAAACAATGGCCATTGACAGAAGAAAAAATAAAAGCATTAACAGAAATTTGTAAAGAAATGGAAAAGGAAGGGAAAATTTCAAAAATTGGGCCTGAAAATCCATACAACACTCCAGTGTTTGCTATAAAGAAAAAAGACAGCGATAAATGGAGAAAATTAGTAGATTTCAGAGAACTCAATAAGAGAACTCAAGACTTCTGGGAAGTTCAGTTAGGAATACCACACCCAGCGGGATTAAAAAAGAAAAAATCAGTAACAGTATTAGATGTGGGGGACGCATATTTTTCCGTTCCCCTACATGAAGACTTCAGGAAATATACTGCATTCACCATACCTAGTATAAACAATGAGACACCAGGAATTAGGTATCAGTACAATGTACTTCCACAGGGATGGAAAGGATCACCAGCAATATTCCAGAGTAGCATGACAAAAATCCTAGATCCCTTTAGGGCAAGAAATCCAGAGATGGTCATCTACCAATACATGGATGACTTGTATGTAGGATCTGATTTAGAAATAGATCAGCATAGAGCAAAAATAGAGGAGTTAAGGGCTCATTTATTAAGATGGGGATTTACTACACCAGACAAAAAGCATCAGAAAGAACCTCCATTTCTGTGGATGGGATATGAGCTTCATCCTGACAAGTGGACAGTCCAGCCTATAAAGCTGCCAGAAAAAGACAGCTGGACTGTCAATGATATACAGAAATTAGTAGGAAAGTTAAATTGGGCAAGTCAGATTTATGCAGGGATTAAAGTAAGGCAACTGTGTAAACTCCTTAGAGGAACCAAAGCATTAACAGACATAGTACCACTGACTAGAGAAGCAGAATTAGAATTGGAAGAGAACAGGGAGATTCTAAAAGACCCTGTACATGGGGTATATTATGACCCATCAAAAGACTTAATAGCAGAAATACAGAAACAAGGGCAAGGCCAATGGTCATATCAAATTTATCAAGAACCATTTAAAAATCTAAAAACAGGGAAATATGCAAAAAGGAAGTCCACCCACACCAATGATGTAAAACAATTAACAGAAGCAGTACAAAAAATAGCCACAGAAAGCATAGTAATATGGGGAAAGATTCCTAAATTTAGACTACCCATACAAAAAGAAACATGGGAGACATGGTGGACGGAGTGGTGGCAGGCTACCTGGATTCCTGAGTGGGAGTTTGTCAATACCCCTCCTCTAGTAAAACTATGGTACCAGTTAGAAACAGAACCCATAGCAGGAGCAGAAACTTTCTATGTAGATGGGGCAGCTAATAGAGAGACTAAACTAGGAAAGGCAGGGTATGTCACTGATAGAGGAAGACAAAAAATTGTCCCCTTGACAGAGACAACAAATCAAAAGACTGAATTACATGCAATCTATTTGGCTTTACAGGATTCAGGGTCAGAAGTAAACATAGTAACAGATTCACAGTATGCATTAGGAATCATTCAAGCGCAACCAGATAGCAGTGAATCAGAGTTAGTCAATCAAATAATAGAAAAGTTAATAGAAAAGGAAAGGGTCTACCTGTCATGGGTACCAGCACACAAAGGGATTGGAGGAAATGAACAGGTGGATAAATTAGTCAGTTGTGGAATCAGAAAAGTGTTATTTTTAGATGGGATAGATAAGGCTCAAGAAGAACATGAAAAATATCACAGTAATTGGAGAGCAATGGCTCATGACTTTAATCTGCCACCTATAGTAGCCAAAGAAATAGTAGCCAGCTGTGATAAATGGTCAGGCTAAAAGGGGAAGCCATGCATGGACAAGTAGACTGCAGTCCAGGAATATGGCAACTAGATTGCACACATCTAGAAGGAAAAATTATCGTGGTAGCAGTCCATGTAGCCAGTGGCTATATAGAAGCAGAAGTCATCCCAGCAGAGACAGGACAGGAGACAGCATACTTTCTATTAAAATTAGCAGGAAGATGGCCAGTAAAAGTAATACATACAGACAATGGGCCCAATTTCACCAGTGCAGCAGTTAAGGCAGCCTGTTGGTGGGCAGATGTCAAACAGGAATTTGGGATTCCCTACAATCCCCAAAGTCAAGGAGTAGTGGAATCTATGAATAAAGAATTAAAGAAAATCATAGGGCAGGTAAGAGATCAAGCTGAACATCTTAAGACAGCAGTGCAAATGGCAGTGTTCATCCACAATTTTAAAAGAAAAGGGGGGATTGGGGGATACAGTGCAGGGGAAAGAATAATAGACATAATAGCAACAGATATACAAACTAAAGAATTACAAAAACAAATCATAAAAATTCAAAATTTTCGGGTTTATTACAGGGACAGCAGAGATCCAATTTGGAAAGGACCAGCAAAACTCCTTTGGAAAGGTGAAGGGGCAGTAGTAATACAAGACAATGGTGATATAAAAGTAGTACCAAGAAGAAAAGCAAAGATCATTAGGGATTATGGAAAACAGATGGCAGGTGATGATTGTGTGGCAGGTAGACAGGATGAGGATTAGAACATGGAACAGTCTAGTAAAACATCATATGTATGTGTCAAAGAAAGCTAGAGAGTGGTTCTATAGACATCACTATGAAAGCAGACATCCAAGAGTAAGTTCAGAAGTACACATCCCGCTAAAGGAGGCTAGATTAATAGTAAGAACATATTGGGGTCTGCACCCAGGAGAAAAAGACTGGCACTTGGGTCATGGGGTCTCCATAGAATGGAGGCAGGGAAGGTACAGTACACAAATAGACCCTGATCTGGCAGACCATCTAATCCATCTGTATTATTTTGACTGTTTTTCAGAATCTGCCATAAGGAGAGCCATATTAGGAGAAATAGTTAGGCCTAGATGTGAATATCAAGCAGGACATAATAAGGTAGGGTCTCTGCAATATTTGGCATTGAGAGCATTAGTAGCTTCAACAAGGACAAAGCCACCTTTGCCTAGTGTTAGGAAATTAGTAGAGGATAGATGGAACAAGCCCCAGAAGACCAGGGGCCACCGAGGGAGCCACACAATGAATGGGTGTTAGAACTGTTAGAGGAGCTAAAGCAAGAAGCAGTTAGACATTTCCCTAGGCCGTGGCTACATGGCCTGGGACAACATATCTATAATACCTATGGGGATACTAGGGAGGGAGTTGAAGCTATAGTAAGAATTTTGCAACAACTACTGTTTGTTCATTTCAGAATTGGGTGCCAACATAGCAGAATAGGCATTATTCCAAGAAGAAGAGTAAGGGATGGAGCCAGTAGACCCTAACTTAGAGCCCTGGAACCATCCGGGAAGCCAGCCTAAAACTGCTTGTAACAATTGCTATTGTAAAAAGTGTTGCTATCATTGCCAAAGGTGCTTTCTAAACAAAGGCTTAGGCATCTCCTATGGCAGGAAGAAGCGGAGACCCCGACGAGGACCTGATCAGGGCAATACGGATCATCAAAATCCTGTACCAAAGCAGTAAGTAGTAGTAATCAATATAGGTAATGTCACCTTTAGCAATACTGTCAATAGTAGGACTGGTAGTAGCATCAATTTTAGCAATAGTTGTGTGGACTGTAGTATTTATAGAATATAGAAAGATTAAGAAGCAAAGGAAAATAGACTGGTTACTTGAGAGAATAAGTGAAAGAGCAGAAGACAGTGGCAACGAGAGTGATGGGGACACAGAGGAATTGTCAAAAATGGTGGGAATGGGGAATCTTGGTTTTTGGGATGATAATGATGTGTAAGGCTGCAGATTTGTGGGTCACAGTATACTATGGAGTACCTGTGTGGAGAGATGCAGATACCACCCTATTTTGTGCATCAGACGCTAAAGCATATGCTACAGAAAAGCATAATGTCTGGGCCACACATGCCTGTGTACCCACAGACCCCAACCCACAAGAAGTAAACCTGGCAAATGTAACAGAAGATTTTAACATGTGGAAAAATAACATGGTAGAGCAGATGCATGCAGATATAATCAGTCTATGGGATCAAAGCCTAAAGCCATGTGTAAAATTAACCCCTCTCTGCGTCACTTTAAATTGTAGCAATGCCAACACCACTAACACCAATAGCACTGAAGAAATAAAAAACTGCTCTTACAATATGCCCACAGAACTAAAAGATAAAACACAGAAAGTCTATTCACTGTTTTATGAACTTGATGTAGTACTACTTAAGGGCAGCAACTCTAGTGAGTATATATTAATAAATTGTAATACCTCAACCATAGCACAAGCCTGTCCAAAGGTCTCTTTTGACCCAATTCCTATACATTATTGTGCTCCAGCTGGTTATGCGATTCTAAAGTGTAATAATAAGACATTCAATGGGACAGGACCATGTCAGAATGTTAGCACAGTACAATGTACACATGGAATTAAGCCAGTGGTATCAACTCAACTACTGTTAAATGGTAGCCTAGCAGAAGAGATAATAATTAGATCTGAAAACTTGACAAACAATGCCAAAACAATAATAGTACATCTTAATGAGACTGTAAACATTACGTGTATAAGACCCGGCAATAATACAAGAAAAAGTATAAGGATAGGACCAGGACAAACATTCTATGCAACAGGAGACATAATAGGAGACATCAGAAAAGCACATTGTAACATTAGTGCAAGTGAATGGAGTAGAACTTTACAGGGGGTAAGTAAAAAGTTAAGAGAATACTTCCCTAATAAAACAATAGTATTTAATTCATCTTCAGGAGGGGACCTAGAAATTACAACACATAGCTTTAATTGTGGAGGAGAATTTTTCTATTGCAATACATCAAGCCTGTTCAATAGCAGTTATAATGGCACAAATAATAGTAGTTACAATAGTACAGGAGACATCACACTCCCATGCAGAATAAAACAAATTATAAACATGTGGCAGAAGGTAGGACGAGCAATATATGCCCCTCCCATTGCAGGAAACATAACATGTAATTCAACTATCACTGGACTACTCTTGGTAAGAGATGGAGGCAACTCAAATAACCTAAGTGAGACATTCAGACCAGCAGGAGGAAATATGAAGGATAATTGGAGAAGTGAACTATATAAATATAAAGTGGTAGAAATTAAGCCATTGGGAATAGCACCCACTAAGGCAAAAAGGCGAGTGGCGGAGAGAGAAAAAAGGGCAGTAGGAATAGGAGCTGTGTTCCTTGGGTTCTTGGGAGCAGCAGGAAGCACTATGGGCGCAGCGTCAATAGCGCTGACGGCACAGGCCAGACAAGTGTTGTCTGGAATAGTGCAACAGCAAAGCAATTTGCTGAGGGCTATAGAGGCGCAACAGCATATGTTGCAACTCACAGTCTGGGGCATTAAGCAGCTCCAGGCAAGAGTCCTGGCTATAGAAAGATACCTACAGGATCAACAGCTCCTAGGGATTTGGGGCTGCTCTGGAAAACTCATCTGCACCACTACTGTGCCTTGGAACTCCAGTTGGAGTAATAAATCTCAAGAAGAAATTTGGCAAAACATGACCTGGATGCAGTGGGATAGAGAAATTGAGAAATGCACAGGAATAATATACAGGTTGCTTGGAGACTCGCAAATCCAGCAGGAGAAAAATGAAAAGGACTTATTAGCACTGGACAGTTGGAAAAATTTGTGGAGTTGGTTTAACATATCAAATTGGCTGTGGTATATAAAAATATTCATAATGATAGTAGGAGGCTTAATAGGCTTGAGAATAATTTTTGCTGTGCTTTCTATAGTGAATAGAGTTAGGCAGGGATACTCACCTTTGTCGTTCCAGACCCTTACCCCGAACCCAAGGGAACTCGACAGGCTCGGAAGAATCGAAGAAGAAGGTGGAGAGCAAGACAGAGACAGATCGATTCGATTAGTGCACGGATTCTTAGCACTTATCTGGGACGACTTGAGGAACCTGTGCCTCTTCAGCTACCACCGATTGAGAGACTTAACATTGGTGACAGCGAGAGCGGTGGAACTTCTGGCACGCAGCAGTCTCAAGGGACTACAGAGGGGGTGGGAAGCACTTAAGTATTTGGGAAGTCTTGTGCAGTATTGGGGTCTGGAACTAAAAAAGAGTGCTATTAGTCTGTTTGATACCATAGCAATAGCAGTAGCTGAAGGAACAGATAGAATTATAGAATTAGTACAAAGAATTGGTAGAGCTATCTACAACATACCTAGAAGAATAAGACAGGGCTTTGAAGCAGCTTTGCAATAAAATGGGGGGCAAGTGGTCAAAAAGCAGTATAGTTGGATGGCCTGCTGTAAGAGAAAGAATAAGAAGAACTGAGCCAGCAGCAGAGGGAGTAGGAGCAGCGTCTCAAGACTTAGATAAACATGGAGCACTTACAAGCAGCAACACAGCTGCCACTAATGCTGCTTGTGCCTGGCTAGAAGCACAAGAGGAGGAAGATGAAGTAGGCTTTCCAGTTAAACCTCAGGTGCCTTTAAGACCAATGACTTATAGGGCAGCAGTAGATCTCAGCTTCTTTTTAAAAGAAAAGGGGGGACTGGATGGGTTAATTTACTCTCCAAAGAGGCAAGAAATCCTAGATTTGTGGGTCTATCACACACAAGGCTTCTTCCCTGATTGGCAAAACTACACACCAGGACCAGGGGTCAGATATCCACTGACCTTTGGATGGTGCTACAAGCTAGTGCCAGTTGACCCAAGGGAAGTAGAAGAGAACAACCAAGGAGAAAACAACTGTCTGCTACACCCTATGAGCCAGCAGGGAATGGATGATCCAGATAGAGAAGTATTAAGGTGGAAGTTTGACAGTCTCCTAGCACACAGACACATGGCCCGCGAGCTACATCCGGAGTATTACAAAGACTGCTGACACAGAAGGGACTTCCGCTGGGACAAAGACTGCTGACACAGAAGGGACTTTCCGCTGGGACTTTCCACTGGGGCGTTCTAGGAGGTGTGGTCTGGGCGGGACGGGGAGTGGTCAACCCTCAGATGCTGCATATAAGCAGCTGCTTTTCGCCTGTACTGGGTCTCTCTAGGTAGACCAGATCTGAGCCTGAGAGCTCTCTGGCTAACTAGGGAACCCACTGCTTAAGCCTCAATA
>A2.CY.94.94CY017_41.AF286237_D.UG.99.99UGE13613.AF484515
TTGAAAAGCGAAAGTAACAGGGACTCGAAAGCGAAAGTTCCAGAGGAGTTCTCTCGACGCAGGACTCGGCTTGCTGAGGTGCACACGGCAAGAGGCGAGGGGCGGCGACTGGTGAGTACGCCTAATATTTTTGACTAGCAGAGGCTAGAAGGAGAGAGATGGGTGCGAGAGCGTCAATATTAAGCGGGGGAAAATTAGATGCTTGGGAGAAAATTCGGTTAAGGCCAGGGGGAAAGAAAAAATATAGACTGAAACATTTGGTATGGGCAAGCAGGGAGCTGGAGAAATTCTCAATTAACCCTGGCCTTTTAGAAACACCAGAGGGATGTAGACAAATAATAAGGCAGTTACAACCAGCTCTCCAAACAGGAACAGAAGAACTTAAATCATTATATAATACAGTAGTAGTCCTCTACTGGGTACATCAAAGGGTAGATGTAAAAGACACCAAGGAAGCTCTAGATAAAATAGAGGAAGAACAAAACAAGCAGAAAACACAGCATGCAGCAGCTGACACAGGGAACAGCAGCAGTCAAAATTATCCCATAGTGCAAAATGCACAAGGGCAAATGGTACACCAGGCTATATCACCTAGGACGTTGAATGCCTGGGTCAAAGTAGTAGAAGAAAAGGCTTTCAGCCCAGAAGTAATACCTATGTTTACAGCATTATCAGAAGGAGCCACCCCACAAGACTTAAATACTATGCTAAACACAGTGGGGGGACATCAAGCAGCTATGCAAATGTTAAAAGATACCATCAATGAGGAAGCTGCAGAATGGGACAGGGTACATCCAGTACATGCAGGGCCTATTCCACCAGGCCAGATGAGAGAACCAAGGGGAAGTGACATAGCAGGAACTACTAGTACCCTTCAGGAACAAATAGGTTGGATGACCAGCGATCCACCCATCCCAGTGGGAGAAATTTATAAAAGATGGATAATCCTGGGATTAAATAAAATAGTAAGAATGTATAGCCCTGTCAGCATTTTGGACATAAGACAAGGGCCAAAAGAACCCTTTAGAGATTATGTGGATAGGTTCTTTAAAACTCTAAGAGCTGAGCAAGCCACACAGGAGGTAAAAAACTGGATGACGGACACCTTGCTGGTCCAAAATGCGAACCCAGATTGTAGATCCATCTTGAGAGCATTAGGACCAGGGGCCTCATTAGAAGAAATGATGACAGCATGTCAGGGAGTGGGAGGACCCAGCCATAAAGCAAGGGTTTTGGCTGAAGCAATGAGCCATGTACAAAGTACAAATACAAACATAATGATGCAGAGAGGCAATTTTAGGGGTCAAAAAAGAATTAAGTGTTTCAACTGTGGCAAGGAAGGACACCTAGCCAGAAATTGCAGGGCCCCTAGGAAAAAGGGCTGCTGGAAATGTGGAAAGGAAGGACATCAAATGAAAGATTGCACTGAGAGACAGGCTAATTTTTTAGGGAAAATTTGGCCTTCCAACAAAGGGAGGCCAGGAAATTTTCCTCAGAGCAGAACAGAGCCAACAGCCCCACCAGCAGAGAACTTGAGAATGGGGGAAGAGATAACCTCCTCCCTGAAGCAGGAACTGGAGACCAGGGAACCATACAATCCTGCAATTTCCCTCAAATCACTCTTTGGCAACGACCCCTTGTTACAGTAAAGATAGAGGGACAGCTAAAAGAAGCTCTATTAGATACAGGAGCAGATGATACAGTGTTAGAAGAAATAAATTTGCCAGGAAAATGGAAACCAAAAATGATAGGGGGAATTGGAGGTTTTATCAAAGTAAGACAATATGATCAGATAGCTATAGAAATTTGTGGAAAAAGGGCCATAGGTACAGTATTAGTAGGACCTACCCCTGTCAACATAATCGGAAGAAATATGTTGGTTCAGCTTGGTTGTACTTTAAATTTTCCAATTAGTCCTATTGAAACTGTACCAGTAAAATTAAAGCCAGGAATGGATGGTCCAAAGGTTAAACAATGGCCATTGACAGAAGAAAAAATAAAAGCATTAACAGAAATCTGTAAAGAAATGGAAAAGGAAGGAAAAATTTCAAAAATTGGGCCTGAAAATCCATACAACACTCCAGTGTTTGCTATAAAGAAAAAAGACAGCACTAAATGGAGAAAATTAGTAGATTTTAGAGAACTCAATAAGAGAACTCAAGACTTCTGGGAAGTTCAGTTAGGAATACCACATCCAGCAGGATTAAAAAAGAAAAAAGCAGTAACAGTACTTGATGTGGGGGACGCATATTTTTCCGTTCCCTTACATGAAGACTTCAGAAAATATACTGCATTCACCATACCTAGTACCAACAATGAGACACCAGGAGTTAGGTATCAGTACAATGTACTTCCACAGGGATGGAAAGGATCACCAGCAATATTCCAGAGTAGCATGACAAAGATCTTAGAGCCCTTTAGATCAAAGAATACAGAATTAATCATCTACCAATACATGGATGACTTGTATGTAGGATCTGATTTAGAAATAAGCCAGCATAGAGTAAAAATAGAGGAATTAAGGGCTCACTTATTGAAATGGGGATTTTATACACCAGACAAAAAACATCAGAAAGAACCTCCATTTCTTTGGATGGGATATGAGCTTCATCCTGACAAATGGACAGTCCAGCCTATAAAGCTGCCAGAAAAAGACAGCTGGACTGTCAATGATATACAGAAATTAGTAGGGAAATTAAATTGGGCAAGTCAGATTTATGCAGGGATTAAAGTAAAGCAACTGTGTAAACTCCTTAGAGGAGCCAAAGCACTAACAGACATAGTAACACTGACTAAAGAAGCAGAGTTAGAATTAGAAGAGAACAGGGAAATTTTAAAAACCCCTGTACATGGGGTATACTATGACCCATCAAAAGACTTAATAGCAGAAATACAGAAACAAGGGCAAGACCAATGGACATATCAAATTTATCAGGAACCCTTTAAGAATCTGAAAACAGGGAAATATGCAAAAAGGAGGTCCACCCACACTAATGATATAAAACAGTTAACAGAAGCAGTACAAAAAATAACCATGGAAAGCATAGTGATATGGGGAAAGACTCCTAAATTTAAATTACCCATACAAAAGGAAACATGGGAGACATGGTGGGCGGAGTATTGGCAGGCTACCTGGATTCCTGAGTGGGAGTTTGTCAATACCCCTCCTCTAGTAAAACTGTGGTACCAGTTAGAAAAAGAACCCATAGCAGGAGCAGAAACTTTCTATGTAGATGGGGCAGCTAATAGAGAGACTAAACTAGGAAAGGCAGGGTATGTCACTGACAGAGGAAGACAAAAAATTGTCTCCCTGACGGAGACAACAAATCAAAAGACTGAATTACATGCAATCTATTTGGCTTTACAGGATTCAGGATTAGAAGTGAACATAGTGACAGATTCACAGTATGCATTAGGAATCATTCAAGCACAACCAGAAAGGAGTGAATCAGAGATAGTCAATCAAATAATAGAAAAATTAATAGAAAAGGAAAGGGTCTACCTATCATGGGTACCAGCACACAAAGGGATTGGAGGAAATGAACAAGTAGACAAATTAGTCAGTTCTGGAATCAGGAAAGTGCTATTTTTAGATGGGATAGATAAGGCTCAAGAGGAACATGAAAGATATCACAGCAATTGGAGAGCAATGGCTCATGACTTTAATCTACCACCTGTAGTAGCAAAAGAAATAGTAGCTAGCTGTGATAAATGTCAGCTAAAAGGGGAAGCCATGCATGGACAAGTAGACTGTAGTCCAGGAATATGGCAACTAGATTGCACACATCTTGAAGGAAAAGTTATCCTGGTGGCAGTCCATGTGGCCAGTGGCTATATAGAAGCAGAAGTCATCCCAACAGAAACAGGACAGGATACAGCATACTTTATATTAAAACTAGCAGGAAGATGGCCAGTAAAAGTAATACATACAGACAATGGGCCCAATTTCATCAGTGCAACAGTTAAGGCAGCCTGTTGGTGGGCAGGTATCCAACAAGAATTTGGGATTCCCTACAATCCCCAAAGTCAAGGAGTAGTGGAATCTATGAATAAAGAATTAAAGAAAATCATAGGGCAGGTAAGAGATCAAGCTGAACACCTTAAGACAGCAGTACAAATGGCAGTATTCATTCACAATTTTAAAAGAAAAGGGGGGATTGGGGGATACAGTGCAGGGGAAAGAATAATAGACATAATAGCAACAGATATACAAACTAAAGAACTACAAAGACAAATTACAAAAATTCAAAATTTTCGGGTTTATTACAGGGACAGCAGAGATCCAATTTGGAAAGGACCAGCAAAACTCCTTTGGAAAGGTGAAGGGGCAGTAGTAATACAAGACAATAGTGACATAAAGGTAGTACCAAGAAGAAAAGCAAAGATCATTAGGGATTATGGAAAACAGATGGCAGGTGATGATTGTGTGGCAGGTAGACAGGATGAGGATTAGAACATGGAACAGTTTAGTTAAACATCATATGTATATTTCAAGGAAAGCTAAAGGTTGGGTCTATAAACATCACTATGAAAGCAGAAATCCAAGAATAAGTTCAGAAGTACACATCCCGCTAGGGGAGGCTAGAATAATAGTAAGAACATATTGGGGTCTGCACATAGGAGAAAAAGACTGGCACTTGGGTCATGGAGTCTCCATAGAATGGAGGCAAAACAGGTATCATACACAAATAGACCCTGATCTGGCAGACCATCTAATCCATCTGTATTATTTTGACTGTTTTTCAGAATCTGCCATAAGGAAAGCCATAATAGGAGAAATAGTTAGTCCTAGGTGTGAATATCAAGCAGGACATAACAAGGTAGGGTCTCTGCAATATTTGGCATTGAAAGCAGTAGTAGCTTCAACAAGGACAAAGCCACCTTTGCCTAGTGTTAGGAAATTAGTAGAGGATAGATGGAACAAGCCCCAGAAGACCAAGGGCCACAGAGGGAGCCATACAATGAATGGATGTTAGAACTGTTAGAGGAGCTCAAGCAGGAAGCTGTTAGACATTTCCCTAGGCACTGGCTACATGGCCTAGGACAATACATCTATAATACCTATGGGGATACCTGGGAAGGAGTTGAAGTTATCATAAGATATCTGCAACAACTACTGTTTGTCCATTTCAGAATTGGGTGCCAACATAGCAGGATAGGCATTATTCGAAGAAGAAGAGTAAGGGATGGAGCCAGTAGACCCTAAACTAGAGCCCTGGAACCATCCGGGAAGTCAGCCTAAAACTGCTTGTACCAAATGTTATTGTAAACGCTGTTGCTATCATTGCCAGTTGTGCTTTATAAACAAAGGCTTAGGCATCTCCTACGGCAGGAAGAAGCGACGACCCCGACGAAAGCCTTCTCCAAGCAATAAGGACCATCAAAATCCTATACCAAAGCAGTAAGTAGTAGTAATTAATATATGTAATGTTACCTTTAGTAATATTGGCAATAGTAGGACTGATAGTAGCTTTAATCTTAGCAATAGTTGTATGGACTATAGTATTCATAGAATATAAGAAAATTAAGAAGCAAAGGAAAATAGACTGGTTAATCAAAAGAATAAGTGAGAGAGCAGAAGACAGTGGCAATGAGAGTGATGGGGACACAGAGGAACTATCAGCACTTGTGGAGAGGGGGCATCTTGATTTTGGGGATGTTAATAATGTGTAAAGCTACAGATTTGTGGGTCACAGTATACTATGGAGTACCTGTGTGGAAAGATGCAGATACCATCCTATTTTGTGCATCAGATGCTAAAGCATATGATACAGAAGTGCATAATGTATGGGCCACACATGCCTGTGTACCCACAGACCCCAACCCACAAGAAATAAACCTGGAAAATGTAACAGAAAATTTTAATATGTGGAAAAATAACATGGTAGAGCAGATGCAAGAAGATATAATCAGCTTATGGGATCAAAGCCTAAAGCCATGTGTAAAATTAACCCCGCTCTGCGTCATTTTAAATTGTAGCAATGCCAATACCAGCACCCATAGCAATAGCAGTAGCACCCAGAGCCCCATTAATGAAGAAATAAAAAACTGCTCTTACAATACTACCACAATACTAAGAGATAAGACACAAAAAGTTTATTCACTGTTTTATAGACTTGATGTAGTACAACTTGATGAAAGTGAAAATAAGAATACATCAGGTAGTAATACTCTGTATAGACTAATAAATTGTAATACCTCAACCATCACACAAGCGTGTCCAAAGGTAACCTTTGAGCCAATTCCTATACATTATTGTGCCCCAGCTGGTTTTGCGATTCTAAAGTGTAATGATAAGAAGTTCAATGGGACGGGTCCATGCAAAAATGTCAGCACAGTACAGTGTACACATGGGATTAGGCCAGTAGTGTCAACTCAACTGTTGTTGAATGGCAGTCTAGCAGAAGAAGAAATAATAATTAGATCTGAAAATCTCACAAATAATGCTAAAACCATAATAGTACAGTTTCATGAGTCTGTGTCAATTAATTGCACAAGGCCCTACAACAATACAAGACAAGGTACACATATAGGACCAGGGCGAACACTCTTCACAACAAGGATAATAGGAAATATAAGAAAGGCATATTGTAACATTAGTGAAGAACAATGGAATAAAACTTTACAACAGGTAGCTAAAAAATTAGGAAACCTTCTGAATAAAACAGCAATAAATTTTAGACCATCCTCGGGAGGGGACTTAGAAATTACAACACACAGCTTTAATTGTGGAGGGGAATTTTTCTACTGCAATACATCAGGACTGTTTAATAGTGAATGGAATGATACTACATGGAACGATAATAGTACAAGGACAGATGAGACAATCAAACTCCAGTGCAAAATAAAACAAATTATAAACATGTGGCAGGGAGTAGGAACAGCAATGTATGCTCCTCCCATTGAAGGACTAATCCAATGTAGATCAAATATTACAGGACTATTGTTGACAAGAGATGGTGGTGCAGATGAGAATAAGACTGAGACCTTCAGACCTGGAGGAGGAGATATGAGAGACAATTGGAGAAGTGAATTATACAAATATAAAGTAGTAAGAATTGAACCACTAGGTCTAGCACCCACCAGGGCAAAGAGAAGAGTGGTGGAAAGAGAAAAAAGAGCAATAGGACTAGGAGCTGTGTTCCTTGGGTTCTTGGGAGCAGCAGGAAGCACGATGGGCGCAGCGTCACTGACGCTGACGGTACAGGCCAGACAGTTATTGTCTGGTATAGTGCAACAGCAAAACAATTTGCTGAGGGCTATAGAGGCGCAACAGCATCTGTTGCAACTCACAGTCTGGGGCATTAAACAGCTCCAGGCAAGAGTCCTGGCTGTGGAAAACTACCTAAGGGATCAACAGCTCCTAGGAATTTGGGGTTGCTCTGGAAAACACATTTGCACCACTAATGTGCCCTGGAACTCTAGCTGGAGTAATAAATCTGTAGAGGAGATTTGGGATAACATGACCTGGAGGGATTGGGAGAGAGAAATTGACAATTACACAGGTTTAATATACAGCTTAATTGAAAGGTCACAAATCCAGCAAGAAAAGAATGAACAAGAACTATTGCAATTGGACAAATGGGCAAGTTTGTGGAATTGGTTTAGCATAACAAAATGGCTATGGTATATAAAAATCTTCATAATGATAGTAGGAGGCTTGATAGGTTTAAGAATAGTTTTTGCTGTGCTTTCGTTAGTAAATAGAGTTAGGCAGGGATATTCACCTCTGTCGTTTCAGACCCTCCTCCCAGCCCCGAGGGGACTCGACAGGCCCGAAGGAATAGAAGAAGAAGGTGGAGAGCAAGGCAGAGGCAGATCCATTCGATTGGTGAACGGATTCTTAGCACTTATCTGGGACGATTTGAGGAACCTGTGCCTCTTCAGCTACCACCACTTGAGAGACTTAGTCTTAATTGCAACGAGGATTGTGGGACTTCTGGGACGCAGGGGGTGGGAAACCCTCAAATATCTGTGGAATCTCCTACAGTATTGGATCCAGGAACTAAAGAATAGTGCTATTAGCTTGCTTGATACTACAGCAATAGCAGTAGCTGAGGGGACAGATAGGGTTATAGAAATAGTACAAAGAGTTATTAGAGCTGTTCTCAACGTACCCACACGAATAAGACAGGGCTTAGAAAGAGCTTTACTATAAAATGGGTGGCAAATGGTCAAAAAGTAGTCTAGTTGGATGGCCTGCTGTAAGGGAAAGAATGAGAAGAACTGTTCCAGCAGCAGCAGGGGTGGGAGCAGTATCTCGGGATCTGGAAAAGCATGGGGCAGTCACAAGTAGCAATACAGCACATACCAATCCTGACTGTGCCTGGCTAGAAGCACAAGAAGAAGAGGAAGTGGGTTTTCCAGTCAAACCTCAAGTACCATTAAGACCAATGACTTACAAGGGAGCTGTAGATCTGAGCCACTTTTTAAAAGAAAAGGGGGGACTGGAAGGGTTAATTTGGTCCCAGAACAGACAAGATATCCTTGATCTTTGGGTCTACCACACACAAGGCTACTTCCCTGATTGGCAAAACTACACACCAGGGCCAGGGGTTAGATATCCACTGACCTTCGGATGGTGCTTCGAGCTAGTACCAGTGGATCCAAAAGAGGTAGAAGAGGGCACTGCAGGAGAGAACAGCTGCTTGTTACACCCTATGTGCCAGCATGGAGCGGAGGACTTGGAGAAAGAAGTGTTAAAGTGGAGATTTAACAGTAGACTGGCATTTGAACATAAAGCCAAAATGCTACATCCGGAGTACTTCAAAGACTGCTGACACCGAGTTTTCTACAAGGGACTTTCCGCTGGGGACTTTCCAGGGAGGAGTCAGGGGCGGGACTGGGAGTGGCTAACCCTCAGATGCTGCATATAAGCAGCTGCTTTTCGCCTGTACTGGGTCTCTCTTGTTAGACCAGATTTGAGCCTGAGAGCTCTCTGGCTAGCTAGGGAACCCACTGCT
>A2.CD.97.97CDKTB48.AF286238_D.YE.01.01YE386.AY795903
TTTTTCGAAGCGAAGTACCAGGGAAGTTCTCTCGACGCAAGACTCGGCTTGCTGAGGTGCACACGGCAAGAGGCGAGAAGCGACGGCTGGTGAGTACGCCTAAAATTTTTGACTAGCGGAGGCTAGAAGGAGAGAGATGGGTGCGAGAGCGTCAGTATTGAGCGGCGGAAAATTAGAAGCTTGGGAGAAAATTCGGTTAAGGCCAGGGGGAAAGAAAAAATATAGACTGAAACATTTAGTATGGGCAAGCAGGGAGCTGGAAAAATTCTCAATCAACCCCAGCCTTTTAGAAACAGAAACAGGATGTAGACGAATATTTGGGCAATTACAACCAGCTCTCGAGACAGGAACAGAAGAACTTAGATCATTATATAATACAATAGCAGTCCTCTACTTTGTTCATCAAAAGATAGAGGTAAAAGACACCAAGGAAGCTCTAGATAAAATAGAGGAAGAACAAAACAAATGCAAGCAGAAGACACAGCAGGCAGCAGCTGACACAGGAAGCAGCAGCAGTCAAAATTACAGAGGTAGCAGCAGTCAAAATTACCCTATAGTGCAAAATGCACAAGGGCAAATGGTACACCAGGCCGTGTCACCTAGGACTTTGAATGCATGGGTCAAAGTAGTTGAAGAGAAGGCTTTTAGCCCAGAAGTAATACCCATGTTTACAGCATTATCAGAAGGAGCCACCCCACAAGACTTAAATACTATGCTAAACACAGTGGGGGGACATCAAGCAGCTATGCAAATGTTAAAAGATACCATCAATGAGGAAGCTGCAGAATGGGACAGGTTACATCCAGTACAGGCAGGGCCTATTCCACCAGGCCAGATGAGAGAACCAAGGGGAAGTGACATAGCGGGAGCTACTAGTAACCTTCAGGAACAAATAGGATGGATGACCAGCAACCCACCTATTCCAGTGGGAGAAATCTATAAAAGATGGATAATCCTGGGATTAAATAAAATAGTAAGAATGTATAGCCCTGTCAGCATTTTGGACATAAAACAAGGGCCAAAAGAACCCTTTAGAGACTATGTAGATAGGTTCTTTAAAACTCTCAGAGCTGAGCAAGCTACACAGGAGGTAAAAAATTGGATGACAGACACCTTGCTGGTCCAAAATGCAAACCCAGATTGTAAATCCATCTTGAGGGCATTAGGACCAGGGGCTACATTAGAAGAAATGATGACAGCATGTCAGGGAGTGGGAGGACCCGGCCATAAAGCAAGGGTTTTAGCTGAAGCAATGAGCCAAGTACAAAATACAAACATAATGATACAGAGAGGCAATTTTAAGGGTCAAAAAAGAATTAAGTGTTTCAACTGTGGCAAGGAAGGACACCTAGCTAGAAATTGCAGGGCCCCTAGGAAAAAGGGCTGCTGGAAATGTGGGAAGGAAGGACATCAAATGAAAGACTGCACTGAGAGACAGGCTAATTTTTTAGGGAAAATTTGGCCTTCCAACAAAGGGAGGCCAGGGAATTTTCCTCAGAGCAGGACAGAGCCAACAGCCCCACCAATGGAGGAAGAGATAACCTCCTCGCTGAAGCAGGAGAACAGGGAGCCGTCCACCCCTGCAATTTCCCTCAAATCACTCTTTGGCAACGACCTCTTGTCACAGTGAAAATAGAAGGACAGCTAAGAGAAGCTTTATTAGATACAGGAGCAGATGATACAGTGTTAGAAGACATAAATCTGCCATGGAAATGGAAACCAAAAATGATAGGGGGAATTGGAGGTTTTATCAAAGTAAGACAATATGATCAGATAGTTATAGAAATTTGTGGAAAAAGGGCTATCGGTACAGTATTAGTAGGACCTACACCTGTCAACATAATTGGAAGAAATATGTTGGTTCAGCTTGGTTGTACTCTAAATTTTCCAATTAGTCCTATTGAAACTGTACCAGTAAAATTGAAGCCAGGAATGGATGGTCCAAAGGTCAAACAATGGCCATTGACAGAAGAAAAAATAAAAGCATTAACAGAAATTTGTAAAGAAATGGAAAAGGAAGGGAAAATTTCAAAAATTGGGCCTGAAAATCCATACAACACTCCAGTGTTTGCTATAAAGAAAAAAGACAGCGATAAATGGAGAAAATTAGTAGATTTCAGAGAACTCAATAAGAGAACTCAAGACTTCTGGGAAGTTCAGTTAGGAATACCACACCCAGCGGGATTAAAAAAGAAAAAATCAGTAACAGTATTAGATGTGGGGGACGCATATTTTTCCGTTCCCCTACATGAAGACTTCAGGAAATATACTGCATTCACCATACCTAGTATAAACAATGAGACACCAGGAATTAGGTATCAGTACAATGTACTTCCACAGGGATGGAAAGGATCACCAGCAATATTCCAGAGTAGCATGACAAAAATCCTAGATCCCTTTAGGGCAAGAAATCCAGAGATGGTCATCTACCAATACATGGATGACTTGTATGTAGGATCTGATTTAGAAATAGATCAGCATAGAGCAAAAATAGAGGAGTTAAGGGCTCATTTATTAAGATGGGGATTTACTACACCAGACAAAAAGCATCAGAAAGAACCTCCATTTCTGTGGATGGGATATGAGCTTCATCCTGACAAGTGGACAGTCCAGCCTATAAAGCTGCCAGAAAAAGACAGCTGGACTGTCAATGATATACAGAAATTAGTAGGAAAGTTAAATTGGGCAAGTCAGATTTATGCAGGGATTAAAGTAAGGCAACTGTGTAAACTCCTTAGAGGAACCAAAGCATTAACAGACATAGTACCACTGACTAGAGAAGCAGAATTAGAATTGGAAGAGAACAGGGAGATTCTAAAAGACCCTGTACATGGGGTATATTATGACCCATCAAAAGACTTAATAGCAGAAATACAGAAACAAGGGCAAGGCCAATGGTCATATCAAATTTATCAAGAACCATTTAAAAATCTAAAAACAGGGAAATATGCAAAAAGGAAGTCCACCCACACCAATGATGTAAAACAATTAACAGAAGCAGTACAAAAAATAGCCACAGAAAGCATAGTAATATGGGGAAAGATTCCTAAATTTAGACTACCCATACAAAAAGAAACATGGGAGACATGGTGGACGGAGTGGTGGCAGGCTACCTGGATTCCTGAGTGGGAGTTTGTCAATACCCCTCCTCTAGTAAAACTATGGTACCAGTTAGAAACAGAACCCATAGCAGGAGCAGAAACTTTCTATGTAGATGGGGCAGCTAATAGAGAGACTAAACTAGGAAAGGCAGGGTATGTCACTGATAGAGGAAGACAAAAAATTGTCCCCTTGACAGAGACAACAAATCAAAAGACTGAATTACATGCAATCTATTTGGCTTTACAGGATTCAGGGTCAGAAGTAAACATAGTAACAGATTCACAGTATGCATTAGGAATCATTCAAGCGCAACCAGATAGCAGTGAATCAGAGTTAGTCAATCAAATAATAGAAAAGTTAATAGAAAAGGAAAGGGTCTACCTGTCATGGGTACCAGCACACAAAGGGATTGGAGGAAATGAACAGGTGGATAAATTAGTCAGTTGTGGAATCAGAAAAGTGTTATTTTTAGATGGGATAGATAAGGCTCAAGAAGAACATGAAAAATATCACAGTAATTGGAGAGCAATGGCTCATGACTTTAATCTGCCACCTATAGTAGCCAAAGAAATAGTAGCCAGCTGTGATAAATGGTCAGGCTAAAAGGGGAAGCCATGCATGGACAAGTAGACTGCAGTCCAGGAATATGGCAACTAGATTGCACACATCTAGAAGGAAAAATTATCGTGGTAGCAGTCCATGTAGCCAGTGGCTATATAGAAGCAGAAGTCATCCCAGCAGAGACAGGACAGGAGACAGCATACTTTCTATTAAAATTAGCAGGAAGATGGCCAGTAAAAGTAATACATACAGACAATGGGCCCAATTTCACCAGTGCAGCAGTTAAGGCAGCCTGTTGGTGGGCAGATGTCAAACAGGAATTTGGGATTCCCTACAATCCCCAAAGTCAAGGAGTAGTGGAATCTATGAATAAAGAATTAAAGAAAATCATAGGGCAGGTAAGAGATCAAGCTGAACATCTTAAGACAGCAGTGCAAATGGCAGTGTTCATCCACAATTTTAAAAGAAAAGGGGGGATTGGGGGATACAGTGCAGGGGAAAGAATAATAGACATAATAGCAACAGATATACAAACTAAAGAATTACAAAAACAAATCATAAAAATTCAAAATTTTCGGGTTTATTACAGGGACAGCAGAGATCCAATTTGGAAAGGACCAGCAAAACTCCTTTGGAAAGGTGAAGGGGCAGTAGTAATACAAGACAATGGTGATATAAAAGTAGTACCAAGAAGAAAAGCAAAGATCATTAGGGATTATGGAAAACAGATGGCAGGTGATGATTGTGTGGCAGGTAGACAGGATGAGGATTAGAACATGGAACAGTCTAGTAAAACATCATATGTATGTGTCAAAGAAAGCTAGAGAGTGGTTCTATAGACATCACTATGAAAGCAGACATCCAAGAGTAAGTTCAGAAGTACACATCCCGCTAAAGGAGGCTAGATTAATAGTAAGAACATATTGGGGTCTGCACCCAGGAGAAAAAGACTGGCACTTGGGTCATGGGGTCTCCATAGAATGGAGGCAGGGAAGGTACAGTACACAAATAGACCCTGATCTGGCAGACCATCTAATCCATCTGTATTATTTTGACTGTTTTTCAGAATCTGCCATAAGGAGAGCCATATTAGGAGAAATAGTTAGGCCTAGATGTGAATATCAAGCAGGACATAATAAGGTAGGGTCTCTGCAATATTTGGCATTGAGAGCATTAGTAGCTTCAACAAGGACAAAGCCACCTTTGCCTAGTGTTAGGAAATTAGTAGAGGATAGATGGAACAAGCCCCAGAAGACCAGGGGCCACCGAGGGAGCCACACAATGAATGGGTGTTAGAACTGTTAGAGGAGCTAAAGCAAGAAGCAGTTAGACATTTCCCTAGGCCGTGGCTACATGGCCTGGGACAACATATCTATAATACCTATGGGGATACTAGGGAGGGAGTTGAAGCTATAGTAAGAATTTTGCAACAACTACTGTTTGTTCATTTCAGAATTGGGTGCCAACATAGCAGAATAGGCATTATTCCAAGAAGAAGAGTAAGGGATGGAGCCAGTAGACCCTAACTTAGAGCCCTGGAACCATCCGGGAAGCCAGCCTAAAACTGCTTGTAACAATTGCTATTGTAAAAAGTGTTGCTATCATTGCCAAAGGTGCTTTCTAAACAAAGGCTTAGGCATCTCCTATGGCAGGAAGAAGCGGAGACCCCGACGAGGACCTGATCAGGGCAATACGGATCATCAAAATCCTGTACCAAAGCAGTAAGTAGTAGTAATCAATATAGGTAATGTCACCTTTAGCAATACTGTCAATAGTAGGACTGGTAGTAGCATCAATTTTAGCAATAGTTGTGTGGACTGTAGTATTTATAGAATATAGAAAGATTAAGAAGCAAAGGAAAATAGACTGGTTACTTGAGAGAATAAGTGAAAGAGCAGAAGACAGTGGCAACGAGAGTGATGGGGACACAGAGGAATTGTCAAAAATGGTGGGAATGGGGAATCTTGGTTTTTGGGATGATAATGATGTGTAAGGCTGCAGATTTGTGGGTCACAGTATACTATGGAGTACCTGTGTGGAGAGATGCAGATACCACCCTATTTTGTGCATCAGACGCTAAAGCATATGCTACAGAAAAGCATAATGTCTGGGCCACACATGCCTGTGTACCCACAGACCCCAACCCACAAGAAGTAAACCTGGCAAATGTAACAGAAGATTTTAACATGTGGAAAAATAACATGGTAGAGCAGATGCATGCAGATATAATCAGTCTATGGGATCAAAGCCTAAAGCCATGTGTAAAATTAACCCCTCTCTGCGTCACTTTAAATTGTAGCAATGCCAACACCACTAACACCAATAGCACTGAAGAAATAAAAAACTGCTCTTACAATATGCCCACAGAACTAAAAGATAAAACACAGAAAGTCTATTCACTGTTTTATGAACTTGATGTAGTACTACTTAATAGAAGTAAGAATAGTAGTTATAGTACTTATAGACTAATAAGTTGTAATACCTCAGTCATCACACAAGCTTGTCCAAAGGTATCCTTTGAGCCAATTCCTATACATTATTGTGCCCCAGCTGGTTATGCGATTCTAAAGTGTAAGGATAAGGAATTCAATGGAAAAGGGTCATGCAGTAATGTTAGCTCAGTACAATGTGCACATGGAATTAGGCCAGTAGCATCAACTCAACTGCTGCTGAATGGCAGTCTAGCAGAAGGAAAGGTAATGATTAGATCTGAAAATATTACAGACAATGCCAAAAACATAATAGTACAGTTTAATAAACCTGTACCAATTAATTGTACCAGACCCAACAACAATACAAGAAAAAGTATACGCTTTGGACCAGGACAGGCCTTCTATACAAATAATAACATAATAGGGGATATAAGACAAGCACATTGTAATATCAGCATAACAGAATGGAATGCCACTCTAAAAAAGGTAGTTGAACAATTAAGAGAACACTTCCCTAATAAAACAATAATCTTTAATAGCTCCTCAGGAGGGGACCTAGAAATTACAACACATAGTTTTAATTGTGGAGGAGAATTTTTCTATTGCAATACAACAGGCCTGTTTAATAGCACATGGGAAAATGGCACTAACAAACAGAATTACACGGAGTCAAATGACACTATAACGCTCCAATGCAGAATAAAACAAATTATAAACATGTGGCAGAGAGTAGGCCGAGCAATGTATGCCCCTCCCATTGCAGGAGTAATAAAGTGTACATCAAACATTACAGGAATGATATTGACAAGAGACGGTGGGAAGAACAGTATTAATGAGACCTTCAGACCTGGAGGAGGAGATATGAGGGACAATTGGAGAAGTGAATTATATAAGTATAAAGTAGTAAAAATTGAACCACTAGGAATAGCACCCACAGAGGCAAGGAGAAGAGTGGTGCAGAGAGAAAAAAGAGCAGTTGGATTGGGAGCTGTTTTCCTTGGGTTCTTGGGAGCAGCAGGAAGCACTATGGGCGCGGCGTCAATAACGCTGACGGTACAGGCCAGACAATTATTGACTGGCATAGTGCAACAGCAAAATAATTTGCTGAGGGCTATAGAGGCGCAACAGCACCTGTTGCAACTCACAGTCTGGGGCGTTAAACAGCTCCAGGCAAGAGTCCTGGCTGTGGAAAGCTACCTAAAGGATCAACAGCTCCTAGGAATTTGGGGTTGCTCTGGAAAACACATTTGCACCACTAATGTGCCCTGGAACTCTAGCTGGAGTAATAAAACTCTAGATGAGATTTGGGGTAAAATGACCTGGAGGCAGTGGGAAAAAGAAATTGACAATTACACAGGAGTAATATACAGCTTAATTGAAGAATCGCAAACCCAGCAAGAAAAAAATGAACAAGAACTATTGCAATTGGATAAATGGGCAAGTTTGTGGAATTGGTTTGACATATCAAATTGGCTGTGGTATATAAGATTATTTATAATGATAGTAGGAGGCTTGATAGGTTTAAGGATAGTTTTTGCTGTGCTTTCTTTAGTAAAAAAAGTTAGGCAGGGATATTCACCTCTGTCATTTCAGACCCTCCTCCCAGCCCCGAGGGGACCCGACAGGCCCGAAGGAATAGAAGAAGAAGGTGGAGAGAGAGACAGAGGCAGATCCATTCGATTGGTGAACGGATTCTCAGCACTTATCTGGGACGATCTGAGGAACCTGTGCCTCTTCAGCTACCACCGCTTGAGAGACTTAATCTTAATTGCAACGAGGATTGTGGAGCTTCTGGGACGCAGGGGGTGGGAAGCCATCAAGTACCTGTGGAACCTTCTGCAGTATTGGATTCAGGAACTAAAGAATAGTGCTATTAGTTTGTTTAATACCACAGCAATAGTAGTAGCTGAAGGGACAGATAGGATCATAGAAATAGCACAAAGAGTTGGTAGAGCTATTATTCACATACCCAGAAGAATAAGACAGGGCTTGGAAAGGTTTTTACTATAAAATGGGTGGCAAATGGTCAAAAAGTAGTATAGTTGGATGGCCTGCTATAAGGGAAAGAATAAGAAGAACTGAACCAGCAGCAGAAGGGGTGGGAGCAGCATCTCGGGACCTGGAAAAACATGGGGCAATCACAAGTAGCAATACAGCACAGACTAATAGTGACTGTGCCTGGCTAGAAGCACAAGAAGAGGATAATGCAGTAGGTTTTCCAGTCAGACCTCAGGTACCATTAAGACCAATGACTTACAAAGGAGCTTTAGATCTAAGTCACTTTTTAAAAGAAAAGGGGGGACTGGAAGGGTTAATTTGGTCCCCGAAAAGACAAGAGATCCTTGATCTTTGGATCTACCACACACAAGGCTACTTCCCTGATTGGCAAAACTACACACCAGGGCCAGGGATTAGATATCCACTGACCTTTGGATGGTGCTTCGAGCTAGTACCAGTTGATCCAAAGGAGGTAGAAGAGGACACTGAAGGAGAGAACAGCTGCTTGTTACACCCTATGTGCCAGCATGGAATGGAGGACCAAGAGAAAGAAGTATTAATGTGGAGATTTAACAGCAAGCTAGCATTTGAACACAAGGCCAAAATGCTGCATCCGGAGTTCTACAAAGACTGCTGACACAGAAGTTGCTGACAGGGACTTTCCGCTGGGGACTTTCCAGGGGAGGTGTGGTTTGGGCGGAGTTGGGGAGTGGCTAACCCTCAGATGCTGCATATAAGCAGCTGCTTTTGCCTGTACTGGGTCTCTCTTGTTAGACCAGATTTGAGCCTGAGAGCTCTCTGGCTAGCTAGGGAACCCACTGCTTAA
>A2.CD.97.97CDKTB48.AF286238_F1.BR.93.93BR020_1.AF005494
TTTTTCGAAGCGAAGTACCAGGGAAGTTCTCTCGACGCAAGACTCGGCTTGCTGAGGTGCACACGGCAAGAGGCGAGAAGCGACGGCTGGTGAGTACGCCTAAAATTTTTGACTAGCGGAGGCTAGAAGGAGAGAGATGGGTGCGAGAGCGTCAGTATTGAGCGGCGGAAAATTAGAAGCTTGGGAGAAAATTCGGTTAAGGCCAGGGGGAAAGAAAAAATATAGACTGAAACATTTAGTATGGGCAAGCAGGGAGCTGGAAAAATTCTCAATCAACCCCAGCCTTTTAGAAACAGAAACAGGATGTAGACGAATATTTGGGCAATTACAACCAGCTCTCGAGACAGGAACAGAAGAACTTAGATCATTATATAATACAATAGCAGTCCTCTACTTTGTTCATCAAAAGATAGAGGTAAAAGACACCAAGGAAGCTCTAGATAAAATAGAGGAAGAACAAAACAAATGCAAGCAGAAGACACAGCAGGCAGCAGCTGACACAGGAAGCAGCAGCAGTCAAAATTACAGAGGTAGCAGCAGTCAAAATTACCCTATAGTGCAAAATGCACAAGGGCAAATGGTACACCAGGCCGTGTCACCTAGGACTTTGAATGCATGGGTCAAAGTAGTTGAAGAGAAGGCTTTTAGCCCAGAAGTAATACCCATGTTTACAGCATTATCAGAAGGAGCCACCCCACAAGACTTAAATACTATGCTAAACACAGTGGGGGGACATCAAGCAGCTATGCAAATGTTAAAAGATACCATCAATGAGGAAGCTGCAGAATGGGACAGGTTACATCCAGTACAGGCAGGGCCTATTCCACCAGGCCAGATGAGAGAACCAAGGGGAAGTGACATAGCGGGAGCTACTAGTAACCTTCAGGAACAAATAGGATGGATGACCAGCAACCCACCTATTCCAGTGGGAGAAATCTATAAAAGATGGATAATCCTGGGATTAAATAAAATAGTAAGAATGTATAGCCCTGTCAGCATTTTGGACATAAAACAAGGGCCAAAAGAACCCTTTAGAGACTATGTAGATAGGTTCTTTAAAACTCTCAGAGCTGAGCAAGCTACACAGGAGGTAAAAAATTGGATGACAGACACCTTGCTGGTCCAAAATGCAAACCCAGATTGTAAATCCATCTTGAGGGCATTAGGACCAGGGGCTACATTAGAAGAAATGATGACAGCATGTCAGGGAGTGGGAGGACCCGGCCATAAAGCAAGGGTTTTAGCTGAAGCAATGAGCCAAGTACAAAATACAAACATAATGATACAGAGAGGCAATTTTAAGGGTCAAAAAAGAATTAAGTGTTTCAACTGTGGCAAGGAAGGACACCTAGCTAGAAATTGCAGGGCCCCTAGGAAAAAGGGCTGCTGGAAATGTGGGAAGGAAGGACATCAAATGAAAGACTGCACTGAGAGACAGGCTAATTTTTTAGGGAAAATTTGGCCTTCCAACAAAGGGAGGCCAGGGAATTTTCCTCAGAGCAGGACAGAGCCAACAGCCCCACCAATGGAGGAAGAGATAACCTCCTCGCTGAAGCAGGAGAACAGGGAGCCGTCCACCCCTGCAATTTCCCTCAAATCACTCTTTGGCAACGACCTCTTGTCACAGTGAAAATAGAAGGACAGCTAAGAGAAGCTTTATTAGATACAGGAGCAGATGATACAGTGTTAGAAGACATAAATCTGCCATGGAAATGGAAACCAAAAATGATAGGGGGAATTGGAGGTTTTATCAAAGTAAGACAATATGATCAGATAGTTATAGAAATTTGTGGAAAAAGGGCTATCGGTACAGTATTAGTAGGACCTACACCTGTCAACATAATTGGAAGAAATATGTTGGTTCAGCTTGGTTGTACTCTAAATTTTCCAATTAGTCCTATTGAAACTGTACCAGTAAAATTGAAGCCAGGAATGGATGGTCCAAAGGTCAAACAATGGCCATTGACAGAAGAAAAAATAAAAGCATTAACAGAAATTTGTAAAGAAATGGAAAAGGAAGGGAAAATTTCAAAAATTGGGCCTGAAAATCCATACAACACTCCAGTGTTTGCTATAAAGAAAAAAGACAGCGATAAATGGAGAAAATTAGTAGATTTCAGAGAACTCAATAAGAGAACTCAAGACTTCTGGGAAGTTCAGTTAGGAATACCACACCCAGCGGGATTAAAAAAGAAAAAATCAGTAACAGTATTAGATGTGGGGGACGCATATTTTTCCGTTCCCCTACATGAAGACTTCAGGAAATATACTGCATTCACCATACCTAGTATAAACAATGAGACACCAGGAATTAGGTATCAGTACAATGTACTTCCACAGGGATGGAAAGGATCACCAGCAATATTCCAGAGTAGCATGACAAAAATCCTAGATCCCTTTAGGGCAAGAAATCCAGAGATGGTCATCTACCAATACATGGATGACTTGTATGTAGGATCTGATTTAGAAATAGATCAGCATAGAGCAAAAATAGAGGAGTTAAGGGCTCATTTATTAAGATGGGGATTTACTACACCAGACAAAAAGCATCAGAAAGAACCTCCATTTCTGTGGATGGGATATGAGCTTCATCCTGACAAGTGGACAGTCCAGCCTATAAAGCTGCCAGAAAAAGACAGCTGGACTGTCAATGATATACAGAAATTAGTAGGAAAGTTAAATTGGGCAAGTCAGATTTATGCAGGGATTAAAGTAAGGCAACTGTGTAAACTCCTTAGAGGAACCAAAGCATTAACAGACATAGTACCACTGACTAGAGAAGCAGAATTAGAATTGGAAGAGAACAGGGAGATTCTAAAAGACCCTGTACATGGGGTATATTATGACCCATCAAAAGACTTAATAGCAGAAATACAGAAACAAGGGCAAGGCCAATGGTCATATCAAATTTATCAAGAACCATTTAAAAATCTAAAAACAGGGAAATATGCAAAAAGGAAGTCCACCCACACCAATGATGTAAAACAATTAACAGAAGCAGTACAAAAAATAGCCACAGAAAGCATAGTAATATGGGGAAAGATTCCTAAATTTAGACTACCCATACAAAAAGAAACATGGGAGACATGGTGGACGGAGTGGTGGCAGGCTACCTGGATTCCTGAGTGGGAGTTTGTCAATACCCCTCCTCTAGTAAAACTATGGTACCAGTTAGAAACAGAACCCATAGCAGGAGCAGAAACTTTCTATGTAGATGGGGCAGCTAATAGAGAGACTAAACTAGGAAAGGCAGGGTATGTCACTGATAGAGGAAGACAAAAAATTGTCCCCTTGACAGAGACAACAAATCAAAAGACTGAATTACATGCAATCTATTTGGCTTTACAGGATTCAGGGTCAGAAGTAAACATAGTAACAGATTCACAGTATGCATTAGGAATCATTCAAGCGCAACCAGATAGCAGTGAATCAGAGTTAGTCAATCAAATAATAGAAAAGTTAATAGAAAAGGAAAGGGTCTACCTGTCATGGGTACCAGCACACAAAGGGATTGGAGGAAATGAACAGGTGGATAAATTAGTCAGTTGTGGAATCAGAAAAGTGTTATTTTTAGATGGGATAGATAAGGCTCAAGAAGAACATGAAAAATATCACAGTAATTGGAGAGCAATGGCTCATGACTTTAATCTGCCACCTATAGTAGCCAAAGAAATAGTAGCCAGCTGTGATAAATGGTCAGGCTAAAAGGGGAAGCCATGCATGGACAAGTAGACTGCAGTCCAGGAATATGGCAACTAGATTGCACACATCTAGAAGGAAAAATTATCGTGGTAGCAGTCCATGTAGCCAGTGGCTATATAGAAGCAGAAGTCATCCCAGCAGAGACAGGACAGGAGACAGCATACTTTCTATTAAAATTAGCAGGAAGATGGCCAGTAAAAGTAATACATACAGACAATGGGCCCAATTTCACCAGTGCAGCAGTTAAGGCAGCCTGTTGGTGGGCAGATGTCAAACAGGAATTTGGGATTCCCTACAATCCCCAAAGTCAAGGAGTAGTGGAATCTATGAATAAAGAATTAAAGAAAATCATAGGGCAGGTAAGAGATCAAGCTGAACATCTTAAGACAGCAGTGCAAATGGCAGTGTTCATCCACAATTTTAAAAGAAAAGGGGGGATTGGGGGATACAGTGCAGGGGAAAGAATAATAGACATAATAGCAACAGATATACAAACTAAAGAATTACAAAAACAAATCATAAAAATTCAAAATTTTCGGGTTTATTACAGGGACAGCAGAGATCCAATTTGGAAAGGACCAGCAAAACTCCTTTGGAAAGGTGAAGGGGCAGTAGTAATACAAGACAATGGTGATATAAAAGTAGTACCAAGAAGAAAAGCAAAGATCATTAGGGATTATGGAAAACAGATGGCAGGTGATGATTGTGTGGCAGGTAGACAGGATGAGGATTAGAACATGGAACAGTCTAGTAAAACATCATATGTATGTGTCAAAGAAAGCTAGAGAGTGGTTCTATAGACATCACTATGAAAGCAGACATCCAAGAGTAAGTTCAGAAGTACACATCCCGCTAAAGGAGGCTAGATTAATAGTAAGAACATATTGGGGTCTGCACCCAGGAGAAAAAGACTGGCACTTGGGTCATGGGGTCTCCATAGAATGGAGGCAGGGAAGGTACAGTACACAAATAGACCCTGATCTGGCAGACCATCTAATCCATCTGTATTATTTTGACTGTTTTTCAGAATCTGCCATAAGGAGAGCCATATTAGGAGAAATAGTTAGGCCTAGATGTGAATATCAAGCAGGACATAATAAGGTAGGGTCTCTGCAATATTTGGCATTGAGAGCATTAGTAGCTTCAACAAGGACAAAGCCACCTTTGCCTAGTGTTAGGAAATTAGTAGAGGATAGATGGAACAAGCCCCAGAAGACCAGGGGCCACCGAGGGAGCCACACAATGAATGGGTGTTAGAACTGTTAGAGGAGCTAAAGCAAGAAGCAGTTAGACATTTCCCTAGGCCGTGGCTACATGGCCTGGGACAACATATCTATAATACCTATGGGGATACTAGGGAGGGAGTTGAAGCTATAGTAAGAATTTTGCAACAACTACTGTTTGTTCATTTCAGAATTGGGTGCCAACATAGCAGAATAGGCATTATTCCAAGAAGAAGAGTAAGGGATGGAGCCAGTAGACCCTAACTTAGAGCCCTGGAACCATCCGGGAAGCCAGCCTAAAACTGCTTGTAACAATTGCTATTGTAAAAAGTGTTGCTATCATTGCCAAAGGTGCTTTCTAAACAAAGGCTTAGGCATCTCCTATGGCAGGAAGAAGCGGAGACCCCGACGAGGACCTGATCAGGGCAATACGGATCATCAAAATCCTGTACCAAAGCAGTAAGTAGTAGTAATCAATATAGGTAATGTCACCTTTAGCAATACTGTCAATAGTAGGACTGGTAGTAGCATCAATTTTAGCAATAGTTGTGTGGACTGTAGTATTTATAGAATATAGAAAGATTAAGAAGCAAAGGAAAATAGACTGGTTACTTGAGAGAATAAGTGAAAGAGCAGAAGACAGTGGCAACGAGAGTGATGGGGACACAGAGGAATTGTCAAAAATGGTGGGAATGGGGAATCTTGGTTTTTGGGATGATAATGATGTGTAAGGCTGCAGATTTGTGGGTCACAGTATACTATGGAGTACCTGTGTGGAGAGATGCAGATACCACCCTATTTTGTGCATCAGACGCTAAAGCATATGCTACAGAAAAGCATAATGTCTGGGCCACACATGCCTGTGTACCCACAGACCCCAACCCACAAGAAGTAAACCTGGCAAATGTAACAGAAGATTTTAACATGTGGAAAAATAACATGGTAGAGCAGATGCATGCAGATATAATCAGTCTATGGGATCAAAGCCTAAAGCCATGTGTAAAATTAACCCCTCTCTGCGTCACTTTAAATTGTAGCAATGCCAACACCACTAACACCAATAGCACTGAAGAAATAAAAAACTGCTCTTACAATATGCCCACAGAACTAAAAGATAAAACACAGAAAGTCTATTCACTGTTTTATAAACTTGATATAGTACAAATCAACAAGGATGACAATAGAACATACAGACTAATAAATTGTGATGCCTCAACCATTACACAGGCTTGTCCAAAGGTATCTTGGGATCCAATTCCCATACATTATTGTGCTCCAGCTGGTTATGCGATTCTAAAGTGTAATGAGAAAAATTTCACAGGGACAGGGTCATGCAAGAATGTCAGTACAGTACAATGTACACATGGAATTAAACCAGTGGTATCCACTCAATTGTTGTTAAATGGCAGCCTAGCAGAAGGAGAGATAGTAATCAGATCTCAAAATATCTCAGATAATGCAAAAACCATAATAGTGCACCTTAATGAATCTGTACAGATTAATTGTACAAGACCCAACAACAATACAAGAAAAAGAATATCTTTAGGACCAGGACGAGTATTTTATACAACAGGAGAAATAATAGGAGACATCAGAAAGGCACATTGTAACGTTAGTGGAACACAATGGAGGAACACGTTAGCAAAGGTAAAGGCAAAGTTAGGGTCTTATTTCCCTAATGCAACAATAAAATTTAACTCATCCTCAGGAGGGGACCTAGAAATTACAAGGCATAATTTTAATTGTATGGGAGAATTTTTCTACTGTAATACAGATGAACTGTTTAATGACACAAAATTCAATGACACAGGATTCAATGGCACTATCACTCTCCCATGTCGAATAAAACAAATTGTAAACATGTGGCAGGAAGTGGGACGAGCAATGTATGCCAATCCCATTGCAGGAAACATTACCTGTAACTCAAATATTACAGGTCTGCTATTGACAAGAGATGGTGGTCTGAATAGTACTAATGAGACCTTCAGACCTGGGGGAGGAAATATGAAAGACAATTGGAGAAGTGAATTATATAAATATAAAGTAGTAGAAATTGAACCACTAGGAGTAGCACCCACCAAGGCAAAAAGACAAGTGGTGAAGAGAGAAAGAAGAGCAGTGGGACTAGGAGCTCTGTTCCTTGGGTTCTTGGGAGCAGCTGGAAGCACTATGGGCGCGGCGTCAATAACGCTGACGGTACAGGCCAGACAATTATTGTCTGGAATAGTGCAACAGCAGAGCAATCTGCTGAGGGCTATTGAAGCGCAACAGCATCTGTTGCAGCTCACAGTCTGGGGCATTAAACAGCTCCAGGCAAGAGTCCTGGCTGTGGAAAGATACCTAAAGGATCAACAGCTCCTAGGGCTTTGGGGCTGCTCTGGAAAACTCATCTGCACCACTAATGTGCCCTGGAACTCTAGTTGGAGTAATAAATCTCTTGAGGAGATTTGGGGGAACATGACCTGGATGGAGTGGGAAAAAGAGGTTAGCAATTACTCAAAAGAAATATACAGGTTAATTGAAGACTCGCAGAACCAGCAGGAAAAGAATGAACAAGAATTATTAGCATTGGACAAATGGGCAAGTCTGTGGAATTGGTTTGACATAACACAGTGGCTGTGGTATATAAAAATATTCATAATGATAGTAGGAGGCTTGATAGGCTTAAGAATAGTTTTTACTGTGCTTTCTATAGTAAATAGAGTTAGGAAGGGATACTCACCTTTGTCATTTCAGACCCATATCCCAAGCCCGAGGGAACCCGACAGGCCCGAAGGAATCGAAGAAGGAGGTGGAGAGCAAGGCAAAGACAGATCCGTGAGATTAGTGACCGGATTCTTAGCTCTTGCCTGGGACGACCTGCGGAACCTGTGCCTCTTCAGCTACCGCCACTTGAGAGACTTCATATTAATTGCAGCGAGGATTGTGGACAGGGGGCTGAAGAGGGGGTGGGAAGCTCTCAAATATCTGGGGAATCTCACACAGTATTGGGGTCAGGAACTAAAGAATAGTGCTATTAGCTTGCTTAATGCCACAGCAATAGCAGTAGCTGAGTGGACAGATAGAGTTATAGAAGCTTTGCAAAGAGCTGGTAGAGCTATTCTCAACATACCTAGAAGAATAAGACAGGGCTTGGAAAGGGCTTTGCTATAAAATGGGTGGCAAGTGGTCAAAAAGTAGTATAGTTGGATGGCCTGCTATAAGGGAAAGAATGAGGCGAACCCCTCCAACCCCTCCAGCAGCAGAGGGGGTGGGAGCAGTGTCTCAAGACTTAGAAAGACGGGGGGCAATTACAAGCAGCAATACTAGAGCTAATAATCCTGACTTGGCCTGGCTGGAAGCACAAGAGGAAGACGAAGTAGGCTTTCCAGTCAGACCTCAGGTACCTTTAAGACCAATGACCTATAAGGGAGCTGTAGATCTCAGTCACTTTTTAAAAGAAAAGGGGGGACTGGAAGGGTTAATTTACTCCAAGAGAAGACAAGAGATCCTTGATCTGTGGGTCTACCACACACAAGGCTACTTCCCTGATTGGCAGAACTACACACCAGGGCCAGGGATCAGATATCCACTGACCATGGGGTGGTGCTTCAAGCTAGTACCAGTTGACCCAGAGGAGGTAGAAAAGGCCAATGAAGGAGAGAACAACTGCTTGCTACACCCCATGAGCCAACATGGAATGGAGGATGAAGACAAAGAAGTACTGAAATGGGAGTTTGACAGCCGCTTGGCACTGAGACACATAGCCAGAGAGAGACATCCGGAGTACTACCAAGACTGAGACTGCTGACACAGAGATTGCTGACACAGAAGAATCTAAAGGGACTTTCCACTGGGGACTTTCCAGAGGGTGGGCCAGAGGGCGGGACTGGGGAGTGGCTCACCCTCAGATGCTGCATATAAGCAGCCGCTTTTCGCCTGTACTGGGTCTCTCTAGTTAGACCAGATTTGAGCCCGGGAGCTCTCTGGCTAGCTAGGGAACCCACTGCTTAAGCCTCAATAAAGCTTGCCTTGAGTGCTTT
>A2.CY.94.94CY017_41.AF286237_F2.CM.95.MP257.AJ249237
TTGAAAAGCGAAAGTAACAGGGACTCGAAAGCGAAAGTTCCAGAGGAGTTCTCTCGACGCAGGACTCGGCTTGCTGAGGTGCACACGGCAAGAGGCGAGGGGCGGCGACTGGTGAGTACGCCTAATATTTTTGACTAGCAGAGGCTAGAAGGAGAGAGATGGGTGCGAGAGCGTCAATATTAAGCGGGGGAAAATTAGATGCTTGGGAGAAAATTCGGTTAAGGCCAGGGGGAAAGAAAAAATATAGACTGAAACATTTGGTATGGGCAAGCAGGGAGCTGGAGAAATTCTCAATTAACCCTGGCCTTTTAGAAACACCAGAGGGATGTAGACAAATAATAAGGCAGTTACAACCAGCTCTCCAAACAGGAACAGAAGAACTTAAATCATTATATAATACAGTAGTAGTCCTCTACTGGGTACATCAAAGGGTAGATGTAAAAGACACCAAGGAAGCTCTAGATAAAATAGAGGAAGAACAAAACAAGCAGAAAACACAGCATGCAGCAGCTGACACAGGGAACAGCAGCAGTCAAAATTATCCCATAGTGCAAAATGCACAAGGGCAAATGGTACACCAGGCTATATCACCTAGGACGTTGAATGCCTGGGTCAAAGTAGTAGAAGAAAAGGCTTTCAGCCCAGAAGTAATACCTATGTTTACAGCATTATCAGAAGGAGCCACCCCACAAGACTTAAATACTATGCTAAACACAGTGGGGGGACATCAAGCAGCTATGCAAATGTTAAAAGATACCATCAATGAGGAAGCTGCAGAATGGGACAGGGTACATCCAGTACATGCAGGGCCTATTCCACCAGGCCAGATGAGAGAACCAAGGGGAAGTGACATAGCAGGAACTACTAGTACCCTTCAGGAACAAATAGGTTGGATGACCAGCGATCCACCCATCCCAGTGGGAGAAATTTATAAAAGATGGATAATCCTGGGATTAAATAAAATAGTAAGAATGTATAGCCCTGTCAGCATTTTGGACATAAGACAAGGGCCAAAAGAACCCTTTAGAGATTATGTGGATAGGTTCTTTAAAACTCTAAGAGCTGAGCAAGCCACACAGGAGGTAAAAAACTGGATGACGGACACCTTGCTGGTCCAAAATGCGAACCCAGATTGTAGATCCATCTTGAGAGCATTAGGACCAGGGGCCTCATTAGAAGAAATGATGACAGCATGTCAGGGAGTGGGAGGACCCAGCCATAAAGCAAGGGTTTTGGCTGAAGCAATGAGCCATGTACAAAGTACAAATACAAACATAATGATGCAGAGAGGCAATTTTAGGGGTCAAAAAAGAATTAAGTGTTTCAACTGTGGCAAGGAAGGACACCTAGCCAGAAATTGCAGGGCCCCTAGGAAAAAGGGCTGCTGGAAATGTGGAAAGGAAGGACATCAAATGAAAGATTGCACTGAGAGACAGGCTAATTTTTTAGGGAAAATTTGGCCTTCCAACAAAGGGAGGCCAGGAAATTTTCCTCAGAGCAGAACAGAGCCAACAGCCCCACCAGCAGAGAACTTGAGAATGGGGGAAGAGATAACCTCCTCCCTGAAGCAGGAACTGGAGACCAGGGAACCATACAATCCTGCAATTTCCCTCAAATCACTCTTTGGCAACGACCCCTTGTTACAGTAAAGATAGAGGGACAGCTAAAAGAAGCTCTATTAGATACAGGAGCAGATGATACAGTGTTAGAAGAAATAAATTTGCCAGGAAAATGGAAACCAAAAATGATAGGGGGAATTGGAGGTTTTATCAAAGTAAGACAATATGATCAGATAGCTATAGAAATTTGTGGAAAAAGGGCCATAGGTACAGTATTAGTAGGACCTACCCCTGTCAACATAATCGGAAGAAATATGTTGGTTCAGCTTGGTTGTACTTTAAATTTTCCAATTAGTCCTATTGAAACTGTACCAGTAAAATTAAAGCCAGGAATGGATGGTCCAAAGGTTAAACAATGGCCATTGACAGAAGAAAAAATAAAAGCATTAACAGAAATCTGTAAAGAAATGGAAAAGGAAGGAAAAATTTCAAAAATTGGGCCTGAAAATCCATACAACACTCCAGTGTTTGCTATAAAGAAAAAAGACAGCACTAAATGGAGAAAATTAGTAGATTTTAGAGAACTCAATAAGAGAACTCAAGACTTCTGGGAAGTTCAGTTAGGAATACCACATCCAGCAGGATTAAAAAAGAAAAAAGCAGTAACAGTACTTGATGTGGGGGACGCATATTTTTCCGTTCCCTTACATGAAGACTTCAGAAAATATACTGCATTCACCATACCTAGTACCAACAATGAGACACCAGGAGTTAGGTATCAGTACAATGTACTTCCACAGGGATGGAAAGGATCACCAGCAATATTCCAGAGTAGCATGACAAAGATCTTAGAGCCCTTTAGATCAAAGAATACAGAATTAATCATCTACCAATACATGGATGACTTGTATGTAGGATCTGATTTAGAAATAAGCCAGCATAGAGTAAAAATAGAGGAATTAAGGGCTCACTTATTGAAATGGGGATTTTATACACCAGACAAAAAACATCAGAAAGAACCTCCATTTCTTTGGATGGGATATGAGCTTCATCCTGACAAATGGACAGTCCAGCCTATAAAGCTGCCAGAAAAAGACAGCTGGACTGTCAATGATATACAGAAATTAGTAGGGAAATTAAATTGGGCAAGTCAGATTTATGCAGGGATTAAAGTAAAGCAACTGTGTAAACTCCTTAGAGGAGCCAAAGCACTAACAGACATAGTAACACTGACTAAAGAAGCAGAGTTAGAATTAGAAGAGAACAGGGAAATTTTAAAAACCCCTGTACATGGGGTATACTATGACCCATCAAAAGACTTAATAGCAGAAATACAGAAACAAGGGCAAGACCAATGGACATATCAAATTTATCAGGAACCCTTTAAGAATCTGAAAACAGGGAAATATGCAAAAAGGAGGTCCACCCACACTAATGATATAAAACAGTTAACAGAAGCAGTACAAAAAATAACCATGGAAAGCATAGTGATATGGGGAAAGACTCCTAAATTTAAATTACCCATACAAAAGGAAACATGGGAGACATGGTGGGCGGAGTATTGGCAGGCTACCTGGATTCCTGAGTGGGAGTTTGTCAATACCCCTCCTCTAGTAAAACTGTGGTACCAGTTAGAAAAAGAACCCATAGCAGGAGCAGAAACTTTCTATGTAGATGGGGCAGCTAATAGAGAGACTAAACTAGGAAAGGCAGGGTATGTCACTGACAGAGGAAGACAAAAAATTGTCTCCCTGACGGAGACAACAAATCAAAAGACTGAATTACATGCAATCTATTTGGCTTTACAGGATTCAGGATTAGAAGTGAACATAGTGACAGATTCACAGTATGCATTAGGAATCATTCAAGCACAACCAGAAAGGAGTGAATCAGAGATAGTCAATCAAATAATAGAAAAATTAATAGAAAAGGAAAGGGTCTACCTATCATGGGTACCAGCACACAAAGGGATTGGAGGAAATGAACAAGTAGACAAATTAGTCAGTTCTGGAATCAGGAAAGTGCTATTTTTAGATGGGATAGATAAGGCTCAAGAGGAACATGAAAGATATCACAGCAATTGGAGAGCAATGGCTCATGACTTTAATCTACCACCTGTAGTAGCAAAAGAAATAGTAGCTAGCTGTGATAAATGTCAGCTAAAAGGGGAAGCCATGCATGGACAAGTAGACTGTAGTCCAGGAATATGGCAACTAGATTGCACACATCTTGAAGGAAAAGTTATCCTGGTGGCAGTCCATGTGGCCAGTGGCTATATAGAAGCAGAAGTCATCCCAACAGAAACAGGACAGGATACAGCATACTTTATATTAAAACTAGCAGGAAGATGGCCAGTAAAAGTAATACATACAGACAATGGGCCCAATTTCATCAGTGCAACAGTTAAGGCAGCCTGTTGGTGGGCAGGTATCCAACAAGAATTTGGGATTCCCTACAATCCCCAAAGTCAAGGAGTAGTGGAATCTATGAATAAAGAATTAAAGAAAATCATAGGGCAGGTAAGAGATCAAGCTGAACACCTTAAGACAGCAGTACAAATGGCAGTATTCATTCACAATTTTAAAAGAAAAGGGGGGATTGGGGGATACAGTGCAGGGGAAAGAATAATAGACATAATAGCAACAGATATACAAACTAAAGAACTACAAAGACAAATTACAAAAATTCAAAATTTTCGGGTTTATTACAGGGACAGCAGAGATCCAATTTGGAAAGGACCAGCAAAACTCCTTTGGAAAGGTGAAGGGGCAGTAGTAATACAAGACAATAGTGACATAAAGGTAGTACCAAGAAGAAAAGCAAAGATCATTAGGGATTATGGAAAACAGATGGCAGGTGATGATTGTGTGGCAGGTAGACAGGATGAGGATTAGAACATGGAACAGTTTAGTTAAACATCATATGTATATTTCAAGGAAAGCTAAAGGTTGGGTCTATAAACATCACTATGAAAGCAGAAATCCAAGAATAAGTTCAGAAGTACACATCCCGCTAGGGGAGGCTAGAATAATAGTAAGAACATATTGGGGTCTGCACATAGGAGAAAAAGACTGGCACTTGGGTCATGGAGTCTCCATAGAATGGAGGCAAAACAGGTATCATACACAAATAGACCCTGATCTGGCAGACCATCTAATCCATCTGTATTATTTTGACTGTTTTTCAGAATCTGCCATAAGGAAAGCCATAATAGGAGAAATAGTTAGTCCTAGGTGTGAATATCAAGCAGGACATAACAAGGTAGGGTCTCTGCAATATTTGGCATTGAAAGCAGTAGTAGCTTCAACAAGGACAAAGCCACCTTTGCCTAGTGTTAGGAAATTAGTAGAGGATAGATGGAACAAGCCCCAGAAGACCAAGGGCCACAGAGGGAGCCATACAATGAATGGATGTTAGAACTGTTAGAGGAGCTCAAGCAGGAAGCTGTTAGACATTTCCCTAGGCACTGGCTACATGGCCTAGGACAATACATCTATAATACCTATGGGGATACCTGGGAAGGAGTTGAAGTTATCATAAGATATCTGCAACAACTACTGTTTGTCCATTTCAGAATTGGGTGCCAACATAGCAGGATAGGCATTATTCGAAGAAGAAGAGTAAGGGATGGAGCCAGTAGACCCTAAACTAGAGCCCTGGAACCATCCGGGAAGTCAGCCTAAAACTGCTTGTACCAAATGTTATTGTAAACGCTGTTGCTATCATTGCCAGTTGTGCTTTATAAACAAAGGCTTAGGCATCTCCTACGGCAGGAAGAAGCGACGACCCCGACGAAAGCCTTCTCCAAGCAATAAGGACCATCAAAATCCTATACCAAAGCAGTAAGTAGTAGTAATTAATATATGTAATGTTACCTTTAGTAATATTGGCAATAGTAGGACTGATAGTAGCTTTAATCTTAGCAATAGTTGTATGGACTATAGTATTCATAGAATATAAGAAAATTAAGAAGCAAAGGAAAATAGACTGGTTAATCAAAAGAATAAGTGAGAGAGCAGAAGACAGTGGCAATGAGAGTGATGGGGACACAGAGGAACTATCAGCACTTGTGGAGAGGGGGCATCTTGATTTTGGGGATGTTAATAATGTGTAAAGCTACAGATTTGTGGGTCACAGTATACTATGGAGTACCTGTGTGGAAAGATGCAGATACCATCCTATTTTGTGCATCAGATGCTAAAGCATATGATACAGAAGTGCATAATGTATGGGCCACACATGCCTGTGTACCCACAGACCCCAACCCACAAGAAATAAACCTGGAAAATGTAACAGAAAATTTTAATATGTGGAAAAATAACATGGTAGAGCAGATGCAAGAAGATATAATCAGCTTATGGGATCAAAGCCTAAAGCCATGTGTAAAATTAACCCCGCTCTGCGTCATTTTAAATTGTAGCAATGCCAATACCAGCACCCATAGCAATAGCAGTAGCACCCAGAGCCCCATTAATGAAGAAATAAAAAACTGCTCTTACAATACTACCACAATACTAAGAGATAAGACACAAAAAGTTTATTCACTGTTTTATAGACTTGATGTAGTACAACTTGATGAAAGTGAAAATAAGAATACATCAGGTAGTAATACTCTGTATAGACTAATAAATTGTAATACCTCAACCATCACACAAGCGTGTCCAAAGGTAACCTTTGAGCCAATTCCTATACATTATTGTGCCCCAGCTGGTTTTGCGATTCTAAAGTGTAAGGATCCGAGATTCAATGGAACAGGGTCATGCAAGAATGTTAGCTCAGTACAATGTACACATGGAATTAAACCAGTAGCATCAACTCAACTGCTGTTGAATGGCAGTCTAGCAGAAGGAGGGAAAATAATGATTAGATCTGAAAATATTACAAACAATGCCAAAAACATAATAGTTCAGTTTACTAAGCCTGTACTAATTACTTGTATCAGACCCAACAACAATACAAGAAAAAGTATACGCTTTGGACCAGGACAAGCCTTCTATACAAATGAAATAATAGGGGACATAAGACAAGCACATTGTAATATCAACAAAACATTATGGAATGACACTTTACAAAAGGTAGCTGAACAATTAAGAGAGAAATTCCCTAAGAAAACCATAATCTTTACTAACTCCTCAGGAGGGGACCCAGAAATTACAACACTTAGTTTTAATTGTGCAGGAGAATTTTTCTATTGCAATACAACAGGCCTGTTTAATGGTACGTGGTGGAACAATGGTACGTGGAACGGGCCCTACACACCTAATAACACCAATGGAAGTATAATCCTCCCATGCAGAATAAAACAAATTATAAACATGTGGCAGAGAGTAGGAAGAGCAATGTATGCCCCTCCCATTGCAGGAATAATAAAGTGTACATCAAACATTACAGGAATAATATTGACAAGAGATGGTGGTAACAATGGGACTAATGAGACCTTCAGACCTGGAGGGGGAGATATGAGAGACAATTGGAGAAGTGAACTATATAAATATAAGGTAGTAAAAATTGAACCACTAGGAGTAGCACCCACCAAGGCAAAAAGACAAGTGGTGCAGAGAGAAAAAAGAGCAGTGGGAATGGGAGCTATGTTCCTTGGGTTCTTGGGAGCAGCCGGAAGCACTATGGGCGCGGCGTCAATAACGCTGACGGTACAGGCCAGAAACTTATTGTCTGGTATAGTGCAGCAGCAAAGCAATTTGCTGAAAGCTATTGAAGCGCAACAGCATCTGTTGCAGCTCACAGTCTGGGGCATTAAACAGCTCCAGGCGAGAATCCTGGCTGTGGAAAGATACCTAAAGGACCAACAGCTCCTAGGGATTTGGGGCTGCTCTGGAAAACTCATCTGCCCAACTACTGTGCCTTGGAATCTTAGTTGGAGTAATAAATCTCAAGATGAAATTTGGGGAAACATGACATGGATGGAATGGGAAAAGGAGATTGGCAATTACACAGACACAATATACAGATTAATTGAAAGTGCACAAAATCAGCAGGAAAAGAATGAACAGGACTTATTGGCATTGGACAAGTGGGACAATCTGTGGAATTGGTTTTCTATAACAAGATGGTTGTGGTACATAGAAATATTCATAATGATAATAGGAAGCTTGATAGGATTAAGAATAGTTTTTACTGTGCTTTCTATAATAAATAGAGTTAGGCAGGGATACTCACCTTTGTCATTGCAGACCCTTATCCCAAACTCGAGGGGACCCGAAAGGCCCGGAGGAATCGAAGAAGAAGGTGGAGAGCAAGACAAAGACAGATCCATCAGATTAGTGAGCGGATTCTTAGCACTTGCCTGGGACGACTTCAGGAGCCTGTGCGTCTTCAGCTACCACTGCTTGAGAAACTTCATATTAATTGCAGCGAGGACTGTGGACAAGGGACTGAAAAGGGGGTGGGAAGTCCTCAAATATCTGTGGAATCTCGCGCAGTATTGGGGTCAGGAACTAAAGAATAGTGCTATTAGTCTGTTGGATAGAACAGCAATAGCAGTAGCTGAAGGAACAGATAGAATCATAGAAATTTTGCAAAGAGCTGGTAGAGCTGTTCTCAACATACCTAGAAGAATAAGACAGGGTCTTGAAAGAGCTTTGCTATAAAATGGGTGGCAAGTGGTCAAAAAGTAGTATAGTTGGATGGCCTGCTATAAGGGAAAGAATAAGAGCAGCAGAAGGGGTAGGAGCAGTGTCTCAAGACTTAGATAAACGTGGGGCAATTACAAACAGCAATACTGGGGCTACTAATGCTGACTTGGCCTGGCTAGAAGCGCAAGAGGAGGAAGTAGGTTTTCCAGTCAGACCTCAGGTACCTTTAAGACCAATGACTTATAAGGCAGCCCTGGATCTCAGTCACTTTTTAAAAGAAAAGGGGGGACTGGAAGGGTTAATTTACTCCAGGAAAAGACAAGAAATTCTTGATTTGTGGGTCTACCACACACAAGGCTACTTCCCTGATTGGCAGAACTACACACCAGGGCCAGGGCCCAGATTTCCACTGACCTTTGGATGGTGCTTCAAGCTAGTACCAGTTGATCCAGAGGAGGTAGAAAAGGCCAATGAAGGAGAGAACAACTGTTTGTTACACCCTATGAGCCTACATGGAATGGAGGATGACGACAAGGAAGTGTTAAAGTGGCAGTTTGACAGCCGCCTAGCGCTGAGACATATAGCCAGAGAGAGACATCCGGAGTACTACAAAGAC
>A2.CD.97.97CDKS10.AF286241_G.NG.01.01NGPL0669.DQ168576
AGCTATAAGAGAGACTTAATTAGGAAAAGCAGGATTTGTCACTGACAGAGGAAGACAAAAAATTGTCTCCCTGACGGAGACAACAAATCAAAAGACTGAATTACATGCAATCTATTTAGCTTTACAGGATTCAGAATTAGAAGTAAACATAGTAACAGATTCACAGTATGCATTAGGAATCATTCAGGCACAACCAGATAGGAGTGAATCAGAGTTAGTCAATCAAATAATAGAAAAGTTAATAGAAAAAGAGAGGGTCTACCTGTCATGGGTACCAGCACACAAGGGGATTGGAGGAAATGAACAGGTAGACAAATTAGTCAGTTCTGGAATCAGGAAAGTGTTATTTTTAGATGGAATAGATAAAGCTCAAGAAGAACATGAAAGATATCACAGCAATTGGAGAGCCATGGCTCATGACTTTAATCTGCCACCTATAGTAGCAAAAGAAATAGTAGCTAGTTGTGACAAATGTCAGCTAAAAGGGGAAGCCATGCATGGACAAGTAGACTGTAGCCCAGGAATATGGCAACTAGATTGCACACATCTAGAAGGAAAAGTTATCCTGGTAGCAGTCCATGTAGCCAGTGGCTATATAGAAGCAGAAGTCATTCCAGCAGAAACAGGACAGGAAACAGCATACTTTATATTAAAACTAGCAGGAAGATGGCCAGTAAAAGTAATACATACTGACAATGGGTCCAATTTCACCAGTGCAACAGTTAAGGCAGCCTGTTGGTGGGCAGGAGTCCAACAGGAATTTGGAATTCCCTACAATCCCCAAAGTCAAGGAGTAGTGGAATCTATGAACAAAGAATTAAAGAAAATCATAGGGCAAGTAAGAGACCAAGCTGAACACCTTAAGACAGCAGTACAAATGGCAGTATTCATCCACAATTTTAAAAGAAAAGGGGGGATTGGGGGATACAGTGCAGGGGAAAGAATAATAGACATAATAGCAACAGATATACATACTAAAGAATTACATTTACAAATTATGAAAATTTAAAATTTTCGGGTTTATTACAGAGACAGCATAGATCCCATTTGGAAAGGACCAGCAAAACTCCTCTGGAAAGGTGAAGGGGCAGTAGTAATACAAGACAATAGTGAGATAAAGGTAGTACCAAGAAGAAAAGCAAAGATCATTAGGGATTATGGAAAACAGATGGCAGGTGATGATTGTGTGGCAGGTAGACAGGATGAGGATTAGAACATGGAACAGTTTAGTAAAACATCATATGTATATTTCAAAGAAAGCTAAAAAGTGGTTCTATAGACATCACTATGAAAGTAGACATCCGAGAGTAAGTTCAGAAGTACACATCCCGTTAGGGGAGGCTACATTAATAGTAAGAACATATTGGGGTCTGCACCCAGGAGAGAAAGAATGGCAATTGGGTCATGGGGTCTCCATAGAATGGAGGCAGAAGAGGTATAGTACACAAATAGACCCTGATCTGGCAGACCATCTAATCCATCTGTATTATTTTGACTGTTTTTCAGAATCTGCCATAAGGAAAGCCATATTAGGAGAAATAGTTAGTCCTAGGTGCGAATATCAAGCAGGACATAACAAGGTAGGATCTCTGCAATATTTGGCATTGAAAGCATTAGTAGTCCCAAACAAGGCAAGGCCACCCTTGCCTAGTGTTAGGAAATTAGTAGAGGATAGATGGAACAAGCCCCGGAAGACCAGGGGCCACCGAGGGAGCCACACAATGAATGGGTGCTAGAACTATTAGAGGAGCTCAAGCAGGAAGCTGTTAGGCATTTCCCTCGGCAGTGGCTACATGGCCTAGGACAACTTATATATAGTACCTATGGGGATACTTGGGAAGGAGTTGAAGCTATAATAAGAACTTTGCAACAACTGCTGTTTGTCCATTTCAGAATTGGGTGCCGACATAGCAGAATAGGCATTTCGAAGAAGAAGAGTAAGGATGGAGCCAGTAGATCCTAAACTAGAGCCCTGGAACCATCCGGGAAGCCAGCCTAAAACTGCTTGTAACAAGTGCTATTGTAAAAAGTGTTGCTATCATTGCCAGCTGTGCTTTTTAAACAAAGGCTTAGGCATCTCCTATGGCAGGAAGAAGCGGAGACCCCGACGAGGACCTTCTCAGAGCAGTAAAGATCATCAAAATCCTATACCAAAGCAGTAAGTAGTGGTAATTAATAATGTAATGTTGTCCTTAGAAATAGCTGCAATAGTAGGACTGGTAGTAGCATTAATCGCAGCAATAGTTGTATGGACTATAGTATTTATAGAATATAGGAAGATTAGGGAGCAAAGGAAAATAGACTGGTTAATCCAAAGAATAAGTGAAAGAGCAGAAGACAGTGGCAATGAGAGTGATGGGGACACAGACGAGTTATCAGCACTTGTGGAGATGGGGAATCTTAATTTTGGGGATGCTAATAATTTGTAAAGCTACAGATTGGTGGGTCACAGTATACTATGGAGTACCTGTGTGGAAAGATGCAGAAACCACCTTATTTTGCGCATCAGATGATAAAGCATATGAGACAGAAGCGCATAATGTCTGGGCCACACATGCCTGTGTACCCACAGACCCCAACCCACAAGAAGTAAACCTAAAAAATGTGACAGAAGATTTTAACATGTGGAAAAATAATATGGTAGAGCAGATGCATGAAGATATAATCAGTCTATGGGATCAAAGCCTAAAGCCATGTGTAAAATTAACCCCTCTCTGTGTCACGTTAAACTGTAGCAATGCCAACACCAATAGCACCAATAGCACTAGCGCCCCTAGCATGGGCCCTGGAGAAATAAAAAACTGTTCTTTTAATGTTACCACAGAAGTAAGAGATAAAGAAAAGAAAGTCTATGCACTGTTTTATAAACTTGATGTAGTACAAATTAATGAAAGTGACAGTAATAGTACAAAGGATAGTACTCAGTATAGACTAATAAATTGTAATACCTCAGCCATCACACAGGCTTGTCCAAAGGTATCCTTTGAGCCAATTCCTATACATTATTGTGCCCCAGCTGGTTTTGCGATTCTAAAGTGTGAGGATCCGAGATTCAATGGAACAGGACCATGCAATAATGTTAGCTCAGTACAATGTACACATGGAATTATGCCAGTAGCATCAACTCAACTGCTGTTGAATGGCAGTCTAGCAGAAAAAGAGGTGATGATTAGATCTGAAAATATTACAAACAATGCCAAAAACATAATAGTACAGTTTAATGAATCGGTACCAATTACTTGTATCAGACCCAACAACAATACGAGAAAAGGTATACCTATTGGACCAGGACAAGTCTTCTATACAAGTGACATAATAGGGGATATAAGACAAGCATATTGTAGTATCAACAAAACAAAATGGGATGCCTCTTTACAAAAGGTAGCTGAACAATTAAGAAAACACTTCCCTAATAAAACAATAAATTTTACCAAACCCTCAGGAGGGGATCTAGAAATTACAACACATAGTTTTAATTGTGGAGGAGAATTTTTCTATTGTAATACAACAAGCCTGTTTAATAGCACATGGAAGAATGGCGCCACCATACAGGAGAATAGCACGGAGACAAATGGAATTATGACTCTCCCATGCAGAATAAAACAAATTGTAGACATGTGGCAGGAAGTAGGACAAGCAATGTATGCCCCTCCCATTGCAGGAGTAATATATTGTACATCAAACATTACAGGAATAATATTGACAAGAGATGGTGGGATAAATAGCACAAATGAAACCTTCAGACCTGGAGGAGGAGATATGAAGGACAATTGGAGAAGTGAATTATATAAGTATAAAACAGTAAAAATCAAACCATTAGGAGTAGCACCCACCAAGGCAAAGAGAAGAGTGGTGCAGAGAGAAAAAAGGGCAGTTGGAATGGGAGCTGTCCTCCTTGGGTTCTTGGGAGCAGCAGGAAGCACTATGGGCGCGGCGTCAATAACGCTGACGGTACAGGTCAGACAATTATTGTCTGGCATAGTGCAACAGCAAAGCAATTTGCTGAGGGCTATAGAGGCGCAACAACATCTGTTGCAACTCACAGTCTGGGGCATTAAGCAGCTCCAGGCAAGAGTCCTGGCTGTGGAAAGATACCTACAGGATCAACAGCTCCTAGGAATTTGGGGCTGCTCTGGAAAACTCATCTGCACCACTACTGTGCCCTGGAACACTAGTTGGAGTAATAAATCTTATGAGGATATTTGGGGTAACATGACCTGGATACAATGGGAAAGGGAGATTAGCAATTACACAGGCCAAATATACTACCTAATTGAACAATCGCAAAACCAGCAGGAAAAGAATGAACAAGAATTATTGTCATTGGACCAGTGGGCAAACTTGTGGAATTGGTTTGACATATCAAACTGGCTATGGTATATAAAAATATTCATAATGATAGTAGGAGGTTTAATAGGGTTAAGAATAGTTTTTGCTGTGCTTTCTATAGTAAATAGAGTTAGGCAGGGATACTCACCATTGTCATTTCAGACCCTTACCCACCACCAGAGGGAACCCGACAGGCCCGAAGGAATCGAAGAAAGAGGTGGAGAGCAAGGCAGAGACAGATCCATTCGATTAGTAAACGGATTCTTAGCGATTGCCTGGGACGACGTGCGGAGCCTGTGCCTTTTCAGCTACCACCGCTTGAGAGACTTCATCTGGATTGTAGCGAGGACAGTAGAATTACTGGGACGCAGCAGTCTCCAGGGACTGAGACTGGGGTGGGAGGGCCTCAAACATCTGTGGAATCTCCTGCTGTATTGGGGTCAGGAACTAAAAATTAGTGCTATTAGTTTGCTTGATACAGTAGCAATAGCAGTAGCTAACTGGACAGATAGGGTTATAGAATTAGCACAAAGAGCTGGTAGAGCTATTCTTAACATACCTAGAAGGATAAGACAAGGCGCAGAAAGAGCTTTGCTATAAAATGGGAAGCAAATGTTCAAAATTGGGATGGCCCGCGGTAAGGGAAAGAATAAGGCAAACCCCTCCAACAGAAGAAAGAGCAGGAGCAGCAGCAGAAGGAGTAGGAGCAGCATCTCAAGATTTAGCTAGGCATGGAGCAATTACAAGCAGCAATACAGCAGCCACTAATCCTGATTGTGCCTGGGTAGAAGCACAACAGGAGGACTCAGAGGTAGGCTTTCCAGTTAGACCACAGGTACCTTTGAGACCAATGACTTATAAAGGAGCTTTTGATCTCAGCTTCTTTTTAAAAGAAAAGGGGGGACTGGATGGGCTAATTCACTCTCAGAGAAGACAAGATATCCTTGACCTGTGGGTTTATAATACACAAGGATACTTCCCAGATTGGCAGAACTACACTCCAGGGCCAGGGACTAGATTCCCACTGACCTTTGGGTGGTGCTTCAAACTAGTACCAATGAATCCAGCAGAGATAGAGGAAGCCAATAAAGGAGAGAACAACAGCTTATTACACCCCCTCTGCCAGCACGGAATGGAAGACGCAGACAGAGAAGTGCTGGTATGGAGATTTGACAGTAGCCTAGCAAGAAGACACGTAGCCCGAGAGCTGCATCCGGAGTACTACAAAAACTGATGACACAGAAGTTGCTGACACAGGAGTTGCTGACAAGGGGACTTTCCGTCTGGGACTTTCCGGGGAGGCGCGGCATGGGCGGGGACTGGGGAAGAAGCTGCATATAAGCAGCCGCTTTTCGCCTGTACTGGGTCTCTCTTGCTAGACCAGATTTGAGCCTGGGAGCTCTCTGGCTAGTAGGGGAACCCACTGCT
>A2.CD.97.97CDKTB48.AF286238_G.CM.96.96CMABB55.AY772535
TTTTTCGAAGCGAAGTACCAGGGAAGTTCTCTCGACGCAAGACTCGGCTTGCTGAGGTGCACACGGCAAGAGGCGAGAAGCGACGGCTGGTGAGTACGCCTAAAATTTTTGACTAGCGGAGGCTAGAAGGAGAGAGATGGGTGCGAGAGCGTCAGTATTGAGCGGCGGAAAATTAGAAGCTTGGGAGAAAATTCGGTTAAGGCCAGGGGGAAAGAAAAAATATAGACTGAAACATTTAGTATGGGCAAGCAGGGAGCTGGAAAAATTCTCAATCAACCCCAGCCTTTTAGAAACAGAAACAGGATGTAGACGAATATTTGGGCAATTACAACCAGCTCTCGAGACAGGAACAGAAGAACTTAGATCATTATATAATACAATAGCAGTCCTCTACTTTGTTCATCAAAAGATAGAGGTAAAAGACACCAAGGAAGCTCTAGATAAAATAGAGGAAGAACAAAACAAATGCAAGCAGAAGACACAGCAGGCAGCAGCTGACACAGGAAGCAGCAGCAGTCAAAATTACAGAGGTAGCAGCAGTCAAAATTACCCTATAGTGCAAAATGCACAAGGGCAAATGGTACACCAGGCCGTGTCACCTAGGACTTTGAATGCATGGGTCAAAGTAGTTGAAGAGAAGGCTTTTAGCCCAGAAGTAATACCCATGTTTACAGCATTATCAGAAGGAGCCACCCCACAAGACTTAAATACTATGCTAAACACAGTGGGGGGACATCAAGCAGCTATGCAAATGTTAAAAGATACCATCAATGAGGAAGCTGCAGAATGGGACAGGTTACATCCAGTACAGGCAGGGCCTATTCCACCAGGCCAGATGAGAGAACCAAGGGGAAGTGACATAGCGGGAGCTACTAGTAACCTTCAGGAACAAATAGGATGGATGACCAGCAACCCACCTATTCCAGTGGGAGAAATCTATAAAAGATGGATAATCCTGGGATTAAATAAAATAGTAAGAATGTATAGCCCTGTCAGCATTTTGGACATAAAACAAGGGCCAAAAGAACCCTTTAGAGACTATGTAGATAGGTTCTTTAAAACTCTCAGAGCTGAGCAAGCTACACAGGAGGTAAAAAATTGGATGACAGACACCTTGCTGGTCCAAAATGCAAACCCAGATTGTAAATCCATCTTGAGGGCATTAGGACCAGGGGCTACATTAGAAGAAATGATGACAGCATGTCAGGGAGTGGGAGGACCCGGCCATAAAGCAAGGGTTTTAGCTGAAGCAATGAGCCAAGTACAAAATACAAACATAATGATACAGAGAGGCAATTTTAAGGGTCAAAAAAGAATTAAGTGTTTCAACTGTGGCAAGGAAGGACACCTAGCTAGAAATTGCAGGGCCCCTAGGAAAAAGGGCTGCTGGAAATGTGGGAAGGAAGGACATCAAATGAAAGACTGCACTGAGAGACAGGCTAATTTTTTAGGGAAAATTTGGCCTTCCAACAAAGGGAGGCCAGGGAATTTTCCTCAGAGCAGGACAGAGCCAACAGCCCCACCAATGGAGGAAGAGATAACCTCCTCGCTGAAGCAGGAGAACAGGGAGCCGTCCACCCCTGCAATTTCCCTCAAATCACTCTTTGGCAACGACCTCTTGTCACAGTGAAAATAGAAGGACAGCTAAGAGAAGCTTTATTAGATACAGGAGCAGATGATACAGTGTTAGAAGACATAAATCTGCCATGGAAATGGAAACCAAAAATGATAGGGGGAATTGGAGGTTTTATCAAAGTAAGACAATATGATCAGATAGTTATAGAAATTTGTGGAAAAAGGGCTATCGGTACAGTATTAGTAGGACCTACACCTGTCAACATAATTGGAAGAAATATGTTGGTTCAGCTTGGTTGTACTCTAAATTTTCCAATTAGTCCTATTGAAACTGTACCAGTAAAATTGAAGCCAGGAATGGATGGTCCAAAGGTCAAACAATGGCCATTGACAGAAGAAAAAATAAAAGCATTAACAGAAATTTGTAAAGAAATGGAAAAGGAAGGGAAAATTTCAAAAATTGGGCCTGAAAATCCATACAACACTCCAGTGTTTGCTATAAAGAAAAAAGACAGCGATAAATGGAGAAAATTAGTAGATTTCAGAGAACTCAATAAGAGAACTCAAGACTTCTGGGAAGTTCAGTTAGGAATACCACACCCAGCGGGATTAAAAAAGAAAAAATCAGTAACAGTATTAGATGTGGGGGACGCATATTTTTCCGTTCCCCTACATGAAGACTTCAGGAAATATACTGCATTCACCATACCTAGTATAAACAATGAGACACCAGGAATTAGGTATCAGTACAATGTACTTCCACAGGGATGGAAAGGATCACCAGCAATATTCCAGAGTAGCATGACAAAAATCCTAGATCCCTTTAGGGCAAGAAATCCAGAGATGGTCATCTACCAATACATGGATGACTTGTATGTAGGATCTGATTTAGAAATAGATCAGCATAGAGCAAAAATAGAGGAGTTAAGGGCTCATTTATTAAGATGGGGATTTACTACACCAGACAAAAAGCATCAGAAAGAACCTCCATTTCTGTGGATGGGATATGAGCTTCATCCTGACAAGTGGACAGTCCAGCCTATAAAGCTGCCAGAAAAAGACAGCTGGACTGTCAATGATATACAGAAATTAGTAGGAAAGTTAAATTGGGCAAGTCAGATTTATGCAGGGATTAAAGTAAGGCAACTGTGTAAACTCCTTAGAGGAACCAAAGCATTAACAGACATAGTACCACTGACTAGAGAAGCAGAATTAGAATTGGAAGAGAACAGGGAGATTCTAAAAGACCCTGTACATGGGGTATATTATGACCCATCAAAAGACTTAATAGCAGAAATACAGAAACAAGGGCAAGGCCAATGGTCATATCAAATTTATCAAGAACCATTTAAAAATCTAAAAACAGGGAAATATGCAAAAAGGAAGTCCACCCACACCAATGATGTAAAACAATTAACAGAAGCAGTACAAAAAATAGCCACAGAAAGCATAGTAATATGGGGAAAGATTCCTAAATTTAGACTACCCATACAAAAAGAAACATGGGAGACATGGTGGACGGAGTGGTGGCAGGCTACCTGGATTCCTGAGTGGGAGTTTGTCAATACCCCTCCTCTAGTAAAACTATGGTACCAGTTAGAAACAGAACCCATAGCAGGAGCAGAAACTTTCTATGTAGATGGGGCAGCTAATAGAGAGACTAAACTAGGAAAGGCAGGGTATGTCACTGATAGAGGAAGACAAAAAATTGTCCCCTTGACAGAGACAACAAATCAAAAGACTGAATTACATGCAATCTATTTGGCTTTACAGGATTCAGGGTCAGAAGTAAACATAGTAACAGATTCACAGTATGCATTAGGAATCATTCAAGCGCAACCAGATAGCAGTGAATCAGAGTTAGTCAATCAAATAATAGAAAAGTTAATAGAAAAGGAAAGGGTCTACCTGTCATGGGTACCAGCACACAAAGGGATTGGAGGAAATGAACAGGTGGATAAATTAGTCAGTTGTGGAATCAGAAAAGTGTTATTTTTAGATGGGATAGATAAGGCTCAAGAAGAACATGAAAAATATCACAGTAATTGGAGAGCAATGGCTCATGACTTTAATCTGCCACCTATAGTAGCCAAAGAAATAGTAGCCAGCTGTGATAAATGGTCAGGCTAAAAGGGGAAGCCATGCATGGACAAGTAGACTGCAGTCCAGGAATATGGCAACTAGATTGCACACATCTAGAAGGAAAAATTATCGTGGTAGCAGTCCATGTAGCCAGTGGCTATATAGAAGCAGAAGTCATCCCAGCAGAGACAGGACAGGAGACAGCATACTTTCTATTAAAATTAGCAGGAAGATGGCCAGTAAAAGTAATACATACAGACAATGGGCCCAATTTCACCAGTGCAGCAGTTAAGGCAGCCTGTTGGTGGGCAGATGTCAAACAGGAATTTGGGATTCCCTACAATCCCCAAAGTCAAGGAGTAGTGGAATCTATGAATAAAGAATTAAAGAAAATCATAGGGCAGGTAAGAGATCAAGCTGAACATCTTAAGACAGCAGTGCAAATGGCAGTGTTCATCCACAATTTTAAAAGAAAAGGGGGGATTGGGGGATACAGTGCAGGGGAAAGAATAATAGACATAATAGCAACAGATATACAAACTAAAGAATTACAAAAACAAATCATAAAAATTCAAAATTTTCGGGTTTATTACAGGGACAGCAGAGATCCAATTTGGAAAGGACCAGCAAAACTCCTTTGGAAAGGTGAAGGGGCAGTAGTAATACAAGACAATGGTGATATAAAAGTAGTACCAAGAAGAAAAGCAAAGATCATTAGGGATTATGGAAAACAGATGGCAGGTGATGATTGTGTGGCAGGTAGACAGGATGAGGATTAGAACATGGAACAGTCTAGTAAAACATCATATGTATGTGTCAAAGAAAGCTAGAGAGTGGTTCTATAGACATCACTATGAAAGCAGACATCCAAGAGTAAGTTCAGAAGTACACATCCCGCTAAAGGAGGCTAGATTAATAGTAAGAACATATTGGGGTCTGCACCCAGGAGAAAAAGACTGGCACTTGGGTCATGGGGTCTCCATAGAATGGAGGCAGGGAAGGTACAGTACACAAATAGACCCTGATCTGGCAGACCATCTAATCCATCTGTATTATTTTGACTGTTTTTCAGAATCTGCCATAAGGAGAGCCATATTAGGAGAAATAGTTAGGCCTAGATGTGAATATCAAGCAGGACATAATAAGGTAGGGTCTCTGCAATATTTGGCATTGAGAGCATTAGTAGCTTCAACAAGGACAAAGCCACCTTTGCCTAGTGTTAGGAAATTAGTAGAGGATAGATGGAACAAGCCCCAGAAGACCAGGGGCCACCGAGGGAGCCACACAATGAATGGGTGTTAGAACTGTTAGAGGAGCTAAAGCAAGAAGCAGTTAGACATTTCCCTAGGCCGTGGCTACATGGCCTGGGACAACATATCTATAATACCTATGGGGATACTAGGGAGGGAGTTGAAGCTATAGTAAGAATTTTGCAACAACTACTGTTTGTTCATTTCAGAATTGGGTGCCAACATAGCAGAATAGGCATTATTCCAAGAAGAAGAGTAAGGGATGGAGCCAGTAGACCCTAACTTAGAGCCCTGGAACCATCCGGGAAGCCAGCCTAAAACTGCTTGTAACAATTGCTATTGTAAAAAGTGTTGCTATCATTGCCAAAGGTGCTTTCTAAACAAAGGCTTAGGCATCTCCTATGGCAGGAAGAAGCGGAGACCCCGACGAGGACCTGATCAGGGCAATACGGATCATCAAAATCCTGTACCAAAGCAGTAAGTAGTAGTAATCAATATAGGTAATGTCACCTTTAGCAATACTGTCAATAGTAGGACTGGTAGTAGCATCAATTTTAGCAATAGTTGTGTGGACTGTAGTATTTATAGAATATAGAAAGATTAAGAAGCAAAGGAAAATAGACTGGTTACTTGAGAGAATAAGTGAAAGAGCAGAAGACAGTGGCAACGAGAGTGATGGGGACACAGAGGAATTGTCAAAAATGGTGGGAATGGGGAATCTTGGTTTTTGGGATGATAATGATGTGTAAGGCTGCAGATTTGTGGGTCACAGTATACTATGGAGTACCTGTGTGGAGAGATGCAGATACCACCCTATTTTGTGCATCAGACGCTAAAGCATATGCTACAGAAAAGCATAATGTCTGGGCCACACATGCCTGTGTACCCACAGACCCCAACCCACAAGAAGTAAACCTGGCAAATGTAACAGAAGATTTTAACATGTGGAAAAATAACATGGTAGAGCAGATGCATGCAGATATAATCAGTCTATGGGATCAAAGCCTAAAGCCATGTGTAAAATTAACCCCTCTCTGCGTCACTTTAAATTGTAGCAATGCCAACACCACTAACACCAATAGCACTGAAGAAATAAAAAACTGCTCTTACAATATGCCCACAGAACTAAAAGATAAAACACAGAAAGTCTATTCACTGTTTTATGAACTTGATGTAGTACTACTTAATAGAAGTAAGAATAGTAGTTATAGTACTTATAGACTAATAAGTTGTAATACCTCAGTCATCACACAAGCTTGTCCAAAGGTATCCTTTGAGCCAATTCCTATACATTATTGTGCCCCAGCTGGTTATGCGATTCTAAAGTGTAAGGATAAGGAATTCAATGGAAAAGGGTCATGCAGTAATGTTAGCTCAGTACAATGTGCACATGGAATTAGGCCAGTAGCATCAACTCAACTGCTGCTGAATGGCAGTCTAGCAGAAGGAAAGGTAATGATTAGATCTGAAAATATTACAGACAATGCCAAAAACATAATAGTACAGTTTAATAAACCTGTACCAATTAATTGTACCAGACCCAACAACAATACAAGAAAAAGTATACGCTTTGGACCAGGACAGGCCTTCTATACAAATAATAACATAATAGGGGATATAAGACAAGCACATTGTAATATCAGCATAACAGAATGGAATGCCACTCTAAAAAAGGTAGTTGAACAATTAAGAGAACACTTCCCTAATAAAACAATAATCTTTAATAGCTCCTCAGGAGGGGACCTAGAAATTACAACACATAGTTTTAATTGTGGAGGAGAATTTTTCTATTGCAATACAACAGGCCTGTTTAATAGCACATGGGAAAATGGCACTAACAAACAGAATTACACGGAGTCAAATGACACTATAACGCTCCAATGCAGAATAAAACAAATTATAAACATGTGGCAGAGAGTAGGCCGAGCAATGTATGCCCCTCCCATTGCAGGAGTAATAAAGTGTACATCAAACATTACAGGAATGATATTGACAAGAGACGGTGGGAAGAACAGTATTAATGAGACCTTCAGACCTGGAGGAGGAGATATGAGGGACAATTGGAGAAGTGAATTATATAAGTATAAAGTAGTAAAAATTGAACCACTAGGAATAGCACCCACAGAGGCAAGGAGAAGAGTGGTGCAGAGAGAAAAAAGAGCAGTTGGATTGGGAGCTGTTTTCCTTGGGTTCTTGGGAGCAGCAGGAAGCACTATGGGCGCGGCGTCAATAACGCTGACGGTACAGGCCAGACAATTATTGACTGGCATAGTGCAACAGCAAAGCAATTTGCTGAAGGCTATAGAGGCTCAACAACAGATGTTGAGGCTCACAGTCTGGGGCATTAAACAGCTCCAGGCAAGAGTCCTGGCTCTGGAAAGATACCTACAGGATCAACAGCTCCTAGGAATTTGGGGCTGCTCTGGAAAACTCATCTGCGCCACTGATGTGAGATGGAACTCTAGTTGGAGTAATAAGACTCAGGAGCAGATTTGGAAAAACATGACCTGGTTGCAATGGGATAAGGAAATTAGCACTTACACAGACATAATATATATGCTACTTGAGGAATCGCAGAACCAGCAGGAAAAGAATGAACAAGACTTATTGGCATTAGACAAATGGGCAAATTTGTGGAATTGGTTTGACATAACAAGATGGCTGTGGTATATAAAAATATTTATAATGATAGTAGGAGGCTTGATAGGATTAAGAATAGTTATTGCTATAATTTCTGTAGTAAAAAGAGTTAGGCAGGGATACTCACCATTGTCATTTCAGATCCCTACCCCAAACCCAGAGGGACTCGACAGGCCCGGAAGAATCGAAGAAGAAGGTGGAGAGCAAGGCAGAGACAGATCGATTCGATTAGTGAGCGGATTCTTAGCACTTGCCTGGGACGACCTACGGAGCCTGTGCCTCTTCAGCTACCACCGCTTGAGAGATTGCATCTTGATTGCAGCGAGGATTGTGGAACTTGTGGGACACAGCAGTCTCAAGGGGCTGAGACTGGGGTGGGAAGGCCTCAAACATCTGTGGAATCTTCTGGTATATTGGGGTCAGGAATTGAAGACTAGTGCTATTAGATTGCTTGATACCATAGCAGTAGCAGTAGCTGAGTGGACAGATAGGGTTATAGAAATAGGACAAAGAGCTTGCAGAGCTATCCGCAACATACCTAGAAGAATCAGACAGGGCCTCGAAAGGGCGTTACTATAAAATGGGGGGCAAGTGGTCAAAAAGAACCATAGTGGGATGGCCTGAGATTAGGGAAAGAATGAGACGAACTCCTCCAGCAGCAGAAGGAGTAAGACCAACTCCTCCAGCTGCAGAAGGAGTAGGAGCAGTGTCTCAAGATTTAGCCAGACATGGAGCAGTCACAAGCAGTAATACAGCAGCTAACAATCCTGATTGCGCCTGGCTGGAAGCGCAAGAAGAGGAGGAAGTAGGCTTTCCAGTCAGGCCACAGGTACCTTTAAGGGCGATGACCTACAAGGGAGCTGTAGATCTCAGCTTCTTTTTAAAAGAAAAGGGGGGACTGGATGGGTTAATTTACTCCCAGCAAAGACAAGATATCCTTGACTTGTGGGTCTATAATACACAAGGATTCTTCCCAGATTGGCAGAACTACACACCAGGGCCAGGGGTTAGATACCCACTGTGCTTTGGGTGGTGCTTCAAATTAGTACCAGTGGATCCAGYAGMAATAGAGGAAGACAATAAAGGAGAGAACACCAGCTTATTACATCCCATCAGCCAGCATGGAATAGGGGACACTGACAGAGAAGTGCTGATGTGGAAATTTGACAGCAGCTTAGCACGGAGACACCTAGCCCGAGAGCTGCATCCGGAGTTCTACAGAGACTGCTGACACAGAAGTTGCTGACAAGGGGACTTTCCGCCTGGGACTTTCCGGGGAGGCGTGGCCTGGGAGGGGCTGGGGAGTGGCTAACCCCCAGAAGCTGCATATAAGCAGCCGCTTTYYGC
>A2.CY.94.94CY017_41.AF286237_H.BE.93.VI991.AF190127
TTGAAAAGCGAAAGTAACAGGGACTCGAAAGCGAAAGTTCCAGAGGAGTTCTCTCGACGCAGGACTCGGCTTGCTGAGGTGCACACGGCAAGAGGCGAGGGGCGGCGACTGGTGAGTACGCCTAATATTTTTGACTAGCAGAGGCTAGAAGGAGAGAGATGGGTGCGAGAGCGTCAATATTAAGCGGGGGAAAATTAGATGCTTGGGAGAAAATTCGGTTAAGGCCAGGGGGAAAGAAAAAATATAGACTGAAACATTTGGTATGGGCAAGCAGGGAGCTGGAGAAATTCTCAATTAACCCTGGCCTTTTAGAAACACCAGAGGGATGTAGACAAATAATAAGGCAGTTACAACCAGCTCTCCAAACAGGAACAGAAGAACTTAAATCATTATATAATACAGTAGTAGTCCTCTACTGGGTACATCAAAGGGTAGATGTAAAAGACACCAAGGAAGCTCTAGATAAAATAGAGGAAGAACAAAACAAGCAGAAAACACAGCATGCAGCAGCTGACACAGGGAACAGCAGCAGTCAAAATTATCCCATAGTGCAAAATGCACAAGGGCAAATGGTACACCAGGCTATATCACCTAGGACGTTGAATGCCTGGGTCAAAGTAGTAGAAGAAAAGGCTTTCAGCCCAGAAGTAATACCTATGTTTACAGCATTATCAGAAGGAGCCACCCCACAAGACTTAAATACTATGCTAAACACAGTGGGGGGACATCAAGCAGCTATGCAAATGTTAAAAGATACCATCAATGAGGAAGCTGCAGAATGGGACAGGGTACATCCAGTACATGCAGGGCCTATTCCACCAGGCCAGATGAGAGAACCAAGGGGAAGTGACATAGCAGGAACTACTAGTACCCTTCAGGAACAAATAGGTTGGATGACCAGCGATCCACCCATCCCAGTGGGAGAAATTTATAAAAGATGGATAATCCTGGGATTAAATAAAATAGTAAGAATGTATAGCCCTGTCAGCATTTTGGACATAAGACAAGGGCCAAAAGAACCCTTTAGAGATTATGTGGATAGGTTCTTTAAAACTCTAAGAGCTGAGCAAGCCACACAGGAGGTAAAAAACTGGATGACGGACACCTTGCTGGTCCAAAATGCGAACCCAGATTGTAGATCCATCTTGAGAGCATTAGGACCAGGGGCCTCATTAGAAGAAATGATGACAGCATGTCAGGGAGTGGGAGGACCCAGCCATAAAGCAAGGGTTTTGGCTGAAGCAATGAGCCATGTACAAAGTACAAATACAAACATAATGATGCAGAGAGGCAATTTTAGGGGTCAAAAAAGAATTAAGTGTTTCAACTGTGGCAAGGAAGGACACCTAGCCAGAAATTGCAGGGCCCCTAGGAAAAAGGGCTGCTGGAAATGTGGAAAGGAAGGACATCAAATGAAAGATTGCACTGAGAGACAGGCTAATTTTTTAGGGAAAATTTGGCCTTCCAACAAAGGGAGGCCAGGAAATTTTCCTCAGAGCAGAACAGAGCCAACAGCCCCACCAGCAGAGAACTTGAGAATGGGGGAAGAGATAACCTCCTCCCTGAAGCAGGAACTGGAGACCAGGGAACCATACAATCCTGCAATTTCCCTCAAATCACTCTTTGGCAACGACCCCTTGTTACAGTAAAGATAGAGGGACAGCTAAAAGAAGCTCTATTAGATACAGGAGCAGATGATACAGTGTTAGAAGAAATAAATTTGCCAGGAAAATGGAAACCAAAAATGATAGGGGGAATTGGAGGTTTTATCAAAGTAAGACAATATGATCAGATAGCTATAGAAATTTGTGGAAAAAGGGCCATAGGTACAGTATTAGTAGGACCTACCCCTGTCAACATAATCGGAAGAAATATGTTGGTTCAGCTTGGTTGTACTTTAAATTTTCCAATTAGTCCTATTGAAACTGTACCAGTAAAATTAAAGCCAGGAATGGATGGTCCAAAGGTTAAACAATGGCCATTGACAGAAGAAAAAATAAAAGCATTAACAGAAATCTGTAAAGAAATGGAAAAGGAAGGAAAAATTTCAAAAATTGGGCCTGAAAATCCATACAACACTCCAGTGTTTGCTATAAAGAAAAAAGACAGCACTAAATGGAGAAAATTAGTAGATTTTAGAGAACTCAATAAGAGAACTCAAGACTTCTGGGAAGTTCAGTTAGGAATACCACATCCAGCAGGATTAAAAAAGAAAAAAGCAGTAACAGTACTTGATGTGGGGGACGCATATTTTTCCGTTCCCTTACATGAAGACTTCAGAAAATATACTGCATTCACCATACCTAGTACCAACAATGAGACACCAGGAGTTAGGTATCAGTACAATGTACTTCCACAGGGATGGAAAGGATCACCAGCAATATTCCAGAGTAGCATGACAAAGATCTTAGAGCCCTTTAGATCAAAGAATACAGAATTAATCATCTACCAATACATGGATGACTTGTATGTAGGATCTGATTTAGAAATAAGCCAGCATAGAGTAAAAATAGAGGAATTAAGGGCTCACTTATTGAAATGGGGATTTTATACACCAGACAAAAAACATCAGAAAGAACCTCCATTTCTTTGGATGGGATATGAGCTTCATCCTGACAAATGGACAGTCCAGCCTATAAAGCTGCCAGAAAAAGACAGCTGGACTGTCAATGATATACAGAAATTAGTAGGGAAATTAAATTGGGCAAGTCAGATTTATGCAGGGATTAAAGTAAAGCAACTGTGTAAACTCCTTAGAGGAGCCAAAGCACTAACAGACATAGTAACACTGACTAAAGAAGCAGAGTTAGAATTAGAAGAGAACAGGGAAATTTTAAAAACCCCTGTACATGGGGTATACTATGACCCATCAAAAGACTTAATAGCAGAAATACAGAAACAAGGGCAAGACCAATGGACATATCAAATTTATCAGGAACCCTTTAAGAATCTGAAAACAGGGAAATATGCAAAAAGGAGGTCCACCCACACTAATGATATAAAACAGTTAACAGAAGCAGTACAAAAAATAACCATGGAAAGCATAGTGATATGGGGAAAGACTCCTAAATTTAAATTACCCATACAAAAGGAAACATGGGAGACATGGTGGGCGGAGTATTGGCAGGCTACCTGGATTCCTGAGTGGGAGTTTGTCAATACCCCTCCTCTAGTAAAACTGTGGTACCAGTTAGAAAAAGAACCCATAGCAGGAGCAGAAACTTTCTATGTAGATGGGGCAGCTAATAGAGAGACTAAACTAGGAAAGGCAGGGTATGTCACTGACAGAGGAAGACAAAAAATTGTCTCCCTGACGGAGACAACAAATCAAAAGACTGAATTACATGCAATCTATTTGGCTTTACAGGATTCAGGATTAGAAGTGAACATAGTGACAGATTCACAGTATGCATTAGGAATCATTCAAGCACAACCAGAAAGGAGTGAATCAGAGATAGTCAATCAAATAATAGAAAAATTAATAGAAAAGGAAAGGGTCTACCTATCATGGGTACCAGCACACAAAGGGATTGGAGGAAATGAACAAGTAGACAAATTAGTCAGTTCTGGAATCAGGAAAGTGCTATTTTTAGATGGGATAGATAAGGCTCAAGAGGAACATGAAAGATATCACAGCAATTGGAGAGCAATGGCTCATGACTTTAATCTACCACCTGTAGTAGCAAAAGAAATAGTAGCTAGCTGTGATAAATGTCAGCTAAAAGGGGAAGCCATGCATGGACAAGTAGACTGTAGTCCAGGAATATGGCAACTAGATTGCACACATCTTGAAGGAAAAGTTATCCTGGTGGCAGTCCATGTGGCCAGTGGCTATATAGAAGCAGAAGTCATCCCAACAGAAACAGGACAGGATACAGCATACTTTATATTAAAACTAGCAGGAAGATGGCCAGTAAAAGTAATACATACAGACAATGGGCCCAATTTCATCAGTGCAACAGTTAAGGCAGCCTGTTGGTGGGCAGGTATCCAACAAGAATTTGGGATTCCCTACAATCCCCAAAGTCAAGGAGTAGTGGAATCTATGAATAAAGAATTAAAGAAAATCATAGGGCAGGTAAGAGATCAAGCTGAACACCTTAAGACAGCAGTACAAATGGCAGTATTCATTCACAATTTTAAAAGAAAAGGGGGGATTGGGGGATACAGTGCAGGGGAAAGAATAATAGACATAATAGCAACAGATATACAAACTAAAGAACTACAAAGACAAATTACAAAAATTCAAAATTTTCGGGTTTATTACAGGGACAGCAGAGATCCAATTTGGAAAGGACCAGCAAAACTCCTTTGGAAAGGTGAAGGGGCAGTAGTAATACAAGACAATAGTGACATAAAGGTAGTACCAAGAAGAAAAGCAAAGATCATTAGGGATTATGGAAAACAGATGGCAGGTGATGATTGTGTGGCAGGTAGACAGGATGAGGATTAGAACATGGAACAGTTTAGTTAAACATCATATGTATATTTCAAGGAAAGCTAAAGGTTGGGTCTATAAACATCACTATGAAAGCAGAAATCCAAGAATAAGTTCAGAAGTACACATCCCGCTAGGGGAGGCTAGAATAATAGTAAGAACATATTGGGGTCTGCACATAGGAGAAAAAGACTGGCACTTGGGTCATGGAGTCTCCATAGAATGGAGGCAAAACAGGTATCATACACAAATAGACCCTGATCTGGCAGACCATCTAATCCATCTGTATTATTTTGACTGTTTTTCAGAATCTGCCATAAGGAAAGCCATAATAGGAGAAATAGTTAGTCCTAGGTGTGAATATCAAGCAGGACATAACAAGGTAGGGTCTCTGCAATATTTGGCATTGAAAGCAGTAGTAGCTTCAACAAGGACAAAGCCACCTTTGCCTAGTGTTAGGAAATTAGTAGAGGATAGATGGAACAAGCCCCAGAAGACCAAGGGCCACAGAGGGAGCCATACAATGAATGGATGTTAGAACTGTTAGAGGAGCTCAAGCAGGAAGCTGTTAGACATTTCCCTAGGCACTGGCTACATGGCCTAGGACAATACATCTATAATACCTATGGGGATACCTGGGAAGGAGTTGAAGTTATCATAAGATATCTGCAACAACTACTGTTTGTCCATTTCAGAATTGGGTGCCAACATAGCAGGATAGGCATTATTCGAAGAAGAAGAGTAAGGGATGGAGCCAGTAGACCCTAAACTAGAGCCCTGGAACCATCCGGGAAGTCAGCCTAAAACTGCTTGTACCAAATGTTATTGTAAACGCTGTTGCTATCATTGCCAGTTGTGCTTTATAAACAAAGGCTTAGGCATCTCCTACGGCAGGAAGAAGCGACGACCCCGACGAAAGCCTTCTCCAAGCAATAAGGACCATCAAAATCCTATACCAAAGCAGTAAGTAGTAGTAATTAATATATGTAATGTTACCTTTAGTAATATTGGCAATAGTAGGACTGATAGTAGCTTTAATCTTAGCAATAGTTGTATGGACTATAGTATTCATAGAATATAAGAAAATTAAGAAGCAAAGGAAAATAGACTGGTTAATCAAAAGAATAAGTGAGAGAGCAGAAGACAGTGGCAATGAGAGTGATGGGGACACAGAGGAACTATCAGCACTTGTGGAGAGGGGGCATCTTGATTTTGGGGATGTTAATAATGTGTAAAGCTACAGATTTGTGGGTCACAGTATACTATGGAGTACCTGTGTGGAAAGATGCAGATACCATCCTATTTTGTGCATCAGATGCTAAAGCATATGATACAGAAGTGCATAATGTATGGGCCACACATGCCTGTGTACCCACAGACCCCAACCCACAAGAAATAAACCTGGAAAATGTAACAGAAAATTTTAATATGTGGAAAAATAACATGGTAGAGCAGATGCAAGAAGATATAATCAGCTTATGGGATCAAAGCCTAAAGCCATGTGTAAAATTAACCCCGCTCTGCGTCATTTTAAATTGTAGCAATGCCAATACCAGCACCCATAGCAATAGCAGTAGCACCCAGAGCCCCATTAATGAAGAAATAAAAAACTGCTCTTACAATACTACCACAATACTAAGAGATAAGACACAAAAAGTTTATTCACTGTTTTATAGACTTGATGTAGTACAACTTGATGAAAGTGAAAATAAGAATACATCAGGTAGTAATACTCTGTATAGACTAATAAATTGTAATACCTCAACCATCACACAAGCGTGTCCAAAGGTAACCTTTGAGCCAATTCCTATACATTATTGTGCCCCAGCTGGTTTTGCGATTCTAAAGTGTAAGGATCCGAGATTCAATGGAACAGGGTCATGCAAGAATGTTAGCTCAGTACAATGTACACATGGAATTAAACCAGTAGCATCAACTCAACTGCTGTTGAATGGCAGTCTAGCAGAAGGAGGGAAAATAATGATTAGATCTGAAAATATTACAAACAATGCCAAAAACATAATAGTTCAGTTTACTAAGCCTGTACTAATTACTTGTATCAGACCCAACAACAATACAAGAAAAAGTATACGCTTTGGACCAGGACAAGCCTTCTATACAAATGAAATAATAGGGGACATAAGACGAGCATATTGTAATATTAGTGGAAAACAATGGAATGAGACCTTACACAAGGTAATCACCAAATTAGGAAGCTACTTTGACAATAAAACAATAATTTTACAACCACCCGCAGGAGGGGATATAGAGATTATAACACATAGTTTTAATTGTGGAGGAGAGTTTTTCTATTGCAATACAACAAAATTGTTTAATAGCACCTGGACCAATAGCAGCTATACCAATGACACCTATAACAGCAACAGCACAGAAGATATCACAGGAAATATCACACTACAATGCAAAATAAAACAAATTGTGAACATGTGGCAGAGAGTAGGACAAGCAATGTATGCCCCTCCCATCAGAGGAAACATCACATGTATATCAAATATTACAGGACTAATATTGACATTTGACCGGAATAATACAAATAATGTTACCTTCAGACCTGGAGGAGGAGATATGAGGGACAATTGGAGAAGTGAATTATATAAATATAAAGTAGTAAAAATTGAACCACTGGGAGTAGCACCAACCGAGGCAAGGAGAAGAGTGGTGGAGAGAGAAAAAAGAGCAGTAGGAATGGGAGCTTTTTTCCTTGGGTTCTTGGGAGCAGCAGGAAGCACTATGGGCGCAGCGTCTATAACGTTGACGGTACAGGCCAGACAATTATTGTCTGGTATAGTGCAACAGCAAAGCAATTTGCTGAGAGCTATACAGGCGCAACAGCATATGTTGCAGCTCACGGTCTGGGGTATTAAACAACTCCAGGCAAGAGTCCTAGCTGTGGAAAGATACCTAAAGGATCAACAGCTCCTGGGGATTTGGGGCTGCTCTGGAAAACTCATCTGCACCACTAATGTGCCTTGGAACTCTAGTTGGAGTAATAAATCTCTGGATGAAATTTGGGACAACATGACTTGGATGGAGTGGGACAAACAAATTAACAATTACACAGATGAAATATACAGATTGCTTGAAGTCTCGCAAAACCAGCAGGAAAAGAATGAACAAGACTTATTAGCATTGGACAAATGGGCAAATCTATGGAATTGGTTTAGTATAACAAATTGGCTGTGGTATATAAGAATATTCATAATGATAGTAGGAGGTATAATAGGCTTAAGAATAGTTTTTGCTGTGCTTTCTATAGTAAATAGAGTTAGGCAGGGATACTCACCTCTGTCTTTACAGACCCTTATCCCGAACCAGCGGGGACCCGACAGGCCCAGAGAAATAGAAGAAGAAGGTGGCGAGCAAGACAGAGACAGATCCATTCGATTGGTGAACGGGTTCTTGCCACTTGTCTGGGAGGACCTGCGGAACCTGTGCCTCTTCAGCTACCGCCGCTTGAGAGACTTACTCTCGATTGTAGCGAGGACTGTGGAACTTCTGGGGAGAAGGGGGTGGGAAGCCCTCAAACTTCTGGGGAATCTCCTGCTGTATTGGGGACAGGAGCTAAAGAATAGTGCTATTAGTTTACTTAATACTACAGCAATAGCTGTAGCTGAGGGAACAGATAGGATTATAGAACTAGTGCAAAGAGCTTGGAGAGCTATCCTCCACATACCTAGAAGAATAAGACAGGGCTTTGAAAGGGCTTTGCTATAACAATGGGAGGCAAATGGTCAAAAGGTTGTATAAGTGGATGGCCTGCTGTAAGGGAAAGAATAAGGCAAACTGAGCCAGCAGCAGAAGGGGTAGGAGCAGTGTCTCAAGATTTAGATAGACGTGGAGCAGTCACAATCAATAACATAGCATCTAATAATGCTGACTCCGCCTGGCTGGAAGCACAAGAGGAAGAAGAGGAAGTAGGCTTTCCAGTCAGGCCGCAGGTACCTTTAAGACCAATGACCTATAAGGGAGCTTTTGATCTCAGCCATTTTTTAAAAGAAAAGGGGGGACTGGAAGGGTTAATTTACTCCAAGAAAAGACAAGAGATCCTTGATCTGTGGGTCTATAACACACAAGGTTACTTCCCTGACTGGCATAACTACACACCAGGGCCAGGGGAGAGATATCCCCTGACCTTTGGATGGTGCTTCAAACTAGTGCCAGTAGATCCACAGGATGTGGAAAAGGCCAATGAAGGAGAGAACAACAGCTTGTTACACCCTATGTGCCAACATGGAATAGAGGATCCAGAGAGAGAAGTACTAATGTGGAAGTTTGACAGTCGACTAGCACTGAGACACAGAGCCAAAGAGCTGCATCCGGAGTTCTACAAAGACTGCTGACACAGAAGTTGCTGACACAGAAGATTCTATACAGGGACTTTCCGCTGGGACTTTCTGGGGAGGTGTGGTCTGGGCGGGACTAGGGAGTGGCTAACCCTCAGATGCTGCATATAAGCAGCTGCTTTTCGCTTGTACTGGGTCTCTCTGGTTAGACCAGATCAGAGCCTGGGAGCTCTCTGGCTAGCTAGGGAACCCACTGCTTAAGCCTCAATAAAGCTTGCCTTGAGGGCGCATGC
>A2.CD.97.97CDKS10.AF286241_H.BE.93.VI997.AF190128
AGCTATAAGAGAGACTTAATTAGGAAAAGCAGGATTTGTCACTGACAGAGGAAGACAAAAAATTGTCTCCCTGACGGAGACAACAAATCAAAAGACTGAATTACATGCAATCTATTTAGCTTTACAGGATTCAGAATTAGAAGTAAACATAGTAACAGATTCACAGTATGCATTAGGAATCATTCAGGCACAACCAGATAGGAGTGAATCAGAGTTAGTCAATCAAATAATAGAAAAGTTAATAGAAAAAGAGAGGGTCTACCTGTCATGGGTACCAGCACACAAGGGGATTGGAGGAAATGAACAGGTAGACAAATTAGTCAGTTCTGGAATCAGGAAAGTGTTATTTTTAGATGGAATAGATAAAGCTCAAGAAGAACATGAAAGATATCACAGCAATTGGAGAGCCATGGCTCATGACTTTAATCTGCCACCTATAGTAGCAAAAGAAATAGTAGCTAGTTGTGACAAATGTCAGCTAAAAGGGGAAGCCATGCATGGACAAGTAGACTGTAGCCCAGGAATATGGCAACTAGATTGCACACATCTAGAAGGAAAAGTTATCCTGGTAGCAGTCCATGTAGCCAGTGGCTATATAGAAGCAGAAGTCATTCCAGCAGAAACAGGACAGGAAACAGCATACTTTATATTAAAACTAGCAGGAAGATGGCCAGTAAAAGTAATACATACTGACAATGGGTCCAATTTCACCAGTGCAACAGTTAAGGCAGCCTGTTGGTGGGCAGGAGTCCAACAGGAATTTGGAATTCCCTACAATCCCCAAAGTCAAGGAGTAGTGGAATCTATGAACAAAGAATTAAAGAAAATCATAGGGCAAGTAAGAGACCAAGCTGAACACCTTAAGACAGCAGTACAAATGGCAGTATTCATCCACAATTTTAAAAGAAAAGGGGGGATTGGGGGATACAGTGCAGGGGAAAGAATAATAGACATAATAGCAACAGATATACATACTAAAGAATTACATTTACAAATTATGAAAATTTAAAATTTTCGGGTTTATTACAGAGACAGCATAGATCCCATTTGGAAAGGACCAGCAAAACTCCTCTGGAAAGGTGAAGGGGCAGTAGTAATACAAGACAATAGTGAGATAAAGGTAGTACCAAGAAGAAAAGCAAAGATCATTAGGGATTATGGAAAACAGATGGCAGGTGATGATTGTGTGGCAGGTAGACAGGATGAGGATTAGAACATGGAAAAGCTTAGTAAAGTACCATATGTATATTTCAAAGAAAGCTAACAGATGGGTTTATAGACATCATTATGACAGCCCTCATCCAAGGATAAGTTCAGAAGTACACATCCCATTAGGGGATGCTAGGTTAGTTATAACAACATACTGGGGTCTGCATACAGGAGAAAGAGACTGGCATTTAGGCCAGGGAGTCTCCATAGAATGGAGGCAGAAAAGGTATAGCACACAAGTAGACCCTGGCTTGGCAGACCAACTAATTCATACCCATTATTTTGATTGTTTTTCAGAATCTGCCATAAGGGGAGCCATATTAGGACGAGTAGTTAGTCCTAGGTGTGAATATCAAGCAGGACATAACCAGGTAGGATCTCTACAGTATTTGGCACTGACAGCATTAGTTGCACCAAAAAAGACAAAGCCACCTTTGCCTAGTGTTAAAAAGCTAGTAGAGGATGGATGGAACAAGCCCCAGAAGACCAGGGGCCACAGAGGGAGCCACACAATGAATAGACACTAGAGCTTTTAGAGGAGCTTAAGAGTGAAGCTGTCAGGCATTTTCCTAGAGACTGGCTCCATCAATTAGGACAGCATATCTATAATACCTATGGAGATACTTGGGGAGGAGTCGAGGCTTTAATAAGAACTCTGCAACAACTACTGTTTATTCATTTCAGAATTGGGTGCCATCATAGCAGAATAGGCATTATTCGACAGAGAAGAGTAAGAAATGGACCCAGTAGATCCTAACCAAGAGCCCTGGAACCATCCAGGAAATCAGCCTAAAACTCCTTGTAACAATTGTTATTGTAAACAGTGCAGCTTTCATTGCCAATTGTGCTTTTTAAAGAAAGGCTTAGGCATTTCCTATGGCAGGAAGAAGCGGAGCCGGCGACGAGCAACTCCCGCAAGTGTGCAAGATCATCAAAATCATATACCAAAGCAGTAAGTATCCTGCATGTATATAATAGGAATAGGAATAGGAGCCCTAATAGTAGCATTTATCATAGCCATAGTAGTGTGGACCATAGTATATATAGAATATAGGAAGTTGGTAAAGCAAAAGAAAATAGACAGGTTAATTCAGAGAATCATAGAAGGAGCAGAAGACAGTGGCAACGAGAGTGATGAGGAATTATCCACAATGGTGGAGAGGGGGCATCTTACTTTTGGGTATGTTGCTGATTTATAGTGCTGCAGGAAACTTGTGGGTTACAGTATATTATGGGGTGCCTGTGTGGAAAGAAGCAAAAACCACTCTATTCTGTGCATCAGATGCTAAGGCATATGAGCCAGAAAAGCATAATGTCTGGGCTACACATGCCTGTGTACCCACAGACCCCAGCCCACAAGAGATGGTCCTGGCAAATGTAACAGAGAACTTTAATATGTGGGACAATGATATGGTAGAGCAGATGCAGACAGACATAATCAGTTTATGGGATCAAAGCTTAAAGCCATGTGTAAAATTAACCCCACTCTGTGTTACTCTAGACTGTAGTAATATAACTAGAAATGATACTAACAGTAGCAGCACTGTCAATGCCACTAGCAGTCCTTCAGCAAATGAATTAACAAATTGCTCTTTCAATGTAACTACTGTAATAAGAGATAAGCAGCAGAGAGTACATGCACTCTTTTATAGACTTGATGTAGTGCCAATTGATGAGACTAGTAATAATAATAATAGTAATAGTACTAAGTACAGGCTAATAAATTGCAATACCTCAGTCATTACACAGGCTTGCCCAAAGGTATCTTTTGATCCCATCCCTATACATTATTGTGCTCCAGCTGGTTTTGCGATTTTAAAGTGTAACAATAAAACGTTTAATGGAACAGGACCATGTACAAATGTCAGCACAGTACAATGTACACATGGAATTAAGCCAGTGGTATCAACTCAACTGCTATTAAATGGAAGCCTAGCAGAAGGACAGGTCATAATTAGATCTAAAAATATCTCAGACAATACCAAAAACATAATAGTACAGCTTGATAGTCCTATAGAAATTACCTGTACCAGACCTAACAATAATACAAGAAAAGGTATACATTTCGGGCCAGGGCAAGCATTCTATGCAACAGGTGATATCATAGGAAACATAAGACAAGCACATTGTAATGTTAGTGAAGAGAAATGGAATAAGACTTTACAACAGATAGCTACACAATTAAGTAAATACTTTGTCAATAGAACATTAATTTTTAAACCACACTCAGGAGGGGACCTGGAAGTTACAACACATAGTTTTAACTGTAGAGGAGAATTTTTCTATTGCAATACATCAGGGCTGTTTAATAGTAGTTGGACTGGGGACAATATTAATATGCCAAATGACACAGGAAAAAATATTACACTGCCATGCAGAATAAAACAAATTGTAAATATGTGGCAGAGAGTAGGACAAGCAATGTATGCTCCTCCCATTAAAGGAAGCATTACATGTGTATCAAATATTACAGGATTAATCCTGACTTATGACGAAGATAAGGGAAATAATGATAATGTTACCTTCAGACCTGGAGGAGGAGATATGAGGGACAATTGGAGAAGTGAATTATATAAATATAAAGTAGTAAAAATTGAACCACTGGGAGTAGCACCCACCGAGGCAAGGAGAAGAGTGGTGGAGAGAGAAAAAAGAGCTGTGGGAATGGGAGCTTTTTTCCTTGGGTTCTTGGGAGCAGCTGGAAGCACTATGGGCGCAGCGTCAATAACGCTGACGGTACAGGCCAGGCAATTATTGTCTGGTATAGTGCAGCAGCAAAGCAATTTGCTAAGAGCTATACAGGCGCAACAGCACATGTTGCAGCTCACGGTCTGGGGTGTTAAACAGCTCCAGGCAAGAGTCCTAGCTGTGGAAAGATACCTAAAGGATCAACAGCTCCTGGGGATTTGGGGTTGCTCTGGAAAACTCATCTGCACCACTAATGTGCCTTGGAACTCTACTTGGAGTAATAAATCTCTGGCTGAAATTTGGGACAACATGACTTGGATGGAGTGGGATAGACAAATTGACAATTACACAGAGGTAATATACAGATTGCTTGAACTCTCGCAAACCCAGCAGGAACAGAATGAACAAGATTTATTAGCATTGGACAAATGGGACAGTTTGTGGAATTGGTTTAGCATAACAAACTGGCTGTGGTATATAAAAATATTCATAATAATAGTAGGAGCTTTGATAGGGTTAAGAATAATTTTTGCTGTGCTTTCTATAGTAGGTAGAGTTAGGCAGGGATACTCACCTTTGTCTTTTCAGACCCTTATCCCGAACCCGCGGGGACCCGACAGGCCCGAAGGAATAGAAGAAGAAGGTGGCGAGCAAGACAGAGGCAGATCCGTGCGATTAGTGAACGGATTCTTACCGATTGTCTGGGACGACCTCCGGAGCCTGTGCCTCTTCAGCTACCGCCTCTTGAGAGACTCACTCTTGATTGTAATAAGGACTGTGGAACTTCTGGGGAGAAGGGGAAGGGAGGCCCTCAAATACCTGTGGAATCTTCTACAGTATTGGGGACAGGAACTAAAGAATAGTGCTATTAATTTGCTTAACACCACAGCAATAGTAGTAGCTGAGGGAACAGATAGAATTATAGAAATAGTGCAAAGAGCTTGGAGAGCTGTTCTCCACATACCTAGAAGAATAAGACAGGGCCTTGAAAGGATTTTGCTATAACAATGGGAGGCAAATGGTCAAAAAGTAGTATAGTTGGGTGGCCTGCTGTAAGGGAAAGAATAAGGCGAGCTCAGCCAGCAGCAGATGGGGTAGGAGCAGTATCTCGAGACTTGGATAGACGAGGGGCAGTCACAATCAATAATACAGCAGCTACTAATCCTGATGTTGCCTGGCTGGAAGCACAAGAGGAGGCGGAGGAAGTAGGCTTTCCAGTCAGGCCCCAGGTACCTTTAAGACCAATGACCTATAAGGCAGCTCTGGATCTCAGCCACTTTTTAAAAGAAAAGGGGGGACTGGATGGGTTAATTTACTCCAAGAAAAGACAAGAGATCCTTGATTTATGGGTCTATAACACGCAAGGCTATTTCCCTGATTGGCAGAACTACACACCAGGGCCAGGGGAGGGATACCCCCTGACCTTTGGGTGGTGTTTCAAGCTAATACCAGTAGATCCACAGGAGGTAGAAAGGGCCAATGAAGGAGAGAACAACTGCCTGCTATACCCTATATGCCAGCATGGAATGGAGGACGAAGAGGGAGAAGTGCTGATGTGGAAGTTTGACAGTCGCCTAGCCTTCACACACACAGCCCGAGAGAAACATCCGGAGTTCTACAAAGACTGCTGATACAGAAGATTCTGACAGGGACTTTCCGCTGGGACTTTCCGGGGAGGCGCGGTCTGGGCGGGGATTGGGAGTGGCTTACCCTCAGATGCTGCATATAAGCAGCTGCTTCTCGCTTGTACGGGGTCTCTTTGGTTAGACCAGATCTGAGCCTGGGAGTTCTCTGGCTGGCCAAGGAACCCACTGCTTAAGCCTCAATAAAGCTTGCCTTGAGGGCGCATGC
>A2.CD.97.97CDKS10.AF286241_J.CD.97.J_97DC_KTB147.EF614151
AGCTATAAGAGAGACTTAATTAGGAAAAGCAGGATTTGTCACTGACAGAGGAAGACAAAAAATTGTCTCCCTGACGGAGACAACAAATCAAAAGACTGAATTACATGCAATCTATTTAGCTTTACAGGATTCAGAATTAGAAGTAAACATAGTAACAGATTCACAGTATGCATTAGGAATCATTCAGGCACAACCAGATAGGAGTGAATCAGAGTTAGTCAATCAAATAATAGAAAAGTTAATAGAAAAAGAGAGGGTCTACCTGTCATGGGTACCAGCACACAAGGGGATTGGAGGAAATGAACAGGTAGACAAATTAGTCAGTTCTGGAATCAGGAAAGTGTTATTTTTAGATGGAATAGATAAAGCTCAAGAAGAACATGAAAGATATCACAGCAATTGGAGAGCCATGGCTCATGACTTTAATCTGCCACCTATAGTAGCAAAAGAAATAGTAGCTAGTTGTGACAAATGTCAGCTAAAAGGGGAAGCCATGCATGGACAAGTAGACTGTAGCCCAGGAATATGGCAACTAGATTGCACACATCTAGAAGGAAAAGTTATCCTGGTAGCAGTCCATGTAGCCAGTGGCTATATAGAAGCAGAAGTCATTCCAGCAGAAACAGGACAGGAAACAGCATACTTTATATTAAAACTAGCAGGAAGATGGCCAGTAAAAGTAATACATACTGACAATGGGTCCAATTTCACCAGTGCAACAGTTAAGGCAGCCTGTTGGTGGGCAGGAGTCCAACAGGAATTTGGAATTCCCTACAATCCCCAAAGTCAAGGAGTAGTGGAATCTATGAACAAAGAATTAAAGAAAATCATAGGGCAAGTAAGAGACCAAGCTGAACACCTTAAGACAGCAGTACAAATGGCAGTATTCATCCACAATTTTAAAAGAAAAGGGGGGATTGGGGGATACAGTGCAGGGGAAAGAATAATAGACATAATAGCAACAGATATACATACTAAAGAATTACATTTACAAATTATGAAAATTTAAAATTTTCGGGTTTATTACAGAGACAGCATAGATCCCATTTGGAAAGGACCAGCAAAACTCCTCTGGAAAGGTGAAGGGGCAGTAGTAATACAAGACAATAGTGAGATAAAGGTAGTACCAAGAAGAAAAGCAAAGATCATTAGGGATTATGGAAAACAGATGGCAGGTGATGATTGTGTGGCAGGTAGACAGGATGAGGATTAGAACATGGAACAGTTTAGTAAAACATCATATGTATATTTCAAAGAAAGCTAAAAAGTGGTTCTATAGACATCACTATGAAAGTAGACATCCGAGAGTAAGTTCAGAAGTACACATCCCGTTAGGGGAGGCTACATTAATAGTAAGAACATATTGGGGTCTGCACCCAGGAGAGAAAGAATGGCAATTGGGTCATGGGGTCTCCATAGAATGGAGGCAGAAGAGGTATAGTACACAAATAGACCCTGATCTGGCAGACCATCTAATCCATCTGTATTATTTTGACTGTTTTTCAGAATCTGCCATAAGGAAAGCCATATTAGGAGAAATAGTTAGTCCTAGGTGCGAATATCAAGCAGGACATAACAAGGTAGGATCTCTGCAATATTTGGCATTGAAAGCATTAGTAGTCCCAAACAAGGCAAGGCCACCCTTGCCTAGTGTTAGGAAATTAGTAGAGGATAGATGGAACAAGCCCCGGAAGACCAGGGGCCACCGAGGGAGCCACACAATGAATGGGTGCTAGAACTATTAGAGGAGCTCAAGCAGGAAGCTGTTAGGCATTTCCCTCGGCAGTGGCTACATGGCCTAGGACAACTTATATATAGTACCTATGGGGATACTTGGGAAGGAGTTGAAGCTATAATAAGAACTTTGCAACAACTGCTGTTTGTCCATTTCAGAATTGGGTGCCGACATAGCAGAATAGGCATTTCGAAGAAGAAGAGTAAGGATGGAGCCAGTAGATCCTAAACTAGAGCCCTGGAACCATCCGGGAAGCCAGCCTAAAACTGCTTGTAACAAGTGCTATTGTAAAAAGTGTTGCTATCATTGCCAGCTGTGCTTTTTAAACAAAGGCTTAGGCATCTCCTATGGCAGGAAGAAGCGGAGACCCCGACGAGGACCTTCTCAGAGCAGTAAAGATCATCAAAATCCTATACCAAAGCAGTAAGTAGTGGTAATTAATAATGTAATGTTGTCCTTAGAAATAGCTGCAATAGTAGGACTGGTAGTAGCATTAATCGCAGCAATAGTTGTATGGACTATAGTATTTATAGAATATAGGAAGATTAGGGAGCAAAGGAAAATAGACTGGTTAATCCAAAGAATAAGTGAAAGAGCAGAAGACAGTGGCAATGAGAGTGATGGGGACACAGACGAGTTATCAGCACTTGTGGAGATGGGGAATCTTAATTTTGGGGATGCTAATAATTTGTAAAGCTACAGATTGGTGGGTCACAGTATACTATGGAGTACCTGTGTGGAAAGATGCAGAAACCACCTTATTTTGCGCATCAGATGATAAAGCATATGAGACAGAAGCGCATAATGTCTGGGCCACACATGCCTGTGTACCCACAGACCCCAACCCACAAGAAGTAAACCTAAAAAATGTGACAGAAGATTTTAACATGTGGAAAAATAATATGGTAGAGCAGATGCATGAAGATATAATCAGTCTATGGGATCAAAGCCTAAAGCCATGTGTAAAATTAACCCCTCTCTGTGTCACGTTAAACTGTAGCAATGCCAACACCAATAGCACCAATAGCACTAGCGCCCCTAGCATGGGCCCTGGAGAAATAAAAAACTGTTCTTTTAATGTTACCACAGAAGTAAGAGATAAAGAAAAGAAAGTCTATGCACTGTTTTATAAACTTGATGTAGTACAAATTAATGAAAGTGACAGTAATAGTACAAAGGATAGTACTCAGTATAGACTAATAAATTGTAATACCTCAGCCATCACACAGGCTTGTCCAAAGGTATCCTTTGAGCCAATTCCTATACATTATTGTGCCCCAGCTGGTTTTGCGATTCTAAAGTGTGAGGATCCGAGATTCAATGGAACAGGACCATGCAATAATGTTAGCTCAGTACAATGTACACATGGAATTATGCCAGTAGCATCAACTCAACTGCTGTTGAATGGCAGTCTAGCAGAAAAAGAGGTGATGATTAGATCTGAAAATATTACAAACAATGCCAAAAACATAATAGTACAGTTTAATGAATCGGTACCAATTACTTGTATCAGACCCAACAACAATACGAGAAAAGGTATACCTATTGGACCAGGACAAGTCTTCTATACAAGTGACATAATAGGGGATATAAGACAAGCATATTGTAGTATCAACAAAACAAAATGGGATGCCTCTTTACAAAAGGTAGCTGAACAATTAAGAAAACACTTCCCTAATAAAACAATAAATTTTACCAAACCCTCAGGAGGGGATCTAGAAATTACAACACATAGTTTTAATTGTGGAGGAGAATTTTTCTATTGTAATACAACAAGCCTGTTTAATAGCACATGGAAGAATGGCGCCACCATACAGGAGAATAGCACGGAGACAAATGGAATTATGACTCTCCCATGCAGAATAAAACAAATTGTAAGAATGTGGCAGAGAGTAGGACAAGCAATATATGCCCCTCCCATCGCAGGAAACATCACATGCACATCAAATATTACAGGGTTACTATTGACACGTGATGGGGGAAATACCAAGGAGAGTAATAGTAGTGAGACCTTCAGACCTACAGGAGGAGATATGAAGGACAATTGGAGAAATGAGTTATATAAATATAAAATAGTGAAGGTTGAGCCATTAGGAGTAGCACCCACCAGGGCAAAAAGAAGAGTGGTGGAGAGAGAAAAAAGAGCAATAGTGGGAATGGGAGCTGTGTTCCTTGGGTTCTTGGGAACAGCAGGAAGCACTATGGGCGCAGCGTCAATAGCGCTGACGGTACAGGCCAGACAGTTGTTGTCTGGCATAGTGCAACAGCAAAGCAATTTGCTGAAGGCTATAGAGGCGCAACAGCATCTGTTGAGACTCACTGTCTGGGGCATTAAGCAGCTCCAGGCAAGAATCTTGGCTGTGGAAAGATACCTAAAGGATCAACAGCTCCTAGGGATTTGGGGCTGCTCTGGAAAACTCATCTGCACCACTAATGTGCCCTGGAACTCTAGTTGGAGTAATAAATCCCATGATGAGATTTGGAATAACATGACCTGGGTAGAATGGGAAAGAGAAATTGACAATTACACAAGAATAATATACAATCTAATTGAGGTATCACAAAACCAGCAGGAAAAGAATGAACAAGACTTACTGGCACTGGACAAGTGGACAAGTCTGTGGAGTTGGTTTAAGATATCAAATTGGCTGTGGTATATAAGAATATTCATAATGATAGTAGGAGGCTTAATAGGTTTAAGAATAATCTTTGCTGTGCTTGCTATAGTAAATAGAGTTAGGCAGGGATACTCACCCTTGTCATTACAGACCCTTATCCCAAACCCAACGGGAGTCGACAGGCCAGGAGAAATCGAAGAAGGAGGTGGAGAGCAAGGCAGAACCAGATCGATTCGATTAGTGAGCGGATTCTTAGCGCTTGCCTGGGACGACCTGCGGAGCCTGTGCCTTTTCAGCTACCACCGATTGAGAGACTTCGTCTTGATTGTAGCGAGGACTGTGGAGACTCTGGGACGCAGGGGGTGGGAGATCCTCAAATATCTGGGGAATCTGGTGTGTTATTGGGGGCAGGAACTAAAGAATAGTGCTATTAGTTTGCTTAATGCCACAGCAATAGCAGTAGCTGCAGGAACAGATAGAATCATAGAAATAGTACAAGGGATATTTAGAGCTATCCTACACATACCTAGAAGAATAAGACAGGAACAGCTGGATGGTCTGAGATAAGGGAAAGAATGAGGCGAGCTACTCCTGATGCTCCAGCAGCAGAAGGAGTAGGAGCAGCGTCTCAAGATTTAGATAGGCATGGGGCAATCACAAGCAGCAATACAGTAGAAACAAATAGTGCCTGTGCCTGGCTGGAGGCACAAACAGAAGAGGAGGAGGTAGGCTTTCCAGTCAGACCTCAAGTACCATTAAGACCAATGACTTACAAGGGAGCCTTTGATCTCGGGTTCTTTTTAAAAGAAAAGGGGGGACTGGATGGGTTAATTTACTCCAAGAAAAGACAAGAGATCCTTGATCTGTGGGTCTATAACACACAAGGTTACTTCCCTGACTGGCAAAACTACACGCCAGGGCCAGGGATTAGATACCCATTGACCTTTGGATGGTGCTACAAGCTAGTACCAGTTGATCCAGGGGAAGTAGAAAGGGCCAATGAAGGAGAAGACAACCGCCTGTTACACCCCATCTGCCAGCATGGAATGGAGGATGAAGACAGAGAAGTGTTAATGTGGAAGTTTGACACTTCCCTGGCACGGAGACATATGGCCCGAGAGCTGCATCCGGAGTTTTACAAAAACTGCTGACAAGACTGCTGACAAAGAAGTTTCTAAAGGGGACTTTCCGCTGGGGACTTTCCAGGGAGGTGTGCCTTGGGCGGGGTTGGGGAGTGGCTAACCCTGAAATGCTGCATAAAAGCAGCCGCTTTTCGCTTGTACTGGGTCTCTCTGGTTAGACCAGATC
>A2.CD.97.97CDKTB48.AF286238_J.SE.93.SE7887.AF082394
TTTTTCGAAGCGAAGTACCAGGGAAGTTCTCTCGACGCAAGACTCGGCTTGCTGAGGTGCACACGGCAAGAGGCGAGAAGCGACGGCTGGTGAGTACGCCTAAAATTTTTGACTAGCGGAGGCTAGAAGGAGAGAGATGGGTGCGAGAGCGTCAGTATTGAGCGGCGGAAAATTAGAAGCTTGGGAGAAAATTCGGTTAAGGCCAGGGGGAAAGAAAAAATATAGACTGAAACATTTAGTATGGGCAAGCAGGGAGCTGGAAAAATTCTCAATCAACCCCAGCCTTTTAGAAACAGAAACAGGATGTAGACGAATATTTGGGCAATTACAACCAGCTCTCGAGACAGGAACAGAAGAACTTAGATCATTATATAATACAATAGCAGTCCTCTACTTTGTTCATCAAAAGATAGAGGTAAAAGACACCAAGGAAGCTCTAGATAAAATAGAGGAAGAACAAAACAAATGCAAGCAGAAGACACAGCAGGCAGCAGCTGACACAGGAAGCAGCAGCAGTCAAAATTACAGAGGTAGCAGCAGTCAAAATTACCCTATAGTGCAAAATGCACAAGGGCAAATGGTACACCAGGCCGTGTCACCTAGGACTTTGAATGCATGGGTCAAAGTAGTTGAAGAGAAGGCTTTTAGCCCAGAAGTAATACCCATGTTTACAGCATTATCAGAAGGAGCCACCCCACAAGACTTAAATACTATGCTAAACACAGTGGGGGGACATCAAGCAGCTATGCAAATGTTAAAAGATACCATCAATGAGGAAGCTGCAGAATGGGACAGGTTACATCCAGTACAGGCAGGGCCTATTCCACCAGGCCAGATGAGAGAACCAAGGGGAAGTGACATAGCGGGAGCTACTAGTAACCTTCAGGAACAAATAGGATGGATGACCAGCAACCCACCTATTCCAGTGGGAGAAATCTATAAAAGATGGATAATCCTGGGATTAAATAAAATAGTAAGAATGTATAGCCCTGTCAGCATTTTGGACATAAAACAAGGGCCAAAAGAACCCTTTAGAGACTATGTAGATAGGTTCTTTAAAACTCTCAGAGCTGAGCAAGCTACACAGGAGGTAAAAAATTGGATGACAGACACCTTGCTGGTCCAAAATGCAAACCCAGATTGTAAATCCATCTTGAGGGCATTAGGACCAGGGGCTACATTAGAAGAAATGATGACAGCATGTCAGGGAGTGGGAGGACCCGGCCATAAAGCAAGGGTTTTAGCTGAAGCAATGAGCCAAGTACAAAATACAAACATAATGATACAGAGAGGCAATTTTAAGGGTCAAAAAAGAATTAAGTGTTTCAACTGTGGCAAGGAAGGACACCTAGCTAGAAATTGCAGGGCCCCTAGGAAAAAGGGCTGCTGGAAATGTGGGAAGGAAGGACATCAAATGAAAGACTGCACTGAGAGACAGGCTAATTTTTTAGGGAAAATTTGGCCTTCCAACAAAGGGAGGCCAGGGAATTTTCCTCAGAGCAGGACAGAGCCAACAGCCCCACCAATGGAGGAAGAGATAACCTCCTCGCTGAAGCAGGAGAACAGGGAGCCGTCCACCCCTGCAATTTCCCTCAAATCACTCTTTGGCAACGACCTCTTGTCACAGTGAAAATAGAAGGACAGCTAAGAGAAGCTTTATTAGATACAGGAGCAGATGATACAGTGTTAGAAGACATAAATCTGCCATGGAAATGGAAACCAAAAATGATAGGGGGAATTGGAGGTTTTATCAAAGTAAGACAATATGATCAGATAGTTATAGAAATTTGTGGAAAAAGGGCTATCGGTACAGTATTAGTAGGACCTACACCTGTCAACATAATTGGAAGAAATATGTTGGTTCAGCTTGGTTGTACTCTAAATTTTCCAATTAGTCCTATTGAAACTGTACCAGTAAAATTGAAGCCAGGAATGGATGGTCCAAAGGTCAAACAATGGCCATTGACAGAAGAAAAAATAAAAGCATTAACAGAAATTTGTAAAGAAATGGAAAAGGAAGGGAAAATTTCAAAAATTGGGCCTGAAAATCCATACAACACTCCAGTGTTTGCTATAAAGAAAAAAGACAGCGATAAATGGAGAAAATTAGTAGATTTCAGAGAACTCAATAAGAGAACTCAAGACTTCTGGGAAGTTCAGTTAGGAATACCACACCCAGCGGGATTAAAAAAGAAAAAATCAGTAACAGTATTAGATGTGGGGGACGCATATTTTTCCGTTCCCCTACATGAAGACTTCAGGAAATATACTGCATTCACCATACCTAGTATAAACAATGAGACACCAGGAATTAGGTATCAGTACAATGTACTTCCACAGGGATGGAAAGGATCACCAGCAATATTCCAGAGTAGCATGACAAAAATCCTAGATCCCTTTAGGGCAAGAAATCCAGAGATGGTCATCTACCAATACATGGATGACTTGTATGTAGGATCTGATTTAGAAATAGATCAGCATAGAGCAAAAATAGAGGAGTTAAGGGCTCATTTATTAAGATGGGGATTTACTACACCAGACAAAAAGCATCAGAAAGAACCTCCATTTCTGTGGATGGGATATGAGCTTCATCCTGACAAGTGGACAGTCCAGCCTATAAAGCTGCCAGAAAAAGACAGCTGGACTGTCAATGATATACAGAAATTAGTAGGAAAGTTAAATTGGGCAAGTCAGATTTATGCAGGGATTAAAGTAAGGCAACTGTGTAAACTCCTTAGAGGAACCAAAGCATTAACAGACATAGTACCACTGACTAGAGAAGCAGAATTAGAATTGGAAGAGAACAGGGAGATTCTAAAAGACCCTGTACATGGGGTATATTATGACCCATCAAAAGACTTAATAGCAGAAATACAGAAACAAGGGCAAGGCCAATGGTCATATCAAATTTATCAAGAACCATTTAAAAATCTAAAAACAGGGAAATATGCAAAAAGGAAGTCCACCCACACCAATGATGTAAAACAATTAACAGAAGCAGTACAAAAAATAGCCACAGAAAGCATAGTAATATGGGGAAAGATTCCTAAATTTAGACTACCCATACAAAAAGAAACATGGGAGACATGGTGGACGGAGTGGTGGCAGGCTACCTGGATTCCTGAGTGGGAGTTTGTCAATACCCCTCCTCTAGTAAAACTATGGTACCAGTTAGAAACAGAACCCATAGCAGGAGCAGAAACTTTCTATGTAGATGGGGCAGCTAATAGAGAGACTAAACTAGGAAAGGCAGGGTATGTCACTGATAGAGGAAGACAAAAAATTGTCCCCTTGACAGAGACAACAAATCAAAAGACTGAATTACATGCAATCTATTTGGCTTTACAGGATTCAGGGCTAGAAGTAAACATAGTAACAGATTCACAATATGCATTGGGGATTATACAAGCACAACCAGATAAGAGTGAATCAGAATTAGTCAATCAAATAATAGAGGAGTTAATAAAGAAGGAAAAGGTCTACCTGTCGTGGGTACCAGCACACAAAGGAATTGGAGGAAATGAACAGGTAGATAAATTAGTCAGTTCTGGAATCAGGAAAGTGCTGTTTCTAGATGGGATAGATAAAGCTCAAGAAGATCATGAAAAATATCATAGCAATTGGAGAGCAATGGCTAGTGATTTTAATCTGCCACCTGTAGTAGCAAAAGAGATAGTAGCTAGCTGTGATAAATGTCAGCTAAAGGGGGAAGCCATGCATGGACAAGTAGACTGTAGTCCAGGGATATGGCAATTAGATTGTACACATCTAGAAGGAAAAGTTATCCTGGTAGCAGTTCATGTAGCCAGTGGCTATATAGAAGCAGAAGTTATCCCAGCAGAAACAGGACAGGAAGCAGCATTTTTTATATTAAAATTAGCAGGCAGATGGCCAGTAAAAGTAATACATACAGACAATGGCAGCAACTTCACCAGTGGTGCTGTGAAGGCAGCCTGTTGGTGGGCAGATATCAAGCAGGAATTTGGAATTCCCTACAATCCCCAAAGTCAAGGAGTAGTAGAATCTATGAATAAAGAATTAAAGAAAATCATAGGACAGGTAAGAGAACAAGCTGAACACCTTAAGACAGCAGTACAAATGGCAGTATTCATACACAATTTTAAAAGAAAAGGGGGGATTGGGGGATACAGTGCAGGGGAAAGAATAATAGACATAATAGCAACAGACATACAAACTAGAGAATTACAAAAACAAATTACAAAAATTCAAAATTTTCGGGTTTATTACAGGGACAGCAGAGACCCAATTTGGAAAGGACCAGCAAAACTACCCTGGAAAGGTGAAGGGGCAGTAGTAATACAGGACAATAGTGAAATAAAGGTAGTACCAAGAAGAAAAGCAAAGATCATTAGAGATTATGGAAAACAGATGGCAGGTGATGATTGTGTGGCAGGTAGACAGGATGAGGATTAACACATGGAAAAGTTTAGTAAAGTACCATATGAATGTTTCAAAGAAAGCTAGAAAATGGCTGTATAGGCATCACTATGACAGCAATCATCCAAAAATAAGTTCAGAAGTACACATCCCACTAGGAGAGGCTATATTAGTAATAACAACATATTGGGGTCTGCAGACAGGAGAAAGAGATTGGCACTTGGGTCAGGGAGTCTCCATAGAATGGAGGCAGAGAAGGTACAGAACACAAGTAGACCCTGGCCTGGCAGACCAACTAATTCATATGTGTTACTTTGATTGTTTTTCAGACTCTGCCATAAGGAAGGCCATATTAGGACAAATAGTTAGCCCTAGGTGTGACTACCAAGCAGGACATAACAAGGTAGGATCTCTACAATATCTGGCACTAACAGCATTAATAAGACCAAAAAGGAGAAAGCCACCTTTGCCTAGTGTTCAGAAACTAGTAGAGGATAGATGGAACAAGCCCCAGAAGACCACGGGCCACAGAGAGAGCCATACCATGAATGGACACTAGAGCTTTTGGAGGAGCTTAAAAATGAAGCTGTTAGACACTTTCCTAGGCCATGGCTTCATAGTTTAGGACAGTATATCTATAGCACTTATGGAGATACATGGGAAGGAGTCGAAGCCATAATAAGAATACTGCAACAACTATTGTTTATTCATTTCAGAATCGGGTGCCATCATAGCAGAATAGGCATTATACCACAAAGAAGAGGGAGGAATGGAGCCAGTAGATCCTAACAGAGAGCCCTGGAATCATCCAGGAAGTCAGCCTAAAACTGCTTGTACTAATTGTTATTGTAAAAAGTGTTGCTATCATTGTCAAGTGTGCTTTCTACAGAAGGGCTTAGGCATTTCCTATGGCAGGAAGAAGCGGAGACAGCGACGATCAGCTCCTCCTGGCAGTAAGACTCATCAAGATCTTATACCAAAGCAGTAAGTAAATCAAGTAGCATATGTAATGATACCTTTGCAAATAGCAGCAATAGTAGCATTTATAGTAGCAATTTTCCTTGCAATAGGTATGTGGACTATAGTGTATATAGAATATAAGAAACTGTTAAGACAAAGGAAAATAGATAAGTTAATTGATAGAATAAGAGAAAGAGCAGAAGACAGTGGTAACGAGAGTGATGGAGACACAGAAGAATTGGCAGACCTTGTGGAGAGGGGGCCTCATGATCTTTGGAATGTTAATGATTTGTAAGGCAAAAGAAGACTTGTGGGTCACAGTCTATTATGGGGTACCTGTGTGGAAAGATGCAAAGACCACTTTATTTTGCGCATCTGATGCTAAAGCATATAGTACTGAAAAACATAATGTCTGGGCTACACATGCTTGTGTACCCACAGATCCAAGCCCACAAGAGATGAATCTGCCAAATGTAACAGAAAACTTTAACATGTGGAAAAATGACATGGTAGACCAGATGCAGGAAGATATAATCAGTGTATGGGATGAAAGCTTAAAGCCATGTGTAAAGATAACCCCTCTATGTGTCACTTTAAATTGTAGTAACATCACTAGTAACAGTAATACAACTAGTAACAGTAGTGTAAGTAGTCCTGATATCATGACAAACTGCTCTTTCAATATAACTACAGAAATAAGAAATAAAAGGAAGCAAGAGTACGCGCTTTTCTATAGACAAGATGTAGTACCAATTGATAGTAACAATAAAAATTATATTCTAATAAACTGTAATACCTCAGTCATTAAACAAGCTTGTCCAAAGGTGTCTTTTCAACCAATTCCCATACATTATTGTGCCCCAGCTGGTTTTGCGATTCTAAAATGTAATGATAAGAATTTCAATGGAACAGGATCATGCAAAAATGTCAGTACAGTACAATGTACACACGGAATTAAGCCAGTGGTATCAACTCAACTACTGCTAAATGGCAGTATAGCAGAAGGAGACATAATAATTAGATCTGAAAACATCTCAGACAATGCCAAAAACATAATAGTACAACTTAATAAAACTGTAGAAATTGTGTGTTACAGACCTAATAACAATACAAGGAAAGGTATACACATGGGACCAGGACAAGTGCTCTACGCAACAGGAGAAATAATAGGAAATATAAGAGAAACACATTGTAACATTAGTGAAAGAGATTGGAGTAACACTTTACGTAGAGTAGCTACAAAACTAAGAGAACACTTTAATAAAACAATAAACTTTACATCACCCTCAGGAGGGGATATAGAAATTGTGACACATAGTTTTAATTGTGGAGGAGAATTTTTATATTGTAATACATCAAAACTGTTCAATAGTAGTTGGGATAAGAATAGCATTGAAGCTACAAATGACACAAGTNACGCAACTATCACAATACCATGTAAAATAAAACAAATTGTGAGAATGTGGCAAAGGACAGGACAAGCAATCTATGCCCCTCCCATTGCAGGAAACATTACGTGCACATCAAATATTACAGGATTACTATTGACACGTGATGGAGGAAACAGGGGGAATGGCAGTGAGAATGGCACTGAGACCTTCAGACCTACAGGAGGAAATATGAAGGACAATTGGAGAAGTGAATTATATAAATATAAAGTAGTAGAGATTGAGCCACTAGGAGTAGCACCCACCAAGGCAAAAAGAAGAGTGGTGGAGAGAGAAAAAAGAGCAGTGGGAATAGGAGCTGTGTTCCTTGGGTTCTTGGGAACAGCAGGAAGTACTATGGGCGCAGCGTCAATAACGCTGACGGTACAGGTCAGACAATTGTTGTCTGGCATAGTGCAACAGCAAAGCAATTTGCTGAAGGCTATAGAGGCGCAACAGCATCTGTTGAAACTCACTGTCTGGGGCATTAAGCAGCTCCAGGCAAGAGTCCTGGCTGTGGAAAGATACCTAAAGGATCAACAACTCCTAGGGATTTGGGGCTGCTCTGGAAAACTCATCTGCACCACTAATGTGCCCTGGAATGCTAGTTGGAGTAATAAATCTTATGAGGACATTTGGGAGAACATGACCTGGATACAATGGGAAAGGGAAATTAACAATTACACAGGAATAATATACAGTCTAATTGAAGAAGCACAAAACCAGCAGGAAAATAATGAAAAAGACTTATTGGCATTGGACAAGTGGACAAATTTGTGGAATTGGTTTAACATATCAAACTGGCTGTGGTACATCAAAATATTCATAATGATAATAGGAGGTTTAATAGGTTTAAGAATAATTTTTGCTGTGCTTGCTATAGTAAATAGAGTTAGGCAGGGATACTCACCTTTGTCATTTCAGACCCTTATCCCAAACCCAACGGAAGCCGACAGGCCCGGAGGAATCGAAGAAGGAGGTGGAGAGCAAGGCAGAACCAGATCGATTCGATTAGTGAACGGATTCCTAGCTCTTGCCTGGGACGACCTGCGGAACCTGTGCCTCTTCAGTTACCACCGATTGAGAGACTTCGTCTTGATTGCAGCGAGGACTGTGGGAACTCTGGGACTCAGGGGGTGGGAGATCCTCAAATATCTGGTGAACCTTGTATGGTATTGGGGGCAGGAACTAAAGAATAGTGCTATTAGTTTGCTTAATACCACAGCAATAGCAGTAGCTGAAGGAACAGATAGAATCATAGAAATAGCACAAAGAGCTTTTAGAGCTATTCTTCACATACCTAGAAGAATAAGACAGGGTTTAGAAAGAGCTTTGCTATAAAATGGGGAACAAATGGTCAAAAAGTTGGCCTCAGGTAAGGGAAAGAATGAGGCGAGCTCCCGCTCCAGCAGCAGATGGAGTGGGAGCAGTGTCTCAAGATTTGGCTAAGCATGGGGCAATCACAAGCAGCAATACAGCAGCTACAAATGCTGACTGTGCCTGGCTGGAAGCACAAACAGAGGAGGAGGTAGGATTTCCAGTCAAACCTCAGATACCATTAAGACCAATGACATACAAGGGAGCTGTTGATCTTAGCTTCTTTTTAAAAGAAAAGGGGGGACTGGATGGGTTAATTTACTCCAAGAAAAGACAAGAGATCCTTGATCTGTGGGTTCATAACACACAAGGTTACTTCCCTGACTGGCAAAACTACACACCAGGGCCAGGGATCAGATACCCATTGACATTTGGATGGTGCTACAAGCTAGTACCAGTTGATCCAAGCGAAGTAGAGGAAGCTAATGAAGGAGAAAACAACTGCCTGTTACACCCCATATGCCAGCATGGAATAGAGGATGAAGAAAGAGAAGTGTTACAGTGGAAGTTTGACAGCTCCCTAGCACGGAGACACATAGCCCGAGAGCTGCATCCGGAGTTTTACAAAGACTGCTGACAAAGAAGTTTCTAGCGGGGACTTTCCGCTGGGGACTTTCCAGGGGAGGAGTGGCCTGGGCGGGGTTGGGGAGTGGCTAACCCTCAGATGCTGCATATAAGCAGCTGCTTTTCGCTTGTACTGGGTCTCTCTTGTTAGACCAGATCTGAGCCTGGGAGCTCTCTGGCTAACTAGGGAACCCACTGCTTAAGCCTCAATAAAGCTTGCCTTGAGGGCGCATGCAAGCCG
>A2.CY.94.94CY017_41.AF286237_K.CM.96.MP535.AJ249239
TTGAAAAGCGAAAGTAACAGGGACTCGAAAGCGAAAGTTCCAGAGGAGTTCTCTCGACGCAGGACTCGGCTTGCTGAGGTGCACACGGCAAGAGGCGAGGGGCGGCGACTGGTGAGTACGCCTAATATTTTTGACTAGCAGAGGCTAGAAGGAGAGAGATGGGTGCGAGAGCGTCAATATTAAGCGGGGGAAAATTAGATGCTTGGGAGAAAATTCGGTTAAGGCCAGGGGGAAAGAAAAAATATAGACTGAAACATTTGGTATGGGCAAGCAGGGAGCTGGAGAAATTCTCAATTAACCCTGGCCTTTTAGAAACACCAGAGGGATGTAGACAAATAATAAGGCAGTTACAACCAGCTCTCCAAACAGGAACAGAAGAACTTAAATCATTATATAATACAGTAGTAGTCCTCTACTGGGTACATCAAAGGGTAGATGTAAAAGACACCAAGGAAGCTCTAGATAAAATAGAGGAAGAACAAAACAAGCAGAAAACACAGCATGCAGCAGCTGACACAGGGAACAGCAGCAGTCAAAATTATCCCATAGTGCAAAATGCACAAGGGCAAATGGTACACCAGGCTATATCACCTAGGACGTTGAATGCCTGGGTCAAAGTAGTAGAAGAAAAGGCTTTCAGCCCAGAAGTAATACCTATGTTTACAGCATTATCAGAAGGAGCCACCCCACAAGACTTAAATACTATGCTAAACACAGTGGGGGGACATCAAGCAGCTATGCAAATGTTAAAAGATACCATCAATGAGGAAGCTGCAGAATGGGACAGGGTACATCCAGTACATGCAGGGCCTATTCCACCAGGCCAGATGAGAGAACCAAGGGGAAGTGACATAGCAGGAACTACTAGTACCCTTCAGGAACAAATAGGTTGGATGACCAGCGATCCACCCATCCCAGTGGGAGAAATTTATAAAAGATGGATAATCCTGGGATTAAATAAAATAGTAAGAATGTATAGCCCTGTCAGCATTTTGGACATAAGACAAGGGCCAAAAGAACCCTTTAGAGATTATGTGGATAGGTTCTTTAAAACTCTAAGAGCTGAGCAAGCCACACAGGAGGTAAAAAACTGGATGACGGACACCTTGCTGGTCCAAAATGCGAACCCAGATTGTAGATCCATCTTGAGAGCATTAGGACCAGGGGCCTCATTAGAAGAAATGATGACAGCATGTCAGGGAGTGGGAGGACCCAGCCATAAAGCAAGGGTTTTGGCTGAAGCAATGAGCCATGTACAAAGTACAAATACAAACATAATGATGCAGAGAGGCAATTTTAGGGGTCAAAAAAGAATTAAGTGTTTCAACTGTGGCAAGGAAGGACACCTAGCCAGAAATTGCAGGGCCCCTAGGAAAAAGGGCTGCTGGAAATGTGGAAAGGAAGGACATCAAATGAAAGATTGCACTGAGAGACAGGCTAATTTTTTAGGGAAAATTTGGCCTTCCAACAAAGGGAGGCCAGGAAATTTTCCTCAGAGCAGAACAGAGCCAACAGCCCCACCAGCAGAGAACTTGAGAATGGGGGAAGAGATAACCTCCTCCCTGAAGCAGGAACTGGAGACCAGGGAACCATACAATCCTGCAATTTCCCTCAAATCACTCTTTGGCAACGACCCCTTGTTACAGTAAAGATAGAGGGACAGCTAAAAGAAGCTCTATTAGATACAGGAGCAGATGATACAGTGTTAGAAGAAATAAATTTGCCAGGAAAATGGAAACCAAAAATGATAGGGGGAATTGGAGGTTTTATCAAAGTAAGACAATATGATCAGATAGCTATAGAAATTTGTGGAAAAAGGGCCATAGGTACAGTATTAGTAGGACCTACCCCTGTCAACATAATCGGAAGAAATATGTTGGTTCAGCTTGGTTGTACTTTAAATTTTCCAATTAGTCCTATTGAAACTGTACCAGTAAAATTAAAGCCAGGAATGGATGGTCCAAAGGTTAAACAATGGCCATTGACAGAAGAAAAAATAAAAGCATTAACAGAAATCTGTAAAGAAATGGAAAAGGAAGGAAAAATTTCAAAAATTGGGCCTGAAAATCCATACAACACTCCAGTGTTTGCTATAAAGAAAAAAGACAGCACTAAATGGAGAAAATTAGTAGATTTTAGAGAACTCAATAAGAGAACTCAAGACTTCTGGGAAGTTCAGTTAGGAATACCACATCCAGCAGGATTAAAAAAGAAAAAAGCAGTAACAGTACTTGATGTGGGGGACGCATATTTTTCCGTTCCCTTACATGAAGACTTCAGAAAATATACTGCATTCACCATACCTAGTACCAACAATGAGACACCAGGAGTTAGGTATCAGTACAATGTACTTCCACAGGGATGGAAAGGATCACCAGCAATATTCCAGAGTAGCATGACAAAGATCTTAGAGCCCTTTAGATCAAAGAATACAGAATTAATCATCTACCAATACATGGATGACTTGTATGTAGGATCTGATTTAGAAATAAGCCAGCATAGAGTAAAAATAGAGGAATTAAGGGCTCACTTATTGAAATGGGGATTTTATACACCAGACAAAAAACATCAGAAAGAACCTCCATTTCTTTGGATGGGATATGAGCTTCATCCTGACAAATGGACAGTCCAGCCTATAAAGCTGCCAGAAAAAGACAGCTGGACTGTCAATGATATACAGAAATTAGTAGGGAAATTAAATTGGGCAAGTCAGATTTATGCAGGGATTAAAGTAAAGCAACTGTGTAAACTCCTTAGAGGAGCCAAAGCACTAACAGACATAGTAACACTGACTAAAGAAGCAGAGTTAGAATTAGAAGAGAACAGGGAAATTTTAAAAACCCCTGTACATGGGGTATACTATGACCCATCAAAAGACTTAATAGCAGAAATACAGAAACAAGGGCAAGACCAATGGACATATCAAATTTATCAGGAACCCTTTAAGAATCTGAAAACAGGGAAATATGCAAAAAGGAGGTCCACCCACACTAATGATATAAAACAGTTAACAGAAGCAGTACAAAAAATAACCATGGAAAGCATAGTGATATGGGGAAAGACTCCTAAATTTAAATTACCCATACAAAAGGAAACATGGGAGACATGGTGGGCGGAGTATTGGCAGGCTACCTGGATTCCTGAGTGGGAGTTTGTCAATACCCCTCCTCTAGTAAAACTGTGGTACCAGTTAGAAAAAGAACCCATAGCAGGAGCAGAAACTTTCTATGTAGATGGGGCAGCTAATAGAGAGACTAAACTAGGAAAGGCAGGGTATGTCACTGACAGAGGAAGACAAAAAATTGTCTCCCTGACGGAGACAACAAATCAAAAGACTGAATTACATGCAATCTATTTGGCTTTACAGGATTCAGGATTAGAAGTGAACATAGTGACAGATTCACAGTATGCATTAGGAATCATTCAAGCACAACCAGAAAGGAGTGAATCAGAGATAGTCAATCAAATAATAGAAAAATTAATAGAAAAGGAAAGGGTCTACCTATCATGGGTACCAGCACACAAAGGGATTGGAGGAAATGAACAAGTAGACAAATTAGTCAGTTCTGGAATCAGGAAAGTGCTATTTTTAGATGGGATAGATAAGGCTCAAGAGGAACATGAAAGATATCACAGCAATTGGAGAGCAATGGCTCATGACTTTAATCTACCACCTGTAGTAGCAAAAGAAATAGTAGCTAGCTGTGATAAATGTCAGCTAAAAGGGGAAGCCATGCATGGACAAGTAGACTGTAGTCCAGGAATATGGCAACTAGATTGCACACATCTTGAAGGAAAAGTTATCCTGGTGGCAGTCCATGTGGCCAGTGGCTATATAGAAGCAGAAGTCATCCCAACAGAAACAGGACAGGATACAGCATACTTTATATTAAAACTAGCAGGAAGATGGCCAGTAAAAGTAATACATACAGACAATGGGCCCAATTTCATCAGTGCAACAGTTAAGGCAGCCTGTTGGTGGGCAGGTATCCAACAAGAATTTGGGATTCCCTACAATCCCCAAAGTCAAGGAGTAGTGGAATCTATGAATAAAGAATTAAAGAAAATCATAGGGCAGGTAAGAGATCAAGCTGAACACCTTAAGACAGCAGTACAAATGGCAGTATTCATTCACAATTTTAAAAGAAAAGGGGGGATTGGGGGATACAGTGCAGGGGAAAGAATAATAGACATAATAGCAACAGATATACAAACTAAAGAACTACAAAGACAAATTACAAAAATTCAAAATTTTCGGGTTTATTACAGGGACAGCAGAGATCCAATTTGGAAAGGACCAGCAAAACTCCTTTGGAAAGGTGAAGGGGCAGTAGTAATACAAGACAATAGTGACATAAAGGTAGTACCAAGAAGAAAAGCAAAGATCATTAGGGATTATGGAAAACAGATGGCAGGTGATGATTGTGTGGCAGGTAGACAGGATGAGGATTAGAACATGGAACAGTTTAGTTAAACATCATATGTATATTTCAAGGAAAGCTAAAGGTTGGGTCTATAAACATCACTATGAAAGCAGAAATCCAAGAATAAGTTCAGAAGTACACATCCCGCTAGGGGAGGCTAGAATAATAGTAAGAACATATTGGGGTCTGCACATAGGAGAAAAAGACTGGCACTTGGGTCATGGAGTCTCCATAGAATGGAGGCAAAACAGGTATCATACACAAATAGACCCTGATCTGGCAGACCATCTAATCCATCTGTATTATTTTGACTGTTTTTCAGAATCTGCCATAAGGAAAGCCATAATAGGAGAAATAGTTAGTCCTAGGTGTGAATATCAAGCAGGACATAACAAGGTAGGGTCTCTGCAATATTTGGCATTGAAAGCAGTAGTAGCTTCAACAAGGACAAAGCCACCTTTGCCTAGTGTTAGGAAATTAGTAGAGGATAGATGGAACAAGCCCCAGAAGACCAAGGGCCACAGAGGGAGCCATACAATGAATGGATGTTAGAACTGTTAGAGGAGCTCAAGCAGGAAGCTGTTAGACATTTCCCTAGGCACTGGCTACATGGCCTAGGACAATACATCTATAATACCTATGGGGATACCTGGGAAGGAGTTGAAGCTATAATAAGAATATTGCAACAACTACTGTTTATTCATTTCAGAATTGGGTGCCACCATAGCAGAATAGGCATTATACCACAGAGAAGAGGGAGAAATGGATCCAGTAGATCCTAACATAGAGCCCTGGAACCAACCAGGAAGTCAGCCTAAAACTGCTTGTAACCAGTGCTATTGTAAACGGTGTTGCTATCATTGCCAAATATGCTTTTTAAAGAAGGGCTTAGGCATTTCCAATGGCAGGAAGAAGAGGAGACCCCGACGAACAACTCCTTACAACAGTGAGAACCATCAAGATCCTCTACGAAAGCAGTGAGTAGTGCTAAGTAGTACATGTAATGGTGTCCTTAGCAATTTCAATAGTAGCATTAGTAGTAGCACTAATATTAGCAATAATTGTATGGACCATAGTATATATAGAATATAGGAAATTGGTAAAACAAAAAAGAATAAACTGGTTAATAGATAGAATAAGAGAAAGAGCAGAAGACAGTGGCAATGAGAGTGAGGGGGATGCAGAGGAATTGGCAGACATTGGGGAACTGGGGCATCTTATTCTTGGGAATATTGATAATCTGTAGCAATGCAGACAAATTGTGGGTCACAGTCTATTATGGGGTACCTGTGTGGAAAGAAGCAACACCCACTCTATTCTGTGCATCAGATGCTAAAGCATATGAGAAGGAGGTACATAATGTCTGGGCTACCCATGCCTGTGTACCCACGGACCCCAACCCACAAGAAGTAGAGATGGAAAATGTAACAGAAAACTTTAACATGTGGAAAAATAACATGGTAGAGCAGATGCATACAGATATAATCAGTTTATGGGATGAAAGCCTAAAACCTTGTGTAGAGTTAACCCCTCTCTGTGTCACTTTAAATTGTACTGATTACAAAGGAACCAATAGCACCAATAATGCAACTAGCACTGTGGTAAGCCCAGCAGAAATAAAAAATTGCTCTTTCAATATAACCACAGAAATAAAAGATAAGAAGAAAAAGGAATCTGCACTTTTCTATAGACTTGATGTACTGCCACTTAATGGCGAGGGTAATAACAGTAGTACTGAATACAGGCTAATAAATTGTAATACCTCAACCATTACACAGACTTGTCCAAAAGTAACCTTTGAGCCAATTCCCATACATTATTGTGCCCCAGCTGGCTTTGCGATTCTAAAGTGTAAGGATAAAAGGTTCAATGGGACAGGACCATGTAAAAATGTCAGCACAGTACAATGTACACATGGAATTAAACCAGTGGTATCAACTCAACTGCTGTTAAATGGCAGCCTAGCAGAAGAAGAGATAATAATTAGGTCTGAAAATATTACAGATAATACAAAAAACATAATAGTACAGCTTAATGAAACTGTACAAATTAATTGTACAAGGCCAAACAACAATACAAGAAAAAGTATACATATGGGACCAGGAAAAGCATTCTATACAACAGGTGATATAATAGGAGATATAAGACAGGCACATTGCAACATTAGTGGAGAAAAATGGAACATGACTTTAAGCAGAGTAAAGGAAAAGCTAAAAGAACATTTTAAGAATGGAACAATAACATTTAAACCACCAAACCCAGGAGGAGACCCAGAAATTCTAACGCACATGTTTAATTGTGCAGGAGAATTTTTCTACTGCAATACAACAAAACTGTTTAATGAGACAGGGGAGAATGGTACTATCACACTCCCATGTAGAATAAAGCAGATTATAAACATGTGGCAGAAAGTGGGAAAAGCAATATATGCCCCTCCCATTGCAGGAAGTATTAACTGTAGCTCAAATATTACAGGAATGATATTGACAAGAGATGGTGGTAATAATACTCATAATGAGACCTTCAGACCTGGAGGAGGAGACATGAGGGACAATTGGAGAAGTGAACTGTATAAATATAAAGTAGTACAGATTGAACCACTAGGAATAGCACCCACCAGGGCCAGGAGAAGAGTGGTGCAGAGAGAAAAAAGAGCAGTAGGATTAGGAGCTGTGTTCTTTGGATTCTTGGGAGCAGCAGGAAGCACTATGGGCGCGGCGTCAATAACGCTGACGGTACAGGCCAGACAATTATTGTCTGGTATAGTGCAACAGCAAAGCAATTTGCTGAGAGCTATAGAAGCGCAACAACATCTGTTACAGCTCACGGTCTGGGGCATTAAACAGCTCCGGGCAAGAATCCTGGCTGTAGAAAGATACCTAAAGGATCAACAGCTCCTAGGGATTTGGGGCTGCTCTGGAAAACTCATCTGCACCACTAATGTGCCCTGGAACTCTAGCTGGAGTAATAAATCTTGGGAAGAGATTTGGAACAACATGACCTGGATGGAGTGGGAAAAAGAGATTGGCAATTACTCAGACACAATATATAAGTTAATTGAAGAATCACAAACCCAGCAGGAAAAGAATGAACAAGATTTATTGGCATTGGACAAATGGGCAAGTCTGTGGAATTGGTTTGACATAACAAAATGGCTATGGTATATAAAAATATTCATAATGATAATAGGAGGCTTGATAGGTTTAAGAATAGCTTTTGCTGTGCTTTCTGTAGTAAATAGAGTCAGGCAGGGATACTCACCTTTGTCATTTCAGACCCTTATCCCAACCTCGAGGGGAGCAGACAGACCCGAAGGAATCGAAGAAGAAGGTGGAGAGCAAGACAAAAACAGATCAGTTCGATTAGTGAGCGGCTTCTTAGCGCTTGCCTGGGACGATCTGCGGAACCTGTGCCTCTTCAGCTACCGCCAATTGAGAAACTTAATCTTAATTGTGACGAGGATCCTGGAAAGGGGACTGAGGGGGGGTTGGGAAGCCCTCAAATATCTGTGGAACCTTGTACAGTATTGGAGTCAGGAACTAAAGAATAGTGCCATTAGCTTGCTTAATACCACAGCAATAGCAGTAGCTGGAGGAACAGATAGAATTATAGAAATAGGACAAAGAGCTTTTAGAGCTTTACTTCACATACCTAGAAGAATAAGACAGGGTCTCGAAAGAGCTTTACTATAAAATGGGTGGCAAGTGGTCAAAAAGTAGTATAGTTGGATGGCCTGCTATAAGGGAAAGAATGAGACGAGCACGACCAGCAGCAGACAGGGTGGGAACACAACCAGCAGCAGACGGGGTGGGAGCAGTATCTCAAGACCTGGCTAGACATGGGGCAGTCACAAGCAGCAATACTTCACACAATAATCCTGATTGTGCCTGGCTGGAAGCACAGGAGGAAGAGGAAGTAGGTTTTCCAGTCAGACCTCAGGTACCATTAAGACCAATGACTTATAAGGCAGCTTTTGATCTCGGCTTCTTTTTAAAAGAAAAGGGGGGACTGGATGGGCTAATTTACTCCAAGAAAAGACAAGAAATCCTTGATCTGTGGGTTTATCACACACAAGGTTTCTTCCCTGATTGGCAAAACTACACACCAGGGCCAGGGATCAGATACCCACTGACCTTTGGGTGGTGCTACAAGCTAGTACCAGTTGATCCAGCAGAAGTAGAAGAGACCACAGAAGGAGAGGACAACTGCCTGTTACACCCCATAAACCAGCATGGAATGGAGGATGAACACAGAGAAATATTAATGTGGAAGTTTGACAGTTCCCTAGCACGAAGACACGTAGCCCGAGAGCTGCATCCGGACTACTACAAAGACTGCTGA
>A2.CD.97.97CDKTB48.AF286238_K.CD.97.EQTB11C.AJ249235
TTTTTCGAAGCGAAGTACCAGGGAAGTTCTCTCGACGCAAGACTCGGCTTGCTGAGGTGCACACGGCAAGAGGCGAGAAGCGACGGCTGGTGAGTACGCCTAAAATTTTTGACTAGCGGAGGCTAGAAGGAGAGAGATGGGTGCGAGAGCGTCAGTATTGAGCGGCGGAAAATTAGAAGCTTGGGAGAAAATTCGGTTAAGGCCAGGGGGAAAGAAAAAATATAGACTGAAACATTTAGTATGGGCAAGCAGGGAGCTGGAAAAATTCTCAATCAACCCCAGCCTTTTAGAAACAGAAACAGGATGTAGACGAATATTTGGGCAATTACAACCAGCTCTCGAGACAGGAACAGAAGAACTTAGATCATTATATAATACAATAGCAGTCCTCTACTTTGTTCATCAAAAGATAGAGGTAAAAGACACCAAGGAAGCTCTAGATAAAATAGAGGAAGAACAAAACAAATGCAAGCAGAAGACACAGCAGGCAGCAGCTGACACAGGAAGCAGCAGCAGTCAAAATTACAGAGGTAGCAGCAGTCAAAATTACCCTATAGTGCAAAATGCACAAGGGCAAATGGTACACCAGGCCGTGTCACCTAGGACTTTGAATGCATGGGTCAAAGTAGTTGAAGAGAAGGCTTTTAGCCCAGAAGTAATACCCATGTTTACAGCATTATCAGAAGGAGCCACCCCACAAGACTTAAATACTATGCTAAACACAGTGGGGGGACATCAAGCAGCTATGCAAATGTTAAAAGATACCATCAATGAGGAAGCTGCAGAATGGGACAGGTTACATCCAGTACAGGCAGGGCCTATTCCACCAGGCCAGATGAGAGAACCAAGGGGAAGTGACATAGCGGGAGCTACTAGTAACCTTCAGGAACAAATAGGATGGATGACCAGCAACCCACCTATTCCAGTGGGAGAAATCTATAAAAGATGGATAATCCTGGGATTAAATAAAATAGTAAGAATGTATAGCCCTGTCAGCATTTTGGACATAAAACAAGGGCCAAAAGAACCCTTTAGAGACTATGTAGATAGGTTCTTTAAAACTCTCAGAGCTGAGCAAGCTACACAGGAGGTAAAAAATTGGATGACAGACACCTTGCTGGTCCAAAATGCAAACCCAGATTGTAAATCCATCTTGAGGGCATTAGGACCAGGGGCTACATTAGAAGAAATGATGACAGCATGTCAGGGAGTGGGAGGACCCGGCCATAAAGCAAGGGTTTTAGCTGAAGCAATGAGCCAAGTACAAAATACAAACATAATGATACAGAGAGGCAATTTTAAGGGTCAAAAAAGAATTAAGTGTTTCAACTGTGGCAAGGAAGGACACCTAGCTAGAAATTGCAGGGCCCCTAGGAAAAAGGGCTGCTGGAAATGTGGGAAGGAAGGACATCAAATGAAAGACTGCACTGAGAGACAGGCTAATTTTTTAGGGAAAATTTGGCCTTCCAACAAAGGGAGGCCAGGGAATTTTCCTCAGAGCAGGACAGAGCCAACAGCCCCACCAATGGAGGAGAAGATAACCCCCTCTCTGAGACAGGAAATGAAAGATCAGGAACAGGGTCCTCCTTTAACTTCCCTCAAATCACTCTTTGGCAGCGACCCGTTGTCACAGTAAAAGTAGGGGGACAGTTAAGAGAAGCTCTATTAGATACAGGAGCAGATGATACAGTATTAGAAGAAATAAATTTACCGGGAAAATGGAAACCAAAAATGATAGGGGGAATTGGAGGTTTTATCAAAGTAAGACAATATGATCAAGTATGTATGGAAATTTGTGGGCAAAAGGCTATAGGTACAGTGTTAGTAGGACCTACACCTGTCAACATAATTGGAAGAAACATGTTGACTCAGATTGGGTGTACTTTAAATTTTCCAATTAGTCCTATTGAAACTGTACCAGTAAAATTAAAGCCAGGAATGGATGGCCCAAAGGTTAAACAATGGCCATTGACAGAAGAAAAAATAAAAGCATTAGTAGAGATTTGTACAGAAATGGAAAAAGAAGGAAAAATTTCAAAAATTGGGCCTGAAAATCCATACAACACCCCAGTGTTTGCCATAAAGAAAAAAGACAGTACTAAATGGATAAAATTAGTAGATTTTAGAGAACTCAATAAAAGAACTCCAGACTTCTGGGAAGTTCAATTAGGGATACCACATCCAGCAGGGTTAAAAAAGAAAAAATCAGTAACAGTACTGGATGTAGGGGATGCATATTTTTCAGTCCCTTTAGATAAAGATTTCAGGAAGTATACTGCATTCACTATACCTAGTATTAACAATGAGACACCAGGAATTAGATATCAGTACAATGTACTACCACAGGGATGGAAAGGATCACCAGCAATATTTCAATGTAGCATGACAAAAATCTTAGAGCCCTTTAGAAGGAAAAATCCAGATATGGTTTTATACCAATACATGGATGATTTGTACGTAGGGTCTGACTTAGAAATAGGGCAACATAGAGCAAAAATAGAGGAACTAAGAGAACATCTATTGAGATGGGGATTTACCACACCAGACAAAAAGCATCAGAAAGAACCCCCATTTCTTTGGATGGGGTATGAACTCCATCCTGACAAATGGACAGTGCAGCCTATACAACTGCCAGACAAGGATAGCTGGACTGTCAATGATATACAAAAGTTAGTGGGAAAATTAAATTGGGCAAGTCAAATATTCCCAGGAATTAAAGTAAAACAATTATGTAAACTCCTTAGGGGAGTCAAAGCATTAACAGACATAGTACCACTAACTGCAGAAGCAGAGTTAGAATTAGCAGAGAACAGAGAAATTCTAAAAGAACCAGTGCATGGGGTATACTATGACCCATCAAAAGACTTAATAGCAGAAATACAGAAGCAAGGGCACGGCCAATGGACATATCAAATATATCAAGAGCCATATAAAAATTTGAAAACAGGGAAGTATGCAAGAATAAGGTCTGCCCACACTAATGATGTAAAACAATTAACAGAAGTAGTGCAAAAAGTAGCCATGGAAAGCATAGTAATATGGGGAAAAACTCCTAAATTTAGATTACCCATACAAAAAGAAACATGGGGGACATGGTGGACAGAATATTGGCAGGCCACCTGGATCCCTGAATGGGAGTTTGTCAATACCCCTCCCCTAGTAAAACTATGGTACCAGTTAGAAACAGAACCCATAGTAGGAGCAGAAACTTTCTATGTAGATGGGGCAGCCAATAGGGAAACTAAACAGGGAAAAGCAGGATATGTTACTGACAAAGGAAGACAAAAAGTTATCTCAATAACTGAAACAACAAATCAGAAAACTGAATTACAAGCAATCCATTTAGCTTTACAGGATTCAGGATCAGAAGTAAACATAGTAACAGACTCACAGTATGCATTAGGAATCATTCAAGCACAACCAGATAAAAGTGAATCAGAATTAGTTAATCAAATAATAGAGCAATTAATAAAAAAGGACAGGGTCTACCTATCATGGGTACCAGCACACAAAGGAATTGGAGGAAACGAACAAGTAGATAAATTAGTCAGTTCTGGAATCAGGAAAGTGCTATTTCTAGATGGAATAGATAAGGCTCAAGAAAGAACATGAAAAATATCACAACAATTGGAGAGCAATGGCTAGTGATTTTAATCTGCCACCTGTAGTAGCAAAAGAAATAGTAGCTAGCTGTGATAAATGTCAGCTAAAAGGGGAAGCCATACATGGACAAGTAGACTGTAGTCCAGGGATATGGCAGTTAGATTGTACACATTTAGAAGGAAAAATTATCCTAGTAGCAGTTCATGTAGCTAGTGGCTATATAGAAGCAGAAGTTATCCCAGCAGAAACGGGACAGGAAACAGCCTACTTCATACTAAAATTAGCAGGAAGATGGCCAGTAAGAGTAATACATACAGACAATGGCAGCAATTTCACCAGTGCTGTAGTTAAGGCAGCCTGTTGGTGGGCAGATATCAAGCAGGAATTTGGAATTCCCTACAATCCCCAAAGCCAAGGAGTAGTAGAATCTATGAATAAAGAATTAAAGAAAATCATAGGACAGGTAAGGGAGCAGGCTGAACATCTTAAGACAGCAGTACAAATGGCAGTATTCATTCACAATTTTAAAAGAAAAGGGGGGATTGGGGGGTACAGTGCAGGAGAGAGAATAATAGATATAATAGCAACAGACATACAAACTAAAGAATTACAAAAACAAATTACAAAAATTCAAAATTTTCGGGTTTATTACAGGGACAGCAGAGAACCAATTTGGAAAGGACCAGCAAAGCTCCTCTGGAAAGGTGAAGGGGCAGTAGTAATACAATAGTGAGATAAAGGTAGTACCAAGAAGAAAAGCAAAGATTATTAGGGATTATGGAAAACAGATGGCAGGTGATGATTGTGTGGCAGGTAGACAGGATGAGGATTAATACTTGGAAAAGTTTAGTAAAATACCATATGTATGTTTCAAAGAAGGCTAACAGATGGCGTTATAGACATCACTATGACAGCAATCATCCAAAAATAAGTTCAGAAGTACACATCCCACTAGGGGATGCAGAATTAGTGGTAACAACATATTGGGGTCTGCATACAGGAGAAAGGGAATGGCACTTGGGTCAGGGAGTCTCCATAGAATGGAGGCTAAAGAAGTACAGAACACAAGTAGATCCTGGCCTGGCAGACCAACTAATTCATATATATTATTTTGATTGTTTTTCAGAATCTGCTATAAGGAAAGCCCTATTAGGACATAGAGTTAGTCCTAGGTGTGAATATCAAGCAGGACATACCCAGGTAGGATCCTTACAGTATTTGGCTCTAACAGCATTAATAGCTCCAAAAAAGACAAAACCACCGGTGCCTAGTGTCCAGAAACTAGTAGAAGATAGATGGAACAAGCCCCAGAAGACCAGGGGCCACAGAGGGAGCCATACAATGAGTGGACAATAGAGATTTTAGAGGAGCTTAAGAGAGAAGCTGTTAGACATTTCCCTAGGCCATGGCTCCATGACTTGGGACAGCATATCTATAACAATTATGGGGATACTTGGGAAGGAGTTGAAGCTATAATAAGAATATTACAACAACTACTGTTTATCCATTTCAGAATTGGGTGTCACCATAGCAGAATAGGCATCTTACGACAGAGAAGAGGAGGAAATGGAGCCAGTAGATCCTAACATAGAGCCCTGGAATCAGCCAGGAAGTCAACCTAAAACTGCCTGTAACCAGTGTTATTGTAAAAAGTGTTGCTATCATTGTCAACTATGCTTTTTGCAGAAGGGCTTAGGCATTTGCTATGGCAGGGAGAAGAGGAGACAGCGAACAACAACTCCTTACGCCAGTAAGAATCATAAAGATCCTATACCAAAGCAGTAAGTAGTACCAAGTATTACATGTAATGGTACCTTTAACAGTAGGAATAATAGCATTAGTAGCAGCGCTAATACTAGCAATAATTGTGTGGACCATAGCCTATCTAGAATATAGAAAAGTGGTAAGACAAAAAAGAATAAACTGGTTATTTGATAGAATAAGAGAAAGAGCAGAAGACAGTGGCAATGAGAGCGAGGGAGATACAGAGGAATTGGCAGCACTTGGGGAAACGGGGCATCTTATTCTTGGGGATATTAATAATCTGTAGCGCTGCAAACAACTTGTGGGTCACAGTCTATTATGGGGTACCTGTGTGGAAAGAAGCAACAACCACTCTATTCTGTGCATCAGATGCTAAAGCATATGAAACAGAGGTACATAATGTCTGGGCTACACATGCCTGTGTACCCACGGACCCCAACCCACAAGAAGTAGTTTTGGAAAATGTAACAGAAAATTTTAACATGTGGAAAAATAACATGGTAGAGCAGATGCATACAGATATAATCAGTTTATGGGATGAAAGCCTAAAACCATGTGTAAAGTTAACCCCTCTCTGTGTCACTCTAACTTGTACCAATGTAACTAATAACCGTACCAATGCAAATAAGAACGATACCAATATCAATGCAACTGTGACATCAACTGACGAGATAAAAAATTGCTCTTTCAATATAACCACAGAACTAAAAGATAAGAAAAAGAGAGTGTCTGCACTTTTCTATAAGCTTGATATAGTGCAAATAAAGCAATCTGAAATTAATCAATCTGAATCTGAAGATAGGCTAATAAATTGTAATACCTCAACCGTTACACAGGCCTGTCCAAAGGTATCCTTTGAGCCAATTCCCATACATTATTGTGCTCCAGCTGGCTTTGCGATTCTAAAGTGTAATAATAACACATGCAATGGAACAGGGCCATGCACAAATGTCAGCACAGTACAATGTACACATGGAATTAAACCAGTGGTATCAACTCAATTGCTATTAAATGGCAGCCTAGCAGAAGAAGAGATAATTATTAGGTCTGAAGATATTACAAAGAATACAAAAAACATAATAGTACAGCTTAATGAAGCTGTAGAAATTAATTGTACAAGGCCAAGCAACAATACAAGAAAAAGTATACATATAGGACCAGGAAGAGCATTCTATGCAACAGGTGACATAATAGGAGATATAAGGCAGGCGCATTGTAACATTAGCGGAGGACAGTGGAATAAAACTGTAAACCAAGTAAAGAAAGAATTAGGAAAACACTTTAACAAAACAATAATATTTCAACCATCCTCAGGAGGGGACCCACAAGTCACAAGGCACATTTTTAACTGTAGAGGAGAATTTTCCTACTGTGATACTACAGACACGGTTGATGACACAGAGGAGGAAGAGGATACCACAATCACAATCCCATGTAGGATAAAACAGATAATAAACATGTGGCAGAAAGTGGGGCAAGCAATATATGCCCCTCCCACCGCAGGAAACATTACCTGTAGATCAAATATTACAGGAATGATATTGACAAGAGATGGTGGTAATGACAATAATACTAGGACTGAGGAGACCTTCAGACCTGGAGGAGGAGACATGAGAGACAATTGGAGAAGTGAACTATATAAATATAAAGTAGTACAGATTGAACCACTAGGAATAGCACCCACCAGGGCAAGGAGAAGAGTGGTGCAGAGAGAAAAGAGAGCAGTAGGAATAGGAGCGTTGTTCCTTGGGTTCTTGGGAGCAGCAGGAAGCACTATGGGCGCGGCGTCAATAACGCTGACGGTACAGGCCAGACAATTATTGTCTGGTATAGTGCAACAGCAAAACAATTTGCTGAGAGCTATAGAAGCGCAACAACAAATGTTACAGCTTACGGTCTGGGGCATTAAACAGCTCCGGGCAAGAGTCCTGGCTGTAGAGAGATACCTAAGGGATCAACAGCTCCTAGGAATTTGGGGCTGCTCTGGAAAACTTATCTGCACCACTAATGTGCCCTGGAACTCTAGCTGGAGTAATAAATCTCAGAGTGAGATTTGGGAGAACATGACCTGGATGCAGTGGGAAAAGGAGATTAGTAATCATACAAGCACAATATATAGGTTAATTGAAGAGTCGCAAATCCAACAGGAAAAGAATGAACAAGACTTATTGGCATTGGACAAGTGGGCAAGTCTGTGGAATTGGTTTGACATATCAAACTGGCTATGGTATATAAAAATATTCATAATGATAGTAGGAGGCTTGATAGGTTTAAGAATAGTTTTTACTGTGCTTTCTGTAGTAAATAGAGTCAGGCAGGGATACTCACCTTTGTCATTCCAGACCCTTACCCCAAGCCCGAGGGGACCCGACAGGCCCGAAGGAATCGAAGAAGGAGGTGGAGAGCAAGACAAAGACAGATCCGTGAGATTAGTCAGCGGGTTCTTAGCTCTTGCCTGGGACGATCTACGGAACCTGTGCCTCTTCAGCTACCGCCACTTGAGAGACTTAGTCTTAATTGCGACGAGGATTCTGGACAGGGGACTGAAGGGGAGTTGGGAAGCCCTCAAATACCTGTGGAACCTGATACTGTATTGGGGTCAGGAGATAAAGAATAGTGCCATTAACTTGCTTAATACTACAGCAATAGCAGTAGCTGAAGGAACAGATAGAATCATAGAGATAGTATACAGAGCTTTTAGAGCTTTACTTCACATACCTAGAAGAATAAGACAGGGCTTTGAAAGACTTTTACTATAAAATGGGTGGCAAGTGGTCAAAAAGTAGTATAGTTGGATGGTCTACTGTAAGGGAAAGAATGAGAAAAACACCTCCAGCAGCAGATGGGGTGGGAGCAGTATCTCAAGACCTGGATAAACATGGGGCAGTCACAAGCAGCAATACTGCATTCAATAATCCTGATTGTGCCTGGCTGGAAGCACAGGAAGACGAGGACGTGGGTTTTCCAGTCAGACCTCAGGTACCATTAAGACCAATGACTTTTAAGGGAGCTTTTGATCTGGGCTTCTTTTTAAAAGAAAAGGGGGGACTGGATGGGCTAATTTACTCCAAGAGAAGACAAGAGATCCTTGATCTGTGGGTTTATCATACACAAGGCTTCTTCCCTGATTGGCAAAACTACACACCAGGGCCAGGGATCAGATACCCACTGACCTTTGGATGGTGCTACAAGCTAGTACCAGTTGATCCAAGAGAAGTAGAAGAGGCCACTGAAGGAGAGAACAACTGCCTGTTACACCCTGTAAACCAGCATGGAATGGAGGATGAACACAGAGAAGTATTAAAGTGGAAGTTTGACAGTTCCCTGGCACGAAAACATGTAGCCCGAGAGATGCATCCGGAGTACTACAAAGACTGCTGA
>B.UA.01.01UAKV167.DQ823362_C.ZM.02.02ZM115.AB254148
GCGAGAGCGTCAGTATTAAGCGGGGGAGCATTAGATAAATGGGAAAAAATTCGGTTAAGGCCAGGGGGAAAGAAAAAATATAAATTAAAACATATAGTATGGGCAAGCAGGGAGCTAGAACGATTCGCAGTTAATCCTGGCCTCTTAGAGACATCAGAAGGCTGCAGACAAATACTGGGACAGTTACAACCATCCCTTCAGACAGGATCAGAAGAACTTAAATCATTATATAATACAGTAGCAGTCCTCTATTGTGTACATCAAAAGATAGAGATAAAAGACACCAAAGAAGCTTTAGACAAGATAGAGGAAGAGCAAAACAAAAGCAAGAAAAAGGCACAGCAAGCAGCAGCTGACGCAGCAAACAAAAGCCAAGTCAGCCAAAATTACCCTATAGTGCAGAATCTCCAGGGGCAAATGGTACATCAAGCCCTGTCACCTAGAACTTTAAATGCATGGGTAAAAGTAGTAGAAGAGAAGGCTTTCAGCCCAGAAGTAATACCCATGTTTTCAGCATTATCAGAGGGAGCCACCCCACAAGATTTAAACACCATGCTAAATACAGTGGGGGGACATCAAGCAGCCATGCAAATGTTAAAAGAGACCATCAATGAGGAAGCTGCAGAATGGGATAGATTGCATCCAGTGCATGCAGGGCCTATTGCACCAGGCCAGATGAGAGAACCAAGGGGAAGTGACATAGCAGGAACTACTAGTACCCTTCAGGAACAAATAGCATGGATGACAAATAATCCACCTATCCCAGTAGGAGAAATCTATAAAAGATGGATAATCCTGGGATTAAATAAAATAGTAAGAATGTATAGCCCTGTTAGCATTCTAGACATAAGACAAGGACCAAAAGAACCCTTTAGAGACTATGTAGACCGGTTCTATAAAACTTTAAGGGCTGAGCAAGCTTCACAAGATGTAAAAAATTGGATGACAGAAACCTTGTTGGTCCAAAATGCGAATCCAGATTGTAAGACTATTTTAAAAGCATTGGGACCAGCAGCTACACTAGAAGAAATGATGACAGCATGTCAGGGAGTGGGGGGACCCGGCCATAAAGCAAGAATTTTGGCTGAAGCAATGAGCCAAGTAGCACAACCAGCTACCATAATGATGCAGAGAGGCAATTTTAGGAACCAAAGAAAAACTGTTAAGTGTTTCAACTGTGGCAAAGAAGGGCACATAGCCAAGAATTGCAGGGCCCCTAGGAAAAAGGGCTGTTGGAAATGTGGTAGGGAAGGACACCAAATGAAAGATTGTACTGAGAGACAGGCTAATTTTTTAGGGAAAATCTGGCCTTCCCACAAGGGAAGGCCAGGGAATTTCCTTCAGAGCAGACCAGGGCCAACAGCCCCACGAACAGAGCCAACAGCCCCACCAGAGGAGAGCTTCAGGTTTGGGGAAGAGACAACAACTCCCCCTCAGAAGCAGGAACCGATAGACAAGGAACTGTATCCTTTAGCTTCCCTCAAATCACTCTTTGGCAACGACCCCTCGTCACAATAAAGATAGGGGGGCAACTAAAGGAAGCTCTATTAGATACAGGAGCAGATGATACAGTATTAGAAGAAATGAATTTGCCAGGAAGATGGAAACCAAAAATGATAGGGGGAATTGGAGGTTTTATCAAAGTAAGACAGTATGATCAGATACTCGTAGAAATCTGCGGACACAAAGCTATAGGTACAGTATTAGTAGGACCTACACCTGTCAACATAATTGGAAGAAATCTGTTGACACAGATTGGATGCACTTTAAATTTTCCCATTAGTCCTATTGAAACTGTACCAGTAAAATTAAAGCCAGGAATGGATGGGCCAAAAGTTAAACAATGGCCATTGACAGAAGAAAAAATAAAAGCATTAGTAGAAATTTGTACAGAAATGGAAAAGGAAGGAAAAATTTCAAGAATTGGGCCTGACAATCCATACAATACTCCAGTATTTGCCATAAAGAAAAAAGACAGTACCAAATGGAGAAAATTAGTAGATTTCAGAGAACTTATTAAGAGAACCCAAGACTTCTGGGAAGTTCAATTAGGAATACCACATCCTGCAGGGTTAAAAAAGAAAAAATCAGTAACAGTACTGGATGTGGGTGATGCATACTTTTCAGTTCCCTTAGACAAAGACTTCAGGAAGTACACTGCATTTACCATACCCAGTATAAACAATGAGACACCAGGAATTAGATATCAGTACAATGTGCTTCCACAGGGATGGAAAGGATCACCAGCAATATTCCAAAGTAGCATGACAAGAATCTTAGAGCCTTTTAGAAAACAAAATCCAGACATAGTTATCTACCAATACATGGATGATTTGTATGTAGGATCTGACTTAGAAATAGGGCAGCATAGAACAAAAATAGAGGAACTGAGACAACATCTGCTGAGGTGGGGATTTACCACACCAGACAAAAAACATCAGAAAGAACCTCCGTTCCTTTGGATGGGTTATGAACTCCATCCTGATAAATGGACAGTACAGCCTATAAAGCTGCCAGAAAAAGACAGCTGGACTGTCAATGACATACAGAAGTTAGTGGGAAAATTGAATTGGGCAAGTCAGATTTATGCAGGGATTAAAGTAAAACAATTGTGTAAACTCCTTAGGGGAACCAAAGCACTAACAGAAGTAGTACCACTAACAGAAGAAGCAGAGTTAGAACTGGCAGAAAACAGGGAGATTCTAAAAGAACCAGTACATGGAGTGTATTATGACCCATCAAAAGACTTAATAGCAGAAGTACAGAAGCAAGAGCAAGGTCAATGGACATATCAAATTTATCAAGAGCCATTTAAAAATCTGAAAACAGGAAAGTATGCAAAAATGAGGGGTGCCCACACTAATGATGTAAAACAATTAACGGAGGCAGTGCAAAAAATAGCCATAGAAAGCATAGTAATATGGGGAAAGACTCCTAAATTTAGATTACCCATACAAAAGGAAACATGGGAAACATGGTGGATGGAATATTGGCAAGCCACCTGGATTCCTGAGTGGGAGTTTGTCAATACTCCTCCCTTAGTGAAATTATGGTACCAGTTAGAAACAGAACCCATAGTGGGAGCAGAAACTTTTTATGTAGATGGGGCAGCTAATAGGGAAACTAAATTAGGCAAAGCAGGATATGTTACTGATAGAGGAAGACAAAAGGTTGTTTCCCTAACGGACACAACAAATCAGAAGACTGAGCTACAAGCAATTCATCTAGCTTTGCAGGACTCGGGATTAGAAGTAAACATAGTAACAGACTCACAATATGCATTAGGAATCATTCAAGCACAACCAGATAAGAGTGAATCAGAGTTAGTCAGTCAAATAATAGAGCAGTTAATAAAAAAGGAAAAGGTCTACCTGGCATGGGTACCGGCACACAAAGGAATTGGAGGAAATGAACAAGTAGATAAATTAGTCAGTGCTGGAATCAGGAAAGTACTATTTTTAGATGGAATAGATAAGGCCCAAGACGAACATGAGAAATATCACAGTAATTGGAGAGCAATGGCTAGTGATTTTAACCTGCCACCAGTAGTAGCAAAAGAAATAGTAGCCAGCTGTGATAAATGTCAGCTAAAAGGAGAAGCCATGCATGGACAAGTAGACTGTAGTCCAGGAATATGGCAGCTAGATTGTACACATTTAGAAGGAAAAATTATCCTGGTAGCAGTTCATGTAGCCAGTGGATATATAGAAGCAGAAGTCATTCCAGCAGAAACAGGACAAGAAACAGCATACTTTCTCTTAAAACTAGCAGGAAGGTGGCCAGTAAAAATAGTACATACAGACAATGGCAGCAATTTCACCAGCAACGCGGTTAAGGCCGCCTGTTGGTGGGCAGGGATCAAGCAGGAATTTGGTATTCCCTACAATCCCCAAAGTCAAGGAGTAGTAGAATCTATGAATAAAGAATTAAAGAAAATTATAGGACAGGTAAGAGATCAGGCTGAACATCTTAAGACAGCAGTACAAATGGCAGTATTTATCCACAATTTTAAAAGAAAAGGGGGGATTGGGGGGTACAGTGCAGGGGAAAGAATAGTAGACATGATAGCAACAGATATACAGACTAAAGAACTACAAAAACAAATTACAAAAATTCAAAATTTTCGGGTTTATTACAGGGACAGCAGAGATCCACTTTGGAAAGGACCAGCAAAACTGCTCTGGAAAGGTGAAGGGGCAGTAGTAATACAAGATAATAGTGACATAAAAGTAGTGCCAAGAAGAAAAGCAAAGATCATTAGGGATTATGGAAAACAGATGGCAGGTGATGATTGTGTGGCAAGTAGACAGGATGAGGATTAGAACATGGAACAGTTTAGTAAAACACCATATGTATATTTCAGGGAAAGCTAGGAAATGGTGTTATAAACATCACTATGAAAGCACTAACCCAAGAACAAGTTCAGAAGTACATATCCCACTAGGGGATGCTAAATTAGTAGTAATAACATATTGGGGTCTGCATACAGGAGAAAGAGAATGGCATTTGGGACAAGGAGTCTCCATAGAATGGAGGAAAAAGAAATATAGCACACAAATAGACCCTGACTTAGCAGACCAACTAATTCATCTATATTATTTTGATTGTTTTTCAGGGTCTGCTATAAGGAGTGCCATATTAGGACGTTTAGTTAGTCCTAGTTGTGAATATCAAACAGGACACAGCAAGGTAGGATCTTTACAGTACTTGGCATTAGCAGCATTAGTAAAACCAAAAAGGCAGAAGCCACCTTTGCCTAGTGTTAGGAAACTGACAGAGGATAGATGGAACAAGCCCCAGAAGACCAAGGGCCACCGAGGGAGCCATACAATGCATGGGCACTAGAGCTTTTGGAGGAACTTAAGAGTGAAGCTGTTAGACATTTTCCTAGACCATGGCTCCATAGCTTAGGACAATACATCTATGAAACTTATGGGGATACTTGGGCAGGAGTGGAAGCCATAATAAGAATTCTGCAACAACTGCTGTTTATTCATTTCAGAATTGGATGTCAACATAGCAGAATAGGAATTATTCGACAGAGGAGAGCAAGGAATGGAGCCAGTAGATCCTAGACTAGAGCCCTGGAAGCATCCAGGAAGTCAGCCTAGGACTGCTTGCACCAAATGCTATTGTAAAAAGTGTTGCTTTCATTGCCAAGTTTGTTTCATGACAAAGGGCTTAGGCATCTCCTATGGCAGGAAGAAGCGGAGACAGCGACGAAGACCTCCTCAAGACAGTGAGGCTCATCAAGTACCTCTACCAAAGCAGTAAGTAGTACATGTAATGCAATCCTTACAGACAGCAGCAATAGTAGCATTGATAATAGCATTGATAGTAGTAGCAGTAATAGCAATAGTTGTATGGACCTTAGTGTTAATAGAATATAGGAAAATATTAAGACAAAGAAAGATAGACAGGTTAATTGATAGAATAATAGAAAGAGCAGAAGACAGTGGCAATGAGAGTGAAGGGGATCAGGAAGAATTGTCGACACTTGTGGATATGGGGCACCTTGCTCCTTGGAATATTGATGATCTGTAATGCTACAGACAAATTATGGGTCACAGTCTATTATGGGGTACCTGTGTGGAAAGAAGCAAAAACCACTCTATTTTGTGCATCAGATGCTAAGGCATATCACACAGAGGTACATAATGTTTGGGCCACACATGCCTGTGTACCCACAGACCCTAACCCACAAGAAATAGTAATGGAAAATGTGACAGAAAATTTTAATATGTGGAAAAATAACATGGTAGATCAGATGCATGAGGATATAATCAGTTTATGGGATGAAAGCTTAAAGCCATGCGTAAAAATAGCCCCACTCTGTGTCACTCTAAATTGCACTAATTTGAGGAAGAATGTCACTAATACCAATGGTACCATTACCAGTAATAGTACCAATAATGGTACTAGTTGGGAATACATGGAGGGAGGAGAAATGAAAAATTGCTCTTTCAATGTCACCACAAGCATAGGAAATGAAATGAAGGAAGATTATGCACTTTTTTATAAGCTTGATATAAAGTCAATAAAGAATGATAATACAAGCTATATATTGATAAATTGTAACAACTCAGTCATTACACAGGCTTGCCCAAAGGTAACCTTTGAACCAATTCCCATACATTATTGTGCCCCTGCTGGTTTTGCGATTTTAAAGTGTAATGATAAGAAGTTCAATGGAAAAGGACCATGTACAAATGTTAGCACAGTACAATGTACACATGGAATTAGGCCAGTAGTGTCAACTCAATTACTGTTAAATGGCAGTCTAGCAGAAGGGGACATAGTAATTAGATCTGAAAATTTCACAGACAATGTTAAGACCATAATAGTACAGCTGAATGAATCTATAACAATTAATTGTACAAGACCCAACAACAATACAAGAAAAGGTATACATATAGGACCAGGAGGGACATTTTTTGCAACAGGAGCTATAATAGGAAACATAAGACAAGCACATTGTAACCTCAGTAGGGCACAATGGAATAAAACTTTAGAACAAATAGTTATAAAATTAGGAAAACAATTTAACAGTACAACAATAATCTTTGATCAACAACCCCCAGGAGGGGACCCAGAAATTTTAATGCACACTTTTAATTGTGGAGGGGAATTTTTCTATTGTAATACATCAAAGCTGTTCAATAGTACTTGGAATAATGGTACTTGGACGAGTAATATTGATGAGGGTAATACTACAGGGCCAGACCACATCACACTCCCATGCAGAATAAAACAAATTATAAACAGATGGCAGGAAGTAGGAAAAGCAATATATGCCCCTCCCATCAGCGGACTAATTAGATGTTCATCAAATATTACAGGGATACTATTAGTAAGAGATGGTGGTAATAATAGTAGTAACAACGAGACTTTCAGACCTGGAGGAGGGAATATGAAGGACAATTGGAGAAGTGAATTATATAAATATAAAGTAGTAAAAATTGAGCCATTAGGAGTAGCACCCACCAAGGCAAAGAGAAGAGTGGTGCAGAGAGAAAAAAGAAGTCCAACGCTTGGAGCTCTGTTCCTTGGGTTCTTGGGAGCAGCAGGAAGCACTATGGGCGCAGCGTCAATAACGCTGACGGTACAGGCCAGACAATTATTGTCTGGTATAGTGCAACAGCAGAACAACTTGCTGAGAGCTATTGAGGCGCAACAGCATCTGTTGCAACTCACAGTCTGGGGCATTAAGCAGCTCCAGGCAAGAGTCCTGGCTGTGGAAAGATACTTAGGGGATCAGCAGCTCCTAGGGATTTGGGGTTGCGCTGGAAAACTCATCTGCACCACTACTGTGCCTTGGAATGCTACTTGGAGTAATAAAACTCTGAAGCAGATTTGGGATAACATGACCTGGATGGAGTGGGAGAGAGAAATTAACAATTACACAGACATAATATACAATTTAATTGAACAATCACAAAACCAACAAGAAAAGAATGAACAAGAATTATTGGAATTGGATAAATGGGCAAGTTTGTGGAATTGGTTTAGCATAACAAACTGGCTGTGGTATATAAAGATATTCATAATGATAGTAGGAGGTTTAATAGGTTTAAGAATAATTTTTACTGTATTTTCTATAGTGAATAGAGTTAGGCAGGGATACTCACCATTGTCATTCCAGACCCGCCTCCCAACCCAGAGGGGACCCGACAGGCCCGAAGGAATCGAAGGAGAAGGTGGAGAGCAAGACAGAGACAGATCCGGACCATTAGTGACTGGATTCTTAGCAATCATCTGGGTCGACCTGCGGAGCCTGTGCCTCTTCAGCTACCACCGCTTGAGAGACTTACTCTTGATTGTAGCGAGGATTGTGGAACTTCTGGGACGGAGGGGGTGGGAAGCCCTTAAATATCTGGGAAGTCTTGTGCAATATTGGGGTCTAGAGCTAAAAAAGAGTGCTATTAGCCTGCTTGATTACATAGCAATAACAGTAGCTGAAGGAACAGATAGAATTATAGAAATAGTACAAAGAATTTTTAGAGCTATCCTCCACATACCTACAAGAATAAGACAGGGCTTTGAAGCAGCTTTGCAATAAAATGGGGGCCAAGTGGTCAAAAAGCTGGCCTACAATAAGAGACAGAATGAGAAGGACTGAGCCAAGAAGAGCTGAGCCAGCAGCAGTAGGAGTAGGGGCAGCATCTCAAGACTTAGATAGACATGGGGCACTTACAAGCAGCAACACACCTGCTACTAATGCAGCTTGTGCCTGGCTGGAAGCGCAACAGGAGGACGAAGAGGTAGGCTTTCCAGTCAAACCTCAGGTACCTCTAAGGCCAATGACTTACAAGGCGGCATTTGATCTCAGCTTCTTTTTAAAAGAAAAGGGGGGACTGGAAGGGTTAATTTACTCTAAGCAAAGGCAAGACATCCTTGATTTGTGGGTCTATAACACACAAGGATTCTTCCCTGATTGGCAAAGCTACACACCAGGACCAGGGGTCAGATATCCACTGACCTTTGGATGGTGCTTCAAGCTAGTACCAGTTGACCCAAGGGAAGTGGAAGAAGCCAACGAAGGAGAAAACAACTGTTTGCTACACCCTATGAGCCTGCATGGAATGGAGGATGAGCGCGGAGAAGTGTTACAGTGGAAGTTTGACAGCATGCTAGCACGCAGACACCTGGCCCGCGAGCAACATCCGGAGTTCTACAAAGACTGCTGACACAGGAGGGACTTTCAGCTGGGACTTTCCACTGGGGCGTTCCAGGAGGAGGGGTCTGGGCGGGACCGGGGAGTGGCCAGCCCTCAGATGCTGCATATAAGCAGCTGCTTTTCGCCTGTACTGGGTCTCTCTAGGTAGACCAGATCTGAGCCCGGGAGCTCTCTGGCTATCTGGGGAACCCACTGCTTAAGCCTCAATAAAGCTTGCCTTGAGTGC
>B.TH.99.99TH_C1416.AY945711_C.ZA.03.03ZASK098B1.AY878061
GCGAGAGCGTCAGTATTAAGCGGGGGACAATTAGATAGATGGGAAAGAATTCGGTTAAGGCCAGGGGGAAAGAAAAAATATAGATTAAAACATATAGTATGGGCAAGCAGGGAGCTAGAACGATTCGCAGTTAATCCTGGCCTGTTAGAAACAGCAGAAGGCTGTAGACAAATACTGGGACAGCTACAACCAGCCCTTAAGACAGGATCAGAAGAACTTAGATCATTATTCAATACAGTAGCAACCCTCTATTGTGTACATCAAAGAATAGAGATAAAAGACACCAAGGAAGCTTTAGAGAAGATAGAGGAAGAGCAAAACAAAAGTAAGAAAAAGGAGCAGCAAACAGCAGCTGACACAGGAAACAACAGTCAGGTCAGCCAAAATTACCCTATAGTGCAAAACCTCCAGGGGCAAATGGTACATCAACCCATATCACCTAGAACTTTAAATGCATGGGTAAAAGTAGTAGAAGAGAAGGCTTTTAGCCCAGAAGTAATACCCATGTTTTCAGCATTATCAGAAGGAGCCACCCCACAAGATTTAAACACCATGCTAAACACAGTGGGGGGACATCAAGCAGCCATGCAGATGTTAAAAGAAACCATCAATGAGGAAGCTGCAGAATGGGATAGATTGCATCCAGTGCATGCAGGGCCAGTTGCACCAGGCCAGATGAGAGAACCAAGGGGAAGTGACATAGCAGGAACCACTAGTACTCTTCAGGAGCAAATAGGATGGATGACAAATAATCCACCTATCCCAGTAGGAGAAATCTATAAAAGATGGATTATCCTGGGATTAAATAAAATAGTAAGAATGTATAGCCCTACCAGCATTCTGGACATAAGACAAGGACCAAAGGAACCTTTTAGAGACTATGTAGACCGGTTCTATAAAACTCTAAGAGCCGAGCAAGCTTCACAAGATGTAAAAAATTGGATGACAGAAACCTTGTTGGTCCAAAATGCGAACCCAGATTGTAAGACTATTTTAAAAGCATTGGGACCAGCAGCTACACTAGAAGAAATGATGACAGCATGTCAGGGAGTGGGGGGACCCAGCCATAAAGCAAGAATTTTGGCTGAAGCAATGAGCCAAGTAACAAATTCAGCTACCATAATGATGCAGAGAGGCAATTTTAAGAATCAGAGAAAGACTGTCAAGTGTTTCAATTGTGGCAAAGAAGGGCACATAGCCAGAAATTGCAGGGCCCCTAGGAAAAAGGGCTGTTGGAAATGTGGAAAGGAAGGACACCAAATGAAAGATTGTACTGAGAGACAGGCTAATTTTTTAGGGAAGATCTGGCCTTCCCACAAAGGAAGGCCAGGGAATTTTCTTCAGAGCAGACCAGAGCCAACAGCCCCACCAGAGGAGAGCTTCAGGTTTGGGGAAGAGACAACAACCCCATCTCAGAAGCAGGAGCTGATAGACAAGGAGGGCCTATATCCTTTAGCTTCCCTCAAATCACTCTTTGGCAACGACCCCTCGTCACAATAAAGATAGGGGGGCAATTAAAGGAAGCTCTATTAGATACAGGAGCAGATGATACAGTATTAGAAGAAATGAATTTGCCAGGAAGATGGAAACCAAAAATGATAGGGGGAATTGGAGGTTTTATCAAAGTAAGACAGTATGATCAGATACCCATAGAAATTTGTGGACACAAAGCTATAGGTACAGTATTAGTAGGACCTACACCTGTCAACATAATTGGAAGAAATCTGTTGACTCAGCTTGGTTGCACTTTAAATTTTCCCATTAGTCCTATTGAAACTGTACCAGTAAAATTAAAACCAGGAATGGATGGTCCAAAAGTTAAACAATGGCCATTGACAGAAGAAAAAATAAAAGCATTAGTAGAAATTTGTACAGAAATGGAAAAGGAAGGGAAAATTTCAAAAATTGGGCCTGAAAATCCATACAATACTCCAGTATTTGCCATAAAGAAAAAAGACAGTACTAAATGGAGAAAATTAGTAGATTTTAGAGAGCTTAATAAAAGAACTCAAGAATTCTGGGAAGTTCAATTAGGAATACCACATCCCGCAGGGTTAAAAAAGAAAAAATCTGTAACAGTCCTGGATGTGGGTGATGCATATTTCTCAGTTCCTTTAGATAAAGACTTCAGGAAGTACACTGCATTTACCATACCTAGTGTAAACAATGAGACACCAGGGATTAGATATCAGTACAATGTACTTCCACAGGGATGGAAAGGATCACCAGCAATATTCCAATGTAGCATGACAAAAATCTTAGAGCCTTTTAGAAAACAAAATCCAGACATAGTTATCTATCAATACATGGATGATTTGTATGTAGGATCTGACTTAGAAATAGGGCAGCATAGAACAAAAGTAGAGGAACTGAGACAACATCTGTTGAGGTGGGGATTTACCACACCAGACAAAAAACATCAGAAAGAACCTCCATTCCTTTGGATGGGTTATGAACTCCACCCTGATAAATGGACAGTACAGCCTATAGTGCTGCCAGAAAAAGACAGCTGGACTGTCAATGACATACAGAAGTTAGTGGGAAAGTTAAATTGGGCAAGTCAGATTTATGCAGGGATTAAGGTAAGGGAATTATGTAAACTCCTTAGGGGAACCAAAGCACTAACAGAAGTAATACCACTAACAGAAGAAGCAGAGCTAGAACTGGCAGAAAACAGGGAAATTCTGAGAGAACCAGTACATGGAGTGTATTATGACCCATCAAAAGACTTAATAGCAGAAATACAGAAGCAGGGGCTAGGCCAATGGACATACCAAATTTATCAAGAGCCATATAAAAATCTGAAAACAGGAAAGTATGCAAGAATGAGGGGTGCCCACACTAATGATGTAAAACAATTAACAGAGGCAGTGCAAAAAATAGCCATAGAAAGCATAGTAATATGGGGGAAGACTCCTAAATTTAAACTACCCATACAAAAGGAGACATGGGAAACATGGTGGACAGAGTATTGGCAAGCCACCTGGATTCCTGAGTGGGAGTTTGTCAATACCCCTCCCTTAGTGAAATTATGGTACCAGTTAGAGAAAGAACCCATAGAAGGAGCAGAAACTTTCTATGTAGATGGGGCAGCTAATAGGGAGACTAAATTAGGAAAAGCAGGATATGTTACTAACAAAGGAAGACAAAAAGTTGTCACCCTAACTGACACAACAAATCAGAAGACTGAGTTACAAGCAATTCATTTAGCTTTGCAGGATTCGGGATTAGAAGTAAACATAGTAACAGACTCACAATATGCATTAGGAATTATTCAAGCACAACCAGATAAGAGTGAATCAGAGTTAGTTAGTCAAATAATAGAGCAGTTAATAAAAAAGGAAAAGGTCTACCTGGCATGGGTGCCAGCACACAAAGGAATTGGAGGGAATGAACAAGTAGATAAATTAGTCAGTGCTGGAATCAGGAAAGTACTATTTTTAGATGGAATAGATAAAGCCCAAGAAGAACATGAGAGATATCACTGTAACTGGAGAGCAATGGCTAGTGATTTTAACCTACCACCGGTAGTAGCAAAAGAAATAGTAGCCAGCTGTGATAAATGTCAACTAAAAGGGGAAGCCATACATGGACAAGTGGACTGTAGCCCGGGGGTATGGCAATTAGATTGTGCACATTTAGAAGGAAAAGTCATCCTGGTAGCAGTCCATGTAGCCAGTGGCTACATAGAAGCAGAGGTTATTCCAGCAGAAACAGGACAAGATACAGCATACTATATACTAAAATTAGCAGGAAGATGGCCAGTCAAAGTAATACATACAGACAATGGTAGTAATTTCACCAGTGCTGCAGTCAAGGCAGCCTGTTGGTGGGCAGGTATCCAACAGGAATTTGGAATTCCCTACAATCCCCAAAGTCAGGGAGTAGTAGAATCCATGAATAAAGAATTAAAGAAAATCATAGGGCAAGTAAGAGATCAAGCTGAGCACCTTAAGACAGCAGTGCAAATGGCAGTATTCATTCACAATTTTAAAAGAAAAGGGGGGATTGGGGGGTACAGTGCAGGGGAAAGAATAATAGACATAATAGCAACAGACATACAAACTAAAGAATTACAAAAACAAATTATAAAAGTTCAAAATTTTCGGGTTTATTACAGAGACAGCAGAGACCCTATCTGGAAAGGACCAGCCAAACTACTCTGGAAAGGTGAAGGGGCAGTAGTAATACAAGATAACAGTGACATAAAGGTAGTACCAAGGAGGAAGGCAAAAATCATTAAGGATTATGGAAAACAGATGGCAGGGGCTGATTGTGTGGCAGGTAGACAGGATGAAGATCAGAACATGGAATAGTTTAGTAAAGTACCACATGTATATTTCAAAGAGAGCTAGTGGATGGTTTTACAGACATCATTATGAAAGCAGACATCCAAAAGTAAGTTCAGAAGTACACATACCACTAGGGGGGGCTAGATTAGTAATAACAACATATTGGGGTTTGCAGACAGGAGAAAGAGATTGGCATTTGGGTCATGGAGTCTCCATAGAATGGAGATTGAGAAGGTATAGCACACAAGTAGACCCTGGCCTGGCAGACCAGCTAATTCATCTGTATTATTTTGATTGCTTTGCAGATTCTGCCATAAGAAAAGCCATACTAGGACACATAGTTATTCCTAGGTGTGACTATCAAGCAGGACATAATAAGGTAGGATCCTTACAATACCTGGCACTGACAGCATTAATAAAACCAAAAAAGAGAAAGCCACCTCTGCCTAGTATTAGGAAATTAGTAGAGGATAGATGGAACAACCCCCAGAAGACCAGGGGCCGCAGAGGGAACCTTATAATGAATGGACACTAGAGATTCTAGAGGAACTCAAGCAGGAAGCTGTCAGACATTTTCCTAGAACATGGCTCCATAACTTAGGGCAGTATATCTATGAAACCTATGGGGATACTTGGACAGGAGTCGAAGCTTTAATAAGAGTACTGCAACAACTGCTGTCTATTCATTTCAGAATTGGGTGCCAGCATAGCAGAATAGGCATTTTGCCACAGAGAAGAGCAAGAAATGGAGCCAGTAGATCCTAAACTAGAGCCCTGGAACCATCCAGGAAGTCAGCCTAAGACTCCTTGTACCAAGTGTTATTGCAAAAGATGCTGCTATCATTGTCTAGTTTGCTTTCAGACAAAAGGCTTAGGCATTTCCTATGGCAGGAAGAAGCGGAGACAGCGACGAAACACTCCTCCAAGCAGTGAGGGTCATCAAAATCCTATATCAAAGCAGTAAGTACTCAATAGTGTATGTAATGGTAGATTCACTAGCAAGAGTAGATTATAGATTAGGAGTAGGAGCACTGATAGTAGCAATAATCATAGCAATAATAGTGTGGACCATAGCATATATAGAATATAGAAAATTGTTAAGACAAAGAAAAATAGACTGGTTAGTTAAAAGAATTAGGGAAAGAGCAGAAGACAGTGGCAATGAGAGTGAAGGGGATACAGAGGAGTTGGCAACAATGGTGGATATGGGGCAGCTTAGGCTTTTTGATGCTATTGAGTTGTAATGTGCTGGGGCGGTGGGTCACAGTCTATTATGGGGTACCTGTATGGAGGGAAGCAAAAACTACTCTATTTTGTGCATCAGATGCTGGAGCATATAAGAGAGAAGTGCATAATGTCTGGGCTACACATGCCTGTGTACCCACAGACCCCAATCCACAAGAACTAGTTCTGGACGATGTAACAGAAAATTTTAACATGTGGAAAAATGACATGGTGGATCAGATGCATGAGGATATAATCAGTCTATGGGATGAGAGCCTAAAGCCATGTGTAAAGTTGACCCCACTCTGTGTCACTCTAAACTGTAGTAATTTTATCAGTAATACAGGTAATGTTACGGAAGAAATAAAAAATTGCTCTTTTGATATAACCACAGAAATAAGAGATAGGAAAAAGAAAGAAAGTGCTCTTTTTTATAGACTTGATATAGTACCACTTAACAGTAGCAACTCTGGCAACTATAGTGTGTATAGATTAATAAATTGTAATACCTCAGCCATAAAACAAGCCTGTCCAAAGGTCACTTTTGACCCAATTCCTATACATTATTGTGCTCCAGCTGGTTATGCGATTCTAAAGTGTAATAATAAGACACTCAATGGGACAGGACCATGCAATAATGTCAGCACAGTGCAATGTACACATGGAATTAAGCCAGTGGTATCAACTCGACTACTGTTGAATGGTAGCCTAGCAGAAGGGGAGATAATAATAAGATCTGAAAATCTGGCAAACACTATCAAAACAATAATAGTACACCTTAATGAATCTGCAGAAATTGTGTGCACAAGACCCAACAATAATACAAGGAAAAGTGTGAGGATAGGACCAGGACAAACATTCTATGCAACAGGAGGCATAATAGGAAACATAAGACAAGCATGTTGTAACATCAACAGGACTAAATGGAACATAACTTTAGAAAGGGTAAGGGAGAAATTACAAGAATACTTCCCTAATAACACAATACAATTTGGACCAGCCTCAGGAGGGGACCTAGAAATTACAACACATAGCTTTAATTGTAGAGGAGAGTTTTTCTATTGCAATACATCAGAGCTGTTTAATAATAGTACAAGTAATGCAACTACAAGTAATGCAACTATTACACTCCCATGCAGAATAAAACAAATTATAAACATGTGGCAGGGGGTAGGACGAGCAATGTATGCCCCTCCCATTGCAGGAAACATAACATGTAACTCAAGTATCACAGGACTACTATTGACACGTGATGGAGCAATTAACAATACAGAGACATTCAGACCTGGAGGAGGAGATATGAGGGACAATTGGAGAAGTGAATTATATAAATATAAAGTGGTAGAAATTAAACCATTAGGAGTAGCACCCACTGATGCAAAAAGGAGAGTGGTGGAGAGAGGAAAAAGAACAGTGGGAATAGGAGCTGTGTTCCTTGGGTTCTTGGGAGCAGCAGGAAGCACTATGGGCGCGGCGGCAGTAACGCTGACGGTACAGGCCAGACAACTATTGTCTGGTATAGTGCAACAGCAAAGCAATTTGCTGAGAGCTATAGAGGCGCAACAGCACATGTTGCAACTCACGGTCTGGGGCATTAAGCAGCTCCAGGCAAGAGTCCTGGCCATAGAAAGATACCTAAAGGATCAACAGCTCCTAGGACTTTGGGGCTGCTCTGGAAAACTCATCTGCACCACTGCTGTGCTTTGGAACGACAGTTGGAGTAATAAATCTCAAGAGAATATTTGGGATAATATGACCTGGATGCAGTGGGATAGAGAAATTAGTAATTACACAGACACAATATACAGGTTGCTTGAGGAATCACAAAACCAGCAGGAAAGAAATGAAAAAGATTTACTAGCATTGGACAGCTGGAACAATCTGTGGAATTGGTTTAGCATAACAAATTGGCTGTGGTATATAAAAATATTCATAATGATAGTAGGAGGCTTGATAGGTTTAAGAATAATCTTTGCTGTGCTTTCTATAGTAAATAGAGTTAGGCAGGGATACTCACCTTTGTCATTTCAGACCCTTACCCCAAACCCGAGGGGACCAGACAGGCTCGAAAGAATCGAAGAAGAAGGTGGAGAGCAAGACAAAGACAGATCCATTCGATTAGTGAACGGATTCTTGGCACTTTTCTGGGACGATCTGCGGAGCCTGTGCCTCTTCCTCTACCACCGATTGAGAGACTTCATGTTAATTGCAGCGAGAGCAGCGGAACTTCTGGGATGCAGCAGTCTCAGGGGACTACAGAGGGGGTGGGAAACCCTTAAGTATCTGGGAAATCTTATACAGTATTGGGGTCTAGAGCTAAAAAAGAGTGCTATTAATCTGCTTGATACCATAGCAATAGCAGTAGCTGAGGGAACAGATAGGATTATAGAATTTGTCTGCAACATACTGAGAAGAATAAGACGGGGCTTTGAAGCAGCTTTGTAATAAAATGGGGAGCAAGTGGTCAAAAAGCAGCATAGTTGGATGGCCTACTGTAAGAGAAAGAATGAGAAGAACTGAGCCAGCAGCAGAGGGAGTAGGAGCAGCGTCTCAAGACTTAGATAGATATGGAGCACTTACAAGCAACAACACAGCCCACAATAATGCTGCTTGTGCCTGGTTACAAGCACAAGAGGAGGAAGAAGAAGTAGGTTTTCCAGTCAGGCCTCAGGTGCCTTTAAGACCAATGACTTATAAGGGGGCATTCGATCTCAGCTTCTTTTTAAAAGAAAAGGGGGGACTGGATGGGTTAATTTACTCCAAGAAAAGGCAAGAGATCCTTGATTTGTGGGTCTATAATACACAAGGCTTCTTCCCTGACTGGCAAAACTACACACCGGGACCAGGGGTCAGATATCCACTGACCTTTGGATGGTGTTACAAGCTAGTACCAGTTGACCCAGGGGAAGTAGAAGAGGCCAATAAAGGAGAAAACAACTGTTTGCTACACCCTATGAGCCAGCATGGAATGGATGATGAGGAAAGAGAAGTATTACAGTGGAAGTTTGACAGCAGCCTAGCTCGCAGACATCTGGCCCGTGAGAAACATCCGGAGTATTACAAAGACTGCTGACACAAAGGGACTTTCCGCCCGGGACTTTCCACTGGGCGTTCCGGGAGGTGTGATCTGGGCGGGACTAGGGAGTGGTCACCCCTCAGATGCTGCATATAAGCAGCTGCTTTTCGCCCGTACTGGGTCTCTCTCGGTAGACCAGATCTGAGCCTGGGAGCTCTCTGGCTACTTAGGGAACCCACTGCTTAAGCCTCAATA
>B.US.97.1012_08.AY331285_D.UG.98.98UG57131.AF484505
GATGGGTGCGAGAGCGTCGGTATTAAGCGGGGGAGAATTAGATAAATGGGAGAAAATTCGGTTAAGGCCAGGAGGAAAGAAAWAATATAAACTAAAACATATAGTATGGGCAAGCAGGGAGCTGGAACGATTCGCAGTTAATCCTGGCCTGTTAGAAACATCAGAGGGCTGTAGACAAATACTGGGACAGCTACAACCATCCCTTCAGACAGGATCAGAAGAACTTAGATCATTATATAATACAGTAGCAACCCTCTATTGTGTGCATCAAAAGATAGAGGTAAAAGACACCAAGGAAGCTTTAGAGAAAATAGAGGAAGAGCAAAACAAAAGTAAGAAAAAAGCACAGCAAGAAGCAGCTGACACAGGAAAAAGCAGCCAGGTCAGCCAAAATTACCCTATAGTGCAGAACCTCCAGGGGCAAATGGTACATCAAGCCCTGTCACCTAGAACTTTAAATGCATGGGTAAAAGTAGTAGAAGAGAAGGCTTTCAGCCCAGAAGTAATACCTATGTTTTCAGCATTGTCAGAAGGAGCCACCCCACAAGATTTAAACACCATGCTAAACACAGTGGGGGGACATCAAGCAGCCATGCAAATGTTAAAAGAGACCATCAATGAGGAAGCTGCAGAATGGGATAGAGTGCATCCAGTGCATGCAGGGCCTATTGCACCAGGCCAGATGAGAGAACCAAGGGGAAGTGACATAGCAGGAACTACTAGTACCCTTCAGGAACAAATAGGATGGATGACAAATAATCCACCTATCCCAGTAGGAGAAATCTATAAAAGATGGATAATCTTGGGATTAAATAAAATAGTAAGGATGTATAGCCCCATCAGCATTCTGGACATAAGACAAGGACCAAAGGAATCTTTTAGAGACTATGTAGACCGGTTCTATAAAACTTTAAGAGCCGAGCAAGCTTCACAGGAGGTAAAGAATTGGATGACAGAAACCTTGCTAGTCCAAAATGCGAACCCAGATTGTAAGACTATTTTAAAAGCATTGGGACCAGCAGCTACACTAGAAGAAATGATGACAGCATGTCAGGGAGTGGGAGGACCCGGCCATAAAGCAAGAGTTTTGGCTGAAGCAATGAGCCAAGTAACAGGAACAGCTAACATAATGATGCAGAGAGGCAATTTTAGGAACCAAAGAAAAATTGTTAAGTGTTTCAATTGTGGCAAGGAAGGGCACATAGCCAAAAATTGCAGGGCCCCTAGGAAAAAGGGCTGTTGGAAGTGTGGGAAGGAAGGACATCAAATGAAAGATTGTACTGAGAGACAGGCTAATTTTTTAGGGAAGATCTGGCCTTCCCACAAGGGGAGGCCAGGGAATTTTCCTCAGAGCAGAACAGAGCCAACAGCCCCACCAGAAGAGAGCTTCAGGTTTGGGGAAGAGACAACAACTCCTCCTCAGAAAGAGGAGCCTCCTTTAGTTTCCCTCAGATCACTCTTTGGCAACGACCCCTCGTCACAATAAAGATAGGGGGGCAAACAAAGGAAGCTCTACTAGATACAGGAGCAGATGATACAGTATTAGAAGACATGTGTTTGCCAGGCAGATGGAAACCAAAAATGATAGGGGGAATTGGAGGTTTTATCAAAGTAAGACAGTATGATCAGATACCCCTAGAAATCTGTGGACATAAAGCTATAGGTACAGTATTAGTAGGACCTACACCTGTCAACATAATTGGAAGAAATCTGTTGACTCAGCTTGGTTGCACTTTAAATTTTCCCATTAGTCCTATTGAAACTGTACCAGTAAAATTAAAGCCAGGAATGGATGGCCCAAAAGTTAAACAATGGCCATTGACAGAAGAAAAAATAAAAGCATTAGTAGAAATTTGTACAGAAATGGAAAAGGAAGGGAAAATTTCAAAAATTGGGCCTGAAAATCCATACAATACTCCAGTATTTGCCATAAAGAAAAAAGATAGTACTAAATGGAGAAAATTAGTAGATTTCAGAGAACTTAATAAGAAAACTCAAGACTTCTGGGAAGTTCAATTAGGAATACCACATCCCGCAGGGTTAAAAAAGAAAAAATCAGTAACAGTACTGGATGTGGGTGATGCATATTTTTCAGTTCCCTTAGATCCAGACTTTAGGAAATATACTGCATTTACCATACCTAGTGTAAACAATGAGACACCAGGGATTAGATATCAGTACAATGTGCTGCCACAGGGATGGAAAGGATCACCAGCAGTATTCCAAAGTAGCATGACAAAAATCTTAGAGCCTTTTAGAAAACAAAATCCAGAAATAATTATCTATCAATACATGGATGATTTGTATGTAGGATCTGACTTAGAAATAGGGCAGCATAGAACAAAAATAGAGGAACTAAGACAACATCTGTTGAAGTGGGGATTTACCACACCAGACAAAAAACATCAGAAAGAACCTCCATTCCTTTGGATGGGTTATGAACTCCATCCTGATAAATGGACAGTACAGCCTATAGTGCTGCCAGAAAAAGACAGCTGGACTGTCAATGACATACAGAAGTTAGTGGGAAAACTGAATTGGGCAAGTCAGATTTACCCAGGGATTAAAGTAAAGCAATTATGTAAACTCCTTAGGGGAACCAAAGCACTAACAGAAGTAGTACCTCTAACAGAAGAGGCAGAGCTAGAACTAGCAGAAAACAGGGAGATTCTAAAAGAACCAGTACATGGAGTGTATTATGACCCATCAAAAGACTTAATAGCAGAAGTACAGAAGCAGGAGCAATGCCAATGGACATATCAAATTTATCAAGAGCCATTTAAAAATCTGAAAACAGGAAAATATGCAAGAATGAGGGGTGCCCACACTAATGATGTAAAACAATTAACAGAGGTAGTGCAAAAAATAACCACAGAAAGCATAGTAATATGGGGAAAAACCCCTAAATTTAGACTACCCATACAAAAAGAAACATGGGAAGCATGGTGGACAGAGTATTGGCAAGCCACCTGGATTCCTGAGTGGGAGTTTGTCAATACCCCTCCCTTAGTGAAATTATGGTACCAGTTAGAGAAAGAACCCATAGCAGGAGCAGAAACTTTCTATGTAGATGGGGCAGCTAACAGGGAGACTAAATTAGGGAGAGCAGGATATGTTACTGATAGAGGAAGACAAAGAGTTGTCTCCCTAACTGACACAACAAATCAGAAGACTGAGTTACAAGCAATTCATCTAGCTTTGCAGGATTCGGGATTAGAAGTAAACATAGTAACAGACTCACAATATGCATTAGGAATCATTCAAGCACAACCAGATAAAAGTGAATCAGAGCTAGTCAGTCAAATAATAGAGCAGTTAATAAAAAAGGAAAAGATCTACCTGGCATGGGTACCAGCACACAAAGGGATTGGAGGAAATGAACAGGTAGATAAATTAGTCAGTAATGGAATCAGGAAGGTACTGTTTTTAGATGGAATAGATAAGGCCCAAGAAGACCATGAGAAATATCACAGTAATTGGAGAGCAATGGCTAGTGATTTTAACCTGCCACCTGTAGTAGCAAAAGAAATAGTAGCCAGCTGTGATAAATGCCAGTTAAAAGGAGAAGCCATGCATGGACAAGTAGACTGTAGTCCAGGAATATGGCAACTAGATTGTACACATTTAGAAGGAAAAATTATCCTGGTAGCAGTTCATGTAGCCAGTGGATATATAGAAGCAGAAGTTATTCCAGCAGAGACAGGGCAGGAAACAGCATACTTTCTTTTAAAATTAGCAGGAAGATGGCCAGTAAAAACAATACATACAGACAATGGCAGCAATTTCACCAGTGCTACTGTTAAGGCCGCCTGTTGGTGGGCGGGGATCAAGCAAGAATTTGGTATTCCCTACAATCCCCAAAGTCAGGGAGTAGTAGAATCTATGAATAAAGAATTAAAGAAAATTATAGGCCAGGTAAGAGATCAGGCTGAACATCTTAAGACAGCAGTACAGATGGCAGTATTCATCCACAATTTTAAAAGAAAAGGGGGGATTGGGGGGTACACTGCAGGGGAAAGAATAGTAGACATAATAGCAACAGACATACAAACTCMAGAATTACAAAAACAAATTACAAAAATTCAAAATTTTCGGGTTTATTACAGAGACAACAGAGATCCGCTTTGGAAAGGACCAGCAAAGCTTCTCTGGAAAGGTGAAGGGGCAGTAGTAATACAAGATAATAGTGATATAAAAGTAGTGCCAAGAAGAAAAGCAAAAATCATTAGGGATTATGGAAAACAGATGGCAGGTGATGATTGTGTGGCAAGTAGACAGGATGAGGATTAGAACATGGAAAAGTTTAGTAAAACACCATATGTATACTTCAAAGAAAGCTAAAGGATGGTTTTATAGACATCACTATGAAAGCACTCATCCAAGAATAAGTTCAGAAGTACACATCCCACTAGGGGATGCTAGATTGGTAGTAACAACATATTGGGGTCTGCATACAGGAGAAAGAGACTGGCATTTGGGTCAAGGAGTCTCCATAGAATGGAGGAAAAAGAGATATAGCACACAAGTAGACCCTGACCTAGCAGACCAACTAATTCATCTGTATTACTTTGATTGTTTTTCAGAATCTGCTATAAGAAATGCCATATTAGGACATAGAGTTAGTCCTAGGTGTGAATATCAAGCAGGACATAACAAGGTAGGATCTCTACAGTACTTGGCACTAGTAGCATTAATAAAACCAAAGAAGACAAAGCCACCTTTGCCTAGTGTTAAGAAATTAACAGAGGATAGATGGAACAAGCCCCAGAAGACCAAGGGCCACAGAGGGAGCCATACAATGAATGGACACTAGAGCTTTTAGAGGAGCTTAAGAGTGAAGCTGTTAGACATTTTCCTAGGGTGTGGCTTCATGGGTTAGGGCAACATATCTATGAAACTTATGGGGATACTTGGGCAGGAGTGGAAGCCATAATAAGAATTCTGCAACAACTGATGTTTATTCATTTCAGAATTGGGTGTCAACATAGCAGAATAGGCATTACTCGACAGAGGAGAACAAGAAATGGAGCCAGTAGATCCTAGCCTAGAGCCCTGGAAGCATCCAGGAAGTCAGCCTAAGACTGCTTGTACCACTTGCTATTGTAAAAGGTGTTGCTTTCATTGCCAAGTTTGCTTCATATCAAAAGGCTTAGGCATCTCCTATGGCAGGAAGAAGCGGAGACAGCGACGACGAACTCCTCAAGACAGTAAGACTCATCAAGATCCTCTATCAAAGCAGTAAGTAGTATATGTAATGCACTCTTTACAAATAGCAGCAATAGCAGCATTAGTAATAGTAGCAATAATAGCAATAGTTGTGTGGTCTATAGTATTCATAGAATATAGGAAAATATTAAAACAAAGAAAAATAGATAGGTTAATTGACAGAATAAGAGAAAGAGCAGAAGACAGTGGCAATGAGAGTGAAGGGGATCAGGAAGAATTATCAGCACTTGTGGAGATGGGGCACCATGCTCCTTGGGATATTGATGATCTGTAGTGCTGCAGCACAATTGTGGGTCACAGTCTATTATGGGGTACCTGTATGGAAAGAAGCAACCACCACTCTATTTTGTGCATCAGATGCTAAAGCATATGATACAGAGGTACATAATGTTTGGGCCACACATGCCTGTGTACCCACAGACCCCAACCCACAAGAACTAGTATTGGCAAATGTGACAGAAAATTTTAACATGTGGAATAATACCATGGTAGAACAGATGCATGAGGATATAATCAGTTTATGGGATCAAAGTCTAAAGCCATGTGTAAAATTAACCCCACTCTGTGTTACTTTAAATTGCACTGATGTAACGAATGCTACTAATATCAATGCTACTAATATCAATAATAGTAGCGGGGGAGTGGAGAGTGGAGAAATAAAGAACTGCTCTTTCAACATCACCACAAGCGTAAGAGATAAGGTGCAGAAAGAATATGCACTTTTTTATAAACTTGATATAGTACCAATAACAAATGAGAGTAGCAAATATAGGTTGATAAGTTGTAACACCTCAGTCCTTACACAGGCCTGTCCAAAGGTATCCTTTGAGCCAATTCCCATACATTATTGTGCCCCGGCTGGTTTTGCGATTCTAAAGTGTAACAATGAAACGTTCAATGGGAAAGGACCATGTATAAATGTCAGCACAGTACAATGTACACATGGAATTAGGCCAGTAGTATCAACTCAACTGCTGTTAAATGGCAGTCTAGCAGAAAAAGAGGTAATAATTAGATCTGACAATTTCTCGGACAATGCTAAAAACATAATAGTGCAACTGAAAGAATATGTAAAAATTAATTGTACAAGACCCAACAACAATACAAGAAAAAGTATACATATAGGACCAGGGAGAGCATTTTATGCAACAGGAGAAATAATAGGAAATATAAGACAAGCACATTGTAACATTAGTAGATCAAAATGGAATGACACTTTAAAACAGATAGCTGCAAAATTAGGAGAACAATTTAGGAATAAAACAATAGTCTTTAATCCATCCTCAGGAGGGGACCTAGAAATTGTAACGCACAGTTTTAACTGTGGAGGGGAATTTTTCTACTGTAATACAACAAAACTGTTTAATAGTACTTGGATTAGGGAGGGTAATAATGGTACTTGGAATGGTACTATAGGGTTAAATGACACTGCAGGAAATGACACAATCATACTCCCATGTAAAATAAAACAAATTATAAACATGTGGCAGGAAGTGGGAAAAGCAATGTATGCCCCTCCCATCAGAGGACAAATTAGATGTTCATCAAATATTACAGGGCTGATATTAACAAGAGATGGCGGTAAGGACGATAGTAATGGGAGTGAGATCCTCGAGATCTTCAGACCTGGAGGAGGAGATATGAGGGACAATTGGAGAAGTGAATTATATAAATATAAAGTAGTAAGAATTGAACCATTAGGAGTAGCACCCACCAGGGCAAGGAGGAGAGTGGTGCAAAAAGAAAAAAGAGCAGTGGGATTAGGAGCTATGTTCCTTGGGTTCTTAGGAGCAGCAGGAAGCGCTATGGGCGCAGCGTCAATGACGCTGACGGTACAGGCCAGACAATTACTGTCTGGTATAGTGCAACAGCAGAATAATTTGCTGAGGGCTATTGAGGCGCAACAGCATATGTTGCAACTCACAGTCTGGGGCATCAAGCAGCTCCAGGCAAGAGTCCTAGCTGTGGAAAGATACCTAAAGGATCAACAGCTCCTGGGGATTTGGGGTTGCTCTGGAAAACTCATATGCACCACTGATGTGCCTTGGGATACTAGTKGGAGTAATAAAACTCTGGATGATATTTGGGGTAGTAACATGACCTGGATGGAGTGGGAAAGAGAAATTGACAATTACACAAGCACAATATACACCTTACTTGAAGAAGCACAGTATCAACAGGAAAAGRATGAAAAAGAATTATTGGAATTGGATAAATGGGCAAGTTTGTGGAATTGGTTTGACATAACAAACTGGCTGTGGTATATAAGAATATTCATAATGATAGTAGGAGGCTTGGTAGGTTTAAGAATAGTTTTTGCTGTACTTTCTATAGTAAATAGAATTAGGCAGGGATACTCACCATTATCGTTCCAGACCCACCACCCAGCCCCGAGGGGACCCGACAGGCCCGAAGGAATCGAAGAAGAAGGTGGAGAGAGAGACAGAGACAGATCCGGTCGATTAGTGAACGGATTCTTAGCACTTATCTGGGTCGATCTGCGGAGCCTGTGCCTCTTCAGCTACCACCGCTTGAGAGACTTACTCTTGATTGTAACGAGGATTGTGGAACTTCTGGGACGCAGGGGGTGGGAAGTCCTCAAATATTGGTGGAATCTCCTACAGTATTGGAGTCAGGAACTAAAGAATAGTGCTGTTAGCTTGCTCAATGTCACGGCCATAGCAGTAGCTGAGGGGACAGATAGGATTATAGAAGTAGCACAAAGAATTGGTAGAGCTATCCTCCACATACCTACAAGAATAAGACAGGGCTTAGAAAGGGCTTTGCTATAAGATGGGTGGCAAGTGGTCAAAAAGTAGTCTAGTTGGATGGCCTGCTATAAGGGAAAGAATGAGACGAGCTGAGCCAGCAGCAGTTGGGGTGGGAGCAGTATCCCGAGACCTGGAAAAACATGGAGCAATCACATGTAGCAATACAGCAACTACCAATGCTGATTGTGCCTGGCTAGAAGCACAAGAGGATGAGGGAGTGGGTTTCCCAGTCAGACCTCAGGCACCTTTAAGGCCAATGACTTACAAGGCAGCTGTAGATCTGAGCCATTTTTTAAAAGAAAAGGGGGGACTGGAAGGGTTAGTTTGGTCCCAGAAAAGACAAGATATCCTTGATCCTTGGGTCTACCACACACAAGGCTACTTCCCTGATTGGCACAACTACACACCAGGGCCAGGGATTAGATATCCACTGACCTTTGGATGGTGCTTCGAGCTAGTACCAGTTGATCCAAAGGAAGCAGAAGAGAACACTGAAGGAGAGAACAGCTGCCTGTTACACCCTGAGGCTCAGCATGGAATAGAGGACTCGGAGAGAGAAGTGTTAAAGTGGAGATTTAACAGTCGCCTGGCATTTGAACACAAGGCCCGAGCGCTGCATCCGGAGTACTACAAAGACTGCTGACACCAAGTTTTCTACAAGGGACTTTCCGCTGGGGACTTTCCAGAGGAGGCGTAACATGGGCGGGACGGGGGGTGGCTAACCCTCAGATGCTGCATATAAGCAGCTGCTTTTTGCCTGTACTGGGTCTCTCTTGTTAGACCAGATTTGAGCCTGGGAGCCCTCTGGCTAGCTAGGGAACCCACTGCT
>B.US.94.5082_94.AY835773_D.YE.01.01YE386.AY795903
TGGAAGGGCTAATTTGGTCCCAAAAAAGACAAGAGATCCTTGATCTGTGGATCTACCACACACAAGGCTACTTCCCTGATTGGCAGAACTACACACCAGGGCCAGGGATCAGATATCCACTGACCTTTGGATGGTGCTTCAAGTTAGTACCAGTTGAACCAGAGCAAGTAGAAGAGGCCAAATAAGGAGAGAAGAACAGCTTGTTACACCCTATGAGCCAGCATGGGATGGAGGACCCGGAGGGAGAAGTATTAGTGTGGAAGTTTGACAGCCTCCTAGCATTTCGTCACATGGCCCGAGAGCTGCATCCGGAGTACTACAAAGACTGCTGACATCGAGCTTTCTACAAGGGACTTTCCGCTGGGGACTTTCCAGGGAGGTGTGGCCTGGGCGGGACTGGGGAGTGGCGAGCCCTCAGATGCTACATATAAGCAGCTGCTTTTTGCCTGTACTGGGTCTCTCTGGTTAGACCAGATCTGAGCCTGGGAGCTCTCTGGCTAACTAGGGAACCCACTGCTTAAGCCTCAATAAAGCTTGCCTTGAGTGCTCAAAGTAGTGTGTGCCCGTCTGTTGTGTGACTCTGGTAACTAGAGATCCCTCAGACCCTTTTAGTCAGTGTGGAAAATCTCTAGCAGTGGCGCCCGAACAGGGACTTGAAAGCGAAAGTAAAGCCAGAGGAGATCTCTCGACGCAGGACTCGGCTTGCTGAAGCGCGCACGGCAAGAGGCGAGGGGCGGCGACTGGTGAGTACGCCAAAAATTTTGACTAGCGGAGGCTAGAAGGAGAGAGATGGGTGCGAGAGCGTCCGTATTAAGCGGGGGAGAATTAGATAAATGGGAAAAAATTCGGCTAAAACCAGGGGGAAAGAAAACATATAAATTAAAACATATAGTATGGGCAAGCAGGGAGCTAGAACAATTCGCAGTTAACCCTGGCCTGTTAGAAACATCGAAGGGCTGTAGACAAATACTGGGACAGCTACAACCATCCCTTCAGACAGGATCAGAAGAACTTAGATCATTATATAATACAGTAGCAACCCTCTATTGTGTGCATCAAAGGATAGAGGTAAAAGACACCAAGGAAGCTTTAGACAAGATAGAGGAAGAGCAAAACAAAAGTAAGCAAAAAGCACAGCAAGAAAAAGCACAGCAAGCAGCAGCAGCAGCTGACGCAGGAAAAAACACCCAGGCCAGCCAAAATTACCCCATAGTGCAGAACATTCAGGGGCAAATGGTACATCAGGCCATATCACCTAGAACTTTAAATGCATGGGTAAAAGTAGTAGAAGAGAAGGCTTTCAGCCCAGAAGTAATACCCATGTTTTCAGCATTATCAGAAGGAGCCACCCCACAAGATTTAAACACCATGCTAAACACAGTGGGGGGACATCAAGCAGCCATGCAAATGTTAAAAGAGACCATCAATGAGGAGGCTGCAGAATGGGATAGATTGCATCCCGTGCATGCAGGGCCTATTGCACCAGGCCAGATGAGAGAACCAAGGGGAAGTGACATAGCAGGAACTACTAGTACCCTTCAGGAACAAATAGGATGGATGACAAATAATCCACCTATCCCAGTAGGAGAAATCTATAAAAGATGGATAATCATGGGATTAAATAAAATAGTAAGAATGTATAGCCCTACCAGCATTCTGGACATAAGACAAGGACCAAAGGAACCCTTTAGAGACTATGTAGACCGGTTCTATAAAACTCTAAGAGCCGAGCAAGCTTCACAGGAGGTAAAAAATTGGATGACAGAAACCTTGTTGGTCCAAAATGCGAACCCAGATTGTAAGACTATTTTAAAAGCATTGGGACCAGCAGCTACACTAGAAGAGATGATGACAGCATGTCAGGGAGTGGGAGGACCTGGCCATAAAGCAAGAGTTTTAGCTGAAGCAATGAGCCAAGTAACAAGTTCAGCTAACATAATGATGCAGAGGGGCAATTTTAGAAACCAAAGAAGGATTGTTAAGTGTTTCAATTGTGGCAAAGAAGGACACATAGCCAAAAATTGCAGAGCCCCTAGGAAAAAGGGCTGTTGGAAATGTGGAAAGGAAGGACACCAAATGAAAGATTGTACTGAGAGACAGGCTAATTTTTTAGGGAAAATCTGGCCCTCCCACAAGGGAAGGCCAGGGAATTTTCTTCAGAGCAGACCAGAGCCAACAGCCCCACCAGAAGAGAGCTTCAGGTTTGGAGAAGAGACAACAGCTCCCCCTCAGAAACAGGAGCCGATAGACAAGGAGCTATATCCTTTAGCTTCCCTCAGATCACTCTTTGGCAACGACCCCTCGTCACAATAAAGATAGGGGGGCAGCTAAAGGAAGCTCTATTAGATACAGGAGCAGATGATACAGTATTAGAAGATATGAGTTTACCAGGAAGATGGAAACCAAAAATGATAGGGGGAATTGGAGGTTTTATCAAAGTAAGACAGTATGATCAGATACCCATAGAAATTTGTGGACATAAGGCTATAGGCACAGTATTAATAGGACCTACACCTGTCAACATAATTGGAAGAAATTTGTTGACTCAGATTGGTTGCACTTTAAATTTTCCAATTAGTCCTATTGAAACTGTACCAGTGAGATTAAAGCCAGGGATGGATGGCCCAAAAGTTAAACAATGGCCGTTAACAGAAGAAAAAATAAAAGCACTAACAGAAATTTGTGCAGACATGGAAAAGGAAGGAAAAATTTCAAGAATTGGGCCTGAAAATCCATATAATACTCCAATATTTGCCATAAAGAAAAAAGACAGTACTAAGTGGAGAAAATTAGTAGATTTCAGAGAACTTAATAAGAGAACTCAAGACTTCTGGGAAGTTCAACTAGGAATACCACATCCTGCAGGGCTAAAAAAGAAAAAATCAGTAACAGTACTAGATGTGGGTGATGCATATTTTTCAGTCCCCTTACATGAAGAATTTAGAAAATATACCGCATTCACCATACCTAGTACAAACAATGAGACACCAGGAACTAGATATCAGTACAATGTGCTCCCACAGGGATGGAAAGGATCACCAGCAATATTCCAAAGTAGCATGACAAAAATCTTAGAACCTTTTAGAAAACAAAATCCAGAAGTGGTCATTTATCAATACATGGATGACTTGTATGTAGGATCTGACTTAGAAATAGGGCAGCATAGAATAAAAATAGAGGAATTAAGGGAACACCTATTGAAGTGGGGATTTACCACACCAGACAAAAAGCATCAGAAAGAACCGCCATCTCTTTGGATGGGTTATGAACTCCATCCTGATAAATGGACAGTACAGCCTATAAAACTGCCAGAAAAAGAAAGCTGGACTGTCAATGACATACAGAAGTTAGTGGGAAAATTAAATTGGGCAAGTCAGATTTACCCAGGAATTAAAGTAAGACAATTATGCAAATGCCTTAGGGGAGCCAAAGCACTGACAGAAGTAGTACCACTAACAGAAGAGGCAGAATTAGAACTGGCAGAAAACAGGGAAATTCTAAAAGAACCAGTACATGGAGTGTATTATGACCCATCAAAAGACTTAATAGCAGAAATACAGAAACAAGGGCAAGATCAGTGGACATATCAGATTTATCAAGAACAATATAAAAATCTGAAAACAGGAAAGTATGCAAAAATGAGGGGTGCCCACACTAATGATGTAAAACAATTAACAGAGGCAGTACAAAAAATAGCCCAAGAATGTATAGTGATATGGGGAAAGACTCCTAAATTTAGACTACCCATACAAAAGGAAACATGGGAAACATGGTGGACAGAGTATTGGCAGGCCACCTGGATTCCAGAGTGGGAGTTTGTCAACACCCCTCCTTTAGTTAAATTATGGTATCAGTTAGAGAAGGAACCAATAGCAGGAGCAGAAACTTTCTATGTAGATGGGGCAGCTAGTAGAGAAACTAAAATAGGAAAAGCAGGATATGTTACTGACAGAGGAAGACAGAAAGTTGTCTCTCTAACTGACACAACAAATCAGAAAACTGAATTACAAGCCATTAATCTAGCTTTGCAGGATTCAGGATTAGAAGTAAACATAGTAACAGACTCACAATATGCATTAGGAATCATTCATGCACAACCAGATAAGAGTGAATCAGAGCTAGTCAATCAGATAATAGAGCAGTTAATAAAAAAGGAAAAAGTCTACCTATCATGGGTACCAGCACATAAAGGGATTGGAGGAAATGAACAAGTAGATAAATTAGTCAGTAATGGAGTCAGAAAAATACTATTCTTGGATGGAATAGACAAGGCTCAGGAAGAACATGAGAAATACCACAATAATTGGAGATCAATGGTTGGTGAGTTTAACATACCACCTGTGGTAGCAAAAGAAATAGTAGCTAGCTGTGATAAATGTCAGCTAAAAGGGGAAGCCTTGCATGGACAAGTAGACTGTAGTCCAGGAATATGGCAATTAGATTGTACACATTTAGAAGGAAAGATTATACTGGTAGCAGTCCATGTAGCCAGTGGCTATATAGAAGCAGAAGTTATCCCAGCAGAAACAGGGCAAGAAACAGCTTATTTTCTTTTGAAATTAGCAGGAAGATGGCCAGTAAAGGTAATACATACAGACAATGGTGGCAATTTCATCAGCGCTGCGGTTAAGGCCGCCTGTTGGTGGGCAGGTATCAAGCAGGAATTTGGAATTCCCTACAATCCCCAAAGTCAAGGAGTAGTAGAATCTATGAATAAAGAATTAAAGAAAATTATAGGACAAATAAGAGATCAAGCTGAACATCTTAAGACAGCAGTACAAATGGCAGTATTCATTCACAATTTTAAAAGAAAAGGGGGGATTGGAGGGTACARTGCAGGGGAAAGAATAATAGACATAATAGCAACAGACATACAAACTAAAGAATTACAAAAACAAATCACAAAAATTCAAAATTTTCGGGTTTATTACAGGGACAGCAGAGATCCAATTTGGAAAGGACCAGCAAAACTTCTCTGGAAAGGTGAAGGGGCAGTAGTAATACAAGACAATAGTGAAATAAAGGTAGTACCAAGAAGAAAAGCAAAGATCATTAGGGATTATGGAAAACAGATGGCAGGTGATGATTGTGTGGCAAGTAGACAGGATGAGGATTAGAACATGGAACAGTTTAGTAAAACATCATATGTATGTTTCAAAGAAAGCTCAAGGATGGTTGTATAGACATCACTATGACTGCCTACACCCAAAAATAAGTTCAGAGGTACACATTCCATTAGGAGATGCTAGACTGGTAGTAAAAACATATTGGGGTCTGCATACAGGAGAAAGAGATTGGCATCTGGGTCAGGGAGTCTCCATAGAATGGAGGAAAAGGAGATATAGCACACAAGTAGACCCTGGCCTAGCAGACCAACTAATTCATATATATTATTTTGACTGTTTTGCAGAATCTGCTATAAGGAAAGCCATATTAGGACACGTAGTTACTCCTAGGTGTAATTATCAAGCAGGACATAACAAGGTAGGATCTTTACAGTATTTGGCACTAACAGCATTAATAAAACCAAAAGGGACAAAACCACCTTTACCTAGTGTTAGGAAGCTGACAGAAGACAGATGGAACAAGCCCCAGAGGACCAAGGGCCACAGAGGGAGCCATACAATGAATGGACATTAGAGCTTTTAGAGGAGCTCAAGAGTGAAGCTGTTAGACACTTTCCTAGGCCATGGCTTCATAGCCTGGGACAATATATCTATGATACTTATGGGGATACCTGGACAGGAGTTGAAGCTCTAATAAGAACCCTTCAACAACTACTGTTTATCCATTTCAGAATTGGGTGTCAACATAGCAGAATAGGCATTCTTCGACAGAGAAGAATAAGAAATGGAGCCAGTAGATCCTAGCCTAGAGCCCTGGAACCATCCAGGGAGTCAGCCTAGGACTCCTTGTACTAGTTGCTATTGTAAATGGTGCTGCTATCATTGCCAACTTTGCTTCATGACAAAAGGCTTAGGCATCTCCTATGGCAGGAAGAAGCGGAGACAGCGACGAAGAACTCCTCAAGACAATCAGGCTCATCAAGTTTCTATACCAAAGCAGTAAGTAGTATATGTAATGCAATCTTTAGTGATATTAGCAATAGTAGCATTAGTAGTAGCGCTAATACTAGCAATAATTGTGTGGACTATAGTTTTCATAGAGTGTAGAAGATTAAGAAGGCAAAGAAAAATAGATTGGCTAATTGATAGAATAGCAGAAAGAGCAGAAGACAGTGGCAATGAGAGTGATGGGGATAGAGAGGAATTATCAGCACTTGTGGAGATGGGGCATGATGCTCCTTGGAATGTTGATGACATGTAGTGTTACAGGAGAGCTGTGGGTCACAGTTTATTATGGGGTACCTGTGTGGAAAGAAGCAACCACTACTCTATTTTGTGCATCAGATGCTAAAGGATTCAAAACAGAGGCACATAATATCTGGGCTACACATGCCTGTGTACCAACAGACCCCAACCCACAAGAAATAATACTTAAAAATGTCACAGAAAACTTTAACATGTGGAAAAATAACATGGTGGAGCAGATGCATGAGGATATAATCAGTTTATGGGATCAAAGTCTAAAACCATGTGTAAAATTAACCCCACTCTGTGTCACTTTAAACTGCATTGAATGGACTGGATGGAATACCACTAGTGGCAATAATACCACTAATAATATCACTAATGAGGATATAGGAATGAAAAACTGCTCTTTCAATGTGACCACAGAATTAAGAGATAAGAAGAAGCAAGTACATGCACTTTTTTATAAACTTGATGTGGTACCAATAGATAATAATAATAGTGCTGATACCAGCTATAGATTAATAAATTGCAATACCTCAGCCATTACACAGGCGTGTCCAAAGGTAACCTTTGAACCAATTCCCATACATTATTGTGCCCCAGCTGGATATGCGATTCTAAAATGTAATGATAAGAGGTTTAATGGGACGGGCCTATGCAGGAACGTCAGCACAGTACAGTGCACACATGGGATTAGGCCAGTAGTGTCCACTCAGCTGTTGTTGAATGGCAGCCTAGCAGAAGAAGAAATAATAATTAGATCTGAAAATCTCGCAAATAATGTTAAAAACATAATAGTACAGCTTAATGAGTCTGTAACAATTAATTGTACAAGGCCCTACAATAATACAAGGCAAGGTGTACATATGGGACCAGGGCGAGCACTCTATACAACAAACATAATAGGAAATATAAGAAAAGCACATTGTACTGTTAGTAGAGACGAATGGAATAAAACTTTACAAAAGGTAACTAATAGATTAGAAAAACTTATTAGCAAAACAGTAAAGTTTCAACCATCCTCAGGAGGGGACCCAGAAATTACAACACACAGCTTTAATTGTGGAGGGGAATTTTTCTATTGCAATACATCAGAACTGTTTAATCAAAGTGCATGGGGAAATACAAGTGAGATCACACTCCAATGTAGAATAAAACAAATCATAAACATGTGGCAGGGAGTAGGAAAAGCAATGTATGCCCCTCCCATTGAAGGACTAATCAGGTGTTCATCAAACATTACAGGGCTATTATTGACAAGAGATGGGGGCAATGAAAATAATGAGACCTTCAGGCCTGGAGGAGGAGACATGAGGGACAATTGGAGAAGTGAATTATACAAATATAAAGTAGTAAGAATTGAACCACTAGGTCTAGCACCCACCAGGGCAAAGAGAAGAGTGGTGGAAAGAGAAAAAAGAGCAATAGGACTAGGAGCTTTGTTCCTTGGGTTCTTGGGAGCAGCAGGAAGCACGATGGGCGCAGCGTCACTGACGCTGACGGTACAGGCCAGACAGTTATTGTCTGGTATAGTGCAGCAGCAAAATAATTTGCTGAGGGCTATAGAGGCGCAACAGCACCTGTTGCAACTCACAGTCTGGGGCGTTAAACAGCTCCAGGCAAGAGTCCTGGCTGTGGAAAGCTACCTAAAGGATCAACAGCTCCTAGGAATTTGGGGTTGCTCTGGAAAACACATTTGCACCACTAATGTGCCCTGGAACTCTAGCTGGAGTAATAAAACTCTAGATGAGATTTGGGGTAAAATGACCTGGAGGCAGTGGGAAAAAGAAATTGACAATTACACAGGAGTAATATACAGCTTAATTGAAGAATCGCAAACCCAGCAAGAAAAAAATGAACAAGAACTATTGCAATTGGATAAATGGGCAAGTTTGTGGAATTGGTTTGACATATCAAATTGGCTGTGGTATATAAGATTATTTATAATGATAGTAGGAGGCTTGATAGGTTTAAGGATAGTTTTTGCTGTGCTTTCTTTAGTAAAAAAAGTTAGGCAGGGATATTCACCTCTGTCATTTCAGACCCTCCTCCCAGCCCCGAGGGGACCCGACAGGCCCGAAGGAATAGAAGAAGAAGGTGGAGAGAGAGACAGAGGCAGATCCATTCGATTGGTGAACGGATTCTCAGCACTTATCTGGGACGATCTGAGGAACCTGTGCCTCTTCAGCTACCACCGCTTGAGAGACTTAATCTTAATTGCAACGAGGATTGTGGAGCTTCTGGGACGCAGGGGGTGGGAAGCCATCAAGTACCTGTGGAACCTTCTGCAGTATTGGATTCAGGAACTAAAGAATAGTGCTATTAGTTTGTTTAATACCACAGCAATAGTAGTAGCTGAAGGGACAGATAGGATCATAGAAATAGCACAAAGAGTTGGTAGAGCTATTATTCACATACCCAGAAGAATAAGACAGGGCTTGGAAAGGTTTTTACTATAAAATGGGTGGCAAATGGTCAAAAAGTAGTATAGTTGGATGGCCTGCTATAAGGGAAAGAATAAGAAGAACTGAACCAGCAGCAGAAGGGGTGGGAGCAGCATCTCGGGACCTGGAAAAACATGGGGCAATCACAAGTAGCAATACAGCACAGACTAATAGTGACTGTGCCTGGCTAGAAGCACAAGAAGAGGATAATGCAGTAGGTTTTCCAGTCAGACCTCAGGTACCATTAAGACCAATGACTTACAAAGGAGCTTTAGATCTAAGTCACTTTTTAAAAGAAAAGGGGGGACTGGAAGGGTTAATTTGGTCCCCGAAAAGACAAGAGATCCTTGATCTTTGGATCTACCACACACAAGGCTACTTCCCTGATTGGCAAAACTACACACCAGGGCCAGGGATTAGATATCCACTGACCTTTGGATGGTGCTTCGAGCTAGTACCAGTTGATCCAAAGGAGGTAGAAGAGGACACTGAAGGAGAGAACAGCTGCTTGTTACACCCTATGTGCCAGCATGGAATGGAGGACCAAGAGAAAGAAGTATTAATGTGGAGATTTAACAGCAAGCTAGCATTTGAACACAAGGCCAAAATGCTGCATCCGGAGTTCTACAAAGACTGCTGACACAGAAGTTGCTGACAGGGACTTTCCGCTGGGGACTTTCCAGGGGAGGTGTGGTTTGGGCGGAGTTGGGGAGTGGCTAACCCTCAGATGCTGCATATAAGCAGCTGCTTTTGCCTGTACTGGGTCTCTCTTGTTAGACCAGATTTGAGCCTGAGAGCTCTCTGGCTAGCTAGGGAACCCACTGCTTAA
>B.YE.02.02YE507.AY795904_F1.BE.93.VI850.AF077336
GCGAGAGCGTCAGTATTAAGCGGGGGAAAATTGGATAGATGGGAAAGAATTCGGTTGAGGCCAGGGGGAAACAAAAAGTATAAATTAAAACATATAGTATGGGCAAGCAGGGAGCTAGAACGATTTGCAGTTAACCCTGGTCTATTAGAAACAGCAGAAGGCTGTAGACAAATATTGGGACAGCTACAACCTTCCCTTCAGACAGGATCAGAAGAACTTAAATCATTATTTAATACAGTAGCAGTCCTCTATTGTGTGCATCAACAGATAGATGTAAAAGACACCAAGGAAGCTTTAGACAAGATAGAGGAAGAGCAAAACAAAAGTAAGAAAAAAGCACAGCAAGCAGCAGCTGACACAGGAAGTAGCAGCCAGGTCAGCCAAAATTACCCCATAGTGCAAAACCTTCAGGGGCAAATGGTACATCAGGCCCTGTCACCTAGAACTTTAAATGCATGGGTAAAAGTAATAGAAGAAAAGGCTTTCAGCCCAGAAGTAATACCCATGTTTACAGCATTATCAGAAGGAGCCACCCCACAAGATTTAAACACCATGCTAAACACAGTGGGAGGACATCAAGCAGCCATGCAAATGTTAAAAGATACCATCAATGAGGAAGCTGCAGAATGGGATAGAACGCATCCAGTGCATGCAGGACCTGTTGCACCAGGCCAAATGAGAGAACCAAGGGGAAGTGACATAGCAGGAACTACTAGTACCCTTCAGGAACAAATAGGATGGATGACAAGTAATCCACCTATGCCAGTAGGAGAAATCTATAAAAGGTGGATAATCCTGGGATTAAATAAAATAGTAAGGATGTATAGTCCTACCAGCATTCTGGACATAAAACAAGGACCAAAAGAACCCTTTAGAGACTATGTAGACCGGTTCTATAAAACTCTAAGAGCCGAGCAAGCTTCACAGGATGTGAAGAATTGGATGACAGAAACCTTGTTAGTCCAAAATTCGAACCCAGACTGTAAGACTATTCTAAAAGCATTGGGACCAGGAGCTACACTAGAAGAAATGATGACAGCATGTCAGGGAGTGGGAGGACCTGGCCATAAAGCTAGAGTTTTGGCAGAAGCTATGAGCCAAATGAGCCAAATGACAAATCCAGCTACCATCATGATGCAGAAAGGCAATTTTAGGAACCAAAGAAAGCCTGTTAAGTGTTTCAATTGTGGCAAAGAGGGGCACATAGCCAGAAATTGCAAGGCTCCTAGGAAAAGGGGCTGTTGGAAATGTGGAAAAGAAGGCCACCAAATGAAAGATTGTACTGAGAGACAGGCTAATTTTTTAGGGAAAATCTGGCCTTCCCACAAGGGGAGGCCAGGGAATTTTCTTCAGAGCAGACCAGAGCCGACAGCCCCACCAGCAGAGAGCTTCAAGTTTGGGGAAGAGACAACAGCTCCCTCTCAGAAGCAGGAGCGGATAGACAAGGAGGAGATGTATCCCTTAGCTTCCCTCAGATCACTCTTTGGCAACGACCCATTGTCACAGTAAAAATAGGGGGACAAATAAAGGAAGCTCTATTAGATACAGGAGCAGATGATACAGTATTAGAAGAAATGAATTTGCCAGGAAAATGGAAACCAAAAATGATAGGGGGAATTGGAGGTTTTATTAAAGTAAGACAGTATGAACAGATACCCATAGAAATCAGTGGACATAAAGCTATAGGTACAGTATTAGTAGGACCTACACCTGTCAACATAATTGGAAGAAATCTGTTGACTCAAATTGGTTGCACTTTAAATTTTCCCATTAGTCCTATTGAAACTGTACCAGTAAAATTAAAGTCAGGAATGGATGGCCCAAAAGTTAAACAATGGCCATTGACAGAAGAAAAAATAAAAGCATTAATAGAAATATGTTCAGAAATGGAAAAGGAAGGGAAAATTTCAAAAATTGGGCCTGAAAATCCATACAATACTCCAGTATTTGCCATAAAGAAAAAAGATAGTACTAAATGGAGAAAATTAGTAGATTTCAGAGAACTTAATAAGAGAACTCAAGACTTCTGGGAAGTCCAGTTAGGAATACCACATCCCTCAGGGTTAAAAAAGAAAAAATCAGTAACAGTACTGGATGTGGGTGATGCATATTTTTCAGTTCCCTTAGATGAAGCATTCAGAAAGTACACTGCATTCACTATACCTAGTTTAAACAATGAGACACCAGGGATTAGATATCAGTATAATGTGCTTCCACAGGGATGGAAAGGATCACCAGCAATATTCCAAAGTAGCATGACAAAAATCTTAGAGCCTTTTAGAAAACAAAATCCAGACATAGTCATCTATCAATACATGGATGATTTGTATGTAGGATCTGACTTAGAAATAGAGCAGCATAGAACAAAAATAGAAAAACTGAGACAACATCTGTTGAGGTGGGGATTTACCACACCAGACAAAAAACATCAGAAAGAACCCCCATTCCTTTGGATGGGTTATGAACTCCATCCTGATAAATGGACAGTACAGCCTATAGAACTGCCAGACAAAGACAGCTGGACTGTCAATGACATACAGAAGTTAGTGGGAAAATTAAATTGGGCAAGTCAGATTTACCCAGGGATTAAAGTAAAGCAATTATGTAAACTCCTTAGGGGAGCCAAGGCGCTAACAGAAGTAATACAATTAACAAAAGAAGCAGAATTAGAACTGGCAGAAAACAGGGAAATTATAAAAGAACCAGTACATGGAGTGTATTATGATCCATCAAAAGAATTAATAGCAGAAATACAGAAGCAGGGGCAAGGCCAATGGACATATCAAATTTATCAAGAGCCATTTAAAAATCTAAAAACAGGAAAGTATGCAAGAATGAGGGGTGCCCACACTAATGATGTCAAACAATTAACAGAGGCAGTGCAGAAAATAACCACAGAAAGCATAGTAATATGGGGAAAGATTCCTAAATTTAGACTACCCATACAAAAAGAAACATGGGAAACATGGTGGACAGAATATTGGCAAGCCACCTGGATTCCTGAGTGGGAGTTTGTCAATACCCCTCCCTTAGTAAAATTATGGTACCAGTTAGAGAAAGAACCCATACCAGGAGCAGAAACTTACTATGTAGATGGGGCAGCTAACAGAGAGACTAGATTAGGAAAAGCAGGATATGTTACTAACAAAGGGAGGCAAAAAGTTGTCTCCCTAACTGACACAACAAATCAGAAGACTGAGTTACAAGCAATTTATCTAGCTTTACAGGATTCAGGATTAGAAGTAAACATAGTAACAGACTCACAATATGCATTGGGAATCATTCAAGCACAACCAGATAAAAGTGAATCAGAATTAGTCAGTCAAATAATAGAGCAGTTAATAAAAAAGGAAAAGGTCTACCTGGCATGGGTACCAGCGCATAAAGGAATAGGAGGAAATGAACAAGTAGACAAATTAGTCAGTGCTGGAATCAGGAAAGTACTATTTTTAGATGGAATAGATAAAGCCCAAGAAGAACATGAAAAATATCACAGTAATTGGAGAGCAATGGCTAGTGATTTTAACCTGCCACCGGTGGTAGCAAAAGAAATAGTAGCCTGCTGTGATAAATGTCAACTAAAAGGAGAAGCCATACATGGACAAGTAGACTGTAGTCCAGGAATATGGCAACTAGATTGCACACATTTAGAAGGAAAAGTTATCCTGGTAGCAGTCCATGTAGCCAGTGGGTATATAGAAGCAGAAGTTATCCCAGCAGAGACAGGGCAGGAAACAGCATACTTTCTCCTAAAACTAGCAGGAAGATGGCCAGTAAAAACAATACATACAGACAATGGTAGCAATTTCACCAGTGCTACAGTTAAGGCCGCCTGTTGGTGGGCGGGGATCAAGCAGGAATTTGGCATTCCCTACAATCCCCAAAGTCAAGGAGTAGTAGAATCTATGAATAAAGAATTAAAGAAAATTATAGGACAGGTAAGAGATCAGGCTGAACATCTTAAGACAGCAGTACAAATGGCAGTATTCATCCACAATTTTAAAAGAAAAGGGGGGATTGGGGGGTACAGTGCAGGGGAAAGAATAGTAGACATAATAGCAACAGACATACAAACTAAAGAACTACAAAAACATATTACAAAAATTCAAAATTTTCGGGTTTATTACAGGGACAGCAGAGATCCACTTTGGAAAGGACCAGCAAAGCTTCTCTGGAAAGGTGAAGGAGCAGTAGTAATACAAGATAATAGTGACATAAAAGTAGTGCCAAGAAGAAAAGCAAAGATTATTAGGGATTATGGAAAACAGATGGCAGGTGATGATTGTGTGGCAAGCAGACAGGATGAGGATTAGAACATGGATAAGTTTAGTAAAACACCATATATATATTTCAAAGAAAGCTAGGGGATGGGTGTATAGACATCACTATGAAAGCACTAATCCAAGAGTAAGCTCAGAAGTACAAATCCCACTAGGGGACGCGAGATTGACAATAACAACATATTGGGGACTACATACAGGAGAAAGAGACTGGCACTTGGGTCAAGGAGTCTCCATAGAATGGAGGAGAGGGAGATATAGCACACAAGTAGACCCTAACCTAGCAGACCAACTAATTCATATGCACTACTTTGATTGTTTTTCAGAATCTGCTATAAGAAAGGCCTTATTAGGACATAGAGTTAGTCCTAGGTGTGAATATCAAGCAGGACATAACAAGGTAGGATCTCTACAGTACTTGGCATTAGCAGCATTAATAAAGCCAAAAAAGATAAAGCCACCTTTGCCTAGTGTTACGAAACTGACAGAGGATAGATGGAACAAGCCCCAGAAGACCAAGGGCCACAGAGGGAGCCATACAATGAATGGACACTAGAGCTTTTAGAGGAGCTTAAGAGTGAAGCTGTTAGACATTTTCCTAGGCTATGGCTCCATAGCTTAGGGCAATATATCTATGAAACTTATGGAGATACCTGGGCAGGAGTGGAAGCCTTAGTAAGAATGCTGCAACAACTGCTGTTTATTCATTTCAGAATTGGGTGCCGTCATAGCAGAATAGGCATTGTTCCACAGAGAAGAGTAAGAAATGGAGCCAGTAGATCCTAGCTTAGATCCCTGGAATCATCCAGGAAGCCAGCCTACAACTCCTTGTACCAAATGTTATTGTAAACGATGTTGCTTTCATTGCCAATGGTGCTTTACAACGAAGGGCTTAGGCATCTCCTATGGCAGGAAGAAGCGGAGACAGCGACACAGAACTCCTCAAAGCAGTCAAGTGCATCAAAATTCTCTACCAAAGCAGTAAGTAGTGTTAAATAGTATATGTAATGTCATATTTGTTAGCAATAGGGATAGCAGCATTAATAGTAGCACTAATAATAGCCATAGTTGTGTGGACTATAGTATATATAGAATATAAGAAACTGGTAAGGCAAAGAAAAATAAATAAATTATATAAAAGAATAAGAGAAAGAGCAGAAGACAGTGGCAATGAGAGTGAGGGGGATGCAGAGGAATTGGCAGCACTTGGGGAAATGGGGCCTTTTATTCCTGGGGATATTAATAATCTGTAATGCTGCAGACAACTTGTGGGTCACAGTCTATTATGGGGTACCTGTGTGGAAAGAAGCAACCACTACTCTATTCTGTGCATCAGATGCTAAAGCATATGAAAGAGAGGCACATAACGTTTGGGCCACACATGCCTGTGTACCCACAGACCCCAACCCACAAGAAGTATTTCTGAAAAATGTAACAGAAAATTTTGATATGTGGAAAAATAACATGGTAGAACAAATGCATACAGATATAATCAGTTTATGGGATCAAAGCCTAAAGCCATGTGTAAAGTTAACCCCACTCTGTGTGACTTTAAACTGTACTAATGCCACCAATAACAGTCAGGAAAAGCCAGGGGCAATGCAAAACTGTTCTTTCAATATGACCACAGAAGTAAGAGATAAGAAGCTGAAATTATCTGCGCTTTTTTATAGGCTTGATATAGTACCAATAGGCAATAACAATAGCAGTGAATATAGGCTAATAAATTGTAATACCTCAACCATTACACAGGCTTGTCCAAAGGTATCTTGGGATCCAATCCCTATACATTATTGTGCTCCAGCTGGTTATGCAATTCTAAAATGTAATGATAAAAGATTCAATGGGACAGGGCCATGCAAGAATGTCAGCACAGTACAATGTACACATGGAATTAAACCAGTGGTATCAACTCAATTGTTGTTAAATGGCAGCCTAGCAGAAGAAGGTATAGTAATCAGATCTCAAAATATCTCAAATAATGCAAAAACCATAATAGTACACCTTAATGAATCTGTACAGATTAATTGTACAAGACCCAACAACAATACAAGGAAAGGTATACATTTAGGACCAGGACAAACATTCTATGCAACAGGAGCAATAATAGGAGACATAAGAAAGGCACATTGTAACATTAGTGGAACACAATGGAATAACACTCTGGAGTATGTAAAGGCAGAATTAAAGTCGCATTTCCCTAATAATACAGCAATAAAATTTAACCAATCCTCAGGAGGGGACCTAGAAATTACAATGCATAGTTTTAATTGTAGAGGAGAATTTTTCTACTGCGATACATCAGGACTGTTTAATGACACAGGCTCCAATAATGGCACTATCACTCTCCCATGTCGGATAAAACAAATTGTAAACATGTGGCAGGGAGTAGGACGAGCAATGTATACCTCTCCCATTGCAGGAAACATTACCTGTAACTCAAATATTACAGGTTTACTATTGACAAGAGATGGTGGTAATGAGAGTAACATTGAGACCTTCAGACCTGAGGGAGGAAATATGAAAGACAATTGGAGAAGTGAACTATATAAGTATAAAGTAGTAGAAATTGAACCATTAGGAGTAGCACCCACCAAGGCAAAAAGACAAGTGGTGCAGAGAGAAAAAAGAGCAGCGGGACTAGGAGCTTTGTTCCTTGGGTTTCTTGGGGACAGCAGGGAGCATATGGGCGCGGCGTCGATAACGCTGACGGTACAGGCCAGACAATTATTGTCTGGAATAGTGCAACAGCAAAACAATTTGCTGAGGGCTATTGAAGCGCAACAGCATCTGTTGCAGCTCACAGTCTGGGGCATTAAACAGCTCCAGGCAAGAGTCCTGGCTGTGGAAAGATACCTAAAGGATCAACAGCTCCTAGGGATCTGGGGCTGCTCTGGAAAACTCATCTGCACCACTAATGTGCCCTGGAACTCTAGTTGGAGTAATAAATCTCAGGAAGAGATTTGGAATAACATGACCTGGATGGAGTGGGAAAAGGAGATTAGCAATTACTCAAACATAATATACAAATTGATTGAAGAGTCACAAAACCAGCAGGAAAAGAATGAACAAGAATTATTGGCATTAGACAAATGGGCAAGTCTGTGGAATTGGTTTGACATATCAAACTGGCTGTGGTATATAAAAATATTCATAATGATAGTGGGAGGCTTGATAGGCTTAAGAATAGTTTTTGCTGTACTTTCTATAGTAAATAGAGTTAGGAAGGGATACTCACCTTTGTCATTACAGACCCTTATCCCAAGCCCGAGGGGACCCGACAGGCCCGAAGGAATCGAAGAAGGAGGTGGAGAGCAAGGCAAAGACAGATCCGTGCGCTTAGTGACCGGATTCTTAGCTCTTGCCTGGGACGATCTGAGGAACCTGTGCCTCTTCAGCTACCGCCACTTGAGAGACTTCATATTAATTGCAGCGAGGATTGTGGACAGGGGCCTGAGGAGGGGGTGGGAAGCTCTCAAATATCTGGGGAATCTCACGCGGTATTGGAGTCAGGAACTAAAGAATAGTGCTATCAGCCTGTTTAATACCACAGCAATAGTAGTAGCTGAAGGGACAGATAGAATTATAGAAGTTTTGCAAAGAGCTGGTAGAGCTGTTCTCAACATACCTAGAAGAATAAGACAGGGCGCAGAAAGGGCTTTGCTGTAAAATGGGGGGCAAGTGGTCAAAAAGCAGTATAGTTGGATGGCCTGCTGTAGGGGAAAGAATGAGACAAACCCCTACAGCAGCAGAAGGGGTGGGAGCAGTGTCTCGAGACTTAGACAGACGGGGAGCAATTACAAGCAGCAATACTAGAACTACTAATCCTGACTTGGCCTGGCTGGAAGCACAAGAGGAGGAGGAAGTAGGCTTTCCAGTCAGACCTCAGGTACCTGTAAGACCAATGACCTATAAGGCAGCTGTAGATCTCAGTCACTTTTTAAAAGAAAAGGGGGGACTGGAAGGGTTAATTTACTCCAAGAAAAGAGGAGATACCCTTGATCTGTGGGTTTACCACACACAAGGCTACTTCCCTGATTGGCAGAACTACACACCAGGGCCAGGGATCAGATATCCACTGACCTTGGGATGGTGCTTCAAGCTAGTACCAGTTGATCCAGAAGAGGTGGAAAAGGCCAATGAAGGAGAGAACAACTGCTTGTTACACCCCATGAGCCAACATGGAATGGAGGATGAAGACAGAGAAGTACTGAGGTGGAAGTTTGACAGCAGCCTGGCACTGAGACACATAGCCAGAGAGAGACATCCGGAGTTCTACCAAGACTGAGACTGCTGACACAGAGATTGCTGACACAGAAGAATCTAAAAGGGACTTTCCACTGGGGACTTTCCAGAGGGCGGTCCAGAGGGCGGGACTGGGGAGTGGCTCACCCTCAGATGCTGCATATAAGCAGCCGCTTTTCGCCTGTACTGGGTCTCTCTAGTTAGACCAGATTTGAGCCTGGGGGCTCTCTGGCTAGCTGGGGAACCCACTGCTTA
>B.AU.x.C76.AF538306_F1.BR.93.93BR020_1.AF005494
TGGAAGGGCTAATTTACTCCCAGAAAAGACAAGATATCCTTGATCTGTGGGTCTATCACACACAAGGCTACTTCCCTGATTGGCAGAACTACACACCAGGGCCAGGGATCAGATATCCACTGACCTTTGGATGGTGCTTCAAGCTAGTACCAGTTGATCCAGATAAGATAGAAGAGGCCAGTAAAGAAGAGAACAGCGTCTTGTTACACCCTATAAGCCTGCATGGAATGGAGGACCCGGAGAAAGAAGTGTTAGTGTGGAGGTTTGACAGCCGCCTAGCATTTCATCACATGGCCAAAGAGCTGCATCCGGAGTACTACAAGAACTGCTGACATCGAGCTTTCTACAAGGGACTTTCCGCTGGGGACTTTCCAGGGAGGCGTGGCCTGGGCGGGACAGGGGAGTGGCGAGCCCTCAGATGCTGCATATAAGCCGCTGCTTTTGCCTGTACTGGGTCTCTCTGGTTAGACCAGATCTGAGCCTGGGAGCTCTCTGGCTGACTAGGGAACCCACTGCTTAAGCCTCAATAAAGCTTGCCTTGAGTGCTTCAAGTAGTGTGTGCCCGTCTGTTGTGTGACTCTGGTAGCTAGAGATCCCTCAGACCCTTTTAGTCAGTGTGGAAAATCTCTAGCAGTGGCGCCCGAACAGGGTCTTGAAAGCGAAAGAGAAACCAGAGGAGCTCTCTCGACGCAGGACTCTGCTTGCTGAAGCGCGCACAGCAAGAGGCGAGGGGCGGCGACTGGTGAGTACACCAAAAATTTTGACTAGCGGAGGCTAGAAGGAGAGAGATGGGTGCGAGAGCGTCGCTCTTAAGCGGGGGAGAATTAGACAAATGGGAAAAAATTCGGTTAAGGCCAGGGGGAAAGAAAAGATATAAATTAAAACATATAGTATGGGCAAGCAGGGAGTTAGAACGATTCGCAGTCAATCCTGGCCTGTTAGAGACATCAGAAGGCTGCAGACAAATACTGGGACAGCTACAACCATCCCTTCAGACAGGATCAGAAGAACTTAAATCATTATATAATACAGTAGCAGTCCTCTATTGTGTACATCAAAGGATAGAGGTAAAAGACACCAAGGAAGCTTTAGATAAGATAGAGGAAGAGCAAAACAAAAGTAAGAAAAAGGCACAGCAAGCAGCAGCTGACACAAGACACAGCAGCAGCAGCCAGGTCAGCCAAAATTACCCTATAGTACAGAACCTCCAGGGGCAAATGGTACATCAGGCCATATCACCTAGGACTTTAAATGCTTGGGTTAAAGTAGTAGAGGAGAAGGCTTTTAGCCCAGAAGTAATACCCATGTTTTCAGCATTATCAGAAGGAGCCACCCCGCAAGATTTAAATACCATGCTAAACACAGTGGGGGGACATCAAGCAGCCATGCAAATGTTAAAAGAGACTATCAATGATGAAGCTGCAGAATGGGATAGATTGCACCCAATACATGCAGGGCCTATTGCACCAGGCCAGATGAGAGAACCAAGGGGAAGTGACATAGCAGGAACTACTAGTACCCTTCAGGAACAAATAGGATGGATGACAAATAATCCACCTATCCCAGTAGGAGAAATTTATAAAAGATGGATAATCTTGGGATTAAATAAAATAGTCAGGATGTACAGCCCTACCAGCATTCTGGACATAAGACAAGGACCAAAAGAACCCTTTAGAGACTATGTAGACCGGTTCTATAAAACTCTAAGAGCCGAGCAAGCTTCACAGGAGGTAAAAAATTGGATGACAGAAACCTTGTTGGTCCAAAATGCAAACCCAGATTGTAAGACTATTTTAAAAGCATTGGGACCAGCAGCTACACTAGAAGAAATGATGACAGCATGTCAGGGAGTGGGGGGACCCGGCCATAAAGCAAGAGTCTTGGCTGAAGCAATGAGCCAAGTACAAAATTCAGCTAACGTAATGATGCAGAAAGGCAATTTTAGGAACCAAAGAAAAACTGTTAAATGTTTCAATTGTGGCAAAGACGGTCACATAGCCAGAAATTGCAGGGCCCCTAGGAAAAAGGGCTGTTGGAAATGTGGAAAGGAAGGACACCAAATGAAAGATTGTACTGAGAGACAGGCTAATTTTTTAGGGAAGATCTGGCCTTCCCACAAGGGAAGGCCAGGGAATTTTCTTCAGAGCAGGCCAGAGCCAACAGCCCCACCAGAAGAGAGCTTCAGGTTTGGGGAAGAGACAACAACTCCCTCTCAGAAGCAGGAGCCGATAGACAAGGAACTGTATCCCTTGACTTCCCTCAAATCACTCTTTGGCAGCGACCCCTCGTCACAATAAAGATAGAGGGGCAGCTAAAGGAAGCTCTATTAGATACAGGAGCAGATGATACAGTATTAGAAGAAATGAATTTGCCAGGAAGATGGAAACCAAAAATGATAGGGGGAATTGGAGGTTTTATCAAAGTAAGACAGTATGATCAGATACTAATAGAAATCTGTGGACATAAAGCTATAGGTACAGTATTAGTAGGACCTACACCTGTCAACATAATTGGAAGAAATCTGTTGACTCAGATTGGTTGCACCTTAAATTTTCCCATTAGTCCTATTGAAACTGTACCAGTAAAATTAAAGCCAGGAATGGATGGCCCAAAAGTTAAACAATGGCCATTAACAGAAGAAAAAATAAAAGCCTTAATAGAAATTTGTACAGAAATGGAAAAGGAAGGGAAAATTTCAAAAATTGGGCCTGAAAATCCATACAATACTCCAGTATTTGCCATAAAGAAAAAAGACAGTACTAAATGGAGAAAATTAGTAGATTTTAGAGAACTTAATAAGAAAACTCAAGACTTCTGGGAAGTTCAATTAGGAATACCACATCCCGCAGGGTTAAAAAAGAAAAAATCAGTAACAGTACTGGATGTGGGTGATGCATATTTTTCAGTTCCACTAGATAAAGATTTCAGGAAGTATACTGCATTTACCATACCTAGTATAAACAATGAGACACCAGGAATTAGATATCAGTACAATGTGCTTCCACAGGGATGGAAAGGATCACCAGCAATATTCCAAAGTAGCATGACAAAAATCTTAGAGCCTTTTAGAAAACAAAATCCAGACATAGTTATCTATCAATACGTGGATGACTTGTATGTAGGATCTGACTTAGAAATAGGGCAACATAGAACAAAAATAGAGGAACTGAGACAACATCTGTTGAGGTGGGGGTTTACCACACCAGACAAAAAACATCAGAAAGAACCTCCATTCCTTTGGATGGGTTATGAACTCCATCCTGATAAATGGACAGTACAGCCTATAGTGCTACCAGAAAAAGACAGCTGGACTGTCAATGACATACAGAAGTTAGTGGGAAAATTGAATTGGGCAAGTCAGATTTACCCAGGGATTAGAGTAACGCAATTATGTAAACTCCTTAGGGGAACCAAAGCACTGACAGAAGTAGTACCACTAACAGAAGAAGCAGAGCTAGAACTGGCAGAAAACAGGGAGATTCTAAAAGAGCCAGTACATGGGGTGTATTATGACCCATCAAAAGACTTAATAGCAGAAATACAGAAGCAGGGGAAAGGCCAATGGACATACCAAATTTATCAAGAGCCATTTAAAAATCTGAAAACAGGAAAGTATGCAAAAATGAGGTCTGCCCACACTAATGATGTAAAACAGTTAACAGAAGCAGTGCAAAAGATATCTCTAGAAAGCATAGTAATATGGGGCAAGACTCCTAAGTTTAGACTACCCATATTAAAAGAGACATGGGATACATGGTGGACAGAGTACTGGCAAGCCACCTGGATTCCTGAGTGGGAGTTTGTCAATACCCCCCCTCTAGTAAAACTATGGTATCAGTTAGAAACAGAGCCCATAGTAGGAGCAGAAACCTTCTATGTAGATGGGGCATCTAATAGAGAGACCAAAAAAGGAAAAGCAGGATATGTTACTGACAGAGGAAGACAAAAAGCGGTCTCCCTAACTGAGACTACAAATCAGAAGGCTGAGTTACAAGCAATTCAGTTAGCTTTACAGGATTCAGGATCAGAAGTAAACATAGTAACAGACTCACAGTATGCATTAGGAATCATTCAAGCACAACCAGATAAGAGTGAATCAGAGTTAGTCAATCAAATAATAGAGCAATTAATAAAAAAGGAAAAGGTCTACCTGTCATGGGTACCAGCACACAAAGGGATTGGAGGAAATGAACAAGTAGATAAATTAGTCAGTGCTGGAATCAGGAAAGTACTGTTTCTAGATGGGATAGATAAGGCACAAGAGGAACATGAAAAATATCACAACAATTGGAGAGCAATGGCTAGTGATTTTAATATACCAGCTGTAGTAGCAAAAGAAATAGTAGCTAGCTGTGATAAATGTCAGCTAAAAGGGGAAGCCATGCATGGACAAGTAGATTGTAGCCCAGGGATATGGCAATTAGATTGCACACATTTAGAAGGAAAAATTATCCTGGTAGCAGTCCATGTAGCTAGTGGGTACCTAGAAGCAGAAGTTATCCCAGCAGAAACAGGACAAGAGACAGCCTACTTCCTACTAAAGTTAGCAGGAAGATGGCCAGTAAAAACAATACATACAGACAATGGCACCAATTTCACCAGTGCCACGGTTAAGGCAGCTTGTTGGTGGGCAGGTATCCAGCAGGAATTTGGAATTCCTTACAACCCCCAAAGTCAAGGAGTAGTAGAATCTATGAATAAAGAGCTAAAGAAAATCATAGGACAGATAAGAGATCAAGCTGAACATCTTAAGACAGCAGTCCAAATGGCAGTATTCATTCACAATTTTAAAAGAAAAGGGGGGATTGGGGGATACAGTGCAGGGGAAAGAACAATAGACATAATAGCAACAGACATACAAACTAGAGAATTACAAAAACAAATTATAAAAATTCAAAATTTCCGGGTTTATTACAGGGACAGCAGAGACCCAGTTTGGAAAGGACCAGCAAAGCTACTCTGGAAAGGTGAAGGGGCAGTAGTCATACAAGACAATAGTGAAATAAAGGTAGTTCCAAGAAGAAAAGCAAAGATCATTAGGGATTATGGAAAACAGATGGCAGGTGATGATTGTGTGGCAGGTAGACAGGATGAGGATTAACACATGGAAAAGTTTAGTAAAATACCATATGCATATTTCAAAGAAAGCCAAAGGATGGTTTTATAGACATCACTTTGAAAGCAGGCATCCAAAAATAAGTTCAGAAGTACACATCCCACTAGAGACAGCTGAATTAGTAATAACAACATACTGGGGGCTGCTTCCAGGAGAAAGAGAATGGCATCTGGGTCAGGGAGTCTCCATAGAATGGAGGCAGGGGAGGTATAGAACACAAATAGACCCTGGCCTGGCAGACCAACTGATCCATATATATTATTTTGATTGTTTTTCAGAATCTGCCATAAGGAAAGCCATATTAGGACATAAAATTAGCCCTAGGTGTAACTATCAAGCAGGACATAACAAGGTAGGATCTCTACAATACTTGGCACTAACAGCATTAATAGCTCCAAAAAAGACAAAGCCGCCTTTGCCTAGTGTCCAGAAACTAGTAGAAGACAGATGGAACAAGCCCCAGAAGACCAGGGGCCACAGAGAGAGCCATACAATGAATGGACACTAGATCTTTTAGAGGAGCTTAAGAATGAAGCTGTTAGACATTTTCCTAGGCCATGGCTCCATAGCTTAGGACAACATATCTATAACACCTATGGGGATACTTGGGAAGGAGTTGAAGCAATCATAAGGATATTGCAACAACTACTGTTTATCCATTTCAGAATTGGGTGCCGTCATAGCAGAATAGGCATTACTCGACAGAGAAGAGTAAGAAATGGAACTAGTAGATCCTAACTTAGATCCCTGGAACCATCCAGGAAGCCAGCCTACAACTCCTTGTACCAGATGTTATTGTAAATGGTGTTGCTTTCATTGTTACTGGTGCTTTACAACGAAGGGCTTAGGCATCTCCTATGGCAGGAAGAAGCGGAGACAGCGACCAAGAACTCCTCAAAGCAGTCAGATACATCAAGATTTTGTACCAAAGCAGTAAGTATTGTTAAGCATATGTAATGTCAAATTTGTTAGCAATAGGCATAGCAGCATTAATAGTAGCACTAATAATAACAATAGTTGTGTGGACTATAGCATATATAGAATATAAGAAACTGGTAAGGCAAAGAAAAATAAATAGGTTATATAAAAGAATAAGCGAAAGAGCAGAAGACAGTGGCAATGAGAGTGAGGGGGATGCAGAGGAATTGGCAGCACTTGGGGAAGTGGGGCCTTTTATTCCTGGGGACATTAATAATCTGTAATGCTGCAGAAAACTTATGGGTTACAGTCTATTATGGGGTACCTGTGTGGAAAGAAGCAACCACTACTCTATTCTGTGCATCAGATGCTAAATCATATGAAAAAGAGGCACATAATGTCTGGGCTACACATGCTTGTGTACCCACAGATCCCAATCCACAAGAAGTAGTTCTGGAAAATGTAACAGAAAGGTTTAATATGTGGGAAAATAACATGGTAGAACAAATGCATACAGATATAATCAGTTTATGGGATCAAAGCCTAAAGCCATGTGTGAAGTTAACCCCACTCTGTGTTACTTTAGATTGTAGAAACATTGCCACCAATGGCACCAATGACACTATTGCCATCAATGACACTCTGAAGGAAGATCCAGAGGCAATACAAAACTGTTCTTTCAATACAACCACAGAAATAAGAGATAAGCAGCTGAAAGTACATGCACTTTTTTATAAACTTGATATAGTACAAATCAACAAGGATGACAATAGAACATACAGACTAATAAATTGTGATGCCTCAACCATTACACAGGCTTGTCCAAAGGTATCTTGGGATCCAATTCCCATACATTATTGTGCTCCAGCTGGTTATGCGATTCTAAAGTGTAATGAGAAAAATTTCACAGGGACAGGGTCATGCAAGAATGTCAGTACAGTACAATGTACACATGGAATTAAACCAGTGGTATCCACTCAATTGTTGTTAAATGGCAGCCTAGCAGAAGGAGAGATAGTAATCAGATCTCAAAATATCTCAGATAATGCAAAAACCATAATAGTGCACCTTAATGAATCTGTACAGATTAATTGTACAAGACCCAACAACAATACAAGAAAAAGAATATCTTTAGGACCAGGACGAGTATTTTATACAACAGGAGAAATAATAGGAGACATCAGAAAGGCACATTGTAACGTTAGTGGAACACAATGGAGGAACACGTTAGCAAAGGTAAAGGCAAAGTTAGGGTCTTATTTCCCTAATGCAACAATAAAATTTAACTCATCCTCAGGAGGGGACCTAGAAATTACAAGGCATAATTTTAATTGTATGGGAGAATTTTTCTACTGTAATACAGATGAACTGTTTAATGACACAAAATTCAATGACACAGGATTCAATGGCACTATCACTCTCCCATGTCGAATAAAACAAATTGTAAACATGTGGCAGGAAGTGGGACGAGCAATGTATGCCAATCCCATTGCAGGAAACATTACCTGTAACTCAAATATTACAGGTCTGCTATTGACAAGAGATGGTGGTCTGAATAGTACTAATGAGACCTTCAGACCTGGGGGAGGAAATATGAAAGACAATTGGAGAAGTGAATTATATAAATATAAAGTAGTAGAAATTGAACCACTAGGAGTAGCACCCACCAAGGCAAAAAGACAAGTGGTGAAGAGAGAAAGAAGAGCAGTGGGACTAGGAGCTCTGTTCCTTGGGTTCTTGGGAGCAGCTGGAAGCACTATGGGCGCGGCGTCAATAACGCTGACGGTACAGGCCAGACAATTATTGTCTGGAATAGTGCAACAGCAGAGCAATCTGCTGAGGGCTATTGAAGCGCAACAGCATCTGTTGCAGCTCACAGTCTGGGGCATTAAACAGCTCCAGGCAAGAGTCCTGGCTGTGGAAAGATACCTAAAGGATCAACAGCTCCTAGGGCTTTGGGGCTGCTCTGGAAAACTCATCTGCACCACTAATGTGCCCTGGAACTCTAGTTGGAGTAATAAATCTCTTGAGGAGATTTGGGGGAACATGACCTGGATGGAGTGGGAAAAAGAGGTTAGCAATTACTCAAAAGAAATATACAGGTTAATTGAAGACTCGCAGAACCAGCAGGAAAAGAATGAACAAGAATTATTAGCATTGGACAAATGGGCAAGTCTGTGGAATTGGTTTGACATAACACAGTGGCTGTGGTATATAAAAATATTCATAATGATAGTAGGAGGCTTGATAGGCTTAAGAATAGTTTTTACTGTGCTTTCTATAGTAAATAGAGTTAGGAAGGGATACTCACCTTTGTCATTTCAGACCCATATCCCAAGCCCGAGGGAACCCGACAGGCCCGAAGGAATCGAAGAAGGAGGTGGAGAGCAAGGCAAAGACAGATCCGTGAGATTAGTGACCGGATTCTTAGCTCTTGCCTGGGACGACCTGCGGAACCTGTGCCTCTTCAGCTACCGCCACTTGAGAGACTTCATATTAATTGCAGCGAGGATTGTGGACAGGGGGCTGAAGAGGGGGTGGGAAGCTCTCAAATATCTGGGGAATCTCACACAGTATTGGGGTCAGGAACTAAAGAATAGTGCTATTAGCTTGCTTAATGCCACAGCAATAGCAGTAGCTGAGTGGACAGATAGAGTTATAGAAGCTTTGCAAAGAGCTGGTAGAGCTATTCTCAACATACCTAGAAGAATAAGACAGGGCTTGGAAAGGGCTTTGCTATAAAATGGGTGGCAAGTGGTCAAAAAGTAGTATAGTTGGATGGCCTGCTATAAGGGAAAGAATGAGGCGAACCCCTCCAACCCCTCCAGCAGCAGAGGGGGTGGGAGCAGTGTCTCAAGACTTAGAAAGACGGGGGGCAATTACAAGCAGCAATACTAGAGCTAATAATCCTGACTTGGCCTGGCTGGAAGCACAAGAGGAAGACGAAGTAGGCTTTCCAGTCAGACCTCAGGTACCTTTAAGACCAATGACCTATAAGGGAGCTGTAGATCTCAGTCACTTTTTAAAAGAAAAGGGGGGACTGGAAGGGTTAATTTACTCCAAGAGAAGACAAGAGATCCTTGATCTGTGGGTCTACCACACACAAGGCTACTTCCCTGATTGGCAGAACTACACACCAGGGCCAGGGATCAGATATCCACTGACCATGGGGTGGTGCTTCAAGCTAGTACCAGTTGACCCAGAGGAGGTAGAAAAGGCCAATGAAGGAGAGAACAACTGCTTGCTACACCCCATGAGCCAACATGGAATGGAGGATGAAGACAAAGAAGTACTGAAATGGGAGTTTGACAGCCGCTTGGCACTGAGACACATAGCCAGAGAGAGACATCCGGAGTACTACCAAGACTGAGACTGCTGACACAGAGATTGCTGACACAGAAGAATCTAAAGGGACTTTCCACTGGGGACTTTCCAGAGGGTGGGCCAGAGGGCGGGACTGGGGAGTGGCTCACCCTCAGATGCTGCATATAAGCAGCCGCTTTTCGCCTGTACTGGGTCTCTCTAGTTAGACCAGATTTGAGCCCGGGAGCTCTCTGGCTAGCTAGGGAACCCACTGCTTAAGCCTCAATAAAGCTTGCCTTGAGTGCTTT
>B.US.90.US4.AY173955_F2.CM.95.MP257.AJ249237
GGACCCGAAAGCGAAAGTAGAACCAGAGAAGTTCTCTCGACGCAGGACTCGGCTTGCTGAAGTGCGCACGGCAAGAGGCGAGGGGCGGCGACCGGTGAGTACGCCAAAATTTTTGACTAGCGGAGGCTAGAAGGAGAGAGATGGGTGCGAGAGCGTCAGTATTAAGCGGGGGAGAATTAGATAAATGGGAAAAAATTCGGTTAAGGCCAGGGGGAAAGAAAAGATATAGACTAAAACATATAGTATGGGCAAGCAGGGAGCTAGAACGATTTGCAGTTAATCCTGGCCTTTTAGAGACAGCAGACGGCTGTAAACAAATAATAGCACAGCTACAACCATCCCTTCAGACAGGATCAGAAGAACTTAGATCATTATTTAACACAGTAGTAACCCTCTATTGTGTACATAAAAAGATAGAGGTAAAAGACACCAAGGAAGCCTTAGAGAAGGTAGAGGAAGAGCAAAACAAAAGTAAGAAAAAGGCACAGCAAGCAGCAGCTGACACAGGAAGCAACAGCCCGGTCAGCCAAAATTTCCCTATAGTGCAGAACCTTCAGGGGCAAATGGTACATCAAGCCCTATCACCTAGAACTTTAAATGCATGGGTAAAAGTAGTAGAAGAGAAGGCTTTCAGCCCAGAAGTAATACCCATGTTTTCAGCATTATCAGAAGGAGCCACCCCACAAGATTTAAACACCATGCTAAACACAGTGGGGGGACATCAAGCAGCCATGCAAATGTTAAAAGAGACTATCAATGAGGAAGCTGCAGAATGGGATAGAGTGCATCCAGTGCARGCAGGGCCTGTTGCACCAGGCCAGATAAGAGAACCAAGGGGAAGTGACATAGCAGGAACTACTAGTAACCTTCAGGAACAAATAGCATGGATGACACATAATCCACCTATCCCAGTAGGAGAAATCTATAAAAGATGGATAATTCTAGGATTAAATAAAATAGTAAGAATGTATAGCCCTGTCAGCATTCTGGACATAAGACAGGGACCAAAAGAACCTTTTAGAGATTATGTAGACCGGTTCTATAAAACTCTAAGAGCCGAGCAAGCTTCACAGGATGTAAAAAATTGGATGACAGAAACCTTGTTGGTCCAAAATGCGAACCCAGACTGTAARACTATTTTAAAAGCATTGGGACCAGCAGCTACATTAGAAGAAATGATGACAGCATGTCAGGGAGTGGGGGGACCCGGCCATAAAGCAAGAGTTTTGGCTGAAGCAATGAGCCAAGTAACAACCCCACCTGCCATAATGATGCAGAAAGGCAATTATAGGAACCAAAGGAAAAGTGTTAAGTGTTTCAATTGTGGCAAAGAAGGGCACATAGCCAAAAATTGCAGGGCCCCTAGGAAAAAGGGCTGTTGGAAATGTGGAAAGGAAGGACACCAAATGAAAGATTGTACTGAAAGACAGGCTAATTTTTTAGGGAAGATCTGGCCTTCCTACAAGGGAAGGCCAGGGAATTTTCTTCAGAGCAGACCAGAGCCAACAGCCCCACCAGAAGAGAGCTTCAGGTTTGGGGAAGAGACGACTCCCCCTCAGAAGCAGGAGCGGACAGACAAGGAACTGTATCCTTTAGCTTCCCTCAGATCACTCTTTGGCAACGACCCCTCGTCACAGTAAAGATAGGGGGGCARTTAAAGGAAGCTCTATTAGATACAGGAGCAGATGATACAGTATTAGAAGAAATGAGTTTGCCAGGAAAATGGAAACCAAAAATGATAGGGGGAATTGGAGGTTTTATCAAAGTAAAACAGTATGAGCAAATACTTGTAGAAATCTGTGGACATAAAGCTATAGGTACAGTGTTAGTAGGACCTACACCTGTCAACATAATTGGAAGAAATCTGTTGACTCAGATTGGGTGCACTTTAAATTTTCCCATTAGTCCTATTGAAACTGTACCAGTAAAATTAAAGCCAGGAATGGATGGCCCAAAAGTTAAGCAATGGCCATTGACAGAGGAAAAAATAAAAGCATTAGTAGAAATTTGTACAGAAATGGAAAAGGAAGGAAARATTTCAAAAATTGGGCCTGAAAATCCATACAATACKCCAGTATTTGCCATAAAGAAAAAAGACAGTACTAAATGGAGAAAATTAGTAGATTTTAGAGAGCTTAATAAGAGAACTCAGGACTTCTGGGAAGTCCAATTAGGAATACCACATCCCGCAGGGTTAAAAAAGAAAAAATCAGTAACAGTACTGGATGTGGGTGATGCATATTTTTCAGTTCCCTTAGATAAAGAATTCAGAAAGTATACTGCATTTACCATACCTAGTATAAAYAATGAGACACCAGGGATTAGATATCAGTACAATGTACTTCCACAAGGATGGAAAGGATCACCAGCAATATTCCAAAGTAGCATGACAAAAATCTTAGAGCCTTTTAGAAAACAAAATCCAGACATAGTTATCTATCAGTACATGGATGATTTGTATGTAGGATCTGACCTAGAAATAGAGCAGCATAGAACAAAAATAGAGGAACTGAGAGGACATCTGTTAAGGTGGGGATTTACCACACCAGACAAAAAACATCAGAAAGAACCTCCATTTCTTTGGATGGGTTATGAACTCCATCCTGATAAATGGACAGTACAGCCCATAAAGCTGCCAGAAAAAGACAGCTGGACTGTCAATGATATACAGAAATTAGTGGGAAAATTGAATTGGGCAAGTCAGATTTATGCAGGGATTAAAGTAAGGCAATTATGTAAACTCCTTAGGGGAGCCAAAGCACTAACAGAAGTAGTACCACTAACAGAAGAAGCAGAATTAGAACTGGCAGAAAACAGGGAGATTCTAAAAGAGCCAGTGCATGGAGTGTATTATGACCCATCAAAAGAATTAATAGCAGAAATACAGAAGCAGGAGCAAGGCCAATGGACATATCAAATTTATCAAGAGCCATTTAAAAATCTGAAAACAGGAAAGTATGCAAGAATGAGGGGTGCCCACACCAATGATGTAAAACAATTAACAGAGGCAGTACAAAAAATAGCCAGAGAATGCATAGTAATATGGGGAAAAATACCTAAATTTAAATTACCCATACAGAAAGAAACATGGGAAACATGGTGGATAGAGCATTGGCAAGCCACCTGGATTCCTGAGTGGGAGTTTGTCAATACCCCTCCCTTAGTGAAATTATGGTACCAGTTAGAAAAAGAACCCATAGTAGGAGCAGAAACTTTCTATGTAGATGGGGCAGCTAATAGAGAGACTAAATTAGGGAAAGCAGGATATGTTACTGACAGAGGAAGACAAAAGGTTGTCTCCCTAACTGACACAACAAATCAGAAGACTGAGCTACAAGCAATTCATCTAGCTTTGCAGGATTCAGGATTAGAAGTAAACATAGTAACAGACTCACAATATGCATTAGGAATTATTCAAGCACAACCAGATAAAAGTGAATCAGAAATAGTCAGTCAAATAATAGAGCAATTAATCAAAAAGGAAAAGGTCTACCTGGCATGGGTACCAGCACACAAAGGGATTGGAGGAAATGAACAAGTAGATAAATTAGTTAGTTCTGGAATCAGGAAAGTACTATTTTTGGATGGAATAGATAAGGCTCAAGAAGAACATGAAAAATATCACAGTAATTGGAGAGCAATGGCTAGTGATTTTAACCTGCCACCTGTAGTAGCAAAAGAAATAGTAGCCAGCTGTGATAAATGTCAGCTAAAAGGAGAAGCCATGCATGGACAAGTAGATTGTAGTCCAGGAATATGGCAACTAGATTGTACACATCTAGAAGGAAAGATTATCCTGGTAGCAGTTCATGTAGCCAGTGGCTATATAGAAGCAGAAGTTATTCCAGCAGAGACAGGGCAGGAAACAGCATACTTTATCTTAAAATTAGCAGGAAGATGGCCAGTAAAAACAATACATACAGACAATGGCAGCAATTTCATCAGTAACACAGTTAAGGCCGCCTGCTGGTGGGCAGGAATCAAGCAGGAATTTGGCATTCCCTACAATCCCCAAAGTCAAGGAGTAGTAGAATCTATGAATAAAGAATTAAAGAAAATTATAGGACAGGTAAGGGATCAGGCTGAACATCTTAAGACAGCAGTACAAATGGCAGTATTCATTCACAATTTTAAAAGAAAAGGGGGGATTGGGGGATATAGTGCAGGGGAAAGAATAGTAGACATAATAGCAACAGACATACAAACTAAAGAATTACAAAAACAAATTACAAAAATTCAAAATTTTCGGGTTTATTACAGGGACAGCAGAGATCCACTTTGGAAAGGACCAGCAAAGCTTCTCTGGAAAGGTGAAGGGGCAGTAGTAATACAAGATAATAGTGACATAAAAGTAGTGCCAAGAAGAAAAGTAAAAATCATTAGGGATTATGGAAAACAGATGGCAGGTGATGATTGTGTGGCAAGTAGACAGGATGAGGATTAGAGCATGGAACAGTCTAGTAAAACACCATATGTATATATCAAGGAAAGCTAAGGATTGGTGTTATAAACATCATTATGAAAGCACTAATCCAAGAATAAGTTCAGAAGTACACATCCCACTAAAGGATGCCAAATTGGTAATAACAACATATTGGGGTCTGCATACAGGAGAAAAAGACTGGCATTTGGGTCAGGGAGTCTCCATAGAATGGAGGAAAAAGAGATATAGCACACAAGTAGACCCTGACCTAGCAGACCAACTAATTCATCTGTATTATTTTGATTGTTTTTCAGAATCTGCTATAAGACAAGCCATATTAGGACATAGAGTTAGTCCTAGGTGTGAATATCAAGCAGGACATAATAAGGTAGGATCTCTACAGTACTTGGCATTAGCAGCATTAATAAAACCAAAAAAGATAAAGCCACCTTTGCCTAGTGTTAGGAAATTGACAGAGGATAGATGGAACAAGCCCCAGAAGACCAAGGGCCACAGAGGGAACCATACAATGAATGGACACTAGAGCTTTTAGAGGAACTTAAGAGTGAAGCTGTTAGACATTTTCCTAGGATATGGCTCCATAGCTTAGGACAATATATCTATGAAACTTATGGGGATACTTGGGCAGGAGTAGAAGCTATAATAAGAATCCTACAACAACTGCTGTTTATTCATTTCAGAATTGGGTGTCAACATAGCAGAATAGGCATTATTCCACGGAGAAGAGCAAGAAATGGAGCCAGTAGATCCTAGACTAGAGCCCTGGAAGCATCCAGGAAGTCAGCCTAGGACTGCTTGCACCAATTGCTATTGTAAAAAGTGTTGCTTTCATTGTCAAGTTTGCTTCTTAAGAAAAGGCTTAGGCATCTCCTATGGCAGGAAGAAGAGGAGACAGCGACGAAGAACTCCTCCAGGCAGTCAGGCTCATCAAGTTTCTCTATCAAAACAGTAAGTAGTACATGTAATGCAATCTTTAGTAATATTAGCAATAGTAGCATTAGTGGTAGCAGCAATAGTAGCAATAGTTGTGTGGACCATAGTATTCTTAGAATATAGGAAAATATTAAGGCAAAGAAAAATAGACAGATTAATTGATAGAATAAGAGAAAGAGCAGAAGACAGTGGCAATGAGAGCGATGGGGATGAGGAAGCATTGTCAGCACTTGTGGAGCGGGGGCATCTTGCTCCTTGGGATATTGATGATCTGTAGTGCTACAACAAACTTGTGGGTCACAGTCTATTATGGGGTACCTGTGTGGAAAGAAGCAACCACCACTCTGTTTTGTGCATCAGATGCTAAAGCATACAAAGCAGAGGCACATAAYGTCTGGGCTACACATGCCTGTGTACCCACAGACCCCAACCCACAGGAAGTAAATTTAACAAATGTGACAGAAAATTTTAACATGTGGAAAAATAACATGGTGGACCAGATGCATGAGGATATAATCAGTTTATGGGATCAAAGCCTAAAGCCATGTGTAAAATTAACCCCACTCTGTGTCACTTTAAATTGTACTGATAAGTTGGGGAATGGTACGTCACCTCTTCTAATAATACCACCTTGGCTCCTAATGTTACCATCTCGGAGGAAATGAAAAACTGTTCTTTCAATATAACCACAGAGATAAGAGATAAGCAGAAAAAAGAATATGCACTTTTTTATAAACTTGATGTAGTACAAATCAATAACAGTAATACTAGTTATAGGCTAATAAATTGTAATACCTCAACCCTTACACAGGCTTGTCCCAAGGTGTCCTTTGACCCAATTCCCATACATTATTGTGCTCCTGCTGGCTTTGCGATTCTAAAGTGTAATAATAAAACATTCAATGGGACAGGATTATGCAGGAATGTTAGCACAGTACAATGTACACATGGAATTAAACCAGTGGTATCAACTCAACTACTGTTAAATGGCAGCCTAGCAGAAGAAAAGATGATAATTAGATCTGAAAATATCTCAGATAATACAAAAACCATAATAGTACAGTTTAAAAATCCTGTAAAAATTAATTGTACAAGACCCAACAACAATACAAGAAGAAGTATACATATAGGACCAGGACGAGCATTCTATGCAACAGGTGAGATAATAGGAGATACAAGAAAGGCACATTGTAACATTAGTGAAAAACAGTGGTATGACACTTTAATAAAGATAGCTACAGAGTTCAAAGACCAATATAATAAAACAGTAGGGTTTCAACCATCAGCAGGAGGGGATCTAGAAATTACAACACATAGTTTTAATTGTAGAGGAGAATTTTTCTACTGCAACACAACTATTCTGTTTAATCACACAAGAGTAAATGACATTCTGTCTAATAATCACACGAGAGAAAATGACACTATCACTCTTCCATGTAGAATAAAACAAATTGTAAACATGTGGCAAAGAGTAGGACAGGCAATGTATGCCCCTCCCATTGCCGGAAAAATTCAGTGTAACTCAAATATCACAGGTCTACTATTAACAATAGATGGTGGGGAGGGAAATGAGTCCGAGACCCTCAGACCTGGAGGGGGAGATATGAGAGACAATTGGAGAAGTGAACTATATAAATATAAGGTAGTAAAAATTGAACCACTAGGAGTAGCACCCACCAAGGCAAAAAGACAAGTGGTGCAGAGAGAAAAAAGAGCAGTGGGAATGGGAGCTATGTTCCTTGGGTTCTTGGGAGCAGCCGGAAGCACTATGGGCGCGGCGTCAATAACGCTGACGGTACAGGCCAGAAACTTATTGTCTGGTATAGTGCAGCAGCAAAGCAATTTGCTGAAAGCTATTGAAGCGCAACAGCATCTGTTGCAGCTCACAGTCTGGGGCATTAAACAGCTCCAGGCGAGAATCCTGGCTGTGGAAAGATACCTAAAGGACCAACAGCTCCTAGGGATTTGGGGCTGCTCTGGAAAACTCATCTGCCCAACTACTGTGCCTTGGAATCTTAGTTGGAGTAATAAATCTCAAGATGAAATTTGGGGAAACATGACATGGATGGAATGGGAAAAGGAGATTGGCAATTACACAGACACAATATACAGATTAATTGAAAGTGCACAAAATCAGCAGGAAAAGAATGAACAGGACTTATTGGCATTGGACAAGTGGGACAATCTGTGGAATTGGTTTTCTATAACAAGATGGTTGTGGTACATAGAAATATTCATAATGATAATAGGAAGCTTGATAGGATTAAGAATAGTTTTTACTGTGCTTTCTATAATAAATAGAGTTAGGCAGGGATACTCACCTTTGTCATTGCAGACCCTTATCCCAAACTCGAGGGGACCCGAAAGGCCCGGAGGAATCGAAGAAGAAGGTGGAGAGCAAGACAAAGACAGATCCATCAGATTAGTGAGCGGATTCTTAGCACTTGCCTGGGACGACTTCAGGAGCCTGTGCGTCTTCAGCTACCACTGCTTGAGAAACTTCATATTAATTGCAGCGAGGACTGTGGACAAGGGACTGAAAAGGGGGTGGGAAGTCCTCAAATATCTGTGGAATCTCGCGCAGTATTGGGGTCAGGAACTAAAGAATAGTGCTATTAGTCTGTTGGATAGAACAGCAATAGCAGTAGCTGAAGGAACAGATAGAATCATAGAAATTTTGCAAAGAGCTGGTAGAGCTGTTCTCAACATACCTAGAAGAATAAGACAGGGTCTTGAAAGAGCTTTGCTATAAAATGGGTGGCAAGTGGTCAAAAAGTAGTATAGTTGGATGGCCTGCTATAAGGGAAAGAATAAGAGCAGCAGAAGGGGTAGGAGCAGTGTCTCAAGACTTAGATAAACGTGGGGCAATTACAAACAGCAATACTGGGGCTACTAATGCTGACTTGGCCTGGCTAGAAGCGCAAGAGGAGGAAGTAGGTTTTCCAGTCAGACCTCAGGTACCTTTAAGACCAATGACTTATAAGGCAGCCCTGGATCTCAGTCACTTTTTAAAAGAAAAGGGGGGACTGGAAGGGTTAATTTACTCCAGGAAAAGACAAGAAATTCTTGATTTGTGGGTCTACCACACACAAGGCTACTTCCCTGATTGGCAGAACTACACACCAGGGCCAGGGCCCAGATTTCCACTGACCTTTGGATGGTGCTTCAAGCTAGTACCAGTTGATCCAGAGGAGGTAGAAAAGGCCAATGAAGGAGAGAACAACTGTTTGTTACACCCTATGAGCCTACATGGAATGGAGGATGACGACAAGGAAGTGTTAAAGTGGCAGTTTGACAGCCGCCTAGCGCTGAGACATATAGCCAGAGAGAGACATCCGGAGTACTACAAAGAC
>B.GB.86.GB8.AJ271445_F2.CM.97.CM53657.AF377956
GGAAGGGCTAATTTGGTCCCAAAAAAGACAAGAGATCCTTGATCTGTGGGTCTACCACACACAAGGCTACTTCCCTGATTGGCAGAACTACACACCAGGGCCAGGGACCAGATTCCCACTGACCTTTGGATGGTGCTTTAAACTAGTACCAGTTGAGCCAGAGGAGGTAGAAAAGGCCAATGAAGGAGAGAACAACTGTTTGTTACACCCTATGAGCCAGCATGGGATAGAGGACCCAGAGAAAGAAGTGTTAGTGTGGAAGTTTGACAACCGCCTAGCATTTCATCACATGGCCCGCGAACCGCATCCGGAGTTTTACAAAGACTGCTGACATCCGGAGTTACAAGGGACTTTCCGCTGGGGACTTTCCAGGGGAGGCGTGGCCTGGGCGGGACCGGGGAGTGGCGAGCCCTCAGATGCTGCATATAAGCAGCTGCTTTTTGCCTGTACTGGGTCTCTCTAGTTAGACCAGATCTGAGCCCGGGAGCTCTCTGGCTAACTGGGGAACCCACTGCTTAAGCCTCAATAAAGCTTGCCTTGAGTGCTTTAAGTAGTGTGTGCCCGTCTGTTGTGTGACTCTGGTAGCTAGAGATCCCTCAGACCCTTTTAGTCAGTGTAGAAAATCTCTAGCAGTGGCGCCCGAACAGGGACTTGAAAGTGAAAGTTGAACCAGAGGAGCTCTCTCGACGCAAGGACTCGGCTTGCTGAAGCGCGCGCGGCAAGAGGCGAGGGGCGGCGACTGGTGAGTACGCCAAAAATTTTGACTAGCGGAGGCTAGAAGGAGAGAGATGGGTGCGAGAGCGTCAGTATTAAGCGGGGGAGAATTAGATAGATGGGAAAAAATTCGGTTAAGGCCAGGGGGAAAGAAAAAATATAGATTAAAACATGTAGTATGGGCAAGCAGGGAGCTAGAACGATTCGCAGTTAATCCTGGCCTGTTAGAAACATCAGAAGGCTGTAGACAAATACTAGAACAGCTACAACCATCCCTTCAGACAGGATCAGAAGAACGTAGATCATTATTTAACACAGTAGCAACTCTCTATTGTGTACATCAAAGGATAGATGTAAAAGACACCAAGGAAGCTTTAGATAAGATAGAGGAAGAGCAAAGCAAAAGTAAGAAAAAAGCACAGCAAGCAGCAGCTGACAAGGGAAACAGCAACAGCAACCAGGTCAGCCAAAATTACCCTATAGTGCAGAACCTCCAGGGGCAAATGGTACATCAGGCCATATCACCTAGAACTTTAAATGCATGGGTAAAAGTAGTAGAAGAGAAGGCTTTCAGCCCAGAAGTAATACCCATGTTTTCAGCATTAGCAGAAGGAGCCACCCCACAAGATTTAAACACCATGCTAAACACAGTGGGGGGACATCAAGCAGCCATGCAAATGTTAAAAGAGACCATCAATGAGGAAGCTGCAGAATGGGATAGAGTGCATCCAGTGCATGCAGGGCCTGTTGCACCAGGCCAGATGAGAGAACCAAGGGGAAGTGACATAGCAGGAACTACTAGTACCCTTCAGGAACAAATAGGATGGATGACAAATAATCCACCTATCCCAGTAGGAGAGATCTATAAAAGATGGATAATCCTGGGATTAAATAAAATAGTAAGAATGTATAGCCCTGTCAGCATTCTGGACATAAGACAAGGACCAAAGGAACCCTTTAGAGATTATGTAGACCGGTTCTATAAAACTCTAAGAGCCGAGCAAGCTTCACAGGATGTAAAAAATTGGATGACAGAAACCTTGTTGGTCCAAAATGCAAACCCAGATTGTAAGACTATTTTAAAAGCATTGGGACCAGCAGCTACACTAGAAGAAATGATGACAGCATGTCAGGGAGTGGGGGGACCCGGCCATAAAGCAAGAGTGTTGGCTGAAGCAATGAGCCAAGTAAATTCAGCTACCATAATGATGCAGAAAGGCAATTTTAGGAGCCAAAGAAAGACTGTTAAGTGTTTCAATTGTGGCAAAGAAGGGCACATAGCCAGAAATTGCAGGGCACCTAGGAAGAAGGGCTGTTGGAAATGTGGAAAGGAAGGACACCAGATGAAGGAGTGTACTGAGAGACAGGCTAATTTTTTAGGGAAGATCTGGCCTTCCCACAAGGGAAGGCCAGGGAATTTTCTCCAGAGCAGACCAGAGCCAATAGCCCCACCAGAGCCGACAGCCCCACCAGAAGAGAGCTTCAGGTTCGGGGGAGAGACAACAACTCCCTCACAGAAACAGGAGCCGATAAACAAGGAACCGTATCCTTTAGCTTCCCTCAGATCACTCTTTGGCAACGACCCATCGTCACAATAAAGATAGGGGGGCAGCTAAAGGAAGCTCTATTAGATACAGGAGCAGATGATACAGTATTAGAAGACATGAATTTGCCAGGAAGATGGAAACCAAAAATGATAGGGGGAATTGGAGGTTTTATCAAAGTAAAACAATATGATCAGATACTCGTAGAAATCTGCGGACATAAAGCTATAGGTACAGTATTAGTAGGACCTACACCTGTCAACATAATTGGAAGAAATCTGTTGACTCAGCTTGGTTGCACTTTAAATTTTCCCATTAGTCCTATTGAGACTGTACCAGTAAAATTAAAGCCAGGAATGGATGGCCCAAAAGTTAAACAATGGCCATTGACAGAAGAAAAAATAAAAGCATTAGTAGAGATTTGTACAGAAATGGAAAAGGAAGGAAAAATTTCAAAAATTGGGCCTGAAAATCCATACAATACTCCAGTATTTGCCATAAAGAAAAAAGACAGTACTAAATGGAGAAAATTAGTAGATTTCAGAGAACTTAATAAGAGAACTCAAGACTTCTGGGAAGTTCAATTAGGAATACCACACCCCTCGGGATTAAAAAAGAAAAAATCAGTAACAGTACTGGATGTGGGTGATGCATACTTTTCAGTTCCCTTAGATAAAGAATTCAGAAAGTATACTGCATTTACCATACCTAGTATAAACAATGAGACACCAGGGATTAGATATCAGTACAATGTGCTTCCACAGGGATGGAAAGGATCACCAGCAATATTCCAAAGTAGCATGACAAAAATCTTAGAGCCCTTTAGAAAACAAAATCCAGAAATAGTTATCTATCAATACATGGATGATTTGTATGTAGGATCTGACTTAGAAATAGGGCAGCATAGAACAAAAATAGAGGAACTAAGACAACATCTGTTAAGGTGGGGGTTTAGCACACCAGACAAAAAACATCAGAAAGAACCTCCATTTCTTTGGATGGGTTATGAACTCCATCCTGATAAATGGACAGTACAGCCTATAGTGCTGCCAGAAAAAGACAGCTGGACTGTTAATGACATACAGAAGTTAGTGGGAAAATTGAATTGGGCAAGTCAGATTTATCCAGGGATTAAAGTAAGGCAATTATGTAAACTCCTTAGGGGAGCCAAAGCACTAACAGAAGTAATAACACTGACAGAAGAAGCAGAGCTAGAACTGGCAGAAAACAGGGAGATTCTAAAAGAGCCAGTACATGGAGTGTATTATGACCCATCAAAAGACTTAGTAGCAGAGATACAGAAGCAAGGGCTAGGCCAATGGACATATCAAATTTATCAAGAGCCATTTAAAAATCTGAAAACAGGAAAGTATGCAAAAATGAGGGGTGCCCACACTAATGATGTAAAACAGTTAACAGAGGCAGTGCAAAAAATAGCCACAGAAAGCATAGTAATATGGGGAAAGACTCCTAAATTTAAGCTACCCATACAAAAAGAAACATGGGAAGCATGGTGGATGGAGTATTGGCAGGCCACCTGGATTCCTGAGTGGGAGTTTGTCAATACCCCTCCCTTAGTGAAATTATGGTATCAGTTAGAGAAAGAACCCATAATAGGAGCAGAAACTTTCTATGTAGATGGAGCAGCTAATAGAGAGACCAAAATAGGAAAAGCAGGATATGTTACTGACAGAGGAAGACAAAAAGTTGTCCCCCTAACTGAGACAACAAATCAGAAGACTGAATTACAAGCAATTCATTTAGCTTTGCAGGACTCAGGATCAGAAGTAAACATAGTAACAGACTCACAGTATGCATTAGGAATCATTCAAGCACACCCAGATAAGAGTGAATCAGAGTTAGTCAACCAAATAATAGAGCAATTAATACAAAAAGAAAGGGTCTACCTGTCATGGGTACCAGCACATAAAGGAATTGGAGGAAATGAACAAGTAGATAAATTAGTCAGTGCTGGCATCAGGAAAGTACTGTTTTTGGATGGGATAGATAAGGCTCAAGAAGAACATGAAAAATATCACAGCAATTGGAGAGCAATGGCTAGTGATTTTAATTTGCCACCTGTAGTAGCCAAAGAAATAGTAGCCAGCTGTGATAAATGTCAGCTAAAAGGGGAAGCCATGCATGGACAAGTAGACTGCAGTCCAGGGATATGGCAACTAGATTGTACACATTTAGAAGGAAAAATTATCTTGGTAGCAGTCCATGTGGCTAGTGGTTATATAGAAGCAGAAGTTATCCCAGCAGAAACGGGACAGGAAACAGCCTACTTCCTACTAAAGTTAGCAGGAAGATGGCCAGTAAAAATAATACATACAGATAATGGCAGCAATTTCACCAGTACTGTGGTTAAGGCAGCCTGTTGGTGGGCAGGTATCCAGCAGGAATTTGGAATTCCCTACAATCCTCAAAGTCAAGGAGTAGTAGAATCTATGAATAAAGAATTAAAGAAAATTATAGGACAGGTAAGAGATCAAGCTGAACATCTTAAGACAGCAGTACAAATGGCAGTATTCATTCACAATTTTAAAAGAAAAGGGGGGATTGGGGGGTACAGTGCAGGGGAAAGAATAATAGACATAATAGCAACAGACATACAAACTAAAGAATTACAAAAACAAATTACAAAAATTCAAAACTTTCGGGTTTATTTCAGGGACAGCAGAGACCCAATTTGGAAAGGACCAGCAAAGCTACTCTGGAAAGGTGAAGGGGCAGTAGTCATACAAGACAATAATGAAATAAAAGTAGTACCAAGAAGAAAAGCAAAAATCATTAGGGATTATGGAAAACAGATGGCAGGTGATGATTGTGTGGCAGGTAGACAGGATGAGGATTAGAACATGGAACAGTTTAGTAAAACATCATATGTATGTTTCAAGGAGAGCTAAAGGATGGTTTTATAGACATCACTATGAAAGCAGGCATCCAAGAGTAAGCTCAGAAGTACACATCCCACTAAAGGATGATTCTAAATTAGTAATAGTAAGCTATTGGGGTCTACATACAGGAGAAAGAGATTGGCATTTGGGTCAAGGAGTCTCCATAGAATGGAGGCAGAAAAGATATAGGACACAAGTAGACCCTGGCTTGGCAGACCAATTAATTCATTTGTATTACTTTGATTGTTTTTCAGAATCTGCCATAAGGAAAGCCATATTAGGACAGAGAGTTAGTCCTAGGTGTAACTATCAAGCAGGACATAACAAGGTAGGATCCCTACAATATTTGGCACTAACAGCATTAATAACCCCAAAGAAGATAAAGCCGCCTTTGCCTAGTGTCAGGAAACTAGTAGAGGATAGATGGAACAACCCCCAGAAGACCAGGGGCCACAGAGGGAGCCACACAATGAATGGACACTAGAGCTTTTAGAGGAGCTTAAGCATGAAGCTGTTAGACATTTCCCTAGGGAGTGGCTCCATGGCTTAGGACAGCATATCTACAACACCTATGGGGATACTTGGGAGGGAGTTCAAGCTATAATAAGAACACTGCAACAACTACTATTTATCCATTTCAGAATTGGGTGTCATCATAGCAGAATAGGCATTATTCGACAAAGAAGACTAAGAAATGGAAATGGTAGATCCTAAACTAGAGCCCTGGAATCATCCAGGAAGTCAGCCTGAGACTCCTTGTAATAAATGTTACTGTAAAAAGTGTTGCTTTCATTGCCAATTGTGCTTTACAAGGAAGGGCTTAGGCATCTCCTATGGCAGGAAGAAGCGGAGACAGCGACGAAGAGCTTCTCAAAGCAGTGAGATACATCAAAATCCTGTACCAAAGCAGTAAGTAGCATATGTAATGTCATCTTTGCTAACAATAGCAATAGTAGCATATATAGTAGCAATACTAATAGCAATAATTGTGTGGACTATAGTGTATATAGAATATAAGAAACTGTTAAGGCAAAAAAGAATAAATAAGTTATATAAAAGAATAAGAGAAAGAGCAGAAGACAGTGGCAATGAGAGTGAGGGAGATGCAGAGGAATTGGCAGCACTTGGGGAAATGGGGCCTTTTATTCCTGGGGATATTAATAATCTGTAATGCTGCAGATAACTTGTGGGTCACAGTCTATTATGGAGTACCTGTGTGGAAAGAAGCAACCACTACTCTATTTTGTGCATCAGATGCTAAAGCATATGAAAGAGAGATACATAATGTCTGGGCTACATATGCCTGTGTACCTACAGACCCCAACCCACAAGAATTAGTTCTGGGAAATGTAACAGAAAATTTTAACATGTGGAAAAATAACATGGTAGACCAGATGCATGAAGATATAATCAGTTTATGGGATCAAAGCCTAAAGCCATGTGTACAGATAACCCCACTCTGTGTAACCTTAAATTGTACTGATGTTCCTGTTAACATCACTAATGGGAACAGCACCCTGGATAACATCACCCTGGAAGAACAAGGGGAAATAAAAAACTGTTCTTTCAATATCACCACAGAGATAAACGATATTAAGAAAAAAGAATCTGCAATTTTTTATAGGCTTGATGTAGTACCAATCAATAATAGTACTAGTGAATATAGGCTACTAAGTTGTAATACCTCAACCGTTACACAGGCTTGTCCAAAGGTGTCCTTTGATCCAATTCCAATACATTATTGTGCTCCTGCTGGTTTTGCGATTCTAAAGTGTAATGATAAAGAGTTCAATGGGACAGGGTTATGTAGGAATGTCAGCACAGTACAATGTACACATGGAATTAAACCAGTAGTGTCAACTCAACTACTGTTAAATGGCAGCCTAGCAGAAGGAGATATAGTAATTAGATCTGAAAATATCTCAGATAATGCAAAAACCATAATAGTACAGTTTAATAGATCTGTAGCAATTAACTGTACAAGACCCACCAACATTACAAGAAGAAGTATGCGTATAGGACCAGGACGAGTATTTTATGCAACAGGTACCGTACTAGGAGATATAAGAAAGGCATATTGTACCATTAATGGAACACTGTGGAATAAAACTTTAGAAGGAGTAGCTAAAGAGGTCCAAAGCCACCTTAATAAATCAATAACATTTGCGCCATCATCAGGAGGGGACCTAGAAGTTACAACACATAGTTTTAATTGTAGAGGAGAGTTTTTCTACTGCAACACAGTAGCTCTGTTTAATGCAACTAACATGACTAATGCAATGAACAGGTCCAATGGCATTATCACTCTTCCATGTAGAATAAGACAAATTGTAAACATGTGGCAAAGAGTAGGACGAGCAATGTATGCCGCTCCCATTGCTGGACAAATTCAGTGTAACTCAAGCATCACAGGTCTAATATTGACAAGAGATGGTGGGAAAAATAATACCAATAATGACACCCTCAGACCTGGAGGGGGAGATATGAGAGACAATTGGAGAAGTGAACTGTATAAATATAAGGTAGTAAAAATTGAACCACTAGGAGTAGCACCCACCAAGGCAAAAAGACAAGTGGTGAAGAGAGAAAGAGAAAAAAGAGCAGTGGGAATAGGAGCTGTGCTCCTTGGGTTCTTGGGAGCAGCAGGAAGCACTATGGGCGCGGCGTCAATGACGCTGACGGTACAGGCCAGACAATTATTGTCTGGTATAGTGCAACAGCAAAACAATTTGCTGAAGGCTATAGAAGCGCAACAGCATCTGTTGCAGCTCACAGTCTGGGGCATTAAACAGCTCCAGGCGAGAATCCTGGCTGTGGAAAGATACCTAAAGGACCAACAGCTCCTAGGGATTTGGGGATGCTCTGGAAAACTCATCTGCACCACTAATGTGCCCTGGAATTCTAGTTGGAGTAATAAATCTCAGAATGAAATTTGGGAGAACATGACCTGGATGCAGTGGGAAAAAGAGATCAGTAATTACACAGGCACAATATACAAATTAATAGAAAATGCACAAAACCAGCAGGAAAAGAATGAACAGGACTTATTGGCATTGGACAAATGGGACAATCTGTGGAGTTGGTTTACTATAACAAATTGGTTGTGGTACATAAAATTATTCATAATGATAGTAGGAGGCTTGATAGGATTAAGAATAGTTTTTGCTGTGCTTGCTGTAATAAATAGGGTTAGGCAGGGATACTCACCTTTGTCGTTACAGACCCTTACCCCAAGCCGGAGGGAACCCGAACGGCCCGGAGGAATCGAAGAAGAAGGTGGAGAGCAAGACAAAACCAGATCCGTCAGATTAGTGAGCGGATTCTTAGCACTTGCCTGGGACGACCTACGGAGCCTGTGCCTCTTCAGCTACCGCCACTTGAGAGACTTCATATTAATTGCAGCGAGGACTGTGAACAAGGGACTAATAAGGGGGTGGGAAATCCTCAAATATCTGGGGAATCTCGCGCAGTATTGGGGCCGGGAAATAAAGAATAGTGCTATTGATCTGCTTAATACCACAGCAATAGTGGTAGCTGAAGGGACAGATAGAATCATAGAAGTTCTGCAAAGAGCTGGTAGAGCTATTCTCCACATACCTAGAAGAATAAGACAGGGTGCAGAAAGGGCTTTGCTATAAAATGGGTGGCAAGTGGTCAAAAAGTAGTAAAGTTGGATGGCCTACTATAAGGGAAAGAATAAGACAAACCCCTGCAGCAGCACCAGGGGTGGGAGCAGTGTCTCAAGACTTAGATAAACATGGGGCAATTACAAGCAGCCAGACTAGGGATACTAATAGTGACTTGGCATGGCTAGAAGCGCAAGAGGATGAGGAGGTAGGTTTCCCAGTCAGACCTCAGGTACCTTTAAGACCAATGACTTATAAGGGAGCTTTCGATCTCAGTTTCTTTTTAAAAGAAAAGGGGGGACTGGAAGGGTTAATTTACTCCAAGAGAAGACAAGAAATCCTTGATCTGTGGGTCTACCACACACAAGGCTACTTCCCTGATTGGCAGAACTACACACCAGGGCCAGGGACTAGATATCCACTGACCTTTGGATGGTGCTTCAAGCTAGTACCAGTTGAGCCAGAGGAGGTAGAAAAGGCCAATGAAGGAGAGAACAACTGTTTATTGCACCCTATGAGCCAACATGGAATGGAGGACGAAGACAGGGAAGTGTTAAAGTGGAAGTTTGACAGCTCCCTAGCACGGAGACACAGAGCCAGAGAGATGCATCCGGAGTACTACAAAGACTGAGAAACTGCTGATACAGAAGATTCTAAAAGGGACTTTCCGCTGGGGACTTTCCAGAGGGCGTTCCAGAGGGCGGGACCGGGGAGTGGCTAACCCTCAGATGCTGCACATAAGCAGCTGCTTTGCGCCTGTACTGGGTCTCTCTGGCTAGACCAGATTTGAGCCTGGGAGCTCTCTGGCTAGCTAGGGAACCCACTGCT
>B.CA.x.HDM003V01.DQ322227_G.KE.93.HH8793_12_1.AF061641
ACGCCAAAACTTTTGACTAGCGGAGGCTAGAAGGAGAGAGATGGGTGCGAGAGCGTCAGTACTAAGCGGGGGAAAATTAGATACATGGGAAAAAATTCGGTTAAGGCCAGGGGGAAAGAAAAAATATAAATTAAAACATCTAGTATGGGCAAGCAGGGAGCTAGAACGATTTGCAGTTAACCCTGGCCTGTTAGAGACATCAGAAGGCTGTAAACAAATAATACAACAGTTACAACCAAGCCTTCAGACAGGATCAGAAGAACTTAAATCATTATTTAATACAGTAGCAACCCTCTATTGTGTACATCAAAGGATAGATGTAAGAGACACCAAGGAAGCGTTAGACAAGATAGAGGAAGAACAAGCCAAAAGTAACAAAAAGGTACAGCAAGCAGCAGCTGACACAGGAAATAACAGTCAGGTCAGCCAAAATTACCCTATAGTGCAGAACTTGCAGGGGCAAATGGTACACCAAGCCATATCACCTAGAACTTTAAATGCATGGGTAAAGGTAGTAGAAGAGAAGGCTTTCAGCCCAGAGGTAATACCCATGTTTTCAGCATTATCAGAAGGAGCCACCCCACAAGATCTAAACACCATGCTAAACACAGTGGGGGGACATCAAGCAGCCATGCAAATGTTAAAAGAGACCATCAATGAGGAAGCTGCAGAGTGGGATAGATTGCATCCAGTGCATGCAGGGCCTGTTGCACCAGGCCAAATGAGAGAACCAAGGGGAAGTGATATAGCAGGAACTACTAGTACCCTTCAGGAACAAATAGGATGGATGACAAATAATCCACCTATCCCAGTAGGAGAAATTTACAAAAGATGGATAATTATAGGATTAAATAAAATAGTAAGGATGTATAGTCCTACCAGCATTTTGGACATAAGACAAGGACCAAAGGAACCCTTTAGAGAYTATGTAGACCGGTTCTATAAAACTCTAAGAGCCGAGCAAGCTTCACAGGAGGTAAAAAATTGGATGACAGAAACCTTGTTGGTCCAAAATTCGAACCCAGATTGTAAGACTATTTTAAAAGCATTGGGACCAGCAGCTACACTAGAAGAAATGATGACAGCATGTCAGGGAGTGGGAGGACCCGGACATAAAGCAAGAGTCTTGGCTGAAGCAATGAGCCAAGTAACAAGTTCAGCTAACATAATGATGCAGAGAGGCAATTTTAAGGGCCAAAGAAAAATTGTTAAGTGTTTYAATTGTGGCAAAGAGGGACACATAGCTAGAAATTGCAGGGCCCCTAGGAAAAAGGGCTGTTGGAAATGTGGAAAGGAGGGACACCAAATGAAAGATTGTAATGAGAGACAGGCTAATTTTTTAGGGAGAATCTGGCCTTCCCACAAGGGGAGGCCAGGGAATTTTCTTCAGAGCAGACCAGAGCCAACAGCCCCACCAGAGGAGAGCTTCAGGTTTGGGGAGGAGACAGCAACTCCCTCTCAGAAGCAGGAGCCGATAGACAGGGACAAGGAACTGTATCCTTTAGCTTCCCTCAGATCACTCTTTGGCAACGACCCCTCGTCAACATAAGGATAGGGGGACAATTAAAGGAAGCTCTATTAGATACAGGAGCAGATGACACAGTATTAGAAGACATGAGTTTACCAGGAAGATGGAAACCAAAAATGATAGGGGGAATTGGAGGTTTTATTAAAGTAAGACAGTATGATCAGATACCCATAGAAATCTGTGGACATAAAGCTATAGGTACAGTATTAGTAGGACCTACACCTGTCAACATAATTGGAAGAAATCTGTTGACTCAGATTGGTTGCACTTTAAATTTCCCCATTAGTCCTATTGAAACTGTACCAGTAAAATTAAAGCCAGGGATGGATGGCCCAAAAGTTAAACAATGGCCATTGACAGAAGAAAAAATAAAAGCATTAGTAGAAATTTGTACAGAAATGGAAAAGGAAGGGAAAATTACAAAAATTGGGCCTGAAAATCCATACAATACTCCAGTATTTGCCATAAAGAAAAAAGACAGTACTAAATGGAGAAAATTAGTAGATTTCAGAGAACTTAATAAGAGAACTCAAGACTTCTGGGAAGTTCAATTAGGGATACCACATCCCGCAGGGTTAAAAAAGAAGAAATCAGTAACAGTACTGGATGTAGGTGATGCATATTTCTCAGTTCCATTAGATGAAAACTTCAGAAAGTATACTGCATTTACCATACCTAGTATAAACAATGAAACACCAGGGATTAGATATCAGTACAATGTGCTGCCACAGGGATGGAAAGGATCACCAGCAATATTCCAAAGTAGTATGACAAAAATCTTAGAGCCTTTTAGAAAACAAAATCCAGACATAGTAATCTATCAATACATGGATGATCTGTATGTAGGATCTGACTTAGAGATAGGGCAGCATAGGACAAAAATAGAGGAACTGAGACAACATCTGTTGAAGTGGGGATTTACCACACCAGACAAAAAACATCAGAAAGAACCCCCATTTCTTTGGATGGGTTATGAACTCCATCCTGATAAATGGACAGTGCAGCCTATAGTGCTGCCAGAAAAGGACAGCTGGACTGTCAATGACATACAAAAGTTAGTGGGAAAATTGAATTGGGCAAGTCAGATTTWTGCAGGAATTAAAGTGAMGCAATTATGTAAACTCCTTAGGGGAACCAAAGCACTAACAGAAGTAATACCACTAACAAAAGAAGCAGAGCTAGAACTGGCAGAAAACAGAGAAATTCTAAAAGAACCAGTACATGGAGTGTATTATGACCCATCAAAAGACTTAATAGCAGAATTACAGAAACAGGGGCAGGGCCAATGGACATATCAAATTTATCAAGAGCCATTTAAGAATCTGAAAACAGGAAAATATGCAAGAATGAGGAGTGCCCACACTAATGATGTAAAACAACTAACAGAGGCAGTGCAAAAAATAACCACAGAAAGCATAGTAATATGGGGAAAGATTCCTAAATTTAAATTACCCATACAAAAAGAAACATGGGAAACATGGTGGACAGAGTATTGGCAAGCCACCTGGATTCCTGAATGGGAGTTTGTCAATACCCCTCCCTTAGTGAAATTATGGTACCAGTTAGAGAAAGAACCCATAGCAGGAGCAGAAACTTTCTATGTAGATGGGGCAGCTAATAGAGATACTAAATTAGGAAAAGCAGGATATGTTACTAACAGAGGAAGACAAAAGGTTGTCCCCCTAACGGACACAACAAATCAGAAAACTGAGTTACAAGCAATTTATCTAGCTTTGCAGGATTCAGGATTAGAAGTAAACATAGTAACAGACTCACAATATGCATTAGGAATCATTCAAGCACAACCAGATAAAAGTGAATCAGAGTTAGTCAGTCAAATAATAGAGCAGTTAATAAAAAAGGAAAAAGTCTACCTGGCATGGGTACCGGCACACAAAGGAATTGGAGGAAATGAACAAGTAGATAAATTAGTCAGTGCTGGGGTCAGGAAAGTACTATTTTTAGATGGAATAGATAAGGCCCAAGAAGACCATGAGAGATATCACACTAATTGGAGAGCAATGGTTAGTGATTTTAACATACCACCTGTAGTAGCAAAAGAAATAATAGCCTGCTGTGATAAATGTCAACTAAAAGGAGAAGCCATACATGGACAAGTAGACTGTAGTCCAGGAATATGGCAACTAGATTGTACACACTTAGAAGGAAAAGTTATCCTGGTAGCAGTTCATGTAGCCAGTGGATATATAGAAGCTGAAGTTATTCCAGCAGAGACAGGGCAGGAAACAGCATACTTTCTCTTAAAATTAGCAGGGAGATGGCCAGTGAAAACAGTACATACAGACAATGGCAGCAATTTCACCAGTGCTACAGTTAAGGCCGCCTGTTGGTGGGCGGGAATCAAACAGGAATTTGGCATTCCCTACAATCCCCAAAGTCAAGGAGTAGTAGAATCTATGAATAAAGAGTTAAAGAAAATTATAGGACAAGTAAGAGATCAGGCTGAACATCTTAAGACAGCAGTACAAATGGCAGTATTCATTCACAATTTTAAAAGAAAAGGGGGGATTGGGGGGTACAGTGCAGGGGAAAGAATAATAGATATAATAGCAACAGACATACAAACTAAAGAACTACAAAAACAAATTACAAAAATTCAAAATTTTCGGGTTTATTACAGGGACAGCAGAGATCCACTTTGGAAAGGACCAGCAAAGCTCCTCTGGAAAGGTGAAGGGGCAGTAGTAATACAAGATAATAGTGACATAAAAGTAGTGCCAAGAAGAAAAGCAAAGATCATTAGGGATTATGGAAAACAGATGGCAGGTGATGATTGTGTGGCAGGTAGACAGGATGAGGATTAGCACATGGAAAAGTCTAGTAAAACATCATATGTATAGGTCAAAGAAAGCTAAGGGATGGTTTTATAGACATCACTATGATAGCAATCATCCAAAAATAAGTTCAGAAGTACACATCCCACTAGGGGATGCTAGATTGGTAATAACAACATATTGGGGTCTGCATACAGRAGAAAGAGACTGGCATTTGGGTCAGGGAGTCTCCATAGAATGGAGGAAAAGGAGATATAGCACACAAGTAGAACCTGGCCTAGCAGACCAACTAATTCATCTGTATTACTTTGATTGTTTTTCAGACTCTGCCATAAGAAAGGCCATARTAGGACATATAGTTAGTCCTAGGTGTGACTATCAAGCAGGACATAACAAGGTAGGATCCCTACAGTACTTGGCACTAGCAGCCTTAATAAAACCAAAACAGATAAAGCCACCTTTGCCTAGTGTTGCAAAGCTGACAGAGGATAGATGGAACAAGCCCCAGAAGACCAAGGGCCACAGAGAGAGCCATACAATGAATGGACACTAGAGCTTTTGGAGGAGCTTAAGCATGAAGCTGTTAGACATTTTCCTAGGCCCTGGCTCCATGGCCTAGGGCAGTATATCTACGACACTTATGGGGATACTTGGGCAGGAGTGATAGCCATAATAAGAATTCTGCAACAACTGCTGTTTACTCATTTCAGAATTGGGTGTCGACATAGCAGAATAGGCATTACTGGTCGACAGAGGAGAACAAGAAATGGAGCCAATCGATCCTAGACTAGAGCCCTGGAAGCATCCAGGAAGTCAGCCTAATACTGCTTGTACCCCTTGCTATTGTAAAAAGTGTTGCTTTCATTGCCAAGTCTGCTTCTTAACAAAAGGCTTAGGCATCTCCTATGGCAGGAAGAAGCGGAGACAGCGACGAAGACCTCCTCTTGACAGTCAGAATCATCAAGCTTCTCTATCAAAGCAGTAAGTAGTACATGTGATGCCTTCTTTATACATAATAACAATAGTAGCATTAGTAGTAGCAGTAATATTAGCAATAATTGTGTGGTCAATAGTATTCATAGAATATAGGAAAATATTAAGACAAAGAAAAATAGACAGGTTAATTGATAGAATAAGAGAAAGAGCAGAGGACAGTGGCAATGAAAGTGAAGGAGATCAGGAAGAATTACTGGCACTTGAGGGAGTGGGGCATATTTTGGAAATGGGGCATCATGCTCCTTGGGATGTTGATGATCTGTAGTGCAGACCAGTTGTGGGTCACAGTCTATTATGGGGTACCTGTGTGGAAAGAAGCAAACACCACTTTATTTTGTGCATCAGATGCCAAAGCATATGATACAGAGGCACATAATGTCTGGGCCACACATGCCTGTGTACCCACAGACCCAAACCCACATGAACAAGAATTGACAAATGTGACAGAAAATTTTAACATGTGGAGCAATAACATGGTAGAACAGATGCATGAGGATATAATCAGTTTATGGGATCAAAGCCTAAAGCCATGTGTAAAATTAACCCCACTTTGTGTTACTTTAAATTGCAATGATGTAAGGAATGCCACTAATGCCAATAGTAGCGAGGGAATGATGGAGAAAGGGGAAATGAAAAACTGCTCTTTTAATATCACCACAGCCATGAACAAGGGGGTGCAGGAACGTGCACTTTTTTATAGCCTTGATGTAGTACCAATAGATAACAGGACATATAGGTTGATAAGTTGTAACACCTCAAAAGTTACACAGGCCTGTCCAAAGATAACCTTTGAGCCAATTCCCATACATTATTGTGCCCCAGCTGGTTTTGCACTTCTAAAGTGTAGGGATAAAAATTTCAATGGAACAGGACCATGTACAAATGTTAGCACAGTACAATGCACACATGGAATTAGGCCAGTAGTATCAACTCAACTGCTGTTAAATGGCAGTCTAGCAGAAGGAGAGGTAATGATTAGATCTAAAAATTTCACAGACAATGCTAAAACCATAATAGTGCAGCTGAATGAAACTGTAGAAATTAAGTGTACAAGACCTAACAACAATACAAGAAAAAGTATAACTATGGGACCAGGGAAAGCATTTTTTACAACAGGAGATATAATAGGAGATATAAGACAAGCACATTGTAACATTAGTAGAGAAAAATGGAATGCAACTTTAGGACAGATAGCTGAAAAATTAAGAGAACAATTTGGGGAAAATAAAACAATAGCTTTTAATCGACCCTCAGGGGGGGACCCAGAAATTGTAATGCACAGTTTTAATTGTGCAGGGGAATTTTTCTATTGTAATACAACAAAACTGTTTAATAGTACTTGGCCTAGAAACAACACTGAAGGGTCTGAAGGAAATGACACAATCACACTCCCATGCAGAATAAAACAAATTATAAACATGTGGCAGGAAGTAGGAAAAGCAATGTATGCCCCTCCCATCAGAGGACAAATTAAATGTTCATCAAATATTACAGGGCTGTTATTAACAAGAGATGGGGGTAATAATGAGACCAATGGGATTGAGACCTTCAGACCTGGAGGAGGAAATATGAAGGACAATTGGAGAAGTGAATTATATAAATATAAAGTAGTACAAATTGAACCATTAGGAATAGCACCCACCAAGGCAAAGAGAAGAGTGGTGCAGAGAGAAAAAAGAGACCTAGGACTAGGAGCTTTGTTAATCGGGTTCTTGGGAGCAGCAGGAAGCACTATGGGCGCAGCGTCAGTGACGCTGACGGTACAGGCCAGGCAATTAATGTCTGGTATAGTGCAACAGCAGAACAATCTGCTGAGAGCTATTGAGGCGCAACAGCACATGTTGCAACTCACAGTCTGGGGCATTAAGCAGCTCCAGGCAAGAGTCCTGGCTGTGGAAAGATACCTACAAGATCAACAGCTCCTAGGGATTTGGGGCTGCTCTGGAAAACTCATCTGCACCACTAATGTGCCCTGGAACGCTAGTTGGAGTAATAAAACTTATAATGACATTTGGGATAACATGACCTGGATACAATGGGACAGGGAAATTAGCAATTACACACAACAAATATACAGCCTAATTGAAGAATCGCAGAACCAGCAAGAAAAAAATGAGCAAGACTTATTAGCATTGGACAATTGGGCAAGTTTGTGGACTTGGTTTGACATAACAAAATGGCTATGGTATATAAAAATATTTATAATGATAGTAGGAGGTCTAATAAGTTTAAAAATAATTTTTGCTGTGCTTTCTATAGTAAATAGAGTTAGGAAGGGGTACTCACCTTTGTCTTTCCAGACCCTTACCCACCACCAGAGGGAACCCGACAGGCCCGAAAGAATCGAAGAAGAAGGTGGAGAGCAAGACAAAGACAGATCCATTCGATTAGTGAGCGGATTCTTAGCTCTTGCCTGGGACGATCTGCGGAGCCTGTGCCTCTTCAGCTACCACCGCTTGAGAGACTTCATCTTGATAGCAGCGAGGACGGTGGAACTTCTGGGACACAACAGTCTCAAGGGACTGAGACTGGGGTGGGAGGGCCTCAAATATTTGTGGAATCTTCTGTTGTATTGGGGTCGGGAGCTAAAGAATAGTGCTATTAATTTGCTTGATACAATAGCAATAGCAGTAGCTAACTGGACAGATAGGGTTATAGAAATAGTACAACGAGCTTTTAGGGCTTTTCTTAACATACCCACAAGGATAAGACAAGGCTTAGAAAGAGCTTTGCTATAAAATGGGAGGCAAATGGTCAAAAAGAGGATGGCCTGCGGTAAGGGAAAGAATAAGACAAACCCCAATAAGACAAACCCCACCAGCAGCAGAAGGGGTAGGAGCAGTATCTCAAGATTTAGCTAGGCATGGAGCAATCACAAGCAGCAATACAGCAACCAATAATCCCGATTGTGCCTGGCTAGAGGCGCAAGAAGAGGATTCAGAGGTAGGCTTTCCAGTTAGACCACAAGTACCTGTGAGACCAATGACCTATAAGGCTGCTTTTGATCTCAGCTTCTTTTTAAAAGAAAAGGGGGGACTGGATGGGCTAATTTACTCCAAGAAAAGACAAGACATCCTTGACTTGTGGGTCTATAATACACAAGGATTCTTCCCAGATTGGCAGAACTACACACCAGGGCCAGGGACCAGACTTCCACTGACCTTTGGGTGGTGCCTCAAACTAGTACCAGTGGATCCAGCAGTGGTAGAGGAAGCCACTACAGAAGAGAACAACAGTCTATTACACCCCATTTGGCAGCATGGAATGGAGGACGAGGACAGAGAAGTGCTGATATGGAGATTTGACAGTAGCCTAGCACGGAGACACCTAGCCCGAGAGCTGCATCCGGAGTTCTATAAGAACTGCTGACACAGAAGTTGCTGACAAGGGGACTTTCCGCCTGGGACTTTCCGGGGAGGCGCGGCATGGGAGGGACTAGGGAGTGGCTAACCCTCAGAAGCTGCATATAAGCAGCCGCTTCTCGCCTGTACGGGGTCTCTCTTGTTGGACCAGATTTGAGCCTGGGAGCTCTCTGGCCTAGCAGGAGAACCCACTGCTTAAAGCCTCAATAAAGCTTGCCTTGAGGGCGCATGCAAGCC
>B.CO.01.PCM001.AY561236_G.CM.01.01CM_4049HAN.AY371121
GCGAGAGCGTCAGTATTAAGCGGGGGAGAATTAGATAGATTTGAAAAAATTCGTTTAAGGCCAGGAGGAAAGAAAAAGTATAAATTAAAACATATAGTATGGGCAAGCAGGGAACTAGAAAGATTTGCAGTTAATCCTGGCCTTCTGGAATCATCAGAAGGTTGTAGACAAATACTGGGACAGCTACAACCATCCCTTCAGACAGGATCAGAAGAGCTTAAATCATTATTTAATACAATAGCAGTCCTCTATTGTGTACATCAAAGGATAGAGGTAAAAGACACCAAGGAAGCTCTAGATAGGATAGAGGAAGAGCAAAACAAAAGTAAGAAAAAAGCACAGCAAGCAGCAGCTGACACAGGAAACAGCAGCCAGGTCAGCCAGAATTACCCTATAGTGCAGAACCTCCAGGGGCAAATGGTACATCAGGCCTTATCACCTAGAACTTTAAATGCATGGGTAAAAGTAGTAGAAGAGAAAGCTTTCAGCCCAGAAGTAATACCCATGTTTTCAGCATTGTCAGAAGGAGCCACCCCACAAGATTTAAACACCATGCTAAACACAGTGGGGGGACATCAAGCAGCCATGCAAATGTTAAAAGAGACCATCAATGAGGAAGCTGCAGAATGGGATAGATTGCATCCAGTGCATGCAGGGCCTATTGCACCAGGCCAGATGAGAGAACCAAGGGGAAGTGACATAGCAGGAACTACTAGTACCCTTCAGGAACAAATAGGATGGATGACACATAATCCACCTATCCCAGTAGGAGAGATCTATAAAAGATGGATAATCTTGGGATTAAATAAAATAGTGAGAATGTATAGCCCCACCAGCATTTTGGACATAAGACAAGGACCAAAGGAACCCTTCAGAGACTATGTAGACCGGTTCTATAAAACTCTAAGAGCAGAGCAAGCTTCACAGGAGGTAAAAAATTGGATGACAGAAACCTTGTTGGTCCAAAATGCGAACCCAGATTGTAAAACTATTTTAAAAGCATTAGGACCAGGAGCTACACTAGAAGAAATGATGACAGCATGCCAGGGAGTGGGAGGACCCGGCCATAAAGCAAGAGTTTTGGCTGAAGCAATGAGCCAAGTAACAAATTCAACTGCCATAATGATGCAGAGAGGCAATTATAAGAACCAAAGAAAACCTGTTAAGTGTTTCAATTGTGGCAAAGAGGGGCACATAGCTAAAAATTGCAGGGCCCCTAGAAAGAAGGGTTGTTGGAAATGTGGAAAGGAAGGACACCAAATGAAAGATTGTATCGAGAGACAGGCTAATTTTTTAGGGAAAATCTGGCCTTCCAACAAGGGGAGGCCAGGGAATTTTCCTCAGAACAGACTAGAGCCAACAGCCCCACCAGAAGAGAGCTTCAGGTTTGGGGAGGAGGTGACAACTCCCCTTCAGAAACAGGAGCCAACAGACAAGGAACTGTATCCTTTAACTTCCCTCAAATCACTCTTTGGCAACGACCCCTCGTCACAATAAAGATAGGGGGACAGCTAAAGGAAGCTCTATTAGATACAGGAGCAGATGACACAGTATTAGAAGAAATGAGTTTGCCAGGGAAATGGAGACCAAAAATGATAGGGGGAATTGGAGGGTTTATCAAAGTAAGACAGTATGATCATATACTCGTAGAAATCTGTGGGCATAAAGCTATAGGTACAGTCTTAGTAGGACCTACACCTGTCAACATAATTGGAAGAAATCTGTTGACTCAGATTGGCTGCACTTTAAATTTTCCCATTAGTCCTATTGAAACTGTACCAGTAAAATTAAAGCCAGGAATGGATGGCCCAAAAGTTAAGCAATGGCCATTGACAGAAGAAAAAATAAAAGCATTAGTAGAAATTTGTACAGAAATGGAAAAGGAAGGAAAAATTTCAAAAATTGGGCCTGAAAATCCATACAATACTCCAGTATTTGCCATAAAGAAAAAAGACAGTACTAAATGGAGAAAATTAGTAGATTTCAGAGAACTTAATAAGAGAACTCAAGACTTTTGGGAAGTTCAATTAGGAATACCACATCCCGCAGGGTTAAAAAAGAAAAAATCAGTAACAGTACTGGATGTGGGGGATGCTTATTTTTCAGTTCCCTTAGATGAAGATTTCAGGAAATATACTGCATTTACCATACCTAGCATAAACAATGAGACACCAGGGGTTAGATATCAGTACAATGTGCTTCCACAGGGATGGAAAGGATCACCAGCAATATTCCAATGTAGCATGACAAAAATCTTAGAGCCTTTTAGAAAACAAAATCCAGACATAGTTATCTATCAATACATGGATGATTTGTATGTAGGATCTGACTTAGAAATAGGGCAGCATAGAACAAAAGTAGAAGAACTGAGAGAACATCTGTTGAAGTGGGGATTTGCCACACCAGACAAAAAACACCAGAAAGAACCTCCATTTCTTTGGATGGGTTATGAACTCCATCCTGACAAATGGACAGTACAGCCCATAATACTGCCAGAAAAAGACAGCTGGACTGTCAATGACATACAGAAGTTAGTGGGAAAATTAAATTGGGCAAGTCAAATTTATCCAGGGATTAAGGTAAAGCAATTATGTAAACTCCTTAGGGGAACCAAAGCCCTAACAGAAGTAGTACCCCTATCAGCAGAGGCGGAGCTAGAATTGGCAGAAAACAGGGAGATTCTAAAAGAGCCAGTACATGGAGTGTATTATGACCCATCAAAAGACTTGATAGCAGAACTACAGAAGCAAGGGCAAGGACAATGGTCATATCAAATTTATCAAGAGCCATTTAAAAATCTGAAAACAGGAAAATATGCAAGAATGAGGGGTACCCACACTAATGATGTAAAACAATTAACAGAAGCAGTGCAAAAAATAGCCACAGAAAGCATAGTAATATGGGGAAAGACTCCTAAATTTAAACTACCCATACAAAAAGAAACATGGGAAGCATGGTGGACAGAGTATTGGCAAGCCACCTGGATCCCTGAGTGGGAGTTTGTCAATACCCCTCCCTTAGTAAAATTATGGTACCAGTTAGAAAAAGAACCCATAGTAGGAGCAGAAACCTTCTATGTAGATGGGGCAGCTAATAGGGATACTAAATCAGGAAAAGCAGGATATGTTACTGACAGAGGAAGACAAAAAGTGGTCTCCCTAACTGATACAACAAATCAGAAGACTGAGTTACAGGCAATTCATCTAGCTTTACAGGATTCGGGACTAGAAGTAAACATAGTAACAGACTCACAATATGCATTAGGAATCATTCAAGCACAACCAGATAAGAGTGAATCAGAATTAGTCAGTCAAATAATAGAGCAGTTAATAAAAAAGGAAAAGGTCTATCTGGCATGGGTACCAGCACACAAGGGAATTGGAGGAAATGAACAAGTAGATAAGCTAGTCAGTGCTGGAATCAGGAAAGTACTGTTTTTGGATGGGATAGATAAAGCTCAGGAAGACCATGAGAAATATCACAGTAATTGGAGAGCAATGGCTAGTGATTTTAACCTGCCACCTATAGTAGCAAAAGAAATAGTAGCCAGCTGTGATAAATGTCAACTAAAAGGAGAAGCCATGCATGGACAAGTAGACTGTAGTCCAGGAGTATGGCAACTAGATTGTACACATTTAGAAGGAAAAATTATCCTGGTAGCAGTTCATGTAGCCAGTGGATATATAGAAGCAGAAGTTATTCCAGCAGAGACAGGGCCGGAAACAGCATACTTTATCTTAAAATTAGCAGGAAGATGGCCAGTAAAAACAATACATACAGATAATGGCAGCAATTTCACCAGCACTACAGTTAAGGCCGCCTGTTGGTGGGCAGGGGTCAAGCAAGAATTTGGCATTCCCTACAATCCCCAAAGTCAAGGAGTAGTAGAATCTATGAATAATGAATTAAAGAAAATTATAGGGCAGGTAAGAGATCAGGCTGAACATCTTAAGACAGCAGTACAAATGGCAGTGTTCATTCACAATTTTAAAAGAAAAGGGGGGATTGGGAGGTACAGTGCAGGGGAAAGAATAGTAGACATAATAGCAACAGACATACAAACTAAAGAATTACAAAAACAGATTACAAAAATTCAAAATTTTCGGGTTTATTACAGGGACAGCAGAGATCCACTTTGGAAAGGACCAGCAAAGCTTCTCTGGAAAGGTGAAGGGGCAGTAGTAATACAAGATAATAGTGACATAAAAGTAGTGCCAAGAAGAAAAGCAAAGATCATTAGGGATTATGGAAAACAGATGGCAGGTGATGATTGTGTGGCAAGTAGACAGGATGAGGATTAGAACATGGAAGAGTTTAGTGAAACACCACATGTATATTTCAAAGAAAGCTAAGGGTTGGTTTTATAGACATCACTATGAAAGCACTCATCCAAAAATAAGTTCAGAAGTACACATCCCACTAGGGGAAAATAGATTAGTAGTAACAACATATTGGGGTCTGCATACAGGAGAAAGAGACTGGCATTTGGGTCAGGGAGTCTCCATAGAATGGAGGAAAAGGAGATATAGCACACAAGTAGACCCTGACCTAGCAGACCAACTAATTCATCTGTATTATTTTGATTGTTTTTCAGAATCTGCTATAAGAAATGCCATATTAGGAAACTTAGTTAGGCCTAGGTGTGAATATCAAGCAGGACATAACAAGGTAGAATCTCTACAGTACTTGGCACTAACAGCATTAATCACACCAAAAAAGATAAAGCCACCGTTGCCTAGTGTTAAGAAACTGACAGAGGATAGATGGAACAAGCCCCGGAAGATCAAGGGCCACAGAGGGAGCCATACAATGAATGGACACTAGAGCTTTTGGAGGAGCTTAAGAGAGTAGCTGTTAGACATTTTCCTAGCTCATGGCTACATGGCCTAGGACAACATATCTATGAAACTTATGGGAATACTTGGGCAGGAGTGGAAGTCTTAATAAGAACCCTGCAACAACTGCTGTTTATTCATTTCAGAATCGGGTGCCGACTTAGCAGAATAGGCATCCAACAGAGAGGAGCAAGAAATGGAGCCAGTAGATCCTAGACTAGAGCCCTGGAAACATCCAGGAAGTCAGCCTAAGACTGCTTGTACCAATTGCTATTGTAAAAAGTGCTGCTTTCATTGCCAAGTTTGTTTCACAAAAAAAGGCTTAGGCATCTCCTATGGCAGGAAGAAGCGGAGACAGCGACGAAGATCTCATCCAGACAGTAAGATTCATCAGGCTCCTCTATCAACTCAGTAAGTACTGCCTGTAATGCACGCTTTACAAATATCAGCAATAGTAGCTTTAGTAGTAACAGCAATAATAGCAATAGTTGTGTGGACCATAGTAGGCTTAGAAATTAGGAAGGTATTAAGACAAAGAAAAATAGACAGGTTAATTGAAAGAATAGCAGAAAGAGCAGAAGACAGCGGCAATGAGAGCGAAGGGGATCAGGAAGAATTGGCAGCACTTGTGGAAATGGGGCACGATGCTCCTTGGGATGTTAATGATATGTAGTGCTACAGAACAATTGTGGGTCACAGTCTATTATGGGGTACCTGTATGGAAAGAAGCAAACACTGTTCTATTTTGTGCCTCAGATGCTAAAGCATATGGTACAGAGGTACATAATGCTTGGGCCACACGTGCCTGTGTACCCACAGACCCCAACCCACAAGAAGTAGTATTGGAAAATGTGACAGAAAATTTTAACATGTGGAAAAATGGCATGGTAGACCAGATGCATGAAGATATAATTAGTTTATGGGATGAAAGCCTAAAGCCATGTGTAAAGCTAACCCCTCTCTGTGTTACGCTAAACTGTACTAATGTCACCACCACCACTAATGGTACTATAGATAATAGCAATAATATCACGGTGGATGGTAAAGAAGAAATAACCAATTGTTCCTTCAATATAACCACAGAAATAAGAGACAAAATAAGGCAGGAATACGCGCTTTTCTATAAACTTGATGTAGTACCAATTAATAATGATAATAGAAGTTATATGCTAATAAATTGTAATGTCTCATCCATTAAACAGGCTTGTCCAAAAGTAGATTTTGAACCAATTCCCATACATTATTGTGCTCCGGCTGGTTTTGCGATTTTAAAGTGTAGAGATAAGAATTTCAATGGAACAGGATCATGTAGAAATGTCAGTACAGTACAATGTACACATGGAATTAAGCCAGTGGTATCAACTCAACTACTGCTGAATGGCAGTTTAGCAGAAGAAAAAATAAGAATTAGATCTGAAAATTTCACAGACAATACCAAAATCATAATAGTGCAGCTTAATGAAACTATAGAAATTGATTGTATCAGACCCAACAACAATACAAGAAAAAGTATAACATTCGGACCAGGACAAGCGTTCTATGCAACAGGTGACATAATAGGAGGCATAAGACAAGCACATTGTAATGTTAGTAAGGCAAAATGGAAGACAATGTTAAAAAATGTCACAACACTTCTACATAAGAAATATAATAAGACCATAATCTTTAAGTCATCCGCAGGAGGGGACCTGGAAATTACCACACATAGCTTCAATTGTAGAGGAGAATTTTTCTATTGTAATACATCAGAACTGTTTAATATTAATATATCAAATAGTAGTACAAATAGTACTGAGAATGAAACTATCACACTCCCATGTAAAATAAAACAAATTGTAAGAATGTGGCAGAGAGTGGGACAAGCAATGTATGCCCCTCCTATCGCCGGAAACATTACATGTAAATCAAACATTACAGGACTAATATTAACAAGAGATGGTGGAAATACTAGGGATAATACCTCAGAGATCTTCAGACCTGGAGGAGGAGAAATGAGAGACAATTGGAGAAATGAATTATATAATTATAAAACAGTAAAAATCAAATCATTAGGAGTAGCACCCACCAGGGCAAGGAGAAGAGTGGTGGAGAGAGAAAAAAGAGCAGTTGGAATAGGAGCTGTCTTCCTTGGGTTCTTAGGAGCAGCAGGAAGCACTATGGGCGCGGCGTCAATAACGCTGACGGTACAGGTCAGACAATTATTGTCTGGCATAGTGCAACAGCAAAACAATTTGCTGAGGGCTATAGAGGCGCAGCAGCATCTGTTGCAACTCACAGTCTGGGGCATTAAACAGCTCCAGGCAAGAGTCCTGGCTGTGGAAAGATTCCTAAAGGATCAACAGCTCCTAGGGATTTGGGGCTGCTCTGGAAAACTCATCTGCACCACTAATGTGCCCTGGAACACTAGTTGGAGTAACAAATCTTTTGATGAAATTTGGAATAACATGACTTGGATAGAATGGGAAAGGGAAATTAATAATTACACACAACAAATATACAACCTAATTGAAATATCGCAGAGCCAGCAGGAAAAGAATGAACAAGAATTATTGGCATTGGACAAGTGGGACAGTCTGTGGAGTTGGTTTGACATAACAAAATGGCTATGGTATATAAAAATATTTATAATGATAGTAGGAGGGTTAATAGGTTTAAGAATAGTTTTTGCTGTGCTTTCTATAGTGAATAGGATTAGGCAGGGATACTCACCTTTGTCATTCCAGACCCTTACCCACCACCAGAGGGAACCCGACAGACTCGGAAGAATCGAAGAAGAAGGTGGAGAGCAAGACAAAAACAGATCCATACGATTAGTGAGCGGATTCTTAGCACTTGCCTGGGACGACCTACGGAGCCTGTGCCTTTTCAGCTACCACCGATTGAGAGACTGTGTCTTGATTGCAGCGAGGACAGCGGAACTTCTGGGACACAGCAGCCTCAAGGGACTGAGACTGGGGTGGGAAGGCCTCAAGTATTGTGGGAATCTCCTGCTGCATTGGGGTCAGGAACTAAAGAATAGTGCCATTAATTTGCTTGATACACTAGCAATAGCAGTAGCTAATTGGACAGATAGGGTTATAGAAGTAGCACAAGGAGCTGGTAGAGCTATTCTCCACATACCTAGAAGAATAAGACAAGGCTTAGAAAGAGCTTTGCTATAAAATGGGAGGCAAGTGGTCAAAAAGTAGCATAGTTGGATGGCCTAAGATAAGAGAAAGAATAAGACAAACCCCTATAGCAGCAGAAGAAGAAGCAGCAGCAGGAGTAGGAGCAGCCAATAATCCTGATAGTGCCTGGCTGGAAGCACAAGAGGAGGATTCAGAGGTAGGCTTTCCAGTCAGACCACAGGTACCTCTAAGACCAATGACTTATAAGGCTGCTTTTGATCTCAGCTTCTTTTTAAAAGAAAAGGGGGGACTGGATGGGCTAGTTTACTCCAAGCAAAGACAAGACATCCTTGATCTGTGGGTCTATCATACACAAGGATTCTTCCCAGACTGGCAGTGCTACACACCAGGGCCAG
>B.US.97.1006_08.AY331284_H.BE.93.VI991.AF190127
ATGGGTGCGAGAGCGTCAGTATTAAGCGGGGGAAAATTAGATAAATGGGAAAAAATTCGGTTAAGGCCAGGGGGAAAGAAAAAGTATAAATTAAAACATCTAGTATGGGCAAGCAGGGAGCTAGAACGATTCGCAGTTAATCCTGGCCTGTTAGAAACATCAGAAGGCTGTAGACAAATACTGAGACAGCTACAACCATCCCTTCAGACAGGATCAGAAGAACTTAAATCATTATTTAATACAGTAGCAGTCCTCTATTGTGTGCATCAAAACATAGAGATAAAAGACACCAAGGAAGCTTTAGACGAGATAGAGGAAGAGCAAAACAAAAGTAAGAAAAAGGCACAGCAAGCAGCGGCTGACACAGGAAATAGCAGCAGCCAGGTCAGCCAAAATTACCCTATAGTGCAGAACCTTCAGGGGCAAATGGTACATCAGGCCATATCACCTAGAACTTTAAATGCATGGGTAAAAGTAGTAGAAGAAAAGGCTTTCAGCCCAGAAGTAATACCCATGTTTTCAGCATTATCAGAAGGAGCCACCCCACAAGATTTAAACACCATGCTAAACACAGTGGGGGGACATCAAGCAGCTATGCAAATGTTAAAAGAGACCATCAATGAGGAAGCTGCAGAATGGGATAGATTGCACCCAGTGCATGCAGGGCCTATTGCACCAGGCCAGATGAGAGAACCAAGGGGAAGTGACATAGCAGGAACTACTAGTACCCTTCAGGAACAAATAGGATGGATGACAAATAATCCACCTATCCCAGTAGGAGAAATCTATAAAAGATGGATAATCCTGGGATTAAATAAAATAGTAAGAATGTATAGCCCTACTAGCATCCTGGACATAAAGCAAGGACCAAAGGAACCCTTTAGAGACTATGTAGATCGGTTCTATAAAACTCTAAGAGCCGAGCAAGCTTCACAGGATGTAAAAAATTGGATGACAGAAACATTGTTGGTCCAAAATGCGAACCCAGATTGTAAGACTATTTTAAAAGCATTGGGACCAGCAGCTACACTAGAAGAGATGATGACAGCATGCCAGGGAGTGGGGGGACCCGGCCATAAAGCAAGAGTTTTGGCTGAAGCAATGAGCCAAATGACAAATTCAGCTGCCATAATGGTGCAGAGAGGCAACTTCAGGGATCAAAGAAAGATCATTAAGTGTTTCAACTGTGGCAAACAGGGGCACATAGCCAAAAATTGCAGGGCCCCTAGGAAAAAGGGCTGTTGGAAATGTGGACAGGAAGGACACCAAATGAAAGATTGTACTGAAAGACAGGCTAATTTTTTAGGGAAGATCTGGCCTTCCCACAAGGGAAGGCCAGGGAATTTCCTCCAGAGCAGACCAGAGCCAACAGCCCCACCAGAGGAGAGCTTCAGGTTTGGGGAAGAGACGACACCTCCCTCTCAGAAGCAGGAACCGATAGACAAGGAACTATATCCCTTAGCCTCCCTCAAATCACTCTTTGGCAACGACCCCTAGTCACAATAAAGATAGGAGGGCAACTAAAGGAAGCTCTATTAGATACAGGAGCAGATGATACAGTATTAGAAGAAATAGATTTGCCAGGAAGATGGAAACCAAAAATGATAGGGGGAATTGGAGGTTTTATCAAAGTTAGACAGTATGATCAGATACCCATAGAGATCTGTGGGCATAAAGCTATAGGTACAGTATTAGTAGGACCTACACCTGTCAACATAATTGGAAGAAATCTGTTGACTCAGATTGGTTGCACTTTAAATTTTCCCATTAGTCCTATTGAGACTGTACCAGTAAAATTAAAGCCAGGGATGGATGGCCCAAAAGTTAAACAGTGGCCATTGACAGAAGAAAAAATAAAAGCATTAGTAGAGATTTGTACAGAAATGGAAAAGGAAGGGAAGATTTCAAAAATTGGACCTGAAAATCCATACAATACTCCGGTATTTGCCATAAAGAAAAAAGACAGTACTAAATGGAGAAAACTAGTAGATTTCAGAGAACTTAATAAAAGAACTCAAGACTTCTGGGAAGTTCAATTAGGAATACCACATCCCGCAGGGTTAAAAAAGAAAAAATCAGTAACAGTACTAGATGTGGGTGATGCATATTTTTCAGTTCCCTTAGATAAAGATTTCAGGAAGTATACTGCATTCACCATACCTAGTACAAACAATGAGACACCAGGGATGAGATATCAGTACAATGTACTTCCTCAGGGGTGGAAAGGATCACCATCAATATTTCAAAGTAGCATGATAAAAATCTTAGAGCCTTTTAGGAAACAAAATCCAGACATAATTATCTATCAATACATGGATGATTTGTATGTAGGATCTGACTTAGAAATAGGACAGCATAGAACAAAAATAGAGGAACTGAGGCAACATCTGTTGAAGTGGGGATTTACCACACCAGACAAAAAACATCAGAAAGAACCCCCATTCCTTTGGATGGGTTATGAGCTCCATCCTGATAAATGGACAGTACAGCCTATAGTGCTGCCAGAAAAAGACAGCTGGACTGTCAATGACATACAGAAGTTAGTGGGAAAATTGAATTGGGCAAGTCAAATTTATGCGGGGATTAAAGTCAGGCAATTATGTAAACTCCTAAGGGGAACCAAAGCACTAACAGAAGTAGTACCACTAACAGAAGAAGCAGAGCTAGAACTGGCAGAAAATAGGGAAATTTTAAAAGAACCAGTACATGGAGCATATTATGACCCATCAAAAGAATTAATAGCAGAAATACAGAAGCAGGGGCTAGGCCAATGGACATATCAAATTTATCAAGAGCCATTTAAAAATCTGAAAACAGGAAAGTATGCAAGAATGAGGGGTGCCCACACTAATGATGTAAAACAATTAACAGAGGCAGTGCAAAAAATAACCACAGAAAGCATAGTAATATGGGGAAAGATTCCTAAATTTAAACTACCCATACAAAAAGAAACATGGGAAGCATGGTGGTTAGAGTATTGGCAAGCCACCTGGATCCCTGAGTGGGAGTTTGTCAATACCCCTCCCTTAGTAAAATTATGGTACCAGTTAGAGAAAGAACCCATAGTAGGAGCAGAAACTTTCTATGTAGATGGGGCAGCTAGTAGGGAGACTAAGTTAGGAAAAGCAGGATATGTTACTGACAGAGGAAGACAAAAGGTTGTCTCCCTAACTGACACAACAAATCAGAAGACTGAGTTACAAGCAATTCATCTAGCTTTGCAGGATTCAGAATTAGAAGTAAACATAGTAACAGACTCACAATATGCATTAGGAATCATTCAAGCACTCCCAGATAAGAGTGAATCAGAATTAGTCAGTCAAATAATAGAACAGTTAATAAAAAAGGAAAAGGTCTACTTGGCATGGGTACCAGCACACAAAGGAATTGGAGGAAATGAACAAGTAGATAAATTAGTTAGTGCTGGAATCAGGAAAATACTATTTTTGGATGGAATAGATAAGGCTCAAGAAGAACATGAGAAATATCACAATAATTGGAGAGCAATGGCTAGTGATTTTAACCTGCCACCTGTAGTAGCAAAAGAAATAGTAGCCAGCTGTGATAAATGTCAGCTAAAAGGAGAAGCCATGCATGGACAAGTAGACTGTAGTCCAGGAATATGGCAACTAGATTGTACACATTTGGAAGGAAAAATTATCCTGGTAGCAGTGCATGTGGCCAGTGGATATATAGAAGCAGAAGTTATTCCAGCAGAAACAGGGCAGGAAACAGCATACTTTATCTTAAAATTAGCAGGAAGATGGCCAGTAAAAACAATACATACAGATAATGGCAGCAATTTCACCAGTACTACGGTTAAGGCCGCCTGCTGGTGGGCGGGGATCAAGCAGGAATTTGGCATCCCCTACAATCCACAAAGTCAAGGAGTAGTAGAATCTATGAATAAAGAATTAAAGAAAATTATAGGACAGGTAAGAGATCAAGCTGAACATCTTAAGACAGCAGTACAAATGGCAGTATTCATCCACAATTTTAAAAGAAAAGGGGGGATTGGGGGGTACAGTGCAGGGGAAAGAATAGTAGACATAATAGCAACAGACATACAAACTAAAGAATTACAAAAACAAATTACAAAAATTCAAAATTTTCGGGTTTATTACAGGGACAGCAGAGATCCACTTTGGAAAGGACCAGCAAAGCTTCTCTGGAAAGGTGAAGGGGCAGTAGTAATACAAGAGAATAGTGACATAAAAGTAGTGCCAAGAAGAAAAGTAAAGATCATTAGGGATTATGGAAAACAGATGGCAGGTGATGATTGTGTGGCAAGTAGACAGGATGAGGATTAGAACATGGAAAAGTTTAGTAAAACATCATATACATGTTTCAAAGAAAGCTAAGGGATGGCTTTATAGACATCACTATGAAAGTCCTCATCCAAGAATAAGTTCAGAAGTACACATCCCACTAGGGGGTGCTAAATTGGTAATAACAACATATTGGGGTCTGCATACAGGAGAAAGAGACTGGCACTTGGGTCAGGGTGTCTCCATAGAATGGAGGAAAAGGAGATATAGCACACAAGTAGACCCTAACCAAGCAGACCAACTAATTCACCTGTACTATTTTGATTGTTTTTCAGAATCTGCTATAAGAAATGCCCTATTAGGACATAGAGTTAGTCCTAGTTGTGAATATCAAGCAGGACATAACAAGGTAGGATCTCTACAGTACTTGGCACTAGCAGCCTTAATACCACCAAGAAGGACAAAGCCACCTTTGCCTAGTGTTACAAAACTGACAGAGGATAGATGGAACAAGCCCCAGAAAACCAAGGGCCACAGAGAGAGCCATACAATGAATGGACACTAGAGCTTTTAGAAGAGCTTAAGAATGAAGCTGTTAGACATTTTCCTAGGGTATGGCTTCATGGCTTAGGACAACATATCTATGAAACTTATGGGGATACTTGGGCAGGAGTGGAAGCCATAATAAGAACTCTGCAACAACTGCTGTTTATTCATTTCAGAATTGGGTGTCAACATAGCAGAATAGGCATTATTCGACGGAGGAGAGCAAGGAATGGAGCCAGTAGATCCTAGACTAGAGCCCTGGAAGCATCCAGGAAGTCAGCCTAAAACTGCTTGTACCAATTGCTATTGTAAAAAGTGTTGCTTTCATTGCCAAGTTTGTTTCACAAAAAAAGCCTTAGGCATCTCATATGGCAGGAAGAAGCGGAGACAACGACGAGGGACTCCTAAGAGCTTGCAGGATCATCAGACTCTTATACCAAAGCAGTAAGTAACATAAATGAATATATTAGGAATAGGAATAGGAGCACTGGTAGTAGCTTTTATCATAGCCATAGTTGTGTGGACCATAGCATATATAGAATATAGGAAACTGTAAAGCAGAGGAAAATAGACAGGTTAATTGAAAGAATAAGAGAAAGAGCAGAAGACAGTGGCAACGAGAGTGATGGAGACACAGAGGAATTATCCAAGCTTGTGGAGATGGGGCACCTTAATCTTGGGTATGTTGCTGATCTGTAGTGTTGTAGGAAACTTGTGGGTCACAGTATATTATGGGGTGCCTGTGTGGAAAGAAGCAAAGACTACTCTATTCTGTGCATCAGATGCTAAAGCATATGACACAGAAAGGCATAATGTATGGGCTACACATGCCTGTGTACCCACAGACCCCAACCCACAAGAAATGGTCTTGGAAAATGTAACAGAAACCTTTAATATGTGGGTAAATGACATGGTAGAACAGATGCATACAGATATAATCAGTTTATGGGATCAGAGCTTAAAGCCATGTGTAAAGTTAACCCCACTCTGTGTTACTCTAGACTGTAGTAGTGTAAATGCAACAAATGTAACAAAAAGTAATAACAGTACAGATATCAATATAGGAGAGATACAGGAACAAAGAAACTGCTCTTTCAATGTAACTACAGCCATAAGAGATAAGAACCAGAAGGTACATGCACTCTTTTATAGAGCTGACATAGTACAGATTGATGAAGGTGAAAGAAATAAAAGTGATAATCATTATAGGCTAATAAATTGTAATACCTCGGTCATTAAACAAGCTTGCCCAAAGGTGTCCTTTGAACCAATTCCCATACATTATTGTGCTCCAGCTGGTTTTGCGATTCTAAAGTGCAATGGGAAAAAATTTAATGGAACAGGACCATGCACAAATGTCAGCACAGTACAATGCACACATGGAATTAGGCCAGTGGTATCAACTCAACTGTTGTTAAATGGAAGCCTAGCAGAAGTGGAGGAGGTAATAATTAGATCTAAAAATATTACAGATAATACCAAAAACATAATAGTACAGTTAAATGAACCTGTACAAATTAACTGTACCAGAACAGGCAATAATACGAGAAAAAGTATACGTATAGGGCCAGGACAAGCATTCTATGCAACAGGTGACATCATAGGAGATATAAGACGAGCATATTGTAATATTAGTGGAAAACAATGGAATGAGACCTTACACAAGGTAATCACCAAATTAGGAAGCTACTTTGACAATAAAACAATAATTTTACAACCACCCGCAGGAGGGGATATAGAGATTATAACACATAGTTTTAATTGTGGAGGAGAGTTTTTCTATTGCAATACAACAAAATTGTTTAATAGCACCTGGACCAATAGCAGCTATACCAATGACACCTATAACAGCAACAGCACAGAAGATATCACAGGAAATATCACACTACAATGCAAAATAAAACAAATTGTGAACATGTGGCAGAGAGTAGGACAAGCAATGTATGCCCCTCCCATCAGAGGAAACATCACATGTATATCAAATATTACAGGACTAATATTGACATTTGACCGGAATAATACAAATAATGTTACCTTCAGACCTGGAGGAGGAGATATGAGGGACAATTGGAGAAGTGAATTATATAAATATAAAGTAGTAAAAATTGAACCACTGGGAGTAGCACCAACCGAGGCAAGGAGAAGAGTGGTGGAGAGAGAAAAAAGAGCAGTAGGAATGGGAGCTTTTTTCCTTGGGTTCTTGGGAGCAGCAGGAAGCACTATGGGCGCAGCGTCTATAACGTTGACGGTACAGGCCAGACAATTATTGTCTGGTATAGTGCAACAGCAAAGCAATTTGCTGAGAGCTATACAGGCGCAACAGCATATGTTGCAGCTCACGGTCTGGGGTATTAAACAACTCCAGGCAAGAGTCCTAGCTGTGGAAAGATACCTAAAGGATCAACAGCTCCTGGGGATTTGGGGCTGCTCTGGAAAACTCATCTGCACCACTAATGTGCCTTGGAACTCTAGTTGGAGTAATAAATCTCTGGATGAAATTTGGGACAACATGACTTGGATGGAGTGGGACAAACAAATTAACAATTACACAGATGAAATATACAGATTGCTTGAAGTCTCGCAAAACCAGCAGGAAAAGAATGAACAAGACTTATTAGCATTGGACAAATGGGCAAATCTATGGAATTGGTTTAGTATAACAAATTGGCTGTGGTATATAAGAATATTCATAATGATAGTAGGAGGTATAATAGGCTTAAGAATAGTTTTTGCTGTGCTTTCTATAGTAAATAGAGTTAGGCAGGGATACTCACCTCTGTCTTTACAGACCCTTATCCCGAACCAGCGGGGACCCGACAGGCCCAGAGAAATAGAAGAAGAAGGTGGCGAGCAAGACAGAGACAGATCCATTCGATTGGTGAACGGGTTCTTGCCACTTGTCTGGGAGGACCTGCGGAACCTGTGCCTCTTCAGCTACCGCCGCTTGAGAGACTTACTCTCGATTGTAGCGAGGACTGTGGAACTTCTGGGGAGAAGGGGGTGGGAAGCCCTCAAACTTCTGGGGAATCTCCTGCTGTATTGGGGACAGGAGCTAAAGAATAGTGCTATTAGTTTACTTAATACTACAGCAATAGCTGTAGCTGAGGGAACAGATAGGATTATAGAACTAGTGCAAAGAGCTTGGAGAGCTATCCTCCACATACCTAGAAGAATAAGACAGGGCTTTGAAAGGGCTTTGCTATAACAATGGGAGGCAAATGGTCAAAAGGTTGTATAAGTGGATGGCCTGCTGTAAGGGAAAGAATAAGGCAAACTGAGCCAGCAGCAGAAGGGGTAGGAGCAGTGTCTCAAGATTTAGATAGACGTGGAGCAGTCACAATCAATAACATAGCATCTAATAATGCTGACTCCGCCTGGCTGGAAGCACAAGAGGAAGAAGAGGAAGTAGGCTTTCCAGTCAGGCCGCAGGTACCTTTAAGACCAATGACCTATAAGGGAGCTTTTGATCTCAGCCATTTTTTAAAAGAAAAGGGGGGACTGGAAGGGTTAATTTACTCCAAGAAAAGACAAGAGATCCTTGATCTGTGGGTCTATAACACACAAGGTTACTTCCCTGACTGGCATAACTACACACCAGGGCCAGGGGAGAGATATCCCCTGACCTTTGGATGGTGCTTCAAACTAGTGCCAGTAGATCCACAGGATGTGGAAAAGGCCAATGAAGGAGAGAACAACAGCTTGTTACACCCTATGTGCCAACATGGAATAGAGGATCCAGAGAGAGAAGTACTAATGTGGAAGTTTGACAGTCGACTAGCACTGAGACACAGAGCCAAAGAGCTGCATCCGGAGTTCTACAAAGACTGCTGACACAGAAGTTGCTGACACAGAAGATTCTATACAGGGACTTTCCGCTGGGACTTTCTGGGGAGGTGTGGTCTGGGCGGGACTAGGGAGTGGCTAACCCTCAGATGCTGCATATAAGCAGCTGCTTTTCGCTTGTACTGGGTCTCTCTGGTTAGACCAGATCAGAGCCTGGGAGCTCTCTGGCTAGCTAGGGAACCCACTGCTTAAGCCTCAATAAAGCTTGCCTTGAGGGCGCATGC
>B.US.83.SF2.K02007_H.BE.93.VI997.AF190128
[truncated: 546,469 more chars]
