# Supplementary material for: More accurate recombination prediction in HIV-1 using a robust decoding algorithm for HMMs
Source: BMC Bioinformatics. 2011 May 17;12:168. doi: 10.1186/1471-2105-12-168 (PMC3123234; doi:10.1186/1471-2105-12-168)
Supplement: Additional file 1 — Data sets. This file contains sequences and their annotations for the single-breakpoint and short interval data sets. [file 1471-2105-12-168-S1.GZ › datasets/single_breakpoint_annotations.txt]

>A1.KE.00.KNH1209.AF457069_A2.CD.97.97CDKTB48.AF286238
1	6614	A1
6615	8855	A2

>A1.TZ.01.A341.AY253314_B.DK.x.CTL_033.EF514709
1	5524	A1
5525	8371	B

>A1.RW.92.92RW025A.AB287376_B.US.94.94US_33931N.AY713410
1	7611	A1
7612	9568	B

>A1.UA.00.98UA0116.AF413987_C.ZA.04.04ZAPS190B1.DQ093602
1	7082	A1
7083	9635	C

>A1.KE.00.KNH1144.AF457066_C.BW.00.00BW17835.AF443096
1	6188	A1
6189	8939	C

>A1.RU.00.RU00051.EF545108_D.UG.99.99UGA08483.AY304496
1	6426	A1
6427	8885	D

>A1.UA.01.01UAPol303.DQ823360_D.UG.93.93UG_065.AY713418
1	8260	A1
8261	8807	D

>A1.SE.95.SE8891.AF069673_F1.ES.x.X1093_2.DQ979025
1	4074	A1
4075	8699	F1

>A1.KE.00.KNH1207.AF457068_F1.FR.96.MP411.AJ249238
1	379	A1
380	8620	F1

>A1.UA.01.01UAOD10.DQ823365_F2.CM.95.MP257.AJ249237
1	4109	A1
4110	8579	F2

>A1.KE.00.KNH1199.AF457067_F2.CM.02.02CM_0016BBY.AY371158
1	4238	A1
4239	8361	F2

>A1.RW.92.92RW008.AB253421_G.NG.01.01NGPL0760.DQ168579
1	3582	A1
3583	9703	G

>A1.KE.x.ML752.EU110085_G.BE.96.DRCBL.AF084936
1	8392	A1
8393	9136	G

>A1.SE.95.UGSE8131.AF107771_H.CF.90.056.AF005496
1	1954	A1
1955	8978	H

>A1.UA.01.01UAPol293.DQ823359_H.BE.93.VI997.AF190128
1	2145	A1
2146	8830	H

>A1.UA.01.01UADN121.DQ823358_J.SE.94.SE7022.AF082395
1	305	A1
306	8834	J

>A1.UA.00.98UA0116.AF413987_J.SE.93.SE7887.AF082394
1	2655	A1
2656	9628	J

>A1.KE.00.KER2009.AF457053_K.CD.97.EQTB11C.AJ249235
1	4374	A1
4375	8607	K

>A1.UA.01.01UAPol294.DQ823356_K.CM.96.MP535.AJ249239
1	5193	A1
5194	8607	K

>A2.CY.94.94CY017_41.AF286237_B.BR.03.BREPM1028.EF637053
1	3869	A2
3870	8920	B

>A2.CD.97.97CDKTB48.AF286238_B.BO.99.BOL0122.AY037270
1	3065	A2
3066	8947	B

>A2.CD.97.97CDKTB48.AF286238_C.ZA.04.04ZASK173B1.DQ093604
1	6092	A2
6093	8970	C

>A2.CY.94.94CY017_41.AF286237_D.UG.99.99UGE13613.AF484515
1	6289	A2
6290	8963	D

>A2.CD.97.97CDKTB48.AF286238_D.YE.01.01YE386.AY795903
1	7188	A2
7189	8919	D

>A2.CD.97.97CDKTB48.AF286238_F1.BR.93.93BR020_1.AF005494
1	6070	A2
6071	8947	F1

>A2.CY.94.94CY017_41.AF286237_F2.CM.95.MP257.AJ249237
1	7002	A2
7003	8768	F2

>A2.CD.97.97CDKS10.AF286241_G.NG.01.01NGPL0669.DQ168576
1	3717	A2
3718	5757	G

>A2.CD.97.97CDKTB48.AF286238_G.CM.96.96CMABB55.AY772535
1	8419	A2
8420	8894	G

>A2.CY.94.94CY017_41.AF286237_H.BE.93.VI991.AF190127
1	6580	A2
6581	9035	H

>A2.CD.97.97CDKS10.AF286241_H.BE.93.VI997.AF190128
1	1217	A2
1218	5748	H

>A2.CD.97.97CDKS10.AF286241_J.CD.97.J_97DC_KTB147.EF614151
1	3612	A2
3613	5661	J

>A2.CD.97.97CDKTB48.AF286238_J.SE.93.SE7887.AF082394
1	3348	A2
3349	8967	J

>A2.CY.94.94CY017_41.AF286237_K.CM.96.MP535.AJ249239
1	5087	A2
5088	8765	K

>A2.CD.97.97CDKTB48.AF286238_K.CD.97.EQTB11C.AJ249235
1	1533	A2
1534	8748	K

>B.UA.01.01UAKV167.DQ823362_C.ZM.02.02ZM115.AB254148
1	7848	B
7849	8903	C

>B.TH.99.99TH_C1416.AY945711_C.ZA.03.03ZASK098B1.AY878061
1	3552	B
3553	8787	C

>B.US.97.1012_08.AY331285_D.UG.98.98UG57131.AF484505
1	8248	B
8249	8826	D

>B.US.94.5082_94.AY835773_D.YE.01.01YE386.AY795903
1	2521	B
2522	9587	D

>B.YE.02.02YE507.AY795904_F1.BE.93.VI850.AF077336
1	5001	B
5002	8780	F1

>B.AU.x.C76.AF538306_F1.BR.93.93BR020_1.AF005494
1	3603	B
3604	9645	F1

>B.US.90.US4.AY173955_F2.CM.95.MP257.AJ249237
1	5984	B
5985	8730	F2

>B.GB.86.GB8.AJ271445_F2.CM.97.CM53657.AF377956
1	3912	B
3913	9612	F2

>B.CA.x.HDM003V01.DQ322227_G.KE.93.HH8793_12_1.AF061641
1	7239	B
7240	8918	G

>B.CO.01.PCM001.AY561236_G.CM.01.01CM_4049HAN.AY371121
1	5775	B
5776	8358	G

>B.US.97.1006_08.AY331284_H.BE.93.VI991.AF190127
1	5190	B
5191	8881	H

>B.US.83.SF2.K02007_H.BE.93.VI997.AF190128
1	7423	B
7424	9643	H

>B.CU.99.Cu43.AY586543_J.CD.97.J_97DC_KTB147.EF614151
1	6837	B
6838	9096	J

>B.US.90.US1.AY173952_J.SE.93.SE7887.AF082394
1	4938	B
4939	8975	J

>B.US.86.YU_2.M93258_K.CD.97.EQTB11C.AJ249235
1	4353	B
4354	9401	K

>B.JP.00.DR2508.AB289588_K.CM.96.MP535.AJ249239
1	4068	B
4069	9426	K

>C.ZA.04.04ZASK178B1.DQ093587_D.ZA.85.R214.AY773339
1	4772	C
4773	8849	D

>C.ZA.99.99ZACM9.AF411967_D.YE.01.01YE386.AY795903
1	6797	C
6798	9569	D

>C.ZM.02.02ZM108.AB254141_F1.ES.x.X1670.DQ979024
1	8229	C
8230	9566	F1

>C.ZA.04.04ZASK183B1.AY878055_F1.BR.89.BZ126.AY173957
1	6196	C
6197	9066	F1

>C.ZA.04.04ZAPS202B1.DQ093598_F2.CM.95.MP255.AJ249236
1	6298	C
6299	8803	F2

>C.ZA.03.03ZAPS143MB1.DQ396391_F2.CM.02.02CM_0016BBY.AY371158
1	7104	C
7105	8600	F2

>C.BW.96.96BW01B03.AF110959_G.CU.99.Cu85.AY586548
1	4908	C
4909	8969	G

>C.ZA.03.03ZASK233B1.DQ351234_G.GH.03.03GH175G.AB287004
1	6362	C
6363	9050	G

>C.ZA.03.03ZASK224MB1.DQ275664_H.BE.93.VI991.AF190127
1	4713	C
4714	9077	H

>C.ZA.04.04ZAPS205B1.DQ093599_H.CF.90.056.AF005496
1	469	C
470	9040	H

>C.BW.96.96BW01B03.AF110959_J.SE.94.SE7022.AF082395
1	6750	C
6751	9094	J

>C.SN.90.90SE_364.AY713416_J.SE.93.SE7887.AF082394
1	4931	C
4932	8798	J

>C.ZM.02.02ZM108.AB254141_K.CM.96.MP535.AJ249239
1	8418	C
8419	9481	K

>C.ZA.03.03ZASK013B2.DQ275660_K.CD.97.EQTB11C.AJ249235
1	747	C
748	8817	K

>D.UG.98.98UG57143.AF484514_F1.BR.89.BZ126.AY173957
1	1242	D
1243	8888	F1

>D.UG.99.99UGE23438.AF484489_F1.BR.89.BZ163.AY173958
1	2535	D
2536	8863	F1

>D.TD.99.MN011.AJ488926_F2.CM.95.MP255.AJ249236
1	5272	D
5273	8580	F2

>D.UG.98.98UG57131.AF484505_F2.CM.02.02CM_0016BBY.AY371158
1	1241	D
1242	8367	F2

>D.TD.99.MN012.AJ488927_G.NG.01.01NGPL0669.DQ168576
1	1817	D
1818	8856	G

>D.UG.99.99UGE08364.AF484487_G.NG.01.PL0567.DQ168573
1	3479	D
3480	8821	G

>D.TD.99.MN012.AJ488927_H.BE.93.VI991.AF190127
1	5392	D
5393	8898	H

>D.ZA.85.R286.AY773340_H.CF.90.056.AF005496
1	3728	D
3729	8877	H

>D.ZA.90.R1.EF633445_J.CD.97.J_97DC_KTB147.EF614151
1	3154	D
3155	8891	J

>D.TD.99.MN011.AJ488926_J.SE.93.SE7887.AF082394
1	8052	D
8053	8838	J

>D.UG.99.99UGD23550.AF484485_K.CD.97.EQTB11C.AJ249235
1	5427	D
5428	8606	K

>D.CM.01.01CM_4412HAL.AY371157_K.CM.96.MP535.AJ249239
1	514	D
515	8610	K

>F1.FR.96.MP411.AJ249238_F2.CM.95.MP255.AJ249236
1	7728	F1
7729	8563	F2

>F1.ES.x.P1146.DQ979023_F2.CM.02.02CM_0016BBY.AY371158
1	5735	F1
5736	8449	F2

>F1.BR.93.93BR020_1.AF005494_G.CM.96.96CMABB55.AY772535
1	868	F1
869	8867	G

>F1.FR.96.MP411.AJ249238_G.PT.x.PT2695.AY612637
1	7765	F1
7766	8790	G

>F1.ES.x.X1670.DQ979024_H.CF.90.056.AF005496
1	7986	F1
7987	9059	H

>F1.BR.89.BZ126.AY173957_H.BE.93.VI997.AF190128
1	5841	F1
5842	8993	H

>F1.FI.93.FIN9363.AF075703_J.CD.97.J_97DC_KTB147.EF614151
1	5377	F1
5378	8874	J

>F1.BR.89.BZ163.AY173958_J.SE.93.SE7887.AF082394
1	2095	F1
2096	8962	J

>F1.FR.96.MP411.AJ249238_K.CD.97.EQTB11C.AJ249235
1	3306	F1
3307	8606	K

>F1.ES.x.P1146.DQ979023_K.CM.96.MP535.AJ249239
1	1560	F1
1561	8685	K

>F2.CM.97.CM53657.AF377956_G.KE.93.HH8793_12_1.AF061641
1	7270	F2
7271	8848	G

>F2.CM.02.02CM_0016BBY.AY371158_G.NG.01.PL0567.DQ168573
1	1943	F2
1944	8806	G

>F2.CM.95.MP257.AJ249237_H.BE.93.VI991.AF190127
1	2540	F2
2541	8876	H

>F2.CM.95.MP255.AJ249236_H.BE.93.VI997.AF190128
1	3392	F2
3393	8827	H

>F2.CM.95.MP255.AJ249236_J.CD.97.J_97DC_KTB147.EF614151
1	509	F2
510	8743	J

>F2.CM.02.02CM_0016BBY.AY371158_J.SE.93.SE7887.AF082394
1	4343	F2
4344	8819	J

>F2.CM.95.MP257.AJ249237_K.CM.96.MP535.AJ249239
1	5449	F2
5450	8613	K

>F2.CM.02.02CM_0016BBY.AY371158_K.CD.97.EQTB11C.AJ249235
1	3553	F2
3554	8593	K

>G.KE.93.HH8793_12_1.AF061641_H.CF.90.056.AF005496
1	500	G
501	9008	H

>G.BE.96.DRCBL.AF084936_H.BE.93.VI997.AF190128
1	5957	G
5958	9588	H

>G.NG.01.01NGPL0674.DQ168575_J.CD.97.J_97DC_KTB147.EF614151
1	63	G
64	8746	J

>G.GH.03.03GH175G.AB287004_J.SE.93.SE7887.AF082394
1	1453	G
1454	9660	J

>G.NG.01.01NGPL0674.DQ168575_K.CD.97.EQTB11C.AJ249235
1	6995	G
6996	8619	K

>G.NG.01.PL0567.DQ168573_K.CM.96.MP535.AJ249239
1	552	G
553	8598	K

>H.CF.90.056.AF005496_J.CD.97.J_97DC_KTB147.EF614151
1	4676	H
4677	8892	J

>H.BE.93.VI997.AF190128_J.SE.94.SE7022.AF082395
1	6460	H
6461	8965	J

>H.BE.93.VI991.AF190127_K.CM.96.MP535.AJ249239
1	872	H
873	8797	K

>H.BE.93.VI997.AF190128_K.CD.97.EQTB11C.AJ249235
1	2965	H
2966	8728	K

>J.CD.97.J_97DC_KTB147.EF614151_K.CM.96.MP535.AJ249239
1	519	J
520	8600	K

>J.SE.94.SE7022.AF082395_K.CD.97.EQTB11C.AJ249235
1	5478	J
5479	8725	K
